# Supplementary material
Source: PubMed Central journal article supplement (PMC7863911)

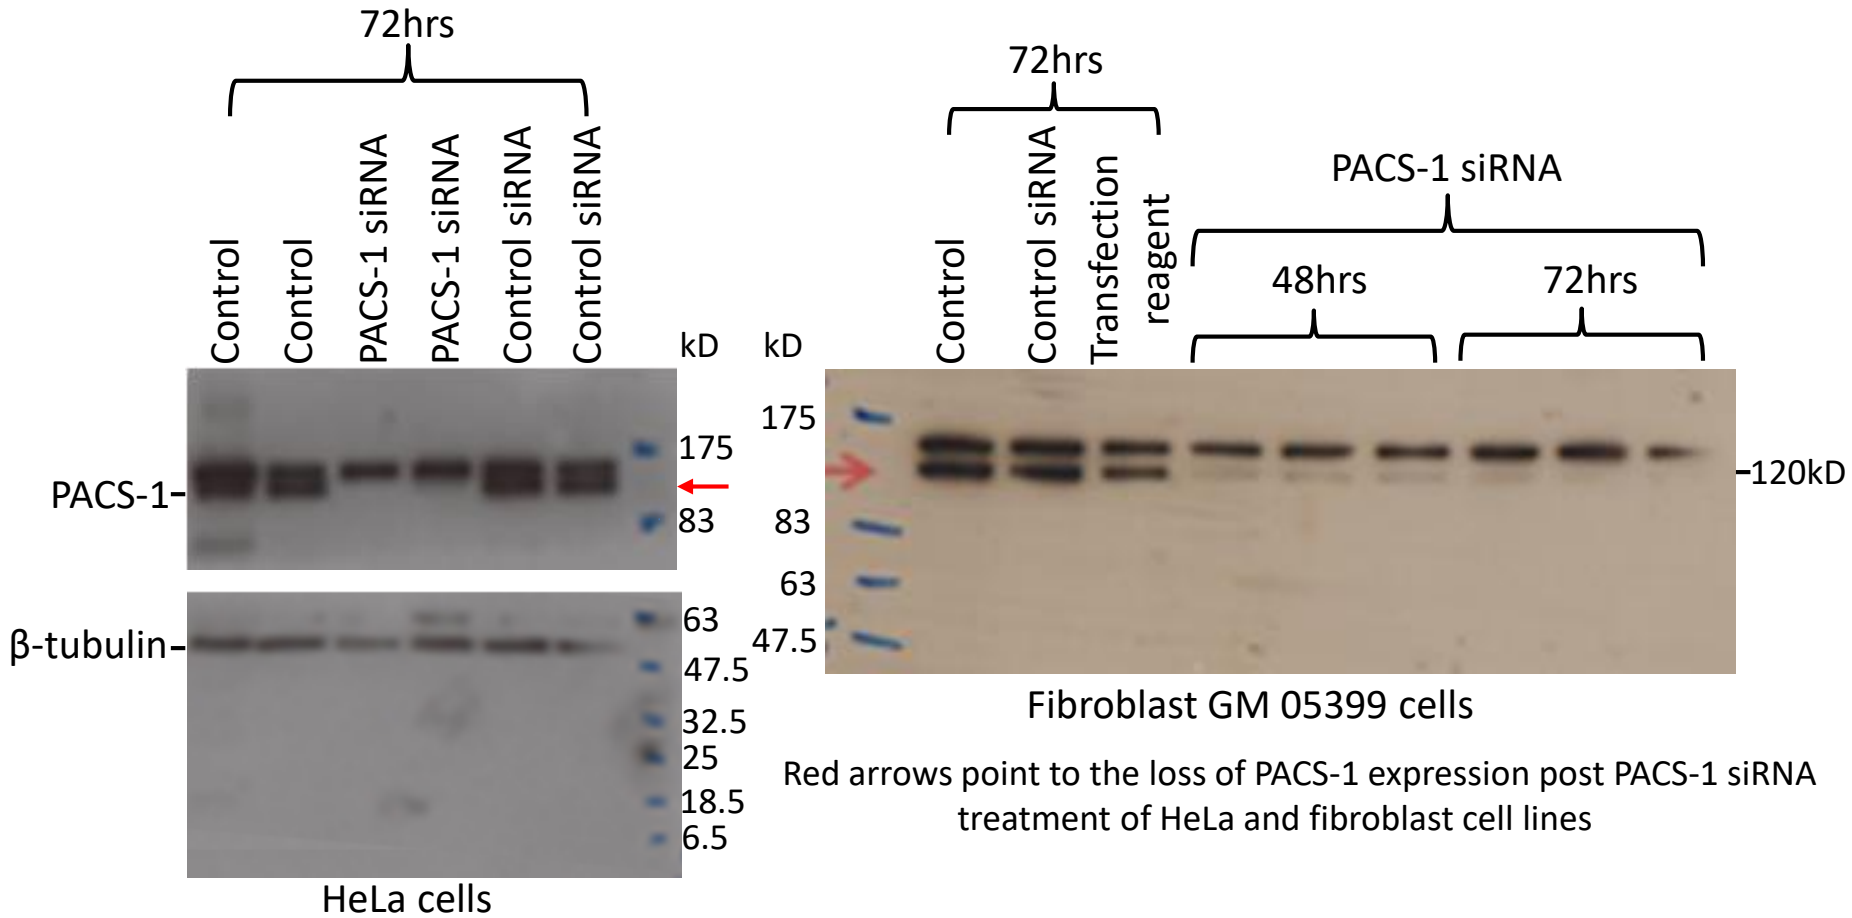

# PACS1 Gene Expression

Veena et al\_supplementary figure\_2

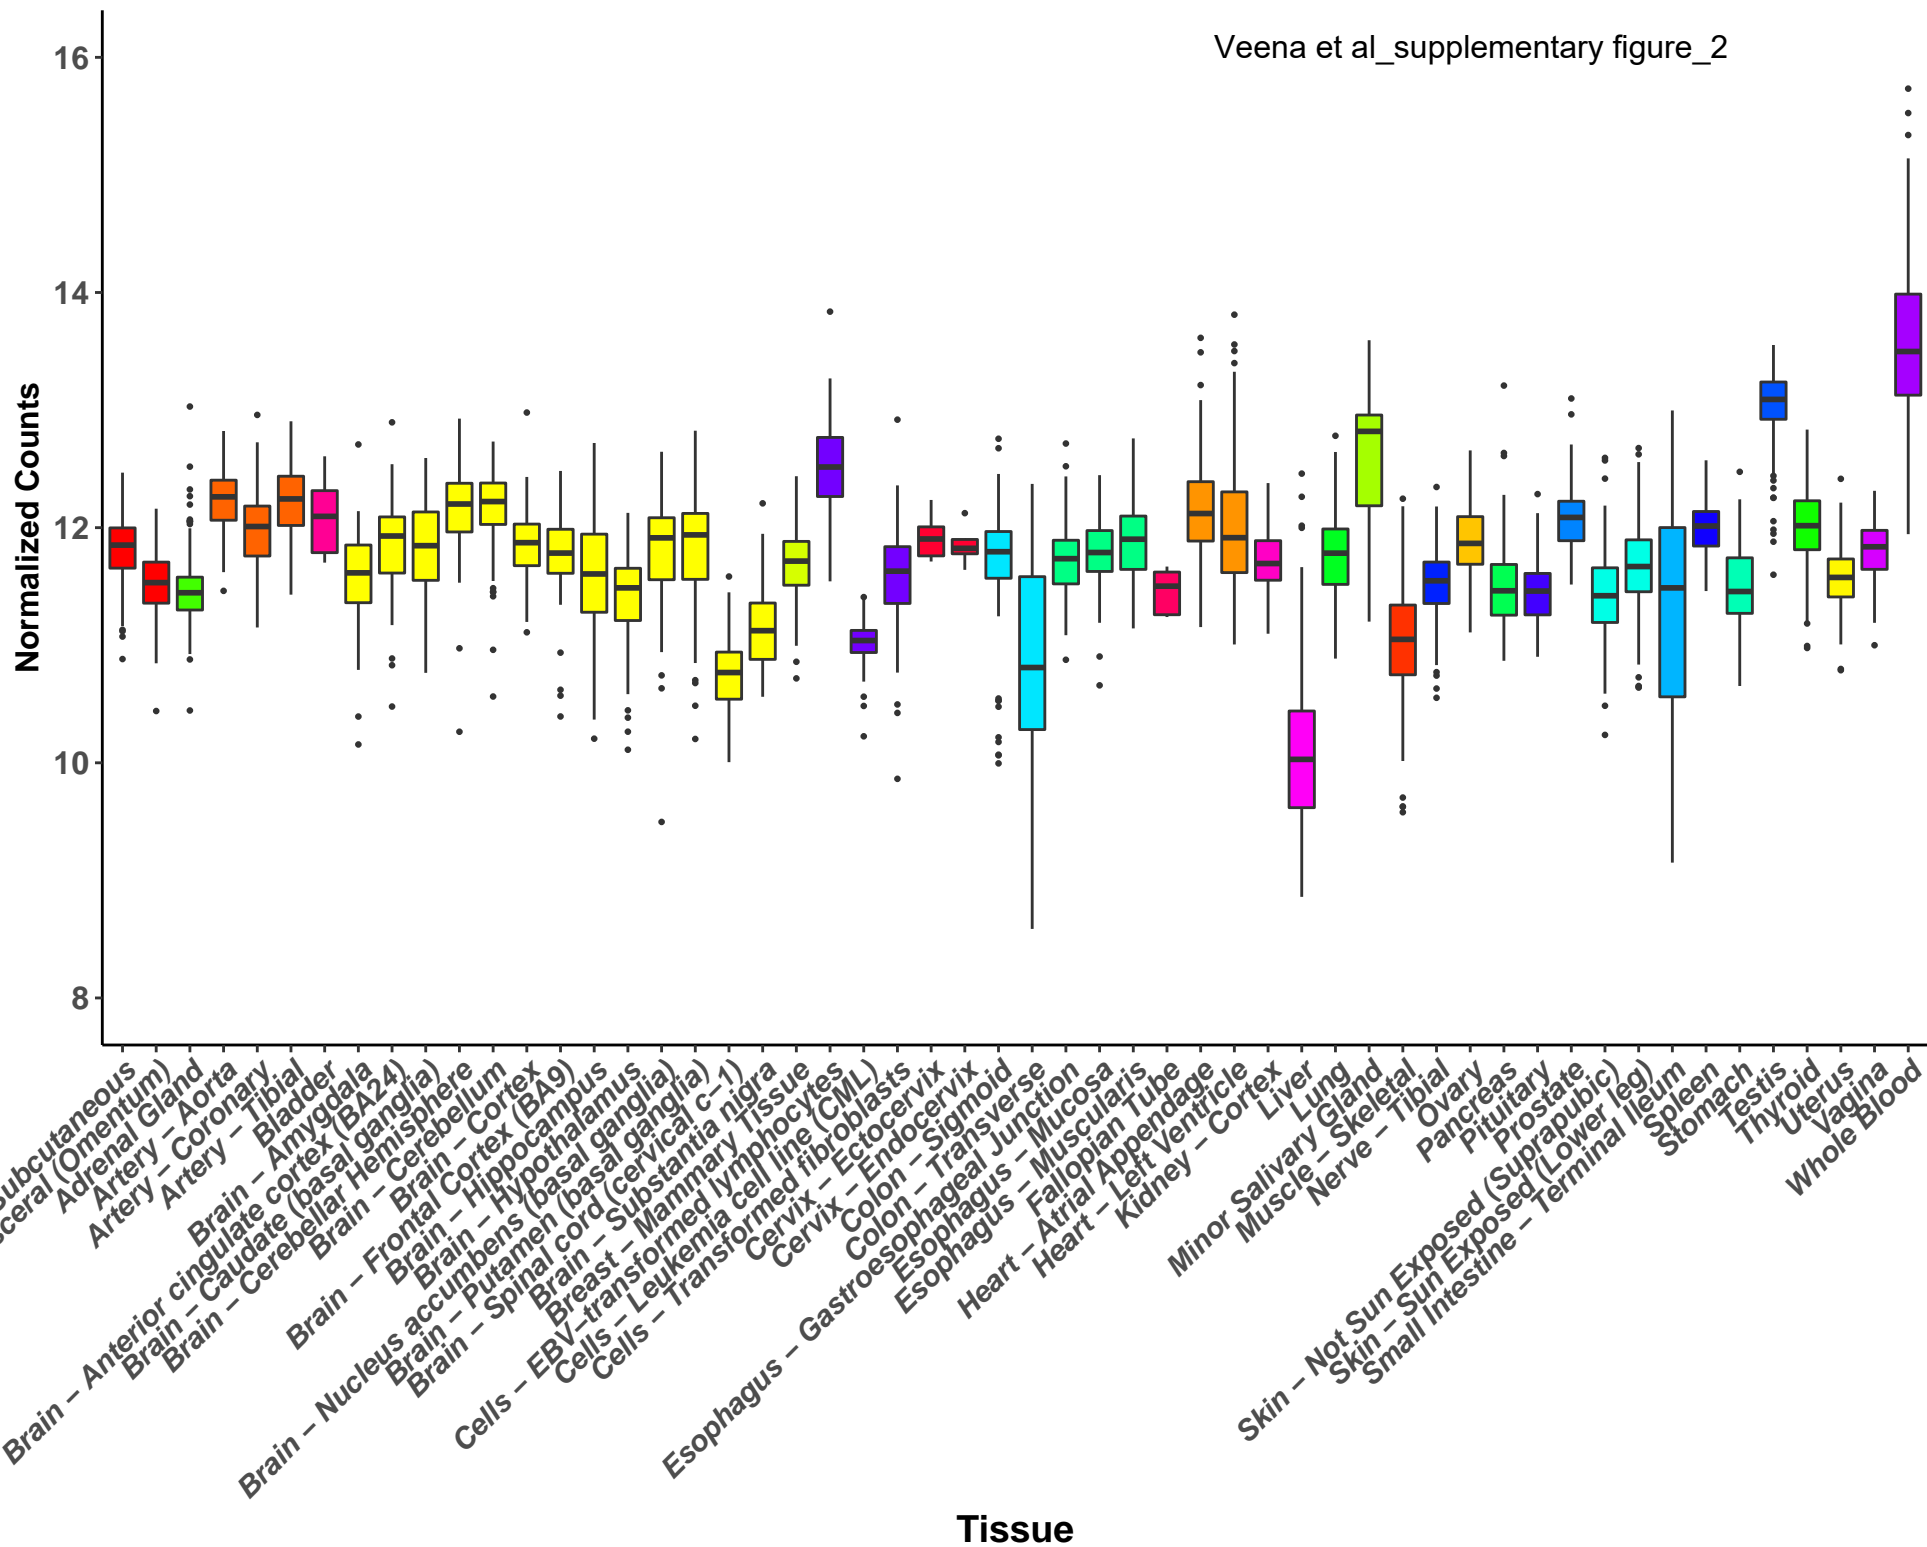

hsa-miR-449a

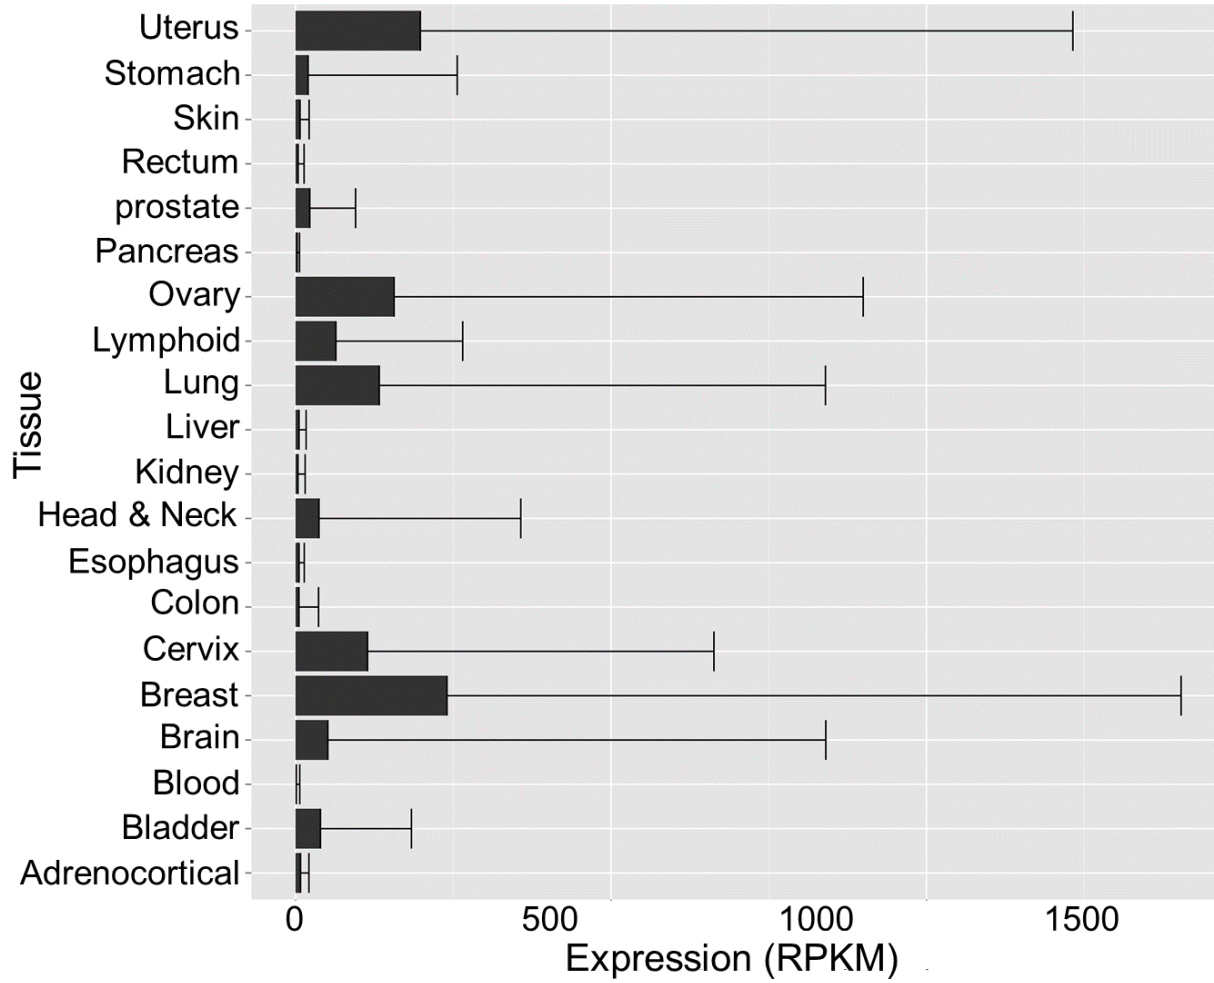

hsa-miR-34a-5p

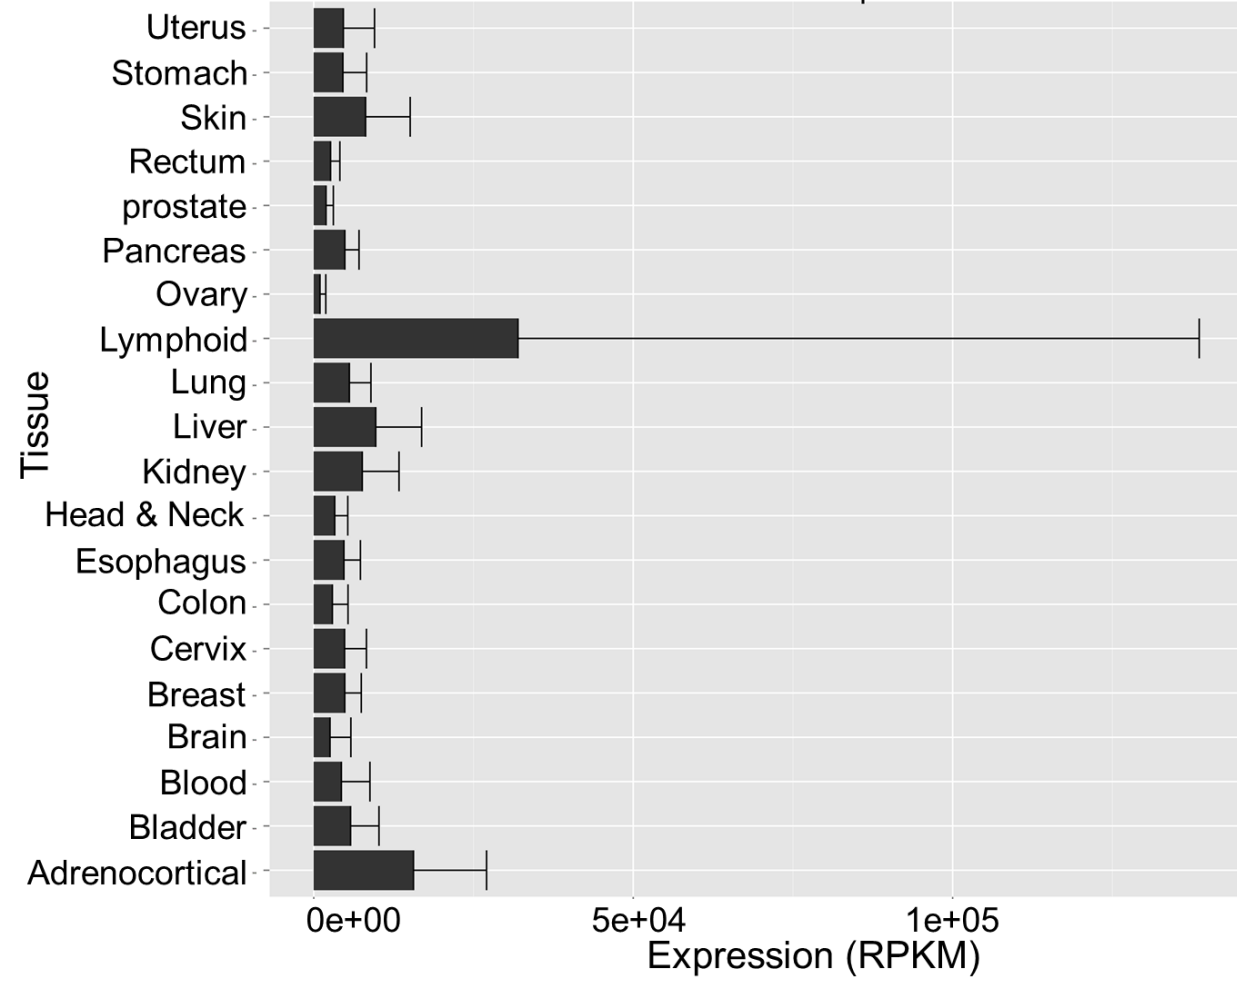

HeLa + FAS

HeLa

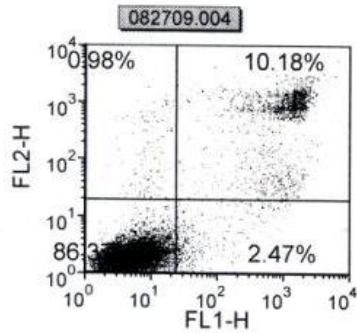

| Gate | X Geometric Mean | Y Geometric Mean | % of Gated Cells | % of All Cells |
|------|------------------|------------------|------------------|----------------|
| UL   | 9.18             | 119.54           | 0.98             | 0.94           |
| UR   | 865.65           | 491.27           | 10.18            | 9.76           |
| LL   | 4.86             | 1.72             | 86.37            | 82.76          |
| LR   | 69.04            | 4.06             | 2.47             | 2.37           |

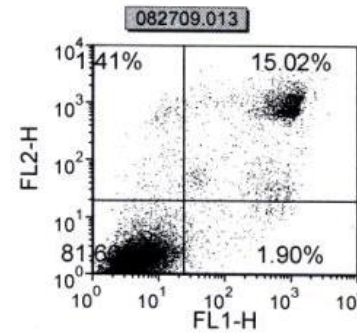

| Gate | X Geometric Mean | Y Geometric Mean | % of Gated Cells | % of All Cells |
|------|------------------|------------------|------------------|----------------|
| UL   | 10.96            | 152.95           | 1.41             | 1.34           |
| UR   | 591.11           | 518.33           | 15.02            | 14.24          |
| LL   | 4.58             | 1.75             | 81.66            | 77.39          |
| LR   | 100.69           | 5.48             | 1.9              | 1.8            |

HeLa + Scrambled siRNA

HeLa + Scrambled siRNA + FAS

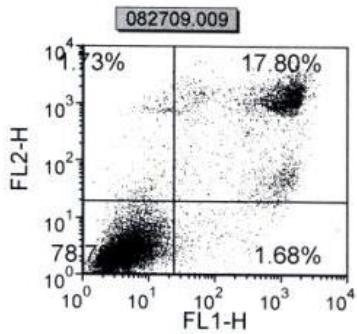

| Gate | X Geometric Mean | Y Geometric Mean | % of Gated Cells | % of All Cells |
|------|------------------|------------------|------------------|----------------|
| UL   | 10.54            | 121.68           | 1.73             | 1.66           |
| UR   | 755.29           | 636.67           | 17.8             | 17.05          |
| LL   | 4.41             | 2.39             | 78.79            | 75.46          |
| LR   | 105.84           | 5.76             | 1.68             | 1.6            |

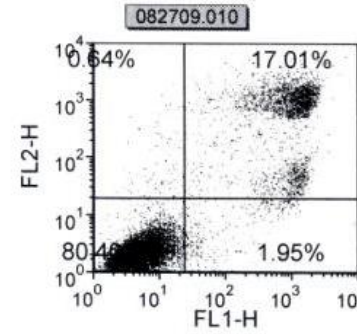

| Gate | X Geometric Mean | Y Geometric Mean | % of Gated Cells | % of All Cells |
|------|------------------|------------------|------------------|----------------|
| UL   | 10.19            | 80.16            | 0.64             | 0.62           |
| UR   | 786.28           | 472.45           | 17.01            | 16.4           |
| LL   | 4.71             | 1.96             | 80.4             | 77.55          |
| LR   | 110.03           | 5.66             | 1.95             | 1.88           |

HeLa + PACS1 siRNA

HeLa + PACS1 siRNA + FAS

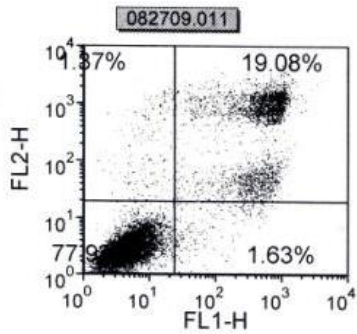

| Gate | X Geometric Mean | Y Geometric Mean | % of Gated Cells | % of All Cells |
|------|------------------|------------------|------------------|----------------|
| UL   | 9.39             | 168.9            | 1.37             | 1.27           |
| UR   | 407.02           | 375.24           | 19.08            | 17.69          |
| LL   | 4.3              | 2.48             | 77.92            | 72.25          |
| LR   | 92.67            | 7.09             | 1.63             | 1.52           |

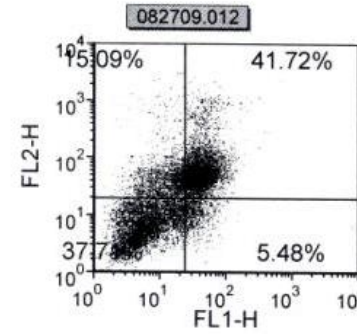

| Gate | X Geometric Mean | Y Geometric Mean | % of Gated Cells | % of All Cells |
|------|------------------|------------------|------------------|----------------|
| UL   | 12.57            | 45.12            | 15.09            | 11.76          |
| UR   | 41.93            | 57.04            | 41.72            | 32.52          |
| LL   | 5.81             | 5.89             | 37.71            | 29.4           |
| LR   | 36.26            | 9.98             | 5.48             | 4.28           |

Propidium iodide

Annexin →

48 hours

Percent PI labeling in EdU incorporated samples

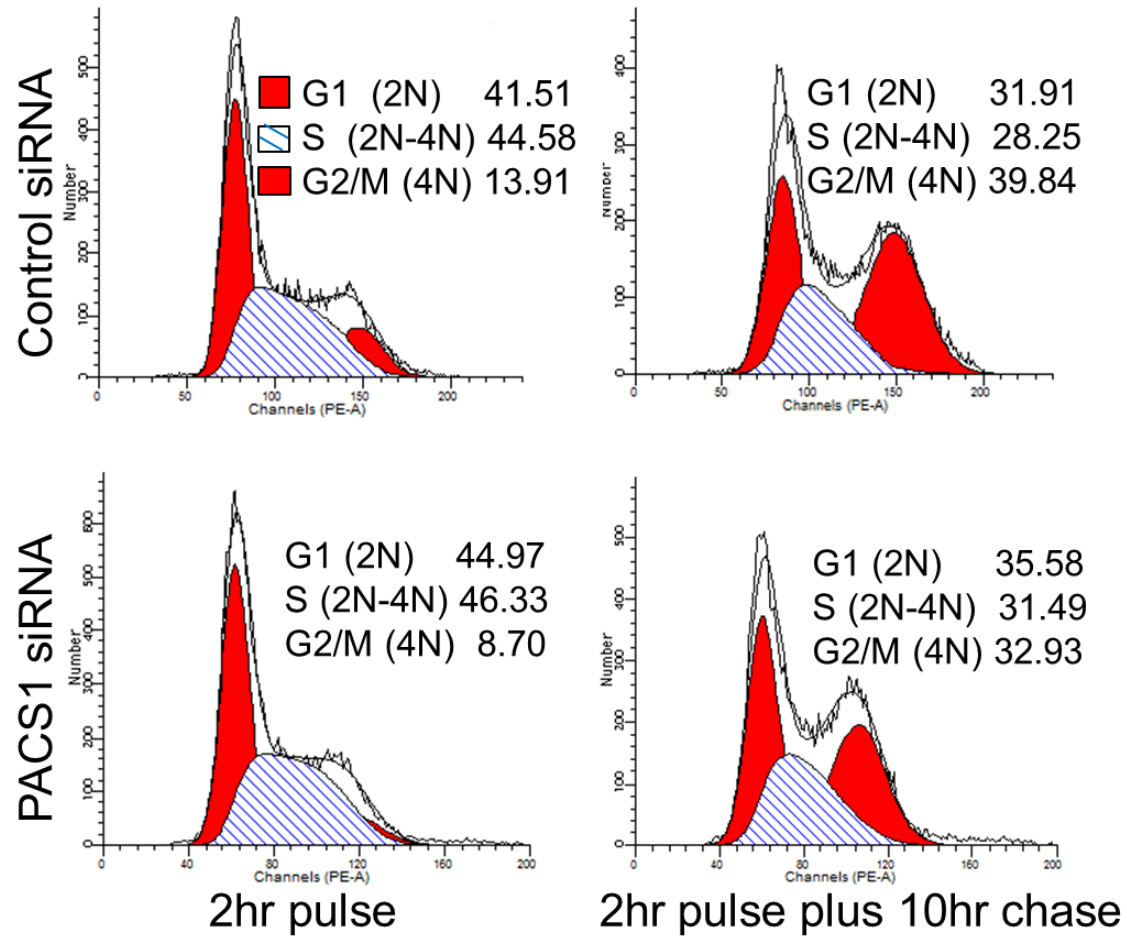

**Color Key**

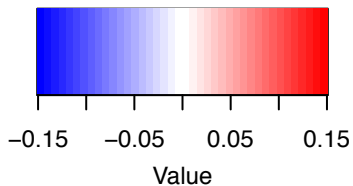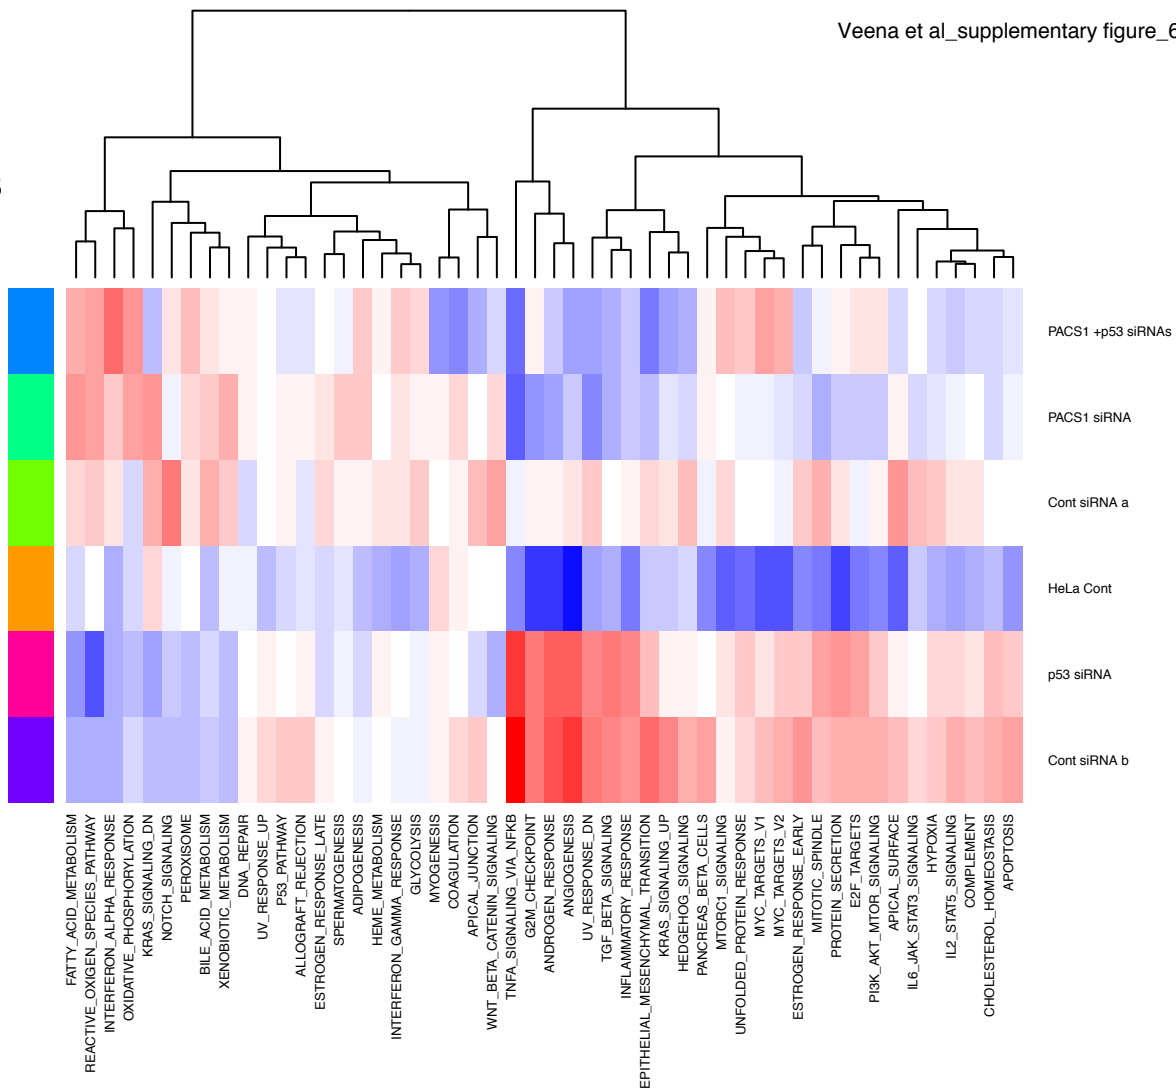



## GM00023\_PACS1\_siRNA vs GM00023\_Cont\_siRNA

Veena et al\_supplementary figure\_7A

| chromosome | start    | end      | test | ref | position | log2     | p.value   | cnv | cnv.size | cnv.log2     | cnv.p.value |
|------------|----------|----------|------|-----|----------|----------|-----------|-----|----------|--------------|-------------|
| chr10      | 46600001 | 46700000 | 4    | 7   | 46650000 | -0.87973 | 6.33E-32  | 20  | 250000   | -1.426008725 | 0           |
| chr10      | 46650001 | 46750000 | 2    | 8   | 46700000 | -2.07237 | 5.62E-105 | 20  | 250000   | -1.426008725 | 0           |
| chr9       | 67600001 | 67700000 | 13   | 4   | 67650000 | 1.628068 | 2.19E-76  | 17  | 250000   | 1.29686204   | 2.08E-272   |
| chr9       | 67650001 | 67750000 | 14   | 8   | 67700000 | 0.734983 | 3.27E-23  | 17  | 250000   | 1.29686204   | 2.08E-272   |
| chr15      | 21200001 | 21300000 | 30   | 50  | 21250000 | -0.80934 | 7.76E-28  | 14  | 2.00E+05 | -0.94178766  | 5.78E-136   |
| chr15      | 21250001 | 21350000 | 10   | 23  | 21300000 | -1.27401 | 7.92E-57  | 14  | 2.00E+05 | -0.94178766  | 5.78E-136   |
| chr15      | 21300001 | 21400000 | 10   | 17  | 21350000 | -0.83791 | 1.78E-29  | 14  | 2.00E+05 | -0.94178766  | 5.78E-136   |
| chrY       | 3350001  | 3450000  | 16   | 25  | 3400000  | -0.71623 | 1.02E-22  | 6   | 3.00E+05 | -0.833184106 | 2.04E-164   |
| chrY       | 3400001  | 3500000  | 15   | 22  | 3450000  | -0.62491 | 4.39E-18  | 6   | 3.00E+05 | -0.833184106 | 2.04E-164   |
| chrY       | 3100001  | 3200000  | 12   | 3   | 3150000  | 1.927628 | 4.39E-93  | 2   | 2.00E+05 | 1.92762823   | 0           |
| chrY       | 3150001  | 3250000  | 13   | 3   | 3200000  | 2.043105 | 5.09E-99  | 2   | 2.00E+05 | 1.92762823   | 0           |
| chr22      | 16400001 | 16500000 | 13   | 7   | 16450000 | 0.820713 | 8.26E-28  | 1   | 2.00E+05 | 0.99371742   | 2.23E-144   |
| chr22      | 16450001 | 16550000 | 16   | 8   | 16500000 | 0.927628 | 7.06E-34  | 1   | 2.00E+05 | 0.99371742   | 2.23E-144   |
| chr22      | 16500001 | 16600000 | 21   | 9   | 16550000 | 1.150021 | 2.93E-47  | 1   | 2.00E+05 | 0.99371742   | 2.23E-144   |
| chr22      | 16550001 | 16650000 | 17   | 8   | 16600000 | 1.015091 | 4.76E-39  | 1   | 2.00E+05 | 0.99371742   | 2.23E-144   |

## HeLa\_PACS\_siRNA vs HeLa\_cont\_siRNA

| chromosome | start    | end      | test | ref | position | log2     | p.value  | cnv | cnv.size | cnv.log2     | cnv.p.value |
|------------|----------|----------|------|-----|----------|----------|----------|-----|----------|--------------|-------------|
| chr10      | 46550001 | 46650000 | 2    | 7   | 46600000 | -1.61139 | 4.72E-58 | 22  | 250000   | -1.541002559 | 2.83E-265   |
| chr10      | 46600001 | 46700000 | 3    | 8   | 46650000 | -1.21907 | 5.55E-40 | 22  | 250000   | -1.541002559 | 2.83E-265   |
| chr10      | 46650001 | 46750000 | 3    | 10  | 46700000 | -1.541   | 6.69E-55 | 22  | 250000   | -1.541002559 | 2.83E-265   |
| chr9       | 67900001 | 68000000 | 1    | 6   | 67950000 | -2.389   | 7.64E-88 | 21  | 2.00E+05 | -1.569571711 | 8.99E-218   |
| chr9       | 44350001 | 44450000 | 1    | 8   | 44400000 | -2.80404 | 1.48E-99 | 19  | 350000   | -1.492092958 | 0           |
| chr9       | 44400001 | 44500000 | 5    | 14  | 44450000 | -1.28946 | 2.77E-43 | 19  | 350000   | -1.492092958 | 0           |
| chr9       | 44450001 | 44550000 | 5    | 13  | 44500000 | -1.18255 | 2.87E-38 | 19  | 350000   | -1.492092958 | 0           |
| chr9       | 44650001 | 44750000 | 6    | 14  | 44700000 | -1.02643 | 5.11E-31 | 19  | 350000   | -1.492092958 | 0           |
| chr9       | 40250001 | 40350000 | 5    | 11  | 40300000 | -0.94154 | 3.57E-27 | 18  | 3.00E+05 | -1.251495942 | 8.02E-238   |
| chr9       | 40300001 | 40400000 | 5    | 11  | 40350000 | -0.94154 | 3.57E-27 | 18  | 3.00E+05 | -1.251495942 | 8.02E-238   |
| chr15      | 30500001 | 30600000 | 2    | 14  | 30550000 | -2.61139 | 1.81E-94 | 15  | 250000   | -1.070823505 | 1.54E-156   |
| chr15      | 30550001 | 30650000 | 5    | 16  | 30600000 | -1.48211 | 3.18E-52 | 15  | 250000   | -1.070823505 | 1.54E-156   |
| chr15      | 30600001 | 30700000 | 10   | 19  | 30650000 | -0.73004 | 3.48E-18 | 15  | 250000   | -1.070823505 | 1.54E-156   |
| chr15      | 30650001 | 30750000 | 8    | 15  | 30700000 | -0.71093 | 1.98E-17 | 15  | 250000   | -1.070823505 | 1.54E-156   |
| chr15      | 30700001 | 30800000 | 7    | 13  | 30750000 | -0.69712 | 6.85E-17 | 15  | 250000   | -1.070823505 | 1.54E-156   |
| chr16      | 18300001 | 18400000 | 16   | 11  | 18350000 | 0.736531 | 1.55E-19 | 14  | 2.00E+05 | 1.026038034  | 2.05E-127   |
| chr16      | 18350001 | 18450000 | 9    | 3   | 18400000 | 1.780926 | 4.68E-73 | 14  | 2.00E+05 | 1.026038034  | 2.05E-127   |
| chr16      | 18450001 | 18550000 | 6    | 4   | 18500000 | 0.780926 | 1.60E-21 | 14  | 2.00E+05 | 1.026038034  | 2.05E-127   |



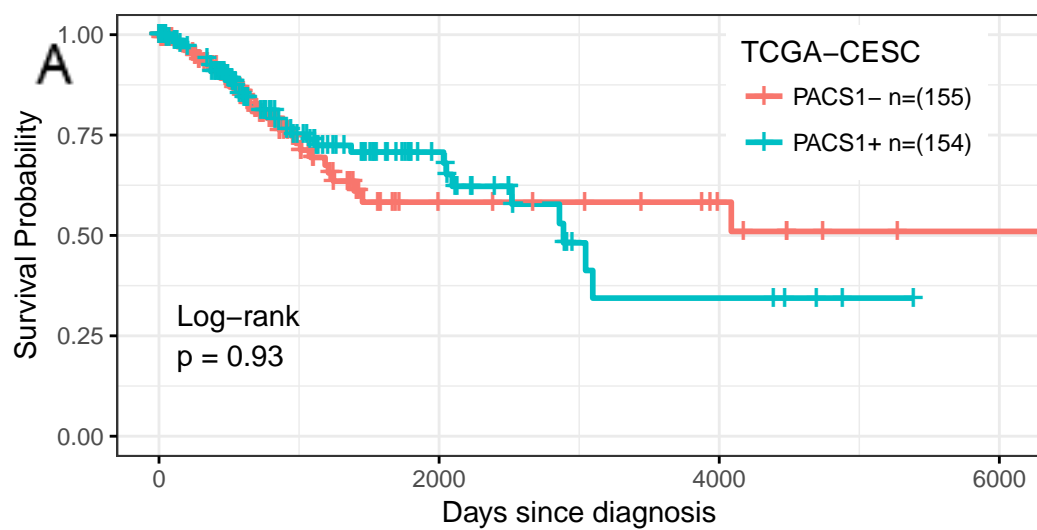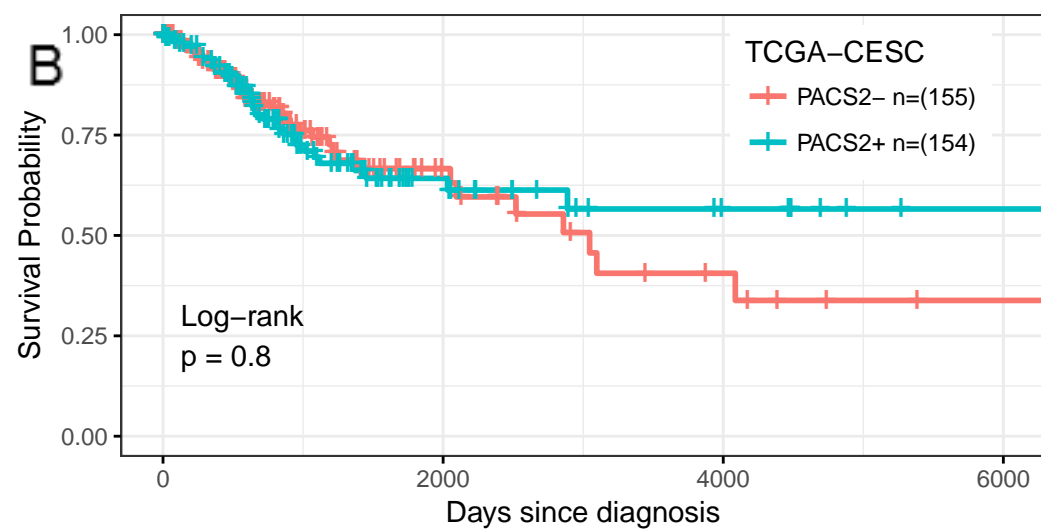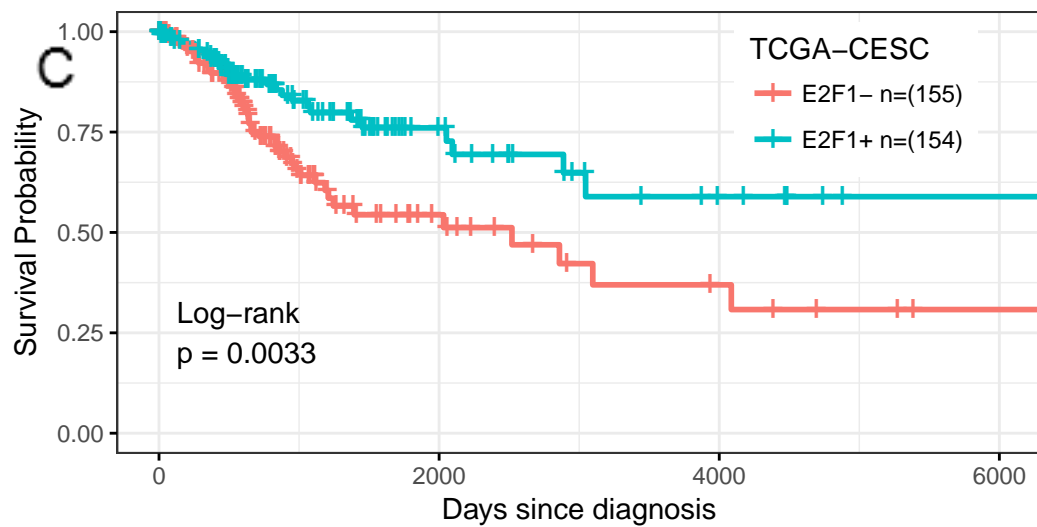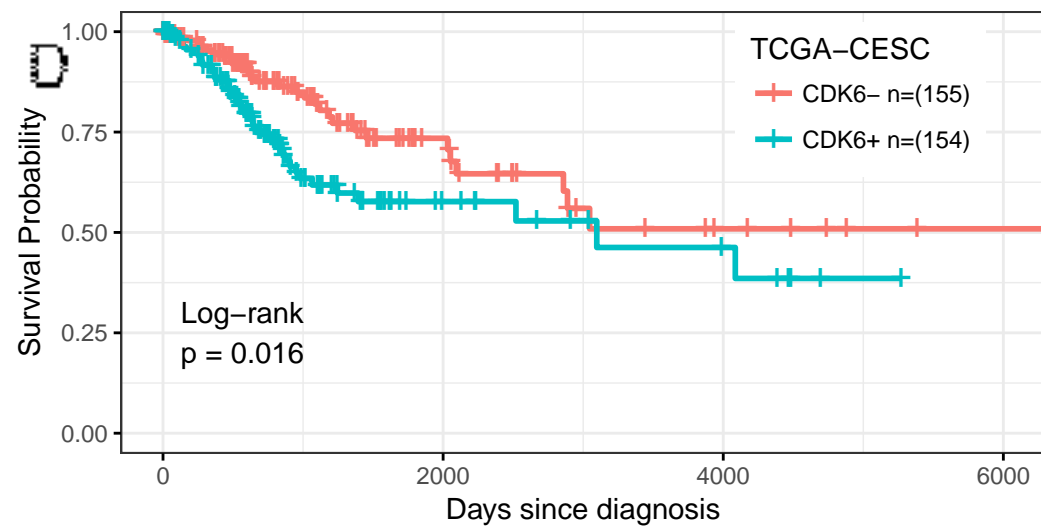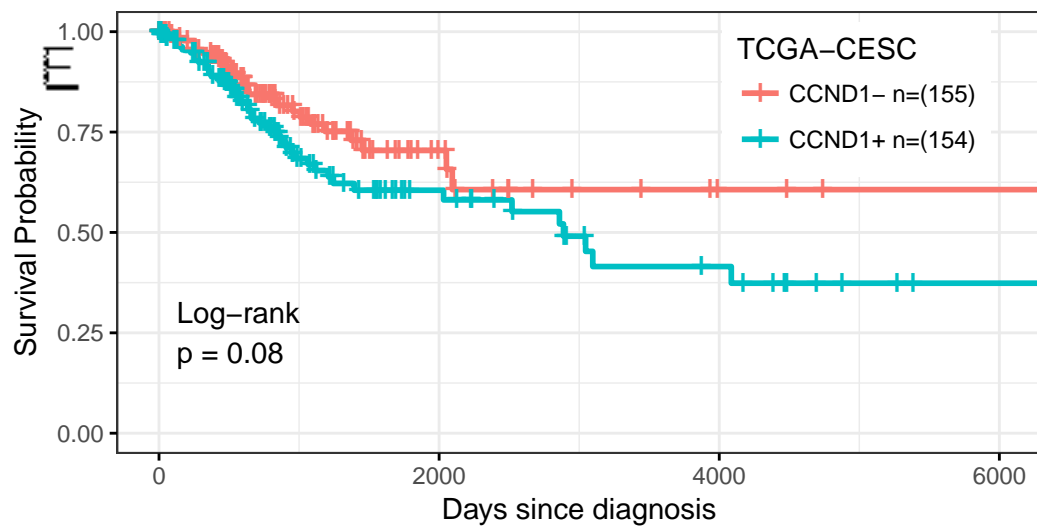

Supplement: supp_RA120.014048_160395_3_supp_602192_qh6281.pdf [file supp_RA120.014048_160395_3_supp_602192_qh6281.pdf]
