# Supplementary material
Source: PubMed Central journal article supplement (PMC7863911)
Supplement: supp_RA120.014048_160395_3_supp_602193_qh6281.pdf [file supp_RA120.014048_160395_3_supp_602193_qh6281.pdf]

| chromoson | start    | end      | test | ref | position | log2      | p.value  |           |
|-----------|----------|----------|------|-----|----------|-----------|----------|-----------|
| chr5      | 69750001 | 69850000 |      | 1   | 2        | 69800000  | -1.07237 | 8.26E-44  |
| chr5      | 69800001 | 69900000 |      | 1   | 2        | 69850000  | -1.07237 | 8.26E-44  |
| chr5      | 69850001 | 69950000 |      | 0   | 2        | 69900000  | #NAME?   | 1.59E-189 |
| chr5      | 69900001 | 70000000 |      | 1   | 2        | 69950000  | -1.07237 | 8.26E-44  |
| chr10     | 46600001 | 46700000 |      | 4   | 7        | 46650000  | -0.87973 | 6.33E-32  |
| chr10     | 46650001 | 46750000 |      | 2   | 8        | 46700000  | -2.07237 | 5.62E-105 |
| chr10     | 46700001 | 46800000 |      | 2   | 4        | 46750000  | -1.07237 | 8.26E-44  |
| chr10     | 46750001 | 46850000 |      | 1   | 3        | 46800000  | -1.65733 | 2.87E-81  |
| chr10     | 46800001 | 46900000 |      | 0   | 1        | 46850000  | #NAME?   | 1.59E-189 |
| chr10     | 51300001 | 51400000 |      | 5   | 2        | 51350000  | 1.249556 | 2.09E-53  |
| chr10     | 51350001 | 51450000 |      | 5   | 2        | 51400000  | 1.249556 | 2.09E-53  |
| chr9      | 39400001 | 39500000 |      | 0   | 2        | 39450000  | #NAME?   | 1.59E-189 |
| chr9      | 39450001 | 39550000 |      | 0   | 1        | 39500000  | #NAME?   | 1.59E-189 |
| chr9      | 39500001 | 39600000 |      | 0   | 2        | 39550000  | #NAME?   | 1.59E-189 |
| chr9      | 39550001 | 39650000 |      | 0   | 3        | 39600000  | #NAME?   | 1.59E-189 |
| chr9      | 39600001 | 39700000 |      | 0   | 1        | 39650000  | #NAME?   | 1.59E-189 |
| chr9      | 67600001 | 67700000 |      | 13  | 4        | 67650000  | 1.628068 | 2.19E-76  |
| chr9      | 67650001 | 67750000 |      | 14  | 8        | 67700000  | 0.734983 | 3.27E-23  |
| chr9      | 39950001 | 40050000 |      | 2   | 1        | 4.00E+07  | 0.927628 | 7.06E-34  |
| chr9      | 40000001 | 40100000 |      | 3   | 1        | 40050000  | 1.512591 | 1.57E-69  |
| chr9      | 39350001 | 39450000 |      | 2   | 1        | 39400000  | 0.927628 | 7.06E-34  |
| chr15     | 21200001 | 21300000 |      | 30  | 50       | 21250000  | -0.80934 | 7.76E-28  |
| chr15     | 21250001 | 21350000 |      | 10  | 23       | 21300000  | -1.27401 | 7.92E-57  |
| chr15     | 21300001 | 21400000 |      | 10  | 17       | 21350000  | -0.83791 | 1.78E-29  |
| chr15     | 21350001 | 21450000 |      | 2   | 5        | 21400000  | -1.3943  | 1.23E-64  |
| chr1      | 1.47E+08 | 1.48E+08 |      | 0   | 4        | 147500000 | #NAME?   | 1.59E-189 |
| chr1      | 1.48E+08 | 1.48E+08 |      | 0   | 3        | 147550000 | #NAME?   | 1.59E-189 |
| chr1      | 1.48E+08 | 1.48E+08 |      | 0   | 3        | 147600000 | #NAME?   | 1.59E-189 |
| chr1      | 1.48E+08 | 1.48E+08 |      | 0   | 3        | 147650000 | #NAME?   | 1.59E-189 |
| chr1      | 150001   | 250000   |      | 0   | 1        | 2.00E+05  | #NAME?   | 1.59E-189 |
| chr1      | 200001   | 300000   |      | 0   | 3        | 250000    | #NAME?   | 1.59E-189 |
| chr1      | 250001   | 350000   |      | 0   | 2        | 3.00E+05  | #NAME?   | 1.59E-189 |
| chr1      | 300001   | 400000   |      | 0   | 1        | 350000    | #NAME?   | 1.59E-189 |
| chr1      | 350001   | 450000   |      | 0   | 1        | 4.00E+05  | #NAME?   | 1.59E-189 |
| chrY      | 19000001 | 19100000 |      | 0   | 1        | 19050000  | #NAME?   | 1.59E-189 |
| chrY      | 19050001 | 19150000 |      | 0   | 3        | 19100000  | #NAME?   | 1.59E-189 |
| chrY      | 19100001 | 19200000 |      | 0   | 2        | 19150000  | #NAME?   | 1.59E-189 |
| chrY      | 19150001 | 19250000 |      | 0   | 1        | 19200000  | #NAME?   | 1.59E-189 |
| chrY      | 19200001 | 19300000 |      | 1   | 2        | 19250000  | -1.07237 | 8.26E-44  |
| chrY      | 18600001 | 18700000 |      | 0   | 1        | 18650000  | #NAME?   | 1.59E-189 |
| chrY      | 18650001 | 18750000 |      | 0   | 3        | 18700000  | #NAME?   | 1.59E-189 |
| chrY      | 18700001 | 18800000 |      | 0   | 3        | 18750000  | #NAME?   | 1.59E-189 |
| chrY      | 18750001 | 18850000 |      | 0   | 1        | 18800000  | #NAME?   | 1.59E-189 |
| chrY      | 16750001 | 16850000 |      | 0   | 2        | 16800000  | #NAME?   | 1.59E-189 |
| chrY      | 16800001 | 16900000 |      | 0   | 4        | 16850000  | #NAME?   | 1.59E-189 |
| chrY      | 16850001 | 16950000 |      | 0   | 2        | 16900000  | #NAME?   | 1.59E-189 |

|       |          |          |      |      |          |          |             |
|-------|----------|----------|------|------|----------|----------|-------------|
| chrY  | 16900001 | 17000000 | 0    | 2    | 16950000 | #NAME?   | 1.59E-189   |
| chrY  | 16950001 | 17050000 | 0    | 2    | 1.70E+07 | #NAME?   | 1.59E-189   |
| chrY  | 8950001  | 9050000  | 0    | 1    | 9.00E+06 | #NAME?   | 1.59E-189   |
| chrY  | 9000001  | 9100000  | 0    | 1    | 9050000  | #NAME?   | 1.59E-189   |
| chrY  | 9050001  | 9150000  | 0    | 2    | 9100000  | #NAME?   | 1.59E-189   |
| chrY  | 9100001  | 9200000  | 0    | 2    | 9150000  | #NAME?   | 1.59E-189   |
| chrY  | 3700001  | 3800000  | 0    | 1    | 3750000  | #NAME?   | 1.59E-189   |
| chrY  | 3750001  | 3850000  | 1    | 2    | 3800000  | -1.07237 | 8.26E-44    |
| chrY  | 3800001  | 3900000  | 1    | 2    | 3850000  | -1.07237 | 8.26E-44    |
| chrY  | 3850001  | 3950000  | 0    | 1    | 3900000  | #NAME?   | 1.59E-189   |
| chrY  | 3300001  | 3400000  | 2    | 5    | 3350000  | -1.3943  | 1.23E-64    |
| chrY  | 3350001  | 3450000  | 16   | 25   | 3400000  | -0.71623 | 1.02E-22    |
| chrY  | 3400001  | 3500000  | 15   | 22   | 3450000  | -0.62491 | 4.39E-18    |
| chrY  | 3450001  | 3550000  | 1    | 3    | 3500000  | -1.65733 | 2.87E-81    |
| chrY  | 3500001  | 3600000  | 1    | 3    | 3550000  | -1.65733 | 2.87E-81    |
| chrY  | 3550001  | 3650000  | 1    | 3    | 3600000  | -1.65733 | 2.87E-81    |
| chrY  | 14450001 | 14550000 | 2    | 1    | 14500000 | 0.927628 | 7.06E-34    |
| chrY  | 4950001  | 5050000  | 4    | 1    | 5.00E+06 | 1.927628 | 4.39E-93    |
| chrY  | 5000001  | 5100000  | 4    | 1    | 5050000  | 1.927628 | 4.39E-93    |
| chrY  | 3100001  | 3200000  | 12   | 3    | 3150000  | 1.927628 | 4.39E-93    |
| chrY  | 3150001  | 3250000  | 13   | 3    | 3200000  | 2.043105 | 5.09E-99    |
| chrY  | 3200001  | 3300000  | 2    | 1    | 3250000  | 0.927628 | 7.06E-34    |
| chr22 | 16400001 | 16500000 | 13   | 7    | 16450000 | 0.820713 | 8.26E-28    |
| chr22 | 16450001 | 16550000 | 16   | 8    | 16500000 | 0.927628 | 7.06E-34    |
| chr22 | 16500001 | 16600000 | 21   | 9    | 16550000 | 1.150021 | 2.93E-47    |
| chr22 | 16550001 | 16650000 | 17   | 8    | 16600000 | 1.015091 | 4.76E-39    |
| chr7  | 1        | 100000   | 526  | 574  | 50000    | -0.19836 | 0.002474644 |
| chr7  | 50001    | 150000   | 952  | 1076 | 1.00E+05 | -0.24902 | 0.000214467 |
| chr7  | 100001   | 200000   | 1054 | 1252 | 150000   | -0.32073 | 3.09E-06    |
| chr7  | 150001   | 250000   | 846  | 1029 | 2.00E+05 | -0.35489 | 2.99E-07    |
| chr7  | 200001   | 300000   | 468  | 565  | 250000   | -0.34411 | 6.38E-07    |
| chr7  | 250001   | 350000   | 617  | 764  | 3.00E+05 | -0.38067 | 4.50E-08    |
| chr7  | 300001   | 400000   | 966  | 1156 | 350000   | -0.33142 | 1.52E-06    |
| chr7  | 350001   | 450000   | 999  | 1168 | 4.00E+05 | -0.29786 | 1.32E-05    |
| chr7  | 400001   | 500000   | 998  | 1133 | 450000   | -0.25541 | 0.000152484 |
| chr7  | 450001   | 550000   | 1069 | 1231 | 5.00E+05 | -0.27594 | 4.85E-05    |
| chr7  | 500001   | 600000   | 1069 | 1282 | 550000   | -0.33451 | 1.23E-06    |
| chr7  | 550001   | 650000   | 1041 | 1241 | 6.00E+05 | -0.3259  | 2.20E-06    |
| chr7  | 600001   | 700000   | 999  | 1155 | 650000   | -0.28171 | 3.47E-05    |
| chr7  | 650001   | 750000   | 904  | 1013 | 7.00E+05 | -0.23661 | 0.00040725  |
| chr7  | 700001   | 800000   | 912  | 1028 | 750000   | -0.24511 | 0.000263287 |
| chr7  | 750001   | 850000   | 916  | 1026 | 8.00E+05 | -0.23598 | 0.000420387 |
| chr7  | 800001   | 900000   | 928  | 988  | 850000   | -0.16276 | 0.010494997 |
| chr7  | 850001   | 950000   | 985  | 1097 | 9.00E+05 | -0.22774 | 0.000633465 |
| chr7  | 900001   | 1000000  | 943  | 1148 | 950000   | -0.35616 | 2.73E-07    |
| chr7  | 950001   | 1050000  | 904  | 1154 | 1.00E+06 | -0.42462 | 1.39E-09    |
| chr7  | 1000001  | 1100000  | 942  | 1241 | 1050000  | -0.47008 | 2.74E-11    |

|      |         |         |      |      |          |          |             |
|------|---------|---------|------|------|----------|----------|-------------|
| chr7 | 1050001 | 1150000 | 1000 | 1215 | 1100000  | -0.35333 | 3.34E-07    |
| chr7 | 1200001 | 1300000 | 886  | 963  | 1250000  | -0.1926  | 0.00317439  |
| chr7 | 1250001 | 1350000 | 981  | 1156 | 1300000  | -0.30919 | 6.49E-06    |
| chr7 | 1300001 | 1400000 | 984  | 1161 | 1350000  | -0.31101 | 5.78E-06    |
| chr7 | 1350001 | 1450000 | 1021 | 1199 | 1400000  | -0.30422 | 8.88E-06    |
| chr7 | 1400001 | 1500000 | 1052 | 1317 | 1450000  | -0.39649 | 1.33E-08    |
| chr7 | 1450001 | 1550000 | 1054 | 1346 | 1500000  | -0.42518 | 1.32E-09    |
| chr7 | 1500001 | 1600000 | 992  | 1294 | 1550000  | -0.4558  | 9.72E-11    |
| chr7 | 1550001 | 1650000 | 959  | 1225 | 1600000  | -0.42555 | 1.28E-09    |
| chr7 | 1600001 | 1700000 | 994  | 1157 | 1650000  | -0.29144 | 1.95E-05    |
| chr7 | 1650001 | 1750000 | 1057 | 1205 | 1700000  | -0.26143 | 0.000109844 |
| chr7 | 1700001 | 1800000 | 1137 | 1248 | 1750000  | -0.20676 | 0.001702933 |
| chr7 | 1800001 | 1900000 | 743  | 822  | 1850000  | -0.21815 | 0.001005288 |
| chr7 | 1850001 | 1950000 | 789  | 975  | 1900000  | -0.37775 | 5.61E-08    |
| chr7 | 1900001 | 2000000 | 1025 | 1200 | 1950000  | -0.29978 | 1.17E-05    |
| chr7 | 1950001 | 2050000 | 1107 | 1249 | 2.00E+06 | -0.24649 | 0.000244931 |
| chr7 | 2000001 | 2100000 | 1076 | 1313 | 2050000  | -0.35956 | 2.14E-07    |
| chr7 | 2050001 | 2150000 | 1106 | 1361 | 2100000  | -0.37169 | 8.82E-08    |
| chr7 | 2100001 | 2200000 | 1102 | 1294 | 2150000  | -0.30409 | 8.95E-06    |
| chr7 | 2150001 | 2250000 | 1015 | 1113 | 2200000  | -0.20535 | 0.001814965 |
| chr7 | 2200001 | 2300000 | 1013 | 1101 | 2250000  | -0.19255 | 0.003181016 |
| chr7 | 2250001 | 2350000 | 942  | 1014 | 2300000  | -0.17863 | 0.005666817 |
| chr7 | 2450001 | 2550000 | 908  | 1034 | 2500000  | -0.25984 | 0.000119828 |
| chr7 | 2500001 | 2600000 | 953  | 1133 | 2550000  | -0.32197 | 2.85E-06    |
| chr7 | 2550001 | 2650000 | 927  | 1057 | 2600000  | -0.26171 | 0.000108186 |
| chr7 | 2600001 | 2700000 | 984  | 1224 | 2650000  | -0.38725 | 2.73E-08    |
| chr7 | 2650001 | 2750000 | 1001 | 1193 | 2700000  | -0.32552 | 2.25E-06    |
| chr7 | 2700001 | 2800000 | 906  | 988  | 2750000  | -0.19737 | 0.002583739 |
| chr7 | 3050001 | 3150000 | 903  | 943  | 3100000  | -0.1349  | 0.027793065 |
| chr7 | 3100001 | 3200000 | 891  | 923  | 3150000  | -0.12328 | 0.040090668 |
| chr7 | 3500001 | 3600000 | 1105 | 969  | 3550000  | 0.117106 | 0.04857432  |
| chr7 | 4100001 | 4200000 | 1028 | 1073 | 4150000  | -0.13418 | 0.028452052 |
| chr7 | 4150001 | 4250000 | 1024 | 1158 | 4200000  | -0.24979 | 0.000205858 |
| chr7 | 4200001 | 4300000 | 1027 | 1085 | 4250000  | -0.15163 | 0.015741882 |
| chr7 | 4250001 | 4350000 | 957  | 1005 | 4300000  | -0.14298 | 0.021254251 |
| chr7 | 4500001 | 4600000 | 759  | 852  | 4550000  | -0.23913 | 0.000358412 |
| chr7 | 4550001 | 4650000 | 686  | 735  | 4600000  | -0.17191 | 0.007397339 |
| chr7 | 4750001 | 4850000 | 999  | 1076 | 4800000  | -0.17949 | 0.005473097 |
| chr7 | 4800001 | 4900000 | 1001 | 1106 | 4850000  | -0.21628 | 0.00109773  |
| chr7 | 5250001 | 5350000 | 585  | 641  | 5300000  | -0.20426 | 0.001905683 |
| chr7 | 5300001 | 5400000 | 556  | 628  | 5350000  | -0.24805 | 0.000225658 |
| chr7 | 5450001 | 5550000 | 857  | 970  | 5500000  | -0.25106 | 0.000192446 |
| chr7 | 5500001 | 5600000 | 828  | 915  | 5550000  | -0.21651 | 0.001085853 |
| chr7 | 5950001 | 6050000 | 149  | 126  | 6.00E+06 | 0.169517 | 0.008274492 |
| chr7 | 6300001 | 6400000 | 760  | 646  | 6350000  | 0.162093 | 0.01094313  |
| chr7 | 6350001 | 6450000 | 738  | 645  | 6400000  | 0.12195  | 0.042067692 |
| chr7 | 6450001 | 6550000 | 791  | 825  | 6500000  | -0.13309 | 0.029474824 |

|      |          |          |      |      |          |          |             |
|------|----------|----------|------|------|----------|----------|-------------|
| chr7 | 6600001  | 6700000  | 861  | 960  | 6650000  | -0.22939 | 0.000584025 |
| chr7 | 6650001  | 6750000  | 909  | 1025 | 6700000  | -0.24564 | 0.000256014 |
| chr7 | 6700001  | 6800000  | 558  | 583  | 6750000  | -0.1356  | 0.027167259 |
| chr7 | 6800001  | 6900000  | 77   | 87   | 6850000  | -0.24853 | 0.000220056 |
| chr7 | 6900001  | 7000000  | 147  | 156  | 6950000  | -0.1581  | 0.012468616 |
| chr7 | 6950001  | 7050000  | 154  | 192  | 7.00E+06 | -0.39055 | 2.12E-08    |
| chr7 | 7800001  | 7900000  | 1019 | 886  | 7850000  | 0.129404 | 0.033454273 |
| chr7 | 8000001  | 8100000  | 1059 | 902  | 8050000  | 0.159131 | 0.012201716 |
| chr7 | 8150001  | 8250000  | 1010 | 1088 | 8200000  | -0.1797  | 0.005428656 |
| chr7 | 8200001  | 8300000  | 988  | 1026 | 8250000  | -0.12682 | 0.03594536  |
| chr7 | 8800001  | 8900000  | 1059 | 919  | 8850000  | 0.132194 | 0.030629814 |
| chr7 | 9200001  | 9300000  | 1006 | 820  | 9250000  | 0.222563 | 0.000848746 |
| chr7 | 9250001  | 9350000  | 1047 | 845  | 9300000  | 0.236866 | 0.0004223   |
| chr7 | 9300001  | 9400000  | 1000 | 870  | 9350000  | 0.128541 | 0.034369937 |
| chr7 | 9350001  | 9450000  | 944  | 807  | 9400000  | 0.153846 | 0.014761785 |
| chr7 | 9400001  | 9500000  | 881  | 727  | 9450000  | 0.204815 | 0.001920457 |
| chr7 | 9450001  | 9550000  | 857  | 738  | 9500000  | 0.143303 | 0.021276025 |
| chr7 | 9650001  | 9750000  | 984  | 829  | 9700000  | 0.174914 | 0.006712039 |
| chr7 | 9700001  | 9800000  | 937  | 800  | 9750000  | 0.155677 | 0.013826799 |
| chr7 | 9900001  | 10000000 | 1052 | 900  | 9950000  | 0.152766 | 0.015338734 |
| chr7 | 9950001  | 10050000 | 1059 | 928  | 1.00E+07 | 0.118134 | 0.047129718 |
| chr7 | 10100001 | 10200000 | 1108 | 967  | 10150000 | 0.123998 | 0.039538017 |
| chr7 | 10800001 | 10900000 | 940  | 808  | 10850000 | 0.145934 | 0.019456149 |
| chr7 | 10850001 | 10950000 | 958  | 823  | 10900000 | 0.146761 | 0.01891177  |
| chr7 | 11150001 | 11250000 | 1027 | 890  | 11200000 | 0.134187 | 0.028736089 |
| chr7 | 11600001 | 11700000 | 1034 | 905  | 11650000 | 0.119875 | 0.044762894 |
| chr7 | 11650001 | 11750000 | 1065 | 917  | 11700000 | 0.143488 | 0.021143214 |
| chr7 | 11700001 | 11800000 | 1059 | 927  | 11750000 | 0.11969  | 0.045009988 |
| chr7 | 11750001 | 11850000 | 1056 | 914  | 11800000 | 0.135972 | 0.02712417  |
| chr7 | 11800001 | 11900000 | 1061 | 889  | 11850000 | 0.182798 | 0.004899525 |
| chr7 | 11850001 | 11950000 | 1086 | 935  | 11900000 | 0.143614 | 0.021053328 |
| chr7 | 12350001 | 12450000 | 1048 | 880  | 12400000 | 0.179692 | 0.005553637 |
| chr7 | 12400001 | 12500000 | 1023 | 849  | 12450000 | 0.196598 | 0.00275109  |
| chr7 | 12550001 | 12650000 | 977  | 855  | 12600000 | 0.120062 | 0.044513569 |
| chr7 | 12850001 | 12950000 | 956  | 827  | 12900000 | 0.136752 | 0.0264443   |
| chr7 | 12900001 | 13000000 | 1008 | 818  | 12950000 | 0.228951 | 0.000624153 |
| chr7 | 12950001 | 13050000 | 998  | 830  | 1.30E+07 | 0.193557 | 0.00313315  |
| chr7 | 13100001 | 13200000 | 854  | 747  | 13150000 | 0.120756 | 0.043601641 |
| chr7 | 13150001 | 13250000 | 925  | 810  | 13200000 | 0.11916  | 0.045723278 |
| chr7 | 13350001 | 13450000 | 991  | 853  | 13400000 | 0.143968 | 0.020802972 |
| chr7 | 13650001 | 13750000 | 976  | 844  | 13700000 | 0.137266 | 0.026003143 |
| chr7 | 13800001 | 13900000 | 876  | 768  | 13850000 | 0.117453 | 0.048083151 |
| chr7 | 13850001 | 13950000 | 996  | 856  | 13900000 | 0.146163 | 0.019303908 |
| chr7 | 13900001 | 14000000 | 1028 | 887  | 13950000 | 0.140462 | 0.02340066  |
| chr7 | 14350001 | 14450000 | 957  | 827  | 14400000 | 0.13826  | 0.025169363 |
| chr7 | 14400001 | 14500000 | 1060 | 887  | 14450000 | 0.184686 | 0.004536273 |
| chr7 | 14450001 | 14550000 | 1022 | 854  | 14500000 | 0.186715 | 0.004173139 |

|      |          |          |      |      |          |          |             |
|------|----------|----------|------|------|----------|----------|-------------|
| chr7 | 14650001 | 14750000 | 937  | 811  | 14700000 | 0.135975 | 0.027121201 |
| chr7 | 14700001 | 14800000 | 1002 | 866  | 14750000 | 0.138072 | 0.025325414 |
| chr7 | 14950001 | 15050000 | 1051 | 913  | 1.50E+07 | 0.130704 | 0.03211223  |
| chr7 | 15000001 | 15100000 | 1040 | 875  | 15050000 | 0.176857 | 0.006217396 |
| chr7 | 15200001 | 15300000 | 1128 | 910  | 15250000 | 0.237457 | 0.000409992 |
| chr7 | 15250001 | 15350000 | 1078 | 900  | 15300000 | 0.187989 | 0.003958836 |
| chr7 | 15300001 | 15400000 | 1018 | 851  | 15350000 | 0.186135 | 0.004274306 |
| chr7 | 15350001 | 15450000 | 984  | 813  | 15400000 | 0.203031 | 0.00207838  |
| chr7 | 15600001 | 15700000 | 1064 | 896  | 15650000 | 0.175556 | 0.006544999 |
| chr7 | 15800001 | 15900000 | 1046 | 904  | 15850000 | 0.138116 | 0.025288327 |
| chr7 | 15850001 | 15950000 | 1088 | 918  | 15900000 | 0.172741 | 0.0073067   |
| chr7 | 16450001 | 16550000 | 1109 | 939  | 16500000 | 0.167691 | 0.008871444 |
| chr7 | 17050001 | 17150000 | 1009 | 874  | 17100000 | 0.134849 | 0.028129087 |
| chr7 | 17100001 | 17200000 | 1078 | 933  | 17150000 | 0.136036 | 0.02706743  |
| chr7 | 17300001 | 17400000 | 1027 | 858  | 17350000 | 0.187015 | 0.004121821 |
| chr7 | 17500001 | 17600000 | 1086 | 947  | 17550000 | 0.125216 | 0.038094049 |
| chr7 | 17550001 | 17650000 | 1019 | 894  | 17600000 | 0.116436 | 0.049535442 |
| chr7 | 18000001 | 18100000 | 856  | 884  | 18050000 | -0.11881 | 0.045867527 |
| chr7 | 18400001 | 18500000 | 1073 | 932  | 18450000 | 0.130876 | 0.031937802 |
| chr7 | 18550001 | 18650000 | 1103 | 922  | 18600000 | 0.186222 | 0.004258904 |
| chr7 | 18850001 | 18950000 | 1096 | 959  | 18900000 | 0.120273 | 0.044234652 |
| chr7 | 18950001 | 19050000 | 986  | 863  | 1.90E+07 | 0.119855 | 0.044788736 |
| chr7 | 19000001 | 19100000 | 882  | 759  | 19050000 | 0.144307 | 0.020564939 |
| chr7 | 19200001 | 19300000 | 880  | 695  | 19250000 | 0.268119 | 8.12E-05    |
| chr7 | 19250001 | 19350000 | 994  | 803  | 19300000 | 0.235474 | 0.000452699 |
| chr7 | 19300001 | 19400000 | 1082 | 937  | 19350000 | 0.135208 | 0.02780484  |
| chr7 | 19350001 | 19450000 | 1107 | 965  | 19400000 | 0.125683 | 0.037552305 |
| chr7 | 19850001 | 19950000 | 842  | 737  | 19900000 | 0.119784 | 0.044884039 |
| chr7 | 20250001 | 20350000 | 1032 | 885  | 20300000 | 0.149322 | 0.01730951  |
| chr7 | 20300001 | 20400000 | 1066 | 907  | 20350000 | 0.160661 | 0.011536818 |
| chr7 | 20750001 | 20850000 | 832  | 888  | 20800000 | -0.16635 | 0.00916533  |
| chr7 | 20900001 | 21000000 | 907  | 786  | 20950000 | 0.134201 | 0.028722865 |
| chr7 | 21250001 | 21350000 | 1012 | 881  | 21300000 | 0.127624 | 0.035366095 |
| chr7 | 21300001 | 21400000 | 1006 | 856  | 21350000 | 0.160576 | 0.011573078 |
| chr7 | 21350001 | 21450000 | 979  | 842  | 21400000 | 0.145117 | 0.020006383 |
| chr7 | 21400001 | 21500000 | 997  | 867  | 21450000 | 0.12919  | 0.033679429 |
| chr7 | 22050001 | 22150000 | 988  | 1022 | 22100000 | -0.12118 | 0.042717428 |
| chr7 | 22500001 | 22600000 | 547  | 578  | 22550000 | -0.1519  | 0.015591926 |
| chr7 | 22650001 | 22750000 | 1067 | 928  | 22700000 | 0.128992 | 0.033888975 |
| chr7 | 22850001 | 22950000 | 977  | 832  | 22900000 | 0.159403 | 0.012081206 |
| chr7 | 23300001 | 23400000 | 941  | 815  | 23350000 | 0.135023 | 0.027971639 |
| chr7 | 23950001 | 24050000 | 861  | 890  | 2.40E+07 | -0.12016 | 0.044047401 |
| chr7 | 24450001 | 24550000 | 1056 | 915  | 24500000 | 0.134394 | 0.02854491  |
| chr7 | 24700001 | 24800000 | 991  | 1037 | 24750000 | -0.13783 | 0.02525049  |
| chr7 | 26150001 | 26250000 | 856  | 888  | 26200000 | -0.12532 | 0.037654219 |
| chr7 | 26600001 | 26700000 | 1021 | 1118 | 26650000 | -0.20331 | 0.001988433 |
| chr7 | 26850001 | 26950000 | 936  | 815  | 26900000 | 0.127337 | 0.03568248  |

|      |          |          |      |      |          |          |             |
|------|----------|----------|------|------|----------|----------|-------------|
| chr7 | 26900001 | 27000000 | 957  | 806  | 26950000 | 0.175367 | 0.006593692 |
| chr7 | 26950001 | 27050000 | 864  | 731  | 2.70E+07 | 0.168788 | 0.008508294 |
| chr7 | 27050001 | 27150000 | 845  | 913  | 27100000 | -0.18404 | 0.004547391 |
| chr7 | 27100001 | 27200000 | 1063 | 1146 | 27150000 | -0.18084 | 0.005183089 |
| chr7 | 27150001 | 27250000 | 1079 | 1172 | 27200000 | -0.19165 | 0.003305822 |
| chr7 | 27200001 | 27300000 | 1041 | 1112 | 27250000 | -0.16756 | 0.008751544 |
| chr7 | 27750001 | 27850000 | 1001 | 869  | 27800000 | 0.131642 | 0.031172194 |
| chr7 | 27800001 | 27900000 | 1018 | 861  | 27850000 | 0.169281 | 0.008349643 |
| chr7 | 28700001 | 28800000 | 1020 | 894  | 28750000 | 0.117851 | 0.04752453  |
| chr7 | 28850001 | 28950000 | 1073 | 941  | 28900000 | 0.117012 | 0.048708658 |
| chr7 | 29200001 | 29300000 | 1032 | 885  | 29250000 | 0.149322 | 0.01730951  |
| chr7 | 29700001 | 29800000 | 350  | 297  | 29750000 | 0.16452  | 0.009997994 |
| chr7 | 29750001 | 29850000 | 646  | 667  | 29800000 | -0.11852 | 0.046254745 |
| chr7 | 29800001 | 29900000 | 909  | 983  | 29850000 | -0.18528 | 0.004318959 |
| chr7 | 30100001 | 30200000 | 957  | 999  | 30150000 | -0.13434 | 0.028308622 |
| chr7 | 30150001 | 30250000 | 1028 | 1091 | 30200000 | -0.15818 | 0.012431721 |
| chr7 | 30800001 | 30900000 | 1040 | 1072 | 30850000 | -0.11609 | 0.04969099  |
| chr7 | 30850001 | 30950000 | 1084 | 1217 | 30900000 | -0.23934 | 0.000354574 |
| chr7 | 30900001 | 31000000 | 1141 | 1225 | 30950000 | -0.17485 | 0.006588216 |
| chr7 | 30950001 | 31050000 | 1102 | 1158 | 3.10E+07 | -0.14388 | 0.020609046 |
| chr7 | 31000001 | 31100000 | 1075 | 1237 | 31050000 | -0.27488 | 5.16E-05    |
| chr7 | 31050001 | 31150000 | 1128 | 1304 | 31100000 | -0.28155 | 3.50E-05    |
| chr7 | 31100001 | 31200000 | 1041 | 1125 | 31150000 | -0.18433 | 0.004493087 |
| chr7 | 31500001 | 31600000 | 980  | 858  | 31550000 | 0.119432 | 0.045355137 |
| chr7 | 32100001 | 32200000 | 937  | 966  | 32150000 | -0.11635 | 0.049324493 |
| chr7 | 32150001 | 32250000 | 949  | 999  | 32200000 | -0.14645 | 0.018872191 |
| chr7 | 32550001 | 32650000 | 876  | 734  | 32600000 | 0.182779 | 0.004903212 |
| chr7 | 32750001 | 32850000 | 349  | 301  | 32800000 | 0.141092 | 0.022915053 |
| chr7 | 33250001 | 33350000 | 973  | 849  | 33300000 | 0.124303 | 0.039172013 |
| chr7 | 33550001 | 33650000 | 971  | 822  | 33600000 | 0.167961 | 0.008780671 |
| chr7 | 33600001 | 33700000 | 1044 | 905  | 33650000 | 0.13376  | 0.029133285 |
| chr7 | 33700001 | 33800000 | 1028 | 1064 | 33750000 | -0.12203 | 0.041639799 |
| chr7 | 34400001 | 34500000 | 968  | 844  | 34450000 | 0.125392 | 0.037888638 |
| chr7 | 34450001 | 34550000 | 936  | 813  | 34500000 | 0.130881 | 0.031932791 |
| chr7 | 34500001 | 34600000 | 955  | 803  | 34550000 | 0.177729 | 0.006006038 |
| chr7 | 34550001 | 34650000 | 928  | 804  | 34600000 | 0.134558 | 0.028395187 |
| chr7 | 34900001 | 35000000 | 473  | 503  | 34950000 | -0.16109 | 0.011168165 |
| chr7 | 35650001 | 35750000 | 899  | 771  | 35700000 | 0.149218 | 0.017371859 |
| chr7 | 35850001 | 35950000 | 825  | 705  | 35900000 | 0.154399 | 0.014473956 |
| chr7 | 35950001 | 36050000 | 520  | 450  | 3.60E+07 | 0.136215 | 0.026910807 |
| chr7 | 38250001 | 38350000 | 732  | 794  | 38300000 | -0.18967 | 0.003595553 |
| chr7 | 38300001 | 38400000 | 747  | 774  | 38350000 | -0.1236  | 0.039700768 |
| chr7 | 38450001 | 38550000 | 1123 | 977  | 38500000 | 0.128556 | 0.034354093 |
| chr7 | 39050001 | 39150000 | 1015 | 874  | 39100000 | 0.143403 | 0.021204193 |
| chr7 | 39750001 | 39850000 | 533  | 570  | 39800000 | -0.1692  | 0.008217308 |
| chr7 | 39900001 | 40000000 | 710  | 752  | 39950000 | -0.15529 | 0.013812504 |
| chr7 | 40000001 | 40100000 | 873  | 722  | 40050000 | 0.201611 | 0.002212472 |

|      |          |          |      |      |          |          |             |
|------|----------|----------|------|------|----------|----------|-------------|
| chr7 | 40050001 | 40150000 | 890  | 760  | 40100000 | 0.155434 | 0.013947933 |
| chr7 | 40450001 | 40550000 | 987  | 1020 | 40500000 | -0.11982 | 0.044504594 |
| chr7 | 40500001 | 40600000 | 1024 | 1076 | 40550000 | -0.14383 | 0.020643263 |
| chr7 | 40800001 | 40900000 | 1094 | 937  | 40850000 | 0.15112  | 0.016255066 |
| chr7 | 41100001 | 41200000 | 1129 | 983  | 41150000 | 0.12741  | 0.03560099  |
| chr7 | 41150001 | 41250000 | 1121 | 982  | 41200000 | 0.11862  | 0.046459683 |
| chr7 | 42200001 | 42300000 | 1049 | 904  | 42250000 | 0.142248 | 0.02204486  |
| chr7 | 42250001 | 42350000 | 1111 | 970  | 42300000 | 0.12343  | 0.040226596 |
| chr7 | 42600001 | 42700000 | 1027 | 888  | 42650000 | 0.137433 | 0.025861848 |
| chr7 | 43300001 | 43400000 | 972  | 1004 | 43350000 | -0.1191  | 0.045465993 |
| chr7 | 43450001 | 43550000 | 977  | 1025 | 43500000 | -0.14157 | 0.02229291  |
| chr7 | 44000001 | 44100000 | 251  | 304  | 44050000 | -0.34876 | 4.61E-07    |
| chr7 | 44050001 | 44150000 | 753  | 799  | 44100000 | -0.15792 | 0.012552927 |
| chr7 | 44100001 | 44200000 | 1061 | 1110 | 44150000 | -0.13751 | 0.02552187  |
| chr7 | 44150001 | 44250000 | 1020 | 1099 | 44200000 | -0.17999 | 0.005363396 |
| chr7 | 44200001 | 44300000 | 1086 | 1155 | 44250000 | -0.16124 | 0.011105906 |
| chr7 | 44250001 | 44350000 | 1189 | 1233 | 44300000 | -0.1248  | 0.038268013 |
| chr7 | 44350001 | 44450000 | 1049 | 1126 | 44400000 | -0.17456 | 0.006664407 |
| chr7 | 44400001 | 44500000 | 964  | 1067 | 44450000 | -0.21883 | 0.000973482 |
| chr7 | 44450001 | 44550000 | 908  | 955  | 44500000 | -0.14518 | 0.019714458 |
| chr7 | 44650001 | 44750000 | 913  | 947  | 44700000 | -0.12512 | 0.037886379 |
| chr7 | 44700001 | 44800000 | 859  | 887  | 44750000 | -0.11865 | 0.046085597 |
| chr7 | 44800001 | 44900000 | 761  | 824  | 44850000 | -0.18712 | 0.004001349 |
| chr7 | 44850001 | 44950000 | 775  | 816  | 44900000 | -0.14674 | 0.018679913 |
| chr7 | 45050001 | 45150000 | 984  | 1043 | 45100000 | -0.15638 | 0.013275639 |
| chr7 | 45100001 | 45200000 | 1067 | 1142 | 45150000 | -0.17037 | 0.007852011 |
| chr7 | 45150001 | 45250000 | 1084 | 1138 | 45200000 | -0.14251 | 0.021594692 |
| chr7 | 45200001 | 45300000 | 1079 | 1122 | 45250000 | -0.12875 | 0.033839301 |
| chr7 | 45550001 | 45650000 | 1025 | 1073 | 45600000 | -0.1384  | 0.024781085 |
| chr7 | 45600001 | 45700000 | 1061 | 1152 | 45650000 | -0.19109 | 0.003385694 |
| chr7 | 45650001 | 45750000 | 1028 | 1101 | 45700000 | -0.17135 | 0.007561071 |
| chr7 | 45800001 | 45900000 | 103  | 109  | 45850000 | -0.15406 | 0.014437587 |
| chr7 | 46250001 | 46350000 | 1123 | 978  | 46300000 | 0.12708  | 0.035967774 |
| chr7 | 46600001 | 46700000 | 941  | 982  | 46650000 | -0.1339  | 0.028712509 |
| chr7 | 46950001 | 47050000 | 1073 | 909  | 4.70E+07 | 0.166926 | 0.009132347 |
| chr7 | 47200001 | 47300000 | 986  | 1055 | 47250000 | -0.16996 | 0.007980487 |
| chr7 | 47250001 | 47350000 | 1057 | 1102 | 47300000 | -0.13252 | 0.030017695 |
| chr7 | 47300001 | 47400000 | 1036 | 1145 | 47350000 | -0.2167  | 0.00107657  |
| chr7 | 47350001 | 47450000 | 1047 | 1165 | 47400000 | -0.22644 | 0.000675012 |
| chr7 | 47700001 | 47800000 | 903  | 960  | 47750000 | -0.16068 | 0.011339198 |
| chr7 | 47950001 | 48050000 | 946  | 982  | 4.80E+07 | -0.12625 | 0.036581806 |
| chr7 | 48000001 | 48100000 | 1000 | 1034 | 48050000 | -0.12061 | 0.043464387 |
| chr7 | 48150001 | 48250000 | 895  | 923  | 48200000 | -0.11681 | 0.048650445 |
| chr7 | 48400001 | 48500000 | 1110 | 959  | 48450000 | 0.138585 | 0.02490123  |
| chr7 | 49200001 | 49300000 | 1035 | 890  | 49250000 | 0.145382 | 0.019826509 |
| chr7 | 49250001 | 49350000 | 1037 | 869  | 49300000 | 0.182616 | 0.004935767 |
| chr7 | 49300001 | 49400000 | 1057 | 883  | 49350000 | 0.187118 | 0.00410423  |

|      |          |          |      |      |          |          |             |
|------|----------|----------|------|------|----------|----------|-------------|
| chr7 | 49350001 | 49450000 | 1113 | 909  | 49400000 | 0.21973  | 0.000970482 |
| chr7 | 49400001 | 49500000 | 1060 | 902  | 49450000 | 0.160493 | 0.011608285 |
| chr7 | 49800001 | 49900000 | 1028 | 1072 | 49850000 | -0.13284 | 0.029714631 |
| chr7 | 49950001 | 50050000 | 941  | 970  | 5.00E+07 | -0.11616 | 0.04959124  |
| chr7 | 50300001 | 50400000 | 818  | 706  | 50350000 | 0.140061 | 0.023715079 |
| chr7 | 50450001 | 50550000 | 1058 | 1103 | 50500000 | -0.13246 | 0.0300714   |
| chr7 | 50850001 | 50950000 | 1046 | 1103 | 50900000 | -0.14892 | 0.017317519 |
| chr7 | 50950001 | 51050000 | 971  | 834  | 5.10E+07 | 0.147052 | 0.01872371  |
| chr7 | 51050001 | 51150000 | 1069 | 1123 | 51100000 | -0.14347 | 0.020902344 |
| chr7 | 51450001 | 51550000 | 573  | 596  | 51500000 | -0.12915 | 0.033416452 |
| chr7 | 51500001 | 51600000 | 879  | 968  | 51550000 | -0.21152 | 0.00137025  |
| chr7 | 52100001 | 52200000 | 1042 | 872  | 52150000 | 0.184583 | 0.004555444 |
| chr7 | 52550001 | 52650000 | 1043 | 881  | 52600000 | 0.171153 | 0.007769908 |
| chr7 | 52600001 | 52700000 | 1034 | 891  | 52650000 | 0.142367 | 0.021957038 |
| chr7 | 52700001 | 52800000 | 1014 | 887  | 52750000 | 0.12068  | 0.043701048 |
| chr7 | 52750001 | 52850000 | 1093 | 946  | 52800000 | 0.13601  | 0.02709109  |
| chr7 | 52800001 | 52900000 | 1094 | 929  | 52850000 | 0.16349  | 0.010389947 |
| chr7 | 52850001 | 52950000 | 1076 | 925  | 52900000 | 0.145781 | 0.01955799  |
| chr7 | 52950001 | 53050000 | 1049 | 876  | 5.30E+07 | 0.18764  | 0.004016474 |
| chr7 | 53000001 | 53100000 | 943  | 826  | 53050000 | 0.118744 | 0.046288901 |
| chr7 | 53650001 | 53750000 | 1059 | 926  | 53700000 | 0.121247 | 0.042965791 |
| chr7 | 53700001 | 53800000 | 1065 | 874  | 53750000 | 0.212776 | 0.001340518 |
| chr7 | 53750001 | 53850000 | 1080 | 873  | 53800000 | 0.234606 | 0.00047267  |
| chr7 | 53800001 | 53900000 | 1018 | 878  | 53850000 | 0.141073 | 0.022929461 |
| chr7 | 54350001 | 54450000 | 921  | 799  | 54400000 | 0.132634 | 0.030203231 |
| chr7 | 54400001 | 54500000 | 1053 | 880  | 54450000 | 0.186558 | 0.004200314 |
| chr7 | 54450001 | 54550000 | 955  | 813  | 54500000 | 0.159874 | 0.011875098 |
| chr7 | 54950001 | 55050000 | 973  | 853  | 5.50E+07 | 0.117522 | 0.047985183 |
| chr7 | 55200001 | 55300000 | 1021 | 1127 | 55250000 | -0.21488 | 0.001172376 |
| chr7 | 55250001 | 55350000 | 1007 | 1061 | 55300000 | -0.14773 | 0.018050619 |
| chr7 | 56350001 | 56450000 | 289  | 322  | 56400000 | -0.22836 | 0.000614388 |
| chr7 | 56400001 | 56500000 | 118  | 154  | 56450000 | -0.45652 | 9.13E-11    |
| chr7 | 56850001 | 56950000 | 52   | 39   | 56900000 | 0.342666 | 8.12E-07    |
| chr7 | 56900001 | 57000000 | 30   | 25   | 56950000 | 0.190663 | 0.003540577 |
| chr7 | 57000001 | 57100000 | 15   | 12   | 57050000 | 0.249556 | 0.000220671 |
| chr7 | 57350001 | 57450000 | 766  | 812  | 57400000 | -0.15651 | 0.013214863 |
| chr7 | 57450001 | 57550000 | 757  | 790  | 57500000 | -0.13393 | 0.028683683 |
| chr7 | 57500001 | 57600000 | 675  | 775  | 57550000 | -0.27168 | 6.19E-05    |
| chr7 | 57550001 | 57650000 | 559  | 580  | 57600000 | -0.12558 | 0.037358044 |
| chr7 | 58050001 | 58150000 | 29   | 36   | 58100000 | -0.38432 | 3.42E-08    |
| chr7 | 61200001 | 61300000 | 21   | 24   | 61250000 | -0.26502 | 9.01E-05    |
| chr7 | 61250001 | 61350000 | 4    | 6    | 61300000 | -0.65733 | 1.11E-19    |
| chr7 | 61300001 | 61400000 | 3    | 5    | 61350000 | -0.80934 | 7.76E-28    |
| chr7 | 61400001 | 61500000 | 5    | 3    | 61450000 | 0.664594 | 1.17E-19    |
| chr7 | 61450001 | 61550000 | 409  | 436  | 61500000 | -0.1646  | 0.009793402 |
| chr7 | 61550001 | 61650000 | 173  | 148  | 61600000 | 0.152803 | 0.015318624 |
| chr7 | 61600001 | 61700000 | 28   | 24   | 61650000 | 0.150021 | 0.016892961 |



|      |          |          |      |      |          |          |             |
|------|----------|----------|------|------|----------|----------|-------------|
| chr7 | 61700001 | 61800000 | 1024 | 1070 | 61750000 | -0.13577 | 0.027021864 |
| chr7 | 61750001 | 61850000 | 996  | 1051 | 61800000 | -0.14992 | 0.016723706 |
| chr7 | 62250001 | 62350000 | 787  | 687  | 62300000 | 0.123682 | 0.039920622 |
| chr7 | 62550001 | 62650000 | 630  | 669  | 62600000 | -0.15903 | 0.01205292  |
| chr7 | 62600001 | 62700000 | 529  | 555  | 62650000 | -0.14159 | 0.022272938 |
| chr7 | 62700001 | 62800000 | 69   | 53   | 62750000 | 0.308232 | 7.66E-06    |
| chr7 | 62750001 | 62850000 | 158  | 166  | 62800000 | -0.14363 | 0.02078699  |
| chr7 | 62800001 | 62900000 | 154  | 165  | 62850000 | -0.17191 | 0.007397339 |
| chr7 | 62850001 | 62950000 | 43   | 31   | 62900000 | 0.399697 | 1.29E-08    |
| chr7 | 62900001 | 63000000 | 78   | 61   | 62950000 | 0.282293 | 3.64E-05    |
| chr7 | 63000001 | 63100000 | 29   | 32   | 63050000 | -0.21439 | 0.001199247 |
| chr7 | 63050001 | 63150000 | 20   | 16   | 63100000 | 0.249556 | 0.000220671 |
| chr7 | 63100001 | 63200000 | 35   | 21   | 63150000 | 0.664594 | 1.17E-19    |
| chr7 | 63150001 | 63250000 | 45   | 36   | 63200000 | 0.249556 | 0.000220671 |
| chr7 | 63200001 | 63300000 | 113  | 121  | 63250000 | -0.17106 | 0.007646864 |
| chr7 | 63250001 | 63350000 | 364  | 392  | 63300000 | -0.17929 | 0.00551887  |
| chr7 | 63300001 | 63400000 | 641  | 663  | 63350000 | -0.12106 | 0.042882154 |
| chr7 | 63450001 | 63550000 | 664  | 536  | 63500000 | 0.236578 | 0.000428427 |
| chr7 | 64400001 | 64500000 | 628  | 655  | 64450000 | -0.1331  | 0.029461611 |
| chr7 | 64450001 | 64550000 | 318  | 353  | 64500000 | -0.22301 | 0.000796981 |
| chr7 | 64500001 | 64600000 | 109  | 115  | 64550000 | -0.14968 | 0.016864887 |
| chr7 | 64550001 | 64650000 | 42   | 33   | 64600000 | 0.275552 | 5.35E-05    |
| chr7 | 64600001 | 64700000 | 183  | 190  | 64650000 | -0.12653 | 0.036273189 |
| chr7 | 64700001 | 64800000 | 851  | 742  | 64750000 | 0.125368 | 0.037916671 |
| chr7 | 64750001 | 64850000 | 811  | 705  | 64800000 | 0.129707 | 0.033137294 |
| chr7 | 64800001 | 64900000 | 802  | 682  | 64850000 | 0.161459 | 0.011202868 |
| chr7 | 64950001 | 65050000 | 143  | 164  | 6.50E+07 | -0.27005 | 6.79E-05    |
| chr7 | 65000001 | 65100000 | 88   | 99   | 65050000 | -0.2423  | 0.000304577 |
| chr7 | 65050001 | 65150000 | 90   | 102  | 65100000 | -0.25294 | 0.000174062 |
| chr7 | 65250001 | 65350000 | 404  | 456  | 65300000 | -0.24705 | 0.000237845 |
| chr7 | 65300001 | 65400000 | 509  | 542  | 65350000 | -0.163   | 0.010400743 |
| chr7 | 65650001 | 65750000 | 941  | 822  | 65700000 | 0.122685 | 0.041145703 |
| chr7 | 65700001 | 65800000 | 975  | 852  | 65750000 | 0.122177 | 0.041780873 |
| chr7 | 65850001 | 65950000 | 438  | 452  | 65900000 | -0.11776 | 0.047308713 |
| chr7 | 66150001 | 66250000 | 632  | 699  | 66200000 | -0.21774 | 0.001024871 |
| chr7 | 66200001 | 66300000 | 620  | 646  | 66250000 | -0.13164 | 0.030878661 |
| chr7 | 66500001 | 66600000 | 222  | 231  | 66550000 | -0.1297  | 0.032835067 |
| chr7 | 66550001 | 66650000 | 190  | 200  | 66600000 | -0.14637 | 0.018921795 |
| chr7 | 66650001 | 66750000 | 216  | 176  | 66700000 | 0.223084 | 0.00082794  |
| chr7 | 66750001 | 66850000 | 485  | 501  | 66800000 | -0.1192  | 0.045337761 |
| chr7 | 67050001 | 67150000 | 966  | 1002 | 67100000 | -0.12516 | 0.037842203 |
| chr7 | 67350001 | 67450000 | 853  | 742  | 67400000 | 0.128755 | 0.034141055 |
| chr7 | 67500001 | 67600000 | 919  | 803  | 67550000 | 0.122293 | 0.041634898 |
| chr7 | 67700001 | 67800000 | 963  | 821  | 67750000 | 0.157782 | 0.01281578  |
| chr7 | 67750001 | 67850000 | 959  | 818  | 67800000 | 0.157058 | 0.013155915 |
| chr7 | 68000001 | 68100000 | 1015 | 870  | 68050000 | 0.150021 | 0.016892961 |
| chr7 | 68050001 | 68150000 | 986  | 841  | 68100000 | 0.15711  | 0.013131274 |

|      |          |          |      |      |          |          |             |
|------|----------|----------|------|------|----------|----------|-------------|
| chr7 | 68200001 | 68300000 | 858  | 747  | 68250000 | 0.127498 | 0.035504718 |
| chr7 | 68300001 | 68400000 | 914  | 800  | 68350000 | 0.119822 | 0.044832614 |
| chr7 | 68450001 | 68550000 | 988  | 862  | 68500000 | 0.124451 | 0.038995599 |
| chr7 | 68650001 | 68750000 | 927  | 813  | 68700000 | 0.116942 | 0.048807748 |
| chr7 | 69050001 | 69150000 | 1118 | 979  | 69100000 | 0.119168 | 0.045712488 |
| chr7 | 69500001 | 69600000 | 981  | 839  | 69550000 | 0.153211 | 0.015099036 |
| chr7 | 69850001 | 69950000 | 1025 | 1092 | 69900000 | -0.16372 | 0.010122831 |
| chr7 | 70750001 | 70850000 | 911  | 954  | 70800000 | -0.13891 | 0.024363673 |
| chr7 | 71050001 | 71150000 | 949  | 979  | 71100000 | -0.11727 | 0.047999379 |
| chr7 | 71150001 | 71250000 | 849  | 876  | 71200000 | -0.11754 | 0.047624953 |
| chr7 | 71250001 | 71350000 | 921  | 773  | 71300000 | 0.180361 | 0.005406413 |
| chr7 | 71300001 | 71400000 | 971  | 831  | 71350000 | 0.152251 | 0.015620515 |
| chr7 | 71900001 | 72000000 | 875  | 714  | 71950000 | 0.220987 | 0.000914586 |
| chr7 | 71950001 | 72050000 | 572  | 484  | 7.20E+07 | 0.168636 | 0.008557728 |
| chr7 | 72150001 | 72250000 | 527  | 447  | 72200000 | 0.165156 | 0.009762387 |
| chr7 | 72300001 | 72400000 | 252  | 263  | 72350000 | -0.13401 | 0.028609792 |
| chr7 | 72350001 | 72450000 | 177  | 188  | 72400000 | -0.15936 | 0.011907958 |
| chr7 | 72400001 | 72500000 | 27   | 34   | 72450000 | -0.40495 | 6.85E-09    |
| chr7 | 72450001 | 72550000 | 4    | 6    | 72500000 | -0.65733 | 1.11E-19    |
| chr7 | 72500001 | 72600000 | 1    | 4    | 72550000 | -2.07237 | 5.62E-105   |
| chr7 | 72550001 | 72650000 | 3    | 4    | 72600000 | -0.48741 | 5.63E-12    |
| chr7 | 72600001 | 72700000 | 27   | 15   | 72650000 | 0.775625 | 2.34E-25    |
| chr7 | 72650001 | 72750000 | 207  | 216  | 72700000 | -0.13377 | 0.028831366 |
| chr7 | 72700001 | 72800000 | 566  | 607  | 72750000 | -0.17327 | 0.007013994 |
| chr7 | 72750001 | 72850000 | 680  | 743  | 72800000 | -0.2002  | 0.002282578 |
| chr7 | 72800001 | 72900000 | 743  | 809  | 72850000 | -0.19515 | 0.002845249 |
| chr7 | 72850001 | 72950000 | 818  | 875  | 72900000 | -0.16955 | 0.008105252 |
| chr7 | 72900001 | 73000000 | 756  | 825  | 72950000 | -0.19838 | 0.002472485 |
| chr7 | 72950001 | 73050000 | 815  | 853  | 7.30E+07 | -0.13812 | 0.025012269 |
| chr7 | 73000001 | 73100000 | 857  | 927  | 73050000 | -0.18565 | 0.004254452 |
| chr7 | 73050001 | 73150000 | 874  | 1029 | 73100000 | -0.30791 | 7.04E-06    |
| chr7 | 73100001 | 73200000 | 826  | 912  | 73150000 | -0.21526 | 0.001151338 |
| chr7 | 73150001 | 73250000 | 754  | 811  | 73200000 | -0.17751 | 0.005927681 |
| chr7 | 73200001 | 73300000 | 762  | 864  | 73250000 | -0.25361 | 0.000167944 |
| chr7 | 73250001 | 73350000 | 808  | 884  | 73300000 | -0.20206 | 0.002101896 |
| chr7 | 73300001 | 73400000 | 835  | 875  | 73350000 | -0.13988 | 0.023590254 |
| chr7 | 73350001 | 73450000 | 917  | 956  | 73400000 | -0.13246 | 0.03007553  |
| chr7 | 73400001 | 73500000 | 958  | 1045 | 73450000 | -0.19778 | 0.002538457 |
| chr7 | 73450001 | 73550000 | 845  | 928  | 73500000 | -0.20755 | 0.001643199 |
| chr7 | 73600001 | 73700000 | 748  | 786  | 73650000 | -0.14386 | 0.020623093 |
| chr7 | 73650001 | 73750000 | 782  | 862  | 73700000 | -0.21289 | 0.001285838 |
| chr7 | 73900001 | 74000000 | 746  | 783  | 73950000 | -0.14221 | 0.021814286 |
| chr7 | 74150001 | 74250000 | 15   | 19   | 74200000 | -0.41341 | 3.47E-09    |
| chr7 | 74200001 | 74300000 | 22   | 16   | 74250000 | 0.38706  | 3.38E-08    |
| chr7 | 74300001 | 74400000 | 37   | 55   | 74350000 | -0.64428 | 4.96E-19    |
| chr7 | 74350001 | 74450000 | 12   | 21   | 74400000 | -0.87973 | 6.33E-32    |
| chr7 | 74400001 | 74500000 | 80   | 91   | 74450000 | -0.25824 | 0.000130802 |

|      |          |          |      |     |          |          |             |
|------|----------|----------|------|-----|----------|----------|-------------|
| chr7 | 74450001 | 74550000 | 93   | 100 | 74500000 | -0.17707 | 0.00603293  |
| chr7 | 74600001 | 74700000 | 6    | 3   | 74650000 | 0.927628 | 7.06E-34    |
| chr7 | 74700001 | 74800000 | 0    | 2   | 74750000 | #NAME?   | 1.59E-189   |
| chr7 | 74750001 | 74850000 | 1    | 2   | 74800000 | -1.07237 | 8.26E-44    |
| chr7 | 74800001 | 74900000 | 2    | 1   | 74850000 | 0.927628 | 7.06E-34    |
| chr7 | 74850001 | 74950000 | 3    | 1   | 74900000 | 1.512591 | 1.57E-69    |
| chr7 | 74900001 | 75000000 | 5    | 2   | 74950000 | 1.249556 | 2.09E-53    |
| chr7 | 74950001 | 75050000 | 10   | 13  | 7.50E+07 | -0.45088 | 1.49E-10    |
| chr7 | 75000001 | 75100000 | 80   | 93  | 75050000 | -0.2896  | 2.17E-05    |
| chr7 | 75050001 | 75150000 | 99   | 106 | 75100000 | -0.17094 | 0.007682756 |
| chr7 | 75200001 | 75300000 | 832  | 902 | 75250000 | -0.18892 | 0.003711223 |
| chr7 | 75250001 | 75350000 | 824  | 875 | 75300000 | -0.15901 | 0.012059879 |
| chr7 | 75400001 | 75500000 | 686  | 719 | 75450000 | -0.14015 | 0.023373405 |
| chr7 | 75550001 | 75650000 | 885  | 920 | 75600000 | -0.12833 | 0.034290243 |
| chr7 | 75600001 | 75700000 | 882  | 982 | 75650000 | -0.22732 | 0.00064674  |
| chr7 | 75650001 | 75750000 | 693  | 777 | 75700000 | -0.23743 | 0.000390684 |
| chr7 | 75700001 | 75800000 | 428  | 477 | 75750000 | -0.22875 | 0.000602803 |
| chr7 | 75750001 | 75850000 | 611  | 646 | 75800000 | -0.15273 | 0.015136598 |
| chr7 | 75850001 | 75950000 | 869  | 930 | 75900000 | -0.17025 | 0.007891042 |
| chr7 | 75900001 | 76000000 | 840  | 904 | 75950000 | -0.17831 | 0.00574141  |
| chr7 | 76050001 | 76150000 | 227  | 265 | 76100000 | -0.29567 | 1.51E-05    |
| chr7 | 76100001 | 76200000 | 118  | 168 | 76150000 | -0.58205 | 4.64E-16    |
| chr7 | 76400001 | 76500000 | 108  | 119 | 76450000 | -0.2123  | 0.001321386 |
| chr7 | 76450001 | 76550000 | 84   | 104 | 76500000 | -0.38049 | 4.56E-08    |
| chr7 | 76500001 | 76600000 | 71   | 77  | 76550000 | -0.18941 | 0.00363458  |
| chr7 | 76550001 | 76650000 | 92   | 121 | 76600000 | -0.46767 | 3.39E-11    |
| chr7 | 76600001 | 76700000 | 70   | 105 | 76650000 | -0.65733 | 1.11E-19    |
| chr7 | 76650001 | 76750000 | 45   | 49  | 76700000 | -0.19523 | 0.002835526 |
| chr7 | 76700001 | 76800000 | 84   | 88  | 76750000 | -0.13949 | 0.023901227 |
| chr7 | 76950001 | 77050000 | 1008 | 882 | 7.70E+07 | 0.120273 | 0.044234652 |
| chr7 | 77150001 | 77250000 | 905  | 951 | 77200000 | -0.1439  | 0.020597442 |
| chr7 | 78100001 | 78200000 | 928  | 982 | 78150000 | -0.15397 | 0.014481978 |
| chr7 | 78250001 | 78350000 | 1005 | 877 | 78300000 | 0.124175 | 0.03932579  |
| chr7 | 78300001 | 78400000 | 1062 | 913 | 78350000 | 0.145725 | 0.019595332 |
| chr7 | 78650001 | 78750000 | 958  | 828 | 78700000 | 0.138023 | 0.025365958 |
| chr7 | 78700001 | 78800000 | 1007 | 797 | 78750000 | 0.26504  | 9.63E-05    |
| chr7 | 78750001 | 78850000 | 971  | 809 | 78800000 | 0.19096  | 0.003496643 |
| chr7 | 78850001 | 78950000 | 999  | 868 | 78900000 | 0.130418 | 0.032403759 |
| chr7 | 78900001 | 79000000 | 1068 | 904 | 78950000 | 0.168145 | 0.008719393 |
| chr7 | 78950001 | 79050000 | 1033 | 905 | 7.90E+07 | 0.118479 | 0.046653206 |
| chr7 | 79000001 | 79100000 | 1022 | 866 | 79050000 | 0.166584 | 0.009251104 |
| chr7 | 79150001 | 79250000 | 1130 | 922 | 79200000 | 0.221112 | 0.000909188 |
| chr7 | 79200001 | 79300000 | 1076 | 896 | 79250000 | 0.191736 | 0.003384254 |
| chr7 | 79300001 | 79400000 | 984  | 837 | 79350000 | 0.161059 | 0.011369212 |
| chr7 | 79350001 | 79450000 | 958  | 826 | 79400000 | 0.141512 | 0.02259547  |
| chr7 | 79650001 | 79750000 | 1024 | 898 | 79700000 | 0.117057 | 0.048644667 |
| chr7 | 79900001 | 80000000 | 962  | 999 | 79950000 | -0.12682 | 0.03594536  |

|      |          |          |      |     |          |          |             |
|------|----------|----------|------|-----|----------|----------|-------------|
| chr7 | 80200001 | 80300000 | 1066 | 914 | 80250000 | 0.14957  | 0.01716083  |
| chr7 | 80250001 | 80350000 | 961  | 784 | 80300000 | 0.221311 | 0.000900681 |
| chr7 | 80400001 | 80500000 | 1030 | 857 | 80450000 | 0.192905 | 0.00322095  |
| chr7 | 80650001 | 80750000 | 920  | 778 | 80700000 | 0.169492 | 0.008282384 |
| chr7 | 80700001 | 80800000 | 991  | 847 | 80750000 | 0.154151 | 0.014602389 |
| chr7 | 80950001 | 81050000 | 1072 | 876 | 8.10E+07 | 0.21893  | 0.001007626 |
| chr7 | 81000001 | 81100000 | 972  | 845 | 81050000 | 0.129633 | 0.033214096 |
| chr7 | 81250001 | 81350000 | 1097 | 936 | 81300000 | 0.156611 | 0.013369863 |
| chr7 | 81350001 | 81450000 | 1059 | 872 | 81400000 | 0.207931 | 0.001670599 |
| chr7 | 81400001 | 81500000 | 1012 | 864 | 81450000 | 0.155734 | 0.013798519 |
| chr7 | 81600001 | 81700000 | 1091 | 907 | 81650000 | 0.194105 | 0.00306093  |
| chr7 | 81650001 | 81750000 | 1089 | 915 | 81700000 | 0.178789 | 0.005757875 |
| chr7 | 81700001 | 81800000 | 1054 | 868 | 81750000 | 0.207736 | 0.00168529  |
| chr7 | 81750001 | 81850000 | 1078 | 906 | 81800000 | 0.178402 | 0.005847223 |
| chr7 | 81800001 | 81900000 | 1052 | 922 | 81850000 | 0.117924 | 0.047421718 |
| chr7 | 82050001 | 82150000 | 996  | 795 | 82100000 | 0.252819 | 0.000185914 |
| chr7 | 82100001 | 82200000 | 948  | 798 | 82150000 | 0.176127 | 0.006399436 |
| chr7 | 82150001 | 82250000 | 909  | 780 | 82200000 | 0.148434 | 0.017851163 |
| chr7 | 82550001 | 82650000 | 1067 | 932 | 82600000 | 0.122787 | 0.041019023 |
| chr7 | 82600001 | 82700000 | 1013 | 884 | 82650000 | 0.124144 | 0.039362787 |
| chr7 | 82950001 | 83050000 | 1055 | 913 | 8.30E+07 | 0.136184 | 0.026937428 |
| chr7 | 83000001 | 83100000 | 987  | 848 | 83050000 | 0.146614 | 0.019007749 |
| chr7 | 83050001 | 83150000 | 939  | 812 | 83100000 | 0.137274 | 0.025996948 |
| chr7 | 83100001 | 83200000 | 1043 | 871 | 83150000 | 0.187623 | 0.004019367 |
| chr7 | 83150001 | 83250000 | 1045 | 889 | 83200000 | 0.160876 | 0.011446099 |
| chr7 | 83200001 | 83300000 | 968  | 846 | 83250000 | 0.121978 | 0.042032592 |
| chr7 | 83300001 | 83400000 | 906  | 795 | 83350000 | 0.116184 | 0.049899322 |
| chr7 | 83350001 | 83450000 | 981  | 848 | 83400000 | 0.137817 | 0.025538113 |
| chr7 | 83700001 | 83800000 | 997  | 820 | 83750000 | 0.209598 | 0.001549474 |
| chr7 | 83750001 | 83850000 | 1003 | 862 | 83800000 | 0.14619  | 0.019286138 |
| chr7 | 83800001 | 83900000 | 1000 | 874 | 83850000 | 0.121923 | 0.042101691 |
| chr7 | 83850001 | 83950000 | 1017 | 875 | 83900000 | 0.144593 | 0.020366198 |
| chr7 | 83900001 | 84000000 | 1039 | 847 | 83950000 | 0.22239  | 0.000855744 |
| chr7 | 83950001 | 84050000 | 992  | 797 | 8.40E+07 | 0.243389 | 0.000303572 |
| chr7 | 84000001 | 84100000 | 933  | 808 | 84050000 | 0.13515  | 0.027856859 |
| chr7 | 84050001 | 84150000 | 943  | 816 | 84100000 | 0.136317 | 0.026821618 |
| chr7 | 84100001 | 84200000 | 1007 | 871 | 84150000 | 0.136947 | 0.02627582  |
| chr7 | 84450001 | 84550000 | 989  | 846 | 84500000 | 0.152941 | 0.01524395  |
| chr7 | 84500001 | 84600000 | 1007 | 855 | 84550000 | 0.163696 | 0.010310817 |
| chr7 | 84650001 | 84750000 | 1110 | 958 | 84700000 | 0.14009  | 0.023691896 |
| chr7 | 84700001 | 84800000 | 1088 | 930 | 84750000 | 0.154004 | 0.014679131 |
| chr7 | 84750001 | 84850000 | 1090 | 916 | 84800000 | 0.178537 | 0.005815979 |
| chr7 | 84900001 | 85000000 | 1025 | 883 | 84950000 | 0.142767 | 0.021663841 |
| chr7 | 84950001 | 85050000 | 994  | 853 | 8.50E+07 | 0.148328 | 0.017916857 |
| chr7 | 85000001 | 85100000 | 1036 | 876 | 85050000 | 0.169649 | 0.008232552 |
| chr7 | 85050001 | 85150000 | 1046 | 907 | 85100000 | 0.133337 | 0.029531919 |
| chr7 | 85200001 | 85300000 | 1027 | 880 | 85250000 | 0.150489 | 0.016618636 |

|      |          |          |      |     |          |          |             |
|------|----------|----------|------|-----|----------|----------|-------------|
| chr7 | 85250001 | 85350000 | 994  | 840 | 85300000 | 0.170485 | 0.007972696 |
| chr7 | 85300001 | 85400000 | 980  | 850 | 85350000 | 0.132947 | 0.029902435 |
| chr7 | 85700001 | 85800000 | 1015 | 850 | 85750000 | 0.183573 | 0.004747327 |
| chr7 | 85750001 | 85850000 | 938  | 748 | 85800000 | 0.254178 | 0.000173013 |
| chr7 | 85950001 | 86050000 | 879  | 769 | 8.60E+07 | 0.120508 | 0.043926252 |
| chr7 | 86000001 | 86100000 | 952  | 793 | 86050000 | 0.191269 | 0.003451467 |
| chr7 | 86050001 | 86150000 | 1015 | 871 | 86100000 | 0.148363 | 0.017895159 |
| chr7 | 86300001 | 86400000 | 1155 | 947 | 86350000 | 0.214085 | 0.001262283 |
| chr7 | 86650001 | 86750000 | 908  | 795 | 86700000 | 0.119366 | 0.04544493  |
| chr7 | 87350001 | 87450000 | 889  | 773 | 87400000 | 0.129343 | 0.033517759 |
| chr7 | 88250001 | 88350000 | 979  | 851 | 88300000 | 0.129778 | 0.033063356 |
| chr7 | 88300001 | 88400000 | 1045 | 826 | 88350000 | 0.266917 | 8.68E-05    |
| chr7 | 88350001 | 88450000 | 1042 | 904 | 88400000 | 0.132589 | 0.030246699 |
| chr7 | 88800001 | 88900000 | 992  | 860 | 88850000 | 0.133632 | 0.02925378  |
| chr7 | 88850001 | 88950000 | 1006 | 880 | 88900000 | 0.120683 | 0.043696825 |
| chr7 | 89050001 | 89150000 | 926  | 957 | 89100000 | -0.11988 | 0.044425366 |
| chr7 | 89250001 | 89350000 | 963  | 795 | 89300000 | 0.204209 | 0.001972815 |
| chr7 | 89300001 | 89400000 | 987  | 825 | 89350000 | 0.186284 | 0.004248063 |
| chr7 | 89350001 | 89450000 | 999  | 840 | 89400000 | 0.177724 | 0.006007325 |
| chr7 | 89450001 | 89550000 | 847  | 879 | 89500000 | -0.12587 | 0.037016961 |
| chr7 | 89550001 | 89650000 | 985  | 863 | 89600000 | 0.118391 | 0.046773655 |
| chr7 | 89850001 | 89950000 | 1049 | 908 | 89900000 | 0.135879 | 0.027206505 |
| chr7 | 90050001 | 90150000 | 979  | 854 | 90100000 | 0.124701 | 0.038699374 |
| chr7 | 90600001 | 90700000 | 915  | 960 | 90650000 | -0.14163 | 0.022240981 |
| chr7 | 91100001 | 91200000 | 898  | 775 | 91150000 | 0.140147 | 0.023647076 |
| chr7 | 91150001 | 91250000 | 932  | 776 | 91200000 | 0.191902 | 0.003360654 |
| chr7 | 91500001 | 91600000 | 950  | 828 | 91550000 | 0.125925 | 0.037273404 |
| chr7 | 91550001 | 91650000 | 970  | 840 | 91600000 | 0.135224 | 0.027790558 |
| chr7 | 91900001 | 92000000 | 967  | 842 | 91950000 | 0.127324 | 0.035696666 |
| chr7 | 92500001 | 92600000 | 934  | 807 | 92550000 | 0.138482 | 0.024985917 |
| chr7 | 92550001 | 92650000 | 1021 | 873 | 92600000 | 0.153558 | 0.014914187 |
| chr7 | 92600001 | 92700000 | 1035 | 870 | 92650000 | 0.178172 | 0.005901213 |
| chr7 | 92650001 | 92750000 | 920  | 784 | 92700000 | 0.158408 | 0.012527421 |
| chr7 | 92750001 | 92850000 | 1006 | 866 | 92800000 | 0.14382  | 0.020907442 |
| chr7 | 92850001 | 92950000 | 1069 | 928 | 92900000 | 0.131693 | 0.031121497 |
| chr7 | 93550001 | 93650000 | 1101 | 958 | 93600000 | 0.128345 | 0.034580583 |
| chr7 | 93700001 | 93800000 | 1080 | 936 | 93750000 | 0.134079 | 0.028836197 |
| chr7 | 93750001 | 93850000 | 1047 | 891 | 93800000 | 0.160392 | 0.011651346 |
| chr7 | 93800001 | 93900000 | 1014 | 879 | 93850000 | 0.133751 | 0.029142113 |
| chr7 | 94450001 | 94550000 | 1006 | 877 | 94500000 | 0.12561  | 0.037636431 |
| chr7 | 94500001 | 94600000 | 1002 | 869 | 94550000 | 0.133083 | 0.029773081 |
| chr7 | 94550001 | 94650000 | 976  | 840 | 94600000 | 0.14412  | 0.020695745 |
| chr7 | 94600001 | 94700000 | 955  | 796 | 94650000 | 0.190361 | 0.003585747 |
| chr7 | 94650001 | 94750000 | 941  | 768 | 94700000 | 0.220717 | 0.000926354 |
| chr7 | 94700001 | 94800000 | 953  | 802 | 94750000 | 0.176502 | 0.006305211 |
| chr7 | 94750001 | 94850000 | 910  | 780 | 94800000 | 0.150021 | 0.016892961 |
| chr7 | 94800001 | 94900000 | 953  | 809 | 94850000 | 0.163965 | 0.010207786 |

|      |          |          |      |      |           |          |             |
|------|----------|----------|------|------|-----------|----------|-------------|
| chr7 | 94850001 | 94950000 | 1075 | 922  | 94900000  | 0.149126 | 0.017427673 |
| chr7 | 95900001 | 96000000 | 893  | 935  | 95950000  | -0.13868 | 0.024552075 |
| chr7 | 96100001 | 96200000 | 929  | 997  | 96150000  | -0.17429 | 0.006737769 |
| chr7 | 96850001 | 96950000 | 950  | 809  | 96900000  | 0.159416 | 0.012075566 |
| chr7 | 97250001 | 97350000 | 991  | 799  | 97300000  | 0.238318 | 0.000392643 |
| chr7 | 97300001 | 97400000 | 907  | 769  | 97350000  | 0.165747 | 0.009547938 |
| chr7 | 97500001 | 97600000 | 185  | 195  | 97550000  | -0.14832 | 0.017684891 |
| chr7 | 97550001 | 97650000 | 280  | 302  | 97600000  | -0.18149 | 0.005046518 |
| chr7 | 97800001 | 97900000 | 948  | 986  | 97850000  | -0.12907 | 0.033497218 |
| chr7 | 99150001 | 99250000 | 907  | 972  | 99200000  | -0.17223 | 0.007305976 |
| chr7 | 99200001 | 99300000 | 808  | 846  | 99250000  | -0.13867 | 0.024555187 |
| chr7 | 99500001 | 99600000 | 863  | 908  | 99550000  | -0.1457  | 0.019363098 |
| chr7 | 99650001 | 99750000 | 847  | 890  | 99700000  | -0.14382 | 0.020656632 |
| chr7 | 99700001 | 99800000 | 798  | 870  | 99750000  | -0.197   | 0.002626086 |
| chr7 | 99750001 | 99850000 | 689  | 729  | 99800000  | -0.15379 | 0.014577501 |
| chr7 | 99800001 | 99900000 | 391  | 413  | 99850000  | -0.15134 | 0.01590202  |
| chr7 | 99900001 | 1E+08    | 555  | 594  | 99950000  | -0.17035 | 0.00786033  |
| chr7 | 1E+08    | 1E+08    | 916  | 958  | 100050000 | -0.13705 | 0.025908885 |
| chr7 | 1E+08    | 1E+08    | 815  | 858  | 100100000 | -0.14655 | 0.018806451 |
| chr7 | 1E+08    | 1E+08    | 839  | 887  | 100300000 | -0.15264 | 0.015189823 |
| chr7 | 1E+08    | 1.01E+08 | 852  | 996  | 100450000 | -0.29766 | 1.33E-05    |
| chr7 | 1E+08    | 1.01E+08 | 830  | 961  | 100500000 | -0.2838  | 3.07E-05    |
| chr7 | 1.01E+08 | 1.01E+08 | 468  | 508  | 100550000 | -0.19069 | 0.003443065 |
| chr7 | 1.01E+08 | 1.01E+08 | 458  | 507  | 100600000 | -0.21901 | 0.000965068 |
| chr7 | 1.01E+08 | 1.01E+08 | 782  | 855  | 100650000 | -0.20113 | 0.00219088  |
| chr7 | 1.01E+08 | 1.01E+08 | 904  | 950  | 100800000 | -0.14398 | 0.020543295 |
| chr7 | 1.01E+08 | 1.01E+08 | 871  | 1012 | 100850000 | -0.28884 | 2.28E-05    |
| chr7 | 1.01E+08 | 1.01E+08 | 753  | 814  | 100900000 | -0.18475 | 0.004415113 |
| chr7 | 1.01E+08 | 1.01E+08 | 896  | 971  | 101150000 | -0.18834 | 0.003801396 |
| chr7 | 1.01E+08 | 1.01E+08 | 1005 | 1088 | 101200000 | -0.18685 | 0.00404581  |
| chr7 | 1.01E+08 | 1.02E+08 | 906  | 969  | 101500000 | -0.16936 | 0.008166991 |
| chr7 | 1.02E+08 | 1.02E+08 | 846  | 913  | 101800000 | -0.18233 | 0.004877309 |
| chr7 | 1.02E+08 | 1.02E+08 | 915  | 958  | 101850000 | -0.13863 | 0.024594693 |
| chr7 | 1.02E+08 | 1.02E+08 | 963  | 1004 | 101900000 | -0.13252 | 0.030015075 |
| chr7 | 1.02E+08 | 1.02E+08 | 670  | 757  | 101950000 | -0.2485  | 0.000220344 |
| chr7 | 1.02E+08 | 1.02E+08 | 427  | 464  | 1.02E+08  | -0.19226 | 0.003220858 |
| chr7 | 1.02E+08 | 1.02E+08 | 698  | 732  | 102050000 | -0.14099 | 0.022729647 |
| chr7 | 1.02E+08 | 1.02E+08 | 571  | 662  | 102100000 | -0.28571 | 2.74E-05    |
| chr7 | 1.02E+08 | 1.02E+08 | 132  | 193  | 102150000 | -0.62043 | 7.22E-18    |
| chr7 | 1.02E+08 | 1.02E+08 | 7    | 14   | 102200000 | -1.07237 | 8.26E-44    |
| chr7 | 1.02E+08 | 1.02E+08 | 7    | 11   | 102250000 | -0.72445 | 3.73E-23    |
| chr7 | 1.02E+08 | 1.02E+08 | 130  | 107  | 102400000 | 0.208529 | 0.001626167 |
| chr7 | 1.03E+08 | 1.03E+08 | 491  | 396  | 102800000 | 0.237851 | 0.000401966 |
| chr7 | 1.03E+08 | 1.03E+08 | 104  | 118  | 102850000 | -0.25458 | 0.000159479 |
| chr7 | 1.03E+08 | 1.03E+08 | 892  | 940  | 1.03E+08  | -0.14799 | 0.017890525 |
| chr7 | 1.03E+08 | 1.03E+08 | 782  | 872  | 103100000 | -0.22953 | 0.000580053 |
| chr7 | 1.03E+08 | 1.03E+08 | 877  | 931  | 103150000 | -0.15858 | 0.012253755 |

|      |          |          |      |      |           |          |             |
|------|----------|----------|------|------|-----------|----------|-------------|
| chr7 | 1.04E+08 | 1.04E+08 | 1111 | 961  | 103650000 | 0.136879 | 0.026334736 |
| chr7 | 1.04E+08 | 1.05E+08 | 918  | 961  | 104500000 | -0.13841 | 0.024767861 |
| chr7 | 1.05E+08 | 1.05E+08 | 853  | 893  | 104550000 | -0.13849 | 0.024708705 |
| chr7 | 1.05E+08 | 1.05E+08 | 868  | 750  | 105200000 | 0.138433 | 0.025026613 |
| chr7 | 1.05E+08 | 1.05E+08 | 940  | 811  | 105250000 | 0.140587 | 0.023303836 |
| chr7 | 1.05E+08 | 1.06E+08 | 1045 | 1090 | 105450000 | -0.1332  | 0.029371729 |
| chr7 | 1.06E+08 | 1.06E+08 | 979  | 1036 | 105600000 | -0.15402 | 0.014458611 |
| chr7 | 1.06E+08 | 1.06E+08 | 1057 | 1095 | 105650000 | -0.12333 | 0.040029223 |
| chr7 | 1.06E+08 | 1.06E+08 | 979  | 845  | 106100000 | 0.139986 | 0.023774303 |
| chr7 | 1.07E+08 | 1.07E+08 | 1046 | 888  | 106950000 | 0.163879 | 0.010240318 |
| chr7 | 1.07E+08 | 1.07E+08 | 959  | 838  | 1.07E+08  | 0.122209 | 0.041740865 |
| chr7 | 1.07E+08 | 1.08E+08 | 993  | 862  | 107450000 | 0.131734 | 0.031081279 |
| chr7 | 1.07E+08 | 1.08E+08 | 998  | 853  | 107500000 | 0.154122 | 0.014617493 |
| chr7 | 1.08E+08 | 1.08E+08 | 1003 | 865  | 107650000 | 0.141178 | 0.022849342 |
| chr7 | 1.08E+08 | 1.08E+08 | 1031 | 881  | 107700000 | 0.154459 | 0.014443236 |
| chr7 | 1.08E+08 | 1.08E+08 | 940  | 811  | 107950000 | 0.140587 | 0.023303836 |
| chr7 | 1.09E+08 | 1.09E+08 | 995  | 859  | 108650000 | 0.139667 | 0.024027219 |
| chr7 | 1.09E+08 | 1.09E+08 | 974  | 847  | 108950000 | 0.129188 | 0.033681232 |
| chr7 | 1.09E+08 | 1.09E+08 | 1008 | 873  | 109100000 | 0.13507  | 0.027928781 |
| chr7 | 1.09E+08 | 1.09E+08 | 1050 | 918  | 109150000 | 0.121451 | 0.042702652 |
| chr7 | 1.1E+08  | 1.1E+08  | 930  | 780  | 109550000 | 0.181385 | 0.00518798  |
| chr7 | 1.1E+08  | 1.1E+08  | 987  | 837  | 109600000 | 0.165451 | 0.009655033 |
| chr7 | 1.1E+08  | 1.1E+08  | 1005 | 881  | 109650000 | 0.11761  | 0.047862059 |
| chr7 | 1.1E+08  | 1.1E+08  | 1025 | 885  | 109850000 | 0.139503 | 0.024157951 |
| chr7 | 1.1E+08  | 1.1E+08  | 977  | 843  | 1.10E+08  | 0.140454 | 0.023407141 |
| chr7 | 1.1E+08  | 1.1E+08  | 1041 | 894  | 110050000 | 0.147252 | 0.018595621 |
| chr7 | 1.1E+08  | 1.1E+08  | 974  | 851  | 110100000 | 0.122391 | 0.04151228  |
| chr7 | 1.11E+08 | 1.11E+08 | 1024 | 893  | 110850000 | 0.125112 | 0.038215826 |
| chr7 | 1.11E+08 | 1.11E+08 | 964  | 803  | 111050000 | 0.191261 | 0.003452564 |
| chr7 | 1.11E+08 | 1.11E+08 | 884  | 914  | 111150000 | -0.12052 | 0.043579928 |
| chr7 | 1.12E+08 | 1.12E+08 | 1112 | 923  | 111750000 | 0.196382 | 0.002776699 |
| chr7 | 1.12E+08 | 1.12E+08 | 921  | 807  | 112300000 | 0.118261 | 0.046954237 |
| chr7 | 1.12E+08 | 1.13E+08 | 989  | 859  | 112450000 | 0.130941 | 0.031873041 |
| chr7 | 1.13E+08 | 1.13E+08 | 1020 | 889  | 112750000 | 0.125942 | 0.037253811 |
| chr7 | 1.13E+08 | 1.13E+08 | 979  | 829  | 1.13E+08  | 0.167565 | 0.008913838 |
| chr7 | 1.13E+08 | 1.13E+08 | 1047 | 863  | 113050000 | 0.206457 | 0.001784806 |
| chr7 | 1.13E+08 | 1.14E+08 | 951  | 830  | 113500000 | 0.123962 | 0.039581477 |
| chr7 | 1.14E+08 | 1.14E+08 | 971  | 833  | 113550000 | 0.148783 | 0.017636669 |
| chr7 | 1.14E+08 | 1.14E+08 | 977  | 828  | 1.14E+08  | 0.166356 | 0.009331284 |
| chr7 | 1.14E+08 | 1.14E+08 | 983  | 809  | 114050000 | 0.20868  | 0.001615133 |
| chr7 | 1.14E+08 | 1.14E+08 | 959  | 840  | 114100000 | 0.11877  | 0.046254026 |
| chr7 | 1.14E+08 | 1.14E+08 | 1071 | 845  | 114200000 | 0.269563 | 7.49E-05    |
| chr7 | 1.14E+08 | 1.14E+08 | 1102 | 919  | 114250000 | 0.189616 | 0.00369934  |
| chr7 | 1.14E+08 | 1.14E+08 | 1075 | 929  | 114300000 | 0.138214 | 0.025207001 |
| chr7 | 1.14E+08 | 1.14E+08 | 1041 | 912  | 114350000 | 0.118493 | 0.046634233 |
| chr7 | 1.14E+08 | 1.15E+08 | 1066 | 876  | 114450000 | 0.210833 | 0.001464977 |
| chr7 | 1.14E+08 | 1.15E+08 | 1052 | 850  | 114500000 | 0.235228 | 0.000458275 |

|      |          |          |      |     |           |          |             |
|------|----------|----------|------|-----|-----------|----------|-------------|
| chr7 | 1.15E+08 | 1.15E+08 | 1002 | 856 | 114650000 | 0.154828 | 0.014253918 |
| chr7 | 1.15E+08 | 1.15E+08 | 1033 | 888 | 114900000 | 0.145837 | 0.019520668 |
| chr7 | 1.15E+08 | 1.15E+08 | 1039 | 899 | 114950000 | 0.136431 | 0.026722213 |
| chr7 | 1.15E+08 | 1.15E+08 | 1048 | 914 | 1.15E+08  | 0.125001 | 0.038345964 |
| chr7 | 1.15E+08 | 1.15E+08 | 1092 | 918 | 115100000 | 0.178035 | 0.005933397 |
| chr7 | 1.15E+08 | 1.16E+08 | 1002 | 850 | 115500000 | 0.164976 | 0.009828691 |
| chr7 | 1.16E+08 | 1.16E+08 | 1004 | 796 | 115550000 | 0.262547 | 0.000110318 |
| chr7 | 1.16E+08 | 1.16E+08 | 977  | 748 | 115600000 | 0.312949 | 5.70E-06    |
| chr7 | 1.16E+08 | 1.16E+08 | 992  | 860 | 115750000 | 0.133632 | 0.02925378  |
| chr7 | 1.16E+08 | 1.16E+08 | 1039 | 894 | 116150000 | 0.144477 | 0.020446501 |
| chr7 | 1.16E+08 | 1.16E+08 | 1117 | 964 | 116200000 | 0.140152 | 0.023643149 |
| chr7 | 1.16E+08 | 1.16E+08 | 1121 | 962 | 116250000 | 0.148306 | 0.017930902 |
| chr7 | 1.17E+08 | 1.17E+08 | 930  | 810 | 116600000 | 0.126937 | 0.036127101 |
| chr7 | 1.18E+08 | 1.18E+08 | 924  | 983 | 117700000 | -0.16167 | 0.010929801 |
| chr7 | 1.18E+08 | 1.18E+08 | 984  | 854 | 1.18E+08  | 0.13205  | 0.030770146 |
| chr7 | 1.18E+08 | 1.18E+08 | 1017 | 884 | 118050000 | 0.12983  | 0.033009681 |
| chr7 | 1.18E+08 | 1.19E+08 | 1083 | 904 | 118450000 | 0.188267 | 0.003913327 |
| chr7 | 1.18E+08 | 1.19E+08 | 1046 | 899 | 118500000 | 0.146118 | 0.019333757 |
| chr7 | 1.19E+08 | 1.19E+08 | 1036 | 897 | 118550000 | 0.135472 | 0.027567598 |
| chr7 | 1.19E+08 | 1.19E+08 | 1029 | 887 | 118750000 | 0.141865 | 0.022329923 |
| chr7 | 1.19E+08 | 1.19E+08 | 1034 | 907 | 118800000 | 0.11669  | 0.049168966 |
| chr7 | 1.19E+08 | 1.19E+08 | 1024 | 874 | 1.19E+08  | 0.156139 | 0.013599378 |
| chr7 | 1.19E+08 | 1.19E+08 | 1063 | 930 | 119050000 | 0.120467 | 0.043979514 |
| chr7 | 1.19E+08 | 1.19E+08 | 956  | 824 | 119100000 | 0.141995 | 0.02223334  |
| chr7 | 1.19E+08 | 1.19E+08 | 927  | 772 | 119150000 | 0.191597 | 0.003404139 |
| chr7 | 1.19E+08 | 1.19E+08 | 879  | 754 | 119250000 | 0.148927 | 0.017548816 |
| chr7 | 1.19E+08 | 1.19E+08 | 1005 | 772 | 119300000 | 0.308151 | 7.69E-06    |
| chr7 | 1.19E+08 | 1.19E+08 | 1095 | 855 | 119350000 | 0.284563 | 3.19E-05    |
| chr7 | 1.19E+08 | 1.19E+08 | 1084 | 921 | 119400000 | 0.16272  | 0.010691966 |
| chr7 | 1.2E+08  | 1.2E+08  | 953  | 799 | 119650000 | 0.181909 | 0.005079241 |
| chr7 | 1.2E+08  | 1.2E+08  | 983  | 841 | 119700000 | 0.152714 | 0.015367086 |
| chr7 | 1.2E+08  | 1.2E+08  | 1014 | 886 | 119750000 | 0.122307 | 0.041617102 |
| chr7 | 1.2E+08  | 1.2E+08  | 1026 | 849 | 119800000 | 0.200823 | 0.00229028  |
| chr7 | 1.2E+08  | 1.2E+08  | 1049 | 874 | 119950000 | 0.190938 | 0.003499893 |
| chr7 | 1.2E+08  | 1.2E+08  | 1079 | 882 | 1.20E+08  | 0.218473 | 0.001029488 |
| chr7 | 1.2E+08  | 1.2E+08  | 1096 | 945 | 120050000 | 0.14149  | 0.022612338 |
| chr7 | 1.2E+08  | 1.2E+08  | 1026 | 836 | 120400000 | 0.223084 | 0.00082794  |
| chr7 | 1.21E+08 | 1.21E+08 | 1017 | 834 | 1.21E+08  | 0.213829 | 0.001277262 |
| chr7 | 1.21E+08 | 1.21E+08 | 1073 | 896 | 121050000 | 0.187708 | 0.004005242 |
| chr7 | 1.21E+08 | 1.21E+08 | 1025 | 887 | 121100000 | 0.136246 | 0.02688343  |
| chr7 | 1.21E+08 | 1.21E+08 | 1019 | 884 | 121300000 | 0.132664 | 0.030174197 |
| chr7 | 1.22E+08 | 1.22E+08 | 1093 | 955 | 121550000 | 0.122349 | 0.041564766 |
| chr7 | 1.22E+08 | 1.22E+08 | 1036 | 903 | 121650000 | 0.125854 | 0.03735451  |
| chr7 | 1.22E+08 | 1.22E+08 | 858  | 726 | 121850000 | 0.168636 | 0.008557728 |
| chr7 | 1.22E+08 | 1.22E+08 | 1014 | 886 | 122050000 | 0.122307 | 0.041617102 |
| chr7 | 1.22E+08 | 1.22E+08 | 1025 | 850 | 122100000 | 0.197717 | 0.002621434 |
| chr7 | 1.22E+08 | 1.22E+08 | 1042 | 870 | 122150000 | 0.187896 | 0.003974034 |



|      |          |          |      |      |           |          |             |
|------|----------|----------|------|------|-----------|----------|-------------|
| chr7 | 1.22E+08 | 1.23E+08 | 914  | 800  | 122500000 | 0.119822 | 0.044832614 |
| chr7 | 1.23E+08 | 1.23E+08 | 895  | 931  | 122700000 | -0.12927 | 0.033294147 |
| chr7 | 1.23E+08 | 1.23E+08 | 1050 | 909  | 122800000 | 0.135665 | 0.027395588 |
| chr7 | 1.23E+08 | 1.23E+08 | 1077 | 897  | 122850000 | 0.191467 | 0.003422858 |
| chr7 | 1.24E+08 | 1.24E+08 | 969  | 802  | 123750000 | 0.200523 | 0.002320513 |
| chr7 | 1.24E+08 | 1.24E+08 | 1002 | 872  | 123800000 | 0.128111 | 0.034834214 |
| chr7 | 1.24E+08 | 1.24E+08 | 1024 | 878  | 124200000 | 0.149551 | 0.017171892 |
| chr7 | 1.24E+08 | 1.24E+08 | 1009 | 814  | 124250000 | 0.237454 | 0.000410057 |
| chr7 | 1.24E+08 | 1.24E+08 | 947  | 998  | 124350000 | -0.14805 | 0.01785422  |
| chr7 | 1.24E+08 | 1.25E+08 | 991  | 836  | 124500000 | 0.17301  | 0.007230493 |
| chr7 | 1.25E+08 | 1.25E+08 | 956  | 828  | 124550000 | 0.135008 | 0.027985039 |
| chr7 | 1.25E+08 | 1.25E+08 | 862  | 753  | 124650000 | 0.122666 | 0.041168498 |
| chr7 | 1.25E+08 | 1.25E+08 | 990  | 850  | 1.25E+08  | 0.147594 | 0.018377747 |
| chr7 | 1.25E+08 | 1.25E+08 | 989  | 829  | 125050000 | 0.182227 | 0.005014322 |
| chr7 | 1.25E+08 | 1.25E+08 | 1062 | 892  | 125150000 | 0.179296 | 0.005642201 |
| chr7 | 1.25E+08 | 1.25E+08 | 1061 | 869  | 125200000 | 0.215625 | 0.001175569 |
| chr7 | 1.25E+08 | 1.25E+08 | 990  | 866  | 125250000 | 0.12069  | 0.043688175 |
| chr7 | 1.25E+08 | 1.26E+08 | 1039 | 910  | 125450000 | 0.118885 | 0.04609602  |
| chr7 | 1.25E+08 | 1.26E+08 | 983  | 813  | 125500000 | 0.201564 | 0.002217017 |
| chr7 | 1.26E+08 | 1.26E+08 | 863  | 750  | 125550000 | 0.130098 | 0.032731892 |
| chr7 | 1.26E+08 | 1.26E+08 | 962  | 844  | 1.26E+08  | 0.116422 | 0.049554834 |
| chr7 | 1.27E+08 | 1.27E+08 | 1017 | 860  | 126950000 | 0.169539 | 0.008267359 |
| chr7 | 1.27E+08 | 1.27E+08 | 922  | 966  | 127150000 | -0.13963 | 0.023788168 |
| chr7 | 1.28E+08 | 1.28E+08 | 1053 | 1100 | 127750000 | -0.13537 | 0.027374254 |
| chr7 | 1.28E+08 | 1.28E+08 | 1054 | 1102 | 127800000 | -0.13662 | 0.026276426 |
| chr7 | 1.28E+08 | 1.28E+08 | 1081 | 1133 | 127850000 | -0.14015 | 0.023374856 |
| chr7 | 1.28E+08 | 1.28E+08 | 963  | 1006 | 127900000 | -0.13539 | 0.027352383 |
| chr7 | 1.28E+08 | 1.28E+08 | 889  | 981  | 127950000 | -0.21444 | 0.001196415 |
| chr7 | 1.28E+08 | 1.28E+08 | 916  | 1038 | 1.28E+08  | -0.25276 | 0.000175795 |
| chr7 | 1.28E+08 | 1.28E+08 | 152  | 163  | 128250000 | -0.17317 | 0.007039887 |
| chr7 | 1.28E+08 | 1.29E+08 | 1086 | 1139 | 128500000 | -0.14112 | 0.022632852 |
| chr7 | 1.29E+08 | 1.29E+08 | 1022 | 884  | 129100000 | 0.136905 | 0.026312008 |
| chr7 | 1.29E+08 | 1.3E+08  | 961  | 819  | 129500000 | 0.158301 | 0.012576361 |
| chr7 | 1.3E+08  | 1.3E+08  | 920  | 791  | 129550000 | 0.145584 | 0.019689842 |
| chr7 | 1.3E+08  | 1.3E+08  | 997  | 864  | 129800000 | 0.13419  | 0.028733081 |
| chr7 | 1.3E+08  | 1.3E+08  | 872  | 726  | 129850000 | 0.191987 | 0.003348577 |
| chr7 | 1.3E+08  | 1.3E+08  | 49   | 51   | 130200000 | -0.13009 | 0.032440146 |
| chr7 | 1.31E+08 | 1.31E+08 | 868  | 943  | 130700000 | -0.19193 | 0.003265941 |
| chr7 | 1.32E+08 | 1.32E+08 | 985  | 1065 | 131550000 | -0.18503 | 0.004364491 |
| chr7 | 1.32E+08 | 1.32E+08 | 1040 | 1133 | 131600000 | -0.19594 | 0.002750046 |
| chr7 | 1.32E+08 | 1.32E+08 | 981  | 830  | 131700000 | 0.16877  | 0.008514177 |
| chr7 | 1.32E+08 | 1.32E+08 | 1072 | 1149 | 132050000 | -0.17245 | 0.007243336 |
| chr7 | 1.32E+08 | 1.32E+08 | 1098 | 1153 | 132100000 | -0.14289 | 0.021319398 |
| chr7 | 1.32E+08 | 1.33E+08 | 1019 | 1062 | 132500000 | -0.132   | 0.030521482 |
| chr7 | 1.33E+08 | 1.33E+08 | 1066 | 934  | 132600000 | 0.118341 | 0.046842932 |
| chr7 | 1.33E+08 | 1.33E+08 | 1061 | 880  | 132650000 | 0.197477 | 0.002648747 |
| chr7 | 1.33E+08 | 1.33E+08 | 985  | 841  | 132700000 | 0.155646 | 0.013842254 |

|      |          |          |      |      |           |          |             |
|------|----------|----------|------|------|-----------|----------|-------------|
| chr7 | 1.35E+08 | 1.35E+08 | 925  | 1002 | 134850000 | -0.18773 | 0.00390071  |
| chr7 | 1.35E+08 | 1.35E+08 | 995  | 1125 | 134900000 | -0.24953 | 0.000208743 |
| chr7 | 1.35E+08 | 1.35E+08 | 1032 | 1088 | 134950000 | -0.14861 | 0.017508822 |
| chr7 | 1.35E+08 | 1.35E+08 | 921  | 803  | 135300000 | 0.125429 | 0.037845498 |
| chr7 | 1.35E+08 | 1.36E+08 | 1019 | 1054 | 135450000 | -0.12109 | 0.042835287 |
| chr7 | 1.36E+08 | 1.37E+08 | 845  | 735  | 136500000 | 0.128835 | 0.034055189 |
| chr7 | 1.37E+08 | 1.37E+08 | 1012 | 881  | 136550000 | 0.127624 | 0.035366095 |
| chr7 | 1.37E+08 | 1.37E+08 | 981  | 1032 | 1.37E+08  | -0.14549 | 0.019506006 |
| chr7 | 1.4E+08  | 1.4E+08  | 760  | 663  | 140150000 | 0.124619 | 0.038796768 |
| chr7 | 1.4E+08  | 1.4E+08  | 893  | 930  | 140350000 | -0.13094 | 0.031571132 |
| chr7 | 1.41E+08 | 1.41E+08 | 1063 | 915  | 140550000 | 0.143926 | 0.02083214  |
| chr7 | 1.41E+08 | 1.41E+08 | 993  | 860  | 140600000 | 0.135085 | 0.027915254 |
| chr7 | 1.41E+08 | 1.42E+08 | 885  | 931  | 141450000 | -0.14548 | 0.01951554  |
| chr7 | 1.42E+08 | 1.42E+08 | 895  | 939  | 141700000 | -0.14161 | 0.022259865 |
| chr7 | 1.42E+08 | 1.42E+08 | 511  | 569  | 142050000 | -0.22748 | 0.000641664 |
| chr7 | 1.42E+08 | 1.42E+08 | 408  | 421  | 142100000 | -0.11762 | 0.047505926 |
| chr7 | 1.42E+08 | 1.42E+08 | 710  | 621  | 142400000 | 0.120854 | 0.043474129 |
| chr7 | 1.43E+08 | 1.43E+08 | 1031 | 1074 | 143100000 | -0.13132 | 0.031192036 |
| chr7 | 1.43E+08 | 1.43E+08 | 11   | 13   | 143300000 | -0.31338 | 4.97E-06    |
| chr7 | 1.43E+08 | 1.43E+08 | 128  | 101  | 143400000 | 0.269417 | 7.56E-05    |
| chr7 | 1.43E+08 | 1.44E+08 | 134  | 114  | 143450000 | 0.160827 | 0.011466519 |
| chr7 | 1.43E+08 | 1.44E+08 | 115  | 98   | 143500000 | 0.158408 | 0.012527421 |
| chr7 | 1.44E+08 | 1.44E+08 | 428  | 362  | 143550000 | 0.169249 | 0.008359653 |
| chr7 | 1.44E+08 | 1.44E+08 | 888  | 938  | 143800000 | -0.1514  | 0.015871042 |
| chr7 | 1.44E+08 | 1.44E+08 | 688  | 725  | 143850000 | -0.14794 | 0.017918331 |
| chr7 | 1.44E+08 | 1.44E+08 | 53   | 33   | 143950000 | 0.611155 | 4.10E-17    |
| chr7 | 1.44E+08 | 1.44E+08 | 58   | 38   | 1.44E+08  | 0.537682 | 7.36E-14    |
| chr7 | 1.44E+08 | 1.44E+08 | 310  | 245  | 144050000 | 0.267115 | 8.59E-05    |
| chr7 | 1.45E+08 | 1.45E+08 | 1042 | 898  | 144750000 | 0.142196 | 0.022083432 |
| chr7 | 1.45E+08 | 1.45E+08 | 1026 | 894  | 145200000 | 0.126312 | 0.036831316 |
| chr7 | 1.45E+08 | 1.45E+08 | 999  | 829  | 145250000 | 0.196741 | 0.002734223 |
| chr7 | 1.46E+08 | 1.46E+08 | 1044 | 902  | 145550000 | 0.138551 | 0.024929615 |
| chr7 | 1.46E+08 | 1.46E+08 | 1057 | 914  | 145600000 | 0.137338 | 0.025942661 |
| chr7 | 1.46E+08 | 1.46E+08 | 985  | 861  | 145650000 | 0.121739 | 0.042335785 |
| chr7 | 1.46E+08 | 1.46E+08 | 816  | 689  | 145700000 | 0.171693 | 0.007609509 |
| chr7 | 1.46E+08 | 1.46E+08 | 884  | 730  | 145750000 | 0.203778 | 0.002010862 |
| chr7 | 1.46E+08 | 1.46E+08 | 1043 | 861  | 146150000 | 0.204282 | 0.00196643  |
| chr7 | 1.46E+08 | 1.46E+08 | 1062 | 892  | 146200000 | 0.179296 | 0.005642201 |
| chr7 | 1.46E+08 | 1.46E+08 | 1049 | 889  | 146400000 | 0.166388 | 0.009320172 |
| chr7 | 1.46E+08 | 1.47E+08 | 1029 | 866  | 146450000 | 0.176432 | 0.006322656 |
| chr7 | 1.47E+08 | 1.47E+08 | 994  | 863  | 147300000 | 0.131514 | 0.031299707 |
| chr7 | 1.48E+08 | 1.48E+08 | 921  | 993  | 147800000 | -0.18096 | 0.005156382 |
| chr7 | 1.48E+08 | 1.48E+08 | 994  | 1053 | 147850000 | -0.15556 | 0.01367645  |
| chr7 | 1.49E+08 | 1.49E+08 | 857  | 887  | 148900000 | -0.12201 | 0.041663749 |
| chr7 | 1.49E+08 | 1.49E+08 | 968  | 1013 | 148950000 | -0.13793 | 0.025170284 |
| chr7 | 1.49E+08 | 1.49E+08 | 952  | 993  | 149400000 | -0.1332  | 0.02936515  |
| chr7 | 1.49E+08 | 1.5E+08  | 1090 | 1251 | 149450000 | -0.27113 | 6.39E-05    |

|      |          |          |      |      |           |          |             |
|------|----------|----------|------|------|-----------|----------|-------------|
| chr7 | 1.49E+08 | 1.5E+08  | 1145 | 1316 | 149500000 | -0.27318 | 5.68E-05    |
| chr7 | 1.5E+08  | 1.5E+08  | 978  | 1060 | 149550000 | -0.18853 | 0.003771933 |
| chr7 | 1.5E+08  | 1.5E+08  | 431  | 465  | 149600000 | -0.18191 | 0.004960583 |
| chr7 | 1.5E+08  | 1.5E+08  | 94   | 103  | 149650000 | -0.20428 | 0.00190364  |
| chr7 | 1.5E+08  | 1.5E+08  | 114  | 153  | 149700000 | -0.49687 | 2.33E-12    |
| chr7 | 1.5E+08  | 1.5E+08  | 120  | 150  | 149750000 | -0.3943  | 1.58E-08    |
| chr7 | 1.5E+08  | 1.5E+08  | 118  | 123  | 149800000 | -0.13224 | 0.03028602  |
| chr7 | 1.5E+08  | 1.5E+08  | 135  | 146  | 149850000 | -0.18538 | 0.004301487 |
| chr7 | 1.5E+08  | 1.5E+08  | 115  | 125  | 149900000 | -0.19267 | 0.003165567 |
| chr7 | 1.5E+08  | 1.5E+08  | 70   | 90   | 149950000 | -0.43494 | 5.85E-10    |
| chr7 | 1.5E+08  | 1.5E+08  | 481  | 524  | 1.50E+08  | -0.1959  | 0.002754149 |
| chr7 | 1.5E+08  | 1.5E+08  | 959  | 1056 | 150050000 | -0.21138 | 0.001378916 |
| chr7 | 1.5E+08  | 1.5E+08  | 1007 | 1112 | 150100000 | -0.21546 | 0.001140557 |
| chr7 | 1.5E+08  | 1.5E+08  | 904  | 971  | 150150000 | -0.17552 | 0.006416739 |
| chr7 | 1.51E+08 | 1.51E+08 | 1038 | 1103 | 150600000 | -0.16    | 0.011628927 |
| chr7 | 1.51E+08 | 1.51E+08 | 1082 | 1353 | 150650000 | -0.39483 | 1.52E-08    |
| chr7 | 1.51E+08 | 1.51E+08 | 1104 | 1317 | 150700000 | -0.32689 | 2.06E-06    |
| chr7 | 1.51E+08 | 1.51E+08 | 1080 | 1234 | 150750000 | -0.26468 | 9.18E-05    |
| chr7 | 1.51E+08 | 1.51E+08 | 1086 | 1304 | 150800000 | -0.33629 | 1.09E-06    |
| chr7 | 1.51E+08 | 1.51E+08 | 1088 | 1273 | 150850000 | -0.29893 | 1.23E-05    |
| chr7 | 1.51E+08 | 1.51E+08 | 1096 | 1202 | 150900000 | -0.20556 | 0.001797463 |
| chr7 | 1.51E+08 | 1.51E+08 | 1058 | 1173 | 150950000 | -0.22124 | 0.000867989 |
| chr7 | 1.51E+08 | 1.51E+08 | 1028 | 1097 | 1.51E+08  | -0.1661  | 0.009253906 |
| chr7 | 1.51E+08 | 1.51E+08 | 1062 | 1116 | 151100000 | -0.14393 | 0.020579393 |
| chr7 | 1.51E+08 | 1.51E+08 | 920  | 971  | 151250000 | -0.15021 | 0.016552563 |
| chr7 | 1.51E+08 | 1.52E+08 | 1056 | 1119 | 151500000 | -0.15597 | 0.013473831 |
| chr7 | 1.52E+08 | 1.52E+08 | 1034 | 1143 | 151550000 | -0.21696 | 0.001063198 |
| chr7 | 1.52E+08 | 1.52E+08 | 1009 | 1074 | 151600000 | -0.16244 | 0.010620695 |
| chr7 | 1.52E+08 | 1.52E+08 | 882  | 932  | 151650000 | -0.15192 | 0.015579399 |
| chr7 | 1.52E+08 | 1.52E+08 | 783  | 839  | 151700000 | -0.17203 | 0.00736194  |
| chr7 | 1.52E+08 | 1.52E+08 | 883  | 918  | 151800000 | -0.12845 | 0.034156708 |
| chr7 | 1.52E+08 | 1.52E+08 | 778  | 679  | 152300000 | 0.123987 | 0.039551872 |
| chr7 | 1.52E+08 | 1.52E+08 | 774  | 657  | 152350000 | 0.164068 | 0.010168337 |
| chr7 | 1.53E+08 | 1.53E+08 | 576  | 598  | 152550000 | -0.12645 | 0.036362408 |
| chr7 | 1.53E+08 | 1.53E+08 | 939  | 990  | 152600000 | -0.14868 | 0.017467421 |
| chr7 | 1.53E+08 | 1.53E+08 | 907  | 1002 | 152650000 | -0.21608 | 0.001108155 |
| chr7 | 1.53E+08 | 1.53E+08 | 909  | 974  | 152700000 | -0.17201 | 0.007366838 |
| chr7 | 1.53E+08 | 1.54E+08 | 135  | 142  | 153450000 | -0.1453  | 0.01963133  |
| chr7 | 1.54E+08 | 1.54E+08 | 906  | 981  | 153600000 | -0.18711 | 0.004002318 |
| chr7 | 1.54E+08 | 1.54E+08 | 601  | 644  | 153650000 | -0.17207 | 0.007351251 |
| chr7 | 1.54E+08 | 1.54E+08 | 94   | 115  | 153750000 | -0.36327 | 1.64E-07    |
| chr7 | 1.54E+08 | 1.54E+08 | 91   | 130  | 153800000 | -0.58694 | 2.76E-16    |
| chr7 | 1.54E+08 | 1.54E+08 | 973  | 1014 | 1.54E+08  | -0.13192 | 0.030603432 |
| chr7 | 1.54E+08 | 1.54E+08 | 956  | 996  | 154150000 | -0.13151 | 0.031007963 |
| chr7 | 1.54E+08 | 1.54E+08 | 221  | 191  | 154300000 | 0.138102 | 0.025300333 |
| chr7 | 1.55E+08 | 1.55E+08 | 1035 | 1099 | 154600000 | -0.15893 | 0.012094524 |
| chr7 | 1.55E+08 | 1.55E+08 | 1006 | 1151 | 154650000 | -0.26663 | 8.23E-05    |

|      |          |          |      |      |           |          |             |
|------|----------|----------|------|------|-----------|----------|-------------|
| chr7 | 1.55E+08 | 1.55E+08 | 1027 | 1114 | 154700000 | -0.18968 | 0.003592869 |
| chr7 | 1.55E+08 | 1.55E+08 | 1015 | 1100 | 154900000 | -0.1884  | 0.003793231 |
| chr7 | 1.55E+08 | 1.55E+08 | 993  | 1056 | 154950000 | -0.16112 | 0.011157392 |
| chr7 | 1.55E+08 | 1.55E+08 | 1027 | 1059 | 1.55E+08  | -0.11664 | 0.048903418 |
| chr7 | 1.55E+08 | 1.55E+08 | 1003 | 1059 | 155150000 | -0.15075 | 0.016238427 |
| chr7 | 1.55E+08 | 1.55E+08 | 1027 | 1168 | 155200000 | -0.25798 | 0.000132684 |
| chr7 | 1.55E+08 | 1.55E+08 | 1056 | 1167 | 155250000 | -0.21657 | 0.001083113 |
| chr7 | 1.55E+08 | 1.55E+08 | 1093 | 1133 | 155300000 | -0.12423 | 0.038943468 |
| chr7 | 1.55E+08 | 1.55E+08 | 1066 | 1102 | 155350000 | -0.12029 | 0.043883072 |
| chr7 | 1.55E+08 | 1.56E+08 | 966  | 823  | 155450000 | 0.158759 | 0.012368579 |
| chr7 | 1.56E+08 | 1.56E+08 | 1060 | 1147 | 155550000 | -0.18617 | 0.004162343 |
| chr7 | 1.56E+08 | 1.56E+08 | 1070 | 1165 | 155600000 | -0.19509 | 0.002852424 |
| chr7 | 1.56E+08 | 1.56E+08 | 1085 | 1149 | 155650000 | -0.15506 | 0.013927534 |
| chr7 | 1.56E+08 | 1.56E+08 | 1084 | 1123 | 155750000 | -0.12336 | 0.039983227 |
| chr7 | 1.56E+08 | 1.56E+08 | 1050 | 1128 | 155800000 | -0.17575 | 0.006358607 |
| chr7 | 1.56E+08 | 1.56E+08 | 1073 | 1126 | 155850000 | -0.14193 | 0.022021496 |
| chr7 | 1.56E+08 | 1.56E+08 | 1036 | 1077 | 155900000 | -0.12837 | 0.034249548 |
| chr7 | 1.56E+08 | 1.56E+08 | 973  | 1026 | 156100000 | -0.14889 | 0.017336255 |
| chr7 | 1.56E+08 | 1.56E+08 | 1009 | 1059 | 156150000 | -0.14215 | 0.021858754 |
| chr7 | 1.56E+08 | 1.56E+08 | 1083 | 1143 | 156250000 | -0.15016 | 0.016578962 |
| chr7 | 1.56E+08 | 1.56E+08 | 1071 | 1146 | 156300000 | -0.17002 | 0.007960401 |
| chr7 | 1.56E+08 | 1.56E+08 | 977  | 1042 | 156350000 | -0.1653  | 0.009538519 |
| chr7 | 1.57E+08 | 1.57E+08 | 1046 | 912  | 156550000 | 0.125405 | 0.03787344  |
| chr7 | 1.57E+08 | 1.57E+08 | 1062 | 900  | 156600000 | 0.166415 | 0.009310497 |
| chr7 | 1.57E+08 | 1.57E+08 | 971  | 847  | 156650000 | 0.124738 | 0.038656171 |
| chr7 | 1.57E+08 | 1.57E+08 | 841  | 901  | 156750000 | -0.17179 | 0.007430434 |
| chr7 | 1.57E+08 | 1.57E+08 | 904  | 994  | 156800000 | -0.20929 | 0.001517319 |
| chr7 | 1.57E+08 | 1.57E+08 | 865  | 897  | 156850000 | -0.12478 | 0.038287128 |
| chr7 | 1.57E+08 | 1.57E+08 | 939  | 987  | 157050000 | -0.1443  | 0.020319984 |
| chr7 | 1.57E+08 | 1.57E+08 | 852  | 906  | 157100000 | -0.16103 | 0.011193313 |
| chr7 | 1.57E+08 | 1.57E+08 | 807  | 842  | 157150000 | -0.13362 | 0.02897049  |
| chr7 | 1.57E+08 | 1.57E+08 | 866  | 988  | 157200000 | -0.26252 | 0.000103462 |
| chr7 | 1.57E+08 | 1.57E+08 | 928  | 1045 | 157250000 | -0.24368 | 0.000283576 |
| chr7 | 1.57E+08 | 1.57E+08 | 1022 | 1163 | 157300000 | -0.25883 | 0.000126668 |
| chr7 | 1.57E+08 | 1.57E+08 | 994  | 1218 | 157350000 | -0.36557 | 1.38E-07    |
| chr7 | 1.57E+08 | 1.57E+08 | 989  | 1121 | 157400000 | -0.25312 | 0.000172471 |
| chr7 | 1.57E+08 | 1.58E+08 | 994  | 1054 | 157450000 | -0.15693 | 0.013013802 |
| chr7 | 1.57E+08 | 1.58E+08 | 925  | 1055 | 157500000 | -0.26209 | 0.000105924 |
| chr7 | 1.58E+08 | 1.58E+08 | 968  | 1171 | 157550000 | -0.34703 | 5.21E-07    |
| chr7 | 1.58E+08 | 1.58E+08 | 1067 | 1316 | 157600000 | -0.37497 | 6.91E-08    |
| chr7 | 1.58E+08 | 1.58E+08 | 1060 | 1220 | 157650000 | -0.27519 | 5.07E-05    |
| chr7 | 1.58E+08 | 1.58E+08 | 1037 | 1070 | 157700000 | -0.11757 | 0.047584785 |
| chr7 | 1.58E+08 | 1.58E+08 | 995  | 1056 | 157750000 | -0.15821 | 0.012417817 |
| chr7 | 1.58E+08 | 1.58E+08 | 990  | 1080 | 157800000 | -0.1979  | 0.002524585 |
| chr7 | 1.58E+08 | 1.58E+08 | 985  | 1091 | 157850000 | -0.21983 | 0.000928306 |
| chr7 | 1.58E+08 | 1.58E+08 | 1011 | 1088 | 157900000 | -0.17827 | 0.005750156 |
| chr7 | 1.58E+08 | 1.58E+08 | 964  | 1077 | 1.58E+08  | -0.23228 | 0.000506042 |

|       |          |          |      |      |           |          |             |
|-------|----------|----------|------|------|-----------|----------|-------------|
| chr7  | 1.58E+08 | 1.58E+08 | 978  | 1150 | 158050000 | -0.3061  | 7.89E-06    |
| chr7  | 1.58E+08 | 1.58E+08 | 873  | 1050 | 158100000 | -0.33871 | 9.27E-07    |
| chr7  | 1.58E+08 | 1.58E+08 | 829  | 1003 | 158150000 | -0.34725 | 5.13E-07    |
| chr7  | 1.58E+08 | 1.58E+08 | 930  | 1082 | 158200000 | -0.29077 | 2.03E-05    |
| chr7  | 1.58E+08 | 1.58E+08 | 928  | 1094 | 158250000 | -0.30979 | 6.25E-06    |
| chr7  | 1.58E+08 | 1.58E+08 | 979  | 1126 | 158300000 | -0.2742  | 5.36E-05    |
| chr7  | 1.58E+08 | 1.58E+08 | 1001 | 1055 | 158350000 | -0.14817 | 0.017776255 |
| chr7  | 1.58E+08 | 1.59E+08 | 904  | 954  | 158500000 | -0.15004 | 0.016652428 |
| chr7  | 1.59E+08 | 1.59E+08 | 922  | 952  | 158550000 | -0.11857 | 0.046196797 |
| chr7  | 1.59E+08 | 1.59E+08 | 980  | 1046 | 158750000 | -0.1664  | 0.009146844 |
| chr7  | 1.59E+08 | 1.59E+08 | 1005 | 1087 | 158800000 | -0.18553 | 0.004275271 |
| chr20 | 250001   | 350000   | 959  | 989  | 3.00E+05  | -0.11681 | 0.048655106 |
| chr20 | 400001   | 500000   | 911  | 989  | 450000    | -0.19089 | 0.00341406  |
| chr20 | 450001   | 550000   | 905  | 965  | 5.00E+05  | -0.16498 | 0.009652407 |
| chr20 | 500001   | 600000   | 951  | 1000 | 550000    | -0.14485 | 0.019935858 |
| chr20 | 550001   | 650000   | 1007 | 1087 | 6.00E+05  | -0.18266 | 0.004811674 |
| chr20 | 600001   | 700000   | 1056 | 1156 | 650000    | -0.2029  | 0.002024748 |
| chr20 | 650001   | 750000   | 988  | 1072 | 7.00E+05  | -0.19009 | 0.00353134  |
| chr20 | 700001   | 800000   | 834  | 877  | 750000    | -0.1449  | 0.019903978 |
| chr20 | 750001   | 850000   | 853  | 931  | 8.00E+05  | -0.19861 | 0.002447978 |
| chr20 | 800001   | 900000   | 974  | 1089 | 850000    | -0.23338 | 0.000479076 |
| chr20 | 850001   | 950000   | 1017 | 1055 | 9.00E+05  | -0.1253  | 0.037683926 |
| chr20 | 950001   | 1050000  | 1062 | 1098 | 1.00E+06  | -0.12047 | 0.043649993 |
| chr20 | 1150001  | 1250000  | 966  | 1026 | 1200000   | -0.15931 | 0.01192887  |
| chr20 | 1200001  | 1300000  | 997  | 1093 | 1250000   | -0.205   | 0.001843417 |
| chr20 | 1250001  | 1350000  | 1094 | 1144 | 1300000   | -0.13685 | 0.026083021 |
| chr20 | 1400001  | 1500000  | 1022 | 1147 | 1450000   | -0.23884 | 0.00036363  |
| chr20 | 1450001  | 1550000  | 938  | 1046 | 1500000   | -0.22959 | 0.000578239 |
| chr20 | 1600001  | 1700000  | 977  | 1007 | 1650000   | -0.116   | 0.049819332 |
| chr20 | 1700001  | 1800000  | 1006 | 1038 | 1750000   | -0.11755 | 0.047611148 |
| chr20 | 1750001  | 1850000  | 1092 | 1157 | 1800000   | -0.15579 | 0.013563978 |
| chr20 | 1800001  | 1900000  | 1118 | 1204 | 1850000   | -0.17929 | 0.00551887  |
| chr20 | 1850001  | 1950000  | 1086 | 1175 | 1900000   | -0.18601 | 0.004190896 |
| chr20 | 2750001  | 2850000  | 953  | 1008 | 2800000   | -0.15332 | 0.014823375 |
| chr20 | 3000001  | 3100000  | 910  | 945  | 3050000   | -0.12682 | 0.03594536  |
| chr20 | 3650001  | 3750000  | 1069 | 1152 | 3700000   | -0.18025 | 0.005307937 |
| chr20 | 3700001  | 3800000  | 1005 | 1086 | 3750000   | -0.1842  | 0.004516556 |
| chr20 | 3750001  | 3850000  | 857  | 929  | 3800000   | -0.18876 | 0.00373636  |
| chr20 | 3800001  | 3900000  | 817  | 845  | 3850000   | -0.12099 | 0.042971673 |
| chr20 | 4050001  | 4150000  | 965  | 1040 | 4100000   | -0.18035 | 0.005285647 |
| chr20 | 4100001  | 4200000  | 938  | 998  | 4150000   | -0.16182 | 0.010867571 |
| chr20 | 5050001  | 5150000  | 966  | 834  | 5100000   | 0.139604 | 0.024077088 |
| chr20 | 5550001  | 5650000  | 749  | 791  | 5600000   | -0.15108 | 0.016049654 |
| chr20 | 6050001  | 6150000  | 931  | 979  | 6100000   | -0.1449  | 0.019905183 |
| chr20 | 6250001  | 6350000  | 937  | 819  | 6300000   | 0.121814 | 0.042240271 |
| chr20 | 6450001  | 6550000  | 1104 | 940  | 6500000   | 0.159636 | 0.011978948 |
| chr20 | 6700001  | 6800000  | 1060 | 1099 | 6750000   | -0.1245  | 0.038618945 |

|       |          |          |      |      |          |          |             |
|-------|----------|----------|------|------|----------|----------|-------------|
| chr20 | 6850001  | 6950000  | 1041 | 906  | 6900000  | 0.128015 | 0.034937813 |
| chr20 | 7100001  | 7200000  | 1046 | 914  | 7150000  | 0.122245 | 0.041695323 |
| chr20 | 7150001  | 7250000  | 1125 | 949  | 7200000  | 0.173073 | 0.007212818 |
| chr20 | 7200001  | 7300000  | 1092 | 936  | 7250000  | 0.150021 | 0.016892961 |
| chr20 | 7600001  | 7700000  | 1075 | 942  | 7650000  | 0.118166 | 0.04708557  |
| chr20 | 7650001  | 7750000  | 1098 | 926  | 7700000  | 0.173422 | 0.007115445 |
| chr20 | 7700001  | 7800000  | 1009 | 872  | 7750000  | 0.138154 | 0.025256794 |
| chr20 | 8550001  | 8650000  | 995  | 860  | 8600000  | 0.137988 | 0.025395155 |
| chr20 | 8600001  | 8700000  | 1018 | 843  | 8650000  | 0.199761 | 0.002398921 |
| chr20 | 8650001  | 8750000  | 942  | 817  | 8700000  | 0.133019 | 0.029833582 |
| chr20 | 9100001  | 9200000  | 1074 | 889  | 9150000  | 0.200367 | 0.002336361 |
| chr20 | 9150001  | 9250000  | 1052 | 917  | 9200000  | 0.125769 | 0.037452352 |
| chr20 | 10850001 | 10950000 | 1098 | 898  | 10900000 | 0.217719 | 0.001066427 |
| chr20 | 10900001 | 11000000 | 1121 | 971  | 10950000 | 0.134871 | 0.028109022 |
| chr20 | 11050001 | 11150000 | 1035 | 865  | 11100000 | 0.186487 | 0.004212687 |
| chr20 | 11100001 | 11200000 | 1034 | 907  | 11150000 | 0.11669  | 0.049168966 |
| chr20 | 11750001 | 11850000 | 1059 | 928  | 11800000 | 0.118134 | 0.047129718 |
| chr20 | 12400001 | 12500000 | 909  | 772  | 12450000 | 0.163308 | 0.01046091  |
| chr20 | 13300001 | 13400000 | 1003 | 864  | 13350000 | 0.142847 | 0.021605691 |
| chr20 | 13500001 | 13600000 | 902  | 766  | 13550000 | 0.163411 | 0.010420641 |
| chr20 | 13550001 | 13650000 | 844  | 713  | 13600000 | 0.170969 | 0.007825341 |
| chr20 | 14000001 | 14100000 | 984  | 777  | 14050000 | 0.268372 | 8.01E-05    |
| chr20 | 14200001 | 14300000 | 931  | 804  | 14250000 | 0.139214 | 0.024389911 |
| chr20 | 14250001 | 14350000 | 969  | 802  | 14300000 | 0.200523 | 0.002320513 |
| chr20 | 14400001 | 14500000 | 965  | 814  | 14450000 | 0.173128 | 0.007197353 |
| chr20 | 14450001 | 14550000 | 1089 | 882  | 14500000 | 0.231782 | 0.000543452 |
| chr20 | 15200001 | 15300000 | 1057 | 921  | 15250000 | 0.126331 | 0.036810508 |
| chr20 | 15950001 | 16050000 | 1086 | 923  | 1.60E+07 | 0.16225  | 0.010879988 |
| chr20 | 16000001 | 16100000 | 1124 | 942  | 16050000 | 0.182471 | 0.004964837 |
| chr20 | 16500001 | 16600000 | 967  | 846  | 16550000 | 0.120486 | 0.043954248 |
| chr20 | 17000001 | 17100000 | 966  | 996  | 17050000 | -0.11649 | 0.049110311 |
| chr20 | 17050001 | 17150000 | 926  | 986  | 17100000 | -0.16295 | 0.01042092  |
| chr20 | 17100001 | 17200000 | 968  | 998  | 17150000 | -0.1164  | 0.049239796 |
| chr20 | 17150001 | 17250000 | 990  | 1058 | 17200000 | -0.16821 | 0.008535402 |
| chr20 | 17600001 | 17700000 | 1089 | 1162 | 17650000 | -0.16598 | 0.009295192 |
| chr20 | 17650001 | 17750000 | 1027 | 1076 | 17700000 | -0.13961 | 0.023799706 |
| chr20 | 17700001 | 17800000 | 1009 | 1053 | 17750000 | -0.13395 | 0.028665213 |
| chr20 | 17750001 | 17850000 | 1037 | 1084 | 17800000 | -0.13632 | 0.026536647 |
| chr20 | 17800001 | 17900000 | 994  | 1029 | 17850000 | -0.1223  | 0.041303746 |
| chr20 | 17850001 | 17950000 | 961  | 1013 | 17900000 | -0.1484  | 0.01763747  |
| chr20 | 17900001 | 18000000 | 864  | 971  | 17950000 | -0.24081 | 0.00032877  |
| chr20 | 17950001 | 18050000 | 823  | 927  | 1.80E+07 | -0.24405 | 0.000278175 |
| chr20 | 18450001 | 18550000 | 946  | 782  | 18500000 | 0.2023   | 0.002146486 |
| chr20 | 18900001 | 19000000 | 956  | 995  | 18950000 | -0.13006 | 0.032470571 |
| chr20 | 18950001 | 19050000 | 941  | 1020 | 1.90E+07 | -0.18867 | 0.003749082 |
| chr20 | 19600001 | 19700000 | 1011 | 1087 | 19650000 | -0.17694 | 0.006063962 |
| chr20 | 19650001 | 19750000 | 1013 | 1081 | 19700000 | -0.1661  | 0.00925071  |

|       |          |          |      |      |          |          |             |
|-------|----------|----------|------|------|----------|----------|-------------|
| chr20 | 20000001 | 20100000 | 1021 | 894  | 20050000 | 0.119264 | 0.045581659 |
| chr20 | 20850001 | 20950000 | 994  | 1067 | 20900000 | -0.17461 | 0.006651181 |
| chr20 | 20900001 | 21000000 | 1069 | 1104 | 20950000 | -0.11885 | 0.045809262 |
| chr20 | 21100001 | 21200000 | 1032 | 905  | 21150000 | 0.117082 | 0.048609211 |
| chr20 | 21600001 | 21700000 | 994  | 1025 | 21650000 | -0.11668 | 0.048846379 |
| chr20 | 21950001 | 22050000 | 987  | 832  | 2.20E+07 | 0.174095 | 0.006931035 |
| chr20 | 22700001 | 22800000 | 1019 | 1078 | 22750000 | -0.15357 | 0.014688449 |
| chr20 | 22750001 | 22850000 | 1022 | 1069 | 22800000 | -0.13724 | 0.025748563 |
| chr20 | 22950001 | 23050000 | 951  | 1027 | 2.30E+07 | -0.18329 | 0.004688818 |
| chr20 | 23000001 | 23100000 | 1100 | 1162 | 23050000 | -0.15148 | 0.015827088 |
| chr20 | 23200001 | 23300000 | 1047 | 1087 | 23250000 | -0.12646 | 0.036346801 |
| chr20 | 23350001 | 23450000 | 973  | 1022 | 23400000 | -0.14326 | 0.021053973 |
| chr20 | 23400001 | 23500000 | 933  | 965  | 23450000 | -0.12102 | 0.042924344 |
| chr20 | 23500001 | 23600000 | 888  | 937  | 23550000 | -0.14986 | 0.016756448 |
| chr20 | 24100001 | 24200000 | 1063 | 1126 | 24150000 | -0.15544 | 0.013737098 |
| chr20 | 24900001 | 25000000 | 961  | 1021 | 24950000 | -0.15975 | 0.01173751  |
| chr20 | 24950001 | 25050000 | 1090 | 1208 | 2.50E+07 | -0.22066 | 0.000892005 |
| chr20 | 25000001 | 25100000 | 994  | 1104 | 25050000 | -0.22379 | 0.000767519 |
| chr20 | 25150001 | 25250000 | 879  | 997  | 25200000 | -0.2541  | 0.000163586 |
| chr20 | 25200001 | 25300000 | 979  | 1070 | 25250000 | -0.2006  | 0.002242394 |
| chr20 | 25400001 | 25500000 | 960  | 1002 | 25450000 | -0.13415 | 0.028483048 |
| chr20 | 25450001 | 25550000 | 946  | 999  | 25500000 | -0.15102 | 0.016087987 |
| chr20 | 25750001 | 25850000 | 146  | 164  | 25800000 | -0.2401  | 0.000341004 |
| chr20 | 25850001 | 25950000 | 244  | 206  | 25900000 | 0.171865 | 0.007559136 |
| chr20 | 26100001 | 26200000 | 728  | 752  | 26150000 | -0.11917 | 0.04538053  |
| chr20 | 26150001 | 26250000 | 789  | 820  | 26200000 | -0.12797 | 0.034676993 |
| chr20 | 29400001 | 29500000 | 168  | 183  | 29450000 | -0.19575 | 0.002771797 |
| chr20 | 29450001 | 29550000 | 229  | 296  | 29500000 | -0.44262 | 3.04E-10    |
| chr20 | 29650001 | 29750000 | 268  | 307  | 29700000 | -0.26838 | 7.46E-05    |
| chr20 | 29750001 | 29850000 | 658  | 896  | 29800000 | -0.51778 | 3.16E-13    |
| chr20 | 29800001 | 29900000 | 1112 | 1364 | 29850000 | -0.36706 | 1.24E-07    |
| chr20 | 29850001 | 29950000 | 857  | 887  | 29900000 | -0.12201 | 0.041663749 |
| chr20 | 30050001 | 30150000 | 886  | 938  | 30100000 | -0.15465 | 0.014130952 |
| chr20 | 30150001 | 30250000 | 767  | 798  | 30200000 | -0.12953 | 0.033012989 |
| chr20 | 30250001 | 30350000 | 964  | 840  | 30300000 | 0.126272 | 0.03687698  |
| chr20 | 30350001 | 30450000 | 1017 | 1162 | 30400000 | -0.26466 | 9.19E-05    |
| chr20 | 30400001 | 30500000 | 1077 | 1180 | 30450000 | -0.20414 | 0.00191588  |
| chr20 | 30450001 | 30550000 | 984  | 1018 | 30500000 | -0.12138 | 0.042466831 |
| chr20 | 30700001 | 30800000 | 890  | 930  | 30750000 | -0.1358  | 0.026995126 |
| chr20 | 31000001 | 31100000 | 1042 | 1121 | 31050000 | -0.1778  | 0.005858362 |
| chr20 | 31050001 | 31150000 | 1033 | 1105 | 31100000 | -0.16958 | 0.00809776  |
| chr20 | 31100001 | 31200000 | 1076 | 1183 | 31150000 | -0.20914 | 0.00152783  |
| chr20 | 31150001 | 31250000 | 1077 | 1157 | 31200000 | -0.17574 | 0.006360407 |
| chr20 | 31300001 | 31400000 | 887  | 765  | 31350000 | 0.141103 | 0.022906788 |
| chr20 | 31550001 | 31650000 | 1118 | 1155 | 31600000 | -0.11934 | 0.045139767 |
| chr20 | 31850001 | 31950000 | 1045 | 1084 | 31900000 | -0.12523 | 0.037755489 |
| chr20 | 32200001 | 32300000 | 948  | 1079 | 32250000 | -0.25911 | 0.000124748 |

|       |          |          |      |      |          |          |             |
|-------|----------|----------|------|------|----------|----------|-------------|
| chr20 | 32250001 | 32350000 | 888  | 1015 | 32300000 | -0.26522 | 8.91E-05    |
| chr20 | 32650001 | 32750000 | 832  | 889  | 32700000 | -0.16797 | 0.008614124 |
| chr20 | 32700001 | 32800000 | 742  | 843  | 32750000 | -0.25649 | 0.000143861 |
| chr20 | 32750001 | 32850000 | 765  | 837  | 32800000 | -0.20214 | 0.002094738 |
| chr20 | 33100001 | 33200000 | 970  | 1020 | 33150000 | -0.14488 | 0.019915549 |
| chr20 | 33700001 | 33800000 | 728  | 782  | 33750000 | -0.1756  | 0.006395982 |
| chr20 | 34000001 | 34100000 | 895  | 942  | 34050000 | -0.14621 | 0.019027365 |
| chr20 | 34300001 | 34400000 | 827  | 707  | 34350000 | 0.153805 | 0.014783371 |
| chr20 | 34350001 | 34450000 | 824  | 721  | 34400000 | 0.120273 | 0.044234652 |
| chr20 | 34450001 | 34550000 | 828  | 857  | 34500000 | -0.12204 | 0.041631538 |
| chr20 | 34600001 | 34700000 | 858  | 886  | 34650000 | -0.1187  | 0.046012981 |
| chr20 | 34650001 | 34750000 | 980  | 1012 | 34700000 | -0.11873 | 0.045976646 |
| chr20 | 34900001 | 35000000 | 571  | 616  | 34950000 | -0.18181 | 0.004981529 |
| chr20 | 35050001 | 35150000 | 969  | 1024 | 35100000 | -0.15202 | 0.01552646  |
| chr20 | 35100001 | 35200000 | 936  | 965  | 35150000 | -0.11639 | 0.049257636 |
| chr20 | 35950001 | 36050000 | 1076 | 1112 | 3.60E+07 | -0.11985 | 0.044462621 |
| chr20 | 36000001 | 36100000 | 1109 | 1187 | 36050000 | -0.17043 | 0.007834344 |
| chr20 | 36050001 | 36150000 | 1087 | 1142 | 36100000 | -0.14358 | 0.020820966 |
| chr20 | 36100001 | 36200000 | 995  | 1027 | 36150000 | -0.11804 | 0.046924308 |
| chr20 | 36400001 | 36500000 | 1063 | 1108 | 36450000 | -0.13219 | 0.030339625 |
| chr20 | 36500001 | 36600000 | 996  | 1046 | 36550000 | -0.14304 | 0.021210633 |
| chr20 | 37100001 | 37200000 | 1010 | 872  | 37150000 | 0.139583 | 0.024093483 |
| chr20 | 37150001 | 37250000 | 1040 | 911  | 37200000 | 0.118689 | 0.046364775 |
| chr20 | 37200001 | 37300000 | 986  | 1020 | 37250000 | -0.12128 | 0.04259223  |
| chr20 | 37250001 | 37350000 | 1042 | 1122 | 37300000 | -0.17909 | 0.005563079 |
| chr20 | 37450001 | 37550000 | 1005 | 1040 | 37500000 | -0.12176 | 0.041981267 |
| chr20 | 37700001 | 37800000 | 1081 | 1147 | 37750000 | -0.15787 | 0.012574409 |
| chr20 | 37800001 | 37900000 | 1110 | 1162 | 37850000 | -0.13842 | 0.024761202 |
| chr20 | 38350001 | 38450000 | 986  | 774  | 38400000 | 0.276882 | 4.96E-05    |
| chr20 | 38400001 | 38500000 | 1093 | 871  | 38450000 | 0.255177 | 0.000164068 |
| chr20 | 38600001 | 38700000 | 982  | 855  | 38650000 | 0.127427 | 0.035582832 |
| chr20 | 38950001 | 39050000 | 1093 | 959  | 3.90E+07 | 0.116319 | 0.04970418  |
| chr20 | 39200001 | 39300000 | 1020 | 1061 | 39250000 | -0.12923 | 0.033334051 |
| chr20 | 39450001 | 39550000 | 1059 | 1121 | 39500000 | -0.15446 | 0.01423171  |
| chr20 | 39600001 | 39700000 | 931  | 975  | 39650000 | -0.13899 | 0.024296703 |
| chr20 | 40250001 | 40350000 | 954  | 1047 | 40300000 | -0.20657 | 0.001717276 |
| chr20 | 40550001 | 40650000 | 1018 | 1051 | 40600000 | -0.1184  | 0.046430055 |
| chr20 | 40650001 | 40750000 | 1068 | 1124 | 40700000 | -0.1461  | 0.019099025 |
| chr20 | 40700001 | 40800000 | 1013 | 1101 | 40750000 | -0.19255 | 0.003181016 |
| chr20 | 41650001 | 41750000 | 1102 | 947  | 41700000 | 0.146316 | 0.019203006 |
| chr20 | 41700001 | 41800000 | 1061 | 931  | 41750000 | 0.1162   | 0.049876955 |
| chr20 | 42400001 | 42500000 | 908  | 946  | 42450000 | -0.13152 | 0.03099533  |
| chr20 | 42600001 | 42700000 | 1043 | 1110 | 42650000 | -0.16219 | 0.010719223 |
| chr20 | 42650001 | 42750000 | 1001 | 1049 | 42700000 | -0.13994 | 0.023538406 |
| chr20 | 42700001 | 42800000 | 992  | 1093 | 42750000 | -0.21225 | 0.001324376 |
| chr20 | 42750001 | 42850000 | 971  | 1113 | 42800000 | -0.26928 | 7.09E-05    |
| chr20 | 42800001 | 42900000 | 956  | 1066 | 42850000 | -0.2295  | 0.000581044 |



|       |          |          |      |      |          |          |             |
|-------|----------|----------|------|------|----------|----------|-------------|
| chr20 | 43100001 | 43200000 | 888  | 942  | 43150000 | -0.15754 | 0.012727578 |
| chr20 | 43300001 | 43400000 | 1052 | 1105 | 43350000 | -0.14328 | 0.021033821 |
| chr20 | 43350001 | 43450000 | 1133 | 1175 | 43400000 | -0.12488 | 0.03816357  |
| chr20 | 43500001 | 43600000 | 935  | 988  | 43550000 | -0.15192 | 0.015583062 |
| chr20 | 43700001 | 43800000 | 1048 | 1114 | 43750000 | -0.16048 | 0.011422608 |
| chr20 | 43850001 | 43950000 | 1002 | 1099 | 43900000 | -0.20568 | 0.001787789 |
| chr20 | 43900001 | 44000000 | 992  | 1100 | 43950000 | -0.22146 | 0.000858564 |
| chr20 | 43950001 | 44050000 | 1005 | 1059 | 4.40E+07 | -0.14788 | 0.017959121 |
| chr20 | 44500001 | 44600000 | 943  | 1020 | 44550000 | -0.18561 | 0.004260573 |
| chr20 | 44550001 | 44650000 | 980  | 1073 | 44600000 | -0.20317 | 0.002000976 |
| chr20 | 44600001 | 44700000 | 1022 | 1117 | 44650000 | -0.20061 | 0.002242003 |
| chr20 | 44650001 | 44750000 | 1036 | 1155 | 44700000 | -0.22924 | 0.000588425 |
| chr20 | 44700001 | 44800000 | 1057 | 1126 | 44750000 | -0.1636  | 0.010167626 |
| chr20 | 44750001 | 44850000 | 1071 | 1162 | 44800000 | -0.19002 | 0.003541861 |
| chr20 | 44800001 | 44900000 | 1073 | 1275 | 44850000 | -0.32122 | 2.99E-06    |
| chr20 | 44850001 | 44950000 | 1122 | 1315 | 44900000 | -0.30136 | 1.06E-05    |
| chr20 | 44900001 | 45000000 | 1104 | 1191 | 44950000 | -0.18181 | 0.004982823 |
| chr20 | 44950001 | 45050000 | 958  | 1024 | 4.50E+07 | -0.16849 | 0.008444436 |
| chr20 | 45000001 | 45100000 | 938  | 992  | 45050000 | -0.15312 | 0.014927197 |
| chr20 | 45050001 | 45150000 | 1019 | 1099 | 45100000 | -0.18141 | 0.005063897 |
| chr20 | 45100001 | 45200000 | 1054 | 1131 | 45150000 | -0.1741  | 0.006788685 |
| chr20 | 45200001 | 45300000 | 1087 | 1123 | 45250000 | -0.11938 | 0.045094922 |
| chr20 | 45250001 | 45350000 | 994  | 1105 | 45300000 | -0.2251  | 0.000720483 |
| chr20 | 45300001 | 45400000 | 1018 | 1094 | 45350000 | -0.17625 | 0.006234055 |
| chr20 | 46250001 | 46350000 | 1004 | 1096 | 46300000 | -0.19886 | 0.002420976 |
| chr20 | 46300001 | 46400000 | 1019 | 1079 | 46350000 | -0.15491 | 0.013999478 |
| chr20 | 46350001 | 46450000 | 956  | 994  | 46400000 | -0.12861 | 0.033991321 |
| chr20 | 46400001 | 46500000 | 726  | 768  | 46450000 | -0.15351 | 0.014723378 |
| chr20 | 46700001 | 46800000 | 993  | 1031 | 46750000 | -0.12655 | 0.036247347 |
| chr20 | 46750001 | 46850000 | 1055 | 1134 | 46800000 | -0.17655 | 0.006159385 |
| chr20 | 46950001 | 47050000 | 994  | 1028 | 4.70E+07 | -0.12089 | 0.043091814 |
| chr20 | 47000001 | 47100000 | 1018 | 1054 | 47050000 | -0.12251 | 0.041038726 |
| chr20 | 47050001 | 47150000 | 899  | 973  | 47100000 | -0.18649 | 0.004107706 |
| chr20 | 47100001 | 47200000 | 858  | 988  | 47150000 | -0.27591 | 4.86E-05    |
| chr20 | 47150001 | 47250000 | 944  | 1094 | 47200000 | -0.28513 | 2.84E-05    |
| chr20 | 47200001 | 47300000 | 1047 | 1136 | 47250000 | -0.19007 | 0.003534412 |
| chr20 | 47350001 | 47450000 | 1085 | 1126 | 47400000 | -0.12588 | 0.037004831 |
| chr20 | 47550001 | 47650000 | 932  | 780  | 47600000 | 0.184484 | 0.004574011 |
| chr20 | 48000001 | 48100000 | 1055 | 1093 | 48050000 | -0.12342 | 0.039913443 |
| chr20 | 48150001 | 48250000 | 1054 | 1092 | 48200000 | -0.12347 | 0.039855493 |
| chr20 | 48500001 | 48600000 | 858  | 900  | 48550000 | -0.14132 | 0.022478356 |
| chr20 | 48550001 | 48650000 | 813  | 907  | 48600000 | -0.23022 | 0.000560685 |
| chr20 | 48600001 | 48700000 | 839  | 905  | 48650000 | -0.18162 | 0.00502082  |
| chr20 | 48750001 | 48850000 | 981  | 1037 | 48800000 | -0.15246 | 0.015283398 |
| chr20 | 48900001 | 49000000 | 1032 | 1125 | 48950000 | -0.19685 | 0.002642659 |
| chr20 | 48950001 | 49050000 | 852  | 912  | 4.90E+07 | -0.17055 | 0.007798014 |
| chr20 | 49250001 | 49350000 | 841  | 873  | 49300000 | -0.12625 | 0.036589735 |

|       |          |          |      |      |          |          |             |
|-------|----------|----------|------|------|----------|----------|-------------|
| chr20 | 49800001 | 49900000 | 1034 | 1071 | 49850000 | -0.12309 | 0.040314868 |
| chr20 | 49850001 | 49950000 | 1079 | 1161 | 49900000 | -0.17804 | 0.005801746 |
| chr20 | 49900001 | 50000000 | 1065 | 1181 | 49950000 | -0.22153 | 0.000855935 |
| chr20 | 49950001 | 50050000 | 1060 | 1095 | 5.00E+07 | -0.11924 | 0.045282734 |
| chr20 | 50250001 | 50350000 | 846  | 927  | 50300000 | -0.20428 | 0.00190364  |
| chr20 | 50300001 | 50400000 | 827  | 876  | 50350000 | -0.15542 | 0.013747865 |
| chr20 | 50550001 | 50650000 | 807  | 705  | 50600000 | 0.122574 | 0.041283832 |
| chr20 | 51850001 | 51950000 | 1026 | 1090 | 51900000 | -0.15967 | 0.011770943 |
| chr20 | 51950001 | 52050000 | 1004 | 1043 | 5.20E+07 | -0.12735 | 0.035354251 |
| chr20 | 52000001 | 52100000 | 830  | 859  | 52050000 | -0.12192 | 0.041780095 |
| chr20 | 52100001 | 52200000 | 865  | 759  | 52150000 | 0.116228 | 0.049835329 |
| chr20 | 52450001 | 52550000 | 1034 | 896  | 52500000 | 0.134294 | 0.028637613 |
| chr20 | 52850001 | 52950000 | 1005 | 881  | 52900000 | 0.11761  | 0.047862059 |
| chr20 | 52900001 | 53000000 | 1064 | 932  | 52950000 | 0.118725 | 0.046315858 |
| chr20 | 53900001 | 54000000 | 1013 | 878  | 53950000 | 0.13397  | 0.028937978 |
| chr20 | 54350001 | 54450000 | 935  | 795  | 54400000 | 0.16164  | 0.011128259 |
| chr20 | 54400001 | 54500000 | 895  | 783  | 54450000 | 0.120504 | 0.043931751 |
| chr20 | 54600001 | 54700000 | 892  | 921  | 54650000 | -0.11853 | 0.046248087 |
| chr20 | 54650001 | 54750000 | 990  | 1039 | 54700000 | -0.14207 | 0.021918787 |
| chr20 | 55400001 | 55500000 | 977  | 1039 | 55450000 | -0.16114 | 0.011148706 |
| chr20 | 55450001 | 55550000 | 935  | 1019 | 55500000 | -0.19649 | 0.002685053 |
| chr20 | 55600001 | 55700000 | 1080 | 1147 | 55650000 | -0.15921 | 0.011973535 |
| chr20 | 55700001 | 55800000 | 1074 | 1123 | 55750000 | -0.13674 | 0.026177769 |
| chr20 | 55750001 | 55850000 | 1059 | 1137 | 55800000 | -0.1749  | 0.006576051 |
| chr20 | 55800001 | 55900000 | 1040 | 1082 | 55850000 | -0.12949 | 0.033060148 |
| chr20 | 55900001 | 56000000 | 1057 | 1097 | 55950000 | -0.12596 | 0.036917445 |
| chr20 | 55950001 | 56050000 | 1102 | 1274 | 5.60E+07 | -0.28161 | 3.49E-05    |
| chr20 | 56000001 | 56100000 | 1028 | 1135 | 56050000 | -0.21522 | 0.001153495 |
| chr20 | 56050001 | 56150000 | 1014 | 1047 | 56100000 | -0.11858 | 0.046184499 |
| chr20 | 56100001 | 56200000 | 1063 | 1171 | 56150000 | -0.21197 | 0.001341742 |
| chr20 | 56150001 | 56250000 | 1012 | 1159 | 56200000 | -0.26804 | 7.61E-05    |
| chr20 | 56200001 | 56300000 | 1040 | 1214 | 56250000 | -0.29556 | 1.52E-05    |
| chr20 | 56250001 | 56350000 | 1064 | 1170 | 56300000 | -0.20938 | 0.001511275 |
| chr20 | 56300001 | 56400000 | 1045 | 1082 | 56350000 | -0.12257 | 0.040963687 |
| chr20 | 56450001 | 56550000 | 1140 | 1186 | 56500000 | -0.12944 | 0.033109022 |
| chr20 | 56700001 | 56800000 | 1061 | 1153 | 56750000 | -0.19234 | 0.003210002 |
| chr20 | 57050001 | 57150000 | 1096 | 1191 | 57100000 | -0.1923  | 0.003215794 |
| chr20 | 57100001 | 57200000 | 1104 | 1167 | 57150000 | -0.15244 | 0.015297802 |
| chr20 | 57250001 | 57350000 | 1039 | 1132 | 57300000 | -0.19605 | 0.002736498 |
| chr20 | 57300001 | 57400000 | 1055 | 1129 | 57350000 | -0.17017 | 0.007913099 |
| chr20 | 57850001 | 57950000 | 1047 | 1095 | 57900000 | -0.13704 | 0.025916241 |
| chr20 | 57900001 | 58000000 | 1075 | 1160 | 57950000 | -0.18216 | 0.004911132 |
| chr20 | 57950001 | 58050000 | 1094 | 1137 | 5.80E+07 | -0.12799 | 0.034654296 |
| chr20 | 58150001 | 58250000 | 1109 | 1195 | 58200000 | -0.18012 | 0.00533545  |
| chr20 | 58200001 | 58300000 | 1079 | 1163 | 58250000 | -0.18053 | 0.005248571 |
| chr20 | 58250001 | 58350000 | 1123 | 1166 | 58300000 | -0.12658 | 0.03621228  |
| chr20 | 58300001 | 58400000 | 1109 | 1149 | 58350000 | -0.12349 | 0.039829403 |

|       |          |          |      |      |          |          |             |
|-------|----------|----------|------|------|----------|----------|-------------|
| chr20 | 58600001 | 58700000 | 1056 | 1129 | 58650000 | -0.16881 | 0.008341942 |
| chr20 | 58650001 | 58750000 | 1053 | 1132 | 58700000 | -0.17674 | 0.006112672 |
| chr20 | 59550001 | 59650000 | 1064 | 1102 | 59600000 | -0.123   | 0.040433212 |
| chr20 | 59600001 | 59700000 | 1089 | 1129 | 59650000 | -0.12441 | 0.038720575 |
| chr20 | 59750001 | 59850000 | 1041 | 1112 | 59800000 | -0.16756 | 0.008751544 |
| chr20 | 59800001 | 59900000 | 1026 | 1203 | 59850000 | -0.30198 | 1.02E-05    |
| chr20 | 59850001 | 59950000 | 1072 | 1213 | 59900000 | -0.25065 | 0.000196735 |
| chr20 | 59900001 | 60000000 | 1067 | 1130 | 59950000 | -0.15513 | 0.01388799  |
| chr20 | 60100001 | 60200000 | 1065 | 1183 | 60150000 | -0.22397 | 0.000761085 |
| chr20 | 60150001 | 60250000 | 1106 | 1240 | 60200000 | -0.23736 | 0.000392084 |
| chr20 | 60200001 | 60300000 | 1129 | 1270 | 60250000 | -0.24215 | 0.000306817 |
| chr20 | 60250001 | 60350000 | 1118 | 1256 | 60300000 | -0.24029 | 0.000337721 |
| chr20 | 60300001 | 60400000 | 1062 | 1206 | 60350000 | -0.25582 | 0.000149147 |
| chr20 | 60350001 | 60450000 | 1068 | 1263 | 60400000 | -0.31431 | 4.68E-06    |
| chr20 | 60400001 | 60500000 | 1108 | 1296 | 60450000 | -0.29848 | 1.27E-05    |
| chr20 | 60450001 | 60550000 | 996  | 1134 | 60500000 | -0.25957 | 0.000121605 |
| chr20 | 60500001 | 60600000 | 945  | 1035 | 60550000 | -0.20362 | 0.001961334 |
| chr20 | 60550001 | 60650000 | 1020 | 1124 | 60600000 | -0.21244 | 0.001312697 |
| chr20 | 60600001 | 60700000 | 948  | 1099 | 60650000 | -0.2856  | 2.76E-05    |
| chr20 | 60650001 | 60750000 | 914  | 1108 | 60700000 | -0.35006 | 4.21E-07    |
| chr20 | 60700001 | 60800000 | 1027 | 1177 | 60750000 | -0.26905 | 7.19E-05    |
| chr20 | 60750001 | 60850000 | 1103 | 1240 | 60800000 | -0.24128 | 0.00032097  |
| chr20 | 60800001 | 60900000 | 1084 | 1213 | 60850000 | -0.23459 | 0.00045101  |
| chr20 | 60850001 | 60950000 | 1020 | 1210 | 60900000 | -0.31881 | 3.50E-06    |
| chr20 | 60900001 | 61000000 | 1032 | 1326 | 60950000 | -0.43401 | 6.33E-10    |
| chr20 | 60950001 | 61050000 | 1092 | 1324 | 6.10E+07 | -0.3503  | 4.14E-07    |
| chr20 | 61000001 | 61100000 | 1001 | 1226 | 61050000 | -0.36489 | 1.45E-07    |
| chr20 | 61050001 | 61150000 | 522  | 690  | 61100000 | -0.47492 | 1.77E-11    |
| chr20 | 61100001 | 61200000 | 663  | 812  | 61150000 | -0.36484 | 1.46E-07    |
| chr20 | 61150001 | 61250000 | 719  | 862  | 61200000 | -0.33407 | 1.27E-06    |
| chr20 | 61200001 | 61300000 | 548  | 652  | 61250000 | -0.32307 | 2.65E-06    |
| chr20 | 61250001 | 61350000 | 955  | 1149 | 61300000 | -0.33918 | 8.97E-07    |
| chr20 | 61300001 | 61400000 | 1104 | 1325 | 61350000 | -0.33562 | 1.14E-06    |
| chr20 | 61350001 | 61450000 | 1070 | 1359 | 61400000 | -0.41731 | 2.53E-09    |
| chr20 | 61400001 | 61500000 | 1015 | 1231 | 61450000 | -0.35072 | 4.02E-07    |
| chr20 | 61450001 | 61550000 | 1037 | 1111 | 61500000 | -0.17181 | 0.007424168 |
| chr20 | 61500001 | 61600000 | 1027 | 1169 | 61550000 | -0.25921 | 0.000124049 |
| chr20 | 61550001 | 61650000 | 1007 | 1239 | 61600000 | -0.37148 | 8.95E-08    |
| chr20 | 61600001 | 61700000 | 1026 | 1277 | 61650000 | -0.3881  | 2.56E-08    |
| chr20 | 61650001 | 61750000 | 1055 | 1216 | 61700000 | -0.27727 | 4.49E-05    |
| chr20 | 61700001 | 61800000 | 1079 | 1207 | 61750000 | -0.2341  | 0.000462098 |
| chr20 | 61750001 | 61850000 | 1076 | 1210 | 61800000 | -0.2417  | 0.000314081 |
| chr20 | 61800001 | 61900000 | 1084 | 1216 | 61850000 | -0.23815 | 0.000376668 |
| chr20 | 61850001 | 61950000 | 1091 | 1301 | 61900000 | -0.32634 | 2.13E-06    |
| chr20 | 61900001 | 62000000 | 1054 | 1362 | 61950000 | -0.44222 | 3.15E-10    |
| chr20 | 61950001 | 62050000 | 1046 | 1377 | 6.20E+07 | -0.46902 | 3.01E-11    |
| chr20 | 62000001 | 62100000 | 1048 | 1325 | 62050000 | -0.41073 | 4.31E-09    |

|       |          |          |      |      |          |          |             |
|-------|----------|----------|------|------|----------|----------|-------------|
| chr20 | 62050001 | 62150000 | 1001 | 1235 | 62100000 | -0.37544 | 6.67E-08    |
| chr20 | 62100001 | 62200000 | 1022 | 1307 | 62150000 | -0.42724 | 1.12E-09    |
| chr20 | 62150001 | 62250000 | 976  | 1134 | 62200000 | -0.28884 | 2.28E-05    |
| chr20 | 62250001 | 62350000 | 942  | 1066 | 62300000 | -0.25078 | 0.000195342 |
| chr20 | 62300001 | 62400000 | 972  | 1116 | 62350000 | -0.27168 | 6.19E-05    |
| chr20 | 62350001 | 62450000 | 898  | 939  | 62400000 | -0.13678 | 0.026138439 |
| chr20 | 62400001 | 62500000 | 921  | 965  | 62450000 | -0.1397  | 0.023731629 |
| chr20 | 62500001 | 62600000 | 946  | 980  | 62550000 | -0.12331 | 0.040046237 |
| chr20 | 62550001 | 62650000 | 925  | 1025 | 62600000 | -0.22047 | 0.000900288 |
| chr20 | 62600001 | 62700000 | 984  | 1100 | 62650000 | -0.23315 | 0.000484785 |
| chr20 | 62650001 | 62750000 | 1090 | 1304 | 62700000 | -0.33099 | 1.56E-06    |
| chr20 | 62700001 | 62800000 | 1024 | 1207 | 62750000 | -0.30958 | 6.33E-06    |
| chr20 | 62950001 | 63050000 | 17   | 20   | 6.30E+07 | -0.30684 | 7.53E-06    |
| chr22 | 16000001 | 16100000 | 23   | 33   | 16050000 | -0.5932  | 1.41E-16    |
| chr22 | 16050001 | 16150000 | 47   | 58   | 16100000 | -0.37576 | 6.51E-08    |
| chr22 | 16100001 | 16200000 | 31   | 36   | 16150000 | -0.2881  | 2.38E-05    |
| chr22 | 16150001 | 16250000 | 16   | 22   | 16200000 | -0.5318  | 8.01E-14    |
| chr22 | 16200001 | 16300000 | 18   | 25   | 16250000 | -0.5463  | 1.88E-14    |
| chr22 | 16250001 | 16350000 | 42   | 33   | 16300000 | 0.275552 | 5.35E-05    |
| chr22 | 16300001 | 16400000 | 55   | 38   | 16350000 | 0.46106  | 8.47E-11    |
| chr22 | 16350001 | 16450000 | 28   | 24   | 16400000 | 0.150021 | 0.016892961 |
| chr22 | 16600001 | 16700000 | 8    | 12   | 16650000 | -0.65733 | 1.11E-19    |
| chr22 | 16650001 | 16750000 | 3    | 7    | 16700000 | -1.29476 | 3.54E-58    |
| chr22 | 16750001 | 16850000 | 28   | 30   | 16800000 | -0.17191 | 0.007397339 |
| chr22 | 16800001 | 16900000 | 292  | 310  | 16850000 | -0.15867 | 0.012210888 |
| chr22 | 16950001 | 17050000 | 183  | 218  | 1.70E+07 | -0.32486 | 2.35E-06    |
| chr22 | 17000001 | 17100000 | 245  | 284  | 17050000 | -0.28548 | 2.78E-05    |
| chr22 | 17050001 | 17150000 | 185  | 208  | 17100000 | -0.24143 | 0.000318488 |
| chr22 | 17400001 | 17500000 | 854  | 911  | 17450000 | -0.16559 | 0.009434209 |
| chr22 | 17450001 | 17550000 | 653  | 705  | 17500000 | -0.18291 | 0.004762242 |
| chr22 | 18100001 | 18200000 | 782  | 685  | 18150000 | 0.118693 | 0.046359226 |
| chr22 | 18200001 | 18300000 | 906  | 977  | 18250000 | -0.18122 | 0.005103186 |
| chr22 | 18250001 | 18350000 | 964  | 1073 | 18300000 | -0.22692 | 0.000659492 |
| chr22 | 18400001 | 18500000 | 838  | 879  | 18450000 | -0.14128 | 0.022504407 |
| chr22 | 18450001 | 18550000 | 796  | 848  | 18500000 | -0.16367 | 0.010143059 |
| chr22 | 18600001 | 18700000 | 369  | 387  | 18650000 | -0.14108 | 0.02265636  |
| chr22 | 18650001 | 18750000 | 21   | 34   | 18700000 | -0.76752 | 1.71E-25    |
| chr22 | 18700001 | 18800000 | 13   | 25   | 18750000 | -1.01579 | 3.09E-40    |
| chr22 | 18800001 | 18900000 | 203  | 172  | 18850000 | 0.166699 | 0.009211011 |
| chr22 | 18900001 | 19000000 | 603  | 644  | 18950000 | -0.16727 | 0.008847127 |
| chr22 | 18950001 | 19050000 | 747  | 847  | 1.90E+07 | -0.25363 | 0.000167823 |
| chr22 | 19000001 | 19100000 | 858  | 908  | 19050000 | -0.15409 | 0.014421612 |
| chr22 | 19050001 | 19150000 | 943  | 976  | 19100000 | -0.122   | 0.041683339 |
| chr22 | 19100001 | 19200000 | 968  | 1074 | 19150000 | -0.22229 | 0.000825316 |
| chr22 | 19400001 | 19500000 | 994  | 1044 | 19450000 | -0.14318 | 0.021110938 |
| chr22 | 19550001 | 19650000 | 993  | 1028 | 19600000 | -0.12235 | 0.04124187  |
| chr22 | 19600001 | 19700000 | 997  | 1046 | 19650000 | -0.14159 | 0.022274894 |

|       |          |          |      |      |          |          |             |
|-------|----------|----------|------|------|----------|----------|-------------|
| chr22 | 19650001 | 19750000 | 1034 | 1255 | 19700000 | -0.35182 | 3.72E-07    |
| chr22 | 19700001 | 19800000 | 1073 | 1338 | 19750000 | -0.3908  | 2.08E-08    |
| chr22 | 19750001 | 19850000 | 1064 | 1128 | 19800000 | -0.15664 | 0.013150895 |
| chr22 | 19800001 | 19900000 | 1026 | 1143 | 19850000 | -0.22817 | 0.000620345 |
| chr22 | 19850001 | 19950000 | 959  | 1103 | 19900000 | -0.2742  | 5.36E-05    |
| chr22 | 19900001 | 20000000 | 991  | 1151 | 19950000 | -0.2883  | 2.35E-05    |
| chr22 | 19950001 | 20050000 | 968  | 1208 | 2.00E+07 | -0.39191 | 1.91E-08    |
| chr22 | 20000001 | 20100000 | 948  | 1065 | 20050000 | -0.24027 | 0.000338099 |
| chr22 | 20050001 | 20150000 | 1002 | 1161 | 20100000 | -0.28486 | 2.88E-05    |
| chr22 | 20100001 | 20200000 | 1056 | 1284 | 20150000 | -0.35441 | 3.09E-07    |
| chr22 | 20150001 | 20250000 | 1139 | 1358 | 20200000 | -0.32609 | 2.17E-06    |
| chr22 | 20200001 | 20300000 | 877  | 1052 | 20250000 | -0.33486 | 1.20E-06    |
| chr22 | 20250001 | 20350000 | 368  | 444  | 20300000 | -0.34323 | 6.79E-07    |
| chr22 | 20300001 | 20400000 | 90   | 107  | 20350000 | -0.32199 | 2.84E-06    |
| chr22 | 20350001 | 20450000 | 12   | 16   | 20400000 | -0.48741 | 5.63E-12    |
| chr22 | 20400001 | 20500000 | 11   | 14   | 20450000 | -0.4203  | 1.98E-09    |
| chr22 | 20450001 | 20550000 | 9    | 7    | 20500000 | 0.290198 | 2.29E-05    |
| chr22 | 20550001 | 20650000 | 2    | 1    | 20600000 | 0.927628 | 7.06E-34    |
| chr22 | 20600001 | 20700000 | 8    | 5    | 20650000 | 0.6057   | 7.32E-17    |
| chr22 | 20700001 | 20800000 | 689  | 726  | 20750000 | -0.14784 | 0.017985082 |
| chr22 | 20750001 | 20850000 | 939  | 1027 | 20800000 | -0.20161 | 0.002144478 |
| chr22 | 20800001 | 20900000 | 848  | 907  | 20850000 | -0.16941 | 0.008150407 |
| chr22 | 20850001 | 20950000 | 907  | 975  | 20900000 | -0.17667 | 0.006129485 |
| chr22 | 20900001 | 21000000 | 956  | 1015 | 20950000 | -0.15877 | 0.012167331 |
| chr22 | 21050001 | 21150000 | 653  | 682  | 21100000 | -0.13506 | 0.027651494 |
| chr22 | 21200001 | 21300000 | 801  | 832  | 21250000 | -0.12715 | 0.035573936 |
| chr22 | 21250001 | 21350000 | 936  | 994  | 21300000 | -0.15911 | 0.012016223 |
| chr22 | 21300001 | 21400000 | 997  | 1077 | 21350000 | -0.18372 | 0.004605931 |
| chr22 | 21350001 | 21450000 | 840  | 902  | 21400000 | -0.17511 | 0.006522005 |
| chr22 | 21500001 | 21600000 | 4    | 6    | 21550000 | -0.65733 | 1.11E-19    |
| chr22 | 21550001 | 21650000 | 11   | 18   | 21600000 | -0.78287 | 2.41E-26    |
| chr22 | 21600001 | 21700000 | 13   | 19   | 21650000 | -0.61986 | 7.70E-18    |
| chr22 | 21750001 | 21850000 | 142  | 160  | 21800000 | -0.24455 | 0.000270984 |
| chr22 | 21800001 | 21900000 | 116  | 134  | 21850000 | -0.28048 | 3.73E-05    |
| chr22 | 21850001 | 21950000 | 288  | 312  | 21900000 | -0.18785 | 0.003881164 |
| chr22 | 22250001 | 22350000 | 946  | 1018 | 22300000 | -0.1782  | 0.005766366 |
| chr22 | 22950001 | 23050000 | 641  | 679  | 2.30E+07 | -0.15546 | 0.013726191 |
| chr22 | 23350001 | 23450000 | 979  | 1111 | 23400000 | -0.25485 | 0.000157139 |
| chr22 | 23400001 | 23500000 | 1086 | 1198 | 23450000 | -0.21398 | 0.001222668 |
| chr22 | 23450001 | 23550000 | 1035 | 1083 | 23500000 | -0.13777 | 0.025297615 |
| chr22 | 23600001 | 23700000 | 659  | 709  | 23650000 | -0.17788 | 0.005840499 |
| chr22 | 23650001 | 23750000 | 583  | 630  | 23700000 | -0.18423 | 0.004511467 |
| chr22 | 23700001 | 23800000 | 711  | 743  | 23750000 | -0.13588 | 0.026918235 |
| chr22 | 23800001 | 23900000 | 736  | 772  | 23850000 | -0.14127 | 0.022517915 |
| chr22 | 23900001 | 24000000 | 714  | 769  | 23950000 | -0.17943 | 0.005486812 |
| chr22 | 23950001 | 24050000 | 724  | 804  | 2.40E+07 | -0.22358 | 0.000775588 |
| chr22 | 24000001 | 24100000 | 814  | 857  | 24050000 | -0.14664 | 0.018748798 |

|       |          |          |      |      |          |          |             |
|-------|----------|----------|------|------|----------|----------|-------------|
| chr22 | 24150001 | 24250000 | 900  | 936  | 24200000 | -0.12896 | 0.033620948 |
| chr22 | 24350001 | 24450000 | 606  | 664  | 24400000 | -0.20424 | 0.001907587 |
| chr22 | 24400001 | 24500000 | 962  | 1072 | 24450000 | -0.22857 | 0.000608233 |
| chr22 | 24450001 | 24550000 | 1122 | 1177 | 24500000 | -0.14141 | 0.022407148 |
| chr22 | 24550001 | 24650000 | 830  | 863  | 24600000 | -0.12862 | 0.033976381 |
| chr22 | 24600001 | 24700000 | 505  | 535  | 24650000 | -0.15563 | 0.013642957 |
| chr22 | 24750001 | 24850000 | 968  | 1046 | 24800000 | -0.18418 | 0.004521158 |
| chr22 | 24800001 | 24900000 | 1026 | 1081 | 24850000 | -0.14771 | 0.018066428 |
| chr22 | 25100001 | 25200000 | 814  | 842  | 25150000 | -0.12116 | 0.04274423  |
| chr22 | 25150001 | 25250000 | 867  | 938  | 25200000 | -0.18593 | 0.004204974 |
| chr22 | 25550001 | 25650000 | 874  | 926  | 25600000 | -0.15575 | 0.013582196 |
| chr22 | 25700001 | 25800000 | 737  | 783  | 25750000 | -0.15972 | 0.011749136 |
| chr22 | 25750001 | 25850000 | 803  | 848  | 25800000 | -0.15104 | 0.016076741 |
| chr22 | 26400001 | 26500000 | 1066 | 1107 | 26450000 | -0.12682 | 0.03594536  |
| chr22 | 26600001 | 26700000 | 1041 | 1127 | 26650000 | -0.18689 | 0.004040011 |
| chr22 | 26650001 | 26750000 | 962  | 1052 | 26700000 | -0.2014  | 0.002164837 |
| chr22 | 26750001 | 26850000 | 977  | 1034 | 26800000 | -0.15418 | 0.014374548 |
| chr22 | 27450001 | 27550000 | 1095 | 1155 | 27500000 | -0.14933 | 0.017069478 |
| chr22 | 27650001 | 27750000 | 1108 | 1199 | 27700000 | -0.18625 | 0.004149786 |
| chr22 | 27700001 | 27800000 | 1070 | 1181 | 27750000 | -0.21477 | 0.00117822  |
| chr22 | 27850001 | 27950000 | 1093 | 1168 | 27900000 | -0.16812 | 0.008565698 |
| chr22 | 27900001 | 28000000 | 1094 | 1161 | 27950000 | -0.15813 | 0.01245705  |
| chr22 | 27950001 | 28050000 | 1066 | 1110 | 2.80E+07 | -0.13072 | 0.031791147 |
| chr22 | 28000001 | 28100000 | 1068 | 1114 | 28050000 | -0.13321 | 0.029360002 |
| chr22 | 28100001 | 28200000 | 1069 | 1106 | 28150000 | -0.12146 | 0.042361612 |
| chr22 | 28150001 | 28250000 | 1012 | 1132 | 28200000 | -0.23404 | 0.000463633 |
| chr22 | 28200001 | 28300000 | 982  | 1023 | 28250000 | -0.13138 | 0.031130842 |
| chr22 | 28400001 | 28500000 | 984  | 858  | 28450000 | 0.125309 | 0.037985686 |
| chr22 | 28450001 | 28550000 | 993  | 837  | 28500000 | 0.174194 | 0.006904107 |
| chr22 | 28500001 | 28600000 | 922  | 798  | 28550000 | 0.136006 | 0.027094003 |
| chr22 | 28650001 | 28750000 | 948  | 797  | 28700000 | 0.177936 | 0.005956918 |
| chr22 | 28800001 | 28900000 | 1040 | 908  | 28850000 | 0.123448 | 0.040205646 |
| chr22 | 28950001 | 29050000 | 874  | 735  | 2.90E+07 | 0.177517 | 0.00605675  |
| chr22 | 29000001 | 29100000 | 664  | 573  | 29050000 | 0.140276 | 0.023545963 |
| chr22 | 29500001 | 29600000 | 891  | 947  | 29550000 | -0.16031 | 0.011495331 |
| chr22 | 29550001 | 29650000 | 901  | 1003 | 29600000 | -0.22709 | 0.000653793 |
| chr22 | 29600001 | 29700000 | 998  | 1044 | 29650000 | -0.13738 | 0.025627276 |
| chr22 | 29700001 | 29800000 | 852  | 919  | 29750000 | -0.18158 | 0.005028102 |
| chr22 | 29750001 | 29850000 | 656  | 688  | 29800000 | -0.14108 | 0.02265636  |
| chr22 | 30100001 | 30200000 | 1014 | 1069 | 30150000 | -0.14858 | 0.017528021 |
| chr22 | 30150001 | 30250000 | 956  | 991  | 30200000 | -0.12425 | 0.038919614 |
| chr22 | 30550001 | 30650000 | 1024 | 1081 | 30600000 | -0.15052 | 0.016370824 |
| chr22 | 30600001 | 30700000 | 993  | 1177 | 30650000 | -0.31762 | 3.78E-06    |
| chr22 | 30650001 | 30750000 | 999  | 1127 | 30700000 | -0.2463  | 0.000247344 |
| chr22 | 30700001 | 30800000 | 988  | 1051 | 30750000 | -0.16155 | 0.010978248 |
| chr22 | 30750001 | 30850000 | 944  | 1025 | 30800000 | -0.19114 | 0.003378645 |
| chr22 | 30800001 | 30900000 | 962  | 1012 | 30850000 | -0.14547 | 0.019517701 |

|       |          |          |      |      |          |          |             |
|-------|----------|----------|------|------|----------|----------|-------------|
| chr22 | 30900001 | 31000000 | 926  | 981  | 30950000 | -0.15561 | 0.013650141 |
| chr22 | 30950001 | 31050000 | 902  | 979  | 3.10E+07 | -0.19055 | 0.003463337 |
| chr22 | 31100001 | 31200000 | 855  | 884  | 31150000 | -0.12049 | 0.04361376  |
| chr22 | 31250001 | 31350000 | 1021 | 1064 | 31300000 | -0.13189 | 0.030633469 |
| chr22 | 31400001 | 31500000 | 807  | 843  | 31450000 | -0.13534 | 0.027404727 |
| chr22 | 31450001 | 31550000 | 908  | 1014 | 31500000 | -0.23167 | 0.000521891 |
| chr22 | 31500001 | 31600000 | 880  | 953  | 31550000 | -0.18734 | 0.003963953 |
| chr22 | 31650001 | 31750000 | 946  | 997  | 31700000 | -0.14813 | 0.017805824 |
| chr22 | 31700001 | 31800000 | 800  | 859  | 31750000 | -0.17503 | 0.006542695 |
| chr22 | 31800001 | 31900000 | 799  | 849  | 31850000 | -0.15994 | 0.011653556 |
| chr22 | 31850001 | 31950000 | 740  | 803  | 31900000 | -0.19025 | 0.003508599 |
| chr22 | 32000001 | 32100000 | 853  | 884  | 32050000 | -0.12387 | 0.039367916 |
| chr22 | 32100001 | 32200000 | 850  | 695  | 32150000 | 0.218078 | 0.001048673 |
| chr22 | 32150001 | 32250000 | 903  | 752  | 32200000 | 0.191622 | 0.003400577 |
| chr22 | 32650001 | 32750000 | 730  | 775  | 32700000 | -0.15867 | 0.012210888 |
| chr22 | 33200001 | 33300000 | 1084 | 1128 | 33250000 | -0.12977 | 0.03276336  |
| chr22 | 33300001 | 33400000 | 946  | 1004 | 33350000 | -0.15822 | 0.01241519  |
| chr22 | 33350001 | 33450000 | 941  | 1053 | 33400000 | -0.23461 | 0.000450466 |
| chr22 | 34400001 | 34500000 | 995  | 1053 | 34450000 | -0.15411 | 0.014410047 |
| chr22 | 34450001 | 34550000 | 947  | 992  | 34500000 | -0.13935 | 0.024011746 |
| chr22 | 35400001 | 35500000 | 987  | 1023 | 35450000 | -0.12406 | 0.039147293 |
| chr22 | 35500001 | 35600000 | 945  | 1006 | 35550000 | -0.16262 | 0.010550957 |
| chr22 | 35550001 | 35650000 | 842  | 944  | 35600000 | -0.23734 | 0.000392524 |
| chr22 | 35700001 | 35800000 | 961  | 993  | 35750000 | -0.11963 | 0.044757893 |
| chr22 | 35750001 | 35850000 | 961  | 1000 | 35800000 | -0.12976 | 0.032774395 |
| chr22 | 35800001 | 35900000 | 958  | 1105 | 35850000 | -0.27832 | 4.23E-05    |
| chr22 | 35850001 | 35950000 | 1012 | 1051 | 35900000 | -0.12693 | 0.035827415 |
| chr22 | 35950001 | 36050000 | 1043 | 1115 | 3.60E+07 | -0.16868 | 0.00838413  |
| chr22 | 36450001 | 36550000 | 824  | 868  | 36500000 | -0.14742 | 0.018246234 |
| chr22 | 36500001 | 36600000 | 898  | 957  | 36550000 | -0.16418 | 0.009951165 |
| chr22 | 36550001 | 36650000 | 875  | 909  | 36600000 | -0.12737 | 0.03533507  |
| chr22 | 36700001 | 36800000 | 919  | 966  | 36750000 | -0.14433 | 0.020296808 |
| chr22 | 36950001 | 37050000 | 1034 | 1130 | 3.70E+07 | -0.20046 | 0.002256639 |
| chr22 | 37350001 | 37450000 | 1011 | 1056 | 37400000 | -0.1352  | 0.027527445 |
| chr22 | 37400001 | 37500000 | 1039 | 1260 | 37450000 | -0.3506  | 4.05E-07    |
| chr22 | 37450001 | 37550000 | 1056 | 1297 | 37500000 | -0.36894 | 1.08E-07    |
| chr22 | 37500001 | 37600000 | 1111 | 1147 | 37550000 | -0.11838 | 0.046455585 |
| chr22 | 37600001 | 37700000 | 1062 | 1193 | 37650000 | -0.24018 | 0.00033956  |
| chr22 | 37650001 | 37750000 | 1083 | 1258 | 37700000 | -0.28847 | 2.33E-05    |
| chr22 | 37700001 | 37800000 | 1157 | 1296 | 37750000 | -0.23605 | 0.000418997 |
| chr22 | 37750001 | 37850000 | 1135 | 1242 | 37800000 | -0.20234 | 0.002075737 |
| chr22 | 37800001 | 37900000 | 1042 | 1177 | 37850000 | -0.24813 | 0.000224718 |
| chr22 | 37850001 | 37950000 | 953  | 1135 | 37900000 | -0.32452 | 2.41E-06    |
| chr22 | 37900001 | 38000000 | 869  | 966  | 37950000 | -0.22504 | 0.00072264  |
| chr22 | 37950001 | 38050000 | 898  | 939  | 3.80E+07 | -0.13678 | 0.026138439 |
| chr22 | 38000001 | 38100000 | 877  | 991  | 38050000 | -0.24868 | 0.000218308 |
| chr22 | 38050001 | 38150000 | 901  | 938  | 38100000 | -0.13043 | 0.032086833 |

|       |          |          |      |      |          |          |             |
|-------|----------|----------|------|------|----------|----------|-------------|
| chr22 | 38200001 | 38300000 | 850  | 882  | 38250000 | -0.12569 | 0.03722986  |
| chr22 | 38250001 | 38350000 | 797  | 865  | 38300000 | -0.19049 | 0.003472299 |
| chr22 | 38400001 | 38500000 | 981  | 1095 | 38450000 | -0.23098 | 0.000540014 |
| chr22 | 38450001 | 38550000 | 939  | 1050 | 38500000 | -0.23356 | 0.000474734 |
| chr22 | 38550001 | 38650000 | 966  | 1019 | 38600000 | -0.14943 | 0.017011546 |
| chr22 | 38600001 | 38700000 | 925  | 984  | 38650000 | -0.16158 | 0.010967948 |
| chr22 | 38650001 | 38750000 | 857  | 902  | 38700000 | -0.1462  | 0.019032058 |
| chr22 | 38700001 | 38800000 | 543  | 576  | 38750000 | -0.15749 | 0.012751179 |
| chr22 | 38950001 | 39050000 | 895  | 771  | 3.90E+07 | 0.142785 | 0.02165053  |
| chr22 | 39050001 | 39150000 | 930  | 994  | 39100000 | -0.16839 | 0.00847793  |
| chr22 | 39100001 | 39200000 | 1010 | 1139 | 39150000 | -0.24578 | 0.000254139 |
| chr22 | 39150001 | 39250000 | 1032 | 1070 | 39200000 | -0.12454 | 0.038570688 |
| chr22 | 39400001 | 39500000 | 607  | 630  | 39450000 | -0.12603 | 0.036840729 |
| chr22 | 39450001 | 39550000 | 758  | 817  | 39500000 | -0.18051 | 0.005252406 |
| chr22 | 39550001 | 39650000 | 987  | 1040 | 39600000 | -0.14783 | 0.017987601 |
| chr22 | 39600001 | 39700000 | 1025 | 1114 | 39650000 | -0.1925  | 0.003188494 |
| chr22 | 39800001 | 39900000 | 1013 | 1135 | 39850000 | -0.23643 | 0.000411003 |
| chr22 | 39850001 | 39950000 | 1043 | 1135 | 39900000 | -0.19432 | 0.002948177 |
| chr22 | 39900001 | 40000000 | 1047 | 1172 | 39950000 | -0.23508 | 0.000439896 |
| chr22 | 39950001 | 40050000 | 1096 | 1277 | 4.00E+07 | -0.29288 | 1.78E-05    |
| chr22 | 40000001 | 40100000 | 1150 | 1289 | 40050000 | -0.23699 | 0.000399513 |
| chr22 | 40050001 | 40150000 | 1148 | 1197 | 40100000 | -0.13267 | 0.029871827 |
| chr22 | 40900001 | 41000000 | 913  | 787  | 40950000 | 0.141879 | 0.022319261 |
| chr22 | 41050001 | 41150000 | 848  | 743  | 41100000 | 0.11833  | 0.046858031 |
| chr22 | 41650001 | 41750000 | 826  | 871  | 41700000 | -0.1489  | 0.017329032 |
| chr22 | 41700001 | 41800000 | 870  | 985  | 41750000 | -0.25148 | 0.000188206 |
| chr22 | 41750001 | 41850000 | 835  | 870  | 41800000 | -0.13161 | 0.030905059 |
| chr22 | 41850001 | 41950000 | 873  | 928  | 41900000 | -0.16051 | 0.011408816 |
| chr22 | 41900001 | 42000000 | 920  | 964  | 41950000 | -0.13977 | 0.023675084 |
| chr22 | 42100001 | 42200000 | 811  | 842  | 42150000 | -0.12649 | 0.03631541  |
| chr22 | 42150001 | 42250000 | 900  | 953  | 42200000 | -0.15492 | 0.013994233 |
| chr22 | 42200001 | 42300000 | 941  | 981  | 42250000 | -0.13243 | 0.030104955 |
| chr22 | 42250001 | 42350000 | 986  | 1049 | 42300000 | -0.16173 | 0.010906809 |
| chr22 | 42450001 | 42550000 | 778  | 802  | 42500000 | -0.1162  | 0.049530207 |
| chr22 | 42550001 | 42650000 | 1030 | 897  | 42600000 | 0.127093 | 0.035953416 |
| chr22 | 42650001 | 42750000 | 1141 | 1265 | 42700000 | -0.22121 | 0.00086902  |
| chr22 | 42700001 | 42800000 | 1037 | 1188 | 42750000 | -0.26849 | 7.42E-05    |
| chr22 | 42750001 | 42850000 | 949  | 1037 | 42800000 | -0.20031 | 0.00227169  |
| chr22 | 42800001 | 42900000 | 780  | 827  | 42850000 | -0.15678 | 0.013082102 |
| chr22 | 42850001 | 42950000 | 518  | 609  | 42900000 | -0.30586 | 8.01E-06    |
| chr22 | 42900001 | 43000000 | 495  | 571  | 42950000 | -0.27843 | 4.20E-05    |
| chr22 | 42950001 | 43050000 | 709  | 765  | 4.30E+07 | -0.18205 | 0.004934064 |
| chr22 | 43000001 | 43100000 | 856  | 907  | 43050000 | -0.15586 | 0.013526844 |
| chr22 | 43050001 | 43150000 | 826  | 869  | 43100000 | -0.14559 | 0.019441418 |
| chr22 | 43250001 | 43350000 | 971  | 1010 | 43300000 | -0.12918 | 0.033379709 |
| chr22 | 43450001 | 43550000 | 776  | 844  | 43500000 | -0.19356 | 0.003046926 |
| chr22 | 43500001 | 43600000 | 861  | 1036 | 43550000 | -0.33931 | 8.89E-07    |



|       |          |          |      |      |          |          |             |
|-------|----------|----------|------|------|----------|----------|-------------|
| chr22 | 43550001 | 43650000 | 1021 | 1198 | 43600000 | -0.30302 | 9.57E-06    |
| chr22 | 43600001 | 43700000 | 1130 | 1269 | 43650000 | -0.23974 | 0.000347312 |
| chr22 | 43650001 | 43750000 | 1074 | 1189 | 43700000 | -0.21913 | 0.000959744 |
| chr22 | 43750001 | 43850000 | 1050 | 1092 | 43800000 | -0.12896 | 0.033620948 |
| chr22 | 43800001 | 43900000 | 1086 | 1204 | 43850000 | -0.22118 | 0.000870155 |
| chr22 | 43850001 | 43950000 | 1085 | 1123 | 43900000 | -0.12203 | 0.041633495 |
| chr22 | 44150001 | 44250000 | 1042 | 1113 | 44200000 | -0.16747 | 0.008781196 |
| chr22 | 44200001 | 44300000 | 995  | 1167 | 44250000 | -0.30241 | 9.94E-06    |
| chr22 | 44250001 | 44350000 | 987  | 1079 | 44300000 | -0.20094 | 0.00220868  |
| chr22 | 44500001 | 44600000 | 1005 | 1088 | 44550000 | -0.18685 | 0.00404581  |
| chr22 | 44550001 | 44650000 | 916  | 1012 | 44600000 | -0.21616 | 0.001103912 |
| chr22 | 44600001 | 44700000 | 884  | 973  | 44650000 | -0.21077 | 0.001418419 |
| chr22 | 44650001 | 44750000 | 1096 | 1255 | 44700000 | -0.26781 | 7.70E-05    |
| chr22 | 44700001 | 44800000 | 1142 | 1293 | 44750000 | -0.25153 | 0.000187692 |
| chr22 | 44750001 | 44850000 | 1068 | 1147 | 44800000 | -0.17533 | 0.006466508 |
| chr22 | 44800001 | 44900000 | 984  | 1040 | 44850000 | -0.15223 | 0.015413114 |
| chr22 | 44850001 | 44950000 | 974  | 1011 | 44900000 | -0.12616 | 0.03668805  |
| chr22 | 44900001 | 45000000 | 980  | 1086 | 44950000 | -0.22054 | 0.000897209 |
| chr22 | 44950001 | 45050000 | 998  | 1125 | 4.50E+07 | -0.24519 | 0.000262209 |
| chr22 | 45000001 | 45100000 | 965  | 1064 | 45050000 | -0.21327 | 0.001263487 |
| chr22 | 45050001 | 45150000 | 942  | 1098 | 45100000 | -0.29345 | 1.72E-05    |
| chr22 | 45100001 | 45200000 | 933  | 1069 | 45150000 | -0.26868 | 7.34E-05    |
| chr22 | 45200001 | 45300000 | 983  | 1040 | 45250000 | -0.15369 | 0.014627001 |
| chr22 | 45250001 | 45350000 | 989  | 1151 | 45300000 | -0.29122 | 1.97E-05    |
| chr22 | 45300001 | 45400000 | 1075 | 1206 | 45350000 | -0.23827 | 0.000374475 |
| chr22 | 45350001 | 45450000 | 1035 | 1109 | 45400000 | -0.172   | 0.007370545 |
| chr22 | 45400001 | 45500000 | 939  | 1029 | 45450000 | -0.20442 | 0.001892219 |
| chr22 | 45450001 | 45550000 | 909  | 951  | 45500000 | -0.13754 | 0.025496611 |
| chr22 | 45550001 | 45650000 | 888  | 962  | 45600000 | -0.18785 | 0.003881164 |
| chr22 | 45600001 | 45700000 | 854  | 1006 | 45650000 | -0.30869 | 6.70E-06    |
| chr22 | 45650001 | 45750000 | 899  | 979  | 45700000 | -0.19536 | 0.002819522 |
| chr22 | 45800001 | 45900000 | 869  | 898  | 45850000 | -0.11973 | 0.044621703 |
| chr22 | 45850001 | 45950000 | 884  | 979  | 45900000 | -0.21963 | 0.000936868 |
| chr22 | 45900001 | 46000000 | 979  | 1048 | 45950000 | -0.17063 | 0.007774579 |
| chr22 | 46200001 | 46300000 | 1114 | 1149 | 46250000 | -0.117   | 0.048384225 |
| chr22 | 46250001 | 46350000 | 1074 | 1230 | 46300000 | -0.26804 | 7.61E-05    |
| chr22 | 46300001 | 46400000 | 1128 | 1322 | 46350000 | -0.30133 | 1.06E-05    |
| chr22 | 46350001 | 46450000 | 1067 | 1236 | 46400000 | -0.28449 | 2.95E-05    |
| chr22 | 46400001 | 46500000 | 1056 | 1203 | 46450000 | -0.2604  | 0.000116242 |
| chr22 | 46450001 | 46550000 | 1059 | 1219 | 46500000 | -0.27537 | 5.02E-05    |
| chr22 | 46500001 | 46600000 | 933  | 1064 | 46550000 | -0.26192 | 0.000106912 |
| chr22 | 46650001 | 46750000 | 1016 | 1051 | 46700000 | -0.12123 | 0.042653066 |
| chr22 | 46750001 | 46850000 | 1041 | 1119 | 46800000 | -0.17661 | 0.006144097 |
| chr22 | 46800001 | 46900000 | 932  | 1073 | 46850000 | -0.27562 | 4.94E-05    |
| chr22 | 46850001 | 46950000 | 932  | 1020 | 46900000 | -0.20254 | 0.002057862 |
| chr22 | 46950001 | 47050000 | 990  | 1041 | 4.70E+07 | -0.14484 | 0.019944818 |
| chr22 | 47000001 | 47100000 | 1024 | 1159 | 47050000 | -0.25104 | 0.000192699 |

|       |          |          |      |      |          |          |             |
|-------|----------|----------|------|------|----------|----------|-------------|
| chr22 | 47050001 | 47150000 | 1047 | 1160 | 47100000 | -0.22024 | 0.000910446 |
| chr22 | 47100001 | 47200000 | 1023 | 1151 | 47150000 | -0.24245 | 0.000302124 |
| chr22 | 47150001 | 47250000 | 1001 | 1071 | 47200000 | -0.16989 | 0.008001182 |
| chr22 | 47200001 | 47300000 | 1021 | 1055 | 47250000 | -0.11963 | 0.044754088 |
| chr22 | 47250001 | 47350000 | 1022 | 1131 | 47300000 | -0.21858 | 0.000985149 |
| chr22 | 47350001 | 47450000 | 1132 | 1170 | 47400000 | -0.12001 | 0.044255721 |
| chr22 | 47400001 | 47500000 | 1039 | 1191 | 47450000 | -0.26935 | 7.07E-05    |
| chr22 | 47450001 | 47550000 | 1028 | 1181 | 47500000 | -0.27254 | 5.90E-05    |
| chr22 | 47500001 | 47600000 | 1066 | 1313 | 47550000 | -0.37303 | 7.98E-08    |
| chr22 | 47550001 | 47650000 | 1057 | 1206 | 47600000 | -0.26263 | 0.000102833 |
| chr22 | 47600001 | 47700000 | 1033 | 1103 | 47650000 | -0.16696 | 0.008952545 |
| chr22 | 47650001 | 47750000 | 1028 | 1070 | 47700000 | -0.13014 | 0.032383623 |
| chr22 | 47700001 | 47800000 | 1080 | 1116 | 47750000 | -0.11968 | 0.044693179 |
| chr22 | 47750001 | 47850000 | 1049 | 1156 | 47800000 | -0.2125  | 0.00130943  |
| chr22 | 47950001 | 48050000 | 1042 | 1101 | 4.80E+07 | -0.15183 | 0.015630419 |
| chr22 | 48000001 | 48100000 | 1054 | 1145 | 48050000 | -0.19184 | 0.003278486 |
| chr22 | 48100001 | 48200000 | 1031 | 1072 | 48150000 | -0.12863 | 0.033964263 |
| chr22 | 48150001 | 48250000 | 999  | 1069 | 48200000 | -0.17008 | 0.007942945 |
| chr22 | 48400001 | 48500000 | 1016 | 1128 | 48450000 | -0.22324 | 0.000788378 |
| chr22 | 48450001 | 48550000 | 1036 | 1179 | 48500000 | -0.25891 | 0.000126091 |
| chr22 | 48500001 | 48600000 | 1046 | 1139 | 48550000 | -0.19526 | 0.00283208  |
| chr22 | 48550001 | 48650000 | 1089 | 1142 | 48600000 | -0.14093 | 0.022773893 |
| chr22 | 48600001 | 48700000 | 1082 | 1141 | 48650000 | -0.14897 | 0.017288252 |
| chr22 | 48650001 | 48750000 | 1097 | 1210 | 48700000 | -0.21382 | 0.001231821 |
| chr22 | 48700001 | 48800000 | 1120 | 1166 | 48750000 | -0.13044 | 0.032078441 |
| chr22 | 48850001 | 48950000 | 1089 | 1202 | 48900000 | -0.2148  | 0.001176308 |
| chr22 | 48900001 | 49000000 | 1151 | 1357 | 48950000 | -0.3099  | 6.21E-06    |
| chr22 | 48950001 | 49050000 | 1089 | 1352 | 4.90E+07 | -0.38446 | 3.38E-08    |
| chr22 | 49000001 | 49100000 | 1044 | 1251 | 49050000 | -0.33333 | 1.34E-06    |
| chr22 | 49050001 | 49150000 | 1069 | 1134 | 49100000 | -0.15753 | 0.012731571 |
| chr22 | 49150001 | 49250000 | 1080 | 1137 | 49200000 | -0.14657 | 0.018791278 |
| chr22 | 49200001 | 49300000 | 1045 | 1129 | 49250000 | -0.18391 | 0.004570106 |
| chr22 | 49350001 | 49450000 | 994  | 1050 | 49400000 | -0.15144 | 0.015846708 |
| chr22 | 49400001 | 49500000 | 1046 | 1168 | 49450000 | -0.23153 | 0.000525431 |
| chr22 | 49450001 | 49550000 | 1074 | 1153 | 49500000 | -0.17477 | 0.006610259 |
| chr22 | 49600001 | 49700000 | 1057 | 1116 | 49650000 | -0.15073 | 0.016249512 |
| chr22 | 49650001 | 49750000 | 1057 | 1094 | 49700000 | -0.12201 | 0.04166569  |
| chr22 | 49800001 | 49900000 | 1008 | 1102 | 49850000 | -0.201   | 0.002203246 |
| chr22 | 49850001 | 49950000 | 1072 | 1122 | 49900000 | -0.13814 | 0.024993998 |
| chr22 | 49900001 | 50000000 | 1100 | 1146 | 49950000 | -0.13148 | 0.031039266 |
| chr22 | 49950001 | 50050000 | 1110 | 1196 | 5.00E+07 | -0.18003 | 0.005355698 |
| chr22 | 50000001 | 50100000 | 1107 | 1224 | 50050000 | -0.21732 | 0.001045361 |
| chr22 | 50050001 | 50150000 | 1008 | 1146 | 50100000 | -0.25748 | 0.000136285 |
| chr22 | 50100001 | 50200000 | 1024 | 1148 | 50150000 | -0.23728 | 0.000393714 |
| chr22 | 50150001 | 50250000 | 984  | 1084 | 50200000 | -0.21201 | 0.001339571 |
| chr22 | 50200001 | 50300000 | 896  | 934  | 50250000 | -0.1323  | 0.030235218 |
| chr22 | 50250001 | 50350000 | 939  | 1061 | 50300000 | -0.2486  | 0.000219238 |

|       |          |          |      |      |          |          |             |
|-------|----------|----------|------|------|----------|----------|-------------|
| chr22 | 50300001 | 50400000 | 672  | 844  | 50350000 | -0.40115 | 9.25E-09    |
| chr22 | 50350001 | 50450000 | 504  | 593  | 50400000 | -0.30698 | 7.47E-06    |
| chr22 | 50400001 | 50500000 | 798  | 908  | 50450000 | -0.25868 | 0.000127725 |
| chr22 | 50450001 | 50550000 | 903  | 1005 | 50500000 | -0.22677 | 0.000664258 |
| chr22 | 50500001 | 50600000 | 871  | 945  | 50550000 | -0.19001 | 0.003543355 |
| chr22 | 50550001 | 50650000 | 978  | 1097 | 50600000 | -0.23803 | 0.000378998 |
| chr22 | 50600001 | 50700000 | 992  | 1166 | 50650000 | -0.30553 | 8.18E-06    |
| chr22 | 50650001 | 50750000 | 997  | 1239 | 50700000 | -0.38588 | 3.03E-08    |
| chr22 | 50700001 | 50800000 | 968  | 1173 | 50750000 | -0.3495  | 4.38E-07    |
| chr22 | 50750001 | 50850000 | 834  | 897  | 50800000 | -0.17743 | 0.00594593  |
| chr22 | 50800001 | 50900000 | 862  | 922  | 50850000 | -0.16945 | 0.008137645 |
| chr22 | 50850001 | 50950000 | 955  | 1079 | 50900000 | -0.24849 | 0.00022046  |
| chr22 | 50900001 | 51000000 | 968  | 1081 | 50950000 | -0.23166 | 0.000522043 |
| chr22 | 50950001 | 51050000 | 963  | 1147 | 5.10E+07 | -0.32463 | 2.39E-06    |
| chr22 | 51000001 | 51100000 | 866  | 1017 | 51050000 | -0.30425 | 8.86E-06    |
| chr22 | 51050001 | 51150000 | 858  | 889  | 51100000 | -0.12358 | 0.039724494 |
| chr22 | 51100001 | 51200000 | 831  | 874  | 51150000 | -0.14516 | 0.019730453 |
| chr22 | 51150001 | 51250000 | 366  | 403  | 51200000 | -0.21131 | 0.001383429 |
| chr22 | 51200001 | 51300000 | 17   | 23   | 51250000 | -0.50847 | 7.76E-13    |
| chr14 | 19150001 | 19250000 | 15   | 12   | 19200000 | 0.249556 | 0.000220671 |
| chr14 | 19200001 | 19300000 | 51   | 33   | 19250000 | 0.555659 | 1.25E-14    |
| chr14 | 19250001 | 19350000 | 62   | 44   | 19300000 | 0.422393 | 2.15E-09    |
| chr14 | 19300001 | 19400000 | 20   | 21   | 19350000 | -0.14276 | 0.02141004  |
| chr14 | 19350001 | 19450000 | 87   | 72   | 19400000 | 0.200647 | 0.00230796  |
| chr14 | 19450001 | 19550000 | 77   | 88   | 19500000 | -0.26502 | 9.01E-05    |
| chr14 | 19600001 | 19700000 | 51   | 39   | 19650000 | 0.314651 | 5.12E-06    |
| chr14 | 19650001 | 19750000 | 21   | 13   | 19700000 | 0.619506 | 1.68E-17    |
| chr14 | 19700001 | 19800000 | 191  | 141  | 19750000 | 0.365506 | 1.65E-07    |
| chr14 | 19750001 | 19850000 | 217  | 163  | 19800000 | 0.340451 | 9.44E-07    |
| chr14 | 19800001 | 19900000 | 50   | 53   | 19850000 | -0.15644 | 0.013249006 |
| chr14 | 19850001 | 19950000 | 16   | 26   | 19900000 | -0.77281 | 8.72E-26    |
| chr14 | 19900001 | 20000000 | 3    | 6    | 19950000 | -1.07237 | 8.26E-44    |
| chr14 | 20000001 | 20100000 | 28   | 21   | 20050000 | 0.342666 | 8.12E-07    |
| chr14 | 20050001 | 20150000 | 55   | 42   | 20100000 | 0.316671 | 4.50E-06    |
| chr14 | 20100001 | 20200000 | 125  | 135  | 20150000 | -0.1834  | 0.004667224 |
| chr14 | 20450001 | 20550000 | 953  | 807  | 20500000 | 0.167536 | 0.00892373  |
| chr14 | 20500001 | 20600000 | 862  | 718  | 20550000 | 0.191332 | 0.003442279 |
| chr14 | 21250001 | 21350000 | 769  | 799  | 21300000 | -0.12758 | 0.03509902  |
| chr14 | 21500001 | 21600000 | 1015 | 1064 | 21550000 | -0.14039 | 0.023190168 |
| chr14 | 21550001 | 21650000 | 872  | 958  | 21600000 | -0.20807 | 0.001604528 |
| chr14 | 21800001 | 21900000 | 860  | 895  | 21850000 | -0.12992 | 0.032609557 |
| chr14 | 23050001 | 23150000 | 861  | 749  | 23100000 | 0.128676 | 0.034225495 |
| chr14 | 23250001 | 23350000 | 903  | 951  | 23300000 | -0.14709 | 0.018457138 |
| chr14 | 23450001 | 23550000 | 931  | 994  | 23500000 | -0.16684 | 0.008996321 |
| chr14 | 23500001 | 23600000 | 1022 | 1070 | 23550000 | -0.13859 | 0.024625966 |
| chr14 | 23750001 | 23850000 | 1009 | 1095 | 23800000 | -0.19038 | 0.003489353 |
| chr14 | 23800001 | 23900000 | 1012 | 1117 | 23850000 | -0.21479 | 0.001177025 |

|       |          |          |      |      |          |          |             |
|-------|----------|----------|------|------|----------|----------|-------------|
| chr14 | 24400001 | 24500000 | 275  | 311  | 24450000 | -0.24985 | 0.000205168 |
| chr14 | 24550001 | 24650000 | 933  | 978  | 24600000 | -0.14033 | 0.023237599 |
| chr14 | 24650001 | 24750000 | 988  | 1068 | 24700000 | -0.1847  | 0.004424287 |
| chr14 | 24700001 | 24800000 | 1059 | 1189 | 24750000 | -0.23942 | 0.000353097 |
| chr14 | 24750001 | 24850000 | 1022 | 1149 | 24800000 | -0.24136 | 0.000319713 |
| chr14 | 24800001 | 24900000 | 1071 | 1149 | 24850000 | -0.17379 | 0.006870423 |
| chr14 | 25750001 | 25850000 | 875  | 767  | 25800000 | 0.117685 | 0.047756936 |
| chr14 | 26050001 | 26150000 | 967  | 842  | 26100000 | 0.127324 | 0.035696666 |
| chr14 | 26250001 | 26350000 | 1014 | 871  | 26300000 | 0.146941 | 0.018795257 |
| chr14 | 26300001 | 26400000 | 1033 | 897  | 26350000 | 0.131289 | 0.031523776 |
| chr14 | 26700001 | 26800000 | 935  | 816  | 26750000 | 0.124025 | 0.03950537  |
| chr14 | 26850001 | 26950000 | 1058 | 928  | 26900000 | 0.116771 | 0.049052477 |
| chr14 | 26900001 | 27000000 | 1075 | 841  | 26950000 | 0.281787 | 3.75E-05    |
| chr14 | 26950001 | 27050000 | 1020 | 871  | 2.70E+07 | 0.155453 | 0.013938628 |
| chr14 | 27000001 | 27100000 | 1030 | 902  | 27050000 | 0.119073 | 0.045840522 |
| chr14 | 27050001 | 27150000 | 903  | 785  | 27100000 | 0.129662 | 0.033184517 |
| chr14 | 27300001 | 27400000 | 1025 | 896  | 27350000 | 0.121682 | 0.042408661 |
| chr14 | 27650001 | 27750000 | 935  | 801  | 27700000 | 0.150792 | 0.016442987 |
| chr14 | 27700001 | 27800000 | 976  | 834  | 27750000 | 0.154462 | 0.014441506 |
| chr14 | 27850001 | 27950000 | 1065 | 870  | 27900000 | 0.219394 | 0.000985907 |
| chr14 | 27900001 | 28000000 | 1020 | 847  | 27950000 | 0.195764 | 0.002851477 |
| chr14 | 28100001 | 28200000 | 1022 | 878  | 28150000 | 0.146731 | 0.018931839 |
| chr14 | 28150001 | 28250000 | 834  | 673  | 28200000 | 0.237069 | 0.000418037 |
| chr14 | 28200001 | 28300000 | 399  | 323  | 28250000 | 0.232483 | 0.000525015 |
| chr14 | 28250001 | 28350000 | 490  | 409  | 28300000 | 0.188309 | 0.003906444 |
| chr14 | 28300001 | 28400000 | 842  | 674  | 28350000 | 0.2487   | 0.000230755 |
| chr14 | 28350001 | 28450000 | 969  | 814  | 28400000 | 0.179096 | 0.00568757  |
| chr14 | 28550001 | 28650000 | 994  | 809  | 28600000 | 0.224734 | 0.000765151 |
| chr14 | 28600001 | 28700000 | 886  | 762  | 28650000 | 0.145144 | 0.019987935 |
| chr14 | 29600001 | 29700000 | 1034 | 900  | 29650000 | 0.127868 | 0.03509893  |
| chr14 | 29650001 | 29750000 | 1000 | 875  | 29700000 | 0.120273 | 0.044234652 |
| chr14 | 29900001 | 30000000 | 963  | 844  | 29950000 | 0.117921 | 0.047426251 |
| chr14 | 30100001 | 30200000 | 1056 | 916  | 30150000 | 0.132819 | 0.030025595 |
| chr14 | 30900001 | 31000000 | 1038 | 890  | 30950000 | 0.149557 | 0.017168104 |
| chr14 | 30950001 | 31050000 | 1046 | 858  | 3.10E+07 | 0.213462 | 0.001299014 |
| chr14 | 31000001 | 31100000 | 1020 | 890  | 31050000 | 0.12432  | 0.039152111 |
| chr14 | 31350001 | 31450000 | 980  | 834  | 31400000 | 0.160363 | 0.011664074 |
| chr14 | 31400001 | 31500000 | 946  | 806  | 31450000 | 0.158689 | 0.012400344 |
| chr14 | 31950001 | 32050000 | 944  | 787  | 3.20E+07 | 0.190051 | 0.003632496 |
| chr14 | 32000001 | 32100000 | 985  | 791  | 32050000 | 0.244074 | 0.000293092 |
| chr14 | 32050001 | 32150000 | 825  | 706  | 32100000 | 0.152354 | 0.015563739 |
| chr14 | 32100001 | 32200000 | 823  | 687  | 32150000 | 0.188211 | 0.003922484 |
| chr14 | 32150001 | 32250000 | 903  | 762  | 32200000 | 0.172563 | 0.00735726  |
| chr14 | 32450001 | 32550000 | 1089 | 940  | 32500000 | 0.1399   | 0.023842418 |
| chr14 | 32850001 | 32950000 | 920  | 952  | 32900000 | -0.1217  | 0.042057897 |
| chr14 | 32900001 | 33000000 | 857  | 903  | 32950000 | -0.1478  | 0.018006854 |
| chr14 | 33000001 | 33100000 | 1034 | 882  | 33050000 | 0.157014 | 0.013177013 |

|       |          |          |      |      |          |          |             |
|-------|----------|----------|------|------|----------|----------|-------------|
| chr14 | 33050001 | 33150000 | 1030 | 889  | 33100000 | 0.140017 | 0.023749464 |
| chr14 | 33200001 | 33300000 | 976  | 845  | 33250000 | 0.135558 | 0.027491119 |
| chr14 | 33250001 | 33350000 | 877  | 755  | 33300000 | 0.143728 | 0.02097205  |
| chr14 | 34300001 | 34400000 | 1027 | 883  | 34350000 | 0.145579 | 0.019693425 |
| chr14 | 35150001 | 35250000 | 858  | 726  | 35200000 | 0.168636 | 0.008557728 |
| chr14 | 35200001 | 35300000 | 876  | 741  | 35250000 | 0.169086 | 0.008412173 |
| chr14 | 35300001 | 35400000 | 871  | 713  | 35350000 | 0.216399 | 0.001134083 |
| chr14 | 35350001 | 35450000 | 842  | 710  | 35400000 | 0.173629 | 0.007058164 |
| chr14 | 35450001 | 35550000 | 810  | 691  | 35500000 | 0.156864 | 0.013248319 |
| chr14 | 35500001 | 35600000 | 819  | 694  | 35550000 | 0.166556 | 0.009261064 |
| chr14 | 35700001 | 35800000 | 931  | 788  | 35750000 | 0.168214 | 0.008696662 |
| chr14 | 35950001 | 36050000 | 1000 | 860  | 3.60E+07 | 0.14522  | 0.019936409 |
| chr14 | 36000001 | 36100000 | 969  | 809  | 36050000 | 0.187985 | 0.00395938  |
| chr14 | 36050001 | 36150000 | 909  | 772  | 36100000 | 0.163308 | 0.01046091  |
| chr14 | 36100001 | 36200000 | 924  | 810  | 36150000 | 0.117599 | 0.047877006 |
| chr14 | 36250001 | 36350000 | 807  | 862  | 36300000 | -0.16749 | 0.008774184 |
| chr14 | 36500001 | 36600000 | 932  | 991  | 36550000 | -0.16093 | 0.011235971 |
| chr14 | 36600001 | 36700000 | 924  | 801  | 36650000 | 0.133719 | 0.02917205  |
| chr14 | 37050001 | 37150000 | 990  | 1061 | 37100000 | -0.1723  | 0.007285873 |
| chr14 | 37500001 | 37600000 | 1034 | 900  | 37550000 | 0.127868 | 0.03509893  |
| chr14 | 37700001 | 37800000 | 954  | 833  | 37750000 | 0.123301 | 0.040384839 |
| chr14 | 37750001 | 37850000 | 828  | 719  | 37800000 | 0.131267 | 0.03154513  |
| chr14 | 38500001 | 38600000 | 1020 | 894  | 38550000 | 0.117851 | 0.04752453  |
| chr14 | 38650001 | 38750000 | 908  | 959  | 38700000 | -0.15121 | 0.015977984 |
| chr14 | 38750001 | 38850000 | 1012 | 879  | 38800000 | 0.130902 | 0.031911547 |
| chr14 | 38800001 | 38900000 | 1044 | 868  | 38850000 | 0.193983 | 0.003076856 |
| chr14 | 39200001 | 39300000 | 1002 | 847  | 39250000 | 0.170077 | 0.00809867  |
| chr14 | 39250001 | 39350000 | 1051 | 912  | 39300000 | 0.132285 | 0.030541033 |
| chr14 | 39450001 | 39550000 | 927  | 810  | 39500000 | 0.122276 | 0.041656805 |
| chr14 | 39500001 | 39600000 | 924  | 771  | 39550000 | 0.18879  | 0.003829004 |
| chr14 | 39700001 | 39800000 | 858  | 750  | 39750000 | 0.121715 | 0.042365622 |
| chr14 | 39750001 | 39850000 | 865  | 731  | 39800000 | 0.170457 | 0.007981226 |
| chr14 | 39900001 | 40000000 | 912  | 778  | 39950000 | 0.156892 | 0.013235185 |
| chr14 | 40600001 | 40700000 | 931  | 811  | 40650000 | 0.126707 | 0.036384531 |
| chr14 | 40700001 | 40800000 | 950  | 819  | 40750000 | 0.141692 | 0.022459628 |
| chr14 | 40750001 | 40850000 | 864  | 719  | 40800000 | 0.192668 | 0.003253544 |
| chr14 | 40800001 | 40900000 | 879  | 766  | 40850000 | 0.126147 | 0.037019405 |
| chr14 | 40850001 | 40950000 | 1032 | 866  | 40900000 | 0.180632 | 0.005347748 |
| chr14 | 40900001 | 41000000 | 1070 | 873  | 40950000 | 0.221185 | 0.000906048 |
| chr14 | 40950001 | 41050000 | 1050 | 858  | 4.10E+07 | 0.218968 | 0.001005848 |
| chr14 | 41000001 | 41100000 | 1007 | 849  | 41050000 | 0.173855 | 0.006996163 |
| chr14 | 41050001 | 41150000 | 1013 | 855  | 41100000 | 0.172266 | 0.007442587 |
| chr14 | 41100001 | 41200000 | 1019 | 863  | 41150000 | 0.16735  | 0.008986912 |
| chr14 | 41250001 | 41350000 | 1008 | 862  | 41300000 | 0.153364 | 0.015016998 |
| chr14 | 41300001 | 41400000 | 982  | 844  | 41350000 | 0.146108 | 0.01934025  |
| chr14 | 41450001 | 41550000 | 1037 | 889  | 41500000 | 0.149789 | 0.0170302   |
| chr14 | 41500001 | 41600000 | 1028 | 900  | 41550000 | 0.119472 | 0.045302328 |

|       |          |          |      |     |          |          |             |
|-------|----------|----------|------|-----|----------|----------|-------------|
| chr14 | 41700001 | 41800000 | 941  | 809 | 41750000 | 0.145683 | 0.019623464 |
| chr14 | 41850001 | 41950000 | 1032 | 904 | 41900000 | 0.118677 | 0.046381595 |
| chr14 | 41900001 | 42000000 | 963  | 839 | 41950000 | 0.126493 | 0.036626173 |
| chr14 | 42250001 | 42350000 | 1087 | 872 | 42300000 | 0.24558  | 0.000271251 |
| chr14 | 42300001 | 42400000 | 989  | 847 | 42350000 | 0.151237 | 0.016188546 |
| chr14 | 42350001 | 42450000 | 957  | 823 | 42400000 | 0.145255 | 0.019912595 |
| chr14 | 42400001 | 42500000 | 1042 | 822 | 42450000 | 0.269773 | 7.41E-05    |
| chr14 | 42450001 | 42550000 | 1029 | 843 | 42500000 | 0.215267 | 0.001195231 |
| chr14 | 42500001 | 42600000 | 983  | 819 | 42550000 | 0.190956 | 0.003497176 |
| chr14 | 42550001 | 42650000 | 962  | 835 | 42600000 | 0.131889 | 0.030928683 |
| chr14 | 42650001 | 42750000 | 960  | 819 | 42700000 | 0.156799 | 0.013279557 |
| chr14 | 42700001 | 42800000 | 908  | 769 | 42750000 | 0.167337 | 0.008991305 |
| chr14 | 42850001 | 42950000 | 965  | 824 | 42900000 | 0.155513 | 0.013908628 |
| chr14 | 42900001 | 43000000 | 990  | 833 | 42950000 | 0.17674  | 0.006246142 |
| chr14 | 42950001 | 43050000 | 1016 | 873 | 4.30E+07 | 0.146475 | 0.019098621 |
| chr14 | 43000001 | 43100000 | 1056 | 849 | 43050000 | 0.242402 | 0.000319273 |
| chr14 | 43050001 | 43150000 | 1047 | 862 | 43100000 | 0.20813  | 0.001655689 |
| chr14 | 43200001 | 43300000 | 946  | 823 | 43250000 | 0.128576 | 0.034332329 |
| chr14 | 43250001 | 43350000 | 987  | 845 | 43300000 | 0.151727 | 0.015911839 |
| chr14 | 43300001 | 43400000 | 1034 | 853 | 43350000 | 0.205247 | 0.001883902 |
| chr14 | 43500001 | 43600000 | 926  | 795 | 43550000 | 0.147686 | 0.018319443 |
| chr14 | 43550001 | 43650000 | 1067 | 864 | 43600000 | 0.232085 | 0.000535397 |
| chr14 | 43600001 | 43700000 | 1103 | 894 | 43650000 | 0.230714 | 0.000572673 |
| chr14 | 43650001 | 43750000 | 931  | 743 | 43700000 | 0.253047 | 0.000183687 |
| chr14 | 43700001 | 43800000 | 896  | 764 | 43750000 | 0.157554 | 0.012921877 |
| chr14 | 43800001 | 43900000 | 875  | 754 | 43850000 | 0.142347 | 0.021972058 |
| chr14 | 43850001 | 43950000 | 956  | 778 | 43900000 | 0.224869 | 0.000760239 |
| chr14 | 43900001 | 44000000 | 944  | 769 | 43950000 | 0.223431 | 0.000814341 |
| chr14 | 43950001 | 44050000 | 939  | 796 | 4.40E+07 | 0.165985 | 0.009462807 |
| chr14 | 44000001 | 44100000 | 942  | 790 | 44050000 | 0.181503 | 0.005163358 |
| chr14 | 44100001 | 44200000 | 986  | 852 | 44150000 | 0.138362 | 0.025084531 |
| chr14 | 44150001 | 44250000 | 982  | 778 | 44200000 | 0.263581 | 0.000104265 |
| chr14 | 44250001 | 44350000 | 1032 | 905 | 44300000 | 0.117082 | 0.048609211 |
| chr14 | 44300001 | 44400000 | 1078 | 892 | 44350000 | 0.20087  | 0.002285544 |
| chr14 | 44350001 | 44450000 | 1035 | 860 | 44400000 | 0.19485  | 0.002965118 |
| chr14 | 44400001 | 44500000 | 951  | 829 | 44450000 | 0.125701 | 0.037530536 |
| chr14 | 44450001 | 44550000 | 930  | 811 | 44500000 | 0.125157 | 0.038162969 |
| chr14 | 44600001 | 44700000 | 956  | 827 | 44650000 | 0.136752 | 0.0264443   |
| chr14 | 44650001 | 44750000 | 979  | 846 | 44700000 | 0.138279 | 0.025153141 |
| chr14 | 44750001 | 44850000 | 997  | 799 | 44800000 | 0.247026 | 0.000251717 |
| chr14 | 44800001 | 44900000 | 1008 | 780 | 44850000 | 0.297578 | 1.47E-05    |
| chr14 | 45450001 | 45550000 | 959  | 825 | 45500000 | 0.144765 | 0.020247502 |
| chr14 | 45500001 | 45600000 | 941  | 771 | 45550000 | 0.215092 | 0.001204925 |
| chr14 | 45550001 | 45650000 | 945  | 806 | 45600000 | 0.157163 | 0.013106307 |
| chr14 | 46400001 | 46500000 | 923  | 808 | 46450000 | 0.119604 | 0.045125127 |
| chr14 | 46700001 | 46800000 | 973  | 839 | 46750000 | 0.141397 | 0.022682439 |
| chr14 | 46750001 | 46850000 | 1002 | 855 | 46800000 | 0.156514 | 0.013416654 |

|       |          |          |      |      |          |          |             |
|-------|----------|----------|------|------|----------|----------|-------------|
| chr14 | 46850001 | 46950000 | 950  | 815  | 46900000 | 0.148756 | 0.017653413 |
| chr14 | 46900001 | 47000000 | 885  | 676  | 46950000 | 0.316282 | 4.61E-06    |
| chr14 | 46950001 | 47050000 | 896  | 714  | 4.70E+07 | 0.255203 | 0.000163842 |
| chr14 | 47200001 | 47300000 | 1053 | 831  | 47250000 | 0.269213 | 7.64E-05    |
| chr14 | 47250001 | 47350000 | 999  | 826  | 47300000 | 0.201971 | 0.002177748 |
| chr14 | 47300001 | 47400000 | 988  | 841  | 47350000 | 0.160033 | 0.011805746 |
| chr14 | 47350001 | 47450000 | 1016 | 860  | 47400000 | 0.16812  | 0.008727737 |
| chr14 | 47650001 | 47750000 | 1043 | 896  | 47700000 | 0.146797 | 0.018888851 |
| chr14 | 47700001 | 47800000 | 1016 | 885  | 47750000 | 0.126779 | 0.036303864 |
| chr14 | 48000001 | 48100000 | 1045 | 916  | 48050000 | 0.117712 | 0.047719068 |
| chr14 | 48400001 | 48500000 | 961  | 820  | 48450000 | 0.156541 | 0.013403923 |
| chr14 | 48450001 | 48550000 | 1031 | 855  | 48500000 | 0.197676 | 0.002626101 |
| chr14 | 49150001 | 49250000 | 949  | 828  | 49200000 | 0.124406 | 0.039050215 |
| chr14 | 49250001 | 49350000 | 997  | 867  | 49300000 | 0.12919  | 0.033679429 |
| chr14 | 49850001 | 49950000 | 946  | 975  | 49900000 | -0.11593 | 0.049923147 |
| chr14 | 50650001 | 50750000 | 904  | 791  | 50700000 | 0.120273 | 0.044234652 |
| chr14 | 51500001 | 51600000 | 1079 | 913  | 51550000 | 0.168636 | 0.008557728 |
| chr14 | 51800001 | 51900000 | 1016 | 891  | 51850000 | 0.117031 | 0.048680702 |
| chr14 | 51850001 | 51950000 | 1040 | 873  | 51900000 | 0.180158 | 0.005450634 |
| chr14 | 51900001 | 52000000 | 1098 | 914  | 51950000 | 0.19224  | 0.003312924 |
| chr14 | 51950001 | 52050000 | 1088 | 922  | 5.20E+07 | 0.166468 | 0.009291865 |
| chr14 | 52200001 | 52300000 | 678  | 720  | 52250000 | -0.15908 | 0.012027579 |
| chr14 | 52900001 | 53000000 | 823  | 865  | 52950000 | -0.14418 | 0.020401501 |
| chr14 | 53150001 | 53250000 | 968  | 849  | 53200000 | 0.116871 | 0.048909905 |
| chr14 | 53200001 | 53300000 | 925  | 759  | 53250000 | 0.212982 | 0.001327958 |
| chr14 | 53250001 | 53350000 | 881  | 756  | 53300000 | 0.148384 | 0.017882346 |
| chr14 | 53450001 | 53550000 | 1060 | 911  | 53500000 | 0.14617  | 0.019299703 |
| chr14 | 54100001 | 54200000 | 1121 | 967  | 54150000 | 0.140827 | 0.023118548 |
| chr14 | 54150001 | 54250000 | 1087 | 935  | 54200000 | 0.144942 | 0.020125944 |
| chr14 | 54450001 | 54550000 | 984  | 761  | 54500000 | 0.29839  | 1.40E-05    |
| chr14 | 54500001 | 54600000 | 1054 | 871  | 54550000 | 0.202758 | 0.002103542 |
| chr14 | 54750001 | 54850000 | 984  | 1019 | 54800000 | -0.1228  | 0.040682874 |
| chr14 | 55150001 | 55250000 | 1025 | 1094 | 55200000 | -0.16636 | 0.009160909 |
| chr14 | 55200001 | 55300000 | 1038 | 1114 | 55250000 | -0.17431 | 0.006730359 |
| chr14 | 55450001 | 55550000 | 897  | 779  | 55500000 | 0.131113 | 0.031699736 |
| chr14 | 56450001 | 56550000 | 966  | 842  | 56500000 | 0.125831 | 0.037381128 |
| chr14 | 57000001 | 57100000 | 957  | 1031 | 57050000 | -0.17983 | 0.00540014  |
| chr14 | 57050001 | 57150000 | 880  | 911  | 57100000 | -0.12232 | 0.041275808 |
| chr14 | 57100001 | 57200000 | 844  | 889  | 57150000 | -0.14731 | 0.0183162   |
| chr14 | 57350001 | 57450000 | 1040 | 872  | 57400000 | 0.181812 | 0.005099257 |
| chr14 | 57550001 | 57650000 | 908  | 769  | 57600000 | 0.167337 | 0.008991305 |
| chr14 | 57600001 | 57700000 | 1040 | 877  | 57650000 | 0.173563 | 0.007076479 |
| chr14 | 57800001 | 57900000 | 872  | 746  | 57850000 | 0.152781 | 0.015330752 |
| chr14 | 58700001 | 58800000 | 940  | 808  | 58750000 | 0.145934 | 0.019456149 |
| chr14 | 59400001 | 59500000 | 1098 | 931  | 59450000 | 0.165653 | 0.009581768 |
| chr14 | 60100001 | 60200000 | 931  | 977  | 60150000 | -0.14195 | 0.022006159 |
| chr14 | 60200001 | 60300000 | 1057 | 921  | 60250000 | 0.126331 | 0.036810508 |

|       |          |          |      |      |          |          |             |
|-------|----------|----------|------|------|----------|----------|-------------|
| chr14 | 60300001 | 60400000 | 937  | 969  | 60350000 | -0.12082 | 0.043189013 |
| chr14 | 60400001 | 60500000 | 933  | 785  | 60450000 | 0.176813 | 0.006228276 |
| chr14 | 60450001 | 60550000 | 909  | 706  | 60500000 | 0.29224  | 2.03E-05    |
| chr14 | 60500001 | 60600000 | 952  | 744  | 60550000 | 0.283287 | 3.43E-05    |
| chr14 | 60550001 | 60650000 | 1070 | 914  | 60600000 | 0.154973 | 0.014180235 |
| chr14 | 60850001 | 60950000 | 776  | 620  | 60900000 | 0.251417 | 0.000200172 |
| chr14 | 60900001 | 61000000 | 935  | 795  | 60950000 | 0.16164  | 0.011128259 |
| chr14 | 60950001 | 61050000 | 1059 | 922  | 6.10E+07 | 0.127492 | 0.03551075  |
| chr14 | 61000001 | 61100000 | 1009 | 840  | 61050000 | 0.192093 | 0.003333571 |
| chr14 | 61200001 | 61300000 | 983  | 844  | 61250000 | 0.147577 | 0.01838842  |
| chr14 | 61250001 | 61350000 | 994  | 811  | 61300000 | 0.221172 | 0.000906618 |
| chr14 | 61300001 | 61400000 | 897  | 762  | 61350000 | 0.162945 | 0.010602878 |
| chr14 | 61350001 | 61450000 | 876  | 762  | 61400000 | 0.128768 | 0.034126844 |
| chr14 | 61600001 | 61700000 | 959  | 990  | 61650000 | -0.11827 | 0.046605774 |
| chr14 | 61650001 | 61750000 | 997  | 1071 | 61700000 | -0.17566 | 0.006380025 |
| chr14 | 61700001 | 61800000 | 983  | 1029 | 61750000 | -0.13835 | 0.024819292 |
| chr14 | 62250001 | 62350000 | 944  | 973  | 62300000 | -0.11602 | 0.049790588 |
| chr14 | 62550001 | 62650000 | 1002 | 848  | 62600000 | 0.168375 | 0.00864356  |
| chr14 | 62950001 | 63050000 | 928  | 791  | 6.30E+07 | 0.158075 | 0.012679994 |
| chr14 | 63000001 | 63100000 | 937  | 819  | 63050000 | 0.121814 | 0.042240271 |
| chr14 | 63250001 | 63350000 | 972  | 795  | 63300000 | 0.21763  | 0.001070881 |
| chr14 | 63400001 | 63500000 | 986  | 1062 | 63450000 | -0.1795  | 0.005472496 |
| chr14 | 63550001 | 63650000 | 914  | 801  | 63600000 | 0.11802  | 0.04728812  |
| chr14 | 63600001 | 63700000 | 1017 | 850  | 63650000 | 0.186413 | 0.004225531 |
| chr14 | 64300001 | 64400000 | 968  | 773  | 64350000 | 0.252167 | 0.000192422 |
| chr14 | 64350001 | 64450000 | 966  | 777  | 64400000 | 0.241737 | 0.000330272 |
| chr14 | 64750001 | 64850000 | 816  | 847  | 64800000 | -0.12616 | 0.036684072 |
| chr14 | 65150001 | 65250000 | 1114 | 1174 | 65200000 | -0.14805 | 0.01784938  |
| chr14 | 65200001 | 65300000 | 1074 | 1224 | 65250000 | -0.26098 | 0.000112583 |
| chr14 | 65300001 | 65400000 | 1060 | 882  | 65350000 | 0.192842 | 0.003229632 |
| chr14 | 66000001 | 66100000 | 1027 | 851  | 66050000 | 0.198833 | 0.002497722 |
| chr14 | 66050001 | 66150000 | 994  | 781  | 66100000 | 0.275552 | 5.35E-05    |
| chr14 | 66100001 | 66200000 | 947  | 826  | 66150000 | 0.124851 | 0.038522425 |
| chr14 | 66250001 | 66350000 | 978  | 1027 | 66300000 | -0.1429  | 0.021308299 |
| chr14 | 67150001 | 67250000 | 899  | 782  | 67200000 | 0.128781 | 0.034113365 |
| chr14 | 67200001 | 67300000 | 992  | 861  | 67250000 | 0.131955 | 0.030863649 |
| chr14 | 67300001 | 67400000 | 917  | 778  | 67350000 | 0.16478  | 0.009901256 |
| chr14 | 67350001 | 67450000 | 967  | 823  | 67400000 | 0.160252 | 0.011711648 |
| chr14 | 67400001 | 67500000 | 1004 | 831  | 67450000 | 0.200467 | 0.002326153 |
| chr14 | 67700001 | 67800000 | 946  | 806  | 67750000 | 0.158689 | 0.012400344 |
| chr14 | 67750001 | 67850000 | 929  | 811  | 67800000 | 0.123605 | 0.040013968 |
| chr14 | 67800001 | 67900000 | 906  | 959  | 67850000 | -0.15439 | 0.014264449 |
| chr14 | 68800001 | 68900000 | 953  | 1047 | 68850000 | -0.20809 | 0.001603375 |
| chr14 | 68850001 | 68950000 | 967  | 997  | 68900000 | -0.11645 | 0.049175085 |
| chr14 | 69000001 | 69100000 | 1061 | 1114 | 69050000 | -0.1427  | 0.021457073 |
| chr14 | 69050001 | 69150000 | 1093 | 1148 | 69100000 | -0.1432  | 0.021092813 |
| chr14 | 69300001 | 69400000 | 974  | 1034 | 69350000 | -0.15861 | 0.012236604 |



|       |          |          |      |      |          |          |             |
|-------|----------|----------|------|------|----------|----------|-------------|
| chr14 | 69350001 | 69450000 | 1042 | 1138 | 69400000 | -0.19952 | 0.002352167 |
| chr14 | 69400001 | 69500000 | 1017 | 1052 | 69450000 | -0.12119 | 0.042713854 |
| chr14 | 69950001 | 70050000 | 957  | 1010 | 7.00E+07 | -0.15014 | 0.016595131 |
| chr14 | 70400001 | 70500000 | 1103 | 1150 | 70450000 | -0.13257 | 0.029967401 |
| chr14 | 70450001 | 70550000 | 1135 | 1174 | 70500000 | -0.12111 | 0.042810393 |
| chr14 | 71200001 | 71300000 | 993  | 862  | 71250000 | 0.131734 | 0.031081279 |
| chr14 | 72250001 | 72350000 | 721  | 752  | 72300000 | -0.13311 | 0.029458712 |
| chr14 | 72300001 | 72400000 | 785  | 814  | 72350000 | -0.12471 | 0.038371667 |
| chr14 | 73050001 | 73150000 | 1070 | 1113 | 73100000 | -0.12921 | 0.033347411 |
| chr14 | 73100001 | 73200000 | 1117 | 1180 | 73150000 | -0.15153 | 0.015798442 |
| chr14 | 73350001 | 73450000 | 885  | 933  | 73400000 | -0.14857 | 0.017530821 |
| chr14 | 73650001 | 73750000 | 971  | 1003 | 73700000 | -0.11915 | 0.045401905 |
| chr14 | 73750001 | 73850000 | 961  | 838  | 73800000 | 0.125214 | 0.0380959   |
| chr14 | 73800001 | 73900000 | 870  | 750  | 73850000 | 0.141753 | 0.02241399  |
| chr14 | 73850001 | 73950000 | 839  | 716  | 73900000 | 0.156339 | 0.013501491 |
| chr14 | 74900001 | 75000000 | 1028 | 1073 | 74950000 | -0.13418 | 0.028452052 |
| chr14 | 74950001 | 75050000 | 1086 | 1128 | 7.50E+07 | -0.12711 | 0.035616453 |
| chr14 | 75000001 | 75100000 | 1074 | 1141 | 75050000 | -0.15968 | 0.011767734 |
| chr14 | 75250001 | 75350000 | 936  | 969  | 75300000 | -0.12236 | 0.041224987 |
| chr14 | 75300001 | 75400000 | 992  | 1058 | 75350000 | -0.1653  | 0.009537511 |
| chr14 | 77300001 | 77400000 | 912  | 952  | 77350000 | -0.1343  | 0.028343521 |
| chr14 | 77350001 | 77450000 | 892  | 962  | 77400000 | -0.18136 | 0.005073011 |
| chr14 | 77400001 | 77500000 | 921  | 968  | 77450000 | -0.14418 | 0.020402762 |
| chr14 | 77600001 | 77700000 | 986  | 1063 | 77650000 | -0.18085 | 0.005179594 |
| chr14 | 79000001 | 79100000 | 974  | 1004 | 79050000 | -0.11614 | 0.049626725 |
| chr14 | 79300001 | 79400000 | 918  | 1003 | 79350000 | -0.20013 | 0.002289825 |
| chr14 | 79350001 | 79450000 | 953  | 1005 | 79400000 | -0.14902 | 0.017258583 |
| chr14 | 79650001 | 79750000 | 989  | 1021 | 79700000 | -0.11831 | 0.046546777 |
| chr14 | 79750001 | 79850000 | 1039 | 880  | 79800000 | 0.167248 | 0.009021517 |
| chr14 | 80350001 | 80450000 | 935  | 1022 | 80400000 | -0.20073 | 0.002229862 |
| chr14 | 80400001 | 80500000 | 913  | 949  | 80450000 | -0.12816 | 0.034466183 |
| chr14 | 80800001 | 80900000 | 1043 | 910  | 80850000 | 0.124429 | 0.03902235  |
| chr14 | 81050001 | 81150000 | 948  | 809  | 81100000 | 0.156376 | 0.013483932 |
| chr14 | 81500001 | 81600000 | 964  | 837  | 81550000 | 0.131434 | 0.031379019 |
| chr14 | 81650001 | 81750000 | 910  | 960  | 81700000 | -0.14954 | 0.016946689 |
| chr14 | 82750001 | 82850000 | 996  | 834  | 82800000 | 0.183727 | 0.004717737 |
| chr14 | 82800001 | 82900000 | 1027 | 899  | 82850000 | 0.119671 | 0.045034317 |
| chr14 | 83100001 | 83200000 | 1028 | 868  | 83150000 | 0.171702 | 0.007607111 |
| chr14 | 83150001 | 83250000 | 966  | 846  | 83200000 | 0.118994 | 0.045948507 |
| chr14 | 83800001 | 83900000 | 1045 | 893  | 83850000 | 0.154399 | 0.014473956 |
| chr14 | 83850001 | 83950000 | 1078 | 912  | 83900000 | 0.16888  | 0.008478607 |
| chr14 | 83900001 | 84000000 | 1097 | 930  | 83950000 | 0.165889 | 0.009497035 |
| chr14 | 83950001 | 84050000 | 1008 | 835  | 8.40E+07 | 0.199276 | 0.002450165 |
| chr14 | 84250001 | 84350000 | 1051 | 907  | 84300000 | 0.140216 | 0.023592871 |
| chr14 | 84300001 | 84400000 | 1060 | 890  | 84350000 | 0.179815 | 0.005526159 |
| chr14 | 84650001 | 84750000 | 1021 | 826  | 84700000 | 0.233397 | 0.000501839 |
| chr14 | 84700001 | 84800000 | 1035 | 902  | 84750000 | 0.12606  | 0.037119157 |

|       |          |          |      |      |          |          |             |
|-------|----------|----------|------|------|----------|----------|-------------|
| chr14 | 84800001 | 84900000 | 1067 | 891  | 84850000 | 0.187691 | 0.004008    |
| chr14 | 84850001 | 84950000 | 1059 | 895  | 84900000 | 0.170371 | 0.008007582 |
| chr14 | 85300001 | 85400000 | 1042 | 900  | 85350000 | 0.138987 | 0.024573736 |
| chr14 | 85350001 | 85450000 | 1109 | 955  | 85400000 | 0.143315 | 0.021267164 |
| chr14 | 85400001 | 85500000 | 1050 | 893  | 85450000 | 0.161285 | 0.011274689 |
| chr14 | 85550001 | 85650000 | 1054 | 905  | 85600000 | 0.147513 | 0.018428577 |
| chr14 | 86250001 | 86350000 | 1006 | 877  | 86300000 | 0.12561  | 0.037636431 |
| chr14 | 86300001 | 86400000 | 914  | 789  | 86350000 | 0.139797 | 0.023923544 |
| chr14 | 86500001 | 86600000 | 821  | 710  | 86550000 | 0.137191 | 0.026066978 |
| chr14 | 86950001 | 87050000 | 1084 | 919  | 8.70E+07 | 0.165856 | 0.009508816 |
| chr14 | 87000001 | 87100000 | 933  | 814  | 87050000 | 0.124477 | 0.038965712 |
| chr14 | 87600001 | 87700000 | 1070 | 910  | 87650000 | 0.161301 | 0.011268413 |
| chr14 | 87900001 | 88000000 | 1063 | 897  | 87950000 | 0.17259  | 0.00734963  |
| chr14 | 87950001 | 88050000 | 1071 | 922  | 8.80E+07 | 0.143748 | 0.020958128 |
| chr14 | 88150001 | 88250000 | 1004 | 1047 | 88200000 | -0.13287 | 0.029678782 |
| chr14 | 88300001 | 88400000 | 986  | 1028 | 88350000 | -0.13255 | 0.029986998 |
| chr14 | 88350001 | 88450000 | 944  | 985  | 88400000 | -0.13371 | 0.028890763 |
| chr14 | 88750001 | 88850000 | 978  | 1013 | 88800000 | -0.1231  | 0.0403081   |
| chr14 | 88850001 | 88950000 | 867  | 739  | 88900000 | 0.158086 | 0.012675151 |
| chr14 | 88900001 | 89000000 | 878  | 761  | 88950000 | 0.133953 | 0.028953654 |
| chr14 | 88950001 | 89050000 | 960  | 842  | 8.90E+07 | 0.116842 | 0.048950421 |
| chr14 | 89050001 | 89150000 | 988  | 866  | 89100000 | 0.117772 | 0.047634193 |
| chr14 | 89100001 | 89200000 | 951  | 817  | 89150000 | 0.146737 | 0.018927345 |
| chr14 | 89350001 | 89450000 | 1004 | 1046 | 89400000 | -0.1315  | 0.031019392 |
| chr14 | 90000001 | 90100000 | 963  | 1006 | 90050000 | -0.13539 | 0.027352383 |
| chr14 | 90400001 | 90500000 | 1020 | 886  | 90450000 | 0.130819 | 0.03199609  |
| chr14 | 90600001 | 90700000 | 952  | 811  | 90650000 | 0.158888 | 0.012310613 |
| chr14 | 90650001 | 90750000 | 889  | 745  | 90700000 | 0.182571 | 0.004944752 |
| chr14 | 90950001 | 91050000 | 1037 | 1163 | 9.10E+07 | -0.23781 | 0.000383298 |
| chr14 | 91000001 | 91100000 | 1060 | 1114 | 91050000 | -0.14406 | 0.020487146 |
| chr14 | 91600001 | 91700000 | 887  | 915  | 91650000 | -0.11721 | 0.048088746 |
| chr14 | 91700001 | 91800000 | 1030 | 1070 | 91750000 | -0.12734 | 0.035369071 |
| chr14 | 91750001 | 91850000 | 1036 | 1149 | 91800000 | -0.22173 | 0.000847802 |
| chr14 | 91800001 | 91900000 | 940  | 1017 | 91850000 | -0.18596 | 0.004199548 |
| chr14 | 91950001 | 92050000 | 798  | 825  | 9.20E+07 | -0.12038 | 0.043766622 |
| chr14 | 92100001 | 92200000 | 934  | 803  | 92150000 | 0.145651 | 0.019645238 |
| chr14 | 92450001 | 92550000 | 827  | 720  | 92500000 | 0.127519 | 0.035481556 |
| chr14 | 92500001 | 92600000 | 825  | 714  | 92550000 | 0.136098 | 0.02701305  |
| chr14 | 92650001 | 92750000 | 882  | 938  | 92700000 | -0.16118 | 0.011130471 |
| chr14 | 92800001 | 92900000 | 1054 | 1120 | 92850000 | -0.16    | 0.011629993 |
| chr14 | 92850001 | 92950000 | 1057 | 1123 | 92900000 | -0.15975 | 0.011734038 |
| chr14 | 92950001 | 93050000 | 1057 | 1093 | 9.30E+07 | -0.12069 | 0.04335763  |
| chr14 | 93100001 | 93200000 | 998  | 1056 | 93150000 | -0.15387 | 0.014534054 |
| chr14 | 93300001 | 93400000 | 918  | 954  | 93350000 | -0.12787 | 0.034789532 |
| chr14 | 93350001 | 93450000 | 1044 | 1168 | 93400000 | -0.23429 | 0.000457767 |
| chr14 | 93400001 | 93500000 | 1086 | 1254 | 93450000 | -0.27989 | 3.86E-05    |
| chr14 | 93450001 | 93550000 | 1140 | 1232 | 93500000 | -0.18434 | 0.004490585 |

|       |          |          |      |      |           |          |             |
|-------|----------|----------|------|------|-----------|----------|-------------|
| chr14 | 94150001 | 94250000 | 1104 | 1160 | 94200000  | -0.14376 | 0.020698013 |
| chr14 | 94200001 | 94300000 | 1101 | 1170 | 94250000  | -0.16007 | 0.011599878 |
| chr14 | 94250001 | 94350000 | 1028 | 1095 | 94300000  | -0.16346 | 0.010221551 |
| chr14 | 94300001 | 94400000 | 1037 | 1124 | 94350000  | -0.1886  | 0.003761135 |
| chr14 | 94350001 | 94450000 | 1044 | 1192 | 94400000  | -0.26363 | 9.73E-05    |
| chr14 | 94400001 | 94500000 | 1041 | 1161 | 94450000  | -0.22977 | 0.00057327  |
| chr14 | 94450001 | 94550000 | 1032 | 1090 | 94500000  | -0.15126 | 0.015951634 |
| chr14 | 94600001 | 94700000 | 990  | 849  | 94650000  | 0.149292 | 0.01732737  |
| chr14 | 94650001 | 94750000 | 967  | 845  | 94700000  | 0.122193 | 0.041761031 |
| chr14 | 95000001 | 95100000 | 1015 | 1064 | 95050000  | -0.14039 | 0.023190168 |
| chr14 | 95100001 | 95200000 | 946  | 975  | 95150000  | -0.11593 | 0.049923147 |
| chr14 | 95150001 | 95250000 | 923  | 964  | 95200000  | -0.13507 | 0.02763912  |
| chr14 | 95300001 | 95400000 | 1049 | 1104 | 95350000  | -0.1461  | 0.019102248 |
| chr14 | 95450001 | 95550000 | 1001 | 1074 | 95500000  | -0.17392 | 0.006834876 |
| chr14 | 95650001 | 95750000 | 1060 | 1097 | 95700000  | -0.12187 | 0.041840242 |
| chr14 | 95700001 | 95800000 | 1048 | 1139 | 95750000  | -0.1925  | 0.003187989 |
| chr14 | 95750001 | 95850000 | 1018 | 1101 | 95800000  | -0.18545 | 0.004289391 |
| chr14 | 95800001 | 95900000 | 978  | 1103 | 95850000  | -0.2459  | 0.000252631 |
| chr14 | 95850001 | 95950000 | 1039 | 1119 | 95900000  | -0.17939 | 0.005496821 |
| chr14 | 95900001 | 96000000 | 1068 | 1109 | 95950000  | -0.12672 | 0.036057424 |
| chr14 | 95950001 | 96050000 | 1010 | 1087 | 9.60E+07  | -0.17837 | 0.005726847 |
| chr14 | 96000001 | 96100000 | 1008 | 1062 | 96050000  | -0.14766 | 0.018096384 |
| chr14 | 96050001 | 96150000 | 963  | 1053 | 96100000  | -0.20127 | 0.002177161 |
| chr14 | 96100001 | 96200000 | 959  | 992  | 96150000  | -0.12118 | 0.042721219 |
| chr14 | 96300001 | 96400000 | 1086 | 1128 | 96350000  | -0.12711 | 0.035616453 |
| chr14 | 96350001 | 96450000 | 1023 | 1106 | 96400000  | -0.18492 | 0.004384861 |
| chr14 | 96400001 | 96500000 | 957  | 1004 | 96450000  | -0.14154 | 0.022311692 |
| chr14 | 96650001 | 96750000 | 1046 | 1098 | 96700000  | -0.14237 | 0.021697674 |
| chr14 | 96950001 | 97050000 | 926  | 956  | 9.70E+07  | -0.11837 | 0.046466815 |
| chr14 | 97150001 | 97250000 | 1015 | 1054 | 97200000  | -0.12677 | 0.036004281 |
| chr14 | 97350001 | 97450000 | 1030 | 1095 | 97400000  | -0.16066 | 0.011348396 |
| chr14 | 97500001 | 97600000 | 1062 | 1126 | 97550000  | -0.15679 | 0.013077414 |
| chr14 | 97550001 | 97650000 | 1017 | 1093 | 97600000  | -0.17635 | 0.006209639 |
| chr14 | 98250001 | 98350000 | 998  | 1041 | 98300000  | -0.13323 | 0.029340363 |
| chr14 | 98350001 | 98450000 | 1081 | 1118 | 98400000  | -0.12093 | 0.043051427 |
| chr14 | 99150001 | 99250000 | 1075 | 1113 | 99200000  | -0.12249 | 0.041064124 |
| chr14 | 99400001 | 99500000 | 982  | 1014 | 99450000  | -0.11863 | 0.04610374  |
| chr14 | 99650001 | 99750000 | 1070 | 1148 | 99700000  | -0.17388 | 0.006845702 |
| chr14 | 99700001 | 99800000 | 1022 | 1101 | 99750000  | -0.17979 | 0.005407622 |
| chr14 | 99800001 | 99900000 | 1049 | 1084 | 99850000  | -0.11972 | 0.044633961 |
| chr14 | 99850001 | 99950000 | 1035 | 1083 | 99900000  | -0.13777 | 0.025297615 |
| chr14 | 99900001 | 1E+08    | 1070 | 1107 | 99950000  | -0.12142 | 0.04241933  |
| chr14 | 99950001 | 1E+08    | 1095 | 1239 | 1.00E+08  | -0.25062 | 0.000197041 |
| chr14 | 1E+08    | 1E+08    | 1092 | 1294 | 100050000 | -0.31724 | 3.88E-06    |
| chr14 | 1E+08    | 1E+08    | 1073 | 1201 | 100100000 | -0.23496 | 0.000442672 |
| chr14 | 1E+08    | 1E+08    | 999  | 1151 | 100150000 | -0.2767  | 4.64E-05    |
| chr14 | 1E+08    | 1E+08    | 1012 | 1198 | 100200000 | -0.31579 | 4.26E-06    |

|       |          |          |      |      |           |          |             |
|-------|----------|----------|------|------|-----------|----------|-------------|
| chr14 | 1E+08    | 1.01E+08 | 1031 | 890  | 100500000 | 0.139795 | 0.023924951 |
| chr14 | 1.01E+08 | 1.01E+08 | 1031 | 1070 | 100600000 | -0.12594 | 0.036942243 |
| chr14 | 1.01E+08 | 1.01E+08 | 911  | 1002 | 100650000 | -0.20973 | 0.001487322 |
| chr14 | 1.01E+08 | 1.01E+08 | 988  | 1022 | 100750000 | -0.12118 | 0.042717428 |
| chr14 | 1.01E+08 | 1.01E+08 | 955  | 1009 | 100800000 | -0.15173 | 0.01568912  |
| chr14 | 1.01E+08 | 1.01E+08 | 945  | 1026 | 100850000 | -0.19102 | 0.003395995 |
| chr14 | 1.01E+08 | 1.01E+08 | 1022 | 1120 | 100900000 | -0.20448 | 0.001887336 |
| chr14 | 1.01E+08 | 1.01E+08 | 1060 | 1142 | 100950000 | -0.17987 | 0.005390344 |
| chr14 | 1.01E+08 | 1.01E+08 | 1112 | 1312 | 1.01E+08  | -0.31098 | 5.79E-06    |
| chr14 | 1.01E+08 | 1.01E+08 | 1151 | 1344 | 101050000 | -0.29602 | 1.47E-05    |
| chr14 | 1.01E+08 | 1.01E+08 | 1130 | 1216 | 101100000 | -0.17819 | 0.005767528 |
| chr14 | 1.01E+08 | 1.01E+08 | 1123 | 1176 | 101150000 | -0.1389  | 0.024370213 |
| chr14 | 1.01E+08 | 1.01E+08 | 1083 | 1134 | 101300000 | -0.13876 | 0.024485996 |
| chr14 | 1.01E+08 | 1.01E+08 | 1042 | 1115 | 101350000 | -0.17006 | 0.007948125 |
| chr14 | 1.01E+08 | 1.02E+08 | 1125 | 1190 | 101500000 | -0.15341 | 0.014776246 |
| chr14 | 1.02E+08 | 1.02E+08 | 1078 | 1274 | 101550000 | -0.31338 | 4.97E-06    |
| chr14 | 1.02E+08 | 1.02E+08 | 1052 | 1145 | 101600000 | -0.19458 | 0.002915387 |
| chr14 | 1.02E+08 | 1.02E+08 | 948  | 1002 | 101700000 | -0.1523  | 0.015374661 |
| chr14 | 1.02E+08 | 1.02E+08 | 847  | 900  | 101750000 | -0.15993 | 0.011656146 |
| chr14 | 1.02E+08 | 1.02E+08 | 902  | 1011 | 101800000 | -0.23696 | 0.000400217 |
| chr14 | 1.02E+08 | 1.02E+08 | 996  | 1055 | 101850000 | -0.1554  | 0.0137569   |
| chr14 | 1.02E+08 | 1.02E+08 | 1131 | 1274 | 1.02E+08  | -0.24414 | 0.000276886 |
| chr14 | 1.02E+08 | 1.02E+08 | 1107 | 1215 | 102050000 | -0.20667 | 0.001709463 |
| chr14 | 1.03E+08 | 1.03E+08 | 823  | 858  | 102550000 | -0.13246 | 0.03007907  |
| chr14 | 1.03E+08 | 1.03E+08 | 884  | 971  | 102950000 | -0.2078  | 0.001624538 |
| chr14 | 1.03E+08 | 1.03E+08 | 867  | 928  | 1.03E+08  | -0.17046 | 0.007824553 |
| chr14 | 1.03E+08 | 1.03E+08 | 842  | 881  | 103050000 | -0.13769 | 0.025365096 |
| chr14 | 1.03E+08 | 1.03E+08 | 846  | 900  | 103100000 | -0.16164 | 0.010942513 |
| chr14 | 1.03E+08 | 1.03E+08 | 980  | 1054 | 103350000 | -0.17739 | 0.005955311 |
| chr14 | 1.03E+08 | 1.03E+08 | 996  | 1112 | 103400000 | -0.23131 | 0.000531157 |
| chr14 | 1.03E+08 | 1.04E+08 | 980  | 1014 | 103450000 | -0.12158 | 0.04221543  |
| chr14 | 1.03E+08 | 1.04E+08 | 948  | 1040 | 103500000 | -0.206   | 0.00176252  |
| chr14 | 1.04E+08 | 1.04E+08 | 983  | 1162 | 103550000 | -0.31372 | 4.86E-06    |
| chr14 | 1.04E+08 | 1.04E+08 | 1016 | 1131 | 103600000 | -0.22707 | 0.000654563 |
| chr14 | 1.04E+08 | 1.04E+08 | 961  | 1022 | 103650000 | -0.16116 | 0.011139737 |
| chr14 | 1.04E+08 | 1.04E+08 | 874  | 943  | 103700000 | -0.182   | 0.004944075 |
| chr14 | 1.04E+08 | 1.04E+08 | 911  | 947  | 103950000 | -0.12829 | 0.034336571 |
| chr14 | 1.04E+08 | 1.04E+08 | 947  | 1080 | 1.04E+08  | -0.26197 | 0.000106643 |
| chr14 | 1.04E+08 | 1.04E+08 | 843  | 887  | 104050000 | -0.14577 | 0.019316681 |
| chr14 | 1.04E+08 | 1.04E+08 | 721  | 766  | 104100000 | -0.15972 | 0.011750244 |
| chr14 | 1.04E+08 | 1.04E+08 | 856  | 982  | 104150000 | -0.27048 | 6.63E-05    |
| chr14 | 1.04E+08 | 1.04E+08 | 984  | 1039 | 104200000 | -0.15084 | 0.016190083 |
| chr14 | 1.04E+08 | 1.04E+08 | 864  | 894  | 104400000 | -0.12162 | 0.042165053 |
| chr14 | 1.05E+08 | 1.05E+08 | 1054 | 1120 | 104550000 | -0.16    | 0.011629993 |
| chr14 | 1.05E+08 | 1.05E+08 | 1098 | 1386 | 104600000 | -0.40842 | 5.19E-09    |
| chr14 | 1.05E+08 | 1.05E+08 | 1146 | 1461 | 104650000 | -0.42272 | 1.62E-09    |
| chr14 | 1.05E+08 | 1.05E+08 | 1103 | 1257 | 104700000 | -0.26092 | 0.000112941 |

|       |          |          |      |      |           |          |             |
|-------|----------|----------|------|------|-----------|----------|-------------|
| chr14 | 1.05E+08 | 1.05E+08 | 1019 | 1146 | 104750000 | -0.24182 | 0.000312081 |
| chr14 | 1.05E+08 | 1.05E+08 | 1055 | 1245 | 104800000 | -0.31127 | 5.69E-06    |
| chr14 | 1.05E+08 | 1.05E+08 | 1043 | 1171 | 104850000 | -0.23937 | 0.000353895 |
| chr14 | 1.05E+08 | 1.05E+08 | 973  | 1121 | 104900000 | -0.27665 | 4.66E-05    |
| chr14 | 1.05E+08 | 1.05E+08 | 988  | 1126 | 104950000 | -0.261   | 0.000112495 |
| chr14 | 1.05E+08 | 1.05E+08 | 1069 | 1142 | 1.05E+08  | -0.16767 | 0.008713411 |
| chr14 | 1.05E+08 | 1.05E+08 | 1147 | 1270 | 105050000 | -0.21933 | 0.000950295 |
| chr14 | 1.05E+08 | 1.05E+08 | 1071 | 1188 | 105100000 | -0.22195 | 0.000838843 |
| chr14 | 1.05E+08 | 1.05E+08 | 1016 | 1262 | 105150000 | -0.38518 | 3.20E-08    |
| chr14 | 1.05E+08 | 1.05E+08 | 1079 | 1400 | 105200000 | -0.4481  | 1.90E-10    |
| chr14 | 1.05E+08 | 1.05E+08 | 1043 | 1249 | 105250000 | -0.33241 | 1.42E-06    |
| chr14 | 1.05E+08 | 1.05E+08 | 942  | 1152 | 105300000 | -0.36271 | 1.70E-07    |
| chr14 | 1.05E+08 | 1.05E+08 | 951  | 1137 | 105350000 | -0.33009 | 1.66E-06    |
| chr14 | 1.05E+08 | 1.05E+08 | 982  | 1110 | 105400000 | -0.24914 | 0.000213111 |
| chr14 | 1.05E+08 | 1.06E+08 | 926  | 1103 | 105450000 | -0.32472 | 2.38E-06    |
| chr14 | 1.05E+08 | 1.06E+08 | 906  | 1066 | 105500000 | -0.307   | 7.46E-06    |
| chr14 | 1.06E+08 | 1.06E+08 | 979  | 1017 | 105550000 | -0.12731 | 0.035399483 |
| chr14 | 1.06E+08 | 1.06E+08 | 1132 | 1209 | 105600000 | -0.16731 | 0.008834421 |
| chr14 | 1.06E+08 | 1.06E+08 | 1078 | 1299 | 105650000 | -0.34142 | 7.69E-07    |
| chr14 | 1.06E+08 | 1.06E+08 | 852  | 1015 | 105700000 | -0.32493 | 2.34E-06    |
| chr14 | 1.06E+08 | 1.06E+08 | 981  | 1072 | 105800000 | -0.20035 | 0.002267289 |
| chr14 | 1.06E+08 | 1.06E+08 | 1003 | 1161 | 105850000 | -0.28342 | 3.14E-05    |
| chr14 | 1.06E+08 | 1.06E+08 | 1034 | 1237 | 105900000 | -0.33098 | 1.56E-06    |
| chr14 | 1.06E+08 | 1.06E+08 | 1028 | 1236 | 105950000 | -0.33821 | 9.59E-07    |
| chr14 | 1.06E+08 | 1.06E+08 | 830  | 955  | 1.06E+08  | -0.27476 | 5.19E-05    |
| chr14 | 1.06E+08 | 1.06E+08 | 503  | 612  | 106050000 | -0.35535 | 2.89E-07    |
| chr14 | 1.06E+08 | 1.06E+08 | 327  | 424  | 106100000 | -0.44715 | 2.06E-10    |
| chr14 | 1.06E+08 | 1.06E+08 | 291  | 424  | 106150000 | -0.61542 | 1.26E-17    |
| chr14 | 1.06E+08 | 1.06E+08 | 336  | 479  | 106200000 | -0.58394 | 3.80E-16    |
| chr14 | 1.06E+08 | 1.06E+08 | 659  | 747  | 106250000 | -0.2532  | 0.000171679 |
| chr14 | 1.06E+08 | 1.06E+08 | 970  | 1075 | 106300000 | -0.22065 | 0.00089253  |
| chr14 | 1.06E+08 | 1.06E+08 | 810  | 956  | 106350000 | -0.31146 | 5.62E-06    |
| chr14 | 1.06E+08 | 1.06E+08 | 550  | 648  | 106400000 | -0.30893 | 6.60E-06    |
| chr14 | 1.06E+08 | 1.07E+08 | 476  | 520  | 106450000 | -0.19992 | 0.002310648 |
| chr14 | 1.06E+08 | 1.07E+08 | 585  | 608  | 106500000 | -0.12801 | 0.034637821 |
| chr14 | 1.07E+08 | 1.07E+08 | 317  | 347  | 106600000 | -0.20282 | 0.002031865 |
| chr14 | 1.07E+08 | 1.07E+08 | 577  | 623  | 106800000 | -0.18303 | 0.004738751 |
| chr14 | 1.07E+08 | 1.07E+08 | 618  | 661  | 106850000 | -0.16942 | 0.008148787 |
| chrY  | 2750001  | 2850000  | 0    | 1    | 2800000   | #NAME?   | 1.59E-189   |
| chrY  | 2800001  | 2900000  | 0    | 4    | 2850000   | #NAME?   | 1.59E-189   |
| chrY  | 2850001  | 2950000  | 2    | 5    | 2900000   | -1.3943  | 1.23E-64    |
| chrY  | 2900001  | 3000000  | 5    | 2    | 2950000   | 1.249556 | 2.09E-53    |
| chrY  | 3000001  | 3100000  | 2    | 5    | 3050000   | -1.3943  | 1.23E-64    |
| chrY  | 3050001  | 3150000  | 1    | 2    | 3100000   | -1.07237 | 8.26E-44    |
| chrY  | 3600001  | 3700000  | 3    | 2    | 3650000   | 0.512591 | 8.10E-13    |
| chrY  | 3650001  | 3750000  | 3    | 2    | 3700000   | 0.512591 | 8.10E-13    |
| chrY  | 3900001  | 4000000  | 2    | 1    | 3950000   | 0.927628 | 7.06E-34    |

|      |          |          |      |      |          |          |             |
|------|----------|----------|------|------|----------|----------|-------------|
| chrY | 3950001  | 4050000  | 4    | 1    | 4.00E+06 | 1.927628 | 4.39E-93    |
| chrY | 4000001  | 4100000  | 2    | 1    | 4050000  | 0.927628 | 7.06E-34    |
| chrY | 4450001  | 4550000  | 1    | 3    | 4500000  | -1.65733 | 2.87E-81    |
| chrY | 4500001  | 4600000  | 0    | 2    | 4550000  | #NAME?   | 1.59E-189   |
| chrY | 4700001  | 4800000  | 0    | 1    | 4750000  | #NAME?   | 1.59E-189   |
| chrY | 4750001  | 4850000  | 0    | 1    | 4800000  | #NAME?   | 1.59E-189   |
| chrY | 5350001  | 5450000  | 2    | 1    | 5400000  | 0.927628 | 7.06E-34    |
| chrY | 5500001  | 5600000  | 5    | 4    | 5550000  | 0.249556 | 0.000220671 |
| chrY | 5550001  | 5650000  | 11   | 9    | 5600000  | 0.217135 | 0.001095891 |
| chrY | 5600001  | 5700000  | 8    | 6    | 5650000  | 0.342666 | 8.12E-07    |
| chrY | 5850001  | 5950000  | 0    | 1    | 5900000  | #NAME?   | 1.59E-189   |
| chrY | 5900001  | 6000000  | 1    | 4    | 5950000  | -2.07237 | 5.62E-105   |
| chrY | 5950001  | 6050000  | 3    | 4    | 6.00E+06 | -0.48741 | 5.63E-12    |
| chrY | 6000001  | 6100000  | 3    | 4    | 6050000  | -0.48741 | 5.63E-12    |
| chrY | 6050001  | 6150000  | 1    | 3    | 6100000  | -1.65733 | 2.87E-81    |
| chrY | 6350001  | 6450000  | 7    | 13   | 6400000  | -0.96546 | 4.15E-37    |
| chrY | 6400001  | 6500000  | 7    | 13   | 6450000  | -0.96546 | 4.15E-37    |
| chrY | 6550001  | 6650000  | 4    | 3    | 6600000  | 0.342666 | 8.12E-07    |
| chrY | 6650001  | 6750000  | 1    | 2    | 6700000  | -1.07237 | 8.26E-44    |
| chrY | 6700001  | 6800000  | 0    | 2    | 6750000  | #NAME?   | 1.59E-189   |
| chrY | 6800001  | 6900000  | 1    | 2    | 6850000  | -1.07237 | 8.26E-44    |
| chrY | 6850001  | 6950000  | 0    | 2    | 6900000  | #NAME?   | 1.59E-189   |
| chrY | 6900001  | 7000000  | 0    | 2    | 6950000  | #NAME?   | 1.59E-189   |
| chrY | 7000001  | 7100000  | 2    | 1    | 7050000  | 0.927628 | 7.06E-34    |
| chrY | 7050001  | 7150000  | 1    | 2    | 7100000  | -1.07237 | 8.26E-44    |
| chrY | 7100001  | 7200000  | 0    | 2    | 7150000  | #NAME?   | 1.59E-189   |
| chrY | 7250001  | 7350000  | 0    | 1    | 7300000  | #NAME?   | 1.59E-189   |
| chrY | 7450001  | 7550000  | 0    | 1    | 7500000  | #NAME?   | 1.59E-189   |
| chrY | 7500001  | 7600000  | 0    | 1    | 7550000  | #NAME?   | 1.59E-189   |
| chrY | 7650001  | 7750000  | 0    | 1    | 7700000  | #NAME?   | 1.59E-189   |
| chrY | 7700001  | 7800000  | 0    | 1    | 7750000  | #NAME?   | 1.59E-189   |
| chrY | 8050001  | 8150000  | 0    | 1    | 8100000  | #NAME?   | 1.59E-189   |
| chrY | 8200001  | 8300000  | 0    | 1    | 8250000  | #NAME?   | 1.59E-189   |
| chrY | 9350001  | 9450000  | 0    | 1    | 9400000  | #NAME?   | 1.59E-189   |
| chrY | 9400001  | 9500000  | 0    | 2    | 9450000  | #NAME?   | 1.59E-189   |
| chrY | 9450001  | 9550000  | 0    | 1    | 9500000  | #NAME?   | 1.59E-189   |
| chrY | 9900001  | 10000000 | 839  | 875  | 9950000  | -0.13298 | 0.029573889 |
| chrY | 9950001  | 10050000 | 1313 | 1425 | 1.00E+07 | -0.19047 | 0.003476037 |
| chrY | 10000001 | 10100000 | 764  | 841  | 10050000 | -0.2109  | 0.001409335 |
| chrY | 13050001 | 13150000 | 117  | 138  | 13100000 | -0.31053 | 5.96E-06    |
| chrY | 13100001 | 13200000 | 136  | 163  | 13150000 | -0.33364 | 1.31E-06    |
| chrY | 13150001 | 13250000 | 24   | 33   | 13200000 | -0.5318  | 8.01E-14    |
| chrY | 13250001 | 13350000 | 321  | 338  | 13300000 | -0.14682 | 0.018630143 |
| chrY | 13300001 | 13400000 | 85   | 98   | 13350000 | -0.27769 | 4.39E-05    |
| chrY | 13350001 | 13450000 | 325  | 414  | 13400000 | -0.42156 | 1.78E-09    |
| chrY | 13400001 | 13500000 | 2941 | 3405 | 13450000 | -0.28372 | 3.08E-05    |
| chrY | 13450001 | 13550000 | 2667 | 3044 | 13500000 | -0.26312 | 0.000100052 |

|      |          |          |     |     |          |          |             |
|------|----------|----------|-----|-----|----------|----------|-------------|
| chrY | 13500001 | 13600000 | 32  | 39  | 13550000 | -0.35777 | 2.43E-07    |
| chrY | 13550001 | 13650000 | 69  | 54  | 13600000 | 0.281265 | 3.86E-05    |
| chrY | 13600001 | 13700000 | 259 | 285 | 13650000 | -0.21038 | 0.001443637 |
| chrY | 13650001 | 13750000 | 248 | 304 | 13700000 | -0.3661  | 1.33E-07    |
| chrY | 13700001 | 13800000 | 52  | 64  | 13750000 | -0.37193 | 8.66E-08    |
| chrY | 13750001 | 13850000 | 431 | 494 | 13800000 | -0.26919 | 7.13E-05    |
| chrY | 13800001 | 13900000 | 673 | 820 | 13850000 | -0.35739 | 2.50E-07    |
| chrY | 13850001 | 13950000 | 248 | 330 | 13900000 | -0.4845  | 7.36E-12    |
| chrY | 13900001 | 14000000 | 7   | 5   | 13950000 | 0.413055 | 4.54E-09    |
| chrY | 13950001 | 14050000 | 3   | 2   | 1.40E+07 | 0.512591 | 8.10E-13    |
| chrY | 14000001 | 14100000 | 2   | 1   | 14050000 | 0.927628 | 7.06E-34    |
| chrY | 14100001 | 14200000 | 0   | 1   | 14150000 | #NAME?   | 1.59E-189   |
| chrY | 14150001 | 14250000 | 0   | 1   | 14200000 | #NAME?   | 1.59E-189   |
| chrY | 14500001 | 14600000 | 1   | 4   | 14550000 | -2.07237 | 5.62E-105   |
| chrY | 14550001 | 14650000 | 1   | 3   | 14600000 | -1.65733 | 2.87E-81    |
| chrY | 14850001 | 14950000 | 2   | 1   | 14900000 | 0.927628 | 7.06E-34    |
| chrY | 14950001 | 15050000 | 0   | 1   | 1.50E+07 | #NAME?   | 1.59E-189   |
| chrY | 15250001 | 15350000 | 0   | 1   | 15300000 | #NAME?   | 1.59E-189   |
| chrY | 15300001 | 15400000 | 0   | 2   | 15350000 | #NAME?   | 1.59E-189   |
| chrY | 15350001 | 15450000 | 0   | 1   | 15400000 | #NAME?   | 1.59E-189   |
| chrY | 15550001 | 15650000 | 0   | 4   | 15600000 | #NAME?   | 1.59E-189   |
| chrY | 15600001 | 15700000 | 0   | 4   | 15650000 | #NAME?   | 1.59E-189   |
| chrY | 15750001 | 15850000 | 2   | 1   | 15800000 | 0.927628 | 7.06E-34    |
| chrY | 15800001 | 15900000 | 3   | 2   | 15850000 | 0.512591 | 8.10E-13    |
| chrY | 15850001 | 15950000 | 1   | 3   | 15900000 | -1.65733 | 2.87E-81    |
| chrY | 15900001 | 16000000 | 1   | 4   | 15950000 | -2.07237 | 5.62E-105   |
| chrY | 15950001 | 16050000 | 1   | 3   | 1.60E+07 | -1.65733 | 2.87E-81    |
| chrY | 16200001 | 16300000 | 2   | 1   | 16250000 | 0.927628 | 7.06E-34    |
| chrY | 16250001 | 16350000 | 2   | 3   | 16300000 | -0.65733 | 1.11E-19    |
| chrY | 16300001 | 16400000 | 2   | 3   | 16350000 | -0.65733 | 1.11E-19    |
| chrY | 16350001 | 16450000 | 0   | 1   | 16400000 | #NAME?   | 1.59E-189   |
| chrY | 16550001 | 16650000 | 0   | 1   | 16600000 | #NAME?   | 1.59E-189   |
| chrY | 16600001 | 16700000 | 0   | 1   | 16650000 | #NAME?   | 1.59E-189   |
| chrY | 17300001 | 17400000 | 2   | 1   | 17350000 | 0.927628 | 7.06E-34    |
| chrY | 17400001 | 17500000 | 0   | 1   | 17450000 | #NAME?   | 1.59E-189   |
| chrY | 17500001 | 17600000 | 0   | 1   | 17550000 | #NAME?   | 1.59E-189   |
| chrY | 17550001 | 17650000 | 0   | 1   | 17600000 | #NAME?   | 1.59E-189   |
| chrY | 17700001 | 17800000 | 0   | 1   | 17750000 | #NAME?   | 1.59E-189   |
| chrY | 17750001 | 17850000 | 1   | 7   | 17800000 | -2.87973 | 1.87E-139   |
| chrY | 17800001 | 17900000 | 1   | 6   | 17850000 | -2.65733 | 1.79E-131   |
| chrY | 17900001 | 18000000 | 3   | 1   | 17950000 | 1.512591 | 1.57E-69    |
| chrY | 18000001 | 18100000 | 0   | 2   | 18050000 | #NAME?   | 1.59E-189   |
| chrY | 18050001 | 18150000 | 0   | 2   | 18100000 | #NAME?   | 1.59E-189   |
| chrY | 18100001 | 18200000 | 0   | 1   | 18150000 | #NAME?   | 1.59E-189   |
| chrY | 18200001 | 18300000 | 1   | 2   | 18250000 | -1.07237 | 8.26E-44    |
| chrY | 18250001 | 18350000 | 0   | 2   | 18300000 | #NAME?   | 1.59E-189   |
| chrY | 19450001 | 19550000 | 0   | 1   | 19500000 | #NAME?   | 1.59E-189   |

|      |          |          |      |      |          |          |             |
|------|----------|----------|------|------|----------|----------|-------------|
| chrY | 19500001 | 19600000 | 0    | 1    | 19550000 | #NAME?   | 1.59E-189   |
| chrY | 20350001 | 20450000 | 0    | 1    | 20400000 | #NAME?   | 1.59E-189   |
| chrY | 20400001 | 20500000 | 0    | 1    | 20450000 | #NAME?   | 1.59E-189   |
| chrY | 21000001 | 21100000 | 0    | 2    | 21050000 | #NAME?   | 1.59E-189   |
| chrY | 21050001 | 21150000 | 1    | 2    | 21100000 | -1.07237 | 8.26E-44    |
| chrY | 21100001 | 21200000 | 10   | 12   | 21150000 | -0.33541 | 1.16E-06    |
| chrY | 21150001 | 21250000 | 9    | 13   | 21200000 | -0.60289 | 4.96E-17    |
| chrY | 21300001 | 21400000 | 0    | 1    | 21350000 | #NAME?   | 1.59E-189   |
| chrY | 21500001 | 21600000 | 0    | 3    | 21550000 | #NAME?   | 1.59E-189   |
| chrY | 21550001 | 21650000 | 1    | 3    | 21600000 | -1.65733 | 2.87E-81    |
| chrY | 21650001 | 21750000 | 0    | 1    | 21700000 | #NAME?   | 1.59E-189   |
| chrY | 21700001 | 21800000 | 2    | 1    | 21750000 | 0.927628 | 7.06E-34    |
| chrY | 21900001 | 22000000 | 0    | 1    | 21950000 | #NAME?   | 1.59E-189   |
| chrY | 22100001 | 22200000 | 1    | 3    | 22150000 | -1.65733 | 2.87E-81    |
| chrY | 22150001 | 22250000 | 1    | 2    | 22200000 | -1.07237 | 8.26E-44    |
| chrY | 22550001 | 22650000 | 0    | 2    | 22600000 | #NAME?   | 1.59E-189   |
| chrY | 22600001 | 22700000 | 1    | 3    | 22650000 | -1.65733 | 2.87E-81    |
| chrY | 22700001 | 22800000 | 2    | 1    | 22750000 | 0.927628 | 7.06E-34    |
| chrY | 22750001 | 22850000 | 3    | 2    | 22800000 | 0.512591 | 8.10E-13    |
| chrY | 23000001 | 23100000 | 0    | 1    | 23050000 | #NAME?   | 1.59E-189   |
| chrY | 23150001 | 23250000 | 2    | 1    | 23200000 | 0.927628 | 7.06E-34    |
| chrY | 23250001 | 23350000 | 0    | 1    | 23300000 | #NAME?   | 1.59E-189   |
| chrY | 23300001 | 23400000 | 0    | 1    | 23350000 | #NAME?   | 1.59E-189   |
| chrY | 23450001 | 23550000 | 0    | 1    | 23500000 | #NAME?   | 1.59E-189   |
| chrY | 23500001 | 23600000 | 0    | 1    | 23550000 | #NAME?   | 1.59E-189   |
| chrY | 24300001 | 24400000 | 0    | 1    | 24350000 | #NAME?   | 1.59E-189   |
| chrY | 26050001 | 26150000 | 0    | 1    | 26100000 | #NAME?   | 1.59E-189   |
| chrY | 26100001 | 26200000 | 0    | 1    | 26150000 | #NAME?   | 1.59E-189   |
| chrY | 26350001 | 26450000 | 0    | 1    | 26400000 | #NAME?   | 1.59E-189   |
| chrY | 26400001 | 26500000 | 0    | 2    | 26450000 | #NAME?   | 1.59E-189   |
| chrY | 26450001 | 26550000 | 0    | 1    | 26500000 | #NAME?   | 1.59E-189   |
| chrY | 27500001 | 27600000 | 0    | 1    | 27550000 | #NAME?   | 1.59E-189   |
| chrY | 28300001 | 28400000 | 0    | 1    | 28350000 | #NAME?   | 1.59E-189   |
| chrY | 28350001 | 28450000 | 0    | 2    | 28400000 | #NAME?   | 1.59E-189   |
| chrY | 28450001 | 28550000 | 2    | 3    | 28500000 | -0.65733 | 1.11E-19    |
| chrY | 28500001 | 28600000 | 11   | 22   | 28550000 | -1.07237 | 8.26E-44    |
| chrY | 28550001 | 28650000 | 15   | 22   | 28600000 | -0.62491 | 4.39E-18    |
| chrY | 28600001 | 28700000 | 6    | 3    | 28650000 | 0.927628 | 7.06E-34    |
| chrY | 28650001 | 28750000 | 4    | 3    | 28700000 | 0.342666 | 8.12E-07    |
| chrY | 28700001 | 28800000 | 85   | 113  | 28750000 | -0.48316 | 8.33E-12    |
| chrY | 28750001 | 28850000 | 112  | 145  | 28800000 | -0.44493 | 2.50E-10    |
| chrY | 28800001 | 28900000 | 29   | 34   | 28850000 | -0.30185 | 1.03E-05    |
| chrY | 58750001 | 58850000 | 6    | 9    | 58800000 | -0.65733 | 1.11E-19    |
| chrY | 58800001 | 58900000 | 10   | 14   | 58850000 | -0.5578  | 5.82E-15    |
| chrY | 58850001 | 58950000 | 4    | 6    | 58900000 | -0.65733 | 1.11E-19    |
| chrY | 58900001 | 59000000 | 1665 | 2040 | 58950000 | -0.36542 | 1.40E-07    |
| chrY | 58950001 | 59050000 | 2528 | 2866 | 5.90E+07 | -0.25341 | 0.000169737 |



|       |         |         |      |      |          |          |             |
|-------|---------|---------|------|------|----------|----------|-------------|
| chr19 | 50001   | 150000  | 10   | 8    | 1.00E+05 | 0.249556 | 0.000220671 |
| chr19 | 100001  | 200000  | 6    | 4    | 150000   | 0.512591 | 8.10E-13    |
| chr19 | 150001  | 250000  | 12   | 15   | 2.00E+05 | -0.3943  | 1.58E-08    |
| chr19 | 300001  | 400000  | 848  | 895  | 350000   | -0.1502  | 0.016560733 |
| chr19 | 350001  | 450000  | 835  | 975  | 4.00E+05 | -0.296   | 1.48E-05    |
| chr19 | 400001  | 500000  | 864  | 1063 | 450000   | -0.37141 | 9.00E-08    |
| chr19 | 450001  | 550000  | 872  | 1067 | 5.00E+05 | -0.36353 | 1.61E-07    |
| chr19 | 500001  | 600000  | 812  | 1062 | 550000   | -0.4596  | 6.95E-11    |
| chr19 | 550001  | 650000  | 810  | 1087 | 6.00E+05 | -0.49673 | 2.36E-12    |
| chr19 | 600001  | 700000  | 832  | 1082 | 650000   | -0.45142 | 1.42E-10    |
| chr19 | 650001  | 750000  | 830  | 1015 | 7.00E+05 | -0.36267 | 1.71E-07    |
| chr19 | 700001  | 800000  | 832  | 918  | 750000   | -0.21428 | 0.001205321 |
| chr19 | 750001  | 850000  | 850  | 942  | 8.00E+05 | -0.22064 | 0.000893203 |
| chr19 | 800001  | 900000  | 885  | 1014 | 850000   | -0.26868 | 7.34E-05    |
| chr19 | 850001  | 950000  | 901  | 1014 | 9.00E+05 | -0.24283 | 0.000296297 |
| chr19 | 900001  | 1000000 | 915  | 1008 | 950000   | -0.21202 | 0.001338492 |
| chr19 | 950001  | 1050000 | 887  | 1059 | 1.00E+06 | -0.32807 | 1.90E-06    |
| chr19 | 1000001 | 1100000 | 931  | 1154 | 1050000  | -0.38216 | 4.02E-08    |
| chr19 | 1050001 | 1150000 | 1000 | 1248 | 1100000  | -0.39199 | 1.89E-08    |
| chr19 | 1100001 | 1200000 | 937  | 1160 | 1150000  | -0.38038 | 4.60E-08    |
| chr19 | 1150001 | 1250000 | 919  | 1162 | 1200000  | -0.41085 | 4.27E-09    |
| chr19 | 1200001 | 1300000 | 1003 | 1325 | 1250000  | -0.47404 | 1.91E-11    |
| chr19 | 1250001 | 1350000 | 909  | 1095 | 1300000  | -0.34095 | 7.94E-07    |
| chr19 | 1300001 | 1400000 | 897  | 1036 | 1350000  | -0.28022 | 3.79E-05    |
| chr19 | 1350001 | 1450000 | 985  | 1179 | 1400000  | -0.33174 | 1.49E-06    |
| chr19 | 1400001 | 1500000 | 945  | 1156 | 1450000  | -0.36313 | 1.65E-07    |
| chr19 | 1450001 | 1550000 | 907  | 1064 | 1500000  | -0.3027  | 9.77E-06    |
| chr19 | 1500001 | 1600000 | 899  | 1083 | 1550000  | -0.34101 | 7.91E-07    |
| chr19 | 1550001 | 1650000 | 949  | 1140 | 1600000  | -0.33693 | 1.05E-06    |
| chr19 | 1600001 | 1700000 | 901  | 1049 | 1650000  | -0.29179 | 1.91E-05    |
| chr19 | 1650001 | 1750000 | 835  | 1016 | 1700000  | -0.35542 | 2.88E-07    |
| chr19 | 1700001 | 1800000 | 914  | 1083 | 1750000  | -0.31714 | 3.90E-06    |
| chr19 | 1750001 | 1850000 | 947  | 1162 | 1800000  | -0.36755 | 1.20E-07    |
| chr19 | 1800001 | 1900000 | 865  | 1072 | 1850000  | -0.3819  | 4.10E-08    |
| chr19 | 1850001 | 1950000 | 823  | 1001 | 1900000  | -0.35485 | 3.00E-07    |
| chr19 | 1900001 | 2000000 | 878  | 1075 | 1950000  | -0.36442 | 1.51E-07    |
| chr19 | 1950001 | 2050000 | 931  | 1025 | 2.00E+06 | -0.21114 | 0.001394004 |
| chr19 | 2050001 | 2150000 | 909  | 1027 | 2100000  | -0.24846 | 0.000220904 |
| chr19 | 2100001 | 2200000 | 927  | 1073 | 2150000  | -0.28338 | 3.15E-05    |
| chr19 | 2150001 | 2250000 | 1007 | 1165 | 2200000  | -0.28264 | 3.29E-05    |
| chr19 | 2200001 | 2300000 | 968  | 1117 | 2250000  | -0.27892 | 4.08E-05    |
| chr19 | 2250001 | 2350000 | 884  | 1057 | 2300000  | -0.33023 | 1.65E-06    |
| chr19 | 2300001 | 2400000 | 898  | 1090 | 2350000  | -0.35191 | 3.69E-07    |
| chr19 | 2350001 | 2450000 | 858  | 949  | 2400000  | -0.2178  | 0.001021849 |
| chr19 | 2400001 | 2500000 | 805  | 903  | 2450000  | -0.23811 | 0.000377459 |
| chr19 | 2450001 | 2550000 | 781  | 870  | 2500000  | -0.22806 | 0.000623452 |
| chr19 | 2500001 | 2600000 | 780  | 840  | 2550000  | -0.17929 | 0.00551887  |

|       |         |         |      |      |          |          |             |
|-------|---------|---------|------|------|----------|----------|-------------|
| chr19 | 2550001 | 2650000 | 814  | 859  | 2600000  | -0.15    | 0.016674203 |
| chr19 | 2650001 | 2750000 | 863  | 948  | 2700000  | -0.2079  | 0.001617056 |
| chr19 | 2700001 | 2800000 | 894  | 1092 | 2750000  | -0.361   | 1.93E-07    |
| chr19 | 2750001 | 2850000 | 888  | 1089 | 2800000  | -0.36674 | 1.27E-07    |
| chr19 | 2800001 | 2900000 | 830  | 915  | 2850000  | -0.21303 | 0.001277451 |
| chr19 | 2850001 | 2950000 | 751  | 802  | 2900000  | -0.16716 | 0.008885529 |
| chr19 | 2900001 | 3000000 | 753  | 799  | 2950000  | -0.15792 | 0.012552927 |
| chr19 | 3050001 | 3150000 | 862  | 950  | 3100000  | -0.21261 | 0.001302603 |
| chr19 | 3100001 | 3200000 | 895  | 991  | 3150000  | -0.21937 | 0.000948749 |
| chr19 | 3150001 | 3250000 | 931  | 1058 | 3200000  | -0.25686 | 0.000140983 |
| chr19 | 3200001 | 3300000 | 958  | 1076 | 3250000  | -0.23995 | 0.000343579 |
| chr19 | 3250001 | 3350000 | 916  | 980  | 3300000  | -0.16981 | 0.008026707 |
| chr19 | 3300001 | 3400000 | 909  | 963  | 3350000  | -0.15563 | 0.013642957 |
| chr19 | 3350001 | 3450000 | 894  | 926  | 3400000  | -0.12311 | 0.040296362 |
| chr19 | 3400001 | 3500000 | 921  | 1035 | 3450000  | -0.24073 | 0.000330162 |
| chr19 | 3450001 | 3550000 | 1028 | 1124 | 3500000  | -0.20117 | 0.002186429 |
| chr19 | 3500001 | 3600000 | 920  | 999  | 3550000  | -0.19122 | 0.003366373 |
| chr19 | 3550001 | 3650000 | 891  | 1118 | 3600000  | -0.39979 | 1.03E-08    |
| chr19 | 3600001 | 3700000 | 1007 | 1274 | 3650000  | -0.41167 | 3.99E-09    |
| chr19 | 3650001 | 3750000 | 904  | 1049 | 3700000  | -0.28699 | 2.54E-05    |
| chr19 | 3700001 | 3800000 | 874  | 952  | 3750000  | -0.1957  | 0.002778298 |
| chr19 | 3750001 | 3850000 | 948  | 1052 | 3800000  | -0.22255 | 0.000815041 |
| chr19 | 3800001 | 3900000 | 876  | 985  | 3850000  | -0.24156 | 0.00031629  |
| chr19 | 3850001 | 3950000 | 796  | 846  | 3900000  | -0.16026 | 0.011516504 |
| chr19 | 3900001 | 4000000 | 795  | 822  | 3950000  | -0.12056 | 0.043533183 |
| chr19 | 3950001 | 4050000 | 906  | 980  | 4.00E+06 | -0.18564 | 0.004255058 |
| chr19 | 4000001 | 4100000 | 979  | 1088 | 4050000  | -0.22467 | 0.000735694 |
| chr19 | 4050001 | 4150000 | 887  | 996  | 4100000  | -0.23958 | 0.000350123 |
| chr19 | 4100001 | 4200000 | 800  | 903  | 4150000  | -0.2471  | 0.000237254 |
| chr19 | 4150001 | 4250000 | 803  | 874  | 4200000  | -0.19461 | 0.002912826 |
| chr19 | 4200001 | 4300000 | 800  | 842  | 4250000  | -0.14619 | 0.019039936 |
| chr19 | 4250001 | 4350000 | 798  | 907  | 4300000  | -0.25709 | 0.000139257 |
| chr19 | 4300001 | 4400000 | 901  | 1023 | 4350000  | -0.25558 | 0.000151084 |
| chr19 | 4350001 | 4450000 | 965  | 1003 | 4400000  | -0.12809 | 0.034544558 |
| chr19 | 4400001 | 4500000 | 888  | 951  | 4450000  | -0.17126 | 0.00758718  |
| chr19 | 4450001 | 4550000 | 888  | 990  | 4500000  | -0.22924 | 0.000588425 |
| chr19 | 4500001 | 4600000 | 914  | 1000 | 4550000  | -0.20211 | 0.002097899 |
| chr19 | 4550001 | 4650000 | 815  | 915  | 4600000  | -0.23934 | 0.000354442 |
| chr19 | 4600001 | 4700000 | 875  | 970  | 4650000  | -0.22107 | 0.000874727 |
| chr19 | 4650001 | 4750000 | 949  | 1037 | 4700000  | -0.20031 | 0.00227169  |
| chr19 | 4850001 | 4950000 | 724  | 754  | 4900000  | -0.13095 | 0.031566826 |
| chr19 | 4900001 | 5000000 | 851  | 880  | 4950000  | -0.12072 | 0.04332328  |
| chr19 | 4950001 | 5050000 | 921  | 983  | 5.00E+06 | -0.16636 | 0.009160409 |
| chr19 | 5000001 | 5100000 | 1013 | 1117 | 5050000  | -0.21337 | 0.001257768 |
| chr19 | 5050001 | 5150000 | 1090 | 1217 | 5100000  | -0.23137 | 0.000529528 |
| chr19 | 5100001 | 5200000 | 929  | 1012 | 5150000  | -0.19583 | 0.002762647 |
| chr19 | 5150001 | 5250000 | 842  | 926  | 5200000  | -0.20956 | 0.001498775 |

|       |          |          |     |      |          |          |             |
|-------|----------|----------|-----|------|----------|----------|-------------|
| chr19 | 5200001  | 5300000  | 972 | 1108 | 5250000  | -0.2613  | 0.00011062  |
| chr19 | 5300001  | 5400000  | 942 | 989  | 5350000  | -0.14262 | 0.021516115 |
| chr19 | 5350001  | 5450000  | 863 | 975  | 5400000  | -0.24841 | 0.000221398 |
| chr19 | 5500001  | 5600000  | 845 | 892  | 5550000  | -0.15046 | 0.016404585 |
| chr19 | 5600001  | 5700000  | 924 | 1007 | 5650000  | -0.19647 | 0.002687019 |
| chr19 | 5650001  | 5750000  | 782 | 940  | 5700000  | -0.33786 | 9.82E-07    |
| chr19 | 5700001  | 5800000  | 749 | 853  | 5750000  | -0.25995 | 0.000119122 |
| chr19 | 5750001  | 5850000  | 821 | 908  | 5800000  | -0.21768 | 0.001027673 |
| chr19 | 5950001  | 6050000  | 995 | 1058 | 6.00E+06 | -0.16094 | 0.011229265 |
| chr19 | 6000001  | 6100000  | 963 | 1020 | 6050000  | -0.15533 | 0.013788683 |
| chr19 | 6150001  | 6250000  | 985 | 1096 | 6200000  | -0.22642 | 0.00067555  |
| chr19 | 6200001  | 6300000  | 964 | 1096 | 6250000  | -0.25751 | 0.000136053 |
| chr19 | 6300001  | 6400000  | 707 | 774  | 6350000  | -0.203   | 0.002016481 |
| chr19 | 6450001  | 6550000  | 850 | 936  | 6500000  | -0.21142 | 0.001376466 |
| chr19 | 6550001  | 6650000  | 786 | 675  | 6600000  | 0.14727  | 0.01858379  |
| chr19 | 6650001  | 6750000  | 937 | 1057 | 6700000  | -0.24623 | 0.000248336 |
| chr19 | 6700001  | 6800000  | 919 | 1049 | 6750000  | -0.26325 | 9.93E-05    |
| chr19 | 6850001  | 6950000  | 793 | 822  | 6900000  | -0.12419 | 0.038987596 |
| chr19 | 7000001  | 7100000  | 426 | 445  | 7050000  | -0.13532 | 0.027415495 |
| chr19 | 7200001  | 7300000  | 814 | 864  | 7250000  | -0.15837 | 0.01234475  |
| chr19 | 7250001  | 7350000  | 427 | 449  | 7300000  | -0.14485 | 0.019938166 |
| chr19 | 7300001  | 7400000  | 79  | 64   | 7350000  | 0.231409 | 0.000553493 |
| chr19 | 7500001  | 7600000  | 914 | 1017 | 7550000  | -0.22643 | 0.000675503 |
| chr19 | 7550001  | 7650000  | 807 | 962  | 7600000  | -0.32584 | 2.21E-06    |
| chr19 | 7600001  | 7700000  | 888 | 1021 | 7650000  | -0.27372 | 5.51E-05    |
| chr19 | 7650001  | 7750000  | 979 | 1049 | 7700000  | -0.17201 | 0.007369015 |
| chr19 | 7750001  | 7850000  | 844 | 901  | 7800000  | -0.16666 | 0.00905847  |
| chr19 | 7800001  | 7900000  | 795 | 855  | 7850000  | -0.17734 | 0.005967631 |
| chr19 | 7850001  | 7950000  | 898 | 980  | 7900000  | -0.19844 | 0.002466172 |
| chr19 | 7900001  | 8000000  | 986 | 1145 | 7950000  | -0.28806 | 2.38E-05    |
| chr19 | 7950001  | 8050000  | 924 | 1056 | 8.00E+06 | -0.26502 | 9.01E-05    |
| chr19 | 8000001  | 8100000  | 870 | 929  | 8050000  | -0.16703 | 0.008928431 |
| chr19 | 8050001  | 8150000  | 845 | 894  | 8100000  | -0.1537  | 0.014625281 |
| chr19 | 8100001  | 8200000  | 882 | 962  | 8150000  | -0.19763 | 0.002554809 |
| chr19 | 8250001  | 8350000  | 671 | 713  | 8300000  | -0.15996 | 0.011644842 |
| chr19 | 8550001  | 8650000  | 828 | 865  | 8600000  | -0.13544 | 0.027310703 |
| chr19 | 8650001  | 8750000  | 428 | 465  | 8700000  | -0.19199 | 0.003257991 |
| chr19 | 8700001  | 8800000  | 545 | 600  | 8750000  | -0.21108 | 0.001398154 |
| chr19 | 9850001  | 9950000  | 746 | 795  | 9900000  | -0.16415 | 0.009960259 |
| chr19 | 9900001  | 10000000 | 836 | 902  | 9950000  | -0.182   | 0.004944075 |
| chr19 | 9950001  | 10050000 | 892 | 945  | 1.00E+07 | -0.15564 | 0.013635502 |
| chr19 | 10000001 | 10100000 | 887 | 928  | 10050000 | -0.13756 | 0.025475046 |
| chr19 | 10050001 | 10150000 | 946 | 998  | 10100000 | -0.14957 | 0.016927807 |
| chr19 | 10100001 | 10200000 | 908 | 992  | 10150000 | -0.20002 | 0.002300719 |
| chr19 | 10150001 | 10250000 | 923 | 963  | 10200000 | -0.13358 | 0.029013942 |
| chr19 | 10350001 | 10450000 | 824 | 871  | 10400000 | -0.1524  | 0.01531742  |
| chr19 | 10400001 | 10500000 | 826 | 866  | 10450000 | -0.1406  | 0.023030063 |

|       |          |          |      |      |          |          |             |
|-------|----------|----------|------|------|----------|----------|-------------|
| chr19 | 10450001 | 10550000 | 802  | 884  | 10500000 | -0.21282 | 0.001290323 |
| chr19 | 10500001 | 10600000 | 826  | 883  | 10550000 | -0.16864 | 0.008394745 |
| chr19 | 10550001 | 10650000 | 766  | 853  | 10600000 | -0.22757 | 0.000638655 |
| chr19 | 10600001 | 10700000 | 771  | 855  | 10650000 | -0.22157 | 0.000854378 |
| chr19 | 10750001 | 10850000 | 826  | 893  | 10800000 | -0.18489 | 0.004389732 |
| chr19 | 10800001 | 10900000 | 849  | 884  | 10850000 | -0.13065 | 0.031862393 |
| chr19 | 10900001 | 11000000 | 943  | 998  | 10950000 | -0.15415 | 0.01438677  |
| chr19 | 10950001 | 11050000 | 895  | 959  | 1.10E+07 | -0.17201 | 0.007366362 |
| chr19 | 11050001 | 11150000 | 862  | 934  | 11100000 | -0.18811 | 0.003839518 |
| chr19 | 11100001 | 11200000 | 897  | 977  | 11150000 | -0.19562 | 0.002787658 |
| chr19 | 11150001 | 11250000 | 776  | 815  | 11200000 | -0.14312 | 0.021154394 |
| chr19 | 11200001 | 11300000 | 730  | 783  | 11250000 | -0.17349 | 0.006953232 |
| chr19 | 11250001 | 11350000 | 846  | 910  | 11300000 | -0.17758 | 0.005910736 |
| chr19 | 11300001 | 11400000 | 900  | 954  | 11350000 | -0.15644 | 0.013249006 |
| chr19 | 11450001 | 11550000 | 802  | 865  | 11500000 | -0.18147 | 0.00505142  |
| chr19 | 11500001 | 11600000 | 842  | 920  | 11550000 | -0.20019 | 0.002283971 |
| chr19 | 11550001 | 11650000 | 876  | 972  | 11600000 | -0.2224  | 0.00082095  |
| chr19 | 11600001 | 11700000 | 821  | 850  | 11650000 | -0.12245 | 0.041109426 |
| chr19 | 12100001 | 12200000 | 728  | 638  | 12150000 | 0.11801  | 0.047301896 |
| chr19 | 12300001 | 12400000 | 845  | 732  | 12350000 | 0.134736 | 0.028232197 |
| chr19 | 12350001 | 12450000 | 836  | 728  | 12400000 | 0.127193 | 0.035842134 |
| chr19 | 12750001 | 12850000 | 846  | 926  | 12800000 | -0.20273 | 0.00204078  |
| chr19 | 12800001 | 12900000 | 884  | 998  | 12850000 | -0.24737 | 0.000233947 |
| chr19 | 12850001 | 12950000 | 897  | 990  | 12900000 | -0.21469 | 0.001182497 |
| chr19 | 12900001 | 13000000 | 888  | 937  | 12950000 | -0.14986 | 0.016756448 |
| chr19 | 12950001 | 13050000 | 850  | 909  | 1.30E+07 | -0.16919 | 0.008220139 |
| chr19 | 13050001 | 13150000 | 1017 | 1049 | 13100000 | -0.11707 | 0.048291148 |
| chr19 | 13100001 | 13200000 | 1113 | 1170 | 13150000 | -0.14443 | 0.020229899 |
| chr19 | 13150001 | 13250000 | 1045 | 1120 | 13200000 | -0.17237 | 0.007265506 |
| chr19 | 13200001 | 13300000 | 828  | 934  | 13250000 | -0.24616 | 0.000249151 |
| chr19 | 13250001 | 13350000 | 766  | 837  | 13300000 | -0.20026 | 0.002276973 |
| chr19 | 13600001 | 13700000 | 961  | 834  | 13650000 | 0.132117 | 0.030704788 |
| chr19 | 13750001 | 13850000 | 839  | 731  | 13800000 | 0.126428 | 0.036700398 |
| chr19 | 13900001 | 14000000 | 908  | 977  | 13950000 | -0.17804 | 0.00580334  |
| chr19 | 13950001 | 14050000 | 895  | 1008 | 1.40E+07 | -0.24391 | 0.000280216 |
| chr19 | 14000001 | 14100000 | 885  | 951  | 14050000 | -0.17614 | 0.006260734 |
| chr19 | 14150001 | 14250000 | 865  | 904  | 14200000 | -0.13599 | 0.026821589 |
| chr19 | 14200001 | 14300000 | 928  | 975  | 14250000 | -0.14365 | 0.020773738 |
| chr19 | 14250001 | 14350000 | 600  | 647  | 14300000 | -0.18117 | 0.005112394 |
| chr19 | 14550001 | 14650000 | 845  | 886  | 14600000 | -0.14073 | 0.022929817 |
| chr19 | 14600001 | 14700000 | 798  | 866  | 14650000 | -0.19035 | 0.003493257 |
| chr19 | 14650001 | 14750000 | 785  | 811  | 14700000 | -0.11938 | 0.045090519 |
| chr19 | 15150001 | 15250000 | 924  | 975  | 15200000 | -0.14988 | 0.016744677 |
| chr19 | 15200001 | 15300000 | 967  | 1012 | 15250000 | -0.13799 | 0.025115206 |
| chr19 | 15250001 | 15350000 | 908  | 946  | 15300000 | -0.13152 | 0.03099533  |
| chr19 | 15450001 | 15550000 | 853  | 919  | 15500000 | -0.17989 | 0.005385824 |
| chr19 | 15500001 | 15600000 | 949  | 1073 | 15550000 | -0.24954 | 0.000208594 |

|       |          |          |      |      |          |          |             |
|-------|----------|----------|------|------|----------|----------|-------------|
| chr19 | 15550001 | 15650000 | 843  | 911  | 15600000 | -0.18429 | 0.004499858 |
| chr19 | 15600001 | 15700000 | 803  | 845  | 15650000 | -0.14592 | 0.019217239 |
| chr19 | 15650001 | 15750000 | 833  | 888  | 15700000 | -0.16461 | 0.00978753  |
| chr19 | 15850001 | 15950000 | 842  | 880  | 15900000 | -0.13606 | 0.02676842  |
| chr19 | 16400001 | 16500000 | 896  | 942  | 16450000 | -0.1446  | 0.020110286 |
| chr19 | 16600001 | 16700000 | 898  | 1005 | 16650000 | -0.23478 | 0.000446649 |
| chr19 | 16650001 | 16750000 | 971  | 1099 | 16700000 | -0.25102 | 0.00019287  |
| chr19 | 16700001 | 16800000 | 953  | 986  | 16750000 | -0.12148 | 0.042333612 |
| chr19 | 16900001 | 17000000 | 895  | 929  | 16950000 | -0.12616 | 0.036686236 |
| chr19 | 16950001 | 17050000 | 952  | 1006 | 1.70E+07 | -0.15197 | 0.015554233 |
| chr19 | 17250001 | 17350000 | 855  | 934  | 17300000 | -0.19987 | 0.002315936 |
| chr19 | 17300001 | 17400000 | 912  | 949  | 17350000 | -0.12975 | 0.032792436 |
| chr19 | 17350001 | 17450000 | 924  | 954  | 17400000 | -0.11847 | 0.046331935 |
| chr19 | 17400001 | 17500000 | 855  | 900  | 17450000 | -0.14637 | 0.018921795 |
| chr19 | 17750001 | 17850000 | 866  | 896  | 17800000 | -0.1215  | 0.042307704 |
| chr19 | 17800001 | 17900000 | 814  | 872  | 17850000 | -0.17167 | 0.007465871 |
| chr19 | 18000001 | 18100000 | 756  | 808  | 18050000 | -0.16834 | 0.008492949 |
| chr19 | 18050001 | 18150000 | 752  | 895  | 18100000 | -0.32353 | 2.57E-06    |
| chr19 | 18100001 | 18200000 | 745  | 851  | 18150000 | -0.26429 | 9.38E-05    |
| chr19 | 18150001 | 18250000 | 861  | 925  | 18200000 | -0.17581 | 0.006342865 |
| chr19 | 18200001 | 18300000 | 889  | 924  | 18250000 | -0.12808 | 0.03455682  |
| chr19 | 18250001 | 18350000 | 849  | 928  | 18300000 | -0.20073 | 0.002229534 |
| chr19 | 18300001 | 18400000 | 888  | 936  | 18350000 | -0.14832 | 0.017684891 |
| chr19 | 18350001 | 18450000 | 921  | 976  | 18400000 | -0.15605 | 0.013434942 |
| chr19 | 18400001 | 18500000 | 859  | 965  | 18450000 | -0.24024 | 0.000338509 |
| chr19 | 18450001 | 18550000 | 812  | 985  | 18500000 | -0.35102 | 3.94E-07    |
| chr19 | 18500001 | 18600000 | 922  | 1134 | 18550000 | -0.37095 | 9.31E-08    |
| chr19 | 18550001 | 18650000 | 983  | 1123 | 18600000 | -0.26447 | 9.29E-05    |
| chr19 | 18600001 | 18700000 | 840  | 957  | 18650000 | -0.2605  | 0.000115588 |
| chr19 | 18650001 | 18750000 | 825  | 946  | 18700000 | -0.26982 | 6.88E-05    |
| chr19 | 18700001 | 18800000 | 916  | 1083 | 18750000 | -0.31399 | 4.78E-06    |
| chr19 | 18750001 | 18850000 | 943  | 1015 | 18800000 | -0.17852 | 0.005691636 |
| chr19 | 18800001 | 18900000 | 1024 | 1066 | 18850000 | -0.13036 | 0.03215727  |
| chr19 | 18850001 | 18950000 | 948  | 1042 | 18900000 | -0.20877 | 0.001554258 |
| chr19 | 18900001 | 19000000 | 927  | 994  | 18950000 | -0.17305 | 0.007074274 |
| chr19 | 18950001 | 19050000 | 934  | 1072 | 1.90E+07 | -0.27118 | 6.37E-05    |
| chr19 | 19000001 | 19100000 | 772  | 910  | 19050000 | -0.30964 | 6.31E-06    |
| chr19 | 19050001 | 19150000 | 829  | 868  | 19100000 | -0.13869 | 0.024538432 |
| chr19 | 19150001 | 19250000 | 904  | 933  | 19200000 | -0.11793 | 0.04708209  |
| chr19 | 19300001 | 19400000 | 955  | 986  | 19350000 | -0.11846 | 0.046344999 |
| chr19 | 19450001 | 19550000 | 876  | 910  | 19500000 | -0.12731 | 0.035403061 |
| chr19 | 19550001 | 19650000 | 1025 | 1090 | 19600000 | -0.16108 | 0.011173967 |
| chr19 | 19600001 | 19700000 | 952  | 1085 | 19650000 | -0.26103 | 0.000112262 |
| chr19 | 19650001 | 19750000 | 873  | 934  | 19700000 | -0.16981 | 0.008024614 |
| chr19 | 20200001 | 20300000 | 603  | 527  | 20250000 | 0.121983 | 0.042025435 |
| chr19 | 20250001 | 20350000 | 652  | 532  | 20300000 | 0.221074 | 0.000910841 |
| chr19 | 20300001 | 20400000 | 660  | 545  | 20350000 | 0.203838 | 0.002005536 |

|       |          |          |      |      |          |          |             |
|-------|----------|----------|------|------|----------|----------|-------------|
| chr19 | 20350001 | 20450000 | 663  | 570  | 20400000 | 0.145675 | 0.019628875 |
| chr19 | 20400001 | 20500000 | 685  | 589  | 20450000 | 0.145465 | 0.01977055  |
| chr19 | 20700001 | 20800000 | 583  | 605  | 20750000 | -0.12581 | 0.037087981 |
| chr19 | 20800001 | 20900000 | 709  | 612  | 20850000 | 0.139882 | 0.023856117 |
| chr19 | 20950001 | 21050000 | 593  | 520  | 2.10E+07 | 0.117149 | 0.048513645 |
| chr19 | 21100001 | 21200000 | 788  | 655  | 21150000 | 0.194329 | 0.003031843 |
| chr19 | 21150001 | 21250000 | 730  | 636  | 21200000 | 0.126498 | 0.036620846 |
| chr19 | 21200001 | 21300000 | 730  | 633  | 21250000 | 0.133319 | 0.02954842  |
| chr19 | 22000001 | 22100000 | 703  | 733  | 22050000 | -0.13266 | 0.029883348 |
| chr19 | 22050001 | 22150000 | 635  | 657  | 22100000 | -0.12151 | 0.042301225 |
| chr19 | 22150001 | 22250000 | 614  | 526  | 22200000 | 0.150804 | 0.016436225 |
| chr19 | 22200001 | 22300000 | 775  | 650  | 22250000 | 0.181385 | 0.00518798  |
| chr19 | 22250001 | 22350000 | 701  | 605  | 22300000 | 0.140108 | 0.023678379 |
| chr19 | 22300001 | 22400000 | 584  | 496  | 22350000 | 0.163256 | 0.010480862 |
| chr19 | 22350001 | 22450000 | 599  | 497  | 22400000 | 0.196938 | 0.002711056 |
| chr19 | 22400001 | 22500000 | 619  | 525  | 22450000 | 0.16525  | 0.009728041 |
| chr19 | 23300001 | 23400000 | 738  | 627  | 23350000 | 0.162784 | 0.010666719 |
| chr19 | 23500001 | 23600000 | 757  | 657  | 23550000 | 0.132028 | 0.030792006 |
| chr19 | 23700001 | 23800000 | 706  | 737  | 23750000 | -0.13437 | 0.028280472 |
| chr19 | 23800001 | 23900000 | 735  | 628  | 23850000 | 0.154608 | 0.014366468 |
| chr19 | 23850001 | 23950000 | 746  | 607  | 23900000 | 0.225107 | 0.000751584 |
| chr19 | 23900001 | 24000000 | 771  | 662  | 23950000 | 0.147528 | 0.018419381 |
| chr19 | 24600001 | 24700000 | 32   | 37   | 24650000 | -0.28183 | 3.45E-05    |
| chr19 | 27900001 | 28000000 | 708  | 620  | 27950000 | 0.119109 | 0.045791476 |
| chr19 | 27950001 | 28050000 | 747  | 647  | 2.80E+07 | 0.134971 | 0.028018823 |
| chr19 | 29350001 | 29450000 | 978  | 1014 | 29400000 | -0.12452 | 0.038590295 |
| chr19 | 29700001 | 29800000 | 918  | 1008 | 29750000 | -0.2073  | 0.001661483 |
| chr19 | 29750001 | 29850000 | 1014 | 1089 | 29800000 | -0.17532 | 0.006468416 |
| chr19 | 29950001 | 30050000 | 960  | 1073 | 3.00E+07 | -0.23292 | 0.000490375 |
| chr19 | 30000001 | 30100000 | 1028 | 1095 | 30050000 | -0.16346 | 0.010221551 |
| chr19 | 30100001 | 30200000 | 973  | 1032 | 30150000 | -0.1573  | 0.012837668 |
| chr19 | 30250001 | 30350000 | 875  | 989  | 30300000 | -0.24906 | 0.000213982 |
| chr19 | 30300001 | 30400000 | 821  | 921  | 30350000 | -0.23819 | 0.000375893 |
| chr19 | 30350001 | 30450000 | 809  | 866  | 30400000 | -0.1706  | 0.007783827 |
| chr19 | 30550001 | 30650000 | 1073 | 1138 | 30600000 | -0.15722 | 0.012875519 |
| chr19 | 30600001 | 30700000 | 973  | 1032 | 30650000 | -0.1573  | 0.012837668 |
| chr19 | 30950001 | 31050000 | 1007 | 1076 | 3.10E+07 | -0.16799 | 0.008609335 |
| chr19 | 31000001 | 31100000 | 1074 | 1109 | 31050000 | -0.11864 | 0.046100111 |
| chr19 | 31150001 | 31250000 | 1072 | 1136 | 31200000 | -0.15603 | 0.013445685 |
| chr19 | 31300001 | 31400000 | 1008 | 1042 | 31350000 | -0.12023 | 0.043958326 |
| chr19 | 31550001 | 31650000 | 1091 | 1152 | 31600000 | -0.15086 | 0.016176263 |
| chr19 | 31600001 | 31700000 | 1074 | 1114 | 31650000 | -0.12513 | 0.037879754 |
| chr19 | 32300001 | 32400000 | 1098 | 913  | 32350000 | 0.19382  | 0.003098335 |
| chr19 | 32350001 | 32450000 | 1072 | 918  | 32400000 | 0.151367 | 0.016114595 |
| chr19 | 33400001 | 33500000 | 755  | 651  | 33450000 | 0.141447 | 0.022644471 |
| chr19 | 33600001 | 33700000 | 806  | 903  | 33650000 | -0.23632 | 0.000413336 |
| chr19 | 33650001 | 33750000 | 1018 | 1120 | 33700000 | -0.21013 | 0.0014602   |

|       |          |          |      |      |          |          |             |
|-------|----------|----------|------|------|----------|----------|-------------|
| chr19 | 33700001 | 33800000 | 1143 | 1248 | 33750000 | -0.19916 | 0.002388902 |
| chr19 | 33750001 | 33850000 | 1002 | 1039 | 33800000 | -0.12468 | 0.038398807 |
| chr19 | 33800001 | 33900000 | 999  | 1030 | 33850000 | -0.11646 | 0.049160465 |
| chr19 | 33850001 | 33950000 | 1080 | 1186 | 33900000 | -0.20744 | 0.001650731 |
| chr19 | 33900001 | 34000000 | 1074 | 1172 | 33950000 | -0.19835 | 0.002475658 |
| chr19 | 33950001 | 34050000 | 1016 | 1167 | 3.40E+07 | -0.27228 | 5.99E-05    |
| chr19 | 34000001 | 34100000 | 938  | 1052 | 34050000 | -0.23785 | 0.000382526 |
| chr19 | 34100001 | 34200000 | 1010 | 1048 | 34150000 | -0.12566 | 0.037267162 |
| chr19 | 34150001 | 34250000 | 1060 | 1106 | 34200000 | -0.13366 | 0.028937232 |
| chr19 | 34200001 | 34300000 | 1126 | 1188 | 34250000 | -0.1497  | 0.016851697 |
| chr19 | 34800001 | 34900000 | 947  | 980  | 34850000 | -0.12179 | 0.041944087 |
| chr19 | 34900001 | 35000000 | 914  | 955  | 34950000 | -0.13568 | 0.027100102 |
| chr19 | 34950001 | 35050000 | 870  | 936  | 3.50E+07 | -0.17786 | 0.005843787 |
| chr19 | 35050001 | 35150000 | 846  | 880  | 35100000 | -0.12922 | 0.033344189 |
| chr19 | 35300001 | 35400000 | 966  | 999  | 35350000 | -0.12083 | 0.043170996 |
| chr19 | 35350001 | 35450000 | 883  | 921  | 35400000 | -0.13316 | 0.029407215 |
| chr19 | 35400001 | 35500000 | 922  | 1014 | 35450000 | -0.20959 | 0.001496922 |
| chr19 | 35450001 | 35550000 | 927  | 1086 | 35500000 | -0.30075 | 1.10E-05    |
| chr19 | 35500001 | 35600000 | 983  | 1019 | 35550000 | -0.12426 | 0.038900172 |
| chr19 | 35600001 | 35700000 | 1023 | 1080 | 35650000 | -0.1506  | 0.016327951 |
| chr19 | 35700001 | 35800000 | 974  | 1030 | 35750000 | -0.15302 | 0.014981416 |
| chr19 | 35750001 | 35850000 | 959  | 1089 | 35800000 | -0.25577 | 0.000149509 |
| chr19 | 35950001 | 36050000 | 1028 | 1087 | 3.60E+07 | -0.15288 | 0.015055906 |
| chr19 | 36000001 | 36100000 | 913  | 1048 | 36050000 | -0.27132 | 6.32E-05    |
| chr19 | 36050001 | 36150000 | 851  | 943  | 36100000 | -0.22047 | 0.000900288 |
| chr19 | 36100001 | 36200000 | 839  | 869  | 36150000 | -0.12306 | 0.040360253 |
| chr19 | 36150001 | 36250000 | 916  | 1027 | 36200000 | -0.23739 | 0.000391528 |
| chr19 | 36200001 | 36300000 | 1008 | 1168 | 36250000 | -0.28492 | 2.87E-05    |
| chr19 | 36250001 | 36350000 | 925  | 989  | 36300000 | -0.16889 | 0.008315808 |
| chr19 | 36300001 | 36400000 | 895  | 1019 | 36350000 | -0.25957 | 0.000121661 |
| chr19 | 36350001 | 36450000 | 857  | 1024 | 36400000 | -0.32922 | 1.76E-06    |
| chr19 | 36400001 | 36500000 | 868  | 930  | 36450000 | -0.17191 | 0.007397339 |
| chr19 | 36450001 | 36550000 | 924  | 992  | 36500000 | -0.17482 | 0.006597525 |
| chr19 | 36500001 | 36600000 | 968  | 1023 | 36550000 | -0.1521  | 0.015482366 |
| chr19 | 36600001 | 36700000 | 746  | 800  | 36650000 | -0.1732  | 0.007033331 |
| chr19 | 36650001 | 36750000 | 731  | 781  | 36700000 | -0.16782 | 0.008663377 |
| chr19 | 36700001 | 36800000 | 417  | 489  | 36750000 | -0.30216 | 1.01E-05    |
| chr19 | 36750001 | 36850000 | 331  | 373  | 36800000 | -0.24472 | 0.00026869  |
| chr19 | 37300001 | 37400000 | 896  | 778  | 37350000 | 0.131357 | 0.031455683 |
| chr19 | 37550001 | 37650000 | 859  | 729  | 37600000 | 0.164368 | 0.010055276 |
| chr19 | 38250001 | 38350000 | 710  | 758  | 38300000 | -0.16675 | 0.009025825 |
| chr19 | 38300001 | 38400000 | 761  | 876  | 38350000 | -0.27541 | 5.00E-05    |
| chr19 | 38400001 | 38500000 | 907  | 952  | 38450000 | -0.14223 | 0.021797816 |
| chr19 | 38450001 | 38550000 | 913  | 966  | 38500000 | -0.15378 | 0.014580898 |
| chr19 | 38650001 | 38750000 | 891  | 1060 | 38700000 | -0.32294 | 2.67E-06    |
| chr19 | 38700001 | 38800000 | 854  | 917  | 38750000 | -0.17506 | 0.006535566 |
| chr19 | 38750001 | 38850000 | 855  | 898  | 38800000 | -0.14316 | 0.021120212 |

|       |          |          |      |      |          |          |             |
|-------|----------|----------|------|------|----------|----------|-------------|
| chr19 | 38800001 | 38900000 | 905  | 1068 | 38850000 | -0.31129 | 5.68E-06    |
| chr19 | 38850001 | 38950000 | 932  | 1088 | 38900000 | -0.29565 | 1.51E-05    |
| chr19 | 38900001 | 39000000 | 935  | 995  | 38950000 | -0.1621  | 0.010755422 |
| chr19 | 39000001 | 39100000 | 872  | 911  | 39050000 | -0.13549 | 0.027263036 |
| chr19 | 39150001 | 39250000 | 949  | 994  | 39200000 | -0.13921 | 0.024122237 |
| chr19 | 39200001 | 39300000 | 759  | 858  | 39250000 | -0.24925 | 0.000211842 |
| chr19 | 39300001 | 39400000 | 844  | 872  | 39350000 | -0.11946 | 0.044988552 |
| chr19 | 39350001 | 39450000 | 818  | 956  | 39400000 | -0.29728 | 1.36E-05    |
| chr19 | 39400001 | 39500000 | 790  | 839  | 39450000 | -0.15919 | 0.01198055  |
| chr19 | 39600001 | 39700000 | 984  | 1093 | 39650000 | -0.22393 | 0.000762317 |
| chr19 | 39650001 | 39750000 | 841  | 971  | 39700000 | -0.27974 | 3.90E-05    |
| chr19 | 39850001 | 39950000 | 996  | 1073 | 39900000 | -0.1798  | 0.005404745 |
| chr19 | 39900001 | 40000000 | 942  | 1006 | 39950000 | -0.1672  | 0.00887128  |
| chr19 | 40250001 | 40350000 | 933  | 1007 | 40300000 | -0.18249 | 0.004845984 |
| chr19 | 40300001 | 40400000 | 684  | 754  | 40350000 | -0.21294 | 0.001282925 |
| chr19 | 40700001 | 40800000 | 1023 | 1083 | 40750000 | -0.1546  | 0.014158499 |
| chr19 | 40900001 | 41000000 | 849  | 883  | 40950000 | -0.12902 | 0.033551821 |
| chr19 | 41050001 | 41150000 | 935  | 1023 | 41100000 | -0.20214 | 0.002094738 |
| chr19 | 41100001 | 41200000 | 911  | 1016 | 41150000 | -0.22975 | 0.00057385  |
| chr19 | 41150001 | 41250000 | 912  | 1028 | 41200000 | -0.24511 | 0.000263287 |
| chr19 | 41200001 | 41300000 | 953  | 990  | 41250000 | -0.12732 | 0.035384689 |
| chr19 | 41400001 | 41500000 | 663  | 704  | 41450000 | -0.15894 | 0.012091885 |
| chr19 | 41450001 | 41550000 | 712  | 757  | 41500000 | -0.16079 | 0.011294053 |
| chr19 | 41650001 | 41750000 | 819  | 866  | 41700000 | -0.15288 | 0.015060258 |
| chr19 | 41700001 | 41800000 | 907  | 955  | 41750000 | -0.14677 | 0.018663544 |
| chr19 | 41800001 | 41900000 | 918  | 970  | 41850000 | -0.15186 | 0.015613009 |
| chr19 | 41850001 | 41950000 | 899  | 953  | 41900000 | -0.15653 | 0.013205382 |
| chr19 | 41900001 | 42000000 | 865  | 942  | 41950000 | -0.1954  | 0.002814751 |
| chr19 | 41950001 | 42050000 | 835  | 956  | 4.20E+07 | -0.26761 | 7.79E-05    |
| chr19 | 42100001 | 42200000 | 939  | 1011 | 42150000 | -0.17896 | 0.005592636 |
| chr19 | 42150001 | 42250000 | 918  | 1000 | 42200000 | -0.19581 | 0.002765621 |
| chr19 | 42200001 | 42300000 | 859  | 914  | 42250000 | -0.16191 | 0.010833553 |
| chr19 | 42350001 | 42450000 | 1085 | 1243 | 42400000 | -0.2685  | 7.41E-05    |
| chr19 | 42400001 | 42500000 | 1058 | 1232 | 42450000 | -0.29203 | 1.88E-05    |
| chr19 | 42450001 | 42550000 | 981  | 1018 | 42500000 | -0.12578 | 0.037118676 |
| chr19 | 42500001 | 42600000 | 1039 | 1104 | 42550000 | -0.15992 | 0.011664115 |
| chr19 | 42550001 | 42650000 | 1061 | 1156 | 42600000 | -0.19609 | 0.002731943 |
| chr19 | 42600001 | 42700000 | 1072 | 1156 | 42650000 | -0.18121 | 0.005105475 |
| chr19 | 42650001 | 42750000 | 1049 | 1118 | 42700000 | -0.16428 | 0.009912983 |
| chr19 | 42700001 | 42800000 | 1006 | 1081 | 42750000 | -0.17611 | 0.006268628 |
| chr19 | 42750001 | 42850000 | 1042 | 1092 | 42800000 | -0.13999 | 0.023503147 |
| chr19 | 42800001 | 42900000 | 1031 | 1082 | 42850000 | -0.14203 | 0.021947716 |
| chr19 | 42850001 | 42950000 | 969  | 1063 | 42900000 | -0.20594 | 0.001766623 |
| chr19 | 42900001 | 43000000 | 887  | 939  | 42950000 | -0.15456 | 0.014176869 |
| chr19 | 42950001 | 43050000 | 828  | 860  | 4.30E+07 | -0.12708 | 0.035657625 |
| chr19 | 43250001 | 43350000 | 165  | 174  | 43300000 | -0.14899 | 0.017274353 |
| chr19 | 43300001 | 43400000 | 189  | 204  | 43350000 | -0.18255 | 0.004832472 |



|       |          |          |      |      |          |          |             |
|-------|----------|----------|------|------|----------|----------|-------------|
| chr19 | 43350001 | 43450000 | 229  | 288  | 43400000 | -0.40309 | 7.93E-09    |
| chr19 | 43400001 | 43500000 | 233  | 266  | 43450000 | -0.26347 | 9.82E-05    |
| chr19 | 43650001 | 43750000 | 158  | 166  | 43700000 | -0.14363 | 0.02078699  |
| chr19 | 43700001 | 43800000 | 135  | 150  | 43750000 | -0.22437 | 0.000746269 |
| chr19 | 43950001 | 44050000 | 844  | 870  | 4.40E+07 | -0.11614 | 0.049616832 |
| chr19 | 44000001 | 44100000 | 899  | 934  | 44050000 | -0.12747 | 0.035220355 |
| chr19 | 44100001 | 44200000 | 1024 | 1061 | 44150000 | -0.12358 | 0.039720647 |
| chr19 | 44200001 | 44300000 | 976  | 1015 | 44250000 | -0.1289  | 0.033681177 |
| chr19 | 44750001 | 44850000 | 997  | 854  | 44800000 | 0.150986 | 0.016331894 |
| chr19 | 44850001 | 44950000 | 634  | 661  | 44900000 | -0.13254 | 0.029999789 |
| chr19 | 44900001 | 45000000 | 757  | 828  | 44950000 | -0.20171 | 0.002135146 |
| chr19 | 44950001 | 45050000 | 890  | 985  | 4.50E+07 | -0.21869 | 0.000979812 |
| chr19 | 45000001 | 45100000 | 964  | 1002 | 45050000 | -0.12815 | 0.034483226 |
| chr19 | 45200001 | 45300000 | 901  | 945  | 45250000 | -0.14116 | 0.022599725 |
| chr19 | 45250001 | 45350000 | 847  | 887  | 45300000 | -0.13894 | 0.02433623  |
| chr19 | 45400001 | 45500000 | 793  | 853  | 45450000 | -0.1776  | 0.005906951 |
| chr19 | 45450001 | 45550000 | 832  | 903  | 45500000 | -0.19051 | 0.003469058 |
| chr19 | 45500001 | 45600000 | 827  | 878  | 45550000 | -0.15871 | 0.012195767 |
| chr19 | 45550001 | 45650000 | 974  | 1100 | 45600000 | -0.24788 | 0.000227684 |
| chr19 | 45600001 | 45700000 | 990  | 1079 | 45650000 | -0.19657 | 0.002675897 |
| chr19 | 45700001 | 45800000 | 843  | 882  | 45750000 | -0.13762 | 0.025428594 |
| chr19 | 45750001 | 45850000 | 892  | 925  | 45800000 | -0.12478 | 0.038285004 |
| chr19 | 45800001 | 45900000 | 846  | 942  | 45850000 | -0.22744 | 0.000642795 |
| chr19 | 45850001 | 45950000 | 813  | 948  | 45900000 | -0.294   | 1.67E-05    |
| chr19 | 46050001 | 46150000 | 873  | 922  | 46100000 | -0.15116 | 0.016008207 |
| chr19 | 46100001 | 46200000 | 851  | 900  | 46150000 | -0.15314 | 0.01491991  |
| chr19 | 46200001 | 46300000 | 926  | 988  | 46250000 | -0.16587 | 0.009333137 |
| chr19 | 46250001 | 46350000 | 965  | 1043 | 46300000 | -0.18451 | 0.004459213 |
| chr19 | 46300001 | 46400000 | 909  | 937  | 46350000 | -0.11614 | 0.049622132 |
| chr19 | 46400001 | 46500000 | 927  | 1009 | 46450000 | -0.19466 | 0.002906352 |
| chr19 | 46450001 | 46550000 | 922  | 1038 | 46500000 | -0.24334 | 0.000288593 |
| chr19 | 46650001 | 46750000 | 877  | 914  | 46700000 | -0.13199 | 0.030533593 |
| chr19 | 47100001 | 47200000 | 933  | 971  | 47150000 | -0.12997 | 0.032564998 |
| chr19 | 47200001 | 47300000 | 970  | 1010 | 47250000 | -0.13067 | 0.031845359 |
| chr19 | 47450001 | 47550000 | 907  | 959  | 47500000 | -0.1528  | 0.015100764 |
| chr19 | 47500001 | 47600000 | 787  | 891  | 47550000 | -0.25143 | 0.000188673 |
| chr19 | 47550001 | 47650000 | 800  | 847  | 47600000 | -0.15473 | 0.014089943 |
| chr19 | 47650001 | 47750000 | 858  | 890  | 47700000 | -0.1252  | 0.037795243 |
| chr19 | 47700001 | 47800000 | 829  | 872  | 47750000 | -0.14533 | 0.019614812 |
| chr19 | 47850001 | 47950000 | 869  | 948  | 47900000 | -0.1979  | 0.002524585 |
| chr19 | 47900001 | 48000000 | 1009 | 1128 | 47950000 | -0.23321 | 0.00048315  |
| chr19 | 48150001 | 48250000 | 901  | 940  | 48200000 | -0.13351 | 0.029080991 |
| chr19 | 48200001 | 48300000 | 825  | 911  | 48250000 | -0.21543 | 0.00114249  |
| chr19 | 48250001 | 48350000 | 760  | 830  | 48300000 | -0.19948 | 0.00235562  |
| chr19 | 48300001 | 48400000 | 693  | 742  | 48350000 | -0.17094 | 0.007682756 |
| chr19 | 48350001 | 48450000 | 403  | 422  | 48400000 | -0.13883 | 0.024424482 |
| chr19 | 48400001 | 48500000 | 353  | 368  | 48450000 | -0.13241 | 0.030125085 |

|       |          |          |      |      |          |          |             |
|-------|----------|----------|------|------|----------|----------|-------------|
| chr19 | 48550001 | 48650000 | 837  | 948  | 48600000 | -0.25203 | 0.000182759 |
| chr19 | 48600001 | 48700000 | 900  | 1008 | 48650000 | -0.23587 | 0.000422781 |
| chr19 | 48800001 | 48900000 | 874  | 954  | 48850000 | -0.19873 | 0.002435082 |
| chr19 | 48850001 | 48950000 | 874  | 932  | 48900000 | -0.16507 | 0.009621236 |
| chr19 | 48900001 | 49000000 | 928  | 1023 | 48950000 | -0.21298 | 0.001280474 |
| chr19 | 48950001 | 49050000 | 934  | 1043 | 4.90E+07 | -0.23162 | 0.000523157 |
| chr19 | 49000001 | 49100000 | 796  | 824  | 49050000 | -0.12225 | 0.041365575 |
| chr19 | 49050001 | 49150000 | 812  | 909  | 49100000 | -0.23517 | 0.00043792  |
| chr19 | 49100001 | 49200000 | 844  | 1013 | 49150000 | -0.33569 | 1.14E-06    |
| chr19 | 49150001 | 49250000 | 784  | 894  | 49200000 | -0.26179 | 0.000107668 |
| chr19 | 49200001 | 49300000 | 767  | 809  | 49250000 | -0.14928 | 0.017098729 |
| chr19 | 49450001 | 49550000 | 674  | 704  | 49500000 | -0.1352  | 0.027527445 |
| chr19 | 49500001 | 49600000 | 592  | 705  | 49550000 | -0.3244  | 2.43E-06    |
| chr19 | 49550001 | 49650000 | 828  | 924  | 49600000 | -0.23063 | 0.000549291 |
| chr19 | 49600001 | 49700000 | 927  | 1007 | 49650000 | -0.19179 | 0.003285516 |
| chr19 | 49650001 | 49750000 | 801  | 890  | 49700000 | -0.22437 | 0.000746269 |
| chr19 | 49800001 | 49900000 | 887  | 922  | 49850000 | -0.1282  | 0.034423614 |
| chr19 | 49850001 | 49950000 | 989  | 1104 | 49900000 | -0.23107 | 0.000537558 |
| chr19 | 49900001 | 50000000 | 975  | 1007 | 49950000 | -0.11896 | 0.045657915 |
| chr19 | 49950001 | 50050000 | 827  | 858  | 5.00E+07 | -0.12546 | 0.03749018  |
| chr19 | 50000001 | 50100000 | 846  | 879  | 50050000 | -0.12758 | 0.035106044 |
| chr19 | 50100001 | 50200000 | 967  | 1045 | 50150000 | -0.18429 | 0.004500466 |
| chr19 | 50150001 | 50250000 | 888  | 921  | 50200000 | -0.12501 | 0.038012765 |
| chr19 | 50200001 | 50300000 | 824  | 877  | 50250000 | -0.1623  | 0.010674508 |
| chr19 | 50250001 | 50350000 | 941  | 1070 | 50300000 | -0.25772 | 0.000134572 |
| chr19 | 50300001 | 50400000 | 1030 | 1137 | 50350000 | -0.21496 | 0.001167825 |
| chr19 | 50350001 | 50450000 | 939  | 1064 | 50400000 | -0.25267 | 0.000176604 |
| chr19 | 50400001 | 50500000 | 831  | 968  | 50450000 | -0.29253 | 1.82E-05    |
| chr19 | 50450001 | 50550000 | 911  | 974  | 50500000 | -0.16884 | 0.008330689 |
| chr19 | 50650001 | 50750000 | 884  | 937  | 50700000 | -0.15637 | 0.013278655 |
| chr19 | 50700001 | 50800000 | 886  | 977  | 50750000 | -0.21342 | 0.001254452 |
| chr19 | 50750001 | 50850000 | 979  | 1055 | 50800000 | -0.18023 | 0.005311515 |
| chr19 | 50800001 | 50900000 | 906  | 971  | 50850000 | -0.17233 | 0.007275616 |
| chr19 | 50850001 | 50950000 | 908  | 957  | 50900000 | -0.1482  | 0.017760403 |
| chr19 | 50900001 | 51000000 | 1022 | 1127 | 50950000 | -0.21346 | 0.001252096 |
| chr19 | 50950001 | 51050000 | 999  | 1102 | 5.10E+07 | -0.21394 | 0.001224728 |
| chr19 | 51000001 | 51100000 | 957  | 1087 | 51050000 | -0.25613 | 0.00014663  |
| chr19 | 51050001 | 51150000 | 834  | 944  | 51100000 | -0.25111 | 0.000191936 |
| chr19 | 51100001 | 51200000 | 895  | 1013 | 51150000 | -0.25105 | 0.000192599 |
| chr19 | 51150001 | 51250000 | 1065 | 1177 | 51200000 | -0.21663 | 0.001079749 |
| chr19 | 51300001 | 51400000 | 1039 | 1158 | 51350000 | -0.22881 | 0.000600994 |
| chr19 | 51350001 | 51450000 | 1013 | 1067 | 51400000 | -0.1473  | 0.018325364 |
| chr19 | 51400001 | 51500000 | 950  | 983  | 51450000 | -0.12164 | 0.042139089 |
| chr19 | 51450001 | 51550000 | 969  | 1024 | 51500000 | -0.15202 | 0.01552646  |
| chr19 | 51700001 | 51800000 | 1001 | 1041 | 51750000 | -0.1289  | 0.033679672 |
| chr19 | 51750001 | 51850000 | 1023 | 1072 | 51800000 | -0.13987 | 0.023596602 |
| chr19 | 51800001 | 51900000 | 975  | 1024 | 51850000 | -0.14311 | 0.021155698 |

|       |          |          |      |      |          |          |             |
|-------|----------|----------|------|------|----------|----------|-------------|
| chr19 | 51900001 | 52000000 | 870  | 897  | 51950000 | -0.11646 | 0.049153501 |
| chr19 | 51950001 | 52050000 | 979  | 1058 | 5.20E+07 | -0.18433 | 0.004492358 |
| chr19 | 52000001 | 52100000 | 1055 | 1090 | 52050000 | -0.11946 | 0.044988552 |
| chr19 | 52500001 | 52600000 | 853  | 887  | 52550000 | -0.12876 | 0.033828073 |
| chr19 | 52550001 | 52650000 | 868  | 940  | 52600000 | -0.18734 | 0.003965108 |
| chr19 | 52600001 | 52700000 | 889  | 958  | 52650000 | -0.18021 | 0.005315821 |
| chr19 | 52800001 | 52900000 | 823  | 861  | 52850000 | -0.13749 | 0.025533835 |
| chr19 | 52850001 | 52950000 | 826  | 874  | 52900000 | -0.15386 | 0.014537501 |
| chr19 | 53000001 | 53100000 | 627  | 541  | 53050000 | 0.140465 | 0.02339864  |
| chr19 | 53050001 | 53150000 | 709  | 589  | 53100000 | 0.195146 | 0.002927863 |
| chr19 | 54150001 | 54250000 | 793  | 665  | 54200000 | 0.181595 | 0.005144178 |
| chr19 | 54200001 | 54300000 | 749  | 613  | 54250000 | 0.216707 | 0.001117954 |
| chr19 | 54250001 | 54350000 | 645  | 554  | 54300000 | 0.147041 | 0.018730622 |
| chr19 | 54400001 | 54500000 | 828  | 913  | 54450000 | -0.21336 | 0.001258406 |
| chr19 | 54600001 | 54700000 | 992  | 1050 | 54650000 | -0.15435 | 0.014286232 |
| chr19 | 54650001 | 54750000 | 815  | 919  | 54700000 | -0.24564 | 0.000256106 |
| chr19 | 54700001 | 54800000 | 669  | 723  | 54750000 | -0.18436 | 0.004486696 |
| chr19 | 54900001 | 55000000 | 843  | 909  | 54950000 | -0.18112 | 0.005123961 |
| chr19 | 54950001 | 55050000 | 798  | 830  | 5.50E+07 | -0.12909 | 0.033474003 |
| chr19 | 55050001 | 55150000 | 762  | 811  | 55100000 | -0.16228 | 0.010683115 |
| chr19 | 55550001 | 55650000 | 864  | 915  | 55600000 | -0.15511 | 0.013899098 |
| chr19 | 55700001 | 55800000 | 1004 | 1049 | 55750000 | -0.13563 | 0.027145408 |
| chr19 | 55750001 | 55850000 | 918  | 987  | 55800000 | -0.17693 | 0.006067114 |
| chr19 | 55800001 | 55900000 | 906  | 988  | 55850000 | -0.19737 | 0.002583739 |
| chr19 | 55850001 | 55950000 | 978  | 1065 | 55900000 | -0.19532 | 0.002824484 |
| chr19 | 55900001 | 56000000 | 919  | 1076 | 55950000 | -0.29991 | 1.16E-05    |
| chr19 | 55950001 | 56050000 | 983  | 1142 | 5.60E+07 | -0.28867 | 2.30E-05    |
| chr19 | 56000001 | 56100000 | 961  | 1038 | 56050000 | -0.18357 | 0.004635337 |
| chr19 | 56050001 | 56150000 | 969  | 1061 | 56100000 | -0.20323 | 0.001995656 |
| chr19 | 56100001 | 56200000 | 1033 | 1172 | 56150000 | -0.2545  | 0.00016009  |
| chr19 | 56150001 | 56250000 | 984  | 1110 | 56200000 | -0.2462  | 0.000248661 |
| chr19 | 56300001 | 56400000 | 839  | 884  | 56350000 | -0.14775 | 0.018041467 |
| chr19 | 56400001 | 56500000 | 958  | 833  | 56450000 | 0.129337 | 0.033523903 |
| chr19 | 56450001 | 56550000 | 869  | 751  | 56500000 | 0.138171 | 0.025242571 |
| chr19 | 56950001 | 57050000 | 1043 | 879  | 5.70E+07 | 0.174432 | 0.006840098 |
| chr19 | 57000001 | 57100000 | 1027 | 873  | 57050000 | 0.162011 | 0.010976642 |
| chr19 | 58250001 | 58350000 | 757  | 640  | 58300000 | 0.16985  | 0.00816961  |
| chr19 | 58300001 | 58400000 | 575  | 496  | 58350000 | 0.14085  | 0.023100559 |
| chr19 | 58550001 | 58650000 | 878  | 925  | 58600000 | -0.1476  | 0.018131446 |
| chr19 | 58750001 | 58850000 | 858  | 913  | 58800000 | -0.16201 | 0.01079277  |
| chr19 | 58800001 | 58900000 | 914  | 1007 | 58850000 | -0.21217 | 0.001329515 |
| chr19 | 58850001 | 58950000 | 884  | 962  | 58900000 | -0.19436 | 0.002943437 |
| chr19 | 59050001 | 59150000 | 465  | 518  | 59100000 | -0.22809 | 0.00062258  |
| chr19 | 59100001 | 59200000 | 7    | 13   | 59150000 | -0.96546 | 4.15E-37    |
| chr8  | 1        | 100000   | 7    | 6    | 50000    | 0.150021 | 0.016892961 |
| chr8  | 50001    | 150000   | 2    | 1    | 1.00E+05 | 0.927628 | 7.06E-34    |
| chr8  | 100001   | 200000   | 234  | 279  | 150000   | -0.32613 | 2.16E-06    |

|      |         |         |      |      |          |          |             |
|------|---------|---------|------|------|----------|----------|-------------|
| chr8 | 150001  | 250000  | 655  | 752  | 2.00E+05 | -0.27161 | 6.22E-05    |
| chr8 | 200001  | 300000  | 697  | 745  | 250000   | -0.16845 | 0.008456253 |
| chr8 | 250001  | 350000  | 596  | 644  | 3.00E+05 | -0.18412 | 0.004531521 |
| chr8 | 300001  | 400000  | 416  | 479  | 350000   | -0.27581 | 4.89E-05    |
| chr8 | 550001  | 650000  | 947  | 998  | 6.00E+05 | -0.14805 | 0.01785422  |
| chr8 | 600001  | 700000  | 983  | 1069 | 650000   | -0.19337 | 0.003071565 |
| chr8 | 850001  | 950000  | 915  | 1015 | 9.00E+05 | -0.22201 | 0.000836443 |
| chr8 | 900001  | 1000000 | 829  | 942  | 950000   | -0.25673 | 0.000141992 |
| chr8 | 950001  | 1050000 | 968  | 1013 | 1.00E+06 | -0.13793 | 0.025170284 |
| chr8 | 1200001 | 1300000 | 976  | 1016 | 1250000  | -0.13032 | 0.032202574 |
| chr8 | 1450001 | 1550000 | 961  | 1001 | 1500000  | -0.13121 | 0.031307648 |
| chr8 | 1500001 | 1600000 | 846  | 894  | 1550000  | -0.15199 | 0.015543    |
| chr8 | 1700001 | 1800000 | 959  | 1060 | 1750000  | -0.21683 | 0.001069606 |
| chr8 | 1750001 | 1850000 | 1016 | 1121 | 1800000  | -0.21426 | 0.001206712 |
| chr8 | 1800001 | 1900000 | 1046 | 1140 | 1850000  | -0.19652 | 0.002680953 |
| chr8 | 1950001 | 2050000 | 1006 | 1048 | 2.00E+06 | -0.13138 | 0.031133627 |
| chr8 | 2600001 | 2700000 | 1077 | 930  | 2650000  | 0.139344 | 0.024285326 |
| chr8 | 2650001 | 2750000 | 1006 | 862  | 2700000  | 0.150499 | 0.01661295  |
| chr8 | 2950001 | 3050000 | 987  | 1020 | 3.00E+06 | -0.11982 | 0.044504594 |
| chr8 | 4450001 | 4550000 | 1007 | 869  | 4500000  | 0.140264 | 0.023555748 |
| chr8 | 4950001 | 5050000 | 913  | 952  | 5.00E+06 | -0.13272 | 0.029827506 |
| chr8 | 5250001 | 5350000 | 957  | 831  | 5300000  | 0.131299 | 0.031513702 |
| chr8 | 5300001 | 5400000 | 1030 | 891  | 5350000  | 0.136775 | 0.026423846 |
| chr8 | 6150001 | 6250000 | 847  | 734  | 6200000  | 0.13421  | 0.028714851 |
| chr8 | 6850001 | 6950000 | 564  | 604  | 6900000  | -0.17123 | 0.007596718 |
| chr8 | 6900001 | 7000000 | 388  | 439  | 6950000  | -0.25054 | 0.000197891 |
| chr8 | 6950001 | 7050000 | 67   | 83   | 7.00E+06 | -0.38132 | 4.29E-08    |
| chr8 | 7000001 | 7100000 | 24   | 25   | 7050000  | -0.13127 | 0.031247765 |
| chr8 | 7050001 | 7150000 | 1    | 2    | 7100000  | -1.07237 | 8.26E-44    |
| chr8 | 7100001 | 7200000 | 5    | 8    | 7150000  | -0.75044 | 1.48E-24    |
| chr8 | 7150001 | 7250000 | 36   | 41   | 7200000  | -0.26    | 0.000118816 |
| chr8 | 7200001 | 7300000 | 36   | 46   | 7250000  | -0.42601 | 1.24E-09    |
| chr8 | 7250001 | 7350000 | 17   | 25   | 7300000  | -0.62877 | 2.85E-18    |
| chr8 | 7350001 | 7450000 | 7    | 4    | 7400000  | 0.734983 | 3.27E-23    |
| chr8 | 7400001 | 7500000 | 3    | 1    | 7450000  | 1.512591 | 1.57E-69    |
| chr8 | 7450001 | 7550000 | 3    | 1    | 7500000  | 1.512591 | 1.57E-69    |
| chr8 | 7550001 | 7650000 | 2    | 3    | 7600000  | -0.65733 | 1.11E-19    |
| chr8 | 7600001 | 7700000 | 8    | 5    | 7650000  | 0.6057   | 7.32E-17    |
| chr8 | 7700001 | 7800000 | 18   | 15   | 7750000  | 0.190663 | 0.003540577 |
| chr8 | 7750001 | 7850000 | 13   | 7    | 7800000  | 0.820713 | 8.26E-28    |
| chr8 | 7800001 | 7900000 | 1    | 3    | 7850000  | -1.65733 | 2.87E-81    |
| chr8 | 7850001 | 7950000 | 0    | 3    | 7900000  | #NAME?   | 1.59E-189   |
| chr8 | 7900001 | 8000000 | 2    | 3    | 7950000  | -0.65733 | 1.11E-19    |
| chr8 | 7950001 | 8050000 | 5    | 2    | 8.00E+06 | 1.249556 | 2.09E-53    |
| chr8 | 8000001 | 8100000 | 36   | 40   | 8050000  | -0.22437 | 0.000746269 |
| chr8 | 8100001 | 8200000 | 983  | 1019 | 8150000  | -0.12426 | 0.038900172 |
| chr8 | 9500001 | 9600000 | 979  | 859  | 9550000  | 0.116279 | 0.049762085 |

|      |          |          |      |      |          |          |             |
|------|----------|----------|------|------|----------|----------|-------------|
| chr8 | 10350001 | 10450000 | 941  | 979  | 10400000 | -0.12949 | 0.033063107 |
| chr8 | 10400001 | 10500000 | 1002 | 1092 | 10450000 | -0.19646 | 0.00268802  |
| chr8 | 10450001 | 10550000 | 1087 | 1188 | 10500000 | -0.20055 | 0.002247066 |
| chr8 | 10500001 | 10600000 | 1116 | 1220 | 10550000 | -0.20092 | 0.00221149  |
| chr8 | 10550001 | 10650000 | 1065 | 1117 | 10600000 | -0.14115 | 0.022608439 |
| chr8 | 10700001 | 10800000 | 1099 | 1145 | 10750000 | -0.13153 | 0.03098709  |
| chr8 | 10750001 | 10850000 | 1024 | 1115 | 10800000 | -0.1952  | 0.00283905  |
| chr8 | 10800001 | 10900000 | 1015 | 1092 | 10850000 | -0.17786 | 0.005843787 |
| chr8 | 10850001 | 10950000 | 1058 | 1122 | 10900000 | -0.1571  | 0.012930718 |
| chr8 | 11000001 | 11100000 | 1040 | 1075 | 11050000 | -0.12012 | 0.044098859 |
| chr8 | 11050001 | 11150000 | 976  | 1013 | 11100000 | -0.12605 | 0.036811283 |
| chr8 | 11200001 | 11300000 | 950  | 982  | 11250000 | -0.12017 | 0.044042897 |
| chr8 | 11250001 | 11350000 | 999  | 1075 | 11300000 | -0.17815 | 0.005776887 |
| chr8 | 11300001 | 11400000 | 1071 | 1151 | 11350000 | -0.1763  | 0.006220621 |
| chr8 | 11350001 | 11450000 | 1077 | 1114 | 11400000 | -0.1211  | 0.042822169 |
| chr8 | 11400001 | 11500000 | 1042 | 1100 | 11450000 | -0.15052 | 0.016372302 |
| chr8 | 11850001 | 11950000 | 157  | 170  | 11900000 | -0.18714 | 0.003997625 |
| chr8 | 12000001 | 12100000 | 20   | 15   | 12050000 | 0.342666 | 8.12E-07    |
| chr8 | 12050001 | 12150000 | 11   | 8    | 12100000 | 0.38706  | 3.38E-08    |
| chr8 | 12100001 | 12200000 | 3    | 2    | 12150000 | 0.512591 | 8.10E-13    |
| chr8 | 12200001 | 12300000 | 65   | 68   | 12250000 | -0.13747 | 0.025555546 |
| chr8 | 12250001 | 12350000 | 6    | 12   | 12300000 | -1.07237 | 8.26E-44    |
| chr8 | 12300001 | 12400000 | 25   | 16   | 12350000 | 0.571484 | 2.55E-15    |
| chr8 | 12350001 | 12450000 | 200  | 158  | 12400000 | 0.267704 | 8.31E-05    |
| chr8 | 12400001 | 12500000 | 225  | 197  | 12450000 | 0.119358 | 0.045455803 |
| chr8 | 12450001 | 12550000 | 122  | 134  | 12500000 | -0.20772 | 0.001629941 |
| chr8 | 12750001 | 12850000 | 944  | 981  | 12800000 | -0.12784 | 0.034820941 |
| chr8 | 13050001 | 13150000 | 1059 | 926  | 13100000 | 0.121247 | 0.042965791 |
| chr8 | 13200001 | 13300000 | 990  | 846  | 13250000 | 0.154399 | 0.014473956 |
| chr8 | 13350001 | 13450000 | 1052 | 917  | 13400000 | 0.125769 | 0.037452352 |
| chr8 | 13400001 | 13500000 | 1077 | 906  | 13450000 | 0.177064 | 0.006166717 |
| chr8 | 13450001 | 13550000 | 994  | 846  | 13500000 | 0.160216 | 0.011726812 |
| chr8 | 13800001 | 13900000 | 1041 | 863  | 13850000 | 0.198166 | 0.00257107  |
| chr8 | 13850001 | 13950000 | 988  | 849  | 13900000 | 0.146375 | 0.019164469 |
| chr8 | 14400001 | 14500000 | 986  | 821  | 14450000 | 0.191834 | 0.003370294 |
| chr8 | 14450001 | 14550000 | 1042 | 890  | 14500000 | 0.155106 | 0.014112745 |
| chr8 | 14650001 | 14750000 | 971  | 845  | 14700000 | 0.128148 | 0.034793557 |
| chr8 | 14750001 | 14850000 | 1023 | 895  | 14800000 | 0.120475 | 0.043969561 |
| chr8 | 14800001 | 14900000 | 1031 | 886  | 14850000 | 0.146294 | 0.0192176   |
| chr8 | 14950001 | 15050000 | 1069 | 906  | 1.50E+07 | 0.166307 | 0.009348523 |
| chr8 | 15000001 | 15100000 | 1041 | 880  | 15050000 | 0.170023 | 0.008115477 |
| chr8 | 15550001 | 15650000 | 1048 | 908  | 15600000 | 0.134503 | 0.028445404 |
| chr8 | 15900001 | 16000000 | 991  | 869  | 15950000 | 0.117157 | 0.048501713 |
| chr8 | 15950001 | 16050000 | 1004 | 862  | 1.60E+07 | 0.147628 | 0.018356045 |
| chr8 | 16000001 | 16100000 | 1002 | 842  | 16050000 | 0.178619 | 0.005797051 |
| chr8 | 16050001 | 16150000 | 984  | 854  | 16100000 | 0.13205  | 0.030770146 |
| chr8 | 16100001 | 16200000 | 985  | 843  | 16150000 | 0.152219 | 0.015638019 |

|      |          |          |      |      |          |          |             |
|------|----------|----------|------|------|----------|----------|-------------|
| chr8 | 16150001 | 16250000 | 975  | 850  | 16200000 | 0.125568 | 0.037685231 |
| chr8 | 16400001 | 16500000 | 1050 | 888  | 16450000 | 0.169386 | 0.008316054 |
| chr8 | 16450001 | 16550000 | 1026 | 822  | 16500000 | 0.247449 | 0.000246264 |
| chr8 | 16650001 | 16750000 | 959  | 841  | 16700000 | 0.117053 | 0.048649438 |
| chr8 | 16700001 | 16800000 | 988  | 847  | 16750000 | 0.149777 | 0.01703703  |
| chr8 | 16750001 | 16850000 | 940  | 805  | 16800000 | 0.1513   | 0.016152514 |
| chr8 | 17200001 | 17300000 | 983  | 1024 | 17250000 | -0.13132 | 0.031189317 |
| chr8 | 17850001 | 17950000 | 905  | 956  | 17900000 | -0.15146 | 0.015834781 |
| chr8 | 17950001 | 18050000 | 935  | 970  | 1.80E+07 | -0.12539 | 0.037573537 |
| chr8 | 18000001 | 18100000 | 956  | 1012 | 18050000 | -0.1545  | 0.014209684 |
| chr8 | 18050001 | 18150000 | 984  | 1041 | 18100000 | -0.15361 | 0.014669153 |
| chr8 | 18900001 | 19000000 | 926  | 961  | 18950000 | -0.1259  | 0.036990569 |
| chr8 | 19950001 | 20050000 | 971  | 1006 | 2.00E+07 | -0.12346 | 0.039868742 |
| chr8 | 20000001 | 20100000 | 990  | 1027 | 20050000 | -0.12531 | 0.037669475 |
| chr8 | 20050001 | 20150000 | 1003 | 1076 | 20100000 | -0.17373 | 0.006887715 |
| chr8 | 20100001 | 20200000 | 1016 | 1072 | 20150000 | -0.14978 | 0.016806486 |
| chr8 | 21150001 | 21250000 | 986  | 1081 | 21200000 | -0.20508 | 0.001836885 |
| chr8 | 21200001 | 21300000 | 1015 | 1063 | 21250000 | -0.13903 | 0.024263761 |
| chr8 | 21350001 | 21450000 | 1073 | 1114 | 21400000 | -0.12647 | 0.036337029 |
| chr8 | 21550001 | 21650000 | 1112 | 1207 | 21600000 | -0.19064 | 0.003450526 |
| chr8 | 21600001 | 21700000 | 979  | 1108 | 21650000 | -0.25095 | 0.000193599 |
| chr8 | 21650001 | 21750000 | 877  | 975  | 21700000 | -0.2252  | 0.000717106 |
| chr8 | 21700001 | 21800000 | 968  | 1006 | 21750000 | -0.12792 | 0.034728341 |
| chr8 | 21850001 | 21950000 | 1008 | 1079 | 21900000 | -0.17057 | 0.007792318 |
| chr8 | 21900001 | 22000000 | 1063 | 1196 | 21950000 | -0.24245 | 0.000302216 |
| chr8 | 21950001 | 22050000 | 1082 | 1237 | 2.20E+07 | -0.26552 | 8.76E-05    |
| chr8 | 22000001 | 22100000 | 1016 | 1188 | 22050000 | -0.29801 | 1.31E-05    |
| chr8 | 22050001 | 22150000 | 964  | 1018 | 22100000 | -0.151   | 0.016094803 |
| chr8 | 22300001 | 22400000 | 919  | 803  | 22350000 | 0.122293 | 0.041634898 |
| chr8 | 22400001 | 22500000 | 1123 | 1257 | 22450000 | -0.235   | 0.000441768 |
| chr8 | 22450001 | 22550000 | 1114 | 1278 | 22500000 | -0.27051 | 6.62E-05    |
| chr8 | 22500001 | 22600000 | 1093 | 1232 | 22550000 | -0.24508 | 0.000263639 |
| chr8 | 22550001 | 22650000 | 1116 | 1198 | 22600000 | -0.17466 | 0.006638453 |
| chr8 | 22600001 | 22700000 | 1103 | 1199 | 22650000 | -0.19277 | 0.003151439 |
| chr8 | 22650001 | 22750000 | 1054 | 1151 | 22700000 | -0.19938 | 0.002365886 |
| chr8 | 22750001 | 22850000 | 994  | 1037 | 22800000 | -0.13347 | 0.029114341 |
| chr8 | 22800001 | 22900000 | 964  | 1008 | 22850000 | -0.13676 | 0.026154864 |
| chr8 | 23300001 | 23400000 | 989  | 1023 | 23350000 | -0.12114 | 0.042779952 |
| chr8 | 23400001 | 23500000 | 988  | 1020 | 23450000 | -0.11836 | 0.046483656 |
| chr8 | 23550001 | 23650000 | 1030 | 1084 | 23600000 | -0.14609 | 0.019105591 |
| chr8 | 24000001 | 24100000 | 1050 | 912  | 24050000 | 0.130912 | 0.031902082 |
| chr8 | 24250001 | 24350000 | 1033 | 899  | 24300000 | 0.128075 | 0.034872466 |
| chr8 | 24300001 | 24400000 | 1016 | 862  | 24350000 | 0.164769 | 0.00990532  |
| chr8 | 24350001 | 24450000 | 986  | 862  | 24400000 | 0.121528 | 0.042604676 |
| chr8 | 25000001 | 25100000 | 922  | 801  | 25050000 | 0.130593 | 0.032225414 |
| chr8 | 25450001 | 25550000 | 894  | 923  | 25500000 | -0.11843 | 0.046387779 |
| chr8 | 26050001 | 26150000 | 949  | 828  | 26100000 | 0.124406 | 0.039050215 |

|      |          |          |      |      |          |          |             |
|------|----------|----------|------|------|----------|----------|-------------|
| chr8 | 26100001 | 26200000 | 1043 | 880  | 26150000 | 0.172792 | 0.007292165 |
| chr8 | 26250001 | 26350000 | 890  | 940  | 26300000 | -0.15123 | 0.015968431 |
| chr8 | 27300001 | 27400000 | 981  | 1012 | 27350000 | -0.11726 | 0.048022756 |
| chr8 | 27750001 | 27850000 | 1001 | 1103 | 27800000 | -0.21236 | 0.00131769  |
| chr8 | 28050001 | 28150000 | 911  | 947  | 28100000 | -0.12829 | 0.034336571 |
| chr8 | 28100001 | 28200000 | 948  | 984  | 28150000 | -0.12614 | 0.036708599 |
| chr8 | 28150001 | 28250000 | 1015 | 1066 | 28200000 | -0.1431  | 0.021165672 |
| chr8 | 28950001 | 29050000 | 1007 | 876  | 2.90E+07 | 0.128689 | 0.034211178 |
| chr8 | 29450001 | 29550000 | 1069 | 934  | 29500000 | 0.122396 | 0.04150632  |
| chr8 | 29900001 | 30000000 | 874  | 1009 | 29950000 | -0.27959 | 3.93E-05    |
| chr8 | 29950001 | 30050000 | 833  | 958  | 3.00E+07 | -0.27408 | 5.40E-05    |
| chr8 | 30400001 | 30500000 | 954  | 994  | 30450000 | -0.13163 | 0.030887901 |
| chr8 | 30700001 | 30800000 | 1022 | 863  | 30750000 | 0.171591 | 0.007639714 |
| chr8 | 30900001 | 31000000 | 953  | 830  | 30950000 | 0.126993 | 0.036064451 |
| chr8 | 32050001 | 32150000 | 1000 | 873  | 32100000 | 0.123575 | 0.040050748 |
| chr8 | 32500001 | 32600000 | 1054 | 894  | 32550000 | 0.165156 | 0.009762387 |
| chr8 | 32550001 | 32650000 | 1083 | 920  | 32600000 | 0.162956 | 0.010598746 |
| chr8 | 33050001 | 33150000 | 959  | 1017 | 33100000 | -0.15709 | 0.012938297 |
| chr8 | 33100001 | 33200000 | 908  | 940  | 33150000 | -0.12234 | 0.041249607 |
| chr8 | 33450001 | 33550000 | 802  | 884  | 33500000 | -0.21282 | 0.001290323 |
| chr8 | 33500001 | 33600000 | 847  | 910  | 33550000 | -0.17588 | 0.006326641 |
| chr8 | 34250001 | 34350000 | 984  | 852  | 34300000 | 0.135433 | 0.027602667 |
| chr8 | 34400001 | 34500000 | 1010 | 871  | 34450000 | 0.141239 | 0.022802762 |
| chr8 | 34650001 | 34750000 | 1073 | 917  | 34700000 | 0.154285 | 0.014533146 |
| chr8 | 34900001 | 35000000 | 1034 | 906  | 34950000 | 0.118281 | 0.04692553  |
| chr8 | 34950001 | 35050000 | 985  | 846  | 3.50E+07 | 0.147094 | 0.018696575 |
| chr8 | 35500001 | 35600000 | 1003 | 1046 | 35550000 | -0.13293 | 0.02962243  |
| chr8 | 36950001 | 37050000 | 1008 | 1048 | 3.70E+07 | -0.12851 | 0.03408988  |
| chr8 | 37600001 | 37700000 | 974  | 1009 | 37650000 | -0.1233  | 0.040057318 |
| chr8 | 37750001 | 37850000 | 876  | 906  | 37800000 | -0.12095 | 0.043017082 |
| chr8 | 38050001 | 38150000 | 866  | 751  | 38100000 | 0.133182 | 0.029678223 |
| chr8 | 38100001 | 38200000 | 944  | 820  | 38150000 | 0.130791 | 0.032024017 |
| chr8 | 38550001 | 38650000 | 987  | 1088 | 38600000 | -0.21293 | 0.001283617 |
| chr8 | 38600001 | 38700000 | 1021 | 1080 | 38650000 | -0.15342 | 0.014769972 |
| chr8 | 38750001 | 38850000 | 951  | 1021 | 38800000 | -0.17484 | 0.006592737 |
| chr8 | 39500001 | 39600000 | 1020 | 853  | 39550000 | 0.18558  | 0.004373052 |
| chr8 | 39550001 | 39650000 | 1071 | 926  | 39600000 | 0.137503 | 0.025802805 |
| chr8 | 39750001 | 39850000 | 912  | 765  | 39800000 | 0.181202 | 0.005226332 |
| chr8 | 40450001 | 40550000 | 955  | 831  | 40500000 | 0.12828  | 0.034650374 |
| chr8 | 40500001 | 40600000 | 1014 | 854  | 40550000 | 0.175378 | 0.006590947 |
| chr8 | 40850001 | 40950000 | 934  | 799  | 40900000 | 0.152855 | 0.015290348 |
| chr8 | 41100001 | 41200000 | 1066 | 1128 | 41150000 | -0.15393 | 0.014502034 |
| chr8 | 41400001 | 41500000 | 857  | 899  | 41450000 | -0.1414  | 0.022419016 |
| chr8 | 41500001 | 41600000 | 1070 | 1107 | 41550000 | -0.12142 | 0.04241933  |
| chr8 | 41550001 | 41650000 | 1028 | 1093 | 41600000 | -0.16082 | 0.01127854  |
| chr8 | 41600001 | 41700000 | 987  | 1065 | 41650000 | -0.1821  | 0.004922524 |
| chr8 | 41650001 | 41750000 | 989  | 1064 | 41700000 | -0.17783 | 0.005852558 |

|      |          |          |      |      |          |          |             |
|------|----------|----------|------|------|----------|----------|-------------|
| chr8 | 41700001 | 41800000 | 1064 | 1097 | 41750000 | -0.11644 | 0.04919274  |
| chr8 | 41850001 | 41950000 | 967  | 832  | 41900000 | 0.144561 | 0.020388629 |
| chr8 | 41900001 | 42000000 | 937  | 820  | 41950000 | 0.120053 | 0.044525506 |
| chr8 | 42050001 | 42150000 | 848  | 880  | 42100000 | -0.12581 | 0.037087981 |
| chr8 | 42900001 | 43000000 | 821  | 885  | 42950000 | -0.18067 | 0.005219044 |
| chr8 | 42950001 | 43050000 | 766  | 793  | 4.30E+07 | -0.12235 | 0.041239578 |
| chr8 | 43100001 | 43200000 | 776  | 651  | 43150000 | 0.181027 | 0.005263335 |
| chr8 | 43150001 | 43250000 | 667  | 584  | 43200000 | 0.119347 | 0.045470608 |
| chr8 | 43500001 | 43600000 | 897  | 772  | 43550000 | 0.144135 | 0.020685001 |
| chr8 | 43550001 | 43650000 | 943  | 791  | 43600000 | 0.181208 | 0.005225067 |
| chr8 | 43800001 | 43900000 | 96   | 119  | 43850000 | -0.38223 | 4.00E-08    |
| chr8 | 46750001 | 46850000 | 32   | 27   | 46800000 | 0.172741 | 0.0073067   |
| chr8 | 46850001 | 46950000 | 683  | 710  | 46900000 | -0.12831 | 0.034314953 |
| chr8 | 46950001 | 47050000 | 995  | 1053 | 4.70E+07 | -0.15411 | 0.014410047 |
| chr8 | 47000001 | 47100000 | 1082 | 1227 | 47050000 | -0.25381 | 0.000166202 |
| chr8 | 47050001 | 47150000 | 1103 | 1246 | 47100000 | -0.24824 | 0.000223394 |
| chr8 | 47100001 | 47200000 | 1060 | 1189 | 47150000 | -0.23806 | 0.000378473 |
| chr8 | 47950001 | 48050000 | 769  | 637  | 4.80E+07 | 0.199318 | 0.002445619 |
| chr8 | 48000001 | 48100000 | 777  | 680  | 48050000 | 0.120008 | 0.044585585 |
| chr8 | 48450001 | 48550000 | 938  | 783  | 48500000 | 0.188204 | 0.003923579 |
| chr8 | 48500001 | 48600000 | 955  | 809  | 48550000 | 0.166989 | 0.009110539 |
| chr8 | 49100001 | 49200000 | 829  | 863  | 49150000 | -0.13036 | 0.032160602 |
| chr8 | 49150001 | 49250000 | 919  | 953  | 49200000 | -0.12478 | 0.038283005 |
| chr8 | 49300001 | 49400000 | 970  | 1002 | 49350000 | -0.1192  | 0.045337761 |
| chr8 | 49350001 | 49450000 | 983  | 1039 | 49400000 | -0.1523  | 0.015369856 |
| chr8 | 49600001 | 49700000 | 1065 | 1112 | 49650000 | -0.13468 | 0.02800017  |
| chr8 | 50150001 | 50250000 | 1046 | 869  | 50200000 | 0.195083 | 0.00293579  |
| chr8 | 50200001 | 50300000 | 1058 | 894  | 50250000 | 0.170621 | 0.007930968 |
| chr8 | 50300001 | 50400000 | 872  | 758  | 50350000 | 0.129759 | 0.033083568 |
| chr8 | 50350001 | 50450000 | 974  | 836  | 50400000 | 0.148047 | 0.018092088 |
| chr8 | 50400001 | 50500000 | 999  | 860  | 50450000 | 0.143776 | 0.020938144 |
| chr8 | 50500001 | 50600000 | 867  | 905  | 50550000 | -0.13426 | 0.028382086 |
| chr8 | 50650001 | 50750000 | 1068 | 880  | 50700000 | 0.206964 | 0.001744712 |
| chr8 | 50700001 | 50800000 | 1005 | 865  | 50750000 | 0.144052 | 0.020743749 |
| chr8 | 50850001 | 50950000 | 1037 | 885  | 50900000 | 0.156295 | 0.013523235 |
| chr8 | 50900001 | 51000000 | 1061 | 917  | 50950000 | 0.138059 | 0.025335868 |
| chr8 | 51150001 | 51250000 | 1043 | 906  | 51200000 | 0.130784 | 0.032030848 |
| chr8 | 51200001 | 51300000 | 1077 | 934  | 51250000 | 0.133152 | 0.029707049 |
| chr8 | 51400001 | 51500000 | 941  | 802  | 51450000 | 0.158221 | 0.012613208 |
| chr8 | 51450001 | 51550000 | 1070 | 870  | 51500000 | 0.226152 | 0.000714768 |
| chr8 | 51500001 | 51600000 | 1055 | 820  | 51550000 | 0.291175 | 2.16E-05    |
| chr8 | 51550001 | 51650000 | 946  | 791  | 51600000 | 0.185791 | 0.004335276 |
| chr8 | 51600001 | 51700000 | 878  | 765  | 51650000 | 0.126389 | 0.036743703 |
| chr8 | 51700001 | 51800000 | 997  | 863  | 51750000 | 0.135861 | 0.027222001 |
| chr8 | 51750001 | 51850000 | 983  | 828  | 51800000 | 0.175189 | 0.0066401   |
| chr8 | 51850001 | 51950000 | 948  | 798  | 51900000 | 0.176127 | 0.006399436 |
| chr8 | 51900001 | 52000000 | 969  | 827  | 51950000 | 0.156238 | 0.013551109 |



|      |          |          |      |      |          |          |             |
|------|----------|----------|------|------|----------|----------|-------------|
| chr8 | 52650001 | 52750000 | 946  | 824  | 52700000 | 0.126824 | 0.036253592 |
| chr8 | 53500001 | 53600000 | 1059 | 907  | 53550000 | 0.151156 | 0.016234334 |
| chr8 | 54400001 | 54500000 | 1024 | 1056 | 54450000 | -0.11677 | 0.048720327 |
| chr8 | 54550001 | 54650000 | 865  | 911  | 54600000 | -0.14712 | 0.018436955 |
| chr8 | 56350001 | 56450000 | 938  | 805  | 56400000 | 0.148227 | 0.017979592 |
| chr8 | 56400001 | 56500000 | 1019 | 862  | 56450000 | 0.169023 | 0.008432469 |
| chr8 | 56550001 | 56650000 | 833  | 730  | 56600000 | 0.118048 | 0.047249008 |
| chr8 | 56950001 | 57050000 | 933  | 790  | 5.70E+07 | 0.167653 | 0.008884215 |
| chr8 | 57200001 | 57300000 | 840  | 736  | 57250000 | 0.118312 | 0.046883588 |
| chr8 | 58400001 | 58500000 | 1032 | 872  | 58450000 | 0.170671 | 0.007915704 |
| chr8 | 60200001 | 60300000 | 986  | 859  | 60250000 | 0.126558 | 0.036553262 |
| chr8 | 60250001 | 60350000 | 1006 | 835  | 60300000 | 0.19641  | 0.002773363 |
| chr8 | 60300001 | 60400000 | 947  | 767  | 60350000 | 0.231766 | 0.000543867 |
| chr8 | 60350001 | 60450000 | 847  | 709  | 60400000 | 0.184205 | 0.004626579 |
| chr8 | 60400001 | 60500000 | 916  | 776  | 60450000 | 0.166919 | 0.009134743 |
| chr8 | 60450001 | 60550000 | 1043 | 865  | 60500000 | 0.197595 | 0.002635295 |
| chr8 | 61500001 | 61600000 | 957  | 991  | 61550000 | -0.12274 | 0.04075433  |
| chr8 | 61600001 | 61700000 | 1110 | 973  | 61650000 | 0.117676 | 0.047768824 |
| chr8 | 61750001 | 61850000 | 1010 | 1056 | 61800000 | -0.13663 | 0.026271955 |
| chr8 | 62750001 | 62850000 | 1045 | 906  | 62800000 | 0.133548 | 0.029332243 |
| chr8 | 62900001 | 63000000 | 949  | 829  | 62950000 | 0.122664 | 0.04117101  |
| chr8 | 62950001 | 63050000 | 1028 | 897  | 6.30E+07 | 0.124289 | 0.039189791 |
| chr8 | 63050001 | 63150000 | 971  | 846  | 63100000 | 0.126442 | 0.036684285 |
| chr8 | 63100001 | 63200000 | 983  | 790  | 63150000 | 0.242967 | 0.000310188 |
| chr8 | 63150001 | 63250000 | 925  | 783  | 63200000 | 0.168069 | 0.008744619 |
| chr8 | 63250001 | 63350000 | 1033 | 894  | 63300000 | 0.136122 | 0.026992437 |
| chr8 | 64050001 | 64150000 | 785  | 850  | 64100000 | -0.18714 | 0.003997625 |
| chr8 | 64500001 | 64600000 | 1070 | 935  | 64550000 | 0.122201 | 0.041750989 |
| chr8 | 64550001 | 64650000 | 1098 | 939  | 64600000 | 0.153309 | 0.015046273 |
| chr8 | 64850001 | 64950000 | 1127 | 954  | 64900000 | 0.168055 | 0.008749516 |
| chr8 | 64900001 | 65000000 | 1089 | 927  | 64950000 | 0.159991 | 0.011824163 |
| chr8 | 64950001 | 65050000 | 948  | 811  | 6.50E+07 | 0.152813 | 0.015313049 |
| chr8 | 65100001 | 65200000 | 1035 | 879  | 65150000 | 0.163324 | 0.010454584 |
| chr8 | 65300001 | 65400000 | 1039 | 901  | 65350000 | 0.133225 | 0.029637835 |
| chr8 | 66300001 | 66400000 | 993  | 865  | 66350000 | 0.126722 | 0.036368415 |
| chr8 | 66350001 | 66450000 | 1022 | 867  | 66400000 | 0.16492  | 0.009849528 |
| chr8 | 66750001 | 66850000 | 873  | 925  | 66800000 | -0.15584 | 0.013536661 |
| chr8 | 67150001 | 67250000 | 1032 | 903  | 67200000 | 0.120273 | 0.044234652 |
| chr8 | 67400001 | 67500000 | 993  | 864  | 67450000 | 0.128391 | 0.034531537 |
| chr8 | 67450001 | 67550000 | 907  | 781  | 67500000 | 0.143408 | 0.021200283 |
| chr8 | 67950001 | 68050000 | 985  | 826  | 6.80E+07 | 0.18161  | 0.005140974 |
| chr8 | 68200001 | 68300000 | 879  | 762  | 68250000 | 0.1337   | 0.029189329 |
| chr8 | 69000001 | 69100000 | 1060 | 903  | 69050000 | 0.158895 | 0.012307601 |
| chr8 | 69050001 | 69150000 | 1080 | 924  | 69100000 | 0.152695 | 0.015377453 |
| chr8 | 69300001 | 69400000 | 942  | 825  | 69350000 | 0.118961 | 0.045992842 |
| chr8 | 69350001 | 69450000 | 998  | 857  | 69400000 | 0.147373 | 0.018518089 |
| chr8 | 69550001 | 69650000 | 1049 | 917  | 69600000 | 0.121649 | 0.042449763 |

|      |          |          |      |     |          |          |             |
|------|----------|----------|------|-----|----------|----------|-------------|
| chr8 | 69650001 | 69750000 | 1040 | 905 | 69700000 | 0.128222 | 0.034713544 |
| chr8 | 69700001 | 69800000 | 1141 | 988 | 69750000 | 0.135344 | 0.027682406 |
| chr8 | 69850001 | 69950000 | 958  | 830 | 69900000 | 0.134543 | 0.028408913 |
| chr8 | 69900001 | 70000000 | 1058 | 863 | 69950000 | 0.221535 | 0.00089116  |
| chr8 | 69950001 | 70050000 | 983  | 859 | 7.00E+07 | 0.122162 | 0.0418004   |
| chr8 | 70150001 | 70250000 | 909  | 785 | 70200000 | 0.139216 | 0.02438832  |
| chr8 | 70450001 | 70550000 | 1085 | 946 | 70500000 | 0.125411 | 0.037866662 |
| chr8 | 70600001 | 70700000 | 1041 | 901 | 70650000 | 0.135999 | 0.027100121 |
| chr8 | 70650001 | 70750000 | 994  | 843 | 70700000 | 0.165341 | 0.009694756 |
| chr8 | 71850001 | 71950000 | 962  | 843 | 71900000 | 0.118132 | 0.047131961 |
| chr8 | 72250001 | 72350000 | 998  | 846 | 72300000 | 0.16601  | 0.009453744 |
| chr8 | 72900001 | 73000000 | 1078 | 856 | 72950000 | 0.260303 | 0.000124615 |
| chr8 | 72950001 | 73050000 | 1132 | 898 | 7.30E+07 | 0.261715 | 0.00011543  |
| chr8 | 73150001 | 73250000 | 820  | 884 | 73200000 | -0.18079 | 0.005192148 |
| chr8 | 73950001 | 74050000 | 1010 | 867 | 7.40E+07 | 0.14788  | 0.018197091 |
| chr8 | 74500001 | 74600000 | 1001 | 861 | 74550000 | 0.144985 | 0.020096392 |
| chr8 | 75400001 | 75500000 | 1025 | 868 | 75450000 | 0.167485 | 0.008940876 |
| chr8 | 75500001 | 75600000 | 989  | 844 | 75550000 | 0.156356 | 0.013493568 |
| chr8 | 75550001 | 75650000 | 1052 | 890 | 75600000 | 0.168886 | 0.008476659 |
| chr8 | 75800001 | 75900000 | 964  | 821 | 75850000 | 0.159279 | 0.012136108 |
| chr8 | 76050001 | 76150000 | 967  | 828 | 76100000 | 0.151513 | 0.016031921 |
| chr8 | 76150001 | 76250000 | 915  | 777 | 76200000 | 0.163485 | 0.010391918 |
| chr8 | 76350001 | 76450000 | 994  | 857 | 76400000 | 0.141579 | 0.022545049 |
| chr8 | 76400001 | 76500000 | 1032 | 900 | 76450000 | 0.125074 | 0.038259838 |
| chr8 | 76600001 | 76700000 | 1057 | 875 | 76650000 | 0.200249 | 0.002348454 |
| chr8 | 76650001 | 76750000 | 1025 | 882 | 76700000 | 0.144402 | 0.020499032 |
| chr8 | 76800001 | 76900000 | 1075 | 874 | 76850000 | 0.22626  | 0.000711058 |
| chr8 | 76850001 | 76950000 | 1136 | 903 | 76900000 | 0.258793 | 0.000135193 |
| chr8 | 76900001 | 77000000 | 1042 | 907 | 76950000 | 0.127809 | 0.035162808 |
| chr8 | 76950001 | 77050000 | 949  | 832 | 7.70E+07 | 0.117453 | 0.048083151 |
| chr8 | 77100001 | 77200000 | 1038 | 881 | 77150000 | 0.164221 | 0.010110624 |
| chr8 | 77350001 | 77450000 | 951  | 824 | 77400000 | 0.134429 | 0.028512897 |
| chr8 | 77400001 | 77500000 | 1035 | 900 | 77450000 | 0.129262 | 0.033603145 |
| chr8 | 77450001 | 77550000 | 1069 | 912 | 77500000 | 0.156784 | 0.013286667 |
| chr8 | 77500001 | 77600000 | 1074 | 936 | 77550000 | 0.126042 | 0.037139593 |
| chr8 | 77900001 | 78000000 | 933  | 811 | 77950000 | 0.129803 | 0.033036925 |
| chr8 | 78050001 | 78150000 | 1032 | 848 | 78100000 | 0.210935 | 0.001458182 |
| chr8 | 78100001 | 78200000 | 1026 | 860 | 78150000 | 0.18225  | 0.005009499 |
| chr8 | 78450001 | 78550000 | 1019 | 884 | 78500000 | 0.132664 | 0.030174197 |
| chr8 | 78500001 | 78600000 | 1034 | 825 | 78550000 | 0.253398 | 0.000180307 |
| chr8 | 78550001 | 78650000 | 1002 | 848 | 78600000 | 0.168375 | 0.00864356  |
| chr8 | 78600001 | 78700000 | 1050 | 904 | 78650000 | 0.143623 | 0.021047052 |
| chr8 | 78750001 | 78850000 | 955  | 831 | 78800000 | 0.12828  | 0.034650374 |
| chr8 | 78850001 | 78950000 | 926  | 768 | 78900000 | 0.197534 | 0.002642275 |
| chr8 | 78900001 | 79000000 | 1008 | 849 | 78950000 | 0.175287 | 0.006614438 |
| chr8 | 79100001 | 79200000 | 1007 | 859 | 79150000 | 0.156962 | 0.013201779 |
| chr8 | 79150001 | 79250000 | 1060 | 900 | 79200000 | 0.163696 | 0.010310817 |

|      |          |          |      |      |          |          |             |
|------|----------|----------|------|------|----------|----------|-------------|
| chr8 | 79450001 | 79550000 | 1111 | 918  | 79500000 | 0.202921 | 0.002088515 |
| chr8 | 79850001 | 79950000 | 1027 | 873  | 79900000 | 0.162011 | 0.010976642 |
| chr8 | 79900001 | 80000000 | 1095 | 904  | 79950000 | 0.204164 | 0.001976734 |
| chr8 | 80050001 | 80150000 | 957  | 833  | 80100000 | 0.127831 | 0.035139186 |
| chr8 | 80100001 | 80200000 | 1005 | 843  | 80150000 | 0.181219 | 0.005222773 |
| chr8 | 80150001 | 80250000 | 1044 | 886  | 80200000 | 0.164371 | 0.01005385  |
| chr8 | 80800001 | 80900000 | 973  | 850  | 80850000 | 0.122605 | 0.041244504 |
| chr8 | 80850001 | 80950000 | 949  | 792  | 80900000 | 0.188536 | 0.00386977  |
| chr8 | 81200001 | 81300000 | 854  | 705  | 81250000 | 0.204241 | 0.001970028 |
| chr8 | 81250001 | 81350000 | 831  | 709  | 81300000 | 0.156691 | 0.013331458 |
| chr8 | 81350001 | 81450000 | 958  | 836  | 81400000 | 0.124151 | 0.039354614 |
| chr8 | 81400001 | 81500000 | 1005 | 810  | 81450000 | 0.23883  | 0.000382649 |
| chr8 | 81750001 | 81850000 | 1004 | 1048 | 81800000 | -0.13425 | 0.028387928 |
| chr8 | 81800001 | 81900000 | 974  | 1037 | 81850000 | -0.16279 | 0.010480876 |
| chr8 | 82050001 | 82150000 | 947  | 825  | 82100000 | 0.126599 | 0.036507234 |
| chr8 | 82300001 | 82400000 | 990  | 842  | 82350000 | 0.161237 | 0.011295056 |
| chr8 | 82350001 | 82450000 | 1102 | 928  | 82400000 | 0.175556 | 0.006544999 |
| chr8 | 82400001 | 82500000 | 1030 | 883  | 82450000 | 0.149787 | 0.017031135 |
| chr8 | 83000001 | 83100000 | 976  | 835  | 83050000 | 0.152733 | 0.015356576 |
| chr8 | 83150001 | 83250000 | 1047 | 860  | 83200000 | 0.211481 | 0.001422338 |
| chr8 | 83200001 | 83300000 | 1027 | 859  | 83250000 | 0.185334 | 0.004417353 |
| chr8 | 83250001 | 83350000 | 1064 | 858  | 83300000 | 0.238077 | 0.000397428 |
| chr8 | 83300001 | 83400000 | 983  | 835  | 83350000 | 0.163043 | 0.010564237 |
| chr8 | 83550001 | 83650000 | 1069 | 908  | 83600000 | 0.163126 | 0.010531906 |
| chr8 | 83600001 | 83700000 | 1006 | 876  | 83650000 | 0.127256 | 0.03577216  |
| chr8 | 83850001 | 83950000 | 978  | 858  | 83900000 | 0.116485 | 0.049463965 |
| chr8 | 83900001 | 84000000 | 1038 | 906  | 83950000 | 0.123852 | 0.039714833 |
| chr8 | 84050001 | 84150000 | 958  | 838  | 84100000 | 0.120704 | 0.043670014 |
| chr8 | 84900001 | 85000000 | 988  | 800  | 84950000 | 0.232139 | 0.000533974 |
| chr8 | 84950001 | 85050000 | 1016 | 790  | 8.50E+07 | 0.290604 | 2.24E-05    |
| chr8 | 85000001 | 85100000 | 1060 | 904  | 85050000 | 0.157298 | 0.013042426 |
| chr8 | 85200001 | 85300000 | 1023 | 897  | 85250000 | 0.117254 | 0.048363548 |
| chr8 | 85300001 | 85400000 | 860  | 735  | 85350000 | 0.154221 | 0.014566357 |
| chr8 | 85350001 | 85450000 | 1014 | 850  | 85400000 | 0.182151 | 0.005029684 |
| chr8 | 85400001 | 85500000 | 1028 | 883  | 85450000 | 0.146983 | 0.018768198 |
| chr8 | 86700001 | 86800000 | 4    | 6    | 86750000 | -0.65733 | 1.11E-19    |
| chr8 | 86750001 | 86850000 | 120  | 92   | 86800000 | 0.310957 | 6.46E-06    |
| chr8 | 87150001 | 87250000 | 942  | 778  | 87200000 | 0.203585 | 0.002028114 |
| chr8 | 87200001 | 87300000 | 1014 | 860  | 87250000 | 0.165277 | 0.009718143 |
| chr8 | 87500001 | 87600000 | 1020 | 889  | 87550000 | 0.125942 | 0.037253811 |
| chr8 | 87550001 | 87650000 | 960  | 821  | 87600000 | 0.15328  | 0.015061662 |
| chr8 | 87600001 | 87700000 | 978  | 832  | 87650000 | 0.160879 | 0.011444701 |
| chr8 | 87650001 | 87750000 | 971  | 845  | 87700000 | 0.128148 | 0.034793557 |
| chr8 | 87950001 | 88050000 | 931  | 791  | 8.80E+07 | 0.162732 | 0.010687293 |
| chr8 | 88000001 | 88100000 | 1001 | 853  | 88050000 | 0.158453 | 0.012507332 |
| chr8 | 88100001 | 88200000 | 1011 | 870  | 88150000 | 0.144324 | 0.020553134 |
| chr8 | 88150001 | 88250000 | 1043 | 834  | 88200000 | 0.250248 | 0.000212829 |

|      |          |          |      |      |           |          |             |
|------|----------|----------|------|------|-----------|----------|-------------|
| chr8 | 88200001 | 88300000 | 945  | 777  | 88250000  | 0.210028 | 0.001519553 |
| chr8 | 88250001 | 88350000 | 813  | 710  | 88300000  | 0.123065 | 0.04067531  |
| chr8 | 88300001 | 88400000 | 777  | 679  | 88350000  | 0.122131 | 0.041838535 |
| chr8 | 88450001 | 88550000 | 1019 | 868  | 88500000  | 0.159015 | 0.012253535 |
| chr8 | 88550001 | 88650000 | 906  | 784  | 88600000  | 0.136286 | 0.026848894 |
| chr8 | 88600001 | 88700000 | 908  | 782  | 88650000  | 0.143152 | 0.021384497 |
| chr8 | 88750001 | 88850000 | 934  | 796  | 88800000  | 0.158282 | 0.012584986 |
| chr8 | 88800001 | 88900000 | 917  | 734  | 88850000  | 0.24877  | 0.000229914 |
| chr8 | 88850001 | 88950000 | 1024 | 849  | 88900000  | 0.198007 | 0.002588753 |
| chr8 | 88900001 | 89000000 | 1066 | 883  | 88950000  | 0.19935  | 0.002442231 |
| chr8 | 89150001 | 89250000 | 932  | 798  | 89200000  | 0.151569 | 0.016000318 |
| chr8 | 89200001 | 89300000 | 1025 | 894  | 89250000  | 0.124905 | 0.038458201 |
| chr8 | 89750001 | 89850000 | 1033 | 861  | 89800000  | 0.190383 | 0.003582318 |
| chr8 | 89800001 | 89900000 | 1013 | 822  | 89850000  | 0.229052 | 0.000621093 |
| chr8 | 89850001 | 89950000 | 971  | 813  | 89900000  | 0.183844 | 0.004695164 |
| chr8 | 89900001 | 90000000 | 1016 | 869  | 89950000  | 0.153101 | 0.01515805  |
| chr8 | 90050001 | 90150000 | 1061 | 928  | 90100000  | 0.120856 | 0.043471282 |
| chr8 | 90100001 | 90200000 | 984  | 794  | 90150000  | 0.237148 | 0.000416398 |
| chr8 | 90150001 | 90250000 | 883  | 756  | 90200000  | 0.151655 | 0.015951967 |
| chr8 | 90800001 | 90900000 | 992  | 836  | 90850000  | 0.174465 | 0.00683124  |
| chr8 | 91350001 | 91450000 | 774  | 825  | 91400000  | -0.16443 | 0.009855207 |
| chr8 | 92100001 | 92200000 | 987  | 844  | 92150000  | 0.153435 | 0.014979075 |
| chr8 | 92700001 | 92800000 | 959  | 839  | 92750000  | 0.120488 | 0.043951914 |
| chr8 | 92800001 | 92900000 | 845  | 873  | 92850000  | -0.1194  | 0.045062209 |
| chr8 | 92900001 | 93000000 | 932  | 800  | 92950000  | 0.147958 | 0.018147759 |
| chr8 | 93150001 | 93250000 | 926  | 787  | 93200000  | 0.162277 | 0.010869109 |
| chr8 | 93200001 | 93300000 | 898  | 764  | 93250000  | 0.160771 | 0.011490321 |
| chr8 | 94000001 | 94100000 | 1014 | 889  | 94050000  | 0.117431 | 0.04811452  |
| chr8 | 94200001 | 94300000 | 1002 | 874  | 94250000  | 0.124806 | 0.03857587  |
| chr8 | 94250001 | 94350000 | 1075 | 941  | 94300000  | 0.119698 | 0.044998371 |
| chr8 | 94400001 | 94500000 | 858  | 885  | 94450000  | -0.11707 | 0.048284314 |
| chr8 | 94450001 | 94550000 | 919  | 969  | 94500000  | -0.1488  | 0.0173892   |
| chr8 | 95100001 | 95200000 | 1059 | 906  | 95150000  | 0.152748 | 0.015348598 |
| chr8 | 95300001 | 95400000 | 885  | 931  | 95350000  | -0.14548 | 0.01951554  |
| chr8 | 95400001 | 95500000 | 977  | 836  | 95450000  | 0.152484 | 0.015492586 |
| chr8 | 97100001 | 97200000 | 973  | 1005 | 97150000  | -0.11906 | 0.045530024 |
| chr8 | 97150001 | 97250000 | 952  | 1030 | 97200000  | -0.18598 | 0.00419539  |
| chr8 | 97550001 | 97650000 | 1077 | 916  | 97600000  | 0.161227 | 0.011299031 |
| chr8 | 97600001 | 97700000 | 1100 | 924  | 97650000  | 0.179167 | 0.005671473 |
| chr8 | 97800001 | 97900000 | 1118 | 977  | 97850000  | 0.122118 | 0.041855309 |
| chr8 | 97950001 | 98050000 | 1000 | 855  | 9.80E+07  | 0.153632 | 0.014874824 |
| chr8 | 98000001 | 98100000 | 982  | 830  | 98050000  | 0.17024  | 0.008048103 |
| chr8 | 98250001 | 98350000 | 925  | 963  | 98300000  | -0.13045 | 0.032064823 |
| chr8 | 99450001 | 99550000 | 1031 | 903  | 99500000  | 0.118875 | 0.0461107   |
| chr8 | 99700001 | 99800000 | 864  | 752  | 99750000  | 0.127927 | 0.035034151 |
| chr8 | 1E+08    | 1E+08    | 838  | 694  | 100100000 | 0.199643 | 0.002411333 |
| chr8 | 1E+08    | 1E+08    | 1058 | 828  | 100250000 | 0.281265 | 3.86E-05    |

|      |          |          |      |      |           |          |             |
|------|----------|----------|------|------|-----------|----------|-------------|
| chr8 | 1E+08    | 1E+08    | 1010 | 758  | 100300000 | 0.341714 | 8.66E-07    |
| chr8 | 1E+08    | 1E+08    | 949  | 811  | 100350000 | 0.154334 | 0.014507393 |
| chr8 | 1E+08    | 1E+08    | 961  | 824  | 100400000 | 0.14952  | 0.017190312 |
| chr8 | 1.01E+08 | 1.01E+08 | 922  | 725  | 100600000 | 0.274414 | 5.71E-05    |
| chr8 | 1.01E+08 | 1.01E+08 | 991  | 849  | 100650000 | 0.150749 | 0.016468143 |
| chr8 | 1.01E+08 | 1.01E+08 | 1063 | 930  | 100850000 | 0.120467 | 0.043979514 |
| chr8 | 1.01E+08 | 1.01E+08 | 1046 | 916  | 100900000 | 0.119092 | 0.045815619 |
| chr8 | 1.01E+08 | 1.01E+08 | 905  | 766  | 100950000 | 0.168202 | 0.008700682 |
| chr8 | 1.01E+08 | 1.01E+08 | 831  | 729  | 1.01E+08  | 0.116558 | 0.049358933 |
| chr8 | 1.01E+08 | 1.02E+08 | 965  | 1034 | 101450000 | -0.17201 | 0.007368605 |
| chr8 | 1.01E+08 | 1.02E+08 | 1009 | 1076 | 101500000 | -0.16512 | 0.009601154 |
| chr8 | 1.02E+08 | 1.02E+08 | 958  | 1028 | 101550000 | -0.17411 | 0.006783697 |
| chr8 | 1.03E+08 | 1.03E+08 | 878  | 909  | 102700000 | -0.12243 | 0.041135974 |
| chr8 | 1.04E+08 | 1.04E+08 | 961  | 809  | 103950000 | 0.176025 | 0.00642513  |
| chr8 | 1.04E+08 | 1.04E+08 | 915  | 793  | 1.04E+08  | 0.134079 | 0.028836197 |
| chr8 | 1.05E+08 | 1.05E+08 | 895  | 784  | 104800000 | 0.118662 | 0.046401147 |
| chr8 | 1.05E+08 | 1.05E+08 | 1013 | 866  | 104850000 | 0.153823 | 0.014773839 |
| chr8 | 1.05E+08 | 1.05E+08 | 1042 | 882  | 105050000 | 0.168133 | 0.00872346  |
| chr8 | 1.05E+08 | 1.05E+08 | 1005 | 826  | 105100000 | 0.21061  | 0.001479904 |
| chr8 | 1.05E+08 | 1.05E+08 | 1001 | 838  | 105150000 | 0.184048 | 0.004656254 |
| chr8 | 1.06E+08 | 1.06E+08 | 1037 | 861  | 106250000 | 0.195959 | 0.002827667 |
| chr8 | 1.07E+08 | 1.07E+08 | 1021 | 859  | 106700000 | 0.176881 | 0.006211437 |
| chr8 | 1.07E+08 | 1.07E+08 | 1060 | 913  | 106750000 | 0.143006 | 0.021490172 |
| chr8 | 1.08E+08 | 1.08E+08 | 1026 | 884  | 107550000 | 0.142541 | 0.021829285 |
| chr8 | 1.08E+08 | 1.08E+08 | 992  | 844  | 107900000 | 0.160725 | 0.011509643 |
| chr8 | 1.08E+08 | 1.08E+08 | 1038 | 853  | 107950000 | 0.210817 | 0.001466035 |
| chr8 | 1.08E+08 | 1.09E+08 | 976  | 856  | 108450000 | 0.116899 | 0.048870079 |
| chr8 | 1.09E+08 | 1.09E+08 | 957  | 823  | 108650000 | 0.145255 | 0.019912595 |
| chr8 | 1.09E+08 | 1.09E+08 | 861  | 707  | 109100000 | 0.211931 | 0.0013934   |
| chr8 | 1.09E+08 | 1.09E+08 | 846  | 699  | 109150000 | 0.202993 | 0.002081847 |
| chr8 | 1.09E+08 | 1.09E+08 | 1060 | 927  | 109300000 | 0.121051 | 0.043218193 |
| chr8 | 1.09E+08 | 1.09E+08 | 961  | 814  | 109350000 | 0.167136 | 0.009060092 |
| chr8 | 1.1E+08  | 1.1E+08  | 1015 | 877  | 1.10E+08  | 0.138459 | 0.025004762 |
| chr8 | 1.1E+08  | 1.1E+08  | 1035 | 892  | 110050000 | 0.142143 | 0.022122583 |
| chr8 | 1.1E+08  | 1.1E+08  | 1030 | 900  | 110100000 | 0.122276 | 0.041656805 |
| chr8 | 1.1E+08  | 1.1E+08  | 1013 | 886  | 110150000 | 0.120884 | 0.043435369 |
| chr8 | 1.1E+08  | 1.1E+08  | 916  | 789  | 110350000 | 0.142951 | 0.02153019  |
| chr8 | 1.1E+08  | 1.1E+08  | 979  | 836  | 110400000 | 0.155434 | 0.013947933 |
| chr8 | 1.1E+08  | 1.11E+08 | 1058 | 887  | 110450000 | 0.181962 | 0.005068378 |
| chr8 | 1.1E+08  | 1.11E+08 | 1074 | 880  | 110500000 | 0.215047 | 0.001207452 |
| chr8 | 1.11E+08 | 1.11E+08 | 1071 | 926  | 110550000 | 0.137503 | 0.025802805 |
| chr8 | 1.11E+08 | 1.11E+08 | 1003 | 813  | 111300000 | 0.230623 | 0.00057525  |
| chr8 | 1.11E+08 | 1.11E+08 | 1075 | 857  | 111350000 | 0.254598 | 0.000169199 |
| chr8 | 1.11E+08 | 1.11E+08 | 1029 | 881  | 111400000 | 0.151657 | 0.015950925 |
| chr8 | 1.11E+08 | 1.12E+08 | 1038 | 858  | 111500000 | 0.202385 | 0.002138438 |
| chr8 | 1.12E+08 | 1.12E+08 | 1026 | 883  | 111650000 | 0.144174 | 0.020658192 |
| chr8 | 1.12E+08 | 1.12E+08 | 1061 | 906  | 111700000 | 0.15547  | 0.013930047 |

|      |          |          |      |     |           |          |             |
|------|----------|----------|------|-----|-----------|----------|-------------|
| chr8 | 1.12E+08 | 1.12E+08 | 1037 | 905 | 111750000 | 0.124054 | 0.039470512 |
| chr8 | 1.12E+08 | 1.12E+08 | 1048 | 880 | 111800000 | 0.179692 | 0.005553637 |
| chr8 | 1.12E+08 | 1.12E+08 | 1044 | 895 | 111850000 | 0.14979  | 0.017029276 |
| chr8 | 1.12E+08 | 1.12E+08 | 1053 | 920 | 111900000 | 0.122428 | 0.041465914 |
| chr8 | 1.12E+08 | 1.12E+08 | 1001 | 848 | 111950000 | 0.166934 | 0.009129607 |
| chr8 | 1.12E+08 | 1.12E+08 | 987  | 854 | 112150000 | 0.136442 | 0.026712307 |
| chr8 | 1.12E+08 | 1.12E+08 | 916  | 789 | 112200000 | 0.142951 | 0.02153019  |
| chr8 | 1.12E+08 | 1.12E+08 | 1100 | 901 | 112350000 | 0.215533 | 0.001180595 |
| chr8 | 1.12E+08 | 1.12E+08 | 1003 | 876 | 112400000 | 0.122947 | 0.040820287 |
| chr8 | 1.12E+08 | 1.13E+08 | 1019 | 857 | 112500000 | 0.177415 | 0.006081338 |
| chr8 | 1.13E+08 | 1.13E+08 | 1001 | 817 | 112550000 | 0.220662 | 0.000928738 |
| chr8 | 1.13E+08 | 1.13E+08 | 1018 | 888 | 112700000 | 0.124734 | 0.038660126 |
| chr8 | 1.13E+08 | 1.13E+08 | 881  | 758 | 113200000 | 0.144572 | 0.02038045  |
| chr8 | 1.13E+08 | 1.13E+08 | 913  | 783 | 113250000 | 0.149231 | 0.017364431 |
| chr8 | 1.13E+08 | 1.13E+08 | 1024 | 880 | 113300000 | 0.146269 | 0.019234364 |
| chr8 | 1.13E+08 | 1.13E+08 | 1022 | 895 | 113350000 | 0.119064 | 0.04585327  |
| chr8 | 1.13E+08 | 1.14E+08 | 1037 | 885 | 113450000 | 0.156295 | 0.013523235 |
| chr8 | 1.13E+08 | 1.14E+08 | 1025 | 857 | 113500000 | 0.185885 | 0.004318485 |
| chr8 | 1.14E+08 | 1.14E+08 | 938  | 816 | 113750000 | 0.128647 | 0.034256252 |
| chr8 | 1.14E+08 | 1.14E+08 | 1010 | 847 | 113800000 | 0.18155  | 0.005153562 |
| chr8 | 1.14E+08 | 1.14E+08 | 1031 | 856 | 113850000 | 0.19599  | 0.002823922 |
| chr8 | 1.14E+08 | 1.14E+08 | 1066 | 889 | 114200000 | 0.18958  | 0.00370481  |
| chr8 | 1.14E+08 | 1.14E+08 | 1033 | 828 | 114250000 | 0.246766 | 0.000255135 |
| chr8 | 1.14E+08 | 1.14E+08 | 966  | 809 | 114300000 | 0.183512 | 0.004759237 |
| chr8 | 1.15E+08 | 1.15E+08 | 991  | 850 | 114600000 | 0.14905  | 0.017473641 |
| chr8 | 1.15E+08 | 1.15E+08 | 1026 | 878 | 114650000 | 0.152366 | 0.01555717  |
| chr8 | 1.15E+08 | 1.15E+08 | 1029 | 858 | 114800000 | 0.189822 | 0.003667608 |
| chr8 | 1.15E+08 | 1.15E+08 | 995  | 796 | 114850000 | 0.249556 | 0.000220671 |
| chr8 | 1.15E+08 | 1.15E+08 | 942  | 792 | 114900000 | 0.177855 | 0.005976064 |
| chr8 | 1.15E+08 | 1.15E+08 | 949  | 823 | 115100000 | 0.133144 | 0.029714789 |
| chr8 | 1.15E+08 | 1.15E+08 | 890  | 770 | 115200000 | 0.136575 | 0.026596884 |
| chr8 | 1.15E+08 | 1.15E+08 | 880  | 717 | 115250000 | 0.223159 | 0.000825005 |
| chr8 | 1.15E+08 | 1.15E+08 | 897  | 763 | 115300000 | 0.161053 | 0.011371626 |
| chr8 | 1.15E+08 | 1.15E+08 | 1020 | 867 | 115350000 | 0.162093 | 0.01094313  |
| chr8 | 1.15E+08 | 1.15E+08 | 1066 | 871 | 115400000 | 0.219091 | 0.001000055 |
| chr8 | 1.15E+08 | 1.16E+08 | 1069 | 880 | 115450000 | 0.208315 | 0.001641964 |
| chr8 | 1.15E+08 | 1.16E+08 | 975  | 804 | 115500000 | 0.205835 | 0.001835139 |
| chr8 | 1.16E+08 | 1.16E+08 | 911  | 789 | 115550000 | 0.135054 | 0.027943531 |
| chr8 | 1.16E+08 | 1.16E+08 | 927  | 784 | 115650000 | 0.169344 | 0.008329453 |
| chr8 | 1.16E+08 | 1.16E+08 | 1031 | 818 | 115700000 | 0.2615   | 0.000116786 |
| chr8 | 1.16E+08 | 1.16E+08 | 1093 | 896 | 115750000 | 0.214351 | 0.001246885 |
| chr8 | 1.16E+08 | 1.16E+08 | 1118 | 893 | 115800000 | 0.251816 | 0.000196008 |
| chr8 | 1.16E+08 | 1.16E+08 | 1017 | 872 | 115850000 | 0.149548 | 0.017173825 |
| chr8 | 1.16E+08 | 1.16E+08 | 1025 | 830 | 1.16E+08  | 0.232069 | 0.000535827 |
| chr8 | 1.16E+08 | 1.16E+08 | 993  | 837 | 116050000 | 0.174194 | 0.006904107 |
| chr8 | 1.16E+08 | 1.16E+08 | 1025 | 860 | 116100000 | 0.180844 | 0.00530245  |
| chr8 | 1.17E+08 | 1.17E+08 | 943  | 826 | 116800000 | 0.118744 | 0.046288901 |

|      |          |          |      |      |           |          |             |
|------|----------|----------|------|------|-----------|----------|-------------|
| chr8 | 1.17E+08 | 1.17E+08 | 1057 | 876  | 1.17E+08  | 0.198601 | 0.002523055 |
| chr8 | 1.17E+08 | 1.17E+08 | 1072 | 905  | 117050000 | 0.171943 | 0.007536226 |
| chr8 | 1.17E+08 | 1.17E+08 | 1075 | 922  | 117100000 | 0.149126 | 0.017427673 |
| chr8 | 1.17E+08 | 1.17E+08 | 1071 | 894  | 117150000 | 0.18824  | 0.003917692 |
| chr8 | 1.17E+08 | 1.17E+08 | 1013 | 862  | 117300000 | 0.160503 | 0.011604247 |
| chr8 | 1.17E+08 | 1.18E+08 | 941  | 809  | 117450000 | 0.145683 | 0.019623464 |
| chr8 | 1.17E+08 | 1.18E+08 | 1033 | 904  | 117500000 | 0.120074 | 0.044498413 |
| chr8 | 1.19E+08 | 1.19E+08 | 1144 | 940  | 118700000 | 0.210983 | 0.001455025 |
| chr8 | 1.2E+08  | 1.2E+08  | 954  | 1000 | 119750000 | -0.14031 | 0.023252034 |
| chr8 | 1.2E+08  | 1.2E+08  | 1007 | 882  | 119850000 | 0.118841 | 0.04615616  |
| chr8 | 1.2E+08  | 1.2E+08  | 832  | 719  | 120300000 | 0.13822  | 0.02520236  |
| chr8 | 1.2E+08  | 1.2E+08  | 871  | 739  | 120350000 | 0.164727 | 0.009921023 |
| chr8 | 1.21E+08 | 1.21E+08 | 1003 | 851  | 120600000 | 0.164719 | 0.009923918 |
| chr8 | 1.21E+08 | 1.21E+08 | 927  | 812  | 120800000 | 0.118718 | 0.046325001 |
| chr8 | 1.21E+08 | 1.21E+08 | 902  | 783  | 120850000 | 0.131743 | 0.031072119 |
| chr8 | 1.21E+08 | 1.21E+08 | 949  | 816  | 121200000 | 0.145467 | 0.019768808 |
| chr8 | 1.21E+08 | 1.21E+08 | 976  | 854  | 121250000 | 0.120273 | 0.044234652 |
| chr8 | 1.22E+08 | 1.22E+08 | 1014 | 884  | 121700000 | 0.125568 | 0.037685231 |
| chr8 | 1.22E+08 | 1.22E+08 | 952  | 828  | 122050000 | 0.128959 | 0.033923634 |
| chr8 | 1.22E+08 | 1.22E+08 | 904  | 935  | 122150000 | -0.12102 | 0.042935034 |
| chr8 | 1.23E+08 | 1.23E+08 | 985  | 835  | 122650000 | 0.165976 | 0.009466089 |
| chr8 | 1.23E+08 | 1.23E+08 | 1009 | 876  | 122800000 | 0.131552 | 0.031261877 |
| chr8 | 1.23E+08 | 1.23E+08 | 1099 | 929  | 122900000 | 0.170069 | 0.00810108  |
| chr8 | 1.23E+08 | 1.23E+08 | 1035 | 854  | 122950000 | 0.204951 | 0.001908865 |
| chr8 | 1.23E+08 | 1.23E+08 | 1035 | 881  | 123150000 | 0.160045 | 0.011800727 |
| chr8 | 1.23E+08 | 1.23E+08 | 952  | 830  | 123350000 | 0.125478 | 0.037788535 |
| chr8 | 1.23E+08 | 1.23E+08 | 1068 | 933  | 123400000 | 0.122591 | 0.041262331 |
| chr8 | 1.24E+08 | 1.24E+08 | 1053 | 1092 | 123600000 | -0.12484 | 0.038217021 |
| chr8 | 1.24E+08 | 1.24E+08 | 1058 | 1099 | 123650000 | -0.12722 | 0.035495854 |
| chr8 | 1.24E+08 | 1.24E+08 | 1055 | 1121 | 123850000 | -0.15992 | 0.011664649 |
| chr8 | 1.25E+08 | 1.25E+08 | 898  | 926  | 125250000 | -0.11667 | 0.048859871 |
| chr8 | 1.25E+08 | 1.25E+08 | 968  | 811  | 125350000 | 0.182933 | 0.004872567 |
| chr8 | 1.26E+08 | 1.26E+08 | 971  | 849  | 126300000 | 0.121335 | 0.042852228 |
| chr8 | 1.26E+08 | 1.27E+08 | 941  | 981  | 126500000 | -0.13243 | 0.030104955 |
| chr8 | 1.27E+08 | 1.27E+08 | 960  | 1035 | 126550000 | -0.1809  | 0.005170675 |
| chr8 | 1.27E+08 | 1.27E+08 | 1027 | 1061 | 126650000 | -0.11936 | 0.045118485 |
| chr8 | 1.27E+08 | 1.27E+08 | 1021 | 873  | 127050000 | 0.153558 | 0.014914187 |
| chr8 | 1.27E+08 | 1.27E+08 | 1031 | 896  | 127300000 | 0.130102 | 0.032728046 |
| chr8 | 1.27E+08 | 1.27E+08 | 880  | 936  | 127400000 | -0.16138 | 0.011049813 |
| chr8 | 1.28E+08 | 1.28E+08 | 958  | 1019 | 127850000 | -0.16143 | 0.011028682 |
| chr8 | 1.28E+08 | 1.28E+08 | 959  | 1023 | 127900000 | -0.16558 | 0.009438345 |
| chr8 | 1.28E+08 | 1.28E+08 | 1002 | 879  | 128200000 | 0.116576 | 0.04933333  |
| chr8 | 1.29E+08 | 1.29E+08 | 851  | 897  | 128800000 | -0.14832 | 0.017684891 |
| chr8 | 1.3E+08  | 1.3E+08  | 1128 | 950  | 130100000 | 0.175396 | 0.00658629  |
| chr8 | 1.31E+08 | 1.31E+08 | 983  | 1039 | 131150000 | -0.1523  | 0.015369856 |
| chr8 | 1.31E+08 | 1.31E+08 | 990  | 1023 | 131200000 | -0.11968 | 0.044693179 |
| chr8 | 1.32E+08 | 1.32E+08 | 997  | 1035 | 131750000 | -0.12634 | 0.036488273 |

|      |          |          |      |      |           |          |             |
|------|----------|----------|------|------|-----------|----------|-------------|
| chr8 | 1.32E+08 | 1.32E+08 | 1049 | 1082 | 131850000 | -0.11706 | 0.048304194 |
| chr8 | 1.32E+08 | 1.32E+08 | 978  | 1019 | 131900000 | -0.13162 | 0.03089669  |
| chr8 | 1.32E+08 | 1.32E+08 | 1095 | 934  | 132400000 | 0.157065 | 0.013152853 |
| chr8 | 1.32E+08 | 1.33E+08 | 1103 | 945  | 132450000 | 0.150675 | 0.016510867 |
| chr8 | 1.33E+08 | 1.33E+08 | 1041 | 1078 | 133350000 | -0.12276 | 0.040728339 |
| chr8 | 1.34E+08 | 1.34E+08 | 1080 | 1147 | 133900000 | -0.15921 | 0.011973535 |
| chr8 | 1.34E+08 | 1.34E+08 | 1129 | 1205 | 133950000 | -0.16636 | 0.009161316 |
| chr8 | 1.34E+08 | 1.34E+08 | 1130 | 1184 | 134200000 | -0.13972 | 0.02371697  |
| chr8 | 1.34E+08 | 1.34E+08 | 1122 | 1191 | 134250000 | -0.15847 | 0.01230039  |
| chr8 | 1.34E+08 | 1.34E+08 | 1046 | 1113 | 134300000 | -0.16194 | 0.010819548 |
| chr8 | 1.34E+08 | 1.34E+08 | 1046 | 1080 | 134350000 | -0.11852 | 0.046260424 |
| chr8 | 1.35E+08 | 1.35E+08 | 937  | 1021 | 134900000 | -0.19623 | 0.002714799 |
| chr8 | 1.35E+08 | 1.36E+08 | 1061 | 1144 | 135500000 | -0.18103 | 0.005141761 |
| chr8 | 1.36E+08 | 1.36E+08 | 1033 | 1066 | 135850000 | -0.11774 | 0.047343283 |
| chr8 | 1.36E+08 | 1.36E+08 | 1046 | 1080 | 135950000 | -0.11852 | 0.046260424 |
| chr8 | 1.36E+08 | 1.36E+08 | 951  | 1027 | 136250000 | -0.18329 | 0.004688818 |
| chr8 | 1.37E+08 | 1.37E+08 | 1061 | 926  | 136550000 | 0.123969 | 0.039573581 |
| chr8 | 1.37E+08 | 1.37E+08 | 1016 | 1058 | 137150000 | -0.13081 | 0.031703326 |
| chr8 | 1.37E+08 | 1.38E+08 | 988  | 853  | 137450000 | 0.139594 | 0.024085467 |
| chr8 | 1.37E+08 | 1.38E+08 | 974  | 834  | 137500000 | 0.151503 | 0.016037975 |
| chr8 | 1.38E+08 | 1.38E+08 | 1069 | 904  | 137550000 | 0.169495 | 0.008281284 |
| chr8 | 1.38E+08 | 1.38E+08 | 999  | 872  | 137700000 | 0.123785 | 0.039795791 |
| chr8 | 1.38E+08 | 1.38E+08 | 988  | 836  | 137750000 | 0.168636 | 0.008557728 |
| chr8 | 1.38E+08 | 1.38E+08 | 1028 | 880  | 137800000 | 0.151893 | 0.015819009 |
| chr8 | 1.38E+08 | 1.38E+08 | 1070 | 890  | 138350000 | 0.193362 | 0.0031592   |
| chr8 | 1.38E+08 | 1.38E+08 | 991  | 858  | 138400000 | 0.135536 | 0.027511091 |
| chr8 | 1.38E+08 | 1.39E+08 | 1006 | 1040 | 138500000 | -0.12032 | 0.043835144 |
| chr8 | 1.39E+08 | 1.39E+08 | 900  | 929  | 138600000 | -0.11813 | 0.046805194 |
| chr8 | 1.39E+08 | 1.39E+08 | 1003 | 1040 | 138650000 | -0.12463 | 0.038459321 |
| chr8 | 1.39E+08 | 1.39E+08 | 958  | 997  | 138950000 | -0.12994 | 0.032592193 |
| chr8 | 1.39E+08 | 1.39E+08 | 970  | 1045 | 1.39E+08  | -0.17982 | 0.005401716 |
| chr8 | 1.4E+08  | 1.4E+08  | 1073 | 1113 | 139650000 | -0.12518 | 0.037823422 |
| chr8 | 1.4E+08  | 1.4E+08  | 1013 | 1106 | 139700000 | -0.19909 | 0.002396812 |
| chr8 | 1.4E+08  | 1.4E+08  | 1029 | 1087 | 139750000 | -0.15148 | 0.015825735 |
| chr8 | 1.4E+08  | 1.4E+08  | 1066 | 1149 | 139800000 | -0.18054 | 0.005245351 |
| chr8 | 1.4E+08  | 1.4E+08  | 1064 | 1171 | 139850000 | -0.21061 | 0.001428265 |
| chr8 | 1.4E+08  | 1.4E+08  | 1042 | 1122 | 139900000 | -0.17909 | 0.005563079 |
| chr8 | 1.4E+08  | 1.4E+08  | 1010 | 1058 | 140250000 | -0.13936 | 0.024004839 |
| chr8 | 1.4E+08  | 1.4E+08  | 974  | 1076 | 140300000 | -0.21606 | 0.001109385 |
| chr8 | 1.4E+08  | 1.4E+08  | 1018 | 1133 | 140350000 | -0.22678 | 0.000663846 |
| chr8 | 1.4E+08  | 1.4E+08  | 1028 | 1075 | 140400000 | -0.13687 | 0.026064101 |
| chr8 | 1.41E+08 | 1.41E+08 | 1069 | 1126 | 140600000 | -0.14732 | 0.018313306 |
| chr8 | 1.41E+08 | 1.41E+08 | 1056 | 1174 | 140650000 | -0.22519 | 0.000717204 |
| chr8 | 1.41E+08 | 1.41E+08 | 1115 | 1158 | 140700000 | -0.12696 | 0.035784865 |
| chr8 | 1.41E+08 | 1.41E+08 | 1128 | 1189 | 140750000 | -0.14835 | 0.017664677 |
| chr8 | 1.41E+08 | 1.41E+08 | 1091 | 1237 | 140800000 | -0.25357 | 0.000168358 |
| chr8 | 1.41E+08 | 1.41E+08 | 1126 | 1211 | 140850000 | -0.17736 | 0.005962267 |



|      |          |          |      |      |           |          |             |
|------|----------|----------|------|------|-----------|----------|-------------|
| chr8 | 1.41E+08 | 1.41E+08 | 1087 | 1133 | 140900000 | -0.13217 | 0.030359431 |
| chr8 | 1.41E+08 | 1.41E+08 | 1005 | 1119 | 140950000 | -0.22739 | 0.000644523 |
| chr8 | 1.41E+08 | 1.41E+08 | 946  | 1071 | 1.41E+08  | -0.25142 | 0.000188827 |
| chr8 | 1.41E+08 | 1.41E+08 | 1012 | 1055 | 141050000 | -0.13241 | 0.030128829 |
| chr8 | 1.41E+08 | 1.41E+08 | 1053 | 1130 | 141100000 | -0.17419 | 0.006763758 |
| chr8 | 1.41E+08 | 1.41E+08 | 1045 | 1087 | 141150000 | -0.12922 | 0.03334089  |
| chr8 | 1.41E+08 | 1.42E+08 | 795  | 842  | 141450000 | -0.15524 | 0.013836586 |
| chr8 | 1.41E+08 | 1.42E+08 | 788  | 829  | 141500000 | -0.14555 | 0.019466787 |
| chr8 | 1.42E+08 | 1.42E+08 | 967  | 1026 | 141550000 | -0.15781 | 0.012600141 |
| chr8 | 1.42E+08 | 1.42E+08 | 1015 | 1114 | 141600000 | -0.20664 | 0.001711907 |
| chr8 | 1.42E+08 | 1.42E+08 | 919  | 951  | 141650000 | -0.12175 | 0.04199085  |
| chr8 | 1.42E+08 | 1.42E+08 | 1055 | 1092 | 142150000 | -0.1221  | 0.041549111 |
| chr8 | 1.42E+08 | 1.42E+08 | 1045 | 1150 | 142200000 | -0.2105  | 0.001435632 |
| chr8 | 1.42E+08 | 1.42E+08 | 1011 | 1133 | 142250000 | -0.23674 | 0.000404675 |
| chr8 | 1.42E+08 | 1.42E+08 | 1045 | 1101 | 142300000 | -0.14768 | 0.018081673 |
| chr8 | 1.42E+08 | 1.42E+08 | 1073 | 1228 | 142350000 | -0.26703 | 8.05E-05    |
| chr8 | 1.42E+08 | 1.42E+08 | 1108 | 1352 | 142400000 | -0.35951 | 2.15E-07    |
| chr8 | 1.42E+08 | 1.43E+08 | 1107 | 1321 | 142450000 | -0.32735 | 2.00E-06    |
| chr8 | 1.42E+08 | 1.43E+08 | 1086 | 1223 | 142500000 | -0.24377 | 0.000282196 |
| chr8 | 1.43E+08 | 1.43E+08 | 1111 | 1247 | 142550000 | -0.23897 | 0.000361182 |
| chr8 | 1.43E+08 | 1.43E+08 | 1099 | 1252 | 142600000 | -0.26041 | 0.000116137 |
| chr8 | 1.43E+08 | 1.43E+08 | 1110 | 1285 | 142650000 | -0.28358 | 3.11E-05    |
| chr8 | 1.43E+08 | 1.43E+08 | 1072 | 1343 | 142700000 | -0.39753 | 1.23E-08    |
| chr8 | 1.43E+08 | 1.43E+08 | 501  | 648  | 142750000 | -0.44355 | 2.81E-10    |
| chr8 | 1.43E+08 | 1.43E+08 | 275  | 305  | 142800000 | -0.22175 | 0.000846875 |
| chr8 | 1.43E+08 | 1.43E+08 | 860  | 956  | 142850000 | -0.22505 | 0.000722396 |
| chr8 | 1.43E+08 | 1.43E+08 | 1162 | 1253 | 142900000 | -0.18115 | 0.005117985 |
| chr8 | 1.43E+08 | 1.43E+08 | 1013 | 1067 | 1.43E+08  | -0.1473  | 0.018325364 |
| chr8 | 1.43E+08 | 1.43E+08 | 1163 | 1288 | 143050000 | -0.21965 | 0.000936021 |
| chr8 | 1.43E+08 | 1.43E+08 | 1159 | 1282 | 143100000 | -0.21789 | 0.001017742 |
| chr8 | 1.43E+08 | 1.43E+08 | 1105 | 1209 | 143150000 | -0.20214 | 0.002094738 |
| chr8 | 1.43E+08 | 1.43E+08 | 1072 | 1234 | 143200000 | -0.27541 | 5.00E-05    |
| chr8 | 1.43E+08 | 1.43E+08 | 1119 | 1330 | 143250000 | -0.32159 | 2.92E-06    |
| chr8 | 1.43E+08 | 1.43E+08 | 1109 | 1359 | 143300000 | -0.36566 | 1.37E-07    |
| chr8 | 1.43E+08 | 1.43E+08 | 1071 | 1350 | 143350000 | -0.40637 | 6.11E-09    |
| chr8 | 1.43E+08 | 1.43E+08 | 1081 | 1280 | 143400000 | -0.31615 | 4.16E-06    |
| chr8 | 1.43E+08 | 1.44E+08 | 1096 | 1181 | 143450000 | -0.18013 | 0.005333308 |
| chr8 | 1.43E+08 | 1.44E+08 | 1104 | 1235 | 143500000 | -0.23414 | 0.000461171 |
| chr8 | 1.44E+08 | 1.44E+08 | 1127 | 1405 | 143550000 | -0.39045 | 2.13E-08    |
| chr8 | 1.44E+08 | 1.44E+08 | 1156 | 1447 | 143600000 | -0.3963  | 1.35E-08    |
| chr8 | 1.44E+08 | 1.44E+08 | 1153 | 1335 | 143650000 | -0.28382 | 3.07E-05    |
| chr8 | 1.44E+08 | 1.44E+08 | 1039 | 1248 | 143700000 | -0.33679 | 1.06E-06    |
| chr8 | 1.44E+08 | 1.44E+08 | 928  | 1164 | 143750000 | -0.39927 | 1.07E-08    |
| chr8 | 1.44E+08 | 1.44E+08 | 976  | 1182 | 143800000 | -0.34865 | 4.65E-07    |
| chr8 | 1.44E+08 | 1.44E+08 | 1114 | 1385 | 143850000 | -0.38651 | 2.89E-08    |
| chr8 | 1.44E+08 | 1.44E+08 | 1021 | 1210 | 143900000 | -0.3174  | 3.84E-06    |
| chr8 | 1.44E+08 | 1.44E+08 | 814  | 893  | 143950000 | -0.206   | 0.001761978 |

|      |          |          |      |      |           |          |             |
|------|----------|----------|------|------|-----------|----------|-------------|
| chr8 | 1.44E+08 | 1.44E+08 | 871  | 959  | 1.44E+08  | -0.21123 | 0.001388414 |
| chr8 | 1.44E+08 | 1.44E+08 | 910  | 963  | 144050000 | -0.15404 | 0.014445123 |
| chr8 | 1.44E+08 | 1.44E+08 | 894  | 925  | 144100000 | -0.12155 | 0.042247914 |
| chr8 | 1.44E+08 | 1.44E+08 | 909  | 989  | 144150000 | -0.19406 | 0.002981705 |
| chr8 | 1.44E+08 | 1.44E+08 | 946  | 1106 | 144200000 | -0.29781 | 1.32E-05    |
| chr8 | 1.44E+08 | 1.44E+08 | 976  | 1158 | 144250000 | -0.31905 | 3.44E-06    |
| chr8 | 1.44E+08 | 1.44E+08 | 999  | 1077 | 144300000 | -0.18083 | 0.005183885 |
| chr8 | 1.44E+08 | 1.44E+08 | 1038 | 1078 | 144350000 | -0.12692 | 0.035830365 |
| chr8 | 1.44E+08 | 1.44E+08 | 988  | 1127 | 144400000 | -0.26228 | 0.000104838 |
| chr8 | 1.44E+08 | 1.45E+08 | 1018 | 1287 | 144450000 | -0.41065 | 4.34E-09    |
| chr8 | 1.44E+08 | 1.45E+08 | 1074 | 1297 | 144500000 | -0.34456 | 6.19E-07    |
| chr8 | 1.45E+08 | 1.45E+08 | 1073 | 1308 | 144550000 | -0.35808 | 2.38E-07    |
| chr8 | 1.45E+08 | 1.45E+08 | 1053 | 1390 | 144600000 | -0.47295 | 2.11E-11    |
| chr8 | 1.45E+08 | 1.45E+08 | 1060 | 1345 | 144650000 | -0.41591 | 2.83E-09    |
| chr8 | 1.45E+08 | 1.45E+08 | 983  | 1127 | 144700000 | -0.2696  | 6.97E-05    |
| chr8 | 1.45E+08 | 1.45E+08 | 880  | 927  | 144750000 | -0.14744 | 0.018236666 |
| chr8 | 1.45E+08 | 1.45E+08 | 982  | 1043 | 144800000 | -0.15932 | 0.011925099 |
| chr8 | 1.45E+08 | 1.45E+08 | 1060 | 1191 | 144850000 | -0.24048 | 0.000334399 |
| chr8 | 1.45E+08 | 1.45E+08 | 1017 | 1283 | 144900000 | -0.40757 | 5.55E-09    |
| chr8 | 1.45E+08 | 1.45E+08 | 976  | 1272 | 144950000 | -0.45452 | 1.09E-10    |
| chr8 | 1.45E+08 | 1.45E+08 | 1011 | 1340 | 1.45E+08  | -0.47882 | 1.24E-11    |
| chr8 | 1.45E+08 | 1.45E+08 | 1004 | 1291 | 145050000 | -0.4351  | 5.77E-10    |
| chr8 | 1.45E+08 | 1.45E+08 | 979  | 1088 | 145100000 | -0.22467 | 0.000735694 |
| chr8 | 1.45E+08 | 1.45E+08 | 835  | 968  | 145150000 | -0.2856  | 2.76E-05    |
| chr8 | 1.45E+08 | 1.45E+08 | 676  | 787  | 145200000 | -0.29171 | 1.91E-05    |
| chr8 | 1.45E+08 | 1.46E+08 | 2    | 3    | 145450000 | -0.65733 | 1.11E-19    |
| chr8 | 1.45E+08 | 1.46E+08 | 508  | 609  | 145500000 | -0.33399 | 1.28E-06    |
| chr8 | 1.46E+08 | 1.46E+08 | 968  | 1169 | 145550000 | -0.34457 | 6.18E-07    |
| chr8 | 1.46E+08 | 1.46E+08 | 928  | 1124 | 145600000 | -0.34882 | 4.60E-07    |
| chr8 | 1.46E+08 | 1.46E+08 | 1016 | 1238 | 145650000 | -0.35748 | 2.48E-07    |
| chr8 | 1.46E+08 | 1.46E+08 | 1113 | 1332 | 145700000 | -0.33151 | 1.51E-06    |
| chr8 | 1.46E+08 | 1.46E+08 | 1016 | 1196 | 145750000 | -0.30769 | 7.14E-06    |
| chr8 | 1.46E+08 | 1.46E+08 | 995  | 1032 | 145800000 | -0.12505 | 0.037974071 |
| chr8 | 1.46E+08 | 1.46E+08 | 948  | 989  | 145900000 | -0.13346 | 0.029128132 |
| chr8 | 1.46E+08 | 1.46E+08 | 884  | 931  | 145950000 | -0.14711 | 0.018447261 |
| chr8 | 1.46E+08 | 1.46E+08 | 865  | 914  | 1.46E+08  | -0.15187 | 0.015611103 |
| chr8 | 1.46E+08 | 1.46E+08 | 855  | 904  | 146050000 | -0.15277 | 0.015116878 |
| chr1 | 1        | 100000   | 7    | 14   | 50000     | -1.07237 | 8.26E-44    |
| chr1 | 450001   | 550000   | 1    | 3    | 5.00E+05  | -1.65733 | 2.87E-81    |
| chr1 | 500001   | 600000   | 8    | 9    | 550000    | -0.2423  | 0.000304577 |
| chr1 | 550001   | 650000   | 9    | 7    | 6.00E+05  | 0.290198 | 2.29E-05    |
| chr1 | 650001   | 750000   | 52   | 60   | 7.00E+05  | -0.27882 | 4.11E-05    |
| chr1 | 700001   | 800000   | 153  | 175  | 750000    | -0.2662  | 8.43E-05    |
| chr1 | 750001   | 850000   | 449  | 534  | 8.00E+05  | -0.3225  | 2.75E-06    |
| chr1 | 800001   | 900000   | 837  | 1113 | 850000    | -0.48353 | 8.05E-12    |
| chr1 | 850001   | 950000   | 967  | 1293 | 9.00E+05  | -0.49151 | 3.85E-12    |
| chr1 | 900001   | 1000000  | 995  | 1274 | 950000    | -0.42897 | 9.66E-10    |

|      |         |         |      |      |          |          |             |
|------|---------|---------|------|------|----------|----------|-------------|
| chr1 | 950001  | 1050000 | 952  | 1273 | 1.00E+06 | -0.49157 | 3.82E-12    |
| chr1 | 1000001 | 1100000 | 927  | 1231 | 1050000  | -0.48156 | 9.64E-12    |
| chr1 | 1050001 | 1150000 | 947  | 1260 | 1100000  | -0.48436 | 7.46E-12    |
| chr1 | 1100001 | 1200000 | 974  | 1249 | 1150000  | -0.43115 | 8.05E-10    |
| chr1 | 1150001 | 1250000 | 960  | 1261 | 1200000  | -0.46583 | 4.00E-11    |
| chr1 | 1200001 | 1300000 | 955  | 1375 | 1250000  | -0.59823 | 8.21E-17    |
| chr1 | 1250001 | 1350000 | 929  | 1269 | 1300000  | -0.52231 | 2.04E-13    |
| chr1 | 1300001 | 1400000 | 814  | 1005 | 1350000  | -0.37647 | 6.18E-08    |
| chr1 | 1350001 | 1450000 | 637  | 745  | 1400000  | -0.29832 | 1.28E-05    |
| chr1 | 1400001 | 1500000 | 665  | 742  | 1450000  | -0.23044 | 0.000554681 |
| chr1 | 1450001 | 1550000 | 800  | 873  | 1500000  | -0.19835 | 0.002475325 |
| chr1 | 1500001 | 1600000 | 631  | 727  | 1550000  | -0.27669 | 4.65E-05    |
| chr1 | 1550001 | 1650000 | 432  | 524  | 1600000  | -0.35091 | 3.97E-07    |
| chr1 | 1600001 | 1700000 | 413  | 480  | 1650000  | -0.28926 | 2.22E-05    |
| chr1 | 1650001 | 1750000 | 671  | 721  | 1700000  | -0.17606 | 0.006281042 |
| chr1 | 1750001 | 1850000 | 889  | 962  | 1800000  | -0.18623 | 0.004153292 |
| chr1 | 1800001 | 1900000 | 965  | 1026 | 1850000  | -0.1608  | 0.011288267 |
| chr1 | 1900001 | 2000000 | 951  | 1101 | 1950000  | -0.28367 | 3.09E-05    |
| chr1 | 1950001 | 2050000 | 993  | 1238 | 2.00E+06 | -0.39052 | 2.12E-08    |
| chr1 | 2000001 | 2100000 | 991  | 1152 | 2050000  | -0.28956 | 2.18E-05    |
| chr1 | 2050001 | 2150000 | 1001 | 1169 | 2100000  | -0.2962  | 1.46E-05    |
| chr1 | 2100001 | 2200000 | 966  | 1173 | 2150000  | -0.35248 | 3.55E-07    |
| chr1 | 2150001 | 2250000 | 965  | 1140 | 2200000  | -0.3128  | 5.16E-06    |
| chr1 | 2200001 | 2300000 | 994  | 1235 | 2250000  | -0.38557 | 3.10E-08    |
| chr1 | 2250001 | 2350000 | 988  | 1325 | 2300000  | -0.49578 | 2.58E-12    |
| chr1 | 2300001 | 2400000 | 1083 | 1362 | 2350000  | -0.40307 | 7.95E-09    |
| chr1 | 2350001 | 2450000 | 1181 | 1460 | 2400000  | -0.37833 | 5.37E-08    |
| chr1 | 2400001 | 2500000 | 1100 | 1468 | 2450000  | -0.48872 | 4.98E-12    |
| chr1 | 2450001 | 2550000 | 1015 | 1305 | 2500000  | -0.43494 | 5.85E-10    |
| chr1 | 2500001 | 2600000 | 941  | 1134 | 2550000  | -0.34153 | 7.63E-07    |
| chr1 | 2550001 | 2650000 | 634  | 779  | 2600000  | -0.36951 | 1.04E-07    |
| chr1 | 2600001 | 2700000 | 312  | 330  | 2650000  | -0.15329 | 0.014837967 |
| chr1 | 2650001 | 2750000 | 632  | 723  | 2700000  | -0.26644 | 8.32E-05    |
| chr1 | 2700001 | 2800000 | 1076 | 1266 | 2750000  | -0.30697 | 7.47E-06    |
| chr1 | 2750001 | 2850000 | 1130 | 1294 | 2800000  | -0.26789 | 7.67E-05    |
| chr1 | 2800001 | 2900000 | 1182 | 1356 | 2850000  | -0.2705  | 6.62E-05    |
| chr1 | 2850001 | 2950000 | 1180 | 1289 | 2900000  | -0.19984 | 0.002319275 |
| chr1 | 2900001 | 3000000 | 1178 | 1248 | 2950000  | -0.15565 | 0.013631668 |
| chr1 | 2950001 | 3050000 | 1139 | 1316 | 3.00E+06 | -0.28076 | 3.67E-05    |
| chr1 | 3000001 | 3100000 | 1084 | 1373 | 3050000  | -0.41334 | 3.49E-09    |
| chr1 | 3050001 | 3150000 | 1115 | 1269 | 3100000  | -0.25902 | 0.000125345 |
| chr1 | 3100001 | 3200000 | 1112 | 1205 | 3150000  | -0.18825 | 0.003816772 |
| chr1 | 3150001 | 3250000 | 1087 | 1310 | 3200000  | -0.34159 | 7.60E-07    |
| chr1 | 3200001 | 3300000 | 1106 | 1332 | 3250000  | -0.34061 | 8.13E-07    |
| chr1 | 3250001 | 3350000 | 1174 | 1366 | 3300000  | -0.2909  | 2.01E-05    |
| chr1 | 3300001 | 3400000 | 1177 | 1375 | 3350000  | -0.29669 | 1.42E-05    |
| chr1 | 3350001 | 3450000 | 1109 | 1392 | 3400000  | -0.40027 | 9.91E-09    |

|      |         |         |      |      |          |          |             |
|------|---------|---------|------|------|----------|----------|-------------|
| chr1 | 3400001 | 3500000 | 1139 | 1476 | 3450000  | -0.4463  | 2.22E-10    |
| chr1 | 3450001 | 3550000 | 1116 | 1372 | 3500000  | -0.37032 | 9.76E-08    |
| chr1 | 3500001 | 3600000 | 1051 | 1248 | 3550000  | -0.32023 | 3.19E-06    |
| chr1 | 3550001 | 3650000 | 1042 | 1308 | 3600000  | -0.40038 | 9.83E-09    |
| chr1 | 3600001 | 3700000 | 995  | 1254 | 3650000  | -0.40614 | 6.22E-09    |
| chr1 | 3650001 | 3750000 | 938  | 1017 | 3700000  | -0.18903 | 0.00369316  |
| chr1 | 3750001 | 3850000 | 934  | 976  | 3800000  | -0.13583 | 0.026965837 |
| chr1 | 3800001 | 3900000 | 467  | 493  | 3850000  | -0.15054 | 0.016362578 |
| chr1 | 3950001 | 4050000 | 560  | 626  | 4.00E+06 | -0.23311 | 0.000485694 |
| chr1 | 4000001 | 4100000 | 988  | 1101 | 4050000  | -0.2286  | 0.000607175 |
| chr1 | 4050001 | 4150000 | 968  | 1040 | 4100000  | -0.17588 | 0.006326641 |
| chr1 | 4100001 | 4200000 | 1016 | 1049 | 4150000  | -0.11849 | 0.046307384 |
| chr1 | 4250001 | 4350000 | 987  | 1036 | 4300000  | -0.14227 | 0.02176616  |
| chr1 | 4300001 | 4400000 | 1038 | 1086 | 4350000  | -0.13759 | 0.025452402 |
| chr1 | 4400001 | 4500000 | 1064 | 1149 | 4450000  | -0.18325 | 0.004696196 |
| chr1 | 4450001 | 4550000 | 1051 | 1130 | 4500000  | -0.17693 | 0.006066103 |
| chr1 | 4500001 | 4600000 | 1040 | 1124 | 4550000  | -0.18443 | 0.004473926 |
| chr1 | 4550001 | 4650000 | 990  | 1055 | 4600000  | -0.16411 | 0.009974021 |
| chr1 | 4600001 | 4700000 | 974  | 1052 | 4650000  | -0.18351 | 0.004646227 |
| chr1 | 4650001 | 4750000 | 1031 | 1151 | 4700000  | -0.23122 | 0.000533685 |
| chr1 | 4700001 | 4800000 | 1082 | 1195 | 4750000  | -0.21568 | 0.001129024 |
| chr1 | 4750001 | 4850000 | 1157 | 1200 | 4800000  | -0.12502 | 0.03800801  |
| chr1 | 4900001 | 5000000 | 931  | 965  | 4950000  | -0.12412 | 0.03907105  |
| chr1 | 4950001 | 5050000 | 1052 | 1086 | 5.00E+06 | -0.11826 | 0.046617256 |
| chr1 | 5250001 | 5350000 | 1023 | 1128 | 5300000  | -0.21333 | 0.001259761 |
| chr1 | 5300001 | 5400000 | 1049 | 1164 | 5350000  | -0.22245 | 0.000818943 |
| chr1 | 5350001 | 5450000 | 1103 | 1176 | 5400000  | -0.16483 | 0.009709448 |
| chr1 | 5450001 | 5550000 | 1082 | 1156 | 5500000  | -0.16781 | 0.008666778 |
| chr1 | 5500001 | 5600000 | 1068 | 1131 | 5550000  | -0.15506 | 0.013925763 |
| chr1 | 5550001 | 5650000 | 1053 | 1093 | 5600000  | -0.12616 | 0.036689591 |
| chr1 | 5600001 | 5700000 | 1037 | 1108 | 5650000  | -0.16791 | 0.008633268 |
| chr1 | 5650001 | 5750000 | 1176 | 1221 | 5700000  | -0.12655 | 0.036251367 |
| chr1 | 5700001 | 5800000 | 1145 | 1223 | 5750000  | -0.16745 | 0.008788424 |
| chr1 | 5750001 | 5850000 | 1001 | 1140 | 5800000  | -0.25996 | 0.000119045 |
| chr1 | 5800001 | 5900000 | 1055 | 1134 | 5850000  | -0.17655 | 0.006159385 |
| chr1 | 5850001 | 5950000 | 1105 | 1148 | 5900000  | -0.12745 | 0.035248039 |
| chr1 | 5950001 | 6050000 | 1054 | 1104 | 6.00E+06 | -0.13924 | 0.024100141 |
| chr1 | 6000001 | 6100000 | 1020 | 1191 | 6050000  | -0.29598 | 1.48E-05    |
| chr1 | 6050001 | 6150000 | 1041 | 1237 | 6100000  | -0.32125 | 2.99E-06    |
| chr1 | 6100001 | 6200000 | 1058 | 1234 | 6150000  | -0.29437 | 1.63E-05    |
| chr1 | 6150001 | 6250000 | 1015 | 1220 | 6200000  | -0.33777 | 9.88E-07    |
| chr1 | 6200001 | 6300000 | 913  | 1055 | 6250000  | -0.28093 | 3.63E-05    |
| chr1 | 6250001 | 6350000 | 971  | 1063 | 6300000  | -0.20297 | 0.002018725 |
| chr1 | 6300001 | 6400000 | 1065 | 1113 | 6350000  | -0.13597 | 0.026841316 |
| chr1 | 6350001 | 6450000 | 957  | 1001 | 6400000  | -0.13722 | 0.025761718 |
| chr1 | 6400001 | 6500000 | 824  | 954  | 6450000  | -0.28372 | 3.09E-05    |
| chr1 | 6450001 | 6550000 | 795  | 963  | 6500000  | -0.34895 | 4.55E-07    |

|      |          |          |      |      |          |          |             |
|------|----------|----------|------|------|----------|----------|-------------|
| chr1 | 6500001  | 6600000  | 940  | 1042 | 6550000  | -0.22099 | 0.000878041 |
| chr1 | 6550001  | 6650000  | 979  | 1017 | 6600000  | -0.12731 | 0.035399483 |
| chr1 | 6600001  | 6700000  | 902  | 1020 | 6650000  | -0.24974 | 0.000206401 |
| chr1 | 6650001  | 6750000  | 879  | 1010 | 6700000  | -0.27279 | 5.81E-05    |
| chr1 | 6700001  | 6800000  | 830  | 887  | 6750000  | -0.16819 | 0.008540787 |
| chr1 | 7100001  | 7200000  | 1088 | 1139 | 7150000  | -0.13846 | 0.024729386 |
| chr1 | 7150001  | 7250000  | 1084 | 1121 | 7200000  | -0.12079 | 0.043222925 |
| chr1 | 7200001  | 7300000  | 1012 | 1054 | 7250000  | -0.13104 | 0.031475745 |
| chr1 | 7250001  | 7350000  | 1009 | 1048 | 7300000  | -0.12708 | 0.035650237 |
| chr1 | 7450001  | 7550000  | 1069 | 1155 | 7500000  | -0.184   | 0.004553487 |
| chr1 | 7500001  | 7600000  | 1135 | 1185 | 7550000  | -0.13457 | 0.028099081 |
| chr1 | 7550001  | 7650000  | 1114 | 1182 | 7600000  | -0.15785 | 0.012582715 |
| chr1 | 7600001  | 7700000  | 1002 | 1147 | 7650000  | -0.26735 | 7.90E-05    |
| chr1 | 7650001  | 7750000  | 1013 | 1148 | 7700000  | -0.25286 | 0.000174844 |
| chr1 | 7700001  | 7800000  | 1060 | 1124 | 7750000  | -0.15695 | 0.013004021 |
| chr1 | 8100001  | 8200000  | 918  | 779  | 8150000  | 0.164499 | 0.010005918 |
| chr1 | 8150001  | 8250000  | 948  | 783  | 8200000  | 0.203503 | 0.002035498 |
| chr1 | 9200001  | 9300000  | 883  | 927  | 9250000  | -0.14253 | 0.021580003 |
| chr1 | 9250001  | 9350000  | 960  | 1052 | 9300000  | -0.2044  | 0.001893706 |
| chr1 | 9400001  | 9500000  | 1016 | 1085 | 9450000  | -0.16717 | 0.008883726 |
| chr1 | 9750001  | 9850000  | 876  | 930  | 9800000  | -0.15867 | 0.012210888 |
| chr1 | 9800001  | 9900000  | 773  | 834  | 9850000  | -0.18195 | 0.004953273 |
| chr1 | 9850001  | 9950000  | 894  | 960  | 9900000  | -0.17513 | 0.006516461 |
| chr1 | 9900001  | 10000000 | 903  | 948  | 9950000  | -0.14253 | 0.021576226 |
| chr1 | 10000001 | 10100000 | 755  | 621  | 10050000 | 0.209512 | 0.001555536 |
| chr1 | 10600001 | 10700000 | 1005 | 1036 | 10650000 | -0.1162  | 0.0495354   |
| chr1 | 10650001 | 10750000 | 1144 | 1263 | 10700000 | -0.21514 | 0.001158059 |
| chr1 | 10700001 | 10800000 | 1138 | 1322 | 10750000 | -0.28859 | 2.31E-05    |
| chr1 | 10750001 | 10850000 | 1086 | 1230 | 10800000 | -0.25201 | 0.000183005 |
| chr1 | 10800001 | 10900000 | 1100 | 1174 | 10850000 | -0.1663  | 0.009181828 |
| chr1 | 10850001 | 10950000 | 1043 | 1120 | 10900000 | -0.17513 | 0.006516461 |
| chr1 | 10900001 | 11000000 | 963  | 1010 | 10950000 | -0.14112 | 0.022629851 |
| chr1 | 10950001 | 11050000 | 930  | 963  | 1.10E+07 | -0.12268 | 0.040830049 |
| chr1 | 11000001 | 11100000 | 806  | 832  | 11050000 | -0.11818 | 0.046735798 |
| chr1 | 11050001 | 11150000 | 766  | 818  | 11100000 | -0.16713 | 0.008896694 |
| chr1 | 11100001 | 11200000 | 864  | 917  | 11150000 | -0.15826 | 0.012395547 |
| chr1 | 11400001 | 11500000 | 970  | 1002 | 11450000 | -0.1192  | 0.045337761 |
| chr1 | 11450001 | 11550000 | 1021 | 1112 | 11500000 | -0.19555 | 0.002796917 |
| chr1 | 11500001 | 11600000 | 1094 | 1231 | 11550000 | -0.24259 | 0.000300004 |
| chr1 | 11550001 | 11650000 | 1073 | 1166 | 11600000 | -0.19229 | 0.003216879 |
| chr1 | 11600001 | 11700000 | 1040 | 1107 | 11650000 | -0.16244 | 0.010619157 |
| chr1 | 11650001 | 11750000 | 929  | 1062 | 11700000 | -0.26541 | 8.81E-05    |
| chr1 | 11700001 | 11800000 | 921  | 1050 | 11750000 | -0.26149 | 0.000109491 |
| chr1 | 11750001 | 11850000 | 999  | 1040 | 11800000 | -0.1304  | 0.032121347 |
| chr1 | 11850001 | 11950000 | 967  | 1041 | 11900000 | -0.17875 | 0.0056387   |
| chr1 | 11900001 | 12000000 | 824  | 968  | 11950000 | -0.30473 | 8.60E-06    |
| chr1 | 11950001 | 12050000 | 809  | 919  | 1.20E+07 | -0.2563  | 0.000145335 |

|      |          |          |      |      |          |          |             |
|------|----------|----------|------|------|----------|----------|-------------|
| chr1 | 12000001 | 12100000 | 902  | 934  | 12050000 | -0.12267 | 0.04084242  |
| chr1 | 12150001 | 12250000 | 1044 | 1076 | 12200000 | -0.11593 | 0.049931423 |
| chr1 | 12200001 | 12300000 | 1030 | 1086 | 12250000 | -0.14875 | 0.017420856 |
| chr1 | 12300001 | 12400000 | 982  | 836  | 12350000 | 0.159848 | 0.011886105 |
| chr1 | 12350001 | 12450000 | 1051 | 883  | 12400000 | 0.178906 | 0.005731035 |
| chr1 | 12550001 | 12650000 | 950  | 1011 | 12600000 | -0.16216 | 0.010734009 |
| chr1 | 12600001 | 12700000 | 986  | 1031 | 12650000 | -0.13676 | 0.026159853 |
| chr1 | 12800001 | 12900000 | 492  | 536  | 12850000 | -0.19595 | 0.002748813 |
| chr1 | 12850001 | 12950000 | 175  | 184  | 12900000 | -0.14472 | 0.02002613  |
| chr1 | 12900001 | 13000000 | 81   | 92   | 12950000 | -0.25608 | 0.00014702  |
| chr1 | 12950001 | 13050000 | 7    | 6    | 1.30E+07 | 0.150021 | 0.016892961 |
| chr1 | 13000001 | 13100000 | 1    | 2    | 13050000 | -1.07237 | 8.26E-44    |
| chr1 | 13050001 | 13150000 | 11   | 12   | 13100000 | -0.1979  | 0.002524585 |
| chr1 | 13100001 | 13200000 | 129  | 107  | 13150000 | 0.197388 | 0.002658939 |
| chr1 | 13150001 | 13250000 | 121  | 106  | 13200000 | 0.118571 | 0.046526365 |
| chr1 | 13200001 | 13300000 | 2    | 10   | 13250000 | -2.3943  | 1.39E-120   |
| chr1 | 13400001 | 13500000 | 0    | 2    | 13450000 | #NAME?   | 1.59E-189   |
| chr1 | 13450001 | 13550000 | 1    | 3    | 13500000 | -1.65733 | 2.87E-81    |
| chr1 | 13650001 | 13750000 | 4    | 2    | 13700000 | 0.927628 | 7.06E-34    |
| chr1 | 13700001 | 13800000 | 211  | 219  | 13750000 | -0.12606 | 0.036803586 |
| chr1 | 14350001 | 14450000 | 1020 | 1064 | 14400000 | -0.1333  | 0.029273617 |
| chr1 | 14400001 | 14500000 | 1030 | 1083 | 14450000 | -0.14476 | 0.020000047 |
| chr1 | 14450001 | 14550000 | 1002 | 1051 | 14500000 | -0.14125 | 0.022529217 |
| chr1 | 15200001 | 15300000 | 957  | 995  | 15250000 | -0.12855 | 0.034052931 |
| chr1 | 15400001 | 15500000 | 1010 | 1081 | 15450000 | -0.17038 | 0.007849346 |
| chr1 | 15450001 | 15550000 | 984  | 1051 | 15500000 | -0.1674  | 0.008803346 |
| chr1 | 16000001 | 16100000 | 900  | 940  | 16050000 | -0.13511 | 0.027609213 |
| chr1 | 16200001 | 16300000 | 918  | 974  | 16250000 | -0.1578  | 0.012607196 |
| chr1 | 16250001 | 16350000 | 1001 | 1054 | 16300000 | -0.1468  | 0.018641142 |
| chr1 | 16300001 | 16400000 | 812  | 896  | 16350000 | -0.21439 | 0.001199247 |
| chr1 | 16350001 | 16450000 | 767  | 908  | 16400000 | -0.31584 | 4.24E-06    |
| chr1 | 16400001 | 16500000 | 989  | 1086 | 16450000 | -0.20735 | 0.001657562 |
| chr1 | 16450001 | 16550000 | 1069 | 1164 | 16500000 | -0.1952  | 0.002838901 |
| chr1 | 16500001 | 16600000 | 1013 | 1060 | 16550000 | -0.1378  | 0.025274555 |
| chr1 | 16800001 | 16900000 | 324  | 350  | 16850000 | -0.18373 | 0.004604364 |
| chr1 | 16850001 | 16950000 | 635  | 682  | 16900000 | -0.17539 | 0.006450782 |
| chr1 | 16900001 | 17000000 | 834  | 883  | 16950000 | -0.15474 | 0.014087871 |
| chr1 | 16950001 | 17050000 | 856  | 940  | 1.70E+07 | -0.20742 | 0.001652435 |
| chr1 | 17000001 | 17100000 | 732  | 794  | 17050000 | -0.18967 | 0.003595553 |
| chr1 | 17050001 | 17150000 | 184  | 199  | 17100000 | -0.18543 | 0.004291924 |
| chr1 | 17100001 | 17200000 | 33   | 26   | 17150000 | 0.271583 | 6.70E-05    |
| chr1 | 17200001 | 17300000 | 748  | 775  | 17250000 | -0.12353 | 0.039782463 |
| chr1 | 17250001 | 17350000 | 903  | 987  | 17300000 | -0.2007  | 0.002233098 |
| chr1 | 17300001 | 17400000 | 896  | 1005 | 17350000 | -0.238   | 0.000379621 |
| chr1 | 17350001 | 17450000 | 961  | 1000 | 17400000 | -0.12976 | 0.032774395 |
| chr1 | 17450001 | 17550000 | 1060 | 1100 | 17500000 | -0.12581 | 0.037087981 |
| chr1 | 17500001 | 17600000 | 1060 | 1133 | 17550000 | -0.16846 | 0.008455659 |

|      |          |          |      |      |          |          |             |
|------|----------|----------|------|------|----------|----------|-------------|
| chr1 | 17550001 | 17650000 | 977  | 1071 | 17600000 | -0.2049  | 0.001851717 |
| chr1 | 17600001 | 17700000 | 924  | 1039 | 17650000 | -0.2416  | 0.000315671 |
| chr1 | 17650001 | 17750000 | 950  | 993  | 17700000 | -0.13624 | 0.026608605 |
| chr1 | 17850001 | 17950000 | 1058 | 1176 | 17900000 | -0.22492 | 0.000726808 |
| chr1 | 17900001 | 18000000 | 1154 | 1234 | 17950000 | -0.16907 | 0.008257705 |
| chr1 | 17950001 | 18050000 | 1152 | 1193 | 1.80E+07 | -0.12283 | 0.040646385 |
| chr1 | 18000001 | 18100000 | 1078 | 1179 | 18050000 | -0.20158 | 0.002147578 |
| chr1 | 18150001 | 18250000 | 1066 | 1167 | 18200000 | -0.20297 | 0.00201884  |
| chr1 | 18200001 | 18300000 | 1064 | 1148 | 18250000 | -0.182   | 0.004944075 |
| chr1 | 18450001 | 18550000 | 1097 | 1139 | 18500000 | -0.12658 | 0.036218626 |
| chr1 | 18550001 | 18650000 | 1118 | 1188 | 18600000 | -0.15999 | 0.011633952 |
| chr1 | 18600001 | 18700000 | 1094 | 1184 | 18650000 | -0.18643 | 0.004118382 |
| chr1 | 18800001 | 18900000 | 1025 | 1099 | 18850000 | -0.17294 | 0.007104602 |
| chr1 | 18850001 | 18950000 | 963  | 1101 | 18900000 | -0.26558 | 8.73E-05    |
| chr1 | 18900001 | 19000000 | 1025 | 1100 | 18950000 | -0.17425 | 0.00674716  |
| chr1 | 18950001 | 19050000 | 1095 | 1144 | 1.90E+07 | -0.13553 | 0.027233464 |
| chr1 | 19100001 | 19200000 | 1104 | 1151 | 19150000 | -0.13252 | 0.030018838 |
| chr1 | 19150001 | 19250000 | 1053 | 1169 | 19200000 | -0.22314 | 0.000792079 |
| chr1 | 19200001 | 19300000 | 1050 | 1158 | 19250000 | -0.21362 | 0.001243191 |
| chr1 | 19250001 | 19350000 | 1060 | 1144 | 19300000 | -0.18239 | 0.004864242 |
| chr1 | 19300001 | 19400000 | 1044 | 1180 | 19350000 | -0.24904 | 0.000214235 |
| chr1 | 19350001 | 19450000 | 1067 | 1206 | 19400000 | -0.24904 | 0.000214183 |
| chr1 | 19400001 | 19500000 | 1056 | 1147 | 19450000 | -0.19163 | 0.003308939 |
| chr1 | 19550001 | 19650000 | 873  | 904  | 19600000 | -0.12271 | 0.04078534  |
| chr1 | 19600001 | 19700000 | 909  | 1043 | 19650000 | -0.27076 | 6.52E-05    |
| chr1 | 19650001 | 19750000 | 1007 | 1113 | 19700000 | -0.21676 | 0.001073217 |
| chr1 | 19700001 | 19800000 | 989  | 1036 | 19750000 | -0.13935 | 0.024007043 |
| chr1 | 19750001 | 19850000 | 937  | 968  | 19800000 | -0.11933 | 0.045159512 |
| chr1 | 20400001 | 20500000 | 1037 | 1076 | 20450000 | -0.12563 | 0.037291639 |
| chr1 | 20450001 | 20550000 | 1052 | 1135 | 20500000 | -0.18193 | 0.004957598 |
| chr1 | 20500001 | 20600000 | 1034 | 1095 | 20550000 | -0.15507 | 0.013922047 |
| chr1 | 20550001 | 20650000 | 1075 | 1117 | 20600000 | -0.12766 | 0.035010688 |
| chr1 | 20750001 | 20850000 | 1029 | 1081 | 20800000 | -0.1435  | 0.020882822 |
| chr1 | 20800001 | 20900000 | 957  | 992  | 20850000 | -0.12419 | 0.038983211 |
| chr1 | 20950001 | 21050000 | 960  | 1009 | 2.10E+07 | -0.14419 | 0.020393031 |
| chr1 | 21000001 | 21100000 | 923  | 1003 | 21050000 | -0.19229 | 0.003216695 |
| chr1 | 21250001 | 21350000 | 971  | 838  | 21300000 | 0.140149 | 0.02364557  |
| chr1 | 21300001 | 21400000 | 991  | 858  | 21350000 | 0.135536 | 0.027511091 |
| chr1 | 21500001 | 21600000 | 873  | 904  | 21550000 | -0.12271 | 0.04078534  |
| chr1 | 21750001 | 21850000 | 587  | 617  | 21800000 | -0.14428 | 0.020330358 |
| chr1 | 21800001 | 21900000 | 873  | 909  | 21850000 | -0.13067 | 0.031845359 |
| chr1 | 21850001 | 21950000 | 978  | 1125 | 21900000 | -0.27439 | 5.31E-05    |
| chr1 | 21900001 | 22000000 | 1035 | 1245 | 21950000 | -0.33889 | 9.15E-07    |
| chr1 | 21950001 | 22050000 | 985  | 1019 | 2.20E+07 | -0.12133 | 0.042529556 |
| chr1 | 22050001 | 22150000 | 790  | 837  | 22100000 | -0.15575 | 0.013584134 |
| chr1 | 22100001 | 22200000 | 893  | 964  | 22150000 | -0.18274 | 0.004795006 |
| chr1 | 22150001 | 22250000 | 1061 | 1166 | 22200000 | -0.20851 | 0.001572303 |

|      |          |          |      |      |          |          |             |
|------|----------|----------|------|------|----------|----------|-------------|
| chr1 | 22200001 | 22300000 | 949  | 1079 | 22250000 | -0.25759 | 0.000135521 |
| chr1 | 22250001 | 22350000 | 577  | 631  | 22300000 | -0.20144 | 0.002160738 |
| chr1 | 22450001 | 22550000 | 1076 | 1135 | 22500000 | -0.14939 | 0.017038251 |
| chr1 | 22500001 | 22600000 | 1102 | 1156 | 22550000 | -0.14139 | 0.022425609 |
| chr1 | 22650001 | 22750000 | 1108 | 1159 | 22700000 | -0.13729 | 0.025701095 |
| chr1 | 22850001 | 22950000 | 1144 | 1268 | 22900000 | -0.22084 | 0.000884566 |
| chr1 | 22900001 | 23000000 | 1095 | 1265 | 22950000 | -0.28058 | 3.71E-05    |
| chr1 | 22950001 | 23050000 | 1055 | 1177 | 2.30E+07 | -0.23024 | 0.000560016 |
| chr1 | 23000001 | 23100000 | 1080 | 1154 | 23050000 | -0.16798 | 0.008610155 |
| chr1 | 23050001 | 23150000 | 1143 | 1222 | 23100000 | -0.16879 | 0.008347328 |
| chr1 | 23100001 | 23200000 | 1144 | 1193 | 23150000 | -0.13288 | 0.029674182 |
| chr1 | 23650001 | 23750000 | 900  | 932  | 23700000 | -0.12278 | 0.040706241 |
| chr1 | 24000001 | 24100000 | 817  | 847  | 24050000 | -0.1244  | 0.038739171 |
| chr1 | 24050001 | 24150000 | 886  | 929  | 24100000 | -0.14074 | 0.0229171   |
| chr1 | 24400001 | 24500000 | 1062 | 1109 | 24450000 | -0.13485 | 0.027843886 |
| chr1 | 24600001 | 24700000 | 1010 | 1061 | 24650000 | -0.14344 | 0.020921345 |
| chr1 | 24650001 | 24750000 | 1041 | 1098 | 24700000 | -0.14928 | 0.017101809 |
| chr1 | 25150001 | 25250000 | 958  | 1045 | 25200000 | -0.19778 | 0.002538457 |
| chr1 | 25200001 | 25300000 | 1095 | 1210 | 25250000 | -0.21645 | 0.001089165 |
| chr1 | 25350001 | 25450000 | 1044 | 1091 | 25400000 | -0.1359  | 0.026903508 |
| chr1 | 25600001 | 25700000 | 260  | 311  | 25650000 | -0.33077 | 1.59E-06    |
| chr1 | 25650001 | 25750000 | 310  | 323  | 25700000 | -0.13164 | 0.030878661 |
| chr1 | 25850001 | 25950000 | 1045 | 1108 | 25900000 | -0.15683 | 0.013062262 |
| chr1 | 25900001 | 26000000 | 988  | 1042 | 25950000 | -0.14914 | 0.017183264 |
| chr1 | 26050001 | 26150000 | 1035 | 1175 | 26100000 | -0.2554  | 0.000152534 |
| chr1 | 26100001 | 26200000 | 960  | 1062 | 26150000 | -0.21805 | 0.001009991 |
| chr1 | 26300001 | 26400000 | 958  | 1027 | 26350000 | -0.17271 | 0.007168633 |
| chr1 | 26350001 | 26450000 | 894  | 1000 | 26400000 | -0.23403 | 0.000463898 |
| chr1 | 26600001 | 26700000 | 984  | 1057 | 26650000 | -0.17562 | 0.006392175 |
| chr1 | 26650001 | 26750000 | 914  | 951  | 26700000 | -0.12962 | 0.032920283 |
| chr1 | 27100001 | 27200000 | 890  | 924  | 27150000 | -0.12646 | 0.036350167 |
| chr1 | 27150001 | 27250000 | 899  | 943  | 27200000 | -0.14131 | 0.022486448 |
| chr1 | 27300001 | 27400000 | 855  | 897  | 27350000 | -0.14156 | 0.022300328 |
| chr1 | 27350001 | 27450000 | 867  | 938  | 27400000 | -0.18593 | 0.004204974 |
| chr1 | 27400001 | 27500000 | 927  | 995  | 27450000 | -0.1745  | 0.006681533 |
| chr1 | 27650001 | 27750000 | 990  | 1039 | 27700000 | -0.14207 | 0.021918787 |
| chr1 | 27800001 | 27900000 | 958  | 1025 | 27850000 | -0.1699  | 0.007998136 |
| chr1 | 27850001 | 27950000 | 1130 | 1296 | 27900000 | -0.27011 | 6.77E-05    |
| chr1 | 27900001 | 28000000 | 1044 | 1201 | 27950000 | -0.27449 | 5.28E-05    |
| chr1 | 27950001 | 28050000 | 873  | 921  | 2.80E+07 | -0.14959 | 0.016916007 |
| chr1 | 28650001 | 28750000 | 754  | 659  | 28700000 | 0.121914 | 0.042112789 |
| chr1 | 28700001 | 28800000 | 824  | 713  | 28750000 | 0.13637  | 0.026774811 |
| chr1 | 28750001 | 28850000 | 849  | 700  | 28800000 | 0.206038 | 0.001818585 |
| chr1 | 28900001 | 29000000 | 696  | 723  | 28950000 | -0.12728 | 0.035433265 |
| chr1 | 29250001 | 29350000 | 926  | 775  | 29300000 | 0.184444 | 0.004581492 |
| chr1 | 29300001 | 29400000 | 896  | 743  | 29350000 | 0.197765 | 0.002616074 |
| chr1 | 29400001 | 29500000 | 841  | 876  | 29450000 | -0.1312  | 0.031316201 |



|      |          |          |      |      |          |          |             |
|------|----------|----------|------|------|----------|----------|-------------|
| chr1 | 29450001 | 29550000 | 878  | 931  | 29500000 | -0.15693 | 0.013012325 |
| chr1 | 29500001 | 29600000 | 986  | 1043 | 29550000 | -0.15345 | 0.014753518 |
| chr1 | 29550001 | 29650000 | 1073 | 1168 | 29600000 | -0.19476 | 0.002893194 |
| chr1 | 29800001 | 29900000 | 825  | 856  | 29850000 | -0.12559 | 0.037344124 |
| chr1 | 29850001 | 29950000 | 289  | 315  | 29900000 | -0.19665 | 0.002665698 |
| chr1 | 30450001 | 30550000 | 1022 | 1080 | 30500000 | -0.15201 | 0.015532544 |
| chr1 | 30500001 | 30600000 | 1066 | 1230 | 30550000 | -0.27882 | 4.11E-05    |
| chr1 | 30550001 | 30650000 | 1039 | 1142 | 30600000 | -0.20874 | 0.001556337 |
| chr1 | 30700001 | 30800000 | 1088 | 1133 | 30750000 | -0.13084 | 0.031673005 |
| chr1 | 30750001 | 30850000 | 1011 | 1092 | 30800000 | -0.18356 | 0.004636909 |
| chr1 | 30950001 | 31050000 | 1016 | 1061 | 3.10E+07 | -0.1349  | 0.027799871 |
| chr1 | 31000001 | 31100000 | 1031 | 1084 | 31050000 | -0.14469 | 0.020046998 |
| chr1 | 31150001 | 31250000 | 1126 | 1202 | 31200000 | -0.1666  | 0.009077142 |
| chr1 | 31200001 | 31300000 | 1061 | 1198 | 31250000 | -0.24758 | 0.000231383 |
| chr1 | 31350001 | 31450000 | 945  | 988  | 31400000 | -0.13657 | 0.02632186  |
| chr1 | 31750001 | 31850000 | 1040 | 912  | 31800000 | 0.117106 | 0.04857432  |
| chr1 | 31800001 | 31900000 | 1071 | 923  | 31850000 | 0.142184 | 0.02209233  |
| chr1 | 31950001 | 32050000 | 914  | 944  | 3.20E+07 | -0.11896 | 0.045653656 |
| chr1 | 32000001 | 32100000 | 955  | 1112 | 32050000 | -0.29196 | 1.89E-05    |
| chr1 | 32050001 | 32150000 | 1054 | 1218 | 32100000 | -0.28101 | 3.62E-05    |
| chr1 | 32100001 | 32200000 | 1133 | 1322 | 32150000 | -0.29495 | 1.57E-05    |
| chr1 | 32150001 | 32250000 | 1130 | 1395 | 32200000 | -0.37631 | 6.25E-08    |
| chr1 | 32200001 | 32300000 | 1061 | 1210 | 32250000 | -0.26195 | 0.000106717 |
| chr1 | 32450001 | 32550000 | 805  | 835  | 32500000 | -0.12516 | 0.037842203 |
| chr1 | 32500001 | 32600000 | 821  | 855  | 32550000 | -0.13091 | 0.031599626 |
| chr1 | 32600001 | 32700000 | 872  | 976  | 32650000 | -0.23492 | 0.000443408 |
| chr1 | 32650001 | 32750000 | 846  | 932  | 32700000 | -0.21204 | 0.001337237 |
| chr1 | 32800001 | 32900000 | 880  | 944  | 32850000 | -0.17366 | 0.00690757  |
| chr1 | 33000001 | 33100000 | 788  | 669  | 33050000 | 0.163818 | 0.01026398  |
| chr1 | 33150001 | 33250000 | 875  | 907  | 33200000 | -0.12419 | 0.038985198 |
| chr1 | 33300001 | 33400000 | 952  | 1057 | 33350000 | -0.22331 | 0.000785524 |
| chr1 | 33400001 | 33500000 | 1020 | 868  | 33450000 | 0.16043  | 0.011635057 |
| chr1 | 33450001 | 33550000 | 947  | 831  | 33500000 | 0.116144 | 0.04995783  |
| chr1 | 33550001 | 33650000 | 1051 | 1093 | 33600000 | -0.1289  | 0.033676876 |
| chr1 | 33600001 | 33700000 | 937  | 1025 | 33650000 | -0.20187 | 0.002119526 |
| chr1 | 33750001 | 33850000 | 970  | 1049 | 33800000 | -0.18533 | 0.004310575 |
| chr1 | 33800001 | 33900000 | 1008 | 1053 | 33850000 | -0.13538 | 0.027363805 |
| chr1 | 33850001 | 33950000 | 992  | 1054 | 33900000 | -0.15983 | 0.011699331 |
| chr1 | 33900001 | 34000000 | 1004 | 1042 | 33950000 | -0.12597 | 0.036908461 |
| chr1 | 34100001 | 34200000 | 1005 | 1062 | 34150000 | -0.15196 | 0.015558963 |
| chr1 | 34150001 | 34250000 | 1078 | 1169 | 34200000 | -0.18929 | 0.003653266 |
| chr1 | 34350001 | 34450000 | 1129 | 1166 | 34400000 | -0.11889 | 0.045749372 |
| chr1 | 34600001 | 34700000 | 1142 | 1200 | 34650000 | -0.14384 | 0.020636655 |
| chr1 | 34650001 | 34750000 | 1075 | 1115 | 34700000 | -0.12508 | 0.037936052 |
| chr1 | 35250001 | 35350000 | 1061 | 1137 | 35300000 | -0.17218 | 0.007319174 |
| chr1 | 35300001 | 35400000 | 1063 | 1221 | 35350000 | -0.27229 | 5.98E-05    |
| chr1 | 35750001 | 35850000 | 899  | 770  | 35800000 | 0.151091 | 0.016271689 |

|      |          |          |      |      |          |          |             |
|------|----------|----------|------|------|----------|----------|-------------|
| chr1 | 36200001 | 36300000 | 939  | 803  | 36250000 | 0.153353 | 0.0150227   |
| chr1 | 36400001 | 36500000 | 915  | 774  | 36450000 | 0.169066 | 0.008418333 |
| chr1 | 36550001 | 36650000 | 1012 | 1076 | 36600000 | -0.16084 | 0.011271996 |
| chr1 | 36750001 | 36850000 | 903  | 990  | 36800000 | -0.20507 | 0.001837251 |
| chr1 | 37000001 | 37100000 | 1098 | 1222 | 37050000 | -0.22674 | 0.000665276 |
| chr1 | 37050001 | 37150000 | 1083 | 1179 | 37100000 | -0.1949  | 0.002875745 |
| chr1 | 37200001 | 37300000 | 1069 | 1179 | 37250000 | -0.21367 | 0.001239962 |
| chr1 | 37250001 | 37350000 | 1160 | 1223 | 37300000 | -0.14867 | 0.01746972  |
| chr1 | 37350001 | 37450000 | 1100 | 1178 | 37400000 | -0.17121 | 0.007601856 |
| chr1 | 37400001 | 37500000 | 1068 | 1224 | 37450000 | -0.26906 | 7.18E-05    |
| chr1 | 37450001 | 37550000 | 1063 | 1210 | 37500000 | -0.25924 | 0.000123868 |
| chr1 | 37500001 | 37600000 | 1125 | 1205 | 37550000 | -0.17148 | 0.007521724 |
| chr1 | 37650001 | 37750000 | 951  | 991  | 37700000 | -0.13181 | 0.03070761  |
| chr1 | 37700001 | 37800000 | 1132 | 1176 | 37750000 | -0.12739 | 0.035316519 |
| chr1 | 37850001 | 37950000 | 997  | 1039 | 37900000 | -0.1319  | 0.030618809 |
| chr1 | 37900001 | 38000000 | 888  | 933  | 37950000 | -0.14369 | 0.020745466 |
| chr1 | 38200001 | 38300000 | 865  | 995  | 38250000 | -0.27437 | 5.31E-05    |
| chr1 | 38300001 | 38400000 | 884  | 735  | 38350000 | 0.19393  | 0.003083758 |
| chr1 | 38350001 | 38450000 | 737  | 634  | 38400000 | 0.14481  | 0.020216476 |
| chr1 | 38700001 | 38800000 | 1082 | 1126 | 38750000 | -0.12988 | 0.032655719 |
| chr1 | 39150001 | 39250000 | 1013 | 1049 | 39200000 | -0.12275 | 0.040736522 |
| chr1 | 39650001 | 39750000 | 950  | 833  | 39700000 | 0.117239 | 0.048385147 |
| chr1 | 40100001 | 40200000 | 991  | 1037 | 40150000 | -0.13783 | 0.02525049  |
| chr1 | 40150001 | 40250000 | 822  | 866  | 40200000 | -0.1476  | 0.018133837 |
| chr1 | 40200001 | 40300000 | 769  | 799  | 40250000 | -0.12758 | 0.03509902  |
| chr1 | 41050001 | 41150000 | 973  | 1011 | 41100000 | -0.12764 | 0.035033941 |
| chr1 | 41250001 | 41350000 | 1127 | 1175 | 41300000 | -0.13255 | 0.029994193 |
| chr1 | 41350001 | 41450000 | 870  | 915  | 41400000 | -0.14513 | 0.01974973  |
| chr1 | 41400001 | 41500000 | 870  | 965  | 41450000 | -0.22189 | 0.000841374 |
| chr1 | 41700001 | 41800000 | 974  | 1083 | 41750000 | -0.22541 | 0.000709685 |
| chr1 | 41750001 | 41850000 | 1053 | 1179 | 41800000 | -0.23543 | 0.000432274 |
| chr1 | 41800001 | 41900000 | 1139 | 1270 | 41850000 | -0.22943 | 0.000582886 |
| chr1 | 41850001 | 41950000 | 1200 | 1268 | 41900000 | -0.15189 | 0.015596532 |
| chr1 | 41900001 | 42000000 | 1175 | 1382 | 41950000 | -0.30647 | 7.71E-06    |
| chr1 | 41950001 | 42050000 | 1095 | 1278 | 4.20E+07 | -0.29533 | 1.54E-05    |
| chr1 | 42000001 | 42100000 | 1058 | 1149 | 42050000 | -0.19141 | 0.003339534 |
| chr1 | 42050001 | 42150000 | 1108 | 1195 | 42100000 | -0.18142 | 0.005060721 |
| chr1 | 42100001 | 42200000 | 1150 | 1217 | 42150000 | -0.15407 | 0.014431626 |
| chr1 | 42150001 | 42250000 | 1082 | 1231 | 42200000 | -0.2585  | 0.000128937 |
| chr1 | 42200001 | 42300000 | 1028 | 1125 | 42250000 | -0.20246 | 0.002065435 |
| chr1 | 42550001 | 42650000 | 1011 | 1112 | 42600000 | -0.20975 | 0.001486352 |
| chr1 | 42600001 | 42700000 | 1008 | 1072 | 42650000 | -0.16118 | 0.011130471 |
| chr1 | 43150001 | 43250000 | 925  | 982  | 43200000 | -0.15864 | 0.012224421 |
| chr1 | 43950001 | 44050000 | 1046 | 1208 | 4.40E+07 | -0.28011 | 3.81E-05    |
| chr1 | 44000001 | 44100000 | 1070 | 1212 | 44050000 | -0.25215 | 0.000181598 |
| chr1 | 44050001 | 44150000 | 960  | 1006 | 44100000 | -0.1399  | 0.023576729 |
| chr1 | 44100001 | 44200000 | 926  | 955  | 44150000 | -0.11686 | 0.048585317 |

|      |          |          |      |      |          |          |             |
|------|----------|----------|------|------|----------|----------|-------------|
| chr1 | 44350001 | 44450000 | 1155 | 1195 | 44400000 | -0.12149 | 0.042325517 |
| chr1 | 44400001 | 44500000 | 1111 | 1217 | 44450000 | -0.20384 | 0.001941629 |
| chr1 | 44450001 | 44550000 | 983  | 1057 | 44500000 | -0.17708 | 0.006029393 |
| chr1 | 44700001 | 44800000 | 1180 | 1228 | 44750000 | -0.1299  | 0.032637769 |
| chr1 | 44750001 | 44850000 | 1075 | 1120 | 44800000 | -0.13153 | 0.030981292 |
| chr1 | 45000001 | 45100000 | 1092 | 1146 | 45050000 | -0.14201 | 0.021964009 |
| chr1 | 45050001 | 45150000 | 1077 | 1218 | 45100000 | -0.24987 | 0.000205028 |
| chr1 | 45100001 | 45200000 | 964  | 1057 | 45150000 | -0.20524 | 0.00182344  |
| chr1 | 45150001 | 45250000 | 840  | 880  | 45200000 | -0.13949 | 0.023901227 |
| chr1 | 45200001 | 45300000 | 874  | 924  | 45250000 | -0.15263 | 0.015191837 |
| chr1 | 46100001 | 46200000 | 892  | 771  | 46150000 | 0.137941 | 0.025434395 |
| chr1 | 46750001 | 46850000 | 860  | 735  | 46800000 | 0.154221 | 0.014566357 |
| chr1 | 46850001 | 46950000 | 996  | 1102 | 46900000 | -0.21828 | 0.000999106 |
| chr1 | 46900001 | 47000000 | 1089 | 1175 | 46950000 | -0.18203 | 0.004937555 |
| chr1 | 47100001 | 47200000 | 903  | 932  | 47150000 | -0.11798 | 0.047012969 |
| chr1 | 47650001 | 47750000 | 1010 | 1060 | 47700000 | -0.14208 | 0.021908612 |
| chr1 | 47750001 | 47850000 | 843  | 729  | 47800000 | 0.137242 | 0.026023852 |
| chr1 | 48200001 | 48300000 | 1121 | 1215 | 48250000 | -0.18854 | 0.00377001  |
| chr1 | 48250001 | 48350000 | 1157 | 1263 | 48300000 | -0.19884 | 0.002423393 |
| chr1 | 48300001 | 48400000 | 1139 | 1208 | 48350000 | -0.15722 | 0.012874475 |
| chr1 | 48750001 | 48850000 | 917  | 769  | 48800000 | 0.181566 | 0.005150082 |
| chr1 | 49100001 | 49200000 | 1137 | 1199 | 49150000 | -0.14897 | 0.01728758  |
| chr1 | 49150001 | 49250000 | 1114 | 1186 | 49200000 | -0.16273 | 0.010507358 |
| chr1 | 49550001 | 49650000 | 907  | 959  | 49600000 | -0.1528  | 0.015100764 |
| chr1 | 50300001 | 50400000 | 896  | 766  | 50350000 | 0.153783 | 0.014795352 |
| chr1 | 50350001 | 50450000 | 905  | 747  | 50400000 | 0.204438 | 0.001952903 |
| chr1 | 50400001 | 50500000 | 909  | 778  | 50450000 | 0.152138 | 0.015682761 |
| chr1 | 50750001 | 50850000 | 973  | 1048 | 50800000 | -0.1795  | 0.005471879 |
| chr1 | 50800001 | 50900000 | 887  | 1047 | 50850000 | -0.31163 | 5.56E-06    |
| chr1 | 50850001 | 50950000 | 986  | 1089 | 50900000 | -0.21572 | 0.001127212 |
| chr1 | 51450001 | 51550000 | 923  | 796  | 51500000 | 0.14119  | 0.022839692 |
| chr1 | 51500001 | 51600000 | 939  | 818  | 51550000 | 0.126653 | 0.036446364 |
| chr1 | 52400001 | 52500000 | 894  | 923  | 52450000 | -0.11843 | 0.046387779 |
| chr1 | 52900001 | 53000000 | 995  | 858  | 52950000 | 0.141347 | 0.022720468 |
| chr1 | 53200001 | 53300000 | 838  | 727  | 53250000 | 0.132623 | 0.030213621 |
| chr1 | 53400001 | 53500000 | 849  | 714  | 53450000 | 0.177469 | 0.006068432 |
| chr1 | 53450001 | 53550000 | 998  | 834  | 53500000 | 0.186621 | 0.004189505 |
| chr1 | 53500001 | 53600000 | 1164 | 1205 | 53550000 | -0.12231 | 0.041282623 |
| chr1 | 53550001 | 53650000 | 1071 | 1188 | 53600000 | -0.22195 | 0.000838843 |
| chr1 | 53800001 | 53900000 | 994  | 1073 | 53850000 | -0.1827  | 0.004802998 |
| chr1 | 53850001 | 53950000 | 984  | 1060 | 53900000 | -0.17971 | 0.00542629  |
| chr1 | 53900001 | 54000000 | 1050 | 1178 | 53950000 | -0.23832 | 0.000373391 |
| chr1 | 53950001 | 54050000 | 1080 | 1253 | 5.40E+07 | -0.28673 | 2.58E-05    |
| chr1 | 54000001 | 54100000 | 1092 | 1185 | 54050000 | -0.19029 | 0.003502742 |
| chr1 | 54050001 | 54150000 | 1133 | 1199 | 54100000 | -0.15406 | 0.014437587 |
| chr1 | 54100001 | 54200000 | 1126 | 1164 | 54150000 | -0.12026 | 0.04392593  |
| chr1 | 54150001 | 54250000 | 983  | 1055 | 54200000 | -0.17435 | 0.006720567 |

|      |          |          |      |      |          |          |             |
|------|----------|----------|------|------|----------|----------|-------------|
| chr1 | 54700001 | 54800000 | 1081 | 1147 | 54750000 | -0.15787 | 0.012574409 |
| chr1 | 54900001 | 55000000 | 832  | 905  | 54950000 | -0.19371 | 0.003027648 |
| chr1 | 54950001 | 55050000 | 892  | 967  | 5.50E+07 | -0.18884 | 0.003722437 |
| chr1 | 55200001 | 55300000 | 964  | 1091 | 55250000 | -0.25092 | 0.000193919 |
| chr1 | 55250001 | 55350000 | 981  | 1074 | 55300000 | -0.20304 | 0.002012385 |
| chr1 | 55350001 | 55450000 | 792  | 825  | 55400000 | -0.13127 | 0.031247765 |
| chr1 | 55400001 | 55500000 | 947  | 981  | 55450000 | -0.12326 | 0.040110856 |
| chr1 | 55500001 | 55600000 | 1058 | 1091 | 55550000 | -0.11668 | 0.048838746 |
| chr1 | 55900001 | 56000000 | 992  | 868  | 55950000 | 0.120273 | 0.044234652 |
| chr1 | 56050001 | 56150000 | 1038 | 861  | 56100000 | 0.19735  | 0.002663415 |
| chr1 | 56450001 | 56550000 | 1113 | 962  | 56500000 | 0.137973 | 0.025407729 |
| chr1 | 56850001 | 56950000 | 1032 | 1096 | 56900000 | -0.15918 | 0.011986426 |
| chr1 | 56900001 | 57000000 | 1037 | 1080 | 56950000 | -0.13099 | 0.031526059 |
| chr1 | 57150001 | 57250000 | 982  | 1047 | 57200000 | -0.16484 | 0.009705323 |
| chr1 | 57200001 | 57300000 | 1027 | 1094 | 57250000 | -0.16355 | 0.010188613 |
| chr1 | 57300001 | 57400000 | 1077 | 1115 | 57350000 | -0.1224  | 0.041178317 |
| chr1 | 57900001 | 58000000 | 965  | 1012 | 57950000 | -0.14098 | 0.022735884 |
| chr1 | 58450001 | 58550000 | 1033 | 1134 | 58500000 | -0.20695 | 0.001687987 |
| chr1 | 60150001 | 60250000 | 988  | 1076 | 60200000 | -0.19547 | 0.002806463 |
| chr1 | 60200001 | 60300000 | 995  | 1036 | 60250000 | -0.13063 | 0.031888977 |
| chr1 | 60900001 | 61000000 | 919  | 791  | 60950000 | 0.144015 | 0.020769277 |
| chr1 | 60950001 | 61050000 | 985  | 800  | 6.10E+07 | 0.227752 | 0.000661581 |
| chr1 | 61000001 | 61100000 | 1067 | 929  | 61050000 | 0.127438 | 0.035570609 |
| chr1 | 61550001 | 61650000 | 1100 | 960  | 61600000 | 0.124025 | 0.03950537  |
| chr1 | 61800001 | 61900000 | 1088 | 951  | 61850000 | 0.12179  | 0.042271135 |
| chr1 | 62150001 | 62250000 | 845  | 707  | 62200000 | 0.184869 | 0.00450242  |
| chr1 | 62200001 | 62300000 | 879  | 733  | 62250000 | 0.189678 | 0.003689684 |
| chr1 | 62950001 | 63050000 | 954  | 825  | 6.30E+07 | 0.137223 | 0.026039751 |
| chr1 | 63000001 | 63100000 | 932  | 804  | 63050000 | 0.140763 | 0.023167933 |
| chr1 | 63200001 | 63300000 | 875  | 755  | 63250000 | 0.140435 | 0.023422375 |
| chr1 | 63850001 | 63950000 | 930  | 796  | 63900000 | 0.152091 | 0.015709261 |
| chr1 | 64550001 | 64650000 | 958  | 995  | 64600000 | -0.12704 | 0.035696556 |
| chr1 | 64650001 | 64750000 | 907  | 786  | 64700000 | 0.134201 | 0.028722865 |
| chr1 | 65600001 | 65700000 | 881  | 942  | 65650000 | -0.16896 | 0.008294096 |
| chr1 | 65650001 | 65750000 | 889  | 938  | 65700000 | -0.14978 | 0.016806486 |
| chr1 | 65700001 | 65800000 | 955  | 1009 | 65750000 | -0.15173 | 0.01568912  |
| chr1 | 65750001 | 65850000 | 1042 | 1077 | 65800000 | -0.12003 | 0.044218104 |
| chr1 | 65950001 | 66050000 | 862  | 743  | 6.60E+07 | 0.141954 | 0.022263643 |
| chr1 | 66000001 | 66100000 | 911  | 756  | 66050000 | 0.196693 | 0.00273985  |
| chr1 | 66250001 | 66350000 | 1003 | 855  | 66300000 | 0.157954 | 0.012736198 |
| chr1 | 66450001 | 66550000 | 1020 | 882  | 66500000 | 0.137347 | 0.025934777 |
| chr1 | 66500001 | 66600000 | 1025 | 882  | 66550000 | 0.144402 | 0.020499032 |
| chr1 | 67400001 | 67500000 | 1029 | 865  | 67450000 | 0.178099 | 0.005918271 |
| chr1 | 67550001 | 67650000 | 910  | 793  | 67600000 | 0.126174 | 0.036988722 |
| chr1 | 68000001 | 68100000 | 1033 | 1084 | 68050000 | -0.1419  | 0.022045474 |
| chr1 | 68600001 | 68700000 | 1096 | 946  | 68650000 | 0.139964 | 0.023791515 |
| chr1 | 68950001 | 69050000 | 1034 | 835  | 6.90E+07 | 0.236016 | 0.000440627 |

|      |          |          |      |     |          |          |             |
|------|----------|----------|------|-----|----------|----------|-------------|
| chr1 | 69550001 | 69650000 | 1003 | 815 | 69600000 | 0.227078 | 0.000683523 |
| chr1 | 69600001 | 69700000 | 1135 | 881 | 69650000 | 0.293107 | 1.93E-05    |
| chr1 | 69650001 | 69750000 | 1041 | 883 | 69700000 | 0.165113 | 0.009778307 |
| chr1 | 69800001 | 69900000 | 949  | 827 | 69850000 | 0.126149 | 0.037017141 |
| chr1 | 70050001 | 70150000 | 1041 | 885 | 70100000 | 0.161849 | 0.011042567 |
| chr1 | 70250001 | 70350000 | 949  | 827 | 70300000 | 0.126149 | 0.037017141 |
| chr1 | 70300001 | 70400000 | 829  | 718 | 70350000 | 0.135016 | 0.027977433 |
| chr1 | 70350001 | 70450000 | 879  | 681 | 70400000 | 0.295837 | 1.64E-05    |
| chr1 | 70400001 | 70500000 | 1011 | 803 | 70450000 | 0.259939 | 0.000127088 |
| chr1 | 70450001 | 70550000 | 1025 | 883 | 70500000 | 0.142767 | 0.021663841 |
| chr1 | 70700001 | 70800000 | 935  | 804 | 70750000 | 0.145399 | 0.019814785 |
| chr1 | 70750001 | 70850000 | 869  | 736 | 70800000 | 0.167279 | 0.009011199 |
| chr1 | 70800001 | 70900000 | 862  | 723 | 70850000 | 0.18132  | 0.005201477 |
| chr1 | 70850001 | 70950000 | 903  | 786 | 70900000 | 0.127825 | 0.035145475 |
| chr1 | 70950001 | 71050000 | 1033 | 882 | 7.10E+07 | 0.155618 | 0.013856286 |
| chr1 | 71050001 | 71150000 | 828  | 725 | 71100000 | 0.119278 | 0.045563227 |
| chr1 | 71100001 | 71200000 | 994  | 849 | 71150000 | 0.15511  | 0.014111098 |
| chr1 | 71350001 | 71450000 | 1045 | 910 | 71400000 | 0.127193 | 0.035842134 |
| chr1 | 71750001 | 71850000 | 962  | 812 | 71800000 | 0.172185 | 0.007465906 |
| chr1 | 71800001 | 71900000 | 1025 | 835 | 71850000 | 0.223404 | 0.000815408 |
| chr1 | 71850001 | 71950000 | 1070 | 877 | 71900000 | 0.21459  | 0.001233192 |
| chr1 | 71900001 | 72000000 | 1020 | 838 | 71950000 | 0.211175 | 0.001442315 |
| chr1 | 71950001 | 72050000 | 989  | 814 | 7.20E+07 | 0.20857  | 0.001623169 |
| chr1 | 72000001 | 72100000 | 1044 | 867 | 72050000 | 0.195646 | 0.002865872 |
| chr1 | 72050001 | 72150000 | 1077 | 927 | 72100000 | 0.144005 | 0.020776428 |
| chr1 | 72150001 | 72250000 | 1014 | 883 | 72200000 | 0.127201 | 0.03583345  |
| chr1 | 72200001 | 72300000 | 1034 | 902 | 72250000 | 0.124665 | 0.038741914 |
| chr1 | 72300001 | 72400000 | 974  | 843 | 72350000 | 0.136017 | 0.027084197 |
| chr1 | 72600001 | 72700000 | 1010 | 875 | 72650000 | 0.134629 | 0.02833016  |
| chr1 | 72650001 | 72750000 | 1027 | 888 | 72700000 | 0.137433 | 0.025861848 |
| chr1 | 72750001 | 72850000 | 583  | 494 | 72800000 | 0.166613 | 0.009241118 |
| chr1 | 72800001 | 72900000 | 805  | 704 | 72850000 | 0.121042 | 0.043230706 |
| chr1 | 72850001 | 72950000 | 950  | 833 | 72900000 | 0.117239 | 0.048385147 |
| chr1 | 72900001 | 73000000 | 1073 | 894 | 72950000 | 0.190932 | 0.003500798 |
| chr1 | 72950001 | 73050000 | 1069 | 915 | 7.30E+07 | 0.152046 | 0.015733705 |
| chr1 | 73000001 | 73100000 | 1052 | 905 | 73050000 | 0.144773 | 0.020241779 |
| chr1 | 73050001 | 73150000 | 1045 | 894 | 73100000 | 0.152784 | 0.015328744 |
| chr1 | 73250001 | 73350000 | 963  | 841 | 73300000 | 0.123058 | 0.04068311  |
| chr1 | 73300001 | 73400000 | 975  | 821 | 73350000 | 0.175648 | 0.006521217 |
| chr1 | 73350001 | 73450000 | 903  | 783 | 73400000 | 0.133342 | 0.029526919 |
| chr1 | 73400001 | 73500000 | 900  | 776 | 73450000 | 0.141497 | 0.022607207 |
| chr1 | 73450001 | 73550000 | 944  | 787 | 73500000 | 0.190051 | 0.003632496 |
| chr1 | 73500001 | 73600000 | 1005 | 809 | 73550000 | 0.240612 | 0.000349689 |
| chr1 | 73550001 | 73650000 | 1004 | 861 | 73600000 | 0.149302 | 0.017321249 |
| chr1 | 73650001 | 73750000 | 984  | 863 | 73700000 | 0.116926 | 0.048830925 |
| chr1 | 73750001 | 73850000 | 982  | 857 | 73800000 | 0.124056 | 0.03946856  |
| chr1 | 74100001 | 74200000 | 1034 | 906 | 74150000 | 0.118281 | 0.04692553  |

|      |          |          |      |      |          |          |             |
|------|----------|----------|------|------|----------|----------|-------------|
| chr1 | 74150001 | 74250000 | 1076 | 934  | 74200000 | 0.131812 | 0.031004558 |
| chr1 | 74250001 | 74350000 | 1027 | 876  | 74300000 | 0.157062 | 0.013154282 |
| chr1 | 74300001 | 74400000 | 1062 | 873  | 74350000 | 0.210358 | 0.001496925 |
| chr1 | 74350001 | 74450000 | 1073 | 874  | 74400000 | 0.223573 | 0.000808855 |
| chr1 | 74400001 | 74500000 | 1039 | 831  | 74450000 | 0.249904 | 0.000216702 |
| chr1 | 74450001 | 74550000 | 995  | 837  | 74500000 | 0.177097 | 0.006158511 |
| chr1 | 74500001 | 74600000 | 982  | 781  | 74550000 | 0.258029 | 0.000140867 |
| chr1 | 74550001 | 74650000 | 1020 | 843  | 74600000 | 0.202593 | 0.002118958 |
| chr1 | 74750001 | 74850000 | 976  | 844  | 74800000 | 0.137266 | 0.026003143 |
| chr1 | 74950001 | 75050000 | 963  | 1018 | 7.50E+07 | -0.1525  | 0.015262188 |
| chr1 | 75350001 | 75450000 | 915  | 775  | 75400000 | 0.167204 | 0.009036846 |
| chr1 | 75400001 | 75500000 | 1017 | 852  | 75450000 | 0.183023 | 0.00485493  |
| chr1 | 75800001 | 75900000 | 797  | 871  | 75850000 | -0.20046 | 0.002256001 |
| chr1 | 76200001 | 76300000 | 693  | 722  | 76250000 | -0.13152 | 0.030999686 |
| chr1 | 76250001 | 76350000 | 749  | 799  | 76300000 | -0.1656  | 0.009428916 |
| chr1 | 76500001 | 76600000 | 961  | 994  | 76550000 | -0.12108 | 0.042849994 |
| chr1 | 77750001 | 77850000 | 1044 | 884  | 77800000 | 0.167632 | 0.0088913   |
| chr1 | 77800001 | 77900000 | 1041 | 897  | 77850000 | 0.142418 | 0.0219192   |
| chr1 | 78150001 | 78250000 | 922  | 807  | 78200000 | 0.119826 | 0.044827398 |
| chr1 | 78950001 | 79050000 | 1076 | 903  | 7.90E+07 | 0.180508 | 0.005374459 |
| chr1 | 79000001 | 79100000 | 1034 | 861  | 79050000 | 0.191779 | 0.003378035 |
| chr1 | 79350001 | 79450000 | 998  | 813  | 79400000 | 0.223413 | 0.000815071 |
| chr1 | 79400001 | 79500000 | 978  | 806  | 79450000 | 0.206683 | 0.001766867 |
| chr1 | 79550001 | 79650000 | 1056 | 879  | 79600000 | 0.192303 | 0.003304144 |
| chr1 | 79800001 | 79900000 | 1051 | 895  | 79850000 | 0.159431 | 0.012068829 |
| chr1 | 79850001 | 79950000 | 1044 | 889  | 79900000 | 0.159495 | 0.012040933 |
| chr1 | 80150001 | 80250000 | 1012 | 854  | 80200000 | 0.17253  | 0.007366886 |
| chr1 | 80200001 | 80300000 | 1094 | 901  | 80250000 | 0.207642 | 0.001692443 |
| chr1 | 80250001 | 80350000 | 1050 | 917  | 80300000 | 0.123024 | 0.040725406 |
| chr1 | 80450001 | 80550000 | 987  | 841  | 80500000 | 0.158573 | 0.012452855 |
| chr1 | 80500001 | 80600000 | 969  | 841  | 80550000 | 0.132019 | 0.030800889 |
| chr1 | 80750001 | 80850000 | 1000 | 837  | 80800000 | 0.184329 | 0.004603166 |
| chr1 | 80800001 | 80900000 | 987  | 746  | 80850000 | 0.331503 | 1.72E-06    |
| chr1 | 80850001 | 80950000 | 953  | 797  | 80900000 | 0.185525 | 0.00438295  |
| chr1 | 80900001 | 81000000 | 969  | 845  | 80950000 | 0.125174 | 0.038143648 |
| chr1 | 80950001 | 81050000 | 980  | 817  | 8.10E+07 | 0.190074 | 0.003629082 |
| chr1 | 81050001 | 81150000 | 1008 | 871  | 81100000 | 0.138379 | 0.025070667 |
| chr1 | 81100001 | 81200000 | 1014 | 869  | 81150000 | 0.150258 | 0.016753569 |
| chr1 | 81200001 | 81300000 | 1013 | 875  | 81250000 | 0.138907 | 0.024637996 |
| chr1 | 81650001 | 81750000 | 955  | 834  | 81700000 | 0.123082 | 0.040654342 |
| chr1 | 81750001 | 81850000 | 1058 | 906  | 81800000 | 0.151385 | 0.016104501 |
| chr1 | 81800001 | 81900000 | 1085 | 889  | 81850000 | 0.215068 | 0.001206271 |
| chr1 | 81850001 | 81950000 | 1083 | 947  | 81900000 | 0.121225 | 0.042993595 |
| chr1 | 82300001 | 82400000 | 1037 | 825  | 82350000 | 0.257578 | 0.000144315 |
| chr1 | 82350001 | 82450000 | 1060 | 843  | 82400000 | 0.258088 | 0.000140419 |
| chr1 | 82800001 | 82900000 | 1014 | 885  | 82850000 | 0.123937 | 0.039612471 |
| chr1 | 83050001 | 83150000 | 985  | 848  | 83100000 | 0.143688 | 0.021000971 |

|      |          |          |      |      |          |          |             |
|------|----------|----------|------|------|----------|----------|-------------|
| chr1 | 83100001 | 83200000 | 1018 | 861  | 83150000 | 0.169281 | 0.008349643 |
| chr1 | 83600001 | 83700000 | 121  | 98   | 83650000 | 0.231782 | 0.000543452 |
| chr1 | 83650001 | 83750000 | 102  | 70   | 83700000 | 0.470771 | 3.63E-11    |
| chr1 | 83700001 | 83800000 | 90   | 76   | 83750000 | 0.171554 | 0.007650693 |
| chr1 | 83850001 | 83950000 | 105  | 78   | 83900000 | 0.356472 | 3.13E-07    |
| chr1 | 84000001 | 84100000 | 1009 | 1043 | 84050000 | -0.12018 | 0.044019842 |
| chr1 | 84950001 | 85050000 | 1020 | 892  | 8.50E+07 | 0.121082 | 0.043178709 |
| chr1 | 85000001 | 85100000 | 1024 | 889  | 85050000 | 0.131589 | 0.03122519  |
| chr1 | 85100001 | 85200000 | 993  | 1024 | 85150000 | -0.11672 | 0.048783383 |
| chr1 | 85700001 | 85800000 | 1014 | 1050 | 85750000 | -0.1227  | 0.040797052 |
| chr1 | 85800001 | 85900000 | 1038 | 904  | 85850000 | 0.12704  | 0.036012128 |
| chr1 | 86350001 | 86450000 | 895  | 781  | 86400000 | 0.124193 | 0.039303763 |
| chr1 | 86500001 | 86600000 | 959  | 798  | 86550000 | 0.19277  | 0.003239448 |
| chr1 | 86550001 | 86650000 | 937  | 820  | 86600000 | 0.120053 | 0.044525506 |
| chr1 | 86800001 | 86900000 | 1007 | 866  | 86850000 | 0.145253 | 0.019913777 |
| chr1 | 88400001 | 88500000 | 1159 | 975  | 88450000 | 0.177035 | 0.006173769 |
| chr1 | 88900001 | 89000000 | 1113 | 947  | 88950000 | 0.160645 | 0.011543487 |
| chr1 | 88950001 | 89050000 | 1103 | 943  | 8.90E+07 | 0.153731 | 0.014822331 |
| chr1 | 89150001 | 89250000 | 1006 | 864  | 89200000 | 0.147155 | 0.018657346 |
| chr1 | 89200001 | 89300000 | 998  | 832  | 89250000 | 0.190085 | 0.003627469 |
| chr1 | 91300001 | 91400000 | 947  | 829  | 91350000 | 0.119621 | 0.045102387 |
| chr1 | 91350001 | 91450000 | 993  | 846  | 91400000 | 0.158764 | 0.012366193 |
| chr1 | 91650001 | 91750000 | 838  | 717  | 91700000 | 0.152605 | 0.015426176 |
| chr1 | 91700001 | 91800000 | 835  | 663  | 91750000 | 0.260396 | 0.000123991 |
| chr1 | 91750001 | 91850000 | 816  | 671  | 91800000 | 0.209885 | 0.001529465 |
| chr1 | 91850001 | 91950000 | 996  | 1043 | 91900000 | -0.13889 | 0.024377194 |
| chr1 | 92000001 | 92100000 | 987  | 1042 | 92050000 | -0.15061 | 0.016323275 |
| chr1 | 92050001 | 92150000 | 914  | 967  | 92100000 | -0.15369 | 0.014626206 |
| chr1 | 92400001 | 92500000 | 907  | 746  | 92450000 | 0.209555 | 0.001552471 |
| chr1 | 92450001 | 92550000 | 940  | 808  | 92500000 | 0.145934 | 0.019456149 |
| chr1 | 92500001 | 92600000 | 973  | 846  | 92550000 | 0.12941  | 0.033447248 |
| chr1 | 92550001 | 92650000 | 1030 | 896  | 92600000 | 0.128702 | 0.034197505 |
| chr1 | 92900001 | 93000000 | 938  | 820  | 92950000 | 0.121592 | 0.042522557 |
| chr1 | 92950001 | 93050000 | 887  | 756  | 9.30E+07 | 0.158176 | 0.012633672 |
| chr1 | 93600001 | 93700000 | 970  | 817  | 93650000 | 0.175277 | 0.006617171 |
| chr1 | 93650001 | 93750000 | 952  | 810  | 93700000 | 0.160668 | 0.011533983 |
| chr1 | 93750001 | 93850000 | 988  | 859  | 93800000 | 0.129481 | 0.033373055 |
| chr1 | 94400001 | 94500000 | 1050 | 1091 | 94450000 | -0.12763 | 0.03504436  |
| chr1 | 94600001 | 94700000 | 963  | 836  | 94650000 | 0.131661 | 0.031153427 |
| chr1 | 94800001 | 94900000 | 879  | 914  | 94850000 | -0.1287  | 0.033889151 |
| chr1 | 95250001 | 95350000 | 1051 | 1085 | 95300000 | -0.1183  | 0.04655791  |
| chr1 | 96350001 | 96450000 | 1071 | 918  | 96400000 | 0.150021 | 0.016892961 |
| chr1 | 96400001 | 96500000 | 1047 | 897  | 96450000 | 0.15071  | 0.016490636 |
| chr1 | 96600001 | 96700000 | 933  | 811  | 96650000 | 0.129803 | 0.033036925 |
| chr1 | 96650001 | 96750000 | 969  | 803  | 96700000 | 0.198725 | 0.002509509 |
| chr1 | 97100001 | 97200000 | 965  | 803  | 97150000 | 0.192757 | 0.003241248 |
| chr1 | 97150001 | 97250000 | 1036 | 825  | 97200000 | 0.256186 | 0.000155475 |

|      |          |          |      |     |           |          |             |
|------|----------|----------|------|-----|-----------|----------|-------------|
| chr1 | 97200001 | 97300000 | 1024 | 879 | 97250000  | 0.147909 | 0.01817871  |
| chr1 | 97650001 | 97750000 | 1054 | 853 | 97700000  | 0.232885 | 0.000514692 |
| chr1 | 97700001 | 97800000 | 1004 | 764 | 97750000  | 0.321743 | 3.25E-06    |
| chr1 | 98050001 | 98150000 | 1063 | 886 | 98100000  | 0.190391 | 0.003581134 |
| chr1 | 98100001 | 98200000 | 1043 | 858 | 98150000  | 0.209318 | 0.001569239 |
| chr1 | 98150001 | 98250000 | 1014 | 874 | 98200000  | 0.141981 | 0.022243641 |
| chr1 | 98200001 | 98300000 | 1053 | 920 | 98250000  | 0.122428 | 0.041465914 |
| chr1 | 98700001 | 98800000 | 960  | 842 | 98750000  | 0.116842 | 0.048950421 |
| chr1 | 99450001 | 99550000 | 1017 | 881 | 99500000  | 0.134734 | 0.028233963 |
| chr1 | 99600001 | 99700000 | 1007 | 835 | 99650000  | 0.197844 | 0.002607147 |
| chr1 | 99650001 | 99750000 | 1025 | 890 | 99700000  | 0.131375 | 0.031437644 |
| chr1 | 1E+08    | 1E+08    | 1051 | 906 | 100100000 | 0.141808 | 0.022372804 |
| chr1 | 1E+08    | 1E+08    | 1050 | 920 | 100150000 | 0.118312 | 0.046883588 |
| chr1 | 1E+08    | 1E+08    | 1016 | 824 | 100350000 | 0.229812 | 0.000598493 |
| chr1 | 1E+08    | 1E+08    | 982  | 772 | 100400000 | 0.27475  | 5.60E-05    |
| chr1 | 1E+08    | 1.01E+08 | 877  | 760 | 100450000 | 0.134206 | 0.028718995 |
| chr1 | 1.01E+08 | 1.01E+08 | 893  | 763 | 100700000 | 0.154605 | 0.014367788 |
| chr1 | 1.01E+08 | 1.01E+08 | 948  | 828 | 100750000 | 0.122885 | 0.040897625 |
| chr1 | 1.01E+08 | 1.01E+08 | 883  | 746 | 101150000 | 0.170866 | 0.007856506 |
| chr1 | 1.01E+08 | 1.01E+08 | 1029 | 861 | 101200000 | 0.184786 | 0.004517809 |
| chr1 | 1.02E+08 | 1.02E+08 | 1027 | 892 | 101950000 | 0.130949 | 0.031864797 |
| chr1 | 1.03E+08 | 1.03E+08 | 964  | 845 | 102550000 | 0.11771  | 0.047721359 |
| chr1 | 1.03E+08 | 1.03E+08 | 957  | 801 | 102600000 | 0.184345 | 0.004600116 |
| chr1 | 1.03E+08 | 1.03E+08 | 1024 | 882 | 102700000 | 0.142993 | 0.021499116 |
| chr1 | 1.03E+08 | 1.03E+08 | 952  | 835 | 102750000 | 0.116814 | 0.048991645 |
| chr1 | 1.03E+08 | 1.03E+08 | 981  | 792 | 102850000 | 0.236381 | 0.000432678 |
| chr1 | 1.03E+08 | 1.03E+08 | 895  | 722 | 102900000 | 0.237517 | 0.000408756 |
| chr1 | 1.03E+08 | 1.03E+08 | 880  | 742 | 102950000 | 0.173713 | 0.007035303 |
| chr1 | 1.03E+08 | 1.03E+08 | 995  | 826 | 1.03E+08  | 0.196183 | 0.002800604 |
| chr1 | 1.03E+08 | 1.03E+08 | 1012 | 860 | 103050000 | 0.162429 | 0.010807994 |
| chr1 | 1.03E+08 | 1.03E+08 | 982  | 815 | 103200000 | 0.196551 | 0.002756625 |
| chr1 | 1.03E+08 | 1.03E+08 | 845  | 735 | 103250000 | 0.128835 | 0.034055189 |
| chr1 | 1.03E+08 | 1.03E+08 | 904  | 761 | 103300000 | 0.176055 | 0.006417636 |
| chr1 | 1.03E+08 | 1.03E+08 | 975  | 798 | 103350000 | 0.216642 | 0.001121349 |
| chr1 | 1.03E+08 | 1.03E+08 | 1003 | 836 | 103400000 | 0.190375 | 0.003583573 |
| chr1 | 1.03E+08 | 1.04E+08 | 1030 | 876 | 103450000 | 0.16127  | 0.01128121  |
| chr1 | 1.03E+08 | 1.04E+08 | 937  | 810 | 103500000 | 0.137755 | 0.025589889 |
| chr1 | 1.04E+08 | 1.04E+08 | 975  | 804 | 103550000 | 0.205835 | 0.001835139 |
| chr1 | 1.04E+08 | 1.04E+08 | 979  | 817 | 103600000 | 0.188601 | 0.003859295 |
| chr1 | 1.04E+08 | 1.04E+08 | 814  | 692 | 103750000 | 0.161885 | 0.01102786  |
| chr1 | 1.04E+08 | 1.04E+08 | 356  | 310 | 103800000 | 0.127237 | 0.035792689 |
| chr1 | 1.04E+08 | 1.04E+08 | 69   | 47  | 103900000 | 0.481564 | 1.39E-11    |
| chr1 | 1.04E+08 | 1.04E+08 | 69   | 47  | 103950000 | 0.481564 | 1.39E-11    |
| chr1 | 1.04E+08 | 1.04E+08 | 466  | 388 | 1.04E+08  | 0.191902 | 0.003360654 |
| chr1 | 1.04E+08 | 1.04E+08 | 2    | 1   | 104250000 | 0.927628 | 7.06E-34    |
| chr1 | 1.04E+08 | 1.04E+08 | 416  | 433 | 104300000 | -0.13016 | 0.03237032  |
| chr1 | 1.05E+08 | 1.05E+08 | 1015 | 874 | 104550000 | 0.143403 | 0.021204193 |



|      |          |          |      |      |           |          |             |
|------|----------|----------|------|------|-----------|----------|-------------|
| chr1 | 1.05E+08 | 1.05E+08 | 1008 | 829  | 104600000 | 0.20968  | 0.001543726 |
| chr1 | 1.05E+08 | 1.05E+08 | 993  | 823  | 104650000 | 0.19853  | 0.00253087  |
| chr1 | 1.05E+08 | 1.05E+08 | 1023 | 875  | 104700000 | 0.153079 | 0.015169391 |
| chr1 | 1.05E+08 | 1.05E+08 | 899  | 748  | 105200000 | 0.192911 | 0.003220183 |
| chr1 | 1.05E+08 | 1.05E+08 | 866  | 752  | 105350000 | 0.131263 | 0.031549763 |
| chr1 | 1.05E+08 | 1.05E+08 | 857  | 716  | 105400000 | 0.186964 | 0.004130524 |
| chr1 | 1.06E+08 | 1.06E+08 | 1049 | 860  | 105550000 | 0.214234 | 0.00125361  |
| chr1 | 1.06E+08 | 1.06E+08 | 1023 | 841  | 105600000 | 0.210257 | 0.00150386  |
| chr1 | 1.06E+08 | 1.06E+08 | 963  | 803  | 105650000 | 0.189764 | 0.00367646  |
| chr1 | 1.06E+08 | 1.06E+08 | 936  | 789  | 105700000 | 0.174111 | 0.006926518 |
| chr1 | 1.06E+08 | 1.06E+08 | 937  | 786  | 105750000 | 0.181148 | 0.005237799 |
| chr1 | 1.06E+08 | 1.06E+08 | 928  | 770  | 105800000 | 0.196895 | 0.002716176 |
| chr1 | 1.06E+08 | 1.06E+08 | 964  | 818  | 105850000 | 0.164561 | 0.009982917 |
| chr1 | 1.06E+08 | 1.06E+08 | 1055 | 879  | 105900000 | 0.190936 | 0.003500123 |
| chr1 | 1.06E+08 | 1.06E+08 | 1038 | 891  | 105950000 | 0.147937 | 0.018160839 |
| chr1 | 1.06E+08 | 1.06E+08 | 927  | 779  | 106100000 | 0.178574 | 0.005807316 |
| chr1 | 1.06E+08 | 1.06E+08 | 965  | 747  | 106150000 | 0.297049 | 1.52E-05    |
| chr1 | 1.06E+08 | 1.06E+08 | 994  | 855  | 106200000 | 0.144495 | 0.020120627 |
| chr1 | 1.06E+08 | 1.06E+08 | 994  | 813  | 106250000 | 0.217619 | 0.001071429 |
| chr1 | 1.06E+08 | 1.06E+08 | 1005 | 800  | 106300000 | 0.256752 | 0.000150846 |
| chr1 | 1.06E+08 | 1.06E+08 | 940  | 786  | 106400000 | 0.18576  | 0.004340816 |
| chr1 | 1.06E+08 | 1.07E+08 | 906  | 770  | 106450000 | 0.162281 | 0.01086748  |
| chr1 | 1.06E+08 | 1.07E+08 | 947  | 823  | 106500000 | 0.1301   | 0.032729798 |
| chr1 | 1.07E+08 | 1.07E+08 | 1020 | 832  | 106800000 | 0.221542 | 0.000890884 |
| chr1 | 1.07E+08 | 1.07E+08 | 943  | 809  | 106850000 | 0.148746 | 0.017659164 |
| chr1 | 1.07E+08 | 1.07E+08 | 937  | 821  | 106900000 | 0.118295 | 0.046906726 |
| chr1 | 1.07E+08 | 1.07E+08 | 1046 | 892  | 106950000 | 0.157395 | 0.01299642  |
| chr1 | 1.07E+08 | 1.07E+08 | 955  | 837  | 107100000 | 0.117901 | 0.047453727 |
| chr1 | 1.08E+08 | 1.08E+08 | 990  | 833  | 107600000 | 0.17674  | 0.006246142 |
| chr1 | 1.08E+08 | 1.08E+08 | 980  | 845  | 107650000 | 0.141459 | 0.022635911 |
| chr1 | 1.08E+08 | 1.08E+08 | 1053 | 900  | 108400000 | 0.154137 | 0.014609966 |
| chr1 | 1.08E+08 | 1.09E+08 | 1084 | 941  | 108450000 | 0.131726 | 0.031088903 |
| chr1 | 1.09E+08 | 1.09E+08 | 65   | 75   | 108800000 | -0.27882 | 4.11E-05    |
| chr1 | 1.09E+08 | 1.09E+08 | 33   | 26   | 108950000 | 0.271583 | 6.70E-05    |
| chr1 | 1.09E+08 | 1.09E+08 | 979  | 836  | 109350000 | 0.155434 | 0.013947933 |
| chr1 | 1.1E+08  | 1.1E+08  | 815  | 714  | 109550000 | 0.118504 | 0.046618206 |
| chr1 | 1.1E+08  | 1.1E+08  | 787  | 666  | 109600000 | 0.16847  | 0.008612283 |
| chr1 | 1.1E+08  | 1.1E+08  | 1005 | 1057 | 110050000 | -0.14515 | 0.01973379  |
| chr1 | 1.1E+08  | 1.1E+08  | 961  | 994  | 110100000 | -0.12108 | 0.042849994 |
| chr1 | 1.1E+08  | 1.1E+08  | 727  | 750  | 110200000 | -0.11731 | 0.047950658 |
| chr1 | 1.11E+08 | 1.11E+08 | 1151 | 1196 | 110650000 | -0.1277  | 0.034970178 |
| chr1 | 1.11E+08 | 1.11E+08 | 1145 | 1201 | 110750000 | -0.14126 | 0.02252286  |
| chr1 | 1.11E+08 | 1.11E+08 | 1084 | 1132 | 110800000 | -0.13488 | 0.027813482 |
| chr1 | 1.11E+08 | 1.11E+08 | 1039 | 878  | 110900000 | 0.170531 | 0.007958511 |
| chr1 | 1.11E+08 | 1.11E+08 | 1067 | 1101 | 1.11E+08  | -0.11763 | 0.047501421 |
| chr1 | 1.11E+08 | 1.11E+08 | 1129 | 1176 | 111100000 | -0.13121 | 0.031298731 |
| chr1 | 1.11E+08 | 1.11E+08 | 1112 | 1149 | 111150000 | -0.11959 | 0.044805082 |

|      |          |          |      |      |           |          |             |
|------|----------|----------|------|------|-----------|----------|-------------|
| chr1 | 1.11E+08 | 1.11E+08 | 1004 | 837  | 111400000 | 0.190088 | 0.003626944 |
| chr1 | 1.11E+08 | 1.12E+08 | 1003 | 858  | 111450000 | 0.1529   | 0.015265998 |
| chr1 | 1.12E+08 | 1.12E+08 | 1149 | 1197 | 112400000 | -0.13142 | 0.031097939 |
| chr1 | 1.12E+08 | 1.13E+08 | 1098 | 1235 | 112450000 | -0.242   | 0.000309199 |
| chr1 | 1.12E+08 | 1.13E+08 | 1097 | 1206 | 112500000 | -0.20904 | 0.001535218 |
| chr1 | 1.13E+08 | 1.13E+08 | 970  | 1053 | 112850000 | -0.19082 | 0.003424311 |
| chr1 | 1.13E+08 | 1.13E+08 | 1009 | 1107 | 112900000 | -0.2061  | 0.001754229 |
| chr1 | 1.13E+08 | 1.13E+08 | 942  | 997  | 112950000 | -0.15424 | 0.014343238 |
| chr1 | 1.13E+08 | 1.13E+08 | 983  | 849  | 113100000 | 0.139055 | 0.024518221 |
| chr1 | 1.13E+08 | 1.13E+08 | 940  | 807  | 113150000 | 0.14772  | 0.018297482 |
| chr1 | 1.13E+08 | 1.13E+08 | 959  | 1031 | 113250000 | -0.17681 | 0.006094868 |
| chr1 | 1.13E+08 | 1.13E+08 | 877  | 936  | 113300000 | -0.1663  | 0.009180849 |
| chr1 | 1.13E+08 | 1.14E+08 | 914  | 758  | 113500000 | 0.197625 | 0.002631973 |
| chr1 | 1.14E+08 | 1.14E+08 | 816  | 705  | 113550000 | 0.138574 | 0.024910306 |
| chr1 | 1.14E+08 | 1.14E+08 | 988  | 865  | 113850000 | 0.119439 | 0.045345976 |
| chr1 | 1.14E+08 | 1.14E+08 | 968  | 842  | 113900000 | 0.128815 | 0.034076791 |
| chr1 | 1.14E+08 | 1.14E+08 | 996  | 871  | 113950000 | 0.121101 | 0.043153512 |
| chr1 | 1.14E+08 | 1.14E+08 | 1007 | 872  | 114300000 | 0.135292 | 0.027729244 |
| chr1 | 1.14E+08 | 1.14E+08 | 1043 | 845  | 114350000 | 0.231344 | 0.000555257 |
| chr1 | 1.14E+08 | 1.15E+08 | 895  | 957  | 114450000 | -0.169   | 0.008279347 |
| chr1 | 1.14E+08 | 1.15E+08 | 965  | 1023 | 114500000 | -0.15658 | 0.013181327 |
| chr1 | 1.15E+08 | 1.15E+08 | 962  | 841  | 115050000 | 0.121559 | 0.042564625 |
| chr1 | 1.15E+08 | 1.15E+08 | 897  | 769  | 115150000 | 0.149753 | 0.017051703 |
| chr1 | 1.15E+08 | 1.15E+08 | 971  | 843  | 115400000 | 0.131567 | 0.031246733 |
| chr1 | 1.15E+08 | 1.16E+08 | 956  | 768  | 115450000 | 0.243533 | 0.000301343 |
| chr1 | 1.15E+08 | 1.16E+08 | 945  | 784  | 115500000 | 0.197089 | 0.002693526 |
| chr1 | 1.16E+08 | 1.16E+08 | 1053 | 1097 | 1.16E+08  | -0.13143 | 0.03108431  |
| chr1 | 1.16E+08 | 1.16E+08 | 817  | 868  | 116150000 | -0.15973 | 0.011744251 |
| chr1 | 1.16E+08 | 1.16E+08 | 1065 | 918  | 116300000 | 0.141916 | 0.022292237 |
| chr1 | 1.16E+08 | 1.16E+08 | 1019 | 1065 | 116400000 | -0.13607 | 0.026754331 |
| chr1 | 1.16E+08 | 1.17E+08 | 982  | 1018 | 116450000 | -0.12431 | 0.038838283 |
| chr1 | 1.17E+08 | 1.17E+08 | 1083 | 1117 | 1.17E+08  | -0.11697 | 0.048432107 |
| chr1 | 1.17E+08 | 1.17E+08 | 961  | 1042 | 117050000 | -0.18912 | 0.003679645 |
| chr1 | 1.17E+08 | 1.17E+08 | 453  | 481  | 117150000 | -0.1589  | 0.012109986 |
| chr1 | 1.17E+08 | 1.17E+08 | 580  | 607  | 117200000 | -0.13802 | 0.025096844 |
| chr1 | 1.17E+08 | 1.18E+08 | 1025 | 1062 | 117500000 | -0.12353 | 0.039780256 |
| chr1 | 1.18E+08 | 1.18E+08 | 1094 | 1138 | 118150000 | -0.12926 | 0.033300097 |
| chr1 | 1.18E+08 | 1.18E+08 | 1055 | 1109 | 118200000 | -0.14439 | 0.02025659  |
| chr1 | 1.18E+08 | 1.18E+08 | 923  | 959  | 118250000 | -0.12757 | 0.035111896 |
| chr1 | 1.18E+08 | 1.18E+08 | 842  | 908  | 118300000 | -0.18124 | 0.005098089 |
| chr1 | 1.18E+08 | 1.18E+08 | 913  | 946  | 118350000 | -0.1236  | 0.039700768 |
| chr1 | 1.19E+08 | 1.19E+08 | 961  | 798  | 119150000 | 0.195776 | 0.00284996  |
| chr1 | 1.19E+08 | 1.19E+08 | 940  | 785  | 119200000 | 0.187596 | 0.004023774 |
| chr1 | 1.2E+08  | 1.2E+08  | 820  | 878  | 120050000 | -0.17097 | 0.007672849 |
| chr1 | 1.2E+08  | 1.2E+08  | 715  | 753  | 120100000 | -0.14708 | 0.018465282 |
| chr1 | 1.2E+08  | 1.2E+08  | 766  | 841  | 120150000 | -0.20713 | 0.0016742   |
| chr1 | 1.2E+08  | 1.2E+08  | 926  | 991  | 120200000 | -0.17024 | 0.007891554 |

|      |          |          |      |      |           |          |             |
|------|----------|----------|------|------|-----------|----------|-------------|
| chr1 | 1.2E+08  | 1.2E+08  | 980  | 1061 | 120250000 | -0.18694 | 0.004030996 |
| chr1 | 1.2E+08  | 1.2E+08  | 1065 | 1121 | 120300000 | -0.1463  | 0.018966092 |
| chr1 | 1.2E+08  | 1.2E+08  | 815  | 865  | 120400000 | -0.15827 | 0.012391166 |
| chr1 | 1.2E+08  | 1.21E+08 | 972  | 1042 | 120450000 | -0.1727  | 0.007171881 |
| chr1 | 1.21E+08 | 1.21E+08 | 84   | 92   | 120600000 | -0.20362 | 0.001961334 |
| chr1 | 1.21E+08 | 1.21E+08 | 33   | 23   | 120700000 | 0.44846  | 2.49E-10    |
| chr1 | 1.21E+08 | 1.21E+08 | 7    | 12   | 120750000 | -0.84998 | 3.55E-30    |
| chr1 | 1.21E+08 | 1.21E+08 | 13   | 20   | 120800000 | -0.69386 | 1.52E-21    |
| chr1 | 1.21E+08 | 1.21E+08 | 11   | 12   | 120850000 | -0.1979  | 0.002524585 |
| chr1 | 1.21E+08 | 1.21E+08 | 14   | 12   | 120900000 | 0.150021 | 0.016892961 |
| chr1 | 1.42E+08 | 1.43E+08 | 823  | 1086 | 142500000 | -0.47243 | 2.21E-11    |
| chr1 | 1.43E+08 | 1.43E+08 | 928  | 1171 | 142550000 | -0.40792 | 5.40E-09    |
| chr1 | 1.43E+08 | 1.43E+08 | 351  | 403  | 142600000 | -0.27168 | 6.19E-05    |
| chr1 | 1.43E+08 | 1.43E+08 | 354  | 418  | 142650000 | -0.31213 | 5.39E-06    |
| chr1 | 1.43E+08 | 1.43E+08 | 85   | 88   | 142750000 | -0.12241 | 0.041159296 |
| chr1 | 1.43E+08 | 1.43E+08 | 81   | 84   | 142850000 | -0.12484 | 0.038217021 |
| chr1 | 1.43E+08 | 1.43E+08 | 40   | 48   | 142900000 | -0.33541 | 1.16E-06    |
| chr1 | 1.43E+08 | 1.43E+08 | 39   | 44   | 142950000 | -0.2464  | 0.000246073 |
| chr1 | 1.43E+08 | 1.43E+08 | 8    | 10   | 1.43E+08  | -0.3943  | 1.58E-08    |
| chr1 | 1.43E+08 | 1.43E+08 | 14   | 12   | 143100000 | 0.150021 | 0.016892961 |
| chr1 | 1.43E+08 | 1.43E+08 | 40   | 34   | 143150000 | 0.162093 | 0.01094313  |
| chr1 | 1.43E+08 | 1.43E+08 | 45   | 36   | 143200000 | 0.249556 | 0.000220671 |
| chr1 | 1.43E+08 | 1.43E+08 | 75   | 89   | 143250000 | -0.31929 | 3.39E-06    |
| chr1 | 1.43E+08 | 1.43E+08 | 56   | 75   | 143300000 | -0.49384 | 3.10E-12    |
| chr1 | 1.43E+08 | 1.43E+08 | 11   | 14   | 143350000 | -0.4203  | 1.98E-09    |
| chr1 | 1.43E+08 | 1.43E+08 | 59   | 63   | 143400000 | -0.16701 | 0.008937407 |
| chr1 | 1.43E+08 | 1.44E+08 | 102  | 110  | 143450000 | -0.18131 | 0.005085174 |
| chr1 | 1.44E+08 | 1.44E+08 | 4    | 6    | 143650000 | -0.65733 | 1.11E-19    |
| chr1 | 1.44E+08 | 1.44E+08 | 9    | 7    | 143700000 | 0.290198 | 2.29E-05    |
| chr1 | 1.44E+08 | 1.44E+08 | 7    | 8    | 143750000 | -0.26502 | 9.01E-05    |
| chr1 | 1.44E+08 | 1.44E+08 | 2    | 7    | 143800000 | -1.87973 | 1.93E-94    |
| chr1 | 1.44E+08 | 1.44E+08 | 22   | 30   | 143950000 | -0.51983 | 2.59E-13    |
| chr1 | 1.44E+08 | 1.44E+08 | 385  | 426  | 1.44E+08  | -0.21837 | 0.000994935 |
| chr1 | 1.44E+08 | 1.44E+08 | 387  | 428  | 144050000 | -0.21765 | 0.001029268 |
| chr1 | 1.44E+08 | 1.44E+08 | 15   | 21   | 144100000 | -0.5578  | 5.82E-15    |
| chr1 | 1.44E+08 | 1.44E+08 | 0    | 1    | 144200000 | #NAME?   | 1.59E-189   |
| chr1 | 1.44E+08 | 1.44E+08 | 0    | 1    | 144250000 | #NAME?   | 1.59E-189   |
| chr1 | 1.44E+08 | 1.44E+08 | 3    | 1    | 144350000 | 1.512591 | 1.57E-69    |
| chr1 | 1.44E+08 | 1.45E+08 | 232  | 252  | 144500000 | -0.19167 | 0.003302837 |
| chr1 | 1.45E+08 | 1.45E+08 | 272  | 305  | 144550000 | -0.23757 | 0.000387852 |
| chr1 | 1.45E+08 | 1.45E+08 | 51   | 69   | 144600000 | -0.50847 | 7.76E-13    |
| chr1 | 1.45E+08 | 1.45E+08 | 26   | 35   | 144650000 | -0.50122 | 1.55E-12    |
| chr1 | 1.45E+08 | 1.45E+08 | 18   | 23   | 144700000 | -0.42601 | 1.24E-09    |
| chr1 | 1.45E+08 | 1.45E+08 | 1    | 2    | 144750000 | -1.07237 | 8.26E-44    |
| chr1 | 1.45E+08 | 1.45E+08 | 33   | 36   | 144800000 | -0.1979  | 0.002524585 |
| chr1 | 1.45E+08 | 1.45E+08 | 529  | 564  | 144850000 | -0.1648  | 0.009719662 |
| chr1 | 1.45E+08 | 1.45E+08 | 99   | 103  | 145200000 | -0.12952 | 0.033032037 |

|      |          |          |      |     |           |          |             |
|------|----------|----------|------|-----|-----------|----------|-------------|
| chr1 | 1.46E+08 | 1.46E+08 | 846  | 873 | 145700000 | -0.1177  | 0.047403738 |
| chr1 | 1.46E+08 | 1.46E+08 | 442  | 499 | 145750000 | -0.24737 | 0.000233947 |
| chr1 | 1.46E+08 | 1.46E+08 | 44   | 55  | 145800000 | -0.3943  | 1.58E-08    |
| chr1 | 1.46E+08 | 1.46E+08 | 24   | 31  | 145850000 | -0.44161 | 3.32E-10    |
| chr1 | 1.46E+08 | 1.46E+08 | 2    | 8   | 145950000 | -2.07237 | 5.62E-105   |
| chr1 | 1.46E+08 | 1.46E+08 | 2    | 11  | 1.46E+08  | -2.5318  | 1.77E-126   |
| chr1 | 1.46E+08 | 1.46E+08 | 0    | 3   | 146050000 | #NAME?   | 1.59E-189   |
| chr1 | 1.46E+08 | 1.46E+08 | 1    | 3   | 146200000 | -1.65733 | 2.87E-81    |
| chr1 | 1.46E+08 | 1.46E+08 | 1    | 3   | 146250000 | -1.65733 | 2.87E-81    |
| chr1 | 1.46E+08 | 1.46E+08 | 46   | 40  | 146300000 | 0.129262 | 0.033603145 |
| chr1 | 1.46E+08 | 1.46E+08 | 24   | 25  | 146400000 | -0.13127 | 0.031247765 |
| chr1 | 1.46E+08 | 1.47E+08 | 49   | 64  | 146450000 | -0.45766 | 8.25E-11    |
| chr1 | 1.46E+08 | 1.47E+08 | 319  | 333 | 146500000 | -0.13434 | 0.028308622 |
| chr1 | 1.47E+08 | 1.47E+08 | 851  | 738 | 146750000 | 0.133167 | 0.029693242 |
| chr1 | 1.47E+08 | 1.47E+08 | 791  | 685 | 146800000 | 0.135202 | 0.027810096 |
| chr1 | 1.47E+08 | 1.47E+08 | 1070 | 920 | 1.47E+08  | 0.145533 | 0.019724254 |
| chr1 | 1.47E+08 | 1.47E+08 | 488  | 508 | 147400000 | -0.13032 | 0.032202574 |
| chr1 | 1.47E+08 | 1.48E+08 | 19   | 16  | 147450000 | 0.175556 | 0.006544999 |
| chr1 | 1.48E+08 | 1.48E+08 | 476  | 498 | 147800000 | -0.13756 | 0.025480536 |
| chr1 | 1.48E+08 | 1.48E+08 | 215  | 255 | 147850000 | -0.31853 | 3.56E-06    |
| chr1 | 1.48E+08 | 1.48E+08 | 3    | 4   | 147900000 | -0.48741 | 5.63E-12    |
| chr1 | 1.48E+08 | 1.48E+08 | 4    | 6   | 147950000 | -0.65733 | 1.11E-19    |
| chr1 | 1.48E+08 | 1.48E+08 | 13   | 8   | 1.48E+08  | 0.628068 | 6.65E-18    |
| chr1 | 1.48E+08 | 1.48E+08 | 11   | 4   | 148050000 | 1.38706  | 6.82E-62    |
| chr1 | 1.48E+08 | 1.48E+08 | 17   | 18  | 148200000 | -0.15483 | 0.014039201 |
| chr1 | 1.48E+08 | 1.48E+08 | 8    | 12  | 148250000 | -0.65733 | 1.11E-19    |
| chr1 | 1.48E+08 | 1.48E+08 | 2    | 6   | 148300000 | -1.65733 | 2.87E-81    |
| chr1 | 1.48E+08 | 1.48E+08 | 7    | 9   | 148350000 | -0.43494 | 5.85E-10    |
| chr1 | 1.49E+08 | 1.49E+08 | 14   | 17  | 148650000 | -0.35248 | 3.55E-07    |
| chr1 | 1.49E+08 | 1.49E+08 | 8    | 14  | 148700000 | -0.87973 | 6.33E-32    |
| chr1 | 1.49E+08 | 1.49E+08 | 3    | 2   | 148750000 | 0.512591 | 8.10E-13    |
| chr1 | 1.49E+08 | 1.49E+08 | 22   | 31  | 148800000 | -0.56714 | 2.22E-15    |
| chr1 | 1.49E+08 | 1.49E+08 | 93   | 116 | 148850000 | -0.39119 | 2.01E-08    |
| chr1 | 1.49E+08 | 1.49E+08 | 138  | 164 | 148900000 | -0.3214  | 2.96E-06    |
| chr1 | 1.49E+08 | 1.49E+08 | 67   | 87  | 148950000 | -0.44923 | 1.72E-10    |
| chr1 | 1.49E+08 | 1.49E+08 | 504  | 440 | 149050000 | 0.123548 | 0.040082672 |
| chr1 | 1.49E+08 | 1.49E+08 | 452  | 474 | 149250000 | -0.14094 | 0.02276962  |
| chr1 | 1.49E+08 | 1.49E+08 | 82   | 96  | 149300000 | -0.29978 | 1.17E-05    |
| chr1 | 1.49E+08 | 1.49E+08 | 49   | 65  | 149350000 | -0.48003 | 1.11E-11    |
| chr1 | 1.49E+08 | 1.49E+08 | 21   | 25  | 149400000 | -0.32391 | 2.51E-06    |
| chr1 | 1.5E+08  | 1.5E+08  | 9    | 4   | 149550000 | 1.097553 | 4.83E-44    |
| chr1 | 1.5E+08  | 1.5E+08  | 10   | 6   | 149600000 | 0.664594 | 1.17E-19    |
| chr1 | 1.5E+08  | 1.5E+08  | 34   | 36  | 149650000 | -0.15483 | 0.014039201 |
| chr1 | 1.5E+08  | 1.5E+08  | 979  | 852 | 1.50E+08  | 0.128084 | 0.034863565 |
| chr1 | 1.5E+08  | 1.5E+08  | 960  | 815 | 150050000 | 0.163863 | 0.010246788 |
| chr1 | 1.5E+08  | 1.5E+08  | 829  | 903 | 150250000 | -0.19573 | 0.002775223 |
| chr1 | 1.5E+08  | 1.5E+08  | 857  | 750 | 150400000 | 0.120033 | 0.044552734 |

|      |          |          |      |      |           |          |             |
|------|----------|----------|------|------|-----------|----------|-------------|
| chr1 | 1.5E+08  | 1.51E+08 | 913  | 758  | 150450000 | 0.196045 | 0.002817217 |
| chr1 | 1.51E+08 | 1.51E+08 | 782  | 817  | 150550000 | -0.13554 | 0.027223434 |
| chr1 | 1.51E+08 | 1.51E+08 | 889  | 769  | 150800000 | 0.136828 | 0.026378329 |
| chr1 | 1.51E+08 | 1.51E+08 | 956  | 831  | 151150000 | 0.12979  | 0.033050456 |
| chr1 | 1.51E+08 | 1.51E+08 | 820  | 717  | 151200000 | 0.121279 | 0.042924198 |
| chr1 | 1.51E+08 | 1.51E+08 | 966  | 836  | 151250000 | 0.136148 | 0.026968981 |
| chr1 | 1.51E+08 | 1.51E+08 | 864  | 902  | 151350000 | -0.13447 | 0.028189177 |
| chr1 | 1.51E+08 | 1.51E+08 | 853  | 896  | 151400000 | -0.14332 | 0.021004297 |
| chr1 | 1.51E+08 | 1.52E+08 | 829  | 869  | 151450000 | -0.14036 | 0.023216848 |
| chr1 | 1.52E+08 | 1.52E+08 | 956  | 995  | 151950000 | -0.13006 | 0.032470571 |
| chr1 | 1.52E+08 | 1.53E+08 | 910  | 990  | 152450000 | -0.19393 | 0.002998184 |
| chr1 | 1.53E+08 | 1.53E+08 | 1021 | 889  | 1.53E+08  | 0.127356 | 0.035661377 |
| chr1 | 1.53E+08 | 1.53E+08 | 936  | 1052 | 153300000 | -0.24093 | 0.000326847 |
| chr1 | 1.53E+08 | 1.53E+08 | 871  | 1037 | 153350000 | -0.32404 | 2.48E-06    |
| chr1 | 1.54E+08 | 1.54E+08 | 934  | 987  | 153550000 | -0.152   | 0.015537279 |
| chr1 | 1.54E+08 | 1.54E+08 | 835  | 878  | 153650000 | -0.14482 | 0.019961835 |
| chr1 | 1.54E+08 | 1.54E+08 | 856  | 945  | 153700000 | -0.21508 | 0.001161532 |
| chr1 | 1.54E+08 | 1.54E+08 | 832  | 717  | 154100000 | 0.142239 | 0.02205196  |
| chr1 | 1.54E+08 | 1.54E+08 | 739  | 766  | 154300000 | -0.12414 | 0.03904441  |
| chr1 | 1.54E+08 | 1.54E+08 | 862  | 898  | 154350000 | -0.1314  | 0.031114595 |
| chr1 | 1.54E+08 | 1.55E+08 | 982  | 1061 | 154500000 | -0.184   | 0.004553725 |
| chr1 | 1.55E+08 | 1.55E+08 | 1022 | 1056 | 154550000 | -0.11959 | 0.044814947 |
| chr1 | 1.55E+08 | 1.55E+08 | 1142 | 1178 | 154750000 | -0.11715 | 0.048174866 |
| chr1 | 1.55E+08 | 1.55E+08 | 1133 | 1217 | 154800000 | -0.17555 | 0.006408396 |
| chr1 | 1.55E+08 | 1.55E+08 | 1068 | 1143 | 154850000 | -0.17029 | 0.007879059 |
| chr1 | 1.55E+08 | 1.55E+08 | 973  | 1095 | 154900000 | -0.24279 | 0.000296903 |
| chr1 | 1.55E+08 | 1.55E+08 | 908  | 1113 | 154950000 | -0.36606 | 1.33E-07    |
| chr1 | 1.55E+08 | 1.55E+08 | 953  | 1093 | 1.55E+08  | -0.27012 | 6.77E-05    |
| chr1 | 1.55E+08 | 1.55E+08 | 994  | 1113 | 155050000 | -0.23551 | 0.000430588 |
| chr1 | 1.55E+08 | 1.55E+08 | 898  | 995  | 155100000 | -0.22035 | 0.00090535  |
| chr1 | 1.55E+08 | 1.55E+08 | 875  | 929  | 155150000 | -0.15877 | 0.012168057 |
| chr1 | 1.55E+08 | 1.55E+08 | 823  | 701  | 155350000 | 0.159106 | 0.012212972 |
| chr1 | 1.56E+08 | 1.56E+08 | 644  | 666  | 155650000 | -0.12083 | 0.043170996 |
| chr1 | 1.56E+08 | 1.56E+08 | 588  | 650  | 155700000 | -0.217   | 0.00106148  |
| chr1 | 1.56E+08 | 1.56E+08 | 927  | 980  | 156050000 | -0.15258 | 0.015217383 |
| chr1 | 1.56E+08 | 1.56E+08 | 943  | 998  | 156100000 | -0.15415 | 0.01438677  |
| chr1 | 1.56E+08 | 1.56E+08 | 1182 | 1270 | 156150000 | -0.17597 | 0.006303071 |
| chr1 | 1.56E+08 | 1.56E+08 | 1242 | 1312 | 156200000 | -0.15147 | 0.01582933  |
| chr1 | 1.56E+08 | 1.56E+08 | 981  | 1051 | 156350000 | -0.17181 | 0.007425703 |
| chr1 | 1.56E+08 | 1.56E+08 | 1054 | 1098 | 156400000 | -0.13137 | 0.031138818 |
| chr1 | 1.56E+08 | 1.57E+08 | 1041 | 1076 | 156500000 | -0.12008 | 0.044158505 |
| chr1 | 1.57E+08 | 1.57E+08 | 1055 | 1115 | 156600000 | -0.15217 | 0.015441963 |
| chr1 | 1.57E+08 | 1.57E+08 | 1064 | 1130 | 156650000 | -0.1592  | 0.011977701 |
| chr1 | 1.57E+08 | 1.57E+08 | 898  | 975  | 156750000 | -0.19106 | 0.003389906 |
| chr1 | 1.57E+08 | 1.57E+08 | 1019 | 1154 | 156800000 | -0.25186 | 0.000184426 |
| chr1 | 1.57E+08 | 1.57E+08 | 1093 | 1295 | 156850000 | -0.31703 | 3.93E-06    |
| chr1 | 1.57E+08 | 1.57E+08 | 1120 | 1206 | 156900000 | -0.1791  | 0.00555999  |

|      |          |          |      |      |           |          |             |
|------|----------|----------|------|------|-----------|----------|-------------|
| chr1 | 1.57E+08 | 1.57E+08 | 991  | 1028 | 157150000 | -0.12526 | 0.037730475 |
| chr1 | 1.58E+08 | 1.58E+08 | 1013 | 885  | 157550000 | 0.122513 | 0.041359464 |
| chr1 | 1.58E+08 | 1.58E+08 | 1028 | 895  | 157700000 | 0.127509 | 0.035492295 |
| chr1 | 1.58E+08 | 1.58E+08 | 987  | 1021 | 157900000 | -0.12123 | 0.042654854 |
| chr1 | 1.58E+08 | 1.58E+08 | 1098 | 1167 | 158050000 | -0.1603  | 0.011500641 |
| chr1 | 1.58E+08 | 1.58E+08 | 1030 | 1112 | 158100000 | -0.18288 | 0.004767675 |
| chr1 | 1.58E+08 | 1.58E+08 | 868  | 909  | 158150000 | -0.13896 | 0.024325625 |
| chr1 | 1.58E+08 | 1.58E+08 | 728  | 751  | 158200000 | -0.11725 | 0.048036613 |
| chr1 | 1.59E+08 | 1.59E+08 | 1078 | 932  | 158700000 | 0.137584 | 0.025734465 |
| chr1 | 1.59E+08 | 1.59E+08 | 1046 | 1116 | 159150000 | -0.16583 | 0.00934898  |
| chr1 | 1.59E+08 | 1.59E+08 | 1016 | 1048 | 159200000 | -0.11711 | 0.048229612 |
| chr1 | 1.59E+08 | 1.59E+08 | 952  | 816  | 159300000 | 0.150021 | 0.016892961 |
| chr1 | 1.59E+08 | 1.59E+08 | 966  | 814  | 159350000 | 0.174623 | 0.006789294 |
| chr1 | 1.59E+08 | 1.59E+08 | 978  | 832  | 159400000 | 0.160879 | 0.011444701 |
| chr1 | 1.6E+08  | 1.6E+08  | 1146 | 1211 | 160050000 | -0.15196 | 0.015556998 |
| chr1 | 1.6E+08  | 1.6E+08  | 1157 | 1232 | 160100000 | -0.16299 | 0.010406122 |
| chr1 | 1.61E+08 | 1.61E+08 | 830  | 858  | 1.61E+08  | -0.12024 | 0.043949534 |
| chr1 | 1.61E+08 | 1.61E+08 | 828  | 858  | 161250000 | -0.12372 | 0.039553521 |
| chr1 | 1.61E+08 | 1.61E+08 | 481  | 496  | 161400000 | -0.11667 | 0.048850577 |
| chr1 | 1.62E+08 | 1.62E+08 | 1096 | 1153 | 161950000 | -0.14552 | 0.019488054 |
| chr1 | 1.62E+08 | 1.62E+08 | 1062 | 1197 | 1.62E+08  | -0.24501 | 0.000264595 |
| chr1 | 1.62E+08 | 1.62E+08 | 1081 | 928  | 162100000 | 0.147798 | 0.018248441 |
| chr1 | 1.63E+08 | 1.63E+08 | 640  | 674  | 162800000 | -0.14705 | 0.018484446 |
| chr1 | 1.64E+08 | 1.64E+08 | 986  | 865  | 163700000 | 0.116516 | 0.049419683 |
| chr1 | 1.64E+08 | 1.64E+08 | 1051 | 887  | 163750000 | 0.172385 | 0.007408365 |
| chr1 | 1.64E+08 | 1.64E+08 | 1075 | 943  | 163850000 | 0.116635 | 0.049247642 |
| chr1 | 1.64E+08 | 1.64E+08 | 1140 | 956  | 163900000 | 0.18158  | 0.005147344 |
| chr1 | 1.65E+08 | 1.65E+08 | 1069 | 936  | 164600000 | 0.11931  | 0.045520495 |
| chr1 | 1.65E+08 | 1.65E+08 | 1140 | 1000 | 164650000 | 0.116662 | 0.049209057 |
| chr1 | 1.65E+08 | 1.65E+08 | 1073 | 1132 | 165300000 | -0.1496  | 0.016913408 |
| chr1 | 1.65E+08 | 1.65E+08 | 1077 | 1144 | 165350000 | -0.15944 | 0.011870525 |
| chr1 | 1.66E+08 | 1.66E+08 | 974  | 1004 | 166050000 | -0.11614 | 0.049626725 |
| chr1 | 1.66E+08 | 1.66E+08 | 992  | 853  | 166150000 | 0.145423 | 0.019798892 |
| chr1 | 1.66E+08 | 1.66E+08 | 907  | 768  | 166400000 | 0.167624 | 0.00889373  |
| chr1 | 1.66E+08 | 1.67E+08 | 971  | 811  | 166450000 | 0.187398 | 0.004057044 |
| chr1 | 1.67E+08 | 1.67E+08 | 1038 | 876  | 167150000 | 0.172432 | 0.007394862 |
| chr1 | 1.67E+08 | 1.67E+08 | 1073 | 912  | 167350000 | 0.162173 | 0.010911137 |
| chr1 | 1.67E+08 | 1.68E+08 | 1052 | 1101 | 167450000 | -0.13805 | 0.025066863 |
| chr1 | 1.68E+08 | 1.68E+08 | 960  | 1000 | 167550000 | -0.13127 | 0.031247765 |
| chr1 | 1.68E+08 | 1.68E+08 | 858  | 888  | 167850000 | -0.12195 | 0.041735557 |
| chr1 | 1.68E+08 | 1.68E+08 | 925  | 799  | 168150000 | 0.138886 | 0.024655393 |
| chr1 | 1.68E+08 | 1.68E+08 | 926  | 973  | 168350000 | -0.1438  | 0.020667725 |
| chr1 | 1.68E+08 | 1.68E+08 | 1031 | 1065 | 168400000 | -0.11918 | 0.045360407 |
| chr1 | 1.69E+08 | 1.69E+08 | 892  | 930  | 168950000 | -0.13256 | 0.029980939 |
| chr1 | 1.69E+08 | 1.69E+08 | 935  | 965  | 1.69E+08  | -0.11793 | 0.047070574 |
| chr1 | 1.69E+08 | 1.69E+08 | 734  | 624  | 169250000 | 0.161862 | 0.011037129 |
| chr1 | 1.69E+08 | 1.69E+08 | 1019 | 884  | 169300000 | 0.132664 | 0.030174197 |

|      |          |          |      |      |           |          |             |
|------|----------|----------|------|------|-----------|----------|-------------|
| chr1 | 1.7E+08  | 1.7E+08  | 1033 | 1079 | 169550000 | -0.13523 | 0.027502552 |
| chr1 | 1.7E+08  | 1.7E+08  | 1040 | 911  | 169900000 | 0.118689 | 0.046364775 |
| chr1 | 1.7E+08  | 1.7E+08  | 1014 | 888  | 169950000 | 0.119054 | 0.045866222 |
| chr1 | 1.7E+08  | 1.7E+08  | 927  | 805  | 1.70E+08  | 0.131209 | 0.031603598 |
| chr1 | 1.7E+08  | 1.7E+08  | 925  | 792  | 170100000 | 0.151581 | 0.015993717 |
| chr1 | 1.7E+08  | 1.7E+08  | 905  | 782  | 170400000 | 0.138377 | 0.025072177 |
| chr1 | 1.72E+08 | 1.72E+08 | 911  | 799  | 171550000 | 0.116884 | 0.048891235 |
| chr1 | 1.72E+08 | 1.72E+08 | 1072 | 912  | 171950000 | 0.160827 | 0.011466519 |
| chr1 | 1.72E+08 | 1.72E+08 | 1099 | 955  | 172100000 | 0.130247 | 0.032578829 |
| chr1 | 1.72E+08 | 1.72E+08 | 1055 | 924  | 172150000 | 0.118906 | 0.04606734  |
| chr1 | 1.73E+08 | 1.73E+08 | 1103 | 954  | 172900000 | 0.137    | 0.026230741 |
| chr1 | 1.73E+08 | 1.73E+08 | 996  | 841  | 172950000 | 0.171668 | 0.007616938 |
| chr1 | 1.73E+08 | 1.73E+08 | 895  | 768  | 1.73E+08  | 0.14841  | 0.017866505 |
| chr1 | 1.73E+08 | 1.73E+08 | 970  | 850  | 173050000 | 0.11815  | 0.047107474 |
| chr1 | 1.74E+08 | 1.74E+08 | 902  | 783  | 173900000 | 0.131743 | 0.031072119 |
| chr1 | 1.74E+08 | 1.75E+08 | 996  | 856  | 174450000 | 0.146163 | 0.019303908 |
| chr1 | 1.74E+08 | 1.75E+08 | 931  | 807  | 174500000 | 0.133841 | 0.029058062 |
| chr1 | 1.75E+08 | 1.75E+08 | 779  | 637  | 174550000 | 0.217958 | 0.00105457  |
| chr1 | 1.75E+08 | 1.75E+08 | 688  | 573  | 174600000 | 0.191502 | 0.003417805 |
| chr1 | 1.75E+08 | 1.75E+08 | 805  | 846  | 174800000 | -0.14404 | 0.020498395 |
| chr1 | 1.75E+08 | 1.75E+08 | 977  | 1046 | 175100000 | -0.17082 | 0.007716101 |
| chr1 | 1.76E+08 | 1.76E+08 | 1138 | 1236 | 175650000 | -0.19155 | 0.003319849 |
| chr1 | 1.76E+08 | 1.76E+08 | 1124 | 1159 | 175700000 | -0.11661 | 0.048943456 |
| chr1 | 1.77E+08 | 1.77E+08 | 1137 | 981  | 176550000 | 0.140535 | 0.023343919 |
| chr1 | 1.77E+08 | 1.77E+08 | 1081 | 903  | 176600000 | 0.187197 | 0.004090904 |
| chr1 | 1.77E+08 | 1.77E+08 | 1043 | 914  | 176650000 | 0.118101 | 0.047175255 |
| chr1 | 1.77E+08 | 1.77E+08 | 1066 | 902  | 176700000 | 0.168636 | 0.008557728 |
| chr1 | 1.77E+08 | 1.77E+08 | 1095 | 1134 | 176800000 | -0.12286 | 0.040601336 |
| chr1 | 1.77E+08 | 1.77E+08 | 1096 | 1187 | 176850000 | -0.18744 | 0.00394751  |
| chr1 | 1.77E+08 | 1.77E+08 | 1097 | 1149 | 176900000 | -0.13919 | 0.024140295 |
| chr1 | 1.77E+08 | 1.77E+08 | 1109 | 1192 | 176950000 | -0.1765  | 0.006172355 |
| chr1 | 1.77E+08 | 1.77E+08 | 1080 | 1127 | 1.77E+08  | -0.13383 | 0.028779535 |
| chr1 | 1.77E+08 | 1.77E+08 | 1004 | 1063 | 177150000 | -0.15475 | 0.014079619 |
| chr1 | 1.78E+08 | 1.78E+08 | 1077 | 1124 | 177900000 | -0.134   | 0.028623944 |
| chr1 | 1.78E+08 | 1.78E+08 | 929  | 999  | 177950000 | -0.17718 | 0.006006775 |
| chr1 | 1.78E+08 | 1.78E+08 | 1003 | 862  | 178050000 | 0.14619  | 0.019286138 |
| chr1 | 1.78E+08 | 1.78E+08 | 980  | 821  | 178100000 | 0.183028 | 0.004853907 |
| chr1 | 1.78E+08 | 1.78E+08 | 1004 | 855  | 178150000 | 0.159391 | 0.012086545 |
| chr1 | 1.78E+08 | 1.78E+08 | 992  | 860  | 178350000 | 0.133632 | 0.02925378  |
| chr1 | 1.79E+08 | 1.79E+08 | 978  | 829  | 178800000 | 0.166091 | 0.0094252   |
| chr1 | 1.79E+08 | 1.79E+08 | 820  | 705  | 179350000 | 0.145629 | 0.019659947 |
| chr1 | 1.79E+08 | 1.79E+08 | 747  | 635  | 179400000 | 0.16198  | 0.010989226 |
| chr1 | 1.8E+08  | 1.8E+08  | 966  | 847  | 1.80E+08  | 0.117289 | 0.048314014 |
| chr1 | 1.81E+08 | 1.81E+08 | 939  | 797  | 180650000 | 0.164174 | 0.010128433 |
| chr1 | 1.81E+08 | 1.81E+08 | 892  | 782  | 180700000 | 0.117503 | 0.048011893 |
| chr1 | 1.81E+08 | 1.81E+08 | 962  | 830  | 180750000 | 0.140554 | 0.02332967  |
| chr1 | 1.81E+08 | 1.81E+08 | 959  | 804  | 180800000 | 0.181964 | 0.005068031 |

|      |          |          |      |      |           |          |             |
|------|----------|----------|------|------|-----------|----------|-------------|
| chr1 | 1.82E+08 | 1.82E+08 | 959  | 1042 | 182050000 | -0.19212 | 0.003239621 |
| chr1 | 1.82E+08 | 1.82E+08 | 938  | 969  | 182300000 | -0.11928 | 0.045225889 |
| chr1 | 1.84E+08 | 1.84E+08 | 969  | 1001 | 184050000 | -0.11925 | 0.045273559 |
| chr1 | 1.85E+08 | 1.85E+08 | 877  | 727  | 185200000 | 0.19825  | 0.002561748 |
| chr1 | 1.85E+08 | 1.85E+08 | 974  | 832  | 185250000 | 0.154966 | 0.014183524 |
| chr1 | 1.85E+08 | 1.85E+08 | 973  | 841  | 185350000 | 0.137962 | 0.025416733 |
| chr1 | 1.86E+08 | 1.86E+08 | 831  | 890  | 185600000 | -0.17133 | 0.007566179 |
| chr1 | 1.86E+08 | 1.86E+08 | 967  | 805  | 185900000 | 0.192155 | 0.003324828 |
| chr1 | 1.86E+08 | 1.86E+08 | 990  | 826  | 186200000 | 0.188915 | 0.003809149 |
| chr1 | 1.86E+08 | 1.86E+08 | 990  | 847  | 186250000 | 0.152695 | 0.015377453 |
| chr1 | 1.86E+08 | 1.86E+08 | 1029 | 887  | 186350000 | 0.141865 | 0.022329923 |
| chr1 | 1.86E+08 | 1.86E+08 | 1046 | 877  | 186400000 | 0.181862 | 0.005088828 |
| chr1 | 1.87E+08 | 1.87E+08 | 950  | 826  | 186600000 | 0.129414 | 0.033443481 |
| chr1 | 1.87E+08 | 1.87E+08 | 943  | 766  | 186650000 | 0.227542 | 0.000668357 |
| chr1 | 1.87E+08 | 1.87E+08 | 1017 | 877  | 186700000 | 0.141299 | 0.022756901 |
| chr1 | 1.87E+08 | 1.87E+08 | 1026 | 838  | 186900000 | 0.219637 | 0.00097473  |
| chr1 | 1.87E+08 | 1.87E+08 | 1002 | 859  | 187250000 | 0.149781 | 0.01703501  |
| chr1 | 1.87E+08 | 1.87E+08 | 932  | 812  | 187300000 | 0.126478 | 0.036642867 |
| chr1 | 1.87E+08 | 1.87E+08 | 974  | 813  | 187350000 | 0.188295 | 0.003908798 |
| chr1 | 1.87E+08 | 1.87E+08 | 1080 | 901  | 187400000 | 0.189061 | 0.0037861   |
| chr1 | 1.88E+08 | 1.88E+08 | 1004 | 855  | 187650000 | 0.159391 | 0.012086545 |
| chr1 | 1.88E+08 | 1.88E+08 | 939  | 802  | 187700000 | 0.155151 | 0.014090085 |
| chr1 | 1.88E+08 | 1.88E+08 | 851  | 742  | 187750000 | 0.125368 | 0.037916671 |
| chr1 | 1.88E+08 | 1.88E+08 | 878  | 769  | 187800000 | 0.118866 | 0.04612311  |
| chr1 | 1.88E+08 | 1.88E+08 | 1001 | 862  | 188150000 | 0.14331  | 0.021270415 |
| chr1 | 1.88E+08 | 1.88E+08 | 925  | 780  | 188200000 | 0.173607 | 0.007064216 |
| chr1 | 1.88E+08 | 1.88E+08 | 1034 | 889  | 188350000 | 0.145609 | 0.019673242 |
| chr1 | 1.88E+08 | 1.88E+08 | 1055 | 892  | 188400000 | 0.169756 | 0.008199119 |
| chr1 | 1.88E+08 | 1.89E+08 | 990  | 861  | 188500000 | 0.129044 | 0.03383404  |
| chr1 | 1.89E+08 | 1.89E+08 | 990  | 850  | 188600000 | 0.147594 | 0.01837747  |
| chr1 | 1.89E+08 | 1.89E+08 | 906  | 751  | 188750000 | 0.198326 | 0.002553254 |
| chr1 | 1.89E+08 | 1.89E+08 | 954  | 738  | 188800000 | 0.297997 | 1.44E-05    |
| chr1 | 1.89E+08 | 1.89E+08 | 1019 | 793  | 188850000 | 0.28939  | 2.40E-05    |
| chr1 | 1.89E+08 | 1.89E+08 | 1016 | 874  | 188900000 | 0.144823 | 0.020207236 |
| chr1 | 1.89E+08 | 1.89E+08 | 980  | 842  | 188950000 | 0.14659  | 0.019023614 |
| chr1 | 1.89E+08 | 1.89E+08 | 975  | 806  | 1.89E+08  | 0.202251 | 0.002151139 |
| chr1 | 1.89E+08 | 1.89E+08 | 972  | 822  | 189050000 | 0.169446 | 0.008296919 |
| chr1 | 1.89E+08 | 1.89E+08 | 964  | 810  | 189100000 | 0.178739 | 0.005769163 |
| chr1 | 1.89E+08 | 1.89E+08 | 934  | 775  | 189150000 | 0.196854 | 0.002720874 |
| chr1 | 1.89E+08 | 1.89E+08 | 963  | 797  | 189200000 | 0.200584 | 0.002314268 |
| chr1 | 1.89E+08 | 1.89E+08 | 945  | 820  | 189250000 | 0.132319 | 0.030508465 |
| chr1 | 1.9E+08  | 1.9E+08  | 1022 | 865  | 189550000 | 0.168251 | 0.008684213 |
| chr1 | 1.9E+08  | 1.9E+08  | 971  | 812  | 189750000 | 0.18562  | 0.004365856 |
| chr1 | 1.9E+08  | 1.9E+08  | 1021 | 871  | 189800000 | 0.156866 | 0.013247341 |
| chr1 | 1.9E+08  | 1.9E+08  | 1036 | 892  | 189850000 | 0.143537 | 0.021108519 |
| chr1 | 1.9E+08  | 1.9E+08  | 1056 | 905  | 189900000 | 0.150248 | 0.016759095 |
| chr1 | 1.9E+08  | 1.9E+08  | 1090 | 882  | 190150000 | 0.233106 | 0.000509123 |



|      |          |          |      |     |           |          |             |
|------|----------|----------|------|-----|-----------|----------|-------------|
| chr1 | 1.9E+08  | 1.9E+08  | 978  | 805 | 190200000 | 0.208474 | 0.001630217 |
| chr1 | 1.9E+08  | 1.9E+08  | 926  | 809 | 190250000 | 0.122501 | 0.041374857 |
| chr1 | 1.9E+08  | 1.9E+08  | 1010 | 874 | 190300000 | 0.136278 | 0.026855263 |
| chr1 | 1.9E+08  | 1.9E+08  | 1031 | 865 | 190350000 | 0.180901 | 0.005290301 |
| chr1 | 1.9E+08  | 1.91E+08 | 1037 | 907 | 190500000 | 0.12087  | 0.043453738 |
| chr1 | 1.91E+08 | 1.91E+08 | 987  | 827 | 190600000 | 0.182791 | 0.004900834 |
| chr1 | 1.91E+08 | 1.91E+08 | 1025 | 851 | 190650000 | 0.196021 | 0.002820138 |
| chr1 | 1.91E+08 | 1.91E+08 | 995  | 835 | 190700000 | 0.180549 | 0.005365789 |
| chr1 | 1.91E+08 | 1.91E+08 | 998  | 872 | 190750000 | 0.12234  | 0.041576156 |
| chr1 | 1.91E+08 | 1.91E+08 | 982  | 844 | 190950000 | 0.146108 | 0.01934025  |
| chr1 | 1.91E+08 | 1.91E+08 | 922  | 774 | 1.91E+08  | 0.180061 | 0.005471855 |
| chr1 | 1.91E+08 | 1.91E+08 | 946  | 803 | 191050000 | 0.164068 | 0.010168337 |
| chr1 | 1.91E+08 | 1.91E+08 | 1042 | 906 | 191100000 | 0.129401 | 0.033457553 |
| chr1 | 1.91E+08 | 1.91E+08 | 977  | 850 | 191200000 | 0.128524 | 0.034388156 |
| chr1 | 1.91E+08 | 1.91E+08 | 1028 | 871 | 191250000 | 0.166724 | 0.009202489 |
| chr1 | 1.91E+08 | 1.91E+08 | 1031 | 902 | 191300000 | 0.120473 | 0.043971613 |
| chr1 | 1.91E+08 | 1.91E+08 | 1012 | 882 | 191350000 | 0.125987 | 0.037202352 |
| chr1 | 1.91E+08 | 1.91E+08 | 979  | 854 | 191400000 | 0.124701 | 0.038699374 |
| chr1 | 1.91E+08 | 1.92E+08 | 1034 | 891 | 191500000 | 0.142367 | 0.021957038 |
| chr1 | 1.92E+08 | 1.92E+08 | 1039 | 886 | 191550000 | 0.157445 | 0.012973005 |
| chr1 | 1.92E+08 | 1.92E+08 | 1096 | 916 | 191900000 | 0.186457 | 0.00421798  |
| chr1 | 1.92E+08 | 1.92E+08 | 1054 | 858 | 191950000 | 0.224454 | 0.000775515 |
| chr1 | 1.92E+08 | 1.92E+08 | 1003 | 878 | 192150000 | 0.119657 | 0.04505359  |
| chr1 | 1.92E+08 | 1.92E+08 | 1032 | 898 | 192250000 | 0.128284 | 0.034646739 |
| chr1 | 1.92E+08 | 1.92E+08 | 1095 | 917 | 192300000 | 0.183565 | 0.004748826 |
| chr1 | 1.93E+08 | 1.93E+08 | 991  | 868 | 192600000 | 0.118818 | 0.046187711 |
| chr1 | 1.94E+08 | 1.94E+08 | 1074 | 939 | 193600000 | 0.121425 | 0.042736424 |
| chr1 | 1.94E+08 | 1.94E+08 | 962  | 810 | 193850000 | 0.175743 | 0.00649687  |
| chr1 | 1.94E+08 | 1.94E+08 | 963  | 810 | 194400000 | 0.177242 | 0.006123222 |
| chr1 | 1.94E+08 | 1.95E+08 | 994  | 848 | 194450000 | 0.15681  | 0.013274462 |
| chr1 | 1.95E+08 | 1.95E+08 | 924  | 802 | 194550000 | 0.131919 | 0.030899271 |
| chr1 | 1.95E+08 | 1.95E+08 | 970  | 793 | 194600000 | 0.218292 | 0.001038223 |
| chr1 | 1.95E+08 | 1.95E+08 | 993  | 821 | 194650000 | 0.20204  | 0.002171189 |
| chr1 | 1.95E+08 | 1.95E+08 | 990  | 838 | 194700000 | 0.168107 | 0.008732241 |
| chr1 | 1.95E+08 | 1.95E+08 | 994  | 855 | 194750000 | 0.14495  | 0.020120627 |
| chr1 | 1.95E+08 | 1.95E+08 | 967  | 817 | 194850000 | 0.170808 | 0.007874083 |
| chr1 | 1.95E+08 | 1.95E+08 | 1010 | 828 | 194900000 | 0.214281 | 0.001250925 |
| chr1 | 1.95E+08 | 1.95E+08 | 944  | 766 | 195100000 | 0.229071 | 0.000620531 |
| chr1 | 1.95E+08 | 1.95E+08 | 998  | 793 | 195150000 | 0.259347 | 0.000131217 |
| chr1 | 1.95E+08 | 1.95E+08 | 1047 | 854 | 195200000 | 0.221582 | 0.000889207 |
| chr1 | 1.95E+08 | 1.95E+08 | 1005 | 873 | 195250000 | 0.13077  | 0.032045288 |
| chr1 | 1.95E+08 | 1.95E+08 | 1043 | 895 | 195300000 | 0.148408 | 0.01786762  |
| chr1 | 1.95E+08 | 1.95E+08 | 1036 | 899 | 195350000 | 0.132259 | 0.030566303 |
| chr1 | 1.95E+08 | 1.95E+08 | 1009 | 857 | 195400000 | 0.163187 | 0.010507875 |
| chr1 | 1.95E+08 | 1.96E+08 | 996  | 861 | 195500000 | 0.137761 | 0.025585386 |
| chr1 | 1.96E+08 | 1.96E+08 | 980  | 815 | 195550000 | 0.19361  | 0.003126073 |
| chr1 | 1.96E+08 | 1.96E+08 | 984  | 834 | 195600000 | 0.166239 | 0.009372531 |

|      |          |          |      |      |           |          |             |
|------|----------|----------|------|------|-----------|----------|-------------|
| chr1 | 1.96E+08 | 1.96E+08 | 1013 | 814  | 195650000 | 0.243162 | 0.000307116 |
| chr1 | 1.96E+08 | 1.96E+08 | 1058 | 833  | 195700000 | 0.272579 | 6.33E-05    |
| chr1 | 1.96E+08 | 1.96E+08 | 1048 | 836  | 195750000 | 0.253692 | 0.000177526 |
| chr1 | 1.96E+08 | 1.96E+08 | 1020 | 855  | 195800000 | 0.182201 | 0.005019524 |
| chr1 | 1.96E+08 | 1.96E+08 | 1000 | 858  | 195850000 | 0.148579 | 0.017762127 |
| chr1 | 1.96E+08 | 1.96E+08 | 1008 | 876  | 195900000 | 0.130121 | 0.032708295 |
| chr1 | 1.96E+08 | 1.96E+08 | 1040 | 906  | 195950000 | 0.126629 | 0.036473111 |
| chr1 | 1.96E+08 | 1.96E+08 | 1049 | 888  | 1.96E+08  | 0.168011 | 0.008763923 |
| chr1 | 1.96E+08 | 1.96E+08 | 1013 | 860  | 196050000 | 0.163854 | 0.010250129 |
| chr1 | 1.96E+08 | 1.96E+08 | 981  | 854  | 196200000 | 0.127645 | 0.035342258 |
| chr1 | 1.96E+08 | 1.96E+08 | 1086 | 936  | 196250000 | 0.142072 | 0.022175707 |
| chr1 | 1.97E+08 | 1.97E+08 | 1060 | 879  | 196600000 | 0.197757 | 0.002616902 |
| chr1 | 1.97E+08 | 1.97E+08 | 984  | 819  | 196650000 | 0.192423 | 0.003287407 |
| chr1 | 1.97E+08 | 1.97E+08 | 721  | 612  | 196700000 | 0.164096 | 0.01015793  |
| chr1 | 1.97E+08 | 1.97E+08 | 930  | 765  | 1.97E+08  | 0.209399 | 0.001563472 |
| chr1 | 1.97E+08 | 1.97E+08 | 963  | 817  | 197050000 | 0.164828 | 0.009883406 |
| chr1 | 1.97E+08 | 1.97E+08 | 1002 | 839  | 197300000 | 0.183768 | 0.004709772 |
| chr1 | 1.98E+08 | 1.98E+08 | 932  | 813  | 197550000 | 0.124703 | 0.03869723  |
| chr1 | 1.98E+08 | 1.98E+08 | 983  | 821  | 197600000 | 0.187437 | 0.004050359 |
| chr1 | 1.98E+08 | 1.98E+08 | 966  | 785  | 197650000 | 0.226959 | 0.000687469 |
| chr1 | 1.98E+08 | 1.98E+08 | 986  | 848  | 197700000 | 0.145152 | 0.019982705 |
| chr1 | 1.98E+08 | 1.98E+08 | 1022 | 855  | 198200000 | 0.185027 | 0.0044734   |
| chr1 | 1.98E+08 | 1.98E+08 | 991  | 854  | 198250000 | 0.142277 | 0.022023412 |
| chr1 | 1.99E+08 | 1.99E+08 | 1029 | 887  | 198550000 | 0.141865 | 0.022329923 |
| chr1 | 1.99E+08 | 1.99E+08 | 1054 | 923  | 198600000 | 0.119101 | 0.045803454 |
| chr1 | 1.99E+08 | 1.99E+08 | 1053 | 904  | 198750000 | 0.147739 | 0.018285689 |
| chr1 | 1.99E+08 | 1.99E+08 | 1044 | 862  | 198800000 | 0.20399  | 0.001992063 |
| chr1 | 1.99E+08 | 1.99E+08 | 1048 | 890  | 198850000 | 0.16339  | 0.010429012 |
| chr1 | 1.99E+08 | 1.99E+08 | 998  | 872  | 199300000 | 0.12234  | 0.041576156 |
| chr1 | 1.99E+08 | 1.99E+08 | 1054 | 900  | 199350000 | 0.155506 | 0.013911944 |
| chr1 | 1.99E+08 | 1.99E+08 | 1077 | 903  | 199400000 | 0.181849 | 0.005091658 |
| chr1 | 2.01E+08 | 2.01E+08 | 897  | 787  | 200550000 | 0.116373 | 0.049626479 |
| chr1 | 2.01E+08 | 2.01E+08 | 1044 | 1081 | 200950000 | -0.12262 | 0.040904913 |
| chr1 | 2.01E+08 | 2.01E+08 | 1148 | 1219 | 2.01E+08  | -0.15895 | 0.01208792  |
| chr1 | 2.01E+08 | 2.01E+08 | 1030 | 1136 | 201150000 | -0.21369 | 0.001239004 |
| chr1 | 2.01E+08 | 2.01E+08 | 930  | 1025 | 201200000 | -0.21269 | 0.001297688 |
| chr1 | 2.01E+08 | 2.01E+08 | 987  | 1060 | 201250000 | -0.17531 | 0.006469449 |
| chr1 | 2.01E+08 | 2.01E+08 | 1121 | 1296 | 201300000 | -0.28165 | 3.48E-05    |
| chr1 | 2.01E+08 | 2.01E+08 | 1128 | 1218 | 201350000 | -0.18312 | 0.004722017 |
| chr1 | 2.01E+08 | 2.02E+08 | 1007 | 1059 | 201500000 | -0.14501 | 0.019829443 |
| chr1 | 2.02E+08 | 2.02E+08 | 1017 | 1079 | 201550000 | -0.15775 | 0.012631371 |
| chr1 | 2.02E+08 | 2.02E+08 | 1057 | 1126 | 201600000 | -0.1636  | 0.010167626 |
| chr1 | 2.02E+08 | 2.02E+08 | 1032 | 1135 | 201650000 | -0.20962 | 0.001494846 |
| chr1 | 2.02E+08 | 2.02E+08 | 917  | 981  | 201900000 | -0.1697  | 0.008058654 |
| chr1 | 2.02E+08 | 2.02E+08 | 841  | 872  | 2.02E+08  | -0.12459 | 0.038506143 |
| chr1 | 2.02E+08 | 2.02E+08 | 956  | 1028 | 202150000 | -0.17713 | 0.006018394 |
| chr1 | 2.02E+08 | 2.02E+08 | 971  | 1077 | 202200000 | -0.22185 | 0.000842929 |

|      |          |          |      |      |           |          |             |
|------|----------|----------|------|------|-----------|----------|-------------|
| chr1 | 2.02E+08 | 2.02E+08 | 360  | 294  | 202400000 | 0.219809 | 0.000966864 |
| chr1 | 2.02E+08 | 2.03E+08 | 377  | 326  | 202450000 | 0.137321 | 0.025956885 |
| chr1 | 2.03E+08 | 2.03E+08 | 864  | 920  | 202600000 | -0.16297 | 0.01041035  |
| chr1 | 2.03E+08 | 2.03E+08 | 971  | 1036 | 202650000 | -0.16585 | 0.009339534 |
| chr1 | 2.03E+08 | 2.03E+08 | 1057 | 1126 | 2.03E+08  | -0.1636  | 0.010167626 |
| chr1 | 2.03E+08 | 2.03E+08 | 1156 | 1217 | 203050000 | -0.14656 | 0.018799834 |
| chr1 | 2.03E+08 | 2.03E+08 | 1110 | 1166 | 203100000 | -0.14338 | 0.020964971 |
| chr1 | 2.03E+08 | 2.03E+08 | 1070 | 1166 | 203150000 | -0.19633 | 0.002703624 |
| chr1 | 2.03E+08 | 2.03E+08 | 961  | 1004 | 203200000 | -0.13552 | 0.027238129 |
| chr1 | 2.03E+08 | 2.04E+08 | 1054 | 1116 | 203500000 | -0.15483 | 0.014039201 |
| chr1 | 2.04E+08 | 2.04E+08 | 982  | 1062 | 203550000 | -0.18536 | 0.004305076 |
| chr1 | 2.04E+08 | 2.04E+08 | 1131 | 1181 | 204100000 | -0.13478 | 0.027903289 |
| chr1 | 2.04E+08 | 2.04E+08 | 1122 | 1237 | 204150000 | -0.21314 | 0.001270807 |
| chr1 | 2.04E+08 | 2.04E+08 | 1081 | 1184 | 204200000 | -0.20367 | 0.001956254 |
| chr1 | 2.05E+08 | 2.05E+08 | 1001 | 1069 | 204550000 | -0.16719 | 0.008875165 |
| chr1 | 2.05E+08 | 2.05E+08 | 1088 | 1205 | 204600000 | -0.21973 | 0.000932773 |
| chr1 | 2.05E+08 | 2.05E+08 | 1141 | 1181 | 204650000 | -0.12208 | 0.041573899 |
| chr1 | 2.05E+08 | 2.05E+08 | 1121 | 1196 | 204950000 | -0.1658  | 0.009357169 |
| chr1 | 2.05E+08 | 2.05E+08 | 977  | 1023 | 205250000 | -0.13875 | 0.024495523 |
| chr1 | 2.05E+08 | 2.06E+08 | 1087 | 1124 | 205450000 | -0.12066 | 0.043394039 |
| chr1 | 2.05E+08 | 2.06E+08 | 1009 | 1101 | 205500000 | -0.19826 | 0.002485455 |
| chr1 | 2.06E+08 | 2.06E+08 | 954  | 1026 | 205550000 | -0.17734 | 0.005967631 |
| chr1 | 2.06E+08 | 2.06E+08 | 934  | 1026 | 205600000 | -0.20791 | 0.001616337 |
| chr1 | 2.06E+08 | 2.06E+08 | 923  | 1003 | 205650000 | -0.19229 | 0.003216695 |
| chr1 | 2.06E+08 | 2.06E+08 | 672  | 708  | 205900000 | -0.14766 | 0.018096384 |
| chr1 | 2.06E+08 | 2.06E+08 | 296  | 317  | 205950000 | -0.17126 | 0.00758718  |
| chr1 | 2.06E+08 | 2.06E+08 | 3    | 5    | 206050000 | -0.80934 | 7.76E-28    |
| chr1 | 2.06E+08 | 2.06E+08 | 12   | 9    | 206100000 | 0.342666 | 8.12E-07    |
| chr1 | 2.06E+08 | 2.06E+08 | 150  | 127  | 206150000 | 0.167762 | 0.008847312 |
| chr1 | 2.06E+08 | 2.06E+08 | 699  | 612  | 206200000 | 0.119389 | 0.045413442 |
| chr1 | 2.06E+08 | 2.07E+08 | 4    | 5    | 206450000 | -0.3943  | 1.58E-08    |
| chr1 | 2.06E+08 | 2.07E+08 | 17   | 25   | 206500000 | -0.62877 | 2.85E-18    |
| chr1 | 2.07E+08 | 2.07E+08 | 206  | 178  | 206550000 | 0.138395 | 0.025057402 |
| chr1 | 2.07E+08 | 2.07E+08 | 1110 | 1145 | 207100000 | -0.11716 | 0.048159216 |
| chr1 | 2.08E+08 | 2.08E+08 | 419  | 437  | 207700000 | -0.13305 | 0.029506532 |
| chr1 | 2.08E+08 | 2.08E+08 | 1126 | 1209 | 208200000 | -0.17498 | 0.006555845 |
| chr1 | 2.08E+08 | 2.08E+08 | 1119 | 1199 | 208250000 | -0.17199 | 0.007372553 |
| chr1 | 2.08E+08 | 2.08E+08 | 1077 | 1110 | 208400000 | -0.11591 | 0.049953237 |
| chr1 | 2.08E+08 | 2.09E+08 | 1072 | 1131 | 208450000 | -0.14967 | 0.016871817 |
| chr1 | 2.09E+08 | 2.09E+08 | 1001 | 1033 | 208950000 | -0.11777 | 0.047299798 |
| chr1 | 2.09E+08 | 2.09E+08 | 947  | 1011 | 209400000 | -0.16672 | 0.009036897 |
| chr1 | 2.1E+08  | 2.1E+08  | 1111 | 1151 | 209700000 | -0.1234  | 0.039939507 |
| chr1 | 2.1E+08  | 2.1E+08  | 1006 | 1062 | 209900000 | -0.15053 | 0.016369292 |
| chr1 | 2.1E+08  | 2.1E+08  | 1034 | 1100 | 209950000 | -0.16164 | 0.010942513 |
| chr1 | 2.1E+08  | 2.1E+08  | 975  | 851  | 210150000 | 0.123871 | 0.039691157 |
| chr1 | 2.1E+08  | 2.1E+08  | 984  | 858  | 210250000 | 0.125309 | 0.037985686 |
| chr1 | 2.1E+08  | 2.1E+08  | 1007 | 848  | 210300000 | 0.175556 | 0.006544999 |

|      |          |          |      |      |           |          |             |
|------|----------|----------|------|------|-----------|----------|-------------|
| chr1 | 2.11E+08 | 2.11E+08 | 845  | 883  | 211100000 | -0.13583 | 0.026962754 |
| chr1 | 2.12E+08 | 2.12E+08 | 1012 | 881  | 212150000 | 0.127624 | 0.035366095 |
| chr1 | 2.13E+08 | 2.13E+08 | 890  | 923  | 213100000 | -0.1249  | 0.038148987 |
| chr1 | 2.14E+08 | 2.14E+08 | 1074 | 1107 | 214150000 | -0.11603 | 0.049778524 |
| chr1 | 2.14E+08 | 2.15E+08 | 986  | 1078 | 214500000 | -0.20107 | 0.002196528 |
| chr1 | 2.15E+08 | 2.15E+08 | 1034 | 1098 | 214550000 | -0.15901 | 0.012058465 |
| chr1 | 2.15E+08 | 2.15E+08 | 1059 | 924  | 214700000 | 0.124366 | 0.039097298 |
| chr1 | 2.15E+08 | 2.15E+08 | 892  | 929  | 214900000 | -0.13101 | 0.031506523 |
| chr1 | 2.15E+08 | 2.15E+08 | 1008 | 880  | 215100000 | 0.123548 | 0.040082672 |
| chr1 | 2.15E+08 | 2.15E+08 | 1040 | 893  | 215150000 | 0.14748  | 0.018450018 |
| chr1 | 2.16E+08 | 2.16E+08 | 946  | 818  | 216300000 | 0.137368 | 0.025917168 |
| chr1 | 2.16E+08 | 2.17E+08 | 1017 | 885  | 216500000 | 0.128199 | 0.034738993 |
| chr1 | 2.17E+08 | 2.17E+08 | 916  | 947  | 216700000 | -0.12039 | 0.043751584 |
| chr1 | 2.17E+08 | 2.17E+08 | 988  | 1034 | 216750000 | -0.13803 | 0.02508886  |
| chr1 | 2.17E+08 | 2.17E+08 | 1134 | 972  | 2.17E+08  | 0.150021 | 0.016892961 |
| chr1 | 2.17E+08 | 2.17E+08 | 1104 | 952  | 217250000 | 0.141335 | 0.022729722 |
| chr1 | 2.17E+08 | 2.17E+08 | 1147 | 978  | 217300000 | 0.157587 | 0.012906473 |
| chr1 | 2.18E+08 | 2.18E+08 | 1059 | 881  | 217750000 | 0.193117 | 0.003192204 |
| chr1 | 2.18E+08 | 2.18E+08 | 1013 | 826  | 217950000 | 0.222049 | 0.000869729 |
| chr1 | 2.18E+08 | 2.18E+08 | 1013 | 837  | 2.18E+08  | 0.202963 | 0.002084657 |
| chr1 | 2.19E+08 | 2.19E+08 | 1030 | 894  | 218650000 | 0.131926 | 0.030892407 |
| chr1 | 2.19E+08 | 2.19E+08 | 1055 | 922  | 219150000 | 0.122033 | 0.041963091 |
| chr1 | 2.19E+08 | 2.19E+08 | 995  | 867  | 219250000 | 0.126293 | 0.036853431 |
| chr1 | 2.19E+08 | 2.19E+08 | 1062 | 922  | 219400000 | 0.131573 | 0.031240341 |
| chr1 | 2.2E+08  | 2.2E+08  | 986  | 1052 | 219850000 | -0.16585 | 0.009341538 |
| chr1 | 2.2E+08  | 2.2E+08  | 883  | 755  | 220300000 | 0.153565 | 0.014910221 |
| chr1 | 2.2E+08  | 2.2E+08  | 1029 | 847  | 220350000 | 0.208437 | 0.001632908 |
| chr1 | 2.2E+08  | 2.2E+08  | 984  | 820  | 220400000 | 0.190663 | 0.003540577 |
| chr1 | 2.21E+08 | 2.21E+08 | 973  | 1031 | 221200000 | -0.1559  | 0.013506845 |
| chr1 | 2.21E+08 | 2.21E+08 | 979  | 1012 | 221250000 | -0.1202  | 0.043999342 |
| chr1 | 2.22E+08 | 2.23E+08 | 966  | 1012 | 222500000 | -0.13949 | 0.023901227 |
| chr1 | 2.23E+08 | 2.23E+08 | 590  | 510  | 222700000 | 0.137846 | 0.025513958 |
| chr1 | 2.23E+08 | 2.23E+08 | 966  | 833  | 223050000 | 0.141335 | 0.022729722 |
| chr1 | 2.23E+08 | 2.23E+08 | 1041 | 887  | 223200000 | 0.158592 | 0.012443894 |
| chr1 | 2.24E+08 | 2.24E+08 | 1000 | 1055 | 223850000 | -0.14961 | 0.016902064 |
| chr1 | 2.24E+08 | 2.24E+08 | 953  | 1015 | 223900000 | -0.1633  | 0.010282725 |
| chr1 | 2.24E+08 | 2.24E+08 | 55   | 42   | 224150000 | 0.316671 | 4.50E-06    |
| chr1 | 2.24E+08 | 2.24E+08 | 757  | 790  | 224350000 | -0.13393 | 0.028683683 |
| chr1 | 2.25E+08 | 2.25E+08 | 735  | 772  | 225400000 | -0.14323 | 0.021073218 |
| chr1 | 2.25E+08 | 2.26E+08 | 793  | 819  | 225450000 | -0.11891 | 0.045721775 |
| chr1 | 2.26E+08 | 2.26E+08 | 947  | 978  | 225600000 | -0.11884 | 0.045820543 |
| chr1 | 2.26E+08 | 2.26E+08 | 872  | 936  | 2.26E+08  | -0.17455 | 0.006667503 |
| chr1 | 2.26E+08 | 2.26E+08 | 942  | 1064 | 226050000 | -0.24807 | 0.000225427 |
| chr1 | 2.26E+08 | 2.26E+08 | 947  | 979  | 226100000 | -0.12032 | 0.043846701 |
| chr1 | 2.27E+08 | 2.27E+08 | 1007 | 1072 | 226600000 | -0.16261 | 0.010552081 |
| chr1 | 2.27E+08 | 2.27E+08 | 938  | 986  | 226650000 | -0.14437 | 0.020268115 |
| chr1 | 2.27E+08 | 2.27E+08 | 917  | 1001 | 227100000 | -0.19882 | 0.002425246 |

|      |          |          |      |      |           |          |             |
|------|----------|----------|------|------|-----------|----------|-------------|
| chr1 | 2.27E+08 | 2.27E+08 | 917  | 983  | 227150000 | -0.17264 | 0.00718802  |
| chr1 | 2.27E+08 | 2.27E+08 | 1064 | 929  | 227250000 | 0.123376 | 0.040293204 |
| chr1 | 2.28E+08 | 2.28E+08 | 715  | 745  | 227700000 | -0.13167 | 0.030847857 |
| chr1 | 2.28E+08 | 2.28E+08 | 1022 | 1054 | 227950000 | -0.11685 | 0.048597986 |
| chr1 | 2.28E+08 | 2.28E+08 | 963  | 1058 | 228050000 | -0.2081  | 0.001602019 |
| chr1 | 2.28E+08 | 2.28E+08 | 1094 | 1262 | 228100000 | -0.27847 | 4.19E-05    |
| chr1 | 2.28E+08 | 2.28E+08 | 875  | 954  | 228150000 | -0.19708 | 0.002617005 |
| chr1 | 2.28E+08 | 2.28E+08 | 803  | 845  | 228200000 | -0.14592 | 0.019217239 |
| chr1 | 2.28E+08 | 2.28E+08 | 1126 | 1170 | 228250000 | -0.12767 | 0.035000646 |
| chr1 | 2.28E+08 | 2.28E+08 | 1033 | 1077 | 228350000 | -0.13255 | 0.029989615 |
| chr1 | 2.28E+08 | 2.28E+08 | 1013 | 1108 | 228400000 | -0.2017  | 0.002136449 |
| chr1 | 2.28E+08 | 2.29E+08 | 1098 | 1194 | 228450000 | -0.1933  | 0.003081288 |
| chr1 | 2.28E+08 | 2.29E+08 | 1156 | 1388 | 228500000 | -0.33624 | 1.10E-06    |
| chr1 | 2.29E+08 | 2.29E+08 | 1122 | 1386 | 228550000 | -0.37723 | 5.84E-08    |
| chr1 | 2.29E+08 | 2.29E+08 | 1052 | 1195 | 228600000 | -0.25625 | 0.000145722 |
| chr1 | 2.29E+08 | 2.29E+08 | 990  | 1051 | 228650000 | -0.15863 | 0.012227749 |
| chr1 | 2.29E+08 | 2.29E+08 | 533  | 571  | 228750000 | -0.17173 | 0.007449619 |
| chr1 | 2.29E+08 | 2.29E+08 | 1047 | 1110 | 228900000 | -0.15667 | 0.013136892 |
| chr1 | 2.3E+08  | 2.3E+08  | 927  | 973  | 229750000 | -0.14224 | 0.021789386 |
| chr1 | 2.3E+08  | 2.3E+08  | 1038 | 1075 | 2.30E+08  | -0.1229  | 0.040551388 |
| chr1 | 2.3E+08  | 2.3E+08  | 1068 | 1118 | 230200000 | -0.13838 | 0.024795559 |
| chr1 | 2.3E+08  | 2.3E+08  | 1055 | 1099 | 230350000 | -0.13132 | 0.031193303 |
| chr1 | 2.3E+08  | 2.3E+08  | 983  | 1062 | 230400000 | -0.18389 | 0.004574266 |
| chr1 | 2.3E+08  | 2.31E+08 | 985  | 1107 | 230450000 | -0.24083 | 0.000328439 |
| chr1 | 2.3E+08  | 2.31E+08 | 1062 | 1137 | 230500000 | -0.17082 | 0.007717269 |
| chr1 | 2.31E+08 | 2.31E+08 | 1000 | 1056 | 230900000 | -0.15098 | 0.016107706 |
| chr1 | 2.31E+08 | 2.31E+08 | 962  | 1039 | 231150000 | -0.18346 | 0.004656584 |
| chr1 | 2.31E+08 | 2.31E+08 | 968  | 1004 | 231200000 | -0.12505 | 0.037967313 |
| chr1 | 2.31E+08 | 2.31E+08 | 1036 | 1094 | 231350000 | -0.15096 | 0.01611972  |
| chr1 | 2.33E+08 | 2.33E+08 | 988  | 862  | 232900000 | 0.124451 | 0.038995599 |
| chr1 | 2.33E+08 | 2.33E+08 | 976  | 825  | 232950000 | 0.170115 | 0.008086738 |
| chr1 | 2.33E+08 | 2.33E+08 | 1069 | 931  | 2.33E+08  | 0.127037 | 0.036015458 |
| chr1 | 2.33E+08 | 2.33E+08 | 1005 | 1052 | 233100000 | -0.13831 | 0.02485257  |
| chr1 | 2.33E+08 | 2.33E+08 | 1032 | 867  | 233300000 | 0.178967 | 0.005716918 |
| chr1 | 2.33E+08 | 2.33E+08 | 1069 | 926  | 233350000 | 0.134806 | 0.028168397 |
| chr1 | 2.34E+08 | 2.34E+08 | 1029 | 899  | 233850000 | 0.122478 | 0.041403011 |
| chr1 | 2.35E+08 | 2.35E+08 | 1022 | 878  | 234550000 | 0.146731 | 0.018931839 |
| chr1 | 2.35E+08 | 2.35E+08 | 953  | 1000 | 234900000 | -0.14182 | 0.022099552 |
| chr1 | 2.35E+08 | 2.35E+08 | 966  | 806  | 235400000 | 0.188872 | 0.003816045 |
| chr1 | 2.35E+08 | 2.36E+08 | 962  | 810  | 235450000 | 0.175743 | 0.00649687  |
| chr1 | 2.36E+08 | 2.36E+08 | 739  | 644  | 235550000 | 0.126142 | 0.037025221 |
| chr1 | 2.36E+08 | 2.36E+08 | 1005 | 880  | 235850000 | 0.119248 | 0.045603361 |
| chr1 | 2.36E+08 | 2.36E+08 | 1012 | 885  | 2.36E+08  | 0.121088 | 0.043170442 |
| chr1 | 2.36E+08 | 2.36E+08 | 1009 | 880  | 236050000 | 0.124979 | 0.038371687 |
| chr1 | 2.36E+08 | 2.36E+08 | 912  | 742  | 236400000 | 0.225243 | 0.000746709 |
| chr1 | 2.36E+08 | 2.37E+08 | 908  | 794  | 236450000 | 0.121182 | 0.043049848 |
| chr1 | 2.37E+08 | 2.37E+08 | 891  | 931  | 237250000 | -0.13573 | 0.027056618 |

|       |          |          |      |      |           |          |             |
|-------|----------|----------|------|------|-----------|----------|-------------|
| chr1  | 2.37E+08 | 2.38E+08 | 1027 | 874  | 237450000 | 0.160359 | 0.011665517 |
| chr1  | 2.37E+08 | 2.38E+08 | 1062 | 913  | 237500000 | 0.145725 | 0.019595332 |
| chr1  | 2.39E+08 | 2.39E+08 | 951  | 825  | 238550000 | 0.132679 | 0.030159319 |
| chr1  | 2.39E+08 | 2.39E+08 | 1017 | 854  | 238700000 | 0.17964  | 0.005565128 |
| chr1  | 2.39E+08 | 2.39E+08 | 997  | 802  | 238750000 | 0.241619 | 0.000332249 |
| chr1  | 2.39E+08 | 2.39E+08 | 1000 | 777  | 238800000 | 0.291642 | 2.10E-05    |
| chr1  | 2.39E+08 | 2.39E+08 | 980  | 852  | 239200000 | 0.129557 | 0.033294148 |
| chr1  | 2.39E+08 | 2.39E+08 | 935  | 820  | 239250000 | 0.116971 | 0.048767116 |
| chr1  | 2.39E+08 | 2.39E+08 | 984  | 858  | 239300000 | 0.125309 | 0.037985686 |
| chr1  | 2.4E+08  | 2.4E+08  | 1091 | 923  | 239600000 | 0.168877 | 0.008479546 |
| chr1  | 2.4E+08  | 2.4E+08  | 1056 | 910  | 239650000 | 0.1423   | 0.022006854 |
| chr1  | 2.4E+08  | 2.41E+08 | 1061 | 907  | 240500000 | 0.153878 | 0.014744978 |
| chr1  | 2.41E+08 | 2.41E+08 | 1050 | 882  | 240600000 | 0.179167 | 0.005671473 |
| chr1  | 2.41E+08 | 2.41E+08 | 1044 | 902  | 240650000 | 0.138551 | 0.024929615 |
| chr1  | 2.42E+08 | 2.42E+08 | 1006 | 848  | 241750000 | 0.174122 | 0.006923565 |
| chr1  | 2.42E+08 | 2.42E+08 | 1023 | 871  | 241800000 | 0.15969  | 0.011955299 |
| chr1  | 2.42E+08 | 2.42E+08 | 1049 | 916  | 241850000 | 0.123223 | 0.040479979 |
| chr1  | 2.42E+08 | 2.42E+08 | 995  | 873  | 241950000 | 0.116343 | 0.049669144 |
| chr1  | 2.42E+08 | 2.42E+08 | 939  | 802  | 242350000 | 0.155151 | 0.014090085 |
| chr1  | 2.43E+08 | 2.43E+08 | 158  | 133  | 243100000 | 0.176127 | 0.006399436 |
| chr1  | 2.43E+08 | 2.43E+08 | 74   | 78   | 243250000 | -0.14832 | 0.017684891 |
| chr1  | 2.44E+08 | 2.44E+08 | 1114 | 962  | 243650000 | 0.139269 | 0.024345792 |
| chr1  | 2.44E+08 | 2.44E+08 | 1012 | 814  | 2.44E+08  | 0.241737 | 0.000330272 |
| chr1  | 2.44E+08 | 2.44E+08 | 1058 | 920  | 244050000 | 0.129262 | 0.033603145 |
| chr1  | 2.45E+08 | 2.45E+08 | 846  | 703  | 244650000 | 0.194761 | 0.00297644  |
| chr1  | 2.45E+08 | 2.45E+08 | 839  | 731  | 244700000 | 0.126428 | 0.036700398 |
| chr1  | 2.45E+08 | 2.45E+08 | 845  | 872  | 245100000 | -0.11775 | 0.047329841 |
| chr1  | 2.45E+08 | 2.45E+08 | 898  | 1009 | 245250000 | -0.24051 | 0.00033389  |
| chr1  | 2.45E+08 | 2.45E+08 | 911  | 1033 | 245300000 | -0.25369 | 0.000167252 |
| chr1  | 2.45E+08 | 2.46E+08 | 889  | 974  | 245450000 | -0.20411 | 0.001918478 |
| chr1  | 2.46E+08 | 2.46E+08 | 997  | 1056 | 245850000 | -0.15532 | 0.01379716  |
| chr1  | 2.46E+08 | 2.46E+08 | 950  | 825  | 246400000 | 0.131162 | 0.031650847 |
| chr1  | 2.47E+08 | 2.47E+08 | 939  | 787  | 246550000 | 0.18239  | 0.004981283 |
| chr1  | 2.47E+08 | 2.47E+08 | 904  | 780  | 246800000 | 0.140477 | 0.023389456 |
| chr1  | 2.47E+08 | 2.47E+08 | 912  | 800  | 247100000 | 0.116662 | 0.049209057 |
| chr1  | 2.48E+08 | 2.48E+08 | 987  | 865  | 247800000 | 0.117978 | 0.047346567 |
| chr1  | 2.48E+08 | 2.48E+08 | 890  | 778  | 248400000 | 0.121663 | 0.042431726 |
| chr1  | 2.49E+08 | 2.49E+08 | 529  | 464  | 248600000 | 0.116771 | 0.049052477 |
| chr1  | 2.49E+08 | 2.49E+08 | 211  | 180  | 248650000 | 0.156874 | 0.013243587 |
| chr1  | 2.49E+08 | 2.49E+08 | 265  | 286  | 248750000 | -0.18239 | 0.004864242 |
| chr1  | 2.49E+08 | 2.49E+08 | 908  | 972  | 249100000 | -0.17064 | 0.007772749 |
| chr1  | 2.49E+08 | 2.49E+08 | 1013 | 1082 | 249150000 | -0.16744 | 0.008791948 |
| chr1  | 2.49E+08 | 2.49E+08 | 150  | 169  | 249250000 | -0.24443 | 0.000272683 |
| chr11 | 50001    | 150000   | 4    | 5    | 1.00E+05  | -0.3943  | 1.58E-08    |
| chr11 | 100001   | 200000   | 195  | 211  | 150000    | -0.18614 | 0.004167928 |
| chr11 | 150001   | 250000   | 670  | 696  | 2.00E+05  | -0.1273  | 0.035413517 |
| chr11 | 200001   | 300000   | 975  | 1063 | 250000    | -0.19704 | 0.002621426 |

|       |         |         |      |      |          |          |             |
|-------|---------|---------|------|------|----------|----------|-------------|
| chr11 | 250001  | 350000  | 854  | 931  | 3.00E+05 | -0.19692 | 0.00263542  |
| chr11 | 300001  | 400000  | 856  | 969  | 350000   | -0.25126 | 0.000190447 |
| chr11 | 350001  | 450000  | 946  | 1194 | 4.00E+05 | -0.40826 | 5.25E-09    |
| chr11 | 400001  | 500000  | 897  | 1171 | 450000   | -0.45693 | 8.80E-11    |
| chr11 | 450001  | 550000  | 877  | 1072 | 5.00E+05 | -0.36203 | 1.79E-07    |
| chr11 | 500001  | 600000  | 908  | 1108 | 550000   | -0.35957 | 2.14E-07    |
| chr11 | 550001  | 650000  | 967  | 1164 | 6.00E+05 | -0.33988 | 8.55E-07    |
| chr11 | 600001  | 700000  | 963  | 995  | 650000   | -0.11953 | 0.044887152 |
| chr11 | 700001  | 800000  | 871  | 985  | 750000   | -0.24982 | 0.000205516 |
| chr11 | 750001  | 850000  | 974  | 1242 | 8.00E+05 | -0.42304 | 1.58E-09    |
| chr11 | 800001  | 900000  | 1066 | 1350 | 850000   | -0.41312 | 3.55E-09    |
| chr11 | 850001  | 950000  | 1016 | 1192 | 9.00E+05 | -0.30286 | 9.67E-06    |
| chr11 | 900001  | 1000000 | 974  | 1040 | 950000   | -0.16696 | 0.008953462 |
| chr11 | 950001  | 1050000 | 1107 | 1225 | 1.00E+06 | -0.2185  | 0.000988758 |
| chr11 | 1000001 | 1100000 | 1171 | 1402 | 1050000  | -0.33212 | 1.45E-06    |
| chr11 | 1050001 | 1150000 | 1078 | 1338 | 1100000  | -0.38409 | 3.47E-08    |
| chr11 | 1100001 | 1200000 | 643  | 809  | 1150000  | -0.40369 | 7.56E-09    |
| chr11 | 1150001 | 1250000 | 559  | 675  | 1200000  | -0.34441 | 6.25E-07    |
| chr11 | 1200001 | 1300000 | 868  | 1087 | 1250000  | -0.39696 | 1.29E-08    |
| chr11 | 1250001 | 1350000 | 939  | 1082 | 1300000  | -0.27688 | 4.60E-05    |
| chr11 | 1300001 | 1400000 | 988  | 1090 | 1350000  | -0.21412 | 0.001214646 |
| chr11 | 1350001 | 1450000 | 987  | 1226 | 1400000  | -0.38521 | 3.19E-08    |
| chr11 | 1400001 | 1500000 | 1038 | 1326 | 1450000  | -0.42565 | 1.27E-09    |
| chr11 | 1450001 | 1550000 | 1078 | 1291 | 1500000  | -0.3325  | 1.41E-06    |
| chr11 | 1500001 | 1600000 | 1101 | 1207 | 1550000  | -0.20498 | 0.001844808 |
| chr11 | 1550001 | 1650000 | 896  | 972  | 1600000  | -0.18983 | 0.003571012 |
| chr11 | 1600001 | 1700000 | 722  | 808  | 1650000  | -0.23473 | 0.000447811 |
| chr11 | 1700001 | 1800000 | 1013 | 1045 | 1750000  | -0.11724 | 0.048044665 |
| chr11 | 1750001 | 1850000 | 1040 | 1125 | 1800000  | -0.18571 | 0.004242581 |
| chr11 | 1800001 | 1900000 | 993  | 1172 | 1850000  | -0.31148 | 5.61E-06    |
| chr11 | 1850001 | 1950000 | 1073 | 1305 | 1900000  | -0.35477 | 3.02E-07    |
| chr11 | 1900001 | 2000000 | 1075 | 1257 | 1950000  | -0.29802 | 1.30E-05    |
| chr11 | 1950001 | 2050000 | 1088 | 1315 | 2.00E+06 | -0.34576 | 5.69E-07    |
| chr11 | 2000001 | 2100000 | 1078 | 1359 | 2050000  | -0.40656 | 6.02E-09    |
| chr11 | 2050001 | 2150000 | 1049 | 1281 | 2100000  | -0.36063 | 1.98E-07    |
| chr11 | 2100001 | 2200000 | 1062 | 1247 | 2150000  | -0.30405 | 8.97E-06    |
| chr11 | 2150001 | 2250000 | 1088 | 1342 | 2200000  | -0.37508 | 6.85E-08    |
| chr11 | 2200001 | 2300000 | 1075 | 1244 | 2250000  | -0.28302 | 3.21E-05    |
| chr11 | 2250001 | 2350000 | 1064 | 1106 | 2300000  | -0.12823 | 0.034401396 |
| chr11 | 2300001 | 2400000 | 994  | 1068 | 2350000  | -0.17597 | 0.006304217 |
| chr11 | 2350001 | 2450000 | 1029 | 1244 | 2400000  | -0.34612 | 5.55E-07    |
| chr11 | 2400001 | 2500000 | 1110 | 1403 | 2450000  | -0.41033 | 4.45E-09    |
| chr11 | 2450001 | 2550000 | 1033 | 1160 | 2500000  | -0.23966 | 0.00034882  |
| chr11 | 2500001 | 2600000 | 1031 | 1073 | 2550000  | -0.12998 | 0.032553113 |
| chr11 | 2550001 | 2650000 | 1065 | 1140 | 2600000  | -0.17055 | 0.007798014 |
| chr11 | 2700001 | 2800000 | 1162 | 1238 | 2750000  | -0.16377 | 0.010102948 |
| chr11 | 2750001 | 2850000 | 1166 | 1343 | 2800000  | -0.27626 | 4.76E-05    |

|       |          |          |      |      |          |          |             |
|-------|----------|----------|------|------|----------|----------|-------------|
| chr11 | 2800001  | 2900000  | 1164 | 1355 | 2850000  | -0.29157 | 1.93E-05    |
| chr11 | 2850001  | 2950000  | 1119 | 1299 | 2900000  | -0.28756 | 2.46E-05    |
| chr11 | 2900001  | 3000000  | 1030 | 1187 | 2950000  | -0.27705 | 4.55E-05    |
| chr11 | 2950001  | 3050000  | 1006 | 1079 | 3.00E+06 | -0.17344 | 0.006967266 |
| chr11 | 3000001  | 3100000  | 957  | 1003 | 3050000  | -0.1401  | 0.023414404 |
| chr11 | 3050001  | 3150000  | 876  | 999  | 3100000  | -0.26193 | 0.000106885 |
| chr11 | 3100001  | 3200000  | 998  | 1218 | 3150000  | -0.35977 | 2.11E-07    |
| chr11 | 3150001  | 3250000  | 1084 | 1325 | 3200000  | -0.362   | 1.79E-07    |
| chr11 | 3200001  | 3300000  | 689  | 810  | 3250000  | -0.30579 | 8.05E-06    |
| chr11 | 3250001  | 3350000  | 167  | 183  | 3300000  | -0.20437 | 0.001896497 |
| chr11 | 3300001  | 3400000  | 409  | 423  | 3350000  | -0.12093 | 0.043047339 |
| chr11 | 3350001  | 3450000  | 529  | 568  | 3400000  | -0.17499 | 0.006551748 |
| chr11 | 3400001  | 3500000  | 171  | 210  | 3450000  | -0.36876 | 1.09E-07    |
| chr11 | 3450001  | 3550000  | 96   | 112  | 3500000  | -0.29476 | 1.59E-05    |
| chr11 | 3550001  | 3650000  | 311  | 339  | 3600000  | -0.19674 | 0.002655482 |
| chr11 | 3600001  | 3700000  | 712  | 736  | 3650000  | -0.1202  | 0.043999342 |
| chr11 | 3800001  | 3900000  | 896  | 963  | 3850000  | -0.17641 | 0.00619399  |
| chr11 | 3850001  | 3950000  | 871  | 924  | 3900000  | -0.15759 | 0.012703096 |
| chr11 | 4100001  | 4200000  | 884  | 929  | 4150000  | -0.144   | 0.020524043 |
| chr11 | 4250001  | 4350000  | 45   | 36   | 4300000  | 0.249556 | 0.000220671 |
| chr11 | 4300001  | 4400000  | 162  | 177  | 4350000  | -0.20013 | 0.002289825 |
| chr11 | 4350001  | 4450000  | 551  | 579  | 4400000  | -0.14388 | 0.020609046 |
| chr11 | 4400001  | 4500000  | 922  | 951  | 4450000  | -0.11705 | 0.048314475 |
| chr11 | 5550001  | 5650000  | 993  | 855  | 5600000  | 0.143498 | 0.021136423 |
| chr11 | 5600001  | 5700000  | 936  | 820  | 5650000  | 0.118513 | 0.046606326 |
| chr11 | 5650001  | 5750000  | 984  | 834  | 5700000  | 0.166239 | 0.009372531 |
| chr11 | 5700001  | 5800000  | 964  | 806  | 5750000  | 0.185882 | 0.004319106 |
| chr11 | 5750001  | 5850000  | 867  | 744  | 5800000  | 0.148358 | 0.017898712 |
| chr11 | 5800001  | 5900000  | 922  | 798  | 5850000  | 0.136006 | 0.027094003 |
| chr11 | 6100001  | 6200000  | 973  | 794  | 6150000  | 0.220929 | 0.000917104 |
| chr11 | 6550001  | 6650000  | 1113 | 1153 | 6600000  | -0.12331 | 0.040049469 |
| chr11 | 6600001  | 6700000  | 1092 | 1127 | 6650000  | -0.11789 | 0.047137336 |
| chr11 | 6800001  | 6900000  | 979  | 829  | 6850000  | 0.167565 | 0.008913838 |
| chr11 | 7150001  | 7250000  | 1012 | 872  | 7200000  | 0.142437 | 0.021905155 |
| chr11 | 7700001  | 7800000  | 948  | 814  | 7750000  | 0.147486 | 0.018445682 |
| chr11 | 7750001  | 7850000  | 803  | 679  | 7800000  | 0.169617 | 0.008242911 |
| chr11 | 8050001  | 8150000  | 1101 | 1164 | 8100000  | -0.15265 | 0.015182628 |
| chr11 | 8200001  | 8300000  | 1110 | 1177 | 8250000  | -0.15693 | 0.01301497  |
| chr11 | 8250001  | 8350000  | 1111 | 1198 | 8300000  | -0.18114 | 0.005119496 |
| chr11 | 9050001  | 9150000  | 1007 | 1043 | 9100000  | -0.12305 | 0.040372417 |
| chr11 | 9250001  | 9350000  | 796  | 689  | 9300000  | 0.135893 | 0.02719416  |
| chr11 | 9300001  | 9400000  | 755  | 621  | 9350000  | 0.209512 | 0.001555536 |
| chr11 | 9350001  | 9450000  | 776  | 649  | 9400000  | 0.185466 | 0.004393464 |
| chr11 | 9400001  | 9500000  | 791  | 669  | 9450000  | 0.1693   | 0.008343554 |
| chr11 | 9450001  | 9550000  | 822  | 713  | 9500000  | 0.132865 | 0.029981498 |
| chr11 | 10100001 | 10200000 | 940  | 799  | 10150000 | 0.162093 | 0.01094313  |
| chr11 | 10150001 | 10250000 | 909  | 770  | 10200000 | 0.16705  | 0.009089582 |



|       |          |          |      |      |          |          |             |
|-------|----------|----------|------|------|----------|----------|-------------|
| chr11 | 10200001 | 10300000 | 929  | 803  | 10250000 | 0.137907 | 0.025463005 |
| chr11 | 10300001 | 10400000 | 910  | 997  | 10350000 | -0.2041  | 0.001919457 |
| chr11 | 10900001 | 11000000 | 936  | 982  | 10950000 | -0.14159 | 0.022277106 |
| chr11 | 11400001 | 11500000 | 1092 | 1164 | 11450000 | -0.16449 | 0.0098338   |
| chr11 | 11450001 | 11550000 | 1078 | 1134 | 11500000 | -0.14544 | 0.019542554 |
| chr11 | 11750001 | 11850000 | 1011 | 1052 | 11800000 | -0.12972 | 0.032815833 |
| chr11 | 11900001 | 12000000 | 1113 | 971  | 11950000 | 0.124539 | 0.038891885 |
| chr11 | 12150001 | 12250000 | 1039 | 1112 | 12200000 | -0.17033 | 0.007864605 |
| chr11 | 12200001 | 12300000 | 1085 | 1186 | 12250000 | -0.20078 | 0.002224741 |
| chr11 | 12250001 | 12350000 | 1053 | 1151 | 12300000 | -0.20075 | 0.002227354 |
| chr11 | 12350001 | 12450000 | 1021 | 869  | 12400000 | 0.160183 | 0.011741191 |
| chr11 | 12600001 | 12700000 | 993  | 854  | 12650000 | 0.145186 | 0.019959382 |
| chr11 | 12850001 | 12950000 | 969  | 1083 | 12900000 | -0.23284 | 0.000492315 |
| chr11 | 12900001 | 13000000 | 977  | 1027 | 12950000 | -0.14438 | 0.020263966 |
| chr11 | 13200001 | 13300000 | 1033 | 1066 | 13250000 | -0.11774 | 0.047343283 |
| chr11 | 13250001 | 13350000 | 1062 | 1158 | 13300000 | -0.19722 | 0.002600509 |
| chr11 | 13550001 | 13650000 | 692  | 719  | 13600000 | -0.12759 | 0.035090436 |
| chr11 | 14300001 | 14400000 | 1020 | 854  | 14350000 | 0.183889 | 0.004686506 |
| chr11 | 14700001 | 14800000 | 877  | 764  | 14750000 | 0.126632 | 0.036469019 |
| chr11 | 14750001 | 14850000 | 833  | 727  | 14800000 | 0.123989 | 0.0395488   |
| chr11 | 14900001 | 15000000 | 1098 | 961  | 14950000 | 0.119898 | 0.044731969 |
| chr11 | 14950001 | 15050000 | 1035 | 892  | 1.50E+07 | 0.142143 | 0.022122583 |
| chr11 | 15000001 | 15100000 | 949  | 825  | 15050000 | 0.129642 | 0.033204712 |
| chr11 | 15200001 | 15300000 | 989  | 1051 | 15250000 | -0.16009 | 0.011588663 |
| chr11 | 15600001 | 15700000 | 1083 | 1138 | 15650000 | -0.14384 | 0.020639779 |
| chr11 | 15800001 | 15900000 | 1178 | 1000 | 15850000 | 0.163968 | 0.010206632 |
| chr11 | 15900001 | 16000000 | 1137 | 1174 | 15950000 | -0.11857 | 0.046189485 |
| chr11 | 16300001 | 16400000 | 1102 | 913  | 16350000 | 0.199066 | 0.002472645 |
| chr11 | 16350001 | 16450000 | 1090 | 896  | 16400000 | 0.210386 | 0.00149507  |
| chr11 | 16450001 | 16550000 | 839  | 724  | 16500000 | 0.140309 | 0.02352014  |
| chr11 | 16500001 | 16600000 | 820  | 687  | 16550000 | 0.182942 | 0.004870849 |
| chr11 | 16550001 | 16650000 | 1003 | 838  | 16600000 | 0.186928 | 0.004136703 |
| chr11 | 16600001 | 16700000 | 944  | 828  | 16650000 | 0.116784 | 0.049033595 |
| chr11 | 16700001 | 16800000 | 905  | 765  | 16750000 | 0.170086 | 0.008095744 |
| chr11 | 16800001 | 16900000 | 1020 | 1103 | 16850000 | -0.18524 | 0.004327461 |
| chr11 | 16950001 | 17050000 | 1023 | 1090 | 1.70E+07 | -0.16389 | 0.010057174 |
| chr11 | 17000001 | 17100000 | 799  | 851  | 17050000 | -0.16334 | 0.01027038  |
| chr11 | 17050001 | 17150000 | 746  | 622  | 17100000 | 0.189889 | 0.003657244 |
| chr11 | 17100001 | 17200000 | 921  | 738  | 17150000 | 0.247209 | 0.00024935  |
| chr11 | 17150001 | 17250000 | 907  | 741  | 17200000 | 0.219257 | 0.00099228  |
| chr11 | 17200001 | 17300000 | 835  | 709  | 17250000 | 0.163619 | 0.010340378 |
| chr11 | 17350001 | 17450000 | 974  | 1041 | 17400000 | -0.16835 | 0.008490557 |
| chr11 | 17400001 | 17500000 | 1051 | 1149 | 17450000 | -0.20099 | 0.00220446  |
| chr11 | 17450001 | 17550000 | 1110 | 1212 | 17500000 | -0.1992  | 0.002384973 |
| chr11 | 17500001 | 17600000 | 1098 | 1220 | 17550000 | -0.22437 | 0.000746269 |
| chr11 | 17650001 | 17750000 | 1115 | 1213 | 17700000 | -0.19391 | 0.003001553 |
| chr11 | 17700001 | 17800000 | 1157 | 1265 | 17750000 | -0.20112 | 0.002191587 |

|       |          |          |      |      |          |          |             |
|-------|----------|----------|------|------|----------|----------|-------------|
| chr11 | 18000001 | 18100000 | 990  | 1025 | 18050000 | -0.1225  | 0.041055961 |
| chr11 | 18300001 | 18400000 | 958  | 792  | 18350000 | 0.202153 | 0.002160355 |
| chr11 | 18350001 | 18450000 | 915  | 776  | 18400000 | 0.165343 | 0.009694075 |
| chr11 | 18500001 | 18600000 | 798  | 863  | 18550000 | -0.18534 | 0.004308113 |
| chr11 | 19350001 | 19450000 | 1113 | 965  | 19400000 | 0.133481 | 0.029395576 |
| chr11 | 20100001 | 20200000 | 1110 | 951  | 20150000 | 0.150671 | 0.016513253 |
| chr11 | 20150001 | 20250000 | 1059 | 873  | 20200000 | 0.206277 | 0.00179923  |
| chr11 | 20200001 | 20300000 | 1046 | 889  | 20250000 | 0.162256 | 0.010877579 |
| chr11 | 21000001 | 21100000 | 1080 | 941  | 21050000 | 0.126393 | 0.036739743 |
| chr11 | 21300001 | 21400000 | 942  | 978  | 21350000 | -0.12648 | 0.036327721 |
| chr11 | 21500001 | 21600000 | 1074 | 934  | 21550000 | 0.129128 | 0.033744885 |
| chr11 | 21600001 | 21700000 | 878  | 905  | 21650000 | -0.11607 | 0.049726666 |
| chr11 | 21800001 | 21900000 | 979  | 858  | 21850000 | 0.117959 | 0.047372683 |
| chr11 | 21850001 | 21950000 | 1014 | 873  | 21900000 | 0.143632 | 0.021040332 |
| chr11 | 22050001 | 22150000 | 1012 | 858  | 22100000 | 0.165788 | 0.009533289 |
| chr11 | 22100001 | 22200000 | 1063 | 909  | 22150000 | 0.153418 | 0.014988486 |
| chr11 | 22200001 | 22300000 | 971  | 1008 | 22250000 | -0.12632 | 0.036502904 |
| chr11 | 22400001 | 22500000 | 1088 | 953  | 22450000 | 0.118759 | 0.046269137 |
| chr11 | 22550001 | 22650000 | 1051 | 909  | 22600000 | 0.137039 | 0.026197462 |
| chr11 | 22850001 | 22950000 | 1015 | 890  | 22900000 | 0.117231 | 0.048397245 |
| chr11 | 22900001 | 23000000 | 926  | 812  | 22950000 | 0.117161 | 0.04849662  |
| chr11 | 23400001 | 23500000 | 980  | 834  | 23450000 | 0.160363 | 0.011664074 |
| chr11 | 23450001 | 23550000 | 940  | 818  | 23500000 | 0.128188 | 0.03475026  |
| chr11 | 23550001 | 23650000 | 1020 | 879  | 23600000 | 0.142262 | 0.022034439 |
| chr11 | 23750001 | 23850000 | 936  | 808  | 23800000 | 0.139781 | 0.023935943 |
| chr11 | 23800001 | 23900000 | 1016 | 866  | 23850000 | 0.15809  | 0.012673382 |
| chr11 | 24000001 | 24100000 | 979  | 840  | 24050000 | 0.148548 | 0.017781174 |
| chr11 | 24050001 | 24150000 | 1059 | 848  | 24100000 | 0.248195 | 0.000236904 |
| chr11 | 24100001 | 24200000 | 1095 | 900  | 24150000 | 0.210562 | 0.001483127 |
| chr11 | 24150001 | 24250000 | 946  | 820  | 24200000 | 0.133845 | 0.029054533 |
| chr11 | 24250001 | 24350000 | 966  | 818  | 24300000 | 0.167551 | 0.008918716 |
| chr11 | 24300001 | 24400000 | 902  | 775  | 24350000 | 0.146559 | 0.019043469 |
| chr11 | 24500001 | 24600000 | 1042 | 869  | 24550000 | 0.189555 | 0.00370867  |
| chr11 | 24550001 | 24650000 | 1046 | 890  | 24600000 | 0.160634 | 0.011548432 |
| chr11 | 24600001 | 24700000 | 1022 | 890  | 24650000 | 0.127146 | 0.035893862 |
| chr11 | 24750001 | 24850000 | 1019 | 854  | 24800000 | 0.182474 | 0.004964232 |
| chr11 | 24800001 | 24900000 | 980  | 815  | 24850000 | 0.19361  | 0.003126073 |
| chr11 | 25000001 | 25100000 | 901  | 782  | 25050000 | 0.131987 | 0.030832624 |
| chr11 | 25050001 | 25150000 | 984  | 847  | 25100000 | 0.143925 | 0.02083327  |
| chr11 | 25150001 | 25250000 | 980  | 846  | 25200000 | 0.139752 | 0.023959084 |
| chr11 | 25200001 | 25300000 | 983  | 843  | 25250000 | 0.149287 | 0.017330497 |
| chr11 | 25850001 | 25950000 | 956  | 809  | 25900000 | 0.168499 | 0.008602617 |
| chr11 | 25900001 | 26000000 | 1038 | 840  | 25950000 | 0.232973 | 0.000512462 |
| chr11 | 26200001 | 26300000 | 1016 | 889  | 26250000 | 0.120273 | 0.044234652 |
| chr11 | 26450001 | 26550000 | 987  | 844  | 26500000 | 0.153435 | 0.014979075 |
| chr11 | 26500001 | 26600000 | 1053 | 884  | 26550000 | 0.180015 | 0.005481971 |
| chr11 | 26550001 | 26650000 | 982  | 829  | 26600000 | 0.171979 | 0.00752581  |

|       |          |          |      |      |          |          |             |
|-------|----------|----------|------|------|----------|----------|-------------|
| chr11 | 26850001 | 26950000 | 1003 | 849  | 26900000 | 0.168113 | 0.00872996  |
| chr11 | 26900001 | 27000000 | 922  | 756  | 26950000 | 0.214009 | 0.001266711 |
| chr11 | 26950001 | 27050000 | 953  | 836  | 2.70E+07 | 0.116602 | 0.04929614  |
| chr11 | 27100001 | 27200000 | 1035 | 897  | 27150000 | 0.134079 | 0.028836197 |
| chr11 | 28000001 | 28100000 | 965  | 823  | 28050000 | 0.157265 | 0.01305804  |
| chr11 | 28050001 | 28150000 | 934  | 810  | 28100000 | 0.133129 | 0.029729075 |
| chr11 | 28100001 | 28200000 | 980  | 858  | 28150000 | 0.119432 | 0.045355137 |
| chr11 | 28150001 | 28250000 | 926  | 754  | 28200000 | 0.224076 | 0.000789658 |
| chr11 | 28200001 | 28300000 | 895  | 679  | 28250000 | 0.326104 | 2.45E-06    |
| chr11 | 28250001 | 28350000 | 942  | 781  | 28300000 | 0.198033 | 0.002585925 |
| chr11 | 28300001 | 28400000 | 947  | 798  | 28350000 | 0.174604 | 0.006794275 |
| chr11 | 28350001 | 28450000 | 914  | 748  | 28400000 | 0.216784 | 0.001113941 |
| chr11 | 28400001 | 28500000 | 978  | 819  | 28450000 | 0.183599 | 0.004742293 |
| chr11 | 28900001 | 29000000 | 985  | 829  | 28950000 | 0.17638  | 0.006335764 |
| chr11 | 29300001 | 29400000 | 1026 | 886  | 29350000 | 0.13928  | 0.024336381 |
| chr11 | 29350001 | 29450000 | 952  | 811  | 29400000 | 0.158888 | 0.012310613 |
| chr11 | 29500001 | 29600000 | 1082 | 910  | 29550000 | 0.17739  | 0.006087348 |
| chr11 | 29550001 | 29650000 | 1082 | 917  | 29600000 | 0.166335 | 0.009338661 |
| chr11 | 30000001 | 30100000 | 993  | 863  | 30050000 | 0.130061 | 0.032769848 |
| chr11 | 30050001 | 30150000 | 907  | 783  | 30100000 | 0.139718 | 0.023985974 |
| chr11 | 30150001 | 30250000 | 961  | 1004 | 30200000 | -0.13552 | 0.027238129 |
| chr11 | 30950001 | 31050000 | 1032 | 905  | 3.10E+07 | 0.117082 | 0.048609211 |
| chr11 | 31200001 | 31300000 | 1033 | 899  | 31250000 | 0.128075 | 0.034872466 |
| chr11 | 31500001 | 31600000 | 904  | 793  | 31550000 | 0.11663  | 0.049254943 |
| chr11 | 31550001 | 31650000 | 967  | 796  | 31600000 | 0.208376 | 0.001637453 |
| chr11 | 31600001 | 31700000 | 1066 | 859  | 31650000 | 0.239106 | 0.000377367 |
| chr11 | 31650001 | 31750000 | 988  | 834  | 31700000 | 0.172092 | 0.007493013 |
| chr11 | 31700001 | 31800000 | 898  | 770  | 31750000 | 0.149485 | 0.017211336 |
| chr11 | 31800001 | 31900000 | 1013 | 1076 | 31850000 | -0.15942 | 0.011881415 |
| chr11 | 32350001 | 32450000 | 934  | 989  | 32400000 | -0.15492 | 0.013995867 |
| chr11 | 32400001 | 32500000 | 946  | 1058 | 32450000 | -0.2338  | 0.000469175 |
| chr11 | 32650001 | 32750000 | 921  | 798  | 32700000 | 0.134441 | 0.028502415 |
| chr11 | 32750001 | 32850000 | 805  | 697  | 32800000 | 0.135458 | 0.027580097 |
| chr11 | 32800001 | 32900000 | 942  | 796  | 32850000 | 0.170587 | 0.007941434 |
| chr11 | 33200001 | 33300000 | 881  | 772  | 33250000 | 0.118169 | 0.047080747 |
| chr11 | 33250001 | 33350000 | 919  | 800  | 33300000 | 0.127693 | 0.035289805 |
| chr11 | 33650001 | 33750000 | 984  | 1034 | 33700000 | -0.14388 | 0.020612605 |
| chr11 | 34150001 | 34250000 | 1033 | 1119 | 34200000 | -0.18774 | 0.003898662 |
| chr11 | 34350001 | 34450000 | 939  | 979  | 34400000 | -0.13256 | 0.02998412  |
| chr11 | 34450001 | 34550000 | 981  | 1082 | 34500000 | -0.21375 | 0.001235727 |
| chr11 | 34500001 | 34600000 | 1015 | 1155 | 34550000 | -0.25878 | 0.000126964 |
| chr11 | 34800001 | 34900000 | 1061 | 925  | 34850000 | 0.125528 | 0.037731549 |
| chr11 | 35700001 | 35800000 | 889  | 767  | 35750000 | 0.140585 | 0.023305388 |
| chr11 | 36500001 | 36600000 | 905  | 754  | 36550000 | 0.190981 | 0.003493458 |
| chr11 | 36550001 | 36650000 | 1009 | 855  | 36600000 | 0.166558 | 0.009260343 |
| chr11 | 37100001 | 37200000 | 1031 | 896  | 37150000 | 0.130102 | 0.032728046 |
| chr11 | 37150001 | 37250000 | 999  | 872  | 37200000 | 0.123785 | 0.039795791 |

|       |          |          |      |      |          |          |             |
|-------|----------|----------|------|------|----------|----------|-------------|
| chr11 | 37400001 | 37500000 | 981  | 773  | 37450000 | 0.271413 | 6.76E-05    |
| chr11 | 37450001 | 37550000 | 922  | 787  | 37500000 | 0.156031 | 0.013652022 |
| chr11 | 37500001 | 37600000 | 1024 | 853  | 37550000 | 0.191226 | 0.003457667 |
| chr11 | 37550001 | 37650000 | 1077 | 855  | 37600000 | 0.26065  | 0.000122294 |
| chr11 | 37700001 | 37800000 | 1065 | 875  | 37750000 | 0.211127 | 0.001445505 |
| chr11 | 37750001 | 37850000 | 1059 | 891  | 37800000 | 0.176833 | 0.006223145 |
| chr11 | 37850001 | 37950000 | 1036 | 876  | 37900000 | 0.169649 | 0.008232552 |
| chr11 | 37900001 | 38000000 | 1067 | 845  | 37950000 | 0.264165 | 0.000100986 |
| chr11 | 38050001 | 38150000 | 978  | 817  | 38100000 | 0.187127 | 0.004102812 |
| chr11 | 38100001 | 38200000 | 981  | 842  | 38150000 | 0.148061 | 0.018083286 |
| chr11 | 38150001 | 38250000 | 950  | 825  | 38200000 | 0.131162 | 0.031650847 |
| chr11 | 38250001 | 38350000 | 994  | 849  | 38300000 | 0.15511  | 0.014111098 |
| chr11 | 38300001 | 38400000 | 1043 | 855  | 38350000 | 0.214371 | 0.001245731 |
| chr11 | 38500001 | 38600000 | 977  | 831  | 38550000 | 0.161138 | 0.011336009 |
| chr11 | 38650001 | 38750000 | 986  | 851  | 38700000 | 0.140057 | 0.023718342 |
| chr11 | 38900001 | 39000000 | 1007 | 850  | 38950000 | 0.172157 | 0.00747408  |
| chr11 | 38950001 | 39050000 | 1059 | 829  | 3.90E+07 | 0.280887 | 3.95E-05    |
| chr11 | 39000001 | 39100000 | 1025 | 824  | 39050000 | 0.242536 | 0.000317093 |
| chr11 | 39050001 | 39150000 | 989  | 805  | 39100000 | 0.22461  | 0.000769727 |
| chr11 | 39100001 | 39200000 | 982  | 803  | 39150000 | 0.217951 | 0.001054911 |
| chr11 | 39750001 | 39850000 | 836  | 721  | 39800000 | 0.141132 | 0.022884375 |
| chr11 | 39800001 | 39900000 | 856  | 749  | 39850000 | 0.120273 | 0.044234652 |
| chr11 | 40750001 | 40850000 | 1019 | 865  | 40800000 | 0.16401  | 0.010190457 |
| chr11 | 40800001 | 40900000 | 1008 | 879  | 40850000 | 0.125189 | 0.03812583  |
| chr11 | 41100001 | 41200000 | 1040 | 899  | 41150000 | 0.137819 | 0.025536742 |
| chr11 | 41600001 | 41700000 | 950  | 781  | 41650000 | 0.210233 | 0.001505464 |
| chr11 | 41650001 | 41750000 | 917  | 737  | 41700000 | 0.242885 | 0.000311485 |
| chr11 | 41700001 | 41800000 | 860  | 705  | 41750000 | 0.214342 | 0.001247423 |
| chr11 | 41750001 | 41850000 | 907  | 749  | 41800000 | 0.203765 | 0.002012026 |
| chr11 | 41800001 | 41900000 | 1037 | 892  | 41850000 | 0.144929 | 0.02013512  |
| chr11 | 41950001 | 42050000 | 1065 | 922  | 4.20E+07 | 0.135643 | 0.027415463 |
| chr11 | 42000001 | 42100000 | 1095 | 921  | 42050000 | 0.177286 | 0.006112569 |
| chr11 | 42050001 | 42150000 | 1061 | 858  | 42100000 | 0.234003 | 0.000487012 |
| chr11 | 42100001 | 42200000 | 1048 | 834  | 42150000 | 0.257148 | 0.000147684 |
| chr11 | 42150001 | 42250000 | 956  | 803  | 42200000 | 0.179239 | 0.005655198 |
| chr11 | 42750001 | 42850000 | 1076 | 937  | 42800000 | 0.127185 | 0.035850319 |
| chr11 | 43300001 | 43400000 | 883  | 919  | 43350000 | -0.13002 | 0.032506056 |
| chr11 | 43350001 | 43450000 | 867  | 954  | 43400000 | -0.21033 | 0.001447123 |
| chr11 | 43600001 | 43700000 | 1009 | 885  | 43650000 | 0.116805 | 0.049003907 |
| chr11 | 43750001 | 43850000 | 961  | 832  | 43800000 | 0.135581 | 0.027470537 |
| chr11 | 43950001 | 44050000 | 1000 | 1032 | 4.40E+07 | -0.11781 | 0.047237358 |
| chr11 | 44250001 | 44350000 | 1075 | 1109 | 44300000 | -0.11729 | 0.047968363 |
| chr11 | 44400001 | 44500000 | 977  | 1039 | 44450000 | -0.16114 | 0.011148706 |
| chr11 | 44450001 | 44550000 | 997  | 1060 | 44500000 | -0.16077 | 0.011301258 |
| chr11 | 44650001 | 44750000 | 1057 | 1096 | 44700000 | -0.12464 | 0.038446911 |
| chr11 | 44750001 | 44850000 | 1110 | 1173 | 44800000 | -0.15202 | 0.01552856  |
| chr11 | 44800001 | 44900000 | 1116 | 1171 | 44850000 | -0.14178 | 0.022135232 |

|       |          |          |      |      |          |          |             |
|-------|----------|----------|------|------|----------|----------|-------------|
| chr11 | 44850001 | 44950000 | 1126 | 1216 | 44900000 | -0.18331 | 0.004685456 |
| chr11 | 44900001 | 45000000 | 1104 | 1224 | 44950000 | -0.22124 | 0.000867989 |
| chr11 | 44950001 | 45050000 | 1013 | 1065 | 4.50E+07 | -0.14459 | 0.020116529 |
| chr11 | 45000001 | 45100000 | 975  | 1031 | 45050000 | -0.15294 | 0.015024496 |
| chr11 | 45150001 | 45250000 | 1121 | 1204 | 45200000 | -0.17542 | 0.006442097 |
| chr11 | 45200001 | 45300000 | 1058 | 1165 | 45250000 | -0.21136 | 0.001379983 |
| chr11 | 45500001 | 45600000 | 1135 | 1174 | 45550000 | -0.12111 | 0.042810393 |
| chr11 | 45650001 | 45750000 | 1131 | 1167 | 45700000 | -0.11758 | 0.047569716 |
| chr11 | 45750001 | 45850000 | 902  | 989  | 45800000 | -0.20521 | 0.001825676 |
| chr11 | 45800001 | 45900000 | 922  | 990  | 45850000 | -0.17503 | 0.006541751 |
| chr11 | 45850001 | 45950000 | 1032 | 1169 | 45900000 | -0.2522  | 0.000181085 |
| chr11 | 45900001 | 46000000 | 1028 | 1135 | 45950000 | -0.21522 | 0.001153495 |
| chr11 | 46200001 | 46300000 | 929  | 972  | 46250000 | -0.13765 | 0.025402015 |
| chr11 | 46300001 | 46400000 | 991  | 1086 | 46350000 | -0.20444 | 0.001890419 |
| chr11 | 46350001 | 46450000 | 978  | 1100 | 46400000 | -0.24197 | 0.000309771 |
| chr11 | 46800001 | 46900000 | 1016 | 846  | 46850000 | 0.191799 | 0.003375216 |
| chr11 | 46850001 | 46950000 | 988  | 859  | 46900000 | 0.129481 | 0.033373055 |
| chr11 | 47150001 | 47250000 | 886  | 998  | 47200000 | -0.2441  | 0.000277364 |
| chr11 | 47200001 | 47300000 | 866  | 959  | 47250000 | -0.21954 | 0.000941275 |
| chr11 | 47300001 | 47400000 | 972  | 1054 | 47350000 | -0.18922 | 0.003664226 |
| chr11 | 47350001 | 47450000 | 980  | 1057 | 47400000 | -0.18149 | 0.005046518 |
| chr11 | 47650001 | 47750000 | 841  | 732  | 47700000 | 0.12789  | 0.035073962 |
| chr11 | 47700001 | 47800000 | 806  | 692  | 47750000 | 0.147636 | 0.018350785 |
| chr11 | 47800001 | 47900000 | 855  | 724  | 47850000 | 0.167563 | 0.008914527 |
| chr11 | 47850001 | 47950000 | 845  | 723  | 47900000 | 0.152584 | 0.015437871 |
| chr11 | 48050001 | 48150000 | 905  | 991  | 48100000 | -0.20334 | 0.001985777 |
| chr11 | 48750001 | 48850000 | 536  | 557  | 48800000 | -0.12782 | 0.034844865 |
| chr11 | 49000001 | 49100000 | 234  | 185  | 49050000 | 0.266611 | 8.83E-05    |
| chr11 | 49050001 | 49150000 | 250  | 205  | 49100000 | 0.213932 | 0.001271172 |
| chr11 | 49200001 | 49300000 | 275  | 237  | 49250000 | 0.142173 | 0.02210076  |
| chr11 | 49400001 | 49500000 | 287  | 304  | 49450000 | -0.15539 | 0.013759268 |
| chr11 | 49500001 | 49600000 | 312  | 271  | 49550000 | 0.130881 | 0.031932791 |
| chr11 | 49550001 | 49650000 | 293  | 249  | 49600000 | 0.162383 | 0.010826358 |
| chr11 | 49600001 | 49700000 | 271  | 237  | 49650000 | 0.121034 | 0.043240496 |
| chr11 | 49750001 | 49850000 | 229  | 196  | 49800000 | 0.152122 | 0.015691725 |
| chr11 | 50050001 | 50150000 | 408  | 423  | 50100000 | -0.12446 | 0.038664764 |
| chr11 | 50100001 | 50200000 | 544  | 565  | 50150000 | -0.12702 | 0.035726208 |
| chr11 | 50150001 | 50250000 | 590  | 619  | 50200000 | -0.1416  | 0.022269632 |
| chr11 | 50300001 | 50400000 | 703  | 559  | 50350000 | 0.258305 | 0.000138794 |
| chr11 | 50350001 | 50450000 | 845  | 705  | 50400000 | 0.188956 | 0.00380259  |
| chr11 | 50450001 | 50550000 | 824  | 706  | 50500000 | 0.150604 | 0.016551631 |
| chr11 | 50500001 | 50600000 | 782  | 673  | 50550000 | 0.14419  | 0.020646486 |
| chr11 | 50600001 | 50700000 | 696  | 741  | 50650000 | -0.16276 | 0.010494997 |
| chr11 | 50750001 | 50850000 | 233  | 254  | 50800000 | -0.19687 | 0.002640762 |
| chr11 | 51000001 | 51100000 | 0    | 1    | 51050000 | #NAME?   | 1.59E-189   |
| chr11 | 51050001 | 51150000 | 0    | 1    | 51100000 | #NAME?   | 1.59E-189   |
| chr11 | 51150001 | 51250000 | 452  | 381  | 51200000 | 0.17416  | 0.006913381 |

|       |          |          |      |      |          |          |             |
|-------|----------|----------|------|------|----------|----------|-------------|
| chr11 | 51200001 | 51300000 | 670  | 556  | 51250000 | 0.196704 | 0.002738507 |
| chr11 | 54650001 | 54750000 | 6    | 4    | 54700000 | 0.512591 | 8.10E-13    |
| chr11 | 54700001 | 54800000 | 49   | 41   | 54750000 | 0.184786 | 0.004517809 |
| chr11 | 55050001 | 55150000 | 659  | 563  | 55100000 | 0.154772 | 0.014282615 |
| chr11 | 55100001 | 55200000 | 855  | 735  | 55150000 | 0.145808 | 0.019539702 |
| chr11 | 55200001 | 55300000 | 677  | 702  | 55250000 | -0.12469 | 0.038396386 |
| chr11 | 55300001 | 55400000 | 895  | 770  | 55350000 | 0.144657 | 0.020321616 |
| chr11 | 55350001 | 55450000 | 982  | 821  | 55400000 | 0.185969 | 0.004303579 |
| chr11 | 55400001 | 55500000 | 991  | 806  | 55450000 | 0.225733 | 0.000729308 |
| chr11 | 55650001 | 55750000 | 905  | 780  | 55700000 | 0.142072 | 0.022175707 |
| chr11 | 55700001 | 55800000 | 941  | 777  | 55750000 | 0.203908 | 0.001999298 |
| chr11 | 55750001 | 55850000 | 915  | 749  | 55800000 | 0.216434 | 0.001132219 |
| chr11 | 55800001 | 55900000 | 929  | 752  | 55850000 | 0.232574 | 0.000522656 |
| chr11 | 55850001 | 55950000 | 945  | 779  | 55900000 | 0.206319 | 0.001795856 |
| chr11 | 56100001 | 56200000 | 1025 | 877  | 56150000 | 0.152603 | 0.015427247 |
| chr11 | 56150001 | 56250000 | 1030 | 858  | 56200000 | 0.191223 | 0.003458145 |
| chr11 | 56750001 | 56850000 | 941  | 813  | 56800000 | 0.138568 | 0.02491566  |
| chr11 | 57000001 | 57100000 | 1059 | 1110 | 57050000 | -0.14023 | 0.023315714 |
| chr11 | 57050001 | 57150000 | 1067 | 1138 | 57100000 | -0.16531 | 0.009532896 |
| chr11 | 57400001 | 57500000 | 882  | 768  | 57450000 | 0.127301 | 0.035722484 |
| chr11 | 57450001 | 57550000 | 854  | 729  | 57500000 | 0.155945 | 0.013694228 |
| chr11 | 57600001 | 57700000 | 802  | 834  | 57650000 | -0.12882 | 0.033767701 |
| chr11 | 57750001 | 57850000 | 845  | 723  | 57800000 | 0.152584 | 0.015437871 |
| chr11 | 58050001 | 58150000 | 956  | 800  | 58100000 | 0.184639 | 0.004545129 |
| chr11 | 58450001 | 58550000 | 969  | 807  | 58500000 | 0.191556 | 0.003409955 |
| chr11 | 58550001 | 58650000 | 705  | 739  | 58600000 | -0.14032 | 0.023242481 |
| chr11 | 59450001 | 59550000 | 903  | 956  | 59500000 | -0.15466 | 0.014129219 |
| chr11 | 59500001 | 59600000 | 941  | 991  | 59550000 | -0.14706 | 0.018475707 |
| chr11 | 60050001 | 60150000 | 984  | 846  | 60100000 | 0.145629 | 0.019659947 |
| chr11 | 60300001 | 60400000 | 723  | 760  | 60350000 | -0.14438 | 0.020265312 |
| chr11 | 60450001 | 60550000 | 966  | 1084 | 60500000 | -0.23864 | 0.000367366 |
| chr11 | 60500001 | 60600000 | 997  | 1049 | 60550000 | -0.14572 | 0.019351421 |
| chr11 | 60550001 | 60650000 | 996  | 1051 | 60600000 | -0.14992 | 0.016723706 |
| chr11 | 60700001 | 60800000 | 1022 | 1099 | 60750000 | -0.17717 | 0.006009151 |
| chr11 | 60750001 | 60850000 | 1019 | 1080 | 60800000 | -0.15625 | 0.01333921  |
| chr11 | 60850001 | 60950000 | 973  | 1034 | 60900000 | -0.1601  | 0.011586851 |
| chr11 | 61250001 | 61350000 | 1178 | 1319 | 61300000 | -0.23548 | 0.000431257 |
| chr11 | 61300001 | 61400000 | 1149 | 1240 | 61350000 | -0.18233 | 0.004876486 |
| chr11 | 61400001 | 61500000 | 1023 | 1113 | 61450000 | -0.19402 | 0.002987193 |
| chr11 | 61450001 | 61550000 | 1152 | 1308 | 61500000 | -0.25559 | 0.000150964 |
| chr11 | 61500001 | 61600000 | 1079 | 1182 | 61550000 | -0.20391 | 0.001936007 |
| chr11 | 61600001 | 61700000 | 1034 | 1073 | 61650000 | -0.12579 | 0.037117102 |
| chr11 | 61650001 | 61750000 | 962  | 1052 | 61700000 | -0.2014  | 0.002164837 |
| chr11 | 61700001 | 61800000 | 829  | 866  | 61750000 | -0.13537 | 0.027377078 |
| chr11 | 62050001 | 62150000 | 726  | 751  | 62100000 | -0.12122 | 0.042677387 |
| chr11 | 62400001 | 62500000 | 828  | 878  | 62450000 | -0.15696 | 0.012998154 |
| chr11 | 62950001 | 63050000 | 742  | 622  | 6.30E+07 | 0.182133 | 0.005033413 |

|       |          |          |      |      |          |          |             |             |
|-------|----------|----------|------|------|----------|----------|-------------|-------------|
| chr11 | 63300001 | 63400000 | 958  | 826  | 63350000 | 0.141512 | 0.02259547  |             |
| chr11 | 63350001 | 63450000 | 883  | 772  | 63400000 | 0.121441 | 0.042716342 |             |
| chr11 | 63600001 | 63700000 | 973  | 1012 | 63650000 | -0.12907 | 0.033500392 |             |
| chr11 | 63700001 | 63800000 | 939  | 1065 | 63750000 | -0.25403 | 0.000164237 |             |
| chr11 | 63750001 | 63850000 | 1037 | 1329 | 63800000 | -0.4303  | 8.64E-10    |             |
| chr11 | 63800001 | 63900000 | 1069 | 1296 | 63850000 | -0.35018 | 4.18E-07    |             |
| chr11 | 63850001 | 63950000 | 979  | 1095 | 63900000 | -0.23392 | 0.000466303 |             |
| chr11 | 63900001 | 64000000 | 890  | 1001 | 63950000 | -0.24194 | 0.000310289 |             |
| chr11 | 63950001 | 64050000 | 907  | 1105 | 64000000 | 6.40E+07 | -0.35724    | 2.53E-07    |
| chr11 | 64000001 | 64100000 | 944  | 1137 | 64050000 | -0.34075 | 8.06E-07    |             |
| chr11 | 64050001 | 64150000 | 940  | 1128 | 64100000 | -0.33541 | 1.16E-06    |             |
| chr11 | 64100001 | 64200000 | 961  | 1083 | 64150000 | -0.2448  | 0.000267567 |             |
| chr11 | 64250001 | 64350000 | 1075 | 1123 | 64300000 | -0.13539 | 0.027353573 |             |
| chr11 | 64300001 | 64400000 | 1102 | 1286 | 64350000 | -0.29514 | 1.56E-05    |             |
| chr11 | 64350001 | 64450000 | 1129 | 1348 | 64400000 | -0.32815 | 1.89E-06    |             |
| chr11 | 64400001 | 64500000 | 1144 | 1268 | 64450000 | -0.22084 | 0.000884566 |             |
| chr11 | 64450001 | 64550000 | 1051 | 1167 | 64500000 | -0.22341 | 0.000781746 |             |
| chr11 | 64500001 | 64600000 | 937  | 1098 | 64550000 | -0.30113 | 1.08E-05    |             |
| chr11 | 64550001 | 64650000 | 943  | 1160 | 64600000 | -0.37117 | 9.17E-08    |             |
| chr11 | 64600001 | 64700000 | 1012 | 1212 | 64650000 | -0.33255 | 1.41E-06    |             |
| chr11 | 64650001 | 64750000 | 947  | 1027 | 64700000 | -0.18937 | 0.003640647 |             |
| chr11 | 64700001 | 64800000 | 831  | 876  | 64750000 | -0.14845 | 0.017602703 |             |
| chr11 | 64900001 | 65000000 | 944  | 980  | 64950000 | -0.12637 | 0.036454846 |             |
| chr11 | 64950001 | 65050000 | 906  | 950  | 65000000 | 6.50E+07 | -0.14079    | 0.022882866 |
| chr11 | 65100001 | 65200000 | 929  | 977  | 65150000 | -0.14505 | 0.019801541 |             |
| chr11 | 65150001 | 65250000 | 869  | 900  | 65200000 | -0.12294 | 0.040503757 |             |
| chr11 | 65300001 | 65400000 | 1080 | 1192 | 65350000 | -0.21472 | 0.001180711 |             |
| chr11 | 65350001 | 65450000 | 1039 | 1166 | 65400000 | -0.23874 | 0.000365452 |             |
| chr11 | 65400001 | 65500000 | 912  | 961  | 65450000 | -0.14787 | 0.017961921 |             |
| chr11 | 65550001 | 65650000 | 948  | 1033 | 65600000 | -0.19625 | 0.002712518 |             |
| chr11 | 65600001 | 65700000 | 925  | 1068 | 65650000 | -0.27976 | 3.89E-05    |             |
| chr11 | 65650001 | 65750000 | 914  | 1041 | 65700000 | -0.26008 | 0.000118316 |             |
| chr11 | 65700001 | 65800000 | 927  | 971  | 65750000 | -0.13927 | 0.024070762 |             |
| chr11 | 65950001 | 66050000 | 1001 | 1081 | 66000000 | 6.60E+07 | -0.1833     | 0.004687737 |
| chr11 | 66000001 | 66100000 | 1022 | 1172 | 66050000 | -0.26995 | 6.83E-05    |             |
| chr11 | 66050001 | 66150000 | 962  | 1115 | 66100000 | -0.28531 | 2.81E-05    |             |
| chr11 | 66100001 | 66200000 | 925  | 1009 | 66150000 | -0.19777 | 0.002538953 |             |
| chr11 | 66150001 | 66250000 | 881  | 970  | 66200000 | -0.21121 | 0.001389397 |             |
| chr11 | 66200001 | 66300000 | 880  | 957  | 66250000 | -0.19339 | 0.003069344 |             |
| chr11 | 66250001 | 66350000 | 904  | 965  | 66300000 | -0.16658 | 0.00908541  |             |
| chr11 | 66300001 | 66400000 | 888  | 916  | 66350000 | -0.11716 | 0.048159216 |             |
| chr11 | 66350001 | 66450000 | 857  | 889  | 66400000 | -0.12526 | 0.037724758 |             |
| chr11 | 66400001 | 66500000 | 923  | 1013 | 66450000 | -0.2066  | 0.001714843 |             |
| chr11 | 66800001 | 66900000 | 794  | 828  | 66850000 | -0.13286 | 0.029688724 |             |
| chr11 | 67000001 | 67100000 | 1014 | 1177 | 67050000 | -0.28743 | 2.48E-05    |             |
| chr11 | 67050001 | 67150000 | 1014 | 1074 | 67100000 | -0.15531 | 0.013801188 |             |
| chr11 | 67150001 | 67250000 | 1013 | 1056 | 67200000 | -0.13235 | 0.030184989 |             |

|       |          |          |      |      |          |          |             |
|-------|----------|----------|------|------|----------|----------|-------------|
| chr11 | 67200001 | 67300000 | 985  | 1079 | 67250000 | -0.20387 | 0.001939122 |
| chr11 | 67250001 | 67350000 | 907  | 1002 | 67300000 | -0.21608 | 0.001108155 |
| chr11 | 67300001 | 67400000 | 809  | 891  | 67350000 | -0.21166 | 0.001361315 |
| chr11 | 67350001 | 67450000 | 855  | 958  | 67400000 | -0.23647 | 0.000410108 |
| chr11 | 67400001 | 67500000 | 645  | 714  | 67450000 | -0.219   | 0.000965675 |
| chr11 | 67450001 | 67550000 | 311  | 333  | 67500000 | -0.17098 | 0.007669697 |
| chr11 | 67500001 | 67600000 | 159  | 174  | 67550000 | -0.20243 | 0.00206766  |
| chr11 | 67600001 | 67700000 | 83   | 63   | 67650000 | 0.325388 | 2.57E-06    |
| chr11 | 67700001 | 67800000 | 446  | 569  | 67750000 | -0.42376 | 1.49E-09    |
| chr11 | 67750001 | 67850000 | 925  | 1057 | 67800000 | -0.26482 | 9.11E-05    |
| chr11 | 68050001 | 68150000 | 902  | 972  | 68100000 | -0.1802  | 0.005318698 |
| chr11 | 68100001 | 68200000 | 950  | 1064 | 68150000 | -0.23587 | 0.000422781 |
| chr11 | 68150001 | 68250000 | 953  | 1002 | 68200000 | -0.14471 | 0.020037415 |
| chr11 | 68350001 | 68450000 | 882  | 911  | 68400000 | -0.11904 | 0.045545471 |
| chr11 | 68400001 | 68500000 | 958  | 1055 | 68450000 | -0.21152 | 0.001370152 |
| chr11 | 68450001 | 68550000 | 1013 | 1087 | 68500000 | -0.17409 | 0.00679037  |
| chr11 | 68500001 | 68600000 | 924  | 987  | 68550000 | -0.16753 | 0.008761424 |
| chr11 | 68550001 | 68650000 | 857  | 957  | 68600000 | -0.2316  | 0.000523703 |
| chr11 | 68650001 | 68750000 | 986  | 1053 | 68700000 | -0.16722 | 0.008866351 |
| chr11 | 68700001 | 68800000 | 955  | 1113 | 68750000 | -0.29325 | 1.74E-05    |
| chr11 | 68750001 | 68850000 | 979  | 1127 | 68800000 | -0.27548 | 4.98E-05    |
| chr11 | 68800001 | 68900000 | 1045 | 1213 | 68850000 | -0.28745 | 2.47E-05    |
| chr11 | 68850001 | 68950000 | 1081 | 1177 | 68900000 | -0.19512 | 0.002848899 |
| chr11 | 69000001 | 69100000 | 1070 | 1121 | 69050000 | -0.13955 | 0.02385246  |
| chr11 | 69150001 | 69250000 | 1073 | 1169 | 69200000 | -0.196   | 0.002742845 |
| chr11 | 69200001 | 69300000 | 1046 | 1199 | 69250000 | -0.26932 | 7.08E-05    |
| chr11 | 69250001 | 69350000 | 1105 | 1238 | 69300000 | -0.23634 | 0.000412943 |
| chr11 | 69400001 | 69500000 | 1056 | 1122 | 69450000 | -0.15983 | 0.011699331 |
| chr11 | 69450001 | 69550000 | 984  | 1025 | 69500000 | -0.13127 | 0.031247765 |
| chr11 | 69550001 | 69650000 | 982  | 1085 | 69600000 | -0.21627 | 0.001098209 |
| chr11 | 69600001 | 69700000 | 1047 | 1140 | 69650000 | -0.19514 | 0.002845876 |
| chr11 | 69650001 | 69750000 | 785  | 813  | 69700000 | -0.12293 | 0.040511312 |
| chr11 | 69700001 | 69800000 | 511  | 559  | 69750000 | -0.2019  | 0.002117454 |
| chr11 | 69750001 | 69850000 | 787  | 838  | 69800000 | -0.16296 | 0.010416567 |
| chr11 | 69800001 | 69900000 | 1064 | 1134 | 69850000 | -0.16429 | 0.009906641 |
| chr11 | 69850001 | 69950000 | 1039 | 1137 | 69900000 | -0.20241 | 0.002069863 |
| chr11 | 69900001 | 70000000 | 1015 | 1125 | 69950000 | -0.22082 | 0.000885513 |
| chr11 | 69950001 | 70050000 | 1013 | 1151 | 7.00E+07 | -0.25663 | 0.000142773 |
| chr11 | 70000001 | 70100000 | 916  | 998  | 70050000 | -0.19606 | 0.002734849 |
| chr11 | 70250001 | 70350000 | 1058 | 1108 | 70300000 | -0.13899 | 0.024298962 |
| chr11 | 70300001 | 70400000 | 1081 | 1182 | 70350000 | -0.20124 | 0.002180462 |
| chr11 | 70350001 | 70450000 | 1034 | 1102 | 70400000 | -0.16426 | 0.009919512 |
| chr11 | 70400001 | 70500000 | 997  | 1083 | 70450000 | -0.19174 | 0.003293164 |
| chr11 | 70450001 | 70550000 | 1051 | 1184 | 70500000 | -0.24428 | 0.000274879 |
| chr11 | 70500001 | 70600000 | 1084 | 1229 | 70550000 | -0.25349 | 0.000169029 |
| chr11 | 70550001 | 70650000 | 1080 | 1170 | 70600000 | -0.18785 | 0.003881164 |
| chr11 | 70600001 | 70700000 | 1105 | 1156 | 70650000 | -0.13747 | 0.025555546 |



|       |          |          |      |      |          |          |             |
|-------|----------|----------|------|------|----------|----------|-------------|
| chr11 | 70650001 | 70750000 | 1095 | 1163 | 70700000 | -0.15929 | 0.011935638 |
| chr11 | 70700001 | 70800000 | 1015 | 1105 | 70750000 | -0.19494 | 0.002871261 |
| chr11 | 70750001 | 70850000 | 900  | 978  | 70800000 | -0.19228 | 0.003218011 |
| chr11 | 70800001 | 70900000 | 815  | 880  | 70850000 | -0.18308 | 0.004730473 |
| chr11 | 70850001 | 70950000 | 899  | 1010 | 70900000 | -0.24033 | 0.000336926 |
| chr11 | 70900001 | 71000000 | 1004 | 1072 | 70950000 | -0.16692 | 0.008968581 |
| chr11 | 71050001 | 71150000 | 1078 | 1215 | 71100000 | -0.24497 | 0.00026515  |
| chr11 | 71100001 | 71200000 | 1030 | 1147 | 71150000 | -0.22759 | 0.000638039 |
| chr11 | 71300001 | 71400000 | 108  | 129  | 71350000 | -0.32871 | 1.82E-06    |
| chr11 | 71350001 | 71450000 | 78   | 88   | 71400000 | -0.2464  | 0.000246073 |
| chr11 | 71450001 | 71550000 | 117  | 145  | 71500000 | -0.38192 | 4.10E-08    |
| chr11 | 71550001 | 71650000 | 390  | 332  | 71600000 | 0.159919 | 0.011855322 |
| chr11 | 72300001 | 72400000 | 1215 | 1338 | 72350000 | -0.21149 | 0.001371646 |
| chr11 | 72350001 | 72450000 | 1169 | 1296 | 72400000 | -0.22116 | 0.000871009 |
| chr11 | 72400001 | 72500000 | 1050 | 1318 | 72450000 | -0.40033 | 9.87E-09    |
| chr11 | 72450001 | 72550000 | 937  | 1198 | 72500000 | -0.42688 | 1.15E-09    |
| chr11 | 72650001 | 72750000 | 948  | 821  | 72700000 | 0.135133 | 0.027872141 |
| chr11 | 72800001 | 72900000 | 1002 | 1034 | 72850000 | -0.11773 | 0.047362181 |
| chr11 | 72850001 | 72950000 | 1073 | 1124 | 72900000 | -0.13936 | 0.023998745 |
| chr11 | 72950001 | 73050000 | 1034 | 1084 | 7.30E+07 | -0.1405  | 0.023104783 |
| chr11 | 73000001 | 73100000 | 1061 | 1244 | 73050000 | -0.30193 | 1.02E-05    |
| chr11 | 73050001 | 73150000 | 1051 | 1209 | 73100000 | -0.27442 | 5.30E-05    |
| chr11 | 73100001 | 73200000 | 990  | 1041 | 73150000 | -0.14484 | 0.019944818 |
| chr11 | 74100001 | 74200000 | 915  | 961  | 74150000 | -0.14314 | 0.021139112 |
| chr11 | 74150001 | 74250000 | 851  | 907  | 74200000 | -0.16432 | 0.009898829 |
| chr11 | 74350001 | 74450000 | 1054 | 1116 | 74400000 | -0.15483 | 0.014039201 |
| chr11 | 74400001 | 74500000 | 951  | 1018 | 74450000 | -0.17059 | 0.007785944 |
| chr11 | 75000001 | 75100000 | 935  | 965  | 75050000 | -0.11793 | 0.047070574 |
| chr11 | 75050001 | 75150000 | 863  | 953  | 75100000 | -0.21549 | 0.001139354 |
| chr11 | 75100001 | 75200000 | 976  | 1128 | 75150000 | -0.28119 | 3.58E-05    |
| chr11 | 75150001 | 75250000 | 1071 | 1205 | 75200000 | -0.24245 | 0.000302234 |
| chr11 | 75200001 | 75300000 | 1025 | 1150 | 75250000 | -0.23838 | 0.000372257 |
| chr11 | 75250001 | 75350000 | 1061 | 1158 | 75300000 | -0.19858 | 0.002450641 |
| chr11 | 75300001 | 75400000 | 1006 | 1069 | 75350000 | -0.16    | 0.011626693 |
| chr11 | 75350001 | 75450000 | 927  | 1017 | 75400000 | -0.20605 | 0.001758241 |
| chr11 | 75400001 | 75500000 | 974  | 1039 | 75450000 | -0.16557 | 0.009438864 |
| chr11 | 75500001 | 75600000 | 918  | 949  | 75550000 | -0.12029 | 0.043886826 |
| chr11 | 75600001 | 75700000 | 1049 | 880  | 75650000 | 0.181067 | 0.005254826 |
| chr11 | 75800001 | 75900000 | 1020 | 1108 | 75850000 | -0.19176 | 0.003290235 |
| chr11 | 75850001 | 75950000 | 1088 | 1261 | 75900000 | -0.28526 | 2.82E-05    |
| chr11 | 75900001 | 76000000 | 1115 | 1206 | 75950000 | -0.18556 | 0.004269999 |
| chr11 | 75950001 | 76050000 | 1023 | 1055 | 7.60E+07 | -0.11681 | 0.048659184 |
| chr11 | 76200001 | 76300000 | 966  | 1001 | 76250000 | -0.12372 | 0.039553521 |
| chr11 | 76250001 | 76350000 | 976  | 1077 | 76300000 | -0.21444 | 0.001196667 |
| chr11 | 76300001 | 76400000 | 1048 | 1128 | 76350000 | -0.1785  | 0.005696605 |
| chr11 | 76350001 | 76450000 | 1087 | 1181 | 76400000 | -0.19203 | 0.003252843 |
| chr11 | 76400001 | 76500000 | 1023 | 1169 | 76450000 | -0.26484 | 9.10E-05    |

|       |          |          |      |      |          |          |             |
|-------|----------|----------|------|------|----------|----------|-------------|
| chr11 | 76450001 | 76550000 | 967  | 1022 | 76500000 | -0.15218 | 0.015438291 |
| chr11 | 76750001 | 76850000 | 1072 | 1162 | 76800000 | -0.18868 | 0.003748667 |
| chr11 | 76800001 | 76900000 | 1099 | 1305 | 76850000 | -0.32023 | 3.19E-06    |
| chr11 | 76850001 | 76950000 | 1065 | 1232 | 76900000 | -0.28252 | 3.31E-05    |
| chr11 | 77050001 | 77150000 | 1122 | 971  | 77100000 | 0.136158 | 0.026960887 |
| chr11 | 77200001 | 77300000 | 895  | 763  | 77250000 | 0.157833 | 0.012792075 |
| chr11 | 77250001 | 77350000 | 875  | 763  | 77300000 | 0.125228 | 0.038079817 |
| chr11 | 77300001 | 77400000 | 954  | 831  | 77350000 | 0.126769 | 0.036315375 |
| chr11 | 77750001 | 77850000 | 878  | 752  | 77800000 | 0.151117 | 0.016257068 |
| chr11 | 77800001 | 77900000 | 934  | 797  | 77850000 | 0.156471 | 0.013437634 |
| chr11 | 78050001 | 78150000 | 1075 | 916  | 78100000 | 0.158545 | 0.012465157 |
| chr11 | 78150001 | 78250000 | 951  | 828  | 78200000 | 0.127443 | 0.035565201 |
| chr11 | 78250001 | 78350000 | 876  | 905  | 78300000 | -0.11936 | 0.045120574 |
| chr11 | 78300001 | 78400000 | 879  | 943  | 78350000 | -0.17377 | 0.006877383 |
| chr11 | 78350001 | 78450000 | 1013 | 1058 | 78400000 | -0.13508 | 0.027636462 |
| chr11 | 78400001 | 78500000 | 1083 | 1137 | 78450000 | -0.14257 | 0.021548528 |
| chr11 | 78450001 | 78550000 | 1047 | 1118 | 78500000 | -0.16703 | 0.008929948 |
| chr11 | 78700001 | 78800000 | 1069 | 1124 | 78750000 | -0.14475 | 0.020006023 |
| chr11 | 78750001 | 78850000 | 993  | 1055 | 78800000 | -0.15975 | 0.011736278 |
| chr11 | 78800001 | 78900000 | 990  | 1021 | 78850000 | -0.11685 | 0.048594035 |
| chr11 | 79050001 | 79150000 | 1087 | 1213 | 79100000 | -0.2306  | 0.000550229 |
| chr11 | 79100001 | 79200000 | 1121 | 1184 | 79150000 | -0.15125 | 0.015952967 |
| chr11 | 79150001 | 79250000 | 1083 | 1126 | 79200000 | -0.12855 | 0.034057228 |
| chr11 | 79200001 | 79300000 | 983  | 1025 | 79250000 | -0.13273 | 0.029814207 |
| chr11 | 79250001 | 79350000 | 976  | 1023 | 79300000 | -0.14022 | 0.02331883  |
| chr11 | 79550001 | 79650000 | 963  | 1045 | 79600000 | -0.19027 | 0.003505554 |
| chr11 | 79600001 | 79700000 | 978  | 1053 | 79650000 | -0.17897 | 0.005589677 |
| chr11 | 80300001 | 80400000 | 724  | 772  | 80350000 | -0.16498 | 0.009652407 |
| chr11 | 80350001 | 80450000 | 735  | 768  | 80400000 | -0.13573 | 0.027051029 |
| chr11 | 80500001 | 80600000 | 898  | 938  | 80550000 | -0.13524 | 0.027486548 |
| chr11 | 80850001 | 80950000 | 970  | 1022 | 80900000 | -0.14771 | 0.0180647   |
| chr11 | 80900001 | 81000000 | 961  | 992  | 80950000 | -0.11818 | 0.046735798 |
| chr11 | 80950001 | 81050000 | 1034 | 879  | 8.10E+07 | 0.161929 | 0.011009786 |
| chr11 | 81000001 | 81100000 | 1067 | 864  | 81050000 | 0.232085 | 0.000535397 |
| chr11 | 81050001 | 81150000 | 1036 | 887  | 81100000 | 0.151646 | 0.015957139 |
| chr11 | 81350001 | 81450000 | 1077 | 938  | 81400000 | 0.126987 | 0.03607166  |
| chr11 | 81400001 | 81500000 | 1021 | 889  | 81450000 | 0.127356 | 0.035661377 |
| chr11 | 81450001 | 81550000 | 967  | 819  | 81500000 | 0.167281 | 0.009010507 |
| chr11 | 81500001 | 81600000 | 1006 | 855  | 81550000 | 0.162262 | 0.01087498  |
| chr11 | 81600001 | 81700000 | 1040 | 889  | 81650000 | 0.153956 | 0.014704098 |
| chr11 | 81650001 | 81750000 | 1001 | 860  | 81700000 | 0.146662 | 0.018976718 |
| chr11 | 81700001 | 81800000 | 1008 | 878  | 81750000 | 0.126831 | 0.036245802 |
| chr11 | 81950001 | 82050000 | 958  | 834  | 8.20E+07 | 0.127607 | 0.035384881 |
| chr11 | 82150001 | 82250000 | 917  | 948  | 82200000 | -0.12034 | 0.043819235 |
| chr11 | 82550001 | 82650000 | 955  | 993  | 82600000 | -0.12866 | 0.033929678 |
| chr11 | 82600001 | 82700000 | 862  | 894  | 82650000 | -0.12496 | 0.038076644 |
| chr11 | 82750001 | 82850000 | 984  | 853  | 82800000 | 0.133741 | 0.029151481 |

|       |          |          |      |      |          |          |             |
|-------|----------|----------|------|------|----------|----------|-------------|
| chr11 | 82800001 | 82900000 | 944  | 812  | 82850000 | 0.144935 | 0.020130424 |
| chr11 | 82850001 | 82950000 | 960  | 816  | 82900000 | 0.162093 | 0.01094313  |
| chr11 | 82900001 | 83000000 | 949  | 817  | 82950000 | 0.1437   | 0.020992059 |
| chr11 | 83100001 | 83200000 | 874  | 764  | 83150000 | 0.121689 | 0.042399269 |
| chr11 | 83250001 | 83350000 | 1022 | 896  | 83300000 | 0.117453 | 0.048083151 |
| chr11 | 83650001 | 83750000 | 1063 | 887  | 83700000 | 0.188764 | 0.003833218 |
| chr11 | 83700001 | 83800000 | 1011 | 854  | 83750000 | 0.171103 | 0.007784975 |
| chr11 | 83900001 | 84000000 | 995  | 872  | 83950000 | 0.117997 | 0.047320883 |
| chr11 | 84050001 | 84150000 | 1022 | 873  | 84100000 | 0.15497  | 0.014181802 |
| chr11 | 84100001 | 84200000 | 1052 | 910  | 84150000 | 0.136824 | 0.026381401 |
| chr11 | 84350001 | 84450000 | 1015 | 1054 | 84400000 | -0.12677 | 0.036004281 |
| chr11 | 85100001 | 85200000 | 923  | 998  | 85150000 | -0.18508 | 0.004355224 |
| chr11 | 85150001 | 85250000 | 944  | 1053 | 85200000 | -0.23002 | 0.00056627  |
| chr11 | 85250001 | 85350000 | 926  | 764  | 85300000 | 0.205068 | 0.001898973 |
| chr11 | 86000001 | 86100000 | 873  | 757  | 86050000 | 0.133317 | 0.029550891 |
| chr11 | 86050001 | 86150000 | 966  | 800  | 86100000 | 0.199651 | 0.002410429 |
| chr11 | 86250001 | 86350000 | 996  | 870  | 86300000 | 0.122759 | 0.041053739 |
| chr11 | 86950001 | 87050000 | 954  | 820  | 8.70E+07 | 0.145994 | 0.019416317 |
| chr11 | 87450001 | 87550000 | 905  | 776  | 87500000 | 0.149489 | 0.017208854 |
| chr11 | 87500001 | 87600000 | 1012 | 845  | 87550000 | 0.187814 | 0.003987569 |
| chr11 | 87550001 | 87650000 | 1072 | 922  | 87600000 | 0.145094 | 0.020021641 |
| chr11 | 87650001 | 87750000 | 485  | 409  | 87700000 | 0.173512 | 0.007090534 |
| chr11 | 88050001 | 88150000 | 1009 | 878  | 88100000 | 0.128262 | 0.034670828 |
| chr11 | 88150001 | 88250000 | 1030 | 903  | 88200000 | 0.117475 | 0.048052286 |
| chr11 | 88350001 | 88450000 | 1052 | 908  | 88400000 | 0.139999 | 0.023764061 |
| chr11 | 88550001 | 88650000 | 438  | 380  | 88600000 | 0.13256  | 0.03027485  |
| chr11 | 88750001 | 88850000 | 278  | 236  | 88800000 | 0.163926 | 0.010222463 |
| chr11 | 88800001 | 88900000 | 364  | 313  | 88850000 | 0.145404 | 0.019811452 |
| chr11 | 89450001 | 89550000 | 89   | 95   | 89500000 | -0.16649 | 0.009114522 |
| chr11 | 89500001 | 89600000 | 17   | 20   | 89550000 | -0.30684 | 7.53E-06    |
| chr11 | 89600001 | 89700000 | 26   | 17   | 89650000 | 0.540605 | 5.54E-14    |
| chr11 | 89650001 | 89750000 | 19   | 8    | 89700000 | 1.175556 | 7.83E-49    |
| chr11 | 89700001 | 89800000 | 9    | 7    | 89750000 | 0.290198 | 2.29E-05    |
| chr11 | 89850001 | 89950000 | 999  | 853  | 89900000 | 0.155567 | 0.013881546 |
| chr11 | 90000001 | 90100000 | 938  | 820  | 90050000 | 0.121592 | 0.042522557 |
| chr11 | 90150001 | 90250000 | 983  | 848  | 90200000 | 0.140755 | 0.02317357  |
| chr11 | 90200001 | 90300000 | 1052 | 836  | 90250000 | 0.259188 | 0.000132347 |
| chr11 | 90250001 | 90350000 | 1000 | 797  | 90300000 | 0.254977 | 0.000165827 |
| chr11 | 90300001 | 90400000 | 946  | 805  | 90350000 | 0.16048  | 0.011614054 |
| chr11 | 90350001 | 90450000 | 970  | 844  | 90400000 | 0.12837  | 0.034553798 |
| chr11 | 90650001 | 90750000 | 898  | 752  | 90700000 | 0.183611 | 0.004740018 |
| chr11 | 90700001 | 90800000 | 792  | 661  | 90750000 | 0.188478 | 0.00387904  |
| chr11 | 91000001 | 91100000 | 888  | 934  | 91050000 | -0.14523 | 0.019677656 |
| chr11 | 92850001 | 92950000 | 937  | 817  | 92900000 | 0.125341 | 0.037948065 |
| chr11 | 93400001 | 93500000 | 932  | 776  | 93450000 | 0.191902 | 0.003360654 |
| chr11 | 93450001 | 93550000 | 905  | 789  | 93500000 | 0.125521 | 0.037739537 |
| chr11 | 94350001 | 94450000 | 1045 | 911  | 94400000 | 0.125608 | 0.037638251 |

|       |          |          |      |      |           |          |             |
|-------|----------|----------|------|------|-----------|----------|-------------|
| chr11 | 94700001 | 94800000 | 955  | 1020 | 94750000  | -0.16737 | 0.008815451 |
| chr11 | 95600001 | 95700000 | 936  | 982  | 95650000  | -0.14159 | 0.022277106 |
| chr11 | 95750001 | 95850000 | 1124 | 927  | 95800000  | 0.205629 | 0.001852078 |
| chr11 | 95800001 | 95900000 | 1096 | 940  | 95850000  | 0.149143 | 0.017417296 |
| chr11 | 96350001 | 96450000 | 136  | 110  | 96400000  | 0.233731 | 0.000493616 |
| chr11 | 96500001 | 96600000 | 955  | 837  | 96550000  | 0.117901 | 0.047453727 |
| chr11 | 96850001 | 96950000 | 970  | 849  | 96900000  | 0.119848 | 0.044797921 |
| chr11 | 96900001 | 97000000 | 908  | 771  | 96950000  | 0.16359  | 0.010351612 |
| chr11 | 97500001 | 97600000 | 938  | 820  | 97550000  | 0.121592 | 0.042522557 |
| chr11 | 97550001 | 97650000 | 992  | 838  | 97600000  | 0.171018 | 0.007810584 |
| chr11 | 97700001 | 97800000 | 1012 | 872  | 97750000  | 0.142437 | 0.021905155 |
| chr11 | 97850001 | 97950000 | 993  | 847  | 97900000  | 0.15706  | 0.013155071 |
| chr11 | 97900001 | 98000000 | 950  | 811  | 97950000  | 0.155854 | 0.013739408 |
| chr11 | 98000001 | 98100000 | 941  | 782  | 98050000  | 0.194654 | 0.002990051 |
| chr11 | 98050001 | 98150000 | 927  | 795  | 98100000  | 0.149243 | 0.01735723  |
| chr11 | 98100001 | 98200000 | 925  | 785  | 98150000  | 0.164389 | 0.010047232 |
| chr11 | 98150001 | 98250000 | 878  | 767  | 98200000  | 0.122623 | 0.041222829 |
| chr11 | 98500001 | 98600000 | 973  | 853  | 98550000  | 0.117522 | 0.047985183 |
| chr11 | 98700001 | 98800000 | 1025 | 897  | 98750000  | 0.120072 | 0.044500477 |
| chr11 | 99050001 | 99150000 | 1009 | 869  | 99100000  | 0.143126 | 0.021402969 |
| chr11 | 99100001 | 99200000 | 1045 | 877  | 99150000  | 0.180482 | 0.00538008  |
| chr11 | 99150001 | 99250000 | 1030 | 882  | 99200000  | 0.151422 | 0.016083506 |
| chr11 | 99300001 | 99400000 | 1055 | 874  | 99350000  | 0.199166 | 0.002461882 |
| chr11 | 99500001 | 99600000 | 1035 | 849  | 99550000  | 0.213423 | 0.001301344 |
| chr11 | 99550001 | 99650000 | 1048 | 860  | 99600000  | 0.212858 | 0.001335492 |
| chr11 | 99600001 | 99700000 | 1022 | 847  | 99650000  | 0.19859  | 0.00252429  |
| chr11 | 99650001 | 99750000 | 1041 | 797  | 99700000  | 0.312947 | 5.70E-06    |
| chr11 | 99700001 | 99800000 | 1007 | 803  | 99750000  | 0.25422  | 0.000172627 |
| chr11 | 99900001 | 1E+08    | 998  | 845  | 99950000  | 0.167717 | 0.008862629 |
| chr11 | 99950001 | 1E+08    | 1073 | 934  | 1.00E+08  | 0.127784 | 0.035190375 |
| chr11 | 1.01E+08 | 1.01E+08 | 928  | 794  | 100550000 | 0.152614 | 0.015421445 |
| chr11 | 1.01E+08 | 1.01E+08 | 1008 | 880  | 101250000 | 0.123548 | 0.040082672 |
| chr11 | 1.01E+08 | 1.01E+08 | 1040 | 910  | 101300000 | 0.120273 | 0.044234652 |
| chr11 | 1.03E+08 | 1.03E+08 | 997  | 840  | 1.03E+08  | 0.174832 | 0.006733678 |
| chr11 | 1.03E+08 | 1.03E+08 | 1031 | 832  | 103050000 | 0.237017 | 0.000419126 |
| chr11 | 1.03E+08 | 1.03E+08 | 1075 | 859  | 103100000 | 0.251235 | 0.000202094 |
| chr11 | 1.03E+08 | 1.03E+08 | 1008 | 841  | 103150000 | 0.188946 | 0.0038042   |
| chr11 | 1.03E+08 | 1.03E+08 | 968  | 845  | 103300000 | 0.123684 | 0.03991799  |
| chr11 | 1.03E+08 | 1.03E+08 | 1018 | 848  | 103350000 | 0.19123  | 0.003457184 |
| chr11 | 1.03E+08 | 1.03E+08 | 960  | 823  | 103400000 | 0.14977  | 0.017041248 |
| chr11 | 1.04E+08 | 1.04E+08 | 1060 | 923  | 103900000 | 0.12729  | 0.035734265 |
| chr11 | 1.04E+08 | 1.04E+08 | 977  | 850  | 103950000 | 0.128524 | 0.034388156 |
| chr11 | 1.04E+08 | 1.04E+08 | 1010 | 853  | 104250000 | 0.171366 | 0.007706454 |
| chr11 | 1.04E+08 | 1.05E+08 | 1085 | 943  | 104450000 | 0.129994 | 0.032839853 |
| chr11 | 1.04E+08 | 1.05E+08 | 1098 | 934  | 104500000 | 0.161012 | 0.011388947 |
| chr11 | 1.05E+08 | 1.05E+08 | 1073 | 901  | 104650000 | 0.179679 | 0.005556358 |
| chr11 | 1.05E+08 | 1.05E+08 | 1088 | 906  | 105050000 | 0.191724 | 0.003385944 |

|       |          |          |      |      |           |          |             |
|-------|----------|----------|------|------|-----------|----------|-------------|
| chr11 | 1.05E+08 | 1.05E+08 | 1011 | 789  | 105200000 | 0.285314 | 3.05E-05    |
| chr11 | 1.05E+08 | 1.05E+08 | 1025 | 835  | 105250000 | 0.223404 | 0.000815408 |
| chr11 | 1.06E+08 | 1.06E+08 | 1020 | 883  | 105600000 | 0.135712 | 0.027354123 |
| chr11 | 1.06E+08 | 1.06E+08 | 1074 | 925  | 105650000 | 0.143097 | 0.021424179 |
| chr11 | 1.06E+08 | 1.06E+08 | 1041 | 888  | 105800000 | 0.156967 | 0.013199471 |
| chr11 | 1.06E+08 | 1.06E+08 | 1034 | 890  | 105850000 | 0.143987 | 0.020789145 |
| chr11 | 1.06E+08 | 1.06E+08 | 1007 | 859  | 106050000 | 0.156962 | 0.013201779 |
| chr11 | 1.06E+08 | 1.06E+08 | 1072 | 933  | 106300000 | 0.127984 | 0.034971759 |
| chr11 | 1.06E+08 | 1.06E+08 | 1101 | 909  | 106350000 | 0.20409  | 0.001983224 |
| chr11 | 1.06E+08 | 1.06E+08 | 1111 | 901  | 106400000 | 0.229888 | 0.000596286 |
| chr11 | 1.06E+08 | 1.07E+08 | 1072 | 931  | 106450000 | 0.131108 | 0.031732697 |
| chr11 | 1.07E+08 | 1.07E+08 | 1020 | 867  | 106550000 | 0.162093 | 0.01094313  |
| chr11 | 1.07E+08 | 1.07E+08 | 962  | 807  | 106600000 | 0.181096 | 0.005248691 |
| chr11 | 1.07E+08 | 1.07E+08 | 1051 | 919  | 106950000 | 0.121254 | 0.042956243 |
| chr11 | 1.07E+08 | 1.07E+08 | 1055 | 892  | 107100000 | 0.169756 | 0.008199119 |
| chr11 | 1.07E+08 | 1.07E+08 | 940  | 807  | 107300000 | 0.14772  | 0.018297482 |
| chr11 | 1.07E+08 | 1.08E+08 | 1006 | 850  | 107500000 | 0.170724 | 0.007899678 |
| chr11 | 1.08E+08 | 1.08E+08 | 820  | 716  | 107800000 | 0.123293 | 0.040395189 |
| chr11 | 1.08E+08 | 1.08E+08 | 848  | 683  | 108150000 | 0.239807 | 0.000364238 |
| chr11 | 1.08E+08 | 1.08E+08 | 888  | 712  | 108200000 | 0.246311 | 0.000261212 |
| chr11 | 1.08E+08 | 1.08E+08 | 819  | 691  | 108250000 | 0.172806 | 0.007288194 |
| chr11 | 1.08E+08 | 1.08E+08 | 896  | 763  | 108350000 | 0.159444 | 0.012063275 |
| chr11 | 1.08E+08 | 1.09E+08 | 1010 | 876  | 108500000 | 0.132981 | 0.02987031  |
| chr11 | 1.09E+08 | 1.09E+08 | 1054 | 899  | 108750000 | 0.15711  | 0.013131274 |
| chr11 | 1.09E+08 | 1.09E+08 | 1035 | 906  | 108800000 | 0.119676 | 0.045028093 |
| chr11 | 1.09E+08 | 1.09E+08 | 1092 | 954  | 109250000 | 0.12254  | 0.041325914 |
| chr11 | 1.09E+08 | 1.09E+08 | 957  | 818  | 109350000 | 0.154046 | 0.014657116 |
| chr11 | 1.09E+08 | 1.09E+08 | 903  | 785  | 109400000 | 0.129662 | 0.033184517 |
| chr11 | 1.09E+08 | 1.1E+08  | 1101 | 956  | 109500000 | 0.13136  | 0.031452324 |
| chr11 | 1.1E+08  | 1.1E+08  | 938  | 822  | 110050000 | 0.118078 | 0.047207992 |
| chr11 | 1.1E+08  | 1.1E+08  | 892  | 766  | 110100000 | 0.147328 | 0.018547012 |
| chr11 | 1.11E+08 | 1.11E+08 | 1104 | 932  | 110950000 | 0.171967 | 0.007529486 |
| chr11 | 1.12E+08 | 1.12E+08 | 879  | 982  | 111800000 | -0.23223 | 0.000507388 |
| chr11 | 1.12E+08 | 1.12E+08 | 898  | 933  | 111850000 | -0.12753 | 0.03515419  |
| chr11 | 1.12E+08 | 1.12E+08 | 984  | 1036 | 112250000 | -0.14667 | 0.018731061 |
| chr11 | 1.12E+08 | 1.12E+08 | 959  | 1012 | 112300000 | -0.14998 | 0.016687558 |
| chr11 | 1.13E+08 | 1.13E+08 | 1100 | 952  | 112850000 | 0.136098 | 0.02701305  |
| chr11 | 1.13E+08 | 1.13E+08 | 1017 | 1079 | 113200000 | -0.15775 | 0.012631371 |
| chr11 | 1.13E+08 | 1.13E+08 | 1082 | 1153 | 113250000 | -0.16406 | 0.009993026 |
| chr11 | 1.13E+08 | 1.13E+08 | 1111 | 1165 | 113350000 | -0.14084 | 0.022840925 |
| chr11 | 1.14E+08 | 1.14E+08 | 1012 | 1072 | 113950000 | -0.15547 | 0.013722027 |
| chr11 | 1.14E+08 | 1.14E+08 | 1083 | 1141 | 1.14E+08  | -0.14764 | 0.01811059  |
| chr11 | 1.15E+08 | 1.15E+08 | 1087 | 927  | 114600000 | 0.157339 | 0.01302304  |
| chr11 | 1.15E+08 | 1.15E+08 | 1088 | 1132 | 114900000 | -0.12957 | 0.03297835  |
| chr11 | 1.15E+08 | 1.15E+08 | 1081 | 1128 | 114950000 | -0.13377 | 0.028831366 |
| chr11 | 1.15E+08 | 1.15E+08 | 1087 | 1187 | 1.15E+08  | -0.19934 | 0.002370565 |
| chr11 | 1.15E+08 | 1.15E+08 | 1080 | 1146 | 115050000 | -0.15795 | 0.012539122 |

|       |          |          |      |      |           |          |             |
|-------|----------|----------|------|------|-----------|----------|-------------|
| chr11 | 1.15E+08 | 1.15E+08 | 1038 | 1083 | 115400000 | -0.1336  | 0.028993666 |
| chr11 | 1.16E+08 | 1.16E+08 | 1103 | 1163 | 1.16E+08  | -0.14879 | 0.017397407 |
| chr11 | 1.16E+08 | 1.16E+08 | 1090 | 1177 | 116050000 | -0.18316 | 0.004714442 |
| chr11 | 1.16E+08 | 1.16E+08 | 1082 | 1141 | 116100000 | -0.14897 | 0.017288252 |
| chr11 | 1.16E+08 | 1.16E+08 | 1052 | 1092 | 116150000 | -0.12621 | 0.036632543 |
| chr11 | 1.16E+08 | 1.16E+08 | 1034 | 1082 | 116200000 | -0.13784 | 0.025246001 |
| chr11 | 1.16E+08 | 1.16E+08 | 1006 | 1121 | 116350000 | -0.22853 | 0.000609434 |
| chr11 | 1.16E+08 | 1.16E+08 | 998  | 1073 | 116400000 | -0.17691 | 0.006071374 |
| chr11 | 1.16E+08 | 1.17E+08 | 1002 | 1037 | 116450000 | -0.12191 | 0.041797055 |
| chr11 | 1.16E+08 | 1.17E+08 | 999  | 1050 | 116500000 | -0.1442  | 0.020384063 |
| chr11 | 1.17E+08 | 1.17E+08 | 1015 | 1092 | 116550000 | -0.17786 | 0.005843787 |
| chr11 | 1.17E+08 | 1.17E+08 | 1027 | 1102 | 116600000 | -0.17406 | 0.006798333 |
| chr11 | 1.17E+08 | 1.17E+08 | 995  | 1050 | 116650000 | -0.14999 | 0.016679153 |
| chr11 | 1.17E+08 | 1.17E+08 | 910  | 956  | 117200000 | -0.14352 | 0.020868238 |
| chr11 | 1.17E+08 | 1.17E+08 | 931  | 991  | 117250000 | -0.16248 | 0.01060639  |
| chr11 | 1.17E+08 | 1.17E+08 | 1033 | 1117 | 117300000 | -0.18516 | 0.004340868 |
| chr11 | 1.17E+08 | 1.17E+08 | 1120 | 1224 | 117350000 | -0.20048 | 0.002254823 |
| chr11 | 1.17E+08 | 1.17E+08 | 1078 | 1132 | 117400000 | -0.14289 | 0.021317719 |
| chr11 | 1.18E+08 | 1.18E+08 | 1071 | 1119 | 117700000 | -0.13562 | 0.027148823 |
| chr11 | 1.18E+08 | 1.18E+08 | 1062 | 1110 | 117950000 | -0.13615 | 0.026687396 |
| chr11 | 1.18E+08 | 1.19E+08 | 910  | 966  | 118450000 | -0.15853 | 0.012275202 |
| chr11 | 1.18E+08 | 1.19E+08 | 1021 | 1097 | 118500000 | -0.17595 | 0.006307534 |
| chr11 | 1.19E+08 | 1.19E+08 | 725  | 633  | 118600000 | 0.123404 | 0.040259169 |
| chr11 | 1.19E+08 | 1.19E+08 | 842  | 705  | 118650000 | 0.183825 | 0.004698799 |
| chr11 | 1.19E+08 | 1.19E+08 | 936  | 970  | 118750000 | -0.12385 | 0.039397337 |
| chr11 | 1.19E+08 | 1.19E+08 | 962  | 1041 | 118800000 | -0.18623 | 0.004151946 |
| chr11 | 1.19E+08 | 1.19E+08 | 835  | 864  | 118850000 | -0.12163 | 0.042150282 |
| chr11 | 1.19E+08 | 1.19E+08 | 1008 | 1048 | 119400000 | -0.12851 | 0.03408988  |
| chr11 | 1.19E+08 | 1.2E+08  | 964  | 1019 | 119450000 | -0.15242 | 0.015306184 |
| chr11 | 1.19E+08 | 1.2E+08  | 1036 | 1115 | 119500000 | -0.17839 | 0.005721542 |
| chr11 | 1.2E+08  | 1.2E+08  | 1110 | 1171 | 119550000 | -0.14955 | 0.01693864  |
| chr11 | 1.2E+08  | 1.2E+08  | 1119 | 1213 | 119600000 | -0.18874 | 0.003738541 |
| chr11 | 1.2E+08  | 1.2E+08  | 1157 | 1212 | 119650000 | -0.13937 | 0.023991653 |
| chr11 | 1.2E+08  | 1.2E+08  | 1149 | 1216 | 119750000 | -0.15414 | 0.014395869 |
| chr11 | 1.2E+08  | 1.2E+08  | 1103 | 1146 | 119800000 | -0.12755 | 0.035140336 |
| chr11 | 1.2E+08  | 1.2E+08  | 1044 | 1152 | 1.20E+08  | -0.21439 | 0.001199247 |
| chr11 | 1.2E+08  | 1.2E+08  | 1026 | 1167 | 120050000 | -0.25815 | 0.000131464 |
| chr11 | 1.2E+08  | 1.2E+08  | 1090 | 1128 | 120100000 | -0.12181 | 0.04191668  |
| chr11 | 1.2E+08  | 1.21E+08 | 1041 | 1112 | 120450000 | -0.16756 | 0.008751544 |
| chr11 | 1.2E+08  | 1.21E+08 | 1044 | 1094 | 120500000 | -0.13986 | 0.023602696 |
| chr11 | 1.21E+08 | 1.21E+08 | 1013 | 1076 | 1.21E+08  | -0.15942 | 0.011881415 |
| chr11 | 1.21E+08 | 1.21E+08 | 981  | 1016 | 121300000 | -0.12295 | 0.040495697 |
| chr11 | 1.22E+08 | 1.22E+08 | 932  | 796  | 121700000 | 0.15519  | 0.01407062  |
| chr11 | 1.22E+08 | 1.22E+08 | 1016 | 876  | 121850000 | 0.141526 | 0.022585077 |
| chr11 | 1.22E+08 | 1.22E+08 | 1032 | 869  | 121900000 | 0.175643 | 0.006522528 |
| chr11 | 1.22E+08 | 1.22E+08 | 1065 | 907  | 122150000 | 0.159307 | 0.012123681 |
| chr11 | 1.22E+08 | 1.22E+08 | 949  | 997  | 122350000 | -0.14356 | 0.020838898 |

|       |          |          |      |      |           |          |             |
|-------|----------|----------|------|------|-----------|----------|-------------|
| chr11 | 1.22E+08 | 1.22E+08 | 835  | 894  | 122400000 | -0.17087 | 0.007702248 |
| chr11 | 1.23E+08 | 1.23E+08 | 944  | 809  | 122750000 | 0.150275 | 0.016743272 |
| chr11 | 1.23E+08 | 1.24E+08 | 1040 | 1095 | 123450000 | -0.14672 | 0.018696398 |
| chr11 | 1.23E+08 | 1.24E+08 | 982  | 1157 | 123500000 | -0.30897 | 6.59E-06    |
| chr11 | 1.24E+08 | 1.24E+08 | 993  | 1064 | 123550000 | -0.172   | 0.007369414 |
| chr11 | 1.24E+08 | 1.24E+08 | 996  | 873  | 124200000 | 0.117792 | 0.047606098 |
| chr11 | 1.24E+08 | 1.24E+08 | 927  | 811  | 124250000 | 0.120496 | 0.04394218  |
| chr11 | 1.25E+08 | 1.25E+08 | 995  | 1084 | 124650000 | -0.19597 | 0.002746237 |
| chr11 | 1.25E+08 | 1.25E+08 | 995  | 1172 | 124700000 | -0.30858 | 6.75E-06    |
| chr11 | 1.25E+08 | 1.25E+08 | 1001 | 1076 | 124750000 | -0.17661 | 0.006145044 |
| chr11 | 1.25E+08 | 1.25E+08 | 881  | 919  | 124800000 | -0.13329 | 0.029279428 |
| chr11 | 1.25E+08 | 1.25E+08 | 911  | 960  | 124850000 | -0.14796 | 0.017911521 |
| chr11 | 1.25E+08 | 1.25E+08 | 965  | 1013 | 124900000 | -0.14241 | 0.021669709 |
| chr11 | 1.25E+08 | 1.25E+08 | 1055 | 1099 | 1.25E+08  | -0.13132 | 0.031193303 |
| chr11 | 1.25E+08 | 1.25E+08 | 1072 | 1168 | 125050000 | -0.19611 | 0.002729738 |
| chr11 | 1.25E+08 | 1.25E+08 | 1131 | 1173 | 125100000 | -0.12498 | 0.038056573 |
| chr11 | 1.25E+08 | 1.25E+08 | 1133 | 1169 | 125150000 | -0.1175  | 0.047680145 |
| chr11 | 1.25E+08 | 1.25E+08 | 1103 | 1189 | 125200000 | -0.18069 | 0.005214662 |
| chr11 | 1.25E+08 | 1.25E+08 | 1067 | 1161 | 125250000 | -0.19418 | 0.002966669 |
| chr11 | 1.25E+08 | 1.26E+08 | 1027 | 877  | 125500000 | 0.155416 | 0.013957179 |
| chr11 | 1.26E+08 | 1.26E+08 | 983  | 834  | 125550000 | 0.164772 | 0.009904056 |
| chr11 | 1.26E+08 | 1.26E+08 | 917  | 970  | 126150000 | -0.15343 | 0.014762278 |
| chr11 | 1.26E+08 | 1.26E+08 | 910  | 993  | 126200000 | -0.1983  | 0.002481232 |
| chr11 | 1.26E+08 | 1.26E+08 | 936  | 1028 | 126250000 | -0.20763 | 0.001636768 |
| chr11 | 1.26E+08 | 1.26E+08 | 995  | 1137 | 126300000 | -0.26484 | 9.10E-05    |
| chr11 | 1.27E+08 | 1.27E+08 | 1053 | 1113 | 126900000 | -0.15232 | 0.015361207 |
| chr11 | 1.27E+08 | 1.27E+08 | 1029 | 1070 | 1.27E+08  | -0.12874 | 0.033849942 |
| chr11 | 1.27E+08 | 1.27E+08 | 1025 | 1097 | 127050000 | -0.17031 | 0.007871167 |
| chr11 | 1.27E+08 | 1.27E+08 | 1053 | 1111 | 127100000 | -0.14973 | 0.01683669  |
| chr11 | 1.27E+08 | 1.27E+08 | 988  | 1040 | 127150000 | -0.14637 | 0.018921795 |
| chr11 | 1.27E+08 | 1.27E+08 | 930  | 967  | 127400000 | -0.12866 | 0.03393801  |
| chr11 | 1.28E+08 | 1.28E+08 | 1099 | 956  | 128300000 | 0.128737 | 0.034159942 |
| chr11 | 1.29E+08 | 1.29E+08 | 1105 | 1168 | 128600000 | -0.15237 | 0.015336224 |
| chr11 | 1.29E+08 | 1.29E+08 | 1087 | 1157 | 128650000 | -0.16241 | 0.01063296  |
| chr11 | 1.29E+08 | 1.29E+08 | 1071 | 1133 | 128750000 | -0.15356 | 0.014695678 |
| chr11 | 1.29E+08 | 1.29E+08 | 1063 | 1135 | 128800000 | -0.16692 | 0.008966848 |
| chr11 | 1.29E+08 | 1.3E+08  | 1014 | 1055 | 129450000 | -0.12956 | 0.032988828 |
| chr11 | 1.3E+08  | 1.3E+08  | 1020 | 1075 | 130050000 | -0.14814 | 0.017797026 |
| chr11 | 1.3E+08  | 1.3E+08  | 928  | 997  | 130250000 | -0.17584 | 0.006335668 |
| chr11 | 1.3E+08  | 1.3E+08  | 1009 | 1162 | 130300000 | -0.27606 | 4.82E-05    |
| chr11 | 1.3E+08  | 1.3E+08  | 974  | 1061 | 130350000 | -0.1958  | 0.002765976 |
| chr11 | 1.31E+08 | 1.31E+08 | 1012 | 1113 | 131350000 | -0.20962 | 0.001495189 |
| chr11 | 1.31E+08 | 1.31E+08 | 1054 | 1186 | 131400000 | -0.2426  | 0.000299832 |
| chr11 | 1.31E+08 | 1.32E+08 | 1058 | 1147 | 131450000 | -0.1889  | 0.003714056 |
| chr11 | 1.31E+08 | 1.32E+08 | 1038 | 1102 | 131500000 | -0.15869 | 0.012202854 |
| chr11 | 1.33E+08 | 1.33E+08 | 1050 | 1115 | 132900000 | -0.15903 | 0.01205292  |
| chr11 | 1.33E+08 | 1.33E+08 | 1026 | 1138 | 132950000 | -0.22184 | 0.00084314  |

|       |          |          |      |      |           |          |             |
|-------|----------|----------|------|------|-----------|----------|-------------|
| chr11 | 1.33E+08 | 1.33E+08 | 1085 | 1178 | 133100000 | -0.19102 | 0.003395995 |
| chr11 | 1.33E+08 | 1.33E+08 | 1053 | 1086 | 133200000 | -0.11689 | 0.048542302 |
| chr11 | 1.34E+08 | 1.34E+08 | 952  | 1102 | 133750000 | -0.28346 | 3.13E-05    |
| chr11 | 1.34E+08 | 1.34E+08 | 1057 | 1271 | 133800000 | -0.33836 | 9.49E-07    |
| chr11 | 1.34E+08 | 1.34E+08 | 1078 | 1162 | 133850000 | -0.18062 | 0.005228023 |
| chr11 | 1.34E+08 | 1.34E+08 | 1006 | 1070 | 134050000 | -0.16135 | 0.011059886 |
| chr11 | 1.34E+08 | 1.34E+08 | 976  | 1049 | 134100000 | -0.17643 | 0.006187932 |
| chr11 | 1.34E+08 | 1.34E+08 | 1026 | 1078 | 134200000 | -0.1437  | 0.020739078 |
| chr11 | 1.34E+08 | 1.34E+08 | 1064 | 1216 | 134250000 | -0.26502 | 9.01E-05    |
| chr11 | 1.34E+08 | 1.34E+08 | 1077 | 1133 | 134300000 | -0.1455  | 0.019498175 |
| chr11 | 1.34E+08 | 1.34E+08 | 1033 | 1082 | 134350000 | -0.13923 | 0.0241042   |
| chr11 | 1.34E+08 | 1.34E+08 | 1025 | 1080 | 134400000 | -0.14778 | 0.018021501 |
| chr11 | 1.34E+08 | 1.35E+08 | 1020 | 1063 | 134450000 | -0.13194 | 0.030577487 |
| chr11 | 1.34E+08 | 1.35E+08 | 1045 | 1148 | 134500000 | -0.20799 | 0.001610218 |
| chr11 | 1.35E+08 | 1.35E+08 | 1058 | 1114 | 134550000 | -0.14678 | 0.018656169 |
| chr11 | 1.35E+08 | 1.35E+08 | 1057 | 1102 | 134600000 | -0.13252 | 0.030017695 |
| chr11 | 1.35E+08 | 1.35E+08 | 1042 | 1097 | 134650000 | -0.14658 | 0.018786533 |
| chr11 | 1.35E+08 | 1.35E+08 | 1006 | 1083 | 134750000 | -0.17877 | 0.005634011 |
| chr11 | 1.35E+08 | 1.35E+08 | 735  | 833  | 134800000 | -0.25294 | 0.000174062 |
| chr6  | 350001   | 450000   | 1393 | 1470 | 4.00E+05  | -0.14999 | 0.016679153 |
| chr6  | 400001   | 500000   | 995  | 1043 | 450000    | -0.14034 | 0.023227224 |
| chr6  | 550001   | 650000   | 1070 | 912  | 6.00E+05  | 0.158133 | 0.012653332 |
| chr6  | 650001   | 750000   | 943  | 994  | 7.00E+05  | -0.14836 | 0.017660714 |
| chr6  | 850001   | 950000   | 948  | 994  | 9.00E+05  | -0.14073 | 0.022927176 |
| chr6  | 900001   | 1000000  | 941  | 977  | 950000    | -0.12654 | 0.036264097 |
| chr6  | 1000001  | 1100000  | 1054 | 1089 | 1050000   | -0.1195  | 0.044929573 |
| chr6  | 1300001  | 1400000  | 990  | 1042 | 1350000   | -0.14623 | 0.019017213 |
| chr6  | 1350001  | 1450000  | 962  | 1046 | 1400000   | -0.19315 | 0.003101248 |
| chr6  | 1550001  | 1650000  | 1112 | 1206 | 1600000   | -0.18944 | 0.003629419 |
| chr6  | 1600001  | 1700000  | 1058 | 1152 | 1650000   | -0.19517 | 0.002842351 |
| chr6  | 2350001  | 2450000  | 965  | 1000 | 2400000   | -0.12377 | 0.039490338 |
| chr6  | 3200001  | 3300000  | 1011 | 1096 | 3250000   | -0.18884 | 0.003723592 |
| chr6  | 3250001  | 3350000  | 1024 | 1129 | 3300000   | -0.2132  | 0.001267453 |
| chr6  | 3550001  | 3650000  | 1024 | 1100 | 3600000   | -0.17566 | 0.006381359 |
| chr6  | 3650001  | 3750000  | 1041 | 1077 | 3700000   | -0.12142 | 0.042414522 |
| chr6  | 3800001  | 3900000  | 1001 | 1057 | 3850000   | -0.15091 | 0.016151263 |
| chr6  | 3850001  | 3950000  | 980  | 1023 | 3900000   | -0.13432 | 0.028320796 |
| chr6  | 3950001  | 4050000  | 1021 | 879  | 4.00E+06  | 0.143676 | 0.021009258 |
| chr6  | 4600001  | 4700000  | 1105 | 957  | 4650000   | 0.135084 | 0.027916625 |
| chr6  | 4950001  | 5050000  | 864  | 894  | 5.00E+06  | -0.12162 | 0.042165053 |
| chr6  | 5100001  | 5200000  | 1032 | 1093 | 5150000   | -0.15522 | 0.01384405  |
| chr6  | 5150001  | 5250000  | 1026 | 1058 | 5200000   | -0.11668 | 0.048842444 |
| chr6  | 5750001  | 5850000  | 823  | 876  | 5800000   | -0.16241 | 0.010632359 |
| chr6  | 5800001  | 5900000  | 733  | 764  | 5850000   | -0.13213 | 0.030394938 |
| chr6  | 5950001  | 6050000  | 983  | 1024 | 6.00E+06  | -0.13132 | 0.031189317 |
| chr6  | 6100001  | 6200000  | 921  | 962  | 6150000   | -0.13521 | 0.027519466 |
| chr6  | 6150001  | 6250000  | 918  | 956  | 6200000   | -0.13089 | 0.031625515 |



|      |          |          |      |      |          |          |             |
|------|----------|----------|------|------|----------|----------|-------------|
| chr6 | 7300001  | 7400000  | 972  | 820  | 7350000  | 0.172961 | 0.007244491 |
| chr6 | 7350001  | 7450000  | 942  | 797  | 7400000  | 0.168776 | 0.008512378 |
| chr6 | 7650001  | 7750000  | 1033 | 1080 | 7700000  | -0.13656 | 0.026326744 |
| chr6 | 7850001  | 7950000  | 962  | 996  | 7900000  | -0.12248 | 0.041074206 |
| chr6 | 7900001  | 8000000  | 876  | 906  | 7950000  | -0.12095 | 0.043017082 |
| chr6 | 8200001  | 8300000  | 1031 | 881  | 8250000  | 0.154459 | 0.014443236 |
| chr6 | 8600001  | 8700000  | 1014 | 865  | 8650000  | 0.156914 | 0.013224701 |
| chr6 | 8750001  | 8850000  | 974  | 850  | 8800000  | 0.124087 | 0.039431173 |
| chr6 | 8900001  | 9000000  | 999  | 863  | 8950000  | 0.138752 | 0.024764407 |
| chr6 | 8950001  | 9050000  | 986  | 852  | 9.00E+06 | 0.138362 | 0.025084531 |
| chr6 | 9200001  | 9300000  | 996  | 833  | 9250000  | 0.185457 | 0.004395076 |
| chr6 | 9250001  | 9350000  | 1025 | 856  | 9300000  | 0.187569 | 0.004028262 |
| chr6 | 9700001  | 9800000  | 1055 | 904  | 9750000  | 0.150477 | 0.016625868 |
| chr6 | 9750001  | 9850000  | 1039 | 881  | 9800000  | 0.16561  | 0.009597374 |
| chr6 | 9900001  | 10000000 | 892  | 935  | 9950000  | -0.14029 | 0.023264622 |
| chr6 | 10100001 | 10200000 | 1044 | 916  | 10150000 | 0.11633  | 0.049687482 |
| chr6 | 10350001 | 10450000 | 981  | 1083 | 10400000 | -0.21508 | 0.001161278 |
| chr6 | 10400001 | 10500000 | 982  | 1056 | 10450000 | -0.17719 | 0.006004657 |
| chr6 | 10450001 | 10550000 | 883  | 917  | 10500000 | -0.12688 | 0.035877732 |
| chr6 | 10800001 | 10900000 | 823  | 896  | 10850000 | -0.19498 | 0.002866352 |
| chr6 | 10850001 | 10950000 | 858  | 888  | 10900000 | -0.12195 | 0.041735557 |
| chr6 | 11000001 | 11100000 | 883  | 912  | 11050000 | -0.11899 | 0.045616045 |
| chr6 | 11050001 | 11150000 | 841  | 921  | 11100000 | -0.20347 | 0.001974451 |
| chr6 | 11100001 | 11200000 | 960  | 990  | 11150000 | -0.11677 | 0.048720327 |
| chr6 | 11450001 | 11550000 | 965  | 845  | 11500000 | 0.119206 | 0.045660803 |
| chr6 | 11850001 | 11950000 | 993  | 863  | 11900000 | 0.130061 | 0.032769848 |
| chr6 | 11900001 | 12000000 | 1024 | 878  | 11950000 | 0.149551 | 0.017171892 |
| chr6 | 12350001 | 12450000 | 1131 | 935  | 12400000 | 0.202189 | 0.00215699  |
| chr6 | 12400001 | 12500000 | 1102 | 889  | 12450000 | 0.237497 | 0.000409165 |
| chr6 | 13200001 | 13300000 | 991  | 1023 | 13250000 | -0.11822 | 0.046672848 |
| chr6 | 13250001 | 13350000 | 942  | 1019 | 13300000 | -0.18573 | 0.004240185 |
| chr6 | 13300001 | 13400000 | 906  | 1004 | 13350000 | -0.22055 | 0.000896958 |
| chr6 | 14050001 | 14150000 | 1062 | 920  | 14100000 | 0.134706 | 0.028259272 |
| chr6 | 14200001 | 14300000 | 1126 | 978  | 14250000 | 0.130929 | 0.031885075 |
| chr6 | 14500001 | 14600000 | 983  | 1039 | 14550000 | -0.1523  | 0.015369856 |
| chr6 | 14550001 | 14650000 | 1008 | 1060 | 14600000 | -0.14494 | 0.019877277 |
| chr6 | 14850001 | 14950000 | 1015 | 885  | 14900000 | 0.125359 | 0.037927816 |
| chr6 | 15000001 | 15100000 | 926  | 799  | 15050000 | 0.140445 | 0.023414338 |
| chr6 | 15050001 | 15150000 | 918  | 792  | 15100000 | 0.140622 | 0.023276788 |
| chr6 | 16300001 | 16400000 | 958  | 999  | 16350000 | -0.13283 | 0.029720001 |
| chr6 | 16350001 | 16450000 | 985  | 1020 | 16400000 | -0.12275 | 0.040745172 |
| chr6 | 16600001 | 16700000 | 982  | 815  | 16650000 | 0.196551 | 0.002756625 |
| chr6 | 16850001 | 16950000 | 879  | 957  | 16900000 | -0.19503 | 0.002860241 |
| chr6 | 16900001 | 17000000 | 992  | 1023 | 16950000 | -0.11677 | 0.048720327 |
| chr6 | 17000001 | 17100000 | 961  | 837  | 17050000 | 0.126937 | 0.036127101 |
| chr6 | 17050001 | 17150000 | 896  | 763  | 17100000 | 0.159444 | 0.012063275 |
| chr6 | 17100001 | 17200000 | 975  | 841  | 17150000 | 0.140925 | 0.023043185 |

|      |          |          |      |      |          |          |             |
|------|----------|----------|------|------|----------|----------|-------------|
| chr6 | 17150001 | 17250000 | 981  | 853  | 17200000 | 0.129336 | 0.033525759 |
| chr6 | 17500001 | 17600000 | 916  | 802  | 17550000 | 0.119374 | 0.045434248 |
| chr6 | 17800001 | 17900000 | 933  | 796  | 17850000 | 0.156737 | 0.013309448 |
| chr6 | 17850001 | 17950000 | 991  | 838  | 17900000 | 0.169563 | 0.008259856 |
| chr6 | 18200001 | 18300000 | 951  | 827  | 18250000 | 0.129186 | 0.033683122 |
| chr6 | 18700001 | 18800000 | 997  | 872  | 18750000 | 0.120894 | 0.043422635 |
| chr6 | 18850001 | 18950000 | 948  | 828  | 18900000 | 0.122885 | 0.040897625 |
| chr6 | 19200001 | 19300000 | 844  | 716  | 19250000 | 0.164912 | 0.009852441 |
| chr6 | 19250001 | 19350000 | 970  | 848  | 19300000 | 0.121549 | 0.042578193 |
| chr6 | 19300001 | 19400000 | 1027 | 892  | 19350000 | 0.130949 | 0.031864797 |
| chr6 | 20000001 | 20100000 | 969  | 1013 | 20050000 | -0.13644 | 0.026435297 |
| chr6 | 20050001 | 20150000 | 969  | 1002 | 20100000 | -0.12069 | 0.043362956 |
| chr6 | 20350001 | 20450000 | 1047 | 878  | 20400000 | 0.181597 | 0.005143748 |
| chr6 | 20400001 | 20500000 | 970  | 820  | 20450000 | 0.169989 | 0.008126014 |
| chr6 | 21350001 | 21450000 | 983  | 818  | 21400000 | 0.192719 | 0.003246521 |
| chr6 | 21650001 | 21750000 | 867  | 758  | 21700000 | 0.121462 | 0.042688714 |
| chr6 | 22000001 | 22100000 | 1079 | 918  | 22050000 | 0.160757 | 0.011496239 |
| chr6 | 22150001 | 22250000 | 857  | 894  | 22200000 | -0.13335 | 0.029225865 |
| chr6 | 22450001 | 22550000 | 996  | 863  | 22500000 | 0.134413 | 0.02852744  |
| chr6 | 22700001 | 22800000 | 1068 | 903  | 22750000 | 0.169742 | 0.008203404 |
| chr6 | 22750001 | 22850000 | 1053 | 883  | 22800000 | 0.181648 | 0.005133054 |
| chr6 | 23950001 | 24050000 | 1007 | 857  | 2.40E+07 | 0.160325 | 0.011680266 |
| chr6 | 24650001 | 24750000 | 918  | 805  | 24700000 | 0.117134 | 0.048535119 |
| chr6 | 24700001 | 24800000 | 986  | 852  | 24750000 | 0.138362 | 0.025084531 |
| chr6 | 26000001 | 26100000 | 1004 | 880  | 26050000 | 0.117812 | 0.047578463 |
| chr6 | 26050001 | 26150000 | 966  | 823  | 26100000 | 0.158759 | 0.012368579 |
| chr6 | 26700001 | 26800000 | 117  | 129  | 26750000 | -0.21323 | 0.001265528 |
| chr6 | 26850001 | 26950000 | 92   | 74   | 26900000 | 0.241737 | 0.000330272 |
| chr6 | 27650001 | 27750000 | 911  | 787  | 27700000 | 0.138716 | 0.024794392 |
| chr6 | 27850001 | 27950000 | 1004 | 830  | 27900000 | 0.202204 | 0.002155531 |
| chr6 | 27900001 | 28000000 | 986  | 846  | 27950000 | 0.148558 | 0.017774733 |
| chr6 | 28300001 | 28400000 | 945  | 978  | 28350000 | -0.12189 | 0.041813819 |
| chr6 | 28600001 | 28700000 | 929  | 808  | 28650000 | 0.128952 | 0.0339316   |
| chr6 | 28700001 | 28800000 | 804  | 832  | 28750000 | -0.12176 | 0.041981267 |
| chr6 | 29500001 | 29600000 | 1026 | 1119 | 29550000 | -0.19755 | 0.00256362  |
| chr6 | 30550001 | 30650000 | 858  | 886  | 30600000 | -0.1187  | 0.046012981 |
| chr6 | 30600001 | 30700000 | 867  | 940  | 30650000 | -0.189   | 0.003697995 |
| chr6 | 30650001 | 30750000 | 884  | 988  | 30700000 | -0.23284 | 0.000492315 |
| chr6 | 30800001 | 30900000 | 1002 | 1061 | 30850000 | -0.15491 | 0.013998804 |
| chr6 | 30850001 | 30950000 | 1043 | 1086 | 30900000 | -0.13066 | 0.031859224 |
| chr6 | 31250001 | 31350000 | 800  | 827  | 31300000 | -0.12026 | 0.043921849 |
| chr6 | 31300001 | 31400000 | 760  | 825  | 31350000 | -0.19077 | 0.003432174 |
| chr6 | 31350001 | 31450000 | 796  | 879  | 31400000 | -0.21547 | 0.00114047  |
| chr6 | 31400001 | 31500000 | 746  | 898  | 31450000 | -0.33991 | 8.53E-07    |
| chr6 | 31450001 | 31550000 | 835  | 935  | 31500000 | -0.23556 | 0.000429411 |
| chr6 | 31600001 | 31700000 | 1013 | 1045 | 31650000 | -0.11724 | 0.048044665 |
| chr6 | 31750001 | 31850000 | 812  | 840  | 31800000 | -0.12128 | 0.04259223  |

|      |          |          |      |      |          |          |             |
|------|----------|----------|------|------|----------|----------|-------------|
| chr6 | 32000001 | 32100000 | 869  | 910  | 32050000 | -0.13888 | 0.024386218 |
| chr6 | 32050001 | 32150000 | 995  | 1092 | 32100000 | -0.20658 | 0.001716954 |
| chr6 | 32100001 | 32200000 | 967  | 1016 | 32150000 | -0.14368 | 0.020748856 |
| chr6 | 32350001 | 32450000 | 808  | 864  | 32400000 | -0.16905 | 0.008265076 |
| chr6 | 32400001 | 32500000 | 439  | 501  | 32450000 | -0.26296 | 0.000100946 |
| chr6 | 32500001 | 32600000 | 423  | 361  | 32550000 | 0.156287 | 0.013526988 |
| chr6 | 32600001 | 32700000 | 590  | 497  | 32650000 | 0.175097 | 0.006664021 |
| chr6 | 33250001 | 33350000 | 731  | 808  | 33300000 | -0.21686 | 0.001068482 |
| chr6 | 33300001 | 33400000 | 784  | 841  | 33350000 | -0.17362 | 0.006916053 |
| chr6 | 33350001 | 33450000 | 979  | 1035 | 33400000 | -0.15262 | 0.015197017 |
| chr6 | 33500001 | 33600000 | 828  | 941  | 33550000 | -0.25694 | 0.000140393 |
| chr6 | 33550001 | 33650000 | 1013 | 1135 | 33600000 | -0.23643 | 0.000411003 |
| chr6 | 33600001 | 33700000 | 1130 | 1226 | 33650000 | -0.19001 | 0.003544164 |
| chr6 | 33650001 | 33750000 | 1164 | 1246 | 33700000 | -0.17058 | 0.007788151 |
| chr6 | 33700001 | 33800000 | 1159 | 1202 | 33750000 | -0.12493 | 0.038112575 |
| chr6 | 33950001 | 34050000 | 1151 | 1328 | 3.40E+07 | -0.27874 | 4.13E-05    |
| chr6 | 34000001 | 34100000 | 1147 | 1355 | 34050000 | -0.3128  | 5.16E-06    |
| chr6 | 34050001 | 34150000 | 1063 | 1197 | 34100000 | -0.24365 | 0.000283939 |
| chr6 | 34100001 | 34200000 | 899  | 962  | 34150000 | -0.17009 | 0.007939715 |
| chr6 | 34150001 | 34250000 | 791  | 845  | 34200000 | -0.16765 | 0.008722473 |
| chr6 | 34200001 | 34300000 | 811  | 845  | 34250000 | -0.13162 | 0.030894967 |
| chr6 | 34450001 | 34550000 | 1099 | 1142 | 34500000 | -0.12774 | 0.034924595 |
| chr6 | 34600001 | 34700000 | 868  | 760  | 34650000 | 0.119324 | 0.045501322 |
| chr6 | 34850001 | 34950000 | 1009 | 871  | 34900000 | 0.13981  | 0.023913484 |
| chr6 | 34900001 | 35000000 | 990  | 851  | 34950000 | 0.145898 | 0.019480172 |
| chr6 | 35200001 | 35300000 | 950  | 1036 | 35250000 | -0.1974  | 0.002580971 |
| chr6 | 35250001 | 35350000 | 901  | 957  | 35300000 | -0.15936 | 0.011904224 |
| chr6 | 35450001 | 35550000 | 905  | 942  | 35500000 | -0.13018 | 0.032343889 |
| chr6 | 35500001 | 35600000 | 845  | 881  | 35550000 | -0.13256 | 0.029977404 |
| chr6 | 35800001 | 35900000 | 948  | 823  | 35850000 | 0.131623 | 0.031191267 |
| chr6 | 36150001 | 36250000 | 1039 | 1100 | 36200000 | -0.15468 | 0.014117407 |
| chr6 | 36200001 | 36300000 | 1016 | 1170 | 36250000 | -0.27598 | 4.84E-05    |
| chr6 | 36250001 | 36350000 | 1018 | 1129 | 36300000 | -0.22168 | 0.000849709 |
| chr6 | 36550001 | 36650000 | 873  | 921  | 36600000 | -0.14959 | 0.016916007 |
| chr6 | 36600001 | 36700000 | 954  | 1012 | 36650000 | -0.15752 | 0.012736529 |
| chr6 | 36700001 | 36800000 | 1134 | 1172 | 36750000 | -0.11992 | 0.044365328 |
| chr6 | 36750001 | 36850000 | 1084 | 1123 | 36800000 | -0.12336 | 0.039983227 |
| chr6 | 36800001 | 36900000 | 996  | 1058 | 36850000 | -0.15949 | 0.011847295 |
| chr6 | 36900001 | 37000000 | 1068 | 1120 | 36950000 | -0.14096 | 0.022752196 |
| chr6 | 36950001 | 37050000 | 989  | 1030 | 3.70E+07 | -0.13097 | 0.031539619 |
| chr6 | 37550001 | 37650000 | 1105 | 1144 | 37600000 | -0.12241 | 0.041159296 |
| chr6 | 37600001 | 37700000 | 1048 | 1093 | 37650000 | -0.13303 | 0.029533478 |
| chr6 | 37650001 | 37750000 | 992  | 1025 | 37700000 | -0.11958 | 0.044818634 |
| chr6 | 38550001 | 38650000 | 928  | 968  | 38600000 | -0.13325 | 0.029317775 |
| chr6 | 38650001 | 38750000 | 998  | 855  | 38700000 | 0.150744 | 0.016471091 |
| chr6 | 39100001 | 39200000 | 1015 | 1079 | 39150000 | -0.16059 | 0.011378446 |
| chr6 | 39150001 | 39250000 | 1027 | 1063 | 39200000 | -0.12208 | 0.041579892 |

|      |          |          |      |      |          |          |             |
|------|----------|----------|------|------|----------|----------|-------------|
| chr6 | 39250001 | 39350000 | 1095 | 1150 | 39300000 | -0.14307 | 0.021183443 |
| chr6 | 39350001 | 39450000 | 961  | 993  | 39400000 | -0.11963 | 0.044757893 |
| chr6 | 39400001 | 39500000 | 900  | 946  | 39450000 | -0.14429 | 0.020326749 |
| chr6 | 40050001 | 40150000 | 1070 | 1139 | 40100000 | -0.16253 | 0.010585378 |
| chr6 | 40100001 | 40200000 | 1069 | 1132 | 40150000 | -0.15498 | 0.013963556 |
| chr6 | 40400001 | 40500000 | 1132 | 1186 | 40450000 | -0.1396  | 0.023809107 |
| chr6 | 40450001 | 40550000 | 1113 | 1162 | 40500000 | -0.13453 | 0.028134022 |
| chr6 | 40650001 | 40750000 | 1135 | 1172 | 40700000 | -0.11865 | 0.046079712 |
| chr6 | 40700001 | 40800000 | 1107 | 1159 | 40750000 | -0.1386  | 0.024618009 |
| chr6 | 40750001 | 40850000 | 1032 | 1090 | 40800000 | -0.15126 | 0.015951634 |
| chr6 | 40800001 | 40900000 | 1041 | 1128 | 40850000 | -0.18817 | 0.003829498 |
| chr6 | 40950001 | 41050000 | 1054 | 1127 | 4.10E+07 | -0.16898 | 0.00828528  |
| chr6 | 41000001 | 41100000 | 986  | 1026 | 41050000 | -0.12974 | 0.032795634 |
| chr6 | 41300001 | 41400000 | 1083 | 1124 | 41350000 | -0.12598 | 0.036893851 |
| chr6 | 41350001 | 41450000 | 1082 | 1132 | 41400000 | -0.13755 | 0.025489538 |
| chr6 | 41400001 | 41500000 | 1081 | 1147 | 41450000 | -0.15787 | 0.012574409 |
| chr6 | 41450001 | 41550000 | 1095 | 1158 | 41500000 | -0.15308 | 0.014952708 |
| chr6 | 41500001 | 41600000 | 1038 | 1130 | 41550000 | -0.19489 | 0.0028775   |
| chr6 | 41550001 | 41650000 | 1034 | 1172 | 41600000 | -0.25311 | 0.00017254  |
| chr6 | 41600001 | 41700000 | 1108 | 1166 | 41650000 | -0.14598 | 0.019178509 |
| chr6 | 42550001 | 42650000 | 958  | 833  | 42600000 | 0.129337 | 0.033523903 |
| chr6 | 43050001 | 43150000 | 985  | 1039 | 43100000 | -0.14937 | 0.017046732 |
| chr6 | 43100001 | 43200000 | 987  | 1074 | 43150000 | -0.19424 | 0.002958487 |
| chr6 | 43150001 | 43250000 | 1078 | 1122 | 43200000 | -0.13009 | 0.032440146 |
| chr6 | 43200001 | 43300000 | 1072 | 1112 | 43250000 | -0.12522 | 0.037767055 |
| chr6 | 43450001 | 43550000 | 905  | 958  | 43500000 | -0.15448 | 0.014219346 |
| chr6 | 43700001 | 43800000 | 1134 | 1235 | 43750000 | -0.19546 | 0.002807037 |
| chr6 | 43750001 | 43850000 | 1158 | 1258 | 43800000 | -0.19187 | 0.003275145 |
| chr6 | 43800001 | 43900000 | 1148 | 1242 | 43850000 | -0.18591 | 0.004207315 |
| chr6 | 43900001 | 44000000 | 1106 | 1143 | 43950000 | -0.11985 | 0.044468861 |
| chr6 | 43950001 | 44050000 | 1166 | 1221 | 4.40E+07 | -0.13887 | 0.024398335 |
| chr6 | 44000001 | 44100000 | 1080 | 1152 | 44050000 | -0.16548 | 0.009472046 |
| chr6 | 44050001 | 44150000 | 1002 | 1069 | 44100000 | -0.16575 | 0.009375571 |
| chr6 | 44350001 | 44450000 | 995  | 1027 | 44400000 | -0.11804 | 0.046924308 |
| chr6 | 44400001 | 44500000 | 1051 | 1123 | 44450000 | -0.16797 | 0.008615654 |
| chr6 | 44450001 | 44550000 | 1082 | 1129 | 44500000 | -0.13372 | 0.028883181 |
| chr6 | 44500001 | 44600000 | 1032 | 1092 | 44550000 | -0.1539  | 0.014517508 |
| chr6 | 44550001 | 44650000 | 1028 | 1085 | 44600000 | -0.15023 | 0.01654246  |
| chr6 | 44700001 | 44800000 | 918  | 787  | 44750000 | 0.149759 | 0.017048058 |
| chr6 | 44750001 | 44850000 | 986  | 809  | 44800000 | 0.213076 | 0.001322213 |
| chr6 | 45050001 | 45150000 | 939  | 802  | 45100000 | 0.155151 | 0.014090085 |
| chr6 | 45200001 | 45300000 | 885  | 768  | 45250000 | 0.132199 | 0.030624623 |
| chr6 | 45250001 | 45350000 | 937  | 792  | 45300000 | 0.170177 | 0.00806763  |
| chr6 | 46050001 | 46150000 | 969  | 849  | 46100000 | 0.11836  | 0.046816515 |
| chr6 | 46100001 | 46200000 | 1006 | 821  | 46150000 | 0.220804 | 0.000922521 |
| chr6 | 46150001 | 46250000 | 1049 | 918  | 46200000 | 0.120077 | 0.044494381 |
| chr6 | 46450001 | 46550000 | 1041 | 911  | 46500000 | 0.120075 | 0.044496382 |

|      |          |          |      |      |          |          |             |
|------|----------|----------|------|------|----------|----------|-------------|
| chr6 | 47500001 | 47600000 | 1018 | 829  | 47550000 | 0.223922 | 0.000795497 |
| chr6 | 47550001 | 47650000 | 1001 | 815  | 47600000 | 0.224198 | 0.00078505  |
| chr6 | 47900001 | 48000000 | 1012 | 858  | 47950000 | 0.165788 | 0.009533289 |
| chr6 | 48300001 | 48400000 | 971  | 834  | 48350000 | 0.147052 | 0.01872371  |
| chr6 | 48450001 | 48550000 | 974  | 793  | 48500000 | 0.224229 | 0.000783891 |
| chr6 | 48500001 | 48600000 | 1094 | 863  | 48550000 | 0.269809 | 7.39E-05    |
| chr6 | 49000001 | 49100000 | 942  | 808  | 49050000 | 0.149    | 0.017504298 |
| chr6 | 49050001 | 49150000 | 929  | 807  | 49100000 | 0.130738 | 0.032077731 |
| chr6 | 49200001 | 49300000 | 942  | 811  | 49250000 | 0.143653 | 0.021025359 |
| chr6 | 49250001 | 49350000 | 996  | 830  | 49300000 | 0.190663 | 0.003540577 |
| chr6 | 49500001 | 49600000 | 923  | 800  | 49550000 | 0.133959 | 0.028947918 |
| chr6 | 49550001 | 49650000 | 941  | 825  | 49600000 | 0.117429 | 0.048116954 |
| chr6 | 49750001 | 49850000 | 991  | 865  | 49800000 | 0.123813 | 0.039761452 |
| chr6 | 50550001 | 50650000 | 902  | 789  | 50600000 | 0.12073  | 0.043635146 |
| chr6 | 50600001 | 50700000 | 1037 | 885  | 50650000 | 0.156295 | 0.013523235 |
| chr6 | 50800001 | 50900000 | 927  | 959  | 50850000 | -0.12133 | 0.042525637 |
| chr6 | 51150001 | 51250000 | 1020 | 879  | 51200000 | 0.142262 | 0.022034439 |
| chr6 | 51200001 | 51300000 | 1039 | 860  | 51250000 | 0.200415 | 0.002331424 |
| chr6 | 51450001 | 51550000 | 1043 | 881  | 51500000 | 0.171153 | 0.007769908 |
| chr6 | 51500001 | 51600000 | 1016 | 854  | 51550000 | 0.178221 | 0.00588972  |
| chr6 | 51550001 | 51650000 | 1065 | 927  | 51600000 | 0.12784  | 0.035128523 |
| chr6 | 51650001 | 51750000 | 879  | 906  | 51700000 | -0.11602 | 0.049797959 |
| chr6 | 52450001 | 52550000 | 936  | 987  | 52500000 | -0.14891 | 0.017322598 |
| chr6 | 52600001 | 52700000 | 549  | 566  | 52650000 | -0.11637 | 0.049293039 |
| chr6 | 52750001 | 52850000 | 875  | 763  | 52800000 | 0.125228 | 0.038079817 |
| chr6 | 52900001 | 53000000 | 1059 | 858  | 52950000 | 0.231281 | 0.000556973 |
| chr6 | 52950001 | 53050000 | 963  | 812  | 5.30E+07 | 0.173684 | 0.007043069 |
| chr6 | 53850001 | 53950000 | 986  | 828  | 53900000 | 0.179585 | 0.005577364 |
| chr6 | 53900001 | 54000000 | 1080 | 886  | 53950000 | 0.213281 | 0.001309839 |
| chr6 | 53950001 | 54050000 | 1135 | 917  | 5.40E+07 | 0.235327 | 0.00045603  |
| chr6 | 54000001 | 54100000 | 1037 | 894  | 54050000 | 0.141697 | 0.022455797 |
| chr6 | 54200001 | 54300000 | 1060 | 867  | 54250000 | 0.217589 | 0.001072938 |
| chr6 | 54250001 | 54350000 | 989  | 840  | 54300000 | 0.163209 | 0.010499228 |
| chr6 | 54350001 | 54450000 | 950  | 817  | 54400000 | 0.14522  | 0.019936409 |
| chr6 | 54550001 | 54650000 | 1013 | 886  | 54600000 | 0.120884 | 0.043435369 |
| chr6 | 54850001 | 54950000 | 1008 | 863  | 54900000 | 0.151691 | 0.015931779 |
| chr6 | 54900001 | 55000000 | 887  | 774  | 54950000 | 0.124229 | 0.039261364 |
| chr6 | 54950001 | 55050000 | 839  | 726  | 5.50E+07 | 0.136329 | 0.026810579 |
| chr6 | 55000001 | 55100000 | 955  | 836  | 55050000 | 0.119626 | 0.045095063 |
| chr6 | 55250001 | 55350000 | 1075 | 938  | 55300000 | 0.124305 | 0.039170124 |
| chr6 | 55300001 | 55400000 | 1062 | 881  | 55350000 | 0.197198 | 0.002680876 |
| chr6 | 55350001 | 55450000 | 1037 | 876  | 55400000 | 0.171041 | 0.007803586 |
| chr6 | 55900001 | 56000000 | 1020 | 864  | 55950000 | 0.167094 | 0.009074417 |
| chr6 | 55950001 | 56050000 | 1024 | 832  | 5.60E+07 | 0.227189 | 0.000679876 |
| chr6 | 56000001 | 56100000 | 975  | 823  | 56050000 | 0.172138 | 0.00747963  |
| chr6 | 56600001 | 56700000 | 957  | 833  | 56650000 | 0.127831 | 0.035139186 |
| chr6 | 57200001 | 57300000 | 1665 | 1460 | 57250000 | 0.117182 | 0.048466313 |

|      |          |          |      |     |          |          |             |
|------|----------|----------|------|-----|----------|----------|-------------|
| chr6 | 57650001 | 57750000 | 455  | 469 | 57700000 | -0.11609 | 0.04969099  |
| chr6 | 57800001 | 57900000 | 198  | 155 | 57850000 | 0.28086  | 3.95E-05    |
| chr6 | 57900001 | 58000000 | 262  | 314 | 57950000 | -0.33357 | 1.31E-06    |
| chr6 | 57950001 | 58050000 | 427  | 496 | 5.80E+07 | -0.28848 | 2.33E-05    |
| chr6 | 58000001 | 58100000 | 281  | 305 | 58050000 | -0.19061 | 0.003454883 |
| chr6 | 58050001 | 58150000 | 71   | 77  | 58100000 | -0.18941 | 0.00363458  |
| chr6 | 58100001 | 58200000 | 94   | 104 | 58150000 | -0.21822 | 0.001001743 |
| chr6 | 58150001 | 58250000 | 94   | 98  | 58200000 | -0.13249 | 0.03004455  |
| chr6 | 58200001 | 58300000 | 66   | 71  | 58250000 | -0.17772 | 0.005876707 |
| chr6 | 58350001 | 58450000 | 208  | 166 | 58400000 | 0.253029 | 0.000183869 |
| chr6 | 58400001 | 58500000 | 210  | 165 | 58450000 | 0.275552 | 5.35E-05    |
| chr6 | 58450001 | 58550000 | 164  | 135 | 58500000 | 0.208365 | 0.001638269 |
| chr6 | 58500001 | 58600000 | 202  | 220 | 58550000 | -0.19552 | 0.002800027 |
| chr6 | 58550001 | 58650000 | 314  | 337 | 58600000 | -0.17436 | 0.006719411 |
| chr6 | 58650001 | 58750000 | 271  | 220 | 58700000 | 0.228418 | 0.000640558 |
| chr6 | 61800001 | 61900000 | 134  | 147 | 61850000 | -0.20595 | 0.001765816 |
| chr6 | 62100001 | 62200000 | 215  | 170 | 62150000 | 0.26643  | 8.92E-05    |
| chr6 | 62150001 | 62250000 | 540  | 439 | 62200000 | 0.226367 | 0.0007074   |
| chr6 | 62200001 | 62300000 | 913  | 759 | 62250000 | 0.194143 | 0.003055936 |
| chr6 | 62450001 | 62550000 | 958  | 834 | 62500000 | 0.127607 | 0.035384881 |
| chr6 | 62650001 | 62750000 | 1034 | 879 | 62700000 | 0.161929 | 0.011009786 |
| chr6 | 62850001 | 62950000 | 1029 | 901 | 62900000 | 0.119272 | 0.045571064 |
| chr6 | 63100001 | 63200000 | 990  | 849 | 63150000 | 0.149292 | 0.01732737  |
| chr6 | 63150001 | 63250000 | 1054 | 894 | 63200000 | 0.165156 | 0.009762387 |
| chr6 | 63200001 | 63300000 | 887  | 768 | 63250000 | 0.135456 | 0.027582183 |
| chr6 | 63350001 | 63450000 | 1009 | 863 | 63400000 | 0.153122 | 0.01514656  |
| chr6 | 63400001 | 63500000 | 1020 | 858 | 63450000 | 0.177148 | 0.006146151 |
| chr6 | 63600001 | 63700000 | 990  | 816 | 63650000 | 0.206488 | 0.00178238  |
| chr6 | 63650001 | 63750000 | 892  | 725 | 63700000 | 0.226691 | 0.000696419 |
| chr6 | 64750001 | 64850000 | 978  | 858 | 64800000 | 0.116485 | 0.049463965 |
| chr6 | 64950001 | 65050000 | 966  | 837 | 6.50E+07 | 0.134424 | 0.028517894 |
| chr6 | 65000001 | 65100000 | 900  | 780 | 65050000 | 0.134079 | 0.028836197 |
| chr6 | 65200001 | 65300000 | 976  | 799 | 65250000 | 0.216314 | 0.001138572 |
| chr6 | 65250001 | 65350000 | 916  | 759 | 65300000 | 0.198876 | 0.00249311  |
| chr6 | 65350001 | 65450000 | 954  | 775 | 65400000 | 0.227421 | 0.000672265 |
| chr6 | 65400001 | 65500000 | 1003 | 853 | 65450000 | 0.161332 | 0.011255285 |
| chr6 | 65500001 | 65600000 | 1053 | 893 | 65550000 | 0.165402 | 0.009672871 |
| chr6 | 65750001 | 65850000 | 1047 | 908 | 65800000 | 0.133125 | 0.029732312 |
| chr6 | 65800001 | 65900000 | 1011 | 873 | 65850000 | 0.139358 | 0.024274235 |
| chr6 | 65850001 | 65950000 | 1059 | 901 | 65900000 | 0.160732 | 0.01150691  |
| chr6 | 66050001 | 66150000 | 1001 | 868 | 66100000 | 0.133303 | 0.029563513 |
| chr6 | 66100001 | 66200000 | 996  | 835 | 66150000 | 0.181998 | 0.005061014 |
| chr6 | 66150001 | 66250000 | 950  | 830 | 66200000 | 0.122444 | 0.041445259 |
| chr6 | 66250001 | 66350000 | 919  | 802 | 66300000 | 0.124091 | 0.039426736 |
| chr6 | 66400001 | 66500000 | 996  | 863 | 66450000 | 0.134413 | 0.02852744  |
| chr6 | 66550001 | 66650000 | 960  | 823 | 66600000 | 0.14977  | 0.017041248 |
| chr6 | 66600001 | 66700000 | 971  | 807 | 66650000 | 0.194531 | 0.00300585  |

|      |          |          |      |     |          |          |             |
|------|----------|----------|------|-----|----------|----------|-------------|
| chr6 | 66950001 | 67050000 | 968  | 802 | 6.70E+07 | 0.199033 | 0.002476155 |
| chr6 | 67100001 | 67200000 | 1020 | 884 | 67150000 | 0.134079 | 0.028836197 |
| chr6 | 67400001 | 67500000 | 1045 | 888 | 67450000 | 0.1625   | 0.010779726 |
| chr6 | 67450001 | 67550000 | 1039 | 853 | 67500000 | 0.212206 | 0.001375989 |
| chr6 | 67850001 | 67950000 | 991  | 826 | 67900000 | 0.190372 | 0.003584097 |
| chr6 | 67900001 | 68000000 | 945  | 812 | 67950000 | 0.146463 | 0.019106642 |
| chr6 | 68000001 | 68100000 | 1000 | 873 | 68050000 | 0.123575 | 0.040050748 |
| chr6 | 68150001 | 68250000 | 966  | 818 | 68200000 | 0.167551 | 0.008918716 |
| chr6 | 68200001 | 68300000 | 1004 | 813 | 68250000 | 0.23206  | 0.000536055 |
| chr6 | 68250001 | 68350000 | 995  | 789 | 68300000 | 0.262299 | 0.000111817 |
| chr6 | 68300001 | 68400000 | 1030 | 808 | 68350000 | 0.277845 | 4.70E-05    |
| chr6 | 68350001 | 68450000 | 1005 | 825 | 68400000 | 0.212358 | 0.001366484 |
| chr6 | 69150001 | 69250000 | 940  | 773 | 69200000 | 0.209821 | 0.001533912 |
| chr6 | 69200001 | 69300000 | 994  | 853 | 69250000 | 0.148328 | 0.017916857 |
| chr6 | 69300001 | 69400000 | 928  | 811 | 69350000 | 0.122051 | 0.041939657 |
| chr6 | 69350001 | 69450000 | 1001 | 854 | 69400000 | 0.156762 | 0.013297279 |
| chr6 | 69400001 | 69500000 | 980  | 852 | 69450000 | 0.129557 | 0.033294148 |
| chr6 | 69600001 | 69700000 | 1054 | 906 | 69650000 | 0.14592  | 0.019465172 |
| chr6 | 69850001 | 69950000 | 1078 | 899 | 69900000 | 0.189592 | 0.003702945 |
| chr6 | 69900001 | 70000000 | 1025 | 892 | 69950000 | 0.128137 | 0.034806199 |
| chr6 | 70600001 | 70700000 | 1070 | 930 | 70650000 | 0.129936 | 0.032899008 |
| chr6 | 70650001 | 70750000 | 982  | 840 | 70700000 | 0.152962 | 0.0152327   |
| chr6 | 70900001 | 71000000 | 1026 | 895 | 70950000 | 0.124699 | 0.038701322 |
| chr6 | 70950001 | 71050000 | 915  | 767 | 7.10E+07 | 0.182173 | 0.005025151 |
| chr6 | 71100001 | 71200000 | 1042 | 833 | 71150000 | 0.250595 | 0.000208994 |
| chr6 | 71150001 | 71250000 | 947  | 788 | 71200000 | 0.192797 | 0.003235783 |
| chr6 | 72100001 | 72200000 | 1104 | 926 | 72150000 | 0.181284 | 0.005209071 |
| chr6 | 72150001 | 72250000 | 1103 | 924 | 72200000 | 0.183096 | 0.004840404 |
| chr6 | 72300001 | 72400000 | 1120 | 939 | 72350000 | 0.18193  | 0.005074936 |
| chr6 | 72350001 | 72450000 | 1099 | 946 | 72400000 | 0.143908 | 0.020845301 |
| chr6 | 72450001 | 72550000 | 878  | 753 | 72500000 | 0.149199 | 0.017383451 |
| chr6 | 72700001 | 72800000 | 1024 | 880 | 72750000 | 0.146269 | 0.019234364 |
| chr6 | 72750001 | 72850000 | 989  | 846 | 72800000 | 0.152941 | 0.01524395  |
| chr6 | 72900001 | 73000000 | 1050 | 911 | 72950000 | 0.132495 | 0.030337783 |
| chr6 | 73100001 | 73200000 | 896  | 933 | 73150000 | -0.13075 | 0.031764765 |
| chr6 | 73250001 | 73350000 | 954  | 833 | 73300000 | 0.123301 | 0.040384839 |
| chr6 | 73300001 | 73400000 | 1023 | 883 | 73350000 | 0.139949 | 0.023803287 |
| chr6 | 73350001 | 73450000 | 1042 | 886 | 73400000 | 0.161605 | 0.011142582 |
| chr6 | 73450001 | 73550000 | 1025 | 892 | 73500000 | 0.128137 | 0.034806199 |
| chr6 | 73500001 | 73600000 | 977  | 857 | 73550000 | 0.116692 | 0.049166628 |
| chr6 | 74000001 | 74100000 | 858  | 709 | 74050000 | 0.20282  | 0.002097818 |
| chr6 | 74300001 | 74400000 | 842  | 729 | 74350000 | 0.13553  | 0.027516435 |
| chr6 | 74350001 | 74450000 | 948  | 799 | 74400000 | 0.17432  | 0.006870298 |
| chr6 | 74800001 | 74900000 | 969  | 829 | 74850000 | 0.152753 | 0.01534592  |
| chr6 | 74850001 | 74950000 | 943  | 748 | 74900000 | 0.261848 | 0.000114599 |
| chr6 | 74900001 | 75000000 | 940  | 767 | 74950000 | 0.221062 | 0.000911338 |
| chr6 | 75000001 | 75100000 | 873  | 762 | 75050000 | 0.123819 | 0.039754521 |

|      |          |          |      |      |          |          |             |
|------|----------|----------|------|------|----------|----------|-------------|
| chr6 | 75400001 | 75500000 | 977  | 833  | 75450000 | 0.15767  | 0.012867693 |
| chr6 | 75450001 | 75550000 | 910  | 790  | 75500000 | 0.131642 | 0.031172194 |
| chr6 | 75550001 | 75650000 | 961  | 838  | 75600000 | 0.125214 | 0.0380959   |
| chr6 | 75600001 | 75700000 | 986  | 864  | 75650000 | 0.118185 | 0.047059721 |
| chr6 | 76000001 | 76100000 | 1035 | 879  | 76050000 | 0.163324 | 0.010454584 |
| chr6 | 76550001 | 76650000 | 983  | 835  | 76600000 | 0.163043 | 0.010564237 |
| chr6 | 77400001 | 77500000 | 897  | 767  | 77450000 | 0.15351  | 0.014939588 |
| chr6 | 77450001 | 77550000 | 916  | 802  | 77500000 | 0.119374 | 0.045434248 |
| chr6 | 77600001 | 77700000 | 902  | 747  | 77650000 | 0.199647 | 0.002410848 |
| chr6 | 77650001 | 77750000 | 952  | 785  | 77700000 | 0.205897 | 0.00183005  |
| chr6 | 77700001 | 77800000 | 928  | 807  | 77750000 | 0.129184 | 0.033685106 |
| chr6 | 77850001 | 77950000 | 989  | 848  | 77900000 | 0.149534 | 0.017181833 |
| chr6 | 78050001 | 78150000 | 1042 | 868  | 78100000 | 0.191217 | 0.003459085 |
| chr6 | 78100001 | 78200000 | 1073 | 921  | 78150000 | 0.148005 | 0.018118263 |
| chr6 | 78350001 | 78450000 | 776  | 679  | 78400000 | 0.120273 | 0.044234652 |
| chr6 | 78400001 | 78500000 | 771  | 656  | 78450000 | 0.160663 | 0.011535943 |
| chr6 | 78550001 | 78650000 | 899  | 759  | 78600000 | 0.171849 | 0.007563696 |
| chr6 | 79450001 | 79550000 | 813  | 667  | 79500000 | 0.213197 | 0.001314909 |
| chr6 | 79500001 | 79600000 | 811  | 709  | 79550000 | 0.121545 | 0.042583558 |
| chr6 | 79650001 | 79750000 | 1000 | 857  | 79700000 | 0.150261 | 0.016751625 |
| chr6 | 79750001 | 79850000 | 990  | 1027 | 79800000 | -0.12531 | 0.037669475 |
| chr6 | 79900001 | 80000000 | 943  | 793  | 79950000 | 0.177565 | 0.006045249 |
| chr6 | 79950001 | 80050000 | 900  | 712  | 8.00E+07 | 0.265676 | 9.29E-05    |
| chr6 | 80000001 | 80100000 | 851  | 703  | 80050000 | 0.203263 | 0.002057238 |
| chr6 | 80850001 | 80950000 | 1060 | 887  | 80900000 | 0.184686 | 0.004536273 |
| chr6 | 81000001 | 81100000 | 930  | 771  | 81050000 | 0.198128 | 0.002575275 |
| chr6 | 81050001 | 81150000 | 885  | 733  | 81100000 | 0.199492 | 0.002427168 |
| chr6 | 81200001 | 81300000 | 893  | 757  | 81250000 | 0.165995 | 0.009459189 |
| chr6 | 81450001 | 81550000 | 839  | 701  | 81500000 | 0.186885 | 0.004144078 |
| chr6 | 81500001 | 81600000 | 818  | 696  | 81550000 | 0.160642 | 0.011545067 |
| chr6 | 81550001 | 81650000 | 886  | 758  | 81600000 | 0.152737 | 0.015354457 |
| chr6 | 81600001 | 81700000 | 1043 | 835  | 81650000 | 0.248519 | 0.000232935 |
| chr6 | 81650001 | 81750000 | 1049 | 847  | 81700000 | 0.236209 | 0.000436408 |
| chr6 | 81700001 | 81800000 | 975  | 786  | 81750000 | 0.238501 | 0.000389037 |
| chr6 | 81750001 | 81850000 | 927  | 779  | 81800000 | 0.178574 | 0.005807316 |
| chr6 | 81800001 | 81900000 | 956  | 819  | 81850000 | 0.150775 | 0.016452762 |
| chr6 | 82150001 | 82250000 | 966  | 819  | 82200000 | 0.165788 | 0.009533289 |
| chr6 | 82200001 | 82300000 | 940  | 803  | 82250000 | 0.154889 | 0.014222882 |
| chr6 | 82850001 | 82950000 | 912  | 788  | 82900000 | 0.138466 | 0.024998822 |
| chr6 | 83150001 | 83250000 | 919  | 778  | 83200000 | 0.167923 | 0.008793434 |
| chr6 | 83200001 | 83300000 | 857  | 747  | 83250000 | 0.125815 | 0.037399524 |
| chr6 | 83250001 | 83350000 | 892  | 752  | 83300000 | 0.173939 | 0.006973291 |
| chr6 | 83300001 | 83400000 | 1006 | 822  | 83350000 | 0.219048 | 0.001002067 |
| chr6 | 84050001 | 84150000 | 944  | 813  | 84100000 | 0.14316  | 0.021378859 |
| chr6 | 84100001 | 84200000 | 951  | 795  | 84150000 | 0.186119 | 0.004277133 |
| chr6 | 84150001 | 84250000 | 925  | 789  | 84200000 | 0.157056 | 0.013156822 |
| chr6 | 84600001 | 84700000 | 889  | 770  | 84650000 | 0.134953 | 0.028034729 |



|      |          |          |      |      |          |          |             |
|------|----------|----------|------|------|----------|----------|-------------|
| chr6 | 85150001 | 85250000 | 979  | 853  | 85200000 | 0.126391 | 0.036741519 |
| chr6 | 85450001 | 85550000 | 981  | 848  | 85500000 | 0.137817 | 0.025538113 |
| chr6 | 85500001 | 85600000 | 968  | 766  | 85550000 | 0.265291 | 9.49E-05    |
| chr6 | 85550001 | 85650000 | 1050 | 875  | 85600000 | 0.190663 | 0.003540577 |
| chr6 | 85650001 | 85750000 | 893  | 934  | 85700000 | -0.13713 | 0.025837106 |
| chr6 | 85850001 | 85950000 | 904  | 793  | 85900000 | 0.11663  | 0.049254943 |
| chr6 | 85900001 | 86000000 | 922  | 804  | 85950000 | 0.125199 | 0.038113349 |
| chr6 | 86000001 | 86100000 | 732  | 760  | 86050000 | -0.12653 | 0.036273189 |
| chr6 | 86300001 | 86400000 | 865  | 902  | 86350000 | -0.1328  | 0.029750333 |
| chr6 | 86700001 | 86800000 | 722  | 630  | 86750000 | 0.124275 | 0.03920577  |
| chr6 | 86900001 | 87000000 | 861  | 734  | 86950000 | 0.157861 | 0.012778834 |
| chr6 | 87300001 | 87400000 | 695  | 725  | 87350000 | -0.13334 | 0.02923681  |
| chr6 | 87400001 | 87500000 | 927  | 765  | 87450000 | 0.204738 | 0.001927047 |
| chr6 | 87450001 | 87550000 | 978  | 784  | 87500000 | 0.246609 | 0.000257213 |
| chr6 | 87550001 | 87650000 | 767  | 660  | 87600000 | 0.144389 | 0.020507938 |
| chr6 | 87600001 | 87700000 | 944  | 816  | 87650000 | 0.137846 | 0.025513958 |
| chr6 | 88050001 | 88150000 | 964  | 838  | 88100000 | 0.129711 | 0.033132874 |
| chr6 | 88750001 | 88850000 | 1062 | 931  | 88800000 | 0.117559 | 0.047933617 |
| chr6 | 89650001 | 89750000 | 861  | 748  | 89700000 | 0.130603 | 0.032214773 |
| chr6 | 89700001 | 89800000 | 914  | 745  | 89750000 | 0.222582 | 0.00084797  |
| chr6 | 89750001 | 89850000 | 883  | 770  | 89800000 | 0.125183 | 0.038132347 |
| chr6 | 90750001 | 90850000 | 956  | 1006 | 90800000 | -0.14592 | 0.019219604 |
| chr6 | 90900001 | 91000000 | 1119 | 980  | 90950000 | 0.118985 | 0.045960944 |
| chr6 | 91450001 | 91550000 | 1090 | 956  | 91500000 | 0.116874 | 0.048905446 |
| chr6 | 92200001 | 92300000 | 1081 | 938  | 92250000 | 0.132335 | 0.030492643 |
| chr6 | 92350001 | 92450000 | 1047 | 856  | 92400000 | 0.218207 | 0.001042369 |
| chr6 | 92400001 | 92500000 | 1048 | 901  | 92450000 | 0.145668 | 0.019633735 |
| chr6 | 92450001 | 92550000 | 1033 | 889  | 92500000 | 0.144213 | 0.020630509 |
| chr6 | 92500001 | 92600000 | 984  | 852  | 92550000 | 0.135433 | 0.027602667 |
| chr6 | 92700001 | 92800000 | 1024 | 863  | 92750000 | 0.174411 | 0.006845681 |
| chr6 | 92750001 | 92850000 | 1007 | 870  | 92800000 | 0.138605 | 0.024885301 |
| chr6 | 92800001 | 92900000 | 1037 | 897  | 92850000 | 0.136864 | 0.026347187 |
| chr6 | 93000001 | 93100000 | 1053 | 887  | 93050000 | 0.175128 | 0.006656089 |
| chr6 | 93050001 | 93150000 | 1033 | 837  | 93100000 | 0.231169 | 0.000560051 |
| chr6 | 93700001 | 93800000 | 932  | 813  | 93750000 | 0.124703 | 0.03869723  |
| chr6 | 93750001 | 93850000 | 1015 | 885  | 93800000 | 0.125359 | 0.037927816 |
| chr6 | 93800001 | 93900000 | 995  | 869  | 93850000 | 0.122969 | 0.040793705 |
| chr6 | 94350001 | 94450000 | 909  | 995  | 94400000 | -0.20279 | 0.002035179 |
| chr6 | 94450001 | 94550000 | 976  | 832  | 94500000 | 0.157926 | 0.01274899  |
| chr6 | 94600001 | 94700000 | 1069 | 937  | 94650000 | 0.117769 | 0.047638557 |
| chr6 | 94700001 | 94800000 | 1059 | 922  | 94750000 | 0.127492 | 0.03551075  |
| chr6 | 94750001 | 94850000 | 1081 | 918  | 94800000 | 0.163429 | 0.010413881 |
| chr6 | 94900001 | 95000000 | 950  | 786  | 94950000 | 0.201026 | 0.002269923 |
| chr6 | 94950001 | 95050000 | 1026 | 882  | 9.50E+07 | 0.145808 | 0.019539702 |
| chr6 | 95300001 | 95400000 | 1019 | 862  | 95350000 | 0.169023 | 0.008432469 |
| chr6 | 95350001 | 95450000 | 1004 | 833  | 95400000 | 0.196999 | 0.002703972 |
| chr6 | 95400001 | 95500000 | 932  | 767  | 95450000 | 0.208732 | 0.001611371 |

|      |          |          |      |     |           |          |             |
|------|----------|----------|------|-----|-----------|----------|-------------|
| chr6 | 95650001 | 95750000 | 240  | 199 | 95700000  | 0.197894 | 0.002601471 |
| chr6 | 95750001 | 95850000 | 168  | 186 | 95800000  | -0.21921 | 0.000955804 |
| chr6 | 95850001 | 95950000 | 900  | 772 | 95900000  | 0.148952 | 0.017533273 |
| chr6 | 95950001 | 96050000 | 1029 | 898 | 9.60E+07  | 0.124084 | 0.039435136 |
| chr6 | 96100001 | 96200000 | 983  | 842 | 96150000  | 0.150999 | 0.016324018 |
| chr6 | 96150001 | 96250000 | 949  | 773 | 96200000  | 0.223568 | 0.000809057 |
| chr6 | 96200001 | 96300000 | 940  | 746 | 96250000  | 0.261113 | 0.000119261 |
| chr6 | 96250001 | 96350000 | 954  | 777 | 96300000  | 0.223703 | 0.000803859 |
| chr6 | 96300001 | 96400000 | 971  | 814 | 96350000  | 0.182071 | 0.005046088 |
| chr6 | 96350001 | 96450000 | 975  | 802 | 96400000  | 0.209428 | 0.00156142  |
| chr6 | 96400001 | 96500000 | 1024 | 851 | 96450000  | 0.194613 | 0.002995344 |
| chr6 | 96450001 | 96550000 | 1047 | 865 | 96500000  | 0.203118 | 0.002070462 |
| chr6 | 96600001 | 96700000 | 950  | 829 | 96650000  | 0.124184 | 0.039315413 |
| chr6 | 97650001 | 97750000 | 1060 | 902 | 97700000  | 0.160493 | 0.011608285 |
| chr6 | 98000001 | 98100000 | 1016 | 871 | 98050000  | 0.149784 | 0.017033046 |
| chr6 | 98250001 | 98350000 | 1072 | 938 | 98300000  | 0.120273 | 0.044234652 |
| chr6 | 98400001 | 98500000 | 998  | 867 | 98450000  | 0.130636 | 0.032181366 |
| chr6 | 98450001 | 98550000 | 932  | 791 | 98500000  | 0.16428  | 0.010088067 |
| chr6 | 98650001 | 98750000 | 1008 | 861 | 98700000  | 0.155039 | 0.014146904 |
| chr6 | 99100001 | 99200000 | 918  | 955 | 99150000  | -0.12938 | 0.033175562 |
| chr6 | 99300001 | 99400000 | 1005 | 862 | 99350000  | 0.149064 | 0.017465439 |
| chr6 | 99550001 | 99650000 | 922  | 965 | 99600000  | -0.13813 | 0.024998612 |
| chr6 | 99900001 | 1E+08    | 937  | 813 | 99950000  | 0.132422 | 0.030408184 |
| chr6 | 99950001 | 1E+08    | 987  | 833 | 1.00E+08  | 0.172362 | 0.007414999 |
| chr6 | 1E+08    | 1E+08    | 1017 | 886 | 100050000 | 0.126569 | 0.036540213 |
| chr6 | 1E+08    | 1E+08    | 999  | 843 | 100350000 | 0.17258  | 0.007352388 |
| chr6 | 1E+08    | 1E+08    | 960  | 794 | 100400000 | 0.201524 | 0.002220978 |
| chr6 | 1E+08    | 1.01E+08 | 905  | 789 | 100450000 | 0.125521 | 0.037739537 |
| chr6 | 1.01E+08 | 1.01E+08 | 1138 | 939 | 100700000 | 0.204932 | 0.001910504 |
| chr6 | 1.01E+08 | 1.01E+08 | 1110 | 943 | 100750000 | 0.162858 | 0.010637198 |
| chr6 | 1.01E+08 | 1.01E+08 | 1079 | 864 | 101100000 | 0.24822  | 0.000236593 |
| chr6 | 1.01E+08 | 1.01E+08 | 1081 | 924 | 101150000 | 0.15403  | 0.014665634 |
| chr6 | 1.01E+08 | 1.01E+08 | 1064 | 908 | 101250000 | 0.156362 | 0.013490446 |
| chr6 | 1.02E+08 | 1.02E+08 | 989  | 851 | 101900000 | 0.14444  | 0.020472574 |
| chr6 | 1.02E+08 | 1.02E+08 | 975  | 838 | 101950000 | 0.14608  | 0.019358834 |
| chr6 | 1.02E+08 | 1.02E+08 | 1033 | 878 | 102050000 | 0.162176 | 0.0109099   |
| chr6 | 1.02E+08 | 1.02E+08 | 1044 | 912 | 102100000 | 0.122644 | 0.041195906 |
| chr6 | 1.02E+08 | 1.02E+08 | 1113 | 881 | 102150000 | 0.264868 | 9.72E-05    |
| chr6 | 1.02E+08 | 1.02E+08 | 1039 | 778 | 102200000 | 0.344982 | 6.93E-07    |
| chr6 | 1.02E+08 | 1.02E+08 | 1003 | 849 | 102250000 | 0.168113 | 0.00872996  |
| chr6 | 1.02E+08 | 1.02E+08 | 1086 | 911 | 102300000 | 0.181129 | 0.005241728 |
| chr6 | 1.02E+08 | 1.02E+08 | 1082 | 893 | 102350000 | 0.204597 | 0.001939173 |
| chr6 | 1.02E+08 | 1.02E+08 | 1094 | 921 | 102400000 | 0.175968 | 0.0064396   |
| chr6 | 1.02E+08 | 1.03E+08 | 1092 | 940 | 102450000 | 0.143868 | 0.020872919 |
| chr6 | 1.02E+08 | 1.03E+08 | 1007 | 872 | 102500000 | 0.135292 | 0.027729244 |
| chr6 | 1.03E+08 | 1.03E+08 | 1044 | 911 | 102800000 | 0.124227 | 0.039263502 |
| chr6 | 1.03E+08 | 1.03E+08 | 1060 | 865 | 102850000 | 0.22092  | 0.000917475 |

|      |          |          |      |      |           |          |             |
|------|----------|----------|------|------|-----------|----------|-------------|
| chr6 | 1.03E+08 | 1.03E+08 | 1037 | 844  | 102900000 | 0.224729 | 0.00076534  |
| chr6 | 1.03E+08 | 1.03E+08 | 1016 | 817  | 102950000 | 0.242121 | 0.000323879 |
| chr6 | 1.03E+08 | 1.03E+08 | 1011 | 845  | 1.03E+08  | 0.186388 | 0.004229922 |
| chr6 | 1.03E+08 | 1.03E+08 | 966  | 801  | 103150000 | 0.197849 | 0.002606542 |
| chr6 | 1.03E+08 | 1.03E+08 | 857  | 741  | 103250000 | 0.13745  | 0.025847401 |
| chr6 | 1.03E+08 | 1.03E+08 | 962  | 784  | 103300000 | 0.222811 | 0.000838761 |
| chr6 | 1.03E+08 | 1.03E+08 | 970  | 848  | 103350000 | 0.121549 | 0.042578193 |
| chr6 | 1.04E+08 | 1.04E+08 | 1047 | 864  | 103550000 | 0.204786 | 0.001922886 |
| chr6 | 1.04E+08 | 1.04E+08 | 1103 | 877  | 103600000 | 0.258412 | 0.000137993 |
| chr6 | 1.04E+08 | 1.04E+08 | 971  | 818  | 103650000 | 0.174999 | 0.006689884 |
| chr6 | 1.04E+08 | 1.04E+08 | 893  | 745  | 103700000 | 0.189048 | 0.003788083 |
| chr6 | 1.04E+08 | 1.04E+08 | 1010 | 840  | 103850000 | 0.193522 | 0.003137736 |
| chr6 | 1.04E+08 | 1.04E+08 | 969  | 834  | 103900000 | 0.144078 | 0.020725606 |
| chr6 | 1.04E+08 | 1.04E+08 | 936  | 804  | 104050000 | 0.146941 | 0.018795257 |
| chr6 | 1.04E+08 | 1.04E+08 | 999  | 775  | 104100000 | 0.293917 | 1.84E-05    |
| chr6 | 1.04E+08 | 1.04E+08 | 902  | 773  | 104150000 | 0.150287 | 0.016736329 |
| chr6 | 1.04E+08 | 1.04E+08 | 934  | 814  | 104200000 | 0.126022 | 0.03716225  |
| chr6 | 1.04E+08 | 1.04E+08 | 1031 | 857  | 104250000 | 0.194305 | 0.003034882 |
| chr6 | 1.04E+08 | 1.04E+08 | 1033 | 832  | 104300000 | 0.239813 | 0.000364125 |
| chr6 | 1.04E+08 | 1.04E+08 | 1034 | 866  | 104350000 | 0.183425 | 0.004775983 |
| chr6 | 1.04E+08 | 1.04E+08 | 1032 | 897  | 104400000 | 0.129891 | 0.032945713 |
| chr6 | 1.05E+08 | 1.05E+08 | 928  | 982  | 105100000 | -0.15397 | 0.014481978 |
| chr6 | 1.05E+08 | 1.05E+08 | 859  | 748  | 105250000 | 0.127248 | 0.035780667 |
| chr6 | 1.05E+08 | 1.05E+08 | 914  | 698  | 105300000 | 0.316595 | 4.52E-06    |
| chr6 | 1.05E+08 | 1.05E+08 | 959  | 809  | 105350000 | 0.173019 | 0.007227962 |
| chr6 | 1.05E+08 | 1.06E+08 | 919  | 805  | 105450000 | 0.118704 | 0.046343532 |
| chr6 | 1.06E+08 | 1.06E+08 | 1046 | 915  | 106350000 | 0.120667 | 0.043717297 |
| chr6 | 1.07E+08 | 1.07E+08 | 884  | 921  | 106700000 | -0.13153 | 0.030988501 |
| chr6 | 1.07E+08 | 1.07E+08 | 1011 | 873  | 106850000 | 0.139358 | 0.024274235 |
| chr6 | 1.07E+08 | 1.07E+08 | 861  | 754  | 107350000 | 0.119077 | 0.045835479 |
| chr6 | 1.08E+08 | 1.08E+08 | 901  | 761  | 108200000 | 0.171259 | 0.007738359 |
| chr6 | 1.08E+08 | 1.09E+08 | 996  | 1067 | 108450000 | -0.17171 | 0.007453306 |
| chr6 | 1.09E+08 | 1.09E+08 | 1051 | 866  | 109100000 | 0.206952 | 0.001745688 |
| chr6 | 1.09E+08 | 1.09E+08 | 1025 | 868  | 109150000 | 0.167485 | 0.008940876 |
| chr6 | 1.09E+08 | 1.09E+08 | 956  | 836  | 109400000 | 0.121136 | 0.043108734 |
| chr6 | 1.09E+08 | 1.1E+08  | 886  | 745  | 109450000 | 0.177695 | 0.006014269 |
| chr6 | 1.1E+08  | 1.1E+08  | 938  | 823  | 109550000 | 0.116324 | 0.04969721  |
| chr6 | 1.1E+08  | 1.1E+08  | 972  | 838  | 110100000 | 0.141634 | 0.022503272 |
| chr6 | 1.1E+08  | 1.1E+08  | 987  | 820  | 110150000 | 0.195054 | 0.002939382 |
| chr6 | 1.11E+08 | 1.11E+08 | 971  | 852  | 110600000 | 0.116246 | 0.049809757 |
| chr6 | 1.11E+08 | 1.11E+08 | 877  | 758  | 111100000 | 0.138007 | 0.025379205 |
| chr6 | 1.11E+08 | 1.11E+08 | 890  | 753  | 111150000 | 0.168784 | 0.008509735 |
| chr6 | 1.11E+08 | 1.11E+08 | 767  | 669  | 111200000 | 0.124849 | 0.038525109 |
| chr6 | 1.11E+08 | 1.12E+08 | 927  | 765  | 111450000 | 0.204738 | 0.001927047 |
| chr6 | 1.11E+08 | 1.12E+08 | 897  | 782  | 111500000 | 0.125568 | 0.037685231 |
| chr6 | 1.12E+08 | 1.12E+08 | 1026 | 897  | 111700000 | 0.121479 | 0.042667323 |
| chr6 | 1.12E+08 | 1.12E+08 | 1082 | 883  | 111750000 | 0.220843 | 0.000920823 |

|      |          |          |      |      |           |          |             |
|------|----------|----------|------|------|-----------|----------|-------------|
| chr6 | 1.12E+08 | 1.12E+08 | 1043 | 844  | 111800000 | 0.233052 | 0.000510466 |
| chr6 | 1.13E+08 | 1.13E+08 | 930  | 972  | 112700000 | -0.1361  | 0.026731384 |
| chr6 | 1.13E+08 | 1.13E+08 | 973  | 802  | 112950000 | 0.206466 | 0.00178412  |
| chr6 | 1.13E+08 | 1.13E+08 | 955  | 781  | 1.13E+08  | 0.217806 | 0.001062077 |
| chr6 | 1.13E+08 | 1.13E+08 | 1002 | 878  | 113050000 | 0.118218 | 0.047013528 |
| chr6 | 1.13E+08 | 1.13E+08 | 1018 | 847  | 113200000 | 0.192932 | 0.00321734  |
| chr6 | 1.13E+08 | 1.13E+08 | 1020 | 886  | 113350000 | 0.130819 | 0.03199609  |
| chr6 | 1.13E+08 | 1.13E+08 | 1005 | 858  | 113400000 | 0.155774 | 0.013778774 |
| chr6 | 1.13E+08 | 1.14E+08 | 1022 | 890  | 113450000 | 0.127146 | 0.035893862 |
| chr6 | 1.14E+08 | 1.14E+08 | 963  | 839  | 113600000 | 0.126493 | 0.036626173 |
| chr6 | 1.14E+08 | 1.14E+08 | 929  | 794  | 114050000 | 0.154168 | 0.014593805 |
| chr6 | 1.14E+08 | 1.14E+08 | 982  | 772  | 114100000 | 0.27475  | 5.60E-05    |
| chr6 | 1.14E+08 | 1.14E+08 | 1000 | 804  | 114150000 | 0.242361 | 0.000319938 |
| chr6 | 1.14E+08 | 1.14E+08 | 1039 | 888  | 114200000 | 0.154192 | 0.014581077 |
| chr6 | 1.14E+08 | 1.15E+08 | 1085 | 947  | 114450000 | 0.123887 | 0.03967229  |
| chr6 | 1.15E+08 | 1.15E+08 | 990  | 865  | 115100000 | 0.122357 | 0.0415552   |
| chr6 | 1.15E+08 | 1.15E+08 | 852  | 729  | 115250000 | 0.152563 | 0.015449382 |
| chr6 | 1.15E+08 | 1.15E+08 | 870  | 713  | 115300000 | 0.214742 | 0.001224607 |
| chr6 | 1.15E+08 | 1.15E+08 | 903  | 784  | 115350000 | 0.131501 | 0.031312581 |
| chr6 | 1.16E+08 | 1.16E+08 | 947  | 801  | 115750000 | 0.16919  | 0.008378514 |
| chr6 | 1.16E+08 | 1.16E+08 | 940  | 807  | 115800000 | 0.14772  | 0.018297482 |
| chr6 | 1.17E+08 | 1.17E+08 | 1042 | 905  | 116750000 | 0.130994 | 0.031819446 |
| chr6 | 1.18E+08 | 1.19E+08 | 1096 | 939  | 118450000 | 0.150679 | 0.01650845  |
| chr6 | 1.18E+08 | 1.19E+08 | 1097 | 933  | 118500000 | 0.161243 | 0.011292455 |
| chr6 | 1.19E+08 | 1.19E+08 | 1001 | 1035 | 118600000 | -0.12056 | 0.043526306 |
| chr6 | 1.19E+08 | 1.19E+08 | 972  | 850  | 119300000 | 0.121122 | 0.043127083 |
| chr6 | 1.19E+08 | 1.2E+08  | 1041 | 887  | 119500000 | 0.158592 | 0.012443894 |
| chr6 | 1.2E+08  | 1.2E+08  | 1100 | 962  | 119550000 | 0.121023 | 0.04325483  |
| chr6 | 1.2E+08  | 1.2E+08  | 1021 | 891  | 119650000 | 0.124114 | 0.039399232 |
| chr6 | 1.2E+08  | 1.2E+08  | 1066 | 933  | 119800000 | 0.119887 | 0.044746965 |
| chr6 | 1.2E+08  | 1.2E+08  | 1055 | 889  | 119850000 | 0.174616 | 0.006791082 |
| chr6 | 1.2E+08  | 1.2E+08  | 1052 | 865  | 120050000 | 0.209991 | 0.00152211  |
| chr6 | 1.2E+08  | 1.2E+08  | 1052 | 894  | 120100000 | 0.162416 | 0.010813106 |
| chr6 | 1.2E+08  | 1.2E+08  | 1079 | 916  | 120300000 | 0.163904 | 0.010231114 |
| chr6 | 1.2E+08  | 1.2E+08  | 1052 | 877  | 120350000 | 0.190114 | 0.003622963 |
| chr6 | 1.2E+08  | 1.2E+08  | 1036 | 871  | 120400000 | 0.177908 | 0.005963544 |
| chr6 | 1.2E+08  | 1.21E+08 | 1030 | 835  | 120450000 | 0.230424 | 0.000580855 |
| chr6 | 1.2E+08  | 1.21E+08 | 995  | 849  | 120500000 | 0.15656  | 0.013394527 |
| chr6 | 1.21E+08 | 1.21E+08 | 958  | 820  | 120550000 | 0.15203  | 0.01574284  |
| chr6 | 1.21E+08 | 1.21E+08 | 897  | 767  | 120600000 | 0.15351  | 0.014939588 |
| chr6 | 1.21E+08 | 1.21E+08 | 930  | 763  | 120750000 | 0.213176 | 0.001316174 |
| chr6 | 1.21E+08 | 1.21E+08 | 1007 | 871  | 121300000 | 0.136947 | 0.02627582  |
| chr6 | 1.21E+08 | 1.21E+08 | 962  | 834  | 121350000 | 0.133618 | 0.029266881 |
| chr6 | 1.21E+08 | 1.22E+08 | 876  | 761  | 121450000 | 0.130663 | 0.032154345 |
| chr6 | 1.21E+08 | 1.22E+08 | 870  | 746  | 121500000 | 0.149468 | 0.017221666 |
| chr6 | 1.22E+08 | 1.22E+08 | 855  | 725  | 121600000 | 0.165572 | 0.009611213 |
| chr6 | 1.22E+08 | 1.22E+08 | 885  | 749  | 121650000 | 0.16834  | 0.008654963 |

|      |          |          |      |     |           |          |             |
|------|----------|----------|------|-----|-----------|----------|-------------|
| chr6 | 1.22E+08 | 1.22E+08 | 970  | 849 | 122050000 | 0.119848 | 0.044797921 |
| chr6 | 1.22E+08 | 1.22E+08 | 1028 | 888 | 122100000 | 0.138837 | 0.024695432 |
| chr6 | 1.22E+08 | 1.22E+08 | 1052 | 906 | 122250000 | 0.14318  | 0.021364265 |
| chr6 | 1.23E+08 | 1.23E+08 | 1032 | 862 | 122800000 | 0.187311 | 0.00407155  |
| chr6 | 1.23E+08 | 1.23E+08 | 984  | 770 | 122850000 | 0.281428 | 3.82E-05    |
| chr6 | 1.23E+08 | 1.23E+08 | 922  | 708 | 122900000 | 0.308646 | 7.46E-06    |
| chr6 | 1.23E+08 | 1.23E+08 | 989  | 832 | 122950000 | 0.177015 | 0.006178527 |
| chr6 | 1.23E+08 | 1.23E+08 | 959  | 817 | 123100000 | 0.158823 | 0.012339779 |
| chr6 | 1.23E+08 | 1.23E+08 | 934  | 819 | 123150000 | 0.117187 | 0.048458804 |
| chr6 | 1.23E+08 | 1.23E+08 | 892  | 775 | 123200000 | 0.130476 | 0.032344758 |
| chr6 | 1.23E+08 | 1.23E+08 | 908  | 786 | 123250000 | 0.135791 | 0.027283913 |
| chr6 | 1.23E+08 | 1.24E+08 | 991  | 849 | 123500000 | 0.150749 | 0.016468143 |
| chr6 | 1.24E+08 | 1.24E+08 | 1079 | 898 | 123650000 | 0.192536 | 0.003271777 |
| chr6 | 1.24E+08 | 1.24E+08 | 1012 | 862 | 123850000 | 0.159078 | 0.012225666 |
| chr6 | 1.24E+08 | 1.24E+08 | 992  | 854 | 123900000 | 0.143732 | 0.020969316 |
| chr6 | 1.24E+08 | 1.24E+08 | 1052 | 880 | 124350000 | 0.185188 | 0.004444063 |
| chr6 | 1.24E+08 | 1.24E+08 | 1110 | 879 | 124400000 | 0.264253 | 0.000100502 |
| chr6 | 1.25E+08 | 1.25E+08 | 1032 | 895 | 124550000 | 0.133112 | 0.029745502 |
| chr6 | 1.25E+08 | 1.25E+08 | 963  | 826 | 124650000 | 0.149022 | 0.017490772 |
| chr6 | 1.25E+08 | 1.25E+08 | 952  | 761 | 124700000 | 0.250693 | 0.000207921 |
| chr6 | 1.25E+08 | 1.25E+08 | 1023 | 885 | 124750000 | 0.136685 | 0.026501739 |
| chr6 | 1.25E+08 | 1.25E+08 | 960  | 833 | 125050000 | 0.132346 | 0.030481745 |
| chr6 | 1.25E+08 | 1.25E+08 | 990  | 843 | 125100000 | 0.159524 | 0.01202795  |
| chr6 | 1.26E+08 | 1.26E+08 | 1074 | 927 | 125800000 | 0.139981 | 0.023778066 |
| chr6 | 1.26E+08 | 1.26E+08 | 1062 | 904 | 125850000 | 0.160017 | 0.011812738 |
| chr6 | 1.26E+08 | 1.26E+08 | 1006 | 874 | 126100000 | 0.130553 | 0.032265513 |
| chr6 | 1.26E+08 | 1.26E+08 | 1035 | 874 | 126350000 | 0.171554 | 0.007650693 |
| chr6 | 1.26E+08 | 1.27E+08 | 995  | 873 | 126500000 | 0.116343 | 0.049669144 |
| chr6 | 1.27E+08 | 1.27E+08 | 992  | 860 | 126600000 | 0.133632 | 0.02925378  |
| chr6 | 1.27E+08 | 1.27E+08 | 1014 | 879 | 126650000 | 0.133751 | 0.029142113 |
| chr6 | 1.27E+08 | 1.27E+08 | 1040 | 859 | 126750000 | 0.203482 | 0.002037413 |
| chr6 | 1.27E+08 | 1.27E+08 | 980  | 836 | 126800000 | 0.156907 | 0.013227952 |
| chr6 | 1.27E+08 | 1.27E+08 | 983  | 845 | 127150000 | 0.145868 | 0.019499716 |
| chr6 | 1.28E+08 | 1.28E+08 | 1024 | 885 | 128300000 | 0.138095 | 0.025306466 |
| chr6 | 1.28E+08 | 1.28E+08 | 1083 | 921 | 128350000 | 0.161388 | 0.011231969 |
| chr6 | 1.28E+08 | 1.29E+08 | 1047 | 881 | 128450000 | 0.176676 | 0.006262101 |
| chr6 | 1.28E+08 | 1.29E+08 | 1005 | 823 | 128500000 | 0.215859 | 0.001162851 |
| chr6 | 1.29E+08 | 1.29E+08 | 1000 | 865 | 128550000 | 0.136856 | 0.026354106 |
| chr6 | 1.29E+08 | 1.29E+08 | 904  | 771 | 129200000 | 0.15722  | 0.013079121 |
| chr6 | 1.29E+08 | 1.29E+08 | 938  | 820 | 129350000 | 0.121592 | 0.042522557 |
| chr6 | 1.29E+08 | 1.29E+08 | 1022 | 882 | 129400000 | 0.140173 | 0.023627054 |
| chr6 | 1.29E+08 | 1.3E+08  | 987  | 855 | 129450000 | 0.134754 | 0.02821582  |
| chr6 | 1.29E+08 | 1.3E+08  | 942  | 826 | 129500000 | 0.117214 | 0.048421652 |
| chr6 | 1.3E+08  | 1.3E+08  | 1071 | 928 | 129750000 | 0.13439  | 0.028548973 |
| chr6 | 1.3E+08  | 1.3E+08  | 1028 | 899 | 129800000 | 0.121075 | 0.04318685  |
| chr6 | 1.3E+08  | 1.3E+08  | 1060 | 892 | 130400000 | 0.176577 | 0.006286629 |
| chr6 | 1.3E+08  | 1.31E+08 | 1013 | 851 | 130450000 | 0.179031 | 0.005702304 |

|      |          |          |      |      |           |          |             |
|------|----------|----------|------|------|-----------|----------|-------------|
| chr6 | 1.31E+08 | 1.31E+08 | 1085 | 939  | 130750000 | 0.136126 | 0.02698852  |
| chr6 | 1.31E+08 | 1.31E+08 | 1016 | 886  | 130800000 | 0.12515  | 0.038171161 |
| chr6 | 1.31E+08 | 1.31E+08 | 1013 | 883  | 130900000 | 0.125777 | 0.037443409 |
| chr6 | 1.31E+08 | 1.31E+08 | 1020 | 895  | 1.31E+08  | 0.116238 | 0.049821803 |
| chr6 | 1.31E+08 | 1.31E+08 | 1075 | 932  | 131350000 | 0.133563 | 0.029318307 |
| chr6 | 1.31E+08 | 1.31E+08 | 971  | 790  | 131400000 | 0.225247 | 0.000746566 |
| chr6 | 1.31E+08 | 1.32E+08 | 957  | 798  | 131450000 | 0.189758 | 0.003677326 |
| chr6 | 1.32E+08 | 1.32E+08 | 915  | 777  | 131650000 | 0.163485 | 0.010391918 |
| chr6 | 1.32E+08 | 1.32E+08 | 1070 | 905  | 132300000 | 0.169249 | 0.008359653 |
| chr6 | 1.33E+08 | 1.33E+08 | 1037 | 905  | 133250000 | 0.124054 | 0.039470512 |
| chr6 | 1.33E+08 | 1.34E+08 | 895  | 760  | 133450000 | 0.163516 | 0.010379878 |
| chr6 | 1.34E+08 | 1.34E+08 | 1082 | 937  | 133650000 | 0.135208 | 0.02780484  |
| chr6 | 1.35E+08 | 1.35E+08 | 873  | 757  | 134550000 | 0.133317 | 0.029550891 |
| chr6 | 1.35E+08 | 1.35E+08 | 1023 | 872  | 134750000 | 0.158034 | 0.012698887 |
| chr6 | 1.35E+08 | 1.35E+08 | 1021 | 839  | 134800000 | 0.210868 | 0.001462613 |
| chr6 | 1.35E+08 | 1.35E+08 | 996  | 800  | 134850000 | 0.243774 | 0.00029764  |
| chr6 | 1.35E+08 | 1.35E+08 | 979  | 848  | 134900000 | 0.134873 | 0.028107643 |
| chr6 | 1.35E+08 | 1.35E+08 | 1027 | 886  | 134950000 | 0.140686 | 0.023227343 |
| chr6 | 1.35E+08 | 1.35E+08 | 1063 | 862  | 1.35E+08  | 0.23001  | 0.000592743 |
| chr6 | 1.35E+08 | 1.35E+08 | 1024 | 849  | 135050000 | 0.198007 | 0.002588753 |
| chr6 | 1.35E+08 | 1.35E+08 | 904  | 938  | 135150000 | -0.12564 | 0.03728822  |
| chr6 | 1.36E+08 | 1.36E+08 | 1013 | 876  | 135550000 | 0.13726  | 0.026008886 |
| chr6 | 1.36E+08 | 1.36E+08 | 1082 | 924  | 135650000 | 0.155364 | 0.013983066 |
| chr6 | 1.36E+08 | 1.36E+08 | 1060 | 899  | 135700000 | 0.165299 | 0.009710058 |
| chr6 | 1.36E+08 | 1.36E+08 | 1079 | 919  | 135750000 | 0.159186 | 0.012177313 |
| chr6 | 1.37E+08 | 1.37E+08 | 1036 | 908  | 136700000 | 0.117888 | 0.047472308 |
| chr6 | 1.37E+08 | 1.37E+08 | 988  | 853  | 136850000 | 0.139594 | 0.024085467 |
| chr6 | 1.37E+08 | 1.37E+08 | 1033 | 894  | 1.37E+08  | 0.136122 | 0.026992437 |
| chr6 | 1.37E+08 | 1.37E+08 | 993  | 859  | 137050000 | 0.136764 | 0.02643369  |
| chr6 | 1.37E+08 | 1.37E+08 | 959  | 833  | 137100000 | 0.130843 | 0.031972052 |
| chr6 | 1.37E+08 | 1.37E+08 | 911  | 745  | 137150000 | 0.217839 | 0.001060468 |
| chr6 | 1.37E+08 | 1.37E+08 | 987  | 820  | 137200000 | 0.195054 | 0.002939382 |
| chr6 | 1.38E+08 | 1.38E+08 | 1058 | 901  | 138050000 | 0.159369 | 0.01209641  |
| chr6 | 1.38E+08 | 1.38E+08 | 1022 | 886  | 138200000 | 0.133645 | 0.029241453 |
| chr6 | 1.39E+08 | 1.39E+08 | 872  | 917  | 138650000 | -0.14497 | 0.019860269 |
| chr6 | 1.39E+08 | 1.39E+08 | 919  | 958  | 138700000 | -0.13233 | 0.030199385 |
| chr6 | 1.39E+08 | 1.39E+08 | 950  | 1001 | 138750000 | -0.14781 | 0.017999482 |
| chr6 | 1.39E+08 | 1.39E+08 | 820  | 860  | 139050000 | -0.14108 | 0.02265636  |
| chr6 | 1.39E+08 | 1.39E+08 | 815  | 865  | 139150000 | -0.15827 | 0.012391166 |
| chr6 | 1.39E+08 | 1.39E+08 | 1035 | 867  | 139250000 | 0.183155 | 0.004828835 |
| chr6 | 1.4E+08  | 1.4E+08  | 1013 | 833  | 139800000 | 0.209874 | 0.001530201 |
| chr6 | 1.4E+08  | 1.4E+08  | 950  | 832  | 139850000 | 0.118972 | 0.045977811 |
| chr6 | 1.4E+08  | 1.4E+08  | 1091 | 944  | 140100000 | 0.136421 | 0.026731177 |
| chr6 | 1.4E+08  | 1.4E+08  | 1058 | 921  | 140150000 | 0.127695 | 0.035287935 |
| chr6 | 1.4E+08  | 1.4E+08  | 1015 | 886  | 140400000 | 0.123729 | 0.039862913 |
| chr6 | 1.4E+08  | 1.41E+08 | 968  | 827  | 140450000 | 0.154748 | 0.014294781 |
| chr6 | 1.41E+08 | 1.41E+08 | 993  | 858  | 140600000 | 0.138444 | 0.025017039 |

|      |          |          |      |     |           |          |             |
|------|----------|----------|------|-----|-----------|----------|-------------|
| chr6 | 1.41E+08 | 1.41E+08 | 1062 | 884 | 140650000 | 0.192294 | 0.00330544  |
| chr6 | 1.41E+08 | 1.41E+08 | 1101 | 879 | 140800000 | 0.252508 | 0.000188996 |
| chr6 | 1.41E+08 | 1.41E+08 | 1098 | 939 | 140850000 | 0.153309 | 0.015046273 |
| chr6 | 1.41E+08 | 1.41E+08 | 992  | 854 | 140950000 | 0.143732 | 0.020969316 |
| chr6 | 1.41E+08 | 1.41E+08 | 899  | 729 | 1.41E+08  | 0.230031 | 0.00059215  |
| chr6 | 1.41E+08 | 1.41E+08 | 936  | 734 | 141050000 | 0.278357 | 4.56E-05    |
| chr6 | 1.41E+08 | 1.41E+08 | 1031 | 876 | 141100000 | 0.16267  | 0.010711881 |
| chr6 | 1.41E+08 | 1.41E+08 | 1016 | 859 | 141200000 | 0.169799 | 0.008185616 |
| chr6 | 1.41E+08 | 1.41E+08 | 1078 | 864 | 141250000 | 0.246882 | 0.000253602 |
| chr6 | 1.42E+08 | 1.42E+08 | 965  | 842 | 141550000 | 0.124337 | 0.039132053 |
| chr6 | 1.42E+08 | 1.42E+08 | 1039 | 875 | 141700000 | 0.175469 | 0.006567385 |
| chr6 | 1.42E+08 | 1.42E+08 | 989  | 858 | 141750000 | 0.132621 | 0.030215556 |
| chr6 | 1.42E+08 | 1.42E+08 | 968  | 825 | 141800000 | 0.158241 | 0.012603842 |
| chr6 | 1.42E+08 | 1.42E+08 | 1003 | 858 | 141900000 | 0.1529   | 0.015265998 |
| chr6 | 1.42E+08 | 1.42E+08 | 1005 | 830 | 141950000 | 0.20364  | 0.002023152 |
| chr6 | 1.42E+08 | 1.42E+08 | 994  | 840 | 1.42E+08  | 0.170485 | 0.007972696 |
| chr6 | 1.42E+08 | 1.42E+08 | 1001 | 807 | 142050000 | 0.23843  | 0.00039044  |
| chr6 | 1.42E+08 | 1.42E+08 | 978  | 841 | 142350000 | 0.145357 | 0.019843332 |
| chr6 | 1.42E+08 | 1.42E+08 | 1018 | 804 | 142400000 | 0.268098 | 8.13E-05    |
| chr6 | 1.42E+08 | 1.43E+08 | 1020 | 810 | 142450000 | 0.260204 | 0.000125286 |
| chr6 | 1.42E+08 | 1.43E+08 | 1014 | 876 | 142500000 | 0.138683 | 0.024821004 |
| chr6 | 1.44E+08 | 1.44E+08 | 1018 | 892 | 143600000 | 0.11825  | 0.046968821 |
| chr6 | 1.45E+08 | 1.45E+08 | 1016 | 890 | 144550000 | 0.118651 | 0.046416046 |
| chr6 | 1.45E+08 | 1.45E+08 | 1055 | 904 | 144650000 | 0.150477 | 0.016625868 |
| chr6 | 1.45E+08 | 1.45E+08 | 1052 | 892 | 144700000 | 0.165647 | 0.009583893 |
| chr6 | 1.46E+08 | 1.46E+08 | 1111 | 972 | 145700000 | 0.120459 | 0.043990513 |
| chr6 | 1.46E+08 | 1.46E+08 | 884  | 750 | 1.46E+08  | 0.164784 | 0.009899699 |
| chr6 | 1.47E+08 | 1.47E+08 | 1052 | 922 | 146550000 | 0.117924 | 0.047421718 |
| chr6 | 1.47E+08 | 1.47E+08 | 965  | 826 | 146600000 | 0.152015 | 0.01575094  |
| chr6 | 1.47E+08 | 1.47E+08 | 931  | 810 | 147100000 | 0.128487 | 0.034427321 |
| chr6 | 1.47E+08 | 1.47E+08 | 1044 | 901 | 147250000 | 0.140151 | 0.023644275 |
| chr6 | 1.47E+08 | 1.48E+08 | 1098 | 952 | 147500000 | 0.133473 | 0.029403279 |
| chr6 | 1.48E+08 | 1.48E+08 | 1056 | 842 | 147550000 | 0.254346 | 0.000171477 |
| chr6 | 1.48E+08 | 1.48E+08 | 1044 | 844 | 147600000 | 0.234435 | 0.000476698 |
| chr6 | 1.48E+08 | 1.48E+08 | 1049 | 902 | 147650000 | 0.145444 | 0.019784735 |
| chr6 | 1.49E+08 | 1.49E+08 | 1033 | 884 | 149050000 | 0.15235  | 0.015565914 |
| chr6 | 1.5E+08  | 1.5E+08  | 905  | 950 | 150200000 | -0.14238 | 0.021687021 |
| chr6 | 1.5E+08  | 1.5E+08  | 772  | 836 | 150250000 | -0.18727 | 0.003975662 |
| chr6 | 1.51E+08 | 1.52E+08 | 897  | 778 | 151450000 | 0.132966 | 0.029884346 |
| chr6 | 1.52E+08 | 1.52E+08 | 1011 | 845 | 151900000 | 0.186388 | 0.004229922 |
| chr6 | 1.52E+08 | 1.52E+08 | 1004 | 865 | 151950000 | 0.142615 | 0.021774454 |
| chr6 | 1.52E+08 | 1.52E+08 | 991  | 860 | 152250000 | 0.132177 | 0.030646817 |
| chr6 | 1.53E+08 | 1.53E+08 | 977  | 836 | 153300000 | 0.152484 | 0.015492586 |
| chr6 | 1.53E+08 | 1.53E+08 | 1045 | 906 | 153400000 | 0.133548 | 0.029332243 |
| chr6 | 1.54E+08 | 1.54E+08 | 1099 | 948 | 153600000 | 0.140861 | 0.023092408 |
| chr6 | 1.54E+08 | 1.54E+08 | 1064 | 879 | 153650000 | 0.203191 | 0.002063735 |
| chr6 | 1.54E+08 | 1.54E+08 | 926  | 804 | 153800000 | 0.131445 | 0.031367905 |

|      |          |          |      |      |           |          |             |
|------|----------|----------|------|------|-----------|----------|-------------|
| chr6 | 1.54E+08 | 1.54E+08 | 988  | 846  | 153950000 | 0.151482 | 0.016049831 |
| chr6 | 1.54E+08 | 1.54E+08 | 971  | 806  | 1.54E+08  | 0.19632  | 0.002784202 |
| chr6 | 1.54E+08 | 1.54E+08 | 999  | 856  | 154050000 | 0.150502 | 0.016611002 |
| chr6 | 1.54E+08 | 1.54E+08 | 939  | 996  | 154150000 | -0.15739 | 0.012795925 |
| chr6 | 1.54E+08 | 1.54E+08 | 1025 | 875  | 154400000 | 0.155897 | 0.013718004 |
| chr6 | 1.54E+08 | 1.55E+08 | 957  | 825  | 154450000 | 0.141753 | 0.02241399  |
| chr6 | 1.55E+08 | 1.55E+08 | 983  | 838  | 155100000 | 0.157869 | 0.012775127 |
| chr6 | 1.55E+08 | 1.55E+08 | 999  | 845  | 155150000 | 0.169162 | 0.008387761 |
| chr6 | 1.56E+08 | 1.56E+08 | 1076 | 941  | 1.56E+08  | 0.12104  | 0.043233171 |
| chr6 | 1.56E+08 | 1.56E+08 | 1005 | 864  | 156100000 | 0.145721 | 0.019598492 |
| chr6 | 1.56E+08 | 1.56E+08 | 1069 | 871  | 156150000 | 0.223145 | 0.000825523 |
| chr6 | 1.57E+08 | 1.57E+08 | 937  | 968  | 156800000 | -0.11933 | 0.045159512 |
| chr6 | 1.57E+08 | 1.57E+08 | 1098 | 949  | 157150000 | 0.138026 | 0.025363314 |
| chr6 | 1.58E+08 | 1.58E+08 | 634  | 676  | 157550000 | -0.16491 | 0.009678257 |
| chr6 | 1.58E+08 | 1.58E+08 | 424  | 452  | 157600000 | -0.16463 | 0.009781869 |
| chr6 | 1.58E+08 | 1.58E+08 | 426  | 457  | 157650000 | -0.17371 | 0.006891983 |
| chr6 | 1.58E+08 | 1.58E+08 | 583  | 658  | 157700000 | -0.24696 | 0.000238931 |
| chr6 | 1.58E+08 | 1.58E+08 | 1025 | 891  | 158300000 | 0.129755 | 0.03308743  |
| chr6 | 1.58E+08 | 1.58E+08 | 1013 | 888  | 158350000 | 0.117631 | 0.04783253  |
| chr6 | 1.59E+08 | 1.59E+08 | 1026 | 881  | 158900000 | 0.147445 | 0.018472066 |
| chr6 | 1.59E+08 | 1.59E+08 | 1055 | 917  | 158950000 | 0.129878 | 0.032959935 |
| chr6 | 1.59E+08 | 1.6E+08  | 1061 | 925  | 159450000 | 0.125528 | 0.037731549 |
| chr6 | 1.61E+08 | 1.61E+08 | 940  | 977  | 160750000 | -0.12807 | 0.034569412 |
| chr6 | 1.61E+08 | 1.61E+08 | 777  | 819  | 160950000 | -0.14832 | 0.017684891 |
| chr6 | 1.61E+08 | 1.61E+08 | 662  | 737  | 1.61E+08  | -0.22721 | 0.00065026  |
| chr6 | 1.61E+08 | 1.61E+08 | 602  | 681  | 161050000 | -0.25026 | 0.000200777 |
| chr6 | 1.62E+08 | 1.62E+08 | 1067 | 935  | 161900000 | 0.11815  | 0.047107474 |
| chr6 | 1.62E+08 | 1.62E+08 | 959  | 1018 | 162200000 | -0.15851 | 0.012285019 |
| chr6 | 1.62E+08 | 1.62E+08 | 940  | 986  | 162250000 | -0.1413  | 0.022493836 |
| chr6 | 1.62E+08 | 1.63E+08 | 1047 | 888  | 162450000 | 0.165258 | 0.009725164 |
| chr6 | 1.62E+08 | 1.63E+08 | 1066 | 924  | 162500000 | 0.133871 | 0.029029888 |
| chr6 | 1.63E+08 | 1.63E+08 | 1007 | 875  | 1.63E+08  | 0.130337 | 0.032486516 |
| chr6 | 1.63E+08 | 1.63E+08 | 1022 | 889  | 163050000 | 0.128768 | 0.034126844 |
| chr6 | 1.63E+08 | 1.63E+08 | 1021 | 870  | 163100000 | 0.158524 | 0.012474958 |
| chr6 | 1.64E+08 | 1.64E+08 | 1071 | 1106 | 164150000 | -0.11876 | 0.045925744 |
| chr6 | 1.64E+08 | 1.64E+08 | 1016 | 1077 | 164200000 | -0.15649 | 0.013223257 |
| chr6 | 1.64E+08 | 1.64E+08 | 1015 | 1088 | 164250000 | -0.17257 | 0.007207995 |
| chr6 | 1.64E+08 | 1.65E+08 | 952  | 1032 | 164500000 | -0.18878 | 0.003732262 |
| chr6 | 1.65E+08 | 1.65E+08 | 981  | 1018 | 164550000 | -0.12578 | 0.037118676 |
| chr6 | 1.65E+08 | 1.65E+08 | 1039 | 884  | 164700000 | 0.160706 | 0.011518001 |
| chr6 | 1.65E+08 | 1.65E+08 | 994  | 850  | 164800000 | 0.153411 | 0.014991885 |
| chr6 | 1.65E+08 | 1.65E+08 | 999  | 844  | 164850000 | 0.17087  | 0.007855334 |
| chr6 | 1.65E+08 | 1.65E+08 | 973  | 840  | 164950000 | 0.139679 | 0.024017602 |
| chr6 | 1.65E+08 | 1.65E+08 | 987  | 792  | 1.65E+08  | 0.245178 | 0.000276931 |
| chr6 | 1.65E+08 | 1.65E+08 | 1014 | 819  | 165050000 | 0.235751 | 0.000446507 |
| chr6 | 1.65E+08 | 1.65E+08 | 904  | 790  | 165100000 | 0.122098 | 0.041880034 |
| chr6 | 1.65E+08 | 1.65E+08 | 1041 | 905  | 165250000 | 0.129609 | 0.03323977  |



|       |          |          |      |      |           |          |             |
|-------|----------|----------|------|------|-----------|----------|-------------|
| chr6  | 1.66E+08 | 1.66E+08 | 1007 | 873  | 165850000 | 0.133638 | 0.029247524 |
| chr6  | 1.67E+08 | 1.67E+08 | 900  | 956  | 166550000 | -0.15946 | 0.011863175 |
| chr6  | 1.67E+08 | 1.67E+08 | 1062 | 1130 | 167050000 | -0.16191 | 0.010832353 |
| chr6  | 1.67E+08 | 1.67E+08 | 996  | 1146 | 167100000 | -0.27476 | 5.19E-05    |
| chr6  | 1.67E+08 | 1.67E+08 | 1003 | 1080 | 167150000 | -0.17908 | 0.005564805 |
| chr6  | 1.67E+08 | 1.67E+08 | 922  | 992  | 167300000 | -0.17795 | 0.00582501  |
| chr6  | 1.67E+08 | 1.67E+08 | 860  | 972  | 167350000 | -0.24899 | 0.00021475  |
| chr6  | 1.67E+08 | 1.68E+08 | 908  | 959  | 167500000 | -0.15121 | 0.015977984 |
| chr6  | 1.68E+08 | 1.68E+08 | 835  | 928  | 167550000 | -0.22472 | 0.000733884 |
| chr6  | 1.68E+08 | 1.68E+08 | 628  | 700  | 167600000 | -0.22896 | 0.000596551 |
| chr6  | 1.68E+08 | 1.68E+08 | 689  | 787  | 167800000 | -0.26423 | 9.41E-05    |
| chr6  | 1.68E+08 | 1.68E+08 | 941  | 1020 | 167850000 | -0.18867 | 0.003749082 |
| chr6  | 1.68E+08 | 1.68E+08 | 972  | 1033 | 167900000 | -0.16018 | 0.011549419 |
| chr6  | 1.68E+08 | 1.68E+08 | 452  | 518  | 167950000 | -0.269   | 7.21E-05    |
| chr6  | 1.68E+08 | 1.68E+08 | 65   | 92   | 1.68E+08  | -0.57357 | 1.13E-15    |
| chr6  | 1.68E+08 | 1.68E+08 | 613  | 676  | 168050000 | -0.21351 | 0.001249548 |
| chr6  | 1.68E+08 | 1.68E+08 | 1046 | 1101 | 168100000 | -0.1463  | 0.018966897 |
| chr6  | 1.68E+08 | 1.68E+08 | 974  | 1056 | 168150000 | -0.18899 | 0.003699958 |
| chr6  | 1.68E+08 | 1.68E+08 | 969  | 1046 | 168200000 | -0.18269 | 0.004806548 |
| chr6  | 1.68E+08 | 1.68E+08 | 1008 | 1042 | 168350000 | -0.12023 | 0.043958326 |
| chr6  | 1.68E+08 | 1.68E+08 | 998  | 1115 | 168400000 | -0.2323  | 0.000505568 |
| chr6  | 1.68E+08 | 1.69E+08 | 1097 | 1163 | 168450000 | -0.15666 | 0.013141984 |
| chr6  | 1.68E+08 | 1.69E+08 | 1119 | 1167 | 168500000 | -0.13297 | 0.029590724 |
| chr6  | 1.69E+08 | 1.69E+08 | 1016 | 1083 | 168700000 | -0.1645  | 0.00982837  |
| chr6  | 1.69E+08 | 1.69E+08 | 989  | 1120 | 168750000 | -0.25183 | 0.000184749 |
| chr6  | 1.69E+08 | 1.69E+08 | 1014 | 1165 | 168800000 | -0.27264 | 5.86E-05    |
| chr6  | 1.69E+08 | 1.69E+08 | 1078 | 1174 | 168850000 | -0.19545 | 0.002808879 |
| chr6  | 1.69E+08 | 1.69E+08 | 1044 | 1100 | 168900000 | -0.14775 | 0.018037545 |
| chr6  | 1.69E+08 | 1.69E+08 | 940  | 992  | 168950000 | -0.15005 | 0.016644891 |
| chr6  | 1.69E+08 | 1.69E+08 | 971  | 1051 | 169100000 | -0.18659 | 0.004090502 |
| chr6  | 1.69E+08 | 1.69E+08 | 970  | 1035 | 169150000 | -0.16595 | 0.009306497 |
| chr6  | 1.69E+08 | 1.69E+08 | 971  | 1005 | 169200000 | -0.12202 | 0.041646844 |
| chr6  | 1.69E+08 | 1.69E+08 | 937  | 986  | 169400000 | -0.14591 | 0.019225684 |
| chr6  | 1.7E+08  | 1.7E+08  | 982  | 1033 | 169700000 | -0.14542 | 0.019554738 |
| chr6  | 1.7E+08  | 1.7E+08  | 863  | 1012 | 169750000 | -0.30215 | 1.01E-05    |
| chr6  | 1.7E+08  | 1.7E+08  | 888  | 992  | 169800000 | -0.23215 | 0.000509399 |
| chr6  | 1.7E+08  | 1.7E+08  | 1045 | 1140 | 170200000 | -0.1979  | 0.002524585 |
| chr6  | 1.7E+08  | 1.7E+08  | 814  | 959  | 170250000 | -0.30887 | 6.62E-06    |
| chr6  | 1.7E+08  | 1.7E+08  | 492  | 600  | 170300000 | -0.35868 | 2.28E-07    |
| chr6  | 1.7E+08  | 1.7E+08  | 740  | 769  | 170350000 | -0.12783 | 0.034829603 |
| chr6  | 1.7E+08  | 1.7E+08  | 1079 | 1115 | 170400000 | -0.11972 | 0.044635607 |
| chr6  | 1.7E+08  | 1.71E+08 | 1029 | 1129 | 170450000 | -0.20617 | 0.001748422 |
| chr6  | 1.7E+08  | 1.71E+08 | 1031 | 1087 | 170500000 | -0.14868 | 0.017464833 |
| chr6  | 1.71E+08 | 1.71E+08 | 1039 | 1117 | 170550000 | -0.17681 | 0.006096834 |
| chr6  | 1.71E+08 | 1.71E+08 | 975  | 1042 | 170600000 | -0.16825 | 0.008521666 |
| chr6  | 1.71E+08 | 1.71E+08 | 116  | 123  | 170950000 | -0.15691 | 0.013024982 |
| chr17 | 100001   | 200000   | 871  | 952  | 150000    | -0.20066 | 0.002236577 |

|       |         |         |      |      |          |          |             |
|-------|---------|---------|------|------|----------|----------|-------------|
| chr17 | 150001  | 250000  | 928  | 1028 | 2.00E+05 | -0.22002 | 0.000920031 |
| chr17 | 300001  | 400000  | 32   | 35   | 350000   | -0.20165 | 0.002140308 |
| chr17 | 500001  | 600000  | 844  | 731  | 550000   | 0.135    | 0.027992512 |
| chr17 | 850001  | 950000  | 882  | 1019 | 9.00E+05 | -0.28068 | 3.69E-05    |
| chr17 | 900001  | 1000000 | 914  | 1012 | 950000   | -0.21931 | 0.000951193 |
| chr17 | 1000001 | 1100000 | 876  | 911  | 1050000  | -0.12889 | 0.033688058 |
| chr17 | 1150001 | 1250000 | 772  | 803  | 1200000  | -0.12917 | 0.03339334  |
| chr17 | 1300001 | 1400000 | 820  | 864  | 1350000  | -0.14778 | 0.018021501 |
| chr17 | 1350001 | 1450000 | 935  | 968  | 1400000  | -0.12241 | 0.041159296 |
| chr17 | 1400001 | 1500000 | 890  | 977  | 1450000  | -0.20692 | 0.001690065 |
| chr17 | 1450001 | 1550000 | 885  | 966  | 1500000  | -0.19872 | 0.002436176 |
| chr17 | 1500001 | 1600000 | 852  | 914  | 1550000  | -0.17371 | 0.006891983 |
| chr17 | 1550001 | 1650000 | 824  | 923  | 1600000  | -0.23606 | 0.000418797 |
| chr17 | 1600001 | 1700000 | 804  | 871  | 1650000  | -0.18785 | 0.003881164 |
| chr17 | 1850001 | 1950000 | 915  | 990  | 1900000  | -0.18603 | 0.004187392 |
| chr17 | 1900001 | 2000000 | 964  | 1225 | 1950000  | -0.41805 | 2.38E-09    |
| chr17 | 1950001 | 2050000 | 930  | 1090 | 2.00E+06 | -0.3014  | 1.06E-05    |
| chr17 | 2100001 | 2200000 | 906  | 939  | 2150000  | -0.12399 | 0.03923138  |
| chr17 | 2200001 | 2300000 | 875  | 936  | 2250000  | -0.1696  | 0.008091694 |
| chr17 | 2250001 | 2350000 | 909  | 958  | 2300000  | -0.14812 | 0.017810762 |
| chr17 | 2300001 | 2400000 | 785  | 835  | 2350000  | -0.16146 | 0.011017593 |
| chr17 | 2350001 | 2450000 | 726  | 798  | 2400000  | -0.20879 | 0.001552636 |
| chr17 | 2400001 | 2500000 | 762  | 807  | 2450000  | -0.15515 | 0.013880438 |
| chr17 | 2450001 | 2550000 | 753  | 786  | 2500000  | -0.13425 | 0.028387928 |
| chr17 | 2500001 | 2600000 | 784  | 817  | 2550000  | -0.13185 | 0.030665691 |
| chr17 | 2550001 | 2650000 | 884  | 928  | 2600000  | -0.14245 | 0.021636659 |
| chr17 | 2600001 | 2700000 | 838  | 872  | 2650000  | -0.12975 | 0.032788673 |
| chr17 | 2650001 | 2750000 | 802  | 837  | 2700000  | -0.134   | 0.028622462 |
| chr17 | 2700001 | 2800000 | 843  | 931  | 2750000  | -0.21562 | 0.001132286 |
| chr17 | 2750001 | 2850000 | 902  | 947  | 2800000  | -0.14261 | 0.02152083  |
| chr17 | 2950001 | 3050000 | 608  | 656  | 3.00E+06 | -0.182   | 0.004944075 |
| chr17 | 3400001 | 3500000 | 921  | 961  | 3450000  | -0.13371 | 0.028892247 |
| chr17 | 3450001 | 3550000 | 908  | 941  | 3500000  | -0.12387 | 0.039365751 |
| chr17 | 3500001 | 3600000 | 900  | 971  | 3550000  | -0.18192 | 0.004959885 |
| chr17 | 3550001 | 3650000 | 892  | 928  | 3600000  | -0.12945 | 0.03309762  |
| chr17 | 3700001 | 3800000 | 947  | 1018 | 3750000  | -0.17667 | 0.006129103 |
| chr17 | 3750001 | 3850000 | 1036 | 1132 | 3800000  | -0.20022 | 0.002280316 |
| chr17 | 3800001 | 3900000 | 1033 | 1090 | 3850000  | -0.14986 | 0.016757326 |
| chr17 | 3850001 | 3950000 | 953  | 1008 | 3900000  | -0.15332 | 0.014823375 |
| chr17 | 4150001 | 4250000 | 979  | 855  | 4200000  | 0.123013 | 0.040739282 |
| chr17 | 4350001 | 4450000 | 1045 | 1102 | 4400000  | -0.14899 | 0.017274353 |
| chr17 | 4400001 | 4500000 | 1066 | 1196 | 4450000  | -0.23838 | 0.000372257 |
| chr17 | 4450001 | 4550000 | 937  | 1010 | 4500000  | -0.18061 | 0.005231961 |
| chr17 | 4600001 | 4700000 | 845  | 886  | 4650000  | -0.14073 | 0.022929817 |
| chr17 | 4650001 | 4750000 | 801  | 897  | 4700000  | -0.23568 | 0.000426916 |
| chr17 | 4700001 | 4800000 | 939  | 1009 | 4750000  | -0.1761  | 0.006270401 |
| chr17 | 4750001 | 4850000 | 959  | 1004 | 4800000  | -0.13853 | 0.024674233 |

|       |          |          |      |      |          |          |             |
|-------|----------|----------|------|------|----------|----------|-------------|
| chr17 | 4800001  | 4900000  | 940  | 1023 | 4850000  | -0.19445 | 0.002932944 |
| chr17 | 4850001  | 4950000  | 928  | 987  | 4900000  | -0.1613  | 0.011082604 |
| chr17 | 5050001  | 5150000  | 566  | 612  | 5100000  | -0.1851  | 0.004351542 |
| chr17 | 5100001  | 5200000  | 698  | 755  | 5150000  | -0.18562 | 0.004258783 |
| chr17 | 5950001  | 6050000  | 1070 | 1135 | 6.00E+06 | -0.15745 | 0.012767525 |
| chr17 | 6000001  | 6100000  | 1022 | 1102 | 6050000  | -0.1811  | 0.005127846 |
| chr17 | 6050001  | 6150000  | 979  | 1021 | 6100000  | -0.13297 | 0.029583509 |
| chr17 | 6300001  | 6400000  | 1025 | 1128 | 6350000  | -0.21051 | 0.001434825 |
| chr17 | 6350001  | 6450000  | 1058 | 1161 | 6400000  | -0.2064  | 0.001730676 |
| chr17 | 6400001  | 6500000  | 1003 | 1055 | 6450000  | -0.14529 | 0.01963816  |
| chr17 | 6600001  | 6700000  | 957  | 839  | 6650000  | 0.117476 | 0.048049932 |
| chr17 | 6900001  | 7000000  | 951  | 988  | 6950000  | -0.12744 | 0.035259676 |
| chr17 | 6950001  | 7050000  | 841  | 909  | 7.00E+06 | -0.18455 | 0.004452556 |
| chr17 | 7000001  | 7100000  | 866  | 913  | 7050000  | -0.14862 | 0.017501334 |
| chr17 | 7050001  | 7150000  | 959  | 1041 | 7100000  | -0.19074 | 0.003436156 |
| chr17 | 7100001  | 7200000  | 926  | 1081 | 7150000  | -0.29565 | 1.51E-05    |
| chr17 | 7150001  | 7250000  | 885  | 997  | 7200000  | -0.24429 | 0.000274741 |
| chr17 | 7200001  | 7300000  | 914  | 972  | 7250000  | -0.16113 | 0.011149964 |
| chr17 | 7250001  | 7350000  | 983  | 1032 | 7300000  | -0.14255 | 0.02156266  |
| chr17 | 7550001  | 7650000  | 893  | 935  | 7600000  | -0.13868 | 0.024552075 |
| chr17 | 7600001  | 7700000  | 935  | 977  | 7650000  | -0.13576 | 0.02702441  |
| chr17 | 7700001  | 7800000  | 1076 | 1127 | 7750000  | -0.13918 | 0.024144982 |
| chr17 | 7900001  | 8000000  | 1028 | 1097 | 7950000  | -0.1661  | 0.009253906 |
| chr17 | 7950001  | 8050000  | 988  | 1055 | 8.00E+06 | -0.16703 | 0.008929503 |
| chr17 | 8000001  | 8100000  | 944  | 1046 | 8050000  | -0.2204  | 0.000903496 |
| chr17 | 8050001  | 8150000  | 919  | 994  | 8100000  | -0.18555 | 0.004270921 |
| chr17 | 8750001  | 8850000  | 1028 | 1062 | 8800000  | -0.11932 | 0.045179041 |
| chr17 | 8850001  | 8950000  | 988  | 1046 | 8900000  | -0.15467 | 0.014121455 |
| chr17 | 9050001  | 9150000  | 1064 | 1135 | 9100000  | -0.16557 | 0.009441666 |
| chr17 | 9100001  | 9200000  | 1013 | 1099 | 9150000  | -0.18993 | 0.003556015 |
| chr17 | 9650001  | 9750000  | 987  | 1059 | 9700000  | -0.17395 | 0.006827183 |
| chr17 | 9700001  | 9800000  | 992  | 1086 | 9750000  | -0.20298 | 0.002017494 |
| chr17 | 9750001  | 9850000  | 988  | 1087 | 9800000  | -0.21014 | 0.001459677 |
| chr17 | 9800001  | 9900000  | 987  | 1051 | 9850000  | -0.16301 | 0.01039549  |
| chr17 | 10050001 | 10150000 | 871  | 912  | 10100000 | -0.13873 | 0.024507373 |
| chr17 | 10400001 | 10500000 | 959  | 778  | 10450000 | 0.229389 | 0.000610986 |
| chr17 | 10450001 | 10550000 | 988  | 825  | 10500000 | 0.187745 | 0.003999019 |
| chr17 | 10550001 | 10650000 | 938  | 1011 | 10600000 | -0.18049 | 0.005255617 |
| chr17 | 10750001 | 10850000 | 944  | 1017 | 10800000 | -0.17983 | 0.005398522 |
| chr17 | 10800001 | 10900000 | 893  | 938  | 10850000 | -0.1433  | 0.021022327 |
| chr17 | 11050001 | 11150000 | 941  | 971  | 11100000 | -0.11765 | 0.047470178 |
| chr17 | 11100001 | 11200000 | 1010 | 1119 | 11150000 | -0.22023 | 0.00091082  |
| chr17 | 12300001 | 12400000 | 985  | 864  | 12350000 | 0.116721 | 0.049124917 |
| chr17 | 12350001 | 12450000 | 1020 | 881  | 12400000 | 0.138983 | 0.024576286 |
| chr17 | 12850001 | 12950000 | 959  | 1018 | 12900000 | -0.15851 | 0.012285019 |
| chr17 | 13050001 | 13150000 | 1045 | 901  | 13100000 | 0.141532 | 0.022580315 |
| chr17 | 13600001 | 13700000 | 1023 | 850  | 13650000 | 0.1949   | 0.002958892 |

|       |          |          |      |      |          |          |             |
|-------|----------|----------|------|------|----------|----------|-------------|
| chr17 | 13650001 | 13750000 | 996  | 864  | 13700000 | 0.132743 | 0.030098497 |
| chr17 | 13700001 | 13800000 | 970  | 834  | 13750000 | 0.145566 | 0.019702489 |
| chr17 | 14150001 | 14250000 | 968  | 1010 | 14200000 | -0.13365 | 0.028947311 |
| chr17 | 14250001 | 14350000 | 1018 | 872  | 14300000 | 0.150966 | 0.016343308 |
| chr17 | 14300001 | 14400000 | 1020 | 847  | 14350000 | 0.195764 | 0.002851477 |
| chr17 | 14350001 | 14450000 | 1020 | 852  | 14400000 | 0.187272 | 0.004078193 |
| chr17 | 14600001 | 14700000 | 1070 | 930  | 14650000 | 0.129936 | 0.032899008 |
| chr17 | 15450001 | 15550000 | 76   | 91   | 15500000 | -0.33224 | 1.44E-06    |
| chr17 | 15700001 | 15800000 | 215  | 244  | 15750000 | -0.25492 | 0.000156578 |
| chr17 | 15750001 | 15850000 | 658  | 704  | 15800000 | -0.16986 | 0.008010057 |
| chr17 | 15950001 | 16050000 | 896  | 930  | 1.60E+07 | -0.1261  | 0.036753311 |
| chr17 | 16050001 | 16150000 | 777  | 655  | 16100000 | 0.174048 | 0.006943745 |
| chr17 | 16100001 | 16200000 | 839  | 658  | 16150000 | 0.278211 | 4.60E-05    |
| chr17 | 16150001 | 16250000 | 855  | 722  | 16200000 | 0.171554 | 0.007650693 |
| chr17 | 16250001 | 16350000 | 738  | 792  | 16300000 | -0.17425 | 0.00674716  |
| chr17 | 16300001 | 16400000 | 910  | 971  | 16350000 | -0.16598 | 0.009295674 |
| chr17 | 16500001 | 16600000 | 780  | 683  | 16550000 | 0.119217 | 0.045645995 |
| chr17 | 16600001 | 16700000 | 44   | 65   | 16650000 | -0.63531 | 1.37E-18    |
| chr17 | 16900001 | 17000000 | 942  | 999  | 16950000 | -0.15713 | 0.012919152 |
| chr17 | 16950001 | 17050000 | 1113 | 1183 | 1.70E+07 | -0.16037 | 0.011470912 |
| chr17 | 17000001 | 17100000 | 1118 | 1189 | 17050000 | -0.1612  | 0.011122512 |
| chr17 | 17050001 | 17150000 | 1009 | 1077 | 17100000 | -0.16646 | 0.009124975 |
| chr17 | 17150001 | 17250000 | 798  | 849  | 17200000 | -0.16175 | 0.010898412 |
| chr17 | 17200001 | 17300000 | 901  | 950  | 17250000 | -0.14877 | 0.017408294 |
| chr17 | 17300001 | 17400000 | 922  | 973  | 17350000 | -0.15004 | 0.016648585 |
| chr17 | 17350001 | 17450000 | 955  | 1102 | 17400000 | -0.27892 | 4.08E-05    |
| chr17 | 17400001 | 17500000 | 1045 | 1144 | 17450000 | -0.20296 | 0.002020011 |
| chr17 | 17500001 | 17600000 | 856  | 894  | 17550000 | -0.13504 | 0.027673743 |
| chr17 | 17550001 | 17650000 | 994  | 1141 | 17600000 | -0.27135 | 6.31E-05    |
| chr17 | 17600001 | 17700000 | 1092 | 1240 | 17650000 | -0.25574 | 0.000149783 |
| chr17 | 17650001 | 17750000 | 1124 | 1278 | 17700000 | -0.25762 | 0.000135293 |
| chr17 | 17700001 | 17800000 | 1088 | 1213 | 17750000 | -0.22927 | 0.000587494 |
| chr17 | 17850001 | 17950000 | 947  | 989  | 17900000 | -0.13498 | 0.027725965 |
| chr17 | 17950001 | 18050000 | 946  | 1028 | 1.80E+07 | -0.1923  | 0.003215443 |
| chr17 | 18000001 | 18100000 | 1078 | 1164 | 18050000 | -0.18311 | 0.004724573 |
| chr17 | 18050001 | 18150000 | 1025 | 1116 | 18100000 | -0.19508 | 0.002853168 |
| chr17 | 18100001 | 18200000 | 958  | 1061 | 18150000 | -0.2197  | 0.000933993 |
| chr17 | 18250001 | 18350000 | 300  | 236  | 18300000 | 0.273804 | 5.91E-05    |
| chr17 | 18300001 | 18400000 | 23   | 20   | 18350000 | 0.129262 | 0.033603145 |
| chr17 | 18400001 | 18500000 | 19   | 14   | 18450000 | 0.368201 | 1.36E-07    |
| chr17 | 18450001 | 18550000 | 67   | 50   | 18500000 | 0.349861 | 4.96E-07    |
| chr17 | 18550001 | 18650000 | 88   | 101  | 18600000 | -0.27115 | 6.38E-05    |
| chr17 | 18600001 | 18700000 | 120  | 130  | 18650000 | -0.18785 | 0.003881164 |
| chr17 | 18650001 | 18750000 | 100  | 116  | 18700000 | -0.2865  | 2.62E-05    |
| chr17 | 18800001 | 18900000 | 965  | 1058 | 18850000 | -0.20511 | 0.00183426  |
| chr17 | 18850001 | 18950000 | 897  | 984  | 18900000 | -0.20592 | 0.001768433 |
| chr17 | 18900001 | 19000000 | 330  | 367  | 18950000 | -0.22569 | 0.000700278 |

|       |          |          |      |      |          |          |             |
|-------|----------|----------|------|------|----------|----------|-------------|
| chr17 | 18950001 | 19050000 | 6    | 8    | 1.90E+07 | -0.48741 | 5.63E-12    |
| chr17 | 19000001 | 19100000 | 4    | 3    | 19050000 | 0.342666 | 8.12E-07    |
| chr17 | 19200001 | 19300000 | 1043 | 1110 | 19250000 | -0.16219 | 0.010719223 |
| chr17 | 19550001 | 19650000 | 969  | 1041 | 19600000 | -0.17577 | 0.006352608 |
| chr17 | 19600001 | 19700000 | 959  | 1056 | 19650000 | -0.21138 | 0.001378916 |
| chr17 | 20200001 | 20300000 | 220  | 228  | 20250000 | -0.1239  | 0.039332178 |
| chr17 | 20250001 | 20350000 | 32   | 41   | 20300000 | -0.42992 | 8.92E-10    |
| chr17 | 20300001 | 20400000 | 24   | 33   | 20350000 | -0.5318  | 8.01E-14    |
| chr17 | 20700001 | 20800000 | 361  | 392  | 20750000 | -0.19123 | 0.003365801 |
| chr17 | 20750001 | 20850000 | 542  | 564  | 20800000 | -0.12977 | 0.03276336  |
| chr17 | 21200001 | 21300000 | 1926 | 2001 | 21250000 | -0.12749 | 0.035207125 |
| chr17 | 21250001 | 21350000 | 1545 | 1781 | 21300000 | -0.27745 | 4.45E-05    |
| chr17 | 21300001 | 21400000 | 1182 | 1327 | 21350000 | -0.23931 | 0.000355047 |
| chr17 | 21450001 | 21550000 | 390  | 409  | 21500000 | -0.141   | 0.022721933 |
| chr17 | 21500001 | 21600000 | 363  | 407  | 21550000 | -0.23743 | 0.000390684 |
| chr17 | 21550001 | 21650000 | 126  | 149  | 21600000 | -0.31426 | 4.70E-06    |
| chr17 | 21600001 | 21700000 | 328  | 258  | 21650000 | 0.273953 | 5.86E-05    |
| chr17 | 21650001 | 21750000 | 638  | 527  | 21700000 | 0.203382 | 0.002046445 |
| chr17 | 21700001 | 21800000 | 734  | 636  | 21750000 | 0.134382 | 0.028556769 |
| chr17 | 21850001 | 21950000 | 380  | 400  | 21900000 | -0.14637 | 0.018921795 |
| chr17 | 21900001 | 22000000 | 489  | 534  | 21950000 | -0.19938 | 0.002366685 |
| chr17 | 21950001 | 22050000 | 554  | 605  | 2.20E+07 | -0.19942 | 0.002362125 |
| chr17 | 22000001 | 22100000 | 550  | 570  | 22050000 | -0.1239  | 0.039332178 |
| chr17 | 25200001 | 25300000 | 636  | 796  | 25250000 | -0.39611 | 1.37E-08    |
| chr17 | 25250001 | 25350000 | 877  | 993  | 25300000 | -0.25159 | 0.000187121 |
| chr17 | 25300001 | 25400000 | 488  | 428  | 25350000 | 0.116899 | 0.048870079 |
| chr17 | 25850001 | 25950000 | 1066 | 1131 | 25900000 | -0.15776 | 0.012623848 |
| chr17 | 25900001 | 26000000 | 866  | 956  | 25950000 | -0.21502 | 0.00116479  |
| chr17 | 25950001 | 26050000 | 708  | 733  | 2.60E+07 | -0.12244 | 0.041130375 |
| chr17 | 26100001 | 26200000 | 966  | 1015 | 26150000 | -0.14376 | 0.020698013 |
| chr17 | 26150001 | 26250000 | 933  | 965  | 26200000 | -0.12102 | 0.042924344 |
| chr17 | 26200001 | 26300000 | 980  | 1037 | 26250000 | -0.15393 | 0.014500676 |
| chr17 | 26350001 | 26450000 | 916  | 952  | 26400000 | -0.12799 | 0.03466031  |
| chr17 | 26600001 | 26700000 | 929  | 973  | 26650000 | -0.13913 | 0.024183748 |
| chr17 | 26650001 | 26750000 | 1004 | 1051 | 26700000 | -0.13838 | 0.024799783 |
| chr17 | 26750001 | 26850000 | 891  | 957  | 26800000 | -0.17547 | 0.006430766 |
| chr17 | 26900001 | 27000000 | 908  | 988  | 26950000 | -0.19419 | 0.002965273 |
| chr17 | 27000001 | 27100000 | 922  | 1013 | 27050000 | -0.20817 | 0.00159739  |
| chr17 | 27050001 | 27150000 | 781  | 838  | 27100000 | -0.174   | 0.006814524 |
| chr17 | 27200001 | 27300000 | 998  | 1085 | 27250000 | -0.19296 | 0.003126673 |
| chr17 | 27250001 | 27350000 | 1045 | 1099 | 27300000 | -0.14506 | 0.019795784 |
| chr17 | 27350001 | 27450000 | 1080 | 1123 | 27400000 | -0.1287  | 0.033893823 |
| chr17 | 27400001 | 27500000 | 1074 | 1199 | 27450000 | -0.23121 | 0.000533839 |
| chr17 | 27450001 | 27550000 | 907  | 980  | 27500000 | -0.18405 | 0.004544454 |
| chr17 | 27850001 | 27950000 | 940  | 1019 | 27900000 | -0.18879 | 0.003730396 |
| chr17 | 27950001 | 28050000 | 952  | 816  | 2.80E+07 | 0.150021 | 0.016892961 |
| chr17 | 28050001 | 28150000 | 927  | 775  | 28100000 | 0.186001 | 0.004297873 |

|       |          |          |      |      |          |          |             |
|-------|----------|----------|------|------|----------|----------|-------------|
| chr17 | 28100001 | 28200000 | 956  | 753  | 28150000 | 0.271989 | 6.54E-05    |
| chr17 | 28150001 | 28250000 | 863  | 755  | 28200000 | 0.120512 | 0.043920551 |
| chr17 | 28250001 | 28350000 | 878  | 769  | 28300000 | 0.118866 | 0.04612311  |
| chr17 | 28300001 | 28400000 | 857  | 736  | 28350000 | 0.147218 | 0.018617338 |
| chr17 | 28450001 | 28550000 | 971  | 799  | 28500000 | 0.208904 | 0.001598873 |
| chr17 | 28850001 | 28950000 | 531  | 563  | 28900000 | -0.15679 | 0.013077414 |
| chr17 | 28900001 | 29000000 | 179  | 220  | 28950000 | -0.36992 | 1.01E-07    |
| chr17 | 29150001 | 29250000 | 851  | 735  | 29200000 | 0.139043 | 0.024527924 |
| chr17 | 29400001 | 29500000 | 933  | 795  | 29450000 | 0.15855  | 0.01246286  |
| chr17 | 29550001 | 29650000 | 935  | 794  | 29600000 | 0.163456 | 0.010403455 |
| chr17 | 29650001 | 29750000 | 897  | 946  | 29700000 | -0.1491  | 0.017207425 |
| chr17 | 29700001 | 29800000 | 939  | 1010 | 29750000 | -0.17753 | 0.005922737 |
| chr17 | 30250001 | 30350000 | 490  | 380  | 30300000 | 0.294411 | 1.78E-05    |
| chr17 | 30300001 | 30400000 | 390  | 271  | 30350000 | 0.45281  | 1.72E-10    |
| chr17 | 30800001 | 30900000 | 1067 | 921  | 30850000 | 0.139915 | 0.023829906 |
| chr17 | 30850001 | 30950000 | 1019 | 875  | 30900000 | 0.147427 | 0.018483326 |
| chr17 | 31200001 | 31300000 | 859  | 943  | 31250000 | -0.20697 | 0.001686516 |
| chr17 | 31250001 | 31350000 | 884  | 1029 | 31300000 | -0.2915  | 1.94E-05    |
| chr17 | 31300001 | 31400000 | 923  | 1011 | 31350000 | -0.20375 | 0.001949453 |
| chr17 | 31500001 | 31600000 | 1109 | 1171 | 31550000 | -0.15085 | 0.01618078  |
| chr17 | 31550001 | 31650000 | 1082 | 1155 | 31600000 | -0.16656 | 0.009090194 |
| chr17 | 31600001 | 31700000 | 1040 | 1073 | 31650000 | -0.11744 | 0.047765354 |
| chr17 | 31800001 | 31900000 | 1080 | 1121 | 31850000 | -0.12613 | 0.036727141 |
| chr17 | 32200001 | 32300000 | 989  | 1049 | 32250000 | -0.15734 | 0.012818497 |
| chr17 | 32250001 | 32350000 | 1037 | 1094 | 32300000 | -0.14957 | 0.016929463 |
| chr17 | 32550001 | 32650000 | 1076 | 925  | 32600000 | 0.145781 | 0.01955799  |
| chr17 | 32600001 | 32700000 | 988  | 854  | 32650000 | 0.137903 | 0.025466045 |
| chr17 | 32850001 | 32950000 | 1130 | 1196 | 32900000 | -0.15427 | 0.014328732 |
| chr17 | 32900001 | 33000000 | 1118 | 1231 | 32950000 | -0.21128 | 0.001385063 |
| chr17 | 33600001 | 33700000 | 786  | 687  | 33650000 | 0.121847 | 0.042197577 |
| chr17 | 33650001 | 33750000 | 846  | 726  | 33700000 | 0.148316 | 0.0179243   |
| chr17 | 34550001 | 34650000 | 4    | 7    | 34600000 | -0.87973 | 6.33E-32    |
| chr17 | 34650001 | 34750000 | 2    | 4    | 34700000 | -1.07237 | 8.26E-44    |
| chr17 | 35200001 | 35300000 | 1027 | 1076 | 35250000 | -0.13961 | 0.023799706 |
| chr17 | 35250001 | 35350000 | 1020 | 1071 | 35300000 | -0.14276 | 0.02141004  |
| chr17 | 35400001 | 35500000 | 1039 | 911  | 35450000 | 0.117301 | 0.048297766 |
| chr17 | 35500001 | 35600000 | 969  | 842  | 35550000 | 0.130305 | 0.032519646 |
| chr17 | 35850001 | 35950000 | 949  | 832  | 35900000 | 0.117453 | 0.048083151 |
| chr17 | 36050001 | 36150000 | 1055 | 910  | 36100000 | 0.140933 | 0.023036938 |
| chr17 | 36200001 | 36300000 | 282  | 299  | 36250000 | -0.15682 | 0.013064456 |
| chr17 | 36300001 | 36400000 | 183  | 200  | 36350000 | -0.20053 | 0.002249701 |
| chr17 | 36350001 | 36450000 | 167  | 201  | 36400000 | -0.33972 | 8.64E-07    |
| chr17 | 36550001 | 36650000 | 853  | 906  | 36600000 | -0.15934 | 0.011915848 |
| chr17 | 36600001 | 36700000 | 565  | 675  | 36650000 | -0.32901 | 1.79E-06    |
| chr17 | 36650001 | 36750000 | 879  | 941  | 36700000 | -0.1707  | 0.007752395 |
| chr17 | 36750001 | 36850000 | 866  | 915  | 36800000 | -0.15178 | 0.01566066  |
| chr17 | 36800001 | 36900000 | 938  | 1030 | 36850000 | -0.20736 | 0.001657349 |

|       |          |          |      |      |          |          |             |
|-------|----------|----------|------|------|----------|----------|-------------|
| chr17 | 36850001 | 36950000 | 993  | 1038 | 36900000 | -0.13631 | 0.026543641 |
| chr17 | 37050001 | 37150000 | 850  | 742  | 37100000 | 0.123672 | 0.039932615 |
| chr17 | 37100001 | 37200000 | 808  | 678  | 37150000 | 0.180698 | 0.005333567 |
| chr17 | 37300001 | 37400000 | 977  | 1015 | 37350000 | -0.12742 | 0.035277779 |
| chr17 | 37700001 | 37800000 | 1070 | 1138 | 37750000 | -0.16126 | 0.01109724  |
| chr17 | 37750001 | 37850000 | 1107 | 1220 | 37800000 | -0.2126  | 0.001303431 |
| chr17 | 37800001 | 37900000 | 1013 | 1112 | 37850000 | -0.20689 | 0.001692409 |
| chr17 | 37850001 | 37950000 | 957  | 1053 | 37900000 | -0.21029 | 0.001449959 |
| chr17 | 37950001 | 38050000 | 974  | 823  | 3.80E+07 | 0.170658 | 0.007919846 |
| chr17 | 38050001 | 38150000 | 902  | 970  | 38100000 | -0.17723 | 0.005994484 |
| chr17 | 38100001 | 38200000 | 905  | 989  | 38150000 | -0.20042 | 0.002260013 |
| chr17 | 38150001 | 38250000 | 929  | 1011 | 38200000 | -0.1944  | 0.002938124 |
| chr17 | 38200001 | 38300000 | 996  | 1035 | 38250000 | -0.12778 | 0.034878901 |
| chr17 | 38400001 | 38500000 | 937  | 988  | 38450000 | -0.14883 | 0.017370858 |
| chr17 | 38450001 | 38550000 | 969  | 1048 | 38500000 | -0.18544 | 0.004290593 |
| chr17 | 38750001 | 38850000 | 1038 | 897  | 38800000 | 0.138255 | 0.025173537 |
| chr17 | 39050001 | 39150000 | 991  | 1030 | 39100000 | -0.12806 | 0.034580711 |
| chr17 | 39400001 | 39500000 | 841  | 921  | 39450000 | -0.20347 | 0.001974451 |
| chr17 | 39450001 | 39550000 | 1035 | 1139 | 39500000 | -0.21051 | 0.001435233 |
| chr17 | 39500001 | 39600000 | 1014 | 1051 | 39550000 | -0.12408 | 0.039122279 |
| chr17 | 39550001 | 39650000 | 995  | 1058 | 39600000 | -0.16094 | 0.011229265 |
| chr17 | 39600001 | 39700000 | 1024 | 1066 | 39650000 | -0.13036 | 0.03215727  |
| chr17 | 39650001 | 39750000 | 996  | 1034 | 39700000 | -0.12639 | 0.036428097 |
| chr17 | 39700001 | 39800000 | 830  | 889  | 39750000 | -0.17144 | 0.0075323   |
| chr17 | 39750001 | 39850000 | 816  | 919  | 39800000 | -0.24387 | 0.000280803 |
| chr17 | 39800001 | 39900000 | 875  | 958  | 39850000 | -0.20311 | 0.002005782 |
| chr17 | 39850001 | 39950000 | 841  | 895  | 39900000 | -0.16215 | 0.010734689 |
| chr17 | 39900001 | 40000000 | 844  | 974  | 39950000 | -0.27905 | 4.05E-05    |
| chr17 | 39950001 | 40050000 | 823  | 956  | 4.00E+07 | -0.28849 | 2.32E-05    |
| chr17 | 40150001 | 40250000 | 949  | 988  | 40200000 | -0.13047 | 0.032043938 |
| chr17 | 40200001 | 40300000 | 976  | 1013 | 40250000 | -0.12605 | 0.036811283 |
| chr17 | 40400001 | 40500000 | 916  | 786  | 40450000 | 0.148447 | 0.017843671 |
| chr17 | 40450001 | 40550000 | 899  | 758  | 40500000 | 0.173751 | 0.00702462  |
| chr17 | 40500001 | 40600000 | 852  | 736  | 40550000 | 0.138776 | 0.024745186 |
| chr17 | 40550001 | 40650000 | 872  | 724  | 40600000 | 0.195967 | 0.002826734 |
| chr17 | 40600001 | 40700000 | 923  | 798  | 40650000 | 0.13757  | 0.025745783 |
| chr17 | 40900001 | 41000000 | 952  | 1023 | 40950000 | -0.17614 | 0.006259543 |
| chr17 | 40950001 | 41050000 | 944  | 994  | 4.10E+07 | -0.14683 | 0.018624313 |
| chr17 | 41250001 | 41350000 | 651  | 713  | 41300000 | -0.20362 | 0.001961334 |
| chr17 | 41300001 | 41400000 | 847  | 888  | 41350000 | -0.14057 | 0.023051326 |
| chr17 | 41750001 | 41850000 | 994  | 1080 | 41800000 | -0.19209 | 0.003245013 |
| chr17 | 41800001 | 41900000 | 948  | 1015 | 41850000 | -0.17089 | 0.007695627 |
| chr17 | 41900001 | 42000000 | 999  | 1080 | 41950000 | -0.18485 | 0.004397664 |
| chr17 | 41950001 | 42050000 | 895  | 1025 | 4.20E+07 | -0.26804 | 7.61E-05    |
| chr17 | 42000001 | 42100000 | 837  | 913  | 42050000 | -0.19776 | 0.002540468 |
| chr17 | 42200001 | 42300000 | 891  | 919  | 42250000 | -0.11701 | 0.048370184 |
| chr17 | 42250001 | 42350000 | 938  | 1063 | 42300000 | -0.25285 | 0.000174906 |

|       |          |          |      |      |          |          |             |
|-------|----------|----------|------|------|----------|----------|-------------|
| chr17 | 42300001 | 42400000 | 880  | 989  | 42350000 | -0.24084 | 0.000328315 |
| chr17 | 42350001 | 42450000 | 849  | 943  | 42400000 | -0.22386 | 0.000764898 |
| chr17 | 42400001 | 42500000 | 869  | 915  | 42450000 | -0.14679 | 0.018652322 |
| chr17 | 42800001 | 42900000 | 891  | 947  | 42850000 | -0.16031 | 0.011495331 |
| chr17 | 42850001 | 42950000 | 849  | 895  | 42900000 | -0.14849 | 0.017577697 |
| chr17 | 42900001 | 43000000 | 909  | 972  | 42950000 | -0.16905 | 0.008265076 |
| chr17 | 42950001 | 43050000 | 976  | 1080 | 4.30E+07 | -0.21845 | 0.00099102  |
| chr17 | 43000001 | 43100000 | 1011 | 1061 | 43050000 | -0.14201 | 0.021958469 |
| chr17 | 43100001 | 43200000 | 878  | 905  | 43150000 | -0.11607 | 0.049726666 |
| chr17 | 43150001 | 43250000 | 895  | 988  | 43200000 | -0.215   | 0.001165892 |
| chr17 | 43200001 | 43300000 | 817  | 845  | 43250000 | -0.12099 | 0.042971673 |
| chr17 | 43250001 | 43350000 | 912  | 944  | 43300000 | -0.12212 | 0.04151994  |
| chr17 | 43300001 | 43400000 | 1021 | 1055 | 43350000 | -0.11963 | 0.044754088 |
| chr17 | 43800001 | 43900000 | 1076 | 1157 | 43850000 | -0.17708 | 0.006029698 |
| chr17 | 43850001 | 43950000 | 1074 | 1212 | 43900000 | -0.24677 | 0.000241398 |
| chr17 | 43900001 | 44000000 | 1016 | 1086 | 43950000 | -0.1685  | 0.008442636 |
| chr17 | 44000001 | 44100000 | 997  | 1028 | 44050000 | -0.11655 | 0.049035009 |
| chr17 | 44250001 | 44350000 | 492  | 516  | 44300000 | -0.14108 | 0.02265636  |
| chr17 | 44350001 | 44450000 | 57   | 59   | 44400000 | -0.12212 | 0.04151994  |
| chr17 | 44400001 | 44500000 | 5    | 2    | 44450000 | 1.249556 | 2.09E-53    |
| chr17 | 44450001 | 44550000 | 3    | 2    | 44500000 | 0.512591 | 8.10E-13    |
| chr17 | 44500001 | 44600000 | 11   | 7    | 44550000 | 0.579705 | 1.10E-15    |
| chr17 | 44550001 | 44650000 | 12   | 5    | 44600000 | 1.190663 | 9.15E-50    |
| chr17 | 44600001 | 44700000 | 4    | 2    | 44650000 | 0.927628 | 7.06E-34    |
| chr17 | 44650001 | 44750000 | 5    | 6    | 44700000 | -0.33541 | 1.16E-06    |
| chr17 | 44800001 | 44900000 | 1058 | 1112 | 44850000 | -0.14419 | 0.020394913 |
| chr17 | 44850001 | 44950000 | 1032 | 1092 | 44900000 | -0.1539  | 0.014517508 |
| chr17 | 44900001 | 45000000 | 999  | 1099 | 44950000 | -0.21001 | 0.001468685 |
| chr17 | 44950001 | 45050000 | 988  | 1070 | 4.50E+07 | -0.1874  | 0.003954825 |
| chr17 | 45000001 | 45100000 | 844  | 893  | 45050000 | -0.15379 | 0.014576276 |
| chr17 | 45100001 | 45200000 | 462  | 378  | 45150000 | 0.217135 | 0.001095891 |
| chr17 | 45150001 | 45250000 | 996  | 861  | 45200000 | 0.137761 | 0.025585386 |
| chr17 | 45550001 | 45650000 | 109  | 113  | 45600000 | -0.12437 | 0.038776351 |
| chr17 | 45750001 | 45850000 | 978  | 1051 | 45800000 | -0.17623 | 0.006238742 |
| chr17 | 45800001 | 45900000 | 927  | 1021 | 45850000 | -0.21171 | 0.001357809 |
| chr17 | 45850001 | 45950000 | 1008 | 1090 | 45900000 | -0.1852  | 0.004333045 |
| chr17 | 46250001 | 46350000 | 1092 | 951  | 46300000 | 0.127084 | 0.035963259 |
| chr17 | 46300001 | 46400000 | 1060 | 891  | 46350000 | 0.178195 | 0.005895703 |
| chr17 | 46350001 | 46450000 | 1046 | 894  | 46400000 | 0.154164 | 0.014595612 |
| chr17 | 46400001 | 46500000 | 1040 | 901  | 46450000 | 0.134613 | 0.028344656 |
| chr17 | 47450001 | 47550000 | 913  | 950  | 47500000 | -0.12968 | 0.032856377 |
| chr17 | 47500001 | 47600000 | 1027 | 1106 | 47550000 | -0.17929 | 0.00551887  |
| chr17 | 47550001 | 47650000 | 976  | 1059 | 47600000 | -0.19012 | 0.003527225 |
| chr17 | 47600001 | 47700000 | 948  | 985  | 47650000 | -0.12761 | 0.035071872 |
| chr17 | 48000001 | 48100000 | 981  | 1062 | 48050000 | -0.18683 | 0.004049917 |
| chr17 | 48050001 | 48150000 | 996  | 1076 | 48100000 | -0.18383 | 0.004585582 |
| chr17 | 48100001 | 48200000 | 1091 | 1173 | 48150000 | -0.17692 | 0.006068088 |



|       |          |          |      |      |          |          |             |
|-------|----------|----------|------|------|----------|----------|-------------|
| chr17 | 48150001 | 48250000 | 1084 | 1241 | 48200000 | -0.26751 | 7.84E-05    |
| chr17 | 48200001 | 48300000 | 1098 | 1258 | 48250000 | -0.26863 | 7.36E-05    |
| chr17 | 48250001 | 48350000 | 1045 | 1133 | 48300000 | -0.18902 | 0.003695482 |
| chr17 | 48300001 | 48400000 | 942  | 1000 | 48350000 | -0.15857 | 0.012255234 |
| chr17 | 48350001 | 48450000 | 999  | 1101 | 48400000 | -0.21263 | 0.001301503 |
| chr17 | 48400001 | 48500000 | 908  | 1009 | 48450000 | -0.22453 | 0.00074055  |
| chr17 | 48450001 | 48550000 | 879  | 917  | 48500000 | -0.13343 | 0.029151538 |
| chr17 | 48550001 | 48650000 | 1065 | 1116 | 48600000 | -0.13986 | 0.023608552 |
| chr17 | 48600001 | 48700000 | 1201 | 1279 | 48650000 | -0.16315 | 0.010341311 |
| chr17 | 48850001 | 48950000 | 970  | 1037 | 48900000 | -0.16873 | 0.008366508 |
| chr17 | 48900001 | 49000000 | 958  | 1003 | 48950000 | -0.1386  | 0.02461907  |
| chr17 | 48950001 | 49050000 | 964  | 998  | 4.90E+07 | -0.12238 | 0.041201808 |
| chr17 | 49450001 | 49550000 | 976  | 1020 | 49500000 | -0.13599 | 0.026827328 |
| chr17 | 49900001 | 50000000 | 1131 | 968  | 49950000 | 0.152148 | 0.015677318 |
| chr17 | 51300001 | 51400000 | 1081 | 901  | 51350000 | 0.190396 | 0.003580456 |
| chr17 | 51700001 | 51800000 | 1031 | 899  | 51750000 | 0.12528  | 0.038019903 |
| chr17 | 51950001 | 52050000 | 933  | 808  | 5.20E+07 | 0.13515  | 0.027856859 |
| chr17 | 52150001 | 52250000 | 888  | 777  | 52200000 | 0.120273 | 0.044234652 |
| chr17 | 52200001 | 52300000 | 929  | 801  | 52250000 | 0.141505 | 0.022601154 |
| chr17 | 52250001 | 52350000 | 1009 | 870  | 52300000 | 0.141467 | 0.022629508 |
| chr17 | 53050001 | 53150000 | 991  | 840  | 53100000 | 0.166124 | 0.009413349 |
| chr17 | 53450001 | 53550000 | 880  | 920  | 53500000 | -0.1365  | 0.026379237 |
| chr17 | 53550001 | 53650000 | 941  | 803  | 53600000 | 0.156423 | 0.013460939 |
| chr17 | 53600001 | 53700000 | 1055 | 902  | 53650000 | 0.153672 | 0.014853697 |
| chr17 | 54450001 | 54550000 | 972  | 836  | 54500000 | 0.145082 | 0.020030427 |
| chr17 | 54700001 | 54800000 | 1094 | 1140 | 54750000 | -0.13179 | 0.030725911 |
| chr17 | 54750001 | 54850000 | 1024 | 1091 | 54800000 | -0.16381 | 0.010089987 |
| chr17 | 55250001 | 55350000 | 915  | 965  | 55300000 | -0.14913 | 0.01719237  |
| chr17 | 55700001 | 55800000 | 1070 | 1120 | 55750000 | -0.13826 | 0.024894794 |
| chr17 | 55850001 | 55950000 | 966  | 1012 | 55900000 | -0.13949 | 0.023901227 |
| chr17 | 55900001 | 56000000 | 948  | 1023 | 55950000 | -0.18222 | 0.004899297 |
| chr17 | 56100001 | 56200000 | 1009 | 1055 | 56150000 | -0.13669 | 0.026218295 |
| chr17 | 56700001 | 56800000 | 805  | 673  | 56750000 | 0.186011 | 0.004296236 |
| chr17 | 56750001 | 56850000 | 821  | 689  | 56800000 | 0.180506 | 0.00537488  |
| chr17 | 56800001 | 56900000 | 869  | 720  | 56850000 | 0.198988 | 0.002481059 |
| chr17 | 56850001 | 56950000 | 903  | 717  | 56900000 | 0.260381 | 0.000124088 |
| chr17 | 56900001 | 57000000 | 908  | 765  | 56950000 | 0.174861 | 0.006726187 |
| chr17 | 57250001 | 57350000 | 800  | 652  | 57300000 | 0.222756 | 0.000840967 |
| chr17 | 57300001 | 57400000 | 772  | 675  | 57350000 | 0.121342 | 0.04284374  |
| chr17 | 57800001 | 57900000 | 849  | 711  | 57850000 | 0.183543 | 0.004753131 |
| chr17 | 57850001 | 57950000 | 840  | 721  | 57900000 | 0.148018 | 0.018110088 |
| chr17 | 58200001 | 58300000 | 589  | 614  | 58250000 | -0.13234 | 0.03018948  |
| chr17 | 58550001 | 58650000 | 817  | 714  | 58600000 | 0.12204  | 0.041953411 |
| chr17 | 58850001 | 58950000 | 943  | 789  | 58900000 | 0.184861 | 0.004504017 |
| chr17 | 58900001 | 59000000 | 916  | 776  | 58950000 | 0.166919 | 0.009134743 |
| chr17 | 59400001 | 59500000 | 1071 | 1133 | 59450000 | -0.15356 | 0.014695678 |
| chr17 | 59750001 | 59850000 | 943  | 778  | 59800000 | 0.205116 | 0.001894916 |

|       |          |          |      |      |          |          |             |
|-------|----------|----------|------|------|----------|----------|-------------|
| chr17 | 59800001 | 59900000 | 1001 | 818  | 59850000 | 0.218897 | 0.001009183 |
| chr17 | 59900001 | 60000000 | 884  | 760  | 59950000 | 0.145675 | 0.019628875 |
| chr17 | 59950001 | 60050000 | 844  | 704  | 6.00E+07 | 0.189296 | 0.003749111 |
| chr17 | 60200001 | 60300000 | 642  | 670  | 60250000 | -0.13396 | 0.028657297 |
| chr17 | 60350001 | 60450000 | 558  | 585  | 60400000 | -0.14054 | 0.023071575 |
| chr17 | 60700001 | 60800000 | 932  | 1064 | 60750000 | -0.26347 | 9.82E-05    |
| chr17 | 60750001 | 60850000 | 945  | 1021 | 60800000 | -0.18397 | 0.004559937 |
| chr17 | 61100001 | 61200000 | 1041 | 896  | 61150000 | 0.144028 | 0.020760648 |
| chr17 | 61150001 | 61250000 | 1062 | 887  | 61200000 | 0.187406 | 0.004055637 |
| chr17 | 61300001 | 61400000 | 964  | 808  | 61350000 | 0.182306 | 0.004998207 |
| chr17 | 61450001 | 61550000 | 951  | 1014 | 61500000 | -0.16491 | 0.009678257 |
| chr17 | 61500001 | 61600000 | 973  | 1117 | 61550000 | -0.27149 | 6.26E-05    |
| chr17 | 61550001 | 61650000 | 1008 | 1098 | 61600000 | -0.19575 | 0.002771797 |
| chr17 | 61650001 | 61750000 | 921  | 961  | 61700000 | -0.13371 | 0.028892247 |
| chr17 | 62150001 | 62250000 | 968  | 1039 | 62200000 | -0.17449 | 0.006684301 |
| chr17 | 62200001 | 62300000 | 929  | 976  | 62250000 | -0.14357 | 0.020826749 |
| chr17 | 62250001 | 62350000 | 984  | 1019 | 62300000 | -0.1228  | 0.040682874 |
| chr17 | 62850001 | 62950000 | 214  | 233  | 62900000 | -0.19509 | 0.002852424 |
| chr17 | 63400001 | 63500000 | 973  | 1018 | 63450000 | -0.1376  | 0.025445524 |
| chr17 | 63450001 | 63550000 | 984  | 1019 | 63500000 | -0.1228  | 0.040682874 |
| chr17 | 63800001 | 63900000 | 1051 | 910  | 63850000 | 0.135452 | 0.027585378 |
| chr17 | 63950001 | 64050000 | 1065 | 887  | 6.40E+07 | 0.191476 | 0.003421552 |
| chr17 | 64000001 | 64100000 | 1022 | 885  | 64050000 | 0.135274 | 0.027745237 |
| chr17 | 64800001 | 64900000 | 1040 | 1150 | 64850000 | -0.21742 | 0.001040346 |
| chr17 | 64850001 | 64950000 | 982  | 1107 | 64900000 | -0.24523 | 0.000261567 |
| chr17 | 64900001 | 65000000 | 1019 | 1098 | 64950000 | -0.1801  | 0.005341341 |
| chr17 | 64950001 | 65050000 | 1047 | 1151 | 6.50E+07 | -0.209   | 0.001538024 |
| chr17 | 65000001 | 65100000 | 986  | 1054 | 65050000 | -0.16859 | 0.008412954 |
| chr17 | 65350001 | 65450000 | 892  | 748  | 65400000 | 0.181634 | 0.005136095 |
| chr17 | 65500001 | 65600000 | 991  | 862  | 65550000 | 0.128825 | 0.034065738 |
| chr17 | 65550001 | 65650000 | 1005 | 834  | 65600000 | 0.196704 | 0.002738507 |
| chr17 | 65600001 | 65700000 | 971  | 834  | 65650000 | 0.147052 | 0.01872371  |
| chr17 | 65850001 | 65950000 | 851  | 732  | 65900000 | 0.144944 | 0.020124702 |
| chr17 | 66100001 | 66200000 | 613  | 656  | 66150000 | -0.17018 | 0.007911182 |
| chr17 | 66200001 | 66300000 | 658  | 569  | 66250000 | 0.137287 | 0.025985466 |
| chr17 | 66350001 | 66450000 | 887  | 921  | 66400000 | -0.12664 | 0.036147971 |
| chr17 | 66400001 | 66500000 | 863  | 917  | 66450000 | -0.15993 | 0.011656945 |
| chr17 | 67100001 | 67200000 | 996  | 855  | 67150000 | 0.14785  | 0.018216005 |
| chr17 | 67250001 | 67350000 | 947  | 800  | 67300000 | 0.170993 | 0.007818253 |
| chr17 | 67300001 | 67400000 | 911  | 768  | 67350000 | 0.173973 | 0.006964116 |
| chr17 | 67700001 | 67800000 | 980  | 1014 | 67750000 | -0.12158 | 0.04221543  |
| chr17 | 68600001 | 68700000 | 1039 | 887  | 68650000 | 0.155818 | 0.013757166 |
| chr17 | 68650001 | 68750000 | 1035 | 884  | 68700000 | 0.155141 | 0.014095347 |
| chr17 | 68700001 | 68800000 | 1018 | 854  | 68750000 | 0.181058 | 0.005256873 |
| chr17 | 68750001 | 68850000 | 964  | 800  | 68800000 | 0.196661 | 0.002743587 |
| chr17 | 69100001 | 69200000 | 1025 | 871  | 69150000 | 0.162508 | 0.010776559 |
| chr17 | 69150001 | 69250000 | 1056 | 905  | 69200000 | 0.150248 | 0.016759095 |

|       |          |          |      |      |          |          |             |
|-------|----------|----------|------|------|----------|----------|-------------|
| chr17 | 69300001 | 69400000 | 995  | 855  | 69350000 | 0.1464   | 0.019147641 |
| chr17 | 69350001 | 69450000 | 1010 | 876  | 69400000 | 0.132981 | 0.02987031  |
| chr17 | 69450001 | 69550000 | 1111 | 953  | 69500000 | 0.148939 | 0.01754147  |
| chr17 | 69500001 | 69600000 | 1107 | 918  | 69550000 | 0.197717 | 0.002621434 |
| chr17 | 69550001 | 69650000 | 1015 | 854  | 69600000 | 0.1768   | 0.0062314   |
| chr17 | 69600001 | 69700000 | 962  | 840  | 69650000 | 0.123276 | 0.040415722 |
| chr17 | 70250001 | 70350000 | 1039 | 1136 | 70300000 | -0.20114 | 0.002189778 |
| chr17 | 70300001 | 70400000 | 1008 | 1118 | 70350000 | -0.2218  | 0.000844972 |
| chr17 | 70350001 | 70450000 | 1000 | 1041 | 70400000 | -0.13034 | 0.032179372 |
| chr17 | 70450001 | 70550000 | 931  | 962  | 70500000 | -0.11963 | 0.04475998  |
| chr17 | 70500001 | 70600000 | 948  | 1016 | 70550000 | -0.17231 | 0.00728097  |
| chr17 | 70550001 | 70650000 | 983  | 1058 | 70600000 | -0.17845 | 0.005708539 |
| chr17 | 70600001 | 70700000 | 993  | 1029 | 70650000 | -0.12375 | 0.03951667  |
| chr17 | 70700001 | 70800000 | 937  | 967  | 70750000 | -0.11784 | 0.047204033 |
| chr17 | 71350001 | 71450000 | 1030 | 1065 | 71400000 | -0.12058 | 0.043499775 |
| chr17 | 71400001 | 71500000 | 1000 | 1074 | 71450000 | -0.17537 | 0.006456196 |
| chr17 | 71450001 | 71550000 | 1099 | 1201 | 71500000 | -0.20042 | 0.002260807 |
| chr17 | 71500001 | 71600000 | 1159 | 1198 | 71550000 | -0.12012 | 0.044106508 |
| chr17 | 71650001 | 71750000 | 1036 | 1072 | 71700000 | -0.12165 | 0.042117446 |
| chr17 | 71750001 | 71850000 | 1053 | 1140 | 71800000 | -0.1869  | 0.004038168 |
| chr17 | 71800001 | 71900000 | 1051 | 1085 | 71850000 | -0.1183  | 0.04655791  |
| chr17 | 72150001 | 72250000 | 989  | 1129 | 72200000 | -0.26337 | 9.87E-05    |
| chr17 | 72200001 | 72300000 | 952  | 1057 | 72250000 | -0.22331 | 0.000785524 |
| chr17 | 72300001 | 72400000 | 1057 | 1092 | 72350000 | -0.11937 | 0.045106368 |
| chr17 | 72350001 | 72450000 | 991  | 1028 | 72400000 | -0.12526 | 0.037730475 |
| chr17 | 72400001 | 72500000 | 927  | 963  | 72450000 | -0.12734 | 0.035369071 |
| chr17 | 72450001 | 72550000 | 944  | 1000 | 72500000 | -0.15551 | 0.013699426 |
| chr17 | 72500001 | 72600000 | 1037 | 1086 | 72550000 | -0.13898 | 0.024307075 |
| chr17 | 72700001 | 72800000 | 993  | 1099 | 72750000 | -0.2187  | 0.00097947  |
| chr17 | 72750001 | 72850000 | 1067 | 1268 | 72800000 | -0.32137 | 2.96E-06    |
| chr17 | 72800001 | 72900000 | 1056 | 1301 | 72850000 | -0.37338 | 7.78E-08    |
| chr17 | 72850001 | 72950000 | 913  | 1040 | 72900000 | -0.26027 | 0.000117073 |
| chr17 | 72900001 | 73000000 | 885  | 942  | 72950000 | -0.16242 | 0.010627925 |
| chr17 | 72950001 | 73050000 | 827  | 892  | 7.30E+07 | -0.18153 | 0.005039396 |
| chr17 | 73000001 | 73100000 | 799  | 855  | 73050000 | -0.1701  | 0.007935676 |
| chr17 | 73050001 | 73150000 | 853  | 889  | 73100000 | -0.13201 | 0.030513702 |
| chr17 | 73200001 | 73300000 | 781  | 815  | 73250000 | -0.13385 | 0.028759713 |
| chr17 | 73250001 | 73350000 | 778  | 827  | 73300000 | -0.16049 | 0.011419793 |
| chr17 | 73400001 | 73500000 | 831  | 870  | 73450000 | -0.13854 | 0.024665747 |
| chr17 | 73450001 | 73550000 | 950  | 1073 | 73500000 | -0.24802 | 0.000226003 |
| chr17 | 73500001 | 73600000 | 955  | 1096 | 73550000 | -0.27105 | 6.42E-05    |
| chr17 | 73550001 | 73650000 | 986  | 1183 | 73600000 | -0.33516 | 1.18E-06    |
| chr17 | 73600001 | 73700000 | 1009 | 1124 | 73650000 | -0.22809 | 0.000622748 |
| chr17 | 73650001 | 73750000 | 929  | 980  | 73700000 | -0.14947 | 0.0169852   |
| chr17 | 73800001 | 73900000 | 869  | 1003 | 73850000 | -0.27927 | 4.00E-05    |
| chr17 | 73850001 | 73950000 | 869  | 947  | 73900000 | -0.19638 | 0.002697617 |
| chr17 | 73950001 | 74050000 | 818  | 861  | 7.40E+07 | -0.14628 | 0.018979485 |

|       |          |          |      |      |          |          |             |
|-------|----------|----------|------|------|----------|----------|-------------|
| chr17 | 74000001 | 74100000 | 895  | 972  | 74050000 | -0.19144 | 0.003335354 |
| chr17 | 74400001 | 74500000 | 982  | 1035 | 74450000 | -0.14821 | 0.017754703 |
| chr17 | 74450001 | 74550000 | 931  | 1043 | 74500000 | -0.23626 | 0.000414592 |
| chr17 | 74500001 | 74600000 | 897  | 931  | 74550000 | -0.12604 | 0.036820338 |
| chr17 | 74850001 | 74950000 | 1004 | 1048 | 74900000 | -0.13425 | 0.028387928 |
| chr17 | 74950001 | 75050000 | 976  | 851  | 7.50E+07 | 0.12535  | 0.037937535 |
| chr17 | 75000001 | 75100000 | 895  | 783  | 75050000 | 0.120504 | 0.043931751 |
| chr17 | 75050001 | 75150000 | 788  | 839  | 75100000 | -0.16285 | 0.010460119 |
| chr17 | 75200001 | 75300000 | 945  | 978  | 75250000 | -0.12189 | 0.041813819 |
| chr17 | 75400001 | 75500000 | 1008 | 1114 | 75450000 | -0.21663 | 0.00108012  |
| chr17 | 75450001 | 75550000 | 970  | 1080 | 75500000 | -0.22735 | 0.000645782 |
| chr17 | 75650001 | 75750000 | 1052 | 1097 | 75700000 | -0.1328  | 0.029748879 |
| chr17 | 75700001 | 75800000 | 1046 | 1085 | 75750000 | -0.12518 | 0.037813307 |
| chr17 | 76050001 | 76150000 | 977  | 1106 | 76100000 | -0.25129 | 0.000190092 |
| chr17 | 76100001 | 76200000 | 928  | 1136 | 76150000 | -0.36414 | 1.54E-07    |
| chr17 | 76150001 | 76250000 | 880  | 966  | 76200000 | -0.20689 | 0.001692635 |
| chr17 | 76200001 | 76300000 | 887  | 962  | 76250000 | -0.18947 | 0.003624882 |
| chr17 | 76250001 | 76350000 | 920  | 1023 | 76300000 | -0.22547 | 0.000707591 |
| chr17 | 76300001 | 76400000 | 961  | 1006 | 76350000 | -0.13839 | 0.024784531 |
| chr17 | 76750001 | 76850000 | 942  | 976  | 76800000 | -0.12353 | 0.039787267 |
| chr17 | 76800001 | 76900000 | 936  | 979  | 76850000 | -0.13717 | 0.02580485  |
| chr17 | 76950001 | 77050000 | 1003 | 1051 | 7.70E+07 | -0.13981 | 0.023642096 |
| chr17 | 77000001 | 77100000 | 1014 | 1104 | 77050000 | -0.19505 | 0.002856939 |
| chr17 | 77050001 | 77150000 | 1055 | 1208 | 77100000 | -0.26775 | 7.73E-05    |
| chr17 | 77100001 | 77200000 | 1117 | 1285 | 77150000 | -0.27451 | 5.27E-05    |
| chr17 | 77150001 | 77250000 | 1135 | 1253 | 77200000 | -0.21507 | 0.001162043 |
| chr17 | 77200001 | 77300000 | 1129 | 1217 | 77250000 | -0.18066 | 0.005221492 |
| chr17 | 77250001 | 77350000 | 1114 | 1181 | 77300000 | -0.15663 | 0.013155285 |
| chr17 | 77300001 | 77400000 | 1105 | 1214 | 77350000 | -0.20809 | 0.001602739 |
| chr17 | 77350001 | 77450000 | 1092 | 1221 | 77400000 | -0.23346 | 0.000477161 |
| chr17 | 77400001 | 77500000 | 1032 | 1158 | 77450000 | -0.23856 | 0.000368817 |
| chr17 | 77450001 | 77550000 | 652  | 715  | 77500000 | -0.20544 | 0.001807024 |
| chr17 | 77550001 | 77650000 | 211  | 225  | 77600000 | -0.16505 | 0.009626577 |
| chr17 | 77600001 | 77700000 | 662  | 729  | 77650000 | -0.21146 | 0.00137381  |
| chr17 | 77650001 | 77750000 | 901  | 1021 | 77700000 | -0.25276 | 0.000175824 |
| chr17 | 77700001 | 77800000 | 929  | 1157 | 77750000 | -0.38901 | 2.38E-08    |
| chr17 | 77750001 | 77850000 | 977  | 1248 | 77800000 | -0.42556 | 1.28E-09    |
| chr17 | 77800001 | 77900000 | 998  | 1151 | 77850000 | -0.27815 | 4.27E-05    |
| chr17 | 77850001 | 77950000 | 1025 | 1101 | 77900000 | -0.17556 | 0.006406043 |
| chr17 | 77950001 | 78050000 | 1003 | 1064 | 7.80E+07 | -0.15755 | 0.012723323 |
| chr17 | 78000001 | 78100000 | 927  | 1069 | 78050000 | -0.27799 | 4.31E-05    |
| chr17 | 78050001 | 78150000 | 922  | 992  | 78100000 | -0.17795 | 0.00582501  |
| chr17 | 78200001 | 78300000 | 901  | 949  | 78250000 | -0.14725 | 0.018354004 |
| chr17 | 78300001 | 78400000 | 858  | 928  | 78350000 | -0.18552 | 0.004276917 |
| chr17 | 78350001 | 78450000 | 912  | 1092 | 78400000 | -0.33224 | 1.44E-06    |
| chr17 | 78400001 | 78500000 | 986  | 1205 | 78450000 | -0.36175 | 1.83E-07    |
| chr17 | 78450001 | 78550000 | 889  | 1002 | 78500000 | -0.245   | 0.000264763 |

|       |          |          |      |      |          |          |             |
|-------|----------|----------|------|------|----------|----------|-------------|
| chr17 | 78500001 | 78600000 | 887  | 936  | 78550000 | -0.14995 | 0.016706428 |
| chr17 | 78550001 | 78650000 | 973  | 1023 | 78600000 | -0.14467 | 0.02006484  |
| chr17 | 78750001 | 78850000 | 1064 | 1133 | 78800000 | -0.16302 | 0.010391974 |
| chr17 | 78800001 | 78900000 | 1016 | 1207 | 78850000 | -0.3209  | 3.05E-06    |
| chr17 | 78850001 | 78950000 | 1015 | 1124 | 78900000 | -0.21953 | 0.000941341 |
| chr17 | 78900001 | 79000000 | 1012 | 1067 | 78950000 | -0.14872 | 0.017438446 |
| chr17 | 78950001 | 79050000 | 1043 | 1194 | 7.90E+07 | -0.26744 | 7.87E-05    |
| chr17 | 79000001 | 79100000 | 1111 | 1356 | 79050000 | -0.35987 | 2.09E-07    |
| chr17 | 79050001 | 79150000 | 1028 | 1335 | 79100000 | -0.44937 | 1.70E-10    |
| chr17 | 79100001 | 79200000 | 963  | 1272 | 79150000 | -0.47386 | 1.94E-11    |
| chr17 | 79150001 | 79250000 | 1053 | 1218 | 79200000 | -0.28238 | 3.34E-05    |
| chr17 | 79200001 | 79300000 | 1121 | 1172 | 79250000 | -0.13656 | 0.026330861 |
| chr17 | 79250001 | 79350000 | 1014 | 1093 | 79300000 | -0.18061 | 0.005231662 |
| chr17 | 79300001 | 79400000 | 1018 | 1240 | 79350000 | -0.35697 | 2.58E-07    |
| chr17 | 79350001 | 79450000 | 1127 | 1398 | 79400000 | -0.38325 | 3.70E-08    |
| chr17 | 79400001 | 79500000 | 1015 | 1183 | 79450000 | -0.29334 | 1.74E-05    |
| chr17 | 79450001 | 79550000 | 992  | 1068 | 79500000 | -0.17887 | 0.005612117 |
| chr17 | 79500001 | 79600000 | 928  | 977  | 79550000 | -0.14661 | 0.018769975 |
| chr17 | 79550001 | 79650000 | 763  | 895  | 79600000 | -0.30258 | 9.84E-06    |
| chr17 | 79600001 | 79700000 | 844  | 1118 | 79650000 | -0.47798 | 1.34E-11    |
| chr17 | 79650001 | 79750000 | 555  | 737  | 79700000 | -0.48155 | 9.66E-12    |
| chr17 | 79700001 | 79800000 | 472  | 577  | 79750000 | -0.36216 | 1.77E-07    |
| chr17 | 79750001 | 79850000 | 852  | 996  | 79800000 | -0.29766 | 1.33E-05    |
| chr17 | 79800001 | 79900000 | 987  | 1161 | 79850000 | -0.30662 | 7.64E-06    |
| chr17 | 79850001 | 79950000 | 929  | 1216 | 79900000 | -0.46076 | 6.28E-11    |
| chr17 | 79900001 | 80000000 | 955  | 1234 | 79950000 | -0.44214 | 3.17E-10    |
| chr17 | 79950001 | 80050000 | 1039 | 1269 | 8.00E+07 | -0.36087 | 1.95E-07    |
| chr17 | 80000001 | 80100000 | 928  | 1127 | 80050000 | -0.35266 | 3.50E-07    |
| chr17 | 80050001 | 80150000 | 887  | 1012 | 80100000 | -0.26258 | 0.000103124 |
| chr17 | 80100001 | 80200000 | 947  | 1091 | 80150000 | -0.27659 | 4.68E-05    |
| chr17 | 80150001 | 80250000 | 987  | 1129 | 80200000 | -0.2663  | 8.39E-05    |
| chr17 | 80200001 | 80300000 | 1010 | 1128 | 80250000 | -0.23178 | 0.00051883  |
| chr17 | 80250001 | 80350000 | 999  | 1116 | 80300000 | -0.23215 | 0.000509399 |
| chr17 | 80300001 | 80400000 | 945  | 1085 | 80350000 | -0.27168 | 6.19E-05    |
| chr17 | 80350001 | 80450000 | 928  | 1043 | 80400000 | -0.24091 | 0.000327045 |
| chr17 | 80600001 | 80700000 | 886  | 956  | 80650000 | -0.18208 | 0.004928062 |
| chr17 | 80650001 | 80750000 | 792  | 924  | 80700000 | -0.29476 | 1.59E-05    |
| chr17 | 80700001 | 80800000 | 919  | 1016 | 80750000 | -0.21714 | 0.0010545   |
| chr17 | 80750001 | 80850000 | 1038 | 1142 | 80800000 | -0.21013 | 0.001460533 |
| chr17 | 80800001 | 80900000 | 1032 | 1185 | 80850000 | -0.27182 | 6.14E-05    |
| chr17 | 80850001 | 80950000 | 986  | 1110 | 80900000 | -0.24327 | 0.000289606 |
| chr17 | 80900001 | 81000000 | 898  | 947  | 80950000 | -0.14902 | 0.017257618 |
| chr17 | 81000001 | 81100000 | 1067 | 1122 | 81050000 | -0.14488 | 0.019915549 |
| chr17 | 81050001 | 81150000 | 1046 | 1170 | 81100000 | -0.234   | 0.00046454  |
| chr17 | 81100001 | 81200000 | 550  | 604  | 81150000 | -0.20749 | 0.001647421 |
| chr17 | 81150001 | 81250000 | 36   | 30   | 81200000 | 0.190663 | 0.003540577 |
| chr21 | 9350001  | 9450000  | 193  | 212  | 9400000  | -0.20784 | 0.001621699 |

|       |          |          |      |      |          |          |             |
|-------|----------|----------|------|------|----------|----------|-------------|
| chr21 | 9450001  | 9550000  | 310  | 262  | 9500000  | 0.17033  | 0.008020399 |
| chr21 | 9600001  | 9700000  | 148  | 123  | 9650000  | 0.194567 | 0.003001206 |
| chr21 | 9700001  | 9800000  | 32   | 43   | 9750000  | -0.49864 | 1.97E-12    |
| chr21 | 9750001  | 9850000  | 2171 | 2701 | 9800000  | -0.38751 | 2.68E-08    |
| chr21 | 9800001  | 9900000  | 2497 | 3012 | 9850000  | -0.3429  | 6.94E-07    |
| chr21 | 9950001  | 10050000 | 129  | 137  | 1.00E+07 | -0.15918 | 0.011986426 |
| chr21 | 10000001 | 10100000 | 142  | 169  | 10050000 | -0.3235  | 2.57E-06    |
| chr21 | 10050001 | 10150000 | 120  | 143  | 10100000 | -0.32535 | 2.28E-06    |
| chr21 | 10100001 | 10200000 | 72   | 60   | 10150000 | 0.190663 | 0.003540577 |
| chr21 | 10150001 | 10250000 | 27   | 28   | 10200000 | -0.12484 | 0.038217021 |
| chr21 | 10200001 | 10300000 | 5    | 9    | 10250000 | -0.92037 | 2.34E-34    |
| chr21 | 10300001 | 10400000 | 68   | 56   | 10350000 | 0.207736 | 0.00168529  |
| chr21 | 10450001 | 10550000 | 153  | 114  | 10500000 | 0.352126 | 4.24E-07    |
| chr21 | 10500001 | 10600000 | 208  | 158  | 10550000 | 0.324287 | 2.76E-06    |
| chr21 | 10550001 | 10650000 | 237  | 190  | 10600000 | 0.246516 | 0.000258456 |
| chr21 | 10600001 | 10700000 | 256  | 220  | 10650000 | 0.146269 | 0.019234364 |
| chr21 | 10700001 | 10800000 | 3683 | 3904 | 10750000 | -0.15644 | 0.013245452 |
| chr21 | 10750001 | 10850000 | 3187 | 4088 | 10800000 | -0.43157 | 7.77E-10    |
| chr21 | 10800001 | 10900000 | 2140 | 2710 | 10850000 | -0.41305 | 3.57E-09    |
| chr21 | 10950001 | 11050000 | 636  | 663  | 1.10E+07 | -0.13235 | 0.03017875  |
| chr21 | 11150001 | 11250000 | 867  | 740  | 11200000 | 0.156135 | 0.013601241 |
| chr21 | 14400001 | 14500000 | 61   | 42   | 14450000 | 0.466048 | 5.49E-11    |
| chr21 | 14450001 | 14550000 | 32   | 26   | 14500000 | 0.227189 | 0.000679876 |
| chr21 | 14500001 | 14600000 | 43   | 31   | 14550000 | 0.399697 | 1.29E-08    |
| chr21 | 14550001 | 14650000 | 96   | 65   | 14600000 | 0.490223 | 6.39E-12    |
| chr21 | 14600001 | 14700000 | 130  | 104  | 14650000 | 0.249556 | 0.000220671 |
| chr21 | 14650001 | 14750000 | 99   | 106  | 14700000 | -0.17094 | 0.007682756 |
| chr21 | 14750001 | 14850000 | 146  | 96   | 14800000 | 0.53249  | 1.22E-13    |
| chr21 | 14800001 | 14900000 | 113  | 94   | 14850000 | 0.193218 | 0.003178495 |
| chr21 | 14900001 | 15000000 | 95   | 81   | 14950000 | 0.157634 | 0.012884707 |
| chr21 | 14950001 | 15050000 | 82   | 71   | 1.50E+07 | 0.135433 | 0.027602667 |
| chr21 | 15100001 | 15200000 | 133  | 146  | 15150000 | -0.20691 | 0.001690915 |
| chr21 | 15150001 | 15250000 | 158  | 183  | 15200000 | -0.28429 | 2.98E-05    |
| chr21 | 15200001 | 15300000 | 138  | 153  | 15250000 | -0.22124 | 0.000867989 |
| chr21 | 15300001 | 15400000 | 148  | 162  | 15350000 | -0.20277 | 0.002036956 |
| chr21 | 15350001 | 15450000 | 385  | 404  | 15400000 | -0.14187 | 0.022066055 |
| chr21 | 16050001 | 16150000 | 1074 | 926  | 16100000 | 0.141538 | 0.02257581  |
| chr21 | 16100001 | 16200000 | 1007 | 811  | 16150000 | 0.239918 | 0.000362196 |
| chr21 | 16150001 | 16250000 | 956  | 809  | 16200000 | 0.168499 | 0.008602617 |
| chr21 | 16200001 | 16300000 | 1049 | 896  | 16250000 | 0.155072 | 0.01412993  |
| chr21 | 16250001 | 16350000 | 968  | 792  | 16300000 | 0.217135 | 0.001095891 |
| chr21 | 16300001 | 16400000 | 983  | 829  | 16350000 | 0.173448 | 0.007108414 |
| chr21 | 16500001 | 16600000 | 1040 | 905  | 16550000 | 0.128222 | 0.034713544 |
| chr21 | 17050001 | 17150000 | 1060 | 892  | 17100000 | 0.176577 | 0.006286629 |
| chr21 | 17100001 | 17200000 | 1071 | 930  | 17150000 | 0.131284 | 0.031528278 |
| chr21 | 17150001 | 17250000 | 1054 | 894  | 17200000 | 0.165156 | 0.009762387 |
| chr21 | 17200001 | 17300000 | 964  | 836  | 17250000 | 0.133158 | 0.029700954 |

|       |          |          |      |     |          |          |             |
|-------|----------|----------|------|-----|----------|----------|-------------|
| chr21 | 17250001 | 17350000 | 919  | 798 | 17300000 | 0.131304 | 0.031508042 |
| chr21 | 17550001 | 17650000 | 995  | 863 | 17600000 | 0.132964 | 0.029886127 |
| chr21 | 17600001 | 17700000 | 1036 | 880 | 17650000 | 0.163077 | 0.010551144 |
| chr21 | 17650001 | 17750000 | 1082 | 924 | 17700000 | 0.155364 | 0.013983066 |
| chr21 | 17700001 | 17800000 | 965  | 839 | 17750000 | 0.129486 | 0.033367587 |
| chr21 | 18050001 | 18150000 | 957  | 832 | 18100000 | 0.129564 | 0.03328675  |
| chr21 | 18100001 | 18200000 | 976  | 796 | 18150000 | 0.221741 | 0.000882521 |
| chr21 | 18150001 | 18250000 | 1039 | 899 | 18200000 | 0.136431 | 0.026722213 |
| chr21 | 18300001 | 18400000 | 1021 | 854 | 18350000 | 0.185303 | 0.004423024 |
| chr21 | 18350001 | 18450000 | 1007 | 846 | 18400000 | 0.178962 | 0.00571805  |
| chr21 | 18600001 | 18700000 | 717  | 756 | 18650000 | -0.14878 | 0.017400563 |
| chr21 | 18650001 | 18750000 | 704  | 732 | 18700000 | -0.12864 | 0.033956101 |
| chr21 | 19750001 | 19850000 | 932  | 802 | 19800000 | 0.144356 | 0.020530807 |
| chr21 | 19800001 | 19900000 | 901  | 771 | 19850000 | 0.152424 | 0.015525127 |
| chr21 | 19850001 | 19950000 | 944  | 822 | 19900000 | 0.127277 | 0.035748947 |
| chr21 | 19900001 | 20000000 | 1011 | 875 | 19950000 | 0.136056 | 0.027049939 |
| chr21 | 19950001 | 20050000 | 1079 | 923 | 2.00E+07 | 0.152921 | 0.015255048 |
| chr21 | 20100001 | 20200000 | 969  | 826 | 20150000 | 0.157983 | 0.012722521 |
| chr21 | 20300001 | 20400000 | 1031 | 892 | 20350000 | 0.136557 | 0.026612645 |
| chr21 | 20450001 | 20550000 | 965  | 801 | 20500000 | 0.196355 | 0.002779988 |
| chr21 | 20700001 | 20800000 | 987  | 811 | 20750000 | 0.210976 | 0.001455438 |
| chr21 | 20750001 | 20850000 | 1040 | 876 | 20800000 | 0.175209 | 0.006634856 |
| chr21 | 20900001 | 21000000 | 1045 | 873 | 20950000 | 0.187078 | 0.004111137 |
| chr21 | 20950001 | 21050000 | 1022 | 823 | 2.10E+07 | 0.240059 | 0.000359622 |
| chr21 | 21000001 | 21100000 | 1018 | 804 | 21050000 | 0.268098 | 8.13E-05    |
| chr21 | 21050001 | 21150000 | 1003 | 815 | 21100000 | 0.227078 | 0.000683523 |
| chr21 | 21350001 | 21450000 | 1012 | 854 | 21400000 | 0.17253  | 0.007366886 |
| chr21 | 21400001 | 21500000 | 1013 | 821 | 21450000 | 0.230808 | 0.000570042 |
| chr21 | 21850001 | 21950000 | 974  | 843 | 21900000 | 0.136017 | 0.027084197 |
| chr21 | 21900001 | 22000000 | 966  | 839 | 21950000 | 0.130981 | 0.031832742 |
| chr21 | 22450001 | 22550000 | 1009 | 884 | 22500000 | 0.118436 | 0.046711968 |
| chr21 | 22500001 | 22600000 | 1027 | 866 | 22550000 | 0.173625 | 0.007059253 |
| chr21 | 22550001 | 22650000 | 999  | 866 | 22600000 | 0.133746 | 0.029146726 |
| chr21 | 22600001 | 22700000 | 1019 | 881 | 22650000 | 0.137568 | 0.02574728  |
| chr21 | 22650001 | 22750000 | 1018 | 890 | 22700000 | 0.121489 | 0.042655182 |
| chr21 | 22700001 | 22800000 | 1022 | 834 | 22750000 | 0.220904 | 0.000918183 |
| chr21 | 22750001 | 22850000 | 1036 | 801 | 22800000 | 0.298778 | 1.37E-05    |
| chr21 | 22800001 | 22900000 | 999  | 824 | 22850000 | 0.205469 | 0.001865376 |
| chr21 | 22950001 | 23050000 | 1043 | 864 | 2.30E+07 | 0.199264 | 0.002451401 |
| chr21 | 23000001 | 23100000 | 952  | 803 | 23050000 | 0.17319  | 0.007180157 |
| chr21 | 23050001 | 23150000 | 1030 | 854 | 23100000 | 0.197965 | 0.002593562 |
| chr21 | 23100001 | 23200000 | 1084 | 914 | 23150000 | 0.173727 | 0.007031364 |
| chr21 | 23300001 | 23400000 | 984  | 833 | 23350000 | 0.16797  | 0.008777693 |
| chr21 | 23350001 | 23450000 | 958  | 828 | 23400000 | 0.138023 | 0.025365958 |
| chr21 | 23400001 | 23500000 | 1018 | 883 | 23450000 | 0.13288  | 0.029966262 |
| chr21 | 23550001 | 23650000 | 1027 | 901 | 23600000 | 0.116465 | 0.049492323 |
| chr21 | 23650001 | 23750000 | 967  | 828 | 23700000 | 0.151513 | 0.016031921 |

|       |          |          |      |     |          |          |             |
|-------|----------|----------|------|-----|----------|----------|-------------|
| chr21 | 23700001 | 23800000 | 957  | 828 | 23750000 | 0.136516 | 0.026647851 |
| chr21 | 23850001 | 23950000 | 891  | 764 | 23900000 | 0.149481 | 0.017213857 |
| chr21 | 23900001 | 24000000 | 933  | 799 | 23950000 | 0.15131  | 0.016147063 |
| chr21 | 24200001 | 24300000 | 940  | 805 | 24250000 | 0.1513   | 0.016152514 |
| chr21 | 24250001 | 24350000 | 947  | 781 | 24300000 | 0.20567  | 0.001848687 |
| chr21 | 24300001 | 24400000 | 998  | 817 | 24350000 | 0.216332 | 0.001137615 |
| chr21 | 24350001 | 24450000 | 994  | 838 | 24400000 | 0.173924 | 0.006977499 |
| chr21 | 24400001 | 24500000 | 1036 | 900 | 24450000 | 0.130655 | 0.03216178  |
| chr21 | 24650001 | 24750000 | 967  | 822 | 24700000 | 0.162006 | 0.010978724 |
| chr21 | 24700001 | 24800000 | 997  | 798 | 24750000 | 0.248833 | 0.00022916  |
| chr21 | 24750001 | 24850000 | 1036 | 823 | 24800000 | 0.259688 | 0.000128826 |
| chr21 | 24800001 | 24900000 | 1030 | 853 | 24850000 | 0.199655 | 0.002410061 |
| chr21 | 24850001 | 24950000 | 997  | 851 | 24900000 | 0.156063 | 0.013636684 |
| chr21 | 24900001 | 25000000 | 1002 | 842 | 24950000 | 0.178619 | 0.005797051 |
| chr21 | 24950001 | 25050000 | 978  | 853 | 2.50E+07 | 0.124917 | 0.038444608 |
| chr21 | 25000001 | 25100000 | 1010 | 851 | 25050000 | 0.174752 | 0.006754818 |
| chr21 | 25050001 | 25150000 | 1001 | 833 | 25100000 | 0.192682 | 0.003251611 |
| chr21 | 25100001 | 25200000 | 942  | 826 | 25150000 | 0.117214 | 0.048421652 |
| chr21 | 25150001 | 25250000 | 978  | 816 | 25200000 | 0.188894 | 0.003812553 |
| chr21 | 25200001 | 25300000 | 1031 | 860 | 25250000 | 0.189264 | 0.003754092 |
| chr21 | 25350001 | 25450000 | 986  | 843 | 25400000 | 0.153683 | 0.014847702 |
| chr21 | 25400001 | 25500000 | 1034 | 879 | 25450000 | 0.161929 | 0.011009786 |
| chr21 | 25450001 | 25550000 | 1026 | 900 | 25500000 | 0.116662 | 0.049209057 |
| chr21 | 25600001 | 25700000 | 995  | 863 | 25650000 | 0.132964 | 0.029886127 |
| chr21 | 25650001 | 25750000 | 1013 | 854 | 25700000 | 0.173954 | 0.006969164 |
| chr21 | 25750001 | 25850000 | 1033 | 887 | 25800000 | 0.147462 | 0.018460965 |
| chr21 | 25800001 | 25900000 | 1067 | 843 | 25850000 | 0.267584 | 8.37E-05    |
| chr21 | 25950001 | 26050000 | 1024 | 861 | 2.60E+07 | 0.177759 | 0.005998924 |
| chr21 | 26200001 | 26300000 | 946  | 807 | 26250000 | 0.1569   | 0.013231438 |
| chr21 | 26550001 | 26650000 | 1020 | 890 | 26600000 | 0.12432  | 0.039152111 |
| chr21 | 27150001 | 27250000 | 903  | 969 | 27200000 | -0.17414 | 0.006776217 |
| chr21 | 28500001 | 28600000 | 1065 | 845 | 28550000 | 0.261458 | 0.000117049 |
| chr21 | 28550001 | 28650000 | 1120 | 860 | 28600000 | 0.308718 | 7.43E-06    |
| chr21 | 28600001 | 28700000 | 1064 | 897 | 28650000 | 0.173946 | 0.006971326 |
| chr21 | 28800001 | 28900000 | 1002 | 861 | 28850000 | 0.146426 | 0.019131061 |
| chr21 | 28850001 | 28950000 | 1006 | 858 | 28900000 | 0.157209 | 0.013084401 |
| chr21 | 28950001 | 29050000 | 1000 | 811 | 2.90E+07 | 0.229854 | 0.000597266 |
| chr21 | 29000001 | 29100000 | 1022 | 853 | 29050000 | 0.188406 | 0.003890775 |
| chr21 | 29050001 | 29150000 | 1019 | 877 | 29100000 | 0.144134 | 0.020686287 |
| chr21 | 29100001 | 29200000 | 992  | 820 | 29150000 | 0.202344 | 0.002142272 |
| chr21 | 29150001 | 29250000 | 719  | 585 | 29200000 | 0.225183 | 0.000748846 |
| chr21 | 29200001 | 29300000 | 340  | 281 | 29250000 | 0.202593 | 0.002118958 |
| chr21 | 29350001 | 29450000 | 368  | 322 | 29400000 | 0.120273 | 0.044234652 |
| chr21 | 29400001 | 29500000 | 731  | 636 | 29450000 | 0.128473 | 0.034443035 |
| chr21 | 29450001 | 29550000 | 938  | 820 | 29500000 | 0.121592 | 0.042522557 |
| chr21 | 29650001 | 29750000 | 1032 | 872 | 29700000 | 0.170671 | 0.007915704 |
| chr21 | 30200001 | 30300000 | 920  | 782 | 30250000 | 0.162093 | 0.01094313  |



|       |          |          |      |      |          |          |             |
|-------|----------|----------|------|------|----------|----------|-------------|
| chr21 | 30350001 | 30450000 | 938  | 805  | 30400000 | 0.148227 | 0.017979592 |
| chr21 | 30450001 | 30550000 | 991  | 869  | 30500000 | 0.117157 | 0.048501713 |
| chr21 | 30500001 | 30600000 | 1067 | 903  | 30550000 | 0.168391 | 0.00863831  |
| chr21 | 30600001 | 30700000 | 965  | 1033 | 30650000 | -0.17061 | 0.007780177 |
| chr21 | 31300001 | 31400000 | 1064 | 928  | 31350000 | 0.12493  | 0.038429648 |
| chr21 | 32050001 | 32150000 | 1046 | 915  | 32100000 | 0.120667 | 0.043717297 |
| chr21 | 32750001 | 32850000 | 940  | 806  | 32800000 | 0.149509 | 0.017197004 |
| chr21 | 32800001 | 32900000 | 965  | 827  | 32850000 | 0.15027  | 0.016746517 |
| chr21 | 33650001 | 33750000 | 959  | 1042 | 33700000 | -0.19212 | 0.003239621 |
| chr21 | 33700001 | 33800000 | 978  | 1016 | 33750000 | -0.12737 | 0.035338649 |
| chr21 | 33950001 | 34050000 | 873  | 915  | 3.40E+07 | -0.14016 | 0.023368017 |
| chr21 | 34100001 | 34200000 | 923  | 980  | 34150000 | -0.15882 | 0.012143276 |
| chr21 | 34800001 | 34900000 | 873  | 751  | 34850000 | 0.144797 | 0.020225441 |
| chr21 | 34850001 | 34950000 | 930  | 808  | 34900000 | 0.130504 | 0.032316166 |
| chr21 | 35000001 | 35100000 | 950  | 818  | 35050000 | 0.143455 | 0.021166888 |
| chr21 | 35050001 | 35150000 | 968  | 807  | 35100000 | 0.190067 | 0.003630192 |
| chr21 | 35550001 | 35650000 | 1128 | 967  | 35600000 | 0.149808 | 0.017019093 |
| chr21 | 35900001 | 36000000 | 998  | 1044 | 35950000 | -0.13738 | 0.025627276 |
| chr21 | 36250001 | 36350000 | 1038 | 1086 | 36300000 | -0.13759 | 0.025452402 |
| chr21 | 37900001 | 38000000 | 975  | 1044 | 37950000 | -0.17102 | 0.007657781 |
| chr21 | 38050001 | 38150000 | 1053 | 1114 | 38100000 | -0.15362 | 0.014667079 |
| chr21 | 38100001 | 38200000 | 1025 | 1082 | 38150000 | -0.15045 | 0.016413711 |
| chr21 | 38400001 | 38500000 | 903  | 792  | 38450000 | 0.116854 | 0.048934131 |
| chr21 | 38900001 | 39000000 | 944  | 980  | 38950000 | -0.12637 | 0.036454846 |
| chr21 | 38950001 | 39050000 | 950  | 1056 | 3.90E+07 | -0.22498 | 0.000724627 |
| chr21 | 39000001 | 39100000 | 956  | 1067 | 39050000 | -0.23085 | 0.000543456 |
| chr21 | 39050001 | 39150000 | 972  | 1024 | 39100000 | -0.14756 | 0.018159769 |
| chr21 | 39150001 | 39250000 | 1052 | 1086 | 39200000 | -0.11826 | 0.046617256 |
| chr21 | 39200001 | 39300000 | 1007 | 1076 | 39250000 | -0.16799 | 0.008609335 |
| chr21 | 39500001 | 39600000 | 1013 | 1047 | 39550000 | -0.12    | 0.044265398 |
| chr21 | 40100001 | 40200000 | 987  | 1076 | 40150000 | -0.19693 | 0.002634161 |
| chr21 | 40150001 | 40250000 | 1055 | 1097 | 40200000 | -0.12869 | 0.033900312 |
| chr21 | 40300001 | 40400000 | 1044 | 1164 | 40350000 | -0.22934 | 0.000585518 |
| chr21 | 40350001 | 40450000 | 999  | 1103 | 40400000 | -0.21525 | 0.001152192 |
| chr21 | 40400001 | 40500000 | 1048 | 1085 | 40450000 | -0.12243 | 0.041139756 |
| chr21 | 40800001 | 40900000 | 907  | 948  | 40850000 | -0.13616 | 0.026679885 |
| chr21 | 41100001 | 41200000 | 876  | 935  | 41150000 | -0.16641 | 0.009144652 |
| chr21 | 41150001 | 41250000 | 933  | 1090 | 41200000 | -0.29675 | 1.41E-05    |
| chr21 | 41200001 | 41300000 | 1031 | 1128 | 41250000 | -0.20209 | 0.002098943 |
| chr21 | 41350001 | 41450000 | 958  | 1025 | 41400000 | -0.1699  | 0.007998136 |
| chr21 | 41550001 | 41650000 | 1007 | 1041 | 41600000 | -0.12028 | 0.043896761 |
| chr21 | 41850001 | 41950000 | 1045 | 917  | 41900000 | 0.116138 | 0.049967497 |
| chr21 | 41950001 | 42050000 | 959  | 1002 | 4.20E+07 | -0.13565 | 0.02712381  |
| chr21 | 42000001 | 42100000 | 1009 | 1045 | 42050000 | -0.12295 | 0.040493962 |
| chr21 | 42150001 | 42250000 | 958  | 1042 | 42200000 | -0.19363 | 0.003037611 |
| chr21 | 42200001 | 42300000 | 954  | 1056 | 42250000 | -0.21892 | 0.000969174 |
| chr21 | 42350001 | 42450000 | 1037 | 1096 | 42400000 | -0.1522  | 0.015424848 |

|       |          |          |      |      |          |          |             |
|-------|----------|----------|------|------|----------|----------|-------------|
| chr21 | 42400001 | 42500000 | 968  | 1043 | 42450000 | -0.18003 | 0.005355158 |
| chr21 | 42450001 | 42550000 | 1019 | 1116 | 42500000 | -0.20355 | 0.001966737 |
| chr21 | 42500001 | 42600000 | 1002 | 1078 | 42550000 | -0.17785 | 0.005848114 |
| chr21 | 42550001 | 42650000 | 956  | 1006 | 42600000 | -0.14592 | 0.019219604 |
| chr21 | 42600001 | 42700000 | 983  | 1033 | 42650000 | -0.14395 | 0.020562788 |
| chr21 | 42700001 | 42800000 | 971  | 1009 | 42750000 | -0.12775 | 0.034911807 |
| chr21 | 42750001 | 42850000 | 961  | 1002 | 42800000 | -0.13265 | 0.029897116 |
| chr21 | 42950001 | 43050000 | 465  | 496  | 4.30E+07 | -0.16548 | 0.009472046 |
| chr21 | 43000001 | 43100000 | 974  | 1045 | 43050000 | -0.17388 | 0.006846398 |
| chr21 | 43050001 | 43150000 | 1092 | 1129 | 43100000 | -0.12044 | 0.043678379 |
| chr21 | 43200001 | 43300000 | 1030 | 1079 | 43250000 | -0.13942 | 0.023951979 |
| chr21 | 43250001 | 43350000 | 1020 | 1091 | 43300000 | -0.16945 | 0.008136681 |
| chr21 | 43350001 | 43450000 | 1064 | 1105 | 43400000 | -0.12692 | 0.035833171 |
| chr21 | 43400001 | 43500000 | 1086 | 1160 | 43450000 | -0.16747 | 0.008780394 |
| chr21 | 43450001 | 43550000 | 1127 | 1201 | 43500000 | -0.16412 | 0.009971742 |
| chr21 | 43500001 | 43600000 | 1099 | 1177 | 43550000 | -0.17129 | 0.00757618  |
| chr21 | 43550001 | 43650000 | 1036 | 1103 | 43600000 | -0.16278 | 0.010486144 |
| chr21 | 43600001 | 43700000 | 1011 | 1139 | 43650000 | -0.24436 | 0.000273762 |
| chr21 | 43650001 | 43750000 | 1015 | 1132 | 43700000 | -0.22977 | 0.000573374 |
| chr21 | 43800001 | 43900000 | 1032 | 1102 | 43850000 | -0.16705 | 0.008922278 |
| chr21 | 43850001 | 43950000 | 1010 | 1134 | 43900000 | -0.23944 | 0.00035275  |
| chr21 | 43900001 | 44000000 | 1091 | 1178 | 43950000 | -0.18306 | 0.004733339 |
| chr21 | 44000001 | 44100000 | 1008 | 1089 | 44050000 | -0.18388 | 0.004576551 |
| chr21 | 44050001 | 44150000 | 1011 | 1075 | 44100000 | -0.16093 | 0.011236571 |
| chr21 | 44200001 | 44300000 | 865  | 939  | 44250000 | -0.1908  | 0.003427763 |
| chr21 | 44250001 | 44350000 | 821  | 918  | 44300000 | -0.23348 | 0.000476646 |
| chr21 | 44300001 | 44400000 | 640  | 716  | 44350000 | -0.23426 | 0.000458477 |
| chr21 | 44450001 | 44550000 | 892  | 993  | 44500000 | -0.22712 | 0.000652918 |
| chr21 | 44500001 | 44600000 | 942  | 1008 | 44550000 | -0.17007 | 0.007945589 |
| chr21 | 44550001 | 44650000 | 888  | 941  | 44600000 | -0.15601 | 0.013456836 |
| chr21 | 44600001 | 44700000 | 554  | 576  | 44650000 | -0.12855 | 0.034047331 |
| chr21 | 44650001 | 44750000 | 743  | 776  | 44700000 | -0.13507 | 0.027646369 |
| chr21 | 44700001 | 44800000 | 1131 | 1255 | 44750000 | -0.22246 | 0.000818469 |
| chr21 | 44750001 | 44850000 | 1172 | 1451 | 44800000 | -0.38045 | 4.58E-08    |
| chr21 | 44800001 | 44900000 | 1113 | 1381 | 44850000 | -0.38363 | 3.60E-08    |
| chr21 | 44850001 | 44950000 | 982  | 1195 | 44900000 | -0.35559 | 2.85E-07    |
| chr21 | 44900001 | 45000000 | 942  | 1069 | 44950000 | -0.25483 | 0.000157267 |
| chr21 | 44950001 | 45050000 | 953  | 984  | 4.50E+07 | -0.11855 | 0.046214249 |
| chr21 | 45000001 | 45100000 | 925  | 989  | 45050000 | -0.16889 | 0.008315808 |
| chr21 | 45050001 | 45150000 | 907  | 962  | 45100000 | -0.15731 | 0.012836225 |
| chr21 | 45100001 | 45200000 | 976  | 1017 | 45150000 | -0.13174 | 0.030779462 |
| chr21 | 45150001 | 45250000 | 1010 | 1109 | 45200000 | -0.20728 | 0.001663406 |
| chr21 | 45200001 | 45300000 | 944  | 1040 | 45250000 | -0.2121  | 0.001333999 |
| chr21 | 45250001 | 45350000 | 943  | 985  | 45300000 | -0.13524 | 0.027492391 |
| chr21 | 45300001 | 45400000 | 973  | 1144 | 45350000 | -0.30595 | 7.97E-06    |
| chr21 | 45350001 | 45450000 | 936  | 1166 | 45400000 | -0.38936 | 2.32E-08    |
| chr21 | 45400001 | 45500000 | 927  | 1037 | 45450000 | -0.23415 | 0.000461083 |

|       |          |          |      |      |          |          |             |
|-------|----------|----------|------|------|----------|----------|-------------|
| chr21 | 45500001 | 45600000 | 1067 | 1108 | 45550000 | -0.12677 | 0.036001408 |
| chr21 | 45550001 | 45650000 | 1079 | 1202 | 45600000 | -0.22811 | 0.000621949 |
| chr21 | 45600001 | 45700000 | 992  | 1139 | 45650000 | -0.27173 | 6.18E-05    |
| chr21 | 45650001 | 45750000 | 976  | 1241 | 45700000 | -0.41892 | 2.22E-09    |
| chr21 | 45700001 | 45800000 | 979  | 1220 | 45750000 | -0.38987 | 2.23E-08    |
| chr21 | 45750001 | 45850000 | 933  | 1004 | 45800000 | -0.17818 | 0.005769884 |
| chr21 | 45800001 | 45900000 | 960  | 1095 | 45850000 | -0.2622  | 0.000105302 |
| chr21 | 45850001 | 45950000 | 988  | 1192 | 45900000 | -0.34317 | 6.81E-07    |
| chr21 | 45900001 | 46000000 | 951  | 1074 | 45950000 | -0.24785 | 0.00022808  |
| chr21 | 45950001 | 46050000 | 905  | 1005 | 4.60E+07 | -0.22358 | 0.000775588 |
| chr21 | 46000001 | 46100000 | 909  | 1009 | 46050000 | -0.22295 | 0.000799574 |
| chr21 | 46050001 | 46150000 | 946  | 1014 | 46100000 | -0.17252 | 0.007223043 |
| chr21 | 46100001 | 46200000 | 1004 | 1095 | 46150000 | -0.19754 | 0.002564481 |
| chr21 | 46150001 | 46250000 | 1043 | 1105 | 46200000 | -0.15568 | 0.013617469 |
| chr21 | 46250001 | 46350000 | 987  | 1099 | 46300000 | -0.22744 | 0.000642795 |
| chr21 | 46300001 | 46400000 | 1008 | 1232 | 46350000 | -0.36188 | 1.81E-07    |
| chr21 | 46350001 | 46450000 | 1004 | 1269 | 46400000 | -0.4103  | 4.46E-09    |
| chr21 | 46400001 | 46500000 | 1051 | 1223 | 46450000 | -0.29103 | 1.99E-05    |
| chr21 | 46450001 | 46550000 | 1056 | 1145 | 46500000 | -0.18911 | 0.003681067 |
| chr21 | 46500001 | 46600000 | 1059 | 1168 | 46550000 | -0.21371 | 0.001237899 |
| chr21 | 46650001 | 46750000 | 979  | 1129 | 46700000 | -0.27804 | 4.30E-05    |
| chr21 | 46700001 | 46800000 | 1039 | 1219 | 46750000 | -0.30287 | 9.66E-06    |
| chr21 | 46750001 | 46850000 | 1058 | 1215 | 46800000 | -0.27199 | 6.08E-05    |
| chr21 | 46800001 | 46900000 | 1077 | 1317 | 46850000 | -0.36261 | 1.72E-07    |
| chr21 | 46850001 | 46950000 | 1071 | 1378 | 46900000 | -0.43599 | 5.35E-10    |
| chr21 | 46900001 | 47000000 | 1031 | 1289 | 46950000 | -0.39458 | 1.55E-08    |
| chr21 | 46950001 | 47050000 | 997  | 1158 | 4.70E+07 | -0.28834 | 2.34E-05    |
| chr21 | 47000001 | 47100000 | 952  | 1050 | 47050000 | -0.21373 | 0.001236854 |
| chr21 | 47300001 | 47400000 | 1005 | 1057 | 47350000 | -0.14515 | 0.01973379  |
| chr21 | 47350001 | 47450000 | 1012 | 1167 | 47400000 | -0.27797 | 4.32E-05    |
| chr21 | 47400001 | 47500000 | 1050 | 1162 | 47450000 | -0.21859 | 0.000984356 |
| chr21 | 47450001 | 47550000 | 1015 | 1143 | 47500000 | -0.24372 | 0.000282997 |
| chr21 | 47500001 | 47600000 | 1003 | 1189 | 47550000 | -0.3178  | 3.74E-06    |
| chr21 | 47550001 | 47650000 | 1017 | 1080 | 47600000 | -0.15908 | 0.012027579 |
| chr21 | 47700001 | 47800000 | 880  | 967  | 47750000 | -0.20838 | 0.001581697 |
| chr21 | 47750001 | 47850000 | 902  | 974  | 47800000 | -0.18317 | 0.004712865 |
| chr21 | 47900001 | 48000000 | 971  | 1007 | 47950000 | -0.12489 | 0.038154658 |
| chr21 | 48100001 | 48200000 | 4    | 1    | 48150000 | 1.927628 | 4.39E-93    |
| chr16 | 1        | 100000   | 120  | 141  | 50000    | -0.30503 | 8.44E-06    |
| chr16 | 50001    | 150000   | 599  | 741  | 1.00E+05 | -0.37929 | 5.00E-08    |
| chr16 | 100001   | 200000   | 921  | 1077 | 150000   | -0.29812 | 1.30E-05    |
| chr16 | 150001   | 250000   | 809  | 909  | 2.00E+05 | -0.24051 | 0.00033386  |
| chr16 | 200001   | 300000   | 740  | 807  | 250000   | -0.19742 | 0.002578855 |
| chr16 | 250001   | 350000   | 825  | 883  | 3.00E+05 | -0.17039 | 0.007846885 |
| chr16 | 300001   | 400000   | 939  | 998  | 350000   | -0.16029 | 0.011505682 |
| chr16 | 350001   | 450000   | 942  | 1079 | 4.00E+05 | -0.26827 | 7.51E-05    |
| chr16 | 400001   | 500000   | 814  | 1004 | 450000   | -0.37503 | 6.88E-08    |

|       |         |         |      |      |          |          |             |
|-------|---------|---------|------|------|----------|----------|-------------|
| chr16 | 450001  | 550000  | 784  | 815  | 5.00E+05 | -0.12832 | 0.034301005 |
| chr16 | 500001  | 600000  | 899  | 949  | 550000   | -0.15046 | 0.016407706 |
| chr16 | 550001  | 650000  | 981  | 1244 | 6.00E+05 | -0.41503 | 3.04E-09    |
| chr16 | 600001  | 700000  | 975  | 1287 | 650000   | -0.47291 | 2.12E-11    |
| chr16 | 650001  | 750000  | 1009 | 1318 | 7.00E+05 | -0.4578  | 8.15E-11    |
| chr16 | 700001  | 800000  | 991  | 1364 | 750000   | -0.53326 | 6.93E-14    |
| chr16 | 750001  | 850000  | 931  | 1275 | 8.00E+05 | -0.52602 | 1.42E-13    |
| chr16 | 800001  | 900000  | 1015 | 1192 | 850000   | -0.30428 | 8.85E-06    |
| chr16 | 850001  | 950000  | 1023 | 1175 | 9.00E+05 | -0.27223 | 6.00E-05    |
| chr16 | 900001  | 1000000 | 1003 | 1131 | 950000   | -0.24565 | 0.000255939 |
| chr16 | 950001  | 1050000 | 1045 | 1113 | 1.00E+06 | -0.16332 | 0.010275382 |
| chr16 | 1000001 | 1100000 | 1055 | 1287 | 1050000  | -0.35914 | 2.21E-07    |
| chr16 | 1050001 | 1150000 | 1031 | 1333 | 1100000  | -0.443   | 2.95E-10    |
| chr16 | 1100001 | 1200000 | 1087 | 1355 | 1150000  | -0.39031 | 2.16E-08    |
| chr16 | 1150001 | 1250000 | 1171 | 1420 | 1200000  | -0.35052 | 4.08E-07    |
| chr16 | 1200001 | 1300000 | 934  | 1183 | 1250000  | -0.41333 | 3.49E-09    |
| chr16 | 1250001 | 1350000 | 749  | 966  | 1300000  | -0.43943 | 4.00E-10    |
| chr16 | 1300001 | 1400000 | 950  | 1145 | 1350000  | -0.34172 | 7.53E-07    |
| chr16 | 1350001 | 1450000 | 1014 | 1190 | 1400000  | -0.30328 | 9.42E-06    |
| chr16 | 1400001 | 1500000 | 884  | 1078 | 1450000  | -0.35861 | 2.29E-07    |
| chr16 | 1450001 | 1550000 | 925  | 1084 | 1500000  | -0.30121 | 1.07E-05    |
| chr16 | 1500001 | 1600000 | 1031 | 1187 | 1550000  | -0.27565 | 4.94E-05    |
| chr16 | 1550001 | 1650000 | 984  | 1132 | 1600000  | -0.27452 | 5.27E-05    |
| chr16 | 1600001 | 1700000 | 982  | 1043 | 1650000  | -0.15932 | 0.011925099 |
| chr16 | 1700001 | 1800000 | 1004 | 1079 | 1750000  | -0.17631 | 0.006219075 |
| chr16 | 1750001 | 1850000 | 918  | 1162 | 1800000  | -0.41242 | 3.76E-09    |
| chr16 | 1800001 | 1900000 | 875  | 1088 | 1850000  | -0.3867  | 2.85E-08    |
| chr16 | 1900001 | 2000000 | 868  | 900  | 1950000  | -0.1246  | 0.038497122 |
| chr16 | 1950001 | 2050000 | 940  | 1104 | 2.00E+06 | -0.30438 | 8.79E-06    |
| chr16 | 2000001 | 2100000 | 940  | 1160 | 2050000  | -0.37576 | 6.51E-08    |
| chr16 | 2050001 | 2150000 | 939  | 1210 | 2100000  | -0.43818 | 4.45E-10    |
| chr16 | 2100001 | 2200000 | 632  | 808  | 2150000  | -0.4268  | 1.16E-09    |
| chr16 | 2150001 | 2250000 | 686  | 868  | 2200000  | -0.41186 | 3.93E-09    |
| chr16 | 2200001 | 2300000 | 981  | 1268 | 2250000  | -0.4426  | 3.05E-10    |
| chr16 | 2250001 | 2350000 | 882  | 1080 | 2300000  | -0.36455 | 1.49E-07    |
| chr16 | 2300001 | 2400000 | 873  | 913  | 2350000  | -0.137   | 0.025947134 |
| chr16 | 2450001 | 2550000 | 918  | 1043 | 2500000  | -0.25654 | 0.000143398 |
| chr16 | 2500001 | 2600000 | 933  | 1044 | 2550000  | -0.23454 | 0.000451964 |
| chr16 | 2600001 | 2700000 | 213  | 266  | 2650000  | -0.39294 | 1.76E-08    |
| chr16 | 2650001 | 2750000 | 319  | 406  | 2700000  | -0.4203  | 1.98E-09    |
| chr16 | 2700001 | 2800000 | 741  | 899  | 2750000  | -0.35122 | 3.88E-07    |
| chr16 | 2750001 | 2850000 | 982  | 1171 | 2800000  | -0.32632 | 2.14E-06    |
| chr16 | 2800001 | 2900000 | 1032 | 1151 | 2850000  | -0.22982 | 0.000571943 |
| chr16 | 2850001 | 2950000 | 919  | 1007 | 2900000  | -0.2043  | 0.00190234  |
| chr16 | 2900001 | 3000000 | 732  | 820  | 2950000  | -0.23615 | 0.000416815 |
| chr16 | 2950001 | 3050000 | 881  | 950  | 3.00E+06 | -0.18116 | 0.00511608  |
| chr16 | 3000001 | 3100000 | 1040 | 1087 | 3050000  | -0.13614 | 0.026693948 |

|       |          |          |      |      |          |          |             |
|-------|----------|----------|------|------|----------|----------|-------------|
| chr16 | 3050001  | 3150000  | 914  | 954  | 3100000  | -0.13417 | 0.028465613 |
| chr16 | 3100001  | 3200000  | 872  | 973  | 3150000  | -0.23048 | 0.000553397 |
| chr16 | 3150001  | 3250000  | 910  | 1031 | 3200000  | -0.25248 | 0.000178456 |
| chr16 | 3200001  | 3300000  | 907  | 938  | 3250000  | -0.12086 | 0.04313999  |
| chr16 | 3850001  | 3950000  | 926  | 956  | 3900000  | -0.11837 | 0.046466815 |
| chr16 | 4000001  | 4100000  | 867  | 926  | 4050000  | -0.16735 | 0.008820951 |
| chr16 | 4300001  | 4400000  | 940  | 1047 | 4350000  | -0.2279  | 0.000628489 |
| chr16 | 4350001  | 4450000  | 1014 | 1263 | 4400000  | -0.38917 | 2.35E-08    |
| chr16 | 4400001  | 4500000  | 908  | 1107 | 4450000  | -0.35826 | 2.35E-07    |
| chr16 | 4450001  | 4550000  | 821  | 857  | 4500000  | -0.13428 | 0.028357091 |
| chr16 | 4550001  | 4650000  | 890  | 942  | 4600000  | -0.15429 | 0.014314788 |
| chr16 | 4600001  | 4700000  | 853  | 953  | 4650000  | -0.2323  | 0.000505606 |
| chr16 | 4650001  | 4750000  | 1005 | 1173 | 4700000  | -0.29538 | 1.53E-05    |
| chr16 | 4700001  | 4800000  | 1023 | 1113 | 4750000  | -0.19402 | 0.002987193 |
| chr16 | 4750001  | 4850000  | 864  | 918  | 4800000  | -0.15983 | 0.011699331 |
| chr16 | 4800001  | 4900000  | 861  | 912  | 4850000  | -0.15539 | 0.013759268 |
| chr16 | 4900001  | 5000000  | 971  | 1022 | 4950000  | -0.14622 | 0.019019084 |
| chr16 | 4950001  | 5050000  | 877  | 959  | 5.00E+06 | -0.20133 | 0.002171746 |
| chr16 | 5000001  | 5100000  | 907  | 945  | 5050000  | -0.13158 | 0.030932147 |
| chr16 | 6450001  | 6550000  | 949  | 992  | 6500000  | -0.1363  | 0.026551285 |
| chr16 | 6500001  | 6600000  | 971  | 1051 | 6550000  | -0.18659 | 0.004090502 |
| chr16 | 6700001  | 6800000  | 1046 | 895  | 6750000  | 0.152551 | 0.015455584 |
| chr16 | 7550001  | 7650000  | 973  | 1030 | 7600000  | -0.1545  | 0.01420669  |
| chr16 | 8850001  | 8950000  | 833  | 876  | 8900000  | -0.14499 | 0.019846128 |
| chr16 | 9550001  | 9650000  | 960  | 1040 | 9600000  | -0.18785 | 0.003881164 |
| chr16 | 10250001 | 10350000 | 934  | 1034 | 10300000 | -0.21911 | 0.000960336 |
| chr16 | 10300001 | 10400000 | 781  | 831  | 10350000 | -0.1619  | 0.010837633 |
| chr16 | 10950001 | 11050000 | 963  | 1034 | 1.10E+07 | -0.175   | 0.00655038  |
| chr16 | 11000001 | 11100000 | 996  | 1051 | 11050000 | -0.14992 | 0.016723706 |
| chr16 | 11150001 | 11250000 | 1075 | 1109 | 11200000 | -0.11729 | 0.047968363 |
| chr16 | 11200001 | 11300000 | 1046 | 1086 | 11250000 | -0.12651 | 0.036289552 |
| chr16 | 11250001 | 11350000 | 947  | 1013 | 11300000 | -0.16957 | 0.008100348 |
| chr16 | 11500001 | 11600000 | 963  | 1008 | 11550000 | -0.13826 | 0.024894794 |
| chr16 | 11600001 | 11700000 | 901  | 945  | 11650000 | -0.14116 | 0.022599725 |
| chr16 | 11650001 | 11750000 | 853  | 896  | 11700000 | -0.14332 | 0.021004297 |
| chr16 | 11950001 | 12050000 | 698  | 610  | 1.20E+07 | 0.122046 | 0.041946096 |
| chr16 | 12000001 | 12100000 | 730  | 632  | 12050000 | 0.1356   | 0.027453612 |
| chr16 | 12050001 | 12150000 | 784  | 635  | 12100000 | 0.231725 | 0.000544959 |
| chr16 | 12450001 | 12550000 | 942  | 1032 | 12500000 | -0.20402 | 0.001926599 |
| chr16 | 12500001 | 12600000 | 957  | 1053 | 12550000 | -0.21029 | 0.001449959 |
| chr16 | 12550001 | 12650000 | 1011 | 1065 | 12600000 | -0.14744 | 0.018233742 |
| chr16 | 12600001 | 12700000 | 980  | 1026 | 12650000 | -0.13855 | 0.024657445 |
| chr16 | 13150001 | 13250000 | 995  | 1028 | 13200000 | -0.11944 | 0.045006415 |
| chr16 | 13250001 | 13350000 | 969  | 1021 | 13300000 | -0.14779 | 0.018017182 |
| chr16 | 13800001 | 13900000 | 971  | 1051 | 13850000 | -0.18659 | 0.004090502 |
| chr16 | 13850001 | 13950000 | 1013 | 1050 | 13900000 | -0.12413 | 0.039062215 |
| chr16 | 14800001 | 14900000 | 7    | 6    | 14850000 | 0.150021 | 0.016892961 |

|       |          |          |      |      |          |          |             |
|-------|----------|----------|------|------|----------|----------|-------------|
| chr16 | 14850001 | 14950000 | 21   | 17   | 14900000 | 0.232483 | 0.000525015 |
| chr16 | 14900001 | 15000000 | 24   | 32   | 14950000 | -0.48741 | 5.63E-12    |
| chr16 | 14950001 | 15050000 | 33   | 48   | 1.50E+07 | -0.61294 | 1.65E-17    |
| chr16 | 15050001 | 15150000 | 464  | 485  | 15100000 | -0.13623 | 0.026614063 |
| chr16 | 15100001 | 15200000 | 437  | 473  | 15150000 | -0.18658 | 0.004092643 |
| chr16 | 15150001 | 15250000 | 177  | 196  | 15200000 | -0.21948 | 0.000943941 |
| chr16 | 15200001 | 15300000 | 50   | 59   | 15250000 | -0.31116 | 5.73E-06    |
| chr16 | 15300001 | 15400000 | 18   | 13   | 15350000 | 0.397114 | 1.57E-08    |
| chr16 | 15350001 | 15450000 | 18   | 14   | 15400000 | 0.290198 | 2.29E-05    |
| chr16 | 15400001 | 15500000 | 103  | 86   | 15450000 | 0.187864 | 0.003979348 |
| chr16 | 16200001 | 16300000 | 847  | 898  | 16250000 | -0.15673 | 0.013110542 |
| chr16 | 16250001 | 16350000 | 411  | 427  | 16300000 | -0.12747 | 0.035224489 |
| chr16 | 16350001 | 16450000 | 6    | 8    | 16400000 | -0.48741 | 5.63E-12    |
| chr16 | 16400001 | 16500000 | 2    | 4    | 16450000 | -1.07237 | 8.26E-44    |
| chr16 | 16450001 | 16550000 | 13   | 14   | 16500000 | -0.17929 | 0.00551887  |
| chr16 | 16500001 | 16600000 | 32   | 28   | 16550000 | 0.120273 | 0.044234652 |
| chr16 | 16550001 | 16650000 | 38   | 41   | 16600000 | -0.182   | 0.004944075 |
| chr16 | 16600001 | 16700000 | 51   | 67   | 16650000 | -0.46604 | 3.93E-11    |
| chr16 | 16750001 | 16850000 | 10   | 20   | 16800000 | -1.07237 | 8.26E-44    |
| chr16 | 16800001 | 16900000 | 392  | 411  | 16850000 | -0.14066 | 0.022984179 |
| chr16 | 18200001 | 18300000 | 52   | 60   | 18250000 | -0.27882 | 4.11E-05    |
| chr16 | 18250001 | 18350000 | 47   | 51   | 18300000 | -0.19021 | 0.003514278 |
| chr16 | 18300001 | 18400000 | 17   | 20   | 18350000 | -0.30684 | 7.53E-06    |
| chr16 | 18350001 | 18450000 | 6    | 8    | 18400000 | -0.48741 | 5.63E-12    |
| chr16 | 18400001 | 18500000 | 2    | 6    | 18450000 | -1.65733 | 2.87E-81    |
| chr16 | 18450001 | 18550000 | 4    | 10   | 18500000 | -1.3943  | 1.23E-64    |
| chr16 | 18500001 | 18600000 | 23   | 33   | 18550000 | -0.5932  | 1.41E-16    |
| chr16 | 18700001 | 18800000 | 124  | 104  | 18750000 | 0.181385 | 0.00518798  |
| chr16 | 18750001 | 18850000 | 511  | 443  | 18800000 | 0.133645 | 0.029241453 |
| chr16 | 18850001 | 18950000 | 342  | 362  | 18900000 | -0.15437 | 0.014277985 |
| chr16 | 19200001 | 19300000 | 1052 | 912  | 19250000 | 0.133657 | 0.029229832 |
| chr16 | 19500001 | 19600000 | 904  | 790  | 19550000 | 0.122098 | 0.041880034 |
| chr16 | 20300001 | 20400000 | 981  | 1020 | 20350000 | -0.12862 | 0.03398184  |
| chr16 | 20350001 | 20450000 | 848  | 908  | 20400000 | -0.171   | 0.007663606 |
| chr16 | 20400001 | 20500000 | 429  | 462  | 20450000 | -0.17929 | 0.00551887  |
| chr16 | 21350001 | 21450000 | 52   | 64   | 21400000 | -0.37193 | 8.66E-08    |
| chr16 | 21400001 | 21500000 | 8    | 7    | 21450000 | 0.120273 | 0.044234652 |
| chr16 | 21450001 | 21550000 | 98   | 123  | 21500000 | -0.40018 | 9.99E-09    |
| chr16 | 21550001 | 21650000 | 968  | 840  | 21600000 | 0.132246 | 0.030579221 |
| chr16 | 21700001 | 21800000 | 367  | 386  | 21750000 | -0.14519 | 0.019706105 |
| chr16 | 21750001 | 21850000 | 44   | 33   | 21800000 | 0.342666 | 8.12E-07    |
| chr16 | 21800001 | 21900000 | 22   | 15   | 21850000 | 0.480169 | 1.58E-11    |
| chr16 | 21850001 | 21950000 | 26   | 31   | 21900000 | -0.32613 | 2.16E-06    |
| chr16 | 22250001 | 22350000 | 926  | 957  | 22300000 | -0.11988 | 0.044425366 |
| chr16 | 22500001 | 22600000 | 38   | 20   | 22550000 | 0.853628 | 1.21E-29    |
| chr16 | 23100001 | 23200000 | 916  | 954  | 23150000 | -0.13101 | 0.03149972  |
| chr16 | 23450001 | 23550000 | 869  | 934  | 23500000 | -0.17644 | 0.006186761 |

|       |          |          |      |      |          |          |             |
|-------|----------|----------|------|------|----------|----------|-------------|
| chr16 | 24600001 | 24700000 | 924  | 797  | 24650000 | 0.140941 | 0.023030347 |
| chr16 | 24650001 | 24750000 | 883  | 730  | 24700000 | 0.202145 | 0.002161139 |
| chr16 | 24700001 | 24800000 | 981  | 838  | 24750000 | 0.154931 | 0.014201471 |
| chr16 | 25050001 | 25150000 | 923  | 794  | 25100000 | 0.144482 | 0.020209695 |
| chr16 | 25300001 | 25400000 | 874  | 937  | 25350000 | -0.17279 | 0.007146991 |
| chr16 | 25350001 | 25450000 | 879  | 945  | 25400000 | -0.17682 | 0.006092545 |
| chr16 | 25850001 | 25950000 | 1015 | 1063 | 25900000 | -0.13903 | 0.024263761 |
| chr16 | 26750001 | 26850000 | 1006 | 1139 | 26800000 | -0.25151 | 0.000187914 |
| chr16 | 26800001 | 26900000 | 997  | 1046 | 26850000 | -0.14159 | 0.022274894 |
| chr16 | 27000001 | 27100000 | 1011 | 1043 | 27050000 | -0.11733 | 0.047921086 |
| chr16 | 27050001 | 27150000 | 978  | 1031 | 27100000 | -0.14851 | 0.017568599 |
| chr16 | 27100001 | 27200000 | 948  | 1049 | 27150000 | -0.21843 | 0.000992079 |
| chr16 | 27150001 | 27250000 | 955  | 1059 | 27200000 | -0.2215  | 0.000856985 |
| chr16 | 27300001 | 27400000 | 980  | 1013 | 27350000 | -0.12015 | 0.044062686 |
| chr16 | 27350001 | 27450000 | 982  | 1034 | 27400000 | -0.14681 | 0.018635748 |
| chr16 | 27400001 | 27500000 | 1034 | 1082 | 27450000 | -0.13784 | 0.025246001 |
| chr16 | 27450001 | 27550000 | 1073 | 1128 | 27500000 | -0.14449 | 0.020187022 |
| chr16 | 27700001 | 27800000 | 1062 | 1119 | 27750000 | -0.1478  | 0.01800968  |
| chr16 | 27750001 | 27850000 | 1026 | 1066 | 27800000 | -0.12755 | 0.035137642 |
| chr16 | 28000001 | 28100000 | 994  | 1050 | 28050000 | -0.15144 | 0.015846708 |
| chr16 | 28200001 | 28300000 | 845  | 908  | 28250000 | -0.17611 | 0.006267447 |
| chr16 | 28250001 | 28350000 | 820  | 902  | 28300000 | -0.20988 | 0.001477547 |
| chr16 | 28300001 | 28400000 | 378  | 424  | 28350000 | -0.23805 | 0.000378596 |
| chr16 | 28350001 | 28450000 | 6    | 5    | 28400000 | 0.190663 | 0.003540577 |
| chr16 | 28650001 | 28750000 | 8    | 9    | 28700000 | -0.2423  | 0.000304577 |
| chr16 | 28900001 | 29000000 | 890  | 957  | 28950000 | -0.17709 | 0.006029023 |
| chr16 | 29000001 | 29100000 | 392  | 338  | 29050000 | 0.141459 | 0.022635911 |
| chr16 | 29100001 | 29200000 | 202  | 230  | 29150000 | -0.25965 | 0.000121103 |
| chr16 | 29150001 | 29250000 | 189  | 271  | 29200000 | -0.59228 | 1.56E-16    |
| chr16 | 29200001 | 29300000 | 189  | 214  | 29250000 | -0.2516  | 0.000187045 |
| chr16 | 29300001 | 29400000 | 150  | 180  | 29350000 | -0.33541 | 1.16E-06    |
| chr16 | 29350001 | 29450000 | 34   | 49   | 29400000 | -0.59962 | 7.07E-17    |
| chr16 | 29400001 | 29500000 | 22   | 30   | 29450000 | -0.51983 | 2.59E-13    |
| chr16 | 29450001 | 29550000 | 7    | 6    | 29500000 | 0.150021 | 0.016892961 |
| chr16 | 29500001 | 29600000 | 21   | 28   | 29550000 | -0.48741 | 5.63E-12    |
| chr16 | 29550001 | 29650000 | 54   | 64   | 29600000 | -0.31748 | 3.81E-06    |
| chr16 | 29600001 | 29700000 | 419  | 447  | 29650000 | -0.1657  | 0.009395071 |
| chr16 | 29650001 | 29750000 | 736  | 798  | 29700000 | -0.18905 | 0.003689566 |
| chr16 | 29750001 | 29850000 | 890  | 968  | 29800000 | -0.19357 | 0.003044919 |
| chr16 | 29800001 | 29900000 | 908  | 1029 | 29850000 | -0.25285 | 0.000174934 |
| chr16 | 29850001 | 29950000 | 887  | 917  | 29900000 | -0.12036 | 0.043789927 |
| chr16 | 29950001 | 30050000 | 960  | 1031 | 3.00E+07 | -0.17531 | 0.00647054  |
| chr16 | 30000001 | 30100000 | 955  | 1027 | 30050000 | -0.17724 | 0.00599299  |
| chr16 | 30150001 | 30250000 | 353  | 372  | 30200000 | -0.14801 | 0.017879697 |
| chr16 | 30200001 | 30300000 | 5    | 6    | 30250000 | -0.33541 | 1.16E-06    |
| chr16 | 30250001 | 30350000 | 40   | 43   | 30300000 | -0.17671 | 0.006120447 |
| chr16 | 30300001 | 30400000 | 487  | 507  | 30350000 | -0.13044 | 0.032083616 |

|       |          |          |      |      |          |          |             |
|-------|----------|----------|------|------|----------|----------|-------------|
| chr16 | 30400001 | 30500000 | 928  | 779  | 30450000 | 0.18013  | 0.005456873 |
| chr16 | 30500001 | 30600000 | 804  | 874  | 30550000 | -0.19281 | 0.0031462   |
| chr16 | 30650001 | 30750000 | 921  | 952  | 30700000 | -0.12013 | 0.044089234 |
| chr16 | 30850001 | 30950000 | 845  | 906  | 30900000 | -0.17293 | 0.007106767 |
| chr16 | 30900001 | 31000000 | 938  | 1028 | 30950000 | -0.20455 | 0.001880837 |
| chr16 | 30950001 | 31050000 | 946  | 1053 | 3.10E+07 | -0.22697 | 0.000657937 |
| chr16 | 31000001 | 31100000 | 918  | 1064 | 31050000 | -0.2853  | 2.81E-05    |
| chr16 | 31050001 | 31150000 | 901  | 991  | 31100000 | -0.20973 | 0.001487431 |
| chr16 | 31300001 | 31400000 | 799  | 844  | 31350000 | -0.15142 | 0.015860226 |
| chr16 | 31350001 | 31450000 | 886  | 971  | 31400000 | -0.20454 | 0.001882174 |
| chr16 | 31400001 | 31500000 | 947  | 1044 | 31450000 | -0.21306 | 0.001275972 |
| chr16 | 31650001 | 31750000 | 832  | 884  | 31700000 | -0.15983 | 0.011699331 |
| chr16 | 31700001 | 31800000 | 749  | 791  | 31750000 | -0.15108 | 0.016049654 |
| chr16 | 31750001 | 31850000 | 667  | 574  | 31800000 | 0.144264 | 0.020594785 |
| chr16 | 32000001 | 32100000 | 38   | 49   | 32050000 | -0.43915 | 4.09E-10    |
| chr16 | 32050001 | 32150000 | 42   | 61   | 32100000 | -0.61079 | 2.09E-17    |
| chr16 | 32100001 | 32200000 | 53   | 73   | 32150000 | -0.53428 | 6.26E-14    |
| chr16 | 32150001 | 32250000 | 36   | 43   | 32200000 | -0.32871 | 1.82E-06    |
| chr16 | 32200001 | 32300000 | 56   | 68   | 32250000 | -0.35248 | 3.55E-07    |
| chr16 | 32250001 | 32350000 | 80   | 111  | 32300000 | -0.54486 | 2.17E-14    |
| chr16 | 32300001 | 32400000 | 94   | 107  | 32350000 | -0.25925 | 0.000123783 |
| chr16 | 32400001 | 32500000 | 154  | 173  | 32450000 | -0.24021 | 0.000339014 |
| chr16 | 32650001 | 32750000 | 77   | 63   | 32700000 | 0.217135 | 0.001095891 |
| chr16 | 32700001 | 32800000 | 1    | 5    | 32750000 | -2.3943  | 1.39E-120   |
| chr16 | 32750001 | 32850000 | 97   | 107  | 32800000 | -0.21393 | 0.001225497 |
| chr16 | 32900001 | 33000000 | 17   | 24   | 32950000 | -0.56987 | 1.67E-15    |
| chr16 | 32950001 | 33050000 | 22   | 24   | 3.30E+07 | -0.1979  | 0.002524585 |
| chr16 | 33000001 | 33100000 | 31   | 44   | 33050000 | -0.57761 | 7.42E-16    |
| chr16 | 33050001 | 33150000 | 16   | 30   | 33100000 | -0.97926 | 5.82E-38    |
| chr16 | 33150001 | 33250000 | 61   | 97   | 33200000 | -0.74155 | 4.50E-24    |
| chr16 | 33200001 | 33300000 | 144  | 192  | 33250000 | -0.48741 | 5.63E-12    |
| chr16 | 33250001 | 33350000 | 118  | 125  | 33300000 | -0.15551 | 0.013699426 |
| chr16 | 33400001 | 33500000 | 302  | 259  | 33450000 | 0.149225 | 0.017368116 |
| chr16 | 33650001 | 33750000 | 32   | 23   | 33700000 | 0.404066 | 9.19E-09    |
| chr16 | 33700001 | 33800000 | 49   | 38   | 33750000 | 0.294411 | 1.78E-05    |
| chr16 | 33750001 | 33850000 | 95   | 105  | 33800000 | -0.21676 | 0.001073217 |
| chr16 | 33800001 | 33900000 | 684  | 823  | 33850000 | -0.33927 | 8.92E-07    |
| chr16 | 33850001 | 33950000 | 1667 | 1781 | 33900000 | -0.16781 | 0.008669265 |
| chr16 | 33900001 | 34000000 | 2926 | 3122 | 33950000 | -0.16591 | 0.009318292 |
| chr16 | 33950001 | 34050000 | 2161 | 2350 | 3.40E+07 | -0.19333 | 0.003076419 |
| chr16 | 34150001 | 34250000 | 835  | 732  | 34200000 | 0.117561 | 0.047931006 |
| chr16 | 34550001 | 34650000 | 899  | 942  | 34600000 | -0.13978 | 0.023669823 |
| chr16 | 46350001 | 46450000 | 1872 | 2031 | 46400000 | -0.18998 | 0.003548121 |
| chr16 | 46400001 | 46500000 | 1617 | 1812 | 46450000 | -0.23664 | 0.000406761 |
| chr16 | 46800001 | 46900000 | 942  | 826  | 46850000 | 0.117214 | 0.048421652 |
| chr16 | 47000001 | 47100000 | 871  | 907  | 47050000 | -0.1308  | 0.0317128   |
| chr16 | 47050001 | 47150000 | 862  | 960  | 47100000 | -0.22772 | 0.000634129 |



|       |          |          |      |      |          |          |             |
|-------|----------|----------|------|------|----------|----------|-------------|
| chr16 | 47100001 | 47200000 | 878  | 938  | 47150000 | -0.16774 | 0.008691354 |
| chr16 | 47150001 | 47250000 | 833  | 886  | 47200000 | -0.16136 | 0.011055895 |
| chr16 | 48100001 | 48200000 | 1028 | 1100 | 48150000 | -0.17004 | 0.007955874 |
| chr16 | 48300001 | 48400000 | 987  | 853  | 48350000 | 0.138133 | 0.025274891 |
| chr16 | 48350001 | 48450000 | 971  | 829  | 48400000 | 0.155727 | 0.013801928 |
| chr16 | 48400001 | 48500000 | 905  | 779  | 48450000 | 0.143923 | 0.020834598 |
| chr16 | 48550001 | 48650000 | 962  | 1028 | 48600000 | -0.1681  | 0.008570763 |
| chr16 | 48600001 | 48700000 | 871  | 948  | 48650000 | -0.19459 | 0.002915205 |
| chr16 | 48900001 | 49000000 | 1066 | 1139 | 48950000 | -0.16793 | 0.008627206 |
| chr16 | 48950001 | 49050000 | 1056 | 1133 | 4.90E+07 | -0.17391 | 0.006838645 |
| chr16 | 49100001 | 49200000 | 1004 | 1045 | 49150000 | -0.13012 | 0.032411199 |
| chr16 | 49250001 | 49350000 | 994  | 1026 | 49300000 | -0.11808 | 0.046861528 |
| chr16 | 49450001 | 49550000 | 1076 | 1194 | 49500000 | -0.2225  | 0.000817041 |
| chr16 | 49500001 | 49600000 | 1123 | 1196 | 49550000 | -0.16323 | 0.010310589 |
| chr16 | 49600001 | 49700000 | 1077 | 1182 | 49650000 | -0.20658 | 0.001716382 |
| chr16 | 49750001 | 49850000 | 1041 | 1108 | 49800000 | -0.16236 | 0.010652484 |
| chr16 | 49800001 | 49900000 | 1028 | 1115 | 49850000 | -0.18958 | 0.003609525 |
| chr16 | 50100001 | 50200000 | 863  | 891  | 50150000 | -0.11844 | 0.046375318 |
| chr16 | 50150001 | 50250000 | 877  | 924  | 50200000 | -0.14769 | 0.018078856 |
| chr16 | 50250001 | 50350000 | 1046 | 1089 | 50300000 | -0.13049 | 0.032025479 |
| chr16 | 50300001 | 50400000 | 968  | 1047 | 50350000 | -0.18555 | 0.004270655 |
| chr16 | 50600001 | 50700000 | 1139 | 1176 | 50650000 | -0.11849 | 0.046299088 |
| chr16 | 50650001 | 50750000 | 1113 | 1215 | 50700000 | -0.19887 | 0.00241947  |
| chr16 | 50700001 | 50800000 | 1032 | 1190 | 50750000 | -0.27789 | 4.34E-05    |
| chr16 | 50750001 | 50850000 | 1022 | 1100 | 50800000 | -0.17848 | 0.005701194 |
| chr16 | 50800001 | 50900000 | 1048 | 1088 | 50850000 | -0.12641 | 0.036404016 |
| chr16 | 50950001 | 51050000 | 1076 | 1131 | 5.10E+07 | -0.14429 | 0.020322813 |
| chr16 | 51500001 | 51600000 | 1002 | 870  | 51550000 | 0.131423 | 0.031389294 |
| chr16 | 51700001 | 51800000 | 1148 | 984  | 51750000 | 0.150021 | 0.016892961 |
| chr16 | 52250001 | 52350000 | 990  | 1031 | 52300000 | -0.13092 | 0.031597912 |
| chr16 | 52300001 | 52400000 | 907  | 935  | 52350000 | -0.11624 | 0.049484196 |
| chr16 | 52650001 | 52750000 | 985  | 1024 | 52700000 | -0.12839 | 0.034221784 |
| chr16 | 52700001 | 52800000 | 1004 | 1047 | 52750000 | -0.13287 | 0.029678782 |
| chr16 | 53100001 | 53200000 | 959  | 799  | 53150000 | 0.190964 | 0.003496096 |
| chr16 | 53250001 | 53350000 | 961  | 831  | 53300000 | 0.137316 | 0.025960797 |
| chr16 | 53300001 | 53400000 | 812  | 712  | 53350000 | 0.117231 | 0.048397245 |
| chr16 | 53350001 | 53450000 | 775  | 656  | 53400000 | 0.168129 | 0.008724862 |
| chr16 | 54000001 | 54100000 | 1034 | 885  | 54050000 | 0.152115 | 0.015695667 |
| chr16 | 54150001 | 54250000 | 1086 | 1126 | 54200000 | -0.12455 | 0.038553038 |
| chr16 | 54900001 | 55000000 | 965  | 1029 | 54950000 | -0.16501 | 0.009641103 |
| chr16 | 54950001 | 55050000 | 1028 | 1083 | 5.50E+07 | -0.14756 | 0.018156311 |
| chr16 | 55150001 | 55250000 | 1084 | 1141 | 55200000 | -0.14631 | 0.018965315 |
| chr16 | 55200001 | 55300000 | 1057 | 1100 | 55250000 | -0.1299  | 0.032633177 |
| chr16 | 55400001 | 55500000 | 1059 | 1129 | 55450000 | -0.16471 | 0.009750751 |
| chr16 | 55450001 | 55550000 | 1012 | 1148 | 55500000 | -0.25429 | 0.000161985 |
| chr16 | 55650001 | 55750000 | 1026 | 1109 | 55700000 | -0.1846  | 0.004442613 |
| chr16 | 56250001 | 56350000 | 1082 | 1131 | 56300000 | -0.13627 | 0.026580532 |

|       |          |          |      |      |          |          |             |
|-------|----------|----------|------|------|----------|----------|-------------|
| chr16 | 56300001 | 56400000 | 1121 | 1209 | 56350000 | -0.1814  | 0.00506583  |
| chr16 | 56350001 | 56450000 | 991  | 1049 | 56400000 | -0.15443 | 0.014245005 |
| chr16 | 56650001 | 56750000 | 951  | 985  | 56700000 | -0.12305 | 0.04036884  |
| chr16 | 57050001 | 57150000 | 1086 | 1134 | 57100000 | -0.13477 | 0.027915533 |
| chr16 | 57100001 | 57200000 | 1067 | 1135 | 57150000 | -0.1615  | 0.010997705 |
| chr16 | 57400001 | 57500000 | 937  | 968  | 57450000 | -0.11933 | 0.045159512 |
| chr16 | 57450001 | 57550000 | 986  | 1030 | 57500000 | -0.13536 | 0.027386127 |
| chr16 | 57500001 | 57600000 | 986  | 1144 | 57550000 | -0.2868  | 2.57E-05    |
| chr16 | 57550001 | 57650000 | 959  | 1129 | 57600000 | -0.30781 | 7.08E-06    |
| chr16 | 57600001 | 57700000 | 1056 | 1186 | 57650000 | -0.23987 | 0.0003451   |
| chr16 | 57650001 | 57750000 | 1106 | 1203 | 57700000 | -0.19366 | 0.003034023 |
| chr16 | 57700001 | 57800000 | 1071 | 1193 | 57750000 | -0.22801 | 0.000625207 |
| chr16 | 57750001 | 57850000 | 1060 | 1173 | 57800000 | -0.21851 | 0.000988186 |
| chr16 | 57950001 | 58050000 | 1014 | 1089 | 5.80E+07 | -0.17532 | 0.006468416 |
| chr16 | 58000001 | 58100000 | 1007 | 1072 | 58050000 | -0.16261 | 0.010552081 |
| chr16 | 58450001 | 58550000 | 1021 | 1069 | 58500000 | -0.13865 | 0.024574244 |
| chr16 | 59250001 | 59350000 | 1009 | 807  | 59300000 | 0.249914 | 0.000216585 |
| chr16 | 59300001 | 59400000 | 1000 | 869  | 59350000 | 0.1302   | 0.032626942 |
| chr16 | 59450001 | 59550000 | 1012 | 848  | 59500000 | 0.182701 | 0.004918704 |
| chr16 | 59500001 | 59600000 | 918  | 739  | 59550000 | 0.240548 | 0.000350827 |
| chr16 | 59550001 | 59650000 | 920  | 775  | 59600000 | 0.175066 | 0.006672283 |
| chr16 | 59600001 | 59700000 | 1010 | 847  | 59650000 | 0.18155  | 0.005153562 |
| chr16 | 59650001 | 59750000 | 978  | 840  | 59700000 | 0.147073 | 0.018710041 |
| chr16 | 59700001 | 59800000 | 975  | 820  | 59750000 | 0.177407 | 0.006083422 |
| chr16 | 59750001 | 59850000 | 927  | 758  | 59800000 | 0.218    | 0.001052524 |
| chr16 | 59800001 | 59900000 | 914  | 774  | 59850000 | 0.167489 | 0.008939642 |
| chr16 | 59850001 | 59950000 | 959  | 802  | 59900000 | 0.185557 | 0.004377174 |
| chr16 | 59900001 | 60000000 | 1015 | 878  | 59950000 | 0.136815 | 0.026389472 |
| chr16 | 59950001 | 60050000 | 988  | 847  | 6.00E+07 | 0.149777 | 0.01703703  |
| chr16 | 60100001 | 60200000 | 993  | 830  | 60150000 | 0.186311 | 0.004243439 |
| chr16 | 60150001 | 60250000 | 981  | 858  | 60200000 | 0.120904 | 0.043409489 |
| chr16 | 60950001 | 61050000 | 1024 | 881  | 6.10E+07 | 0.14463  | 0.020340582 |
| chr16 | 61000001 | 61100000 | 1051 | 895  | 61050000 | 0.159431 | 0.012068829 |
| chr16 | 61450001 | 61550000 | 896  | 933  | 61500000 | -0.13075 | 0.031764765 |
| chr16 | 61700001 | 61800000 | 1038 | 876  | 61750000 | 0.172432 | 0.007394862 |
| chr16 | 62800001 | 62900000 | 1056 | 918  | 62850000 | 0.129672 | 0.033173632 |
| chr16 | 62850001 | 62950000 | 1037 | 906  | 62900000 | 0.122461 | 0.041424294 |
| chr16 | 62900001 | 63000000 | 1038 | 908  | 62950000 | 0.12067  | 0.043713328 |
| chr16 | 62950001 | 63050000 | 910  | 797  | 6.30E+07 | 0.118915 | 0.04605565  |
| chr16 | 63000001 | 63100000 | 948  | 801  | 63050000 | 0.170713 | 0.007902947 |
| chr16 | 63050001 | 63150000 | 1082 | 908  | 63100000 | 0.180565 | 0.005362343 |
| chr16 | 63100001 | 63200000 | 919  | 785  | 63150000 | 0.155    | 0.0141663   |
| chr16 | 63900001 | 64000000 | 1029 | 899  | 63950000 | 0.122478 | 0.041403011 |
| chr16 | 63950001 | 64050000 | 1057 | 897  | 6.40E+07 | 0.164424 | 0.010034168 |
| chr16 | 64000001 | 64100000 | 1069 | 926  | 64050000 | 0.134806 | 0.028168397 |
| chr16 | 64150001 | 64250000 | 973  | 852  | 64200000 | 0.119215 | 0.045648932 |
| chr16 | 64600001 | 64700000 | 1054 | 895  | 64650000 | 0.163544 | 0.010369434 |

|       |          |          |      |      |          |          |             |
|-------|----------|----------|------|------|----------|----------|-------------|
| chr16 | 64650001 | 64750000 | 1103 | 943  | 64700000 | 0.153731 | 0.014822331 |
| chr16 | 65000001 | 65100000 | 1152 | 952  | 65050000 | 0.202735 | 0.002105677 |
| chr16 | 65850001 | 65950000 | 1073 | 1126 | 65900000 | -0.14193 | 0.022021496 |
| chr16 | 66150001 | 66250000 | 1100 | 1139 | 66200000 | -0.12264 | 0.040880788 |
| chr16 | 66300001 | 66400000 | 1047 | 1089 | 66350000 | -0.12911 | 0.033452996 |
| chr16 | 66450001 | 66550000 | 982  | 1029 | 66500000 | -0.13982 | 0.023636581 |
| chr16 | 66500001 | 66600000 | 959  | 1021 | 66550000 | -0.16275 | 0.010497389 |
| chr16 | 66550001 | 66650000 | 952  | 1008 | 66600000 | -0.15483 | 0.014039201 |
| chr16 | 66950001 | 67050000 | 928  | 974  | 6.70E+07 | -0.14217 | 0.02184358  |
| chr16 | 67000001 | 67100000 | 851  | 881  | 67050000 | -0.12235 | 0.041231553 |
| chr16 | 67100001 | 67200000 | 921  | 984  | 67150000 | -0.16783 | 0.00866138  |
| chr16 | 67150001 | 67250000 | 924  | 1156 | 67200000 | -0.39555 | 1.44E-08    |
| chr16 | 67200001 | 67300000 | 972  | 1200 | 67250000 | -0.37638 | 6.22E-08    |
| chr16 | 67250001 | 67350000 | 1011 | 1118 | 67300000 | -0.21751 | 0.001036092 |
| chr16 | 67400001 | 67500000 | 1041 | 1202 | 67450000 | -0.27984 | 3.87E-05    |
| chr16 | 67450001 | 67550000 | 961  | 1098 | 67500000 | -0.26464 | 9.20E-05    |
| chr16 | 67550001 | 67650000 | 885  | 929  | 67600000 | -0.14237 | 0.021693316 |
| chr16 | 67600001 | 67700000 | 853  | 889  | 67650000 | -0.13201 | 0.030513702 |
| chr16 | 67850001 | 67950000 | 878  | 966  | 67900000 | -0.21017 | 0.001457452 |
| chr16 | 67900001 | 68000000 | 932  | 1090 | 67950000 | -0.2983  | 1.28E-05    |
| chr16 | 67950001 | 68050000 | 939  | 1022 | 6.80E+07 | -0.19457 | 0.002917241 |
| chr16 | 68000001 | 68100000 | 836  | 864  | 68050000 | -0.1199  | 0.044396614 |
| chr16 | 68100001 | 68200000 | 953  | 820  | 68150000 | 0.144481 | 0.020444149 |
| chr16 | 68150001 | 68250000 | 898  | 783  | 68200000 | 0.125331 | 0.037959513 |
| chr16 | 68450001 | 68550000 | 1013 | 1046 | 68500000 | -0.11862 | 0.046122976 |
| chr16 | 69250001 | 69350000 | 839  | 733  | 69300000 | 0.122486 | 0.041393448 |
| chr16 | 69500001 | 69600000 | 857  | 900  | 69550000 | -0.143   | 0.021236137 |
| chr16 | 69600001 | 69700000 | 873  | 749  | 69650000 | 0.148644 | 0.017721839 |
| chr16 | 70000001 | 70100000 | 115  | 125  | 70050000 | -0.19267 | 0.003165567 |
| chr16 | 70150001 | 70250000 | 360  | 379  | 70200000 | -0.14657 | 0.018791278 |
| chr16 | 70200001 | 70300000 | 228  | 193  | 70250000 | 0.168061 | 0.008747308 |
| chr16 | 70650001 | 70750000 | 931  | 1019 | 70700000 | -0.20267 | 0.002045653 |
| chr16 | 70700001 | 70800000 | 1054 | 1202 | 70750000 | -0.26193 | 0.000106836 |
| chr16 | 70750001 | 70850000 | 1026 | 1070 | 70800000 | -0.13295 | 0.029604496 |
| chr16 | 71400001 | 71500000 | 983  | 1063 | 71450000 | -0.18525 | 0.004324839 |
| chr16 | 71450001 | 71550000 | 946  | 978  | 71500000 | -0.12037 | 0.043781189 |
| chr16 | 71600001 | 71700000 | 930  | 809  | 71650000 | 0.128719 | 0.034179005 |
| chr16 | 71750001 | 71850000 | 909  | 744  | 71800000 | 0.216606 | 0.001123218 |
| chr16 | 71800001 | 71900000 | 885  | 755  | 71850000 | 0.156829 | 0.013265254 |
| chr16 | 72150001 | 72250000 | 1015 | 1060 | 72200000 | -0.13496 | 0.027745417 |
| chr16 | 72200001 | 72300000 | 1065 | 1119 | 72250000 | -0.14373 | 0.020717785 |
| chr16 | 72300001 | 72400000 | 950  | 829  | 72350000 | 0.124184 | 0.039315413 |
| chr16 | 72500001 | 72600000 | 897  | 756  | 72550000 | 0.17435  | 0.006862183 |
| chr16 | 72700001 | 72800000 | 985  | 840  | 72750000 | 0.157363 | 0.013011876 |
| chr16 | 72750001 | 72850000 | 1039 | 906  | 72800000 | 0.125241 | 0.038064947 |
| chr16 | 73350001 | 73450000 | 1034 | 1105 | 73400000 | -0.16818 | 0.008544913 |
| chr16 | 73700001 | 73800000 | 1011 | 880  | 73750000 | 0.127836 | 0.035133569 |

|       |          |          |      |      |          |          |             |
|-------|----------|----------|------|------|----------|----------|-------------|
| chr16 | 74700001 | 74800000 | 915  | 961  | 74750000 | -0.14314 | 0.021139112 |
| chr16 | 75200001 | 75300000 | 950  | 1004 | 75250000 | -0.15213 | 0.015464407 |
| chr16 | 75250001 | 75350000 | 949  | 1012 | 75300000 | -0.1651  | 0.009609369 |
| chr16 | 75400001 | 75500000 | 860  | 752  | 75450000 | 0.121232 | 0.042984463 |
| chr16 | 75500001 | 75600000 | 781  | 812  | 75550000 | -0.12853 | 0.034074784 |
| chr16 | 75550001 | 75650000 | 858  | 912  | 75600000 | -0.16043 | 0.011445603 |
| chr16 | 75600001 | 75700000 | 921  | 973  | 75650000 | -0.15161 | 0.015753166 |
| chr16 | 75800001 | 75900000 | 930  | 795  | 75850000 | 0.153904 | 0.014731522 |
| chr16 | 76300001 | 76400000 | 1044 | 916  | 76350000 | 0.11633  | 0.049687482 |
| chr16 | 76350001 | 76450000 | 1043 | 887  | 76400000 | 0.161361 | 0.011243175 |
| chr16 | 76400001 | 76500000 | 1034 | 895  | 76450000 | 0.135905 | 0.027183429 |
| chr16 | 76650001 | 76750000 | 1091 | 937  | 76700000 | 0.147158 | 0.01865538  |
| chr16 | 76700001 | 76800000 | 1036 | 909  | 76750000 | 0.1163   | 0.049731533 |
| chr16 | 76900001 | 77000000 | 1026 | 900  | 76950000 | 0.116662 | 0.049209057 |
| chr16 | 77050001 | 77150000 | 1008 | 869  | 77100000 | 0.141696 | 0.022457    |
| chr16 | 77200001 | 77300000 | 934  | 1003 | 77250000 | -0.1752  | 0.006499037 |
| chr16 | 77500001 | 77600000 | 1013 | 871  | 77550000 | 0.145518 | 0.019734681 |
| chr16 | 77600001 | 77700000 | 982  | 1024 | 77650000 | -0.13279 | 0.029756566 |
| chr16 | 78200001 | 78300000 | 929  | 993  | 78250000 | -0.16849 | 0.008445421 |
| chr16 | 79050001 | 79150000 | 979  | 1017 | 79100000 | -0.12731 | 0.035399483 |
| chr16 | 79300001 | 79400000 | 1080 | 1119 | 79350000 | -0.12355 | 0.039757335 |
| chr16 | 79350001 | 79450000 | 992  | 1070 | 79400000 | -0.18157 | 0.005030697 |
| chr16 | 79600001 | 79700000 | 1012 | 1058 | 79650000 | -0.1365  | 0.026379237 |
| chr16 | 79950001 | 80050000 | 1041 | 1095 | 8.00E+07 | -0.14533 | 0.0196116   |
| chr16 | 80650001 | 80750000 | 987  | 1050 | 80700000 | -0.16164 | 0.010942513 |
| chr16 | 80700001 | 80800000 | 990  | 1027 | 80750000 | -0.12531 | 0.037669475 |
| chr16 | 80900001 | 81000000 | 938  | 984  | 80950000 | -0.14144 | 0.022385475 |
| chr16 | 81000001 | 81100000 | 886  | 936  | 81050000 | -0.15157 | 0.015773739 |
| chr16 | 81050001 | 81150000 | 830  | 856  | 81100000 | -0.11687 | 0.048569721 |
| chr16 | 81400001 | 81500000 | 954  | 999  | 81450000 | -0.13887 | 0.024398335 |
| chr16 | 81450001 | 81550000 | 1004 | 1063 | 81500000 | -0.15475 | 0.014079619 |
| chr16 | 82300001 | 82400000 | 939  | 1007 | 82350000 | -0.17324 | 0.00702167  |
| chr16 | 83050001 | 83150000 | 1128 | 975  | 83100000 | 0.137921 | 0.025451024 |
| chr16 | 83100001 | 83200000 | 1111 | 949  | 83150000 | 0.155007 | 0.014162946 |
| chr16 | 83400001 | 83500000 | 978  | 1088 | 83450000 | -0.22614 | 0.000684833 |
| chr16 | 83450001 | 83550000 | 990  | 1065 | 83500000 | -0.17772 | 0.005876707 |
| chr16 | 83800001 | 83900000 | 954  | 988  | 83850000 | -0.12289 | 0.040561808 |
| chr16 | 83900001 | 84000000 | 1026 | 1082 | 83950000 | -0.14904 | 0.017245068 |
| chr16 | 83950001 | 84050000 | 1006 | 1203 | 8.40E+07 | -0.33038 | 1.63E-06    |
| chr16 | 84000001 | 84100000 | 997  | 1113 | 84050000 | -0.23116 | 0.000535152 |
| chr16 | 84050001 | 84150000 | 980  | 1061 | 84100000 | -0.18694 | 0.004030996 |
| chr16 | 84150001 | 84250000 | 926  | 974  | 84200000 | -0.14528 | 0.019646128 |
| chr16 | 84200001 | 84300000 | 949  | 1037 | 84250000 | -0.20031 | 0.00227169  |
| chr16 | 84250001 | 84350000 | 1004 | 1068 | 84300000 | -0.16152 | 0.010989422 |
| chr16 | 84300001 | 84400000 | 987  | 1058 | 84350000 | -0.17259 | 0.007202687 |
| chr16 | 84350001 | 84450000 | 964  | 994  | 84400000 | -0.11658 | 0.048980571 |
| chr16 | 84550001 | 84650000 | 980  | 1031 | 84600000 | -0.14556 | 0.019457281 |

|       |          |          |      |      |          |          |             |
|-------|----------|----------|------|------|----------|----------|-------------|
| chr16 | 84750001 | 84850000 | 912  | 972  | 84800000 | -0.16429 | 0.009906641 |
| chr16 | 84800001 | 84900000 | 943  | 982  | 84850000 | -0.13084 | 0.031677087 |
| chr16 | 84900001 | 85000000 | 1030 | 1095 | 84950000 | -0.16066 | 0.011348396 |
| chr16 | 84950001 | 85050000 | 991  | 1090 | 8.50E+07 | -0.20974 | 0.001486531 |
| chr16 | 85000001 | 85100000 | 914  | 953  | 85050000 | -0.13265 | 0.029889551 |
| chr16 | 85100001 | 85200000 | 1041 | 1138 | 85150000 | -0.2009  | 0.002212823 |
| chr16 | 85150001 | 85250000 | 1064 | 1265 | 85200000 | -0.32201 | 2.84E-06    |
| chr16 | 85200001 | 85300000 | 1050 | 1277 | 85250000 | -0.35474 | 3.02E-07    |
| chr16 | 85250001 | 85350000 | 979  | 1212 | 85300000 | -0.38038 | 4.60E-08    |
| chr16 | 85300001 | 85400000 | 1043 | 1194 | 85350000 | -0.26744 | 7.87E-05    |
| chr16 | 85350001 | 85450000 | 999  | 1165 | 85400000 | -0.29415 | 1.65E-05    |
| chr16 | 85400001 | 85500000 | 999  | 1163 | 85450000 | -0.29167 | 1.92E-05    |
| chr16 | 85450001 | 85550000 | 1110 | 1238 | 85500000 | -0.22982 | 0.000571751 |
| chr16 | 85500001 | 85600000 | 1108 | 1217 | 85550000 | -0.20774 | 0.001628502 |
| chr16 | 85550001 | 85650000 | 1143 | 1180 | 85600000 | -0.11833 | 0.046517783 |
| chr16 | 85600001 | 85700000 | 1158 | 1251 | 85650000 | -0.18382 | 0.004588205 |
| chr16 | 85650001 | 85750000 | 1069 | 1158 | 85700000 | -0.18775 | 0.003898071 |
| chr16 | 85700001 | 85800000 | 950  | 1003 | 85750000 | -0.15069 | 0.016272159 |
| chr16 | 85750001 | 85850000 | 919  | 1033 | 85800000 | -0.24108 | 0.000324351 |
| chr16 | 85800001 | 85900000 | 968  | 1001 | 85850000 | -0.12073 | 0.043299023 |
| chr16 | 85900001 | 86000000 | 1008 | 1045 | 85950000 | -0.12438 | 0.03876128  |
| chr16 | 85950001 | 86050000 | 1064 | 1105 | 8.60E+07 | -0.12692 | 0.035833171 |
| chr16 | 86250001 | 86350000 | 953  | 1047 | 86300000 | -0.20809 | 0.001603375 |
| chr16 | 86300001 | 86400000 | 989  | 1129 | 86350000 | -0.26337 | 9.87E-05    |
| chr16 | 86350001 | 86450000 | 1032 | 1172 | 86400000 | -0.2559  | 0.000148476 |
| chr16 | 86400001 | 86500000 | 1082 | 1237 | 86450000 | -0.26552 | 8.76E-05    |
| chr16 | 86450001 | 86550000 | 1138 | 1243 | 86500000 | -0.1997  | 0.002333574 |
| chr16 | 86500001 | 86600000 | 1082 | 1179 | 86550000 | -0.19623 | 0.002714645 |
| chr16 | 86550001 | 86650000 | 1020 | 1058 | 86600000 | -0.12514 | 0.037861969 |
| chr16 | 86650001 | 86750000 | 1082 | 1141 | 86700000 | -0.14897 | 0.017288252 |
| chr16 | 86800001 | 86900000 | 1036 | 1075 | 86850000 | -0.12568 | 0.037233496 |
| chr16 | 86950001 | 87050000 | 1094 | 1204 | 8.70E+07 | -0.21059 | 0.001429596 |
| chr16 | 87000001 | 87100000 | 1060 | 1160 | 87050000 | -0.20243 | 0.00206766  |
| chr16 | 87050001 | 87150000 | 1036 | 1105 | 87100000 | -0.16539 | 0.009503338 |
| chr16 | 87150001 | 87250000 | 1025 | 1085 | 87200000 | -0.15444 | 0.014238136 |
| chr16 | 87200001 | 87300000 | 1020 | 1098 | 87250000 | -0.17868 | 0.005655377 |
| chr16 | 87300001 | 87400000 | 1044 | 1104 | 87350000 | -0.15299 | 0.014998645 |
| chr16 | 87350001 | 87450000 | 947  | 1055 | 87400000 | -0.22818 | 0.000619979 |
| chr16 | 87450001 | 87550000 | 788  | 842  | 87500000 | -0.168   | 0.008605965 |
| chr16 | 87500001 | 87600000 | 787  | 884  | 87550000 | -0.24005 | 0.000341785 |
| chr16 | 87550001 | 87650000 | 951  | 1057 | 87600000 | -0.22483 | 0.000729998 |
| chr16 | 87600001 | 87700000 | 1004 | 1105 | 87650000 | -0.21066 | 0.001425369 |
| chr16 | 87650001 | 87750000 | 1069 | 1177 | 87700000 | -0.21122 | 0.001388774 |
| chr16 | 87800001 | 87900000 | 885  | 983  | 87850000 | -0.22389 | 0.000764132 |
| chr16 | 87850001 | 87950000 | 654  | 738  | 87900000 | -0.2467  | 0.000242228 |
| chr16 | 87900001 | 88000000 | 557  | 609  | 87950000 | -0.20114 | 0.002189999 |
| chr16 | 87950001 | 88050000 | 674  | 698  | 8.80E+07 | -0.12285 | 0.040615331 |

|       |          |          |      |      |          |          |             |
|-------|----------|----------|------|------|----------|----------|-------------|
| chr16 | 88000001 | 88100000 | 594  | 630  | 88050000 | -0.15726 | 0.012857506 |
| chr16 | 88050001 | 88150000 | 551  | 639  | 88100000 | -0.28614 | 2.67E-05    |
| chr16 | 88100001 | 88200000 | 399  | 480  | 88150000 | -0.33902 | 9.07E-07    |
| chr16 | 88150001 | 88250000 | 265  | 315  | 88200000 | -0.32173 | 2.89E-06    |
| chr16 | 88200001 | 88300000 | 186  | 266  | 88250000 | -0.5885  | 2.34E-16    |
| chr16 | 88250001 | 88350000 | 447  | 567  | 88300000 | -0.41545 | 2.94E-09    |
| chr16 | 88300001 | 88400000 | 821  | 1012 | 88350000 | -0.37413 | 7.36E-08    |
| chr16 | 88350001 | 88450000 | 579  | 717  | 88400000 | -0.38078 | 4.47E-08    |
| chr16 | 88400001 | 88500000 | 739  | 888  | 88450000 | -0.33736 | 1.02E-06    |
| chr16 | 88450001 | 88550000 | 1200 | 1457 | 88500000 | -0.35234 | 3.58E-07    |
| chr16 | 88500001 | 88600000 | 1152 | 1411 | 88550000 | -0.36495 | 1.45E-07    |
| chr16 | 88550001 | 88650000 | 1054 | 1278 | 88600000 | -0.35038 | 4.12E-07    |
| chr16 | 88600001 | 88700000 | 1048 | 1140 | 88650000 | -0.19377 | 0.00301975  |
| chr16 | 88650001 | 88750000 | 1035 | 1164 | 88700000 | -0.24183 | 0.000311964 |
| chr16 | 88700001 | 88800000 | 1028 | 1234 | 88750000 | -0.33587 | 1.12E-06    |
| chr16 | 88750001 | 88850000 | 1024 | 1289 | 88800000 | -0.40441 | 7.15E-09    |
| chr16 | 88800001 | 88900000 | 950  | 1224 | 88850000 | -0.43798 | 4.52E-10    |
| chr16 | 88850001 | 88950000 | 992  | 1217 | 88900000 | -0.36729 | 1.22E-07    |
| chr16 | 88900001 | 89000000 | 1049 | 1339 | 88950000 | -0.42451 | 1.40E-09    |
| chr16 | 88950001 | 89050000 | 1048 | 1287 | 8.90E+07 | -0.36875 | 1.10E-07    |
| chr16 | 89000001 | 89100000 | 1017 | 1164 | 89050000 | -0.26714 | 8.00E-05    |
| chr16 | 89050001 | 89150000 | 1023 | 1164 | 89100000 | -0.25866 | 0.000127855 |
| chr16 | 89100001 | 89200000 | 1050 | 1207 | 89150000 | -0.27341 | 5.61E-05    |
| chr16 | 89150001 | 89250000 | 1062 | 1258 | 89200000 | -0.31672 | 4.01E-06    |
| chr16 | 89200001 | 89300000 | 954  | 1184 | 89250000 | -0.38398 | 3.50E-08    |
| chr16 | 89250001 | 89350000 | 818  | 1007 | 89300000 | -0.37226 | 8.45E-08    |
| chr16 | 89300001 | 89400000 | 874  | 1096 | 89350000 | -0.39891 | 1.10E-08    |
| chr16 | 89350001 | 89450000 | 961  | 1132 | 89400000 | -0.30864 | 6.72E-06    |
| chr16 | 89500001 | 89600000 | 812  | 866  | 89550000 | -0.16526 | 0.009552077 |
| chr16 | 89550001 | 89650000 | 903  | 1018 | 89600000 | -0.24531 | 0.000260487 |
| chr16 | 89600001 | 89700000 | 981  | 1131 | 89650000 | -0.27765 | 4.40E-05    |
| chr16 | 89650001 | 89750000 | 898  | 983  | 89700000 | -0.20285 | 0.00202977  |
| chr16 | 89700001 | 89800000 | 876  | 966  | 89750000 | -0.21346 | 0.001252096 |
| chr16 | 89750001 | 89850000 | 851  | 991  | 89800000 | -0.2921  | 1.87E-05    |
| chr16 | 89800001 | 89900000 | 776  | 873  | 89850000 | -0.2423  | 0.000304577 |
| chr16 | 89850001 | 89950000 | 796  | 823  | 89900000 | -0.1205  | 0.043611076 |
| chr16 | 89950001 | 90050000 | 872  | 947  | 9.00E+07 | -0.19141 | 0.003339943 |
| chr16 | 90000001 | 90100000 | 878  | 979  | 90050000 | -0.22946 | 0.000582106 |
| chr16 | 90050001 | 90150000 | 894  | 944  | 90100000 | -0.15088 | 0.016163463 |
| chr16 | 90150001 | 90250000 | 35   | 43   | 90200000 | -0.36935 | 1.05E-07    |
| chr16 | 90200001 | 90300000 | 7    | 13   | 90250000 | -0.96546 | 4.15E-37    |
| chr16 | 90250001 | 90350000 | 6    | 5    | 90300000 | 0.190663 | 0.003540577 |
| chr18 | 1        | 100000   | 147  | 178  | 50000    | -0.34843 | 4.72E-07    |
| chr18 | 350001   | 450000   | 1068 | 921  | 4.00E+05 | 0.141267 | 0.022781507 |
| chr18 | 700001   | 800000   | 866  | 748  | 750000   | 0.138957 | 0.024597774 |
| chr18 | 1350001  | 1450000  | 1047 | 894  | 1400000  | 0.155543 | 0.013893618 |
| chr18 | 1400001  | 1500000  | 1062 | 870  | 1450000  | 0.215325 | 0.001192026 |

|       |          |          |      |      |          |          |             |
|-------|----------|----------|------|------|----------|----------|-------------|
| chr18 | 1800001  | 1900000  | 986  | 846  | 1850000  | 0.148558 | 0.017774733 |
| chr18 | 2450001  | 2550000  | 989  | 858  | 2500000  | 0.132621 | 0.030215556 |
| chr18 | 2850001  | 2950000  | 900  | 946  | 2900000  | -0.14429 | 0.020326749 |
| chr18 | 3550001  | 3650000  | 865  | 739  | 3600000  | 0.154754 | 0.01429169  |
| chr18 | 3600001  | 3700000  | 884  | 740  | 3650000  | 0.184149 | 0.004637034 |
| chr18 | 5150001  | 5250000  | 987  | 1041 | 5200000  | -0.14922 | 0.017137739 |
| chr18 | 5200001  | 5300000  | 946  | 982  | 5250000  | -0.12625 | 0.036581806 |
| chr18 | 7650001  | 7750000  | 977  | 857  | 7700000  | 0.116692 | 0.049166628 |
| chr18 | 7700001  | 7800000  | 1009 | 877  | 7750000  | 0.129906 | 0.032930849 |
| chr18 | 8650001  | 8750000  | 903  | 974  | 8700000  | -0.18157 | 0.005031309 |
| chr18 | 8950001  | 9050000  | 996  | 864  | 9.00E+06 | 0.132743 | 0.030098497 |
| chr18 | 10200001 | 10300000 | 985  | 1078 | 10250000 | -0.20253 | 0.002058388 |
| chr18 | 11100001 | 11200000 | 1032 | 905  | 11150000 | 0.117082 | 0.048609211 |
| chr18 | 11150001 | 11250000 | 1054 | 908  | 11200000 | 0.142739 | 0.0216842   |
| chr18 | 11250001 | 11350000 | 1014 | 873  | 11300000 | 0.143632 | 0.021040332 |
| chr18 | 11550001 | 11650000 | 618  | 638  | 11600000 | -0.11832 | 0.046534158 |
| chr18 | 11700001 | 11800000 | 950  | 1027 | 11750000 | -0.18481 | 0.004404572 |
| chr18 | 12000001 | 12100000 | 882  | 968  | 12050000 | -0.2066  | 0.001715094 |
| chr18 | 12050001 | 12150000 | 686  | 725  | 12100000 | -0.15214 | 0.015457501 |
| chr18 | 12200001 | 12300000 | 693  | 759  | 12250000 | -0.20362 | 0.001961334 |
| chr18 | 12250001 | 12350000 | 923  | 994  | 12300000 | -0.17929 | 0.00551887  |
| chr18 | 12700001 | 12800000 | 808  | 860  | 12750000 | -0.16235 | 0.010655049 |
| chr18 | 13100001 | 13200000 | 967  | 1012 | 13150000 | -0.13799 | 0.025115206 |
| chr18 | 13150001 | 13250000 | 970  | 1024 | 13200000 | -0.15053 | 0.016366059 |
| chr18 | 13500001 | 13600000 | 1013 | 1045 | 13550000 | -0.11724 | 0.048044665 |
| chr18 | 13550001 | 13650000 | 987  | 1062 | 13600000 | -0.17803 | 0.005804385 |
| chr18 | 13600001 | 13700000 | 861  | 921  | 13650000 | -0.16956 | 0.008103453 |
| chr18 | 13800001 | 13900000 | 907  | 956  | 13850000 | -0.14828 | 0.017710058 |
| chr18 | 14050001 | 14150000 | 749  | 653  | 14100000 | 0.125511 | 0.037750856 |
| chr18 | 14150001 | 14250000 | 140  | 121  | 14200000 | 0.138048 | 0.025345224 |
| chr18 | 14350001 | 14450000 | 74   | 63   | 14400000 | 0.159802 | 0.011906422 |
| chr18 | 14400001 | 14500000 | 66   | 70   | 14450000 | -0.15726 | 0.012857506 |
| chr18 | 14450001 | 14550000 | 63   | 74   | 14500000 | -0.30455 | 8.70E-06    |
| chr18 | 14500001 | 14600000 | 109  | 115  | 14550000 | -0.14968 | 0.016864887 |
| chr18 | 14550001 | 14650000 | 122  | 135  | 14600000 | -0.21845 | 0.00099102  |
| chr18 | 14750001 | 14850000 | 285  | 250  | 14800000 | 0.116662 | 0.049209057 |
| chr18 | 14800001 | 14900000 | 99   | 85   | 14850000 | 0.147594 | 0.01837747  |
| chr18 | 14900001 | 15000000 | 618  | 650  | 14950000 | -0.1452  | 0.019697926 |
| chr18 | 14950001 | 15050000 | 251  | 262  | 1.50E+07 | -0.13425 | 0.028387928 |
| chr18 | 15000001 | 15100000 | 102  | 108  | 15050000 | -0.15483 | 0.014039201 |
| chr18 | 15050001 | 15150000 | 75   | 82   | 15100000 | -0.20111 | 0.002193062 |
| chr18 | 15100001 | 15200000 | 110  | 91   | 15150000 | 0.201193 | 0.002253387 |
| chr18 | 15150001 | 15250000 | 131  | 104  | 15200000 | 0.260612 | 0.00012255  |
| chr18 | 15200001 | 15300000 | 80   | 68   | 15250000 | 0.162093 | 0.01094313  |
| chr18 | 15250001 | 15350000 | 67   | 70   | 15300000 | -0.13557 | 0.02720003  |
| chr18 | 15350001 | 15450000 | 162  | 177  | 15400000 | -0.20013 | 0.002289825 |
| chr18 | 15400001 | 15500000 | 86   | 105  | 15450000 | -0.36035 | 2.02E-07    |

|       |          |          |      |      |          |          |             |
|-------|----------|----------|------|------|----------|----------|-------------|
| chr18 | 18700001 | 18800000 | 948  | 815  | 18750000 | 0.145715 | 0.019602031 |
| chr18 | 18750001 | 18850000 | 934  | 785  | 18800000 | 0.178358 | 0.00585756  |
| chr18 | 18800001 | 18900000 | 951  | 789  | 18850000 | 0.197048 | 0.002698248 |
| chr18 | 18850001 | 18950000 | 955  | 798  | 18900000 | 0.18674  | 0.004168872 |
| chr18 | 18900001 | 19000000 | 928  | 810  | 18950000 | 0.123831 | 0.03973972  |
| chr18 | 19150001 | 19250000 | 797  | 693  | 19200000 | 0.129353 | 0.033507914 |
| chr18 | 19200001 | 19300000 | 840  | 737  | 19250000 | 0.116353 | 0.049654903 |
| chr18 | 19350001 | 19450000 | 990  | 857  | 19400000 | 0.135762 | 0.0273102   |
| chr18 | 20200001 | 20300000 | 982  | 856  | 20250000 | 0.12574  | 0.037485577 |
| chr18 | 20500001 | 20600000 | 1012 | 813  | 20550000 | 0.24351  | 0.000301687 |
| chr18 | 20550001 | 20650000 | 972  | 729  | 20600000 | 0.342666 | 8.12E-07    |
| chr18 | 20600001 | 20700000 | 875  | 764  | 20650000 | 0.123339 | 0.040338794 |
| chr18 | 20700001 | 20800000 | 954  | 1039 | 20750000 | -0.19551 | 0.002801692 |
| chr18 | 20750001 | 20850000 | 1008 | 1086 | 20800000 | -0.1799  | 0.005383788 |
| chr18 | 21100001 | 21200000 | 899  | 930  | 21150000 | -0.12128 | 0.04259223  |
| chr18 | 21700001 | 21800000 | 928  | 980  | 21750000 | -0.15103 | 0.016080909 |
| chr18 | 22150001 | 22250000 | 942  | 1024 | 22200000 | -0.19279 | 0.00314903  |
| chr18 | 22650001 | 22750000 | 1132 | 983  | 22700000 | 0.131239 | 0.031573493 |
| chr18 | 22750001 | 22850000 | 1086 | 947  | 22800000 | 0.125216 | 0.038094049 |
| chr18 | 23100001 | 23200000 | 1033 | 905  | 23150000 | 0.118479 | 0.046653206 |
| chr18 | 25950001 | 26050000 | 919  | 959  | 2.60E+07 | -0.13384 | 0.028770463 |
| chr18 | 26000001 | 26100000 | 904  | 937  | 26050000 | -0.1241  | 0.039096802 |
| chr18 | 26100001 | 26200000 | 1056 | 907  | 26150000 | 0.147064 | 0.018716325 |
| chr18 | 26150001 | 26250000 | 1055 | 883  | 26200000 | 0.184386 | 0.004592415 |
| chr18 | 26200001 | 26300000 | 979  | 852  | 26250000 | 0.128084 | 0.034863565 |
| chr18 | 26250001 | 26350000 | 1014 | 884  | 26300000 | 0.125568 | 0.037685231 |
| chr18 | 26300001 | 26400000 | 1090 | 950  | 26350000 | 0.125957 | 0.037236742 |
| chr18 | 26350001 | 26450000 | 1068 | 914  | 26400000 | 0.152274 | 0.015607969 |
| chr18 | 26400001 | 26500000 | 1081 | 810  | 26450000 | 0.344001 | 7.41E-07    |
| chr18 | 26450001 | 26550000 | 1110 | 808  | 26500000 | 0.385761 | 3.72E-08    |
| chr18 | 26500001 | 26600000 | 1040 | 884  | 26550000 | 0.162093 | 0.01094313  |
| chr18 | 26550001 | 26650000 | 1025 | 869  | 26600000 | 0.165824 | 0.009520341 |
| chr18 | 26750001 | 26850000 | 1088 | 904  | 26800000 | 0.194912 | 0.002957314 |
| chr18 | 26800001 | 26900000 | 1050 | 889  | 26850000 | 0.167762 | 0.008847312 |
| chr18 | 26850001 | 26950000 | 1032 | 862  | 26900000 | 0.187311 | 0.00407155  |
| chr18 | 26900001 | 27000000 | 976  | 850  | 26950000 | 0.127047 | 0.036004835 |
| chr18 | 27050001 | 27150000 | 974  | 819  | 27100000 | 0.177687 | 0.006016169 |
| chr18 | 27100001 | 27200000 | 1019 | 817  | 27150000 | 0.246374 | 0.000260355 |
| chr18 | 27150001 | 27250000 | 1031 | 882  | 27200000 | 0.152822 | 0.015308373 |
| chr18 | 27300001 | 27400000 | 1008 | 881  | 27350000 | 0.12191  | 0.042118294 |
| chr18 | 27350001 | 27450000 | 1045 | 902  | 27400000 | 0.139932 | 0.023816874 |
| chr18 | 27400001 | 27500000 | 1095 | 873  | 27450000 | 0.254506 | 0.00017003  |
| chr18 | 27450001 | 27550000 | 1017 | 784  | 27500000 | 0.303022 | 1.06E-05    |
| chr18 | 27500001 | 27600000 | 1022 | 852  | 27550000 | 0.190098 | 0.003625407 |
| chr18 | 27650001 | 27750000 | 1033 | 894  | 27700000 | 0.136122 | 0.026992437 |
| chr18 | 28000001 | 28100000 | 1070 | 864  | 28050000 | 0.236136 | 0.000438007 |
| chr18 | 28050001 | 28150000 | 1077 | 895  | 28100000 | 0.194687 | 0.002985899 |



|       |          |          |      |      |          |          |             |
|-------|----------|----------|------|------|----------|----------|-------------|
| chr18 | 28100001 | 28200000 | 1045 | 891  | 28150000 | 0.157634 | 0.012884707 |
| chr18 | 28400001 | 28500000 | 1001 | 810  | 28450000 | 0.233076 | 0.000509863 |
| chr18 | 28450001 | 28550000 | 1059 | 914  | 28500000 | 0.140065 | 0.02371204  |
| chr18 | 28650001 | 28750000 | 1049 | 917  | 28700000 | 0.121649 | 0.042449763 |
| chr18 | 28700001 | 28800000 | 1034 | 876  | 28750000 | 0.166862 | 0.009154655 |
| chr18 | 29400001 | 29500000 | 978  | 814  | 29450000 | 0.192434 | 0.003285904 |
| chr18 | 29450001 | 29550000 | 827  | 719  | 29500000 | 0.129524 | 0.033328409 |
| chr18 | 29550001 | 29650000 | 829  | 685  | 29600000 | 0.202896 | 0.002090787 |
| chr18 | 29800001 | 29900000 | 910  | 947  | 29850000 | -0.12987 | 0.03266445  |
| chr18 | 30100001 | 30200000 | 1032 | 896  | 30150000 | 0.131501 | 0.031312581 |
| chr18 | 30250001 | 30350000 | 1117 | 963  | 30300000 | 0.14165  | 0.022491666 |
| chr18 | 30450001 | 30550000 | 1076 | 901  | 30500000 | 0.183707 | 0.004721449 |
| chr18 | 30500001 | 30600000 | 1077 | 903  | 30550000 | 0.181849 | 0.005091658 |
| chr18 | 30550001 | 30650000 | 1064 | 891  | 30600000 | 0.183629 | 0.004736536 |
| chr18 | 30750001 | 30850000 | 1051 | 920  | 30800000 | 0.119685 | 0.045015931 |
| chr18 | 30800001 | 30900000 | 1012 | 839  | 30850000 | 0.198095 | 0.002578988 |
| chr18 | 30850001 | 30950000 | 937  | 817  | 30900000 | 0.125341 | 0.037948065 |
| chr18 | 31200001 | 31300000 | 1087 | 926  | 31250000 | 0.158896 | 0.012306942 |
| chr18 | 31600001 | 31700000 | 1060 | 922  | 31650000 | 0.128854 | 0.034035471 |
| chr18 | 31650001 | 31750000 | 960  | 823  | 31700000 | 0.14977  | 0.017041248 |
| chr18 | 31700001 | 31800000 | 975  | 790  | 31750000 | 0.231178 | 0.000559808 |
| chr18 | 31750001 | 31850000 | 1027 | 890  | 31800000 | 0.134187 | 0.028736089 |
| chr18 | 33300001 | 33400000 | 833  | 911  | 33350000 | -0.20151 | 0.002154441 |
| chr18 | 33550001 | 33650000 | 984  | 859  | 33600000 | 0.123628 | 0.039985404 |
| chr18 | 34550001 | 34650000 | 1007 | 868  | 34600000 | 0.141925 | 0.022285241 |
| chr18 | 34600001 | 34700000 | 838  | 725  | 34650000 | 0.136597 | 0.026577503 |
| chr18 | 34800001 | 34900000 | 1086 | 1176 | 34850000 | -0.18724 | 0.003982001 |
| chr18 | 34850001 | 34950000 | 1059 | 1148 | 34900000 | -0.18879 | 0.003730605 |
| chr18 | 34900001 | 35000000 | 1106 | 1182 | 34950000 | -0.16825 | 0.008522485 |
| chr18 | 34950001 | 35050000 | 1185 | 1253 | 3.50E+07 | -0.15287 | 0.015062524 |
| chr18 | 35000001 | 35100000 | 1209 | 1249 | 35050000 | -0.11933 | 0.045157852 |
| chr18 | 35150001 | 35250000 | 1064 | 1107 | 35200000 | -0.12953 | 0.033018305 |
| chr18 | 35300001 | 35400000 | 1033 | 1096 | 35350000 | -0.15778 | 0.012616447 |
| chr18 | 35600001 | 35700000 | 1066 | 921  | 35650000 | 0.138563 | 0.02491976  |
| chr18 | 36400001 | 36500000 | 1075 | 933  | 36450000 | 0.132016 | 0.030804017 |
| chr18 | 36450001 | 36550000 | 1054 | 862  | 36500000 | 0.217743 | 0.001065213 |
| chr18 | 36500001 | 36600000 | 1056 | 916  | 36550000 | 0.132819 | 0.030025595 |
| chr18 | 36700001 | 36800000 | 998  | 874  | 36750000 | 0.119035 | 0.045892758 |
| chr18 | 36850001 | 36950000 | 1073 | 931  | 36900000 | 0.132425 | 0.030404977 |
| chr18 | 37500001 | 37600000 | 978  | 846  | 37550000 | 0.136805 | 0.026398157 |
| chr18 | 37550001 | 37650000 | 1043 | 903  | 37600000 | 0.135569 | 0.027480906 |
| chr18 | 38150001 | 38250000 | 1041 | 894  | 38200000 | 0.147252 | 0.018595621 |
| chr18 | 38200001 | 38300000 | 993  | 862  | 38250000 | 0.131734 | 0.031081279 |
| chr18 | 38400001 | 38500000 | 971  | 847  | 38450000 | 0.124738 | 0.038656171 |
| chr18 | 38450001 | 38550000 | 1087 | 903  | 38500000 | 0.195182 | 0.002923351 |
| chr18 | 38500001 | 38600000 | 1122 | 902  | 38550000 | 0.242502 | 0.000317649 |
| chr18 | 38550001 | 38650000 | 1103 | 941  | 38600000 | 0.156794 | 0.013281854 |

|       |          |          |      |      |          |          |             |
|-------|----------|----------|------|------|----------|----------|-------------|
| chr18 | 39900001 | 40000000 | 1011 | 863  | 39950000 | 0.155979 | 0.013677856 |
| chr18 | 40200001 | 40300000 | 988  | 859  | 40250000 | 0.129481 | 0.033373055 |
| chr18 | 40450001 | 40550000 | 1075 | 927  | 40500000 | 0.141324 | 0.02273829  |
| chr18 | 40650001 | 40750000 | 1020 | 889  | 40700000 | 0.125942 | 0.037253811 |
| chr18 | 40700001 | 40800000 | 1045 | 840  | 40750000 | 0.24267  | 0.000314931 |
| chr18 | 40750001 | 40850000 | 1011 | 805  | 40800000 | 0.256351 | 0.000154117 |
| chr18 | 40800001 | 40900000 | 958  | 797  | 40850000 | 0.193074 | 0.003197995 |
| chr18 | 41100001 | 41200000 | 1035 | 905  | 41150000 | 0.121269 | 0.042936711 |
| chr18 | 41150001 | 41250000 | 1015 | 861  | 41200000 | 0.165023 | 0.009811441 |
| chr18 | 41200001 | 41300000 | 1002 | 876  | 41250000 | 0.121508 | 0.042630326 |
| chr18 | 41250001 | 41350000 | 989  | 856  | 41300000 | 0.135988 | 0.027110105 |
| chr18 | 41550001 | 41650000 | 1015 | 831  | 41600000 | 0.216188 | 0.001145272 |
| chr18 | 41600001 | 41700000 | 1071 | 921  | 41650000 | 0.145314 | 0.019872624 |
| chr18 | 41850001 | 41950000 | 840  | 723  | 41900000 | 0.144022 | 0.020764694 |
| chr18 | 43600001 | 43700000 | 870  | 763  | 43650000 | 0.116961 | 0.048781545 |
| chr18 | 43650001 | 43750000 | 862  | 728  | 43700000 | 0.171378 | 0.00770295  |
| chr18 | 43700001 | 43800000 | 865  | 745  | 43750000 | 0.143088 | 0.021430693 |
| chr18 | 43900001 | 44000000 | 1070 | 1165 | 43950000 | -0.19509 | 0.002852424 |
| chr18 | 43950001 | 44050000 | 1042 | 1146 | 4.40E+07 | -0.20962 | 0.001494679 |
| chr18 | 44000001 | 44100000 | 1060 | 1170 | 44050000 | -0.21482 | 0.001175687 |
| chr18 | 44050001 | 44150000 | 1118 | 1219 | 44100000 | -0.19715 | 0.002608851 |
| chr18 | 44100001 | 44200000 | 1097 | 1158 | 44150000 | -0.15044 | 0.016416524 |
| chr18 | 44800001 | 44900000 | 1019 | 1061 | 44850000 | -0.13064 | 0.031873747 |
| chr18 | 45200001 | 45300000 | 1075 | 1134 | 45250000 | -0.14946 | 0.016996624 |
| chr18 | 45250001 | 45350000 | 1055 | 1097 | 45300000 | -0.12869 | 0.033900312 |
| chr18 | 45450001 | 45550000 | 989  | 1020 | 45500000 | -0.1169  | 0.0485308   |
| chr18 | 45800001 | 45900000 | 1071 | 1178 | 45850000 | -0.20975 | 0.001485858 |
| chr18 | 46100001 | 46200000 | 1043 | 1089 | 46150000 | -0.13464 | 0.028035259 |
| chr18 | 46150001 | 46250000 | 1005 | 1143 | 46200000 | -0.258   | 0.000132498 |
| chr18 | 46200001 | 46300000 | 1138 | 1179 | 46250000 | -0.12343 | 0.039897899 |
| chr18 | 46350001 | 46450000 | 1090 | 1127 | 46400000 | -0.12053 | 0.043564771 |
| chr18 | 47200001 | 47300000 | 844  | 882  | 47250000 | -0.13591 | 0.026897995 |
| chr18 | 47250001 | 47350000 | 806  | 882  | 47300000 | -0.20237 | 0.002073344 |
| chr18 | 47300001 | 47400000 | 877  | 962  | 47350000 | -0.20583 | 0.001775648 |
| chr18 | 47450001 | 47550000 | 1061 | 1153 | 47500000 | -0.19234 | 0.003210002 |
| chr18 | 47600001 | 47700000 | 999  | 1048 | 47650000 | -0.14145 | 0.022376629 |
| chr18 | 47750001 | 47850000 | 945  | 988  | 47800000 | -0.13657 | 0.02632186  |
| chr18 | 47800001 | 47900000 | 879  | 913  | 47850000 | -0.12712 | 0.035606763 |
| chr18 | 48600001 | 48700000 | 934  | 813  | 48650000 | 0.127795 | 0.035177709 |
| chr18 | 49250001 | 49350000 | 1030 | 900  | 49300000 | 0.122276 | 0.041656805 |
| chr18 | 49300001 | 49400000 | 1015 | 883  | 49350000 | 0.128623 | 0.03428236  |
| chr18 | 49800001 | 49900000 | 990  | 1031 | 49850000 | -0.13092 | 0.031597912 |
| chr18 | 50800001 | 50900000 | 996  | 867  | 50850000 | 0.127742 | 0.035236218 |
| chr18 | 50950001 | 51050000 | 905  | 781  | 5.10E+07 | 0.140223 | 0.023587361 |
| chr18 | 51000001 | 51100000 | 917  | 785  | 51050000 | 0.151857 | 0.015838954 |
| chr18 | 52050001 | 52150000 | 115  | 94   | 52100000 | 0.218529 | 0.001026748 |
| chr18 | 52400001 | 52500000 | 1036 | 900  | 52450000 | 0.130655 | 0.03216178  |

|       |          |          |      |      |          |          |             |
|-------|----------|----------|------|------|----------|----------|-------------|
| chr18 | 52450001 | 52550000 | 1029 | 896  | 52500000 | 0.127301 | 0.035722484 |
| chr18 | 52500001 | 52600000 | 1056 | 903  | 52550000 | 0.15344  | 0.014976492 |
| chr18 | 52650001 | 52750000 | 1060 | 908  | 52700000 | 0.150928 | 0.016364797 |
| chr18 | 52700001 | 52800000 | 1129 | 961  | 52750000 | 0.160065 | 0.011791946 |
| chr18 | 53250001 | 53350000 | 1025 | 893  | 53300000 | 0.12652  | 0.03659583  |
| chr18 | 53300001 | 53400000 | 953  | 803  | 53350000 | 0.174704 | 0.006767551 |
| chr18 | 53350001 | 53450000 | 968  | 833  | 53400000 | 0.144319 | 0.020556719 |
| chr18 | 54050001 | 54150000 | 1002 | 879  | 54100000 | 0.116576 | 0.04933333  |
| chr18 | 54600001 | 54700000 | 1107 | 953  | 54650000 | 0.143735 | 0.020967151 |
| chr18 | 54950001 | 55050000 | 1036 | 1084 | 5.50E+07 | -0.13771 | 0.02534922  |
| chr18 | 55050001 | 55150000 | 1035 | 1078 | 55100000 | -0.1311  | 0.031414813 |
| chr18 | 55100001 | 55200000 | 992  | 1066 | 55150000 | -0.17617 | 0.00625388  |
| chr18 | 55150001 | 55250000 | 974  | 1007 | 55200000 | -0.12044 | 0.043681819 |
| chr18 | 55350001 | 55450000 | 795  | 842  | 55400000 | -0.15524 | 0.013836586 |
| chr18 | 55400001 | 55500000 | 903  | 950  | 55450000 | -0.14557 | 0.019450024 |
| chr18 | 56300001 | 56400000 | 1010 | 880  | 56350000 | 0.126408 | 0.036722537 |
| chr18 | 56600001 | 56700000 | 1003 | 876  | 56650000 | 0.122947 | 0.040820287 |
| chr18 | 56650001 | 56750000 | 1055 | 921  | 56700000 | 0.123598 | 0.040022169 |
| chr18 | 57400001 | 57500000 | 834  | 872  | 57450000 | -0.13665 | 0.026249363 |
| chr18 | 57450001 | 57550000 | 819  | 890  | 57500000 | -0.19231 | 0.003213562 |
| chr18 | 57800001 | 57900000 | 1063 | 916  | 57850000 | 0.14235  | 0.021969401 |
| chr18 | 57850001 | 57950000 | 1049 | 907  | 57900000 | 0.137468 | 0.025831693 |
| chr18 | 58050001 | 58150000 | 1004 | 857  | 58100000 | 0.15602  | 0.0136574   |
| chr18 | 58100001 | 58200000 | 1012 | 828  | 58150000 | 0.217135 | 0.001095891 |
| chr18 | 58150001 | 58250000 | 1052 | 899  | 58200000 | 0.15437  | 0.014489029 |
| chr18 | 58200001 | 58300000 | 1005 | 873  | 58250000 | 0.13077  | 0.032045288 |
| chr18 | 58300001 | 58400000 | 1042 | 910  | 58350000 | 0.123045 | 0.040699342 |
| chr18 | 58350001 | 58450000 | 1054 | 848  | 58400000 | 0.241367 | 0.000336544 |
| chr18 | 58400001 | 58500000 | 1001 | 830  | 58450000 | 0.197887 | 0.002602286 |
| chr18 | 58850001 | 58950000 | 983  | 1016 | 58900000 | -0.12001 | 0.044252397 |
| chr18 | 60200001 | 60300000 | 961  | 1005 | 60250000 | -0.13696 | 0.025986448 |
| chr18 | 60350001 | 60450000 | 1006 | 845  | 60400000 | 0.179235 | 0.005656006 |
| chr18 | 60400001 | 60500000 | 1050 | 864  | 60450000 | 0.208914 | 0.001598128 |
| chr18 | 60650001 | 60750000 | 1021 | 1061 | 60700000 | -0.12781 | 0.03484763  |
| chr18 | 60700001 | 60800000 | 1024 | 1098 | 60750000 | -0.17303 | 0.00707821  |
| chr18 | 61250001 | 61350000 | 887  | 769  | 61300000 | 0.133579 | 0.029303536 |
| chr18 | 61300001 | 61400000 | 870  | 751  | 61350000 | 0.139831 | 0.023896884 |
| chr18 | 61700001 | 61800000 | 1040 | 912  | 61750000 | 0.117106 | 0.04857432  |
| chr18 | 61900001 | 62000000 | 974  | 1029 | 61950000 | -0.15162 | 0.015747217 |
| chr18 | 61950001 | 62050000 | 960  | 1005 | 6.20E+07 | -0.13846 | 0.024729386 |
| chr18 | 62150001 | 62250000 | 986  | 838  | 62200000 | 0.162266 | 0.010873601 |
| chr18 | 62200001 | 62300000 | 957  | 828  | 62250000 | 0.136516 | 0.026647851 |
| chr18 | 62400001 | 62500000 | 933  | 970  | 62450000 | -0.12848 | 0.034127814 |
| chr18 | 62550001 | 62650000 | 1028 | 838  | 62600000 | 0.222446 | 0.000853456 |
| chr18 | 62600001 | 62700000 | 1052 | 856  | 62650000 | 0.22508  | 0.000752563 |
| chr18 | 62800001 | 62900000 | 1013 | 868  | 62850000 | 0.150495 | 0.016614871 |
| chr18 | 62850001 | 62950000 | 1068 | 934  | 62900000 | 0.121045 | 0.043225738 |

|       |          |          |      |     |          |          |             |
|-------|----------|----------|------|-----|----------|----------|-------------|
| chr18 | 63100001 | 63200000 | 1009 | 838 | 63150000 | 0.195532 | 0.00287988  |
| chr18 | 63150001 | 63250000 | 970  | 847 | 63200000 | 0.123251 | 0.040446114 |
| chr18 | 63350001 | 63450000 | 1014 | 876 | 63400000 | 0.138683 | 0.024821004 |
| chr18 | 63450001 | 63550000 | 1023 | 888 | 63500000 | 0.131803 | 0.031013486 |
| chr18 | 63500001 | 63600000 | 1037 | 883 | 63550000 | 0.159559 | 0.012012716 |
| chr18 | 64150001 | 64250000 | 1047 | 902 | 64200000 | 0.14269  | 0.021719669 |
| chr18 | 64300001 | 64400000 | 965  | 813 | 64350000 | 0.174902 | 0.006715365 |
| chr18 | 64350001 | 64450000 | 946  | 793 | 64400000 | 0.182148 | 0.005030415 |
| chr18 | 64400001 | 64500000 | 1048 | 877 | 64450000 | 0.184618 | 0.004548972 |
| chr18 | 64450001 | 64550000 | 1083 | 896 | 64500000 | 0.201091 | 0.002263528 |
| chr18 | 64500001 | 64600000 | 1042 | 910 | 64550000 | 0.123045 | 0.040699342 |
| chr18 | 64550001 | 64650000 | 1028 | 895 | 64600000 | 0.127509 | 0.035492295 |
| chr18 | 64600001 | 64700000 | 1035 | 867 | 64650000 | 0.183155 | 0.004828835 |
| chr18 | 64650001 | 64750000 | 965  | 846 | 64700000 | 0.1175   | 0.04801728  |
| chr18 | 65050001 | 65150000 | 1023 | 867 | 65100000 | 0.16633  | 0.009340287 |
| chr18 | 65150001 | 65250000 | 1068 | 926 | 65200000 | 0.133456 | 0.029419338 |
| chr18 | 65400001 | 65500000 | 1085 | 868 | 65450000 | 0.249556 | 0.000220671 |
| chr18 | 65450001 | 65550000 | 1115 | 898 | 65500000 | 0.239885 | 0.00036281  |
| chr18 | 65500001 | 65600000 | 993  | 849 | 65550000 | 0.153657 | 0.014861354 |
| chr18 | 65550001 | 65650000 | 984  | 853 | 65600000 | 0.133741 | 0.029151481 |
| chr18 | 65650001 | 65750000 | 1020 | 870 | 65700000 | 0.15711  | 0.013131274 |
| chr18 | 65700001 | 65800000 | 1025 | 868 | 65750000 | 0.167485 | 0.008940876 |
| chr18 | 65750001 | 65850000 | 1022 | 827 | 65800000 | 0.233064 | 0.000510171 |
| chr18 | 65800001 | 65900000 | 1029 | 851 | 65850000 | 0.20164  | 0.002209645 |
| chr18 | 66250001 | 66350000 | 931  | 967 | 66300000 | -0.12711 | 0.035625604 |
| chr18 | 66450001 | 66550000 | 955  | 833 | 66500000 | 0.124812 | 0.038567713 |
| chr18 | 66500001 | 66600000 | 1022 | 862 | 66550000 | 0.173264 | 0.007159538 |
| chr18 | 66550001 | 66650000 | 1063 | 903 | 66600000 | 0.162972 | 0.010592356 |
| chr18 | 66600001 | 66700000 | 1073 | 899 | 66650000 | 0.182885 | 0.004882095 |
| chr18 | 66650001 | 66750000 | 1057 | 888 | 66700000 | 0.178972 | 0.00571584  |
| chr18 | 66700001 | 66800000 | 1048 | 875 | 66750000 | 0.187912 | 0.003971425 |
| chr18 | 66800001 | 66900000 | 1054 | 904 | 66850000 | 0.149108 | 0.017438469 |
| chr18 | 66850001 | 66950000 | 993  | 838 | 66900000 | 0.172472 | 0.007383447 |
| chr18 | 66900001 | 67000000 | 974  | 843 | 66950000 | 0.136017 | 0.027084197 |
| chr18 | 66950001 | 67050000 | 1001 | 867 | 6.70E+07 | 0.134966 | 0.028022859 |
| chr18 | 67100001 | 67200000 | 980  | 853 | 67150000 | 0.127864 | 0.035102502 |
| chr18 | 67150001 | 67250000 | 1043 | 895 | 67200000 | 0.148408 | 0.01786762  |
| chr18 | 67400001 | 67500000 | 1009 | 883 | 67450000 | 0.120069 | 0.044504702 |
| chr18 | 68100001 | 68200000 | 926  | 959 | 68150000 | -0.12289 | 0.040565701 |
| chr18 | 68300001 | 68400000 | 861  | 923 | 68350000 | -0.17269 | 0.007174593 |
| chr18 | 68350001 | 68450000 | 779  | 807 | 68400000 | -0.12332 | 0.040041619 |
| chr18 | 68550001 | 68650000 | 1002 | 875 | 68600000 | 0.123156 | 0.040562997 |
| chr18 | 68600001 | 68700000 | 1049 | 898 | 68650000 | 0.151856 | 0.015839932 |
| chr18 | 68650001 | 68750000 | 1074 | 866 | 68700000 | 0.238183 | 0.000395307 |
| chr18 | 68700001 | 68800000 | 999  | 793 | 68750000 | 0.260792 | 0.000121357 |
| chr18 | 69100001 | 69200000 | 982  | 847 | 69150000 | 0.140989 | 0.022993559 |
| chr18 | 69150001 | 69250000 | 1024 | 888 | 69200000 | 0.133212 | 0.029649711 |

|       |          |          |      |      |          |          |             |
|-------|----------|----------|------|------|----------|----------|-------------|
| chr18 | 69400001 | 69500000 | 1017 | 877  | 69450000 | 0.141299 | 0.022756901 |
| chr18 | 69450001 | 69550000 | 999  | 821  | 69500000 | 0.210731 | 0.001471806 |
| chr18 | 69500001 | 69600000 | 1015 | 875  | 69550000 | 0.141753 | 0.02241399  |
| chr18 | 69700001 | 69800000 | 1061 | 900  | 69750000 | 0.165056 | 0.009799239 |
| chr18 | 69850001 | 69950000 | 975  | 828  | 69900000 | 0.1634   | 0.010425139 |
| chr18 | 69900001 | 70000000 | 986  | 862  | 69950000 | 0.121528 | 0.042604676 |
| chr18 | 70250001 | 70350000 | 1082 | 909  | 70300000 | 0.178977 | 0.005714811 |
| chr18 | 70900001 | 71000000 | 987  | 842  | 70950000 | 0.156858 | 0.013251355 |
| chr18 | 70950001 | 71050000 | 988  | 839  | 7.10E+07 | 0.163468 | 0.010398468 |
| chr18 | 71000001 | 71100000 | 1059 | 921  | 71050000 | 0.129058 | 0.033818957 |
| chr18 | 71050001 | 71150000 | 972  | 851  | 71100000 | 0.119425 | 0.045364451 |
| chr18 | 71100001 | 71200000 | 975  | 822  | 71150000 | 0.173892 | 0.006986168 |
| chr18 | 71150001 | 71250000 | 1045 | 850  | 71200000 | 0.225596 | 0.00073413  |
| chr18 | 71200001 | 71300000 | 1033 | 857  | 71250000 | 0.197101 | 0.002692078 |
| chr18 | 72050001 | 72150000 | 1037 | 1078 | 72100000 | -0.12831 | 0.034306516 |
| chr18 | 72100001 | 72200000 | 970  | 1024 | 72150000 | -0.15053 | 0.016366059 |
| chr18 | 72150001 | 72250000 | 967  | 1015 | 72200000 | -0.14226 | 0.02177358  |
| chr18 | 72700001 | 72800000 | 1037 | 1075 | 72750000 | -0.12429 | 0.038864347 |
| chr18 | 72750001 | 72850000 | 1083 | 1134 | 72800000 | -0.13876 | 0.024485996 |
| chr18 | 72800001 | 72900000 | 1068 | 1168 | 72850000 | -0.2015  | 0.002155007 |
| chr18 | 73150001 | 73250000 | 1021 | 1064 | 73200000 | -0.13189 | 0.030633469 |
| chr18 | 74050001 | 74150000 | 1085 | 1143 | 74100000 | -0.1475  | 0.018195841 |
| chr18 | 74350001 | 74450000 | 859  | 916  | 74400000 | -0.16506 | 0.009623859 |
| chr18 | 74400001 | 74500000 | 870  | 902  | 74450000 | -0.12448 | 0.038636846 |
| chr18 | 74500001 | 74600000 | 844  | 916  | 74550000 | -0.19048 | 0.003474625 |
| chr18 | 74550001 | 74650000 | 941  | 1029 | 74600000 | -0.20135 | 0.002169594 |
| chr18 | 74600001 | 74700000 | 977  | 1041 | 74650000 | -0.16391 | 0.010050513 |
| chr18 | 74750001 | 74850000 | 1085 | 1134 | 74800000 | -0.1361  | 0.026731384 |
| chr18 | 74950001 | 75050000 | 900  | 931  | 7.50E+07 | -0.12123 | 0.042660912 |
| chr18 | 75050001 | 75150000 | 878  | 954  | 75100000 | -0.19214 | 0.003237444 |
| chr18 | 75100001 | 75200000 | 913  | 993  | 75150000 | -0.19355 | 0.003047905 |
| chr18 | 75150001 | 75250000 | 956  | 999  | 75200000 | -0.13585 | 0.026952213 |
| chr18 | 75200001 | 75300000 | 868  | 940  | 75250000 | -0.18734 | 0.003965108 |
| chr18 | 75250001 | 75350000 | 866  | 966  | 75300000 | -0.23003 | 0.000566004 |
| chr18 | 75550001 | 75650000 | 1058 | 1118 | 75600000 | -0.15195 | 0.01556322  |
| chr18 | 75750001 | 75850000 | 813  | 857  | 75800000 | -0.14841 | 0.017628849 |
| chr18 | 75800001 | 75900000 | 1076 | 1134 | 75850000 | -0.14811 | 0.017812499 |
| chr18 | 75850001 | 75950000 | 1067 | 1102 | 75900000 | -0.11894 | 0.045692589 |
| chr18 | 76100001 | 76200000 | 950  | 1025 | 76150000 | -0.182   | 0.004944075 |
| chr18 | 76150001 | 76250000 | 1005 | 1087 | 76200000 | -0.18553 | 0.004275271 |
| chr18 | 76200001 | 76300000 | 974  | 1052 | 76250000 | -0.18351 | 0.004646227 |
| chr18 | 76250001 | 76350000 | 1029 | 1102 | 76300000 | -0.17125 | 0.007588486 |
| chr18 | 76300001 | 76400000 | 1093 | 1163 | 76350000 | -0.16193 | 0.01082481  |
| chr18 | 76350001 | 76450000 | 1047 | 1186 | 76400000 | -0.25221 | 0.000180982 |
| chr18 | 76400001 | 76500000 | 1072 | 1149 | 76450000 | -0.17245 | 0.007243336 |
| chr18 | 76650001 | 76750000 | 1008 | 1049 | 76700000 | -0.12989 | 0.032642585 |
| chr18 | 76700001 | 76800000 | 942  | 1006 | 76750000 | -0.1672  | 0.00887128  |

|       |          |          |      |      |          |          |             |
|-------|----------|----------|------|------|----------|----------|-------------|
| chr18 | 77050001 | 77150000 | 976  | 1052 | 77100000 | -0.18055 | 0.005243161 |
| chr18 | 77100001 | 77200000 | 956  | 1188 | 77150000 | -0.38582 | 3.04E-08    |
| chr18 | 77150001 | 77250000 | 1012 | 1319 | 77200000 | -0.45461 | 1.08E-10    |
| chr18 | 77200001 | 77300000 | 1011 | 1215 | 77250000 | -0.33755 | 1.00E-06    |
| chr18 | 77250001 | 77350000 | 1024 | 1129 | 77300000 | -0.2132  | 0.001267453 |
| chr18 | 77300001 | 77400000 | 981  | 1105 | 77350000 | -0.24409 | 0.000277534 |
| chr18 | 77350001 | 77450000 | 941  | 1001 | 77400000 | -0.16155 | 0.010980036 |
| chr18 | 77400001 | 77500000 | 1014 | 1051 | 77450000 | -0.12408 | 0.039122279 |
| chr18 | 77450001 | 77550000 | 1039 | 1117 | 77500000 | -0.17681 | 0.006096834 |
| chr18 | 77500001 | 77600000 | 1011 | 1116 | 77550000 | -0.21493 | 0.001169675 |
| chr18 | 77550001 | 77650000 | 1007 | 1122 | 77600000 | -0.22838 | 0.000613851 |
| chr18 | 77600001 | 77700000 | 975  | 1123 | 77650000 | -0.27626 | 4.77E-05    |
| chr18 | 77650001 | 77750000 | 954  | 1063 | 77700000 | -0.22845 | 0.0006117   |
| chr18 | 77800001 | 77900000 | 952  | 1035 | 77850000 | -0.19297 | 0.003124804 |
| chr18 | 78000001 | 78100000 | 147  | 189  | 78050000 | -0.43494 | 5.85E-10    |
| chr3  | 1        | 100000   | 193  | 158  | 50000    | 0.216305 | 0.001139067 |
| chr3  | 50001    | 150000   | 713  | 596  | 1.00E+05 | 0.186218 | 0.004259674 |
| chr3  | 1150001  | 1250000  | 1099 | 946  | 1200000  | 0.143908 | 0.020845301 |
| chr3  | 1200001  | 1300000  | 1014 | 887  | 1250000  | 0.12068  | 0.043701048 |
| chr3  | 1250001  | 1350000  | 1004 | 839  | 1300000  | 0.186645 | 0.004185334 |
| chr3  | 1300001  | 1400000  | 1085 | 918  | 1350000  | 0.168757 | 0.008518343 |
| chr3  | 1450001  | 1550000  | 955  | 835  | 1500000  | 0.121353 | 0.04282936  |
| chr3  | 1500001  | 1600000  | 992  | 856  | 1550000  | 0.140358 | 0.023482471 |
| chr3  | 1550001  | 1650000  | 1085 | 940  | 1600000  | 0.134591 | 0.028364906 |
| chr3  | 1600001  | 1700000  | 979  | 847  | 1650000  | 0.136575 | 0.026596884 |
| chr3  | 2200001  | 2300000  | 905  | 934  | 2250000  | -0.11788 | 0.047151141 |
| chr3  | 2600001  | 2700000  | 990  | 1042 | 2650000  | -0.14623 | 0.019017213 |
| chr3  | 2650001  | 2750000  | 940  | 1006 | 2700000  | -0.17027 | 0.00788398  |
| chr3  | 3100001  | 3200000  | 1025 | 885  | 3150000  | 0.139503 | 0.024157951 |
| chr3  | 3600001  | 3700000  | 1018 | 1053 | 3650000  | -0.12114 | 0.042774594 |
| chr3  | 3750001  | 3850000  | 933  | 962  | 3800000  | -0.11653 | 0.049056657 |
| chr3  | 4500001  | 4600000  | 992  | 1040 | 4550000  | -0.14054 | 0.023071575 |
| chr3  | 4650001  | 4750000  | 1033 | 1074 | 4700000  | -0.12853 | 0.034078466 |
| chr3  | 5200001  | 5300000  | 909  | 981  | 5250000  | -0.18234 | 0.004874189 |
| chr3  | 5550001  | 5650000  | 966  | 842  | 5600000  | 0.125831 | 0.037381128 |
| chr3  | 5600001  | 5700000  | 1078 | 909  | 5650000  | 0.173633 | 0.007057125 |
| chr3  | 6350001  | 6450000  | 908  | 787  | 6400000  | 0.133957 | 0.028949767 |
| chr3  | 6400001  | 6500000  | 962  | 841  | 6450000  | 0.121559 | 0.042564625 |
| chr3  | 7500001  | 7600000  | 943  | 977  | 7550000  | -0.12347 | 0.039852083 |
| chr3  | 8450001  | 8550000  | 1106 | 946  | 8500000  | 0.153068 | 0.015175805 |
| chr3  | 8650001  | 8750000  | 785  | 858  | 8700000  | -0.20066 | 0.002236958 |
| chr3  | 8700001  | 8800000  | 815  | 874  | 8750000  | -0.1732  | 0.007030886 |
| chr3  | 8800001  | 8900000  | 1045 | 1091 | 8850000  | -0.13452 | 0.028141616 |
| chr3  | 9000001  | 9100000  | 1067 | 1193 | 9050000  | -0.23341 | 0.000478511 |
| chr3  | 9050001  | 9150000  | 997  | 1133 | 9100000  | -0.25685 | 0.000141015 |
| chr3  | 9100001  | 9200000  | 1007 | 1095 | 9150000  | -0.19324 | 0.003088902 |
| chr3  | 9150001  | 9250000  | 1038 | 1082 | 9200000  | -0.13227 | 0.030264085 |

|      |          |          |      |      |          |          |             |
|------|----------|----------|------|------|----------|----------|-------------|
| chr3 | 9700001  | 9800000  | 1029 | 1108 | 9750000  | -0.17909 | 0.00556364  |
| chr3 | 9750001  | 9850000  | 997  | 1055 | 9800000  | -0.15395 | 0.014492697 |
| chr3 | 9800001  | 9900000  | 894  | 927  | 9850000  | -0.12467 | 0.038420817 |
| chr3 | 10100001 | 10200000 | 775  | 672  | 10150000 | 0.133363 | 0.029506678 |
| chr3 | 10350001 | 10450000 | 1140 | 1202 | 10400000 | -0.14877 | 0.017406673 |
| chr3 | 10400001 | 10500000 | 1144 | 1219 | 10450000 | -0.16398 | 0.010023519 |
| chr3 | 10800001 | 10900000 | 1063 | 1156 | 10850000 | -0.19337 | 0.003071397 |
| chr3 | 10850001 | 10950000 | 1041 | 1169 | 10900000 | -0.23968 | 0.000348458 |
| chr3 | 10900001 | 11000000 | 1105 | 1188 | 10950000 | -0.17686 | 0.006083479 |
| chr3 | 10950001 | 11050000 | 1166 | 1235 | 1.10E+07 | -0.15532 | 0.013797744 |
| chr3 | 11000001 | 11100000 | 1094 | 1132 | 11050000 | -0.12163 | 0.042142506 |
| chr3 | 11050001 | 11150000 | 945  | 1013 | 11100000 | -0.17262 | 0.007194144 |
| chr3 | 11100001 | 11200000 | 948  | 1019 | 11150000 | -0.17657 | 0.006155102 |
| chr3 | 11150001 | 11250000 | 1014 | 1110 | 11200000 | -0.20287 | 0.002027415 |
| chr3 | 11800001 | 11900000 | 891  | 931  | 11850000 | -0.13573 | 0.027056618 |
| chr3 | 11850001 | 11950000 | 685  | 733  | 11900000 | -0.17008 | 0.007941734 |
| chr3 | 11900001 | 12000000 | 651  | 701  | 11950000 | -0.17913 | 0.005554225 |
| chr3 | 12850001 | 12950000 | 916  | 975  | 12900000 | -0.16243 | 0.010625933 |
| chr3 | 12900001 | 13000000 | 1045 | 1187 | 12950000 | -0.25619 | 0.000146187 |
| chr3 | 12950001 | 13050000 | 1129 | 1213 | 1.30E+07 | -0.17591 | 0.006319229 |
| chr3 | 13000001 | 13100000 | 1134 | 1198 | 13050000 | -0.15158 | 0.015770699 |
| chr3 | 13050001 | 13150000 | 1151 | 1284 | 13100000 | -0.23013 | 0.00056318  |
| chr3 | 13100001 | 13200000 | 1087 | 1201 | 13150000 | -0.21626 | 0.00109903  |
| chr3 | 13150001 | 13250000 | 1062 | 1120 | 13200000 | -0.14909 | 0.017217808 |
| chr3 | 13250001 | 13350000 | 1051 | 1153 | 13300000 | -0.206   | 0.001762101 |
| chr3 | 13300001 | 13400000 | 992  | 1174 | 13350000 | -0.31539 | 4.37E-06    |
| chr3 | 13350001 | 13450000 | 1069 | 1149 | 13400000 | -0.17649 | 0.006174305 |
| chr3 | 13450001 | 13550000 | 886  | 950  | 13500000 | -0.17299 | 0.007089752 |
| chr3 | 13500001 | 13600000 | 1044 | 1134 | 13550000 | -0.19167 | 0.003302837 |
| chr3 | 13550001 | 13650000 | 1045 | 1181 | 13600000 | -0.24888 | 0.000216042 |
| chr3 | 13600001 | 13700000 | 1078 | 1255 | 13650000 | -0.2917  | 1.92E-05    |
| chr3 | 13650001 | 13750000 | 1157 | 1312 | 13700000 | -0.25375 | 0.000166701 |
| chr3 | 13700001 | 13800000 | 1038 | 1104 | 13750000 | -0.16131 | 0.011079125 |
| chr3 | 13800001 | 13900000 | 1166 | 1220 | 13850000 | -0.13769 | 0.025372152 |
| chr3 | 13850001 | 13950000 | 1144 | 1256 | 13900000 | -0.20712 | 0.00167511  |
| chr3 | 14250001 | 14350000 | 1073 | 1136 | 14300000 | -0.15468 | 0.014114923 |
| chr3 | 14300001 | 14400000 | 1048 | 1150 | 14350000 | -0.20637 | 0.001733274 |
| chr3 | 14350001 | 14450000 | 1056 | 1107 | 14400000 | -0.14042 | 0.023169241 |
| chr3 | 14400001 | 14500000 | 1059 | 1109 | 14450000 | -0.13893 | 0.024348652 |
| chr3 | 14500001 | 14600000 | 1146 | 1219 | 14550000 | -0.16146 | 0.011014505 |
| chr3 | 14550001 | 14650000 | 1121 | 1250 | 14600000 | -0.22951 | 0.00058056  |
| chr3 | 14750001 | 14850000 | 1028 | 1089 | 14800000 | -0.15554 | 0.013688314 |
| chr3 | 14800001 | 14900000 | 1075 | 1174 | 14850000 | -0.19947 | 0.002357294 |
| chr3 | 14900001 | 15000000 | 1022 | 1063 | 14950000 | -0.12912 | 0.033448896 |
| chr3 | 15500001 | 15600000 | 936  | 976  | 15550000 | -0.13274 | 0.029802681 |
| chr3 | 15600001 | 15700000 | 1008 | 862  | 15650000 | 0.153364 | 0.015016998 |
| chr3 | 15750001 | 15850000 | 1020 | 867  | 15800000 | 0.162093 | 0.01094313  |

|      |          |          |      |      |          |          |             |
|------|----------|----------|------|------|----------|----------|-------------|
| chr3 | 15800001 | 15900000 | 1052 | 911  | 15850000 | 0.13524  | 0.027775875 |
| chr3 | 17300001 | 17400000 | 1080 | 901  | 17350000 | 0.189061 | 0.0037861   |
| chr3 | 17350001 | 17450000 | 1085 | 868  | 17400000 | 0.249556 | 0.000220671 |
| chr3 | 17400001 | 17500000 | 1053 | 916  | 17450000 | 0.128714 | 0.034184433 |
| chr3 | 17450001 | 17550000 | 1044 | 911  | 17500000 | 0.124227 | 0.039263502 |
| chr3 | 17500001 | 17600000 | 1023 | 893  | 17550000 | 0.123702 | 0.03989572  |
| chr3 | 17550001 | 17650000 | 989  | 826  | 17600000 | 0.187457 | 0.00404708  |
| chr3 | 17600001 | 17700000 | 943  | 822  | 17650000 | 0.125748 | 0.037477338 |
| chr3 | 17650001 | 17750000 | 859  | 750  | 17700000 | 0.123396 | 0.040268896 |
| chr3 | 17700001 | 17800000 | 907  | 779  | 17750000 | 0.147107 | 0.018688108 |
| chr3 | 18900001 | 19000000 | 949  | 828  | 18950000 | 0.124406 | 0.039050215 |
| chr3 | 20050001 | 20150000 | 927  | 810  | 20100000 | 0.122276 | 0.041656805 |
| chr3 | 20100001 | 20200000 | 966  | 842  | 20150000 | 0.125831 | 0.037381128 |
| chr3 | 20150001 | 20250000 | 998  | 859  | 20200000 | 0.14401  | 0.020773135 |
| chr3 | 20200001 | 20300000 | 978  | 842  | 20250000 | 0.143642 | 0.02103312  |
| chr3 | 20650001 | 20750000 | 955  | 836  | 20700000 | 0.119626 | 0.045095063 |
| chr3 | 20700001 | 20800000 | 1049 | 881  | 20750000 | 0.179429 | 0.005612341 |
| chr3 | 20750001 | 20850000 | 1036 | 890  | 20800000 | 0.146775 | 0.018902977 |
| chr3 | 20850001 | 20950000 | 964  | 838  | 20900000 | 0.129711 | 0.033132874 |
| chr3 | 20900001 | 21000000 | 1007 | 875  | 20950000 | 0.130337 | 0.032486516 |
| chr3 | 20950001 | 21050000 | 940  | 811  | 2.10E+07 | 0.140587 | 0.023303836 |
| chr3 | 21000001 | 21100000 | 929  | 811  | 21050000 | 0.123605 | 0.040013968 |
| chr3 | 21350001 | 21450000 | 989  | 839  | 21400000 | 0.164928 | 0.009846421 |
| chr3 | 21600001 | 21700000 | 1027 | 868  | 21650000 | 0.170297 | 0.008030323 |
| chr3 | 22050001 | 22150000 | 889  | 772  | 22100000 | 0.131211 | 0.03160158  |
| chr3 | 22100001 | 22200000 | 981  | 848  | 22150000 | 0.137817 | 0.025538113 |
| chr3 | 22150001 | 22250000 | 984  | 844  | 22200000 | 0.149044 | 0.017477831 |
| chr3 | 22200001 | 22300000 | 965  | 842  | 22250000 | 0.124337 | 0.039132053 |
| chr3 | 23250001 | 23350000 | 954  | 834  | 23300000 | 0.12157  | 0.042550834 |
| chr3 | 23750001 | 23850000 | 1022 | 873  | 23800000 | 0.15497  | 0.014181802 |
| chr3 | 23800001 | 23900000 | 1029 | 886  | 23850000 | 0.143493 | 0.021139937 |
| chr3 | 24700001 | 24800000 | 961  | 1002 | 24750000 | -0.13265 | 0.029897116 |
| chr3 | 25750001 | 25850000 | 876  | 915  | 25800000 | -0.13521 | 0.027514862 |
| chr3 | 25850001 | 25950000 | 1047 | 895  | 25900000 | 0.15393  | 0.014717896 |
| chr3 | 26000001 | 26100000 | 946  | 824  | 26050000 | 0.126824 | 0.036253592 |
| chr3 | 26100001 | 26200000 | 961  | 837  | 26150000 | 0.126937 | 0.036127101 |
| chr3 | 26300001 | 26400000 | 993  | 865  | 26350000 | 0.126722 | 0.036368415 |
| chr3 | 26350001 | 26450000 | 926  | 770  | 26400000 | 0.193782 | 0.003103287 |
| chr3 | 26400001 | 26500000 | 999  | 784  | 26450000 | 0.277259 | 4.86E-05    |
| chr3 | 26450001 | 26550000 | 983  | 802  | 26500000 | 0.221217 | 0.00090468  |
| chr3 | 26900001 | 27000000 | 843  | 720  | 26950000 | 0.155164 | 0.014083626 |
| chr3 | 26950001 | 27050000 | 820  | 698  | 2.70E+07 | 0.160025 | 0.011809368 |
| chr3 | 27000001 | 27100000 | 901  | 780  | 27050000 | 0.135681 | 0.0273815   |
| chr3 | 27400001 | 27500000 | 1028 | 896  | 27450000 | 0.125898 | 0.037304525 |
| chr3 | 27450001 | 27550000 | 941  | 785  | 27500000 | 0.18913  | 0.003775097 |
| chr3 | 27500001 | 27600000 | 872  | 705  | 27550000 | 0.234333 | 0.000479115 |
| chr3 | 27850001 | 27950000 | 1009 | 861  | 27900000 | 0.156469 | 0.013438503 |



|      |          |          |      |      |          |          |             |
|------|----------|----------|------|------|----------|----------|-------------|
| chr3 | 27900001 | 28000000 | 1144 | 952  | 27950000 | 0.192682 | 0.003251611 |
| chr3 | 27950001 | 28050000 | 1045 | 913  | 2.80E+07 | 0.122444 | 0.041445259 |
| chr3 | 28450001 | 28550000 | 905  | 784  | 28500000 | 0.134692 | 0.02827192  |
| chr3 | 28500001 | 28600000 | 969  | 838  | 28550000 | 0.137175 | 0.026081284 |
| chr3 | 28550001 | 28650000 | 969  | 1003 | 28600000 | -0.12212 | 0.04151994  |
| chr3 | 28600001 | 28700000 | 983  | 1051 | 28650000 | -0.16887 | 0.008321511 |
| chr3 | 28650001 | 28750000 | 990  | 1030 | 28700000 | -0.12952 | 0.033032037 |
| chr3 | 28700001 | 28800000 | 981  | 1013 | 28750000 | -0.11868 | 0.046040221 |
| chr3 | 29250001 | 29350000 | 1069 | 933  | 29300000 | 0.123941 | 0.039606955 |
| chr3 | 29300001 | 29400000 | 1082 | 921  | 29350000 | 0.160056 | 0.011796145 |
| chr3 | 29650001 | 29750000 | 1042 | 883  | 29700000 | 0.166498 | 0.009281329 |
| chr3 | 29700001 | 29800000 | 995  | 802  | 29750000 | 0.238723 | 0.000384725 |
| chr3 | 30000001 | 30100000 | 860  | 753  | 30050000 | 0.119315 | 0.045513237 |
| chr3 | 30050001 | 30150000 | 1028 | 858  | 30100000 | 0.188419 | 0.003888646 |
| chr3 | 30500001 | 30600000 | 1070 | 935  | 30550000 | 0.122201 | 0.041750989 |
| chr3 | 30550001 | 30650000 | 1063 | 904  | 30600000 | 0.161375 | 0.011237465 |
| chr3 | 30600001 | 30700000 | 1057 | 927  | 30650000 | 0.116962 | 0.048778992 |
| chr3 | 30950001 | 31050000 | 957  | 1032 | 3.10E+07 | -0.18122 | 0.005102224 |
| chr3 | 31250001 | 31350000 | 1029 | 1084 | 31300000 | -0.14749 | 0.018201267 |
| chr3 | 31350001 | 31450000 | 1069 | 934  | 31400000 | 0.122396 | 0.04150632  |
| chr3 | 31450001 | 31550000 | 1112 | 974  | 31500000 | 0.118791 | 0.046224467 |
| chr3 | 31500001 | 31600000 | 1096 | 933  | 31550000 | 0.159927 | 0.011851878 |
| chr3 | 31850001 | 31950000 | 1048 | 889  | 31900000 | 0.165012 | 0.009815562 |
| chr3 | 32550001 | 32650000 | 970  | 830  | 32600000 | 0.152502 | 0.015482847 |
| chr3 | 32600001 | 32700000 | 973  | 823  | 32650000 | 0.169176 | 0.00838326  |
| chr3 | 33150001 | 33250000 | 1040 | 909  | 33200000 | 0.12186  | 0.042182199 |
| chr3 | 33200001 | 33300000 | 1058 | 918  | 33250000 | 0.132402 | 0.030427706 |
| chr3 | 33250001 | 33350000 | 1001 | 824  | 33300000 | 0.208354 | 0.001639058 |
| chr3 | 33300001 | 33400000 | 878  | 757  | 33350000 | 0.141556 | 0.022562412 |
| chr3 | 33350001 | 33450000 | 958  | 827  | 33400000 | 0.139767 | 0.023947777 |
| chr3 | 33400001 | 33500000 | 954  | 793  | 33450000 | 0.194297 | 0.003036023 |
| chr3 | 33450001 | 33550000 | 889  | 754  | 33500000 | 0.165247 | 0.00972917  |
| chr3 | 33500001 | 33600000 | 923  | 804  | 33550000 | 0.126763 | 0.036321712 |
| chr3 | 33700001 | 33800000 | 912  | 773  | 33750000 | 0.166194 | 0.009388642 |
| chr3 | 33750001 | 33850000 | 906  | 783  | 33800000 | 0.138127 | 0.025279544 |
| chr3 | 34050001 | 34150000 | 931  | 805  | 34100000 | 0.137421 | 0.025872195 |
| chr3 | 34900001 | 35000000 | 965  | 840  | 34950000 | 0.127768 | 0.035207894 |
| chr3 | 34950001 | 35050000 | 964  | 845  | 3.50E+07 | 0.11771  | 0.047721359 |
| chr3 | 35050001 | 35150000 | 914  | 773  | 35100000 | 0.169354 | 0.008326245 |
| chr3 | 35100001 | 35200000 | 920  | 803  | 35150000 | 0.123862 | 0.039702286 |
| chr3 | 35200001 | 35300000 | 964  | 809  | 35250000 | 0.180522 | 0.005371594 |
| chr3 | 35250001 | 35350000 | 979  | 798  | 35300000 | 0.222548 | 0.000849327 |
| chr3 | 35300001 | 35400000 | 1069 | 907  | 35350000 | 0.164716 | 0.009925097 |
| chr3 | 35350001 | 35450000 | 1103 | 959  | 35400000 | 0.129458 | 0.033396985 |
| chr3 | 35900001 | 36000000 | 920  | 965  | 35950000 | -0.14127 | 0.022517915 |
| chr3 | 36100001 | 36200000 | 994  | 864  | 36150000 | 0.129843 | 0.032996049 |
| chr3 | 37050001 | 37150000 | 1030 | 868  | 37100000 | 0.174506 | 0.00682049  |

|      |          |          |      |      |          |          |             |
|------|----------|----------|------|------|----------|----------|-------------|
| chr3 | 37150001 | 37250000 | 883  | 921  | 37200000 | -0.13316 | 0.029407215 |
| chr3 | 37250001 | 37350000 | 952  | 829  | 37300000 | 0.127218 | 0.035814392 |
| chr3 | 37300001 | 37400000 | 1009 | 859  | 37350000 | 0.159824 | 0.011896532 |
| chr3 | 37350001 | 37450000 | 966  | 832  | 37400000 | 0.143068 | 0.021445185 |
| chr3 | 37700001 | 37800000 | 1069 | 1129 | 37750000 | -0.15116 | 0.016009035 |
| chr3 | 37750001 | 37850000 | 1034 | 1081 | 37800000 | -0.1365  | 0.026379237 |
| chr3 | 37800001 | 37900000 | 954  | 991  | 37850000 | -0.12727 | 0.035447139 |
| chr3 | 37850001 | 37950000 | 984  | 1030 | 37900000 | -0.13829 | 0.024873224 |
| chr3 | 37900001 | 38000000 | 1005 | 1047 | 37950000 | -0.13144 | 0.031076522 |
| chr3 | 37950001 | 38050000 | 1038 | 1112 | 3.80E+07 | -0.17172 | 0.007451034 |
| chr3 | 38000001 | 38100000 | 1051 | 1154 | 38050000 | -0.20725 | 0.001665181 |
| chr3 | 38050001 | 38150000 | 905  | 937  | 38100000 | -0.1225  | 0.041046266 |
| chr3 | 38600001 | 38700000 | 1123 | 1209 | 38650000 | -0.17883 | 0.005621914 |
| chr3 | 38650001 | 38750000 | 1105 | 1153 | 38700000 | -0.13372 | 0.028882102 |
| chr3 | 39350001 | 39450000 | 757  | 781  | 39400000 | -0.1174  | 0.04781793  |
| chr3 | 39400001 | 39500000 | 845  | 882  | 39450000 | -0.1342  | 0.028435923 |
| chr3 | 39750001 | 39850000 | 998  | 859  | 39800000 | 0.14401  | 0.020773135 |
| chr3 | 39800001 | 39900000 | 1033 | 868  | 39850000 | 0.178702 | 0.005777902 |
| chr3 | 39950001 | 40050000 | 861  | 753  | 4.00E+07 | 0.120992 | 0.043295453 |
| chr3 | 40000001 | 40100000 | 894  | 781  | 40050000 | 0.122581 | 0.041275269 |
| chr3 | 40150001 | 40250000 | 1063 | 906  | 40200000 | 0.158187 | 0.012628729 |
| chr3 | 40200001 | 40300000 | 1100 | 905  | 40250000 | 0.209142 | 0.001581765 |
| chr3 | 40250001 | 40350000 | 972  | 846  | 40300000 | 0.127927 | 0.035034151 |
| chr3 | 40400001 | 40500000 | 1039 | 884  | 40450000 | 0.160706 | 0.011518001 |
| chr3 | 41550001 | 41650000 | 1013 | 884  | 41600000 | 0.124144 | 0.039362787 |
| chr3 | 42250001 | 42350000 | 903  | 959  | 42300000 | -0.15918 | 0.011986426 |
| chr3 | 42350001 | 42450000 | 1008 | 1045 | 42400000 | -0.12438 | 0.03876128  |
| chr3 | 42400001 | 42500000 | 1025 | 1092 | 42450000 | -0.16372 | 0.010122831 |
| chr3 | 42550001 | 42650000 | 1000 | 1033 | 42600000 | -0.11921 | 0.045318312 |
| chr3 | 42650001 | 42750000 | 1133 | 1203 | 42700000 | -0.15886 | 0.012126483 |
| chr3 | 42700001 | 42800000 | 1112 | 1230 | 42750000 | -0.21787 | 0.001018423 |
| chr3 | 42750001 | 42850000 | 906  | 953  | 42800000 | -0.14534 | 0.019608662 |
| chr3 | 42850001 | 42950000 | 937  | 983  | 42900000 | -0.14151 | 0.022331291 |
| chr3 | 43000001 | 43100000 | 1057 | 1130 | 43050000 | -0.16872 | 0.008370322 |
| chr3 | 43050001 | 43150000 | 975  | 1097 | 43100000 | -0.24246 | 0.000302004 |
| chr3 | 43100001 | 43200000 | 1010 | 1087 | 43150000 | -0.17837 | 0.005726847 |
| chr3 | 43200001 | 43300000 | 1047 | 1085 | 43250000 | -0.12381 | 0.039448745 |
| chr3 | 43500001 | 43600000 | 1008 | 872  | 43550000 | 0.136724 | 0.026468203 |
| chr3 | 43550001 | 43650000 | 943  | 824  | 43600000 | 0.122242 | 0.041699532 |
| chr3 | 43650001 | 43750000 | 927  | 794  | 43700000 | 0.151059 | 0.01629017  |
| chr3 | 43950001 | 44050000 | 904  | 955  | 4.40E+07 | -0.15155 | 0.015787089 |
| chr3 | 44150001 | 44250000 | 1008 | 1095 | 44200000 | -0.19181 | 0.003283727 |
| chr3 | 44350001 | 44450000 | 952  | 835  | 44400000 | 0.116814 | 0.048991645 |
| chr3 | 45000001 | 45100000 | 1016 | 1049 | 45050000 | -0.11849 | 0.046307384 |
| chr3 | 45300001 | 45400000 | 1105 | 945  | 45350000 | 0.153288 | 0.015057413 |
| chr3 | 45350001 | 45450000 | 1043 | 873  | 45400000 | 0.184314 | 0.004605966 |
| chr3 | 45900001 | 46000000 | 1059 | 1107 | 45950000 | -0.13632 | 0.026533369 |

|      |          |          |      |      |          |          |             |
|------|----------|----------|------|------|----------|----------|-------------|
| chr3 | 46400001 | 46500000 | 970  | 1005 | 46450000 | -0.12351 | 0.039805791 |
| chr3 | 46600001 | 46700000 | 871  | 984  | 46650000 | -0.24836 | 0.000222053 |
| chr3 | 46650001 | 46750000 | 1048 | 1206 | 46700000 | -0.27496 | 5.13E-05    |
| chr3 | 46700001 | 46800000 | 1077 | 1197 | 46750000 | -0.22478 | 0.000731884 |
| chr3 | 46850001 | 46950000 | 1093 | 1183 | 46900000 | -0.18653 | 0.004101214 |
| chr3 | 46900001 | 47000000 | 1156 | 1258 | 46950000 | -0.19436 | 0.002943437 |
| chr3 | 46950001 | 47050000 | 1117 | 1202 | 4.70E+07 | -0.17818 | 0.005770481 |
| chr3 | 47000001 | 47100000 | 1005 | 1052 | 47050000 | -0.13831 | 0.02485257  |
| chr3 | 47100001 | 47200000 | 955  | 818  | 47150000 | 0.151028 | 0.016307582 |
| chr3 | 47150001 | 47250000 | 871  | 764  | 47200000 | 0.116728 | 0.049113912 |
| chr3 | 47500001 | 47600000 | 766  | 802  | 47550000 | -0.13863 | 0.024591485 |
| chr3 | 47650001 | 47750000 | 969  | 846  | 47700000 | 0.123467 | 0.040181637 |
| chr3 | 48250001 | 48350000 | 913  | 797  | 48300000 | 0.123663 | 0.039942955 |
| chr3 | 48450001 | 48550000 | 902  | 962  | 48500000 | -0.16528 | 0.009544065 |
| chr3 | 48500001 | 48600000 | 894  | 930  | 48550000 | -0.12933 | 0.033228675 |
| chr3 | 48550001 | 48650000 | 1105 | 1169 | 48600000 | -0.1536  | 0.014675082 |
| chr3 | 48600001 | 48700000 | 1172 | 1287 | 48650000 | -0.20741 | 0.001653221 |
| chr3 | 48650001 | 48750000 | 970  | 1060 | 48700000 | -0.20038 | 0.002264516 |
| chr3 | 49000001 | 49100000 | 894  | 960  | 49050000 | -0.17513 | 0.006516461 |
| chr3 | 49050001 | 49150000 | 869  | 934  | 49100000 | -0.17644 | 0.006186761 |
| chr3 | 49100001 | 49200000 | 885  | 962  | 49150000 | -0.19273 | 0.003156756 |
| chr3 | 49150001 | 49250000 | 883  | 919  | 49200000 | -0.13002 | 0.032506056 |
| chr3 | 49650001 | 49750000 | 1024 | 1064 | 49700000 | -0.12765 | 0.035021734 |
| chr3 | 49700001 | 49800000 | 874  | 963  | 49750000 | -0.21227 | 0.001323082 |
| chr3 | 49950001 | 50050000 | 768  | 832  | 5.00E+07 | -0.18785 | 0.003881164 |
| chr3 | 50000001 | 50100000 | 836  | 869  | 50050000 | -0.12823 | 0.034401396 |
| chr3 | 50150001 | 50250000 | 1049 | 1153 | 50200000 | -0.20875 | 0.001555568 |
| chr3 | 50200001 | 50300000 | 1066 | 1219 | 50250000 | -0.26586 | 8.59E-05    |
| chr3 | 50250001 | 50350000 | 961  | 1190 | 50300000 | -0.38073 | 4.48E-08    |
| chr3 | 50300001 | 50400000 | 906  | 1105 | 50350000 | -0.35884 | 2.25E-07    |
| chr3 | 50350001 | 50450000 | 1136 | 1211 | 50400000 | -0.16461 | 0.009790173 |
| chr3 | 50400001 | 50500000 | 1204 | 1259 | 50450000 | -0.13681 | 0.026109965 |
| chr3 | 50450001 | 50550000 | 1150 | 1234 | 50500000 | -0.17408 | 0.006792843 |
| chr3 | 50500001 | 50600000 | 1144 | 1209 | 50550000 | -0.1521  | 0.015482366 |
| chr3 | 50650001 | 50750000 | 1018 | 1051 | 50700000 | -0.1184  | 0.046430055 |
| chr3 | 51200001 | 51300000 | 822  | 711  | 51250000 | 0.136917 | 0.026301773 |
| chr3 | 51650001 | 51750000 | 983  | 1067 | 51700000 | -0.19067 | 0.003446439 |
| chr3 | 51700001 | 51800000 | 984  | 1080 | 51750000 | -0.20667 | 0.001709463 |
| chr3 | 51950001 | 52050000 | 1056 | 1141 | 5.20E+07 | -0.18406 | 0.004542627 |
| chr3 | 52000001 | 52100000 | 1037 | 1232 | 52050000 | -0.32096 | 3.04E-06    |
| chr3 | 52050001 | 52150000 | 1107 | 1196 | 52100000 | -0.18393 | 0.004566414 |
| chr3 | 52250001 | 52350000 | 992  | 1108 | 52300000 | -0.23192 | 0.000515381 |
| chr3 | 52300001 | 52400000 | 1073 | 1190 | 52350000 | -0.22168 | 0.000849563 |
| chr3 | 52350001 | 52450000 | 1129 | 1244 | 52400000 | -0.21231 | 0.00132073  |
| chr3 | 52400001 | 52500000 | 1092 | 1212 | 52450000 | -0.22279 | 0.000805644 |
| chr3 | 52450001 | 52550000 | 1054 | 1194 | 52500000 | -0.2523  | 0.000180159 |
| chr3 | 52500001 | 52600000 | 1029 | 1151 | 52550000 | -0.23402 | 0.000464094 |

|      |          |          |      |      |          |          |             |
|------|----------|----------|------|------|----------|----------|-------------|
| chr3 | 52650001 | 52750000 | 826  | 867  | 52700000 | -0.14226 | 0.021774846 |
| chr3 | 52700001 | 52800000 | 836  | 876  | 52750000 | -0.1398  | 0.023652464 |
| chr3 | 52750001 | 52850000 | 937  | 1031 | 52800000 | -0.2103  | 0.001449375 |
| chr3 | 52800001 | 52900000 | 1097 | 1161 | 52850000 | -0.15418 | 0.014375204 |
| chr3 | 53150001 | 53250000 | 1010 | 1079 | 53200000 | -0.16771 | 0.008700483 |
| chr3 | 53200001 | 53300000 | 1001 | 1076 | 53250000 | -0.17661 | 0.006145044 |
| chr3 | 54250001 | 54350000 | 956  | 1016 | 54300000 | -0.16019 | 0.011546925 |
| chr3 | 54300001 | 54400000 | 949  | 984  | 54350000 | -0.12462 | 0.038473147 |
| chr3 | 54600001 | 54700000 | 977  | 1027 | 54650000 | -0.14438 | 0.020263966 |
| chr3 | 54850001 | 54950000 | 1053 | 1090 | 54900000 | -0.12219 | 0.041432364 |
| chr3 | 54900001 | 55000000 | 1037 | 1135 | 54950000 | -0.20265 | 0.002047892 |
| chr3 | 55300001 | 55400000 | 1127 | 976  | 55350000 | 0.135163 | 0.027845437 |
| chr3 | 55350001 | 55450000 | 1017 | 892  | 55400000 | 0.116832 | 0.048964889 |
| chr3 | 55600001 | 55700000 | 1023 | 1055 | 55650000 | -0.11681 | 0.048659184 |
| chr3 | 55950001 | 56050000 | 1145 | 997  | 5.60E+07 | 0.12731  | 0.03571158  |
| chr3 | 56150001 | 56250000 | 945  | 1011 | 56200000 | -0.16977 | 0.008038319 |
| chr3 | 56250001 | 56350000 | 1064 | 870  | 56300000 | 0.218039 | 0.001050588 |
| chr3 | 56650001 | 56750000 | 860  | 754  | 56700000 | 0.1174   | 0.048157148 |
| chr3 | 56700001 | 56800000 | 918  | 763  | 56750000 | 0.194439 | 0.003017608 |
| chr3 | 56750001 | 56850000 | 1033 | 903  | 56800000 | 0.121671 | 0.04242257  |
| chr3 | 57400001 | 57500000 | 838  | 735  | 57450000 | 0.116834 | 0.048962126 |
| chr3 | 57800001 | 57900000 | 944  | 768  | 57850000 | 0.225309 | 0.000744349 |
| chr3 | 57850001 | 57950000 | 963  | 772  | 57900000 | 0.246563 | 0.000257824 |
| chr3 | 58000001 | 58100000 | 926  | 964  | 58050000 | -0.13039 | 0.032127456 |
| chr3 | 58050001 | 58150000 | 1009 | 1074 | 58100000 | -0.16244 | 0.010620695 |
| chr3 | 58550001 | 58650000 | 1060 | 1114 | 58600000 | -0.14406 | 0.020487146 |
| chr3 | 58600001 | 58700000 | 1001 | 1049 | 58650000 | -0.13994 | 0.023538406 |
| chr3 | 59050001 | 59150000 | 1039 | 898  | 59100000 | 0.138037 | 0.025354781 |
| chr3 | 60150001 | 60250000 | 971  | 1001 | 60200000 | -0.11627 | 0.049433546 |
| chr3 | 60350001 | 60450000 | 1091 | 932  | 60400000 | 0.154877 | 0.014228746 |
| chr3 | 61150001 | 61250000 | 798  | 853  | 61200000 | -0.16853 | 0.008431839 |
| chr3 | 61900001 | 62000000 | 1023 | 1055 | 61950000 | -0.11681 | 0.048659184 |
| chr3 | 62550001 | 62650000 | 1029 | 1065 | 62600000 | -0.12198 | 0.041699661 |
| chr3 | 63350001 | 63450000 | 1089 | 933  | 63400000 | 0.150683 | 0.016506002 |
| chr3 | 63700001 | 63800000 | 892  | 954  | 63750000 | -0.16932 | 0.008179624 |
| chr3 | 63750001 | 63850000 | 939  | 999  | 63800000 | -0.16173 | 0.010905024 |
| chr3 | 63800001 | 63900000 | 995  | 1029 | 63850000 | -0.12085 | 0.043154036 |
| chr3 | 64250001 | 64350000 | 972  | 1032 | 64300000 | -0.15879 | 0.012159495 |
| chr3 | 64300001 | 64400000 | 1021 | 1070 | 64350000 | -0.14    | 0.02349502  |
| chr3 | 64650001 | 64750000 | 997  | 1062 | 64700000 | -0.16349 | 0.010210906 |
| chr3 | 65600001 | 65700000 | 1042 | 894  | 65650000 | 0.148637 | 0.017726384 |
| chr3 | 65900001 | 66000000 | 994  | 866  | 65950000 | 0.126507 | 0.036610526 |
| chr3 | 66300001 | 66400000 | 918  | 947  | 66350000 | -0.11724 | 0.048042537 |
| chr3 | 66350001 | 66450000 | 1028 | 1078 | 66400000 | -0.14089 | 0.02280586  |
| chr3 | 67450001 | 67550000 | 941  | 776  | 67500000 | 0.205766 | 0.00184077  |
| chr3 | 67550001 | 67650000 | 948  | 983  | 67600000 | -0.12468 | 0.038409184 |
| chr3 | 67700001 | 67800000 | 1069 | 937  | 67750000 | 0.117769 | 0.047638557 |

|      |          |          |      |      |          |          |             |
|------|----------|----------|------|------|----------|----------|-------------|
| chr3 | 69000001 | 69100000 | 853  | 891  | 69050000 | -0.13525 | 0.027480089 |
| chr3 | 69100001 | 69200000 | 1036 | 868  | 69150000 | 0.182885 | 0.004882095 |
| chr3 | 69150001 | 69250000 | 1012 | 880  | 69200000 | 0.129262 | 0.033603145 |
| chr3 | 69500001 | 69600000 | 926  | 983  | 69550000 | -0.15855 | 0.012265042 |
| chr3 | 69800001 | 69900000 | 970  | 1068 | 69850000 | -0.21123 | 0.001388613 |
| chr3 | 69850001 | 69950000 | 998  | 1031 | 69900000 | -0.1193  | 0.045193714 |
| chr3 | 70200001 | 70300000 | 1089 | 946  | 70250000 | 0.13072  | 0.03209604  |
| chr3 | 70500001 | 70600000 | 1046 | 899  | 70550000 | 0.146118 | 0.019333757 |
| chr3 | 70800001 | 70900000 | 947  | 977  | 70850000 | -0.11737 | 0.047867464 |
| chr3 | 71150001 | 71250000 | 975  | 1005 | 71200000 | -0.11609 | 0.04969099  |
| chr3 | 72300001 | 72400000 | 1126 | 1162 | 72350000 | -0.11778 | 0.047292863 |
| chr3 | 72800001 | 72900000 | 1036 | 884  | 72850000 | 0.156534 | 0.013407205 |
| chr3 | 72850001 | 72950000 | 957  | 837  | 72900000 | 0.12092  | 0.043388953 |
| chr3 | 73150001 | 73250000 | 874  | 766  | 73200000 | 0.117917 | 0.047431709 |
| chr3 | 73400001 | 73500000 | 1007 | 1042 | 73450000 | -0.12166 | 0.042103839 |
| chr3 | 73600001 | 73700000 | 1027 | 1144 | 73650000 | -0.22802 | 0.000624737 |
| chr3 | 73650001 | 73750000 | 1032 | 1132 | 73700000 | -0.2058  | 0.001777976 |
| chr3 | 74150001 | 74250000 | 968  | 848  | 74200000 | 0.118571 | 0.046526365 |
| chr3 | 74200001 | 74300000 | 960  | 820  | 74250000 | 0.155039 | 0.014146904 |
| chr3 | 74500001 | 74600000 | 1027 | 888  | 74550000 | 0.137433 | 0.025861848 |
| chr3 | 74700001 | 74800000 | 1032 | 882  | 74750000 | 0.154221 | 0.014566357 |
| chr3 | 74750001 | 74850000 | 1036 | 860  | 74800000 | 0.196244 | 0.002793311 |
| chr3 | 74800001 | 74900000 | 983  | 828  | 74850000 | 0.175189 | 0.0066401   |
| chr3 | 74900001 | 75000000 | 961  | 837  | 74950000 | 0.126937 | 0.036127101 |
| chr3 | 74950001 | 75050000 | 969  | 812  | 7.50E+07 | 0.182645 | 0.004929935 |
| chr3 | 75000001 | 75100000 | 1006 | 852  | 75050000 | 0.167333 | 0.008992577 |
| chr3 | 75050001 | 75150000 | 1019 | 831  | 75100000 | 0.221862 | 0.000877473 |
| chr3 | 75300001 | 75400000 | 472  | 497  | 75350000 | -0.14683 | 0.018624313 |
| chr3 | 75450001 | 75550000 | 195  | 208  | 75500000 | -0.16548 | 0.009472046 |
| chr3 | 75900001 | 76000000 | 604  | 510  | 75950000 | 0.17168  | 0.007613592 |
| chr3 | 76000001 | 76100000 | 949  | 815  | 76050000 | 0.147236 | 0.018605424 |
| chr3 | 76050001 | 76150000 | 1016 | 874  | 76100000 | 0.144823 | 0.020207236 |
| chr3 | 76750001 | 76850000 | 969  | 827  | 76800000 | 0.156238 | 0.013551109 |
| chr3 | 76900001 | 77000000 | 1057 | 899  | 76950000 | 0.161211 | 0.011305859 |
| chr3 | 76950001 | 77050000 | 1030 | 816  | 7.70E+07 | 0.263632 | 0.000103978 |
| chr3 | 77100001 | 77200000 | 1030 | 855  | 77150000 | 0.196276 | 0.002789405 |
| chr3 | 77200001 | 77300000 | 929  | 970  | 77250000 | -0.13468 | 0.02799763  |
| chr3 | 77250001 | 77350000 | 803  | 867  | 77300000 | -0.183   | 0.00474436  |
| chr3 | 77350001 | 77450000 | 1040 | 904  | 77400000 | 0.129817 | 0.033022714 |
| chr3 | 77400001 | 77500000 | 1015 | 881  | 77450000 | 0.131894 | 0.030923661 |
| chr3 | 77900001 | 78000000 | 1068 | 918  | 77950000 | 0.145974 | 0.019429456 |
| chr3 | 78250001 | 78350000 | 1041 | 900  | 78300000 | 0.137601 | 0.025719419 |
| chr3 | 78650001 | 78750000 | 1013 | 854  | 78700000 | 0.173954 | 0.006969164 |
| chr3 | 78700001 | 78800000 | 956  | 773  | 78750000 | 0.23417  | 0.000482996 |
| chr3 | 78750001 | 78850000 | 957  | 824  | 78800000 | 0.143503 | 0.021132645 |
| chr3 | 78900001 | 79000000 | 971  | 810  | 78950000 | 0.189178 | 0.003767651 |
| chr3 | 78950001 | 79050000 | 1004 | 782  | 7.90E+07 | 0.288147 | 2.58E-05    |

|      |          |          |      |     |          |          |             |
|------|----------|----------|------|-----|----------|----------|-------------|
| chr3 | 79000001 | 79100000 | 1054 | 882 | 79050000 | 0.184653 | 0.004542582 |
| chr3 | 79450001 | 79550000 | 1039 | 902 | 79500000 | 0.131625 | 0.031189596 |
| chr3 | 80050001 | 80150000 | 1001 | 869 | 80100000 | 0.131642 | 0.031172194 |
| chr3 | 80350001 | 80450000 | 1075 | 922 | 80400000 | 0.149126 | 0.017427673 |
| chr3 | 80400001 | 80500000 | 1026 | 844 | 80450000 | 0.209344 | 0.001567378 |
| chr3 | 80450001 | 80550000 | 967  | 823 | 80500000 | 0.160252 | 0.011711648 |
| chr3 | 80550001 | 80650000 | 982  | 853 | 80600000 | 0.130806 | 0.032009511 |
| chr3 | 80600001 | 80700000 | 945  | 790 | 80650000 | 0.18609  | 0.004282211 |
| chr3 | 80650001 | 80750000 | 961  | 774 | 80700000 | 0.239831 | 0.000363793 |
| chr3 | 80800001 | 80900000 | 1005 | 873 | 80850000 | 0.13077  | 0.032045288 |
| chr3 | 81050001 | 81150000 | 914  | 802 | 81100000 | 0.11622  | 0.049847406 |
| chr3 | 81200001 | 81300000 | 1072 | 926 | 81250000 | 0.138849 | 0.024685556 |
| chr3 | 81250001 | 81350000 | 1050 | 920 | 81300000 | 0.118312 | 0.046883588 |
| chr3 | 81600001 | 81700000 | 1034 | 837 | 81650000 | 0.232565 | 0.000522895 |
| chr3 | 81650001 | 81750000 | 1073 | 844 | 81700000 | 0.273963 | 5.86E-05    |
| chr3 | 82050001 | 82150000 | 1103 | 966 | 82100000 | 0.118966 | 0.045986368 |
| chr3 | 82300001 | 82400000 | 881  | 758 | 82350000 | 0.144572 | 0.02038045  |
| chr3 | 82350001 | 82450000 | 866  | 754 | 82400000 | 0.127431 | 0.035578529 |
| chr3 | 82400001 | 82500000 | 935  | 784 | 82450000 | 0.181741 | 0.005113872 |
| chr3 | 82450001 | 82550000 | 1001 | 842 | 82500000 | 0.177178 | 0.00613879  |
| chr3 | 82500001 | 82600000 | 1046 | 909 | 82550000 | 0.130159 | 0.032669387 |
| chr3 | 82550001 | 82650000 | 1068 | 861 | 82600000 | 0.238455 | 0.000389947 |
| chr3 | 82600001 | 82700000 | 1024 | 865 | 82650000 | 0.171072 | 0.007794394 |
| chr3 | 82900001 | 83000000 | 959  | 830 | 82950000 | 0.136048 | 0.0270575   |
| chr3 | 82950001 | 83050000 | 951  | 793 | 8.30E+07 | 0.189753 | 0.003678204 |
| chr3 | 83000001 | 83100000 | 994  | 868 | 83050000 | 0.123179 | 0.040534457 |
| chr3 | 83050001 | 83150000 | 1041 | 891 | 83100000 | 0.152101 | 0.015703473 |
| chr3 | 83100001 | 83200000 | 982  | 860 | 83150000 | 0.119015 | 0.045920172 |
| chr3 | 83200001 | 83300000 | 991  | 869 | 83250000 | 0.117157 | 0.048501713 |
| chr3 | 83300001 | 83400000 | 968  | 813 | 83350000 | 0.17938  | 0.005623372 |
| chr3 | 83350001 | 83450000 | 1021 | 825 | 83400000 | 0.235145 | 0.000460174 |
| chr3 | 83400001 | 83500000 | 1042 | 889 | 83450000 | 0.156728 | 0.013313625 |
| chr3 | 83450001 | 83550000 | 976  | 832 | 83500000 | 0.157926 | 0.01274899  |
| chr3 | 83500001 | 83600000 | 960  | 825 | 83550000 | 0.146269 | 0.019234364 |
| chr3 | 83750001 | 83850000 | 982  | 840 | 83800000 | 0.152962 | 0.0152327   |
| chr3 | 83800001 | 83900000 | 979  | 846 | 83850000 | 0.138279 | 0.025153141 |
| chr3 | 83900001 | 84000000 | 1015 | 889 | 83950000 | 0.118853 | 0.046140764 |
| chr3 | 83950001 | 84050000 | 1040 | 857 | 8.40E+07 | 0.206845 | 0.001754106 |
| chr3 | 84000001 | 84100000 | 998  | 836 | 84050000 | 0.183165 | 0.00482687  |
| chr3 | 84050001 | 84150000 | 958  | 803 | 84100000 | 0.182254 | 0.005008788 |
| chr3 | 84100001 | 84200000 | 995  | 839 | 84150000 | 0.173654 | 0.007051418 |
| chr3 | 84250001 | 84350000 | 968  | 820 | 84300000 | 0.167011 | 0.009102917 |
| chr3 | 84300001 | 84400000 | 1040 | 849 | 84350000 | 0.220375 | 0.000941401 |
| chr3 | 84350001 | 84450000 | 999  | 831 | 84400000 | 0.193264 | 0.003172283 |
| chr3 | 84400001 | 84500000 | 950  | 811 | 84450000 | 0.155854 | 0.013739408 |
| chr3 | 84450001 | 84550000 | 948  | 823 | 84500000 | 0.131623 | 0.031191267 |
| chr3 | 84500001 | 84600000 | 1012 | 866 | 84550000 | 0.152399 | 0.015539333 |

|      |          |          |      |     |          |          |             |
|------|----------|----------|------|-----|----------|----------|-------------|
| chr3 | 84550001 | 84650000 | 1021 | 845 | 84600000 | 0.200588 | 0.002313909 |
| chr3 | 84600001 | 84700000 | 1000 | 845 | 84650000 | 0.170605 | 0.007935896 |
| chr3 | 84650001 | 84750000 | 1009 | 882 | 84700000 | 0.121704 | 0.042380192 |
| chr3 | 85250001 | 85350000 | 952  | 800 | 85300000 | 0.17859  | 0.005803713 |
| chr3 | 85300001 | 85400000 | 1034 | 793 | 85350000 | 0.310472 | 6.66E-06    |
| chr3 | 85350001 | 85450000 | 981  | 749 | 85400000 | 0.316916 | 4.43E-06    |
| chr3 | 85400001 | 85500000 | 916  | 793 | 85450000 | 0.135655 | 0.02740483  |
| chr3 | 85450001 | 85550000 | 984  | 816 | 85500000 | 0.197717 | 0.002621434 |
| chr3 | 85500001 | 85600000 | 1022 | 829 | 85550000 | 0.229579 | 0.000605336 |
| chr3 | 85550001 | 85650000 | 1032 | 904 | 85600000 | 0.118677 | 0.046381595 |
| chr3 | 85650001 | 85750000 | 1048 | 877 | 85700000 | 0.184618 | 0.004548972 |
| chr3 | 85700001 | 85800000 | 1033 | 872 | 85750000 | 0.172068 | 0.007499823 |
| chr3 | 86850001 | 86950000 | 924  | 799 | 86900000 | 0.137326 | 0.025952816 |
| chr3 | 86900001 | 87000000 | 1007 | 866 | 86950000 | 0.145253 | 0.019913777 |
| chr3 | 87300001 | 87400000 | 1014 | 873 | 87350000 | 0.143632 | 0.021040332 |
| chr3 | 87350001 | 87450000 | 1009 | 858 | 87400000 | 0.161505 | 0.011183815 |
| chr3 | 87500001 | 87600000 | 1033 | 812 | 87550000 | 0.274917 | 5.55E-05    |
| chr3 | 87550001 | 87650000 | 991  | 840 | 87600000 | 0.166124 | 0.009413349 |
| chr3 | 87800001 | 87900000 | 980  | 852 | 87850000 | 0.129557 | 0.033294148 |
| chr3 | 87850001 | 87950000 | 909  | 777 | 87900000 | 0.153994 | 0.014684484 |
| chr3 | 88100001 | 88200000 | 1000 | 855 | 88150000 | 0.153632 | 0.014874824 |
| chr3 | 88150001 | 88250000 | 966  | 804 | 88200000 | 0.192456 | 0.003282846 |
| chr3 | 88200001 | 88300000 | 928  | 806 | 88250000 | 0.130973 | 0.031840208 |
| chr3 | 88250001 | 88350000 | 1005 | 868 | 88300000 | 0.139057 | 0.024516852 |
| chr3 | 88400001 | 88500000 | 1021 | 894 | 88450000 | 0.119264 | 0.045581659 |
| chr3 | 88450001 | 88550000 | 995  | 786 | 88500000 | 0.267795 | 8.27E-05    |
| chr3 | 88500001 | 88600000 | 933  | 736 | 88550000 | 0.2698   | 7.40E-05    |
| chr3 | 88550001 | 88650000 | 891  | 710 | 88600000 | 0.255235 | 0.000163566 |
| chr3 | 88600001 | 88700000 | 898  | 752 | 88650000 | 0.183611 | 0.004740018 |
| chr3 | 88650001 | 88750000 | 976  | 843 | 88700000 | 0.138977 | 0.024581732 |
| chr3 | 88700001 | 88800000 | 1012 | 876 | 88750000 | 0.135835 | 0.027245376 |
| chr3 | 89000001 | 89100000 | 1023 | 879 | 89050000 | 0.146499 | 0.01908275  |
| chr3 | 89050001 | 89150000 | 965  | 799 | 89100000 | 0.199962 | 0.002378053 |
| chr3 | 89100001 | 89200000 | 1017 | 849 | 89150000 | 0.188111 | 0.003938672 |
| chr3 | 89200001 | 89300000 | 1075 | 912 | 89250000 | 0.164859 | 0.009871849 |
| chr3 | 89250001 | 89350000 | 1064 | 832 | 89300000 | 0.282471 | 3.60E-05    |
| chr3 | 89300001 | 89400000 | 1016 | 853 | 89350000 | 0.179911 | 0.005504983 |
| chr3 | 89500001 | 89600000 | 969  | 835 | 89550000 | 0.142349 | 0.021970601 |
| chr3 | 89550001 | 89650000 | 1059 | 898 | 89600000 | 0.165543 | 0.009621408 |
| chr3 | 89600001 | 89700000 | 1069 | 869 | 89650000 | 0.226462 | 0.000704156 |
| chr3 | 89650001 | 89750000 | 1075 | 890 | 89700000 | 0.200088 | 0.00236502  |
| chr3 | 89800001 | 89900000 | 990  | 835 | 89850000 | 0.173281 | 0.007154825 |
| chr3 | 89850001 | 89950000 | 856  | 704 | 89900000 | 0.209664 | 0.001544864 |
| chr3 | 90200001 | 90300000 | 456  | 383 | 90250000 | 0.179318 | 0.0056374   |
| chr3 | 90300001 | 90400000 | 642  | 561 | 90350000 | 0.122201 | 0.041750989 |
| chr3 | 90350001 | 90450000 | 638  | 540 | 90400000 | 0.168225 | 0.008692862 |
| chr3 | 90500001 | 90600000 | 48   | 42  | 90550000 | 0.120273 | 0.044234652 |

|      |          |          |      |     |           |          |             |
|------|----------|----------|------|-----|-----------|----------|-------------|
| chr3 | 93450001 | 93550000 | 186  | 213 | 93500000  | -0.26792 | 7.66E-05    |
| chr3 | 93500001 | 93600000 | 445  | 477 | 93550000  | -0.17256 | 0.007212201 |
| chr3 | 94050001 | 94150000 | 1016 | 885 | 94100000  | 0.126779 | 0.036303864 |
| chr3 | 94100001 | 94200000 | 1047 | 909 | 94150000  | 0.131537 | 0.031275926 |
| chr3 | 94150001 | 94250000 | 1024 | 881 | 94200000  | 0.14463  | 0.020340582 |
| chr3 | 94500001 | 94600000 | 940  | 794 | 94550000  | 0.17115  | 0.007770953 |
| chr3 | 94650001 | 94750000 | 955  | 827 | 94700000  | 0.135242 | 0.027774384 |
| chr3 | 94700001 | 94800000 | 922  | 793 | 94750000  | 0.145074 | 0.020035536 |
| chr3 | 94750001 | 94850000 | 959  | 836 | 94800000  | 0.125656 | 0.037582904 |
| chr3 | 94850001 | 94950000 | 920  | 784 | 94900000  | 0.158408 | 0.012527421 |
| chr3 | 94900001 | 95000000 | 922  | 807 | 94950000  | 0.119826 | 0.044827398 |
| chr3 | 95050001 | 95150000 | 1054 | 890 | 95100000  | 0.171626 | 0.007629413 |
| chr3 | 95200001 | 95300000 | 1040 | 883 | 95250000  | 0.163726 | 0.010298971 |
| chr3 | 95250001 | 95350000 | 971  | 846 | 95300000  | 0.126442 | 0.036684285 |
| chr3 | 95350001 | 95450000 | 915  | 793 | 95400000  | 0.134079 | 0.028836197 |
| chr3 | 95400001 | 95500000 | 943  | 821 | 95450000  | 0.127504 | 0.035497946 |
| chr3 | 95500001 | 95600000 | 935  | 810 | 95550000  | 0.134673 | 0.028289884 |
| chr3 | 95550001 | 95650000 | 940  | 819 | 95600000  | 0.126426 | 0.036702776 |
| chr3 | 95650001 | 95750000 | 959  | 821 | 95700000  | 0.151777 | 0.015883928 |
| chr3 | 95700001 | 95800000 | 1030 | 818 | 95750000  | 0.2601   | 0.00012599  |
| chr3 | 95750001 | 95850000 | 989  | 823 | 95800000  | 0.192706 | 0.003248237 |
| chr3 | 95800001 | 95900000 | 933  | 813 | 95850000  | 0.12625  | 0.036902108 |
| chr3 | 95850001 | 95950000 | 966  | 842 | 95900000  | 0.125831 | 0.037381128 |
| chr3 | 95900001 | 96000000 | 1040 | 859 | 95950000  | 0.203482 | 0.002037413 |
| chr3 | 95950001 | 96050000 | 1019 | 849 | 9.60E+07  | 0.190946 | 0.003498701 |
| chr3 | 96150001 | 96250000 | 993  | 858 | 96200000  | 0.138444 | 0.025017039 |
| chr3 | 96550001 | 96650000 | 1050 | 867 | 96600000  | 0.203914 | 0.001998828 |
| chr3 | 96600001 | 96700000 | 940  | 784 | 96650000  | 0.189435 | 0.003727328 |
| chr3 | 96750001 | 96850000 | 1066 | 923 | 96800000  | 0.135433 | 0.027602667 |
| chr3 | 96800001 | 96900000 | 1109 | 948 | 96850000  | 0.153929 | 0.014718657 |
| chr3 | 96850001 | 96950000 | 1080 | 936 | 96900000  | 0.134079 | 0.028836197 |
| chr3 | 96900001 | 97000000 | 991  | 843 | 96950000  | 0.160981 | 0.011402027 |
| chr3 | 97100001 | 97200000 | 1077 | 897 | 97150000  | 0.191467 | 0.003422858 |
| chr3 | 97150001 | 97250000 | 1022 | 862 | 97200000  | 0.173264 | 0.007159538 |
| chr3 | 97250001 | 97350000 | 1016 | 852 | 97300000  | 0.181603 | 0.005142403 |
| chr3 | 97300001 | 97400000 | 1013 | 845 | 97350000  | 0.189239 | 0.003757987 |
| chr3 | 97350001 | 97450000 | 1010 | 861 | 97400000  | 0.157898 | 0.012761703 |
| chr3 | 97450001 | 97550000 | 1041 | 905 | 97500000  | 0.129609 | 0.03323977  |
| chr3 | 98200001 | 98300000 | 1099 | 936 | 98250000  | 0.159239 | 0.012153837 |
| chr3 | 98350001 | 98450000 | 839  | 731 | 98400000  | 0.126428 | 0.036700398 |
| chr3 | 98950001 | 99050000 | 905  | 790 | 9.90E+07  | 0.123693 | 0.039906546 |
| chr3 | 99300001 | 99400000 | 959  | 839 | 99350000  | 0.120488 | 0.043951914 |
| chr3 | 99650001 | 99750000 | 1085 | 933 | 99700000  | 0.145374 | 0.019831562 |
| chr3 | 99700001 | 99800000 | 1018 | 865 | 99750000  | 0.162594 | 0.010742144 |
| chr3 | 1E+08    | 1E+08    | 946  | 813 | 100400000 | 0.146213 | 0.019270948 |
| chr3 | 1.01E+08 | 1.01E+08 | 1084 | 928 | 100550000 | 0.151796 | 0.015873048 |
| chr3 | 1.01E+08 | 1.01E+08 | 719  | 758 | 101200000 | -0.14858 | 0.017526872 |



|      |          |          |      |     |           |          |             |
|------|----------|----------|------|-----|-----------|----------|-------------|
| chr3 | 1.01E+08 | 1.01E+08 | 818  | 867 | 101250000 | -0.1563  | 0.013313161 |
| chr3 | 1.01E+08 | 1.01E+08 | 747  | 771 | 101300000 | -0.11799 | 0.046987031 |
| chr3 | 1.02E+08 | 1.02E+08 | 1089 | 916 | 102100000 | 0.177213 | 0.006130373 |
| chr3 | 1.02E+08 | 1.02E+08 | 1071 | 939 | 102150000 | 0.11739  | 0.04817229  |
| chr3 | 1.03E+08 | 1.03E+08 | 954  | 821 | 102550000 | 0.144235 | 0.020615041 |
| chr3 | 1.03E+08 | 1.03E+08 | 995  | 870 | 102850000 | 0.121309 | 0.042885167 |
| chr3 | 1.03E+08 | 1.03E+08 | 1024 | 878 | 103100000 | 0.149551 | 0.017171892 |
| chr3 | 1.03E+08 | 1.03E+08 | 1028 | 825 | 103150000 | 0.245002 | 0.000279443 |
| chr3 | 1.03E+08 | 1.03E+08 | 1013 | 759 | 103200000 | 0.344091 | 7.37E-07    |
| chr3 | 1.03E+08 | 1.03E+08 | 926  | 752 | 103250000 | 0.227908 | 0.000656604 |
| chr3 | 1.03E+08 | 1.03E+08 | 953  | 791 | 103300000 | 0.196427 | 0.002771418 |
| chr3 | 1.03E+08 | 1.03E+08 | 1005 | 869 | 103350000 | 0.137396 | 0.025893353 |
| chr3 | 1.03E+08 | 1.04E+08 | 1020 | 881 | 103450000 | 0.138983 | 0.024576286 |
| chr3 | 1.03E+08 | 1.04E+08 | 1089 | 953 | 103500000 | 0.120084 | 0.04448482  |
| chr3 | 1.04E+08 | 1.04E+08 | 1075 | 943 | 103600000 | 0.116635 | 0.049247642 |
| chr3 | 1.04E+08 | 1.04E+08 | 1074 | 912 | 103650000 | 0.163516 | 0.010379878 |
| chr3 | 1.04E+08 | 1.04E+08 | 1042 | 900 | 103700000 | 0.138987 | 0.024573736 |
| chr3 | 1.04E+08 | 1.04E+08 | 1010 | 886 | 103850000 | 0.116605 | 0.049291222 |
| chr3 | 1.04E+08 | 1.04E+08 | 1062 | 819 | 103900000 | 0.302477 | 1.09E-05    |
| chr3 | 1.04E+08 | 1.04E+08 | 1026 | 831 | 103950000 | 0.231739 | 0.000544603 |
| chr3 | 1.04E+08 | 1.04E+08 | 979  | 854 | 1.04E+08  | 0.124701 | 0.038699374 |
| chr3 | 1.04E+08 | 1.04E+08 | 953  | 828 | 104050000 | 0.130474 | 0.032346751 |
| chr3 | 1.04E+08 | 1.05E+08 | 1045 | 911 | 104500000 | 0.125608 | 0.037638251 |
| chr3 | 1.05E+08 | 1.05E+08 | 1068 | 866 | 104550000 | 0.230101 | 0.000590117 |
| chr3 | 1.05E+08 | 1.05E+08 | 1075 | 893 | 104600000 | 0.195233 | 0.002917038 |
| chr3 | 1.05E+08 | 1.05E+08 | 1016 | 867 | 104750000 | 0.156425 | 0.013460081 |
| chr3 | 1.05E+08 | 1.05E+08 | 1038 | 890 | 104800000 | 0.149557 | 0.017168104 |
| chr3 | 1.05E+08 | 1.05E+08 | 1036 | 867 | 104850000 | 0.184548 | 0.004561998 |
| chr3 | 1.05E+08 | 1.05E+08 | 1054 | 844 | 104900000 | 0.248188 | 0.000236984 |
| chr3 | 1.05E+08 | 1.05E+08 | 1038 | 901 | 105400000 | 0.131836 | 0.030981102 |
| chr3 | 1.05E+08 | 1.06E+08 | 1029 | 901 | 105450000 | 0.119272 | 0.045571064 |
| chr3 | 1.06E+08 | 1.06E+08 | 1071 | 918 | 105600000 | 0.150021 | 0.016892961 |
| chr3 | 1.06E+08 | 1.06E+08 | 1053 | 870 | 105650000 | 0.203046 | 0.002076989 |
| chr3 | 1.06E+08 | 1.06E+08 | 1043 | 891 | 105700000 | 0.15487  | 0.014232523 |
| chr3 | 1.06E+08 | 1.06E+08 | 1008 | 881 | 106200000 | 0.12191  | 0.042118294 |
| chr3 | 1.07E+08 | 1.07E+08 | 995  | 838 | 106550000 | 0.175375 | 0.006591827 |
| chr3 | 1.07E+08 | 1.07E+08 | 927  | 803 | 106600000 | 0.134798 | 0.028176043 |
| chr3 | 1.07E+08 | 1.07E+08 | 890  | 928 | 106850000 | -0.13269 | 0.029853633 |
| chr3 | 1.07E+08 | 1.07E+08 | 1070 | 914 | 107250000 | 0.154973 | 0.014180235 |
| chr3 | 1.07E+08 | 1.07E+08 | 1040 | 903 | 107300000 | 0.131414 | 0.031398819 |
| chr3 | 1.08E+08 | 1.08E+08 | 946  | 824 | 1.08E+08  | 0.126824 | 0.036253592 |
| chr3 | 1.09E+08 | 1.09E+08 | 924  | 972 | 108800000 | -0.14544 | 0.019542554 |
| chr3 | 1.09E+08 | 1.09E+08 | 790  | 691 | 109050000 | 0.120795 | 0.043550673 |
| chr3 | 1.09E+08 | 1.09E+08 | 772  | 655 | 109100000 | 0.164734 | 0.009918204 |
| chr3 | 1.09E+08 | 1.1E+08  | 913  | 779 | 109500000 | 0.15662  | 0.013365794 |
| chr3 | 1.1E+08  | 1.1E+08  | 961  | 839 | 109600000 | 0.123494 | 0.040149177 |
| chr3 | 1.1E+08  | 1.1E+08  | 943  | 803 | 109650000 | 0.159486 | 0.012044721 |

|      |          |          |      |      |           |          |             |
|------|----------|----------|------|------|-----------|----------|-------------|
| chr3 | 1.1E+08  | 1.1E+08  | 915  | 759  | 109750000 | 0.1973   | 0.002669104 |
| chr3 | 1.1E+08  | 1.1E+08  | 1019 | 851  | 109800000 | 0.187551 | 0.004031301 |
| chr3 | 1.1E+08  | 1.1E+08  | 1025 | 856  | 109850000 | 0.187569 | 0.004028262 |
| chr3 | 1.1E+08  | 1.1E+08  | 1064 | 880  | 109900000 | 0.201551 | 0.002218316 |
| chr3 | 1.1E+08  | 1.1E+08  | 886  | 765  | 110200000 | 0.139475 | 0.024180031 |
| chr3 | 1.1E+08  | 1.11E+08 | 1020 | 882  | 110450000 | 0.137347 | 0.025934777 |
| chr3 | 1.1E+08  | 1.11E+08 | 1080 | 913  | 110500000 | 0.169973 | 0.008131097 |
| chr3 | 1.11E+08 | 1.11E+08 | 1064 | 867  | 110550000 | 0.223022 | 0.000830375 |
| chr3 | 1.11E+08 | 1.11E+08 | 946  | 830  | 110600000 | 0.116357 | 0.049648913 |
| chr3 | 1.12E+08 | 1.12E+08 | 1099 | 960  | 111700000 | 0.122713 | 0.041109964 |
| chr3 | 1.12E+08 | 1.12E+08 | 1000 | 858  | 112050000 | 0.148579 | 0.017762127 |
| chr3 | 1.12E+08 | 1.12E+08 | 968  | 821  | 112100000 | 0.165253 | 0.009727004 |
| chr3 | 1.13E+08 | 1.13E+08 | 936  | 816  | 112650000 | 0.125568 | 0.037685231 |
| chr3 | 1.13E+08 | 1.13E+08 | 1029 | 878  | 112700000 | 0.156578 | 0.013385758 |
| chr3 | 1.13E+08 | 1.13E+08 | 961  | 824  | 113050000 | 0.14952  | 0.017190312 |
| chr3 | 1.13E+08 | 1.13E+08 | 888  | 774  | 113100000 | 0.125854 | 0.03735451  |
| chr3 | 1.13E+08 | 1.14E+08 | 918  | 802  | 113500000 | 0.12252  | 0.041350593 |
| chr3 | 1.15E+08 | 1.15E+08 | 1067 | 919  | 114650000 | 0.143052 | 0.021456938 |
| chr3 | 1.15E+08 | 1.15E+08 | 1012 | 884  | 115050000 | 0.122719 | 0.041102583 |
| chr3 | 1.15E+08 | 1.15E+08 | 1073 | 911  | 115100000 | 0.163755 | 0.010287863 |
| chr3 | 1.16E+08 | 1.16E+08 | 1015 | 868  | 115900000 | 0.153341 | 0.015029308 |
| chr3 | 1.16E+08 | 1.16E+08 | 1020 | 876  | 115950000 | 0.147195 | 0.018632127 |
| chr3 | 1.17E+08 | 1.17E+08 | 1000 | 871  | 117050000 | 0.126884 | 0.036186887 |
| chr3 | 1.17E+08 | 1.18E+08 | 984  | 839  | 117500000 | 0.157616 | 0.01289316  |
| chr3 | 1.18E+08 | 1.18E+08 | 1036 | 893  | 117550000 | 0.14192  | 0.022288836 |
| chr3 | 1.18E+08 | 1.18E+08 | 1066 | 929  | 117650000 | 0.126085 | 0.037090003 |
| chr3 | 1.18E+08 | 1.18E+08 | 1029 | 879  | 117800000 | 0.154936 | 0.014198922 |
| chr3 | 1.18E+08 | 1.18E+08 | 1028 | 901  | 117850000 | 0.117869 | 0.04749821  |
| chr3 | 1.18E+08 | 1.18E+08 | 982  | 811  | 118050000 | 0.203649 | 0.00202236  |
| chr3 | 1.19E+08 | 1.19E+08 | 959  | 1020 | 119300000 | -0.16134 | 0.011065668 |
| chr3 | 1.19E+08 | 1.19E+08 | 1036 | 1084 | 119350000 | -0.13771 | 0.02534922  |
| chr3 | 1.2E+08  | 1.2E+08  | 1022 | 1086 | 120200000 | -0.16    | 0.011627828 |
| chr3 | 1.2E+08  | 1.2E+08  | 888  | 927  | 120250000 | -0.13438 | 0.028268345 |
| chr3 | 1.21E+08 | 1.21E+08 | 834  | 711  | 120800000 | 0.157826 | 0.012795231 |
| chr3 | 1.21E+08 | 1.21E+08 | 962  | 819  | 1.21E+08  | 0.159802 | 0.011906422 |
| chr3 | 1.21E+08 | 1.21E+08 | 901  | 732  | 121150000 | 0.227312 | 0.000675837 |
| chr3 | 1.21E+08 | 1.21E+08 | 883  | 727  | 121200000 | 0.208086 | 0.001658943 |
| chr3 | 1.21E+08 | 1.22E+08 | 985  | 852  | 121450000 | 0.136899 | 0.026317703 |
| chr3 | 1.21E+08 | 1.22E+08 | 981  | 814  | 121500000 | 0.196853 | 0.002721096 |
| chr3 | 1.22E+08 | 1.22E+08 | 1030 | 903  | 122050000 | 0.117475 | 0.048052286 |
| chr3 | 1.22E+08 | 1.22E+08 | 1091 | 895  | 122100000 | 0.21332  | 0.001307506 |
| chr3 | 1.22E+08 | 1.22E+08 | 1003 | 873  | 122150000 | 0.127896 | 0.035067529 |
| chr3 | 1.22E+08 | 1.23E+08 | 925  | 954  | 122500000 | -0.11691 | 0.048517709 |
| chr3 | 1.23E+08 | 1.23E+08 | 977  | 1014 | 122550000 | -0.126   | 0.036872841 |
| chr3 | 1.23E+08 | 1.23E+08 | 1076 | 1204 | 122700000 | -0.23453 | 0.000452314 |
| chr3 | 1.23E+08 | 1.23E+08 | 1034 | 1202 | 122750000 | -0.28957 | 2.18E-05    |
| chr3 | 1.23E+08 | 1.23E+08 | 1114 | 1166 | 122800000 | -0.13819 | 0.024952031 |

|      |          |          |      |      |           |          |             |
|------|----------|----------|------|------|-----------|----------|-------------|
| chr3 | 1.23E+08 | 1.23E+08 | 1077 | 1114 | 1.23E+08  | -0.1211  | 0.042822169 |
| chr3 | 1.23E+08 | 1.23E+08 | 1098 | 1213 | 123050000 | -0.21607 | 0.001108496 |
| chr3 | 1.23E+08 | 1.23E+08 | 1107 | 1173 | 123100000 | -0.15592 | 0.013499428 |
| chr3 | 1.23E+08 | 1.23E+08 | 1024 | 1084 | 123150000 | -0.15452 | 0.014198307 |
| chr3 | 1.23E+08 | 1.23E+08 | 964  | 1051 | 123200000 | -0.19703 | 0.00262255  |
| chr3 | 1.23E+08 | 1.23E+08 | 985  | 1050 | 123400000 | -0.16457 | 0.009805827 |
| chr3 | 1.23E+08 | 1.24E+08 | 938  | 988  | 123450000 | -0.14729 | 0.018327197 |
| chr3 | 1.24E+08 | 1.24E+08 | 964  | 1006 | 124100000 | -0.1339  | 0.02871534  |
| chr3 | 1.24E+08 | 1.25E+08 | 918  | 1010 | 124500000 | -0.21016 | 0.001458322 |
| chr3 | 1.25E+08 | 1.26E+08 | 200  | 216  | 125450000 | -0.1834  | 0.004667224 |
| chr3 | 1.25E+08 | 1.26E+08 | 147  | 160  | 125500000 | -0.19463 | 0.002910009 |
| chr3 | 1.26E+08 | 1.26E+08 | 147  | 155  | 125550000 | -0.14882 | 0.017376891 |
| chr3 | 1.26E+08 | 1.26E+08 | 135  | 149  | 125600000 | -0.21472 | 0.001180711 |
| chr3 | 1.26E+08 | 1.26E+08 | 229  | 277  | 125650000 | -0.34691 | 5.25E-07    |
| chr3 | 1.26E+08 | 1.26E+08 | 598  | 686  | 125700000 | -0.27043 | 6.65E-05    |
| chr3 | 1.26E+08 | 1.26E+08 | 960  | 1033 | 125750000 | -0.17811 | 0.005787597 |
| chr3 | 1.26E+08 | 1.26E+08 | 1032 | 1086 | 125800000 | -0.14595 | 0.019197533 |
| chr3 | 1.26E+08 | 1.26E+08 | 1044 | 1120 | 125850000 | -0.17375 | 0.006882146 |
| chr3 | 1.26E+08 | 1.26E+08 | 1035 | 1123 | 125900000 | -0.1901  | 0.003530564 |
| chr3 | 1.26E+08 | 1.26E+08 | 963  | 1086 | 125950000 | -0.24579 | 0.000254087 |
| chr3 | 1.26E+08 | 1.26E+08 | 937  | 1070 | 1.26E+08  | -0.26386 | 9.60E-05    |
| chr3 | 1.26E+08 | 1.26E+08 | 1018 | 1088 | 126050000 | -0.16831 | 0.008502107 |
| chr3 | 1.26E+08 | 1.26E+08 | 1069 | 1112 | 126100000 | -0.12927 | 0.033292625 |
| chr3 | 1.26E+08 | 1.26E+08 | 1080 | 1159 | 126150000 | -0.17422 | 0.006755247 |
| chr3 | 1.26E+08 | 1.26E+08 | 1095 | 1262 | 126200000 | -0.27715 | 4.53E-05    |
| chr3 | 1.26E+08 | 1.26E+08 | 1063 | 1277 | 126250000 | -0.33699 | 1.04E-06    |
| chr3 | 1.26E+08 | 1.26E+08 | 933  | 1061 | 126300000 | -0.25785 | 0.000133614 |
| chr3 | 1.26E+08 | 1.26E+08 | 929  | 968  | 126350000 | -0.1317  | 0.030817046 |
| chr3 | 1.26E+08 | 1.26E+08 | 1052 | 1106 | 126400000 | -0.14459 | 0.020118301 |
| chr3 | 1.26E+08 | 1.27E+08 | 1043 | 1109 | 126450000 | -0.16089 | 0.011250523 |
| chr3 | 1.27E+08 | 1.27E+08 | 1082 | 1163 | 126600000 | -0.17652 | 0.006166029 |
| chr3 | 1.27E+08 | 1.27E+08 | 1163 | 1220 | 126650000 | -0.1414  | 0.022415893 |
| chr3 | 1.27E+08 | 1.27E+08 | 1217 | 1354 | 126700000 | -0.22627 | 0.000680629 |
| chr3 | 1.27E+08 | 1.27E+08 | 1164 | 1368 | 126750000 | -0.30535 | 8.27E-06    |
| chr3 | 1.27E+08 | 1.27E+08 | 1077 | 1232 | 126800000 | -0.26636 | 8.36E-05    |
| chr3 | 1.27E+08 | 1.27E+08 | 1130 | 1269 | 126850000 | -0.23974 | 0.000347312 |
| chr3 | 1.27E+08 | 1.27E+08 | 1166 | 1205 | 126900000 | -0.11984 | 0.044480381 |
| chr3 | 1.27E+08 | 1.27E+08 | 1047 | 1111 | 127050000 | -0.15797 | 0.012529202 |
| chr3 | 1.27E+08 | 1.27E+08 | 1119 | 1162 | 127100000 | -0.12677 | 0.035998802 |
| chr3 | 1.27E+08 | 1.27E+08 | 1124 | 1200 | 127150000 | -0.16676 | 0.009021164 |
| chr3 | 1.27E+08 | 1.27E+08 | 1045 | 1125 | 127200000 | -0.17879 | 0.005629675 |
| chr3 | 1.27E+08 | 1.27E+08 | 1071 | 1190 | 127250000 | -0.22437 | 0.000746269 |
| chr3 | 1.27E+08 | 1.27E+08 | 1052 | 1251 | 127300000 | -0.32232 | 2.78E-06    |
| chr3 | 1.27E+08 | 1.27E+08 | 985  | 1128 | 127350000 | -0.26794 | 7.65E-05    |
| chr3 | 1.27E+08 | 1.27E+08 | 1047 | 1144 | 127400000 | -0.2002  | 0.002282765 |
| chr3 | 1.27E+08 | 1.28E+08 | 1091 | 1153 | 127450000 | -0.15211 | 0.015474545 |
| chr3 | 1.28E+08 | 1.28E+08 | 1004 | 1043 | 127550000 | -0.12735 | 0.035354251 |

|      |          |          |      |      |           |          |             |
|------|----------|----------|------|------|-----------|----------|-------------|
| chr3 | 1.28E+08 | 1.28E+08 | 1040 | 1084 | 127900000 | -0.13215 | 0.030373727 |
| chr3 | 1.28E+08 | 1.28E+08 | 1192 | 1284 | 128100000 | -0.17963 | 0.005442343 |
| chr3 | 1.28E+08 | 1.28E+08 | 1141 | 1358 | 128150000 | -0.32356 | 2.56E-06    |
| chr3 | 1.28E+08 | 1.28E+08 | 1109 | 1264 | 128200000 | -0.26111 | 0.000111797 |
| chr3 | 1.29E+08 | 1.29E+08 | 901  | 938  | 128600000 | -0.13043 | 0.032086833 |
| chr3 | 1.29E+08 | 1.29E+08 | 861  | 888  | 128650000 | -0.11692 | 0.048502676 |
| chr3 | 1.29E+08 | 1.29E+08 | 842  | 896  | 128950000 | -0.16205 | 0.010776166 |
| chr3 | 1.29E+08 | 1.29E+08 | 924  | 995  | 1.29E+08  | -0.17918 | 0.005543758 |
| chr3 | 1.29E+08 | 1.29E+08 | 891  | 974  | 129050000 | -0.20087 | 0.002216166 |
| chr3 | 1.29E+08 | 1.29E+08 | 893  | 933  | 129100000 | -0.13559 | 0.027179548 |
| chr3 | 1.29E+08 | 1.29E+08 | 972  | 1090 | 129250000 | -0.23767 | 0.00038594  |
| chr3 | 1.29E+08 | 1.29E+08 | 1093 | 1276 | 129300000 | -0.29571 | 1.50E-05    |
| chr3 | 1.29E+08 | 1.29E+08 | 1049 | 1083 | 129350000 | -0.11839 | 0.046439067 |
| chr3 | 1.29E+08 | 1.29E+08 | 953  | 829  | 129400000 | 0.128732 | 0.034165015 |
| chr3 | 1.3E+08  | 1.3E+08  | 764  | 827  | 129700000 | -0.18669 | 0.004074306 |
| chr3 | 1.3E+08  | 1.3E+08  | 313  | 351  | 129750000 | -0.23768 | 0.000385775 |
| chr3 | 1.3E+08  | 1.3E+08  | 171  | 177  | 129800000 | -0.12212 | 0.04151994  |
| chr3 | 1.3E+08  | 1.3E+08  | 126  | 139  | 129850000 | -0.21403 | 0.001219408 |
| chr3 | 1.3E+08  | 1.3E+08  | 212  | 227  | 129900000 | -0.171   | 0.007663606 |
| chr3 | 1.31E+08 | 1.31E+08 | 1012 | 881  | 131400000 | 0.127624 | 0.035366095 |
| chr3 | 1.32E+08 | 1.32E+08 | 972  | 843  | 131650000 | 0.133052 | 0.029802385 |
| chr3 | 1.32E+08 | 1.32E+08 | 946  | 797  | 131700000 | 0.174889 | 0.006718826 |
| chr3 | 1.33E+08 | 1.33E+08 | 964  | 1034 | 133150000 | -0.1735  | 0.006949052 |
| chr3 | 1.34E+08 | 1.34E+08 | 1067 | 1123 | 133700000 | -0.14617 | 0.019054707 |
| chr3 | 1.34E+08 | 1.34E+08 | 1026 | 1137 | 133750000 | -0.22057 | 0.000895879 |
| chr3 | 1.34E+08 | 1.34E+08 | 1013 | 1048 | 133800000 | -0.12138 | 0.042470417 |
| chr3 | 1.34E+08 | 1.34E+08 | 924  | 1013 | 134300000 | -0.20504 | 0.001839988 |
| chr3 | 1.34E+08 | 1.34E+08 | 1042 | 1116 | 134350000 | -0.17135 | 0.007558849 |
| chr3 | 1.34E+08 | 1.34E+08 | 1054 | 1136 | 134400000 | -0.18046 | 0.005263127 |
| chr3 | 1.34E+08 | 1.35E+08 | 1014 | 1060 | 134450000 | -0.13638 | 0.02648647  |
| chr3 | 1.35E+08 | 1.35E+08 | 910  | 777  | 135350000 | 0.15558  | 0.013875067 |
| chr3 | 1.35E+08 | 1.36E+08 | 1026 | 1066 | 135500000 | -0.12755 | 0.035137642 |
| chr3 | 1.36E+08 | 1.36E+08 | 848  | 738  | 135800000 | 0.128072 | 0.034876577 |
| chr3 | 1.36E+08 | 1.36E+08 | 923  | 804  | 136350000 | 0.126763 | 0.036321712 |
| chr3 | 1.36E+08 | 1.36E+08 | 905  | 762  | 136400000 | 0.175755 | 0.006493849 |
| chr3 | 1.36E+08 | 1.37E+08 | 838  | 709  | 136450000 | 0.168793 | 0.008506765 |
| chr3 | 1.37E+08 | 1.38E+08 | 964  | 999  | 137500000 | -0.12382 | 0.039427108 |
| chr3 | 1.38E+08 | 1.38E+08 | 946  | 1019 | 137550000 | -0.17961 | 0.005446524 |
| chr3 | 1.38E+08 | 1.38E+08 | 833  | 864  | 137600000 | -0.12509 | 0.037926974 |
| chr3 | 1.38E+08 | 1.38E+08 | 962  | 994  | 137800000 | -0.11958 | 0.044822551 |
| chr3 | 1.38E+08 | 1.38E+08 | 857  | 713  | 138300000 | 0.193021 | 0.003205164 |
| chr3 | 1.38E+08 | 1.39E+08 | 880  | 761  | 138450000 | 0.137235 | 0.026029597 |
| chr3 | 1.38E+08 | 1.39E+08 | 856  | 746  | 138500000 | 0.126063 | 0.037114884 |
| chr3 | 1.39E+08 | 1.39E+08 | 794  | 668  | 138550000 | 0.176919 | 0.006202082 |
| chr3 | 1.39E+08 | 1.39E+08 | 904  | 933  | 138650000 | -0.11793 | 0.04708209  |
| chr3 | 1.39E+08 | 1.39E+08 | 926  | 976  | 138700000 | -0.14824 | 0.017734222 |
| chr3 | 1.39E+08 | 1.39E+08 | 922  | 966  | 138850000 | -0.13963 | 0.023788168 |

|      |          |          |      |      |           |          |             |
|------|----------|----------|------|------|-----------|----------|-------------|
| chr3 | 1.39E+08 | 1.39E+08 | 1039 | 1115 | 139050000 | -0.17422 | 0.006755566 |
| chr3 | 1.4E+08  | 1.4E+08  | 1005 | 1048 | 139950000 | -0.13281 | 0.029735112 |
| chr3 | 1.4E+08  | 1.4E+08  | 1071 | 1107 | 140050000 | -0.12007 | 0.044173409 |
| chr3 | 1.4E+08  | 1.4E+08  | 1046 | 1114 | 140100000 | -0.16324 | 0.010307914 |
| chr3 | 1.4E+08  | 1.4E+08  | 1051 | 1099 | 140150000 | -0.1368  | 0.026122126 |
| chr3 | 1.4E+08  | 1.41E+08 | 952  | 987  | 140500000 | -0.12446 | 0.038664764 |
| chr3 | 1.41E+08 | 1.41E+08 | 900  | 948  | 140650000 | -0.14733 | 0.018302455 |
| chr3 | 1.41E+08 | 1.41E+08 | 985  | 1034 | 140950000 | -0.14241 | 0.021664409 |
| chr3 | 1.41E+08 | 1.41E+08 | 1026 | 1061 | 1.41E+08  | -0.12077 | 0.043258809 |
| chr3 | 1.41E+08 | 1.41E+08 | 1030 | 902  | 141250000 | 0.119073 | 0.045840522 |
| chr3 | 1.41E+08 | 1.41E+08 | 1020 | 885  | 141300000 | 0.132448 | 0.030382888 |
| chr3 | 1.41E+08 | 1.41E+08 | 825  | 869  | 141400000 | -0.14733 | 0.018302455 |
| chr3 | 1.42E+08 | 1.42E+08 | 909  | 789  | 141750000 | 0.131883 | 0.030934291 |
| chr3 | 1.42E+08 | 1.43E+08 | 1034 | 901  | 142500000 | 0.126265 | 0.036884537 |
| chr3 | 1.43E+08 | 1.43E+08 | 1087 | 931  | 142550000 | 0.151127 | 0.016251025 |
| chr3 | 1.43E+08 | 1.43E+08 | 967  | 1022 | 142850000 | -0.15218 | 0.015438291 |
| chr3 | 1.44E+08 | 1.44E+08 | 1067 | 909  | 143800000 | 0.158836 | 0.012333826 |
| chr3 | 1.44E+08 | 1.44E+08 | 1069 | 899  | 143850000 | 0.177497 | 0.006061607 |
| chr3 | 1.44E+08 | 1.44E+08 | 1039 | 890  | 144100000 | 0.150947 | 0.016354267 |
| chr3 | 1.44E+08 | 1.44E+08 | 1037 | 884  | 144350000 | 0.157926 | 0.01274899  |
| chr3 | 1.44E+08 | 1.44E+08 | 1069 | 916  | 144400000 | 0.150471 | 0.016629343 |
| chr3 | 1.44E+08 | 1.45E+08 | 998  | 860  | 144450000 | 0.142331 | 0.021983382 |
| chr3 | 1.44E+08 | 1.45E+08 | 943  | 812  | 144500000 | 0.143406 | 0.021201686 |
| chr3 | 1.45E+08 | 1.45E+08 | 971  | 850  | 144650000 | 0.119637 | 0.045080779 |
| chr3 | 1.45E+08 | 1.45E+08 | 954  | 827  | 144800000 | 0.13373  | 0.02916144  |
| chr3 | 1.45E+08 | 1.45E+08 | 1127 | 958  | 144900000 | 0.162018 | 0.010973665 |
| chr3 | 1.45E+08 | 1.45E+08 | 1032 | 810  | 144950000 | 0.277077 | 4.91E-05    |
| chr3 | 1.45E+08 | 1.45E+08 | 1000 | 786  | 1.45E+08  | 0.275027 | 5.51E-05    |
| chr3 | 1.45E+08 | 1.45E+08 | 1093 | 903  | 145050000 | 0.203124 | 0.002069904 |
| chr3 | 1.45E+08 | 1.45E+08 | 1043 | 904  | 145100000 | 0.133973 | 0.028935047 |
| chr3 | 1.45E+08 | 1.45E+08 | 1047 | 893  | 145350000 | 0.157158 | 0.013108737 |
| chr3 | 1.45E+08 | 1.45E+08 | 999  | 837  | 145400000 | 0.182885 | 0.004882095 |
| chr3 | 1.45E+08 | 1.46E+08 | 983  | 804  | 145450000 | 0.217624 | 0.001071158 |
| chr3 | 1.46E+08 | 1.46E+08 | 1007 | 866  | 145750000 | 0.145253 | 0.019913777 |
| chr3 | 1.46E+08 | 1.46E+08 | 971  | 821  | 145800000 | 0.169717 | 0.00821117  |
| chr3 | 1.46E+08 | 1.46E+08 | 1029 | 853  | 145850000 | 0.198254 | 0.00256132  |
| chr3 | 1.46E+08 | 1.46E+08 | 1056 | 922  | 145900000 | 0.123399 | 0.040264444 |
| chr3 | 1.46E+08 | 1.46E+08 | 1054 | 923  | 145950000 | 0.119101 | 0.045803454 |
| chr3 | 1.46E+08 | 1.46E+08 | 918  | 759  | 146100000 | 0.202022 | 0.002172835 |
| chr3 | 1.46E+08 | 1.46E+08 | 916  | 791  | 146150000 | 0.139298 | 0.02432208  |
| chr3 | 1.46E+08 | 1.46E+08 | 1032 | 873  | 146350000 | 0.169018 | 0.008434037 |
| chr3 | 1.46E+08 | 1.46E+08 | 975  | 825  | 146400000 | 0.168636 | 0.008557728 |
| chr3 | 1.47E+08 | 1.47E+08 | 1112 | 971  | 146600000 | 0.123242 | 0.040457387 |
| chr3 | 1.47E+08 | 1.47E+08 | 1041 | 849  | 146650000 | 0.221762 | 0.000881647 |
| chr3 | 1.47E+08 | 1.47E+08 | 1006 | 864  | 146700000 | 0.147155 | 0.018657346 |
| chr3 | 1.47E+08 | 1.47E+08 | 1012 | 885  | 146750000 | 0.121088 | 0.043170442 |
| chr3 | 1.47E+08 | 1.47E+08 | 896  | 752  | 146800000 | 0.180394 | 0.005399175 |

|      |          |          |      |      |           |          |             |
|------|----------|----------|------|------|-----------|----------|-------------|
| chr3 | 1.47E+08 | 1.47E+08 | 929  | 789  | 146850000 | 0.163282 | 0.010471096 |
| chr3 | 1.47E+08 | 1.47E+08 | 1027 | 887  | 146950000 | 0.139058 | 0.024515541 |
| chr3 | 1.47E+08 | 1.47E+08 | 976  | 832  | 1.47E+08  | 0.157926 | 0.01274899  |
| chr3 | 1.47E+08 | 1.47E+08 | 1030 | 892  | 147050000 | 0.135157 | 0.02785061  |
| chr3 | 1.47E+08 | 1.47E+08 | 1028 | 852  | 147200000 | 0.198543 | 0.002529374 |
| chr3 | 1.47E+08 | 1.47E+08 | 1023 | 869  | 147250000 | 0.163006 | 0.010578838 |
| chr3 | 1.47E+08 | 1.47E+08 | 988  | 863  | 147300000 | 0.122779 | 0.041028742 |
| chr3 | 1.47E+08 | 1.47E+08 | 1017 | 841  | 147350000 | 0.20177  | 0.002197062 |
| chr3 | 1.47E+08 | 1.47E+08 | 950  | 826  | 147400000 | 0.129414 | 0.033443481 |
| chr3 | 1.48E+08 | 1.48E+08 | 1077 | 910  | 147600000 | 0.170708 | 0.007904474 |
| chr3 | 1.48E+08 | 1.48E+08 | 1043 | 896  | 147700000 | 0.146797 | 0.018888851 |
| chr3 | 1.48E+08 | 1.48E+08 | 1047 | 899  | 147750000 | 0.147497 | 0.018439224 |
| chr3 | 1.48E+08 | 1.48E+08 | 1015 | 882  | 147800000 | 0.130257 | 0.032568134 |
| chr3 | 1.48E+08 | 1.48E+08 | 998  | 851  | 147850000 | 0.157509 | 0.012943148 |
| chr3 | 1.48E+08 | 1.48E+08 | 893  | 770  | 148050000 | 0.14143  | 0.022657628 |
| chr3 | 1.49E+08 | 1.49E+08 | 961  | 1029 | 149050000 | -0.17101 | 0.007661636 |
| chr3 | 1.49E+08 | 1.49E+08 | 1072 | 917  | 149250000 | 0.152939 | 0.015244809 |
| chr3 | 1.49E+08 | 1.49E+08 | 1041 | 890  | 149300000 | 0.153721 | 0.014827754 |
| chr3 | 1.49E+08 | 1.5E+08  | 1045 | 907  | 149450000 | 0.131957 | 0.030862075 |
| chr3 | 1.49E+08 | 1.5E+08  | 1029 | 881  | 149500000 | 0.151657 | 0.015950925 |
| chr3 | 1.5E+08  | 1.5E+08  | 927  | 762  | 150300000 | 0.210407 | 0.001493655 |
| chr3 | 1.5E+08  | 1.5E+08  | 937  | 805  | 150350000 | 0.146688 | 0.018959225 |
| chr3 | 1.5E+08  | 1.5E+08  | 939  | 800  | 150400000 | 0.158753 | 0.012371103 |
| chr3 | 1.51E+08 | 1.51E+08 | 943  | 816  | 151400000 | 0.136317 | 0.026821618 |
| chr3 | 1.51E+08 | 1.52E+08 | 974  | 833  | 151450000 | 0.153234 | 0.015086748 |
| chr3 | 1.52E+08 | 1.52E+08 | 1034 | 886  | 151800000 | 0.150486 | 0.016620481 |
| chr3 | 1.52E+08 | 1.52E+08 | 1019 | 851  | 151850000 | 0.187551 | 0.004031301 |
| chr3 | 1.52E+08 | 1.52E+08 | 1020 | 852  | 152050000 | 0.187272 | 0.004078193 |
| chr3 | 1.52E+08 | 1.52E+08 | 996  | 866  | 152350000 | 0.129407 | 0.033450841 |
| chr3 | 1.52E+08 | 1.52E+08 | 1029 | 892  | 152400000 | 0.133756 | 0.029137634 |
| chr3 | 1.54E+08 | 1.55E+08 | 1021 | 877  | 154450000 | 0.146962 | 0.018781631 |
| chr3 | 1.54E+08 | 1.55E+08 | 1006 | 807  | 154500000 | 0.245618 | 0.000270723 |
| chr3 | 1.55E+08 | 1.55E+08 | 916  | 747  | 154550000 | 0.221868 | 0.000877236 |
| chr3 | 1.55E+08 | 1.55E+08 | 1008 | 839  | 154850000 | 0.192381 | 0.003293243 |
| chr3 | 1.55E+08 | 1.55E+08 | 1057 | 862  | 154900000 | 0.221844 | 0.000878225 |
| chr3 | 1.55E+08 | 1.55E+08 | 963  | 815  | 154950000 | 0.168364 | 0.008647052 |
| chr3 | 1.55E+08 | 1.55E+08 | 958  | 835  | 1.55E+08  | 0.125878 | 0.037327685 |
| chr3 | 1.55E+08 | 1.55E+08 | 929  | 814  | 155250000 | 0.118278 | 0.046930272 |
| chr3 | 1.55E+08 | 1.55E+08 | 1014 | 841  | 155350000 | 0.197508 | 0.002645236 |
| chr3 | 1.55E+08 | 1.56E+08 | 893  | 775  | 155500000 | 0.132092 | 0.030729413 |
| chr3 | 1.56E+08 | 1.56E+08 | 791  | 845  | 155750000 | -0.16765 | 0.008722473 |
| chr3 | 1.58E+08 | 1.58E+08 | 946  | 827  | 157700000 | 0.121581 | 0.042536813 |
| chr3 | 1.58E+08 | 1.58E+08 | 997  | 870  | 157850000 | 0.124206 | 0.039288227 |
| chr3 | 1.58E+08 | 1.58E+08 | 982  | 854  | 157900000 | 0.129115 | 0.033758189 |
| chr3 | 1.58E+08 | 1.58E+08 | 963  | 834  | 158150000 | 0.135117 | 0.027886954 |
| chr3 | 1.58E+08 | 1.58E+08 | 906  | 769  | 158200000 | 0.164156 | 0.010135241 |
| chr3 | 1.58E+08 | 1.58E+08 | 939  | 814  | 158250000 | 0.133725 | 0.02916666  |

|      |          |          |      |     |           |          |             |
|------|----------|----------|------|-----|-----------|----------|-------------|
| chr3 | 1.58E+08 | 1.58E+08 | 968  | 820 | 158300000 | 0.167011 | 0.009102917 |
| chr3 | 1.59E+08 | 1.59E+08 | 1070 | 931 | 158550000 | 0.128386 | 0.034536581 |
| chr3 | 1.59E+08 | 1.59E+08 | 1111 | 955 | 158600000 | 0.145914 | 0.01946899  |
| chr3 | 1.59E+08 | 1.59E+08 | 1096 | 931 | 158950000 | 0.163023 | 0.010572288 |
| chr3 | 1.59E+08 | 1.59E+08 | 1072 | 881 | 1.59E+08  | 0.210719 | 0.001472574 |
| chr3 | 1.6E+08  | 1.6E+08  | 961  | 835 | 160200000 | 0.130388 | 0.032433825 |
| chr3 | 1.6E+08  | 1.6E+08  | 1026 | 878 | 160250000 | 0.152366 | 0.01555717  |
| chr3 | 1.61E+08 | 1.61E+08 | 953  | 994 | 161100000 | -0.13314 | 0.029424349 |
| chr3 | 1.61E+08 | 1.62E+08 | 998  | 874 | 161500000 | 0.119035 | 0.045892758 |
| chr3 | 1.62E+08 | 1.62E+08 | 1031 | 898 | 161550000 | 0.126885 | 0.036185089 |
| chr3 | 1.62E+08 | 1.62E+08 | 1042 | 906 | 161850000 | 0.129401 | 0.033457553 |
| chr3 | 1.62E+08 | 1.62E+08 | 973  | 826 | 161900000 | 0.163926 | 0.010222463 |
| chr3 | 1.62E+08 | 1.62E+08 | 973  | 822 | 161950000 | 0.17093  | 0.00783727  |
| chr3 | 1.62E+08 | 1.62E+08 | 988  | 828 | 1.62E+08  | 0.182509 | 0.00495735  |
| chr3 | 1.62E+08 | 1.62E+08 | 911  | 744 | 162400000 | 0.219777 | 0.000968336 |
| chr3 | 1.62E+08 | 1.63E+08 | 978  | 806 | 162450000 | 0.206683 | 0.001766867 |
| chr3 | 1.62E+08 | 1.63E+08 | 898  | 773 | 162500000 | 0.143875 | 0.020868088 |
| chr3 | 1.63E+08 | 1.63E+08 | 869  | 759 | 162650000 | 0.122885 | 0.040897625 |
| chr3 | 1.63E+08 | 1.63E+08 | 964  | 806 | 162700000 | 0.185882 | 0.004319106 |
| chr3 | 1.63E+08 | 1.63E+08 | 983  | 851 | 162750000 | 0.135661 | 0.027399894 |
| chr3 | 1.63E+08 | 1.63E+08 | 948  | 805 | 162900000 | 0.163527 | 0.010376006 |
| chr3 | 1.63E+08 | 1.63E+08 | 958  | 780 | 162950000 | 0.22418  | 0.000785745 |
| chr3 | 1.63E+08 | 1.63E+08 | 930  | 803 | 1.63E+08  | 0.139459 | 0.024193017 |
| chr3 | 1.63E+08 | 1.63E+08 | 943  | 804 | 163050000 | 0.15769  | 0.012858274 |
| chr3 | 1.63E+08 | 1.63E+08 | 927  | 786 | 163100000 | 0.165668 | 0.009576345 |
| chr3 | 1.63E+08 | 1.63E+08 | 924  | 749 | 163150000 | 0.230555 | 0.000577146 |
| chr3 | 1.63E+08 | 1.63E+08 | 903  | 699 | 163200000 | 0.297062 | 1.52E-05    |
| chr3 | 1.63E+08 | 1.63E+08 | 953  | 781 | 163250000 | 0.214782 | 0.001222327 |
| chr3 | 1.63E+08 | 1.63E+08 | 1013 | 846 | 163300000 | 0.187533 | 0.004034378 |
| chr3 | 1.63E+08 | 1.63E+08 | 974  | 846 | 163400000 | 0.130892 | 0.031921753 |
| chr3 | 1.63E+08 | 1.64E+08 | 1023 | 844 | 163450000 | 0.205119 | 0.00189461  |
| chr3 | 1.64E+08 | 1.64E+08 | 923  | 787 | 163900000 | 0.157595 | 0.012902737 |
| chr3 | 1.64E+08 | 1.64E+08 | 1019 | 866 | 163950000 | 0.162343 | 0.010842338 |
| chr3 | 1.64E+08 | 1.64E+08 | 997  | 804 | 1.64E+08  | 0.238026 | 0.00039844  |
| chr3 | 1.64E+08 | 1.64E+08 | 881  | 734 | 164050000 | 0.19099  | 0.003492182 |
| chr3 | 1.64E+08 | 1.64E+08 | 1049 | 878 | 164300000 | 0.18435  | 0.004599147 |
| chr3 | 1.64E+08 | 1.64E+08 | 1024 | 858 | 164350000 | 0.182794 | 0.004900155 |
| chr3 | 1.64E+08 | 1.64E+08 | 935  | 817 | 164400000 | 0.122259 | 0.041678347 |
| chr3 | 1.64E+08 | 1.65E+08 | 1001 | 855 | 164450000 | 0.155074 | 0.014129116 |
| chr3 | 1.64E+08 | 1.65E+08 | 1009 | 870 | 164500000 | 0.141467 | 0.022629508 |
| chr3 | 1.65E+08 | 1.65E+08 | 1034 | 870 | 164750000 | 0.176777 | 0.006237043 |
| chr3 | 1.65E+08 | 1.65E+08 | 1024 | 868 | 1.65E+08  | 0.166077 | 0.009430033 |
| chr3 | 1.65E+08 | 1.65E+08 | 986  | 860 | 165050000 | 0.124879 | 0.038489032 |
| chr3 | 1.65E+08 | 1.65E+08 | 974  | 819 | 165250000 | 0.177687 | 0.006016169 |
| chr3 | 1.65E+08 | 1.65E+08 | 937  | 780 | 165300000 | 0.192203 | 0.003318117 |
| chr3 | 1.65E+08 | 1.65E+08 | 997  | 859 | 165350000 | 0.142564 | 0.021812468 |
| chr3 | 1.65E+08 | 1.66E+08 | 1034 | 863 | 165500000 | 0.188432 | 0.003886542 |

|      |          |          |      |     |           |          |             |
|------|----------|----------|------|-----|-----------|----------|-------------|
| chr3 | 1.66E+08 | 1.66E+08 | 1032 | 799 | 165550000 | 0.296804 | 1.54E-05    |
| chr3 | 1.66E+08 | 1.66E+08 | 956  | 741 | 165600000 | 0.295165 | 1.70E-05    |
| chr3 | 1.66E+08 | 1.66E+08 | 904  | 746 | 165650000 | 0.204775 | 0.001923833 |
| chr3 | 1.66E+08 | 1.66E+08 | 995  | 854 | 165900000 | 0.148089 | 0.018066064 |
| chr3 | 1.66E+08 | 1.66E+08 | 972  | 809 | 166050000 | 0.192445 | 0.003284384 |
| chr3 | 1.66E+08 | 1.66E+08 | 941  | 810 | 166100000 | 0.143901 | 0.020849878 |
| chr3 | 1.66E+08 | 1.66E+08 | 988  | 816 | 166250000 | 0.20357  | 0.002029461 |
| chr3 | 1.66E+08 | 1.66E+08 | 937  | 760 | 166300000 | 0.229678 | 0.000602435 |
| chr3 | 1.66E+08 | 1.66E+08 | 1067 | 929 | 166400000 | 0.127438 | 0.035570609 |
| chr3 | 1.66E+08 | 1.67E+08 | 1015 | 877 | 166450000 | 0.138459 | 0.025004762 |
| chr3 | 1.67E+08 | 1.67E+08 | 956  | 810 | 1.67E+08  | 0.166717 | 0.009204901 |
| chr3 | 1.67E+08 | 1.67E+08 | 1040 | 889 | 167050000 | 0.153956 | 0.014704098 |
| chr3 | 1.67E+08 | 1.67E+08 | 1051 | 919 | 167400000 | 0.121254 | 0.042956243 |
| chr3 | 1.68E+08 | 1.68E+08 | 1020 | 883 | 167550000 | 0.135712 | 0.027354123 |
| chr3 | 1.68E+08 | 1.68E+08 | 1059 | 921 | 167600000 | 0.129058 | 0.033818957 |
| chr3 | 1.68E+08 | 1.68E+08 | 1018 | 893 | 167650000 | 0.116634 | 0.049249803 |
| chr3 | 1.68E+08 | 1.68E+08 | 1080 | 907 | 168200000 | 0.179485 | 0.00559975  |
| chr3 | 1.69E+08 | 1.69E+08 | 1008 | 876 | 169100000 | 0.130121 | 0.032708295 |
| chr3 | 1.69E+08 | 1.69E+08 | 850  | 885 | 169400000 | -0.13059 | 0.031930503 |
| chr3 | 1.7E+08  | 1.7E+08  | 853  | 748 | 169900000 | 0.117136 | 0.048532133 |
| chr3 | 1.71E+08 | 1.71E+08 | 945  | 820 | 171250000 | 0.132319 | 0.030508465 |
| chr3 | 1.72E+08 | 1.72E+08 | 1005 | 875 | 171600000 | 0.127469 | 0.035536504 |
| chr3 | 1.72E+08 | 1.72E+08 | 1080 | 934 | 171800000 | 0.137165 | 0.026089443 |
| chr3 | 1.72E+08 | 1.72E+08 | 780  | 804 | 172400000 | -0.11609 | 0.04969099  |
| chr3 | 1.72E+08 | 1.73E+08 | 1004 | 855 | 172500000 | 0.159391 | 0.012086545 |
| chr3 | 1.73E+08 | 1.73E+08 | 1001 | 855 | 172900000 | 0.155074 | 0.014129116 |
| chr3 | 1.73E+08 | 1.73E+08 | 1036 | 895 | 173250000 | 0.138693 | 0.024813201 |
| chr3 | 1.73E+08 | 1.74E+08 | 1093 | 934 | 173450000 | 0.154427 | 0.01445946  |
| chr3 | 1.73E+08 | 1.74E+08 | 1155 | 920 | 173500000 | 0.255815 | 0.000158583 |
| chr3 | 1.74E+08 | 1.74E+08 | 1071 | 889 | 173550000 | 0.196331 | 0.002782802 |
| chr3 | 1.74E+08 | 1.74E+08 | 1038 | 860 | 173800000 | 0.199026 | 0.002476901 |
| chr3 | 1.74E+08 | 1.74E+08 | 1029 | 860 | 173950000 | 0.186463 | 0.004216915 |
| chr3 | 1.74E+08 | 1.74E+08 | 1063 | 886 | 1.74E+08  | 0.190391 | 0.003581134 |
| chr3 | 1.74E+08 | 1.74E+08 | 1130 | 989 | 174050000 | 0.119909 | 0.044717825 |
| chr3 | 1.74E+08 | 1.74E+08 | 971  | 784 | 174300000 | 0.236246 | 0.000435606 |
| chr3 | 1.74E+08 | 1.74E+08 | 979  | 788 | 174350000 | 0.240741 | 0.000347403 |
| chr3 | 1.74E+08 | 1.74E+08 | 983  | 823 | 174400000 | 0.183927 | 0.004679281 |
| chr3 | 1.74E+08 | 1.75E+08 | 960  | 792 | 174450000 | 0.205162 | 0.001891009 |
| chr3 | 1.74E+08 | 1.75E+08 | 956  | 795 | 174500000 | 0.193684 | 0.003116245 |
| chr3 | 1.75E+08 | 1.75E+08 | 988  | 807 | 174550000 | 0.219571 | 0.00097777  |
| chr3 | 1.75E+08 | 1.75E+08 | 1005 | 844 | 174600000 | 0.179509 | 0.005594429 |
| chr3 | 1.75E+08 | 1.75E+08 | 1063 | 924 | 174950000 | 0.129805 | 0.033035186 |
| chr3 | 1.75E+08 | 1.75E+08 | 994  | 861 | 175150000 | 0.134861 | 0.028118525 |
| chr3 | 1.75E+08 | 1.75E+08 | 1027 | 874 | 175200000 | 0.160359 | 0.011665517 |
| chr3 | 1.75E+08 | 1.75E+08 | 1036 | 900 | 175250000 | 0.130655 | 0.03216178  |
| chr3 | 1.75E+08 | 1.75E+08 | 1021 | 893 | 175350000 | 0.120879 | 0.043441587 |
| chr3 | 1.75E+08 | 1.75E+08 | 1043 | 857 | 175400000 | 0.211    | 0.001453856 |



|      |          |          |      |      |           |          |             |
|------|----------|----------|------|------|-----------|----------|-------------|
| chr3 | 1.76E+08 | 1.76E+08 | 876  | 702  | 175550000 | 0.247088 | 0.000250912 |
| chr3 | 1.76E+08 | 1.76E+08 | 872  | 726  | 175600000 | 0.191987 | 0.003348577 |
| chr3 | 1.76E+08 | 1.76E+08 | 927  | 797  | 175650000 | 0.145618 | 0.019667361 |
| chr3 | 1.76E+08 | 1.76E+08 | 1044 | 905  | 175850000 | 0.13376  | 0.029133285 |
| chr3 | 1.76E+08 | 1.76E+08 | 1028 | 860  | 175900000 | 0.18506  | 0.004467382 |
| chr3 | 1.76E+08 | 1.76E+08 | 1085 | 857  | 175950000 | 0.267956 | 8.20E-05    |
| chr3 | 1.76E+08 | 1.76E+08 | 1083 | 820  | 1.76E+08  | 0.328966 | 2.03E-06    |
| chr3 | 1.76E+08 | 1.76E+08 | 987  | 866  | 176050000 | 0.116311 | 0.049715221 |
| chr3 | 1.76E+08 | 1.76E+08 | 989  | 865  | 176350000 | 0.120899 | 0.043416115 |
| chr3 | 1.77E+08 | 1.77E+08 | 964  | 811  | 176700000 | 0.176959 | 0.006192186 |
| chr3 | 1.77E+08 | 1.77E+08 | 1003 | 870  | 176750000 | 0.132863 | 0.029983431 |
| chr3 | 1.77E+08 | 1.77E+08 | 902  | 771  | 176900000 | 0.154025 | 0.014668347 |
| chr3 | 1.77E+08 | 1.77E+08 | 852  | 734  | 176950000 | 0.142702 | 0.021711438 |
| chr3 | 1.78E+08 | 1.78E+08 | 1066 | 912  | 177800000 | 0.15273  | 0.015358338 |
| chr3 | 1.78E+08 | 1.78E+08 | 1042 | 896  | 177850000 | 0.145413 | 0.019805472 |
| chr3 | 1.79E+08 | 1.79E+08 | 780  | 684  | 178800000 | 0.117106 | 0.04857432  |
| chr3 | 1.79E+08 | 1.79E+08 | 916  | 786  | 179100000 | 0.148447 | 0.017843671 |
| chr3 | 1.79E+08 | 1.79E+08 | 953  | 829  | 179300000 | 0.128732 | 0.034165015 |
| chr3 | 1.8E+08  | 1.8E+08  | 992  | 864  | 180350000 | 0.126937 | 0.036127101 |
| chr3 | 1.81E+08 | 1.81E+08 | 1028 | 862  | 180550000 | 0.181709 | 0.005120538 |
| chr3 | 1.81E+08 | 1.81E+08 | 948  | 815  | 180600000 | 0.145715 | 0.019602031 |
| chr3 | 1.81E+08 | 1.81E+08 | 960  | 822  | 180700000 | 0.151524 | 0.016025781 |
| chr3 | 1.81E+08 | 1.81E+08 | 876  | 749  | 180750000 | 0.153593 | 0.014895204 |
| chr3 | 1.81E+08 | 1.81E+08 | 942  | 767  | 180800000 | 0.224129 | 0.000787666 |
| chr3 | 1.81E+08 | 1.81E+08 | 993  | 826  | 180850000 | 0.19328  | 0.003170165 |
| chr3 | 1.82E+08 | 1.82E+08 | 1099 | 938  | 182300000 | 0.15616  | 0.013589093 |
| chr3 | 1.82E+08 | 1.83E+08 | 986  | 861  | 182500000 | 0.123203 | 0.040505471 |
| chr3 | 1.83E+08 | 1.83E+08 | 908  | 790  | 182800000 | 0.128468 | 0.034448407 |
| chr3 | 1.83E+08 | 1.83E+08 | 886  | 760  | 183100000 | 0.148936 | 0.017543552 |
| chr3 | 1.83E+08 | 1.83E+08 | 941  | 815  | 183350000 | 0.135023 | 0.027971639 |
| chr3 | 1.84E+08 | 1.84E+08 | 1057 | 1134 | 184300000 | -0.17382 | 0.006863678 |
| chr3 | 1.84E+08 | 1.84E+08 | 1075 | 1120 | 184350000 | -0.13153 | 0.030981292 |
| chr3 | 1.85E+08 | 1.85E+08 | 912  | 769  | 185100000 | 0.173678 | 0.007044676 |
| chr3 | 1.85E+08 | 1.86E+08 | 993  | 863  | 185500000 | 0.130061 | 0.032769848 |
| chr3 | 1.86E+08 | 1.86E+08 | 1006 | 870  | 186200000 | 0.137171 | 0.026084203 |
| chr3 | 1.87E+08 | 1.87E+08 | 944  | 985  | 186800000 | -0.13371 | 0.028890763 |
| chr3 | 1.89E+08 | 1.89E+08 | 1041 | 865  | 189100000 | 0.194826 | 0.002968181 |
| chr3 | 1.89E+08 | 1.89E+08 | 1064 | 866  | 189150000 | 0.224687 | 0.000766874 |
| chr3 | 1.89E+08 | 1.89E+08 | 1074 | 938  | 189350000 | 0.122962 | 0.040801342 |
| chr3 | 1.89E+08 | 1.89E+08 | 1091 | 927  | 189400000 | 0.162638 | 0.010724489 |
| chr3 | 1.9E+08  | 1.9E+08  | 1060 | 924  | 189550000 | 0.125728 | 0.03750024  |
| chr3 | 1.9E+08  | 1.9E+08  | 1070 | 912  | 189600000 | 0.158133 | 0.012653332 |
| chr3 | 1.9E+08  | 1.9E+08  | 997  | 858  | 189750000 | 0.144244 | 0.020608879 |
| chr3 | 1.9E+08  | 1.9E+08  | 1059 | 926  | 190100000 | 0.121247 | 0.042965791 |
| chr3 | 1.91E+08 | 1.91E+08 | 1049 | 905  | 190550000 | 0.140653 | 0.023252573 |
| chr3 | 1.91E+08 | 1.91E+08 | 967  | 811  | 190600000 | 0.181442 | 0.005175974 |
| chr3 | 1.91E+08 | 1.91E+08 | 915  | 771  | 190950000 | 0.174669 | 0.006776934 |

|       |          |          |      |      |           |          |             |
|-------|----------|----------|------|------|-----------|----------|-------------|
| chr3  | 1.91E+08 | 1.91E+08 | 1048 | 897  | 191100000 | 0.152087 | 0.015711178 |
| chr3  | 1.91E+08 | 1.91E+08 | 1031 | 872  | 191150000 | 0.169273 | 0.008352239 |
| chr3  | 1.91E+08 | 1.91E+08 | 987  | 851  | 191400000 | 0.141519 | 0.02259012  |
| chr3  | 1.91E+08 | 1.92E+08 | 1036 | 884  | 191450000 | 0.156534 | 0.013407205 |
| chr3  | 1.91E+08 | 1.92E+08 | 976  | 842  | 191500000 | 0.140689 | 0.023224762 |
| chr3  | 1.92E+08 | 1.92E+08 | 956  | 828  | 191550000 | 0.135008 | 0.027985039 |
| chr3  | 1.92E+08 | 1.92E+08 | 885  | 754  | 191600000 | 0.158741 | 0.012376614 |
| chr3  | 1.92E+08 | 1.92E+08 | 971  | 801  | 191650000 | 0.205297 | 0.001879668 |
| chr3  | 1.92E+08 | 1.92E+08 | 1050 | 920  | 191700000 | 0.118312 | 0.046883588 |
| chr3  | 1.92E+08 | 1.92E+08 | 1103 | 947  | 191950000 | 0.147625 | 0.018357967 |
| chr3  | 1.92E+08 | 1.92E+08 | 1106 | 943  | 1.92E+08  | 0.15765  | 0.01287719  |
| chr3  | 1.93E+08 | 1.93E+08 | 901  | 766  | 192650000 | 0.161811 | 0.011058087 |
| chr3  | 1.93E+08 | 1.93E+08 | 802  | 687  | 192700000 | 0.15092  | 0.016369347 |
| chr3  | 1.93E+08 | 1.93E+08 | 885  | 918  | 193150000 | -0.12519 | 0.037808053 |
| chr3  | 1.93E+08 | 1.93E+08 | 1000 | 868  | 193350000 | 0.131861 | 0.030955879 |
| chr3  | 1.94E+08 | 1.94E+08 | 975  | 1014 | 193650000 | -0.12896 | 0.033620948 |
| chr3  | 1.94E+08 | 1.94E+08 | 1005 | 1041 | 193900000 | -0.12315 | 0.040250695 |
| chr3  | 1.94E+08 | 1.94E+08 | 995  | 1062 | 194050000 | -0.16639 | 0.009151671 |
| chr3  | 1.94E+08 | 1.94E+08 | 1042 | 1110 | 194100000 | -0.16358 | 0.010177964 |
| chr3  | 1.94E+08 | 1.94E+08 | 905  | 952  | 194400000 | -0.14542 | 0.019555775 |
| chr3  | 1.94E+08 | 1.95E+08 | 989  | 1051 | 194450000 | -0.16009 | 0.011588663 |
| chr3  | 1.95E+08 | 1.95E+08 | 1050 | 1165 | 194750000 | -0.22231 | 0.000824302 |
| chr3  | 1.95E+08 | 1.95E+08 | 1020 | 1102 | 194800000 | -0.18393 | 0.004567749 |
| chr3  | 1.95E+08 | 1.95E+08 | 941  | 973  | 1.95E+08  | -0.12062 | 0.043452771 |
| chr3  | 1.95E+08 | 1.95E+08 | 839  | 865  | 195300000 | -0.1164  | 0.049244771 |
| chr3  | 1.96E+08 | 1.96E+08 | 647  | 672  | 195650000 | -0.12707 | 0.03566915  |
| chr3  | 1.96E+08 | 1.96E+08 | 296  | 314  | 195700000 | -0.15754 | 0.012727578 |
| chr3  | 1.97E+08 | 1.97E+08 | 946  | 992  | 196650000 | -0.14087 | 0.022818859 |
| chr3  | 1.97E+08 | 1.97E+08 | 970  | 1011 | 196700000 | -0.1321  | 0.03042718  |
| chr3  | 1.97E+08 | 1.97E+08 | 994  | 870  | 196800000 | 0.119859 | 0.044784255 |
| chr3  | 1.97E+08 | 1.97E+08 | 1023 | 881  | 196850000 | 0.14322  | 0.021335111 |
| chr3  | 1.97E+08 | 1.97E+08 | 841  | 883  | 197150000 | -0.14268 | 0.021469391 |
| chr3  | 1.97E+08 | 1.97E+08 | 971  | 1036 | 197200000 | -0.16585 | 0.009339534 |
| chr3  | 1.97E+08 | 1.97E+08 | 974  | 1067 | 197250000 | -0.20394 | 0.001933294 |
| chr3  | 1.97E+08 | 1.97E+08 | 533  | 550  | 197400000 | -0.11767 | 0.047442828 |
| chr3  | 1.98E+08 | 1.98E+08 | 55   | 58   | 197900000 | -0.14899 | 0.017274353 |
| chr3  | 1.98E+08 | 1.98E+08 | 10   | 12   | 197950000 | -0.33541 | 1.16E-06    |
| chr12 | 150001   | 250000   | 888  | 930  | 2.00E+05  | -0.13904 | 0.024256366 |
| chr12 | 200001   | 300000   | 1087 | 1198 | 250000    | -0.21265 | 0.001300414 |
| chr12 | 250001   | 350000   | 1109 | 1171 | 3.00E+05  | -0.15085 | 0.01618078  |
| chr12 | 550001   | 650000   | 910  | 991  | 6.00E+05  | -0.19539 | 0.002815775 |
| chr12 | 600001   | 700000   | 977  | 1037 | 650000    | -0.15836 | 0.012352483 |
| chr12 | 700001   | 800000   | 949  | 825  | 750000    | 0.129642 | 0.033204712 |
| chr12 | 850001   | 950000   | 929  | 814  | 9.00E+05  | 0.118278 | 0.046930272 |
| chr12 | 1050001  | 1150000  | 812  | 843  | 1100000   | -0.12642 | 0.036389254 |
| chr12 | 1150001  | 1250000  | 883  | 733  | 1200000   | 0.196228 | 0.002795136 |
| chr12 | 1200001  | 1300000  | 1013 | 839  | 1250000   | 0.19952  | 0.002424296 |

|       |         |         |      |      |          |          |             |
|-------|---------|---------|------|------|----------|----------|-------------|
| chr12 | 1700001 | 1800000 | 936  | 978  | 1750000  | -0.1357  | 0.027082966 |
| chr12 | 1850001 | 1950000 | 1042 | 1138 | 1900000  | -0.19952 | 0.002352167 |
| chr12 | 1900001 | 2000000 | 1133 | 1208 | 1950000  | -0.16484 | 0.009703094 |
| chr12 | 1950001 | 2050000 | 1063 | 1185 | 2.00E+06 | -0.22912 | 0.000592013 |
| chr12 | 2000001 | 2100000 | 988  | 1112 | 2050000  | -0.24295 | 0.000294538 |
| chr12 | 2200001 | 2300000 | 1001 | 1047 | 2250000  | -0.13719 | 0.025788598 |
| chr12 | 2500001 | 2600000 | 1151 | 1206 | 2550000  | -0.13971 | 0.023720321 |
| chr12 | 2550001 | 2650000 | 1142 | 1231 | 2600000  | -0.18064 | 0.005224794 |
| chr12 | 2600001 | 2700000 | 1109 | 1176 | 2650000  | -0.157   | 0.012979942 |
| chr12 | 2650001 | 2750000 | 1106 | 1161 | 2700000  | -0.14239 | 0.021681984 |
| chr12 | 2700001 | 2800000 | 1097 | 1148 | 2750000  | -0.13793 | 0.025167045 |
| chr12 | 2850001 | 2950000 | 936  | 981  | 2900000  | -0.14012 | 0.023403581 |
| chr12 | 2900001 | 3000000 | 907  | 962  | 2950000  | -0.15731 | 0.012836225 |
| chr12 | 3150001 | 3250000 | 969  | 1008 | 3200000  | -0.1293  | 0.033258898 |
| chr12 | 3250001 | 3350000 | 1132 | 1205 | 3300000  | -0.16253 | 0.010584492 |
| chr12 | 3300001 | 3400000 | 1111 | 1274 | 3350000  | -0.26988 | 6.86E-05    |
| chr12 | 3350001 | 3450000 | 1151 | 1238 | 3400000  | -0.1775  | 0.005930983 |
| chr12 | 3400001 | 3500000 | 1084 | 1163 | 3450000  | -0.17386 | 0.006852583 |
| chr12 | 3450001 | 3550000 | 904  | 988  | 3500000  | -0.20056 | 0.002246533 |
| chr12 | 3550001 | 3650000 | 1041 | 1085 | 3600000  | -0.1321  | 0.030428516 |
| chr12 | 3600001 | 3700000 | 1045 | 1106 | 3650000  | -0.15422 | 0.014352513 |
| chr12 | 3650001 | 3750000 | 1129 | 1167 | 3700000  | -0.12013 | 0.044091007 |
| chr12 | 3800001 | 3900000 | 992  | 1036 | 3850000  | -0.13498 | 0.02772066  |
| chr12 | 4250001 | 4350000 | 993  | 1031 | 4300000  | -0.12655 | 0.036247347 |
| chr12 | 4300001 | 4400000 | 1100 | 1157 | 4350000  | -0.14526 | 0.019662484 |
| chr12 | 4850001 | 4950000 | 997  | 1078 | 4900000  | -0.18506 | 0.004358361 |
| chr12 | 4900001 | 5000000 | 1027 | 1072 | 4950000  | -0.13424 | 0.028397795 |
| chr12 | 5150001 | 5250000 | 994  | 1076 | 5200000  | -0.18673 | 0.004066565 |
| chr12 | 5200001 | 5300000 | 961  | 995  | 5250000  | -0.12253 | 0.04101033  |
| chr12 | 5500001 | 5600000 | 1127 | 1167 | 5550000  | -0.12269 | 0.040815202 |
| chr12 | 5900001 | 6000000 | 1045 | 1103 | 5950000  | -0.1503  | 0.016498789 |
| chr12 | 5950001 | 6050000 | 1022 | 1061 | 6.00E+06 | -0.1264  | 0.036415748 |
| chr12 | 6000001 | 6100000 | 997  | 1036 | 6050000  | -0.12773 | 0.034938438 |
| chr12 | 6050001 | 6150000 | 836  | 892  | 6100000  | -0.16591 | 0.009318292 |
| chr12 | 6300001 | 6400000 | 967  | 1018 | 6350000  | -0.14652 | 0.018824541 |
| chr12 | 6350001 | 6450000 | 959  | 1006 | 6400000  | -0.1414  | 0.022417753 |
| chr12 | 6400001 | 6500000 | 1027 | 1105 | 6450000  | -0.17798 | 0.005816413 |
| chr12 | 6450001 | 6550000 | 933  | 991  | 6500000  | -0.15938 | 0.011897144 |
| chr12 | 6650001 | 6750000 | 919  | 974  | 6700000  | -0.15623 | 0.013349058 |
| chr12 | 6800001 | 6900000 | 915  | 982  | 6850000  | -0.17432 | 0.006728104 |
| chr12 | 6850001 | 6950000 | 945  | 1089 | 6900000  | -0.27699 | 4.57E-05    |
| chr12 | 6900001 | 7000000 | 957  | 1098 | 6950000  | -0.27066 | 6.56E-05    |
| chr12 | 6950001 | 7050000 | 973  | 1158 | 7.00E+06 | -0.3235  | 2.58E-06    |
| chr12 | 7000001 | 7100000 | 975  | 1153 | 7050000  | -0.31429 | 4.69E-06    |
| chr12 | 7150001 | 7250000 | 497  | 533  | 7200000  | -0.17326 | 0.007015312 |
| chr12 | 7200001 | 7300000 | 647  | 736  | 7250000  | -0.25831 | 0.00013028  |
| chr12 | 7250001 | 7350000 | 1036 | 1133 | 7300000  | -0.2015  | 0.002155462 |

|       |          |          |      |      |          |          |             |
|-------|----------|----------|------|------|----------|----------|-------------|
| chr12 | 7650001  | 7750000  | 755  | 662  | 7700000  | 0.117274 | 0.048336382 |
| chr12 | 8050001  | 8150000  | 672  | 568  | 8100000  | 0.170199 | 0.008060911 |
| chr12 | 8250001  | 8350000  | 557  | 583  | 8300000  | -0.13819 | 0.024952031 |
| chr12 | 8300001  | 8400000  | 172  | 204  | 8350000  | -0.31853 | 3.56E-06    |
| chr12 | 8450001  | 8550000  | 96   | 115  | 8500000  | -0.3329  | 1.38E-06    |
| chr12 | 8500001  | 8600000  | 100  | 121  | 8550000  | -0.34738 | 5.08E-07    |
| chr12 | 8800001  | 8900000  | 951  | 827  | 8850000  | 0.129186 | 0.033683122 |
| chr12 | 8950001  | 9050000  | 826  | 721  | 9.00E+06 | 0.123771 | 0.039812764 |
| chr12 | 9000001  | 9100000  | 910  | 784  | 9050000  | 0.142641 | 0.021755666 |
| chr12 | 9200001  | 9300000  | 989  | 1027 | 9250000  | -0.12677 | 0.036005831 |
| chr12 | 9250001  | 9350000  | 955  | 1001 | 9300000  | -0.14024 | 0.023306162 |
| chr12 | 9550001  | 9650000  | 100  | 82   | 9600000  | 0.213932 | 0.001271172 |
| chr12 | 9650001  | 9750000  | 147  | 116  | 9700000  | 0.26932  | 7.60E-05    |
| chr12 | 9700001  | 9800000  | 536  | 443  | 9750000  | 0.202555 | 0.002122539 |
| chr12 | 10150001 | 10250000 | 1007 | 881  | 10200000 | 0.120478 | 0.043965359 |
| chr12 | 10550001 | 10650000 | 693  | 560  | 10600000 | 0.235057 | 0.0004622   |
| chr12 | 10600001 | 10700000 | 879  | 732  | 10650000 | 0.191648 | 0.003396824 |
| chr12 | 10650001 | 10750000 | 979  | 808  | 10700000 | 0.204582 | 0.001940453 |
| chr12 | 10700001 | 10800000 | 1032 | 901  | 10750000 | 0.123472 | 0.04017559  |
| chr12 | 11150001 | 11250000 | 823  | 712  | 11200000 | 0.136643 | 0.026537718 |
| chr12 | 11600001 | 11700000 | 991  | 846  | 11650000 | 0.155856 | 0.013738522 |
| chr12 | 11700001 | 11800000 | 922  | 808  | 11750000 | 0.11804  | 0.047260935 |
| chr12 | 11850001 | 11950000 | 1127 | 962  | 11900000 | 0.156007 | 0.013664004 |
| chr12 | 12150001 | 12250000 | 831  | 920  | 12200000 | -0.21916 | 0.000958349 |
| chr12 | 12250001 | 12350000 | 1048 | 916  | 12300000 | 0.121847 | 0.042197577 |
| chr12 | 12300001 | 12400000 | 1032 | 896  | 12350000 | 0.131501 | 0.031312581 |
| chr12 | 13000001 | 13100000 | 966  | 828  | 13050000 | 0.150021 | 0.016892961 |
| chr12 | 14850001 | 14950000 | 921  | 793  | 14900000 | 0.143509 | 0.021128573 |
| chr12 | 14900001 | 15000000 | 1010 | 834  | 14950000 | 0.203864 | 0.002003209 |
| chr12 | 14950001 | 15050000 | 1012 | 886  | 1.50E+07 | 0.119459 | 0.045319369 |
| chr12 | 15950001 | 16050000 | 941  | 975  | 1.60E+07 | -0.12358 | 0.039722401 |
| chr12 | 16400001 | 16500000 | 1054 | 921  | 16450000 | 0.12223  | 0.041714153 |
| chr12 | 16450001 | 16550000 | 978  | 856  | 16500000 | 0.119852 | 0.04479329  |
| chr12 | 16650001 | 16750000 | 981  | 1041 | 16700000 | -0.15802 | 0.012507383 |
| chr12 | 16800001 | 16900000 | 1025 | 864  | 16850000 | 0.174149 | 0.006916378 |
| chr12 | 17000001 | 17100000 | 1089 | 954  | 17050000 | 0.118571 | 0.046526365 |
| chr12 | 17200001 | 17300000 | 950  | 821  | 17250000 | 0.138174 | 0.025240893 |
| chr12 | 17250001 | 17350000 | 964  | 785  | 17300000 | 0.223969 | 0.000793714 |
| chr12 | 17400001 | 17500000 | 996  | 852  | 17450000 | 0.152921 | 0.015255048 |
| chr12 | 17450001 | 17550000 | 1013 | 881  | 17500000 | 0.129048 | 0.033828783 |
| chr12 | 17500001 | 17600000 | 1018 | 843  | 17550000 | 0.199761 | 0.002398921 |
| chr12 | 17550001 | 17650000 | 968  | 843  | 17600000 | 0.127103 | 0.035942314 |
| chr12 | 17650001 | 17750000 | 1049 | 861  | 17700000 | 0.212558 | 0.001354022 |
| chr12 | 17700001 | 17800000 | 991  | 801  | 17750000 | 0.234711 | 0.00047021  |
| chr12 | 17850001 | 17950000 | 781  | 652  | 17900000 | 0.188079 | 0.003944015 |
| chr12 | 17900001 | 18000000 | 861  | 659  | 17950000 | 0.313363 | 5.55E-06    |
| chr12 | 17950001 | 18050000 | 891  | 736  | 1.80E+07 | 0.203348 | 0.002049504 |

|       |          |          |      |      |          |          |             |
|-------|----------|----------|------|------|----------|----------|-------------|
| chr12 | 18200001 | 18300000 | 995  | 827  | 18250000 | 0.194437 | 0.003017853 |
| chr12 | 18250001 | 18350000 | 960  | 780  | 18300000 | 0.227189 | 0.000679876 |
| chr12 | 18300001 | 18400000 | 923  | 791  | 18350000 | 0.150281 | 0.016739879 |
| chr12 | 18400001 | 18500000 | 1054 | 874  | 18450000 | 0.197798 | 0.002612326 |
| chr12 | 18450001 | 18550000 | 1087 | 917  | 18500000 | 0.172987 | 0.007237196 |
| chr12 | 19650001 | 19750000 | 920  | 789  | 19700000 | 0.149237 | 0.017360803 |
| chr12 | 20950001 | 21050000 | 965  | 830  | 2.10E+07 | 0.145046 | 0.020054844 |
| chr12 | 21250001 | 21350000 | 986  | 863  | 21300000 | 0.119855 | 0.044788736 |
| chr12 | 21400001 | 21500000 | 1035 | 908  | 21450000 | 0.116495 | 0.049449899 |
| chr12 | 21450001 | 21550000 | 1037 | 843  | 21500000 | 0.22644  | 0.000704918 |
| chr12 | 21500001 | 21600000 | 879  | 771  | 21550000 | 0.116761 | 0.049067691 |
| chr12 | 21750001 | 21850000 | 917  | 958  | 21800000 | -0.13548 | 0.027279936 |
| chr12 | 22100001 | 22200000 | 985  | 848  | 22150000 | 0.143688 | 0.021000971 |
| chr12 | 22150001 | 22250000 | 990  | 860  | 22200000 | 0.13072  | 0.03209604  |
| chr12 | 22200001 | 22300000 | 918  | 802  | 22250000 | 0.12252  | 0.041350593 |
| chr12 | 22300001 | 22400000 | 1004 | 876  | 22350000 | 0.124385 | 0.03907504  |
| chr12 | 22450001 | 22550000 | 960  | 830  | 22500000 | 0.137551 | 0.025761676 |
| chr12 | 22550001 | 22650000 | 791  | 680  | 22600000 | 0.145771 | 0.019564582 |
| chr12 | 22600001 | 22700000 | 1066 | 884  | 22650000 | 0.197717 | 0.002621434 |
| chr12 | 23700001 | 23800000 | 1067 | 915  | 23750000 | 0.149345 | 0.017295711 |
| chr12 | 23750001 | 23850000 | 1087 | 903  | 23800000 | 0.195182 | 0.002923351 |
| chr12 | 23950001 | 24050000 | 984  | 836  | 2.40E+07 | 0.162784 | 0.010666719 |
| chr12 | 24800001 | 24900000 | 1011 | 871  | 24850000 | 0.142667 | 0.02173702  |
| chr12 | 24900001 | 25000000 | 943  | 990  | 24950000 | -0.14254 | 0.021569154 |
| chr12 | 25300001 | 25400000 | 888  | 750  | 25350000 | 0.171297 | 0.007726886 |
| chr12 | 25350001 | 25450000 | 1059 | 858  | 25400000 | 0.231281 | 0.000556973 |
| chr12 | 25400001 | 25500000 | 1051 | 875  | 25450000 | 0.192036 | 0.003341633 |
| chr12 | 26400001 | 26500000 | 928  | 977  | 26450000 | -0.14661 | 0.018769975 |
| chr12 | 26800001 | 26900000 | 963  | 1000 | 26850000 | -0.12676 | 0.036007465 |
| chr12 | 26850001 | 26950000 | 917  | 946  | 26900000 | -0.11729 | 0.04797438  |
| chr12 | 27100001 | 27200000 | 876  | 906  | 27150000 | -0.12095 | 0.043017082 |
| chr12 | 27150001 | 27250000 | 754  | 815  | 27200000 | -0.18461 | 0.004441347 |
| chr12 | 27900001 | 28000000 | 942  | 999  | 27950000 | -0.15713 | 0.012919152 |
| chr12 | 27950001 | 28050000 | 940  | 1016 | 2.80E+07 | -0.18454 | 0.004453798 |
| chr12 | 28050001 | 28150000 | 1108 | 968  | 28100000 | 0.122507 | 0.041366814 |
| chr12 | 28100001 | 28200000 | 991  | 844  | 28150000 | 0.15927  | 0.012140038 |
| chr12 | 28300001 | 28400000 | 1061 | 918  | 28350000 | 0.136487 | 0.026673533 |
| chr12 | 28350001 | 28450000 | 1008 | 865  | 28400000 | 0.148352 | 0.017902289 |
| chr12 | 28550001 | 28650000 | 1025 | 868  | 28600000 | 0.167485 | 0.008940876 |
| chr12 | 28600001 | 28700000 | 893  | 776  | 28650000 | 0.130232 | 0.032594465 |
| chr12 | 28700001 | 28800000 | 1069 | 922  | 28750000 | 0.141051 | 0.022945934 |
| chr12 | 28800001 | 28900000 | 968  | 828  | 28850000 | 0.153005 | 0.015209735 |
| chr12 | 28850001 | 28950000 | 1036 | 875  | 28900000 | 0.171297 | 0.007726886 |
| chr12 | 29050001 | 29150000 | 1115 | 939  | 29100000 | 0.175475 | 0.006565857 |
| chr12 | 29200001 | 29300000 | 829  | 857  | 29250000 | -0.12029 | 0.04387476  |
| chr12 | 29400001 | 29500000 | 917  | 794  | 29450000 | 0.135411 | 0.027622493 |
| chr12 | 29600001 | 29700000 | 978  | 1009 | 29650000 | -0.11739 | 0.047831249 |

|       |          |          |      |      |          |          |             |
|-------|----------|----------|------|------|----------|----------|-------------|
| chr12 | 30400001 | 30500000 | 1015 | 879  | 30450000 | 0.135173 | 0.027836253 |
| chr12 | 30900001 | 31000000 | 913  | 998  | 30950000 | -0.2008  | 0.002223169 |
| chr12 | 30950001 | 31050000 | 899  | 1042 | 3.10E+07 | -0.28533 | 2.80E-05    |
| chr12 | 31000001 | 31100000 | 966  | 1023 | 31050000 | -0.15508 | 0.013913833 |
| chr12 | 31250001 | 31350000 | 131  | 139  | 31300000 | -0.15789 | 0.012565585 |
| chr12 | 31550001 | 31650000 | 934  | 755  | 31600000 | 0.234574 | 0.000473418 |
| chr12 | 31600001 | 31700000 | 930  | 815  | 31650000 | 0.118059 | 0.04723423  |
| chr12 | 31800001 | 31900000 | 871  | 756  | 31850000 | 0.131915 | 0.03090333  |
| chr12 | 32150001 | 32250000 | 818  | 696  | 32200000 | 0.160642 | 0.011545067 |
| chr12 | 32650001 | 32750000 | 951  | 827  | 32700000 | 0.129186 | 0.033683122 |
| chr12 | 32700001 | 32800000 | 990  | 844  | 32750000 | 0.157814 | 0.012800939 |
| chr12 | 33200001 | 33300000 | 882  | 739  | 33250000 | 0.182833 | 0.004892572 |
| chr12 | 33300001 | 33400000 | 808  | 838  | 33350000 | -0.12497 | 0.038067278 |
| chr12 | 33700001 | 33800000 | 1082 | 905  | 33750000 | 0.185339 | 0.004416508 |
| chr12 | 33750001 | 33850000 | 1073 | 861  | 33800000 | 0.245193 | 0.000276714 |
| chr12 | 33800001 | 33900000 | 1000 | 865  | 33850000 | 0.136856 | 0.026354106 |
| chr12 | 34050001 | 34150000 | 577  | 481  | 34100000 | 0.190163 | 0.003615614 |
| chr12 | 34200001 | 34300000 | 419  | 434  | 34250000 | -0.12312 | 0.04028723  |
| chr12 | 34350001 | 34450000 | 769  | 827  | 34400000 | -0.17728 | 0.005983366 |
| chr12 | 34500001 | 34600000 | 1002 | 1050 | 34550000 | -0.13988 | 0.023590254 |
| chr12 | 34550001 | 34650000 | 736  | 763  | 34600000 | -0.12435 | 0.038797    |
| chr12 | 34650001 | 34750000 | 812  | 668  | 34700000 | 0.20926  | 0.001573361 |
| chr12 | 34850001 | 34950000 | 76   | 64   | 34900000 | 0.175556 | 0.006544999 |
| chr12 | 37800001 | 37900000 | 71   | 51   | 37850000 | 0.40495  | 8.58E-09    |
| chr12 | 38950001 | 39050000 | 978  | 853  | 3.90E+07 | 0.124917 | 0.038444608 |
| chr12 | 39250001 | 39350000 | 998  | 873  | 39300000 | 0.120686 | 0.043692535 |
| chr12 | 39400001 | 39500000 | 1036 | 897  | 39450000 | 0.135472 | 0.027567598 |
| chr12 | 39500001 | 39600000 | 847  | 909  | 39550000 | -0.17429 | 0.006736861 |
| chr12 | 39700001 | 39800000 | 1060 | 917  | 39750000 | 0.136699 | 0.026489776 |
| chr12 | 39950001 | 40050000 | 970  | 829  | 4.00E+07 | 0.154241 | 0.014555854 |
| chr12 | 40000001 | 40100000 | 907  | 788  | 40050000 | 0.130535 | 0.032284055 |
| chr12 | 40150001 | 40250000 | 958  | 826  | 40200000 | 0.141512 | 0.02259547  |
| chr12 | 41100001 | 41200000 | 1052 | 913  | 41150000 | 0.132076 | 0.030744994 |
| chr12 | 41350001 | 41450000 | 1000 | 856  | 41400000 | 0.151946 | 0.015789785 |
| chr12 | 41400001 | 41500000 | 893  | 762  | 41450000 | 0.156497 | 0.013424879 |
| chr12 | 41600001 | 41700000 | 935  | 974  | 41650000 | -0.13133 | 0.031186319 |
| chr12 | 41850001 | 41950000 | 1099 | 897  | 41900000 | 0.22064  | 0.000929725 |
| chr12 | 41900001 | 42000000 | 1086 | 882  | 41950000 | 0.227802 | 0.000659986 |
| chr12 | 42550001 | 42650000 | 915  | 786  | 42600000 | 0.146871 | 0.018840931 |
| chr12 | 43700001 | 43800000 | 944  | 974  | 43750000 | -0.11751 | 0.04766911  |
| chr12 | 44050001 | 44150000 | 935  | 814  | 44100000 | 0.127566 | 0.035429645 |
| chr12 | 44450001 | 44550000 | 953  | 834  | 44500000 | 0.120057 | 0.044520611 |
| chr12 | 44900001 | 45000000 | 1026 | 873  | 44950000 | 0.160605 | 0.011560509 |
| chr12 | 45300001 | 45400000 | 900  | 780  | 45350000 | 0.134079 | 0.028836197 |
| chr12 | 45500001 | 45600000 | 977  | 846  | 45550000 | 0.135329 | 0.02769581  |
| chr12 | 45800001 | 45900000 | 1057 | 918  | 45850000 | 0.131038 | 0.031775432 |
| chr12 | 46200001 | 46300000 | 1050 | 908  | 46250000 | 0.137253 | 0.026014226 |

|       |          |          |      |      |          |          |             |
|-------|----------|----------|------|------|----------|----------|-------------|
| chr12 | 46250001 | 46350000 | 1042 | 892  | 46300000 | 0.151868 | 0.015833049 |
| chr12 | 48050001 | 48150000 | 1024 | 1056 | 48100000 | -0.11677 | 0.048720327 |
| chr12 | 48100001 | 48200000 | 1109 | 1292 | 48150000 | -0.29272 | 1.80E-05    |
| chr12 | 48150001 | 48250000 | 1065 | 1206 | 48200000 | -0.25175 | 0.000185537 |
| chr12 | 48250001 | 48350000 | 1088 | 1151 | 48300000 | -0.15358 | 0.014685216 |
| chr12 | 48300001 | 48400000 | 1070 | 1193 | 48350000 | -0.22936 | 0.000585117 |
| chr12 | 48900001 | 49000000 | 791  | 816  | 48950000 | -0.11726 | 0.048012556 |
| chr12 | 49150001 | 49250000 | 882  | 1006 | 49200000 | -0.26215 | 0.000105562 |
| chr12 | 49200001 | 49300000 | 877  | 948  | 49250000 | -0.18468 | 0.004427667 |
| chr12 | 49350001 | 49450000 | 1047 | 1099 | 49400000 | -0.1423  | 0.021745614 |
| chr12 | 49450001 | 49550000 | 851  | 881  | 49500000 | -0.12235 | 0.041231553 |
| chr12 | 49500001 | 49600000 | 758  | 793  | 49550000 | -0.13749 | 0.025531974 |
| chr12 | 49900001 | 50000000 | 1005 | 1146 | 49950000 | -0.26178 | 0.000107726 |
| chr12 | 49950001 | 50050000 | 1044 | 1171 | 5.00E+07 | -0.23799 | 0.000379727 |
| chr12 | 50150001 | 50250000 | 912  | 950  | 50200000 | -0.13127 | 0.031247765 |
| chr12 | 50300001 | 50400000 | 1048 | 1088 | 50350000 | -0.12641 | 0.036404016 |
| chr12 | 50350001 | 50450000 | 925  | 981  | 50400000 | -0.15717 | 0.01289933  |
| chr12 | 50400001 | 50500000 | 983  | 1046 | 50450000 | -0.16199 | 0.010799887 |
| chr12 | 50450001 | 50550000 | 972  | 1014 | 50500000 | -0.1334  | 0.029178952 |
| chr12 | 50600001 | 50700000 | 873  | 754  | 50650000 | 0.139045 | 0.024526103 |
| chr12 | 50650001 | 50750000 | 835  | 715  | 50700000 | 0.151461 | 0.016061363 |
| chr12 | 50950001 | 51050000 | 961  | 800  | 5.10E+07 | 0.192165 | 0.003323518 |
| chr12 | 51000001 | 51100000 | 1007 | 879  | 51050000 | 0.123757 | 0.039829608 |
| chr12 | 51100001 | 51200000 | 839  | 877  | 51150000 | -0.13628 | 0.026573913 |
| chr12 | 52150001 | 52250000 | 976  | 1069 | 52200000 | -0.20368 | 0.001955708 |
| chr12 | 52200001 | 52300000 | 1002 | 1129 | 52250000 | -0.24453 | 0.000271238 |
| chr12 | 52250001 | 52350000 | 961  | 1097 | 52300000 | -0.26333 | 9.89E-05    |
| chr12 | 52400001 | 52500000 | 970  | 1099 | 52450000 | -0.25251 | 0.000178181 |
| chr12 | 52450001 | 52550000 | 883  | 960  | 52500000 | -0.19299 | 0.00312164  |
| chr12 | 52500001 | 52600000 | 1028 | 1077 | 52550000 | -0.13955 | 0.023850469 |
| chr12 | 52550001 | 52650000 | 1123 | 1244 | 52600000 | -0.22    | 0.000920688 |
| chr12 | 52600001 | 52700000 | 967  | 1097 | 52650000 | -0.25435 | 0.000161443 |
| chr12 | 52700001 | 52800000 | 1145 | 1197 | 52750000 | -0.13645 | 0.026426674 |
| chr12 | 52750001 | 52850000 | 1057 | 1173 | 52800000 | -0.2226  | 0.00081301  |
| chr12 | 52900001 | 53000000 | 1120 | 1162 | 52950000 | -0.12548 | 0.037465853 |
| chr12 | 52950001 | 53050000 | 1078 | 1149 | 5.30E+07 | -0.16439 | 0.009869687 |
| chr12 | 53400001 | 53500000 | 884  | 986  | 53450000 | -0.22991 | 0.000569226 |
| chr12 | 53450001 | 53550000 | 832  | 941  | 53500000 | -0.24998 | 0.00020378  |
| chr12 | 53550001 | 53650000 | 1008 | 1062 | 53600000 | -0.14766 | 0.018096384 |
| chr12 | 53600001 | 53700000 | 900  | 929  | 53650000 | -0.11813 | 0.046805194 |
| chr12 | 54100001 | 54200000 | 1044 | 1126 | 54150000 | -0.18146 | 0.005054051 |
| chr12 | 54150001 | 54250000 | 1035 | 1080 | 54200000 | -0.13377 | 0.028831366 |
| chr12 | 54250001 | 54350000 | 982  | 1050 | 54300000 | -0.16897 | 0.008291107 |
| chr12 | 54300001 | 54400000 | 1066 | 1164 | 54350000 | -0.19926 | 0.002379366 |
| chr12 | 54500001 | 54600000 | 860  | 975  | 54550000 | -0.25344 | 0.000169525 |
| chr12 | 54550001 | 54650000 | 973  | 1030 | 54600000 | -0.1545  | 0.01420669  |
| chr12 | 54700001 | 54800000 | 947  | 1001 | 54750000 | -0.15238 | 0.015329819 |

|       |          |          |      |      |          |          |             |
|-------|----------|----------|------|------|----------|----------|-------------|
| chr12 | 54750001 | 54850000 | 987  | 1067 | 54800000 | -0.18481 | 0.004404313 |
| chr12 | 54800001 | 54900000 | 893  | 929  | 54850000 | -0.12939 | 0.033163166 |
| chr12 | 54900001 | 55000000 | 1121 | 1171 | 54950000 | -0.13533 | 0.027412911 |
| chr12 | 55600001 | 55700000 | 932  | 816  | 55650000 | 0.119389 | 0.045413442 |
| chr12 | 55650001 | 55750000 | 894  | 752  | 55700000 | 0.17717  | 0.006140656 |
| chr12 | 55700001 | 55800000 | 912  | 760  | 55750000 | 0.190663 | 0.003540577 |
| chr12 | 55750001 | 55850000 | 986  | 802  | 55800000 | 0.225614 | 0.000733523 |
| chr12 | 55800001 | 55900000 | 855  | 715  | 55850000 | 0.185609 | 0.004367721 |
| chr12 | 55850001 | 55950000 | 724  | 633  | 55900000 | 0.121412 | 0.042752758 |
| chr12 | 56350001 | 56450000 | 887  | 967  | 56400000 | -0.19695 | 0.002631218 |
| chr12 | 56400001 | 56500000 | 873  | 908  | 56450000 | -0.12908 | 0.033486606 |
| chr12 | 56550001 | 56650000 | 906  | 940  | 56600000 | -0.12552 | 0.037421476 |
| chr12 | 56950001 | 57050000 | 888  | 763  | 5.70E+07 | 0.146505 | 0.01907912  |
| chr12 | 57000001 | 57100000 | 812  | 683  | 57050000 | 0.177222 | 0.006128017 |
| chr12 | 57350001 | 57450000 | 876  | 913  | 57400000 | -0.13206 | 0.030468484 |
| chr12 | 57500001 | 57600000 | 1128 | 1191 | 57550000 | -0.15078 | 0.016223896 |
| chr12 | 57550001 | 57650000 | 1103 | 1299 | 57600000 | -0.30834 | 6.85E-06    |
| chr12 | 57600001 | 57700000 | 1043 | 1160 | 57650000 | -0.22576 | 0.000697843 |
| chr12 | 57900001 | 58000000 | 980  | 1071 | 57950000 | -0.20048 | 0.002254823 |
| chr12 | 57950001 | 58050000 | 939  | 1003 | 5.80E+07 | -0.1675  | 0.00877239  |
| chr12 | 58150001 | 58250000 | 958  | 1009 | 58200000 | -0.1472  | 0.018387365 |
| chr12 | 59050001 | 59150000 | 1028 | 848  | 59100000 | 0.205332 | 0.001876736 |
| chr12 | 59100001 | 59200000 | 985  | 860  | 59150000 | 0.123415 | 0.040245036 |
| chr12 | 59650001 | 59750000 | 919  | 799  | 59700000 | 0.129498 | 0.033355831 |
| chr12 | 59700001 | 59800000 | 958  | 791  | 59750000 | 0.203976 | 0.001993297 |
| chr12 | 59750001 | 59850000 | 1035 | 849  | 59800000 | 0.213423 | 0.001301344 |
| chr12 | 59800001 | 59900000 | 981  | 826  | 59850000 | 0.17574  | 0.006497799 |
| chr12 | 60100001 | 60200000 | 888  | 766  | 60150000 | 0.140844 | 0.023105604 |
| chr12 | 60700001 | 60800000 | 1013 | 886  | 60750000 | 0.120884 | 0.043435369 |
| chr12 | 60750001 | 60850000 | 986  | 855  | 60800000 | 0.133291 | 0.029574691 |
| chr12 | 60800001 | 60900000 | 1069 | 844  | 60850000 | 0.268575 | 7.92E-05    |
| chr12 | 60850001 | 60950000 | 1113 | 912  | 60900000 | 0.214976 | 0.001211406 |
| chr12 | 60950001 | 61050000 | 992  | 860  | 6.10E+07 | 0.133632 | 0.02925378  |
| chr12 | 61150001 | 61250000 | 837  | 720  | 61200000 | 0.144859 | 0.020182845 |
| chr12 | 61200001 | 61300000 | 962  | 794  | 61250000 | 0.204526 | 0.001945258 |
| chr12 | 61250001 | 61350000 | 1040 | 842  | 61300000 | 0.23232  | 0.000529253 |
| chr12 | 61300001 | 61400000 | 981  | 788  | 61350000 | 0.243686 | 0.000298988 |
| chr12 | 61350001 | 61450000 | 939  | 818  | 61400000 | 0.126653 | 0.036446364 |
| chr12 | 61650001 | 61750000 | 912  | 762  | 61700000 | 0.186871 | 0.004146397 |
| chr12 | 61700001 | 61800000 | 991  | 849  | 61750000 | 0.150749 | 0.016468143 |
| chr12 | 62150001 | 62250000 | 1056 | 918  | 62200000 | 0.129672 | 0.033173632 |
| chr12 | 62300001 | 62400000 | 984  | 810  | 62350000 | 0.208365 | 0.001638269 |
| chr12 | 62350001 | 62450000 | 1074 | 931  | 62400000 | 0.133769 | 0.029124953 |
| chr12 | 62650001 | 62750000 | 1040 | 881  | 62700000 | 0.166998 | 0.009107582 |
| chr12 | 62700001 | 62800000 | 968  | 830  | 62750000 | 0.149524 | 0.017188146 |
| chr12 | 62900001 | 63000000 | 963  | 826  | 62950000 | 0.149022 | 0.017490772 |
| chr12 | 62950001 | 63050000 | 1067 | 872  | 6.30E+07 | 0.218788 | 0.001014361 |



|       |          |          |      |      |          |          |             |
|-------|----------|----------|------|------|----------|----------|-------------|
| chr12 | 63900001 | 64000000 | 334  | 364  | 63950000 | -0.19646 | 0.00268802  |
| chr12 | 64000001 | 64100000 | 148  | 116  | 64050000 | 0.279101 | 4.37E-05    |
| chr12 | 64050001 | 64150000 | 249  | 192  | 64100000 | 0.302668 | 1.08E-05    |
| chr12 | 64400001 | 64500000 | 1053 | 879  | 64450000 | 0.188199 | 0.003924435 |
| chr12 | 64450001 | 64550000 | 940  | 816  | 64500000 | 0.13172  | 0.031095347 |
| chr12 | 64550001 | 64650000 | 900  | 775  | 64600000 | 0.143357 | 0.021237053 |
| chr12 | 64600001 | 64700000 | 897  | 749  | 64650000 | 0.18777  | 0.003994817 |
| chr12 | 64650001 | 64750000 | 833  | 674  | 64700000 | 0.233196 | 0.000506856 |
| chr12 | 64700001 | 64800000 | 807  | 691  | 64750000 | 0.151511 | 0.016033139 |
| chr12 | 65100001 | 65200000 | 848  | 922  | 65150000 | -0.19307 | 0.003110766 |
| chr12 | 65150001 | 65250000 | 837  | 891  | 65200000 | -0.16257 | 0.010569222 |
| chr12 | 65700001 | 65800000 | 950  | 809  | 65750000 | 0.159416 | 0.012075566 |
| chr12 | 65800001 | 65900000 | 1088 | 934  | 65850000 | 0.147812 | 0.018239439 |
| chr12 | 65850001 | 65950000 | 1054 | 924  | 65900000 | 0.117538 | 0.047962588 |
| chr12 | 66000001 | 66100000 | 1013 | 1089 | 66050000 | -0.17674 | 0.006112365 |
| chr12 | 66650001 | 66750000 | 1045 | 872  | 66700000 | 0.188731 | 0.00383844  |
| chr12 | 66700001 | 66800000 | 1017 | 887  | 66750000 | 0.124942 | 0.038415265 |
| chr12 | 67550001 | 67650000 | 969  | 844  | 67600000 | 0.126882 | 0.036188801 |
| chr12 | 67600001 | 67700000 | 964  | 841  | 67650000 | 0.124556 | 0.03887175  |
| chr12 | 68250001 | 68350000 | 947  | 821  | 68300000 | 0.13361  | 0.029273745 |
| chr12 | 68700001 | 68800000 | 1021 | 1059 | 68750000 | -0.12509 | 0.03792124  |
| chr12 | 68750001 | 68850000 | 989  | 1024 | 68800000 | -0.12255 | 0.040993897 |
| chr12 | 68900001 | 69000000 | 931  | 734  | 68950000 | 0.270629 | 7.06E-05    |
| chr12 | 68950001 | 69050000 | 943  | 809  | 6.90E+07 | 0.148746 | 0.017659164 |
| chr12 | 69050001 | 69150000 | 929  | 811  | 69100000 | 0.123605 | 0.040013968 |
| chr12 | 69150001 | 69250000 | 815  | 714  | 69200000 | 0.118504 | 0.046618206 |
| chr12 | 69200001 | 69300000 | 937  | 758  | 69250000 | 0.233479 | 0.000499808 |
| chr12 | 69800001 | 69900000 | 1018 | 887  | 69850000 | 0.12636  | 0.036777322 |
| chr12 | 69850001 | 69950000 | 971  | 821  | 69900000 | 0.169717 | 0.00821117  |
| chr12 | 70050001 | 70150000 | 993  | 862  | 70100000 | 0.131734 | 0.031081279 |
| chr12 | 70100001 | 70200000 | 945  | 823  | 70150000 | 0.12705  | 0.036000829 |
| chr12 | 70500001 | 70600000 | 927  | 809  | 70550000 | 0.124058 | 0.039466377 |
| chr12 | 71050001 | 71150000 | 1067 | 923  | 71100000 | 0.136786 | 0.026414687 |
| chr12 | 71350001 | 71450000 | 1038 | 899  | 71400000 | 0.135042 | 0.027954676 |
| chr12 | 71450001 | 71550000 | 957  | 815  | 71500000 | 0.159347 | 0.012106026 |
| chr12 | 72000001 | 72100000 | 1042 | 909  | 72050000 | 0.124631 | 0.038781916 |
| chr12 | 72050001 | 72150000 | 1015 | 848  | 72100000 | 0.186972 | 0.004129168 |
| chr12 | 72100001 | 72200000 | 1001 | 869  | 72150000 | 0.131642 | 0.031172194 |
| chr12 | 72850001 | 72950000 | 992  | 864  | 72900000 | 0.126937 | 0.036127101 |
| chr12 | 72900001 | 73000000 | 964  | 829  | 72950000 | 0.145289 | 0.019889149 |
| chr12 | 72950001 | 73050000 | 955  | 816  | 7.30E+07 | 0.15456  | 0.01439117  |
| chr12 | 73200001 | 73300000 | 950  | 721  | 73250000 | 0.325556 | 2.54E-06    |
| chr12 | 73250001 | 73350000 | 1069 | 840  | 73300000 | 0.275429 | 5.39E-05    |
| chr12 | 73300001 | 73400000 | 976  | 852  | 73350000 | 0.123656 | 0.039951962 |
| chr12 | 73450001 | 73550000 | 998  | 864  | 73500000 | 0.135637 | 0.027421041 |
| chr12 | 73500001 | 73600000 | 936  | 761  | 73550000 | 0.22624  | 0.000711723 |
| chr12 | 73550001 | 73650000 | 924  | 807  | 73600000 | 0.122952 | 0.04081368  |

|       |          |          |      |     |          |          |             |
|-------|----------|----------|------|-----|----------|----------|-------------|
| chr12 | 73600001 | 73700000 | 937  | 815 | 73650000 | 0.128877 | 0.034010589 |
| chr12 | 73700001 | 73800000 | 933  | 804 | 73750000 | 0.14231  | 0.021999319 |
| chr12 | 73750001 | 73850000 | 905  | 761 | 73800000 | 0.17765  | 0.006025013 |
| chr12 | 73800001 | 73900000 | 884  | 769 | 73850000 | 0.128691 | 0.034209187 |
| chr12 | 73850001 | 73950000 | 929  | 796 | 73900000 | 0.150538 | 0.016589917 |
| chr12 | 73950001 | 74050000 | 965  | 845 | 7.40E+07 | 0.119206 | 0.045660803 |
| chr12 | 74000001 | 74100000 | 971  | 838 | 74050000 | 0.140149 | 0.02364557  |
| chr12 | 74050001 | 74150000 | 944  | 821 | 74100000 | 0.129033 | 0.033845323 |
| chr12 | 74100001 | 74200000 | 972  | 815 | 74150000 | 0.181784 | 0.005104876 |
| chr12 | 74150001 | 74250000 | 981  | 848 | 74200000 | 0.137817 | 0.025538113 |
| chr12 | 74200001 | 74300000 | 999  | 858 | 74250000 | 0.147135 | 0.018670231 |
| chr12 | 74350001 | 74450000 | 937  | 795 | 74400000 | 0.164722 | 0.009922572 |
| chr12 | 74400001 | 74500000 | 969  | 823 | 74450000 | 0.163232 | 0.010490231 |
| chr12 | 74450001 | 74550000 | 971  | 831 | 74500000 | 0.152251 | 0.015620515 |
| chr12 | 74550001 | 74650000 | 986  | 861 | 74600000 | 0.123203 | 0.040505471 |
| chr12 | 75000001 | 75100000 | 959  | 797 | 75050000 | 0.194579 | 0.00299964  |
| chr12 | 75050001 | 75150000 | 957  | 817 | 75100000 | 0.155811 | 0.013760526 |
| chr12 | 75200001 | 75300000 | 1002 | 864 | 75250000 | 0.141408 | 0.022674633 |
| chr12 | 75250001 | 75350000 | 993  | 822 | 75300000 | 0.200284 | 0.002344881 |
| chr12 | 75300001 | 75400000 | 999  | 834 | 75350000 | 0.188066 | 0.003946193 |
| chr12 | 75400001 | 75500000 | 1041 | 902 | 75450000 | 0.134399 | 0.028540731 |
| chr12 | 75550001 | 75650000 | 1056 | 910 | 75600000 | 0.1423   | 0.022006854 |
| chr12 | 75650001 | 75750000 | 1097 | 935 | 75700000 | 0.158153 | 0.012644056 |
| chr12 | 75700001 | 75800000 | 1017 | 874 | 75750000 | 0.146243 | 0.019251372 |
| chr12 | 76000001 | 76100000 | 970  | 848 | 76050000 | 0.121549 | 0.042578193 |
| chr12 | 76400001 | 76500000 | 1022 | 893 | 76450000 | 0.122291 | 0.041637105 |
| chr12 | 76450001 | 76550000 | 928  | 794 | 76500000 | 0.152614 | 0.015421445 |
| chr12 | 76500001 | 76600000 | 956  | 832 | 76550000 | 0.128055 | 0.03489435  |
| chr12 | 76550001 | 76650000 | 1008 | 869 | 76600000 | 0.141696 | 0.022457    |
| chr12 | 76600001 | 76700000 | 1024 | 879 | 76650000 | 0.147909 | 0.01817871  |
| chr12 | 76650001 | 76750000 | 991  | 847 | 76700000 | 0.154151 | 0.014602389 |
| chr12 | 76700001 | 76800000 | 930  | 769 | 76750000 | 0.201875 | 0.002186936 |
| chr12 | 76750001 | 76850000 | 987  | 838 | 76800000 | 0.163728 | 0.010298335 |
| chr12 | 76800001 | 76900000 | 1047 | 911 | 76850000 | 0.128367 | 0.034557318 |
| chr12 | 77450001 | 77550000 | 905  | 941 | 77500000 | -0.12865 | 0.033946805 |
| chr12 | 78100001 | 78200000 | 989  | 856 | 78150000 | 0.135988 | 0.027110105 |
| chr12 | 78300001 | 78400000 | 998  | 852 | 78350000 | 0.155815 | 0.013758777 |
| chr12 | 78450001 | 78550000 | 1031 | 902 | 78500000 | 0.120473 | 0.043971613 |
| chr12 | 78500001 | 78600000 | 1142 | 968 | 78550000 | 0.166112 | 0.009417621 |
| chr12 | 78650001 | 78750000 | 1066 | 930 | 78700000 | 0.124533 | 0.038898507 |
| chr12 | 78700001 | 78800000 | 1081 | 927 | 78750000 | 0.149354 | 0.017290444 |
| chr12 | 78750001 | 78850000 | 1066 | 887 | 78800000 | 0.19283  | 0.003231312 |
| chr12 | 78800001 | 78900000 | 1045 | 909 | 78850000 | 0.128779 | 0.034115248 |
| chr12 | 78850001 | 78950000 | 950  | 830 | 78900000 | 0.122444 | 0.041445259 |
| chr12 | 78900001 | 79000000 | 986  | 860 | 78950000 | 0.124879 | 0.038489032 |
| chr12 | 79050001 | 79150000 | 1028 | 862 | 79100000 | 0.181709 | 0.005120538 |
| chr12 | 79100001 | 79200000 | 1048 | 857 | 79150000 | 0.2179   | 0.00105745  |

|       |          |          |      |      |          |          |             |
|-------|----------|----------|------|------|----------|----------|-------------|
| chr12 | 79150001 | 79250000 | 1037 | 860  | 79200000 | 0.197636 | 0.002630721 |
| chr12 | 79200001 | 79300000 | 1044 | 858  | 79250000 | 0.2107   | 0.001473836 |
| chr12 | 79250001 | 79350000 | 1087 | 842  | 79300000 | 0.296088 | 1.61E-05    |
| chr12 | 79300001 | 79400000 | 1100 | 910  | 79350000 | 0.201193 | 0.002253387 |
| chr12 | 79350001 | 79450000 | 1002 | 837  | 79400000 | 0.187211 | 0.004088475 |
| chr12 | 79400001 | 79500000 | 1005 | 879  | 79450000 | 0.120889 | 0.043429053 |
| chr12 | 79500001 | 79600000 | 1043 | 889  | 79550000 | 0.158112 | 0.012663094 |
| chr12 | 79550001 | 79650000 | 1045 | 916  | 79600000 | 0.117712 | 0.047719068 |
| chr12 | 79600001 | 79700000 | 1109 | 959  | 79650000 | 0.137285 | 0.02598741  |
| chr12 | 79650001 | 79750000 | 1047 | 914  | 79700000 | 0.123624 | 0.039991252 |
| chr12 | 79800001 | 79900000 | 969  | 1026 | 79850000 | -0.15483 | 0.014039201 |
| chr12 | 80150001 | 80250000 | 1032 | 892  | 80200000 | 0.137956 | 0.025422283 |
| chr12 | 80400001 | 80500000 | 1031 | 887  | 80450000 | 0.144667 | 0.02031534  |
| chr12 | 80650001 | 80750000 | 974  | 826  | 80700000 | 0.165408 | 0.009670459 |
| chr12 | 80700001 | 80800000 | 971  | 812  | 80750000 | 0.18562  | 0.004365856 |
| chr12 | 80750001 | 80850000 | 955  | 809  | 80800000 | 0.166989 | 0.009110539 |
| chr12 | 80800001 | 80900000 | 865  | 743  | 80850000 | 0.146966 | 0.018779174 |
| chr12 | 80850001 | 80950000 | 871  | 764  | 80900000 | 0.116728 | 0.049113912 |
| chr12 | 81000001 | 81100000 | 1109 | 920  | 81050000 | 0.197182 | 0.002682755 |
| chr12 | 81300001 | 81400000 | 1024 | 892  | 81350000 | 0.126728 | 0.036361091 |
| chr12 | 81350001 | 81450000 | 1062 | 856  | 81400000 | 0.238729 | 0.000384594 |
| chr12 | 81400001 | 81500000 | 938  | 810  | 81450000 | 0.139294 | 0.024325208 |
| chr12 | 81600001 | 81700000 | 1056 | 874  | 81650000 | 0.200533 | 0.002319476 |
| chr12 | 81650001 | 81750000 | 1058 | 843  | 81700000 | 0.255363 | 0.000162449 |
| chr12 | 81750001 | 81850000 | 1038 | 899  | 81800000 | 0.135042 | 0.027954676 |
| chr12 | 81800001 | 81900000 | 962  | 828  | 81850000 | 0.144034 | 0.020755939 |
| chr12 | 81850001 | 81950000 | 1008 | 884  | 81900000 | 0.117006 | 0.04871733  |
| chr12 | 82200001 | 82300000 | 960  | 830  | 82250000 | 0.137551 | 0.025761676 |
| chr12 | 82250001 | 82350000 | 920  | 807  | 82300000 | 0.116693 | 0.049164    |
| chr12 | 82300001 | 82400000 | 936  | 821  | 82350000 | 0.116755 | 0.04907629  |
| chr12 | 82650001 | 82750000 | 972  | 831  | 82700000 | 0.153736 | 0.014819842 |
| chr12 | 83000001 | 83100000 | 980  | 852  | 83050000 | 0.129557 | 0.033294148 |
| chr12 | 83250001 | 83350000 | 1016 | 887  | 83300000 | 0.123523 | 0.040114113 |
| chr12 | 83650001 | 83750000 | 908  | 943  | 83700000 | -0.12694 | 0.035813926 |
| chr12 | 83750001 | 83850000 | 964  | 814  | 83800000 | 0.171633 | 0.007627429 |
| chr12 | 83800001 | 83900000 | 958  | 830  | 83850000 | 0.134543 | 0.028408913 |
| chr12 | 84050001 | 84150000 | 804  | 693  | 84100000 | 0.141968 | 0.02225283  |
| chr12 | 84550001 | 84650000 | 999  | 846  | 84600000 | 0.167455 | 0.008951042 |
| chr12 | 84600001 | 84700000 | 1023 | 881  | 84650000 | 0.14322  | 0.021335111 |
| chr12 | 84650001 | 84750000 | 1021 | 881  | 84700000 | 0.140397 | 0.023451554 |
| chr12 | 84700001 | 84800000 | 987  | 839  | 84750000 | 0.162008 | 0.010978002 |
| chr12 | 84850001 | 84950000 | 1098 | 928  | 84900000 | 0.17031  | 0.008026586 |
| chr12 | 85000001 | 85100000 | 1021 | 849  | 85050000 | 0.193775 | 0.003104256 |
| chr12 | 85050001 | 85150000 | 1023 | 836  | 85100000 | 0.21886  | 0.001010981 |
| chr12 | 85200001 | 85300000 | 1047 | 901  | 85250000 | 0.144291 | 0.020576343 |
| chr12 | 85250001 | 85350000 | 1055 | 889  | 85300000 | 0.174616 | 0.006791082 |
| chr12 | 85300001 | 85400000 | 1066 | 895  | 85350000 | 0.179876 | 0.005512696 |

|       |          |          |      |     |          |          |             |
|-------|----------|----------|------|-----|----------|----------|-------------|
| chr12 | 85350001 | 85450000 | 1107 | 889 | 85400000 | 0.244028 | 0.000293787 |
| chr12 | 85400001 | 85500000 | 1083 | 894 | 85450000 | 0.204315 | 0.001963597 |
| chr12 | 85500001 | 85600000 | 929  | 808 | 85550000 | 0.128952 | 0.0339316   |
| chr12 | 85550001 | 85650000 | 918  | 794 | 85600000 | 0.136983 | 0.026244863 |
| chr12 | 85600001 | 85700000 | 1016 | 849 | 85650000 | 0.186692 | 0.004177153 |
| chr12 | 85650001 | 85750000 | 1009 | 883 | 85700000 | 0.120069 | 0.044504702 |
| chr12 | 85900001 | 86000000 | 1058 | 924 | 85950000 | 0.123003 | 0.040751088 |
| chr12 | 85950001 | 86050000 | 1033 | 901 | 8.60E+07 | 0.124869 | 0.03850051  |
| chr12 | 86100001 | 86200000 | 998  | 826 | 86150000 | 0.200526 | 0.002320147 |
| chr12 | 86150001 | 86250000 | 1026 | 814 | 86200000 | 0.261558 | 0.000116416 |
| chr12 | 86200001 | 86300000 | 1003 | 873 | 86250000 | 0.127896 | 0.035067529 |
| chr12 | 86250001 | 86350000 | 978  | 826 | 86300000 | 0.171321 | 0.007719847 |
| chr12 | 86400001 | 86500000 | 873  | 754 | 86450000 | 0.139045 | 0.024526103 |
| chr12 | 86550001 | 86650000 | 1109 | 907 | 86600000 | 0.217713 | 0.001066716 |
| chr12 | 86600001 | 86700000 | 1113 | 927 | 86650000 | 0.191441 | 0.003426611 |
| chr12 | 86650001 | 86750000 | 1037 | 899 | 86700000 | 0.133651 | 0.029235558 |
| chr12 | 86850001 | 86950000 | 977  | 825 | 86900000 | 0.171593 | 0.007639208 |
| chr12 | 86900001 | 87000000 | 984  | 828 | 86950000 | 0.176656 | 0.006267049 |
| chr12 | 86950001 | 87050000 | 938  | 813 | 8.70E+07 | 0.133961 | 0.028946129 |
| chr12 | 87050001 | 87150000 | 1027 | 896 | 87100000 | 0.124494 | 0.038945186 |
| chr12 | 87100001 | 87200000 | 1032 | 829 | 87150000 | 0.243627 | 0.000299886 |
| chr12 | 87200001 | 87300000 | 941  | 815 | 87250000 | 0.135023 | 0.027971639 |
| chr12 | 87250001 | 87350000 | 912  | 790 | 87300000 | 0.134809 | 0.028165289 |
| chr12 | 87450001 | 87550000 | 915  | 790 | 87500000 | 0.139547 | 0.024122353 |
| chr12 | 87500001 | 87600000 | 950  | 831 | 87550000 | 0.120707 | 0.043665283 |
| chr12 | 87750001 | 87850000 | 892  | 731 | 87800000 | 0.214801 | 0.001221275 |
| chr12 | 87800001 | 87900000 | 944  | 779 | 87850000 | 0.204792 | 0.001922432 |
| chr12 | 88000001 | 88100000 | 919  | 789 | 88050000 | 0.147668 | 0.018330683 |
| chr12 | 88050001 | 88150000 | 891  | 734 | 88100000 | 0.207274 | 0.001720681 |
| chr12 | 88200001 | 88300000 | 1067 | 837 | 88250000 | 0.277889 | 4.69E-05    |
| chr12 | 88250001 | 88350000 | 903  | 717 | 88300000 | 0.260381 | 0.000124088 |
| chr12 | 88400001 | 88500000 | 1024 | 882 | 88450000 | 0.142993 | 0.021499116 |
| chr12 | 88450001 | 88550000 | 1031 | 900 | 88500000 | 0.123676 | 0.039928038 |
| chr12 | 88550001 | 88650000 | 981  | 829 | 88600000 | 0.170509 | 0.007965182 |
| chr12 | 88600001 | 88700000 | 1014 | 868 | 88650000 | 0.151919 | 0.015804593 |
| chr12 | 88750001 | 88850000 | 977  | 857 | 88800000 | 0.116692 | 0.049166628 |
| chr12 | 88900001 | 89000000 | 1056 | 890 | 88950000 | 0.174361 | 0.006859271 |
| chr12 | 89000001 | 89100000 | 973  | 825 | 89050000 | 0.165674 | 0.009574305 |
| chr12 | 89050001 | 89150000 | 959  | 752 | 89100000 | 0.278426 | 4.54E-05    |
| chr12 | 89100001 | 89200000 | 1028 | 864 | 89150000 | 0.178365 | 0.005855891 |
| chr12 | 89150001 | 89250000 | 988  | 862 | 89200000 | 0.124451 | 0.038995599 |
| chr12 | 89200001 | 89300000 | 1019 | 859 | 89250000 | 0.174052 | 0.006942572 |
| chr12 | 89750001 | 89850000 | 879  | 936 | 89800000 | -0.16302 | 0.010393666 |
| chr12 | 89800001 | 89900000 | 868  | 924 | 89850000 | -0.16257 | 0.010569222 |
| chr12 | 90150001 | 90250000 | 957  | 814 | 90200000 | 0.161118 | 0.011344347 |
| chr12 | 90250001 | 90350000 | 1059 | 893 | 90300000 | 0.173599 | 0.007066623 |
| chr12 | 90650001 | 90750000 | 1095 | 869 | 90700000 | 0.261131 | 0.000119147 |

|       |          |          |      |     |           |          |              |
|-------|----------|----------|------|-----|-----------|----------|--------------|
| chr12 | 90700001 | 90800000 | 1178 | 880 | 90750000  | 0.348392 | 5.49E-07     |
| chr12 | 90750001 | 90850000 | 1094 | 913 | 90800000  | 0.188554 | 0.003866821  |
| chr12 | 90850001 | 90950000 | 970  | 799 | 90900000  | 0.207417 | 0.001709601  |
| chr12 | 90900001 | 91000000 | 984  | 772 | 90950000  | 0.277686 | 4.74E-05     |
| chr12 | 90950001 | 91050000 | 1094 | 897 | 9.10E+07  | 0.214061 | 0.001263661  |
| chr12 | 91100001 | 91200000 | 957  | 835 | 91150000  | 0.124371 | 0.039091459  |
| chr12 | 91450001 | 91550000 | 1013 | 852 | 91500000  | 0.177337 | 0.00610021   |
| chr12 | 91500001 | 91600000 | 1077 | 846 | 91550000  | 0.275917 | 5.24E-05     |
| chr12 | 91550001 | 91650000 | 1043 | 821 | 91600000  | 0.272913 | 6.21E-05     |
| chr12 | 91600001 | 91700000 | 1002 | 870 | 91650000  | 0.131423 | 0.031389294  |
| chr12 | 91950001 | 92050000 | 1021 | 863 | 9.20E+07  | 0.170179 | 0.008067077  |
| chr12 | 92100001 | 92200000 | 1014 | 888 | 92150000  | 0.119054 | 0.045866222  |
| chr12 | 93100001 | 93200000 | 967  | 846 | 93150000  | 0.120486 | 0.043954248  |
| chr12 | 93150001 | 93250000 | 949  | 830 | 93200000  | 0.120925 | 0.043381878  |
| chr12 | 93200001 | 93300000 | 927  | 789 | 93250000  | 0.160172 | 0.011745819  |
| chr12 | 93250001 | 93350000 | 852  | 700 | 93300000  | 0.211127 | 0.001445505  |
| chr12 | 93650001 | 93750000 | 917  | 775 | 93700000  | 0.170354 | 0.008012996  |
| chr12 | 93700001 | 93800000 | 871  | 748 | 93750000  | 0.147263 | 0.018588502  |
| chr12 | 93950001 | 94050000 | 1006 | 850 | 9.40E+07  | 0.170724 | 0.007899678  |
| chr12 | 94350001 | 94450000 | 1001 | 875 | 94400000  | 0.121715 | 0.042365622  |
| chr12 | 94450001 | 94550000 | 913  | 991 | 94500000  | -0.19064 | 0.003450335  |
| chr12 | 95450001 | 95550000 | 909  | 797 | 95500000  | 0.117329 | 0.048258315  |
| chr12 | 95500001 | 95600000 | 903  | 753 | 95550000  | 0.189704 | 0.00368565   |
| chr12 | 95550001 | 95650000 | 944  | 792 | 95600000  | 0.180915 | 0.005287289  |
| chr12 | 95600001 | 95700000 | 992  | 847 | 95650000  | 0.155606 | 0.013862027  |
| chr12 | 95650001 | 95750000 | 973  | 804 | 95700000  | 0.202873 | 0.002092985  |
| chr12 | 95800001 | 95900000 | 818  | 849 | 95850000  | -0.12604 | 0.036831145  |
| chr12 | 95850001 | 95950000 | 846  | 886 | 95900000  | -0.13902 | 0.024274115  |
| chr12 | 97150001 | 97250000 | 1046 | 912 | 97200000  | 0.125405 | 0.03787344   |
| chr12 | 97700001 | 97800000 | 921  | 954 | 97750000  | -0.12316 | 0.040234083  |
| chr12 | 98100001 | 98200000 | 896  | 777 | 98150000  | 0.133212 | 0.029649711  |
| chr12 | 98250001 | 98350000 | 957  | 826 | 98300000  | 0.140005 | 0.023758823  |
| chr12 | 99550001 | 99650000 | 948  | 818 | 99600000  | 0.140414 | 0.023438084  |
| chr12 | 99600001 | 99700000 | 1001 | 867 | 99650000  | 0.134966 | 0.028022859  |
| chr12 | 99800001 | 99900000 | 1026 | 886 | 99850000  | 0.13928  | 0.024336381  |
| chr12 | 1E+08    | 1E+08    | 983  | 856 | 100050000 | 0.127209 | 0.035824221  |
| chr12 | 1E+08    | 1E+08    | 887  | 770 | 100100000 | 0.131704 | 0.0311111103 |
| chr12 | 1.01E+08 | 1.01E+08 | 1040 | 889 | 101300000 | 0.153956 | 0.014704098  |
| chr12 | 1.01E+08 | 1.01E+08 | 1062 | 926 | 101350000 | 0.125328 | 0.037963554  |
| chr12 | 1.01E+08 | 1.02E+08 | 885  | 770 | 101500000 | 0.128447 | 0.034470599  |
| chr12 | 1.02E+08 | 1.02E+08 | 1047 | 855 | 102150000 | 0.219893 | 0.000963031  |
| chr12 | 1.02E+08 | 1.02E+08 | 993  | 855 | 102200000 | 0.143498 | 0.021136423  |
| chr12 | 1.02E+08 | 1.02E+08 | 905  | 789 | 102300000 | 0.125521 | 0.037739537  |
| chr12 | 1.02E+08 | 1.02E+08 | 1053 | 873 | 102350000 | 0.19808  | 0.002580629  |
| chr12 | 1.02E+08 | 1.02E+08 | 1070 | 904 | 102400000 | 0.170844 | 0.007863075  |
| chr12 | 1.03E+08 | 1.03E+08 | 901  | 938 | 102700000 | -0.13043 | 0.032086833  |
| chr12 | 1.03E+08 | 1.03E+08 | 916  | 967 | 102800000 | -0.15054 | 0.016360735  |

|       |          |          |      |      |           |          |             |
|-------|----------|----------|------|------|-----------|----------|-------------|
| chr12 | 1.03E+08 | 1.03E+08 | 1027 | 892  | 1.03E+08  | 0.130949 | 0.031864797 |
| chr12 | 1.04E+08 | 1.04E+08 | 982  | 1013 | 104050000 | -0.11721 | 0.048086472 |
| chr12 | 1.05E+08 | 1.05E+08 | 850  | 879  | 104700000 | -0.12077 | 0.043250486 |
| chr12 | 1.05E+08 | 1.05E+08 | 834  | 895  | 104750000 | -0.17421 | 0.006757634 |
| chr12 | 1.05E+08 | 1.05E+08 | 996  | 1092 | 105050000 | -0.20513 | 0.001832905 |
| chr12 | 1.05E+08 | 1.05E+08 | 1080 | 1153 | 105100000 | -0.16673 | 0.009031891 |
| chr12 | 1.05E+08 | 1.05E+08 | 1019 | 878  | 105200000 | 0.142489 | 0.021866932 |
| chr12 | 1.05E+08 | 1.05E+08 | 1014 | 876  | 105400000 | 0.138683 | 0.024821004 |
| chr12 | 1.06E+08 | 1.06E+08 | 1044 | 915  | 106150000 | 0.117906 | 0.047446814 |
| chr12 | 1.06E+08 | 1.06E+08 | 1048 | 911  | 106200000 | 0.129744 | 0.03309868  |
| chr12 | 1.07E+08 | 1.07E+08 | 1013 | 1058 | 106550000 | -0.13508 | 0.027636462 |
| chr12 | 1.07E+08 | 1.07E+08 | 960  | 1016 | 106600000 | -0.15417 | 0.014380549 |
| chr12 | 1.08E+08 | 1.08E+08 | 1122 | 1178 | 107750000 | -0.14264 | 0.021499067 |
| chr12 | 1.09E+08 | 1.09E+08 | 1122 | 1203 | 108550000 | -0.17294 | 0.00710558  |
| chr12 | 1.09E+08 | 1.09E+08 | 1130 | 1186 | 108600000 | -0.14215 | 0.021855193 |
| chr12 | 1.09E+08 | 1.09E+08 | 1093 | 1138 | 108750000 | -0.13058 | 0.031938068 |
| chr12 | 1.09E+08 | 1.09E+08 | 1067 | 1119 | 1.09E+08  | -0.14102 | 0.022704279 |
| chr12 | 1.09E+08 | 1.09E+08 | 695  | 735  | 109350000 | -0.1531  | 0.014938357 |
| chr12 | 1.09E+08 | 1.1E+08  | 680  | 569  | 109450000 | 0.184734 | 0.004527395 |
| chr12 | 1.1E+08  | 1.1E+08  | 1061 | 1097 | 109950000 | -0.12051 | 0.04359161  |
| chr12 | 1.1E+08  | 1.1E+08  | 1042 | 1148 | 1.10E+08  | -0.21214 | 0.001331375 |
| chr12 | 1.1E+08  | 1.1E+08  | 1050 | 1156 | 110050000 | -0.21112 | 0.001395209 |
| chr12 | 1.1E+08  | 1.1E+08  | 1072 | 1151 | 110200000 | -0.17495 | 0.006562203 |
| chr12 | 1.1E+08  | 1.1E+08  | 979  | 1072 | 110250000 | -0.2033  | 0.001989604 |
| chr12 | 1.1E+08  | 1.1E+08  | 918  | 965  | 110300000 | -0.14441 | 0.020243838 |
| chr12 | 1.11E+08 | 1.11E+08 | 887  | 775  | 110600000 | 0.122366 | 0.041543414 |
| chr12 | 1.11E+08 | 1.11E+08 | 918  | 782  | 110650000 | 0.158954 | 0.012281076 |
| chr12 | 1.12E+08 | 1.12E+08 | 1046 | 1095 | 111650000 | -0.13842 | 0.02476315  |
| chr12 | 1.12E+08 | 1.12E+08 | 967  | 1033 | 111700000 | -0.16762 | 0.008729551 |
| chr12 | 1.12E+08 | 1.12E+08 | 887  | 922  | 111750000 | -0.1282  | 0.034423614 |
| chr12 | 1.12E+08 | 1.12E+08 | 720  | 772  | 112050000 | -0.17298 | 0.007094447 |
| chr12 | 1.12E+08 | 1.12E+08 | 752  | 780  | 112100000 | -0.12511 | 0.037895843 |
| chr12 | 1.13E+08 | 1.13E+08 | 927  | 801  | 112700000 | 0.138395 | 0.025057402 |
| chr12 | 1.13E+08 | 1.13E+08 | 886  | 773  | 112900000 | 0.124467 | 0.038977613 |
| chr12 | 1.13E+08 | 1.13E+08 | 853  | 896  | 1.13E+08  | -0.14332 | 0.021004297 |
| chr12 | 1.13E+08 | 1.13E+08 | 910  | 941  | 113050000 | -0.1207  | 0.0433444   |
| chr12 | 1.14E+08 | 1.14E+08 | 1052 | 1134 | 113550000 | -0.18066 | 0.005221015 |
| chr12 | 1.14E+08 | 1.14E+08 | 981  | 1104 | 113600000 | -0.24279 | 0.000296964 |
| chr12 | 1.14E+08 | 1.14E+08 | 922  | 981  | 113850000 | -0.16186 | 0.010853614 |
| chr12 | 1.14E+08 | 1.14E+08 | 989  | 1027 | 113900000 | -0.12677 | 0.036005831 |
| chr12 | 1.14E+08 | 1.14E+08 | 1010 | 1082 | 114100000 | -0.17172 | 0.007452527 |
| chr12 | 1.14E+08 | 1.14E+08 | 1021 | 1124 | 114150000 | -0.21103 | 0.001401188 |
| chr12 | 1.14E+08 | 1.14E+08 | 1031 | 1132 | 114200000 | -0.2072  | 0.001669031 |
| chr12 | 1.14E+08 | 1.14E+08 | 1101 | 1157 | 114250000 | -0.14395 | 0.020564567 |
| chr12 | 1.15E+08 | 1.15E+08 | 1116 | 1156 | 114600000 | -0.12318 | 0.040214144 |
| chr12 | 1.15E+08 | 1.15E+08 | 985  | 1022 | 115150000 | -0.12557 | 0.037363875 |
| chr12 | 1.15E+08 | 1.15E+08 | 971  | 812  | 115250000 | 0.18562  | 0.004365856 |

|       |          |          |      |      |           |          |             |
|-------|----------|----------|------|------|-----------|----------|-------------|
| chr12 | 1.16E+08 | 1.16E+08 | 1014 | 1084 | 116150000 | -0.16868 | 0.008383307 |
| chr12 | 1.16E+08 | 1.16E+08 | 1010 | 1050 | 116200000 | -0.12841 | 0.034206803 |
| chr12 | 1.16E+08 | 1.17E+08 | 992  | 1033 | 116450000 | -0.1308  | 0.031714417 |
| chr12 | 1.17E+08 | 1.17E+08 | 1020 | 874  | 116550000 | 0.150492 | 0.016616766 |
| chr12 | 1.17E+08 | 1.17E+08 | 940  | 996  | 117300000 | -0.15586 | 0.013530158 |
| chr12 | 1.17E+08 | 1.17E+08 | 928  | 1015 | 117350000 | -0.20165 | 0.002140308 |
| chr12 | 1.17E+08 | 1.17E+08 | 950  | 1053 | 117400000 | -0.22088 | 0.000882947 |
| chr12 | 1.17E+08 | 1.18E+08 | 1000 | 1092 | 117450000 | -0.19934 | 0.002370059 |
| chr12 | 1.18E+08 | 1.18E+08 | 953  | 994  | 117600000 | -0.13314 | 0.029424349 |
| chr12 | 1.18E+08 | 1.18E+08 | 1035 | 1085 | 117850000 | -0.14044 | 0.023154592 |
| chr12 | 1.18E+08 | 1.18E+08 | 1050 | 1085 | 117900000 | -0.11968 | 0.044693179 |
| chr12 | 1.18E+08 | 1.18E+08 | 1064 | 1114 | 117950000 | -0.13862 | 0.024597003 |
| chr12 | 1.18E+08 | 1.18E+08 | 970  | 1014 | 118300000 | -0.13637 | 0.026491343 |
| chr12 | 1.19E+08 | 1.19E+08 | 1055 | 894  | 119350000 | 0.166524 | 0.009272103 |
| chr12 | 1.19E+08 | 1.2E+08  | 977  | 1022 | 119500000 | -0.13734 | 0.025665524 |
| chr12 | 1.2E+08  | 1.2E+08  | 1005 | 1050 | 119550000 | -0.13557 | 0.02720003  |
| chr12 | 1.2E+08  | 1.2E+08  | 900  | 949  | 120100000 | -0.14885 | 0.017358053 |
| chr12 | 1.2E+08  | 1.2E+08  | 950  | 982  | 120150000 | -0.12017 | 0.044042897 |
| chr12 | 1.2E+08  | 1.2E+08  | 790  | 821  | 120400000 | -0.1279  | 0.034752032 |
| chr12 | 1.2E+08  | 1.21E+08 | 865  | 902  | 120450000 | -0.1328  | 0.029750333 |
| chr12 | 1.21E+08 | 1.21E+08 | 919  | 949  | 120600000 | -0.11871 | 0.045993605 |
| chr12 | 1.21E+08 | 1.21E+08 | 900  | 943  | 120650000 | -0.1397  | 0.023727685 |
| chr12 | 1.21E+08 | 1.21E+08 | 863  | 903  | 120700000 | -0.13774 | 0.025328579 |
| chr12 | 1.21E+08 | 1.21E+08 | 817  | 865  | 120750000 | -0.15474 | 0.014088885 |
| chr12 | 1.21E+08 | 1.21E+08 | 871  | 920  | 120800000 | -0.15133 | 0.015908795 |
| chr12 | 1.21E+08 | 1.21E+08 | 1038 | 869  | 121250000 | 0.184007 | 0.004664144 |
| chr12 | 1.21E+08 | 1.21E+08 | 969  | 833  | 121300000 | 0.145808 | 0.019539702 |
| chr12 | 1.21E+08 | 1.21E+08 | 832  | 706  | 121350000 | 0.164544 | 0.009989257 |
| chr12 | 1.21E+08 | 1.22E+08 | 883  | 927  | 121450000 | -0.14253 | 0.021580003 |
| chr12 | 1.22E+08 | 1.22E+08 | 877  | 942  | 121700000 | -0.17552 | 0.006416308 |
| chr12 | 1.22E+08 | 1.22E+08 | 803  | 836  | 121750000 | -0.13047 | 0.032043938 |
| chr12 | 1.22E+08 | 1.22E+08 | 877  | 937  | 121850000 | -0.16784 | 0.008656388 |
| chr12 | 1.22E+08 | 1.22E+08 | 731  | 802  | 122150000 | -0.2061  | 0.001754088 |
| chr12 | 1.22E+08 | 1.22E+08 | 831  | 890  | 122300000 | -0.17133 | 0.007566179 |
| chr12 | 1.23E+08 | 1.23E+08 | 607  | 628  | 122600000 | -0.12144 | 0.042389102 |
| chr12 | 1.23E+08 | 1.23E+08 | 844  | 902  | 122650000 | -0.16826 | 0.008520592 |
| chr12 | 1.23E+08 | 1.23E+08 | 867  | 736  | 123050000 | 0.163954 | 0.010211706 |
| chr12 | 1.23E+08 | 1.24E+08 | 970  | 1011 | 123450000 | -0.1321  | 0.03042718  |
| chr12 | 1.23E+08 | 1.24E+08 | 1092 | 1139 | 123500000 | -0.13317 | 0.02940042  |
| chr12 | 1.24E+08 | 1.24E+08 | 1092 | 1170 | 123550000 | -0.17191 | 0.007397339 |
| chr12 | 1.24E+08 | 1.24E+08 | 1021 | 1086 | 124400000 | -0.16141 | 0.011034939 |
| chr12 | 1.24E+08 | 1.25E+08 | 1066 | 1131 | 124450000 | -0.15776 | 0.012623848 |
| chr12 | 1.24E+08 | 1.25E+08 | 1034 | 1107 | 124500000 | -0.17079 | 0.007726103 |
| chr12 | 1.25E+08 | 1.25E+08 | 947  | 995  | 124550000 | -0.1437  | 0.020735086 |
| chr12 | 1.25E+08 | 1.25E+08 | 899  | 948  | 124600000 | -0.14894 | 0.017307827 |
| chr12 | 1.25E+08 | 1.25E+08 | 926  | 998  | 124650000 | -0.1804  | 0.005276024 |
| chr12 | 1.25E+08 | 1.25E+08 | 1130 | 1215 | 124800000 | -0.17701 | 0.006048336 |

|       |          |          |      |      |           |          |             |
|-------|----------|----------|------|------|-----------|----------|-------------|
| chr12 | 1.25E+08 | 1.25E+08 | 1114 | 1267 | 124850000 | -0.25804 | 0.000132228 |
| chr12 | 1.25E+08 | 1.25E+08 | 1136 | 1269 | 124900000 | -0.2321  | 0.000510699 |
| chr12 | 1.25E+08 | 1.25E+08 | 1163 | 1290 | 124950000 | -0.22189 | 0.000841115 |
| chr12 | 1.25E+08 | 1.25E+08 | 1116 | 1280 | 1.25E+08  | -0.27018 | 6.74E-05    |
| chr12 | 1.25E+08 | 1.25E+08 | 1074 | 1142 | 125050000 | -0.16094 | 0.011230322 |
| chr12 | 1.25E+08 | 1.25E+08 | 1080 | 1120 | 125150000 | -0.12484 | 0.038217021 |
| chr12 | 1.25E+08 | 1.25E+08 | 1066 | 1129 | 125200000 | -0.15521 | 0.013850237 |
| chr12 | 1.25E+08 | 1.25E+08 | 855  | 916  | 125400000 | -0.17179 | 0.007429891 |
| chr12 | 1.25E+08 | 1.26E+08 | 845  | 896  | 125450000 | -0.15692 | 0.013018405 |
| chr12 | 1.26E+08 | 1.26E+08 | 856  | 911  | 125550000 | -0.16221 | 0.01071133  |
| chr12 | 1.26E+08 | 1.26E+08 | 945  | 1039 | 125600000 | -0.20918 | 0.00152522  |
| chr12 | 1.26E+08 | 1.26E+08 | 1004 | 1061 | 125650000 | -0.15204 | 0.015516402 |
| chr12 | 1.26E+08 | 1.26E+08 | 1013 | 1118 | 125700000 | -0.21466 | 0.001184404 |
| chr12 | 1.26E+08 | 1.26E+08 | 1020 | 1079 | 125750000 | -0.1535  | 0.014729201 |
| chr12 | 1.26E+08 | 1.26E+08 | 982  | 1017 | 125950000 | -0.1229  | 0.040558136 |
| chr12 | 1.27E+08 | 1.27E+08 | 1087 | 941  | 126650000 | 0.135714 | 0.027352788 |
| chr12 | 1.27E+08 | 1.27E+08 | 1024 | 1078 | 127200000 | -0.14651 | 0.018829943 |
| chr12 | 1.27E+08 | 1.27E+08 | 1024 | 1063 | 127250000 | -0.1263  | 0.036532995 |
| chr12 | 1.29E+08 | 1.29E+08 | 1041 | 1099 | 128650000 | -0.15059 | 0.016330169 |
| chr12 | 1.29E+08 | 1.29E+08 | 1061 | 1148 | 128800000 | -0.18607 | 0.004180228 |
| chr12 | 1.29E+08 | 1.29E+08 | 1020 | 1117 | 128850000 | -0.20343 | 0.001977568 |
| chr12 | 1.29E+08 | 1.29E+08 | 1001 | 1033 | 128900000 | -0.11777 | 0.047299798 |
| chr12 | 1.29E+08 | 1.29E+08 | 1036 | 1073 | 129150000 | -0.123   | 0.040433212 |
| chr12 | 1.29E+08 | 1.3E+08  | 810  | 917  | 129500000 | -0.25137 | 0.000189296 |
| chr12 | 1.3E+08  | 1.3E+08  | 843  | 930  | 129550000 | -0.21407 | 0.001217313 |
| chr12 | 1.3E+08  | 1.3E+08  | 986  | 1064 | 129600000 | -0.18221 | 0.004901016 |
| chr12 | 1.3E+08  | 1.3E+08  | 996  | 1089 | 129650000 | -0.20116 | 0.002187926 |
| chr12 | 1.3E+08  | 1.3E+08  | 866  | 916  | 129800000 | -0.15335 | 0.014805867 |
| chr12 | 1.3E+08  | 1.3E+08  | 937  | 976  | 129850000 | -0.1312  | 0.031309183 |
| chr12 | 1.3E+08  | 1.3E+08  | 1004 | 1069 | 130350000 | -0.16287 | 0.010449394 |
| chr12 | 1.3E+08  | 1.31E+08 | 1024 | 1060 | 130500000 | -0.12222 | 0.041399904 |
| chr12 | 1.31E+08 | 1.31E+08 | 1009 | 1040 | 130550000 | -0.11603 | 0.049784167 |
| chr12 | 1.31E+08 | 1.31E+08 | 1029 | 1102 | 130600000 | -0.17125 | 0.007588486 |
| chr12 | 1.31E+08 | 1.31E+08 | 1062 | 1140 | 130650000 | -0.17462 | 0.006649173 |
| chr12 | 1.31E+08 | 1.31E+08 | 1087 | 1136 | 130700000 | -0.13598 | 0.026831895 |
| chr12 | 1.31E+08 | 1.31E+08 | 1057 | 1115 | 130750000 | -0.14944 | 0.017005953 |
| chr12 | 1.31E+08 | 1.31E+08 | 1083 | 1168 | 130950000 | -0.18138 | 0.005070151 |
| chr12 | 1.31E+08 | 1.31E+08 | 988  | 1061 | 131100000 | -0.17521 | 0.006495289 |
| chr12 | 1.31E+08 | 1.31E+08 | 983  | 1095 | 131150000 | -0.22804 | 0.000624226 |
| chr12 | 1.31E+08 | 1.31E+08 | 939  | 1087 | 131200000 | -0.28353 | 3.12E-05    |
| chr12 | 1.31E+08 | 1.31E+08 | 969  | 1031 | 131250000 | -0.16185 | 0.010857911 |
| chr12 | 1.31E+08 | 1.31E+08 | 854  | 899  | 131350000 | -0.14646 | 0.01886668  |
| chr12 | 1.31E+08 | 1.32E+08 | 1045 | 1080 | 131500000 | -0.1199  | 0.044396614 |
| chr12 | 1.32E+08 | 1.32E+08 | 1035 | 1139 | 131550000 | -0.21051 | 0.001435233 |
| chr12 | 1.32E+08 | 1.32E+08 | 871  | 951  | 131700000 | -0.19914 | 0.00239099  |
| chr12 | 1.32E+08 | 1.32E+08 | 688  | 826  | 131750000 | -0.3361  | 1.11E-06    |
| chr12 | 1.32E+08 | 1.32E+08 | 655  | 751  | 131800000 | -0.26969 | 6.93E-05    |



|       |          |          |      |      |           |          |             |
|-------|----------|----------|------|------|-----------|----------|-------------|
| chr12 | 1.32E+08 | 1.32E+08 | 877  | 955  | 131850000 | -0.1953  | 0.002827313 |
| chr12 | 1.32E+08 | 1.32E+08 | 945  | 999  | 131900000 | -0.15254 | 0.015240198 |
| chr12 | 1.32E+08 | 1.32E+08 | 908  | 996  | 1.32E+08  | -0.20583 | 0.001776177 |
| chr12 | 1.32E+08 | 1.32E+08 | 947  | 1093 | 132050000 | -0.27923 | 4.01E-05    |
| chr12 | 1.32E+08 | 1.32E+08 | 770  | 819  | 132100000 | -0.16138 | 0.011049813 |
| chr12 | 1.32E+08 | 1.32E+08 | 732  | 773  | 132150000 | -0.151   | 0.016099208 |
| chr12 | 1.32E+08 | 1.32E+08 | 933  | 1014 | 132200000 | -0.19248 | 0.003190763 |
| chr12 | 1.32E+08 | 1.32E+08 | 955  | 996  | 132250000 | -0.13302 | 0.029542678 |
| chr12 | 1.32E+08 | 1.32E+08 | 984  | 1050 | 132300000 | -0.16603 | 0.009276496 |
| chr12 | 1.32E+08 | 1.32E+08 | 924  | 1048 | 132350000 | -0.25405 | 0.000164082 |
| chr12 | 1.32E+08 | 1.32E+08 | 869  | 940  | 132400000 | -0.18568 | 0.004249081 |
| chr12 | 1.32E+08 | 1.33E+08 | 895  | 985  | 132450000 | -0.21061 | 0.001428716 |
| chr12 | 1.32E+08 | 1.33E+08 | 937  | 1037 | 132500000 | -0.21867 | 0.000980902 |
| chr12 | 1.33E+08 | 1.33E+08 | 958  | 1015 | 132550000 | -0.15575 | 0.013580597 |
| chr12 | 1.33E+08 | 1.33E+08 | 954  | 1134 | 132600000 | -0.32173 | 2.89E-06    |
| chr12 | 1.33E+08 | 1.33E+08 | 1047 | 1289 | 132650000 | -0.37236 | 8.39E-08    |
| chr12 | 1.33E+08 | 1.33E+08 | 626  | 719  | 132700000 | -0.2722  | 6.01E-05    |
| chr12 | 1.33E+08 | 1.33E+08 | 70   | 85   | 132750000 | -0.35248 | 3.55E-07    |
| chr12 | 1.33E+08 | 1.33E+08 | 374  | 453  | 132800000 | -0.34884 | 4.59E-07    |
| chr12 | 1.33E+08 | 1.33E+08 | 893  | 1071 | 132850000 | -0.3346  | 1.23E-06    |
| chr12 | 1.33E+08 | 1.33E+08 | 1046 | 1250 | 132900000 | -0.32942 | 1.74E-06    |
| chr12 | 1.33E+08 | 1.33E+08 | 991  | 1196 | 132950000 | -0.34363 | 6.60E-07    |
| chr12 | 1.33E+08 | 1.33E+08 | 993  | 1167 | 1.33E+08  | -0.30531 | 8.29E-06    |
| chr12 | 1.33E+08 | 1.33E+08 | 1061 | 1261 | 133050000 | -0.32152 | 2.93E-06    |
| chr12 | 1.33E+08 | 1.33E+08 | 1090 | 1360 | 133100000 | -0.39165 | 1.94E-08    |
| chr12 | 1.33E+08 | 1.33E+08 | 1040 | 1317 | 133150000 | -0.41304 | 3.57E-09    |
| chr12 | 1.33E+08 | 1.33E+08 | 1002 | 1141 | 133200000 | -0.25979 | 0.000120194 |
| chr12 | 1.33E+08 | 1.33E+08 | 923  | 957  | 133250000 | -0.12456 | 0.038546461 |
| chr12 | 1.33E+08 | 1.33E+08 | 843  | 918  | 133300000 | -0.19533 | 0.002822719 |
| chr12 | 1.33E+08 | 1.33E+08 | 833  | 972  | 133350000 | -0.29501 | 1.57E-05    |
| chr12 | 1.33E+08 | 1.33E+08 | 837  | 908  | 133400000 | -0.18984 | 0.003569942 |
| chr12 | 1.34E+08 | 1.34E+08 | 959  | 823  | 133600000 | 0.148267 | 0.017955186 |
| chr12 | 1.34E+08 | 1.34E+08 | 276  | 291  | 133850000 | -0.14872 | 0.017438446 |
| chr15 | 20000001 | 20100000 | 350  | 306  | 20050000  | 0.121451 | 0.042702652 |
| chr15 | 20050001 | 20150000 | 177  | 155  | 20100000  | 0.119109 | 0.045791476 |
| chr15 | 20100001 | 20200000 | 283  | 295  | 20150000  | -0.13228 | 0.030245803 |
| chr15 | 20150001 | 20250000 | 196  | 210  | 20200000  | -0.17191 | 0.007397339 |
| chr15 | 20200001 | 20300000 | 8    | 9    | 20250000  | -0.2423  | 0.000304577 |
| chr15 | 20250001 | 20350000 | 13   | 25   | 20300000  | -1.01579 | 3.09E-40    |
| chr15 | 20300001 | 20400000 | 28   | 49   | 20350000  | -0.87973 | 6.33E-32    |
| chr15 | 20350001 | 20450000 | 128  | 142  | 20400000  | -0.22212 | 0.000831997 |
| chr15 | 20400001 | 20500000 | 367  | 388  | 20450000  | -0.15265 | 0.015182628 |
| chr15 | 20450001 | 20550000 | 594  | 689  | 20500000  | -0.28641 | 2.63E-05    |
| chr15 | 20500001 | 20600000 | 976  | 1028 | 20550000  | -0.14726 | 0.018350038 |
| chr15 | 20650001 | 20750000 | 9    | 12   | 20700000  | -0.48741 | 5.63E-12    |
| chr15 | 20700001 | 20800000 | 13   | 11   | 20750000  | 0.168636 | 0.008557728 |
| chr15 | 20750001 | 20850000 | 100  | 85   | 20800000  | 0.162093 | 0.01094313  |

|       |          |          |      |      |          |          |             |
|-------|----------|----------|------|------|----------|----------|-------------|
| chr15 | 20900001 | 21000000 | 22   | 15   | 20950000 | 0.480169 | 1.58E-11    |
| chr15 | 20950001 | 21050000 | 16   | 10   | 2.10E+07 | 0.6057   | 7.32E-17    |
| chr15 | 21000001 | 21100000 | 12   | 7    | 21050000 | 0.705236 | 1.10E-21    |
| chr15 | 21150001 | 21250000 | 63   | 72   | 21200000 | -0.26502 | 9.01E-05    |
| chr15 | 21800001 | 21900000 | 16   | 18   | 21850000 | -0.2423  | 0.000304577 |
| chr15 | 21950001 | 22050000 | 30   | 37   | 2.20E+07 | -0.37493 | 6.93E-08    |
| chr15 | 22000001 | 22100000 | 34   | 40   | 22050000 | -0.30684 | 7.53E-06    |
| chr15 | 22050001 | 22150000 | 20   | 17   | 22100000 | 0.162093 | 0.01094313  |
| chr15 | 22100001 | 22200000 | 31   | 25   | 22150000 | 0.237968 | 0.0003996   |
| chr15 | 22200001 | 22300000 | 24   | 20   | 22250000 | 0.190663 | 0.003540577 |
| chr15 | 22250001 | 22350000 | 464  | 390  | 22300000 | 0.178279 | 0.005876073 |
| chr15 | 22300001 | 22400000 | 783  | 679  | 22350000 | 0.133229 | 0.029633953 |
| chr15 | 22450001 | 22550000 | 953  | 1044 | 22500000 | -0.20395 | 0.001932681 |
| chr15 | 22500001 | 22600000 | 699  | 848  | 22550000 | -0.35114 | 3.90E-07    |
| chr15 | 22550001 | 22650000 | 235  | 264  | 22600000 | -0.24025 | 0.000338398 |
| chr15 | 22600001 | 22700000 | 16   | 19   | 22650000 | -0.3203  | 3.18E-06    |
| chr15 | 22700001 | 22800000 | 311  | 339  | 22750000 | -0.19674 | 0.002655482 |
| chr15 | 22750001 | 22850000 | 669  | 717  | 22800000 | -0.17234 | 0.00727372  |
| chr15 | 23100001 | 23200000 | 98   | 64   | 23150000 | 0.542338 | 4.68E-14    |
| chr15 | 23200001 | 23300000 | 56   | 66   | 23250000 | -0.30941 | 6.40E-06    |
| chr15 | 23250001 | 23350000 | 20   | 27   | 23300000 | -0.50533 | 1.05E-12    |
| chr15 | 23300001 | 23400000 | 17   | 12   | 23350000 | 0.430129 | 1.15E-09    |
| chr15 | 23350001 | 23450000 | 16   | 10   | 23400000 | 0.6057   | 7.32E-17    |
| chr15 | 23450001 | 23550000 | 15   | 17   | 23500000 | -0.25294 | 0.000174062 |
| chr15 | 23500001 | 23600000 | 5    | 7    | 23550000 | -0.5578  | 5.82E-15    |
| chr15 | 23600001 | 23700000 | 382  | 415  | 23650000 | -0.19191 | 0.003269287 |
| chr15 | 24200001 | 24300000 | 918  | 803  | 24250000 | 0.120722 | 0.04364554  |
| chr15 | 24350001 | 24450000 | 314  | 251  | 24400000 | 0.250705 | 0.000207789 |
| chr15 | 24450001 | 24550000 | 285  | 310  | 24500000 | -0.19368 | 0.003031284 |
| chr15 | 24550001 | 24650000 | 246  | 276  | 24600000 | -0.23838 | 0.000372257 |
| chr15 | 24600001 | 24700000 | 266  | 325  | 24650000 | -0.36139 | 1.88E-07    |
| chr15 | 25250001 | 25350000 | 1024 | 1074 | 25300000 | -0.14115 | 0.022606522 |
| chr15 | 25300001 | 25400000 | 1046 | 1082 | 25350000 | -0.12119 | 0.042710478 |
| chr15 | 25400001 | 25500000 | 1025 | 1109 | 25450000 | -0.18601 | 0.004191105 |
| chr15 | 25450001 | 25550000 | 926  | 986  | 25500000 | -0.16295 | 0.01042092  |
| chr15 | 25950001 | 26050000 | 1023 | 1071 | 2.60E+07 | -0.13852 | 0.02467768  |
| chr15 | 26000001 | 26100000 | 999  | 1061 | 26050000 | -0.15924 | 0.011958568 |
| chr15 | 26050001 | 26150000 | 1025 | 1062 | 26100000 | -0.12353 | 0.039780256 |
| chr15 | 26950001 | 27050000 | 966  | 996  | 2.70E+07 | -0.11649 | 0.049110311 |
| chr15 | 27250001 | 27350000 | 1054 | 1115 | 27300000 | -0.15354 | 0.014706484 |
| chr15 | 27300001 | 27400000 | 1043 | 1144 | 27350000 | -0.20572 | 0.001784648 |
| chr15 | 27350001 | 27450000 | 973  | 1048 | 27400000 | -0.1795  | 0.005471879 |
| chr15 | 27400001 | 27500000 | 955  | 986  | 27450000 | -0.11846 | 0.046344999 |
| chr15 | 27600001 | 27700000 | 1100 | 943  | 27650000 | 0.149802 | 0.017022314 |
| chr15 | 28550001 | 28650000 | 32   | 26   | 28600000 | 0.227189 | 0.000679876 |
| chr15 | 28600001 | 28700000 | 9    | 3    | 28650000 | 1.512591 | 1.57E-69    |
| chr15 | 28650001 | 28750000 | 105  | 84   | 28700000 | 0.249556 | 0.000220671 |

|       |          |          |      |      |          |          |             |
|-------|----------|----------|------|------|----------|----------|-------------|
| chr15 | 28800001 | 28900000 | 10   | 4    | 28850000 | 1.249556 | 2.09E-53    |
| chr15 | 28950001 | 29050000 | 74   | 77   | 2.90E+07 | -0.1297  | 0.032835067 |
| chr15 | 29000001 | 29100000 | 87   | 95   | 29050000 | -0.19928 | 0.002376391 |
| chr15 | 29100001 | 29200000 | 485  | 512  | 29150000 | -0.15053 | 0.016366059 |
| chr15 | 29150001 | 29250000 | 500  | 546  | 29200000 | -0.19934 | 0.002370059 |
| chr15 | 29300001 | 29400000 | 1030 | 1081 | 29350000 | -0.14209 | 0.021898836 |
| chr15 | 29350001 | 29450000 | 1050 | 1176 | 29400000 | -0.23587 | 0.000422781 |
| chr15 | 29400001 | 29500000 | 976  | 1032 | 29450000 | -0.15286 | 0.015067596 |
| chr15 | 29550001 | 29650000 | 984  | 1026 | 29600000 | -0.13267 | 0.029871827 |
| chr15 | 29700001 | 29800000 | 902  | 943  | 29750000 | -0.1365  | 0.026379237 |
| chr15 | 30350001 | 30450000 | 201  | 222  | 30400000 | -0.21574 | 0.001126168 |
| chr15 | 30500001 | 30600000 | 11   | 6    | 30550000 | 0.802097 | 8.67E-27    |
| chr15 | 30550001 | 30650000 | 14   | 9    | 30600000 | 0.565058 | 4.89E-15    |
| chr15 | 30600001 | 30700000 | 16   | 23   | 30650000 | -0.59593 | 1.05E-16    |
| chr15 | 30650001 | 30750000 | 8    | 21   | 30700000 | -1.46469 | 3.63E-69    |
| chr15 | 30700001 | 30800000 | 8    | 17   | 30750000 | -1.15983 | 2.03E-49    |
| chr15 | 30800001 | 30900000 | 9    | 5    | 30850000 | 0.775625 | 2.34E-25    |
| chr15 | 31000001 | 31100000 | 250  | 273  | 31050000 | -0.19934 | 0.002370059 |
| chr15 | 31050001 | 31150000 | 372  | 404  | 31100000 | -0.19142 | 0.003337618 |
| chr15 | 31650001 | 31750000 | 983  | 1053 | 31700000 | -0.17161 | 0.00748255  |
| chr15 | 31750001 | 31850000 | 1019 | 1054 | 31800000 | -0.12109 | 0.042835287 |
| chr15 | 31800001 | 31900000 | 960  | 1013 | 31850000 | -0.1499  | 0.016733795 |
| chr15 | 31950001 | 32050000 | 392  | 325  | 3.20E+07 | 0.198042 | 0.00258487  |
| chr15 | 32450001 | 32550000 | 94   | 75   | 32500000 | 0.253398 | 0.000180307 |
| chr15 | 32500001 | 32600000 | 87   | 70   | 32550000 | 0.241289 | 0.000337884 |
| chr15 | 32600001 | 32700000 | 15   | 16   | 32650000 | -0.16548 | 0.009472046 |
| chr15 | 32650001 | 32750000 | 6    | 15   | 32700000 | -1.3943  | 1.23E-64    |
| chr15 | 32700001 | 32800000 | 3    | 11   | 32750000 | -1.94684 | 3.29E-98    |
| chr15 | 32750001 | 32850000 | 6    | 11   | 32800000 | -0.94684 | 5.75E-36    |
| chr15 | 32800001 | 32900000 | 15   | 13   | 32850000 | 0.134079 | 0.028836197 |
| chr15 | 33550001 | 33650000 | 942  | 987  | 33600000 | -0.13969 | 0.023735399 |
| chr15 | 34200001 | 34300000 | 1064 | 906  | 34250000 | 0.159543 | 0.012019463 |
| chr15 | 34250001 | 34350000 | 1026 | 855  | 34300000 | 0.190663 | 0.003540577 |
| chr15 | 34350001 | 34450000 | 906  | 788  | 34400000 | 0.128944 | 0.033939971 |
| chr15 | 34500001 | 34600000 | 961  | 831  | 34550000 | 0.137316 | 0.025960797 |
| chr15 | 34600001 | 34700000 | 637  | 679  | 34650000 | -0.16449 | 0.0098338   |
| chr15 | 34650001 | 34750000 | 381  | 409  | 34700000 | -0.17468 | 0.006633478 |
| chr15 | 34800001 | 34900000 | 319  | 335  | 34850000 | -0.14298 | 0.021254251 |
| chr15 | 34850001 | 34950000 | 663  | 528  | 34900000 | 0.256099 | 0.000156199 |
| chr15 | 34900001 | 35000000 | 988  | 829  | 34950000 | 0.180767 | 0.00531879  |
| chr15 | 35100001 | 35200000 | 1055 | 918  | 35150000 | 0.128305 | 0.034623714 |
| chr15 | 35150001 | 35250000 | 962  | 779  | 35200000 | 0.232042 | 0.000536542 |
| chr15 | 35200001 | 35300000 | 859  | 753  | 35250000 | 0.117636 | 0.04782456  |
| chr15 | 35450001 | 35550000 | 838  | 877  | 35500000 | -0.138   | 0.025110969 |
| chr15 | 36450001 | 36550000 | 974  | 815  | 36500000 | 0.18475  | 0.0045245   |
| chr15 | 36900001 | 37000000 | 1002 | 864  | 36950000 | 0.141408 | 0.022674633 |
| chr15 | 36950001 | 37050000 | 1005 | 850  | 3.70E+07 | 0.169289 | 0.00834698  |

|       |          |          |      |      |          |          |             |
|-------|----------|----------|------|------|----------|----------|-------------|
| chr15 | 37500001 | 37600000 | 974  | 853  | 37550000 | 0.119004 | 0.045934221 |
| chr15 | 37550001 | 37650000 | 889  | 769  | 37600000 | 0.136828 | 0.026378329 |
| chr15 | 37650001 | 37750000 | 809  | 705  | 37700000 | 0.126145 | 0.037022061 |
| chr15 | 37700001 | 37800000 | 838  | 658  | 37750000 | 0.276491 | 5.07E-05    |
| chr15 | 37750001 | 37850000 | 882  | 756  | 37800000 | 0.150021 | 0.016892961 |
| chr15 | 37950001 | 38050000 | 1078 | 944  | 3.80E+07 | 0.119127 | 0.045768059 |
| chr15 | 38300001 | 38400000 | 1008 | 882  | 38350000 | 0.120273 | 0.044234652 |
| chr15 | 38350001 | 38450000 | 920  | 759  | 38400000 | 0.205162 | 0.001891009 |
| chr15 | 38500001 | 38600000 | 1037 | 880  | 38550000 | 0.164469 | 0.010017294 |
| chr15 | 38600001 | 38700000 | 1097 | 945  | 38650000 | 0.142806 | 0.021635614 |
| chr15 | 38700001 | 38800000 | 994  | 1038 | 38750000 | -0.13486 | 0.027832041 |
| chr15 | 40200001 | 40300000 | 906  | 982  | 40250000 | -0.18858 | 0.003763374 |
| chr15 | 40250001 | 40350000 | 959  | 989  | 40300000 | -0.11681 | 0.048655106 |
| chr15 | 40350001 | 40450000 | 958  | 1007 | 40400000 | -0.14434 | 0.020291402 |
| chr15 | 40550001 | 40650000 | 1132 | 1292 | 40600000 | -0.2631  | 0.000100154 |
| chr15 | 40600001 | 40700000 | 1025 | 1157 | 40650000 | -0.24714 | 0.000236769 |
| chr15 | 40650001 | 40750000 | 958  | 1025 | 40700000 | -0.1699  | 0.007998136 |
| chr15 | 40900001 | 41000000 | 806  | 669  | 40950000 | 0.196402 | 0.002774385 |
| chr15 | 41150001 | 41250000 | 981  | 1060 | 41200000 | -0.18411 | 0.004533227 |
| chr15 | 41200001 | 41300000 | 998  | 1079 | 41250000 | -0.18495 | 0.004377992 |
| chr15 | 41300001 | 41400000 | 939  | 821  | 41350000 | 0.121371 | 0.042805723 |
| chr15 | 41350001 | 41450000 | 792  | 680  | 41400000 | 0.147594 | 0.01837747  |
| chr15 | 42050001 | 42150000 | 1076 | 1121 | 42100000 | -0.13148 | 0.031034629 |
| chr15 | 42100001 | 42200000 | 1149 | 1283 | 42150000 | -0.23151 | 0.000525824 |
| chr15 | 42150001 | 42250000 | 1069 | 1177 | 42200000 | -0.21122 | 0.001388774 |
| chr15 | 42200001 | 42300000 | 981  | 1078 | 42250000 | -0.2084  | 0.001580274 |
| chr15 | 42250001 | 42350000 | 1042 | 1116 | 42300000 | -0.17135 | 0.007558849 |
| chr15 | 42300001 | 42400000 | 1089 | 1132 | 42350000 | -0.12824 | 0.034383309 |
| chr15 | 43400001 | 43500000 | 808  | 834  | 43450000 | -0.11806 | 0.046890511 |
| chr15 | 43750001 | 43850000 | 928  | 965  | 43800000 | -0.12878 | 0.033811293 |
| chr15 | 43800001 | 43900000 | 554  | 580  | 43850000 | -0.13854 | 0.024665747 |
| chr15 | 43850001 | 43950000 | 190  | 164  | 43900000 | 0.139932 | 0.023816874 |
| chr15 | 43900001 | 44000000 | 170  | 146  | 43950000 | 0.147195 | 0.018632127 |
| chr15 | 44100001 | 44200000 | 958  | 823  | 44150000 | 0.146761 | 0.01891177  |
| chr15 | 44250001 | 44350000 | 915  | 793  | 44300000 | 0.134079 | 0.028836197 |
| chr15 | 44300001 | 44400000 | 990  | 820  | 44350000 | 0.199433 | 0.002433477 |
| chr15 | 44350001 | 44450000 | 989  | 825  | 44400000 | 0.189205 | 0.003763406 |
| chr15 | 44500001 | 44600000 | 790  | 688  | 44550000 | 0.127072 | 0.035976096 |
| chr15 | 44550001 | 44650000 | 910  | 751  | 44600000 | 0.204682 | 0.001931845 |
| chr15 | 44600001 | 44700000 | 820  | 716  | 44650000 | 0.123293 | 0.040395189 |
| chr15 | 45100001 | 45200000 | 376  | 326  | 45150000 | 0.133489 | 0.02938808  |
| chr15 | 45250001 | 45350000 | 411  | 441  | 45300000 | -0.17401 | 0.006811149 |
| chr15 | 45300001 | 45400000 | 527  | 549  | 45350000 | -0.13137 | 0.031138818 |
| chr15 | 45350001 | 45450000 | 834  | 866  | 45400000 | -0.12669 | 0.036088919 |
| chr15 | 45400001 | 45500000 | 992  | 1120 | 45450000 | -0.24746 | 0.000232804 |
| chr15 | 45450001 | 45550000 | 889  | 970  | 45500000 | -0.19817 | 0.002494925 |
| chr15 | 45600001 | 45700000 | 961  | 840  | 45650000 | 0.121775 | 0.042289199 |

|       |          |          |      |      |          |          |             |
|-------|----------|----------|------|------|----------|----------|-------------|
| chr15 | 45800001 | 45900000 | 835  | 865  | 45850000 | -0.1233  | 0.040067782 |
| chr15 | 46200001 | 46300000 | 1040 | 905  | 46250000 | 0.128222 | 0.034713544 |
| chr15 | 46350001 | 46450000 | 978  | 841  | 46400000 | 0.145357 | 0.019843332 |
| chr15 | 46950001 | 47050000 | 983  | 817  | 4.70E+07 | 0.194484 | 0.003011919 |
| chr15 | 47000001 | 47100000 | 1011 | 887  | 47050000 | 0.116405 | 0.049579273 |
| chr15 | 47650001 | 47750000 | 1019 | 1082 | 47700000 | -0.15892 | 0.012100823 |
| chr15 | 47900001 | 48000000 | 1086 | 1156 | 47950000 | -0.16249 | 0.010601078 |
| chr15 | 48600001 | 48700000 | 982  | 1024 | 48650000 | -0.13279 | 0.029756566 |
| chr15 | 49050001 | 49150000 | 1116 | 962  | 49100000 | 0.141856 | 0.022336467 |
| chr15 | 49200001 | 49300000 | 934  | 965  | 49250000 | -0.11948 | 0.04496002  |
| chr15 | 49750001 | 49850000 | 825  | 721  | 49800000 | 0.122023 | 0.041975077 |
| chr15 | 50150001 | 50250000 | 1087 | 949  | 50200000 | 0.1235   | 0.040141463 |
| chr15 | 50950001 | 51050000 | 787  | 681  | 5.10E+07 | 0.136337 | 0.026803967 |
| chr15 | 51050001 | 51150000 | 802  | 702  | 51100000 | 0.119759 | 0.044916622 |
| chr15 | 51100001 | 51200000 | 900  | 781  | 51150000 | 0.132231 | 0.030594097 |
| chr15 | 51900001 | 52000000 | 937  | 988  | 51950000 | -0.14883 | 0.017370858 |
| chr15 | 53000001 | 53100000 | 968  | 1020 | 53050000 | -0.14786 | 0.017969676 |
| chr15 | 53050001 | 53150000 | 896  | 1017 | 53100000 | -0.25512 | 0.000154862 |
| chr15 | 53100001 | 53200000 | 900  | 941  | 53150000 | -0.13664 | 0.026258868 |
| chr15 | 53550001 | 53650000 | 993  | 1030 | 53600000 | -0.12515 | 0.037852354 |
| chr15 | 53600001 | 53700000 | 978  | 1034 | 53650000 | -0.1527  | 0.015153857 |
| chr15 | 53750001 | 53850000 | 1018 | 892  | 53800000 | 0.11825  | 0.046968821 |
| chr15 | 53800001 | 53900000 | 1006 | 853  | 53850000 | 0.165641 | 0.009586212 |
| chr15 | 54250001 | 54350000 | 1062 | 925  | 54300000 | 0.126887 | 0.036183395 |
| chr15 | 54650001 | 54750000 | 1035 | 860  | 54700000 | 0.19485  | 0.002965118 |
| chr15 | 54700001 | 54800000 | 942  | 788  | 54750000 | 0.18516  | 0.004449143 |
| chr15 | 55050001 | 55150000 | 905  | 934  | 55100000 | -0.11788 | 0.047151141 |
| chr15 | 55200001 | 55300000 | 823  | 857  | 55250000 | -0.13077 | 0.031740103 |
| chr15 | 55250001 | 55350000 | 955  | 1016 | 55300000 | -0.1617  | 0.010917926 |
| chr15 | 55600001 | 55700000 | 867  | 759  | 55650000 | 0.11956  | 0.045183123 |
| chr15 | 55850001 | 55950000 | 868  | 895  | 55900000 | -0.11656 | 0.049009425 |
| chr15 | 56550001 | 56650000 | 855  | 892  | 56600000 | -0.13349 | 0.029094473 |
| chr15 | 56650001 | 56750000 | 911  | 799  | 56700000 | 0.116884 | 0.048891235 |
| chr15 | 56700001 | 56800000 | 983  | 841  | 56750000 | 0.152714 | 0.015367086 |
| chr15 | 56900001 | 57000000 | 981  | 851  | 56950000 | 0.132722 | 0.03011814  |
| chr15 | 57150001 | 57250000 | 977  | 845  | 57200000 | 0.137035 | 0.026200243 |
| chr15 | 57200001 | 57300000 | 977  | 848  | 57250000 | 0.131923 | 0.030895653 |
| chr15 | 57250001 | 57350000 | 982  | 851  | 57300000 | 0.134192 | 0.028731508 |
| chr15 | 58000001 | 58100000 | 1041 | 877  | 58050000 | 0.17495  | 0.006702798 |
| chr15 | 58750001 | 58850000 | 1153 | 1004 | 58800000 | 0.127261 | 0.035765824 |
| chr15 | 58900001 | 59000000 | 1027 | 860  | 58950000 | 0.183656 | 0.004731364 |
| chr15 | 59250001 | 59350000 | 957  | 828  | 59300000 | 0.136516 | 0.026647851 |
| chr15 | 59300001 | 59400000 | 982  | 843  | 59350000 | 0.147819 | 0.018235476 |
| chr15 | 59450001 | 59550000 | 1045 | 898  | 59500000 | 0.146344 | 0.01918478  |
| chr15 | 59950001 | 60050000 | 960  | 817  | 6.00E+07 | 0.160327 | 0.011679514 |
| chr15 | 61250001 | 61350000 | 999  | 1033 | 61300000 | -0.12066 | 0.043402417 |
| chr15 | 62250001 | 62350000 | 917  | 802  | 62300000 | 0.120948 | 0.043352354 |

|       |          |          |      |      |          |          |             |
|-------|----------|----------|------|------|----------|----------|-------------|
| chr15 | 62400001 | 62500000 | 976  | 1016 | 62450000 | -0.13032 | 0.032202574 |
| chr15 | 62450001 | 62550000 | 982  | 1017 | 62500000 | -0.1229  | 0.040558136 |
| chr15 | 62550001 | 62650000 | 865  | 901  | 62600000 | -0.1312  | 0.0313143   |
| chr15 | 62600001 | 62700000 | 908  | 1015 | 62650000 | -0.23309 | 0.000486187 |
| chr15 | 62650001 | 62750000 | 1006 | 1057 | 62700000 | -0.14372 | 0.020725926 |
| chr15 | 62700001 | 62800000 | 1004 | 1042 | 62750000 | -0.12597 | 0.036908461 |
| chr15 | 62750001 | 62850000 | 995  | 1026 | 62800000 | -0.11663 | 0.048909316 |
| chr15 | 63150001 | 63250000 | 1041 | 1085 | 63200000 | -0.1321  | 0.030428516 |
| chr15 | 63350001 | 63450000 | 940  | 821  | 63400000 | 0.122907 | 0.040870104 |
| chr15 | 63400001 | 63500000 | 1000 | 833  | 63450000 | 0.19124  | 0.003455699 |
| chr15 | 63800001 | 63900000 | 1063 | 924  | 63850000 | 0.129805 | 0.033035186 |
| chr15 | 63850001 | 63950000 | 972  | 851  | 63900000 | 0.119425 | 0.045364451 |
| chr15 | 64200001 | 64300000 | 919  | 989  | 64250000 | -0.17828 | 0.005747823 |
| chr15 | 64250001 | 64350000 | 978  | 1019 | 64300000 | -0.13162 | 0.03089669  |
| chr15 | 64500001 | 64600000 | 916  | 789  | 64550000 | 0.142951 | 0.02153019  |
| chr15 | 64550001 | 64650000 | 787  | 673  | 64600000 | 0.153385 | 0.015005666 |
| chr15 | 64800001 | 64900000 | 911  | 739  | 64850000 | 0.229505 | 0.000607539 |
| chr15 | 64850001 | 64950000 | 904  | 729  | 64900000 | 0.238032 | 0.000398321 |
| chr15 | 65200001 | 65300000 | 923  | 962  | 65250000 | -0.13208 | 0.030446775 |
| chr15 | 65350001 | 65450000 | 913  | 964  | 65400000 | -0.15079 | 0.016217058 |
| chr15 | 65550001 | 65650000 | 903  | 933  | 65600000 | -0.11952 | 0.044900065 |
| chr15 | 65600001 | 65700000 | 914  | 989  | 65650000 | -0.18615 | 0.004166632 |
| chr15 | 65700001 | 65800000 | 876  | 753  | 65750000 | 0.145909 | 0.019472436 |
| chr15 | 65750001 | 65850000 | 827  | 715  | 65800000 | 0.137572 | 0.025743938 |
| chr15 | 66200001 | 66300000 | 1102 | 1168 | 66250000 | -0.15629 | 0.013320456 |
| chr15 | 66350001 | 66450000 | 1091 | 1150 | 66400000 | -0.14835 | 0.017663992 |
| chr15 | 66400001 | 66500000 | 1101 | 1145 | 66450000 | -0.1289  | 0.033674334 |
| chr15 | 66550001 | 66650000 | 930  | 812  | 66600000 | 0.123379 | 0.040289121 |
| chr15 | 66600001 | 66700000 | 843  | 716  | 66650000 | 0.163201 | 0.010502412 |
| chr15 | 66900001 | 67000000 | 1034 | 1100 | 66950000 | -0.16164 | 0.010942513 |
| chr15 | 67150001 | 67250000 | 1055 | 1090 | 67200000 | -0.11946 | 0.044988552 |
| chr15 | 67350001 | 67450000 | 1065 | 1098 | 67400000 | -0.1164  | 0.049251555 |
| chr15 | 68050001 | 68150000 | 1093 | 1134 | 68100000 | -0.1255  | 0.037447455 |
| chr15 | 68650001 | 68750000 | 1070 | 1122 | 68700000 | -0.14083 | 0.022848022 |
| chr15 | 68700001 | 68800000 | 1071 | 1133 | 68750000 | -0.15356 | 0.014695678 |
| chr15 | 68850001 | 68950000 | 1080 | 1142 | 68900000 | -0.1529  | 0.015045348 |
| chr15 | 69050001 | 69150000 | 941  | 975  | 69100000 | -0.12358 | 0.039722401 |
| chr15 | 69750001 | 69850000 | 1008 | 1079 | 69800000 | -0.17057 | 0.007792318 |
| chr15 | 69950001 | 70050000 | 1061 | 1116 | 7.00E+07 | -0.14528 | 0.019644245 |
| chr15 | 70000001 | 70100000 | 966  | 1053 | 70050000 | -0.19678 | 0.002650909 |
| chr15 | 70050001 | 70150000 | 1035 | 1103 | 70100000 | -0.16417 | 0.009951711 |
| chr15 | 70300001 | 70400000 | 1121 | 1202 | 70350000 | -0.17302 | 0.007081466 |
| chr15 | 70350001 | 70450000 | 1097 | 1193 | 70400000 | -0.1934  | 0.003067356 |
| chr15 | 70400001 | 70500000 | 1080 | 1136 | 70450000 | -0.1453  | 0.01963133  |
| chr15 | 70500001 | 70600000 | 1132 | 1198 | 70550000 | -0.15413 | 0.014401286 |
| chr15 | 70550001 | 70650000 | 1126 | 1188 | 70600000 | -0.1497  | 0.016851697 |
| chr15 | 70700001 | 70800000 | 1118 | 1189 | 70750000 | -0.1612  | 0.011122512 |

|       |          |          |      |      |          |          |             |
|-------|----------|----------|------|------|----------|----------|-------------|
| chr15 | 70750001 | 70850000 | 1123 | 1202 | 70800000 | -0.17045 | 0.007828756 |
| chr15 | 70800001 | 70900000 | 1080 | 1193 | 70850000 | -0.21593 | 0.001115734 |
| chr15 | 70850001 | 70950000 | 1020 | 1074 | 70900000 | -0.1468  | 0.018646337 |
| chr15 | 71000001 | 71100000 | 956  | 823  | 71050000 | 0.143746 | 0.020959289 |
| chr15 | 71400001 | 71500000 | 928  | 1021 | 71450000 | -0.21016 | 0.001458528 |
| chr15 | 71450001 | 71550000 | 938  | 1005 | 71500000 | -0.17191 | 0.007397339 |
| chr15 | 71750001 | 71850000 | 1070 | 929  | 71800000 | 0.131489 | 0.031324544 |
| chr15 | 72050001 | 72150000 | 936  | 970  | 72100000 | -0.12385 | 0.039397337 |
| chr15 | 72300001 | 72400000 | 832  | 886  | 72350000 | -0.16309 | 0.010363407 |
| chr15 | 72400001 | 72500000 | 912  | 959  | 72450000 | -0.14487 | 0.019926135 |
| chr15 | 72450001 | 72550000 | 946  | 1030 | 72500000 | -0.1951  | 0.002850812 |
| chr15 | 72500001 | 72600000 | 988  | 1067 | 72550000 | -0.18335 | 0.004677605 |
| chr15 | 72750001 | 72850000 | 1005 | 849  | 72800000 | 0.170987 | 0.007819876 |
| chr15 | 72800001 | 72900000 | 1029 | 902  | 72850000 | 0.117672 | 0.04777489  |
| chr15 | 72900001 | 73000000 | 423  | 444  | 72950000 | -0.14227 | 0.02176616  |
| chr15 | 73150001 | 73250000 | 1067 | 936  | 73200000 | 0.116608 | 0.04928683  |
| chr15 | 73600001 | 73700000 | 1109 | 1232 | 73650000 | -0.22411 | 0.000755723 |
| chr15 | 74000001 | 74100000 | 1123 | 1218 | 74050000 | -0.18953 | 0.003616725 |
| chr15 | 74050001 | 74150000 | 1170 | 1225 | 74100000 | -0.13864 | 0.024578946 |
| chr15 | 74100001 | 74200000 | 1128 | 1163 | 74150000 | -0.11646 | 0.049165836 |
| chr15 | 74150001 | 74250000 | 1128 | 1177 | 74200000 | -0.13372 | 0.028881067 |
| chr15 | 74350001 | 74450000 | 433  | 481  | 74400000 | -0.22404 | 0.000758396 |
| chr15 | 74400001 | 74500000 | 941  | 985  | 74450000 | -0.1383  | 0.024860967 |
| chr15 | 74500001 | 74600000 | 1081 | 1193 | 74550000 | -0.2146  | 0.001187641 |
| chr15 | 74550001 | 74650000 | 1082 | 1220 | 74600000 | -0.24555 | 0.000257233 |
| chr15 | 74600001 | 74700000 | 1015 | 1116 | 74650000 | -0.20923 | 0.001521887 |
| chr15 | 74650001 | 74750000 | 1045 | 1191 | 74700000 | -0.26104 | 0.000112207 |
| chr15 | 74700001 | 74800000 | 950  | 1079 | 74750000 | -0.25607 | 0.000147151 |
| chr15 | 75000001 | 75100000 | 949  | 985  | 75050000 | -0.12609 | 0.036771934 |
| chr15 | 75050001 | 75150000 | 999  | 1102 | 75100000 | -0.21394 | 0.001224728 |
| chr15 | 75100001 | 75200000 | 932  | 1003 | 75150000 | -0.17829 | 0.005744571 |
| chr15 | 75400001 | 75500000 | 850  | 1005 | 75450000 | -0.31403 | 4.77E-06    |
| chr15 | 75450001 | 75550000 | 838  | 1030 | 75500000 | -0.36999 | 1.00E-07    |
| chr15 | 75500001 | 75600000 | 405  | 467  | 75550000 | -0.27787 | 4.34E-05    |
| chr15 | 75900001 | 76000000 | 798  | 881  | 75950000 | -0.21513 | 0.001158834 |
| chr15 | 75950001 | 76050000 | 727  | 830  | 7.60E+07 | -0.26353 | 9.78E-05    |
| chr15 | 76000001 | 76100000 | 577  | 609  | 76050000 | -0.15024 | 0.016533068 |
| chr15 | 76250001 | 76350000 | 906  | 771  | 76300000 | 0.160408 | 0.011644467 |
| chr15 | 76450001 | 76550000 | 1029 | 1061 | 76500000 | -0.11655 | 0.049025198 |
| chr15 | 76650001 | 76750000 | 914  | 955  | 76700000 | -0.13568 | 0.027100102 |
| chr15 | 77300001 | 77400000 | 1004 | 1047 | 77350000 | -0.13287 | 0.029678782 |
| chr15 | 77450001 | 77550000 | 958  | 812  | 77500000 | 0.166174 | 0.009395544 |
| chr15 | 77600001 | 77700000 | 1014 | 851  | 77650000 | 0.180455 | 0.005386049 |
| chr15 | 77650001 | 77750000 | 1019 | 889  | 77700000 | 0.124527 | 0.038905742 |
| chr15 | 77800001 | 77900000 | 1113 | 1179 | 77850000 | -0.15548 | 0.013714835 |
| chr15 | 77850001 | 77950000 | 1140 | 1266 | 77900000 | -0.22362 | 0.000774175 |
| chr15 | 77900001 | 78000000 | 1171 | 1401 | 77950000 | -0.33109 | 1.55E-06    |

|       |          |          |      |      |          |          |             |
|-------|----------|----------|------|------|----------|----------|-------------|
| chr15 | 77950001 | 78050000 | 1193 | 1330 | 7.80E+07 | -0.2292  | 0.000589489 |
| chr15 | 78000001 | 78100000 | 1148 | 1216 | 78050000 | -0.15539 | 0.013759268 |
| chr15 | 78050001 | 78150000 | 1101 | 1145 | 78100000 | -0.1289  | 0.033674334 |
| chr15 | 78150001 | 78250000 | 404  | 423  | 78200000 | -0.13867 | 0.024555187 |
| chr15 | 78250001 | 78350000 | 787  | 817  | 78300000 | -0.12634 | 0.036480251 |
| chr15 | 78550001 | 78650000 | 1026 | 1107 | 78600000 | -0.182   | 0.004944075 |
| chr15 | 78600001 | 78700000 | 925  | 1012 | 78650000 | -0.20206 | 0.002102555 |
| chr15 | 79000001 | 79100000 | 435  | 480  | 79050000 | -0.21439 | 0.001199247 |
| chr15 | 79050001 | 79150000 | 686  | 709  | 79100000 | -0.11995 | 0.044331986 |
| chr15 | 79200001 | 79300000 | 966  | 1035 | 79250000 | -0.17191 | 0.007397339 |
| chr15 | 79250001 | 79350000 | 1059 | 1106 | 79300000 | -0.13502 | 0.02768747  |
| chr15 | 79300001 | 79400000 | 1141 | 1221 | 79350000 | -0.17014 | 0.007924777 |
| chr15 | 79350001 | 79450000 | 1104 | 1149 | 79400000 | -0.13001 | 0.032519234 |
| chr15 | 80700001 | 80800000 | 1143 | 1189 | 80750000 | -0.1293  | 0.033262839 |
| chr15 | 81050001 | 81150000 | 1077 | 1123 | 81100000 | -0.13271 | 0.029834251 |
| chr15 | 81100001 | 81200000 | 1084 | 1138 | 81150000 | -0.14251 | 0.021594692 |
| chr15 | 81550001 | 81650000 | 1099 | 1136 | 81600000 | -0.12014 | 0.044074664 |
| chr15 | 82550001 | 82650000 | 207  | 169  | 82600000 | 0.220236 | 0.000947617 |
| chr15 | 82650001 | 82750000 | 5    | 2    | 82700000 | 1.249556 | 2.09E-53    |
| chr15 | 82700001 | 82800000 | 4    | 3    | 82750000 | 0.342666 | 8.12E-07    |
| chr15 | 82750001 | 82850000 | 0    | 1    | 82800000 | #NAME?   | 1.59E-189   |
| chr15 | 82850001 | 82950000 | 0    | 1    | 82900000 | #NAME?   | 1.59E-189   |
| chr15 | 82900001 | 83000000 | 1    | 2    | 82950000 | -1.07237 | 8.26E-44    |
| chr15 | 82950001 | 83050000 | 3    | 5    | 8.30E+07 | -0.80934 | 7.76E-28    |
| chr15 | 83000001 | 83100000 | 4    | 5    | 83050000 | -0.3943  | 1.58E-08    |
| chr15 | 83050001 | 83150000 | 2    | 3    | 83100000 | -0.65733 | 1.11E-19    |
| chr15 | 83100001 | 83200000 | 0    | 5    | 83150000 | #NAME?   | 1.59E-189   |
| chr15 | 83200001 | 83300000 | 801  | 829  | 83250000 | -0.12194 | 0.041750936 |
| chr15 | 83500001 | 83600000 | 1037 | 904  | 83550000 | 0.125649 | 0.037590593 |
| chr15 | 84500001 | 84600000 | 984  | 848  | 84550000 | 0.142222 | 0.022064075 |
| chr15 | 84700001 | 84800000 | 588  | 504  | 84750000 | 0.150021 | 0.016892961 |
| chr15 | 84750001 | 84850000 | 382  | 312  | 84800000 | 0.219655 | 0.000973903 |
| chr15 | 84900001 | 85000000 | 80   | 68   | 84950000 | 0.162093 | 0.01094313  |
| chr15 | 84950001 | 85050000 | 31   | 27   | 8.50E+07 | 0.126937 | 0.036127101 |
| chr15 | 85150001 | 85250000 | 946  | 828  | 85200000 | 0.119838 | 0.044812284 |
| chr15 | 85400001 | 85500000 | 973  | 1017 | 85450000 | -0.13618 | 0.026659399 |
| chr15 | 85750001 | 85850000 | 279  | 293  | 85800000 | -0.14301 | 0.021231997 |
| chr15 | 86300001 | 86400000 | 861  | 916  | 86350000 | -0.16171 | 0.010915245 |
| chr15 | 87150001 | 87250000 | 1070 | 937  | 87200000 | 0.119118 | 0.045779679 |
| chr15 | 87950001 | 88050000 | 995  | 873  | 8.80E+07 | 0.116343 | 0.049669144 |
| chr15 | 88200001 | 88300000 | 1100 | 956  | 88250000 | 0.130049 | 0.032782393 |
| chr15 | 88700001 | 88800000 | 1161 | 1212 | 88750000 | -0.13439 | 0.028257286 |
| chr15 | 88750001 | 88850000 | 1136 | 1195 | 88800000 | -0.14542 | 0.019553086 |
| chr15 | 89500001 | 89600000 | 849  | 742  | 89550000 | 0.121974 | 0.042037675 |
| chr15 | 89800001 | 89900000 | 944  | 1012 | 89850000 | -0.17272 | 0.007165289 |
| chr15 | 89850001 | 89950000 | 1040 | 1142 | 89900000 | -0.20735 | 0.001657754 |
| chr15 | 89900001 | 90000000 | 1068 | 1206 | 89950000 | -0.24769 | 0.000229989 |



|       |          |          |      |      |           |          |             |
|-------|----------|----------|------|------|-----------|----------|-------------|
| chr15 | 89950001 | 90050000 | 1067 | 1201 | 9.00E+07  | -0.24305 | 0.000292986 |
| chr15 | 90000001 | 90100000 | 968  | 1035 | 90050000  | -0.16892 | 0.008304716 |
| chr15 | 90250001 | 90350000 | 963  | 1066 | 90300000  | -0.21897 | 0.000966829 |
| chr15 | 90300001 | 90400000 | 971  | 1035 | 90350000  | -0.16446 | 0.009845171 |
| chr15 | 90700001 | 90800000 | 890  | 931  | 90750000  | -0.13735 | 0.025656137 |
| chr15 | 90900001 | 91000000 | 959  | 835  | 90950000  | 0.127383 | 0.035631433 |
| chr15 | 91350001 | 91450000 | 934  | 992  | 91400000  | -0.15929 | 0.011936805 |
| chr15 | 91400001 | 91500000 | 998  | 1102 | 91450000  | -0.21538 | 0.001144868 |
| chr15 | 91450001 | 91550000 | 969  | 1036 | 91500000  | -0.16883 | 0.008335592 |
| chr15 | 91600001 | 91700000 | 1026 | 856  | 91650000  | 0.188976 | 0.003799429 |
| chr15 | 91650001 | 91750000 | 1015 | 865  | 91700000  | 0.158336 | 0.012560501 |
| chr15 | 91750001 | 91850000 | 1019 | 1069 | 91800000  | -0.14148 | 0.0223573   |
| chr15 | 92400001 | 92500000 | 1041 | 1097 | 92450000  | -0.14797 | 0.017905222 |
| chr15 | 92600001 | 92700000 | 1035 | 1068 | 92650000  | -0.11765 | 0.047464141 |
| chr15 | 92700001 | 92800000 | 1023 | 873  | 92750000  | 0.156381 | 0.013481393 |
| chr15 | 93650001 | 93750000 | 950  | 1050 | 93700000  | -0.21676 | 0.001073217 |
| chr15 | 93700001 | 93800000 | 941  | 994  | 93750000  | -0.15142 | 0.015858185 |
| chr15 | 93850001 | 93950000 | 878  | 914  | 93900000  | -0.13034 | 0.032176149 |
| chr15 | 94250001 | 94350000 | 855  | 913  | 94300000  | -0.16706 | 0.008919149 |
| chr15 | 94300001 | 94400000 | 936  | 970  | 94350000  | -0.12385 | 0.039397337 |
| chr15 | 94400001 | 94500000 | 1071 | 928  | 94450000  | 0.13439  | 0.028548973 |
| chr15 | 94950001 | 95050000 | 1000 | 1032 | 9.50E+07  | -0.11781 | 0.047237358 |
| chr15 | 95650001 | 95750000 | 1008 | 871  | 95700000  | 0.138379 | 0.025070667 |
| chr15 | 95750001 | 95850000 | 1080 | 900  | 95800000  | 0.190663 | 0.003540577 |
| chr15 | 96000001 | 96100000 | 1069 | 923  | 96050000  | 0.139488 | 0.024170149 |
| chr15 | 96050001 | 96150000 | 1094 | 945  | 96100000  | 0.138855 | 0.024680917 |
| chr15 | 96100001 | 96200000 | 1126 | 956  | 96150000  | 0.163753 | 0.010288943 |
| chr15 | 96250001 | 96350000 | 1062 | 914  | 96300000  | 0.144146 | 0.020677598 |
| chr15 | 98100001 | 98200000 | 974  | 845  | 98150000  | 0.132599 | 0.03023721  |
| chr15 | 98350001 | 98450000 | 1113 | 971  | 98400000  | 0.124539 | 0.038891885 |
| chr15 | 98450001 | 98550000 | 992  | 1031 | 98500000  | -0.128   | 0.034640416 |
| chr15 | 98650001 | 98750000 | 1176 | 968  | 98700000  | 0.208437 | 0.001632908 |
| chr15 | 98700001 | 98800000 | 1094 | 943  | 98750000  | 0.141911 | 0.022295457 |
| chr15 | 98750001 | 98850000 | 971  | 1011 | 98800000  | -0.13061 | 0.031904966 |
| chr15 | 98800001 | 98900000 | 964  | 1022 | 98850000  | -0.15666 | 0.013140755 |
| chr15 | 99650001 | 99750000 | 1000 | 1050 | 99700000  | -0.14276 | 0.02141004  |
| chr15 | 99700001 | 99800000 | 895  | 969  | 99750000  | -0.18698 | 0.004024614 |
| chr15 | 99850001 | 99950000 | 920  | 973  | 99900000  | -0.15318 | 0.014898566 |
| chr15 | 1.01E+08 | 1.01E+08 | 873  | 951  | 100650000 | -0.19584 | 0.002762061 |
| chr15 | 1.01E+08 | 1.01E+08 | 1014 | 1090 | 100700000 | -0.17664 | 0.006136625 |
| chr15 | 1.01E+08 | 1.01E+08 | 1004 | 1079 | 100750000 | -0.17631 | 0.006219075 |
| chr15 | 1.01E+08 | 1.01E+08 | 1023 | 1059 | 100800000 | -0.12227 | 0.041339819 |
| chr15 | 1.01E+08 | 1.01E+08 | 962  | 838  | 100900000 | 0.126715 | 0.036376212 |
| chr15 | 1.01E+08 | 1.01E+08 | 792  | 659  | 100950000 | 0.19285  | 0.003228502 |
| chr15 | 1.01E+08 | 1.02E+08 | 1060 | 1105 | 101450000 | -0.13235 | 0.03017875  |
| chr15 | 1.02E+08 | 1.02E+08 | 1039 | 1091 | 101600000 | -0.14283 | 0.021362104 |
| chr15 | 1.02E+08 | 1.02E+08 | 936  | 983  | 101750000 | -0.14305 | 0.021197905 |

|       |          |          |      |      |           |          |             |
|-------|----------|----------|------|------|-----------|----------|-------------|
| chr15 | 1.02E+08 | 1.02E+08 | 1050 | 1108 | 1.02E+08  | -0.14994 | 0.016709877 |
| chr15 | 1.02E+08 | 1.02E+08 | 1078 | 1155 | 102050000 | -0.17191 | 0.007397339 |
| chr15 | 1.02E+08 | 1.02E+08 | 1002 | 1038 | 102100000 | -0.1233  | 0.040067782 |
| chr15 | 1.02E+08 | 1.02E+08 | 880  | 914  | 102150000 | -0.12706 | 0.035674574 |
| chr15 | 1.02E+08 | 1.02E+08 | 923  | 966  | 102200000 | -0.13806 | 0.025056274 |
| chr15 | 1.02E+08 | 1.03E+08 | 11   | 17   | 102500000 | -0.7004  | 6.93E-22    |
| chr15 | 1.03E+08 | 1.03E+08 | 4    | 10   | 102550000 | -1.3943  | 1.23E-64    |
| chrX  | 2600001  | 2700000  | 9    | 3    | 2650000   | 1.512591 | 1.57E-69    |
| chrX  | 3150001  | 3250000  | 853  | 890  | 3200000   | -0.13363 | 0.028962973 |
| chrX  | 3400001  | 3500000  | 764  | 657  | 3450000   | 0.145307 | 0.019876793 |
| chrX  | 3550001  | 3650000  | 731  | 762  | 3600000   | -0.13229 | 0.030239315 |
| chrX  | 3600001  | 3700000  | 729  | 762  | 3650000   | -0.13624 | 0.026603395 |
| chrX  | 3650001  | 3750000  | 654  | 710  | 3700000   | -0.1909  | 0.003412769 |
| chrX  | 3700001  | 3800000  | 292  | 347  | 3750000   | -0.32134 | 2.97E-06    |
| chrX  | 3750001  | 3850000  | 1    | 2    | 3800000   | -1.07237 | 8.26E-44    |
| chrX  | 5400001  | 5500000  | 926  | 959  | 5450000   | -0.12289 | 0.040565701 |
| chrX  | 5650001  | 5750000  | 950  | 810  | 5700000   | 0.157634 | 0.012884707 |
| chrX  | 5700001  | 5800000  | 957  | 839  | 5750000   | 0.117476 | 0.048049932 |
| chrX  | 6400001  | 6500000  | 904  | 747  | 6450000   | 0.202843 | 0.002095736 |
| chrX  | 7950001  | 8050000  | 925  | 982  | 8.00E+06  | -0.15864 | 0.012224421 |
| chrX  | 8100001  | 8200000  | 748  | 771  | 8150000   | -0.11606 | 0.049732869 |
| chrX  | 8650001  | 8750000  | 733  | 851  | 8700000   | -0.28772 | 2.43E-05    |
| chrX  | 8700001  | 8800000  | 699  | 810  | 8750000   | -0.285   | 2.86E-05    |
| chrX  | 9050001  | 9150000  | 976  | 1021 | 9100000   | -0.1374  | 0.025610541 |
| chrX  | 9100001  | 9200000  | 934  | 985  | 9150000   | -0.14907 | 0.017226122 |
| chrX  | 9350001  | 9450000  | 817  | 849  | 9400000   | -0.1278  | 0.03486215  |
| chrX  | 9600001  | 9700000  | 968  | 1001 | 9650000   | -0.12073 | 0.043299023 |
| chrX  | 9650001  | 9750000  | 948  | 998  | 9700000   | -0.14652 | 0.018822596 |
| chrX  | 9700001  | 9800000  | 879  | 948  | 9750000   | -0.1814  | 0.00506667  |
| chrX  | 9950001  | 10050000 | 939  | 1003 | 1.00E+07  | -0.1675  | 0.00877239  |
| chrX  | 10000001 | 10100000 | 1053 | 1101 | 10050000  | -0.13668 | 0.026225004 |
| chrX  | 10050001 | 10150000 | 1039 | 1100 | 10100000  | -0.15468 | 0.014117407 |
| chrX  | 10100001 | 10200000 | 965  | 1039 | 10150000  | -0.17897 | 0.005590636 |
| chrX  | 10700001 | 10800000 | 452  | 476  | 10750000  | -0.14701 | 0.018508722 |
| chrX  | 12550001 | 12650000 | 985  | 849  | 12600000  | 0.141987 | 0.022238641 |
| chrX  | 12600001 | 12700000 | 1039 | 872  | 12650000  | 0.180424 | 0.005392767 |
| chrX  | 13900001 | 14000000 | 953  | 827  | 13950000  | 0.132217 | 0.030607323 |
| chrX  | 14150001 | 14250000 | 919  | 799  | 14200000  | 0.129498 | 0.033355831 |
| chrX  | 14400001 | 14500000 | 1005 | 841  | 14450000  | 0.184646 | 0.004543793 |
| chrX  | 14450001 | 14550000 | 1018 | 856  | 14500000  | 0.177683 | 0.006016996 |
| chrX  | 14850001 | 14950000 | 1052 | 905  | 14900000  | 0.144773 | 0.020241779 |
| chrX  | 15600001 | 15700000 | 1048 | 915  | 15650000  | 0.123423 | 0.040235261 |
| chrX  | 15750001 | 15850000 | 926  | 767  | 15800000  | 0.199414 | 0.00243549  |
| chrX  | 15800001 | 15900000 | 968  | 843  | 15850000  | 0.127103 | 0.035942314 |
| chrX  | 16050001 | 16150000 | 1008 | 884  | 16100000  | 0.117006 | 0.04871733  |
| chrX  | 16550001 | 16650000 | 873  | 764  | 16600000  | 0.120037 | 0.044546888 |
| chrX  | 17200001 | 17300000 | 942  | 973  | 17250000  | -0.11908 | 0.045490786 |

|      |          |          |      |      |          |          |             |
|------|----------|----------|------|------|----------|----------|-------------|
| chrX | 17250001 | 17350000 | 893  | 951  | 17300000 | -0.16316 | 0.010339353 |
| chrX | 17350001 | 17450000 | 956  | 1039 | 17400000 | -0.19248 | 0.003190154 |
| chrX | 17400001 | 17500000 | 1001 | 1086 | 17450000 | -0.18995 | 0.003552273 |
| chrX | 17700001 | 17800000 | 1005 | 1042 | 17750000 | -0.12453 | 0.038580227 |
| chrX | 17850001 | 17950000 | 1046 | 1090 | 17900000 | -0.13182 | 0.030702143 |
| chrX | 17900001 | 18000000 | 1075 | 1116 | 17950000 | -0.12637 | 0.036448649 |
| chrX | 18400001 | 18500000 | 809  | 849  | 18450000 | -0.142   | 0.021970934 |
| chrX | 18700001 | 18800000 | 921  | 804  | 18750000 | 0.123634 | 0.039978758 |
| chrX | 18900001 | 19000000 | 950  | 983  | 18950000 | -0.12164 | 0.042139089 |
| chrX | 19900001 | 20000000 | 879  | 914  | 19950000 | -0.1287  | 0.033889151 |
| chrX | 20400001 | 20500000 | 993  | 1034 | 20450000 | -0.13074 | 0.03177263  |
| chrX | 20500001 | 20600000 | 1056 | 923  | 20550000 | 0.121836 | 0.042212726 |
| chrX | 20550001 | 20650000 | 1072 | 914  | 20600000 | 0.157667 | 0.0128692   |
| chrX | 20800001 | 20900000 | 839  | 882  | 20850000 | -0.14448 | 0.020193337 |
| chrX | 20850001 | 20950000 | 861  | 893  | 20900000 | -0.12502 | 0.038006375 |
| chrX | 21400001 | 21500000 | 1043 | 914  | 21450000 | 0.118101 | 0.047175255 |
| chrX | 21700001 | 21800000 | 989  | 1024 | 21750000 | -0.12255 | 0.040993897 |
| chrX | 22750001 | 22850000 | 994  | 848  | 22800000 | 0.15681  | 0.013274462 |
| chrX | 23700001 | 23800000 | 825  | 710  | 23750000 | 0.144203 | 0.020637392 |
| chrX | 23900001 | 24000000 | 866  | 725  | 23950000 | 0.184014 | 0.004662684 |
| chrX | 23950001 | 24050000 | 863  | 751  | 2.40E+07 | 0.128176 | 0.034763541 |
| chrX | 24000001 | 24100000 | 809  | 709  | 24050000 | 0.117982 | 0.047340823 |
| chrX | 24200001 | 24300000 | 906  | 783  | 24250000 | 0.138127 | 0.025279544 |
| chrX | 25300001 | 25400000 | 757  | 828  | 25350000 | -0.20171 | 0.002135146 |
| chrX | 25350001 | 25450000 | 793  | 867  | 25400000 | -0.20108 | 0.002195216 |
| chrX | 25400001 | 25500000 | 857  | 886  | 25450000 | -0.12038 | 0.043758585 |
| chrX | 25750001 | 25850000 | 969  | 802  | 25800000 | 0.200523 | 0.002320513 |
| chrX | 25800001 | 25900000 | 1070 | 913  | 25850000 | 0.156552 | 0.013398362 |
| chrX | 26000001 | 26100000 | 1005 | 865  | 26050000 | 0.144052 | 0.020743749 |
| chrX | 26250001 | 26350000 | 889  | 770  | 26300000 | 0.134953 | 0.028034729 |
| chrX | 26300001 | 26400000 | 859  | 713  | 26350000 | 0.196384 | 0.002776482 |
| chrX | 26350001 | 26450000 | 952  | 784  | 26400000 | 0.207736 | 0.00168529  |
| chrX | 26400001 | 26500000 | 1016 | 809  | 26450000 | 0.256317 | 0.000154393 |
| chrX | 26600001 | 26700000 | 999  | 875  | 26650000 | 0.11883  | 0.046171807 |
| chrX | 26800001 | 26900000 | 1014 | 883  | 26850000 | 0.127201 | 0.03583345  |
| chrX | 26950001 | 27050000 | 979  | 851  | 2.70E+07 | 0.129778 | 0.033063356 |
| chrX | 27000001 | 27100000 | 934  | 800  | 27050000 | 0.151051 | 0.016294619 |
| chrX | 27200001 | 27300000 | 965  | 797  | 27250000 | 0.203577 | 0.002028803 |
| chrX | 27250001 | 27350000 | 969  | 772  | 27300000 | 0.255524 | 0.000161064 |
| chrX | 27400001 | 27500000 | 969  | 839  | 27450000 | 0.135454 | 0.027583916 |
| chrX | 27450001 | 27550000 | 973  | 793  | 27500000 | 0.222747 | 0.000841331 |
| chrX | 27500001 | 27600000 | 977  | 808  | 27550000 | 0.201631 | 0.002210486 |
| chrX | 28200001 | 28300000 | 1016 | 854  | 28250000 | 0.178221 | 0.00588972  |
| chrX | 28250001 | 28350000 | 1041 | 905  | 28300000 | 0.129609 | 0.03323977  |
| chrX | 28750001 | 28850000 | 1068 | 878  | 28800000 | 0.210247 | 0.001504518 |
| chrX | 28800001 | 28900000 | 1061 | 864  | 28850000 | 0.22395  | 0.000794438 |
| chrX | 28850001 | 28950000 | 947  | 828  | 28900000 | 0.121362 | 0.04281764  |

|      |          |          |      |      |          |          |             |
|------|----------|----------|------|------|----------|----------|-------------|
| chrX | 28950001 | 29050000 | 988  | 858  | 2.90E+07 | 0.131162 | 0.031650847 |
| chrX | 29100001 | 29200000 | 952  | 782  | 29150000 | 0.211421 | 0.001426231 |
| chrX | 29150001 | 29250000 | 976  | 815  | 29200000 | 0.187709 | 0.004004968 |
| chrX | 29500001 | 29600000 | 1018 | 853  | 29550000 | 0.182748 | 0.004909367 |
| chrX | 29550001 | 29650000 | 984  | 818  | 29600000 | 0.194186 | 0.003050409 |
| chrX | 29600001 | 29700000 | 986  | 823  | 29650000 | 0.188323 | 0.00390412  |
| chrX | 30400001 | 30500000 | 1000 | 854  | 30450000 | 0.15532  | 0.014004992 |
| chrX | 30750001 | 30850000 | 982  | 1054 | 30800000 | -0.17445 | 0.006694014 |
| chrX | 30800001 | 30900000 | 1102 | 1157 | 30850000 | -0.14264 | 0.021500686 |
| chrX | 31250001 | 31350000 | 1087 | 911  | 31300000 | 0.182457 | 0.004967675 |
| chrX | 31300001 | 31400000 | 1004 | 860  | 31350000 | 0.150979 | 0.016335751 |
| chrX | 31950001 | 32050000 | 1101 | 950  | 3.20E+07 | 0.140443 | 0.023415615 |
| chrX | 32000001 | 32100000 | 1091 | 924  | 32050000 | 0.167315 | 0.00899893  |
| chrX | 32400001 | 32500000 | 1018 | 892  | 32450000 | 0.11825  | 0.046968821 |
| chrX | 32650001 | 32750000 | 1004 | 877  | 32700000 | 0.122739 | 0.04107835  |
| chrX | 33300001 | 33400000 | 1008 | 833  | 33350000 | 0.202735 | 0.002105677 |
| chrX | 33350001 | 33450000 | 993  | 871  | 33400000 | 0.116749 | 0.049083904 |
| chrX | 33550001 | 33650000 | 1013 | 878  | 33600000 | 0.13397  | 0.028937978 |
| chrX | 33600001 | 33700000 | 984  | 853  | 33650000 | 0.133741 | 0.029151481 |
| chrX | 33800001 | 33900000 | 1011 | 865  | 33850000 | 0.152639 | 0.015407727 |
| chrX | 34000001 | 34100000 | 1052 | 914  | 34050000 | 0.130497 | 0.032323091 |
| chrX | 34050001 | 34150000 | 1016 | 851  | 34100000 | 0.183298 | 0.004800916 |
| chrX | 34150001 | 34250000 | 981  | 823  | 34200000 | 0.180989 | 0.005271488 |
| chrX | 34200001 | 34300000 | 923  | 806  | 34250000 | 0.123179 | 0.040534457 |
| chrX | 34450001 | 34550000 | 944  | 824  | 34500000 | 0.123771 | 0.039812764 |
| chrX | 34650001 | 34750000 | 1094 | 923  | 34700000 | 0.172838 | 0.007279007 |
| chrX | 34850001 | 34950000 | 1013 | 829  | 34900000 | 0.216818 | 0.001112165 |
| chrX | 34900001 | 35000000 | 989  | 849  | 34950000 | 0.147834 | 0.018225669 |
| chrX | 34950001 | 35050000 | 983  | 856  | 3.50E+07 | 0.127209 | 0.035824221 |
| chrX | 35000001 | 35100000 | 1022 | 876  | 35050000 | 0.150021 | 0.016892961 |
| chrX | 35400001 | 35500000 | 1018 | 850  | 35450000 | 0.187831 | 0.003984795 |
| chrX | 35450001 | 35550000 | 982  | 813  | 35500000 | 0.200096 | 0.002364168 |
| chrX | 35800001 | 35900000 | 1039 | 895  | 35850000 | 0.142864 | 0.02159283  |
| chrX | 35850001 | 35950000 | 997  | 856  | 35900000 | 0.147611 | 0.01836668  |
| chrX | 35900001 | 36000000 | 994  | 819  | 35950000 | 0.207011 | 0.001741103 |
| chrX | 35950001 | 36050000 | 1031 | 889  | 3.60E+07 | 0.141417 | 0.022667267 |
| chrX | 36050001 | 36150000 | 994  | 855  | 36100000 | 0.14495  | 0.020120627 |
| chrX | 36100001 | 36200000 | 982  | 828  | 36150000 | 0.17372  | 0.007033129 |
| chrX | 36150001 | 36250000 | 960  | 803  | 36200000 | 0.185263 | 0.004430379 |
| chrX | 36200001 | 36300000 | 1005 | 841  | 36250000 | 0.184646 | 0.004543793 |
| chrX | 36450001 | 36550000 | 891  | 927  | 36500000 | -0.12952 | 0.033032037 |
| chrX | 36550001 | 36650000 | 995  | 842  | 36600000 | 0.168505 | 0.008600853 |
| chrX | 36600001 | 36700000 | 1020 | 851  | 36650000 | 0.188966 | 0.003801    |
| chrX | 38100001 | 38200000 | 923  | 958  | 38150000 | -0.12607 | 0.036795448 |
| chrX | 39300001 | 39400000 | 1125 | 1160 | 39350000 | -0.11657 | 0.048999121 |
| chrX | 39350001 | 39450000 | 1026 | 1131 | 39400000 | -0.21294 | 0.001282925 |
| chrX | 39400001 | 39500000 | 996  | 1031 | 39450000 | -0.1222  | 0.041427356 |

|      |          |          |      |      |          |          |             |
|------|----------|----------|------|------|----------|----------|-------------|
| chrX | 39500001 | 39600000 | 1066 | 1139 | 39550000 | -0.16793 | 0.008627206 |
| chrX | 39550001 | 39650000 | 1047 | 1164 | 39600000 | -0.2252  | 0.000716959 |
| chrX | 39600001 | 39700000 | 1015 | 1089 | 39650000 | -0.1739  | 0.006842364 |
| chrX | 39650001 | 39750000 | 965  | 1036 | 39700000 | -0.17479 | 0.006603821 |
| chrX | 39700001 | 39800000 | 950  | 1061 | 39750000 | -0.2318  | 0.000518482 |
| chrX | 39750001 | 39850000 | 953  | 1006 | 39800000 | -0.15045 | 0.016410474 |
| chrX | 39800001 | 39900000 | 955  | 986  | 39850000 | -0.11846 | 0.046344999 |
| chrX | 39950001 | 40050000 | 990  | 1051 | 4.00E+07 | -0.15863 | 0.012227749 |
| chrX | 40200001 | 40300000 | 965  | 1007 | 40250000 | -0.13383 | 0.028773364 |
| chrX | 40900001 | 41000000 | 896  | 779  | 40950000 | 0.129504 | 0.033349502 |
| chrX | 40950001 | 41050000 | 967  | 847  | 4.10E+07 | 0.118782 | 0.046237028 |
| chrX | 41150001 | 41250000 | 742  | 767  | 41200000 | -0.12018 | 0.04402722  |
| chrX | 42200001 | 42300000 | 905  | 933  | 42250000 | -0.11633 | 0.049345968 |
| chrX | 42750001 | 42850000 | 1070 | 887  | 42800000 | 0.198233 | 0.0025636   |
| chrX | 42800001 | 42900000 | 1073 | 865  | 42850000 | 0.238506 | 0.000388937 |
| chrX | 42850001 | 42950000 | 1028 | 848  | 42900000 | 0.205332 | 0.001876736 |
| chrX | 42900001 | 43000000 | 1068 | 922  | 42950000 | 0.139701 | 0.023999691 |
| chrX | 43150001 | 43250000 | 977  | 812  | 43200000 | 0.194507 | 0.003008902 |
| chrX | 43550001 | 43650000 | 947  | 1040 | 43600000 | -0.20752 | 0.001645159 |
| chrX | 43600001 | 43700000 | 998  | 1089 | 43650000 | -0.19826 | 0.002485027 |
| chrX | 43700001 | 43800000 | 909  | 955  | 43750000 | -0.14359 | 0.020814072 |
| chrX | 43750001 | 43850000 | 927  | 994  | 43800000 | -0.17305 | 0.007074274 |
| chrX | 44000001 | 44100000 | 1033 | 1074 | 44050000 | -0.12853 | 0.034078466 |
| chrX | 44050001 | 44150000 | 923  | 953  | 44100000 | -0.11852 | 0.046264399 |
| chrX | 44500001 | 44600000 | 847  | 738  | 44550000 | 0.126369 | 0.036766429 |
| chrX | 44700001 | 44800000 | 933  | 784  | 44750000 | 0.178652 | 0.005789412 |
| chrX | 44850001 | 44950000 | 912  | 753  | 44900000 | 0.204012 | 0.00199012  |
| chrX | 44900001 | 45000000 | 976  | 837  | 44950000 | 0.149282 | 0.017333669 |
| chrX | 45300001 | 45400000 | 1004 | 869  | 45350000 | 0.135959 | 0.027135259 |
| chrX | 45800001 | 45900000 | 944  | 802  | 45850000 | 0.162813 | 0.01065514  |
| chrX | 45950001 | 46050000 | 809  | 863  | 4.60E+07 | -0.16559 | 0.009432109 |
| chrX | 46450001 | 46550000 | 981  | 857  | 46500000 | 0.122586 | 0.041268226 |
| chrX | 46500001 | 46600000 | 949  | 803  | 46550000 | 0.168636 | 0.008557728 |
| chrX | 46850001 | 46950000 | 929  | 809  | 46900000 | 0.127167 | 0.03587058  |
| chrX | 46950001 | 47050000 | 873  | 907  | 4.70E+07 | -0.12749 | 0.035198953 |
| chrX | 47000001 | 47100000 | 982  | 1161 | 47050000 | -0.31394 | 4.79E-06    |
| chrX | 47050001 | 47150000 | 875  | 1036 | 47100000 | -0.31604 | 4.19E-06    |
| chrX | 47250001 | 47350000 | 877  | 769  | 47300000 | 0.117221 | 0.048410352 |
| chrX | 47350001 | 47450000 | 887  | 928  | 47400000 | -0.13756 | 0.025475046 |
| chrX | 47400001 | 47500000 | 996  | 1054 | 47450000 | -0.15403 | 0.014451361 |
| chrX | 47500001 | 47600000 | 960  | 841  | 47550000 | 0.118557 | 0.046545846 |
| chrX | 48100001 | 48200000 | 269  | 283  | 48150000 | -0.14557 | 0.0194538   |
| chrX | 48150001 | 48250000 | 155  | 187  | 48200000 | -0.34314 | 6.83E-07    |
| chrX | 48200001 | 48300000 | 92   | 128  | 48250000 | -0.54881 | 1.46E-14    |
| chrX | 48250001 | 48350000 | 486  | 579  | 48300000 | -0.32498 | 2.33E-06    |
| chrX | 48300001 | 48400000 | 963  | 1048 | 48350000 | -0.1944  | 0.002938312 |
| chrX | 48700001 | 48800000 | 732  | 801  | 48750000 | -0.20233 | 0.002077056 |

|      |          |          |      |      |          |          |             |
|------|----------|----------|------|------|----------|----------|-------------|
| chrX | 48750001 | 48850000 | 918  | 1043 | 48800000 | -0.25654 | 0.000143398 |
| chrX | 48800001 | 48900000 | 844  | 889  | 48850000 | -0.14731 | 0.0183162   |
| chrX | 48850001 | 48950000 | 784  | 853  | 48900000 | -0.19406 | 0.002981466 |
| chrX | 48900001 | 49000000 | 790  | 845  | 48950000 | -0.16947 | 0.008131424 |
| chrX | 48950001 | 49050000 | 797  | 852  | 4.90E+07 | -0.16865 | 0.008394083 |
| chrX | 49000001 | 49100000 | 944  | 1067 | 49050000 | -0.24907 | 0.000213825 |
| chrX | 49050001 | 49150000 | 1042 | 1204 | 49100000 | -0.28085 | 3.65E-05    |
| chrX | 49100001 | 49200000 | 668  | 798  | 49150000 | -0.32891 | 1.80E-06    |
| chrX | 49150001 | 49250000 | 143  | 184  | 49200000 | -0.43606 | 5.32E-10    |
| chrX | 49200001 | 49300000 | 2    | 3    | 49250000 | -0.65733 | 1.11E-19    |
| chrX | 49300001 | 49400000 | 186  | 215  | 49350000 | -0.28141 | 3.53E-05    |
| chrX | 49900001 | 50000000 | 798  | 696  | 49950000 | 0.12493  | 0.038429648 |
| chrX | 50750001 | 50850000 | 816  | 850  | 50800000 | -0.13127 | 0.031247765 |
| chrX | 50800001 | 50900000 | 878  | 923  | 50850000 | -0.14448 | 0.02019205  |
| chrX | 51200001 | 51300000 | 682  | 721  | 51250000 | -0.1526  | 0.015209194 |
| chrX | 51350001 | 51450000 | 593  | 520  | 51400000 | 0.117149 | 0.048513645 |
| chrX | 51650001 | 51750000 | 846  | 729  | 51700000 | 0.142367 | 0.021957038 |
| chrX | 51750001 | 51850000 | 392  | 415  | 51800000 | -0.15463 | 0.014142927 |
| chrX | 52100001 | 52200000 | 22   | 32   | 52150000 | -0.61294 | 1.65E-17    |
| chrX | 52450001 | 52550000 | 0    | 2    | 52500000 | #NAME?   | 1.59E-189   |
| chrX | 52500001 | 52600000 | 247  | 274  | 52550000 | -0.22204 | 0.000835289 |
| chrX | 52650001 | 52750000 | 166  | 140  | 52700000 | 0.173385 | 0.007125864 |
| chrX | 52900001 | 53000000 | 163  | 168  | 52950000 | -0.11596 | 0.049883408 |
| chrX | 53050001 | 53150000 | 942  | 974  | 53100000 | -0.12057 | 0.043518569 |
| chrX | 54350001 | 54450000 | 742  | 786  | 54400000 | -0.15548 | 0.013714835 |
| chrX | 55000001 | 55100000 | 886  | 915  | 55050000 | -0.11884 | 0.045827349 |
| chrX | 55050001 | 55150000 | 646  | 714  | 55100000 | -0.21676 | 0.001073217 |
| chrX | 55400001 | 55500000 | 621  | 532  | 55450000 | 0.150795 | 0.016441315 |
| chrX | 55600001 | 55700000 | 770  | 674  | 55650000 | 0.119738 | 0.044945141 |
| chrX | 55750001 | 55850000 | 767  | 811  | 55800000 | -0.15285 | 0.015075434 |
| chrX | 56400001 | 56500000 | 611  | 534  | 56450000 | 0.121961 | 0.042053787 |
| chrX | 56450001 | 56550000 | 702  | 609  | 56500000 | 0.132657 | 0.030180917 |
| chrX | 56500001 | 56600000 | 907  | 787  | 56550000 | 0.132367 | 0.030461342 |
| chrX | 56600001 | 56700000 | 683  | 726  | 56650000 | -0.16046 | 0.011433837 |
| chrX | 56750001 | 56850000 | 881  | 929  | 56800000 | -0.14891 | 0.017325614 |
| chrX | 56850001 | 56950000 | 729  | 605  | 56900000 | 0.196612 | 0.002749435 |
| chrX | 56900001 | 57000000 | 680  | 593  | 56950000 | 0.125131 | 0.038193576 |
| chrX | 57250001 | 57350000 | 828  | 726  | 57300000 | 0.117289 | 0.048314014 |
| chrX | 57800001 | 57900000 | 691  | 599  | 57850000 | 0.133758 | 0.029135444 |
| chrX | 58250001 | 58350000 | 1086 | 1135 | 58300000 | -0.13604 | 0.026781646 |
| chrX | 58400001 | 58500000 | 722  | 615  | 58450000 | 0.159041 | 0.012242221 |
| chrX | 58450001 | 58550000 | 493  | 412  | 58500000 | 0.186572 | 0.004198008 |
| chrX | 58500001 | 58600000 | 315  | 342  | 58550000 | -0.19102 | 0.003395995 |
| chrX | 58550001 | 58650000 | 180  | 197  | 58600000 | -0.20257 | 0.002054986 |
| chrX | 61600001 | 61700000 | 42   | 32   | 61650000 | 0.319946 | 3.65E-06    |
| chrX | 61950001 | 62050000 | 883  | 761  | 6.20E+07 | 0.142145 | 0.022121223 |
| chrX | 62000001 | 62100000 | 911  | 798  | 62050000 | 0.118691 | 0.046362393 |

|      |          |          |      |      |          |          |             |
|------|----------|----------|------|------|----------|----------|-------------|
| chrX | 62150001 | 62250000 | 876  | 726  | 62200000 | 0.19859  | 0.00252429  |
| chrX | 62250001 | 62350000 | 796  | 836  | 62300000 | -0.14311 | 0.021160785 |
| chrX | 62300001 | 62400000 | 379  | 400  | 62350000 | -0.15017 | 0.016573134 |
| chrX | 62650001 | 62750000 | 799  | 690  | 62700000 | 0.139227 | 0.02437905  |
| chrX | 63100001 | 63200000 | 807  | 858  | 63150000 | -0.16078 | 0.01129702  |
| chrX | 63150001 | 63250000 | 846  | 880  | 63200000 | -0.12922 | 0.033344189 |
| chrX | 63350001 | 63450000 | 888  | 930  | 63400000 | -0.13904 | 0.024256366 |
| chrX | 63550001 | 63650000 | 848  | 920  | 63600000 | -0.18994 | 0.003554155 |
| chrX | 63600001 | 63700000 | 792  | 856  | 63650000 | -0.18448 | 0.00446436  |
| chrX | 63650001 | 63750000 | 706  | 741  | 63700000 | -0.14218 | 0.021837386 |
| chrX | 64500001 | 64600000 | 804  | 703  | 64550000 | 0.121299 | 0.042898433 |
| chrX | 65000001 | 65100000 | 837  | 863  | 65050000 | -0.1165  | 0.049095354 |
| chrX | 65250001 | 65350000 | 804  | 866  | 65300000 | -0.17954 | 0.005462048 |
| chrX | 65750001 | 65850000 | 861  | 754  | 65800000 | 0.119077 | 0.045835479 |
| chrX | 65800001 | 65900000 | 1026 | 880  | 65850000 | 0.149084 | 0.017453561 |
| chrX | 66350001 | 66450000 | 730  | 799  | 66400000 | -0.20267 | 0.002045829 |
| chrX | 66750001 | 66850000 | 983  | 1020 | 66800000 | -0.12568 | 0.037241355 |
| chrX | 66850001 | 66950000 | 828  | 857  | 66900000 | -0.12204 | 0.041631538 |
| chrX | 66900001 | 67000000 | 952  | 1039 | 66950000 | -0.19853 | 0.002455843 |
| chrX | 66950001 | 67050000 | 937  | 967  | 6.70E+07 | -0.11784 | 0.047204033 |
| chrX | 67100001 | 67200000 | 805  | 701  | 67150000 | 0.127203 | 0.035831196 |
| chrX | 67150001 | 67250000 | 848  | 739  | 67200000 | 0.126118 | 0.037052355 |
| chrX | 67700001 | 67800000 | 800  | 683  | 67750000 | 0.155743 | 0.013794383 |
| chrX | 67850001 | 67950000 | 1075 | 1128 | 67900000 | -0.1418  | 0.022115563 |
| chrX | 67900001 | 68000000 | 988  | 1091 | 67950000 | -0.21544 | 0.00114189  |
| chrX | 67950001 | 68050000 | 875  | 923  | 6.80E+07 | -0.14942 | 0.017018303 |
| chrX | 68150001 | 68250000 | 1143 | 1182 | 68200000 | -0.12078 | 0.043244884 |
| chrX | 68200001 | 68300000 | 1108 | 1216 | 68250000 | -0.20656 | 0.001718436 |
| chrX | 68250001 | 68350000 | 1125 | 1160 | 68300000 | -0.11657 | 0.048999121 |
| chrX | 68350001 | 68450000 | 1138 | 1180 | 68400000 | -0.12466 | 0.03843051  |
| chrX | 68400001 | 68500000 | 1024 | 1138 | 68450000 | -0.22466 | 0.000736155 |
| chrX | 68450001 | 68550000 | 958  | 1140 | 68500000 | -0.32331 | 2.61E-06    |
| chrX | 68500001 | 68600000 | 948  | 1050 | 68550000 | -0.2198  | 0.000929416 |
| chrX | 68550001 | 68650000 | 903  | 974  | 68600000 | -0.18157 | 0.005031309 |
| chrX | 68750001 | 68850000 | 1049 | 1118 | 68800000 | -0.16428 | 0.009912983 |
| chrX | 68800001 | 68900000 | 946  | 1028 | 68850000 | -0.1923  | 0.003215443 |
| chrX | 68850001 | 68950000 | 802  | 833  | 68900000 | -0.12709 | 0.03564833  |
| chrX | 69650001 | 69750000 | 939  | 984  | 69700000 | -0.1399  | 0.023569515 |
| chrX | 70100001 | 70200000 | 798  | 669  | 70150000 | 0.182011 | 0.005058353 |
| chrX | 70150001 | 70250000 | 839  | 687  | 70200000 | 0.215989 | 0.001155883 |
| chrX | 70200001 | 70300000 | 885  | 766  | 70250000 | 0.135961 | 0.027133604 |
| chrX | 71100001 | 71200000 | 973  | 1011 | 71150000 | -0.12764 | 0.035033941 |
| chrX | 71150001 | 71250000 | 1087 | 1138 | 71200000 | -0.13852 | 0.024680722 |
| chrX | 71450001 | 71550000 | 922  | 956  | 71500000 | -0.12462 | 0.038480669 |
| chrX | 71550001 | 71650000 | 972  | 1027 | 71600000 | -0.15178 | 0.015658858 |
| chrX | 71950001 | 72050000 | 99   | 79   | 7.20E+07 | 0.253204 | 0.00018217  |
| chrX | 72000001 | 72100000 | 9    | 10   | 72050000 | -0.22437 | 0.000746269 |

|      |          |          |      |     |          |          |             |
|------|----------|----------|------|-----|----------|----------|-------------|
| chrX | 72050001 | 72150000 | 12   | 16  | 72100000 | -0.48741 | 5.63E-12    |
| chrX | 72100001 | 72200000 | 18   | 7   | 72150000 | 1.290198 | 6.40E-56    |
| chrX | 72150001 | 72250000 | 289  | 314 | 72200000 | -0.19207 | 0.003247572 |
| chrX | 72400001 | 72500000 | 895  | 758 | 72450000 | 0.167318 | 0.00899774  |
| chrX | 72800001 | 72900000 | 807  | 708 | 72850000 | 0.116448 | 0.04951811  |
| chrX | 73400001 | 73500000 | 983  | 854 | 73450000 | 0.130584 | 0.032234737 |
| chrX | 73450001 | 73550000 | 935  | 818 | 73500000 | 0.120494 | 0.043944676 |
| chrX | 74450001 | 74550000 | 610  | 510 | 74500000 | 0.18594  | 0.004308686 |
| chrX | 74700001 | 74800000 | 672  | 714 | 74750000 | -0.15983 | 0.011699331 |
| chrX | 74850001 | 74950000 | 681  | 702 | 74900000 | -0.11619 | 0.0495532   |
| chrX | 74900001 | 75000000 | 698  | 728 | 74950000 | -0.13308 | 0.029479581 |
| chrX | 75450001 | 75550000 | 599  | 657 | 75500000 | -0.20571 | 0.001785495 |
| chrX | 75550001 | 75650000 | 725  | 769 | 75600000 | -0.15737 | 0.012804318 |
| chrX | 75800001 | 75900000 | 675  | 703 | 75850000 | -0.13101 | 0.031504215 |
| chrX | 76100001 | 76200000 | 650  | 714 | 76150000 | -0.20786 | 0.001620156 |
| chrX | 76150001 | 76250000 | 765  | 790 | 76200000 | -0.11876 | 0.045925744 |
| chrX | 76300001 | 76400000 | 812  | 697 | 76350000 | 0.147949 | 0.018153332 |
| chrX | 76350001 | 76450000 | 734  | 635 | 76400000 | 0.136652 | 0.026530551 |
| chrX | 76750001 | 76850000 | 912  | 781 | 76800000 | 0.15134  | 0.016130219 |
| chrX | 76850001 | 76950000 | 986  | 807 | 76900000 | 0.216647 | 0.001121062 |
| chrX | 76900001 | 77000000 | 943  | 767 | 76950000 | 0.225659 | 0.000731909 |
| chrX | 77050001 | 77150000 | 739  | 605 | 77100000 | 0.216267 | 0.00114103  |
| chrX | 78000001 | 78100000 | 878  | 921 | 78050000 | -0.14135 | 0.022453516 |
| chrX | 78750001 | 78850000 | 863  | 906 | 78800000 | -0.14252 | 0.021583956 |
| chrX | 78850001 | 78950000 | 919  | 766 | 78900000 | 0.190349 | 0.003587526 |
| chrX | 79250001 | 79350000 | 958  | 807 | 79300000 | 0.175085 | 0.006667194 |
| chrX | 79300001 | 79400000 | 921  | 806 | 79350000 | 0.12005  | 0.044530573 |
| chrX | 79500001 | 79600000 | 905  | 768 | 79550000 | 0.16444  | 0.010028165 |
| chrX | 79900001 | 80000000 | 893  | 923 | 79950000 | -0.12004 | 0.044208174 |
| chrX | 80000001 | 80100000 | 863  | 718 | 80050000 | 0.193005 | 0.003207395 |
| chrX | 80250001 | 80350000 | 769  | 664 | 80300000 | 0.139429 | 0.024217346 |
| chrX | 80750001 | 80850000 | 1002 | 859 | 80800000 | 0.149781 | 0.01703501  |
| chrX | 81050001 | 81150000 | 908  | 787 | 81100000 | 0.133957 | 0.028949767 |
| chrX | 81550001 | 81650000 | 999  | 872 | 81600000 | 0.123785 | 0.039795791 |
| chrX | 81600001 | 81700000 | 952  | 835 | 81650000 | 0.116814 | 0.048991645 |
| chrX | 82600001 | 82700000 | 854  | 734 | 82650000 | 0.146084 | 0.019356162 |
| chrX | 82950001 | 83050000 | 790  | 820 | 8.30E+07 | -0.12614 | 0.036708599 |
| chrX | 83750001 | 83850000 | 863  | 890 | 83800000 | -0.11682 | 0.048647855 |
| chrX | 84000001 | 84100000 | 932  | 806 | 84050000 | 0.137178 | 0.026078133 |
| chrX | 84600001 | 84700000 | 917  | 780 | 84650000 | 0.161076 | 0.01136213  |
| chrX | 85450001 | 85550000 | 886  | 767 | 85500000 | 0.135708 | 0.027357397 |
| chrX | 85600001 | 85700000 | 898  | 767 | 85650000 | 0.155117 | 0.014107274 |
| chrX | 85650001 | 85750000 | 912  | 744 | 85700000 | 0.221359 | 0.000898618 |
| chrX | 86000001 | 86100000 | 1016 | 864 | 86050000 | 0.161425 | 0.011216647 |
| chrX | 86050001 | 86150000 | 909  | 796 | 86100000 | 0.11914  | 0.045749827 |
| chrX | 86250001 | 86350000 | 1024 | 898 | 86300000 | 0.117057 | 0.048644667 |
| chrX | 86400001 | 86500000 | 977  | 813 | 86450000 | 0.192731 | 0.003244784 |



|      |          |          |      |     |          |          |             |
|------|----------|----------|------|-----|----------|----------|-------------|
| chrX | 86450001 | 86550000 | 924  | 785 | 86500000 | 0.162828 | 0.010648979 |
| chrX | 87050001 | 87150000 | 897  | 736 | 87100000 | 0.21303  | 0.001324991 |
| chrX | 87100001 | 87200000 | 952  | 807 | 87150000 | 0.166021 | 0.009449915 |
| chrX | 87150001 | 87250000 | 948  | 821 | 87200000 | 0.135133 | 0.027872141 |
| chrX | 87500001 | 87600000 | 901  | 775 | 87550000 | 0.144959 | 0.020114214 |
| chrX | 87550001 | 87650000 | 923  | 807 | 87600000 | 0.12139  | 0.042781278 |
| chrX | 87750001 | 87850000 | 1002 | 856 | 87800000 | 0.154828 | 0.014253918 |
| chrX | 87800001 | 87900000 | 969  | 844 | 87850000 | 0.126882 | 0.036188801 |
| chrX | 88050001 | 88150000 | 908  | 796 | 88100000 | 0.117552 | 0.047943224 |
| chrX | 88100001 | 88200000 | 1010 | 870 | 88150000 | 0.142896 | 0.021569625 |
| chrX | 88150001 | 88250000 | 952  | 828 | 88200000 | 0.128959 | 0.033923634 |
| chrX | 88500001 | 88600000 | 65   | 69  | 88550000 | -0.15853 | 0.012275202 |
| chrX | 88700001 | 88800000 | 76   | 63  | 88750000 | 0.198276 | 0.002558852 |
| chrX | 88800001 | 88900000 | 88   | 93  | 88850000 | -0.1521  | 0.015482366 |
| chrX | 88850001 | 88950000 | 58   | 62  | 88900000 | -0.16859 | 0.008412954 |
| chrX | 88900001 | 89000000 | 136  | 143 | 88950000 | -0.14478 | 0.019986634 |
| chrX | 89000001 | 89100000 | 74   | 61  | 89050000 | 0.206344 | 0.001793847 |
| chrX | 89050001 | 89150000 | 70   | 56  | 89100000 | 0.249556 | 0.000220671 |
| chrX | 89100001 | 89200000 | 59   | 50  | 89150000 | 0.166415 | 0.009310497 |
| chrX | 89150001 | 89250000 | 54   | 56  | 89200000 | -0.12484 | 0.038217021 |
| chrX | 89250001 | 89350000 | 861  | 730 | 89300000 | 0.165745 | 0.009548722 |
| chrX | 89300001 | 89400000 | 500  | 426 | 89350000 | 0.158703 | 0.012393878 |
| chrX | 89400001 | 89500000 | 109  | 88  | 89450000 | 0.236381 | 0.000432678 |
| chrX | 89550001 | 89650000 | 69   | 73  | 89600000 | -0.15367 | 0.014637537 |
| chrX | 89600001 | 89700000 | 77   | 65  | 89650000 | 0.172047 | 0.007506069 |
| chrX | 89650001 | 89750000 | 79   | 54  | 89700000 | 0.476521 | 2.18E-11    |
| chrX | 89700001 | 89800000 | 84   | 62  | 89750000 | 0.365749 | 1.62E-07    |
| chrX | 89750001 | 89850000 | 92   | 65  | 89800000 | 0.428822 | 1.28E-09    |
| chrX | 89800001 | 89900000 | 107  | 90  | 89850000 | 0.177242 | 0.006123222 |
| chrX | 90000001 | 90100000 | 87   | 73  | 90050000 | 0.180747 | 0.005323075 |
| chrX | 90150001 | 90250000 | 71   | 45  | 90200000 | 0.585522 | 6.05E-16    |
| chrX | 90300001 | 90400000 | 928  | 809 | 90350000 | 0.125613 | 0.037632331 |
| chrX | 90350001 | 90450000 | 501  | 419 | 90400000 | 0.185489 | 0.004389462 |
| chrX | 90850001 | 90950000 | 80   | 84  | 90900000 | -0.14276 | 0.02141004  |
| chrX | 91000001 | 91100000 | 60   | 48  | 91050000 | 0.249556 | 0.000220671 |
| chrX | 91100001 | 91200000 | 61   | 52  | 91150000 | 0.157926 | 0.01274899  |
| chrX | 91150001 | 91250000 | 82   | 44  | 91200000 | 0.825749 | 4.35E-28    |
| chrX | 91200001 | 91300000 | 65   | 50  | 91250000 | 0.30614  | 8.72E-06    |
| chrX | 91250001 | 91350000 | 52   | 62  | 91300000 | -0.32613 | 2.16E-06    |
| chrX | 91300001 | 91400000 | 78   | 96  | 91350000 | -0.37193 | 8.66E-08    |
| chrX | 91650001 | 91750000 | 59   | 63  | 91700000 | -0.16701 | 0.008937407 |
| chrX | 91700001 | 91800000 | 70   | 54  | 91750000 | 0.302024 | 1.12E-05    |
| chrX | 91750001 | 91850000 | 64   | 53  | 91800000 | 0.199708 | 0.002404518 |
| chrX | 91800001 | 91900000 | 67   | 78  | 91850000 | -0.29168 | 1.92E-05    |
| chrX | 91850001 | 91950000 | 69   | 83  | 91900000 | -0.33889 | 9.15E-07    |
| chrX | 91950001 | 92050000 | 64   | 53  | 9.20E+07 | 0.199708 | 0.002404518 |
| chrX | 92000001 | 92100000 | 73   | 63  | 92050000 | 0.140173 | 0.023627054 |

|      |          |          |      |      |           |          |             |
|------|----------|----------|------|------|-----------|----------|-------------|
| chrX | 92100001 | 92200000 | 116  | 94   | 92150000  | 0.23102  | 0.000564147 |
| chrX | 92150001 | 92250000 | 101  | 74   | 92200000  | 0.376386 | 7.47E-08    |
| chrX | 92200001 | 92300000 | 72   | 62   | 92250000  | 0.143357 | 0.021237053 |
| chrX | 92300001 | 92400000 | 315  | 275  | 92350000  | 0.123548 | 0.040082672 |
| chrX | 92450001 | 92550000 | 1002 | 874  | 92500000  | 0.124806 | 0.03857587  |
| chrX | 92500001 | 92600000 | 973  | 826  | 92550000  | 0.163926 | 0.010222463 |
| chrX | 92550001 | 92650000 | 981  | 836  | 92600000  | 0.158378 | 0.012541103 |
| chrX | 93000001 | 93100000 | 1018 | 880  | 93050000  | 0.13779  | 0.025560529 |
| chrX | 93050001 | 93150000 | 1015 | 874  | 93100000  | 0.143403 | 0.021204193 |
| chrX | 93250001 | 93350000 | 907  | 940  | 93300000  | -0.12393 | 0.039298591 |
| chrX | 93650001 | 93750000 | 991  | 821  | 93700000  | 0.199131 | 0.002465629 |
| chrX | 93700001 | 93800000 | 988  | 839  | 93750000  | 0.163468 | 0.010398468 |
| chrX | 93850001 | 93950000 | 1020 | 893  | 93900000  | 0.119465 | 0.045310781 |
| chrX | 93900001 | 94000000 | 954  | 828  | 93950000  | 0.131987 | 0.030832624 |
| chrX | 94150001 | 94250000 | 965  | 846  | 94200000  | 0.1175   | 0.04801728  |
| chrX | 94250001 | 94350000 | 1009 | 882  | 94300000  | 0.121704 | 0.042380192 |
| chrX | 94300001 | 94400000 | 1020 | 886  | 94350000  | 0.130819 | 0.03199609  |
| chrX | 95300001 | 95400000 | 864  | 757  | 95350000  | 0.118366 | 0.046808369 |
| chrX | 96000001 | 96100000 | 936  | 742  | 96050000  | 0.262718 | 0.000109298 |
| chrX | 96050001 | 96150000 | 924  | 751  | 96100000  | 0.226708 | 0.00069584  |
| chrX | 96100001 | 96200000 | 996  | 831  | 96150000  | 0.188925 | 0.003807479 |
| chrX | 96700001 | 96800000 | 854  | 881  | 96750000  | -0.11728 | 0.047992057 |
| chrX | 96950001 | 97050000 | 961  | 819  | 9.70E+07  | 0.158301 | 0.012576361 |
| chrX | 98050001 | 98150000 | 952  | 804  | 98100000  | 0.171394 | 0.007697997 |
| chrX | 98100001 | 98200000 | 957  | 819  | 98150000  | 0.152284 | 0.015602517 |
| chrX | 98350001 | 98450000 | 953  | 996  | 98400000  | -0.13604 | 0.026780477 |
| chrX | 99250001 | 99350000 | 987  | 854  | 99300000  | 0.136442 | 0.026712307 |
| chrX | 99300001 | 99400000 | 930  | 805  | 99350000  | 0.13587  | 0.027214055 |
| chrX | 99400001 | 99500000 | 815  | 865  | 99450000  | -0.15827 | 0.012391166 |
| chrX | 99550001 | 99650000 | 964  | 1041 | 99600000  | -0.18324 | 0.004699211 |
| chrX | 99600001 | 99700000 | 974  | 1016 | 99650000  | -0.13328 | 0.029294646 |
| chrX | 1E+08    | 1E+08    | 865  | 720  | 100300000 | 0.192331 | 0.003300171 |
| chrX | 1E+08    | 1E+08    | 853  | 733  | 100350000 | 0.146361 | 0.019173634 |
| chrX | 1E+08    | 1.01E+08 | 920  | 789  | 100450000 | 0.149237 | 0.017360803 |
| chrX | 1.01E+08 | 1.01E+08 | 780  | 811  | 101400000 | -0.1286  | 0.033999273 |
| chrX | 1.01E+08 | 1.02E+08 | 359  | 389  | 101450000 | -0.18816 | 0.003831215 |
| chrX | 1.01E+08 | 1.02E+08 | 20   | 13   | 101500000 | 0.549117 | 2.40E-14    |
| chrX | 1.02E+08 | 1.02E+08 | 51   | 74   | 101550000 | -0.6094  | 2.44E-17    |
| chrX | 1.02E+08 | 1.02E+08 | 77   | 113  | 101600000 | -0.62576 | 3.99E-18    |
| chrX | 1.02E+08 | 1.02E+08 | 39   | 51   | 101650000 | -0.45939 | 7.08E-11    |
| chrX | 1.02E+08 | 1.02E+08 | 62   | 76   | 101700000 | -0.3661  | 1.33E-07    |
| chrX | 1.02E+08 | 1.02E+08 | 878  | 768  | 102050000 | 0.120743 | 0.043618849 |
| chrX | 1.02E+08 | 1.02E+08 | 858  | 740  | 102400000 | 0.141081 | 0.0229236   |
| chrX | 1.03E+08 | 1.03E+08 | 943  | 1047 | 102950000 | -0.2233  | 0.000785908 |
| chrX | 1.03E+08 | 1.03E+08 | 681  | 706  | 103150000 | -0.12439 | 0.038754045 |
| chrX | 1.03E+08 | 1.03E+08 | 523  | 573  | 103200000 | -0.2041  | 0.001919695 |
| chrX | 1.03E+08 | 1.03E+08 | 603  | 623  | 103250000 | -0.11945 | 0.045003289 |

|      |          |          |      |      |           |          |             |
|------|----------|----------|------|------|-----------|----------|-------------|
| chrX | 1.04E+08 | 1.04E+08 | 931  | 809  | 104200000 | 0.13027  | 0.032555511 |
| chrX | 1.04E+08 | 1.04E+08 | 945  | 818  | 104350000 | 0.135842 | 0.027239209 |
| chrX | 1.04E+08 | 1.05E+08 | 925  | 956  | 104450000 | -0.11993 | 0.044358261 |
| chrX | 1.05E+08 | 1.05E+08 | 991  | 868  | 104550000 | 0.118818 | 0.046187711 |
| chrX | 1.05E+08 | 1.05E+08 | 931  | 962  | 105050000 | -0.11963 | 0.04475998  |
| chrX | 1.05E+08 | 1.05E+08 | 959  | 825  | 105250000 | 0.144765 | 0.020247502 |
| chrX | 1.06E+08 | 1.06E+08 | 1063 | 911  | 105950000 | 0.150247 | 0.016759973 |
| chrX | 1.06E+08 | 1.06E+08 | 985  | 854  | 1.06E+08  | 0.133516 | 0.029362682 |
| chrX | 1.07E+08 | 1.07E+08 | 988  | 1039 | 106700000 | -0.14498 | 0.019847263 |
| chrX | 1.07E+08 | 1.07E+08 | 884  | 934  | 106900000 | -0.15175 | 0.015676524 |
| chrX | 1.07E+08 | 1.07E+08 | 1060 | 1100 | 1.07E+08  | -0.12581 | 0.037087981 |
| chrX | 1.07E+08 | 1.07E+08 | 1015 | 1056 | 107050000 | -0.1295  | 0.033046436 |
| chrX | 1.07E+08 | 1.07E+08 | 940  | 802  | 107200000 | 0.156687 | 0.01333354  |
| chrX | 1.07E+08 | 1.07E+08 | 960  | 830  | 107250000 | 0.137551 | 0.025761676 |
| chrX | 1.07E+08 | 1.08E+08 | 1057 | 1094 | 107450000 | -0.12201 | 0.04166569  |
| chrX | 1.07E+08 | 1.08E+08 | 945  | 1024 | 107500000 | -0.1882  | 0.003824285 |
| chrX | 1.08E+08 | 1.08E+08 | 961  | 1015 | 107550000 | -0.15124 | 0.01595941  |
| chrX | 1.08E+08 | 1.08E+08 | 1013 | 867  | 107650000 | 0.152159 | 0.015671622 |
| chrX | 1.09E+08 | 1.09E+08 | 958  | 815  | 108750000 | 0.160854 | 0.011455378 |
| chrX | 1.09E+08 | 1.09E+08 | 963  | 837  | 108800000 | 0.129936 | 0.032899008 |
| chrX | 1.1E+08  | 1.1E+08  | 992  | 1049 | 109950000 | -0.15297 | 0.01500711  |
| chrX | 1.11E+08 | 1.11E+08 | 1043 | 899  | 110700000 | 0.141974 | 0.022248363 |
| chrX | 1.11E+08 | 1.11E+08 | 839  | 662  | 110850000 | 0.269468 | 7.53E-05    |
| chrX | 1.11E+08 | 1.11E+08 | 939  | 741  | 110900000 | 0.26928  | 7.61E-05    |
| chrX | 1.11E+08 | 1.11E+08 | 955  | 811  | 1.11E+08  | 0.163427 | 0.01041452  |
| chrX | 1.11E+08 | 1.11E+08 | 926  | 987  | 111100000 | -0.16441 | 0.009863633 |
| chrX | 1.11E+08 | 1.11E+08 | 925  | 983  | 111150000 | -0.16011 | 0.011581041 |
| chrX | 1.12E+08 | 1.12E+08 | 916  | 741  | 112350000 | 0.233502 | 0.000499243 |
| chrX | 1.12E+08 | 1.12E+08 | 937  | 778  | 112400000 | 0.195907 | 0.002833966 |
| chrX | 1.13E+08 | 1.13E+08 | 931  | 815  | 112650000 | 0.119609 | 0.045117415 |
| chrX | 1.13E+08 | 1.13E+08 | 907  | 778  | 112700000 | 0.148961 | 0.017528255 |
| chrX | 1.13E+08 | 1.13E+08 | 1074 | 881  | 113200000 | 0.213408 | 0.001302196 |
| chrX | 1.13E+08 | 1.13E+08 | 961  | 833  | 113250000 | 0.133848 | 0.029051115 |
| chrX | 1.13E+08 | 1.13E+08 | 922  | 784  | 113350000 | 0.161541 | 0.011168768 |
| chrX | 1.13E+08 | 1.13E+08 | 911  | 762  | 113400000 | 0.185288 | 0.004425719 |
| chrX | 1.13E+08 | 1.14E+08 | 691  | 600  | 113500000 | 0.131351 | 0.031461037 |
| chrX | 1.14E+08 | 1.14E+08 | 530  | 441  | 113550000 | 0.192842 | 0.003229632 |
| chrX | 1.14E+08 | 1.14E+08 | 962  | 799  | 113700000 | 0.19547  | 0.002887616 |
| chrX | 1.14E+08 | 1.14E+08 | 911  | 791  | 113750000 | 0.131402 | 0.031411047 |
| chrX | 1.14E+08 | 1.14E+08 | 949  | 830  | 113850000 | 0.120925 | 0.043381878 |
| chrX | 1.14E+08 | 1.14E+08 | 973  | 845  | 113900000 | 0.131117 | 0.031695915 |
| chrX | 1.14E+08 | 1.14E+08 | 901  | 768  | 1.14E+08  | 0.158049 | 0.012692116 |
| chrX | 1.14E+08 | 1.14E+08 | 917  | 799  | 114150000 | 0.126354 | 0.03678336  |
| chrX | 1.15E+08 | 1.15E+08 | 1018 | 867  | 114650000 | 0.159262 | 0.012143761 |
| chrX | 1.15E+08 | 1.15E+08 | 879  | 927  | 115050000 | -0.14908 | 0.017223108 |
| chrX | 1.15E+08 | 1.15E+08 | 833  | 712  | 115250000 | 0.154067 | 0.014646067 |
| chrX | 1.15E+08 | 1.15E+08 | 877  | 737  | 115300000 | 0.17854  | 0.005815146 |

|      |          |          |      |      |           |          |             |
|------|----------|----------|------|------|-----------|----------|-------------|
| chrX | 1.16E+08 | 1.16E+08 | 887  | 775  | 115850000 | 0.122366 | 0.041543414 |
| chrX | 1.16E+08 | 1.16E+08 | 860  | 723  | 116350000 | 0.177969 | 0.005948945 |
| chrX | 1.17E+08 | 1.17E+08 | 904  | 787  | 117200000 | 0.127587 | 0.03540592  |
| chrX | 1.17E+08 | 1.17E+08 | 982  | 857  | 117250000 | 0.124056 | 0.03946856  |
| chrX | 1.18E+08 | 1.18E+08 | 845  | 883  | 118050000 | -0.13583 | 0.026962754 |
| chrX | 1.18E+08 | 1.18E+08 | 969  | 833  | 118150000 | 0.145808 | 0.019539702 |
| chrX | 1.19E+08 | 1.19E+08 | 777  | 815  | 119100000 | -0.14126 | 0.022525202 |
| chrX | 1.19E+08 | 1.19E+08 | 514  | 404  | 119200000 | 0.275041 | 5.51E-05    |
| chrX | 1.19E+08 | 1.2E+08  | 938  | 974  | 119450000 | -0.12671 | 0.036072978 |
| chrX | 1.2E+08  | 1.2E+08  | 904  | 791  | 119650000 | 0.120273 | 0.044234652 |
| chrX | 1.2E+08  | 1.2E+08  | 966  | 814  | 119700000 | 0.174623 | 0.006789294 |
| chrX | 1.21E+08 | 1.21E+08 | 931  | 815  | 120600000 | 0.119609 | 0.045117415 |
| chrX | 1.21E+08 | 1.21E+08 | 949  | 829  | 120650000 | 0.122664 | 0.04117101  |
| chrX | 1.21E+08 | 1.21E+08 | 962  | 838  | 121100000 | 0.126715 | 0.036376212 |
| chrX | 1.21E+08 | 1.21E+08 | 949  | 832  | 121150000 | 0.117453 | 0.048083151 |
| chrX | 1.22E+08 | 1.22E+08 | 986  | 812  | 121800000 | 0.207736 | 0.00168529  |
| chrX | 1.22E+08 | 1.22E+08 | 1004 | 851  | 121850000 | 0.166156 | 0.009401817 |
| chrX | 1.22E+08 | 1.22E+08 | 1020 | 886  | 121900000 | 0.130819 | 0.03199609  |
| chrX | 1.22E+08 | 1.22E+08 | 923  | 787  | 122100000 | 0.157595 | 0.012902737 |
| chrX | 1.23E+08 | 1.23E+08 | 929  | 806  | 122800000 | 0.132527 | 0.03030645  |
| chrX | 1.23E+08 | 1.23E+08 | 946  | 814  | 123150000 | 0.14444  | 0.020472574 |
| chrX | 1.23E+08 | 1.23E+08 | 905  | 781  | 123200000 | 0.140223 | 0.023587361 |
| chrX | 1.23E+08 | 1.23E+08 | 758  | 834  | 123300000 | -0.21022 | 0.001454294 |
| chrX | 1.23E+08 | 1.23E+08 | 921  | 965  | 123350000 | -0.1397  | 0.023731629 |
| chrX | 1.24E+08 | 1.24E+08 | 977  | 851  | 124200000 | 0.126828 | 0.036249573 |
| chrX | 1.24E+08 | 1.24E+08 | 945  | 792  | 124400000 | 0.182442 | 0.004970714 |
| chrX | 1.25E+08 | 1.25E+08 | 953  | 832  | 124550000 | 0.123521 | 0.040116192 |
| chrX | 1.25E+08 | 1.25E+08 | 924  | 810  | 124600000 | 0.117599 | 0.047877006 |
| chrX | 1.25E+08 | 1.25E+08 | 898  | 785  | 125200000 | 0.121651 | 0.042447528 |
| chrX | 1.25E+08 | 1.26E+08 | 927  | 797  | 125500000 | 0.145618 | 0.019667361 |
| chrX | 1.26E+08 | 1.26E+08 | 878  | 753  | 125550000 | 0.149199 | 0.017383451 |
| chrX | 1.26E+08 | 1.26E+08 | 888  | 761  | 125600000 | 0.150291 | 0.016733869 |
| chrX | 1.26E+08 | 1.26E+08 | 1017 | 857  | 125750000 | 0.174581 | 0.006800431 |
| chrX | 1.26E+08 | 1.26E+08 | 782  | 811  | 126100000 | -0.12491 | 0.038139599 |
| chrX | 1.26E+08 | 1.27E+08 | 879  | 766  | 126500000 | 0.126147 | 0.037019405 |
| chrX | 1.27E+08 | 1.27E+08 | 962  | 841  | 126550000 | 0.121559 | 0.042564625 |
| chrX | 1.27E+08 | 1.27E+08 | 1038 | 863  | 127150000 | 0.194002 | 0.00307434  |
| chrX | 1.27E+08 | 1.27E+08 | 968  | 763  | 127350000 | 0.270952 | 6.94E-05    |
| chrX | 1.27E+08 | 1.27E+08 | 1041 | 847  | 127400000 | 0.225164 | 0.000749527 |
| chrX | 1.27E+08 | 1.28E+08 | 1041 | 899  | 127450000 | 0.139205 | 0.02439686  |
| chrX | 1.28E+08 | 1.28E+08 | 894  | 935  | 127800000 | -0.13706 | 0.025897402 |
| chrX | 1.28E+08 | 1.28E+08 | 884  | 749  | 127900000 | 0.166709 | 0.009207707 |
| chrX | 1.28E+08 | 1.28E+08 | 853  | 883  | 128350000 | -0.12224 | 0.041375875 |
| chrX | 1.28E+08 | 1.28E+08 | 789  | 887  | 128400000 | -0.24128 | 0.000320946 |
| chrX | 1.28E+08 | 1.29E+08 | 754  | 658  | 128500000 | 0.124105 | 0.039409545 |
| chrX | 1.29E+08 | 1.29E+08 | 954  | 1012 | 129200000 | -0.15752 | 0.012736529 |
| chrX | 1.29E+08 | 1.29E+08 | 905  | 943  | 129250000 | -0.13171 | 0.030805693 |

|      |          |          |      |      |           |          |             |
|------|----------|----------|------|------|-----------|----------|-------------|
| chrX | 1.3E+08  | 1.3E+08  | 878  | 924  | 129700000 | -0.14604 | 0.019137568 |
| chrX | 1.31E+08 | 1.31E+08 | 703  | 730  | 130850000 | -0.12674 | 0.036030457 |
| chrX | 1.31E+08 | 1.31E+08 | 962  | 1020 | 131200000 | -0.15683 | 0.01305969  |
| chrX | 1.32E+08 | 1.32E+08 | 1012 | 843  | 131900000 | 0.191233 | 0.003456695 |
| chrX | 1.32E+08 | 1.32E+08 | 956  | 987  | 132400000 | -0.11841 | 0.046410284 |
| chrX | 1.33E+08 | 1.33E+08 | 896  | 925  | 132550000 | -0.11833 | 0.046527194 |
| chrX | 1.33E+08 | 1.33E+08 | 1046 | 911  | 132700000 | 0.126988 | 0.036070018 |
| chrX | 1.33E+08 | 1.33E+08 | 1007 | 879  | 132750000 | 0.123757 | 0.039829608 |
| chrX | 1.33E+08 | 1.33E+08 | 1003 | 1036 | 132850000 | -0.11907 | 0.045504807 |
| chrX | 1.33E+08 | 1.33E+08 | 1010 | 1066 | 132900000 | -0.15022 | 0.016543994 |
| chrX | 1.33E+08 | 1.33E+08 | 972  | 1006 | 132950000 | -0.12197 | 0.04171022  |
| chrX | 1.33E+08 | 1.33E+08 | 994  | 819  | 133300000 | 0.207011 | 0.001741103 |
| chrX | 1.33E+08 | 1.33E+08 | 952  | 833  | 133350000 | 0.120273 | 0.044234652 |
| chrX | 1.34E+08 | 1.34E+08 | 939  | 803  | 133600000 | 0.153353 | 0.0150227   |
| chrX | 1.34E+08 | 1.34E+08 | 974  | 1045 | 133750000 | -0.17388 | 0.006846398 |
| chrX | 1.34E+08 | 1.34E+08 | 991  | 1042 | 133800000 | -0.14477 | 0.019993604 |
| chrX | 1.34E+08 | 1.34E+08 | 915  | 962  | 134150000 | -0.14464 | 0.020084961 |
| chrX | 1.34E+08 | 1.34E+08 | 886  | 917  | 134200000 | -0.12199 | 0.04169387  |
| chrX | 1.35E+08 | 1.35E+08 | 957  | 1023 | 134600000 | -0.16859 | 0.008412954 |
| chrX | 1.35E+08 | 1.35E+08 | 953  | 1088 | 134650000 | -0.2635  | 9.80E-05    |
| chrX | 1.35E+08 | 1.35E+08 | 859  | 976  | 134700000 | -0.25659 | 0.000143011 |
| chrX | 1.35E+08 | 1.35E+08 | 725  | 749  | 134750000 | -0.11936 | 0.045123533 |
| chrX | 1.35E+08 | 1.35E+08 | 921  | 973  | 135150000 | -0.15161 | 0.015753166 |
| chrX | 1.35E+08 | 1.35E+08 | 901  | 954  | 135200000 | -0.15483 | 0.014039201 |
| chrX | 1.35E+08 | 1.36E+08 | 958  | 1005 | 135450000 | -0.14147 | 0.022364724 |
| chrX | 1.36E+08 | 1.36E+08 | 806  | 682  | 135950000 | 0.168636 | 0.008557728 |
| chrX | 1.36E+08 | 1.36E+08 | 790  | 663  | 1.36E+08  | 0.180472 | 0.005382333 |
| chrX | 1.36E+08 | 1.36E+08 | 784  | 679  | 136050000 | 0.13507  | 0.027928781 |
| chrX | 1.36E+08 | 1.36E+08 | 926  | 959  | 136150000 | -0.12289 | 0.040565701 |
| chrX | 1.36E+08 | 1.37E+08 | 1037 | 900  | 136450000 | 0.132047 | 0.030773337 |
| chrX | 1.37E+08 | 1.37E+08 | 885  | 771  | 136750000 | 0.126575 | 0.036533984 |
| chrX | 1.37E+08 | 1.37E+08 | 823  | 855  | 137300000 | -0.1274  | 0.035296805 |
| chrX | 1.37E+08 | 1.37E+08 | 811  | 841  | 137350000 | -0.12478 | 0.038291799 |
| chrX | 1.37E+08 | 1.38E+08 | 988  | 864  | 137450000 | 0.121108 | 0.043144844 |
| chrX | 1.38E+08 | 1.38E+08 | 927  | 1024 | 137950000 | -0.21595 | 0.00111512  |
| chrX | 1.38E+08 | 1.38E+08 | 922  | 990  | 1.38E+08  | -0.17503 | 0.006541751 |
| chrX | 1.38E+08 | 1.39E+08 | 938  | 820  | 138450000 | 0.121592 | 0.042522557 |
| chrX | 1.39E+08 | 1.39E+08 | 660  | 708  | 139100000 | -0.17366 | 0.00690757  |
| chrX | 1.4E+08  | 1.4E+08  | 907  | 949  | 139800000 | -0.13768 | 0.025378704 |
| chrX | 1.4E+08  | 1.4E+08  | 1    | 8    | 140150000 | -3.07237 | 1.54E-145   |
| chrX | 1.4E+08  | 1.41E+08 | 918  | 772  | 140500000 | 0.177522 | 0.006055722 |
| chrX | 1.41E+08 | 1.41E+08 | 116  | 129  | 140600000 | -0.22562 | 0.00070259  |
| chrX | 1.41E+08 | 1.41E+08 | 711  | 610  | 140800000 | 0.148669 | 0.01770686  |
| chrX | 1.41E+08 | 1.41E+08 | 915  | 785  | 140850000 | 0.148707 | 0.017683061 |
| chrX | 1.41E+08 | 1.41E+08 | 886  | 776  | 141250000 | 0.118878 | 0.046105781 |
| chrX | 1.42E+08 | 1.42E+08 | 928  | 960  | 141700000 | -0.12128 | 0.04259223  |
| chrX | 1.42E+08 | 1.42E+08 | 938  | 804  | 141900000 | 0.150021 | 0.016892961 |

|      |          |          |      |      |           |          |             |
|------|----------|----------|------|------|-----------|----------|-------------|
| chrX | 1.42E+08 | 1.42E+08 | 1070 | 926  | 142200000 | 0.136155 | 0.026963322 |
| chrX | 1.42E+08 | 1.43E+08 | 849  | 908  | 142450000 | -0.1693  | 0.008185247 |
| chrX | 1.42E+08 | 1.43E+08 | 863  | 917  | 142500000 | -0.15993 | 0.011656945 |
| chrX | 1.43E+08 | 1.43E+08 | 992  | 842  | 142700000 | 0.164148 | 0.010138107 |
| chrX | 1.43E+08 | 1.43E+08 | 1041 | 867  | 142750000 | 0.191494 | 0.00341885  |
| chrX | 1.43E+08 | 1.43E+08 | 979  | 847  | 142950000 | 0.136575 | 0.026596884 |
| chrX | 1.43E+08 | 1.43E+08 | 123  | 103  | 143200000 | 0.183642 | 0.004733995 |
| chrX | 1.43E+08 | 1.43E+08 | 58   | 64   | 143250000 | -0.21439 | 0.001199247 |
| chrX | 1.44E+08 | 1.44E+08 | 1001 | 865  | 143700000 | 0.138298 | 0.02513764  |
| chrX | 1.44E+08 | 1.44E+08 | 1066 | 888  | 143900000 | 0.191204 | 0.003460901 |
| chrX | 1.44E+08 | 1.44E+08 | 982  | 838  | 143950000 | 0.156401 | 0.013471589 |
| chrX | 1.45E+08 | 1.45E+08 | 884  | 917  | 144550000 | -0.12525 | 0.037739714 |
| chrX | 1.45E+08 | 1.45E+08 | 900  | 955  | 145150000 | -0.15795 | 0.012539122 |
| chrX | 1.45E+08 | 1.46E+08 | 1009 | 876  | 145450000 | 0.131552 | 0.031261877 |
| chrX | 1.46E+08 | 1.46E+08 | 981  | 844  | 145750000 | 0.144638 | 0.020334813 |
| chrX | 1.46E+08 | 1.46E+08 | 951  | 799  | 145800000 | 0.178878 | 0.00573733  |
| chrX | 1.46E+08 | 1.46E+08 | 818  | 648  | 145850000 | 0.263735 | 0.00010339  |
| chrX | 1.46E+08 | 1.46E+08 | 795  | 648  | 145900000 | 0.222589 | 0.000847675 |
| chrX | 1.46E+08 | 1.46E+08 | 823  | 710  | 146250000 | 0.140702 | 0.0232151   |
| chrX | 1.46E+08 | 1.47E+08 | 990  | 868  | 146450000 | 0.117362 | 0.048211768 |
| chrX | 1.47E+08 | 1.47E+08 | 976  | 1019 | 146650000 | -0.13457 | 0.028093392 |
| chrX | 1.47E+08 | 1.47E+08 | 1096 | 959  | 146850000 | 0.120273 | 0.044234652 |
| chrX | 1.47E+08 | 1.47E+08 | 930  | 996  | 147150000 | -0.17129 | 0.007578513 |
| chrX | 1.48E+08 | 1.48E+08 | 1116 | 951  | 147700000 | 0.158448 | 0.012509401 |
| chrX | 1.48E+08 | 1.48E+08 | 1005 | 1041 | 147950000 | -0.12315 | 0.040250695 |
| chrX | 1.48E+08 | 1.48E+08 | 1042 | 1086 | 1.48E+08  | -0.13204 | 0.030483284 |
| chrX | 1.48E+08 | 1.48E+08 | 784  | 817  | 148300000 | -0.13185 | 0.030665691 |
| chrX | 1.49E+08 | 1.49E+08 | 410  | 434  | 148850000 | -0.15444 | 0.014238136 |
| chrX | 1.49E+08 | 1.49E+08 | 250  | 272  | 148900000 | -0.19405 | 0.002983201 |
| chrX | 1.49E+08 | 1.49E+08 | 317  | 335  | 149050000 | -0.15205 | 0.01550931  |
| chrX | 1.49E+08 | 1.49E+08 | 414  | 432  | 149100000 | -0.13377 | 0.028831366 |
| chrX | 1.49E+08 | 1.49E+08 | 1025 | 1101 | 149400000 | -0.17556 | 0.006406043 |
| chrX | 1.49E+08 | 1.5E+08  | 1026 | 1096 | 149450000 | -0.16759 | 0.008741385 |
| chrX | 1.49E+08 | 1.5E+08  | 1043 | 1100 | 149500000 | -0.14914 | 0.017188056 |
| chrX | 1.5E+08  | 1.5E+08  | 1003 | 1085 | 149700000 | -0.18575 | 0.004236957 |
| chrX | 1.5E+08  | 1.5E+08  | 977  | 1045 | 149750000 | -0.16944 | 0.008139657 |
| chrX | 1.5E+08  | 1.5E+08  | 928  | 978  | 150100000 | -0.14808 | 0.017832924 |
| chrX | 1.5E+08  | 1.5E+08  | 896  | 996  | 150150000 | -0.22502 | 0.000723341 |
| chrX | 1.5E+08  | 1.5E+08  | 891  | 932  | 150200000 | -0.13728 | 0.025716474 |
| chrX | 1.51E+08 | 1.51E+08 | 1058 | 1101 | 150850000 | -0.12985 | 0.032688272 |
| chrX | 1.51E+08 | 1.51E+08 | 1083 | 1134 | 150900000 | -0.13876 | 0.024485996 |
| chrX | 1.51E+08 | 1.51E+08 | 1105 | 952  | 151350000 | 0.142641 | 0.021755666 |
| chrX | 1.51E+08 | 1.51E+08 | 959  | 835  | 151400000 | 0.127383 | 0.035631433 |
| chrX | 1.52E+08 | 1.52E+08 | 953  | 835  | 151650000 | 0.118328 | 0.046860846 |
| chrX | 1.52E+08 | 1.52E+08 | 845  | 899  | 151800000 | -0.16174 | 0.010900861 |
| chrX | 1.52E+08 | 1.52E+08 | 482  | 511  | 151850000 | -0.15666 | 0.013140755 |
| chrX | 1.52E+08 | 1.52E+08 | 108  | 133  | 151900000 | -0.37277 | 8.14E-08    |

|      |          |          |      |      |           |          |             |
|------|----------|----------|------|------|-----------|----------|-------------|
| chrX | 1.52E+08 | 1.52E+08 | 503  | 582  | 151950000 | -0.28283 | 3.25E-05    |
| chrX | 1.52E+08 | 1.52E+08 | 929  | 998  | 1.52E+08  | -0.17573 | 0.006362781 |
| chrX | 1.52E+08 | 1.52E+08 | 1040 | 1140 | 152050000 | -0.20482 | 0.001858192 |
| chrX | 1.52E+08 | 1.52E+08 | 1044 | 1157 | 152100000 | -0.22064 | 0.000893078 |
| chrX | 1.52E+08 | 1.52E+08 | 2    | 3    | 152300000 | -0.65733 | 1.11E-19    |
| chrX | 1.52E+08 | 1.52E+08 | 217  | 233  | 152350000 | -0.17501 | 0.006548713 |
| chrX | 1.52E+08 | 1.53E+08 | 513  | 555  | 152500000 | -0.1859  | 0.00420969  |
| chrX | 1.53E+08 | 1.53E+08 | 516  | 536  | 152550000 | -0.12723 | 0.035484591 |
| chrX | 1.53E+08 | 1.53E+08 | 876  | 953  | 152600000 | -0.19392 | 0.003000328 |
| chrX | 1.53E+08 | 1.53E+08 | 1030 | 1168 | 152650000 | -0.25377 | 0.000166548 |
| chrX | 1.53E+08 | 1.53E+08 | 1085 | 1168 | 152700000 | -0.17872 | 0.005647114 |
| chrX | 1.53E+08 | 1.53E+08 | 1125 | 1303 | 152750000 | -0.28428 | 2.98E-05    |
| chrX | 1.53E+08 | 1.53E+08 | 1107 | 1367 | 152800000 | -0.37673 | 6.06E-08    |
| chrX | 1.53E+08 | 1.53E+08 | 1108 | 1244 | 152850000 | -0.2394  | 0.000353413 |
| chrX | 1.53E+08 | 1.53E+08 | 997  | 1121 | 152900000 | -0.24149 | 0.000317464 |
| chrX | 1.53E+08 | 1.53E+08 | 789  | 933  | 152950000 | -0.31422 | 4.71E-06    |
| chrX | 1.53E+08 | 1.53E+08 | 781  | 905  | 1.53E+08  | -0.28497 | 2.87E-05    |
| chrX | 1.53E+08 | 1.53E+08 | 963  | 1060 | 153050000 | -0.21083 | 0.001414308 |
| chrX | 1.53E+08 | 1.53E+08 | 1039 | 1084 | 153100000 | -0.13354 | 0.02904773  |
| chrX | 1.53E+08 | 1.53E+08 | 1018 | 1051 | 153150000 | -0.1184  | 0.046430055 |
| chrX | 1.53E+08 | 1.53E+08 | 997  | 1046 | 153200000 | -0.14159 | 0.022274894 |
| chrX | 1.53E+08 | 1.53E+08 | 931  | 985  | 153250000 | -0.15371 | 0.014615296 |
| chrX | 1.53E+08 | 1.54E+08 | 101  | 126  | 153450000 | -0.39144 | 1.98E-08    |
| chrX | 1.53E+08 | 1.54E+08 | 230  | 289  | 153500000 | -0.40181 | 8.78E-09    |
| chrX | 1.54E+08 | 1.54E+08 | 680  | 765  | 153550000 | -0.2423  | 0.000304577 |
| chrX | 1.54E+08 | 1.54E+08 | 814  | 954  | 153600000 | -0.30133 | 1.06E-05    |
| chrX | 1.54E+08 | 1.54E+08 | 862  | 1031 | 153650000 | -0.33066 | 1.60E-06    |
| chrX | 1.54E+08 | 1.54E+08 | 981  | 1030 | 153700000 | -0.14269 | 0.021460912 |
| chrX | 1.54E+08 | 1.54E+08 | 764  | 824  | 153750000 | -0.18144 | 0.005056814 |
| chrX | 1.54E+08 | 1.54E+08 | 457  | 549  | 153800000 | -0.33698 | 1.04E-06    |
| chrX | 1.54E+08 | 1.54E+08 | 327  | 355  | 153850000 | -0.1909  | 0.003412769 |
| chrX | 1.54E+08 | 1.54E+08 | 909  | 942  | 154200000 | -0.12382 | 0.039432858 |
| chrX | 1.55E+08 | 1.55E+08 | 412  | 354  | 154600000 | 0.146523 | 0.019067106 |
| chrX | 1.55E+08 | 1.55E+08 | 279  | 237  | 154950000 | 0.163006 | 0.010578838 |
| chr4 | 1        | 100000   | 1726 | 1497 | 50000     | 0.132986 | 0.029864841 |
| chr4 | 100001   | 200000   | 819  | 847  | 150000    | -0.12087 | 0.043122931 |
| chr4 | 450001   | 550000   | 837  | 884  | 5.00E+05  | -0.15119 | 0.015989163 |
| chr4 | 500001   | 600000   | 923  | 1014 | 550000    | -0.20803 | 0.001607627 |
| chr4 | 550001   | 650000   | 967  | 1020 | 6.00E+05  | -0.14935 | 0.01705789  |
| chr4 | 600001   | 700000   | 1013 | 1115 | 650000    | -0.21078 | 0.00141737  |
| chr4 | 650001   | 750000   | 923  | 1060 | 7.00E+05  | -0.27203 | 6.07E-05    |
| chr4 | 700001   | 800000   | 929  | 1038 | 750000    | -0.23243 | 0.000502455 |
| chr4 | 750001   | 850000   | 1016 | 1110 | 8.00E+05  | -0.20003 | 0.002299559 |
| chr4 | 800001   | 900000   | 1063 | 1143 | 850000    | -0.17706 | 0.006036202 |
| chr4 | 850001   | 950000   | 1005 | 1101 | 9.00E+05  | -0.20399 | 0.00192876  |
| chr4 | 900001   | 1000000  | 925  | 1148 | 950000    | -0.38397 | 3.51E-08    |
| chr4 | 950001   | 1050000  | 982  | 1336 | 1.00E+06  | -0.5165  | 3.58E-13    |

|      |         |         |      |      |          |          |             |
|------|---------|---------|------|------|----------|----------|-------------|
| chr4 | 1000001 | 1100000 | 987  | 1215 | 1050000  | -0.37221 | 8.49E-08    |
| chr4 | 1050001 | 1150000 | 934  | 1009 | 1100000  | -0.1838  | 0.004591004 |
| chr4 | 1100001 | 1200000 | 946  | 1040 | 1150000  | -0.20904 | 0.001534863 |
| chr4 | 1150001 | 1250000 | 1032 | 1174 | 1200000  | -0.25836 | 0.00012993  |
| chr4 | 1200001 | 1300000 | 999  | 1109 | 1250000  | -0.22307 | 0.000794629 |
| chr4 | 1250001 | 1350000 | 983  | 1079 | 1300000  | -0.2068  | 0.001699401 |
| chr4 | 1300001 | 1400000 | 1065 | 1223 | 1350000  | -0.27194 | 6.10E-05    |
| chr4 | 1350001 | 1450000 | 729  | 878  | 1400000  | -0.34067 | 8.09E-07    |
| chr4 | 1400001 | 1500000 | 431  | 502  | 1450000  | -0.29237 | 1.84E-05    |
| chr4 | 1450001 | 1550000 | 731  | 897  | 1500000  | -0.36761 | 1.19E-07    |
| chr4 | 1500001 | 1600000 | 1001 | 1305 | 1550000  | -0.45498 | 1.04E-10    |
| chr4 | 1550001 | 1650000 | 1003 | 1305 | 1600000  | -0.4521  | 1.34E-10    |
| chr4 | 1600001 | 1700000 | 962  | 1167 | 1650000  | -0.35107 | 3.92E-07    |
| chr4 | 1650001 | 1750000 | 951  | 1110 | 1700000  | -0.29541 | 1.53E-05    |
| chr4 | 1700001 | 1800000 | 1062 | 1283 | 1750000  | -0.34511 | 5.96E-07    |
| chr4 | 1750001 | 1850000 | 1049 | 1244 | 1800000  | -0.31834 | 3.61E-06    |
| chr4 | 1800001 | 1900000 | 921  | 1040 | 1850000  | -0.24768 | 0.000230083 |
| chr4 | 1900001 | 2000000 | 1005 | 1039 | 1950000  | -0.12037 | 0.043773477 |
| chr4 | 1950001 | 2050000 | 880  | 1024 | 2.00E+06 | -0.29101 | 2.00E-05    |
| chr4 | 2000001 | 2100000 | 912  | 1018 | 2050000  | -0.231   | 0.000539318 |
| chr4 | 2200001 | 2300000 | 1044 | 1112 | 2250000  | -0.16341 | 0.010242879 |
| chr4 | 2250001 | 2350000 | 1106 | 1228 | 2300000  | -0.22333 | 0.00078487  |
| chr4 | 2350001 | 2450000 | 1005 | 1106 | 2400000  | -0.21053 | 0.001433987 |
| chr4 | 2400001 | 2500000 | 964  | 1058 | 2450000  | -0.20661 | 0.001714614 |
| chr4 | 2600001 | 2700000 | 999  | 867  | 2650000  | 0.132081 | 0.030740351 |
| chr4 | 2700001 | 2800000 | 836  | 946  | 2750000  | -0.25071 | 0.000196082 |
| chr4 | 2750001 | 2850000 | 1011 | 1181 | 2800000  | -0.2966  | 1.42E-05    |
| chr4 | 2800001 | 2900000 | 1006 | 1109 | 2850000  | -0.213   | 0.00127931  |
| chr4 | 2900001 | 3000000 | 927  | 965  | 2950000  | -0.13033 | 0.032190058 |
| chr4 | 3150001 | 3250000 | 1002 | 1046 | 3200000  | -0.13437 | 0.028276889 |
| chr4 | 3200001 | 3300000 | 1093 | 1213 | 3250000  | -0.22266 | 0.000810725 |
| chr4 | 3250001 | 3350000 | 1081 | 1205 | 3300000  | -0.22904 | 0.000594316 |
| chr4 | 3300001 | 3400000 | 1094 | 1182 | 3350000  | -0.18399 | 0.004556057 |
| chr4 | 3350001 | 3450000 | 1127 | 1263 | 3400000  | -0.23674 | 0.000404629 |
| chr4 | 3400001 | 3500000 | 1093 | 1300 | 3450000  | -0.32259 | 2.73E-06    |
| chr4 | 3450001 | 3550000 | 939  | 1132 | 3500000  | -0.34205 | 7.36E-07    |
| chr4 | 3500001 | 3600000 | 1042 | 1128 | 3550000  | -0.18678 | 0.00405785  |
| chr4 | 3550001 | 3650000 | 1409 | 1594 | 3600000  | -0.25035 | 0.000199835 |
| chr4 | 3600001 | 3700000 | 1360 | 1654 | 3650000  | -0.35472 | 3.03E-07    |
| chr4 | 3650001 | 3750000 | 1139 | 1377 | 3700000  | -0.34613 | 5.55E-07    |
| chr4 | 3700001 | 3800000 | 1131 | 1366 | 3750000  | -0.34473 | 6.11E-07    |
| chr4 | 3750001 | 3850000 | 1149 | 1374 | 3800000  | -0.33037 | 1.63E-06    |
| chr4 | 3800001 | 3900000 | 986  | 1131 | 3850000  | -0.27031 | 6.69E-05    |
| chr4 | 3850001 | 3950000 | 496  | 558  | 3900000  | -0.2423  | 0.000304577 |
| chr4 | 3900001 | 4000000 | 160  | 166  | 3950000  | -0.12548 | 0.037465853 |
| chr4 | 4050001 | 4150000 | 92   | 97   | 4100000  | -0.14872 | 0.017438446 |
| chr4 | 4100001 | 4200000 | 207  | 243  | 4150000  | -0.3037  | 9.17E-06    |



|      |         |         |      |      |          |          |             |
|------|---------|---------|------|------|----------|----------|-------------|
| chr4 | 4150001 | 4250000 | 506  | 541  | 4200000  | -0.16886 | 0.008324119 |
| chr4 | 4250001 | 4350000 | 948  | 998  | 4300000  | -0.14652 | 0.018822596 |
| chr4 | 4300001 | 4400000 | 954  | 1075 | 4350000  | -0.24465 | 0.000269655 |
| chr4 | 4350001 | 4450000 | 1010 | 1137 | 4400000  | -0.24325 | 0.000289954 |
| chr4 | 4800001 | 4900000 | 1107 | 1146 | 4850000  | -0.12232 | 0.041270434 |
| chr4 | 4850001 | 4950000 | 1013 | 1065 | 4900000  | -0.14459 | 0.020116529 |
| chr4 | 4950001 | 5050000 | 939  | 982  | 5.00E+06 | -0.13697 | 0.025977306 |
| chr4 | 5050001 | 5150000 | 1098 | 942  | 5100000  | 0.148707 | 0.017683061 |
| chr4 | 5350001 | 5450000 | 987  | 1059 | 5400000  | -0.17395 | 0.006827183 |
| chr4 | 5400001 | 5500000 | 883  | 995  | 5450000  | -0.24465 | 0.000269548 |
| chr4 | 5550001 | 5650000 | 1000 | 1034 | 5600000  | -0.12061 | 0.043464387 |
| chr4 | 5600001 | 5700000 | 1058 | 1099 | 5650000  | -0.12722 | 0.035495854 |
| chr4 | 5650001 | 5750000 | 1049 | 1090 | 5700000  | -0.12769 | 0.034987785 |
| chr4 | 5700001 | 5800000 | 963  | 1002 | 5750000  | -0.12965 | 0.032895708 |
| chr4 | 5750001 | 5850000 | 960  | 1042 | 5800000  | -0.19062 | 0.00345344  |
| chr4 | 5800001 | 5900000 | 1047 | 1182 | 5850000  | -0.24734 | 0.000234252 |
| chr4 | 5850001 | 5950000 | 1071 | 1190 | 5900000  | -0.22437 | 0.000746269 |
| chr4 | 5900001 | 6000000 | 1053 | 1087 | 5950000  | -0.11822 | 0.046676552 |
| chr4 | 6100001 | 6200000 | 1044 | 1099 | 6150000  | -0.14644 | 0.0188767   |
| chr4 | 6150001 | 6250000 | 1064 | 1140 | 6200000  | -0.17191 | 0.007397339 |
| chr4 | 6200001 | 6300000 | 1044 | 1181 | 6250000  | -0.25026 | 0.00020082  |
| chr4 | 6250001 | 6350000 | 1051 | 1159 | 6300000  | -0.21349 | 0.00125061  |
| chr4 | 6300001 | 6400000 | 1066 | 1106 | 6350000  | -0.12552 | 0.037428134 |
| chr4 | 6350001 | 6450000 | 1044 | 1115 | 6400000  | -0.16729 | 0.008840599 |
| chr4 | 6400001 | 6500000 | 1083 | 1136 | 6450000  | -0.1413  | 0.022491791 |
| chr4 | 6450001 | 6550000 | 1103 | 1140 | 6500000  | -0.11997 | 0.044300175 |
| chr4 | 6700001 | 6800000 | 986  | 1058 | 6750000  | -0.17405 | 0.006800468 |
| chr4 | 6900001 | 7000000 | 955  | 994  | 6950000  | -0.13012 | 0.032409714 |
| chr4 | 6950001 | 7050000 | 956  | 1082 | 7.00E+06 | -0.25099 | 0.000193179 |
| chr4 | 7000001 | 7100000 | 940  | 1072 | 7050000  | -0.26194 | 0.000106776 |
| chr4 | 7050001 | 7150000 | 980  | 1089 | 7100000  | -0.22452 | 0.000740969 |
| chr4 | 7100001 | 7200000 | 1067 | 1157 | 7150000  | -0.1892  | 0.003666999 |
| chr4 | 7150001 | 7250000 | 1025 | 1092 | 7200000  | -0.16372 | 0.010122831 |
| chr4 | 7200001 | 7300000 | 1015 | 1129 | 7250000  | -0.22594 | 0.000691753 |
| chr4 | 7250001 | 7350000 | 1088 | 1184 | 7300000  | -0.19436 | 0.002943437 |
| chr4 | 7400001 | 7500000 | 1105 | 1152 | 7450000  | -0.13247 | 0.030070257 |
| chr4 | 7450001 | 7550000 | 1142 | 1202 | 7500000  | -0.14625 | 0.019004488 |
| chr4 | 7500001 | 7600000 | 1146 | 1327 | 7550000  | -0.28393 | 3.05E-05    |
| chr4 | 7550001 | 7650000 | 1054 | 1319 | 7600000  | -0.39594 | 1.39E-08    |
| chr4 | 7600001 | 7700000 | 1033 | 1286 | 7650000  | -0.38842 | 2.49E-08    |
| chr4 | 7650001 | 7750000 | 1065 | 1243 | 7700000  | -0.29534 | 1.54E-05    |
| chr4 | 7700001 | 7800000 | 1104 | 1168 | 7750000  | -0.15367 | 0.014637537 |
| chr4 | 7900001 | 8000000 | 961  | 1030 | 7950000  | -0.17241 | 0.007254084 |
| chr4 | 7950001 | 8050000 | 1000 | 1140 | 8.00E+06 | -0.26141 | 0.000109988 |
| chr4 | 8000001 | 8100000 | 1020 | 1181 | 8050000  | -0.28381 | 3.07E-05    |
| chr4 | 8050001 | 8150000 | 1040 | 1259 | 8100000  | -0.34807 | 4.84E-07    |
| chr4 | 8100001 | 8200000 | 1053 | 1266 | 8150000  | -0.33814 | 9.63E-07    |

|      |          |          |      |      |          |          |             |
|------|----------|----------|------|------|----------|----------|-------------|
| chr4 | 8150001  | 8250000  | 1081 | 1247 | 8200000  | -0.27847 | 4.19E-05    |
| chr4 | 8200001  | 8300000  | 1120 | 1303 | 8250000  | -0.29071 | 2.03E-05    |
| chr4 | 8250001  | 8350000  | 1069 | 1228 | 8300000  | -0.27242 | 5.94E-05    |
| chr4 | 8300001  | 8400000  | 1033 | 1131 | 8350000  | -0.20313 | 0.002004348 |
| chr4 | 8350001  | 8450000  | 909  | 1001 | 8400000  | -0.21146 | 0.001373672 |
| chr4 | 8400001  | 8500000  | 834  | 879  | 8450000  | -0.14819 | 0.017767117 |
| chr4 | 8450001  | 8550000  | 904  | 968  | 8500000  | -0.17106 | 0.007646864 |
| chr4 | 8500001  | 8600000  | 973  | 1095 | 8550000  | -0.24279 | 0.000296903 |
| chr4 | 8550001  | 8650000  | 877  | 973  | 8600000  | -0.22223 | 0.000827383 |
| chr4 | 8600001  | 8700000  | 944  | 1013 | 8650000  | -0.17415 | 0.006774953 |
| chr4 | 8700001  | 8800000  | 1122 | 1202 | 8750000  | -0.17174 | 0.007447002 |
| chr4 | 8750001  | 8850000  | 881  | 980  | 8800000  | -0.22601 | 0.000689266 |
| chr4 | 8800001  | 8900000  | 962  | 1059 | 8850000  | -0.21097 | 0.00140541  |
| chr4 | 8850001  | 8950000  | 1042 | 1156 | 8900000  | -0.22216 | 0.000830441 |
| chr4 | 8900001  | 9000000  | 507  | 524  | 8950000  | -0.11995 | 0.044326661 |
| chr4 | 8950001  | 9050000  | 118  | 127  | 9.00E+06 | -0.17841 | 0.0057165   |
| chr4 | 9050001  | 9150000  | 107  | 112  | 9100000  | -0.13826 | 0.024894794 |
| chr4 | 9200001  | 9300000  | 3    | 15   | 9250000  | -2.3943  | 1.39E-120   |
| chr4 | 9250001  | 9350000  | 0    | 2    | 9300000  | #NAME?   | 1.59E-189   |
| chr4 | 9300001  | 9400000  | 57   | 46   | 9350000  | 0.236956 | 0.000420405 |
| chr4 | 9450001  | 9550000  | 112  | 137  | 9500000  | -0.36305 | 1.66E-07    |
| chr4 | 9500001  | 9600000  | 169  | 201  | 9550000  | -0.32254 | 2.74E-06    |
| chr4 | 9650001  | 9750000  | 189  | 196  | 9700000  | -0.12484 | 0.038217021 |
| chr4 | 9700001  | 9800000  | 334  | 364  | 9750000  | -0.19646 | 0.00268802  |
| chr4 | 9750001  | 9850000  | 710  | 765  | 9800000  | -0.18001 | 0.005359383 |
| chr4 | 9900001  | 10000000 | 1013 | 1045 | 9950000  | -0.11724 | 0.048044665 |
| chr4 | 10000001 | 10100000 | 1038 | 1108 | 10050000 | -0.16652 | 0.009104371 |
| chr4 | 10050001 | 10150000 | 1064 | 1156 | 10100000 | -0.19202 | 0.003254754 |
| chr4 | 10100001 | 10200000 | 1102 | 1229 | 10150000 | -0.22973 | 0.000574324 |
| chr4 | 10150001 | 10250000 | 970  | 1079 | 10200000 | -0.22601 | 0.000689317 |
| chr4 | 10200001 | 10300000 | 997  | 1050 | 10250000 | -0.1471  | 0.018454218 |
| chr4 | 10900001 | 11000000 | 1016 | 1048 | 10950000 | -0.11711 | 0.048229612 |
| chr4 | 10950001 | 11050000 | 961  | 1038 | 1.10E+07 | -0.18357 | 0.004635337 |
| chr4 | 11200001 | 11300000 | 935  | 964  | 11250000 | -0.11644 | 0.049190711 |
| chr4 | 12000001 | 12100000 | 968  | 814  | 12050000 | 0.177606 | 0.006035332 |
| chr4 | 12050001 | 12150000 | 1009 | 864  | 12100000 | 0.151451 | 0.016067012 |
| chr4 | 12100001 | 12200000 | 1055 | 903  | 12150000 | 0.152073 | 0.015718783 |
| chr4 | 12500001 | 12600000 | 1050 | 902  | 12550000 | 0.146818 | 0.018874921 |
| chr4 | 12550001 | 12650000 | 1038 | 908  | 12600000 | 0.12067  | 0.043713328 |
| chr4 | 12900001 | 13000000 | 998  | 863  | 12950000 | 0.137307 | 0.025968188 |
| chr4 | 13500001 | 13600000 | 961  | 1024 | 13550000 | -0.16398 | 0.010024913 |
| chr4 | 13550001 | 13650000 | 924  | 993  | 13600000 | -0.17627 | 0.006227682 |
| chr4 | 14200001 | 14300000 | 966  | 826  | 14250000 | 0.15351  | 0.014939588 |
| chr4 | 14350001 | 14450000 | 961  | 1009 | 14400000 | -0.14269 | 0.021461972 |
| chr4 | 14450001 | 14550000 | 969  | 834  | 14500000 | 0.144078 | 0.020725606 |
| chr4 | 14500001 | 14600000 | 1067 | 889  | 14550000 | 0.190933 | 0.003500576 |
| chr4 | 15000001 | 15100000 | 1114 | 949  | 15050000 | 0.158897 | 0.012306314 |

|      |          |          |      |      |          |          |             |
|------|----------|----------|------|------|----------|----------|-------------|
| chr4 | 15050001 | 15150000 | 1073 | 902  | 15100000 | 0.178079 | 0.005923032 |
| chr4 | 15600001 | 15700000 | 988  | 810  | 15650000 | 0.214217 | 0.001254592 |
| chr4 | 15650001 | 15750000 | 1065 | 914  | 15700000 | 0.148216 | 0.017986923 |
| chr4 | 16300001 | 16400000 | 913  | 975  | 16350000 | -0.16716 | 0.008886198 |
| chr4 | 16350001 | 16450000 | 889  | 943  | 16400000 | -0.15745 | 0.012770855 |
| chr4 | 16850001 | 16950000 | 979  | 811  | 16900000 | 0.199235 | 0.002454494 |
| chr4 | 16900001 | 17000000 | 961  | 840  | 16950000 | 0.121775 | 0.042289199 |
| chr4 | 17150001 | 17250000 | 1014 | 886  | 17200000 | 0.122307 | 0.041617102 |
| chr4 | 17200001 | 17300000 | 1097 | 941  | 17250000 | 0.148925 | 0.017549879 |
| chr4 | 17450001 | 17550000 | 979  | 1017 | 17500000 | -0.12731 | 0.035399483 |
| chr4 | 17800001 | 17900000 | 1004 | 859  | 17850000 | 0.152657 | 0.015397771 |
| chr4 | 18400001 | 18500000 | 916  | 969  | 18450000 | -0.15352 | 0.014716896 |
| chr4 | 18450001 | 18550000 | 917  | 975  | 18500000 | -0.16085 | 0.011267108 |
| chr4 | 18500001 | 18600000 | 908  | 953  | 18550000 | -0.14216 | 0.021853214 |
| chr4 | 18550001 | 18650000 | 829  | 890  | 18600000 | -0.17481 | 0.006601189 |
| chr4 | 19300001 | 19400000 | 1014 | 856  | 19350000 | 0.172003 | 0.007518809 |
| chr4 | 19350001 | 19450000 | 1045 | 828  | 19400000 | 0.263428 | 0.000105138 |
| chr4 | 19400001 | 19500000 | 1021 | 850  | 19450000 | 0.192076 | 0.00333594  |
| chr4 | 19450001 | 19550000 | 1042 | 868  | 19500000 | 0.191217 | 0.003459085 |
| chr4 | 19500001 | 19600000 | 1009 | 847  | 19550000 | 0.180121 | 0.005458884 |
| chr4 | 19650001 | 19750000 | 980  | 848  | 19700000 | 0.136346 | 0.026796422 |
| chr4 | 19800001 | 19900000 | 999  | 861  | 19850000 | 0.1421   | 0.022155055 |
| chr4 | 19950001 | 20050000 | 1032 | 896  | 2.00E+07 | 0.131501 | 0.031312581 |
| chr4 | 20000001 | 20100000 | 1035 | 893  | 20050000 | 0.140527 | 0.023350543 |
| chr4 | 20050001 | 20150000 | 1009 | 843  | 20100000 | 0.18695  | 0.004132912 |
| chr4 | 22800001 | 22900000 | 939  | 992  | 22850000 | -0.15159 | 0.015766398 |
| chr4 | 22850001 | 22950000 | 990  | 1039 | 22900000 | -0.14207 | 0.021918787 |
| chr4 | 22950001 | 23050000 | 1091 | 924  | 2.30E+07 | 0.167315 | 0.00899893  |
| chr4 | 24500001 | 24600000 | 977  | 857  | 24550000 | 0.116692 | 0.049166628 |
| chr4 | 24800001 | 24900000 | 1028 | 1065 | 24850000 | -0.12338 | 0.039958835 |
| chr4 | 24850001 | 24950000 | 988  | 1019 | 24900000 | -0.11694 | 0.048467504 |
| chr4 | 25600001 | 25700000 | 864  | 903  | 25650000 | -0.13607 | 0.02675845  |
| chr4 | 25850001 | 25950000 | 1014 | 1071 | 25900000 | -0.15127 | 0.015942794 |
| chr4 | 26200001 | 26300000 | 994  | 862  | 26250000 | 0.133186 | 0.02967455  |
| chr4 | 26250001 | 26350000 | 929  | 807  | 26300000 | 0.130738 | 0.032077731 |
| chr4 | 26350001 | 26450000 | 1026 | 896  | 26400000 | 0.123088 | 0.040646037 |
| chr4 | 26650001 | 26750000 | 901  | 770  | 26700000 | 0.154297 | 0.014526813 |
| chr4 | 26700001 | 26800000 | 1055 | 882  | 26750000 | 0.186021 | 0.004294439 |
| chr4 | 26750001 | 26850000 | 1080 | 947  | 26800000 | 0.117223 | 0.048407888 |
| chr4 | 26900001 | 27000000 | 1050 | 895  | 26950000 | 0.158058 | 0.012687994 |
| chr4 | 27350001 | 27450000 | 983  | 827  | 27400000 | 0.176932 | 0.006198845 |
| chr4 | 27650001 | 27750000 | 1077 | 926  | 27700000 | 0.145562 | 0.019704651 |
| chr4 | 27700001 | 27800000 | 1049 | 917  | 27750000 | 0.121649 | 0.042449763 |
| chr4 | 27800001 | 27900000 | 1042 | 895  | 27850000 | 0.147024 | 0.018741898 |
| chr4 | 27850001 | 27950000 | 1129 | 913  | 27900000 | 0.233987 | 0.000487408 |
| chr4 | 27900001 | 28000000 | 1043 | 869  | 27950000 | 0.190939 | 0.00349966  |
| chr4 | 28050001 | 28150000 | 957  | 838  | 28100000 | 0.119197 | 0.045672875 |

|      |          |          |      |     |          |          |             |
|------|----------|----------|------|-----|----------|----------|-------------|
| chr4 | 28200001 | 28300000 | 987  | 862 | 28250000 | 0.12299  | 0.040766707 |
| chr4 | 28400001 | 28500000 | 1006 | 811 | 28450000 | 0.238485 | 0.000389359 |
| chr4 | 28450001 | 28550000 | 1028 | 830 | 28500000 | 0.236285 | 0.000434751 |
| chr4 | 28500001 | 28600000 | 1003 | 845 | 28550000 | 0.174927 | 0.006708841 |
| chr4 | 29000001 | 29100000 | 1084 | 945 | 29050000 | 0.125607 | 0.03763994  |
| chr4 | 29050001 | 29150000 | 1088 | 930 | 29100000 | 0.154004 | 0.014679131 |
| chr4 | 29100001 | 29200000 | 1034 | 896 | 29150000 | 0.134294 | 0.028637613 |
| chr4 | 29150001 | 29250000 | 989  | 851 | 29200000 | 0.14444  | 0.020472574 |
| chr4 | 29200001 | 29300000 | 1025 | 864 | 29250000 | 0.174149 | 0.006916378 |
| chr4 | 29250001 | 29350000 | 1041 | 889 | 29300000 | 0.155343 | 0.013993594 |
| chr4 | 29300001 | 29400000 | 1030 | 861 | 29350000 | 0.186187 | 0.00426504  |
| chr4 | 29350001 | 29450000 | 1030 | 843 | 29400000 | 0.216668 | 0.001119976 |
| chr4 | 29400001 | 29500000 | 1022 | 871 | 29450000 | 0.158279 | 0.012586609 |
| chr4 | 29700001 | 29800000 | 986  | 844 | 29750000 | 0.151973 | 0.015774568 |
| chr4 | 29750001 | 29850000 | 1029 | 811 | 29800000 | 0.271097 | 6.88E-05    |
| chr4 | 29800001 | 29900000 | 985  | 816 | 29850000 | 0.199183 | 0.002460089 |
| chr4 | 29850001 | 29950000 | 969  | 841 | 29900000 | 0.132019 | 0.030800889 |
| chr4 | 30000001 | 30100000 | 986  | 821 | 30050000 | 0.191834 | 0.003370294 |
| chr4 | 30050001 | 30150000 | 1003 | 849 | 30100000 | 0.168113 | 0.00872996  |
| chr4 | 30100001 | 30200000 | 1059 | 857 | 30150000 | 0.232964 | 0.000512708 |
| chr4 | 30150001 | 30250000 | 1010 | 852 | 30200000 | 0.173058 | 0.007217044 |
| chr4 | 30400001 | 30500000 | 1040 | 901 | 30450000 | 0.134613 | 0.028344656 |
| chr4 | 30550001 | 30650000 | 1022 | 884 | 30600000 | 0.136905 | 0.026312008 |
| chr4 | 30750001 | 30850000 | 1049 | 917 | 30800000 | 0.121649 | 0.042449763 |
| chr4 | 31150001 | 31250000 | 997  | 853 | 31200000 | 0.152676 | 0.01538768  |
| chr4 | 31350001 | 31450000 | 965  | 843 | 31400000 | 0.122625 | 0.041220401 |
| chr4 | 31400001 | 31500000 | 1004 | 823 | 31450000 | 0.214423 | 0.00124274  |
| chr4 | 31450001 | 31550000 | 1028 | 861 | 31500000 | 0.183383 | 0.004784184 |
| chr4 | 31550001 | 31650000 | 1034 | 896 | 31600000 | 0.134294 | 0.028637613 |
| chr4 | 31650001 | 31750000 | 1039 | 904 | 31700000 | 0.128429 | 0.034490003 |
| chr4 | 31700001 | 31800000 | 1048 | 876 | 31750000 | 0.186264 | 0.004251571 |
| chr4 | 31800001 | 31900000 | 871  | 756 | 31850000 | 0.131915 | 0.03090333  |
| chr4 | 32000001 | 32100000 | 992  | 850 | 32050000 | 0.150506 | 0.016609026 |
| chr4 | 32050001 | 32150000 | 1020 | 854 | 32100000 | 0.183889 | 0.004686506 |
| chr4 | 32150001 | 32250000 | 996  | 873 | 32200000 | 0.117792 | 0.047606098 |
| chr4 | 32200001 | 32300000 | 1015 | 872 | 32250000 | 0.146708 | 0.018946582 |
| chr4 | 32250001 | 32350000 | 1027 | 895 | 32300000 | 0.126105 | 0.037067549 |
| chr4 | 32300001 | 32400000 | 979  | 830 | 32350000 | 0.165826 | 0.009519733 |
| chr4 | 32350001 | 32450000 | 948  | 799 | 32400000 | 0.17432  | 0.006870298 |
| chr4 | 32400001 | 32500000 | 1014 | 833 | 32450000 | 0.211297 | 0.0014343   |
| chr4 | 32450001 | 32550000 | 1026 | 804 | 32500000 | 0.279392 | 4.30E-05    |
| chr4 | 32500001 | 32600000 | 1040 | 856 | 32550000 | 0.208529 | 0.001626167 |
| chr4 | 32700001 | 32800000 | 973  | 839 | 32750000 | 0.141397 | 0.022682439 |
| chr4 | 32750001 | 32850000 | 938  | 817 | 32800000 | 0.12688  | 0.036190842 |
| chr4 | 33450001 | 33550000 | 1054 | 914 | 33500000 | 0.133237 | 0.029626301 |
| chr4 | 33500001 | 33600000 | 983  | 862 | 33550000 | 0.117132 | 0.048537711 |
| chr4 | 33650001 | 33750000 | 959  | 834 | 33700000 | 0.129112 | 0.033761914 |

|      |          |          |      |      |          |          |             |
|------|----------|----------|------|------|----------|----------|-------------|
| chr4 | 33700001 | 33800000 | 1053 | 822  | 33750000 | 0.284923 | 3.12E-05    |
| chr4 | 33750001 | 33850000 | 962  | 758  | 33800000 | 0.271467 | 6.74E-05    |
| chr4 | 34000001 | 34100000 | 961  | 841  | 34050000 | 0.120059 | 0.044518224 |
| chr4 | 34050001 | 34150000 | 1052 | 886  | 34100000 | 0.175384 | 0.006589282 |
| chr4 | 34250001 | 34350000 | 1048 | 894  | 34300000 | 0.15692  | 0.013221661 |
| chr4 | 34450001 | 34550000 | 969  | 811  | 34500000 | 0.184423 | 0.004585454 |
| chr4 | 34500001 | 34600000 | 979  | 857  | 34550000 | 0.119642 | 0.045073814 |
| chr4 | 34550001 | 34650000 | 982  | 849  | 34600000 | 0.137587 | 0.025731806 |
| chr4 | 34600001 | 34700000 | 1022 | 851  | 34650000 | 0.191792 | 0.003376166 |
| chr4 | 34750001 | 34850000 | 771  | 638  | 34800000 | 0.200803 | 0.002292269 |
| chr4 | 34800001 | 34900000 | 904  | 673  | 34850000 | 0.353344 | 3.89E-07    |
| chr4 | 34850001 | 34950000 | 1061 | 832  | 34900000 | 0.278397 | 4.55E-05    |
| chr4 | 34900001 | 35000000 | 1044 | 907  | 34950000 | 0.130575 | 0.032242972 |
| chr4 | 34950001 | 35050000 | 1042 | 897  | 3.50E+07 | 0.143804 | 0.020918759 |
| chr4 | 35000001 | 35100000 | 1039 | 848  | 35050000 | 0.220688 | 0.00092762  |
| chr4 | 35050001 | 35150000 | 961  | 804  | 35100000 | 0.184969 | 0.00448404  |
| chr4 | 35150001 | 35250000 | 1009 | 854  | 35200000 | 0.168246 | 0.008685853 |
| chr4 | 35200001 | 35300000 | 1009 | 821  | 35250000 | 0.2251   | 0.000751839 |
| chr4 | 35250001 | 35350000 | 967  | 812  | 35300000 | 0.179664 | 0.005559677 |
| chr4 | 35300001 | 35400000 | 952  | 819  | 35350000 | 0.144726 | 0.02027408  |
| chr4 | 35500001 | 35600000 | 1051 | 870  | 35550000 | 0.200304 | 0.00234283  |
| chr4 | 35550001 | 35650000 | 1002 | 828  | 35600000 | 0.202808 | 0.002098946 |
| chr4 | 36800001 | 36900000 | 988  | 832  | 36850000 | 0.175556 | 0.006544999 |
| chr4 | 36850001 | 36950000 | 895  | 766  | 36900000 | 0.152172 | 0.015664426 |
| chr4 | 37050001 | 37150000 | 1004 | 874  | 37100000 | 0.127682 | 0.035301627 |
| chr4 | 37450001 | 37550000 | 985  | 864  | 37500000 | 0.116721 | 0.049124917 |
| chr4 | 37550001 | 37650000 | 909  | 942  | 37600000 | -0.12382 | 0.039432858 |
| chr4 | 38100001 | 38200000 | 1048 | 1119 | 38150000 | -0.16694 | 0.008959796 |
| chr4 | 38800001 | 38900000 | 971  | 806  | 38850000 | 0.19632  | 0.002784202 |
| chr4 | 38950001 | 39050000 | 961  | 830  | 3.90E+07 | 0.139053 | 0.024519653 |
| chr4 | 39000001 | 39100000 | 993  | 793  | 39050000 | 0.252101 | 0.00019309  |
| chr4 | 39050001 | 39150000 | 997  | 777  | 39100000 | 0.287307 | 2.72E-05    |
| chr4 | 39100001 | 39200000 | 926  | 765  | 39150000 | 0.203181 | 0.002064705 |
| chr4 | 39400001 | 39500000 | 874  | 755  | 39450000 | 0.138785 | 0.024737865 |
| chr4 | 39450001 | 39550000 | 868  | 740  | 39500000 | 0.157798 | 0.012808255 |
| chr4 | 39500001 | 39600000 | 813  | 664  | 39550000 | 0.2197   | 0.00097182  |
| chr4 | 39550001 | 39650000 | 788  | 686  | 39600000 | 0.127615 | 0.03537523  |
| chr4 | 39650001 | 39750000 | 783  | 680  | 39700000 | 0.131106 | 0.031706859 |
| chr4 | 39750001 | 39850000 | 860  | 713  | 39800000 | 0.198063 | 0.002582562 |
| chr4 | 39800001 | 39900000 | 881  | 763  | 39850000 | 0.135087 | 0.027913535 |
| chr4 | 40050001 | 40150000 | 856  | 706  | 40100000 | 0.205571 | 0.00185689  |
| chr4 | 40100001 | 40200000 | 937  | 775  | 40150000 | 0.201481 | 0.002225139 |
| chr4 | 40150001 | 40250000 | 986  | 865  | 40200000 | 0.116516 | 0.049419683 |
| chr4 | 40250001 | 40350000 | 857  | 897  | 40300000 | -0.13818 | 0.0249568   |
| chr4 | 40350001 | 40450000 | 953  | 826  | 40400000 | 0.133963 | 0.028944396 |
| chr4 | 40400001 | 40500000 | 975  | 851  | 40450000 | 0.123871 | 0.039691157 |
| chr4 | 40450001 | 40550000 | 911  | 791  | 40500000 | 0.131402 | 0.031411047 |

|      |          |          |      |      |          |          |             |
|------|----------|----------|------|------|----------|----------|-------------|
| chr4 | 40500001 | 40600000 | 884  | 748  | 40550000 | 0.168636 | 0.008557728 |
| chr4 | 40700001 | 40800000 | 868  | 755  | 40750000 | 0.128847 | 0.034043148 |
| chr4 | 41900001 | 42000000 | 926  | 787  | 41950000 | 0.162277 | 0.010869109 |
| chr4 | 42000001 | 42100000 | 933  | 817  | 42050000 | 0.119169 | 0.045710349 |
| chr4 | 42050001 | 42150000 | 985  | 861  | 42100000 | 0.121739 | 0.042335785 |
| chr4 | 42350001 | 42450000 | 1052 | 910  | 42400000 | 0.136824 | 0.026381401 |
| chr4 | 42600001 | 42700000 | 1080 | 876  | 42650000 | 0.229657 | 0.000603056 |
| chr4 | 42650001 | 42750000 | 1028 | 870  | 42700000 | 0.168381 | 0.00864138  |
| chr4 | 43150001 | 43250000 | 975  | 843  | 43200000 | 0.137498 | 0.025806857 |
| chr4 | 43200001 | 43300000 | 1031 | 868  | 43250000 | 0.175906 | 0.006455432 |
| chr4 | 43400001 | 43500000 | 914  | 790  | 43450000 | 0.13797  | 0.025410467 |
| chr4 | 43450001 | 43550000 | 941  | 778  | 43500000 | 0.202053 | 0.002169941 |
| chr4 | 43500001 | 43600000 | 975  | 824  | 43550000 | 0.170386 | 0.008003002 |
| chr4 | 43700001 | 43800000 | 991  | 842  | 43750000 | 0.162693 | 0.010702635 |
| chr4 | 43750001 | 43850000 | 1006 | 862  | 43800000 | 0.150499 | 0.01661295  |
| chr4 | 43800001 | 43900000 | 945  | 767  | 43850000 | 0.228716 | 0.000631334 |
| chr4 | 43850001 | 43950000 | 947  | 774  | 43900000 | 0.218659 | 0.001020528 |
| chr4 | 44000001 | 44100000 | 1021 | 888  | 44050000 | 0.12898  | 0.033901898 |
| chr4 | 45000001 | 45100000 | 918  | 785  | 45050000 | 0.15343  | 0.014982046 |
| chr4 | 45050001 | 45150000 | 955  | 806  | 45100000 | 0.172349 | 0.007418652 |
| chr4 | 45100001 | 45200000 | 975  | 829  | 45150000 | 0.161658 | 0.011120611 |
| chr4 | 45150001 | 45250000 | 992  | 849  | 45200000 | 0.152204 | 0.015646592 |
| chr4 | 45550001 | 45650000 | 1023 | 855  | 45600000 | 0.186438 | 0.004221196 |
| chr4 | 45600001 | 45700000 | 1009 | 819  | 45650000 | 0.228619 | 0.000634317 |
| chr4 | 45800001 | 45900000 | 933  | 812  | 45850000 | 0.128026 | 0.034926675 |
| chr4 | 46000001 | 46100000 | 958  | 836  | 46050000 | 0.124151 | 0.039354614 |
| chr4 | 46050001 | 46150000 | 1022 | 891  | 46100000 | 0.125526 | 0.037733317 |
| chr4 | 46650001 | 46750000 | 907  | 775  | 46700000 | 0.154534 | 0.014404195 |
| chr4 | 47100001 | 47200000 | 1115 | 967  | 47150000 | 0.133084 | 0.029771663 |
| chr4 | 47500001 | 47600000 | 1072 | 922  | 47550000 | 0.145094 | 0.020021641 |
| chr4 | 48500001 | 48600000 | 1111 | 956  | 48550000 | 0.144405 | 0.020496983 |
| chr4 | 48550001 | 48650000 | 1057 | 915  | 48600000 | 0.13576  | 0.027311612 |
| chr4 | 48600001 | 48700000 | 998  | 846  | 48650000 | 0.16601  | 0.009453744 |
| chr4 | 49000001 | 49100000 | 894  | 958  | 49050000 | -0.17212 | 0.007335433 |
| chr4 | 49050001 | 49150000 | 2164 | 2667 | 49100000 | -0.37389 | 7.49E-08    |
| chr4 | 49100001 | 49200000 | 2300 | 2824 | 49150000 | -0.36848 | 1.12E-07    |
| chr4 | 49150001 | 49250000 | 798  | 890  | 49200000 | -0.22979 | 0.000572742 |
| chr4 | 49250001 | 49350000 | 119  | 132  | 49300000 | -0.22195 | 0.000838843 |
| chr4 | 49300001 | 49400000 | 68   | 81   | 49350000 | -0.32476 | 2.37E-06    |
| chr4 | 49400001 | 49500000 | 5    | 1    | 49450000 | 2.249556 | 7.16E-109   |
| chr4 | 49450001 | 49550000 | 99   | 128  | 49500000 | -0.44302 | 2.94E-10    |
| chr4 | 49500001 | 49600000 | 116  | 150  | 49550000 | -0.44321 | 2.89E-10    |
| chr4 | 49550001 | 49650000 | 576  | 709  | 49600000 | -0.37209 | 8.56E-08    |
| chr4 | 49600001 | 49700000 | 1026 | 1271 | 49650000 | -0.38131 | 4.29E-08    |
| chr4 | 49650001 | 49750000 | 472  | 585  | 49700000 | -0.38202 | 4.07E-08    |
| chr4 | 52750001 | 52850000 | 900  | 957  | 52800000 | -0.16097 | 0.011219801 |
| chr4 | 52900001 | 53000000 | 907  | 972  | 52950000 | -0.17223 | 0.007305976 |

|      |          |          |      |      |          |          |             |
|------|----------|----------|------|------|----------|----------|-------------|
| chr4 | 53850001 | 53950000 | 1060 | 893  | 53900000 | 0.17496  | 0.006699941 |
| chr4 | 53900001 | 54000000 | 979  | 835  | 53950000 | 0.157161 | 0.013107173 |
| chr4 | 54150001 | 54250000 | 812  | 703  | 54200000 | 0.135583 | 0.027468635 |
| chr4 | 54200001 | 54300000 | 894  | 750  | 54250000 | 0.181012 | 0.005266491 |
| chr4 | 54300001 | 54400000 | 967  | 1002 | 54350000 | -0.12367 | 0.039616658 |
| chr4 | 54350001 | 54450000 | 1008 | 1057 | 54400000 | -0.14085 | 0.022834334 |
| chr4 | 54800001 | 54900000 | 970  | 785  | 54850000 | 0.23292  | 0.000513807 |
| chr4 | 54850001 | 54950000 | 1017 | 765  | 54900000 | 0.338416 | 1.08E-06    |
| chr4 | 56150001 | 56250000 | 843  | 871  | 56200000 | -0.11951 | 0.04491482  |
| chr4 | 56350001 | 56450000 | 975  | 828  | 56400000 | 0.1634   | 0.010425139 |
| chr4 | 57350001 | 57450000 | 885  | 771  | 57400000 | 0.126575 | 0.036533984 |
| chr4 | 58200001 | 58300000 | 970  | 1000 | 58250000 | -0.11632 | 0.049369026 |
| chr4 | 58650001 | 58750000 | 1037 | 885  | 58700000 | 0.156295 | 0.013523235 |
| chr4 | 58700001 | 58800000 | 917  | 734  | 58750000 | 0.24877  | 0.000229914 |
| chr4 | 58750001 | 58850000 | 835  | 712  | 58800000 | 0.157527 | 0.012934585 |
| chr4 | 59200001 | 59300000 | 869  | 761  | 59250000 | 0.119088 | 0.045820537 |
| chr4 | 59250001 | 59350000 | 896  | 737  | 59300000 | 0.209462 | 0.001559009 |
| chr4 | 59300001 | 59400000 | 958  | 839  | 59350000 | 0.118983 | 0.045963035 |
| chr4 | 59400001 | 59500000 | 957  | 828  | 59450000 | 0.136516 | 0.026647851 |
| chr4 | 59500001 | 59600000 | 1011 | 820  | 59550000 | 0.229715 | 0.000601332 |
| chr4 | 59550001 | 59650000 | 984  | 777  | 59600000 | 0.268372 | 8.01E-05    |
| chr4 | 59600001 | 59700000 | 975  | 813  | 59650000 | 0.189775 | 0.00367476  |
| chr4 | 59650001 | 59750000 | 865  | 723  | 59700000 | 0.186333 | 0.004239574 |
| chr4 | 59700001 | 59800000 | 420  | 360  | 59750000 | 0.150021 | 0.016892961 |
| chr4 | 59750001 | 59850000 | 610  | 492  | 59800000 | 0.237779 | 0.000403415 |
| chr4 | 59800001 | 59900000 | 1048 | 864  | 59850000 | 0.206164 | 0.001808385 |
| chr4 | 59850001 | 59950000 | 1002 | 862  | 59900000 | 0.144751 | 0.020257118 |
| chr4 | 60100001 | 60200000 | 1031 | 901  | 60150000 | 0.122074 | 0.041911331 |
| chr4 | 60250001 | 60350000 | 966  | 781  | 60300000 | 0.234329 | 0.000479215 |
| chr4 | 60300001 | 60400000 | 1008 | 823  | 60350000 | 0.22016  | 0.000951029 |
| chr4 | 60400001 | 60500000 | 883  | 762  | 60450000 | 0.140251 | 0.023566053 |
| chr4 | 60650001 | 60750000 | 920  | 761  | 60700000 | 0.201366 | 0.002236426 |
| chr4 | 60750001 | 60850000 | 972  | 843  | 60800000 | 0.133052 | 0.029802385 |
| chr4 | 60800001 | 60900000 | 1006 | 876  | 60850000 | 0.127256 | 0.03577216  |
| chr4 | 61250001 | 61350000 | 960  | 826  | 61300000 | 0.144521 | 0.020416171 |
| chr4 | 61400001 | 61500000 | 915  | 980  | 61450000 | -0.17138 | 0.007550536 |
| chr4 | 61500001 | 61600000 | 886  | 777  | 61550000 | 0.11702  | 0.048696326 |
| chr4 | 61600001 | 61700000 | 1030 | 896  | 61650000 | 0.128702 | 0.034197505 |
| chr4 | 61650001 | 61750000 | 938  | 818  | 61700000 | 0.125115 | 0.038211792 |
| chr4 | 62200001 | 62300000 | 942  | 809  | 62250000 | 0.147216 | 0.018618672 |
| chr4 | 62250001 | 62350000 | 1031 | 836  | 62300000 | 0.230098 | 0.00059021  |
| chr4 | 62300001 | 62400000 | 1075 | 901  | 62350000 | 0.182366 | 0.004986106 |
| chr4 | 62350001 | 62450000 | 1137 | 935  | 62400000 | 0.209822 | 0.001533798 |
| chr4 | 62400001 | 62500000 | 1106 | 893  | 62450000 | 0.236248 | 0.00043557  |
| chr4 | 62450001 | 62550000 | 969  | 845  | 62500000 | 0.125174 | 0.038143648 |
| chr4 | 62750001 | 62850000 | 922  | 803  | 62800000 | 0.126995 | 0.036062346 |
| chr4 | 62900001 | 63000000 | 1036 | 903  | 62950000 | 0.125854 | 0.03735451  |

|      |          |          |      |     |          |          |             |
|------|----------|----------|------|-----|----------|----------|-------------|
| chr4 | 63350001 | 63450000 | 986  | 856 | 63400000 | 0.131605 | 0.031208879 |
| chr4 | 63400001 | 63500000 | 933  | 798 | 63450000 | 0.153117 | 0.015149447 |
| chr4 | 63450001 | 63550000 | 931  | 803 | 63500000 | 0.141009 | 0.022978126 |
| chr4 | 63550001 | 63650000 | 907  | 763 | 63600000 | 0.177048 | 0.006170578 |
| chr4 | 63850001 | 63950000 | 929  | 805 | 63900000 | 0.134318 | 0.028615238 |
| chr4 | 64150001 | 64250000 | 953  | 793 | 64200000 | 0.192784 | 0.003237626 |
| chr4 | 64200001 | 64300000 | 982  | 832 | 64250000 | 0.166768 | 0.009187238 |
| chr4 | 64350001 | 64450000 | 961  | 801 | 64400000 | 0.190362 | 0.003585463 |
| chr4 | 64400001 | 64500000 | 944  | 753 | 64450000 | 0.253765 | 0.000176839 |
| chr4 | 64450001 | 64550000 | 1031 | 850 | 64500000 | 0.206138 | 0.001810481 |
| chr4 | 64500001 | 64600000 | 1129 | 930 | 64550000 | 0.207371 | 0.001713166 |
| chr4 | 64550001 | 64650000 | 1035 | 861 | 64600000 | 0.193174 | 0.0031845   |
| chr4 | 64700001 | 64800000 | 909  | 753 | 64750000 | 0.199259 | 0.002451988 |
| chr4 | 64750001 | 64850000 | 1006 | 809 | 64800000 | 0.242047 | 0.000325098 |
| chr4 | 64850001 | 64950000 | 947  | 812 | 64900000 | 0.149513 | 0.01719474  |
| chr4 | 64900001 | 65000000 | 968  | 765 | 64950000 | 0.267176 | 8.56E-05    |
| chr4 | 64950001 | 65050000 | 994  | 833 | 6.50E+07 | 0.182558 | 0.004947489 |
| chr4 | 65100001 | 65200000 | 1006 | 831 | 65150000 | 0.203338 | 0.002050387 |
| chr4 | 65150001 | 65250000 | 959  | 836 | 65200000 | 0.125656 | 0.037582904 |
| chr4 | 65200001 | 65300000 | 994  | 823 | 65250000 | 0.199982 | 0.002375981 |
| chr4 | 65250001 | 65350000 | 1058 | 839 | 65300000 | 0.262225 | 0.00011227  |
| chr4 | 65300001 | 65400000 | 969  | 850 | 65350000 | 0.116662 | 0.049209057 |
| chr4 | 65350001 | 65450000 | 927  | 786 | 65400000 | 0.165668 | 0.009576345 |
| chr4 | 65400001 | 65500000 | 938  | 787 | 65450000 | 0.180853 | 0.005300541 |
| chr4 | 65500001 | 65600000 | 894  | 760 | 65550000 | 0.161904 | 0.011020255 |
| chr4 | 65550001 | 65650000 | 1011 | 851 | 65600000 | 0.17618  | 0.006385904 |
| chr4 | 65900001 | 66000000 | 966  | 822 | 65950000 | 0.160513 | 0.011599816 |
| chr4 | 65950001 | 66050000 | 957  | 778 | 6.60E+07 | 0.226377 | 0.000707049 |
| chr4 | 66200001 | 66300000 | 1110 | 920 | 66250000 | 0.198482 | 0.002536075 |
| chr4 | 66400001 | 66500000 | 951  | 797 | 66450000 | 0.182494 | 0.004960299 |
| chr4 | 66450001 | 66550000 | 1002 | 858 | 66500000 | 0.151461 | 0.016061363 |
| chr4 | 66600001 | 66700000 | 985  | 830 | 66650000 | 0.174641 | 0.006784508 |
| chr4 | 66650001 | 66750000 | 987  | 854 | 66700000 | 0.136442 | 0.026712307 |
| chr4 | 66850001 | 66950000 | 957  | 822 | 66900000 | 0.147009 | 0.018751674 |
| chr4 | 66900001 | 67000000 | 966  | 775 | 66950000 | 0.245455 | 0.000273005 |
| chr4 | 67100001 | 67200000 | 970  | 799 | 67150000 | 0.207417 | 0.001709601 |
| chr4 | 67150001 | 67250000 | 1000 | 847 | 67200000 | 0.167194 | 0.009040034 |
| chr4 | 67350001 | 67450000 | 1015 | 857 | 67400000 | 0.171741 | 0.007595554 |
| chr4 | 67400001 | 67500000 | 1052 | 841 | 67450000 | 0.250585 | 0.000209103 |
| chr4 | 67450001 | 67550000 | 1051 | 885 | 67500000 | 0.175642 | 0.006522934 |
| chr4 | 67650001 | 67750000 | 1001 | 863 | 67700000 | 0.141638 | 0.022500681 |
| chr4 | 67750001 | 67850000 | 1004 | 881 | 67800000 | 0.116174 | 0.049915084 |
| chr4 | 67800001 | 67900000 | 982  | 834 | 67850000 | 0.163304 | 0.010462392 |
| chr4 | 68000001 | 68100000 | 828  | 874 | 68050000 | -0.15037 | 0.016456613 |
| chr4 | 68850001 | 68950000 | 983  | 816 | 68900000 | 0.19625  | 0.002792492 |
| chr4 | 69300001 | 69400000 | 770  | 621 | 69350000 | 0.237893 | 0.000401107 |
| chr4 | 69350001 | 69450000 | 380  | 319 | 69400000 | 0.180071 | 0.0054697   |



|      |          |          |      |     |          |          |             |
|------|----------|----------|------|-----|----------|----------|-------------|
| chr4 | 69500001 | 69600000 | 603  | 630 | 69550000 | -0.13557 | 0.02720003  |
| chr4 | 69600001 | 69700000 | 722  | 627 | 69650000 | 0.131162 | 0.031650847 |
| chr4 | 69650001 | 69750000 | 770  | 669 | 69700000 | 0.13048  | 0.032339823 |
| chr4 | 69800001 | 69900000 | 751  | 652 | 69850000 | 0.131569 | 0.031244473 |
| chr4 | 70000001 | 70100000 | 505  | 416 | 70050000 | 0.207328 | 0.001716477 |
| chr4 | 70100001 | 70200000 | 198  | 223 | 70150000 | -0.24392 | 0.000280111 |
| chr4 | 70550001 | 70650000 | 983  | 829 | 70600000 | 0.173448 | 0.007108414 |
| chr4 | 70600001 | 70700000 | 1027 | 883 | 70650000 | 0.145579 | 0.019693425 |
| chr4 | 70950001 | 71050000 | 1029 | 877 | 7.10E+07 | 0.158222 | 0.012612407 |
| chr4 | 71000001 | 71100000 | 994  | 868 | 71050000 | 0.123179 | 0.040534457 |
| chr4 | 71800001 | 71900000 | 831  | 704 | 71850000 | 0.166901 | 0.009140933 |
| chr4 | 71850001 | 71950000 | 769  | 659 | 71900000 | 0.150333 | 0.016709363 |
| chr4 | 71900001 | 72000000 | 785  | 684 | 71950000 | 0.126325 | 0.036817306 |
| chr4 | 72100001 | 72200000 | 1035 | 895 | 72150000 | 0.137299 | 0.025975052 |
| chr4 | 72200001 | 72300000 | 985  | 838 | 72250000 | 0.160802 | 0.011477364 |
| chr4 | 72250001 | 72350000 | 960  | 802 | 72300000 | 0.18706  | 0.004114066 |
| chr4 | 72550001 | 72650000 | 960  | 839 | 72600000 | 0.121992 | 0.042014612 |
| chr4 | 72800001 | 72900000 | 906  | 770 | 72850000 | 0.162281 | 0.01086748  |
| chr4 | 72850001 | 72950000 | 946  | 783 | 72900000 | 0.200456 | 0.002327272 |
| chr4 | 72900001 | 73000000 | 943  | 779 | 72950000 | 0.203263 | 0.002057238 |
| chr4 | 72950001 | 73050000 | 879  | 730 | 7.30E+07 | 0.195595 | 0.002872156 |
| chr4 | 73150001 | 73250000 | 1046 | 905 | 73200000 | 0.136521 | 0.026643511 |
| chr4 | 73700001 | 73800000 | 696  | 726 | 73750000 | -0.13325 | 0.029317775 |
| chr4 | 73950001 | 74050000 | 988  | 866 | 7.40E+07 | 0.117772 | 0.047634193 |
| chr4 | 74200001 | 74300000 | 917  | 794 | 74250000 | 0.135411 | 0.027622493 |
| chr4 | 74650001 | 74750000 | 1031 | 838 | 74700000 | 0.22665  | 0.000697783 |
| chr4 | 75250001 | 75350000 | 636  | 554 | 75300000 | 0.126769 | 0.036315375 |
| chr4 | 75450001 | 75550000 | 614  | 480 | 75500000 | 0.282832 | 3.53E-05    |
| chr4 | 75500001 | 75600000 | 1054 | 906 | 75550000 | 0.14592  | 0.019465172 |
| chr4 | 76650001 | 76750000 | 938  | 822 | 76700000 | 0.118078 | 0.047207992 |
| chr4 | 76700001 | 76800000 | 925  | 786 | 76750000 | 0.162552 | 0.010758682 |
| chr4 | 77300001 | 77400000 | 1028 | 883 | 77350000 | 0.146983 | 0.018768198 |
| chr4 | 77350001 | 77450000 | 1049 | 887 | 77400000 | 0.169637 | 0.008236515 |
| chr4 | 78500001 | 78600000 | 1037 | 899 | 78550000 | 0.133651 | 0.029235558 |
| chr4 | 78550001 | 78650000 | 956  | 836 | 78600000 | 0.121136 | 0.043108734 |
| chr4 | 78700001 | 78800000 | 883  | 913 | 78750000 | -0.12057 | 0.043509799 |
| chr4 | 79100001 | 79200000 | 981  | 824 | 79150000 | 0.179237 | 0.005655612 |
| chr4 | 80000001 | 80100000 | 1013 | 880 | 80050000 | 0.130687 | 0.032129643 |
| chr4 | 80250001 | 80350000 | 1144 | 980 | 80300000 | 0.150862 | 0.016403101 |
| chr4 | 80300001 | 80400000 | 1104 | 932 | 80350000 | 0.171967 | 0.007529486 |
| chr4 | 80700001 | 80800000 | 1039 | 888 | 80750000 | 0.154192 | 0.014581077 |
| chr4 | 80750001 | 80850000 | 1075 | 908 | 80800000 | 0.171201 | 0.007755761 |
| chr4 | 80800001 | 80900000 | 928  | 781 | 80850000 | 0.17643  | 0.006323104 |
| chr4 | 80850001 | 80950000 | 908  | 769 | 80900000 | 0.167337 | 0.008991305 |
| chr4 | 80900001 | 81000000 | 1053 | 920 | 80950000 | 0.122428 | 0.041465914 |
| chr4 | 81000001 | 81100000 | 1118 | 966 | 81050000 | 0.138453 | 0.025009607 |
| chr4 | 81300001 | 81400000 | 914  | 801 | 81350000 | 0.11802  | 0.04728812  |

|      |          |          |      |     |          |          |             |
|------|----------|----------|------|-----|----------|----------|-------------|
| chr4 | 81350001 | 81450000 | 1043 | 897 | 81400000 | 0.145187 | 0.019958281 |
| chr4 | 81400001 | 81500000 | 1093 | 908 | 81450000 | 0.195157 | 0.00292646  |
| chr4 | 81700001 | 81800000 | 911  | 792 | 81750000 | 0.129579 | 0.033270838 |
| chr4 | 81750001 | 81850000 | 984  | 845 | 81800000 | 0.147335 | 0.01854212  |
| chr4 | 83950001 | 84050000 | 943  | 793 | 8.40E+07 | 0.177565 | 0.006045249 |
| chr4 | 84050001 | 84150000 | 944  | 820 | 84100000 | 0.130791 | 0.032024017 |
| chr4 | 84750001 | 84850000 | 1077 | 938 | 84800000 | 0.126987 | 0.03607166  |
| chr4 | 84800001 | 84900000 | 991  | 835 | 84850000 | 0.174737 | 0.006758898 |
| chr4 | 85000001 | 85100000 | 959  | 840 | 85050000 | 0.11877  | 0.046254026 |
| chr4 | 85050001 | 85150000 | 973  | 839 | 85100000 | 0.141397 | 0.022682439 |
| chr4 | 85450001 | 85550000 | 973  | 849 | 85500000 | 0.124303 | 0.039172013 |
| chr4 | 86300001 | 86400000 | 1089 | 933 | 86350000 | 0.150683 | 0.016506002 |
| chr4 | 86350001 | 86450000 | 1003 | 850 | 86400000 | 0.166415 | 0.009310497 |
| chr4 | 86800001 | 86900000 | 964  | 842 | 86850000 | 0.122841 | 0.040951337 |
| chr4 | 87000001 | 87100000 | 951  | 827 | 87050000 | 0.129186 | 0.033683122 |
| chr4 | 87100001 | 87200000 | 922  | 763 | 87150000 | 0.200712 | 0.002301387 |
| chr4 | 87150001 | 87250000 | 953  | 790 | 87200000 | 0.198252 | 0.002561517 |
| chr4 | 87300001 | 87400000 | 868  | 742 | 87350000 | 0.153904 | 0.014731522 |
| chr4 | 87700001 | 87800000 | 861  | 719 | 87750000 | 0.18765  | 0.004014882 |
| chr4 | 87900001 | 88000000 | 964  | 836 | 87950000 | 0.133158 | 0.029700954 |
| chr4 | 87950001 | 88050000 | 1070 | 884 | 8.80E+07 | 0.203121 | 0.002070177 |
| chr4 | 88000001 | 88100000 | 1030 | 847 | 88050000 | 0.209839 | 0.001532653 |
| chr4 | 88250001 | 88350000 | 790  | 669 | 88300000 | 0.167475 | 0.008944446 |
| chr4 | 88650001 | 88750000 | 863  | 747 | 88700000 | 0.135881 | 0.027204879 |
| chr4 | 89850001 | 89950000 | 1011 | 872 | 89900000 | 0.141011 | 0.022976764 |
| chr4 | 89900001 | 90000000 | 982  | 825 | 89950000 | 0.178957 | 0.005719241 |
| chr4 | 90450001 | 90550000 | 1047 | 898 | 90500000 | 0.149102 | 0.017442165 |
| chr4 | 90500001 | 90600000 | 969  | 830 | 90550000 | 0.151014 | 0.016315917 |
| chr4 | 90550001 | 90650000 | 969  | 828 | 90600000 | 0.154494 | 0.014424953 |
| chr4 | 90600001 | 90700000 | 1030 | 877 | 90650000 | 0.159624 | 0.011984173 |
| chr4 | 90650001 | 90750000 | 1012 | 874 | 90700000 | 0.139132 | 0.02445574  |
| chr4 | 90700001 | 90800000 | 991  | 851 | 90750000 | 0.147354 | 0.018530016 |
| chr4 | 90750001 | 90850000 | 1013 | 865 | 90800000 | 0.15549  | 0.013919842 |
| chr4 | 90800001 | 90900000 | 1016 | 842 | 90850000 | 0.198636 | 0.002519155 |
| chr4 | 91150001 | 91250000 | 935  | 787 | 91200000 | 0.176231 | 0.006373121 |
| chr4 | 91200001 | 91300000 | 1028 | 889 | 91250000 | 0.137213 | 0.026048447 |
| chr4 | 91250001 | 91350000 | 1009 | 885 | 91300000 | 0.116805 | 0.049003907 |
| chr4 | 91300001 | 91400000 | 995  | 873 | 91350000 | 0.116343 | 0.049669144 |
| chr4 | 91350001 | 91450000 | 962  | 800 | 91400000 | 0.193665 | 0.003118745 |
| chr4 | 91400001 | 91500000 | 929  | 739 | 91450000 | 0.257732 | 0.000143125 |
| chr4 | 91450001 | 91550000 | 1004 | 860 | 91500000 | 0.150979 | 0.016335751 |
| chr4 | 91600001 | 91700000 | 949  | 798 | 91650000 | 0.177648 | 0.006025492 |
| chr4 | 91650001 | 91750000 | 1016 | 869 | 91700000 | 0.153101 | 0.01515805  |
| chr4 | 91700001 | 91800000 | 1016 | 888 | 91750000 | 0.121897 | 0.04213464  |
| chr4 | 91750001 | 91850000 | 1009 | 885 | 91800000 | 0.116805 | 0.049003907 |
| chr4 | 91850001 | 91950000 | 993  | 862 | 91900000 | 0.131734 | 0.031081279 |
| chr4 | 92000001 | 92100000 | 770  | 629 | 92050000 | 0.219427 | 0.000984411 |

|      |          |          |      |     |           |          |             |
|------|----------|----------|------|-----|-----------|----------|-------------|
| chr4 | 92050001 | 92150000 | 817  | 695 | 92100000  | 0.160951 | 0.011414343 |
| chr4 | 92100001 | 92200000 | 946  | 828 | 92150000  | 0.119838 | 0.044812284 |
| chr4 | 92300001 | 92400000 | 849  | 741 | 92350000  | 0.123919 | 0.039633312 |
| chr4 | 92400001 | 92500000 | 919  | 790 | 92450000  | 0.14584  | 0.019518308 |
| chr4 | 92450001 | 92550000 | 989  | 783 | 92500000  | 0.264586 | 9.87E-05    |
| chr4 | 92500001 | 92600000 | 964  | 829 | 92550000  | 0.145289 | 0.019889149 |
| chr4 | 92750001 | 92850000 | 972  | 828 | 92800000  | 0.158954 | 0.012281076 |
| chr4 | 92800001 | 92900000 | 980  | 826 | 92850000  | 0.174268 | 0.006884182 |
| chr4 | 92950001 | 93050000 | 969  | 806 | 9.30E+07  | 0.193345 | 0.003161444 |
| chr4 | 93000001 | 93100000 | 1032 | 860 | 93050000  | 0.190663 | 0.003540577 |
| chr4 | 93050001 | 93150000 | 954  | 818 | 93100000  | 0.149517 | 0.01719251  |
| chr4 | 93300001 | 93400000 | 1000 | 849 | 93350000  | 0.163792 | 0.010273895 |
| chr4 | 93450001 | 93550000 | 1009 | 856 | 93500000  | 0.164872 | 0.009867207 |
| chr4 | 93800001 | 93900000 | 884  | 733 | 93850000  | 0.197861 | 0.002605164 |
| chr4 | 93900001 | 94000000 | 989  | 851 | 93950000  | 0.14444  | 0.020472574 |
| chr4 | 93950001 | 94050000 | 996  | 847 | 9.40E+07  | 0.161412 | 0.011222198 |
| chr4 | 94200001 | 94300000 | 1060 | 930 | 94250000  | 0.11639  | 0.049601461 |
| chr4 | 94250001 | 94350000 | 1131 | 963 | 94300000  | 0.159619 | 0.011986086 |
| chr4 | 94450001 | 94550000 | 936  | 774 | 94500000  | 0.201803 | 0.00219388  |
| chr4 | 94500001 | 94600000 | 863  | 704 | 94550000  | 0.221413 | 0.000896326 |
| chr4 | 94550001 | 94650000 | 878  | 751 | 94600000  | 0.153036 | 0.015192631 |
| chr4 | 95400001 | 95500000 | 998  | 836 | 95450000  | 0.183165 | 0.00482687  |
| chr4 | 95650001 | 95750000 | 975  | 843 | 95700000  | 0.137498 | 0.025806857 |
| chr4 | 95700001 | 95800000 | 889  | 771 | 95750000  | 0.133081 | 0.029774861 |
| chr4 | 95800001 | 95900000 | 1036 | 900 | 95850000  | 0.130655 | 0.03216178  |
| chr4 | 95850001 | 95950000 | 1019 | 870 | 95900000  | 0.155695 | 0.013818017 |
| chr4 | 96200001 | 96300000 | 1046 | 916 | 96250000  | 0.119092 | 0.045815619 |
| chr4 | 96250001 | 96350000 | 1068 | 904 | 96300000  | 0.168145 | 0.008719393 |
| chr4 | 96550001 | 96650000 | 1022 | 877 | 96600000  | 0.148375 | 0.01788813  |
| chr4 | 96950001 | 97050000 | 1051 | 916 | 9.70E+07  | 0.125971 | 0.037220182 |
| chr4 | 97650001 | 97750000 | 1034 | 881 | 97700000  | 0.15865  | 0.012417553 |
| chr4 | 97800001 | 97900000 | 1002 | 866 | 97850000  | 0.138072 | 0.025325414 |
| chr4 | 97850001 | 97950000 | 1064 | 909 | 97900000  | 0.154774 | 0.014281385 |
| chr4 | 98250001 | 98350000 | 900  | 766 | 98300000  | 0.160209 | 0.011730073 |
| chr4 | 99250001 | 99350000 | 913  | 796 | 99300000  | 0.125475 | 0.037792953 |
| chr4 | 99750001 | 99850000 | 917  | 786 | 99800000  | 0.150021 | 0.016892961 |
| chr4 | 99800001 | 99900000 | 906  | 790 | 99850000  | 0.125287 | 0.038011642 |
| chr4 | 1.01E+08 | 1.01E+08 | 1011 | 874 | 100750000 | 0.137706 | 0.025631324 |
| chr4 | 1.01E+08 | 1.01E+08 | 1055 | 882 | 101150000 | 0.186021 | 0.004294439 |
| chr4 | 1.01E+08 | 1.01E+08 | 1046 | 912 | 101200000 | 0.125405 | 0.03787344  |
| chr4 | 1.02E+08 | 1.02E+08 | 1064 | 903 | 101600000 | 0.164328 | 0.010069976 |
| chr4 | 1.02E+08 | 1.02E+08 | 1077 | 943 | 101650000 | 0.119317 | 0.045510837 |
| chr4 | 1.02E+08 | 1.02E+08 | 1014 | 866 | 102050000 | 0.155247 | 0.014041823 |
| chr4 | 1.02E+08 | 1.02E+08 | 831  | 713 | 102350000 | 0.148575 | 0.017764619 |
| chr4 | 1.03E+08 | 1.03E+08 | 1006 | 859 | 102750000 | 0.155528 | 0.013900816 |
| chr4 | 1.03E+08 | 1.03E+08 | 991  | 790 | 102800000 | 0.254661 | 0.000168635 |
| chr4 | 1.03E+08 | 1.03E+08 | 989  | 843 | 102850000 | 0.158066 | 0.01268424  |

|      |          |          |      |      |           |          |             |
|------|----------|----------|------|------|-----------|----------|-------------|
| chr4 | 1.03E+08 | 1.03E+08 | 1019 | 877  | 102950000 | 0.144134 | 0.020686287 |
| chr4 | 1.03E+08 | 1.04E+08 | 1106 | 933  | 103500000 | 0.173031 | 0.007224788 |
| chr4 | 1.04E+08 | 1.04E+08 | 1130 | 965  | 103550000 | 0.15535  | 0.013989993 |
| chr4 | 1.05E+08 | 1.05E+08 | 881  | 730  | 104600000 | 0.198874 | 0.002493343 |
| chr4 | 1.05E+08 | 1.05E+08 | 913  | 755  | 104750000 | 0.201766 | 0.002197425 |
| chr4 | 1.05E+08 | 1.05E+08 | 926  | 810  | 105150000 | 0.120719 | 0.043650603 |
| chr4 | 1.05E+08 | 1.05E+08 | 941  | 808  | 105200000 | 0.147468 | 0.018457665 |
| chr4 | 1.06E+08 | 1.06E+08 | 987  | 827  | 105650000 | 0.182791 | 0.004900834 |
| chr4 | 1.06E+08 | 1.06E+08 | 938  | 819  | 105700000 | 0.123353 | 0.040321551 |
| chr4 | 1.07E+08 | 1.07E+08 | 1034 | 889  | 107250000 | 0.145609 | 0.019673242 |
| chr4 | 1.07E+08 | 1.07E+08 | 976  | 835  | 107300000 | 0.152733 | 0.015356576 |
| chr4 | 1.07E+08 | 1.07E+08 | 979  | 828  | 107350000 | 0.169306 | 0.008341445 |
| chr4 | 1.08E+08 | 1.08E+08 | 988  | 815  | 107550000 | 0.205339 | 0.00187616  |
| chr4 | 1.08E+08 | 1.08E+08 | 888  | 722  | 107600000 | 0.226189 | 0.000713483 |
| chr4 | 1.08E+08 | 1.08E+08 | 948  | 790  | 107650000 | 0.190663 | 0.003540577 |
| chr4 | 1.08E+08 | 1.08E+08 | 1038 | 882  | 107700000 | 0.162584 | 0.010745987 |
| chr4 | 1.08E+08 | 1.08E+08 | 918  | 775  | 107850000 | 0.171926 | 0.007541295 |
| chr4 | 1.08E+08 | 1.08E+08 | 926  | 754  | 107900000 | 0.224076 | 0.000789658 |
| chr4 | 1.08E+08 | 1.08E+08 | 1036 | 860  | 107950000 | 0.196244 | 0.002793311 |
| chr4 | 1.08E+08 | 1.09E+08 | 1035 | 879  | 108450000 | 0.163324 | 0.010454584 |
| chr4 | 1.09E+08 | 1.09E+08 | 826  | 857  | 108850000 | -0.12553 | 0.03741718  |
| chr4 | 1.1E+08  | 1.1E+08  | 919  | 784  | 109650000 | 0.156839 | 0.013260277 |
| chr4 | 1.11E+08 | 1.11E+08 | 875  | 749  | 110550000 | 0.151946 | 0.015789785 |
| chr4 | 1.11E+08 | 1.11E+08 | 966  | 815  | 1.11E+08  | 0.172851 | 0.007275345 |
| chr4 | 1.11E+08 | 1.11E+08 | 997  | 813  | 111050000 | 0.221966 | 0.000873134 |
| chr4 | 1.11E+08 | 1.11E+08 | 865  | 755  | 111200000 | 0.123852 | 0.039714833 |
| chr4 | 1.11E+08 | 1.11E+08 | 881  | 763  | 111400000 | 0.135087 | 0.027913535 |
| chr4 | 1.11E+08 | 1.12E+08 | 1022 | 847  | 111450000 | 0.19859  | 0.00252429  |
| chr4 | 1.12E+08 | 1.12E+08 | 993  | 864  | 111700000 | 0.128391 | 0.034531537 |
| chr4 | 1.12E+08 | 1.12E+08 | 1089 | 909  | 111900000 | 0.18828  | 0.003911182 |
| chr4 | 1.12E+08 | 1.12E+08 | 1034 | 869  | 111950000 | 0.178436 | 0.005839333 |
| chr4 | 1.12E+08 | 1.12E+08 | 877  | 768  | 1.12E+08  | 0.119099 | 0.045805872 |
| chr4 | 1.12E+08 | 1.12E+08 | 831  | 726  | 112050000 | 0.122507 | 0.041366814 |
| chr4 | 1.12E+08 | 1.12E+08 | 1013 | 866  | 112200000 | 0.153823 | 0.014773839 |
| chr4 | 1.12E+08 | 1.12E+08 | 954  | 837  | 112250000 | 0.11639  | 0.049601461 |
| chr4 | 1.13E+08 | 1.13E+08 | 968  | 816  | 112800000 | 0.174066 | 0.006938806 |
| chr4 | 1.13E+08 | 1.13E+08 | 922  | 765  | 112850000 | 0.196935 | 0.002711424 |
| chr4 | 1.13E+08 | 1.13E+08 | 1063 | 912  | 113200000 | 0.148664 | 0.017709593 |
| chr4 | 1.14E+08 | 1.14E+08 | 967  | 1007 | 114100000 | -0.13085 | 0.031666372 |
| chr4 | 1.15E+08 | 1.15E+08 | 1044 | 907  | 114600000 | 0.130575 | 0.032242972 |
| chr4 | 1.15E+08 | 1.15E+08 | 990  | 867  | 115050000 | 0.119025 | 0.045906353 |
| chr4 | 1.15E+08 | 1.15E+08 | 984  | 862  | 115200000 | 0.118599 | 0.046488373 |
| chr4 | 1.15E+08 | 1.16E+08 | 915  | 787  | 115450000 | 0.145036 | 0.020061332 |
| chr4 | 1.16E+08 | 1.16E+08 | 1003 | 867  | 115550000 | 0.137846 | 0.025513958 |
| chr4 | 1.16E+08 | 1.16E+08 | 1035 | 908  | 115600000 | 0.116495 | 0.049449899 |
| chr4 | 1.16E+08 | 1.16E+08 | 931  | 794  | 116100000 | 0.15727  | 0.013055372 |
| chr4 | 1.16E+08 | 1.16E+08 | 988  | 866  | 116250000 | 0.117772 | 0.047634193 |

|      |          |          |      |      |           |          |             |
|------|----------|----------|------|------|-----------|----------|-------------|
| chr4 | 1.16E+08 | 1.16E+08 | 964  | 832  | 116300000 | 0.140078 | 0.02370173  |
| chr4 | 1.16E+08 | 1.17E+08 | 1010 | 838  | 116450000 | 0.196961 | 0.002708372 |
| chr4 | 1.16E+08 | 1.17E+08 | 1037 | 907  | 116500000 | 0.12087  | 0.043453738 |
| chr4 | 1.17E+08 | 1.17E+08 | 987  | 829  | 116600000 | 0.179306 | 0.005639982 |
| chr4 | 1.17E+08 | 1.17E+08 | 989  | 815  | 116650000 | 0.206799 | 0.001757722 |
| chr4 | 1.17E+08 | 1.17E+08 | 975  | 842  | 116700000 | 0.13921  | 0.024392879 |
| chr4 | 1.17E+08 | 1.17E+08 | 957  | 839  | 116800000 | 0.117476 | 0.048049932 |
| chr4 | 1.17E+08 | 1.17E+08 | 932  | 813  | 116850000 | 0.124703 | 0.03869723  |
| chr4 | 1.17E+08 | 1.17E+08 | 936  | 763  | 117350000 | 0.222454 | 0.000853157 |
| chr4 | 1.17E+08 | 1.17E+08 | 1072 | 838  | 117400000 | 0.282911 | 3.51E-05    |
| chr4 | 1.17E+08 | 1.18E+08 | 1078 | 875  | 117450000 | 0.22863  | 0.000633964 |
| chr4 | 1.17E+08 | 1.18E+08 | 1039 | 865  | 117500000 | 0.192052 | 0.003339394 |
| chr4 | 1.18E+08 | 1.18E+08 | 950  | 790  | 117700000 | 0.193703 | 0.003113715 |
| chr4 | 1.18E+08 | 1.18E+08 | 979  | 822  | 117750000 | 0.179799 | 0.005529829 |
| chr4 | 1.18E+08 | 1.18E+08 | 1036 | 874  | 118050000 | 0.172947 | 0.007248321 |
| chr4 | 1.18E+08 | 1.18E+08 | 1025 | 883  | 118100000 | 0.142767 | 0.021663841 |
| chr4 | 1.18E+08 | 1.18E+08 | 894  | 779  | 118150000 | 0.12628  | 0.036868242 |
| chr4 | 1.18E+08 | 1.18E+08 | 898  | 749  | 118200000 | 0.189378 | 0.003736271 |
| chr4 | 1.18E+08 | 1.18E+08 | 1015 | 861  | 118250000 | 0.165023 | 0.009811441 |
| chr4 | 1.18E+08 | 1.18E+08 | 1064 | 884  | 118300000 | 0.195008 | 0.002945206 |
| chr4 | 1.18E+08 | 1.18E+08 | 1094 | 869  | 118350000 | 0.259813 | 0.000127959 |
| chr4 | 1.19E+08 | 1.19E+08 | 1061 | 865  | 118700000 | 0.222281 | 0.000860194 |
| chr4 | 1.19E+08 | 1.19E+08 | 1088 | 884  | 118750000 | 0.227189 | 0.000679876 |
| chr4 | 1.19E+08 | 1.19E+08 | 982  | 828  | 118900000 | 0.17372  | 0.007033129 |
| chr4 | 1.19E+08 | 1.19E+08 | 79   | 87   | 119400000 | -0.21153 | 0.001369059 |
| chr4 | 1.19E+08 | 1.2E+08  | 104  | 115  | 119450000 | -0.21742 | 0.001040346 |
| chr4 | 1.19E+08 | 1.2E+08  | 205  | 179  | 119500000 | 0.123293 | 0.040395189 |
| chr4 | 1.2E+08  | 1.2E+08  | 249  | 210  | 119550000 | 0.173385 | 0.007125864 |
| chr4 | 1.2E+08  | 1.2E+08  | 1021 | 883  | 120050000 | 0.137126 | 0.02612302  |
| chr4 | 1.2E+08  | 1.2E+08  | 985  | 859  | 120100000 | 0.125094 | 0.038236956 |
| chr4 | 1.2E+08  | 1.2E+08  | 581  | 608  | 120400000 | -0.1379  | 0.025188642 |
| chr4 | 1.2E+08  | 1.21E+08 | 938  | 970  | 120450000 | -0.12077 | 0.043255038 |
| chr4 | 1.21E+08 | 1.21E+08 | 1000 | 877  | 120650000 | 0.116979 | 0.048754566 |
| chr4 | 1.21E+08 | 1.21E+08 | 1031 | 903  | 120700000 | 0.118875 | 0.0461107   |
| chr4 | 1.21E+08 | 1.21E+08 | 923  | 791  | 120900000 | 0.150281 | 0.016739879 |
| chr4 | 1.21E+08 | 1.21E+08 | 992  | 861  | 121050000 | 0.131955 | 0.030863649 |
| chr4 | 1.21E+08 | 1.21E+08 | 1047 | 904  | 121100000 | 0.139495 | 0.024164178 |
| chr4 | 1.21E+08 | 1.21E+08 | 1022 | 853  | 121150000 | 0.188406 | 0.003890775 |
| chr4 | 1.21E+08 | 1.21E+08 | 1002 | 859  | 121200000 | 0.149781 | 0.01703501  |
| chr4 | 1.21E+08 | 1.21E+08 | 994  | 865  | 121300000 | 0.128174 | 0.034765635 |
| chr4 | 1.21E+08 | 1.22E+08 | 935  | 800  | 121450000 | 0.152595 | 0.015432047 |
| chr4 | 1.23E+08 | 1.23E+08 | 965  | 1007 | 122600000 | -0.13383 | 0.028773364 |
| chr4 | 1.23E+08 | 1.23E+08 | 924  | 997  | 122650000 | -0.18207 | 0.00492872  |
| chr4 | 1.23E+08 | 1.23E+08 | 938  | 1002 | 122700000 | -0.16759 | 0.008739507 |
| chr4 | 1.23E+08 | 1.23E+08 | 952  | 827  | 123250000 | 0.130702 | 0.032113914 |
| chr4 | 1.23E+08 | 1.23E+08 | 978  | 833  | 123300000 | 0.159146 | 0.012195163 |
| chr4 | 1.23E+08 | 1.23E+08 | 884  | 752  | 123350000 | 0.160942 | 0.011418291 |

|      |          |          |      |      |           |          |             |
|------|----------|----------|------|------|-----------|----------|-------------|
| chr4 | 1.23E+08 | 1.23E+08 | 800  | 693  | 123400000 | 0.134773 | 0.02819853  |
| chr4 | 1.24E+08 | 1.25E+08 | 1013 | 835  | 124500000 | 0.206414 | 0.001788235 |
| chr4 | 1.25E+08 | 1.25E+08 | 980  | 796  | 124550000 | 0.227642 | 0.00066513  |
| chr4 | 1.25E+08 | 1.25E+08 | 824  | 703  | 124600000 | 0.156748 | 0.013304167 |
| chr4 | 1.25E+08 | 1.25E+08 | 877  | 747  | 124650000 | 0.159097 | 0.012217156 |
| chr4 | 1.26E+08 | 1.26E+08 | 1007 | 858  | 125750000 | 0.158642 | 0.01242123  |
| chr4 | 1.26E+08 | 1.26E+08 | 1017 | 843  | 125800000 | 0.198343 | 0.002551374 |
| chr4 | 1.26E+08 | 1.26E+08 | 1025 | 833  | 125850000 | 0.226864 | 0.000690632 |
| chr4 | 1.26E+08 | 1.26E+08 | 1062 | 904  | 1.26E+08  | 0.160017 | 0.011812738 |
| chr4 | 1.26E+08 | 1.26E+08 | 1021 | 858  | 126050000 | 0.178562 | 0.005810258 |
| chr4 | 1.26E+08 | 1.26E+08 | 1050 | 909  | 126350000 | 0.135665 | 0.027395588 |
| chr4 | 1.27E+08 | 1.27E+08 | 1069 | 903  | 126600000 | 0.171092 | 0.007788298 |
| chr4 | 1.27E+08 | 1.27E+08 | 1066 | 862  | 126650000 | 0.234076 | 0.000485264 |
| chr4 | 1.27E+08 | 1.27E+08 | 988  | 809  | 126700000 | 0.216    | 0.001155313 |
| chr4 | 1.27E+08 | 1.27E+08 | 970  | 847  | 126750000 | 0.123251 | 0.040446114 |
| chr4 | 1.27E+08 | 1.27E+08 | 1057 | 924  | 126900000 | 0.121639 | 0.042463055 |
| chr4 | 1.27E+08 | 1.27E+08 | 841  | 714  | 127100000 | 0.16381  | 0.010266927 |
| chr4 | 1.27E+08 | 1.27E+08 | 977  | 841  | 127150000 | 0.143881 | 0.02086404  |
| chr4 | 1.27E+08 | 1.27E+08 | 1055 | 904  | 127200000 | 0.150477 | 0.016625868 |
| chr4 | 1.27E+08 | 1.27E+08 | 1047 | 843  | 127250000 | 0.240285 | 0.00035553  |
| chr4 | 1.27E+08 | 1.27E+08 | 1031 | 812  | 127300000 | 0.272121 | 6.50E-05    |
| chr4 | 1.27E+08 | 1.27E+08 | 1042 | 857  | 127350000 | 0.209616 | 0.001548171 |
| chr4 | 1.28E+08 | 1.28E+08 | 1063 | 887  | 127650000 | 0.188764 | 0.003833218 |
| chr4 | 1.28E+08 | 1.28E+08 | 1000 | 858  | 127700000 | 0.148579 | 0.017762127 |
| chr4 | 1.28E+08 | 1.28E+08 | 924  | 805  | 127750000 | 0.126532 | 0.036582001 |
| chr4 | 1.28E+08 | 1.28E+08 | 891  | 765  | 127900000 | 0.147594 | 0.01837747  |
| chr4 | 1.28E+08 | 1.28E+08 | 915  | 778  | 127950000 | 0.16163  | 0.011132335 |
| chr4 | 1.28E+08 | 1.28E+08 | 971  | 813  | 1.28E+08  | 0.183844 | 0.004695164 |
| chr4 | 1.28E+08 | 1.28E+08 | 1026 | 880  | 128050000 | 0.149084 | 0.017453561 |
| chr4 | 1.28E+08 | 1.28E+08 | 996  | 862  | 128100000 | 0.136086 | 0.027023744 |
| chr4 | 1.28E+08 | 1.28E+08 | 1064 | 926  | 128300000 | 0.128042 | 0.034908519 |
| chr4 | 1.28E+08 | 1.28E+08 | 913  | 787  | 128350000 | 0.141879 | 0.022319261 |
| chr4 | 1.28E+08 | 1.28E+08 | 865  | 734  | 128400000 | 0.164548 | 0.009987491 |
| chr4 | 1.29E+08 | 1.29E+08 | 896  | 783  | 128550000 | 0.122115 | 0.041859466 |
| chr4 | 1.29E+08 | 1.29E+08 | 854  | 745  | 128900000 | 0.124624 | 0.038790727 |
| chr4 | 1.29E+08 | 1.29E+08 | 790  | 687  | 128950000 | 0.129171 | 0.03369944  |
| chr4 | 1.29E+08 | 1.29E+08 | 889  | 777  | 129150000 | 0.121897 | 0.04213464  |
| chr4 | 1.29E+08 | 1.29E+08 | 1009 | 1051 | 129250000 | -0.13121 | 0.031304797 |
| chr4 | 1.3E+08  | 1.3E+08  | 938  | 805  | 129550000 | 0.148227 | 0.017979592 |
| chr4 | 1.3E+08  | 1.3E+08  | 918  | 735  | 129600000 | 0.248378 | 0.000234653 |
| chr4 | 1.3E+08  | 1.3E+08  | 909  | 758  | 129650000 | 0.189711 | 0.003684676 |
| chr4 | 1.3E+08  | 1.3E+08  | 942  | 796  | 129700000 | 0.170587 | 0.007941434 |
| chr4 | 1.3E+08  | 1.3E+08  | 964  | 832  | 129900000 | 0.140078 | 0.02370173  |
| chr4 | 1.31E+08 | 1.31E+08 | 862  | 893  | 130750000 | -0.12334 | 0.040008693 |
| chr4 | 1.31E+08 | 1.31E+08 | 1017 | 866  | 131100000 | 0.159509 | 0.012034612 |
| chr4 | 1.31E+08 | 1.31E+08 | 1047 | 886  | 131150000 | 0.168511 | 0.008598707 |
| chr4 | 1.31E+08 | 1.31E+08 | 1017 | 874  | 131200000 | 0.146243 | 0.019251372 |

|      |          |          |      |     |           |          |             |
|------|----------|----------|------|-----|-----------|----------|-------------|
| chr4 | 1.31E+08 | 1.32E+08 | 1008 | 857 | 131500000 | 0.161757 | 0.011080253 |
| chr4 | 1.32E+08 | 1.32E+08 | 1003 | 813 | 131550000 | 0.230623 | 0.00057525  |
| chr4 | 1.32E+08 | 1.32E+08 | 955  | 814 | 131800000 | 0.1581   | 0.012668566 |
| chr4 | 1.32E+08 | 1.32E+08 | 972  | 804 | 131850000 | 0.201389 | 0.002234131 |
| chr4 | 1.32E+08 | 1.32E+08 | 999  | 855 | 1.32E+08  | 0.152188 | 0.015655048 |
| chr4 | 1.32E+08 | 1.32E+08 | 989  | 839 | 132050000 | 0.164928 | 0.009846421 |
| chr4 | 1.32E+08 | 1.32E+08 | 966  | 798 | 132100000 | 0.203263 | 0.002057238 |
| chr4 | 1.32E+08 | 1.32E+08 | 1005 | 845 | 132150000 | 0.1778   | 0.005988995 |
| chr4 | 1.32E+08 | 1.32E+08 | 1041 | 904 | 132200000 | 0.131204 | 0.03160877  |
| chr4 | 1.32E+08 | 1.32E+08 | 863  | 752 | 132350000 | 0.126256 | 0.036895089 |
| chr4 | 1.32E+08 | 1.32E+08 | 939  | 798 | 132400000 | 0.162365 | 0.010833787 |
| chr4 | 1.33E+08 | 1.33E+08 | 140  | 146 | 132650000 | -0.13291 | 0.029641217 |
| chr4 | 1.33E+08 | 1.33E+08 | 143  | 119 | 132800000 | 0.192682 | 0.003251611 |
| chr4 | 1.33E+08 | 1.33E+08 | 166  | 126 | 132850000 | 0.325388 | 2.57E-06    |
| chr4 | 1.33E+08 | 1.33E+08 | 618  | 471 | 132900000 | 0.319508 | 3.75E-06    |
| chr4 | 1.33E+08 | 1.33E+08 | 1034 | 833 | 132950000 | 0.239476 | 0.000370379 |
| chr4 | 1.33E+08 | 1.33E+08 | 957  | 826 | 1.33E+08  | 0.140005 | 0.023758823 |
| chr4 | 1.33E+08 | 1.33E+08 | 957  | 806 | 133100000 | 0.175367 | 0.006593692 |
| chr4 | 1.33E+08 | 1.33E+08 | 988  | 783 | 133150000 | 0.263127 | 0.000106884 |
| chr4 | 1.33E+08 | 1.33E+08 | 981  | 852 | 133200000 | 0.131028 | 0.031785101 |
| chr4 | 1.33E+08 | 1.33E+08 | 971  | 851 | 133250000 | 0.11794  | 0.047399241 |
| chr4 | 1.33E+08 | 1.33E+08 | 990  | 836 | 133300000 | 0.171554 | 0.007650693 |
| chr4 | 1.33E+08 | 1.33E+08 | 940  | 764 | 133350000 | 0.226716 | 0.000695566 |
| chr4 | 1.33E+08 | 1.33E+08 | 936  | 816 | 133400000 | 0.125568 | 0.037685231 |
| chr4 | 1.34E+08 | 1.34E+08 | 971  | 852 | 133900000 | 0.116246 | 0.049809757 |
| chr4 | 1.34E+08 | 1.34E+08 | 984  | 846 | 134200000 | 0.145629 | 0.019659947 |
| chr4 | 1.34E+08 | 1.34E+08 | 1044 | 884 | 134250000 | 0.167632 | 0.0088913   |
| chr4 | 1.34E+08 | 1.34E+08 | 1024 | 886 | 134300000 | 0.136465 | 0.026692214 |
| chr4 | 1.34E+08 | 1.34E+08 | 1083 | 933 | 134350000 | 0.142712 | 0.021703482 |
| chr4 | 1.34E+08 | 1.34E+08 | 1047 | 862 | 134400000 | 0.20813  | 0.001655689 |
| chr4 | 1.35E+08 | 1.35E+08 | 995  | 849 | 134550000 | 0.15656  | 0.013394527 |
| chr4 | 1.35E+08 | 1.35E+08 | 1005 | 864 | 134600000 | 0.145721 | 0.019598492 |
| chr4 | 1.35E+08 | 1.35E+08 | 934  | 791 | 134650000 | 0.167373 | 0.008978984 |
| chr4 | 1.35E+08 | 1.35E+08 | 931  | 813 | 134700000 | 0.123154 | 0.040565175 |
| chr4 | 1.35E+08 | 1.35E+08 | 1011 | 881 | 134750000 | 0.126197 | 0.03696206  |
| chr4 | 1.35E+08 | 1.35E+08 | 1023 | 867 | 134800000 | 0.16633  | 0.009340287 |
| chr4 | 1.35E+08 | 1.35E+08 | 1046 | 880 | 134850000 | 0.176936 | 0.006198027 |
| chr4 | 1.35E+08 | 1.35E+08 | 1013 | 864 | 1.35E+08  | 0.157159 | 0.013107982 |
| chr4 | 1.35E+08 | 1.35E+08 | 1035 | 882 | 135050000 | 0.158408 | 0.012527421 |
| chr4 | 1.35E+08 | 1.35E+08 | 1022 | 882 | 135250000 | 0.140173 | 0.023627054 |
| chr4 | 1.35E+08 | 1.36E+08 | 994  | 854 | 135450000 | 0.146638 | 0.018992119 |
| chr4 | 1.35E+08 | 1.36E+08 | 1014 | 834 | 135500000 | 0.209567 | 0.001551667 |
| chr4 | 1.36E+08 | 1.36E+08 | 975  | 838 | 135550000 | 0.14608  | 0.019358834 |
| chr4 | 1.36E+08 | 1.36E+08 | 990  | 863 | 135650000 | 0.125696 | 0.03753662  |
| chr4 | 1.36E+08 | 1.36E+08 | 991  | 824 | 135700000 | 0.193869 | 0.003091826 |
| chr4 | 1.36E+08 | 1.36E+08 | 952  | 787 | 135750000 | 0.202226 | 0.002153454 |
| chr4 | 1.36E+08 | 1.36E+08 | 953  | 826 | 135900000 | 0.133963 | 0.028944396 |

|      |          |          |      |      |           |          |             |
|------|----------|----------|------|------|-----------|----------|-------------|
| chr4 | 1.36E+08 | 1.36E+08 | 954  | 824  | 136400000 | 0.138973 | 0.024584644 |
| chr4 | 1.37E+08 | 1.37E+08 | 999  | 873  | 136550000 | 0.122131 | 0.041838535 |
| chr4 | 1.37E+08 | 1.37E+08 | 1003 | 866  | 136600000 | 0.139511 | 0.024151453 |
| chr4 | 1.37E+08 | 1.37E+08 | 968  | 828  | 136650000 | 0.153005 | 0.015209735 |
| chr4 | 1.37E+08 | 1.37E+08 | 1033 | 866  | 136700000 | 0.18203  | 0.005054508 |
| chr4 | 1.37E+08 | 1.37E+08 | 1036 | 850  | 136750000 | 0.213117 | 0.001319708 |
| chr4 | 1.37E+08 | 1.37E+08 | 1026 | 899  | 136800000 | 0.118266 | 0.046947003 |
| chr4 | 1.37E+08 | 1.37E+08 | 1072 | 932  | 136850000 | 0.129531 | 0.033320576 |
| chr4 | 1.37E+08 | 1.37E+08 | 1047 | 838  | 136900000 | 0.248868 | 0.000228748 |
| chr4 | 1.37E+08 | 1.37E+08 | 1004 | 875  | 136950000 | 0.126033 | 0.03715013  |
| chr4 | 1.37E+08 | 1.37E+08 | 1031 | 887  | 137050000 | 0.144667 | 0.02031534  |
| chr4 | 1.37E+08 | 1.37E+08 | 1050 | 895  | 137100000 | 0.158058 | 0.012687994 |
| chr4 | 1.37E+08 | 1.37E+08 | 1040 | 907  | 137150000 | 0.125037 | 0.038303213 |
| chr4 | 1.38E+08 | 1.38E+08 | 1017 | 880  | 137600000 | 0.136372 | 0.026773076 |
| chr4 | 1.38E+08 | 1.38E+08 | 1097 | 962  | 1.38E+08  | 0.117083 | 0.048607143 |
| chr4 | 1.38E+08 | 1.38E+08 | 1047 | 852  | 138150000 | 0.224964 | 0.000756759 |
| chr4 | 1.38E+08 | 1.38E+08 | 1042 | 862  | 138200000 | 0.201224 | 0.002250384 |
| chr4 | 1.38E+08 | 1.38E+08 | 1018 | 810  | 138350000 | 0.257372 | 0.000145919 |
| chr4 | 1.38E+08 | 1.38E+08 | 877  | 743  | 138400000 | 0.166843 | 0.009161162 |
| chr4 | 1.39E+08 | 1.39E+08 | 982  | 829  | 138700000 | 0.171979 | 0.00752581  |
| chr4 | 1.39E+08 | 1.39E+08 | 932  | 811  | 138750000 | 0.128256 | 0.034676545 |
| chr4 | 1.39E+08 | 1.39E+08 | 982  | 851  | 138850000 | 0.134192 | 0.028731508 |
| chr4 | 1.39E+08 | 1.39E+08 | 1068 | 895  | 138900000 | 0.18258  | 0.004942933 |
| chr4 | 1.39E+08 | 1.39E+08 | 981  | 849  | 139250000 | 0.136117 | 0.02699677  |
| chr4 | 1.39E+08 | 1.39E+08 | 876  | 906  | 139400000 | -0.12095 | 0.043017082 |
| chr4 | 1.4E+08  | 1.4E+08  | 765  | 790  | 139900000 | -0.11876 | 0.045925744 |
| chr4 | 1.4E+08  | 1.4E+08  | 819  | 708  | 140200000 | 0.137742 | 0.025600844 |
| chr4 | 1.41E+08 | 1.41E+08 | 934  | 963  | 140650000 | -0.11649 | 0.049123718 |
| chr4 | 1.42E+08 | 1.42E+08 | 968  | 1023 | 141550000 | -0.1521  | 0.015482366 |
| chr4 | 1.42E+08 | 1.42E+08 | 998  | 870  | 141800000 | 0.125653 | 0.037586899 |
| chr4 | 1.42E+08 | 1.42E+08 | 1070 | 864  | 141950000 | 0.236136 | 0.000438007 |
| chr4 | 1.42E+08 | 1.42E+08 | 1020 | 854  | 1.42E+08  | 0.183889 | 0.004686506 |
| chr4 | 1.42E+08 | 1.43E+08 | 990  | 855  | 142450000 | 0.139132 | 0.02445574  |
| chr4 | 1.43E+08 | 1.43E+08 | 959  | 818  | 143150000 | 0.157058 | 0.013155915 |
| chr4 | 1.43E+08 | 1.44E+08 | 1043 | 892  | 143450000 | 0.153252 | 0.015076975 |
| chr4 | 1.45E+08 | 1.45E+08 | 306  | 259  | 144750000 | 0.168208 | 0.008698643 |
| chr4 | 1.45E+08 | 1.45E+08 | 206  | 172  | 144800000 | 0.187864 | 0.003979348 |
| chr4 | 1.45E+08 | 1.46E+08 | 979  | 852  | 145450000 | 0.128084 | 0.034863565 |
| chr4 | 1.45E+08 | 1.46E+08 | 1021 | 887  | 145500000 | 0.130605 | 0.032212851 |
| chr4 | 1.46E+08 | 1.46E+08 | 939  | 803  | 145650000 | 0.153353 | 0.0150227   |
| chr4 | 1.46E+08 | 1.46E+08 | 847  | 718  | 145700000 | 0.166006 | 0.009455179 |
| chr4 | 1.46E+08 | 1.46E+08 | 891  | 746  | 145750000 | 0.183878 | 0.004688682 |
| chr4 | 1.46E+08 | 1.46E+08 | 869  | 750  | 146150000 | 0.140094 | 0.02368917  |
| chr4 | 1.46E+08 | 1.46E+08 | 943  | 810  | 146350000 | 0.146964 | 0.018780504 |
| chr4 | 1.46E+08 | 1.46E+08 | 1013 | 821  | 146400000 | 0.230808 | 0.000570042 |
| chr4 | 1.46E+08 | 1.47E+08 | 1035 | 894  | 146450000 | 0.138912 | 0.024634111 |
| chr4 | 1.47E+08 | 1.47E+08 | 1014 | 886  | 146700000 | 0.122307 | 0.041617102 |



|      |          |          |      |     |           |          |             |
|------|----------|----------|------|-----|-----------|----------|-------------|
| chr4 | 1.47E+08 | 1.48E+08 | 840  | 889 | 147450000 | -0.15417 | 0.014380549 |
| chr4 | 1.48E+08 | 1.48E+08 | 976  | 826 | 147650000 | 0.168368 | 0.008645857 |
| chr4 | 1.48E+08 | 1.48E+08 | 879  | 768 | 147700000 | 0.122385 | 0.041519528 |
| chr4 | 1.48E+08 | 1.48E+08 | 1099 | 934 | 147850000 | 0.162325 | 0.010849648 |
| chr4 | 1.48E+08 | 1.48E+08 | 1134 | 964 | 147900000 | 0.161944 | 0.011003894 |
| chr4 | 1.48E+08 | 1.48E+08 | 1106 | 957 | 147950000 | 0.136389 | 0.026758863 |
| chr4 | 1.48E+08 | 1.48E+08 | 1041 | 885 | 148100000 | 0.161849 | 0.011042567 |
| chr4 | 1.48E+08 | 1.48E+08 | 957  | 833 | 148150000 | 0.127831 | 0.035139186 |
| chr4 | 1.48E+08 | 1.48E+08 | 1021 | 861 | 148200000 | 0.173526 | 0.007086714 |
| chr4 | 1.48E+08 | 1.48E+08 | 1054 | 914 | 148250000 | 0.133237 | 0.029626301 |
| chr4 | 1.49E+08 | 1.49E+08 | 883  | 758 | 148600000 | 0.147844 | 0.018219613 |
| chr4 | 1.5E+08  | 1.5E+08  | 957  | 833 | 149550000 | 0.127831 | 0.035139186 |
| chr4 | 1.5E+08  | 1.5E+08  | 1044 | 908 | 149650000 | 0.128986 | 0.033895293 |
| chr4 | 1.5E+08  | 1.5E+08  | 989  | 866 | 150100000 | 0.119232 | 0.045625774 |
| chr4 | 1.5E+08  | 1.5E+08  | 980  | 828 | 150150000 | 0.170779 | 0.007882833 |
| chr4 | 1.5E+08  | 1.5E+08  | 1016 | 879 | 150200000 | 0.136594 | 0.026580898 |
| chr4 | 1.5E+08  | 1.5E+08  | 978  | 845 | 150400000 | 0.138511 | 0.024961864 |
| chr4 | 1.5E+08  | 1.51E+08 | 1039 | 855 | 150450000 | 0.208828 | 0.001604405 |
| chr4 | 1.5E+08  | 1.51E+08 | 982  | 854 | 150500000 | 0.129115 | 0.033758189 |
| chr4 | 1.51E+08 | 1.51E+08 | 896  | 754 | 150800000 | 0.176562 | 0.006290219 |
| chr4 | 1.51E+08 | 1.51E+08 | 1010 | 874 | 151100000 | 0.136278 | 0.026855263 |
| chr4 | 1.51E+08 | 1.51E+08 | 970  | 851 | 151400000 | 0.116454 | 0.049509008 |
| chr4 | 1.51E+08 | 1.52E+08 | 932  | 804 | 151450000 | 0.140763 | 0.023167933 |
| chr4 | 1.51E+08 | 1.52E+08 | 1023 | 859 | 151500000 | 0.179704 | 0.005550784 |
| chr4 | 1.52E+08 | 1.52E+08 | 1067 | 856 | 151550000 | 0.245506 | 0.000272294 |
| chr4 | 1.52E+08 | 1.52E+08 | 1052 | 852 | 151600000 | 0.231838 | 0.000541958 |
| chr4 | 1.52E+08 | 1.52E+08 | 1057 | 925 | 151650000 | 0.120078 | 0.044492411 |
| chr4 | 1.52E+08 | 1.52E+08 | 730  | 757 | 1.52E+08  | -0.12477 | 0.038300104 |
| chr4 | 1.52E+08 | 1.52E+08 | 915  | 773 | 152100000 | 0.170932 | 0.007836691 |
| chr4 | 1.52E+08 | 1.52E+08 | 876  | 925 | 152300000 | -0.15089 | 0.016157487 |
| chr4 | 1.53E+08 | 1.53E+08 | 975  | 854 | 152700000 | 0.118794 | 0.046220315 |
| chr4 | 1.53E+08 | 1.53E+08 | 1151 | 920 | 153250000 | 0.25081  | 0.000206649 |
| chr4 | 1.53E+08 | 1.53E+08 | 1110 | 934 | 153300000 | 0.176693 | 0.006257718 |
| chr4 | 1.54E+08 | 1.54E+08 | 916  | 765 | 154350000 | 0.187516 | 0.00403718  |
| chr4 | 1.55E+08 | 1.55E+08 | 1105 | 949 | 154850000 | 0.147195 | 0.018632127 |
| chr4 | 1.55E+08 | 1.55E+08 | 949  | 829 | 155100000 | 0.122664 | 0.04117101  |
| chr4 | 1.56E+08 | 1.56E+08 | 870  | 914 | 155700000 | -0.14355 | 0.020843617 |
| chr4 | 1.56E+08 | 1.56E+08 | 972  | 798 | 155850000 | 0.212196 | 0.001376647 |
| chr4 | 1.56E+08 | 1.56E+08 | 1019 | 850 | 155900000 | 0.189248 | 0.003756673 |
| chr4 | 1.56E+08 | 1.56E+08 | 976  | 849 | 155950000 | 0.128745 | 0.034151688 |
| chr4 | 1.56E+08 | 1.57E+08 | 998  | 873 | 156500000 | 0.120686 | 0.043692535 |
| chr4 | 1.57E+08 | 1.57E+08 | 943  | 814 | 156800000 | 0.139857 | 0.023875905 |
| chr4 | 1.57E+08 | 1.57E+08 | 1045 | 905 | 157050000 | 0.135141 | 0.02786456  |
| chr4 | 1.57E+08 | 1.57E+08 | 921  | 793 | 157250000 | 0.143509 | 0.021128573 |
| chr4 | 1.57E+08 | 1.57E+08 | 979  | 847 | 157300000 | 0.136575 | 0.026596884 |
| chr4 | 1.57E+08 | 1.57E+08 | 994  | 860 | 157400000 | 0.136537 | 0.026629588 |
| chr4 | 1.57E+08 | 1.58E+08 | 1020 | 881 | 157450000 | 0.138983 | 0.024576286 |

|      |          |          |      |     |           |          |             |
|------|----------|----------|------|-----|-----------|----------|-------------|
| chr4 | 1.58E+08 | 1.58E+08 | 1071 | 909 | 157600000 | 0.164235 | 0.010105424 |
| chr4 | 1.58E+08 | 1.58E+08 | 1057 | 901 | 157650000 | 0.158005 | 0.012712605 |
| chr4 | 1.58E+08 | 1.58E+08 | 1041 | 856 | 1.58E+08  | 0.209916 | 0.001527318 |
| chr4 | 1.58E+08 | 1.58E+08 | 961  | 842 | 158050000 | 0.118344 | 0.046838492 |
| chr4 | 1.58E+08 | 1.58E+08 | 1066 | 924 | 158250000 | 0.133871 | 0.029029888 |
| chr4 | 1.58E+08 | 1.58E+08 | 1000 | 873 | 158400000 | 0.123575 | 0.040050748 |
| chr4 | 1.61E+08 | 1.61E+08 | 976  | 837 | 160600000 | 0.149282 | 0.017333669 |
| chr4 | 1.61E+08 | 1.61E+08 | 981  | 851 | 161150000 | 0.132722 | 0.03011814  |
| chr4 | 1.61E+08 | 1.61E+08 | 972  | 811 | 161200000 | 0.188883 | 0.003814288 |
| chr4 | 1.61E+08 | 1.61E+08 | 971  | 805 | 161250000 | 0.198111 | 0.002577209 |
| chr4 | 1.61E+08 | 1.61E+08 | 980  | 841 | 161300000 | 0.148304 | 0.017931852 |
| chr4 | 1.61E+08 | 1.62E+08 | 923  | 807 | 161450000 | 0.12139  | 0.042781278 |
| chr4 | 1.61E+08 | 1.62E+08 | 891  | 771 | 161500000 | 0.136323 | 0.02681642  |
| chr4 | 1.62E+08 | 1.62E+08 | 968  | 827 | 161650000 | 0.154748 | 0.014294781 |
| chr4 | 1.62E+08 | 1.62E+08 | 959  | 825 | 161700000 | 0.144765 | 0.020247502 |
| chr4 | 1.62E+08 | 1.62E+08 | 1045 | 912 | 161750000 | 0.124025 | 0.03950537  |
| chr4 | 1.62E+08 | 1.62E+08 | 996  | 833 | 161950000 | 0.185457 | 0.004395076 |
| chr4 | 1.62E+08 | 1.62E+08 | 913  | 771 | 1.62E+08  | 0.171512 | 0.007663    |
| chr4 | 1.62E+08 | 1.62E+08 | 950  | 827 | 162050000 | 0.127668 | 0.035316879 |
| chr4 | 1.62E+08 | 1.62E+08 | 1010 | 869 | 162200000 | 0.144555 | 0.020392197 |
| chr4 | 1.62E+08 | 1.62E+08 | 1051 | 920 | 162250000 | 0.119685 | 0.045015931 |
| chr4 | 1.62E+08 | 1.62E+08 | 1012 | 830 | 162400000 | 0.213654 | 0.00128755  |
| chr4 | 1.62E+08 | 1.63E+08 | 1045 | 844 | 162450000 | 0.235816 | 0.000445046 |
| chr4 | 1.62E+08 | 1.63E+08 | 1019 | 851 | 162500000 | 0.187551 | 0.004031301 |
| chr4 | 1.63E+08 | 1.63E+08 | 975  | 834 | 162550000 | 0.152983 | 0.015221297 |
| chr4 | 1.63E+08 | 1.63E+08 | 945  | 825 | 162800000 | 0.123548 | 0.040082672 |
| chr4 | 1.63E+08 | 1.63E+08 | 987  | 854 | 162850000 | 0.136442 | 0.026712307 |
| chr4 | 1.63E+08 | 1.63E+08 | 1081 | 930 | 1.63E+08  | 0.144692 | 0.020297683 |
| chr4 | 1.63E+08 | 1.63E+08 | 1082 | 922 | 163050000 | 0.15849  | 0.012490273 |
| chr4 | 1.63E+08 | 1.63E+08 | 1032 | 873 | 163100000 | 0.169018 | 0.008434037 |
| chr4 | 1.63E+08 | 1.63E+08 | 1027 | 859 | 163150000 | 0.185334 | 0.004417353 |
| chr4 | 1.63E+08 | 1.63E+08 | 983  | 841 | 163200000 | 0.152714 | 0.015367086 |
| chr4 | 1.63E+08 | 1.63E+08 | 989  | 851 | 163250000 | 0.14444  | 0.020472574 |
| chr4 | 1.63E+08 | 1.63E+08 | 998  | 844 | 163400000 | 0.169425 | 0.008303625 |
| chr4 | 1.63E+08 | 1.64E+08 | 962  | 826 | 163500000 | 0.147523 | 0.01842226  |
| chr4 | 1.64E+08 | 1.64E+08 | 996  | 856 | 163550000 | 0.146163 | 0.019303908 |
| chr4 | 1.65E+08 | 1.65E+08 | 1007 | 849 | 164700000 | 0.173855 | 0.006996163 |
| chr4 | 1.65E+08 | 1.65E+08 | 921  | 756 | 1.65E+08  | 0.212443 | 0.001361149 |
| chr4 | 1.65E+08 | 1.65E+08 | 958  | 779 | 165050000 | 0.226031 | 0.000718952 |
| chr4 | 1.65E+08 | 1.65E+08 | 830  | 709 | 165200000 | 0.154954 | 0.014189885 |
| chr4 | 1.65E+08 | 1.65E+08 | 1049 | 850 | 165250000 | 0.231108 | 0.000561724 |
| chr4 | 1.65E+08 | 1.65E+08 | 1025 | 859 | 165300000 | 0.182522 | 0.004954616 |
| chr4 | 1.66E+08 | 1.66E+08 | 875  | 759 | 165750000 | 0.132811 | 0.030032504 |
| chr4 | 1.66E+08 | 1.66E+08 | 812  | 678 | 165800000 | 0.187823 | 0.003986177 |
| chr4 | 1.66E+08 | 1.66E+08 | 499  | 524 | 166200000 | -0.1429  | 0.021310334 |
| chr4 | 1.67E+08 | 1.67E+08 | 990  | 852 | 166700000 | 0.144203 | 0.020637392 |
| chr4 | 1.67E+08 | 1.67E+08 | 962  | 837 | 166750000 | 0.128438 | 0.034481077 |

|      |          |          |      |     |           |          |             |
|------|----------|----------|------|-----|-----------|----------|-------------|
| chr4 | 1.67E+08 | 1.67E+08 | 963  | 828 | 166800000 | 0.145533 | 0.019724254 |
| chr4 | 1.67E+08 | 1.67E+08 | 983  | 769 | 166850000 | 0.281836 | 3.74E-05    |
| chr4 | 1.67E+08 | 1.67E+08 | 1021 | 814 | 166900000 | 0.25451  | 0.000169986 |
| chr4 | 1.67E+08 | 1.67E+08 | 1011 | 881 | 166950000 | 0.126197 | 0.03696206  |
| chr4 | 1.67E+08 | 1.67E+08 | 962  | 844 | 167200000 | 0.116422 | 0.049554834 |
| chr4 | 1.67E+08 | 1.67E+08 | 974  | 841 | 167250000 | 0.139444 | 0.024204835 |
| chr4 | 1.67E+08 | 1.67E+08 | 993  | 849 | 167300000 | 0.153657 | 0.014861354 |
| chr4 | 1.67E+08 | 1.67E+08 | 961  | 813 | 167350000 | 0.168909 | 0.008469017 |
| chr4 | 1.67E+08 | 1.68E+08 | 988  | 823 | 167500000 | 0.191247 | 0.003454679 |
| chr4 | 1.68E+08 | 1.68E+08 | 1055 | 810 | 167550000 | 0.308877 | 7.35E-06    |
| chr4 | 1.68E+08 | 1.68E+08 | 948  | 793 | 167600000 | 0.185194 | 0.004442802 |
| chr4 | 1.68E+08 | 1.68E+08 | 852  | 709 | 167700000 | 0.192696 | 0.003249653 |
| chr4 | 1.68E+08 | 1.68E+08 | 1000 | 870 | 167750000 | 0.128541 | 0.034369937 |
| chr4 | 1.68E+08 | 1.68E+08 | 910  | 771 | 168200000 | 0.166764 | 0.009188563 |
| chr4 | 1.68E+08 | 1.68E+08 | 967  | 844 | 168350000 | 0.123901 | 0.039655175 |
| chr4 | 1.68E+08 | 1.68E+08 | 948  | 779 | 168400000 | 0.210892 | 0.001461044 |
| chr4 | 1.68E+08 | 1.69E+08 | 968  | 818 | 168450000 | 0.170534 | 0.007957471 |
| chr4 | 1.68E+08 | 1.69E+08 | 1026 | 885 | 168500000 | 0.14091  | 0.023054751 |
| chr4 | 1.69E+08 | 1.69E+08 | 1036 | 887 | 168700000 | 0.151646 | 0.015957139 |
| chr4 | 1.69E+08 | 1.69E+08 | 1046 | 873 | 168750000 | 0.188458 | 0.003882409 |
| chr4 | 1.7E+08  | 1.7E+08  | 1084 | 939 | 169600000 | 0.134796 | 0.028177551 |
| chr4 | 1.7E+08  | 1.7E+08  | 895  | 943 | 1.70E+08  | -0.14774 | 0.018044899 |
| chr4 | 1.7E+08  | 1.7E+08  | 1067 | 911 | 170100000 | 0.155665 | 0.013832672 |
| chr4 | 1.71E+08 | 1.71E+08 | 763  | 804 | 170700000 | -0.14788 | 0.017955774 |
| chr4 | 1.71E+08 | 1.71E+08 | 848  | 736 | 171150000 | 0.131987 | 0.030832624 |
| chr4 | 1.71E+08 | 1.71E+08 | 922  | 783 | 171350000 | 0.163383 | 0.010431744 |
| chr4 | 1.71E+08 | 1.71E+08 | 946  | 758 | 171400000 | 0.247271 | 0.00024855  |
| chr4 | 1.72E+08 | 1.72E+08 | 912  | 776 | 171600000 | 0.160605 | 0.011560509 |
| chr4 | 1.72E+08 | 1.72E+08 | 1008 | 823 | 171650000 | 0.22016  | 0.000951029 |
| chr4 | 1.72E+08 | 1.72E+08 | 966  | 813 | 171700000 | 0.176396 | 0.006331708 |
| chr4 | 1.72E+08 | 1.72E+08 | 935  | 803 | 171750000 | 0.147195 | 0.018632127 |
| chr4 | 1.72E+08 | 1.72E+08 | 1017 | 864 | 171900000 | 0.162845 | 0.010642549 |
| chr4 | 1.72E+08 | 1.72E+08 | 956  | 815 | 172150000 | 0.157839 | 0.012789322 |
| chr4 | 1.72E+08 | 1.72E+08 | 984  | 843 | 172400000 | 0.150754 | 0.016465154 |
| chr4 | 1.73E+08 | 1.73E+08 | 1033 | 902 | 172550000 | 0.123269 | 0.040423874 |
| chr4 | 1.73E+08 | 1.73E+08 | 989  | 865 | 172650000 | 0.120899 | 0.043416115 |
| chr4 | 1.73E+08 | 1.73E+08 | 968  | 830 | 172850000 | 0.149524 | 0.017188146 |
| chr4 | 1.73E+08 | 1.73E+08 | 1010 | 855 | 172900000 | 0.167987 | 0.00877197  |
| chr4 | 1.74E+08 | 1.74E+08 | 1121 | 961 | 173600000 | 0.149806 | 0.017019884 |
| chr4 | 1.74E+08 | 1.74E+08 | 1121 | 915 | 173650000 | 0.220571 | 0.000932753 |
| chr4 | 1.74E+08 | 1.74E+08 | 1036 | 880 | 174100000 | 0.163077 | 0.010551144 |
| chr4 | 1.74E+08 | 1.74E+08 | 1056 | 917 | 174150000 | 0.131244 | 0.031567931 |
| chr4 | 1.75E+08 | 1.75E+08 | 965  | 835 | 174700000 | 0.136381 | 0.026765671 |
| chr4 | 1.75E+08 | 1.75E+08 | 1057 | 917 | 174950000 | 0.13261  | 0.030226299 |
| chr4 | 1.75E+08 | 1.75E+08 | 1035 | 895 | 175150000 | 0.137299 | 0.025975052 |
| chr4 | 1.75E+08 | 1.76E+08 | 1041 | 889 | 175500000 | 0.155343 | 0.013993594 |
| chr4 | 1.76E+08 | 1.76E+08 | 1053 | 880 | 175550000 | 0.186558 | 0.004200314 |

|      |          |          |      |      |           |          |             |
|------|----------|----------|------|------|-----------|----------|-------------|
| chr4 | 1.76E+08 | 1.76E+08 | 988  | 837  | 175650000 | 0.166912 | 0.009137346 |
| chr4 | 1.76E+08 | 1.76E+08 | 994  | 836  | 175700000 | 0.177371 | 0.006091971 |
| chr4 | 1.76E+08 | 1.76E+08 | 984  | 1025 | 175850000 | -0.13127 | 0.031247765 |
| chr4 | 1.76E+08 | 1.76E+08 | 919  | 755  | 175950000 | 0.211216 | 0.001439608 |
| chr4 | 1.76E+08 | 1.76E+08 | 1017 | 861  | 1.76E+08  | 0.167863 | 0.008813573 |
| chr4 | 1.76E+08 | 1.76E+08 | 1031 | 874  | 176050000 | 0.165967 | 0.009469078 |
| chr4 | 1.76E+08 | 1.76E+08 | 980  | 808  | 176100000 | 0.206055 | 0.001817218 |
| chr4 | 1.76E+08 | 1.76E+08 | 978  | 805  | 176150000 | 0.208474 | 0.001630217 |
| chr4 | 1.76E+08 | 1.76E+08 | 897  | 785  | 176350000 | 0.120044 | 0.044538511 |
| chr4 | 1.76E+08 | 1.76E+08 | 942  | 818  | 176400000 | 0.131254 | 0.031557909 |
| chr4 | 1.77E+08 | 1.77E+08 | 942  | 762  | 176550000 | 0.233564 | 0.000497714 |
| chr4 | 1.77E+08 | 1.77E+08 | 1011 | 840  | 176600000 | 0.19495  | 0.00295253  |
| chr4 | 1.77E+08 | 1.77E+08 | 1028 | 881  | 176650000 | 0.150255 | 0.016755461 |
| chr4 | 1.77E+08 | 1.77E+08 | 1016 | 874  | 176700000 | 0.144823 | 0.020207236 |
| chr4 | 1.77E+08 | 1.77E+08 | 1013 | 883  | 176850000 | 0.125777 | 0.037443409 |
| chr4 | 1.77E+08 | 1.77E+08 | 1022 | 871  | 176900000 | 0.158279 | 0.012586609 |
| chr4 | 1.77E+08 | 1.77E+08 | 1060 | 873  | 176950000 | 0.207639 | 0.001692673 |
| chr4 | 1.77E+08 | 1.77E+08 | 969  | 834  | 177100000 | 0.144078 | 0.020725606 |
| chr4 | 1.78E+08 | 1.78E+08 | 1017 | 843  | 177650000 | 0.198343 | 0.002551374 |
| chr4 | 1.78E+08 | 1.78E+08 | 1085 | 879  | 177700000 | 0.231388 | 0.000554058 |
| chr4 | 1.78E+08 | 1.78E+08 | 1052 | 888  | 177750000 | 0.172131 | 0.007481562 |
| chr4 | 1.79E+08 | 1.79E+08 | 1013 | 874  | 178850000 | 0.140557 | 0.023327005 |
| chr4 | 1.79E+08 | 1.79E+08 | 925  | 784  | 178900000 | 0.166228 | 0.0093765   |
| chr4 | 1.79E+08 | 1.79E+08 | 940  | 807  | 178950000 | 0.14772  | 0.018297482 |
| chr4 | 1.79E+08 | 1.79E+08 | 1066 | 880  | 1.79E+08  | 0.20426  | 0.001968351 |
| chr4 | 1.79E+08 | 1.79E+08 | 1031 | 896  | 179050000 | 0.130102 | 0.032728046 |
| chr4 | 1.79E+08 | 1.79E+08 | 1011 | 861  | 179100000 | 0.159326 | 0.012115322 |
| chr4 | 1.79E+08 | 1.79E+08 | 984  | 822  | 179150000 | 0.187148 | 0.004099158 |
| chr4 | 1.79E+08 | 1.79E+08 | 1056 | 905  | 179250000 | 0.150248 | 0.016759095 |
| chr4 | 1.79E+08 | 1.8E+08  | 1029 | 862  | 179500000 | 0.183111 | 0.004837418 |
| chr4 | 1.8E+08  | 1.8E+08  | 998  | 828  | 179550000 | 0.197037 | 0.002699527 |
| chr4 | 1.8E+08  | 1.8E+08  | 980  | 833  | 179600000 | 0.162093 | 0.01094313  |
| chr4 | 1.8E+08  | 1.8E+08  | 1042 | 886  | 179650000 | 0.161605 | 0.011142582 |
| chr4 | 1.8E+08  | 1.8E+08  | 928  | 777  | 179950000 | 0.183838 | 0.004696263 |
| chr4 | 1.8E+08  | 1.8E+08  | 1005 | 763  | 1.80E+08  | 0.325069 | 2.62E-06    |
| chr4 | 1.8E+08  | 1.8E+08  | 1047 | 814  | 180050000 | 0.290789 | 2.21E-05    |
| chr4 | 1.81E+08 | 1.81E+08 | 930  | 780  | 180650000 | 0.181385 | 0.00518798  |
| chr4 | 1.81E+08 | 1.81E+08 | 1079 | 923  | 180700000 | 0.152921 | 0.015255048 |
| chr4 | 1.81E+08 | 1.81E+08 | 1045 | 904  | 180950000 | 0.136736 | 0.026457267 |
| chr4 | 1.81E+08 | 1.81E+08 | 1032 | 899  | 1.81E+08  | 0.126678 | 0.036417501 |
| chr4 | 1.81E+08 | 1.81E+08 | 1040 | 867  | 181050000 | 0.190108 | 0.003623924 |
| chr4 | 1.81E+08 | 1.81E+08 | 1019 | 859  | 181100000 | 0.174052 | 0.006942572 |
| chr4 | 1.81E+08 | 1.81E+08 | 982  | 816  | 181150000 | 0.194782 | 0.002973785 |
| chr4 | 1.81E+08 | 1.81E+08 | 1013 | 880  | 181200000 | 0.130687 | 0.032129643 |
| chr4 | 1.84E+08 | 1.84E+08 | 1013 | 861  | 183600000 | 0.162177 | 0.010909245 |
| chr4 | 1.84E+08 | 1.84E+08 | 847  | 899  | 183750000 | -0.15833 | 0.012364382 |
| chr4 | 1.84E+08 | 1.84E+08 | 954  | 1038 | 183800000 | -0.19412 | 0.002974657 |

|      |          |          |      |      |           |          |             |
|------|----------|----------|------|------|-----------|----------|-------------|
| chr4 | 1.84E+08 | 1.84E+08 | 933  | 1022 | 183850000 | -0.20382 | 0.001943727 |
| chr4 | 1.84E+08 | 1.84E+08 | 819  | 847  | 183900000 | -0.12087 | 0.043122931 |
| chr4 | 1.84E+08 | 1.84E+08 | 867  | 902  | 184400000 | -0.12947 | 0.033082633 |
| chr4 | 1.84E+08 | 1.85E+08 | 895  | 966  | 184450000 | -0.18251 | 0.004841859 |
| chr4 | 1.85E+08 | 1.85E+08 | 985  | 860  | 184550000 | 0.123415 | 0.040245036 |
| chr4 | 1.85E+08 | 1.85E+08 | 940  | 987  | 185050000 | -0.14276 | 0.02141004  |
| chr4 | 1.85E+08 | 1.85E+08 | 1049 | 1088 | 185350000 | -0.12504 | 0.037986546 |
| chr4 | 1.85E+08 | 1.86E+08 | 821  | 712  | 185500000 | 0.133133 | 0.029724946 |
| chr4 | 1.86E+08 | 1.86E+08 | 994  | 845  | 186350000 | 0.161923 | 0.011012475 |
| chr4 | 1.86E+08 | 1.86E+08 | 999  | 837  | 186400000 | 0.182885 | 0.004882095 |
| chr4 | 1.87E+08 | 1.87E+08 | 916  | 988  | 187100000 | -0.18154 | 0.005037946 |
| chr4 | 1.87E+08 | 1.87E+08 | 855  | 897  | 187150000 | -0.14156 | 0.022300328 |
| chr4 | 1.87E+08 | 1.87E+08 | 855  | 882  | 187400000 | -0.11723 | 0.04806524  |
| chr4 | 1.88E+08 | 1.88E+08 | 993  | 1028 | 187650000 | -0.12235 | 0.04124187  |
| chr4 | 1.88E+08 | 1.88E+08 | 968  | 1000 | 187700000 | -0.11929 | 0.0452093   |
| chr4 | 1.88E+08 | 1.88E+08 | 896  | 778  | 187900000 | 0.131357 | 0.031455683 |
| chr4 | 1.88E+08 | 1.88E+08 | 1064 | 932  | 188200000 | 0.118725 | 0.046315858 |
| chr4 | 1.89E+08 | 1.89E+08 | 867  | 747  | 189400000 | 0.142552 | 0.021820995 |
| chr4 | 1.9E+08  | 1.9E+08  | 911  | 1000 | 189600000 | -0.20685 | 0.001695905 |
| chr4 | 1.9E+08  | 1.9E+08  | 965  | 845  | 189800000 | 0.119206 | 0.045660803 |
| chr4 | 1.9E+08  | 1.9E+08  | 980  | 851  | 189950000 | 0.131251 | 0.031561508 |
| chr4 | 1.9E+08  | 1.9E+08  | 978  | 844  | 1.90E+08  | 0.14022  | 0.023590321 |
| chr4 | 1.91E+08 | 1.91E+08 | 1509 | 1567 | 190700000 | -0.12678 | 0.035984983 |
| chr4 | 1.91E+08 | 1.91E+08 | 348  | 389  | 190950000 | -0.23305 | 0.000486981 |
| chrM | 1        | 100000   | 8503 | 9746 | 50000     | -0.26921 | 7.12E-05    |
| chr2 | 300001   | 400000   | 928  | 972  | 350000    | -0.1392  | 0.024127259 |
| chr2 | 350001   | 450000   | 960  | 1007 | 4.00E+05  | -0.14133 | 0.022470781 |
| chr2 | 450001   | 550000   | 1072 | 1112 | 5.00E+05  | -0.12522 | 0.037767055 |
| chr2 | 700001   | 800000   | 965  | 1015 | 750000    | -0.14525 | 0.019666846 |
| chr2 | 750001   | 850000   | 914  | 992  | 8.00E+05  | -0.19052 | 0.003468544 |
| chr2 | 900001   | 1000000  | 927  | 1012 | 950000    | -0.19894 | 0.002412549 |
| chr2 | 950001   | 1050000  | 942  | 995  | 1.00E+06  | -0.15134 | 0.015904108 |
| chr2 | 1400001  | 1500000  | 934  | 980  | 1450000   | -0.14173 | 0.022168731 |
| chr2 | 1450001  | 1550000  | 929  | 1066 | 1500000   | -0.27083 | 6.50E-05    |
| chr2 | 1500001  | 1600000  | 959  | 1125 | 1550000   | -0.30269 | 9.77E-06    |
| chr2 | 1550001  | 1650000  | 1038 | 1152 | 1600000   | -0.22271 | 0.000808851 |
| chr2 | 1600001  | 1700000  | 1077 | 1157 | 1650000   | -0.17574 | 0.006360407 |
| chr2 | 1650001  | 1750000  | 960  | 1056 | 1700000   | -0.20988 | 0.001477547 |
| chr2 | 1700001  | 1800000  | 871  | 950  | 1750000   | -0.19763 | 0.002555193 |
| chr2 | 1750001  | 1850000  | 968  | 1021 | 1800000   | -0.14928 | 0.017104249 |
| chr2 | 1900001  | 2000000  | 1073 | 1108 | 1950000   | -0.11868 | 0.046042037 |
| chr2 | 1950001  | 2050000  | 1006 | 1083 | 2.00E+06  | -0.17877 | 0.005634011 |
| chr2 | 2000001  | 2100000  | 965  | 1004 | 2050000   | -0.12953 | 0.033016897 |
| chr2 | 2100001  | 2200000  | 985  | 1084 | 2150000   | -0.21054 | 0.001433115 |
| chr2 | 2150001  | 2250000  | 955  | 1010 | 2200000   | -0.15315 | 0.014910967 |
| chr2 | 2700001  | 2800000  | 1045 | 1188 | 2750000   | -0.2574  | 0.000136874 |
| chr2 | 2750001  | 2850000  | 1015 | 1156 | 2800000   | -0.26003 | 0.000118591 |

|      |          |          |      |      |          |          |             |
|------|----------|----------|------|------|----------|----------|-------------|
| chr2 | 2800001  | 2900000  | 1067 | 1209 | 2850000  | -0.25263 | 0.000177048 |
| chr2 | 2850001  | 2950000  | 1067 | 1149 | 2900000  | -0.17919 | 0.005540417 |
| chr2 | 2950001  | 3050000  | 1059 | 1104 | 3.00E+06 | -0.13241 | 0.030125085 |
| chr2 | 3000001  | 3100000  | 984  | 1055 | 3050000  | -0.17288 | 0.00711986  |
| chr2 | 3050001  | 3150000  | 993  | 1049 | 3100000  | -0.15152 | 0.015803268 |
| chr2 | 3100001  | 3200000  | 1012 | 1154 | 3150000  | -0.26181 | 0.000107593 |
| chr2 | 3150001  | 3250000  | 982  | 1102 | 3200000  | -0.2387  | 0.000366251 |
| chr2 | 3200001  | 3300000  | 992  | 1077 | 3250000  | -0.19098 | 0.003401516 |
| chr2 | 3250001  | 3350000  | 1004 | 1087 | 3300000  | -0.18696 | 0.004027354 |
| chr2 | 3350001  | 3450000  | 919  | 968  | 3400000  | -0.14731 | 0.018315078 |
| chr2 | 3400001  | 3500000  | 1051 | 1165 | 3450000  | -0.22094 | 0.000880366 |
| chr2 | 3450001  | 3550000  | 830  | 880  | 3500000  | -0.15676 | 0.013092103 |
| chr2 | 3600001  | 3700000  | 915  | 977  | 3650000  | -0.16696 | 0.008954498 |
| chr2 | 3650001  | 3750000  | 971  | 1009 | 3700000  | -0.12775 | 0.034911807 |
| chr2 | 3750001  | 3850000  | 1000 | 1043 | 3800000  | -0.13311 | 0.029453252 |
| chr2 | 4000001  | 4100000  | 1036 | 1088 | 4050000  | -0.14303 | 0.021218302 |
| chr2 | 4300001  | 4400000  | 1011 | 872  | 4350000  | 0.141011 | 0.022976764 |
| chr2 | 5050001  | 5150000  | 235  | 249  | 5100000  | -0.15586 | 0.013530158 |
| chr2 | 6350001  | 6450000  | 1100 | 921  | 6400000  | 0.183859 | 0.004692384 |
| chr2 | 6500001  | 6600000  | 963  | 995  | 6550000  | -0.11953 | 0.044887152 |
| chr2 | 7050001  | 7150000  | 1057 | 1109 | 7100000  | -0.14166 | 0.022225003 |
| chr2 | 7100001  | 7200000  | 1034 | 1139 | 7150000  | -0.2119  | 0.001345957 |
| chr2 | 7150001  | 7250000  | 1077 | 1146 | 7200000  | -0.16196 | 0.010812269 |
| chr2 | 7450001  | 7550000  | 986  | 1022 | 7500000  | -0.12411 | 0.039085578 |
| chr2 | 8500001  | 8600000  | 1027 | 1090 | 8550000  | -0.15826 | 0.012394852 |
| chr2 | 8550001  | 8650000  | 1031 | 1120 | 8600000  | -0.19183 | 0.003281047 |
| chr2 | 8700001  | 8800000  | 1073 | 1204 | 8750000  | -0.23856 | 0.000368948 |
| chr2 | 8750001  | 8850000  | 1016 | 1116 | 8800000  | -0.20781 | 0.001623675 |
| chr2 | 9900001  | 10000000 | 993  | 1035 | 9950000  | -0.13214 | 0.030389383 |
| chr2 | 10100001 | 10200000 | 1029 | 1102 | 10150000 | -0.17125 | 0.007588486 |
| chr2 | 10150001 | 10250000 | 938  | 1030 | 10200000 | -0.20736 | 0.001657349 |
| chr2 | 10200001 | 10300000 | 850  | 877  | 10250000 | -0.11749 | 0.047698533 |
| chr2 | 10250001 | 10350000 | 916  | 972  | 10300000 | -0.15798 | 0.012524006 |
| chr2 | 10300001 | 10400000 | 1059 | 1109 | 10350000 | -0.13893 | 0.024348652 |
| chr2 | 10400001 | 10500000 | 1018 | 1082 | 10450000 | -0.16033 | 0.011485155 |
| chr2 | 10450001 | 10550000 | 1019 | 1156 | 10500000 | -0.25436 | 0.000161342 |
| chr2 | 10500001 | 10600000 | 1052 | 1169 | 10550000 | -0.22451 | 0.000741331 |
| chr2 | 10550001 | 10650000 | 1022 | 1075 | 10600000 | -0.14531 | 0.019624629 |
| chr2 | 10700001 | 10800000 | 1046 | 910  | 10750000 | 0.128573 | 0.034335923 |
| chr2 | 11000001 | 11100000 | 1082 | 1128 | 11050000 | -0.13244 | 0.030097078 |
| chr2 | 11050001 | 11150000 | 987  | 1071 | 11100000 | -0.19021 | 0.003514278 |
| chr2 | 11100001 | 11200000 | 972  | 1002 | 11150000 | -0.11623 | 0.049498002 |
| chr2 | 11300001 | 11400000 | 1003 | 849  | 11350000 | 0.168113 | 0.00872996  |
| chr2 | 11350001 | 11450000 | 1030 | 798  | 11400000 | 0.295812 | 1.64E-05    |
| chr2 | 11400001 | 11500000 | 1006 | 788  | 11450000 | 0.279991 | 4.15E-05    |
| chr2 | 11500001 | 11600000 | 896  | 999  | 11550000 | -0.22936 | 0.000585039 |
| chr2 | 11550001 | 11650000 | 903  | 959  | 11600000 | -0.15918 | 0.011986426 |

|      |          |          |      |      |          |          |             |
|------|----------|----------|------|------|----------|----------|-------------|
| chr2 | 11700001 | 11800000 | 1015 | 1066 | 11750000 | -0.1431  | 0.021165672 |
| chr2 | 11750001 | 11850000 | 1057 | 1105 | 11800000 | -0.13644 | 0.026430626 |
| chr2 | 11800001 | 11900000 | 1041 | 1086 | 11850000 | -0.13343 | 0.029155803 |
| chr2 | 11850001 | 11950000 | 1000 | 1055 | 11900000 | -0.14961 | 0.016902064 |
| chr2 | 13100001 | 13200000 | 1027 | 891  | 13150000 | 0.132567 | 0.030267707 |
| chr2 | 13300001 | 13400000 | 976  | 847  | 13350000 | 0.132147 | 0.030675346 |
| chr2 | 13450001 | 13550000 | 799  | 695  | 13500000 | 0.128811 | 0.034081362 |
| chr2 | 13550001 | 13650000 | 829  | 719  | 13600000 | 0.133009 | 0.029843748 |
| chr2 | 13600001 | 13700000 | 987  | 859  | 13650000 | 0.12802  | 0.034932549 |
| chr2 | 13750001 | 13850000 | 976  | 843  | 13800000 | 0.138977 | 0.024581732 |
| chr2 | 13900001 | 14000000 | 995  | 846  | 13950000 | 0.161667 | 0.011117102 |
| chr2 | 13950001 | 14050000 | 1022 | 857  | 1.40E+07 | 0.181656 | 0.005131396 |
| chr2 | 14000001 | 14100000 | 966  | 830  | 14050000 | 0.14654  | 0.019056067 |
| chr2 | 14300001 | 14400000 | 1011 | 881  | 14350000 | 0.126197 | 0.03696206  |
| chr2 | 14450001 | 14550000 | 1079 | 896  | 14500000 | 0.195752 | 0.002852828 |
| chr2 | 14750001 | 14850000 | 1005 | 1076 | 14800000 | -0.17085 | 0.007707055 |
| chr2 | 14800001 | 14900000 | 981  | 1043 | 14850000 | -0.16079 | 0.011294867 |
| chr2 | 15550001 | 15650000 | 907  | 955  | 15600000 | -0.14677 | 0.018663544 |
| chr2 | 15800001 | 15900000 | 1049 | 1084 | 15850000 | -0.11972 | 0.044633961 |
| chr2 | 15850001 | 15950000 | 1092 | 1159 | 15900000 | -0.15828 | 0.012387701 |
| chr2 | 16050001 | 16150000 | 921  | 975  | 16100000 | -0.15457 | 0.014171766 |
| chr2 | 16100001 | 16200000 | 940  | 991  | 16150000 | -0.1486  | 0.017515723 |
| chr2 | 17250001 | 17350000 | 1067 | 935  | 17300000 | 0.11815  | 0.047107474 |
| chr2 | 17650001 | 17750000 | 1065 | 918  | 17700000 | 0.141916 | 0.022292237 |
| chr2 | 17700001 | 17800000 | 1111 | 916  | 17750000 | 0.206068 | 0.001816175 |
| chr2 | 17750001 | 17850000 | 1127 | 956  | 17800000 | 0.165033 | 0.00980761  |
| chr2 | 18100001 | 18200000 | 949  | 799  | 18150000 | 0.175841 | 0.006471938 |
| chr2 | 18850001 | 18950000 | 1020 | 891  | 18900000 | 0.1227   | 0.041126447 |
| chr2 | 18900001 | 19000000 | 1095 | 959  | 18950000 | 0.118956 | 0.045999363 |
| chr2 | 19050001 | 19150000 | 1012 | 842  | 19100000 | 0.192945 | 0.003215505 |
| chr2 | 19150001 | 19250000 | 653  | 683  | 19200000 | -0.13717 | 0.025802933 |
| chr2 | 19950001 | 20050000 | 1108 | 1142 | 2.00E+07 | -0.11598 | 0.0498608   |
| chr2 | 20250001 | 20350000 | 949  | 1110 | 20300000 | -0.29845 | 1.27E-05    |
| chr2 | 20300001 | 20400000 | 1082 | 1242 | 20350000 | -0.27134 | 6.31E-05    |
| chr2 | 20350001 | 20450000 | 1086 | 1184 | 20400000 | -0.19702 | 0.002623993 |
| chr2 | 20400001 | 20500000 | 995  | 1052 | 20450000 | -0.15274 | 0.015134176 |
| chr2 | 20650001 | 20750000 | 982  | 1026 | 20700000 | -0.13561 | 0.027162789 |
| chr2 | 20750001 | 20850000 | 1146 | 1204 | 20800000 | -0.1436  | 0.020808469 |
| chr2 | 20800001 | 20900000 | 1093 | 1212 | 20850000 | -0.22147 | 0.000858367 |
| chr2 | 20850001 | 20950000 | 987  | 1044 | 20900000 | -0.15337 | 0.014795733 |
| chr2 | 21000001 | 21100000 | 1039 | 911  | 21050000 | 0.117301 | 0.048297766 |
| chr2 | 21200001 | 21300000 | 1077 | 1116 | 21250000 | -0.12369 | 0.039587523 |
| chr2 | 21500001 | 21600000 | 958  | 1008 | 21550000 | -0.14577 | 0.019318939 |
| chr2 | 21750001 | 21850000 | 1010 | 861  | 21800000 | 0.157898 | 0.012761703 |
| chr2 | 22250001 | 22350000 | 1018 | 873  | 22300000 | 0.149312 | 0.017315298 |
| chr2 | 22400001 | 22500000 | 996  | 869  | 22450000 | 0.124418 | 0.039035623 |
| chr2 | 23250001 | 23350000 | 1033 | 1065 | 23300000 | -0.11638 | 0.049268087 |

|      |          |          |      |      |          |          |             |
|------|----------|----------|------|------|----------|----------|-------------|
| chr2 | 23550001 | 23650000 | 1090 | 1150 | 23600000 | -0.14968 | 0.016864887 |
| chr2 | 23600001 | 23700000 | 1070 | 1159 | 23650000 | -0.18764 | 0.003915014 |
| chr2 | 23650001 | 23750000 | 1054 | 1149 | 23700000 | -0.19688 | 0.002640143 |
| chr2 | 23700001 | 23800000 | 1118 | 1278 | 23750000 | -0.26534 | 8.85E-05    |
| chr2 | 23750001 | 23850000 | 1109 | 1192 | 23800000 | -0.1765  | 0.006172355 |
| chr2 | 23800001 | 23900000 | 1084 | 1153 | 23850000 | -0.1614  | 0.011040471 |
| chr2 | 23850001 | 23950000 | 1088 | 1180 | 23900000 | -0.18948 | 0.003624039 |
| chr2 | 23900001 | 24000000 | 959  | 1006 | 23950000 | -0.1414  | 0.022417753 |
| chr2 | 24000001 | 24100000 | 934  | 800  | 24050000 | 0.151051 | 0.016294619 |
| chr2 | 24050001 | 24150000 | 861  | 741  | 24100000 | 0.144168 | 0.02066218  |
| chr2 | 24650001 | 24750000 | 919  | 771  | 24700000 | 0.180962 | 0.005277164 |
| chr2 | 24700001 | 24800000 | 972  | 798  | 24750000 | 0.212196 | 0.001376647 |
| chr2 | 24800001 | 24900000 | 1025 | 897  | 24850000 | 0.120072 | 0.044500477 |
| chr2 | 24850001 | 24950000 | 1012 | 844  | 24900000 | 0.189523 | 0.003713759 |
| chr2 | 24900001 | 25000000 | 1038 | 808  | 24950000 | 0.289007 | 2.46E-05    |
| chr2 | 24950001 | 25050000 | 939  | 796  | 2.50E+07 | 0.165985 | 0.009462807 |
| chr2 | 25450001 | 25550000 | 1033 | 1105 | 25500000 | -0.16958 | 0.00809776  |
| chr2 | 25500001 | 25600000 | 1017 | 1140 | 25550000 | -0.23709 | 0.00039758  |
| chr2 | 26100001 | 26200000 | 807  | 843  | 26150000 | -0.13534 | 0.027404727 |
| chr2 | 26650001 | 26750000 | 1150 | 1233 | 26700000 | -0.17291 | 0.007112559 |
| chr2 | 26850001 | 26950000 | 1100 | 1156 | 26900000 | -0.14401 | 0.02052009  |
| chr2 | 27300001 | 27400000 | 984  | 1027 | 27350000 | -0.13408 | 0.028547906 |
| chr2 | 27850001 | 27950000 | 985  | 858  | 27900000 | 0.126774 | 0.036309438 |
| chr2 | 28300001 | 28400000 | 1051 | 896  | 28350000 | 0.15782  | 0.012797919 |
| chr2 | 28350001 | 28450000 | 1065 | 908  | 28400000 | 0.157717 | 0.012845715 |
| chr2 | 28550001 | 28650000 | 969  | 1106 | 28600000 | -0.26315 | 9.99E-05    |
| chr2 | 28600001 | 28700000 | 1017 | 1075 | 28650000 | -0.15239 | 0.015323636 |
| chr2 | 28750001 | 28850000 | 1023 | 1057 | 28800000 | -0.11954 | 0.044875756 |
| chr2 | 28900001 | 29000000 | 864  | 970  | 28950000 | -0.23933 | 0.000354773 |
| chr2 | 28950001 | 29050000 | 837  | 914  | 2.90E+07 | -0.19934 | 0.002370716 |
| chr2 | 29200001 | 29300000 | 1128 | 1168 | 29250000 | -0.12264 | 0.040869628 |
| chr2 | 29500001 | 29600000 | 1091 | 1155 | 29550000 | -0.15461 | 0.014151037 |
| chr2 | 29550001 | 29650000 | 1053 | 1139 | 29600000 | -0.18563 | 0.004256539 |
| chr2 | 29600001 | 29700000 | 1018 | 1083 | 29650000 | -0.16167 | 0.010930974 |
| chr2 | 30350001 | 30450000 | 983  | 1057 | 30400000 | -0.17708 | 0.006029393 |
| chr2 | 30850001 | 30950000 | 1022 | 1061 | 30900000 | -0.1264  | 0.036415748 |
| chr2 | 30900001 | 31000000 | 1040 | 1139 | 30950000 | -0.20356 | 0.001966628 |
| chr2 | 30950001 | 31050000 | 1059 | 1099 | 3.10E+07 | -0.12586 | 0.03703117  |
| chr2 | 31050001 | 31150000 | 948  | 1012 | 31100000 | -0.16662 | 0.009070138 |
| chr2 | 31100001 | 31200000 | 1107 | 1175 | 31150000 | -0.15838 | 0.012343385 |
| chr2 | 31150001 | 31250000 | 1166 | 1238 | 31200000 | -0.15882 | 0.012146654 |
| chr2 | 31300001 | 31400000 | 1087 | 1161 | 31350000 | -0.16739 | 0.008808874 |
| chr2 | 31350001 | 31450000 | 1078 | 1125 | 31400000 | -0.13394 | 0.028675824 |
| chr2 | 31400001 | 31500000 | 1008 | 1132 | 31450000 | -0.23975 | 0.000347152 |
| chr2 | 31450001 | 31550000 | 1005 | 1091 | 31500000 | -0.19083 | 0.003423322 |
| chr2 | 32250001 | 32350000 | 744  | 649  | 32300000 | 0.124712 | 0.038685945 |
| chr2 | 32550001 | 32650000 | 878  | 731  | 32600000 | 0.191978 | 0.003349857 |



|      |          |          |      |      |          |          |             |
|------|----------|----------|------|------|----------|----------|-------------|
| chr2 | 32600001 | 32700000 | 929  | 815  | 32650000 | 0.116507 | 0.049432629 |
| chr2 | 32700001 | 32800000 | 965  | 828  | 32750000 | 0.148526 | 0.017794341 |
| chr2 | 32900001 | 33000000 | 991  | 856  | 32950000 | 0.138902 | 0.024642055 |
| chr2 | 33550001 | 33650000 | 1000 | 872  | 33600000 | 0.125228 | 0.038079817 |
| chr2 | 33600001 | 33700000 | 986  | 805  | 33650000 | 0.220227 | 0.000948004 |
| chr2 | 33950001 | 34050000 | 957  | 825  | 3.40E+07 | 0.141753 | 0.02241399  |
| chr2 | 34250001 | 34350000 | 1071 | 885  | 34300000 | 0.202837 | 0.002096236 |
| chr2 | 34400001 | 34500000 | 1072 | 903  | 34450000 | 0.175135 | 0.006654106 |
| chr2 | 34600001 | 34700000 | 1011 | 853  | 34650000 | 0.172794 | 0.007291706 |
| chr2 | 34650001 | 34750000 | 905  | 792  | 34700000 | 0.120046 | 0.044535818 |
| chr2 | 34950001 | 35050000 | 938  | 808  | 3.50E+07 | 0.142861 | 0.02159533  |
| chr2 | 35000001 | 35100000 | 942  | 810  | 35050000 | 0.145433 | 0.019791615 |
| chr2 | 35050001 | 35150000 | 1027 | 895  | 35100000 | 0.126105 | 0.037067549 |
| chr2 | 35250001 | 35350000 | 989  | 866  | 35300000 | 0.119232 | 0.045625774 |
| chr2 | 35300001 | 35400000 | 996  | 840  | 35350000 | 0.173385 | 0.007125864 |
| chr2 | 35350001 | 35450000 | 1033 | 826  | 35400000 | 0.250255 | 0.000212754 |
| chr2 | 35400001 | 35500000 | 974  | 833  | 35450000 | 0.153234 | 0.015086748 |
| chr2 | 35600001 | 35700000 | 991  | 860  | 35650000 | 0.132177 | 0.030646817 |
| chr2 | 35650001 | 35750000 | 965  | 805  | 35700000 | 0.189168 | 0.003769102 |
| chr2 | 35800001 | 35900000 | 1102 | 940  | 35850000 | 0.15702  | 0.013174187 |
| chr2 | 35850001 | 35950000 | 1088 | 913  | 35900000 | 0.18062  | 0.005350384 |
| chr2 | 36250001 | 36350000 | 787  | 839  | 36300000 | -0.16468 | 0.009763913 |
| chr2 | 37050001 | 37150000 | 908  | 785  | 37100000 | 0.137628 | 0.025697103 |
| chr2 | 38550001 | 38650000 | 865  | 753  | 38600000 | 0.127678 | 0.035305814 |
| chr2 | 38650001 | 38750000 | 901  | 951  | 38700000 | -0.15029 | 0.016505539 |
| chr2 | 38700001 | 38800000 | 900  | 973  | 38750000 | -0.18489 | 0.004390383 |
| chr2 | 38800001 | 38900000 | 945  | 816  | 38850000 | 0.139373 | 0.0242616   |
| chr2 | 38850001 | 38950000 | 845  | 738  | 38900000 | 0.122959 | 0.040805839 |
| chr2 | 39050001 | 39150000 | 944  | 820  | 39100000 | 0.130791 | 0.032024017 |
| chr2 | 39100001 | 39200000 | 1010 | 879  | 39150000 | 0.128048 | 0.034901813 |
| chr2 | 39350001 | 39450000 | 925  | 787  | 39400000 | 0.160718 | 0.011512772 |
| chr2 | 39400001 | 39500000 | 972  | 831  | 39450000 | 0.153736 | 0.014819842 |
| chr2 | 39450001 | 39550000 | 984  | 834  | 39500000 | 0.166239 | 0.009372531 |
| chr2 | 39500001 | 39600000 | 1008 | 866  | 39550000 | 0.146685 | 0.01896154  |
| chr2 | 39800001 | 39900000 | 909  | 952  | 39850000 | -0.13905 | 0.02424811  |
| chr2 | 40300001 | 40400000 | 984  | 1025 | 40350000 | -0.13127 | 0.031247765 |
| chr2 | 40750001 | 40850000 | 1091 | 952  | 40800000 | 0.124246 | 0.039240917 |
| chr2 | 40800001 | 40900000 | 1093 | 942  | 40850000 | 0.142123 | 0.022137968 |
| chr2 | 40850001 | 40950000 | 1027 | 869  | 40900000 | 0.168636 | 0.008557728 |
| chr2 | 40900001 | 41000000 | 1000 | 865  | 40950000 | 0.136856 | 0.026354106 |
| chr2 | 41050001 | 41150000 | 1076 | 903  | 41100000 | 0.180508 | 0.005374459 |
| chr2 | 41100001 | 41200000 | 1078 | 903  | 41150000 | 0.183188 | 0.004822471 |
| chr2 | 41300001 | 41400000 | 943  | 806  | 41350000 | 0.154106 | 0.014625901 |
| chr2 | 41700001 | 41800000 | 1009 | 881  | 41750000 | 0.12334  | 0.040336504 |
| chr2 | 42500001 | 42600000 | 910  | 959  | 42550000 | -0.14804 | 0.017861135 |
| chr2 | 42550001 | 42650000 | 909  | 965  | 42600000 | -0.15862 | 0.012233848 |
| chr2 | 42600001 | 42700000 | 907  | 788  | 42650000 | 0.130535 | 0.032284055 |

|      |          |          |      |      |          |          |             |
|------|----------|----------|------|------|----------|----------|-------------|
| chr2 | 42650001 | 42750000 | 879  | 711  | 42700000 | 0.233642 | 0.000495808 |
| chr2 | 43300001 | 43400000 | 1062 | 1108 | 43350000 | -0.13355 | 0.029043029 |
| chr2 | 43350001 | 43450000 | 1010 | 1075 | 43400000 | -0.16235 | 0.010655049 |
| chr2 | 43600001 | 43700000 | 1083 | 926  | 43650000 | 0.153577 | 0.014903679 |
| chr2 | 43650001 | 43750000 | 1032 | 875  | 43700000 | 0.165716 | 0.009559052 |
| chr2 | 43800001 | 43900000 | 937  | 803  | 43850000 | 0.150277 | 0.016742157 |
| chr2 | 44250001 | 44350000 | 909  | 786  | 44300000 | 0.137379 | 0.025907292 |
| chr2 | 44300001 | 44400000 | 962  | 829  | 44350000 | 0.142293 | 0.022011726 |
| chr2 | 44350001 | 44450000 | 964  | 843  | 44400000 | 0.121129 | 0.043117984 |
| chr2 | 44700001 | 44800000 | 997  | 867  | 44750000 | 0.12919  | 0.033679429 |
| chr2 | 45000001 | 45100000 | 990  | 1039 | 45050000 | -0.14207 | 0.021918787 |
| chr2 | 45100001 | 45200000 | 1077 | 1113 | 45150000 | -0.11981 | 0.044520328 |
| chr2 | 45150001 | 45250000 | 1056 | 1150 | 45200000 | -0.1954  | 0.002815104 |
| chr2 | 46550001 | 46650000 | 1099 | 1187 | 46600000 | -0.1835  | 0.004648611 |
| chr2 | 46650001 | 46750000 | 954  | 1027 | 46700000 | -0.17875 | 0.005640349 |
| chr2 | 46700001 | 46800000 | 960  | 1014 | 46750000 | -0.15132 | 0.015914315 |
| chr2 | 47050001 | 47150000 | 1088 | 1133 | 47100000 | -0.13084 | 0.031673005 |
| chr2 | 47100001 | 47200000 | 994  | 1078 | 47150000 | -0.18941 | 0.00363458  |
| chr2 | 47150001 | 47250000 | 1024 | 1069 | 47200000 | -0.13442 | 0.028234923 |
| chr2 | 47750001 | 47850000 | 985  | 1035 | 47800000 | -0.14381 | 0.020662425 |
| chr2 | 48100001 | 48200000 | 927  | 790  | 48150000 | 0.158345 | 0.012556393 |
| chr2 | 48150001 | 48250000 | 876  | 755  | 48200000 | 0.142082 | 0.022167855 |
| chr2 | 48400001 | 48500000 | 1073 | 898  | 48450000 | 0.184491 | 0.004572721 |
| chr2 | 49000001 | 49100000 | 973  | 1016 | 49050000 | -0.13476 | 0.02792265  |
| chr2 | 49150001 | 49250000 | 948  | 1016 | 49200000 | -0.17231 | 0.00728097  |
| chr2 | 49550001 | 49650000 | 1044 | 907  | 49600000 | 0.130575 | 0.032242972 |
| chr2 | 49600001 | 49700000 | 1016 | 831  | 49650000 | 0.217608 | 0.001071954 |
| chr2 | 49650001 | 49750000 | 922  | 807  | 49700000 | 0.119826 | 0.044827398 |
| chr2 | 50200001 | 50300000 | 1049 | 860  | 50250000 | 0.214234 | 0.00125361  |
| chr2 | 50250001 | 50350000 | 1032 | 901  | 50300000 | 0.123472 | 0.04017559  |
| chr2 | 50350001 | 50450000 | 1055 | 925  | 50400000 | 0.117346 | 0.048234045 |
| chr2 | 50400001 | 50500000 | 1064 | 928  | 50450000 | 0.12493  | 0.038429648 |
| chr2 | 50900001 | 51000000 | 1087 | 952  | 50950000 | 0.118947 | 0.046012552 |
| chr2 | 51250001 | 51350000 | 1114 | 975  | 51300000 | 0.119903 | 0.044724795 |
| chr2 | 51350001 | 51450000 | 1021 | 858  | 51400000 | 0.178562 | 0.005810258 |
| chr2 | 51400001 | 51500000 | 1025 | 888  | 51450000 | 0.134621 | 0.028337513 |
| chr2 | 51600001 | 51700000 | 985  | 829  | 51650000 | 0.17638  | 0.006335764 |
| chr2 | 51750001 | 51850000 | 948  | 824  | 51800000 | 0.129871 | 0.032966817 |
| chr2 | 52050001 | 52150000 | 961  | 842  | 52100000 | 0.118344 | 0.046838492 |
| chr2 | 52100001 | 52200000 | 997  | 873  | 52150000 | 0.11924  | 0.045614476 |
| chr2 | 52650001 | 52750000 | 1033 | 903  | 52700000 | 0.121671 | 0.04242257  |
| chr2 | 52700001 | 52800000 | 855  | 724  | 52750000 | 0.167563 | 0.008914527 |
| chr2 | 53250001 | 53350000 | 975  | 840  | 53300000 | 0.142641 | 0.021755666 |
| chr2 | 53300001 | 53400000 | 988  | 849  | 53350000 | 0.146375 | 0.019164469 |
| chr2 | 53950001 | 54050000 | 914  | 961  | 5.40E+07 | -0.14471 | 0.020032013 |
| chr2 | 54200001 | 54300000 | 892  | 775  | 54250000 | 0.130476 | 0.032344758 |
| chr2 | 54700001 | 54800000 | 979  | 1014 | 54750000 | -0.12305 | 0.040370679 |

|      |          |          |      |      |          |          |             |
|------|----------|----------|------|------|----------|----------|-------------|
| chr2 | 54750001 | 54850000 | 1061 | 1095 | 54800000 | -0.11788 | 0.047149111 |
| chr2 | 55500001 | 55600000 | 996  | 825  | 55550000 | 0.19938  | 0.002439095 |
| chr2 | 55550001 | 55650000 | 1005 | 816  | 55600000 | 0.228183 | 0.000647905 |
| chr2 | 56150001 | 56250000 | 1076 | 925  | 56200000 | 0.145781 | 0.01955799  |
| chr2 | 56200001 | 56300000 | 1016 | 885  | 56250000 | 0.126779 | 0.036303864 |
| chr2 | 56700001 | 56800000 | 983  | 852  | 56750000 | 0.133966 | 0.028941089 |
| chr2 | 56750001 | 56850000 | 961  | 780  | 56800000 | 0.228691 | 0.000632116 |
| chr2 | 56800001 | 56900000 | 898  | 742  | 56850000 | 0.202924 | 0.002088192 |
| chr2 | 57000001 | 57100000 | 955  | 825  | 57050000 | 0.138735 | 0.024778705 |
| chr2 | 57400001 | 57500000 | 919  | 739  | 57450000 | 0.242119 | 0.000323911 |
| chr2 | 57450001 | 57550000 | 844  | 695  | 57500000 | 0.207858 | 0.00167606  |
| chr2 | 57550001 | 57650000 | 971  | 829  | 57600000 | 0.155727 | 0.013801928 |
| chr2 | 57600001 | 57700000 | 978  | 849  | 57650000 | 0.131698 | 0.031116783 |
| chr2 | 58250001 | 58350000 | 1008 | 858  | 58300000 | 0.160074 | 0.011788083 |
| chr2 | 58300001 | 58400000 | 960  | 825  | 58350000 | 0.146269 | 0.019234364 |
| chr2 | 58500001 | 58600000 | 950  | 805  | 58550000 | 0.166567 | 0.009257236 |
| chr2 | 58600001 | 58700000 | 959  | 993  | 58650000 | -0.12263 | 0.040882429 |
| chr2 | 58900001 | 59000000 | 1019 | 889  | 58950000 | 0.124527 | 0.038905742 |
| chr2 | 59050001 | 59150000 | 1090 | 955  | 59100000 | 0.118384 | 0.046784236 |
| chr2 | 59850001 | 59950000 | 1064 | 925  | 59900000 | 0.129601 | 0.033247591 |
| chr2 | 60600001 | 60700000 | 941  | 1000 | 60650000 | -0.16011 | 0.011583043 |
| chr2 | 60650001 | 60750000 | 1045 | 1098 | 60700000 | -0.14375 | 0.020704728 |
| chr2 | 60900001 | 61000000 | 913  | 798  | 60950000 | 0.121854 | 0.042188818 |
| chr2 | 61050001 | 61150000 | 954  | 830  | 61100000 | 0.128506 | 0.034407262 |
| chr2 | 61100001 | 61200000 | 920  | 785  | 61150000 | 0.156569 | 0.013390068 |
| chr2 | 61150001 | 61250000 | 942  | 809  | 61200000 | 0.147216 | 0.018618672 |
| chr2 | 61200001 | 61300000 | 912  | 787  | 61250000 | 0.140298 | 0.023528683 |
| chr2 | 61250001 | 61350000 | 896  | 766  | 61300000 | 0.153783 | 0.014795352 |
| chr2 | 61350001 | 61450000 | 897  | 928  | 61400000 | -0.12139 | 0.042454685 |
| chr2 | 61500001 | 61600000 | 969  | 845  | 61550000 | 0.125174 | 0.038143648 |
| chr2 | 61550001 | 61650000 | 952  | 777  | 61600000 | 0.220675 | 0.000928169 |
| chr2 | 61800001 | 61900000 | 838  | 730  | 61850000 | 0.126682 | 0.03641319  |
| chr2 | 62550001 | 62650000 | 876  | 904  | 62600000 | -0.11776 | 0.047308713 |
| chr2 | 63800001 | 63900000 | 1019 | 893  | 63850000 | 0.11805  | 0.04724631  |
| chr2 | 64200001 | 64300000 | 964  | 815  | 64250000 | 0.169861 | 0.008165947 |
| chr2 | 64350001 | 64450000 | 1038 | 906  | 64400000 | 0.123852 | 0.039714833 |
| chr2 | 64400001 | 64500000 | 983  | 854  | 64450000 | 0.130584 | 0.032234737 |
| chr2 | 64850001 | 64950000 | 964  | 1018 | 64900000 | -0.151   | 0.016094803 |
| chr2 | 65400001 | 65500000 | 849  | 741  | 65450000 | 0.123919 | 0.039633312 |
| chr2 | 66750001 | 66850000 | 851  | 890  | 66800000 | -0.13702 | 0.025936045 |
| chr2 | 66850001 | 66950000 | 962  | 823  | 66900000 | 0.152773 | 0.015335116 |
| chr2 | 67000001 | 67100000 | 1074 | 925  | 67050000 | 0.143097 | 0.021424179 |
| chr2 | 67050001 | 67150000 | 1061 | 905  | 67100000 | 0.157063 | 0.013153545 |
| chr2 | 67150001 | 67250000 | 1120 | 950  | 67200000 | 0.165128 | 0.009772954 |
| chr2 | 67200001 | 67300000 | 1124 | 909  | 67250000 | 0.233918 | 0.000489074 |
| chr2 | 67250001 | 67350000 | 1094 | 874  | 67300000 | 0.251536 | 0.000198922 |
| chr2 | 67300001 | 67400000 | 1037 | 853  | 67350000 | 0.209426 | 0.001561542 |

|      |          |          |      |      |          |          |             |
|------|----------|----------|------|------|----------|----------|-------------|
| chr2 | 67450001 | 67550000 | 1108 | 903  | 67500000 | 0.222788 | 0.000839689 |
| chr2 | 67500001 | 67600000 | 922  | 797  | 67550000 | 0.137815 | 0.025539659 |
| chr2 | 67600001 | 67700000 | 1052 | 920  | 67650000 | 0.121057 | 0.043210534 |
| chr2 | 68550001 | 68650000 | 970  | 814  | 68600000 | 0.180584 | 0.005358105 |
| chr2 | 68600001 | 68700000 | 986  | 852  | 68650000 | 0.138362 | 0.025084531 |
| chr2 | 69100001 | 69200000 | 985  | 1058 | 69150000 | -0.17552 | 0.006417892 |
| chr2 | 69250001 | 69350000 | 1066 | 1101 | 69300000 | -0.11898 | 0.045634181 |
| chr2 | 69300001 | 69400000 | 1059 | 1094 | 69350000 | -0.11928 | 0.045223993 |
| chr2 | 69900001 | 70000000 | 989  | 858  | 69950000 | 0.132621 | 0.030215556 |
| chr2 | 70250001 | 70350000 | 926  | 809  | 70300000 | 0.122501 | 0.041374857 |
| chr2 | 70800001 | 70900000 | 1079 | 940  | 70850000 | 0.12659  | 0.036516374 |
| chr2 | 71150001 | 71250000 | 977  | 1027 | 71200000 | -0.14438 | 0.020263966 |
| chr2 | 71200001 | 71300000 | 653  | 763  | 71250000 | -0.29697 | 1.39E-05    |
| chr2 | 71250001 | 71350000 | 621  | 668  | 71300000 | -0.17763 | 0.005899867 |
| chr2 | 71500001 | 71600000 | 876  | 911  | 71550000 | -0.12889 | 0.033688058 |
| chr2 | 71700001 | 71800000 | 1042 | 1117 | 71750000 | -0.17265 | 0.00718683  |
| chr2 | 71750001 | 71850000 | 1119 | 1270 | 71800000 | -0.25499 | 0.000155955 |
| chr2 | 71800001 | 71900000 | 1129 | 1286 | 71850000 | -0.26022 | 0.000117405 |
| chr2 | 71850001 | 71950000 | 1101 | 1196 | 71900000 | -0.19177 | 0.003288248 |
| chr2 | 71900001 | 72000000 | 1079 | 1124 | 71950000 | -0.13132 | 0.031194513 |
| chr2 | 71950001 | 72050000 | 1096 | 1167 | 7.20E+07 | -0.16293 | 0.010428217 |
| chr2 | 72000001 | 72100000 | 1168 | 1206 | 72050000 | -0.11856 | 0.046203916 |
| chr2 | 72150001 | 72250000 | 1087 | 950  | 72200000 | 0.121981 | 0.042028621 |
| chr2 | 72550001 | 72650000 | 993  | 851  | 72600000 | 0.150263 | 0.016750632 |
| chr2 | 72700001 | 72800000 | 1038 | 902  | 72750000 | 0.130235 | 0.032590786 |
| chr2 | 73050001 | 73150000 | 984  | 1044 | 73100000 | -0.15776 | 0.012623848 |
| chr2 | 73100001 | 73200000 | 1082 | 1205 | 73150000 | -0.2277  | 0.000634561 |
| chr2 | 73250001 | 73350000 | 991  | 1099 | 73300000 | -0.22161 | 0.000852707 |
| chr2 | 73300001 | 73400000 | 938  | 993  | 73350000 | -0.15458 | 0.014169353 |
| chr2 | 73400001 | 73500000 | 950  | 996  | 73450000 | -0.14059 | 0.023035478 |
| chr2 | 73650001 | 73750000 | 844  | 877  | 73700000 | -0.12771 | 0.03496549  |
| chr2 | 73850001 | 73950000 | 595  | 630  | 73900000 | -0.15483 | 0.014039201 |
| chr2 | 74600001 | 74700000 | 981  | 1040 | 74650000 | -0.15663 | 0.01315588  |
| chr2 | 74650001 | 74750000 | 938  | 1053 | 74700000 | -0.23922 | 0.000356732 |
| chr2 | 74700001 | 74800000 | 997  | 1128 | 74750000 | -0.25047 | 0.000198549 |
| chr2 | 74750001 | 74850000 | 1048 | 1086 | 74800000 | -0.12376 | 0.039506969 |
| chr2 | 75450001 | 75550000 | 1122 | 958  | 75500000 | 0.155603 | 0.013863537 |
| chr2 | 75500001 | 75600000 | 1055 | 920  | 75550000 | 0.125165 | 0.038153109 |
| chr2 | 76650001 | 76750000 | 1034 | 856  | 76700000 | 0.200182 | 0.002355331 |
| chr2 | 76700001 | 76800000 | 1021 | 852  | 76750000 | 0.188686 | 0.0038457   |
| chr2 | 76750001 | 76850000 | 967  | 838  | 76800000 | 0.134194 | 0.028729887 |
| chr2 | 76850001 | 76950000 | 974  | 852  | 76900000 | 0.120697 | 0.043679243 |
| chr2 | 76900001 | 77000000 | 978  | 851  | 76950000 | 0.128304 | 0.034625449 |
| chr2 | 77050001 | 77150000 | 967  | 836  | 77100000 | 0.137641 | 0.025685898 |
| chr2 | 77300001 | 77400000 | 872  | 734  | 77350000 | 0.176176 | 0.006386884 |
| chr2 | 77350001 | 77450000 | 867  | 760  | 77400000 | 0.117661 | 0.047790426 |
| chr2 | 77400001 | 77500000 | 982  | 828  | 77450000 | 0.17372  | 0.007033129 |

|      |          |          |      |      |          |          |             |
|------|----------|----------|------|------|----------|----------|-------------|
| chr2 | 77450001 | 77550000 | 1026 | 860  | 77500000 | 0.18225  | 0.005009499 |
| chr2 | 77600001 | 77700000 | 1059 | 925  | 77650000 | 0.122806 | 0.040995454 |
| chr2 | 77700001 | 77800000 | 977  | 851  | 77750000 | 0.126828 | 0.036249573 |
| chr2 | 77800001 | 77900000 | 904  | 771  | 77850000 | 0.15722  | 0.013079121 |
| chr2 | 77850001 | 77950000 | 829  | 713  | 77900000 | 0.145098 | 0.020019066 |
| chr2 | 77950001 | 78050000 | 928  | 756  | 7.80E+07 | 0.223367 | 0.000816858 |
| chr2 | 78000001 | 78100000 | 929  | 800  | 78050000 | 0.143307 | 0.021273003 |
| chr2 | 78100001 | 78200000 | 997  | 860  | 78150000 | 0.140885 | 0.023073612 |
| chr2 | 78150001 | 78250000 | 1024 | 861  | 78200000 | 0.177759 | 0.005998924 |
| chr2 | 78350001 | 78450000 | 998  | 831  | 78400000 | 0.19182  | 0.003372297 |
| chr2 | 78400001 | 78500000 | 1051 | 880  | 78450000 | 0.183815 | 0.004700665 |
| chr2 | 78450001 | 78550000 | 962  | 842  | 78500000 | 0.119845 | 0.044802628 |
| chr2 | 78500001 | 78600000 | 980  | 855  | 78550000 | 0.124486 | 0.038954956 |
| chr2 | 78700001 | 78800000 | 1000 | 846  | 78750000 | 0.168899 | 0.008472462 |
| chr2 | 78750001 | 78850000 | 1045 | 866  | 78800000 | 0.198692 | 0.002513069 |
| chr2 | 80350001 | 80450000 | 1027 | 863  | 80400000 | 0.178632 | 0.005793965 |
| chr2 | 80450001 | 80550000 | 1007 | 1133 | 80500000 | -0.24246 | 0.000302085 |
| chr2 | 80500001 | 80600000 | 1003 | 1104 | 80550000 | -0.21079 | 0.001416781 |
| chr2 | 80750001 | 80850000 | 1057 | 923  | 80800000 | 0.123201 | 0.040507417 |
| chr2 | 80900001 | 81000000 | 1033 | 891  | 80950000 | 0.140971 | 0.023007475 |
| chr2 | 81200001 | 81300000 | 1033 | 893  | 81250000 | 0.137736 | 0.025605814 |
| chr2 | 81250001 | 81350000 | 1048 | 904  | 81300000 | 0.140872 | 0.023083466 |
| chr2 | 81500001 | 81600000 | 939  | 783  | 81550000 | 0.189741 | 0.003679993 |
| chr2 | 81550001 | 81650000 | 996  | 769  | 81600000 | 0.30079  | 1.21E-05    |
| chr2 | 81600001 | 81700000 | 1078 | 909  | 81650000 | 0.173633 | 0.007057125 |
| chr2 | 82100001 | 82200000 | 948  | 797  | 82150000 | 0.177936 | 0.005956918 |
| chr2 | 82150001 | 82250000 | 977  | 810  | 82200000 | 0.198065 | 0.00258233  |
| chr2 | 82200001 | 82300000 | 1026 | 883  | 82250000 | 0.144174 | 0.020658192 |
| chr2 | 82800001 | 82900000 | 1096 | 929  | 82850000 | 0.166126 | 0.009412793 |
| chr2 | 82850001 | 82950000 | 1104 | 893  | 82900000 | 0.233636 | 0.000495944 |
| chr2 | 82900001 | 83000000 | 1021 | 875  | 82950000 | 0.150256 | 0.016754522 |
| chr2 | 83400001 | 83500000 | 1015 | 860  | 83450000 | 0.166699 | 0.009211011 |
| chr2 | 83500001 | 83600000 | 915  | 799  | 83550000 | 0.123204 | 0.040503222 |
| chr2 | 84000001 | 84100000 | 888  | 768  | 84050000 | 0.137082 | 0.026160758 |
| chr2 | 84050001 | 84150000 | 988  | 842  | 84100000 | 0.158319 | 0.012568212 |
| chr2 | 85000001 | 85100000 | 964  | 1050 | 85050000 | -0.19566 | 0.002783596 |
| chr2 | 85050001 | 85150000 | 936  | 1004 | 85100000 | -0.17355 | 0.006936028 |
| chr2 | 85400001 | 85500000 | 996  | 1033 | 85450000 | -0.12499 | 0.038034869 |
| chr2 | 85450001 | 85550000 | 951  | 993  | 85500000 | -0.13472 | 0.027959251 |
| chr2 | 85700001 | 85800000 | 900  | 789  | 85750000 | 0.117528 | 0.047977244 |
| chr2 | 85900001 | 86000000 | 1038 | 1185 | 85950000 | -0.26345 | 9.82E-05    |
| chr2 | 85950001 | 86050000 | 1128 | 1220 | 8.60E+07 | -0.18549 | 0.004282786 |
| chr2 | 86050001 | 86150000 | 958  | 998  | 86100000 | -0.13139 | 0.031127918 |
| chr2 | 86250001 | 86350000 | 1022 | 1067 | 86300000 | -0.13454 | 0.028126258 |
| chr2 | 87100001 | 87200000 | 69   | 35   | 87150000 | 0.90687  | 1.13E-32    |
| chr2 | 87150001 | 87250000 | 9    | 12   | 87200000 | -0.48741 | 5.63E-12    |
| chr2 | 87200001 | 87300000 | 7    | 14   | 87250000 | -1.07237 | 8.26E-44    |

|      |          |          |      |      |          |          |             |
|------|----------|----------|------|------|----------|----------|-------------|
| chr2 | 87250001 | 87350000 | 25   | 42   | 87300000 | -0.82083 | 1.71E-28    |
| chr2 | 87300001 | 87400000 | 39   | 55   | 87350000 | -0.56833 | 1.96E-15    |
| chr2 | 87350001 | 87450000 | 34   | 39   | 87400000 | -0.27031 | 6.69E-05    |
| chr2 | 87400001 | 87500000 | 30   | 33   | 87450000 | -0.20988 | 0.001477547 |
| chr2 | 87450001 | 87550000 | 35   | 38   | 87500000 | -0.19102 | 0.003395995 |
| chr2 | 87500001 | 87600000 | 40   | 53   | 87550000 | -0.47836 | 1.29E-11    |
| chr2 | 87550001 | 87650000 | 108  | 130  | 87600000 | -0.33985 | 8.57E-07    |
| chr2 | 87600001 | 87700000 | 93   | 105  | 87650000 | -0.24746 | 0.000232804 |
| chr2 | 87650001 | 87750000 | 14   | 17   | 87700000 | -0.35248 | 3.55E-07    |
| chr2 | 87700001 | 87800000 | 27   | 22   | 87750000 | 0.223084 | 0.00082794  |
| chr2 | 87750001 | 87850000 | 30   | 19   | 87800000 | 0.586591 | 5.41E-16    |
| chr2 | 87800001 | 87900000 | 24   | 12   | 87850000 | 0.927628 | 7.06E-34    |
| chr2 | 87850001 | 87950000 | 20   | 16   | 87900000 | 0.249556 | 0.000220671 |
| chr2 | 87900001 | 88000000 | 17   | 19   | 87950000 | -0.23284 | 0.000492315 |
| chr2 | 87950001 | 88050000 | 20   | 15   | 8.80E+07 | 0.342666 | 8.12E-07    |
| chr2 | 88000001 | 88100000 | 11   | 7    | 88050000 | 0.579705 | 1.10E-15    |
| chr2 | 88050001 | 88150000 | 12   | 17   | 88100000 | -0.57487 | 9.89E-16    |
| chr2 | 88100001 | 88200000 | 22   | 37   | 88150000 | -0.82239 | 1.40E-28    |
| chr2 | 88150001 | 88250000 | 20   | 30   | 88200000 | -0.65733 | 1.11E-19    |
| chr2 | 88200001 | 88300000 | 52   | 60   | 88250000 | -0.27882 | 4.11E-05    |
| chr2 | 89150001 | 89250000 | 915  | 944  | 89200000 | -0.11739 | 0.047837862 |
| chr2 | 89200001 | 89300000 | 643  | 701  | 89250000 | -0.19697 | 0.002629625 |
| chr2 | 89300001 | 89400000 | 100  | 85   | 89350000 | 0.162093 | 0.01094313  |
| chr2 | 89500001 | 89600000 | 39   | 34   | 89550000 | 0.125568 | 0.037685231 |
| chr2 | 89550001 | 89650000 | 9    | 15   | 89600000 | -0.80934 | 7.76E-28    |
| chr2 | 89600001 | 89700000 | 2    | 6    | 89650000 | -1.65733 | 2.87E-81    |
| chr2 | 89750001 | 89850000 | 446  | 492  | 89800000 | -0.21399 | 0.001222053 |
| chr2 | 89800001 | 89900000 | 2123 | 2489 | 89850000 | -0.30183 | 1.03E-05    |
| chr2 | 89850001 | 89950000 | 1686 | 2004 | 89900000 | -0.32165 | 2.91E-06    |
| chr2 | 89950001 | 90050000 | 58   | 63   | 9.00E+07 | -0.19167 | 0.003302837 |
| chr2 | 90000001 | 90100000 | 89   | 74   | 90050000 | 0.193908 | 0.003086654 |
| chr2 | 90100001 | 90200000 | 213  | 240  | 90150000 | -0.24455 | 0.000270984 |
| chr2 | 90150001 | 90250000 | 222  | 177  | 90200000 | 0.254439 | 0.000170636 |
| chr2 | 90200001 | 90300000 | 240  | 182  | 90250000 | 0.326724 | 2.35E-06    |
| chr2 | 90250001 | 90350000 | 31   | 23   | 90300000 | 0.358263 | 2.76E-07    |
| chr2 | 90300001 | 90400000 | 26   | 30   | 90350000 | -0.27882 | 4.11E-05    |
| chr2 | 90350001 | 90450000 | 57   | 73   | 90400000 | -0.42931 | 9.39E-10    |
| chr2 | 90400001 | 90500000 | 152  | 184  | 90450000 | -0.34801 | 4.86E-07    |
| chr2 | 90450001 | 90550000 | 121  | 141  | 90500000 | -0.29306 | 1.77E-05    |
| chr2 | 91500001 | 91600000 | 5    | 7    | 91550000 | -0.5578  | 5.82E-15    |
| chr2 | 91550001 | 91650000 | 24   | 46   | 91600000 | -1.01097 | 6.19E-40    |
| chr2 | 91600001 | 91700000 | 86   | 150  | 91650000 | -0.87493 | 1.22E-31    |
| chr2 | 91650001 | 91750000 | 94   | 146  | 91700000 | -0.70761 | 2.91E-22    |
| chr2 | 91900001 | 92000000 | 263  | 300  | 91950000 | -0.26227 | 0.000104866 |
| chr2 | 91950001 | 92050000 | 127  | 158  | 9.20E+07 | -0.38747 | 2.68E-08    |
| chr2 | 92100001 | 92200000 | 136  | 115  | 92150000 | 0.169601 | 0.008247847 |
| chr2 | 92150001 | 92250000 | 86   | 68   | 92200000 | 0.26643  | 8.92E-05    |

|      |          |          |      |      |           |          |             |
|------|----------|----------|------|------|-----------|----------|-------------|
| chr2 | 95250001 | 95350000 | 24   | 11   | 95300000  | 1.053159 | 2.42E-41    |
| chr2 | 95350001 | 95450000 | 249  | 281  | 95400000  | -0.2468  | 0.000241035 |
| chr2 | 95400001 | 95500000 | 285  | 299  | 95450000  | -0.14156 | 0.022300328 |
| chr2 | 95600001 | 95700000 | 994  | 1053 | 95650000  | -0.15556 | 0.01367645  |
| chr2 | 95650001 | 95750000 | 1113 | 1157 | 95700000  | -0.12831 | 0.034312988 |
| chr2 | 95900001 | 96000000 | 931  | 1139 | 95950000  | -0.36329 | 1.63E-07    |
| chr2 | 95950001 | 96050000 | 1058 | 1282 | 9.60E+07  | -0.34943 | 4.40E-07    |
| chr2 | 96000001 | 96100000 | 752  | 847  | 96050000  | -0.244   | 0.000278863 |
| chr2 | 96050001 | 96150000 | 220  | 261  | 96100000  | -0.31892 | 3.48E-06    |
| chr2 | 96200001 | 96300000 | 392  | 339  | 96250000  | 0.137197 | 0.026062559 |
| chr2 | 96300001 | 96400000 | 359  | 390  | 96350000  | -0.19186 | 0.003276037 |
| chr2 | 96350001 | 96450000 | 364  | 408  | 96400000  | -0.237   | 0.000399265 |
| chr2 | 96400001 | 96500000 | 195  | 227  | 96450000  | -0.29159 | 1.93E-05    |
| chr2 | 96500001 | 96600000 | 140  | 112  | 96550000  | 0.249556 | 0.000220671 |
| chr2 | 96550001 | 96650000 | 129  | 98   | 96600000  | 0.324146 | 2.78E-06    |
| chr2 | 96700001 | 96800000 | 710  | 806  | 96750000  | -0.25533 | 0.000153104 |
| chr2 | 96750001 | 96850000 | 1029 | 1166 | 96800000  | -0.2527  | 0.00017638  |
| chr2 | 97000001 | 97100000 | 838  | 892  | 97050000  | -0.16247 | 0.010610522 |
| chr2 | 97050001 | 97150000 | 755  | 816  | 97100000  | -0.18446 | 0.004467652 |
| chr2 | 97100001 | 97200000 | 866  | 942  | 97150000  | -0.19373 | 0.0030243   |
| chr2 | 97150001 | 97250000 | 998  | 1134 | 97200000  | -0.25668 | 0.000142347 |
| chr2 | 97200001 | 97300000 | 982  | 1013 | 97250000  | -0.11721 | 0.048086472 |
| chr2 | 97500001 | 97600000 | 997  | 1092 | 97550000  | -0.20368 | 0.001955826 |
| chr2 | 97550001 | 97650000 | 967  | 1092 | 97600000  | -0.24776 | 0.000229183 |
| chr2 | 97600001 | 97700000 | 720  | 801  | 97650000  | -0.22618 | 0.000683728 |
| chr2 | 97650001 | 97750000 | 312  | 354  | 97700000  | -0.25458 | 0.000159479 |
| chr2 | 97750001 | 97850000 | 150  | 128  | 97800000  | 0.156447 | 0.013449326 |
| chr2 | 97800001 | 97900000 | 154  | 103  | 97850000  | 0.507914 | 1.25E-12    |
| chr2 | 97850001 | 97950000 | 69   | 40   | 97900000  | 0.714225 | 3.85E-22    |
| chr2 | 97900001 | 98000000 | 5    | 4    | 97950000  | 0.249556 | 0.000220671 |
| chr2 | 98050001 | 98150000 | 14   | 5    | 98100000  | 1.413055 | 1.74E-63    |
| chr2 | 98150001 | 98250000 | 78   | 83   | 98200000  | -0.16201 | 0.01079277  |
| chr2 | 99000001 | 99100000 | 998  | 1045 | 99050000  | -0.13876 | 0.024482887 |
| chr2 | 99050001 | 99150000 | 1036 | 1078 | 99100000  | -0.1297  | 0.032835067 |
| chr2 | 99100001 | 99200000 | 1098 | 1134 | 99150000  | -0.11891 | 0.045721775 |
| chr2 | 99150001 | 99250000 | 1050 | 1094 | 99200000  | -0.1316  | 0.030920656 |
| chr2 | 99550001 | 99650000 | 760  | 786  | 99600000  | -0.1209  | 0.043082237 |
| chr2 | 99600001 | 99700000 | 741  | 765  | 99650000  | -0.11836 | 0.046483656 |
| chr2 | 99850001 | 99950000 | 864  | 709  | 99900000  | 0.212874 | 0.001334541 |
| chr2 | 1E+08    | 1E+08    | 985  | 857  | 100150000 | 0.128457 | 0.034460369 |
| chr2 | 1E+08    | 1.01E+08 | 1122 | 981  | 100450000 | 0.121376 | 0.042799689 |
| chr2 | 1.01E+08 | 1.01E+08 | 1121 | 978  | 101400000 | 0.124508 | 0.038928108 |
| chr2 | 1.01E+08 | 1.02E+08 | 1073 | 1121 | 101500000 | -0.13551 | 0.027251224 |
| chr2 | 1.02E+08 | 1.02E+08 | 1017 | 1079 | 101550000 | -0.15775 | 0.012631371 |
| chr2 | 1.02E+08 | 1.02E+08 | 997  | 1051 | 101600000 | -0.14847 | 0.017593573 |
| chr2 | 1.02E+08 | 1.02E+08 | 913  | 942  | 102050000 | -0.11748 | 0.047701068 |
| chr2 | 1.04E+08 | 1.04E+08 | 976  | 855  | 104050000 | 0.118585 | 0.046507211 |

|      |          |          |      |      |           |          |             |
|------|----------|----------|------|------|-----------|----------|-------------|
| chr2 | 1.04E+08 | 1.04E+08 | 989  | 864  | 104200000 | 0.122567 | 0.041291573 |
| chr2 | 1.04E+08 | 1.04E+08 | 1083 | 928  | 104250000 | 0.150465 | 0.016632729 |
| chr2 | 1.04E+08 | 1.04E+08 | 1062 | 871  | 104300000 | 0.213667 | 0.001286775 |
| chr2 | 1.04E+08 | 1.04E+08 | 1046 | 892  | 104350000 | 0.157395 | 0.01299642  |
| chr2 | 1.05E+08 | 1.05E+08 | 1071 | 927  | 104750000 | 0.135945 | 0.027147562 |
| chr2 | 1.05E+08 | 1.06E+08 | 1028 | 1069 | 105450000 | -0.12879 | 0.033792737 |
| chr2 | 1.05E+08 | 1.06E+08 | 1043 | 1096 | 105500000 | -0.14388 | 0.020610725 |
| chr2 | 1.06E+08 | 1.06E+08 | 934  | 979  | 105800000 | -0.14026 | 0.023292931 |
| chr2 | 1.06E+08 | 1.06E+08 | 913  | 961  | 105850000 | -0.14629 | 0.018973475 |
| chr2 | 1.06E+08 | 1.06E+08 | 1018 | 1092 | 106200000 | -0.17361 | 0.00692064  |
| chr2 | 1.06E+08 | 1.06E+08 | 983  | 1072 | 106250000 | -0.19741 | 0.002579059 |
| chr2 | 1.06E+08 | 1.06E+08 | 1013 | 1046 | 106300000 | -0.11862 | 0.046122976 |
| chr2 | 1.06E+08 | 1.07E+08 | 1007 | 1052 | 106500000 | -0.13544 | 0.027309228 |
| chr2 | 1.07E+08 | 1.07E+08 | 37   | 31   | 107050000 | 0.182885 | 0.004882095 |
| chr2 | 1.07E+08 | 1.07E+08 | 219  | 192  | 107100000 | 0.117453 | 0.048083151 |
| chr2 | 1.07E+08 | 1.07E+08 | 1035 | 1073 | 107200000 | -0.12439 | 0.038747    |
| chr2 | 1.07E+08 | 1.07E+08 | 996  | 1053 | 107350000 | -0.15266 | 0.01517657  |
| chr2 | 1.07E+08 | 1.08E+08 | 971  | 1039 | 107500000 | -0.17002 | 0.007959202 |
| chr2 | 1.08E+08 | 1.08E+08 | 921  | 953  | 107550000 | -0.12165 | 0.042124887 |
| chr2 | 1.08E+08 | 1.08E+08 | 1013 | 885  | 107900000 | 0.122513 | 0.041359464 |
| chr2 | 1.08E+08 | 1.08E+08 | 1082 | 917  | 1.08E+08  | 0.166335 | 0.009338661 |
| chr2 | 1.08E+08 | 1.08E+08 | 929  | 801  | 108400000 | 0.141505 | 0.022601154 |
| chr2 | 1.08E+08 | 1.09E+08 | 436  | 361  | 108450000 | 0.199958 | 0.002378483 |
| chr2 | 1.09E+08 | 1.09E+08 | 378  | 390  | 109300000 | -0.11746 | 0.047735293 |
| chr2 | 1.09E+08 | 1.09E+08 | 635  | 557  | 109400000 | 0.116707 | 0.049143789 |
| chr2 | 1.1E+08  | 1.1E+08  | 921  | 969  | 109750000 | -0.14567 | 0.01938725  |
| chr2 | 1.1E+08  | 1.1E+08  | 1075 | 1139 | 109800000 | -0.1558  | 0.013556578 |
| chr2 | 1.1E+08  | 1.1E+08  | 1086 | 1157 | 110050000 | -0.16374 | 0.010116815 |
| chr2 | 1.1E+08  | 1.1E+08  | 630  | 725  | 110100000 | -0.275   | 5.12E-05    |
| chr2 | 1.1E+08  | 1.1E+08  | 107  | 144  | 110150000 | -0.50083 | 1.60E-12    |
| chr2 | 1.1E+08  | 1.11E+08 | 405  | 343  | 110500000 | 0.167342 | 0.008989726 |
| chr2 | 1.11E+08 | 1.11E+08 | 5    | 4    | 110550000 | 0.249556 | 0.000220671 |
| chr2 | 1.11E+08 | 1.11E+08 | 4    | 5    | 110750000 | -0.3943  | 1.58E-08    |
| chr2 | 1.11E+08 | 1.11E+08 | 10   | 7    | 110800000 | 0.442201 | 4.22E-10    |
| chr2 | 1.11E+08 | 1.11E+08 | 284  | 310  | 1.11E+08  | -0.19875 | 0.00243281  |
| chr2 | 1.11E+08 | 1.11E+08 | 11   | 13   | 111050000 | -0.31338 | 4.97E-06    |
| chr2 | 1.11E+08 | 1.11E+08 | 9    | 11   | 111100000 | -0.36188 | 1.81E-07    |
| chr2 | 1.11E+08 | 1.11E+08 | 12   | 4    | 111150000 | 1.512591 | 1.57E-69    |
| chr2 | 1.11E+08 | 1.11E+08 | 7    | 2    | 111200000 | 1.734983 | 1.52E-82    |
| chr2 | 1.11E+08 | 1.11E+08 | 0    | 1    | 111300000 | #NAME?   | 1.59E-189   |
| chr2 | 1.11E+08 | 1.11E+08 | 557  | 587  | 111400000 | -0.14805 | 0.01784938  |
| chr2 | 1.11E+08 | 1.12E+08 | 1003 | 1063 | 111450000 | -0.15619 | 0.013366941 |
| chr2 | 1.12E+08 | 1.12E+08 | 1007 | 1056 | 111650000 | -0.14092 | 0.022783487 |
| chr2 | 1.12E+08 | 1.12E+08 | 155  | 134  | 112050000 | 0.137663 | 0.025667152 |
| chr2 | 1.12E+08 | 1.12E+08 | 36   | 22   | 112100000 | 0.638122 | 2.22E-18    |
| chr2 | 1.12E+08 | 1.12E+08 | 45   | 26   | 112150000 | 0.719042 | 2.18E-22    |
| chr2 | 1.12E+08 | 1.12E+08 | 36   | 28   | 112200000 | 0.290198 | 2.29E-05    |



|      |          |          |      |      |           |          |             |
|------|----------|----------|------|------|-----------|----------|-------------|
| chr2 | 1.13E+08 | 1.13E+08 | 56   | 46   | 112550000 | 0.211421 | 0.001426231 |
| chr2 | 1.13E+08 | 1.13E+08 | 144  | 169  | 112600000 | -0.30333 | 9.39E-06    |
| chr2 | 1.13E+08 | 1.13E+08 | 993  | 862  | 112750000 | 0.131734 | 0.031081279 |
| chr2 | 1.14E+08 | 1.14E+08 | 997  | 1088 | 113950000 | -0.19838 | 0.002471916 |
| chr2 | 1.14E+08 | 1.14E+08 | 1013 | 1156 | 1.14E+08  | -0.26288 | 0.000101407 |
| chr2 | 1.14E+08 | 1.14E+08 | 698  | 817  | 114050000 | -0.29948 | 1.19E-05    |
| chr2 | 1.14E+08 | 1.14E+08 | 435  | 479  | 114100000 | -0.21138 | 0.001378716 |
| chr2 | 1.14E+08 | 1.14E+08 | 39   | 34   | 114250000 | 0.125568 | 0.037685231 |
| chr2 | 1.14E+08 | 1.14E+08 | 67   | 79   | 114350000 | -0.31006 | 6.14E-06    |
| chr2 | 1.14E+08 | 1.14E+08 | 236  | 255  | 114400000 | -0.18408 | 0.004538617 |
| chr2 | 1.15E+08 | 1.15E+08 | 941  | 816  | 114600000 | 0.133254 | 0.029610388 |
| chr2 | 1.15E+08 | 1.15E+08 | 976  | 842  | 114650000 | 0.140689 | 0.023224762 |
| chr2 | 1.15E+08 | 1.15E+08 | 949  | 813  | 115100000 | 0.150781 | 0.016449551 |
| chr2 | 1.15E+08 | 1.15E+08 | 964  | 833  | 115150000 | 0.138345 | 0.025099034 |
| chr2 | 1.15E+08 | 1.15E+08 | 1034 | 904  | 115250000 | 0.12147  | 0.042679279 |
| chr2 | 1.16E+08 | 1.16E+08 | 1056 | 925  | 115850000 | 0.118713 | 0.046331912 |
| chr2 | 1.16E+08 | 1.16E+08 | 983  | 819  | 116100000 | 0.190956 | 0.003497176 |
| chr2 | 1.17E+08 | 1.17E+08 | 969  | 824  | 116550000 | 0.161481 | 0.011193847 |
| chr2 | 1.17E+08 | 1.17E+08 | 948  | 808  | 116900000 | 0.15816  | 0.012641066 |
| chr2 | 1.17E+08 | 1.17E+08 | 989  | 863  | 117300000 | 0.124238 | 0.039250085 |
| chr2 | 1.17E+08 | 1.17E+08 | 936  | 766  | 117350000 | 0.216792 | 0.001113514 |
| chr2 | 1.18E+08 | 1.18E+08 | 970  | 821  | 117600000 | 0.168231 | 0.008691039 |
| chr2 | 1.18E+08 | 1.18E+08 | 976  | 803  | 117650000 | 0.209109 | 0.001584103 |
| chr2 | 1.18E+08 | 1.18E+08 | 1001 | 863  | 117700000 | 0.141638 | 0.022500681 |
| chr2 | 1.18E+08 | 1.18E+08 | 884  | 918  | 118400000 | -0.12682 | 0.03594536  |
| chr2 | 1.19E+08 | 1.19E+08 | 799  | 887  | 118600000 | -0.22311 | 0.000793259 |
| chr2 | 1.19E+08 | 1.19E+08 | 747  | 814  | 118650000 | -0.19629 | 0.002707902 |
| chr2 | 1.19E+08 | 1.19E+08 | 857  | 909  | 118700000 | -0.15736 | 0.012812498 |
| chr2 | 1.19E+08 | 1.2E+08  | 1065 | 1136 | 119500000 | -0.16548 | 0.009472046 |
| chr2 | 1.2E+08  | 1.2E+08  | 981  | 1021 | 119650000 | -0.13003 | 0.032499467 |
| chr2 | 1.2E+08  | 1.2E+08  | 935  | 982  | 119700000 | -0.14313 | 0.021144876 |
| chr2 | 1.2E+08  | 1.2E+08  | 927  | 958  | 119750000 | -0.11983 | 0.04449241  |
| chr2 | 1.2E+08  | 1.2E+08  | 932  | 971  | 119800000 | -0.13151 | 0.031001809 |
| chr2 | 1.2E+08  | 1.2E+08  | 979  | 1018 | 119850000 | -0.12873 | 0.033861672 |
| chr2 | 1.2E+08  | 1.2E+08  | 1054 | 1087 | 119950000 | -0.11685 | 0.048601696 |
| chr2 | 1.2E+08  | 1.2E+08  | 1026 | 1087 | 120200000 | -0.15569 | 0.013610577 |
| chr2 | 1.2E+08  | 1.2E+08  | 1033 | 1085 | 120250000 | -0.14323 | 0.021074513 |
| chr2 | 1.21E+08 | 1.21E+08 | 1084 | 885  | 120650000 | 0.220244 | 0.000947266 |
| chr2 | 1.21E+08 | 1.21E+08 | 1044 | 897  | 120700000 | 0.14657  | 0.019036478 |
| chr2 | 1.21E+08 | 1.21E+08 | 996  | 1036 | 121050000 | -0.12918 | 0.033385746 |
| chr2 | 1.21E+08 | 1.21E+08 | 1102 | 1170 | 121100000 | -0.15876 | 0.012173094 |
| chr2 | 1.21E+08 | 1.21E+08 | 1092 | 1202 | 121200000 | -0.21084 | 0.001413822 |
| chr2 | 1.21E+08 | 1.21E+08 | 1104 | 1249 | 121250000 | -0.25041 | 0.000199271 |
| chr2 | 1.21E+08 | 1.21E+08 | 1110 | 1241 | 121300000 | -0.23332 | 0.00048068  |
| chr2 | 1.21E+08 | 1.21E+08 | 1109 | 1220 | 121350000 | -0.20999 | 0.001469562 |
| chr2 | 1.21E+08 | 1.21E+08 | 1093 | 1151 | 121400000 | -0.14697 | 0.018537188 |
| chr2 | 1.21E+08 | 1.22E+08 | 1075 | 1116 | 121500000 | -0.12637 | 0.036448649 |

|      |          |          |      |      |           |          |             |
|------|----------|----------|------|------|-----------|----------|-------------|
| chr2 | 1.22E+08 | 1.22E+08 | 1111 | 1194 | 121550000 | -0.17632 | 0.006216989 |
| chr2 | 1.22E+08 | 1.22E+08 | 1126 | 1195 | 121700000 | -0.15818 | 0.012434929 |
| chr2 | 1.22E+08 | 1.22E+08 | 1113 | 1213 | 121750000 | -0.1965  | 0.002683867 |
| chr2 | 1.22E+08 | 1.22E+08 | 1075 | 1164 | 121800000 | -0.18713 | 0.004000261 |
| chr2 | 1.22E+08 | 1.22E+08 | 1032 | 1147 | 121850000 | -0.22479 | 0.000731263 |
| chr2 | 1.22E+08 | 1.22E+08 | 991  | 1041 | 121900000 | -0.14338 | 0.020961411 |
| chr2 | 1.22E+08 | 1.22E+08 | 1026 | 1060 | 121950000 | -0.11941 | 0.045057878 |
| chr2 | 1.23E+08 | 1.23E+08 | 978  | 1025 | 122900000 | -0.14009 | 0.023424766 |
| chr2 | 1.23E+08 | 1.23E+08 | 1069 | 1128 | 122950000 | -0.14988 | 0.016747121 |
| chr2 | 1.23E+08 | 1.23E+08 | 982  | 1040 | 1.23E+08  | -0.15516 | 0.013874969 |
| chr2 | 1.24E+08 | 1.24E+08 | 1049 | 917  | 123850000 | 0.121649 | 0.042449763 |
| chr2 | 1.24E+08 | 1.24E+08 | 971  | 832  | 124150000 | 0.150516 | 0.01660293  |
| chr2 | 1.24E+08 | 1.24E+08 | 1016 | 875  | 124350000 | 0.143174 | 0.021368784 |
| chr2 | 1.24E+08 | 1.24E+08 | 976  | 834  | 124400000 | 0.154462 | 0.014441506 |
| chr2 | 1.24E+08 | 1.25E+08 | 1020 | 891  | 124450000 | 0.1227   | 0.041126447 |
| chr2 | 1.25E+08 | 1.25E+08 | 943  | 980  | 124950000 | -0.1279  | 0.034758114 |
| chr2 | 1.26E+08 | 1.26E+08 | 989  | 860  | 125900000 | 0.129262 | 0.033603145 |
| chr2 | 1.26E+08 | 1.26E+08 | 990  | 860  | 126100000 | 0.13072  | 0.03209604  |
| chr2 | 1.26E+08 | 1.26E+08 | 984  | 858  | 126200000 | 0.125309 | 0.037985686 |
| chr2 | 1.27E+08 | 1.27E+08 | 920  | 767  | 126600000 | 0.190036 | 0.003634922 |
| chr2 | 1.27E+08 | 1.27E+08 | 968  | 822  | 126650000 | 0.163497 | 0.010387464 |
| chr2 | 1.27E+08 | 1.27E+08 | 1061 | 930  | 127300000 | 0.11775  | 0.047664977 |
| chr2 | 1.27E+08 | 1.28E+08 | 970  | 1012 | 127450000 | -0.13352 | 0.029063173 |
| chr2 | 1.27E+08 | 1.28E+08 | 993  | 1082 | 127500000 | -0.19621 | 0.002717985 |
| chr2 | 1.28E+08 | 1.28E+08 | 1073 | 1139 | 127550000 | -0.15849 | 0.012292756 |
| chr2 | 1.28E+08 | 1.28E+08 | 960  | 994  | 127750000 | -0.12258 | 0.040946405 |
| chr2 | 1.28E+08 | 1.28E+08 | 1041 | 1227 | 127800000 | -0.30954 | 6.35E-06    |
| chr2 | 1.28E+08 | 1.28E+08 | 1044 | 1266 | 127850000 | -0.35053 | 4.07E-07    |
| chr2 | 1.28E+08 | 1.28E+08 | 1006 | 1046 | 127900000 | -0.12862 | 0.033972832 |
| chr2 | 1.28E+08 | 1.28E+08 | 1009 | 1042 | 128300000 | -0.1188  | 0.045876351 |
| chr2 | 1.28E+08 | 1.28E+08 | 998  | 1153 | 128350000 | -0.28065 | 3.69E-05    |
| chr2 | 1.28E+08 | 1.28E+08 | 1058 | 1200 | 128400000 | -0.25407 | 0.000163898 |
| chr2 | 1.28E+08 | 1.29E+08 | 1057 | 1091 | 128450000 | -0.11805 | 0.046913233 |
| chr2 | 1.29E+08 | 1.29E+08 | 941  | 810  | 128900000 | 0.143901 | 0.020849878 |
| chr2 | 1.29E+08 | 1.29E+08 | 894  | 927  | 1.29E+08  | -0.12467 | 0.038420817 |
| chr2 | 1.29E+08 | 1.29E+08 | 984  | 1074 | 129050000 | -0.19864 | 0.00244494  |
| chr2 | 1.29E+08 | 1.29E+08 | 1068 | 1140 | 129100000 | -0.16649 | 0.009114522 |
| chr2 | 1.29E+08 | 1.29E+08 | 1082 | 1138 | 129150000 | -0.14517 | 0.019720127 |
| chr2 | 1.3E+08  | 1.3E+08  | 969  | 1032 | 129950000 | -0.16325 | 0.010304815 |
| chr2 | 1.3E+08  | 1.31E+08 | 1052 | 1111 | 130500000 | -0.1511  | 0.016042769 |
| chr2 | 1.31E+08 | 1.31E+08 | 942  | 974  | 130650000 | -0.12057 | 0.043518569 |
| chr2 | 1.31E+08 | 1.31E+08 | 590  | 634  | 130700000 | -0.17614 | 0.006260734 |
| chr2 | 1.31E+08 | 1.31E+08 | 125  | 97   | 130800000 | 0.2935   | 1.88E-05    |
| chr2 | 1.31E+08 | 1.31E+08 | 33   | 44   | 130850000 | -0.48741 | 5.63E-12    |
| chr2 | 1.31E+08 | 1.31E+08 | 178  | 192  | 130900000 | -0.1816  | 0.005024487 |
| chr2 | 1.31E+08 | 1.31E+08 | 245  | 254  | 130950000 | -0.12442 | 0.038714376 |
| chr2 | 1.31E+08 | 1.31E+08 | 381  | 405  | 1.31E+08  | -0.1605  | 0.011413987 |

|      |          |          |      |      |           |          |             |
|------|----------|----------|------|------|-----------|----------|-------------|
| chr2 | 1.31E+08 | 1.31E+08 | 547  | 568  | 131150000 | -0.12672 | 0.036054757 |
| chr2 | 1.31E+08 | 1.31E+08 | 41   | 48   | 131200000 | -0.29978 | 1.17E-05    |
| chr2 | 1.31E+08 | 1.31E+08 | 15   | 10   | 131250000 | 0.512591 | 8.10E-13    |
| chr2 | 1.31E+08 | 1.31E+08 | 11   | 5    | 131300000 | 1.065132 | 4.55E-42    |
| chr2 | 1.31E+08 | 1.31E+08 | 15   | 16   | 131350000 | -0.16548 | 0.009472046 |
| chr2 | 1.31E+08 | 1.31E+08 | 11   | 16   | 131400000 | -0.61294 | 1.65E-17    |
| chr2 | 1.31E+08 | 1.32E+08 | 223  | 240  | 131450000 | -0.17836 | 0.005728217 |
| chr2 | 1.32E+08 | 1.32E+08 | 907  | 971  | 131600000 | -0.17074 | 0.007741209 |
| chr2 | 1.32E+08 | 1.32E+08 | 960  | 1017 | 131750000 | -0.15559 | 0.013663756 |
| chr2 | 1.32E+08 | 1.32E+08 | 999  | 1071 | 131800000 | -0.17277 | 0.007150878 |
| chr2 | 1.32E+08 | 1.32E+08 | 698  | 747  | 131900000 | -0.17025 | 0.007889003 |
| chr2 | 1.32E+08 | 1.32E+08 | 311  | 364  | 131950000 | -0.2994  | 1.20E-05    |
| chr2 | 1.32E+08 | 1.32E+08 | 71   | 78   | 1.32E+08  | -0.20803 | 0.001607627 |
| chr2 | 1.32E+08 | 1.32E+08 | 419  | 447  | 132200000 | -0.1657  | 0.009395071 |
| chr2 | 1.32E+08 | 1.32E+08 | 247  | 308  | 132250000 | -0.39079 | 2.08E-08    |
| chr2 | 1.32E+08 | 1.32E+08 | 442  | 468  | 132300000 | -0.15483 | 0.014039201 |
| chr2 | 1.32E+08 | 1.32E+08 | 270  | 327  | 132400000 | -0.3487  | 4.63E-07    |
| chr2 | 1.32E+08 | 1.33E+08 | 315  | 357  | 132450000 | -0.25294 | 0.000174062 |
| chr2 | 1.33E+08 | 1.33E+08 | 124  | 138  | 132600000 | -0.2267  | 0.000666514 |
| chr2 | 1.33E+08 | 1.33E+08 | 122  | 100  | 132700000 | 0.214509 | 0.001237806 |
| chr2 | 1.33E+08 | 1.33E+08 | 94   | 101  | 132850000 | -0.17599 | 0.006297016 |
| chr2 | 1.33E+08 | 1.33E+08 | 79   | 89   | 132900000 | -0.24432 | 0.000274219 |
| chr2 | 1.33E+08 | 1.33E+08 | 2277 | 2521 | 1.33E+08  | -0.21923 | 0.000954877 |
| chr2 | 1.33E+08 | 1.33E+08 | 2561 | 2798 | 133050000 | -0.20006 | 0.002296579 |
| chr2 | 1.33E+08 | 1.33E+08 | 942  | 974  | 133300000 | -0.12057 | 0.043518569 |
| chr2 | 1.34E+08 | 1.34E+08 | 911  | 970  | 134100000 | -0.16291 | 0.010437229 |
| chr2 | 1.34E+08 | 1.34E+08 | 990  | 1028 | 134150000 | -0.12671 | 0.036066265 |
| chr2 | 1.34E+08 | 1.35E+08 | 1007 | 1038 | 134450000 | -0.11611 | 0.049659902 |
| chr2 | 1.35E+08 | 1.35E+08 | 1044 | 1096 | 135250000 | -0.1425  | 0.021601794 |
| chr2 | 1.35E+08 | 1.35E+08 | 990  | 860  | 135400000 | 0.13072  | 0.03209604  |
| chr2 | 1.36E+08 | 1.36E+08 | 788  | 670  | 136150000 | 0.161663 | 0.011118797 |
| chr2 | 1.36E+08 | 1.36E+08 | 821  | 677  | 136200000 | 0.205855 | 0.001833528 |
| chr2 | 1.36E+08 | 1.36E+08 | 908  | 759  | 136250000 | 0.186221 | 0.004259206 |
| chr2 | 1.36E+08 | 1.36E+08 | 994  | 853  | 136300000 | 0.148328 | 0.017916857 |
| chr2 | 1.37E+08 | 1.37E+08 | 878  | 766  | 136650000 | 0.124505 | 0.038932103 |
| chr2 | 1.37E+08 | 1.37E+08 | 924  | 974  | 136800000 | -0.1484  | 0.017635573 |
| chr2 | 1.37E+08 | 1.37E+08 | 930  | 987  | 137200000 | -0.15819 | 0.012427839 |
| chr2 | 1.37E+08 | 1.37E+08 | 880  | 979  | 137400000 | -0.22618 | 0.000683728 |
| chr2 | 1.38E+08 | 1.38E+08 | 996  | 1036 | 137550000 | -0.12918 | 0.033385746 |
| chr2 | 1.38E+08 | 1.38E+08 | 928  | 787  | 138100000 | 0.165389 | 0.009677303 |
| chr2 | 1.38E+08 | 1.38E+08 | 968  | 825  | 138150000 | 0.158241 | 0.012603842 |
| chr2 | 1.38E+08 | 1.38E+08 | 884  | 773  | 138350000 | 0.121206 | 0.043018034 |
| chr2 | 1.38E+08 | 1.38E+08 | 994  | 834  | 138400000 | 0.180827 | 0.005306056 |
| chr2 | 1.38E+08 | 1.39E+08 | 976  | 836  | 138450000 | 0.151006 | 0.016319996 |
| chr2 | 1.39E+08 | 1.39E+08 | 886  | 777  | 138650000 | 0.11702  | 0.048696326 |
| chr2 | 1.4E+08  | 1.4E+08  | 954  | 1003 | 139550000 | -0.14463 | 0.020088203 |
| chr2 | 1.4E+08  | 1.4E+08  | 937  | 973  | 139650000 | -0.12676 | 0.03600919  |

|      |          |          |      |      |           |          |             |
|------|----------|----------|------|------|-----------|----------|-------------|
| chr2 | 1.4E+08  | 1.4E+08  | 1019 | 883  | 140200000 | 0.134297 | 0.028634698 |
| chr2 | 1.4E+08  | 1.4E+08  | 1002 | 851  | 140250000 | 0.16328  | 0.010471808 |
| chr2 | 1.4E+08  | 1.4E+08  | 1016 | 882  | 140300000 | 0.131678 | 0.031136626 |
| chr2 | 1.41E+08 | 1.41E+08 | 1044 | 855  | 141100000 | 0.215754 | 0.00116857  |
| chr2 | 1.41E+08 | 1.41E+08 | 946  | 805  | 141150000 | 0.16048  | 0.011614054 |
| chr2 | 1.41E+08 | 1.41E+08 | 1004 | 860  | 141300000 | 0.150979 | 0.016335751 |
| chr2 | 1.41E+08 | 1.41E+08 | 1055 | 876  | 141350000 | 0.195868 | 0.002838671 |
| chr2 | 1.41E+08 | 1.41E+08 | 1053 | 844  | 141400000 | 0.246819 | 0.000254437 |
| chr2 | 1.41E+08 | 1.42E+08 | 1031 | 886  | 141450000 | 0.146294 | 0.0192176   |
| chr2 | 1.42E+08 | 1.42E+08 | 1000 | 860  | 141550000 | 0.14522  | 0.019936409 |
| chr2 | 1.42E+08 | 1.42E+08 | 971  | 822  | 141600000 | 0.167961 | 0.008780671 |
| chr2 | 1.42E+08 | 1.42E+08 | 976  | 843  | 141700000 | 0.138977 | 0.024581732 |
| chr2 | 1.42E+08 | 1.42E+08 | 975  | 842  | 141750000 | 0.13921  | 0.024392879 |
| chr2 | 1.42E+08 | 1.42E+08 | 1072 | 935  | 142050000 | 0.124895 | 0.038470605 |
| chr2 | 1.42E+08 | 1.42E+08 | 1049 | 910  | 142100000 | 0.132704 | 0.030135245 |
| chr2 | 1.42E+08 | 1.42E+08 | 961  | 838  | 142250000 | 0.125214 | 0.0380959   |
| chr2 | 1.43E+08 | 1.43E+08 | 1068 | 934  | 142650000 | 0.121045 | 0.043225738 |
| chr2 | 1.43E+08 | 1.43E+08 | 1007 | 869  | 142750000 | 0.140264 | 0.023555748 |
| chr2 | 1.43E+08 | 1.43E+08 | 1125 | 895  | 142850000 | 0.257594 | 0.000144195 |
| chr2 | 1.43E+08 | 1.43E+08 | 1124 | 808  | 142900000 | 0.403843 | 9.35E-09    |
| chr2 | 1.43E+08 | 1.43E+08 | 1068 | 855  | 142950000 | 0.248544 | 0.000232641 |
| chr2 | 1.43E+08 | 1.43E+08 | 958  | 815  | 143400000 | 0.160854 | 0.011455378 |
| chr2 | 1.43E+08 | 1.44E+08 | 940  | 822  | 143450000 | 0.121151 | 0.043089767 |
| chr2 | 1.44E+08 | 1.44E+08 | 1006 | 860  | 143550000 | 0.15385  | 0.014759918 |
| chr2 | 1.44E+08 | 1.44E+08 | 1027 | 879  | 143600000 | 0.152129 | 0.015687758 |
| chr2 | 1.44E+08 | 1.44E+08 | 1043 | 881  | 144200000 | 0.171153 | 0.007769908 |
| chr2 | 1.44E+08 | 1.45E+08 | 1011 | 1059 | 144500000 | -0.13929 | 0.024056636 |
| chr2 | 1.45E+08 | 1.45E+08 | 1015 | 1052 | 145250000 | -0.12403 | 0.039182301 |
| chr2 | 1.45E+08 | 1.45E+08 | 1010 | 1053 | 145300000 | -0.13252 | 0.030016446 |
| chr2 | 1.46E+08 | 1.46E+08 | 1073 | 896  | 145950000 | 0.187708 | 0.004005242 |
| chr2 | 1.46E+08 | 1.46E+08 | 1110 | 915  | 1.46E+08  | 0.206344 | 0.001793847 |
| chr2 | 1.46E+08 | 1.46E+08 | 1139 | 998  | 146050000 | 0.118284 | 0.046921662 |
| chr2 | 1.46E+08 | 1.46E+08 | 1054 | 916  | 146350000 | 0.130084 | 0.032746944 |
| chr2 | 1.46E+08 | 1.46E+08 | 1068 | 847  | 146400000 | 0.262106 | 0.000113    |
| chr2 | 1.46E+08 | 1.47E+08 | 1027 | 871  | 146450000 | 0.16532  | 0.00970265  |
| chr2 | 1.47E+08 | 1.47E+08 | 1027 | 877  | 146700000 | 0.155416 | 0.013957179 |
| chr2 | 1.47E+08 | 1.47E+08 | 1038 | 856  | 146750000 | 0.205752 | 0.001841947 |
| chr2 | 1.47E+08 | 1.47E+08 | 1056 | 844  | 146800000 | 0.250923 | 0.000205429 |
| chr2 | 1.47E+08 | 1.47E+08 | 926  | 786  | 146850000 | 0.164111 | 0.010152135 |
| chr2 | 1.47E+08 | 1.47E+08 | 1030 | 871  | 1.47E+08  | 0.169528 | 0.00827097  |
| chr2 | 1.47E+08 | 1.47E+08 | 983  | 857  | 147050000 | 0.125524 | 0.037735226 |
| chr2 | 1.47E+08 | 1.47E+08 | 1013 | 854  | 147300000 | 0.173954 | 0.006969164 |
| chr2 | 1.47E+08 | 1.47E+08 | 1008 | 810  | 147350000 | 0.24313  | 0.000307614 |
| chr2 | 1.47E+08 | 1.47E+08 | 972  | 780  | 147400000 | 0.24511  | 0.000277895 |
| chr2 | 1.47E+08 | 1.48E+08 | 980  | 821  | 147450000 | 0.183028 | 0.004853907 |
| chr2 | 1.47E+08 | 1.48E+08 | 980  | 856  | 147500000 | 0.122799 | 0.041003349 |
| chr2 | 1.48E+08 | 1.48E+08 | 964  | 827  | 147950000 | 0.148774 | 0.017642168 |

|      |          |          |      |      |           |          |             |
|------|----------|----------|------|------|-----------|----------|-------------|
| chr2 | 1.49E+08 | 1.49E+08 | 1072 | 929  | 148850000 | 0.134183 | 0.028740286 |
| chr2 | 1.49E+08 | 1.5E+08  | 999  | 859  | 149450000 | 0.145455 | 0.019777169 |
| chr2 | 1.49E+08 | 1.5E+08  | 961  | 841  | 149500000 | 0.120059 | 0.044518224 |
| chr2 | 1.5E+08  | 1.5E+08  | 102  | 116  | 149750000 | -0.25793 | 0.000133034 |
| chr2 | 1.5E+08  | 1.5E+08  | 1094 | 952  | 149950000 | 0.128207 | 0.034729314 |
| chr2 | 1.5E+08  | 1.5E+08  | 968  | 1007 | 150250000 | -0.12936 | 0.033198445 |
| chr2 | 1.51E+08 | 1.51E+08 | 1038 | 883  | 150900000 | 0.160949 | 0.011415184 |
| chr2 | 1.51E+08 | 1.51E+08 | 1006 | 844  | 150950000 | 0.180944 | 0.005281121 |
| chr2 | 1.51E+08 | 1.51E+08 | 1032 | 886  | 151100000 | 0.147693 | 0.018314996 |
| chr2 | 1.52E+08 | 1.52E+08 | 1094 | 952  | 151600000 | 0.128207 | 0.034729314 |
| chr2 | 1.52E+08 | 1.52E+08 | 1012 | 866  | 151650000 | 0.152399 | 0.015539333 |
| chr2 | 1.53E+08 | 1.53E+08 | 959  | 821  | 152650000 | 0.151777 | 0.015883928 |
| chr2 | 1.53E+08 | 1.53E+08 | 1030 | 883  | 152700000 | 0.149787 | 0.017031135 |
| chr2 | 1.53E+08 | 1.54E+08 | 1070 | 918  | 153500000 | 0.148673 | 0.017704145 |
| chr2 | 1.54E+08 | 1.54E+08 | 1004 | 878  | 153550000 | 0.121095 | 0.043162044 |
| chr2 | 1.54E+08 | 1.54E+08 | 926  | 958  | 153650000 | -0.12139 | 0.042458987 |
| chr2 | 1.54E+08 | 1.54E+08 | 906  | 790  | 153900000 | 0.125287 | 0.038011642 |
| chr2 | 1.54E+08 | 1.54E+08 | 1041 | 899  | 153950000 | 0.139205 | 0.02439686  |
| chr2 | 1.55E+08 | 1.55E+08 | 993  | 855  | 154700000 | 0.143498 | 0.021136423 |
| chr2 | 1.55E+08 | 1.55E+08 | 1016 | 875  | 154950000 | 0.143174 | 0.021368784 |
| chr2 | 1.55E+08 | 1.55E+08 | 991  | 852  | 155100000 | 0.14566  | 0.019639155 |
| chr2 | 1.55E+08 | 1.55E+08 | 1069 | 848  | 155150000 | 0.261754 | 0.000115185 |
| chr2 | 1.55E+08 | 1.55E+08 | 1078 | 878  | 155200000 | 0.223693 | 0.000804256 |
| chr2 | 1.56E+08 | 1.56E+08 | 843  | 718  | 156300000 | 0.159177 | 0.012181453 |
| chr2 | 1.56E+08 | 1.56E+08 | 965  | 838  | 156400000 | 0.131207 | 0.031605458 |
| chr2 | 1.56E+08 | 1.57E+08 | 964  | 811  | 156450000 | 0.176959 | 0.006192186 |
| chr2 | 1.56E+08 | 1.57E+08 | 1022 | 879  | 156500000 | 0.145088 | 0.020025819 |
| chr2 | 1.57E+08 | 1.57E+08 | 1052 | 895  | 156550000 | 0.160803 | 0.011476673 |
| chr2 | 1.57E+08 | 1.57E+08 | 1000 | 825  | 156600000 | 0.205162 | 0.001891009 |
| chr2 | 1.57E+08 | 1.57E+08 | 1034 | 869  | 156650000 | 0.178436 | 0.005839333 |
| chr2 | 1.57E+08 | 1.57E+08 | 1020 | 887  | 156700000 | 0.129191 | 0.033677707 |
| chr2 | 1.57E+08 | 1.57E+08 | 973  | 842  | 156750000 | 0.136248 | 0.026881967 |
| chr2 | 1.57E+08 | 1.57E+08 | 1008 | 832  | 156800000 | 0.204468 | 0.001950247 |
| chr2 | 1.57E+08 | 1.57E+08 | 1039 | 884  | 157350000 | 0.160706 | 0.011518001 |
| chr2 | 1.57E+08 | 1.58E+08 | 1072 | 916  | 157450000 | 0.154514 | 0.014414914 |
| chr2 | 1.57E+08 | 1.58E+08 | 1083 | 893  | 157500000 | 0.205929 | 0.001827417 |
| chr2 | 1.58E+08 | 1.58E+08 | 1048 | 875  | 157550000 | 0.187912 | 0.003971425 |
| chr2 | 1.58E+08 | 1.58E+08 | 944  | 802  | 157600000 | 0.162813 | 0.01065514  |
| chr2 | 1.58E+08 | 1.58E+08 | 966  | 1013 | 158300000 | -0.14091 | 0.022788897 |
| chr2 | 1.59E+08 | 1.59E+08 | 822  | 688  | 159250000 | 0.184358 | 0.004597644 |
| chr2 | 1.59E+08 | 1.59E+08 | 924  | 797  | 159300000 | 0.140941 | 0.023030347 |
| chr2 | 1.6E+08  | 1.6E+08  | 1007 | 857  | 160300000 | 0.160325 | 0.011680266 |
| chr2 | 1.6E+08  | 1.6E+08  | 1021 | 892  | 160350000 | 0.122495 | 0.041381403 |
| chr2 | 1.6E+08  | 1.61E+08 | 918  | 789  | 160450000 | 0.146097 | 0.01934765  |
| chr2 | 1.6E+08  | 1.61E+08 | 949  | 789  | 160500000 | 0.194011 | 0.003073188 |
| chr2 | 1.61E+08 | 1.61E+08 | 948  | 763  | 160550000 | 0.240832 | 0.000345807 |
| chr2 | 1.61E+08 | 1.61E+08 | 969  | 803  | 160600000 | 0.198725 | 0.002509509 |

|      |          |          |      |     |           |          |             |
|------|----------|----------|------|-----|-----------|----------|-------------|
| chr2 | 1.62E+08 | 1.62E+08 | 795  | 820 | 161850000 | -0.11704 | 0.048328043 |
| chr2 | 1.62E+08 | 1.62E+08 | 954  | 999 | 162050000 | -0.13887 | 0.024398335 |
| chr2 | 1.62E+08 | 1.62E+08 | 1007 | 857 | 162200000 | 0.160325 | 0.011680266 |
| chr2 | 1.62E+08 | 1.62E+08 | 827  | 720 | 162400000 | 0.127519 | 0.035481556 |
| chr2 | 1.63E+08 | 1.63E+08 | 1052 | 872 | 162650000 | 0.198363 | 0.002549216 |
| chr2 | 1.63E+08 | 1.63E+08 | 983  | 822 | 162700000 | 0.185681 | 0.004354839 |
| chr2 | 1.63E+08 | 1.64E+08 | 1069 | 920 | 163500000 | 0.144184 | 0.020650699 |
| chr2 | 1.64E+08 | 1.64E+08 | 1020 | 854 | 163950000 | 0.183889 | 0.004686506 |
| chr2 | 1.64E+08 | 1.64E+08 | 1060 | 879 | 1.64E+08  | 0.197757 | 0.002616902 |
| chr2 | 1.64E+08 | 1.64E+08 | 1049 | 912 | 164050000 | 0.129537 | 0.033314402 |
| chr2 | 1.65E+08 | 1.65E+08 | 1024 | 855 | 1.65E+08  | 0.187848 | 0.003982055 |
| chr2 | 1.65E+08 | 1.65E+08 | 1042 | 901 | 165050000 | 0.137384 | 0.02590281  |
| chr2 | 1.65E+08 | 1.65E+08 | 949  | 830 | 165100000 | 0.120925 | 0.043381878 |
| chr2 | 1.65E+08 | 1.65E+08 | 901  | 764 | 165150000 | 0.165583 | 0.009607222 |
| chr2 | 1.65E+08 | 1.65E+08 | 1040 | 874 | 165200000 | 0.178507 | 0.005823006 |
| chr2 | 1.65E+08 | 1.65E+08 | 1095 | 958 | 165250000 | 0.120462 | 0.043986953 |
| chr2 | 1.65E+08 | 1.66E+08 | 1020 | 888 | 165450000 | 0.127566 | 0.035429645 |
| chr2 | 1.66E+08 | 1.66E+08 | 1054 | 882 | 165600000 | 0.184653 | 0.004542582 |
| chr2 | 1.66E+08 | 1.66E+08 | 1043 | 903 | 166200000 | 0.135569 | 0.027480906 |
| chr2 | 1.66E+08 | 1.66E+08 | 1019 | 856 | 166350000 | 0.1791   | 0.005686779 |
| chr2 | 1.67E+08 | 1.67E+08 | 1012 | 861 | 167050000 | 0.160752 | 0.011498209 |
| chr2 | 1.67E+08 | 1.67E+08 | 1017 | 811 | 167100000 | 0.254174 | 0.000173048 |
| chr2 | 1.67E+08 | 1.67E+08 | 1010 | 840 | 167150000 | 0.193522 | 0.003137736 |
| chr2 | 1.67E+08 | 1.67E+08 | 1015 | 886 | 167250000 | 0.123729 | 0.039862913 |
| chr2 | 1.68E+08 | 1.68E+08 | 879  | 906 | 167600000 | -0.11602 | 0.049797959 |
| chr2 | 1.68E+08 | 1.68E+08 | 1017 | 856 | 167700000 | 0.176265 | 0.006364511 |
| chr2 | 1.68E+08 | 1.68E+08 | 899  | 761 | 167750000 | 0.168053 | 0.008750076 |
| chr2 | 1.68E+08 | 1.68E+08 | 881  | 771 | 167800000 | 0.120039 | 0.044544045 |
| chr2 | 1.68E+08 | 1.68E+08 | 997  | 852 | 168350000 | 0.154368 | 0.014489861 |
| chr2 | 1.69E+08 | 1.69E+08 | 950  | 989 | 168900000 | -0.13041 | 0.032104976 |
| chr2 | 1.69E+08 | 1.69E+08 | 941  | 999 | 168950000 | -0.15866 | 0.012215321 |
| chr2 | 1.69E+08 | 1.69E+08 | 1102 | 938 | 169350000 | 0.160093 | 0.011780173 |
| chr2 | 1.71E+08 | 1.71E+08 | 948  | 812 | 170600000 | 0.151036 | 0.016303324 |
| chr2 | 1.71E+08 | 1.71E+08 | 910  | 739 | 170650000 | 0.22792  | 0.000656201 |
| chr2 | 1.71E+08 | 1.71E+08 | 937  | 760 | 170750000 | 0.229678 | 0.000602435 |
| chr2 | 1.71E+08 | 1.71E+08 | 963  | 777 | 170800000 | 0.237249 | 0.000414278 |
| chr2 | 1.71E+08 | 1.71E+08 | 975  | 824 | 170850000 | 0.170386 | 0.008003002 |
| chr2 | 1.71E+08 | 1.71E+08 | 1004 | 847 | 170900000 | 0.172954 | 0.007246467 |
| chr2 | 1.71E+08 | 1.71E+08 | 966  | 843 | 1.71E+08  | 0.124119 | 0.039393196 |
| chr2 | 1.71E+08 | 1.71E+08 | 1062 | 913 | 171050000 | 0.145725 | 0.019595332 |
| chr2 | 1.71E+08 | 1.71E+08 | 1036 | 906 | 171250000 | 0.121069 | 0.043194865 |
| chr2 | 1.71E+08 | 1.71E+08 | 972  | 824 | 171300000 | 0.16594  | 0.009478778 |
| chr2 | 1.72E+08 | 1.72E+08 | 926  | 964 | 171550000 | -0.13039 | 0.032127456 |
| chr2 | 1.72E+08 | 1.72E+08 | 941  | 819 | 171850000 | 0.12796  | 0.034998601 |
| chr2 | 1.72E+08 | 1.72E+08 | 980  | 827 | 171900000 | 0.172523 | 0.007368858 |
| chr2 | 1.72E+08 | 1.72E+08 | 1016 | 870 | 172050000 | 0.151441 | 0.016072584 |
| chr2 | 1.72E+08 | 1.72E+08 | 975  | 825 | 172150000 | 0.168636 | 0.008557728 |

|      |          |          |      |      |           |          |             |
|------|----------|----------|------|------|-----------|----------|-------------|
| chr2 | 1.72E+08 | 1.72E+08 | 850  | 703  | 172200000 | 0.201566 | 0.002216814 |
| chr2 | 1.73E+08 | 1.73E+08 | 923  | 805  | 172550000 | 0.12497  | 0.038382122 |
| chr2 | 1.73E+08 | 1.73E+08 | 897  | 770  | 172650000 | 0.147878 | 0.018198257 |
| chr2 | 1.73E+08 | 1.73E+08 | 950  | 812  | 172700000 | 0.154076 | 0.014641617 |
| chr2 | 1.74E+08 | 1.74E+08 | 941  | 795  | 174200000 | 0.170868 | 0.007855884 |
| chr2 | 1.74E+08 | 1.74E+08 | 1054 | 889  | 174250000 | 0.173248 | 0.007163968 |
| chr2 | 1.75E+08 | 1.75E+08 | 1052 | 915  | 1.75E+08  | 0.128919 | 0.033965857 |
| chr2 | 1.75E+08 | 1.75E+08 | 1064 | 877  | 175050000 | 0.206478 | 0.001783175 |
| chr2 | 1.75E+08 | 1.75E+08 | 1017 | 850  | 175100000 | 0.186413 | 0.004225531 |
| chr2 | 1.75E+08 | 1.75E+08 | 888  | 777  | 175250000 | 0.120273 | 0.044234652 |
| chr2 | 1.75E+08 | 1.76E+08 | 991  | 1042 | 175500000 | -0.14477 | 0.019993604 |
| chr2 | 1.76E+08 | 1.76E+08 | 925  | 996  | 175550000 | -0.17906 | 0.005568694 |
| chr2 | 1.76E+08 | 1.76E+08 | 1063 | 878  | 175700000 | 0.203477 | 0.00203784  |
| chr2 | 1.76E+08 | 1.76E+08 | 1014 | 875  | 176100000 | 0.140331 | 0.023503244 |
| chr2 | 1.77E+08 | 1.77E+08 | 926  | 787  | 176800000 | 0.162277 | 0.010869109 |
| chr2 | 1.77E+08 | 1.77E+08 | 971  | 851  | 177100000 | 0.11794  | 0.047399241 |
| chr2 | 1.78E+08 | 1.78E+08 | 1100 | 934  | 177650000 | 0.163637 | 0.01033325  |
| chr2 | 1.78E+08 | 1.78E+08 | 1115 | 964  | 177700000 | 0.137567 | 0.025748519 |
| chr2 | 1.78E+08 | 1.78E+08 | 969  | 1010 | 177850000 | -0.13216 | 0.030368381 |
| chr2 | 1.78E+08 | 1.78E+08 | 978  | 819  | 178350000 | 0.183599 | 0.004742293 |
| chr2 | 1.8E+08  | 1.8E+08  | 977  | 810  | 179550000 | 0.198065 | 0.00258233  |
| chr2 | 1.8E+08  | 1.8E+08  | 957  | 835  | 180250000 | 0.124371 | 0.039091459 |
| chr2 | 1.81E+08 | 1.81E+08 | 1150 | 956  | 180700000 | 0.19418  | 0.003051206 |
| chr2 | 1.81E+08 | 1.81E+08 | 1127 | 897  | 180750000 | 0.256936 | 0.000149368 |
| chr2 | 1.81E+08 | 1.81E+08 | 1020 | 870  | 180800000 | 0.15711  | 0.013131274 |
| chr2 | 1.81E+08 | 1.81E+08 | 1033 | 895  | 181200000 | 0.134509 | 0.028439761 |
| chr2 | 1.81E+08 | 1.81E+08 | 1021 | 842  | 181250000 | 0.205719 | 0.001844663 |
| chr2 | 1.81E+08 | 1.81E+08 | 1007 | 864  | 181400000 | 0.148589 | 0.017755959 |
| chr2 | 1.82E+08 | 1.82E+08 | 940  | 823  | 181650000 | 0.119397 | 0.045403306 |
| chr2 | 1.82E+08 | 1.82E+08 | 1051 | 879  | 182050000 | 0.185456 | 0.004395373 |
| chr2 | 1.82E+08 | 1.82E+08 | 1040 | 894  | 182200000 | 0.145865 | 0.019501906 |
| chr2 | 1.82E+08 | 1.83E+08 | 1097 | 941  | 182450000 | 0.148925 | 0.017549879 |
| chr2 | 1.83E+08 | 1.83E+08 | 1083 | 930  | 182700000 | 0.147359 | 0.018527018 |
| chr2 | 1.83E+08 | 1.83E+08 | 1063 | 932  | 182750000 | 0.117368 | 0.048202927 |
| chr2 | 1.83E+08 | 1.83E+08 | 921  | 785  | 183400000 | 0.158137 | 0.012651753 |
| chr2 | 1.83E+08 | 1.84E+08 | 970  | 838  | 183450000 | 0.138663 | 0.024837678 |
| chr2 | 1.85E+08 | 1.85E+08 | 928  | 778  | 185100000 | 0.181983 | 0.005064066 |
| chr2 | 1.85E+08 | 1.85E+08 | 1020 | 850  | 185150000 | 0.190663 | 0.003540577 |
| chr2 | 1.85E+08 | 1.85E+08 | 1119 | 908  | 185200000 | 0.229074 | 0.000620429 |
| chr2 | 1.85E+08 | 1.85E+08 | 1028 | 899  | 185300000 | 0.121075 | 0.04318685  |
| chr2 | 1.85E+08 | 1.85E+08 | 1097 | 907  | 185350000 | 0.202017 | 0.002173331 |
| chr2 | 1.85E+08 | 1.85E+08 | 1090 | 884  | 185400000 | 0.229838 | 0.000597742 |
| chr2 | 1.85E+08 | 1.86E+08 | 1114 | 885  | 185450000 | 0.259628 | 0.000129243 |
| chr2 | 1.85E+08 | 1.86E+08 | 1107 | 930  | 185500000 | 0.178981 | 0.005713829 |
| chr2 | 1.86E+08 | 1.86E+08 | 1060 | 909  | 185550000 | 0.14934  | 0.017298397 |
| chr2 | 1.86E+08 | 1.86E+08 | 1099 | 894  | 185700000 | 0.225473 | 0.000738503 |
| chr2 | 1.86E+08 | 1.86E+08 | 1100 | 910  | 185750000 | 0.201193 | 0.002253387 |

|      |          |          |      |     |           |          |             |
|------|----------|----------|------|-----|-----------|----------|-------------|
| chr2 | 1.86E+08 | 1.86E+08 | 965  | 829 | 185850000 | 0.146785 | 0.018896433 |
| chr2 | 1.86E+08 | 1.86E+08 | 1011 | 859 | 185900000 | 0.162681 | 0.010707349 |
| chr2 | 1.86E+08 | 1.86E+08 | 966  | 837 | 185950000 | 0.134424 | 0.028517894 |
| chr2 | 1.86E+08 | 1.86E+08 | 1011 | 844 | 1.86E+08  | 0.188096 | 0.003941148 |
| chr2 | 1.86E+08 | 1.86E+08 | 1033 | 892 | 186050000 | 0.139353 | 0.024278089 |
| chr2 | 1.86E+08 | 1.86E+08 | 1040 | 877 | 186150000 | 0.173563 | 0.007076479 |
| chr2 | 1.86E+08 | 1.86E+08 | 940  | 799 | 186200000 | 0.162093 | 0.01094313  |
| chr2 | 1.86E+08 | 1.86E+08 | 903  | 783 | 186250000 | 0.133342 | 0.029526919 |
| chr2 | 1.86E+08 | 1.86E+08 | 997  | 831 | 186350000 | 0.190373 | 0.003583834 |
| chr2 | 1.86E+08 | 1.86E+08 | 1002 | 767 | 186400000 | 0.313212 | 5.60E-06    |
| chr2 | 1.86E+08 | 1.87E+08 | 897  | 758 | 186450000 | 0.170538 | 0.007956267 |
| chr2 | 1.87E+08 | 1.87E+08 | 1024 | 886 | 186650000 | 0.136465 | 0.026692214 |
| chr2 | 1.87E+08 | 1.87E+08 | 914  | 774 | 186700000 | 0.167489 | 0.008939642 |
| chr2 | 1.87E+08 | 1.87E+08 | 1025 | 875 | 186950000 | 0.155897 | 0.013718004 |
| chr2 | 1.88E+08 | 1.88E+08 | 1071 | 936 | 187600000 | 0.122006 | 0.041996336 |
| chr2 | 1.88E+08 | 1.88E+08 | 983  | 848 | 187900000 | 0.140755 | 0.02317357  |
| chr2 | 1.88E+08 | 1.88E+08 | 999  | 841 | 188200000 | 0.176007 | 0.006429654 |
| chr2 | 1.88E+08 | 1.88E+08 | 1050 | 879 | 188250000 | 0.184082 | 0.004649711 |
| chr2 | 1.88E+08 | 1.88E+08 | 1085 | 906 | 188300000 | 0.18774  | 0.003999822 |
| chr2 | 1.88E+08 | 1.89E+08 | 936  | 805 | 188500000 | 0.145148 | 0.01998518  |
| chr2 | 1.89E+08 | 1.89E+08 | 957  | 789 | 188550000 | 0.206122 | 0.001811773 |
| chr2 | 1.89E+08 | 1.89E+08 | 1027 | 850 | 188600000 | 0.20053  | 0.002319802 |
| chr2 | 1.89E+08 | 1.89E+08 | 1037 | 856 | 188900000 | 0.204361 | 0.001959533 |
| chr2 | 1.89E+08 | 1.89E+08 | 957  | 837 | 188950000 | 0.12092  | 0.043388953 |
| chr2 | 1.89E+08 | 1.89E+08 | 942  | 811 | 189050000 | 0.143653 | 0.021025359 |
| chr2 | 1.89E+08 | 1.89E+08 | 1031 | 864 | 189100000 | 0.182569 | 0.004945129 |
| chr2 | 1.89E+08 | 1.89E+08 | 1029 | 877 | 189150000 | 0.158222 | 0.012612407 |
| chr2 | 1.89E+08 | 1.89E+08 | 1058 | 906 | 189200000 | 0.151385 | 0.016104501 |
| chr2 | 1.89E+08 | 1.89E+08 | 1103 | 960 | 189250000 | 0.127955 | 0.03500382  |
| chr2 | 1.89E+08 | 1.89E+08 | 1118 | 955 | 189300000 | 0.154976 | 0.014178803 |
| chr2 | 1.89E+08 | 1.89E+08 | 1125 | 940 | 189350000 | 0.186821 | 0.004155057 |
| chr2 | 1.89E+08 | 1.89E+08 | 1111 | 913 | 189400000 | 0.2108   | 0.001467153 |
| chr2 | 1.89E+08 | 1.9E+08  | 1093 | 893 | 189450000 | 0.21919  | 0.00099544  |
| chr2 | 1.89E+08 | 1.9E+08  | 1036 | 908 | 189500000 | 0.117888 | 0.047472308 |
| chr2 | 1.9E+08  | 1.9E+08  | 1027 | 796 | 189650000 | 0.295224 | 1.70E-05    |
| chr2 | 1.9E+08  | 1.9E+08  | 1033 | 842 | 189700000 | 0.222576 | 0.000848196 |
| chr2 | 1.9E+08  | 1.9E+08  | 1020 | 883 | 189750000 | 0.135712 | 0.027354123 |
| chr2 | 1.9E+08  | 1.9E+08  | 980  | 859 | 189900000 | 0.117752 | 0.04766276  |
| chr2 | 1.92E+08 | 1.92E+08 | 1016 | 824 | 191750000 | 0.229812 | 0.000598493 |
| chr2 | 1.92E+08 | 1.92E+08 | 970  | 769 | 191800000 | 0.262629 | 0.000109825 |
| chr2 | 1.92E+08 | 1.92E+08 | 1092 | 932 | 192250000 | 0.156199 | 0.013569822 |
| chr2 | 1.92E+08 | 1.92E+08 | 1014 | 874 | 192300000 | 0.141981 | 0.022243641 |
| chr2 | 1.93E+08 | 1.93E+08 | 1116 | 970 | 192750000 | 0.129909 | 0.032927795 |
| chr2 | 1.93E+08 | 1.93E+08 | 1103 | 889 | 192800000 | 0.238806 | 0.000383116 |
| chr2 | 1.93E+08 | 1.93E+08 | 1132 | 915 | 192850000 | 0.234659 | 0.000471438 |
| chr2 | 1.93E+08 | 1.93E+08 | 964  | 803 | 193150000 | 0.191261 | 0.003452564 |
| chr2 | 1.93E+08 | 1.93E+08 | 1029 | 855 | 193200000 | 0.194875 | 0.002962022 |



|      |          |          |      |     |           |          |             |
|------|----------|----------|------|-----|-----------|----------|-------------|
| chr2 | 1.93E+08 | 1.93E+08 | 1016 | 850 | 193250000 | 0.184994 | 0.004479496 |
| chr2 | 1.93E+08 | 1.93E+08 | 1024 | 890 | 193300000 | 0.129967 | 0.032867658 |
| chr2 | 1.93E+08 | 1.93E+08 | 934  | 801 | 193400000 | 0.149249 | 0.017353711 |
| chr2 | 1.93E+08 | 1.94E+08 | 1030 | 894 | 193450000 | 0.131926 | 0.030892407 |
| chr2 | 1.94E+08 | 1.94E+08 | 950  | 988 | 193550000 | -0.12896 | 0.033620948 |
| chr2 | 1.94E+08 | 1.94E+08 | 1081 | 933 | 193650000 | 0.140046 | 0.023726988 |
| chr2 | 1.94E+08 | 1.94E+08 | 1029 | 885 | 193700000 | 0.145122 | 0.020002978 |
| chr2 | 1.94E+08 | 1.94E+08 | 979  | 787 | 193900000 | 0.242573 | 0.000316486 |
| chr2 | 1.94E+08 | 1.94E+08 | 1092 | 926 | 193950000 | 0.165517 | 0.009630995 |
| chr2 | 1.94E+08 | 1.94E+08 | 997  | 861 | 194200000 | 0.139208 | 0.024394265 |
| chr2 | 1.94E+08 | 1.94E+08 | 1010 | 841 | 194300000 | 0.191806 | 0.003374254 |
| chr2 | 1.94E+08 | 1.94E+08 | 1017 | 824 | 194350000 | 0.231232 | 0.000558331 |
| chr2 | 1.94E+08 | 1.95E+08 | 959  | 833 | 194500000 | 0.130843 | 0.031972052 |
| chr2 | 1.95E+08 | 1.95E+08 | 876  | 753 | 194700000 | 0.145909 | 0.019472436 |
| chr2 | 1.95E+08 | 1.95E+08 | 1021 | 857 | 194750000 | 0.180244 | 0.005431886 |
| chr2 | 1.95E+08 | 1.95E+08 | 1026 | 848 | 194800000 | 0.202523 | 0.00212551  |
| chr2 | 1.95E+08 | 1.95E+08 | 1004 | 824 | 194850000 | 0.212671 | 0.001346999 |
| chr2 | 1.95E+08 | 1.95E+08 | 952  | 791 | 194900000 | 0.194912 | 0.002957314 |
| chr2 | 1.95E+08 | 1.95E+08 | 963  | 789 | 194950000 | 0.215139 | 0.001202328 |
| chr2 | 1.95E+08 | 1.95E+08 | 999  | 823 | 1.95E+08  | 0.20722  | 0.001724789 |
| chr2 | 1.95E+08 | 1.95E+08 | 1027 | 876 | 195050000 | 0.157062 | 0.013154282 |
| chr2 | 1.95E+08 | 1.95E+08 | 1080 | 908 | 195200000 | 0.177895 | 0.005966454 |
| chr2 | 1.95E+08 | 1.95E+08 | 1034 | 829 | 195250000 | 0.24642  | 0.000259735 |
| chr2 | 1.95E+08 | 1.95E+08 | 864  | 695 | 195300000 | 0.241647 | 0.000331792 |
| chr2 | 1.95E+08 | 1.95E+08 | 834  | 713 | 195350000 | 0.153774 | 0.014800106 |
| chr2 | 1.95E+08 | 1.96E+08 | 958  | 840 | 195450000 | 0.117265 | 0.048349274 |
| chr2 | 1.95E+08 | 1.96E+08 | 931  | 800 | 195500000 | 0.146409 | 0.019141692 |
| chr2 | 1.96E+08 | 1.96E+08 | 981  | 846 | 195550000 | 0.141224 | 0.022814339 |
| chr2 | 1.96E+08 | 1.96E+08 | 925  | 803 | 195800000 | 0.131682 | 0.031133128 |
| chr2 | 1.96E+08 | 1.96E+08 | 1022 | 851 | 195850000 | 0.191792 | 0.003376166 |
| chr2 | 1.96E+08 | 1.96E+08 | 1006 | 850 | 195900000 | 0.170724 | 0.007899678 |
| chr2 | 1.96E+08 | 1.96E+08 | 838  | 715 | 196100000 | 0.156635 | 0.013358339 |
| chr2 | 1.96E+08 | 1.96E+08 | 1017 | 876 | 196300000 | 0.142945 | 0.021534104 |
| chr2 | 1.96E+08 | 1.96E+08 | 955  | 828 | 196350000 | 0.133498 | 0.029379346 |
| chr2 | 1.97E+08 | 1.97E+08 | 1051 | 902 | 196700000 | 0.148192 | 0.018001885 |
| chr2 | 1.97E+08 | 1.97E+08 | 999  | 868 | 196750000 | 0.130418 | 0.032403759 |
| chr2 | 1.97E+08 | 1.97E+08 | 962  | 997 | 197150000 | -0.12393 | 0.039300511 |
| chr2 | 1.98E+08 | 1.98E+08 | 1007 | 853 | 197550000 | 0.167074 | 0.009081259 |
| chr2 | 1.98E+08 | 1.98E+08 | 948  | 783 | 197750000 | 0.203503 | 0.002035498 |
| chr2 | 1.99E+08 | 1.99E+08 | 947  | 982 | 198850000 | -0.12473 | 0.038345175 |
| chr2 | 1.99E+08 | 1.99E+08 | 1106 | 959 | 198950000 | 0.133377 | 0.029493831 |
| chr2 | 1.99E+08 | 1.99E+08 | 1100 | 877 | 199250000 | 0.254483 | 0.000170234 |
| chr2 | 1.99E+08 | 1.99E+08 | 1091 | 855 | 199300000 | 0.279283 | 4.33E-05    |
| chr2 | 1.99E+08 | 2E+08    | 993  | 833 | 199450000 | 0.181105 | 0.005246787 |
| chr2 | 1.99E+08 | 2E+08    | 1055 | 895 | 199500000 | 0.164912 | 0.009852441 |
| chr2 | 2E+08    | 2E+08    | 967  | 801 | 199900000 | 0.199342 | 0.002443129 |
| chr2 | 2E+08    | 2E+08    | 1019 | 891 | 200350000 | 0.121285 | 0.042916574 |

|      |          |          |      |      |           |          |             |
|------|----------|----------|------|------|-----------|----------|-------------|
| chr2 | 2.01E+08 | 2.01E+08 | 1023 | 1059 | 200900000 | -0.12227 | 0.041339819 |
| chr2 | 2.02E+08 | 2.02E+08 | 936  | 987  | 201550000 | -0.14891 | 0.017322598 |
| chr2 | 2.02E+08 | 2.02E+08 | 1000 | 1079 | 201600000 | -0.18207 | 0.004929885 |
| chr2 | 2.02E+08 | 2.02E+08 | 982  | 1022 | 201650000 | -0.12997 | 0.032558759 |
| chr2 | 2.02E+08 | 2.02E+08 | 952  | 770  | 201850000 | 0.233731 | 0.000493616 |
| chr2 | 2.02E+08 | 2.02E+08 | 844  | 690  | 201900000 | 0.218275 | 0.001039062 |
| chr2 | 2.02E+08 | 2.03E+08 | 817  | 866  | 202500000 | -0.1564  | 0.013265039 |
| chr2 | 2.03E+08 | 2.03E+08 | 1025 | 848  | 202600000 | 0.201116 | 0.002261037 |
| chr2 | 2.03E+08 | 2.03E+08 | 1034 | 860  | 202650000 | 0.193456 | 0.003146604 |
| chr2 | 2.03E+08 | 2.03E+08 | 803  | 703  | 203300000 | 0.119504 | 0.045259398 |
| chr2 | 2.03E+08 | 2.03E+08 | 742  | 639  | 203350000 | 0.143231 | 0.021327168 |
| chr2 | 2.04E+08 | 2.04E+08 | 974  | 796  | 203600000 | 0.218782 | 0.001014684 |
| chr2 | 2.04E+08 | 2.04E+08 | 987  | 795  | 203650000 | 0.239723 | 0.000365778 |
| chr2 | 2.04E+08 | 2.04E+08 | 862  | 739  | 203700000 | 0.149742 | 0.017058175 |
| chr2 | 2.04E+08 | 2.04E+08 | 921  | 799  | 203950000 | 0.132634 | 0.030203231 |
| chr2 | 2.04E+08 | 2.04E+08 | 888  | 748  | 2.04E+08  | 0.17515  | 0.006650344 |
| chr2 | 2.04E+08 | 2.04E+08 | 886  | 744  | 204050000 | 0.179632 | 0.005566828 |
| chr2 | 2.04E+08 | 2.04E+08 | 854  | 712  | 204100000 | 0.189987 | 0.003642305 |
| chr2 | 2.04E+08 | 2.04E+08 | 959  | 823  | 204250000 | 0.148267 | 0.017955186 |
| chr2 | 2.04E+08 | 2.04E+08 | 1037 | 847  | 204300000 | 0.21961  | 0.000975948 |
| chr2 | 2.04E+08 | 2.04E+08 | 966  | 820  | 204350000 | 0.164028 | 0.010183888 |
| chr2 | 2.04E+08 | 2.04E+08 | 900  | 782  | 204400000 | 0.130385 | 0.032437753 |
| chr2 | 2.04E+08 | 2.05E+08 | 924  | 796  | 204450000 | 0.142753 | 0.02167416  |
| chr2 | 2.05E+08 | 2.05E+08 | 1003 | 1040 | 204700000 | -0.12463 | 0.038459321 |
| chr2 | 2.05E+08 | 2.05E+08 | 1007 | 1041 | 204750000 | -0.12028 | 0.043896761 |
| chr2 | 2.05E+08 | 2.06E+08 | 1063 | 913  | 205500000 | 0.147083 | 0.018703801 |
| chr2 | 2.06E+08 | 2.06E+08 | 1100 | 959  | 205550000 | 0.125529 | 0.037729906 |
| chr2 | 2.06E+08 | 2.06E+08 | 1011 | 866  | 205650000 | 0.150972 | 0.016339555 |
| chr2 | 2.06E+08 | 2.06E+08 | 1016 | 880  | 205700000 | 0.134953 | 0.028034729 |
| chr2 | 2.06E+08 | 2.06E+08 | 1032 | 902  | 205850000 | 0.121872 | 0.042166587 |
| chr2 | 2.06E+08 | 2.06E+08 | 1013 | 886  | 2.06E+08  | 0.120884 | 0.043435369 |
| chr2 | 2.06E+08 | 2.06E+08 | 957  | 823  | 206050000 | 0.145255 | 0.019912595 |
| chr2 | 2.06E+08 | 2.06E+08 | 1010 | 858  | 206100000 | 0.162934 | 0.01060731  |
| chr2 | 2.06E+08 | 2.06E+08 | 1077 | 936  | 206150000 | 0.130066 | 0.032765044 |
| chr2 | 2.06E+08 | 2.06E+08 | 1033 | 905  | 206400000 | 0.118479 | 0.046653206 |
| chr2 | 2.06E+08 | 2.07E+08 | 1119 | 938  | 206450000 | 0.182178 | 0.005024125 |
| chr2 | 2.08E+08 | 2.08E+08 | 1065 | 930  | 207600000 | 0.123179 | 0.040534457 |
| chr2 | 2.08E+08 | 2.08E+08 | 1006 | 861  | 208250000 | 0.152173 | 0.015663391 |
| chr2 | 2.08E+08 | 2.08E+08 | 1035 | 890  | 208300000 | 0.145382 | 0.019826509 |
| chr2 | 2.09E+08 | 2.09E+08 | 787  | 817  | 208550000 | -0.12634 | 0.036480251 |
| chr2 | 2.09E+08 | 2.09E+08 | 927  | 956  | 209250000 | -0.11681 | 0.048652856 |
| chr2 | 2.1E+08  | 2.1E+08  | 931  | 788  | 209800000 | 0.168214 | 0.008696662 |
| chr2 | 2.1E+08  | 2.1E+08  | 896  | 764  | 210200000 | 0.157554 | 0.012921877 |
| chr2 | 2.1E+08  | 2.11E+08 | 1023 | 870  | 210450000 | 0.161347 | 0.01124911  |
| chr2 | 2.1E+08  | 2.11E+08 | 1002 | 876  | 210500000 | 0.121508 | 0.042630326 |
| chr2 | 2.11E+08 | 2.11E+08 | 937  | 989  | 210600000 | -0.15029 | 0.016503656 |
| chr2 | 2.11E+08 | 2.11E+08 | 976  | 855  | 210700000 | 0.118585 | 0.046507211 |

|      |          |          |      |      |           |          |             |
|------|----------|----------|------|------|-----------|----------|-------------|
| chr2 | 2.11E+08 | 2.11E+08 | 1005 | 880  | 210850000 | 0.119248 | 0.045603361 |
| chr2 | 2.11E+08 | 2.11E+08 | 962  | 843  | 210900000 | 0.118132 | 0.047131961 |
| chr2 | 2.11E+08 | 2.11E+08 | 931  | 810  | 2.11E+08  | 0.128487 | 0.034427321 |
| chr2 | 2.11E+08 | 2.11E+08 | 966  | 840  | 211050000 | 0.129262 | 0.033603145 |
| chr2 | 2.12E+08 | 2.12E+08 | 913  | 793  | 211850000 | 0.130922 | 0.031891594 |
| chr2 | 2.12E+08 | 2.12E+08 | 1002 | 866  | 211900000 | 0.138072 | 0.025325414 |
| chr2 | 2.12E+08 | 2.12E+08 | 1039 | 911  | 211950000 | 0.117301 | 0.048297766 |
| chr2 | 2.12E+08 | 2.12E+08 | 1021 | 883  | 2.12E+08  | 0.137126 | 0.02612302  |
| chr2 | 2.12E+08 | 2.12E+08 | 970  | 768  | 212050000 | 0.264507 | 9.91E-05    |
| chr2 | 2.12E+08 | 2.12E+08 | 922  | 768  | 212100000 | 0.191289 | 0.003448602 |
| chr2 | 2.12E+08 | 2.13E+08 | 993  | 855  | 212450000 | 0.143498 | 0.021136423 |
| chr2 | 2.13E+08 | 2.13E+08 | 1017 | 867  | 212550000 | 0.157844 | 0.0127869   |
| chr2 | 2.13E+08 | 2.13E+08 | 997  | 864  | 212850000 | 0.13419  | 0.028733081 |
| chr2 | 2.13E+08 | 2.13E+08 | 990  | 865  | 213100000 | 0.122357 | 0.0415552   |
| chr2 | 2.13E+08 | 2.13E+08 | 1091 | 916  | 213200000 | 0.17986  | 0.00551629  |
| chr2 | 2.13E+08 | 2.13E+08 | 1100 | 911  | 213250000 | 0.199609 | 0.002414908 |
| chr2 | 2.13E+08 | 2.14E+08 | 1011 | 887  | 213450000 | 0.116405 | 0.049579273 |
| chr2 | 2.13E+08 | 2.14E+08 | 1030 | 866  | 213500000 | 0.177834 | 0.005981108 |
| chr2 | 2.14E+08 | 2.14E+08 | 978  | 834  | 213750000 | 0.157415 | 0.012987087 |
| chr2 | 2.14E+08 | 2.14E+08 | 1068 | 859  | 213900000 | 0.24181  | 0.000329047 |
| chr2 | 2.14E+08 | 2.14E+08 | 1128 | 901  | 213950000 | 0.251796 | 0.000196215 |
| chr2 | 2.14E+08 | 2.14E+08 | 1085 | 929  | 2.14E+08  | 0.151573 | 0.015998442 |
| chr2 | 2.14E+08 | 2.14E+08 | 904  | 759  | 214250000 | 0.179851 | 0.005518217 |
| chr2 | 2.14E+08 | 2.14E+08 | 977  | 800  | 214400000 | 0.215987 | 0.001155998 |
| chr2 | 2.14E+08 | 2.15E+08 | 987  | 795  | 214450000 | 0.239723 | 0.000365778 |
| chr2 | 2.14E+08 | 2.15E+08 | 1013 | 866  | 214500000 | 0.153823 | 0.014773839 |
| chr2 | 2.15E+08 | 2.15E+08 | 1011 | 862  | 214550000 | 0.157651 | 0.012876484 |
| chr2 | 2.15E+08 | 2.15E+08 | 1010 | 871  | 214600000 | 0.141239 | 0.022802762 |
| chr2 | 2.15E+08 | 2.15E+08 | 1030 | 884  | 214650000 | 0.148154 | 0.018025113 |
| chr2 | 2.15E+08 | 2.15E+08 | 1092 | 869  | 214700000 | 0.257173 | 0.000147483 |
| chr2 | 2.15E+08 | 2.15E+08 | 1043 | 835  | 214750000 | 0.248519 | 0.000232935 |
| chr2 | 2.15E+08 | 2.15E+08 | 1039 | 858  | 214800000 | 0.203774 | 0.002011201 |
| chr2 | 2.15E+08 | 2.15E+08 | 1017 | 889  | 2.15E+08  | 0.121693 | 0.042394537 |
| chr2 | 2.15E+08 | 2.15E+08 | 1097 | 860  | 215050000 | 0.278783 | 4.45E-05    |
| chr2 | 2.15E+08 | 2.15E+08 | 1013 | 807  | 215100000 | 0.255622 | 0.000160227 |
| chr2 | 2.15E+08 | 2.15E+08 | 1028 | 900  | 215250000 | 0.119472 | 0.045302328 |
| chr2 | 2.15E+08 | 2.15E+08 | 1033 | 879  | 215300000 | 0.160533 | 0.01159113  |
| chr2 | 2.16E+08 | 2.16E+08 | 948  | 830  | 215550000 | 0.119404 | 0.045393344 |
| chr2 | 2.16E+08 | 2.16E+08 | 970  | 845  | 215600000 | 0.126662 | 0.036436126 |
| chr2 | 2.16E+08 | 2.16E+08 | 1067 | 896  | 216400000 | 0.179618 | 0.005570072 |
| chr2 | 2.17E+08 | 2.17E+08 | 925  | 967  | 217300000 | -0.13643 | 0.026437966 |
| chr2 | 2.17E+08 | 2.18E+08 | 1001 | 1108 | 217450000 | -0.21889 | 0.000970681 |
| chr2 | 2.17E+08 | 2.18E+08 | 978  | 1081 | 217500000 | -0.21683 | 0.001069676 |
| chr2 | 2.18E+08 | 2.18E+08 | 1020 | 1090 | 217550000 | -0.16813 | 0.008561719 |
| chr2 | 2.18E+08 | 2.18E+08 | 1013 | 1053 | 217600000 | -0.12824 | 0.034381953 |
| chr2 | 2.18E+08 | 2.18E+08 | 987  | 1027 | 218400000 | -0.12969 | 0.032854779 |
| chr2 | 2.18E+08 | 2.19E+08 | 1077 | 1164 | 218450000 | -0.18444 | 0.004471286 |

|      |          |          |      |      |           |          |             |
|------|----------|----------|------|------|-----------|----------|-------------|
| chr2 | 2.18E+08 | 2.19E+08 | 1082 | 1118 | 218500000 | -0.11959 | 0.044808188 |
| chr2 | 2.19E+08 | 2.19E+08 | 1052 | 1130 | 218650000 | -0.17556 | 0.006406677 |
| chr2 | 2.19E+08 | 2.19E+08 | 1144 | 1300 | 218700000 | -0.2568  | 0.000141458 |
| chr2 | 2.19E+08 | 2.19E+08 | 1172 | 1303 | 218750000 | -0.22524 | 0.000715745 |
| chr2 | 2.19E+08 | 2.19E+08 | 1191 | 1262 | 218800000 | -0.15591 | 0.013503972 |
| chr2 | 2.19E+08 | 2.19E+08 | 1230 | 1296 | 218850000 | -0.14778 | 0.018021501 |
| chr2 | 2.19E+08 | 2.19E+08 | 1129 | 1187 | 218900000 | -0.14465 | 0.02007857  |
| chr2 | 2.19E+08 | 2.19E+08 | 814  | 889  | 219200000 | -0.19953 | 0.002351201 |
| chr2 | 2.19E+08 | 2.19E+08 | 829  | 894  | 219250000 | -0.18127 | 0.005091729 |
| chr2 | 2.19E+08 | 2.19E+08 | 834  | 907  | 219300000 | -0.19343 | 0.003064116 |
| chr2 | 2.2E+08  | 2.2E+08  | 874  | 924  | 219650000 | -0.15263 | 0.015191837 |
| chr2 | 2.2E+08  | 2.2E+08  | 958  | 1056 | 219700000 | -0.21288 | 0.001286255 |
| chr2 | 2.2E+08  | 2.2E+08  | 948  | 1042 | 219750000 | -0.20877 | 0.001554258 |
| chr2 | 2.2E+08  | 2.2E+08  | 1098 | 1142 | 219900000 | -0.12906 | 0.033514098 |
| chr2 | 2.2E+08  | 2.2E+08  | 904  | 1003 | 220100000 | -0.2223  | 0.000824845 |
| chr2 | 2.2E+08  | 2.2E+08  | 982  | 1103 | 220150000 | -0.24001 | 0.000342572 |
| chr2 | 2.2E+08  | 2.2E+08  | 955  | 1042 | 220200000 | -0.19815 | 0.002496965 |
| chr2 | 2.2E+08  | 2.2E+08  | 971  | 1015 | 220250000 | -0.13631 | 0.026547376 |
| chr2 | 2.2E+08  | 2.2E+08  | 1147 | 1188 | 220300000 | -0.12304 | 0.040379833 |
| chr2 | 2.2E+08  | 2.2E+08  | 1167 | 1360 | 220350000 | -0.29317 | 1.75E-05    |
| chr2 | 2.2E+08  | 2.2E+08  | 1069 | 1386 | 220400000 | -0.44704 | 2.08E-10    |
| chr2 | 2.2E+08  | 2.21E+08 | 1047 | 1217 | 220450000 | -0.28944 | 2.20E-05    |
| chr2 | 2.21E+08 | 2.21E+08 | 954  | 988  | 220600000 | -0.12289 | 0.040561808 |
| chr2 | 2.21E+08 | 2.21E+08 | 1050 | 905  | 221150000 | 0.142028 | 0.022208488 |
| chr2 | 2.21E+08 | 2.21E+08 | 1041 | 859  | 221200000 | 0.204868 | 0.001915904 |
| chr2 | 2.22E+08 | 2.22E+08 | 971  | 807  | 222050000 | 0.194531 | 0.00300585  |
| chr2 | 2.22E+08 | 2.23E+08 | 991  | 1035 | 222450000 | -0.13505 | 0.027664945 |
| chr2 | 2.23E+08 | 2.23E+08 | 1100 | 922  | 222550000 | 0.182293 | 0.005000838 |
| chr2 | 2.23E+08 | 2.23E+08 | 956  | 1016 | 223100000 | -0.16019 | 0.011546925 |
| chr2 | 2.24E+08 | 2.24E+08 | 1060 | 892  | 224300000 | 0.176577 | 0.006286629 |
| chr2 | 2.24E+08 | 2.24E+08 | 1110 | 852  | 224350000 | 0.309263 | 7.18E-06    |
| chr2 | 2.24E+08 | 2.24E+08 | 1079 | 908  | 224400000 | 0.176559 | 0.006291101 |
| chr2 | 2.25E+08 | 2.25E+08 | 958  | 992  | 224850000 | -0.12269 | 0.040818404 |
| chr2 | 2.25E+08 | 2.25E+08 | 1025 | 1070 | 224900000 | -0.13436 | 0.02828923  |
| chr2 | 2.26E+08 | 2.26E+08 | 959  | 992  | 226100000 | -0.12118 | 0.042721219 |
| chr2 | 2.26E+08 | 2.26E+08 | 1056 | 885  | 226200000 | 0.182489 | 0.004961333 |
| chr2 | 2.26E+08 | 2.26E+08 | 1100 | 889  | 226250000 | 0.234876 | 0.000466362 |
| chr2 | 2.26E+08 | 2.27E+08 | 1008 | 878  | 226450000 | 0.126831 | 0.036245802 |
| chr2 | 2.27E+08 | 2.27E+08 | 1048 | 880  | 226600000 | 0.179692 | 0.005553637 |
| chr2 | 2.27E+08 | 2.27E+08 | 1034 | 862  | 226650000 | 0.190105 | 0.003624412 |
| chr2 | 2.27E+08 | 2.27E+08 | 1014 | 871  | 226700000 | 0.146941 | 0.018795257 |
| chr2 | 2.27E+08 | 2.27E+08 | 1041 | 899  | 226900000 | 0.139205 | 0.02439686  |
| chr2 | 2.27E+08 | 2.27E+08 | 1039 | 877  | 226950000 | 0.172175 | 0.007468876 |
| chr2 | 2.27E+08 | 2.27E+08 | 1044 | 909  | 227050000 | 0.127398 | 0.03561497  |
| chr2 | 2.27E+08 | 2.27E+08 | 1023 | 877  | 227100000 | 0.149786 | 0.017032084 |
| chr2 | 2.27E+08 | 2.27E+08 | 1026 | 885  | 227200000 | 0.14091  | 0.023054751 |
| chr2 | 2.28E+08 | 2.28E+08 | 1135 | 982  | 227550000 | 0.136526 | 0.026639853 |

|      |          |          |      |      |           |          |             |
|------|----------|----------|------|------|-----------|----------|-------------|
| chr2 | 2.28E+08 | 2.28E+08 | 946  | 997  | 228050000 | -0.14813 | 0.017805824 |
| chr2 | 2.28E+08 | 2.28E+08 | 963  | 1011 | 228100000 | -0.14255 | 0.021565839 |
| chr2 | 2.28E+08 | 2.28E+08 | 921  | 954  | 228150000 | -0.12316 | 0.040234083 |
| chr2 | 2.29E+08 | 2.29E+08 | 831  | 718  | 228600000 | 0.138493 | 0.024977069 |
| chr2 | 2.29E+08 | 2.29E+08 | 918  | 745  | 228650000 | 0.228882 | 0.000626258 |
| chr2 | 2.29E+08 | 2.29E+08 | 973  | 830  | 228700000 | 0.156957 | 0.013204248 |
| chr2 | 2.29E+08 | 2.29E+08 | 947  | 976  | 228800000 | -0.11589 | 0.049989325 |
| chr2 | 2.29E+08 | 2.29E+08 | 891  | 773  | 228900000 | 0.132585 | 0.030250158 |
| chr2 | 2.29E+08 | 2.29E+08 | 945  | 826  | 229250000 | 0.121801 | 0.042256851 |
| chr2 | 2.29E+08 | 2.3E+08  | 975  | 797  | 229450000 | 0.218451 | 0.001030541 |
| chr2 | 2.3E+08  | 2.3E+08  | 1009 | 874  | 230200000 | 0.134849 | 0.028129087 |
| chr2 | 2.3E+08  | 2.31E+08 | 951  | 1014 | 230450000 | -0.16491 | 0.009678257 |
| chr2 | 2.32E+08 | 2.32E+08 | 962  | 1003 | 231700000 | -0.13258 | 0.029956107 |
| chr2 | 2.32E+08 | 2.32E+08 | 1040 | 1100 | 231750000 | -0.15329 | 0.014837967 |
| chr2 | 2.32E+08 | 2.32E+08 | 983  | 1063 | 231900000 | -0.18525 | 0.004324839 |
| chr2 | 2.32E+08 | 2.32E+08 | 920  | 984  | 232200000 | -0.1694  | 0.008154759 |
| chr2 | 2.32E+08 | 2.32E+08 | 836  | 883  | 232400000 | -0.15128 | 0.01593734  |
| chr2 | 2.32E+08 | 2.33E+08 | 821  | 863  | 232450000 | -0.14435 | 0.020282934 |
| chr2 | 2.32E+08 | 2.33E+08 | 850  | 902  | 232500000 | -0.15804 | 0.012498435 |
| chr2 | 2.33E+08 | 2.33E+08 | 889  | 918  | 232550000 | -0.11868 | 0.04603803  |
| chr2 | 2.33E+08 | 2.33E+08 | 701  | 738  | 232700000 | -0.14658 | 0.018787751 |
| chr2 | 2.33E+08 | 2.33E+08 | 775  | 852  | 232750000 | -0.20903 | 0.001535867 |
| chr2 | 2.33E+08 | 2.33E+08 | 925  | 960  | 232800000 | -0.12595 | 0.036925573 |
| chr2 | 2.33E+08 | 2.33E+08 | 863  | 920  | 233200000 | -0.16465 | 0.009776408 |
| chr2 | 2.33E+08 | 2.33E+08 | 778  | 873  | 233250000 | -0.23858 | 0.000368456 |
| chr2 | 2.33E+08 | 2.33E+08 | 897  | 942  | 233300000 | -0.14299 | 0.021243866 |
| chr2 | 2.33E+08 | 2.33E+08 | 1005 | 1166 | 233350000 | -0.28674 | 2.58E-05    |
| chr2 | 2.33E+08 | 2.33E+08 | 1028 | 1225 | 233400000 | -0.32531 | 2.28E-06    |
| chr2 | 2.33E+08 | 2.34E+08 | 904  | 988  | 233450000 | -0.20056 | 0.002246533 |
| chr2 | 2.34E+08 | 2.34E+08 | 992  | 1080 | 233750000 | -0.19499 | 0.002864746 |
| chr2 | 2.34E+08 | 2.34E+08 | 492  | 511  | 2.34E+08  | -0.12704 | 0.035703112 |
| chr2 | 2.34E+08 | 2.34E+08 | 494  | 520  | 234050000 | -0.14637 | 0.018921795 |
| chr2 | 2.34E+08 | 2.34E+08 | 910  | 948  | 234100000 | -0.13139 | 0.031121607 |
| chr2 | 2.34E+08 | 2.34E+08 | 1062 | 1113 | 234350000 | -0.14004 | 0.023462151 |
| chr2 | 2.34E+08 | 2.34E+08 | 1006 | 1075 | 234400000 | -0.16808 | 0.008579024 |
| chr2 | 2.35E+08 | 2.35E+08 | 972  | 1130 | 234700000 | -0.28967 | 2.17E-05    |
| chr2 | 2.35E+08 | 2.35E+08 | 996  | 1110 | 234750000 | -0.22871 | 0.000603885 |
| chr2 | 2.35E+08 | 2.35E+08 | 892  | 939  | 235250000 | -0.14645 | 0.018869025 |
| chr2 | 2.35E+08 | 2.35E+08 | 906  | 936  | 235300000 | -0.11937 | 0.045106368 |
| chr2 | 2.35E+08 | 2.35E+08 | 1039 | 1085 | 235400000 | -0.13487 | 0.027822358 |
| chr2 | 2.35E+08 | 2.36E+08 | 1030 | 1095 | 235450000 | -0.16066 | 0.011348396 |
| chr2 | 2.36E+08 | 2.36E+08 | 1028 | 1099 | 236100000 | -0.16872 | 0.008369122 |
| chr2 | 2.36E+08 | 2.36E+08 | 1028 | 1071 | 236250000 | -0.13149 | 0.031024707 |
| chr2 | 2.37E+08 | 2.37E+08 | 996  | 1086 | 236600000 | -0.19718 | 0.002605614 |
| chr2 | 2.37E+08 | 2.37E+08 | 1036 | 1100 | 236650000 | -0.15885 | 0.012130609 |
| chr2 | 2.37E+08 | 2.37E+08 | 964  | 994  | 2.37E+08  | -0.11658 | 0.048980571 |
| chr2 | 2.37E+08 | 2.37E+08 | 979  | 1043 | 237050000 | -0.16373 | 0.010119238 |

|      |          |          |      |      |           |          |             |
|------|----------|----------|------|------|-----------|----------|-------------|
| chr2 | 2.37E+08 | 2.37E+08 | 1016 | 1070 | 237100000 | -0.14708 | 0.018462869 |
| chr2 | 2.37E+08 | 2.37E+08 | 1037 | 1078 | 237150000 | -0.12831 | 0.034306516 |
| chr2 | 2.37E+08 | 2.38E+08 | 1031 | 1065 | 237450000 | -0.11918 | 0.045360407 |
| chr2 | 2.37E+08 | 2.38E+08 | 1118 | 1183 | 237500000 | -0.1539  | 0.014517508 |
| chr2 | 2.38E+08 | 2.38E+08 | 1150 | 1201 | 237550000 | -0.13497 | 0.027729398 |
| chr2 | 2.38E+08 | 2.38E+08 | 1107 | 1148 | 237600000 | -0.12484 | 0.038217021 |
| chr2 | 2.38E+08 | 2.38E+08 | 1089 | 1147 | 237900000 | -0.14723 | 0.018366448 |
| chr2 | 2.38E+08 | 2.38E+08 | 1055 | 1099 | 237950000 | -0.13132 | 0.031193303 |
| chr2 | 2.38E+08 | 2.38E+08 | 1093 | 1165 | 238050000 | -0.16441 | 0.009864131 |
| chr2 | 2.38E+08 | 2.38E+08 | 1104 | 1153 | 238300000 | -0.13502 | 0.027684276 |
| chr2 | 2.38E+08 | 2.38E+08 | 1038 | 1169 | 238350000 | -0.24384 | 0.0002812   |
| chr2 | 2.38E+08 | 2.38E+08 | 1034 | 1175 | 238400000 | -0.2568  | 0.000141458 |
| chr2 | 2.38E+08 | 2.39E+08 | 1033 | 1159 | 238450000 | -0.23841 | 0.000371682 |
| chr2 | 2.38E+08 | 2.39E+08 | 997  | 1085 | 238500000 | -0.1944  | 0.002938486 |
| chr2 | 2.39E+08 | 2.39E+08 | 955  | 1039 | 238550000 | -0.19399 | 0.002990331 |
| chr2 | 2.39E+08 | 2.39E+08 | 988  | 1049 | 238600000 | -0.1588  | 0.012151916 |
| chr2 | 2.39E+08 | 2.39E+08 | 966  | 1024 | 238650000 | -0.15649 | 0.013221926 |
| chr2 | 2.39E+08 | 2.39E+08 | 1018 | 1094 | 2.39E+08  | -0.17625 | 0.006234055 |
| chr2 | 2.39E+08 | 2.39E+08 | 1089 | 1273 | 239050000 | -0.2976  | 1.34E-05    |
| chr2 | 2.39E+08 | 2.39E+08 | 1025 | 1121 | 239100000 | -0.20153 | 0.002151787 |
| chr2 | 2.39E+08 | 2.39E+08 | 979  | 1066 | 239150000 | -0.1952  | 0.002839212 |
| chr2 | 2.39E+08 | 2.39E+08 | 969  | 1085 | 239200000 | -0.2355  | 0.000430791 |
| chr2 | 2.39E+08 | 2.39E+08 | 928  | 1033 | 239250000 | -0.22702 | 0.000656325 |
| chr2 | 2.39E+08 | 2.39E+08 | 992  | 1030 | 239300000 | -0.1266  | 0.036187023 |
| chr2 | 2.39E+08 | 2.39E+08 | 1055 | 1101 | 239350000 | -0.13394 | 0.028672441 |
| chr2 | 2.39E+08 | 2.39E+08 | 1064 | 1167 | 239400000 | -0.20568 | 0.001787988 |
| chr2 | 2.39E+08 | 2.4E+08  | 1064 | 1099 | 239450000 | -0.11907 | 0.045517222 |
| chr2 | 2.4E+08  | 2.4E+08  | 1106 | 1147 | 239650000 | -0.12489 | 0.038162266 |
| chr2 | 2.4E+08  | 2.4E+08  | 1057 | 1104 | 239750000 | -0.13514 | 0.027583121 |
| chr2 | 2.4E+08  | 2.4E+08  | 737  | 804  | 239800000 | -0.1979  | 0.002524585 |
| chr2 | 2.4E+08  | 2.4E+08  | 1024 | 1091 | 239900000 | -0.16381 | 0.010089987 |
| chr2 | 2.4E+08  | 2.4E+08  | 1063 | 1158 | 239950000 | -0.19587 | 0.002758478 |
| chr2 | 2.4E+08  | 2.4E+08  | 1134 | 1233 | 2.40E+08  | -0.19312 | 0.003104157 |
| chr2 | 2.4E+08  | 2.4E+08  | 1102 | 1263 | 240050000 | -0.2691  | 7.17E-05    |
| chr2 | 2.4E+08  | 2.4E+08  | 1078 | 1183 | 240100000 | -0.20646 | 0.001725634 |
| chr2 | 2.4E+08  | 2.4E+08  | 1079 | 1165 | 240250000 | -0.18301 | 0.00474376  |
| chr2 | 2.4E+08  | 2.41E+08 | 1145 | 1191 | 240450000 | -0.1292  | 0.03336527  |
| chr2 | 2.41E+08 | 2.41E+08 | 1076 | 1160 | 240550000 | -0.18082 | 0.005187032 |
| chr2 | 2.41E+08 | 2.41E+08 | 1082 | 1175 | 240600000 | -0.19133 | 0.003350755 |
| chr2 | 2.41E+08 | 2.41E+08 | 1130 | 1239 | 240650000 | -0.20523 | 0.001824828 |
| chr2 | 2.41E+08 | 2.41E+08 | 1073 | 1186 | 240700000 | -0.21683 | 0.001069989 |
| chr2 | 2.41E+08 | 2.41E+08 | 953  | 1046 | 240850000 | -0.20671 | 0.001706863 |
| chr2 | 2.41E+08 | 2.41E+08 | 1107 | 1223 | 240900000 | -0.21614 | 0.00110498  |
| chr2 | 2.41E+08 | 2.41E+08 | 1030 | 1069 | 240950000 | -0.12599 | 0.036883885 |
| chr2 | 2.41E+08 | 2.41E+08 | 954  | 989  | 2.41E+08  | -0.12435 | 0.03879228  |
| chr2 | 2.41E+08 | 2.41E+08 | 1023 | 1055 | 241050000 | -0.11681 | 0.048659184 |
| chr2 | 2.41E+08 | 2.41E+08 | 1127 | 1186 | 241100000 | -0.14599 | 0.019174156 |

|      |          |          |      |      |           |          |             |
|------|----------|----------|------|------|-----------|----------|-------------|
| chr2 | 2.41E+08 | 2.41E+08 | 1101 | 1227 | 241150000 | -0.22869 | 0.000604516 |
| chr2 | 2.41E+08 | 2.41E+08 | 1053 | 1164 | 241200000 | -0.21696 | 0.001063378 |
| chr2 | 2.41E+08 | 2.41E+08 | 1055 | 1103 | 241250000 | -0.13656 | 0.026327837 |
| chr2 | 2.41E+08 | 2.41E+08 | 1129 | 1171 | 241300000 | -0.12507 | 0.037949451 |
| chr2 | 2.41E+08 | 2.41E+08 | 1148 | 1308 | 241350000 | -0.26061 | 0.000114891 |
| chr2 | 2.41E+08 | 2.41E+08 | 1074 | 1246 | 241400000 | -0.28668 | 2.59E-05    |
| chr2 | 2.41E+08 | 2.42E+08 | 989  | 1040 | 241450000 | -0.14491 | 0.019896038 |
| chr2 | 2.41E+08 | 2.42E+08 | 1005 | 1122 | 241500000 | -0.23125 | 0.000532794 |
| chr2 | 2.42E+08 | 2.42E+08 | 1076 | 1188 | 241550000 | -0.21523 | 0.00115324  |
| chr2 | 2.42E+08 | 2.42E+08 | 812  | 886  | 241600000 | -0.1982  | 0.002492129 |
| chr2 | 2.42E+08 | 2.42E+08 | 855  | 1049 | 241650000 | -0.36739 | 1.21E-07    |
| chr2 | 2.42E+08 | 2.42E+08 | 1159 | 1295 | 241700000 | -0.23244 | 0.000502065 |
| chr2 | 2.42E+08 | 2.42E+08 | 1134 | 1223 | 241750000 | -0.18138 | 0.005070826 |
| chr2 | 2.42E+08 | 2.42E+08 | 1075 | 1226 | 241800000 | -0.26199 | 0.000106482 |
| chr2 | 2.42E+08 | 2.42E+08 | 1057 | 1264 | 241850000 | -0.33039 | 1.63E-06    |
| chr2 | 2.42E+08 | 2.42E+08 | 1030 | 1260 | 241900000 | -0.36315 | 1.65E-07    |
| chr2 | 2.42E+08 | 2.42E+08 | 983  | 1155 | 241950000 | -0.305   | 8.46E-06    |
| chr2 | 2.42E+08 | 2.42E+08 | 989  | 1126 | 2.42E+08  | -0.25954 | 0.000121861 |
| chr2 | 2.42E+08 | 2.42E+08 | 1045 | 1134 | 242050000 | -0.19029 | 0.003502224 |
| chr2 | 2.42E+08 | 2.42E+08 | 1041 | 1084 | 242100000 | -0.13077 | 0.031748265 |
| chr2 | 2.42E+08 | 2.42E+08 | 1005 | 1038 | 242200000 | -0.11898 | 0.045628869 |
| chr2 | 2.42E+08 | 2.42E+08 | 959  | 1034 | 242400000 | -0.18101 | 0.005147814 |
| chr2 | 2.42E+08 | 2.43E+08 | 1023 | 1125 | 242450000 | -0.20949 | 0.001503796 |
| chr2 | 2.42E+08 | 2.43E+08 | 937  | 1026 | 242500000 | -0.20328 | 0.001990879 |
| chr2 | 2.43E+08 | 2.43E+08 | 915  | 951  | 242550000 | -0.12805 | 0.03459564  |
| chr2 | 2.43E+08 | 2.43E+08 | 879  | 1007 | 242650000 | -0.2685  | 7.41E-05    |
| chr2 | 2.43E+08 | 2.43E+08 | 854  | 1055 | 242700000 | -0.37731 | 5.80E-08    |
| chr2 | 2.43E+08 | 2.43E+08 | 840  | 1004 | 242750000 | -0.32967 | 1.71E-06    |
| chr2 | 2.43E+08 | 2.43E+08 | 976  | 1141 | 242800000 | -0.29772 | 1.33E-05    |
| chr2 | 2.43E+08 | 2.43E+08 | 1079 | 1192 | 242850000 | -0.21606 | 0.001109126 |
| chr2 | 2.43E+08 | 2.43E+08 | 3    | 4    | 243150000 | -0.48741 | 5.63E-12    |
| chr2 | 2.43E+08 | 2.43E+08 | 3    | 4    | 243200000 | -0.48741 | 5.63E-12    |
| chr9 | 1        | 100000   | 17   | 25   | 50000     | -0.62877 | 2.85E-18    |
| chr9 | 50001    | 150000   | 34   | 37   | 1.00E+05  | -0.19436 | 0.002943437 |
| chr9 | 100001   | 200000   | 36   | 30   | 150000    | 0.190663 | 0.003540577 |
| chr9 | 350001   | 450000   | 1069 | 909  | 4.00E+05  | 0.161538 | 0.011170187 |
| chr9 | 800001   | 900000   | 925  | 805  | 850000    | 0.128093 | 0.034853627 |
| chr9 | 850001   | 950000   | 1024 | 874  | 9.00E+05  | 0.156139 | 0.013599378 |
| chr9 | 1100001  | 1200000  | 937  | 806  | 1150000   | 0.144897 | 0.020156424 |
| chr9 | 1650001  | 1750000  | 1093 | 951  | 1700000   | 0.128404 | 0.034516727 |
| chr9 | 1850001  | 1950000  | 898  | 935  | 1900000   | -0.13062 | 0.031893691 |
| chr9 | 1950001  | 2050000  | 978  | 1052 | 2.00E+06  | -0.1776  | 0.005906133 |
| chr9 | 2350001  | 2450000  | 959  | 839  | 2400000   | 0.120488 | 0.043951914 |
| chr9 | 3050001  | 3150000  | 1001 | 839  | 3100000   | 0.182327 | 0.004993872 |
| chr9 | 3200001  | 3300000  | 1104 | 936  | 3250000   | 0.165788 | 0.009533289 |
| chr9 | 3250001  | 3350000  | 1035 | 904  | 3300000   | 0.122864 | 0.040922632 |
| chr9 | 3450001  | 3550000  | 983  | 828  | 3500000   | 0.175189 | 0.0066401   |

|      |          |          |      |      |          |          |             |
|------|----------|----------|------|------|----------|----------|-------------|
| chr9 | 3500001  | 3600000  | 962  | 820  | 3550000  | 0.158041 | 0.012695716 |
| chr9 | 3800001  | 3900000  | 980  | 1017 | 3850000  | -0.12584 | 0.037057276 |
| chr9 | 3850001  | 3950000  | 983  | 1041 | 3900000  | -0.15508 | 0.013915992 |
| chr9 | 5450001  | 5550000  | 898  | 927  | 5500000  | -0.11823 | 0.046666333 |
| chr9 | 5500001  | 5600000  | 962  | 1015 | 5550000  | -0.14974 | 0.016826318 |
| chr9 | 5900001  | 6000000  | 1004 | 798  | 5950000  | 0.258927 | 0.000134224 |
| chr9 | 5950001  | 6050000  | 949  | 819  | 6.00E+06 | 0.140173 | 0.023627054 |
| chr9 | 6250001  | 6350000  | 701  | 760  | 6300000  | -0.18896 | 0.003704816 |
| chr9 | 6300001  | 6400000  | 739  | 779  | 6350000  | -0.14842 | 0.017623246 |
| chr9 | 6400001  | 6500000  | 977  | 843  | 6450000  | 0.140454 | 0.023407141 |
| chr9 | 6450001  | 6550000  | 923  | 800  | 6500000  | 0.133959 | 0.028947918 |
| chr9 | 6500001  | 6600000  | 933  | 811  | 6550000  | 0.129803 | 0.033036925 |
| chr9 | 6650001  | 6750000  | 635  | 669  | 6700000  | -0.14762 | 0.018120617 |
| chr9 | 6850001  | 6950000  | 982  | 1014 | 6900000  | -0.11863 | 0.04610374  |
| chr9 | 6900001  | 7000000  | 961  | 1023 | 6950000  | -0.16257 | 0.010569222 |
| chr9 | 8100001  | 8200000  | 949  | 1029 | 8150000  | -0.18913 | 0.003677159 |
| chr9 | 8500001  | 8600000  | 982  | 1055 | 8550000  | -0.17582 | 0.006340864 |
| chr9 | 8550001  | 8650000  | 963  | 1067 | 8600000  | -0.22032 | 0.000906586 |
| chr9 | 8600001  | 8700000  | 979  | 1027 | 8650000  | -0.14143 | 0.022396763 |
| chr9 | 9600001  | 9700000  | 1060 | 912  | 9650000  | 0.144587 | 0.020370505 |
| chr9 | 10250001 | 10350000 | 996  | 819  | 10300000 | 0.209911 | 0.001527669 |
| chr9 | 10300001 | 10400000 | 991  | 860  | 10350000 | 0.132177 | 0.030646817 |
| chr9 | 10450001 | 10550000 | 967  | 844  | 10500000 | 0.123901 | 0.039655175 |
| chr9 | 10500001 | 10600000 | 980  | 858  | 10550000 | 0.119432 | 0.045355137 |
| chr9 | 10900001 | 11000000 | 918  | 784  | 10950000 | 0.155269 | 0.014030872 |
| chr9 | 11100001 | 11200000 | 1038 | 897  | 11150000 | 0.138255 | 0.025173537 |
| chr9 | 11650001 | 11750000 | 987  | 843  | 11700000 | 0.155146 | 0.014092843 |
| chr9 | 11700001 | 11800000 | 947  | 812  | 11750000 | 0.149513 | 0.01719474  |
| chr9 | 12000001 | 12100000 | 1002 | 874  | 12050000 | 0.124806 | 0.03857587  |
| chr9 | 12200001 | 12300000 | 1030 | 835  | 12250000 | 0.230424 | 0.000580855 |
| chr9 | 12250001 | 12350000 | 994  | 853  | 12300000 | 0.148328 | 0.017916857 |
| chr9 | 12850001 | 12950000 | 991  | 829  | 12900000 | 0.185141 | 0.004452517 |
| chr9 | 12900001 | 13000000 | 985  | 833  | 12950000 | 0.169435 | 0.008300316 |
| chr9 | 13000001 | 13100000 | 1038 | 906  | 13050000 | 0.123852 | 0.039714833 |
| chr9 | 13200001 | 13300000 | 1062 | 921  | 13250000 | 0.133139 | 0.0297195   |
| chr9 | 13250001 | 13350000 | 939  | 817  | 13300000 | 0.128417 | 0.03450281  |
| chr9 | 14100001 | 14200000 | 1064 | 920  | 14150000 | 0.137421 | 0.025872195 |
| chr9 | 14250001 | 14350000 | 1077 | 1112 | 14300000 | -0.11851 | 0.046274051 |
| chr9 | 14400001 | 14500000 | 993  | 1034 | 14450000 | -0.13074 | 0.03177263  |
| chr9 | 15000001 | 15100000 | 769  | 665  | 15050000 | 0.137257 | 0.026010709 |
| chr9 | 15500001 | 15600000 | 836  | 710  | 15550000 | 0.163312 | 0.010459169 |
| chr9 | 16750001 | 16850000 | 985  | 822  | 16800000 | 0.188614 | 0.003857279 |
| chr9 | 16800001 | 16900000 | 989  | 848  | 16850000 | 0.149534 | 0.017181833 |
| chr9 | 17350001 | 17450000 | 968  | 1004 | 17400000 | -0.12505 | 0.037967313 |
| chr9 | 17950001 | 18050000 | 1131 | 936  | 1.80E+07 | 0.200647 | 0.00230796  |
| chr9 | 18000001 | 18100000 | 1095 | 950  | 18050000 | 0.13256  | 0.03027485  |
| chr9 | 18400001 | 18500000 | 1083 | 949  | 18450000 | 0.118181 | 0.047063996 |



|      |          |          |      |      |          |          |             |
|------|----------|----------|------|------|----------|----------|-------------|
| chr9 | 18450001 | 18550000 | 1067 | 897  | 18500000 | 0.178009 | 0.005939658 |
| chr9 | 18500001 | 18600000 | 990  | 838  | 18550000 | 0.168107 | 0.008732241 |
| chr9 | 19550001 | 19650000 | 995  | 1073 | 19600000 | -0.18125 | 0.005096101 |
| chr9 | 19850001 | 19950000 | 896  | 976  | 19900000 | -0.19575 | 0.002771797 |
| chr9 | 19900001 | 20000000 | 969  | 1030 | 19950000 | -0.16045 | 0.011437308 |
| chr9 | 20700001 | 20800000 | 963  | 808  | 20750000 | 0.180809 | 0.005309895 |
| chr9 | 20750001 | 20850000 | 945  | 778  | 20800000 | 0.208172 | 0.001652522 |
| chr9 | 20800001 | 20900000 | 1064 | 915  | 20850000 | 0.145283 | 0.019893587 |
| chr9 | 21450001 | 21550000 | 885  | 920  | 21500000 | -0.12833 | 0.034290243 |
| chr9 | 22500001 | 22600000 | 938  | 815  | 22550000 | 0.130416 | 0.032405571 |
| chr9 | 22550001 | 22650000 | 975  | 847  | 22600000 | 0.130668 | 0.032148421 |
| chr9 | 22650001 | 22750000 | 854  | 749  | 22700000 | 0.116899 | 0.048870079 |
| chr9 | 22700001 | 22800000 | 852  | 695  | 22750000 | 0.221469 | 0.000893981 |
| chr9 | 23450001 | 23550000 | 1025 | 885  | 23500000 | 0.139503 | 0.024157951 |
| chr9 | 23500001 | 23600000 | 1097 | 962  | 23550000 | 0.117083 | 0.048607143 |
| chr9 | 23700001 | 23800000 | 996  | 1031 | 23750000 | -0.1222  | 0.041427356 |
| chr9 | 24050001 | 24150000 | 1029 | 882  | 24100000 | 0.150021 | 0.016892961 |
| chr9 | 24300001 | 24400000 | 979  | 851  | 24350000 | 0.129778 | 0.033063356 |
| chr9 | 24350001 | 24450000 | 1028 | 846  | 24400000 | 0.208739 | 0.001610839 |
| chr9 | 24400001 | 24500000 | 1028 | 859  | 24450000 | 0.186738 | 0.004169175 |
| chr9 | 24650001 | 24750000 | 938  | 818  | 24700000 | 0.125115 | 0.038211792 |
| chr9 | 24950001 | 25050000 | 940  | 820  | 2.50E+07 | 0.124665 | 0.038741914 |
| chr9 | 25500001 | 25600000 | 1071 | 905  | 25550000 | 0.170597 | 0.007938331 |
| chr9 | 25550001 | 25650000 | 1046 | 906  | 25600000 | 0.134928 | 0.028057461 |
| chr9 | 25650001 | 25750000 | 949  | 828  | 25700000 | 0.124406 | 0.039050215 |
| chr9 | 26100001 | 26200000 | 1047 | 885  | 26150000 | 0.17014  | 0.00807896  |
| chr9 | 26150001 | 26250000 | 1100 | 845  | 26200000 | 0.308109 | 7.71E-06    |
| chr9 | 26200001 | 26300000 | 983  | 774  | 26250000 | 0.272486 | 6.36E-05    |
| chr9 | 26600001 | 26700000 | 928  | 965  | 26650000 | -0.12878 | 0.033811293 |
| chr9 | 26650001 | 26750000 | 925  | 964  | 26700000 | -0.13195 | 0.030570308 |
| chr9 | 26750001 | 26850000 | 902  | 782  | 26800000 | 0.133587 | 0.029295714 |
| chr9 | 26800001 | 26900000 | 893  | 776  | 26850000 | 0.130232 | 0.032594465 |
| chr9 | 27000001 | 27100000 | 956  | 826  | 27050000 | 0.138497 | 0.024973611 |
| chr9 | 27250001 | 27350000 | 949  | 794  | 27300000 | 0.184897 | 0.004497265 |
| chr9 | 27450001 | 27550000 | 1085 | 912  | 27500000 | 0.178218 | 0.00589045  |
| chr9 | 28150001 | 28250000 | 1004 | 867  | 28200000 | 0.139284 | 0.024333771 |
| chr9 | 28200001 | 28300000 | 1025 | 863  | 28250000 | 0.17582  | 0.006477331 |
| chr9 | 28250001 | 28350000 | 1006 | 881  | 28300000 | 0.119045 | 0.045879383 |
| chr9 | 28800001 | 28900000 | 1052 | 831  | 28850000 | 0.267843 | 8.25E-05    |
| chr9 | 28850001 | 28950000 | 1004 | 845  | 28900000 | 0.176364 | 0.006339669 |
| chr9 | 28950001 | 29050000 | 985  | 839  | 2.90E+07 | 0.159081 | 0.01222415  |
| chr9 | 29000001 | 29100000 | 988  | 827  | 29050000 | 0.184252 | 0.004617632 |
| chr9 | 29150001 | 29250000 | 1091 | 932  | 29200000 | 0.154877 | 0.014228746 |
| chr9 | 29200001 | 29300000 | 1019 | 872  | 29250000 | 0.152382 | 0.015548311 |
| chr9 | 29250001 | 29350000 | 961  | 826  | 29300000 | 0.146023 | 0.019396861 |
| chr9 | 29300001 | 29400000 | 987  | 829  | 29350000 | 0.179306 | 0.005639982 |
| chr9 | 29800001 | 29900000 | 973  | 848  | 29850000 | 0.126004 | 0.0371831   |

|      |          |          |      |      |          |          |             |
|------|----------|----------|------|------|----------|----------|-------------|
| chr9 | 29850001 | 29950000 | 1003 | 842  | 29900000 | 0.180058 | 0.005472671 |
| chr9 | 30050001 | 30150000 | 990  | 862  | 30100000 | 0.127369 | 0.035646871 |
| chr9 | 30100001 | 30200000 | 989  | 829  | 30150000 | 0.182227 | 0.005014322 |
| chr9 | 30300001 | 30400000 | 1023 | 893  | 30350000 | 0.123702 | 0.03989572  |
| chr9 | 30350001 | 30450000 | 1025 | 866  | 30400000 | 0.170813 | 0.007872515 |
| chr9 | 30400001 | 30500000 | 962  | 820  | 30450000 | 0.158041 | 0.012695716 |
| chr9 | 30450001 | 30550000 | 949  | 829  | 30500000 | 0.122664 | 0.04117101  |
| chr9 | 30500001 | 30600000 | 911  | 784  | 30550000 | 0.144226 | 0.020621786 |
| chr9 | 30550001 | 30650000 | 929  | 777  | 30600000 | 0.185392 | 0.004406871 |
| chr9 | 30750001 | 30850000 | 974  | 852  | 30800000 | 0.120697 | 0.043679243 |
| chr9 | 30900001 | 31000000 | 993  | 862  | 30950000 | 0.131734 | 0.031081279 |
| chr9 | 30950001 | 31050000 | 929  | 804  | 3.10E+07 | 0.136111 | 0.027001588 |
| chr9 | 31700001 | 31800000 | 1045 | 901  | 31750000 | 0.141532 | 0.022580315 |
| chr9 | 31750001 | 31850000 | 1045 | 889  | 31800000 | 0.160876 | 0.011446099 |
| chr9 | 31800001 | 31900000 | 1011 | 866  | 31850000 | 0.150972 | 0.016339555 |
| chr9 | 32100001 | 32200000 | 883  | 743  | 32150000 | 0.176679 | 0.006261183 |
| chr9 | 32150001 | 32250000 | 851  | 730  | 32200000 | 0.148891 | 0.017570752 |
| chr9 | 32200001 | 32300000 | 832  | 892  | 32250000 | -0.17283 | 0.007134558 |
| chr9 | 33050001 | 33150000 | 869  | 913  | 33100000 | -0.14363 | 0.02078699  |
| chr9 | 33100001 | 33200000 | 942  | 1053 | 33150000 | -0.23308 | 0.000486407 |
| chr9 | 33150001 | 33250000 | 925  | 1001 | 33200000 | -0.18629 | 0.004142383 |
| chr9 | 34350001 | 34450000 | 996  | 1064 | 34400000 | -0.16765 | 0.008720184 |
| chr9 | 34400001 | 34500000 | 1013 | 1072 | 34450000 | -0.15404 | 0.014444357 |
| chr9 | 34500001 | 34600000 | 1059 | 1238 | 34550000 | -0.29768 | 1.33E-05    |
| chr9 | 34550001 | 34650000 | 1073 | 1266 | 34600000 | -0.311   | 5.79E-06    |
| chr9 | 35300001 | 35400000 | 1031 | 1114 | 35350000 | -0.18408 | 0.004539644 |
| chr9 | 35450001 | 35550000 | 964  | 845  | 35500000 | 0.11771  | 0.047721359 |
| chr9 | 35600001 | 35700000 | 970  | 1045 | 35650000 | -0.17982 | 0.005401716 |
| chr9 | 35650001 | 35750000 | 1064 | 1110 | 35700000 | -0.13343 | 0.029148757 |
| chr9 | 36600001 | 36700000 | 898  | 784  | 36650000 | 0.12349  | 0.040153846 |
| chr9 | 36700001 | 36800000 | 1068 | 1106 | 36750000 | -0.12281 | 0.040663191 |
| chr9 | 36750001 | 36850000 | 1107 | 1161 | 36800000 | -0.14108 | 0.02265636  |
| chr9 | 37250001 | 37350000 | 1003 | 878  | 37300000 | 0.119657 | 0.04505359  |
| chr9 | 37350001 | 37450000 | 928  | 1024 | 37400000 | -0.21439 | 0.001199247 |
| chr9 | 38000001 | 38100000 | 1053 | 1153 | 38050000 | -0.20326 | 0.001992898 |
| chr9 | 38300001 | 38400000 | 1047 | 1099 | 38350000 | -0.1423  | 0.021745614 |
| chr9 | 38750001 | 38850000 | 244  | 261  | 38800000 | -0.16954 | 0.008109484 |
| chr9 | 38800001 | 38900000 | 15   | 16   | 38850000 | -0.16548 | 0.009472046 |
| chr9 | 38850001 | 38950000 | 8    | 13   | 38900000 | -0.77281 | 8.72E-26    |
| chr9 | 38900001 | 39000000 | 6    | 13   | 38950000 | -1.18785 | 3.12E-51    |
| chr9 | 39050001 | 39150000 | 80   | 69   | 39100000 | 0.141032 | 0.022960915 |
| chr9 | 39150001 | 39250000 | 38   | 44   | 39200000 | -0.28388 | 3.06E-05    |
| chr9 | 39700001 | 39800000 | 4    | 6    | 39750000 | -0.65733 | 1.11E-19    |
| chr9 | 39750001 | 39850000 | 4    | 9    | 39800000 | -1.2423  | 9.13E-55    |
| chr9 | 39800001 | 39900000 | 2    | 5    | 39850000 | -1.3943  | 1.23E-64    |
| chr9 | 40100001 | 40200000 | 1    | 3    | 40150000 | -1.65733 | 2.87E-81    |
| chr9 | 40150001 | 40250000 | 0    | 1    | 40200000 | #NAME?   | 1.59E-189   |

|      |          |          |    |    |          |          |             |
|------|----------|----------|----|----|----------|----------|-------------|
| chr9 | 40200001 | 40300000 | 0  | 1  | 40250000 | #NAME?   | 1.59E-189   |
| chr9 | 40250001 | 40350000 | 8  | 5  | 40300000 | 0.6057   | 7.32E-17    |
| chr9 | 40300001 | 40400000 | 9  | 6  | 40350000 | 0.512591 | 8.10E-13    |
| chr9 | 40400001 | 40500000 | 5  | 1  | 40450000 | 2.249556 | 7.16E-109   |
| chr9 | 40450001 | 40550000 | 13 | 5  | 40500000 | 1.30614  | 6.62E-57    |
| chr9 | 40500001 | 40600000 | 14 | 8  | 40550000 | 0.734983 | 3.27E-23    |
| chr9 | 40550001 | 40650000 | 17 | 12 | 40600000 | 0.430129 | 1.15E-09    |
| chr9 | 40600001 | 40700000 | 15 | 9  | 40650000 | 0.664594 | 1.17E-19    |
| chr9 | 40650001 | 40750000 | 11 | 6  | 40700000 | 0.802097 | 8.67E-27    |
| chr9 | 40750001 | 40850000 | 19 | 23 | 40800000 | -0.34801 | 4.86E-07    |
| chr9 | 40850001 | 40950000 | 5  | 4  | 40900000 | 0.249556 | 0.000220671 |
| chr9 | 40900001 | 41000000 | 0  | 1  | 40950000 | #NAME?   | 1.59E-189   |
| chr9 | 41000001 | 41100000 | 0  | 1  | 41050000 | #NAME?   | 1.59E-189   |
| chr9 | 41050001 | 41150000 | 0  | 3  | 41100000 | #NAME?   | 1.59E-189   |
| chr9 | 41100001 | 41200000 | 0  | 2  | 41150000 | #NAME?   | 1.59E-189   |
| chr9 | 41150001 | 41250000 | 3  | 1  | 41200000 | 1.512591 | 1.57E-69    |
| chr9 | 41200001 | 41300000 | 5  | 2  | 41250000 | 1.249556 | 2.09E-53    |
| chr9 | 41600001 | 41700000 | 0  | 1  | 41650000 | #NAME?   | 1.59E-189   |
| chr9 | 41650001 | 41750000 | 1  | 6  | 41700000 | -2.65733 | 1.79E-131   |
| chr9 | 41700001 | 41800000 | 1  | 5  | 41750000 | -2.3943  | 1.39E-120   |
| chr9 | 42050001 | 42150000 | 1  | 2  | 42100000 | -1.07237 | 8.26E-44    |
| chr9 | 42100001 | 42200000 | 11 | 9  | 42150000 | 0.217135 | 0.001095891 |
| chr9 | 42150001 | 42250000 | 16 | 9  | 42200000 | 0.757703 | 2.10E-24    |
| chr9 | 42200001 | 42300000 | 7  | 2  | 42250000 | 1.734983 | 1.52E-82    |
| chr9 | 42250001 | 42350000 | 3  | 1  | 42300000 | 1.512591 | 1.57E-69    |
| chr9 | 42300001 | 42400000 | 7  | 8  | 42350000 | -0.26502 | 9.01E-05    |
| chr9 | 42350001 | 42450000 | 6  | 7  | 42400000 | -0.29476 | 1.59E-05    |
| chr9 | 42400001 | 42500000 | 8  | 5  | 42450000 | 0.6057   | 7.32E-17    |
| chr9 | 42450001 | 42550000 | 7  | 5  | 42500000 | 0.413055 | 4.54E-09    |
| chr9 | 42800001 | 42900000 | 3  | 4  | 42850000 | -0.48741 | 5.63E-12    |
| chr9 | 42850001 | 42950000 | 5  | 7  | 42900000 | -0.5578  | 5.82E-15    |
| chr9 | 43000001 | 43100000 | 4  | 7  | 43050000 | -0.87973 | 6.33E-32    |
| chr9 | 43050001 | 43150000 | 4  | 5  | 43100000 | -0.3943  | 1.58E-08    |
| chr9 | 43100001 | 43200000 | 8  | 10 | 43150000 | -0.3943  | 1.58E-08    |
| chr9 | 43150001 | 43250000 | 5  | 8  | 43200000 | -0.75044 | 1.48E-24    |
| chr9 | 43300001 | 43400000 | 20 | 25 | 43350000 | -0.3943  | 1.58E-08    |
| chr9 | 43350001 | 43450000 | 20 | 30 | 43400000 | -0.65733 | 1.11E-19    |
| chr9 | 43400001 | 43500000 | 32 | 26 | 43450000 | 0.227189 | 0.000679876 |
| chr9 | 43450001 | 43550000 | 46 | 36 | 43500000 | 0.281265 | 3.86E-05    |
| chr9 | 43500001 | 43600000 | 28 | 31 | 43550000 | -0.21921 | 0.000955804 |
| chr9 | 43550001 | 43650000 | 29 | 21 | 43600000 | 0.393292 | 2.11E-08    |
| chr9 | 43600001 | 43700000 | 72 | 59 | 43650000 | 0.21491  | 0.001215103 |
| chr9 | 43650001 | 43750000 | 50 | 56 | 43700000 | -0.23587 | 0.000422781 |
| chr9 | 43700001 | 43800000 | 6  | 11 | 43750000 | -0.94684 | 5.75E-36    |
| chr9 | 43750001 | 43850000 | 15 | 6  | 43800000 | 1.249556 | 2.09E-53    |
| chr9 | 43800001 | 43900000 | 17 | 19 | 43850000 | -0.23284 | 0.000492315 |
| chr9 | 43850001 | 43950000 | 8  | 17 | 43900000 | -1.15983 | 2.03E-49    |

|      |          |          |     |     |          |          |             |
|------|----------|----------|-----|-----|----------|----------|-------------|
| chr9 | 43900001 | 44000000 | 0   | 2   | 43950000 | #NAME?   | 1.59E-189   |
| chr9 | 44100001 | 44200000 | 71  | 79  | 44150000 | -0.22641 | 0.000676162 |
| chr9 | 44150001 | 44250000 | 75  | 91  | 44200000 | -0.35135 | 3.84E-07    |
| chr9 | 44200001 | 44300000 | 40  | 44  | 44250000 | -0.20988 | 0.001477547 |
| chr9 | 44250001 | 44350000 | 2   | 3   | 44300000 | -0.65733 | 1.11E-19    |
| chr9 | 44350001 | 44450000 | 6   | 9   | 44400000 | -0.65733 | 1.11E-19    |
| chr9 | 44400001 | 44500000 | 17  | 24  | 44450000 | -0.56987 | 1.67E-15    |
| chr9 | 44450001 | 44550000 | 15  | 20  | 44500000 | -0.48741 | 5.63E-12    |
| chr9 | 44650001 | 44750000 | 8   | 17  | 44700000 | -1.15983 | 2.03E-49    |
| chr9 | 44700001 | 44800000 | 33  | 51  | 44750000 | -0.7004  | 6.93E-22    |
| chr9 | 44750001 | 44850000 | 60  | 73  | 44800000 | -0.35531 | 2.90E-07    |
| chr9 | 44800001 | 44900000 | 219 | 257 | 44850000 | -0.30321 | 9.46E-06    |
| chr9 | 44850001 | 44950000 | 193 | 228 | 44900000 | -0.3128  | 5.16E-06    |
| chr9 | 44900001 | 45000000 | 34  | 46  | 44950000 | -0.50847 | 7.76E-13    |
| chr9 | 44950001 | 45050000 | 26  | 37  | 4.50E+07 | -0.58139 | 4.98E-16    |
| chr9 | 45000001 | 45100000 | 1   | 3   | 45050000 | -1.65733 | 2.87E-81    |
| chr9 | 45050001 | 45150000 | 2   | 6   | 45100000 | -1.65733 | 2.87E-81    |
| chr9 | 45100001 | 45200000 | 2   | 4   | 45150000 | -1.07237 | 8.26E-44    |
| chr9 | 45300001 | 45400000 | 21  | 17  | 45350000 | 0.232483 | 0.000525015 |
| chr9 | 45350001 | 45450000 | 39  | 29  | 45400000 | 0.355049 | 3.45E-07    |
| chr9 | 45400001 | 45500000 | 23  | 15  | 45450000 | 0.5443   | 3.86E-14    |
| chr9 | 45500001 | 45600000 | 2   | 4   | 45550000 | -1.07237 | 8.26E-44    |
| chr9 | 45550001 | 45650000 | 5   | 3   | 45600000 | 0.664594 | 1.17E-19    |
| chr9 | 45600001 | 45700000 | 7   | 5   | 45650000 | 0.413055 | 4.54E-09    |
| chr9 | 45650001 | 45750000 | 26  | 22  | 45700000 | 0.168636 | 0.008557728 |
| chr9 | 45700001 | 45800000 | 25  | 20  | 45750000 | 0.249556 | 0.000220671 |
| chr9 | 45750001 | 45850000 | 3   | 1   | 45800000 | 1.512591 | 1.57E-69    |
| chr9 | 46050001 | 46150000 | 4   | 3   | 46100000 | 0.342666 | 8.12E-07    |
| chr9 | 46350001 | 46450000 | 1   | 3   | 46400000 | -1.65733 | 2.87E-81    |
| chr9 | 46400001 | 46500000 | 0   | 1   | 46450000 | #NAME?   | 1.59E-189   |
| chr9 | 46650001 | 46750000 | 1   | 2   | 46700000 | -1.07237 | 8.26E-44    |
| chr9 | 46700001 | 46800000 | 5   | 9   | 46750000 | -0.92037 | 2.34E-34    |
| chr9 | 46750001 | 46850000 | 5   | 7   | 46800000 | -0.5578  | 5.82E-15    |
| chr9 | 46800001 | 46900000 | 5   | 7   | 46850000 | -0.5578  | 5.82E-15    |
| chr9 | 46850001 | 46950000 | 5   | 8   | 46900000 | -0.75044 | 1.48E-24    |
| chr9 | 46900001 | 47000000 | 2   | 1   | 46950000 | 0.927628 | 7.06E-34    |
| chr9 | 47000001 | 47100000 | 1   | 2   | 47050000 | -1.07237 | 8.26E-44    |
| chr9 | 47100001 | 47200000 | 16  | 30  | 47150000 | -0.97926 | 5.82E-38    |
| chr9 | 47200001 | 47300000 | 45  | 26  | 47250000 | 0.719042 | 2.18E-22    |
| chr9 | 65500001 | 65600000 | 5   | 4   | 65550000 | 0.249556 | 0.000220671 |
| chr9 | 65550001 | 65650000 | 8   | 10  | 65600000 | -0.3943  | 1.58E-08    |
| chr9 | 65600001 | 65700000 | 4   | 6   | 65650000 | -0.65733 | 1.11E-19    |
| chr9 | 65900001 | 66000000 | 0   | 1   | 65950000 | #NAME?   | 1.59E-189   |
| chr9 | 66000001 | 66100000 | 4   | 3   | 66050000 | 0.342666 | 8.12E-07    |
| chr9 | 66050001 | 66150000 | 0   | 1   | 66100000 | #NAME?   | 1.59E-189   |
| chr9 | 66150001 | 66250000 | 10  | 7   | 66200000 | 0.442201 | 4.22E-10    |
| chr9 | 66200001 | 66300000 | 26  | 21  | 66250000 | 0.235751 | 0.000446507 |

|      |          |          |      |      |          |          |             |
|------|----------|----------|------|------|----------|----------|-------------|
| chr9 | 66250001 | 66350000 | 45   | 33   | 66300000 | 0.375087 | 8.22E-08    |
| chr9 | 66300001 | 66400000 | 28   | 19   | 66350000 | 0.487056 | 8.51E-12    |
| chr9 | 66550001 | 66650000 | 3    | 5    | 66600000 | -0.80934 | 7.76E-28    |
| chr9 | 66600001 | 66700000 | 6    | 5    | 66650000 | 0.190663 | 0.003540577 |
| chr9 | 66650001 | 66750000 | 28   | 19   | 66700000 | 0.487056 | 8.51E-12    |
| chr9 | 66700001 | 66800000 | 86   | 67   | 66750000 | 0.287804 | 2.64E-05    |
| chr9 | 66950001 | 67050000 | 20   | 21   | 6.70E+07 | -0.14276 | 0.02141004  |
| chr9 | 67000001 | 67100000 | 3    | 4    | 67050000 | -0.48741 | 5.63E-12    |
| chr9 | 67150001 | 67250000 | 3    | 5    | 67200000 | -0.80934 | 7.76E-28    |
| chr9 | 67250001 | 67350000 | 79   | 84   | 67300000 | -0.16091 | 0.011243654 |
| chr9 | 67300001 | 67400000 | 81   | 84   | 67350000 | -0.12484 | 0.038217021 |
| chr9 | 67350001 | 67450000 | 12   | 8    | 67400000 | 0.512591 | 8.10E-13    |
| chr9 | 67700001 | 67800000 | 14   | 27   | 67750000 | -1.0199  | 1.71E-40    |
| chr9 | 67750001 | 67850000 | 11   | 27   | 67800000 | -1.36783 | 6.37E-63    |
| chr9 | 67800001 | 67900000 | 2    | 10   | 67850000 | -2.3943  | 1.39E-120   |
| chr9 | 67850001 | 67950000 | 7    | 9    | 67900000 | -0.43494 | 5.85E-10    |
| chr9 | 67900001 | 68000000 | 5    | 7    | 67950000 | -0.5578  | 5.82E-15    |
| chr9 | 67950001 | 68050000 | 0    | 4    | 6.80E+07 | #NAME?   | 1.59E-189   |
| chr9 | 68050001 | 68150000 | 4    | 5    | 68100000 | -0.3943  | 1.58E-08    |
| chr9 | 68100001 | 68200000 | 21   | 27   | 68150000 | -0.43494 | 5.85E-10    |
| chr9 | 68200001 | 68300000 | 37   | 30   | 68250000 | 0.230191 | 0.000587525 |
| chr9 | 68250001 | 68350000 | 50   | 58   | 68300000 | -0.2865  | 2.62E-05    |
| chr9 | 68350001 | 68450000 | 1538 | 1586 | 68400000 | -0.11671 | 0.048801763 |
| chr9 | 68400001 | 68500000 | 1582 | 1649 | 68450000 | -0.13221 | 0.030314825 |
| chr9 | 68500001 | 68600000 | 62   | 54   | 68550000 | 0.126937 | 0.036127101 |
| chr9 | 68600001 | 68700000 | 22   | 19   | 68650000 | 0.139132 | 0.02445574  |
| chr9 | 68650001 | 68750000 | 37   | 41   | 68700000 | -0.22047 | 0.000900288 |
| chr9 | 68700001 | 68800000 | 20   | 31   | 68750000 | -0.70464 | 4.16E-22    |
| chr9 | 68800001 | 68900000 | 11   | 6    | 68850000 | 0.802097 | 8.67E-27    |
| chr9 | 68900001 | 69000000 | 138  | 143  | 68950000 | -0.12372 | 0.039553521 |
| chr9 | 69100001 | 69200000 | 15   | 19   | 69150000 | -0.41341 | 3.47E-09    |
| chr9 | 69150001 | 69250000 | 13   | 20   | 69200000 | -0.69386 | 1.52E-21    |
| chr9 | 69200001 | 69300000 | 9    | 7    | 69250000 | 0.290198 | 2.29E-05    |
| chr9 | 69350001 | 69450000 | 20   | 10   | 69400000 | 0.927628 | 7.06E-34    |
| chr9 | 69400001 | 69500000 | 29   | 25   | 69450000 | 0.141753 | 0.02241399  |
| chr9 | 69500001 | 69600000 | 23   | 13   | 69550000 | 0.75075  | 4.90E-24    |
| chr9 | 69550001 | 69650000 | 11   | 9    | 69600000 | 0.217135 | 0.001095891 |
| chr9 | 69600001 | 69700000 | 6    | 10   | 69650000 | -0.80934 | 7.76E-28    |
| chr9 | 69650001 | 69750000 | 13   | 14   | 69700000 | -0.17929 | 0.00551887  |
| chr9 | 69850001 | 69950000 | 20   | 15   | 69900000 | 0.342666 | 8.12E-07    |
| chr9 | 69950001 | 70050000 | 56   | 60   | 7.00E+07 | -0.17191 | 0.007397339 |
| chr9 | 70050001 | 70150000 | 5    | 4    | 70100000 | 0.249556 | 0.000220671 |
| chr9 | 70100001 | 70200000 | 12   | 7    | 70150000 | 0.705236 | 1.10E-21    |
| chr9 | 70150001 | 70250000 | 9    | 6    | 70200000 | 0.512591 | 8.10E-13    |
| chr9 | 70200001 | 70300000 | 1    | 2    | 70250000 | -1.07237 | 8.26E-44    |
| chr9 | 70350001 | 70450000 | 3    | 5    | 70400000 | -0.80934 | 7.76E-28    |
| chr9 | 70400001 | 70500000 | 8    | 7    | 70450000 | 0.120273 | 0.044234652 |

|      |          |          |      |      |          |          |             |
|------|----------|----------|------|------|----------|----------|-------------|
| chr9 | 70450001 | 70550000 | 6    | 3    | 70500000 | 0.927628 | 7.06E-34    |
| chr9 | 70500001 | 70600000 | 5    | 6    | 70550000 | -0.33541 | 1.16E-06    |
| chr9 | 70550001 | 70650000 | 9    | 12   | 70600000 | -0.48741 | 5.63E-12    |
| chr9 | 70600001 | 70700000 | 11   | 14   | 70650000 | -0.4203  | 1.98E-09    |
| chr9 | 70650001 | 70750000 | 7    | 10   | 70700000 | -0.58694 | 2.76E-16    |
| chr9 | 70700001 | 70800000 | 1    | 3    | 70750000 | -1.65733 | 2.87E-81    |
| chr9 | 70750001 | 70850000 | 5    | 7    | 70800000 | -0.5578  | 5.82E-15    |
| chr9 | 70800001 | 70900000 | 11   | 12   | 70850000 | -0.1979  | 0.002524585 |
| chr9 | 70850001 | 70950000 | 14   | 17   | 70900000 | -0.35248 | 3.55E-07    |
| chr9 | 70900001 | 71000000 | 30   | 42   | 70950000 | -0.5578  | 5.82E-15    |
| chr9 | 71500001 | 71600000 | 1043 | 886  | 71550000 | 0.162989 | 0.010585725 |
| chr9 | 71750001 | 71850000 | 1003 | 861  | 71800000 | 0.147865 | 0.01820648  |
| chr9 | 71800001 | 71900000 | 985  | 828  | 71850000 | 0.178121 | 0.005913089 |
| chr9 | 72350001 | 72450000 | 989  | 845  | 72400000 | 0.154647 | 0.01434622  |
| chr9 | 72400001 | 72500000 | 1023 | 874  | 72450000 | 0.154729 | 0.014304366 |
| chr9 | 72650001 | 72750000 | 1071 | 1119 | 72700000 | -0.13562 | 0.027148823 |
| chr9 | 72800001 | 72900000 | 844  | 740  | 72850000 | 0.117346 | 0.048234045 |
| chr9 | 72850001 | 72950000 | 928  | 801  | 72900000 | 0.139951 | 0.023801896 |
| chr9 | 73050001 | 73150000 | 1084 | 925  | 73100000 | 0.156468 | 0.013439252 |
| chr9 | 73250001 | 73350000 | 674  | 584  | 73300000 | 0.134408 | 0.028532001 |
| chr9 | 73400001 | 73500000 | 1123 | 973  | 73450000 | 0.134474 | 0.028471368 |
| chr9 | 73450001 | 73550000 | 1115 | 876  | 73500000 | 0.275669 | 5.32E-05    |
| chr9 | 73500001 | 73600000 | 1072 | 903  | 73550000 | 0.175135 | 0.006654106 |
| chr9 | 73900001 | 74000000 | 1023 | 896  | 73950000 | 0.118864 | 0.046125612 |
| chr9 | 76300001 | 76400000 | 1057 | 913  | 76350000 | 0.138917 | 0.024630387 |
| chr9 | 76350001 | 76450000 | 1056 | 854  | 76400000 | 0.23393  | 0.000488783 |
| chr9 | 76400001 | 76500000 | 1078 | 848  | 76450000 | 0.273849 | 5.89E-05    |
| chr9 | 76450001 | 76550000 | 1024 | 858  | 76500000 | 0.182794 | 0.004900155 |
| chr9 | 76500001 | 76600000 | 1033 | 810  | 76550000 | 0.278475 | 4.53E-05    |
| chr9 | 76550001 | 76650000 | 1065 | 808  | 76600000 | 0.326054 | 2.46E-06    |
| chr9 | 76850001 | 76950000 | 1069 | 904  | 76900000 | 0.169495 | 0.008281284 |
| chr9 | 76900001 | 77000000 | 1063 | 875  | 76950000 | 0.208415 | 0.00163456  |
| chr9 | 77100001 | 77200000 | 1116 | 893  | 77150000 | 0.249233 | 0.000224426 |
| chr9 | 77150001 | 77250000 | 1047 | 872  | 77200000 | 0.19149  | 0.003419537 |
| chr9 | 77300001 | 77400000 | 1080 | 910  | 77350000 | 0.174721 | 0.006763139 |
| chr9 | 77500001 | 77600000 | 976  | 814  | 77550000 | 0.189481 | 0.003720288 |
| chr9 | 77550001 | 77650000 | 1019 | 805  | 77600000 | 0.267722 | 8.30E-05    |
| chr9 | 77700001 | 77800000 | 890  | 936  | 77750000 | -0.14507 | 0.019785772 |
| chr9 | 78550001 | 78650000 | 1012 | 882  | 78600000 | 0.125987 | 0.037202352 |
| chr9 | 78700001 | 78800000 | 1105 | 960  | 78750000 | 0.130568 | 0.0322503   |
| chr9 | 79200001 | 79300000 | 940  | 821  | 79250000 | 0.122907 | 0.040870104 |
| chr9 | 79550001 | 79650000 | 883  | 937  | 79600000 | -0.15801 | 0.012511692 |
| chr9 | 79900001 | 80000000 | 925  | 810  | 79950000 | 0.11916  | 0.045723278 |
| chr9 | 79950001 | 80050000 | 905  | 786  | 8.00E+07 | 0.131017 | 0.031796396 |
| chr9 | 80300001 | 80400000 | 853  | 933  | 80350000 | -0.2017  | 0.002135726 |
| chr9 | 81300001 | 81400000 | 1100 | 956  | 81350000 | 0.130049 | 0.032782393 |
| chr9 | 81750001 | 81850000 | 992  | 1023 | 81800000 | -0.11677 | 0.048720327 |

|      |          |          |      |      |          |          |             |
|------|----------|----------|------|------|----------|----------|-------------|
| chr9 | 82150001 | 82250000 | 970  | 1007 | 82200000 | -0.12638 | 0.036441111 |
| chr9 | 82900001 | 83000000 | 902  | 943  | 82950000 | -0.1365  | 0.026379237 |
| chr9 | 83050001 | 83150000 | 903  | 993  | 83100000 | -0.20944 | 0.001507317 |
| chr9 | 83150001 | 83250000 | 967  | 800  | 83200000 | 0.201144 | 0.00225825  |
| chr9 | 83200001 | 83300000 | 929  | 791  | 83250000 | 0.159629 | 0.011981844 |
| chr9 | 83350001 | 83450000 | 936  | 817  | 83400000 | 0.123801 | 0.039776541 |
| chr9 | 83400001 | 83500000 | 982  | 849  | 83450000 | 0.137587 | 0.025731806 |
| chr9 | 83450001 | 83550000 | 1020 | 861  | 83500000 | 0.172112 | 0.007487106 |
| chr9 | 83500001 | 83600000 | 1023 | 785  | 83550000 | 0.30967  | 7.00E-06    |
| chr9 | 83550001 | 83650000 | 989  | 803  | 83600000 | 0.228199 | 0.000647399 |
| chr9 | 84350001 | 84450000 | 892  | 760  | 84400000 | 0.158673 | 0.012407595 |
| chr9 | 84600001 | 84700000 | 922  | 787  | 84650000 | 0.156031 | 0.013652022 |
| chr9 | 84700001 | 84800000 | 1064 | 903  | 84750000 | 0.164328 | 0.010069976 |
| chr9 | 84750001 | 84850000 | 1061 | 884  | 84800000 | 0.190935 | 0.003500351 |
| chr9 | 84800001 | 84900000 | 970  | 843  | 84850000 | 0.13008  | 0.032750293 |
| chr9 | 85100001 | 85200000 | 979  | 1036 | 85150000 | -0.15402 | 0.014458611 |
| chr9 | 85200001 | 85300000 | 1105 | 952  | 85250000 | 0.142641 | 0.021755666 |
| chr9 | 85650001 | 85750000 | 964  | 840  | 85700000 | 0.126272 | 0.03687698  |
| chr9 | 86400001 | 86500000 | 350  | 302  | 86450000 | 0.140435 | 0.023422375 |
| chr9 | 86550001 | 86650000 | 875  | 767  | 86600000 | 0.117685 | 0.047756936 |
| chr9 | 86600001 | 86700000 | 933  | 789  | 86650000 | 0.16948  | 0.008286168 |
| chr9 | 86700001 | 86800000 | 1042 | 892  | 86750000 | 0.151868 | 0.015833049 |
| chr9 | 87050001 | 87150000 | 870  | 938  | 87100000 | -0.18094 | 0.005160584 |
| chr9 | 87100001 | 87200000 | 917  | 1000 | 87150000 | -0.19738 | 0.002583022 |
| chr9 | 87400001 | 87500000 | 1062 | 1112 | 87450000 | -0.13874 | 0.024497682 |
| chr9 | 88150001 | 88250000 | 1040 | 880  | 88200000 | 0.168636 | 0.008557728 |
| chr9 | 88200001 | 88300000 | 1010 | 857  | 88250000 | 0.164616 | 0.009962051 |
| chr9 | 88400001 | 88500000 | 392  | 340  | 88450000 | 0.132947 | 0.029902435 |
| chr9 | 90150001 | 90250000 | 1065 | 1122 | 90200000 | -0.14759 | 0.018139751 |
| chr9 | 90200001 | 90300000 | 1064 | 1106 | 90250000 | -0.12823 | 0.034401396 |
| chr9 | 90850001 | 90950000 | 874  | 738  | 90900000 | 0.171641 | 0.007625037 |
| chr9 | 90900001 | 91000000 | 798  | 664  | 90950000 | 0.192834 | 0.003230754 |
| chr9 | 91050001 | 91150000 | 875  | 908  | 91100000 | -0.12578 | 0.037122395 |
| chr9 | 91100001 | 91200000 | 902  | 952  | 91150000 | -0.15021 | 0.016554483 |
| chr9 | 91200001 | 91300000 | 914  | 944  | 91250000 | -0.11896 | 0.045653656 |
| chr9 | 91600001 | 91700000 | 1044 | 1106 | 91650000 | -0.1556  | 0.013655704 |
| chr9 | 91900001 | 92000000 | 1031 | 1085 | 91950000 | -0.14602 | 0.019151559 |
| chr9 | 91950001 | 92050000 | 1111 | 1254 | 9.20E+07 | -0.24705 | 0.000237845 |
| chr9 | 92000001 | 92100000 | 1057 | 1162 | 92050000 | -0.20901 | 0.001537441 |
| chr9 | 92050001 | 92150000 | 1034 | 1138 | 92100000 | -0.21064 | 0.001426858 |
| chr9 | 92100001 | 92200000 | 1020 | 1095 | 92150000 | -0.17473 | 0.006619886 |
| chr9 | 92150001 | 92250000 | 1032 | 1094 | 92200000 | -0.15654 | 0.013198349 |
| chr9 | 92350001 | 92450000 | 70   | 75   | 92400000 | -0.17191 | 0.007397339 |
| chr9 | 92450001 | 92550000 | 851  | 884  | 92500000 | -0.12726 | 0.035456598 |
| chr9 | 92500001 | 92600000 | 318  | 347  | 92550000 | -0.19828 | 0.002483216 |
| chr9 | 92600001 | 92700000 | 231  | 246  | 92650000 | -0.16314 | 0.010346992 |
| chr9 | 93550001 | 93650000 | 1029 | 1123 | 93600000 | -0.19849 | 0.002460927 |

|      |          |          |      |      |           |          |             |
|------|----------|----------|------|------|-----------|----------|-------------|
| chr9 | 93600001 | 93700000 | 1033 | 1213 | 93650000  | -0.30411 | 8.94E-06    |
| chr9 | 93650001 | 93750000 | 1040 | 1169 | 93700000  | -0.24106 | 0.000324552 |
| chr9 | 93900001 | 94000000 | 1043 | 897  | 93950000  | 0.145187 | 0.019958281 |
| chr9 | 94300001 | 94400000 | 1041 | 909  | 94350000  | 0.123246 | 0.040452135 |
| chr9 | 94350001 | 94450000 | 1016 | 879  | 94400000  | 0.136594 | 0.026580898 |
| chr9 | 94500001 | 94600000 | 1032 | 1094 | 94550000  | -0.15654 | 0.013198349 |
| chr9 | 95100001 | 95200000 | 969  | 793  | 95150000  | 0.216804 | 0.00111291  |
| chr9 | 95500001 | 95600000 | 804  | 845  | 95550000  | -0.14413 | 0.020437654 |
| chr9 | 95550001 | 95650000 | 728  | 767  | 95600000  | -0.14766 | 0.018096384 |
| chr9 | 95600001 | 95700000 | 757  | 792  | 95650000  | -0.13758 | 0.025461244 |
| chr9 | 95650001 | 95750000 | 853  | 884  | 95700000  | -0.12387 | 0.039367916 |
| chr9 | 95750001 | 95850000 | 965  | 1043 | 95800000  | -0.18451 | 0.004459213 |
| chr9 | 95800001 | 95900000 | 1005 | 1126 | 95850000  | -0.23638 | 0.000411977 |
| chr9 | 95850001 | 95950000 | 1010 | 1109 | 95900000  | -0.20728 | 0.001663406 |
| chr9 | 95900001 | 96000000 | 1027 | 1149 | 95950000  | -0.23431 | 0.000457215 |
| chr9 | 95950001 | 96050000 | 1072 | 1194 | 9.60E+07  | -0.22787 | 0.000629441 |
| chr9 | 96000001 | 96100000 | 1035 | 1072 | 96050000  | -0.12305 | 0.040374061 |
| chr9 | 96300001 | 96400000 | 997  | 1052 | 96350000  | -0.14984 | 0.016768274 |
| chr9 | 96350001 | 96450000 | 1024 | 1127 | 96400000  | -0.21064 | 0.001426371 |
| chr9 | 96600001 | 96700000 | 1012 | 1083 | 96650000  | -0.1702  | 0.007906522 |
| chr9 | 96650001 | 96750000 | 1019 | 1157 | 96700000  | -0.25561 | 0.000150858 |
| chr9 | 96700001 | 96800000 | 920  | 1007 | 96750000  | -0.20273 | 0.002040472 |
| chr9 | 96950001 | 97050000 | 831  | 718  | 9.70E+07  | 0.138493 | 0.024977069 |
| chr9 | 97000001 | 97100000 | 590  | 505  | 97050000  | 0.15206  | 0.015726292 |
| chr9 | 97100001 | 97200000 | 73   | 61   | 97150000  | 0.186715 | 0.004173139 |
| chr9 | 98000001 | 98100000 | 943  | 809  | 98050000  | 0.148746 | 0.017659164 |
| chr9 | 98200001 | 98300000 | 1081 | 1130 | 98250000  | -0.13633 | 0.026530225 |
| chr9 | 98250001 | 98350000 | 1009 | 1067 | 98300000  | -0.15301 | 0.014990327 |
| chr9 | 98700001 | 98800000 | 973  | 1010 | 98750000  | -0.12622 | 0.036626374 |
| chr9 | 98750001 | 98850000 | 996  | 1097 | 98800000  | -0.21172 | 0.001357543 |
| chr9 | 98800001 | 98900000 | 1047 | 1092 | 98850000  | -0.13308 | 0.029479581 |
| chr9 | 98850001 | 98950000 | 1003 | 1090 | 98900000  | -0.19238 | 0.003204708 |
| chr9 | 98900001 | 99000000 | 1008 | 1098 | 98950000  | -0.19575 | 0.002771797 |
| chr9 | 99000001 | 99100000 | 881  | 921  | 99050000  | -0.13643 | 0.026440902 |
| chr9 | 99300001 | 99400000 | 924  | 808  | 99350000  | 0.121166 | 0.043070149 |
| chr9 | 99650001 | 99750000 | 150  | 128  | 99700000  | 0.156447 | 0.013449326 |
| chr9 | 99700001 | 99800000 | 172  | 134  | 99750000  | 0.287804 | 2.64E-05    |
| chr9 | 99900001 | 1E+08    | 355  | 306  | 99950000  | 0.141916 | 0.022292237 |
| chr9 | 1E+08    | 1.01E+08 | 1035 | 1070 | 100500000 | -0.12035 | 0.043799912 |
| chr9 | 1.01E+08 | 1.01E+08 | 957  | 995  | 1.01E+08  | -0.12855 | 0.034052931 |
| chr9 | 1.01E+08 | 1.01E+08 | 950  | 988  | 101050000 | -0.12896 | 0.033620948 |
| chr9 | 1.01E+08 | 1.01E+08 | 1056 | 1129 | 101400000 | -0.16881 | 0.008341942 |
| chr9 | 1.01E+08 | 1.02E+08 | 1070 | 1110 | 101450000 | -0.12532 | 0.037654219 |
| chr9 | 1.02E+08 | 1.02E+08 | 1008 | 1055 | 101600000 | -0.13812 | 0.025010881 |
| chr9 | 1.02E+08 | 1.02E+08 | 989  | 1050 | 101900000 | -0.15872 | 0.012189819 |
| chr9 | 1.02E+08 | 1.02E+08 | 985  | 1040 | 101950000 | -0.15076 | 0.016234464 |
| chr9 | 1.02E+08 | 1.02E+08 | 964  | 1025 | 1.02E+08  | -0.16089 | 0.011251086 |



|      |          |          |      |      |           |          |             |
|------|----------|----------|------|------|-----------|----------|-------------|
| chr9 | 1.03E+08 | 1.03E+08 | 890  | 774  | 102950000 | 0.1291   | 0.033774248 |
| chr9 | 1.03E+08 | 1.03E+08 | 922  | 780  | 1.03E+08  | 0.168921 | 0.008465282 |
| chr9 | 1.03E+08 | 1.03E+08 | 946  | 816  | 103050000 | 0.140899 | 0.0230627   |
| chr9 | 1.03E+08 | 1.04E+08 | 724  | 758  | 103500000 | -0.13858 | 0.02463205  |
| chr9 | 1.04E+08 | 1.04E+08 | 1039 | 856  | 103750000 | 0.207141 | 0.001730937 |
| chr9 | 1.04E+08 | 1.04E+08 | 1018 | 1051 | 104150000 | -0.1184  | 0.046430055 |
| chr9 | 1.05E+08 | 1.05E+08 | 1004 | 853  | 104600000 | 0.16277  | 0.010672167 |
| chr9 | 1.05E+08 | 1.05E+08 | 951  | 825  | 1.05E+08  | 0.132679 | 0.030159319 |
| chr9 | 1.05E+08 | 1.05E+08 | 872  | 763  | 105100000 | 0.120273 | 0.044234652 |
| chr9 | 1.05E+08 | 1.05E+08 | 920  | 805  | 105150000 | 0.120273 | 0.044234652 |
| chr9 | 1.05E+08 | 1.05E+08 | 984  | 845  | 105200000 | 0.147335 | 0.01854212  |
| chr9 | 1.05E+08 | 1.05E+08 | 995  | 855  | 105250000 | 0.1464   | 0.019147641 |
| chr9 | 1.05E+08 | 1.05E+08 | 1012 | 827  | 105400000 | 0.218878 | 0.001010091 |
| chr9 | 1.05E+08 | 1.06E+08 | 1029 | 881  | 105450000 | 0.151657 | 0.015950925 |
| chr9 | 1.06E+08 | 1.06E+08 | 1016 | 862  | 105650000 | 0.164769 | 0.00990532  |
| chr9 | 1.06E+08 | 1.06E+08 | 919  | 772  | 1.06E+08  | 0.179092 | 0.005688447 |
| chr9 | 1.06E+08 | 1.06E+08 | 996  | 831  | 106050000 | 0.188925 | 0.003807479 |
| chr9 | 1.06E+08 | 1.06E+08 | 1000 | 858  | 106350000 | 0.148579 | 0.017762127 |
| chr9 | 1.06E+08 | 1.06E+08 | 968  | 835  | 106400000 | 0.140859 | 0.023093618 |
| chr9 | 1.06E+08 | 1.07E+08 | 1017 | 886  | 106450000 | 0.126569 | 0.036540213 |
| chr9 | 1.06E+08 | 1.07E+08 | 993  | 792  | 106500000 | 0.253922 | 0.000175381 |
| chr9 | 1.07E+08 | 1.07E+08 | 1007 | 812  | 106550000 | 0.23814  | 0.000396163 |
| chr9 | 1.07E+08 | 1.07E+08 | 975  | 829  | 106600000 | 0.161658 | 0.011120611 |
| chr9 | 1.07E+08 | 1.07E+08 | 1036 | 846  | 106650000 | 0.219923 | 0.000961702 |
| chr9 | 1.07E+08 | 1.07E+08 | 1098 | 959  | 106700000 | 0.122904 | 0.040874063 |
| chr9 | 1.07E+08 | 1.07E+08 | 945  | 805  | 107250000 | 0.158954 | 0.012281076 |
| chr9 | 1.07E+08 | 1.07E+08 | 987  | 865  | 107300000 | 0.117978 | 0.047346567 |
| chr9 | 1.08E+08 | 1.08E+08 | 990  | 1022 | 107550000 | -0.11827 | 0.046609841 |
| chr9 | 1.08E+08 | 1.08E+08 | 979  | 1063 | 107600000 | -0.19113 | 0.003379264 |
| chr9 | 1.08E+08 | 1.08E+08 | 971  | 1002 | 108050000 | -0.11771 | 0.047382292 |
| chr9 | 1.08E+08 | 1.08E+08 | 916  | 948  | 108200000 | -0.12191 | 0.041789371 |
| chr9 | 1.08E+08 | 1.08E+08 | 763  | 650  | 108300000 | 0.158872 | 0.012317939 |
| chr9 | 1.08E+08 | 1.08E+08 | 915  | 799  | 108350000 | 0.123204 | 0.040503222 |
| chr9 | 1.09E+08 | 1.09E+08 | 1044 | 911  | 109100000 | 0.124227 | 0.039263502 |
| chr9 | 1.09E+08 | 1.09E+08 | 1073 | 903  | 109150000 | 0.17648  | 0.006310644 |
| chr9 | 1.09E+08 | 1.09E+08 | 1057 | 892  | 109200000 | 0.172488 | 0.00737878  |
| chr9 | 1.1E+08  | 1.1E+08  | 1014 | 870  | 110350000 | 0.148599 | 0.017749877 |
| chr9 | 1.11E+08 | 1.11E+08 | 928  | 958  | 110550000 | -0.11827 | 0.046601436 |
| chr9 | 1.11E+08 | 1.12E+08 | 874  | 958  | 111500000 | -0.20476 | 0.001863032 |
| chr9 | 1.12E+08 | 1.12E+08 | 970  | 1001 | 111550000 | -0.11776 | 0.047317915 |
| chr9 | 1.12E+08 | 1.12E+08 | 1021 | 874  | 111700000 | 0.151906 | 0.015811849 |
| chr9 | 1.12E+08 | 1.13E+08 | 969  | 1048 | 112500000 | -0.18544 | 0.004290593 |
| chr9 | 1.13E+08 | 1.13E+08 | 981  | 1087 | 112550000 | -0.2204  | 0.000903374 |
| chr9 | 1.13E+08 | 1.13E+08 | 963  | 1009 | 112600000 | -0.13969 | 0.023739004 |
| chr9 | 1.13E+08 | 1.13E+08 | 831  | 857  | 113200000 | -0.11682 | 0.048645066 |
| chr9 | 1.13E+08 | 1.13E+08 | 919  | 780  | 113400000 | 0.164219 | 0.010111297 |
| chr9 | 1.14E+08 | 1.14E+08 | 1017 | 870  | 113900000 | 0.152861 | 0.015287465 |

|      |          |          |      |      |           |          |             |
|------|----------|----------|------|------|-----------|----------|-------------|
| chr9 | 1.14E+08 | 1.15E+08 | 965  | 825  | 114450000 | 0.153763 | 0.014805626 |
| chr9 | 1.14E+08 | 1.15E+08 | 1020 | 837  | 114500000 | 0.212898 | 0.001333077 |
| chr9 | 1.15E+08 | 1.15E+08 | 985  | 841  | 114550000 | 0.155646 | 0.013842254 |
| chr9 | 1.15E+08 | 1.15E+08 | 979  | 840  | 114650000 | 0.148548 | 0.017781174 |
| chr9 | 1.15E+08 | 1.15E+08 | 982  | 840  | 114950000 | 0.152962 | 0.0152327   |
| chr9 | 1.15E+08 | 1.15E+08 | 1004 | 851  | 1.15E+08  | 0.166156 | 0.009401817 |
| chr9 | 1.15E+08 | 1.15E+08 | 1003 | 856  | 115300000 | 0.156267 | 0.013536694 |
| chr9 | 1.16E+08 | 1.16E+08 | 654  | 738  | 115800000 | -0.2467  | 0.000242228 |
| chr9 | 1.16E+08 | 1.16E+08 | 945  | 823  | 1.16E+08  | 0.12705  | 0.036000829 |
| chr9 | 1.16E+08 | 1.16E+08 | 1083 | 1146 | 116300000 | -0.15395 | 0.014494666 |
| chr9 | 1.16E+08 | 1.16E+08 | 1052 | 1185 | 116350000 | -0.24412 | 0.000277087 |
| chr9 | 1.16E+08 | 1.16E+08 | 1038 | 1155 | 116400000 | -0.22646 | 0.000674423 |
| chr9 | 1.16E+08 | 1.17E+08 | 977  | 1078 | 116450000 | -0.2143  | 0.001204418 |
| chr9 | 1.17E+08 | 1.17E+08 | 1126 | 1260 | 116900000 | -0.23459 | 0.000450962 |
| chr9 | 1.17E+08 | 1.17E+08 | 1091 | 1290 | 116950000 | -0.31409 | 4.75E-06    |
| chr9 | 1.17E+08 | 1.17E+08 | 1098 | 1218 | 1.17E+08  | -0.22201 | 0.000836443 |
| chr9 | 1.17E+08 | 1.17E+08 | 935  | 1001 | 117100000 | -0.17078 | 0.007730705 |
| chr9 | 1.17E+08 | 1.17E+08 | 1064 | 1167 | 117150000 | -0.20568 | 0.001787988 |
| chr9 | 1.17E+08 | 1.17E+08 | 1039 | 1137 | 117200000 | -0.20241 | 0.002069863 |
| chr9 | 1.17E+08 | 1.17E+08 | 1044 | 915  | 117300000 | 0.117906 | 0.047446814 |
| chr9 | 1.18E+08 | 1.18E+08 | 1088 | 945  | 117950000 | 0.130921 | 0.031893281 |
| chr9 | 1.18E+08 | 1.18E+08 | 1147 | 1005 | 1.18E+08  | 0.118298 | 0.046902489 |
| chr9 | 1.18E+08 | 1.18E+08 | 921  | 966  | 118150000 | -0.14119 | 0.022573295 |
| chr9 | 1.18E+08 | 1.18E+08 | 1108 | 930  | 118350000 | 0.180283 | 0.005423272 |
| chr9 | 1.18E+08 | 1.18E+08 | 1152 | 948  | 118400000 | 0.20881  | 0.001605679 |
| chr9 | 1.19E+08 | 1.19E+08 | 1068 | 928  | 118550000 | 0.130343 | 0.03248019  |
| chr9 | 1.19E+08 | 1.19E+08 | 1002 | 849  | 118600000 | 0.166674 | 0.009219761 |
| chr9 | 1.19E+08 | 1.19E+08 | 1004 | 863  | 118650000 | 0.145955 | 0.019441948 |
| chr9 | 1.2E+08  | 1.2E+08  | 1110 | 973  | 119900000 | 0.117676 | 0.047768824 |
| chr9 | 1.2E+08  | 1.2E+08  | 1080 | 1114 | 120150000 | -0.11709 | 0.048258577 |
| chr9 | 1.21E+08 | 1.21E+08 | 1039 | 908  | 120650000 | 0.12206  | 0.041928845 |
| chr9 | 1.21E+08 | 1.21E+08 | 1022 | 872  | 120800000 | 0.156623 | 0.013364047 |
| chr9 | 1.21E+08 | 1.21E+08 | 995  | 829  | 120850000 | 0.190953 | 0.003497697 |
| chr9 | 1.21E+08 | 1.21E+08 | 1047 | 892  | 120900000 | 0.158774 | 0.012361791 |
| chr9 | 1.21E+08 | 1.21E+08 | 1096 | 952  | 120950000 | 0.130843 | 0.031972052 |
| chr9 | 1.21E+08 | 1.21E+08 | 1021 | 882  | 121100000 | 0.138761 | 0.024757722 |
| chr9 | 1.22E+08 | 1.22E+08 | 1001 | 868  | 121700000 | 0.133303 | 0.029563513 |
| chr9 | 1.22E+08 | 1.22E+08 | 1122 | 966  | 122050000 | 0.143606 | 0.021059202 |
| chr9 | 1.22E+08 | 1.22E+08 | 1040 | 910  | 122350000 | 0.120273 | 0.044234652 |
| chr9 | 1.23E+08 | 1.23E+08 | 1054 | 1108 | 122700000 | -0.14445 | 0.020210489 |
| chr9 | 1.23E+08 | 1.23E+08 | 1052 | 1173 | 122750000 | -0.22944 | 0.000582669 |
| chr9 | 1.24E+08 | 1.24E+08 | 904  | 949  | 124200000 | -0.14246 | 0.021631623 |
| chr9 | 1.24E+08 | 1.24E+08 | 828  | 938  | 124250000 | -0.25233 | 0.000179879 |
| chr9 | 1.24E+08 | 1.24E+08 | 844  | 964  | 124300000 | -0.26416 | 9.45E-05    |
| chr9 | 1.24E+08 | 1.24E+08 | 932  | 1049 | 124350000 | -0.24298 | 0.000293944 |
| chr9 | 1.24E+08 | 1.24E+08 | 1010 | 1080 | 124400000 | -0.16905 | 0.008265076 |
| chr9 | 1.24E+08 | 1.25E+08 | 1127 | 1199 | 124450000 | -0.16172 | 0.01091127  |

|      |          |          |      |      |           |          |             |
|------|----------|----------|------|------|-----------|----------|-------------|
| chr9 | 1.24E+08 | 1.25E+08 | 1172 | 1249 | 124500000 | -0.16417 | 0.00995213  |
| chr9 | 1.25E+08 | 1.25E+08 | 1035 | 1078 | 124650000 | -0.1311  | 0.031414813 |
| chr9 | 1.25E+08 | 1.25E+08 | 979  | 1034 | 124800000 | -0.15123 | 0.015968431 |
| chr9 | 1.25E+08 | 1.25E+08 | 1041 | 1116 | 124850000 | -0.17274 | 0.007160676 |
| chr9 | 1.25E+08 | 1.25E+08 | 1064 | 1167 | 124900000 | -0.20568 | 0.001787988 |
| chr9 | 1.25E+08 | 1.25E+08 | 1075 | 1161 | 124950000 | -0.1834  | 0.004667224 |
| chr9 | 1.25E+08 | 1.25E+08 | 977  | 1008 | 125150000 | -0.11744 | 0.047767293 |
| chr9 | 1.25E+08 | 1.25E+08 | 901  | 755  | 125350000 | 0.182679 | 0.004923231 |
| chr9 | 1.26E+08 | 1.26E+08 | 917  | 961  | 126050000 | -0.13999 | 0.02350541  |
| chr9 | 1.26E+08 | 1.26E+08 | 1011 | 1114 | 126100000 | -0.21234 | 0.001319189 |
| chr9 | 1.26E+08 | 1.26E+08 | 1066 | 1210 | 126150000 | -0.25517 | 0.000154441 |
| chr9 | 1.26E+08 | 1.26E+08 | 1003 | 1079 | 126200000 | -0.17775 | 0.005871937 |
| chr9 | 1.26E+08 | 1.26E+08 | 982  | 1083 | 126250000 | -0.21361 | 0.001243631 |
| chr9 | 1.26E+08 | 1.26E+08 | 1022 | 1075 | 126300000 | -0.14531 | 0.019624629 |
| chr9 | 1.27E+08 | 1.27E+08 | 1022 | 896  | 126550000 | 0.117453 | 0.048083151 |
| chr9 | 1.27E+08 | 1.27E+08 | 1050 | 875  | 126600000 | 0.190663 | 0.003540577 |
| chr9 | 1.27E+08 | 1.27E+08 | 998  | 857  | 126650000 | 0.147373 | 0.018518089 |
| chr9 | 1.27E+08 | 1.27E+08 | 999  | 1049 | 126750000 | -0.14283 | 0.021360186 |
| chr9 | 1.27E+08 | 1.27E+08 | 977  | 1112 | 126800000 | -0.2591  | 0.000124813 |
| chr9 | 1.27E+08 | 1.27E+08 | 977  | 1062 | 126850000 | -0.19273 | 0.003157585 |
| chr9 | 1.27E+08 | 1.27E+08 | 1113 | 1190 | 127100000 | -0.16888 | 0.008318746 |
| chr9 | 1.27E+08 | 1.27E+08 | 1002 | 1091 | 127150000 | -0.19514 | 0.002846342 |
| chr9 | 1.27E+08 | 1.27E+08 | 983  | 1090 | 127200000 | -0.22144 | 0.000859662 |
| chr9 | 1.27E+08 | 1.27E+08 | 1085 | 1256 | 127250000 | -0.28351 | 3.12E-05    |
| chr9 | 1.27E+08 | 1.27E+08 | 1078 | 1132 | 127300000 | -0.14289 | 0.021317719 |
| chr9 | 1.28E+08 | 1.28E+08 | 924  | 802  | 127700000 | 0.131919 | 0.030899271 |
| chr9 | 1.28E+08 | 1.28E+08 | 1018 | 871  | 128350000 | 0.152621 | 0.015417551 |
| chr9 | 1.29E+08 | 1.29E+08 | 1001 | 1058 | 128750000 | -0.15227 | 0.015388826 |
| chr9 | 1.29E+08 | 1.29E+08 | 964  | 1050 | 128800000 | -0.19566 | 0.002783596 |
| chr9 | 1.29E+08 | 1.29E+08 | 1025 | 1110 | 128850000 | -0.18731 | 0.003970073 |
| chr9 | 1.29E+08 | 1.29E+08 | 1123 | 1192 | 129150000 | -0.1584  | 0.012333992 |
| chr9 | 1.29E+08 | 1.29E+08 | 1053 | 1177 | 129200000 | -0.23298 | 0.000488783 |
| chr9 | 1.29E+08 | 1.29E+08 | 1034 | 1137 | 129250000 | -0.20937 | 0.001512264 |
| chr9 | 1.29E+08 | 1.29E+08 | 1016 | 1090 | 129350000 | -0.1738  | 0.006868418 |
| chr9 | 1.29E+08 | 1.29E+08 | 1099 | 1175 | 129400000 | -0.16884 | 0.008331121 |
| chr9 | 1.3E+08  | 1.3E+08  | 1075 | 1126 | 129950000 | -0.13924 | 0.024096242 |
| chr9 | 1.3E+08  | 1.3E+08  | 1085 | 1124 | 1.30E+08  | -0.12332 | 0.040039606 |
| chr9 | 1.3E+08  | 1.3E+08  | 915  | 951  | 130350000 | -0.12805 | 0.03459564  |
| chr9 | 1.3E+08  | 1.31E+08 | 980  | 1063 | 130500000 | -0.18966 | 0.003596678 |
| chr9 | 1.31E+08 | 1.31E+08 | 900  | 959  | 130550000 | -0.16398 | 0.010025503 |
| chr9 | 1.31E+08 | 1.31E+08 | 1011 | 1082 | 130650000 | -0.17029 | 0.007877916 |
| chr9 | 1.31E+08 | 1.31E+08 | 1083 | 1139 | 130700000 | -0.14511 | 0.019764533 |
| chr9 | 1.31E+08 | 1.31E+08 | 923  | 1003 | 130850000 | -0.19229 | 0.003216695 |
| chr9 | 1.31E+08 | 1.31E+08 | 1000 | 1064 | 130900000 | -0.16187 | 0.010848857 |
| chr9 | 1.31E+08 | 1.31E+08 | 899  | 953  | 1.31E+08  | -0.15653 | 0.013205382 |
| chr9 | 1.31E+08 | 1.31E+08 | 809  | 898  | 131200000 | -0.22295 | 0.000799506 |
| chr9 | 1.31E+08 | 1.31E+08 | 736  | 802  | 131250000 | -0.19627 | 0.002710733 |

|      |          |          |      |      |           |          |             |
|------|----------|----------|------|------|-----------|----------|-------------|
| chr9 | 1.31E+08 | 1.31E+08 | 1010 | 871  | 131350000 | 0.141239 | 0.022802762 |
| chr9 | 1.31E+08 | 1.32E+08 | 742  | 792  | 131450000 | -0.16645 | 0.009128739 |
| chr9 | 1.31E+08 | 1.32E+08 | 813  | 842  | 131500000 | -0.12294 | 0.04050862  |
| chr9 | 1.32E+08 | 1.32E+08 | 847  | 881  | 131700000 | -0.12915 | 0.033413442 |
| chr9 | 1.32E+08 | 1.32E+08 | 893  | 947  | 131850000 | -0.15708 | 0.012944286 |
| chr9 | 1.32E+08 | 1.32E+08 | 952  | 1051 | 132050000 | -0.2151  | 0.00116014  |
| chr9 | 1.32E+08 | 1.32E+08 | 964  | 1011 | 132100000 | -0.14105 | 0.022682869 |
| chr9 | 1.32E+08 | 1.32E+08 | 1039 | 1100 | 132150000 | -0.15468 | 0.014117407 |
| chr9 | 1.32E+08 | 1.32E+08 | 1064 | 1186 | 132200000 | -0.22898 | 0.000596096 |
| chr9 | 1.32E+08 | 1.32E+08 | 998  | 1054 | 132250000 | -0.15113 | 0.016020639 |
| chr9 | 1.32E+08 | 1.32E+08 | 975  | 1057 | 132350000 | -0.18887 | 0.003717888 |
| chr9 | 1.32E+08 | 1.32E+08 | 1041 | 1164 | 132400000 | -0.23349 | 0.00047643  |
| chr9 | 1.32E+08 | 1.33E+08 | 1017 | 1093 | 132450000 | -0.17635 | 0.006209639 |
| chr9 | 1.32E+08 | 1.33E+08 | 901  | 978  | 132500000 | -0.19068 | 0.003444905 |
| chr9 | 1.33E+08 | 1.33E+08 | 896  | 935  | 132550000 | -0.13384 | 0.028768901 |
| chr9 | 1.33E+08 | 1.33E+08 | 910  | 965  | 132600000 | -0.15703 | 0.012964027 |
| chr9 | 1.33E+08 | 1.33E+08 | 982  | 1030 | 132950000 | -0.14122 | 0.022552528 |
| chr9 | 1.33E+08 | 1.33E+08 | 733  | 762  | 133050000 | -0.12835 | 0.034267231 |
| chr9 | 1.33E+08 | 1.33E+08 | 257  | 290  | 133100000 | -0.24666 | 0.000242808 |
| chr9 | 1.33E+08 | 1.33E+08 | 320  | 335  | 133200000 | -0.13846 | 0.024729386 |
| chr9 | 1.33E+08 | 1.33E+08 | 824  | 913  | 133250000 | -0.22034 | 0.000905806 |
| chr9 | 1.33E+08 | 1.33E+08 | 1013 | 1203 | 133300000 | -0.32037 | 3.16E-06    |
| chr9 | 1.33E+08 | 1.33E+08 | 948  | 1138 | 133350000 | -0.33591 | 1.12E-06    |
| chr9 | 1.33E+08 | 1.33E+08 | 895  | 938  | 133400000 | -0.14007 | 0.023438315 |
| chr9 | 1.34E+08 | 1.34E+08 | 943  | 816  | 133650000 | 0.136317 | 0.026821618 |
| chr9 | 1.34E+08 | 1.34E+08 | 984  | 1054 | 133750000 | -0.17152 | 0.007511033 |
| chr9 | 1.34E+08 | 1.34E+08 | 1066 | 1237 | 133800000 | -0.28701 | 2.54E-05    |
| chr9 | 1.34E+08 | 1.34E+08 | 1034 | 1231 | 133850000 | -0.32397 | 2.50E-06    |
| chr9 | 1.34E+08 | 1.34E+08 | 950  | 1093 | 133900000 | -0.27467 | 5.22E-05    |
| chr9 | 1.34E+08 | 1.34E+08 | 932  | 985  | 133950000 | -0.15217 | 0.015445774 |
| chr9 | 1.34E+08 | 1.34E+08 | 965  | 1004 | 134150000 | -0.12953 | 0.033016897 |
| chr9 | 1.34E+08 | 1.34E+08 | 808  | 851  | 134200000 | -0.14718 | 0.018403166 |
| chr9 | 1.34E+08 | 1.34E+08 | 855  | 904  | 134300000 | -0.15277 | 0.015116878 |
| chr9 | 1.34E+08 | 1.34E+08 | 1026 | 1061 | 134350000 | -0.12077 | 0.043258809 |
| chr9 | 1.34E+08 | 1.35E+08 | 964  | 1030 | 134450000 | -0.16791 | 0.008634162 |
| chr9 | 1.34E+08 | 1.35E+08 | 1078 | 1120 | 134500000 | -0.12751 | 0.03517625  |
| chr9 | 1.35E+08 | 1.35E+08 | 968  | 1009 | 134550000 | -0.13222 | 0.030309556 |
| chr9 | 1.35E+08 | 1.35E+08 | 872  | 940  | 134600000 | -0.1807  | 0.005211127 |
| chr9 | 1.35E+08 | 1.35E+08 | 959  | 1053 | 134650000 | -0.20727 | 0.001663509 |
| chr9 | 1.35E+08 | 1.35E+08 | 1042 | 1199 | 134700000 | -0.27485 | 5.17E-05    |
| chr9 | 1.35E+08 | 1.35E+08 | 1034 | 1104 | 134750000 | -0.16688 | 0.008982844 |
| chr9 | 1.35E+08 | 1.35E+08 | 976  | 1044 | 134950000 | -0.16954 | 0.008109484 |
| chr9 | 1.35E+08 | 1.35E+08 | 945  | 984  | 1.35E+08  | -0.13072 | 0.031799489 |
| chr9 | 1.35E+08 | 1.35E+08 | 1023 | 1089 | 135050000 | -0.16257 | 0.010569222 |
| chr9 | 1.35E+08 | 1.35E+08 | 1011 | 1113 | 135100000 | -0.21104 | 0.001400451 |
| chr9 | 1.35E+08 | 1.35E+08 | 991  | 1070 | 135350000 | -0.18303 | 0.004740114 |
| chr9 | 1.35E+08 | 1.35E+08 | 996  | 1115 | 135400000 | -0.2352  | 0.000437359 |

|      |          |          |      |      |           |          |             |
|------|----------|----------|------|------|-----------|----------|-------------|
| chr9 | 1.35E+08 | 1.36E+08 | 1018 | 1131 | 135450000 | -0.22423 | 0.000751405 |
| chr9 | 1.35E+08 | 1.36E+08 | 1087 | 1142 | 135500000 | -0.14358 | 0.020820966 |
| chr9 | 1.36E+08 | 1.36E+08 | 977  | 1027 | 135700000 | -0.14438 | 0.020263966 |
| chr9 | 1.36E+08 | 1.36E+08 | 974  | 1083 | 135750000 | -0.22541 | 0.000709685 |
| chr9 | 1.36E+08 | 1.36E+08 | 986  | 1073 | 135800000 | -0.19436 | 0.002943437 |
| chr9 | 1.36E+08 | 1.36E+08 | 950  | 1013 | 135850000 | -0.16501 | 0.009643794 |
| chr9 | 1.36E+08 | 1.36E+08 | 877  | 976  | 135900000 | -0.22668 | 0.000667291 |
| chr9 | 1.36E+08 | 1.36E+08 | 876  | 958  | 135950000 | -0.20147 | 0.002158241 |
| chr9 | 1.36E+08 | 1.36E+08 | 977  | 1081 | 1.36E+08  | -0.21831 | 0.000997713 |
| chr9 | 1.36E+08 | 1.36E+08 | 924  | 1011 | 136050000 | -0.20219 | 0.002090055 |
| chr9 | 1.36E+08 | 1.36E+08 | 848  | 926  | 136100000 | -0.19932 | 0.002372655 |
| chr9 | 1.36E+08 | 1.36E+08 | 806  | 967  | 136150000 | -0.33511 | 1.18E-06    |
| chr9 | 1.36E+08 | 1.36E+08 | 903  | 1100 | 136200000 | -0.35708 | 2.56E-07    |
| chr9 | 1.36E+08 | 1.36E+08 | 1013 | 1231 | 136250000 | -0.35357 | 3.29E-07    |
| chr9 | 1.36E+08 | 1.36E+08 | 1008 | 1221 | 136300000 | -0.34894 | 4.56E-07    |
| chr9 | 1.36E+08 | 1.36E+08 | 1115 | 1305 | 136350000 | -0.29938 | 1.20E-05    |
| chr9 | 1.36E+08 | 1.36E+08 | 1172 | 1304 | 136400000 | -0.22634 | 0.00067822  |
| chr9 | 1.36E+08 | 1.37E+08 | 1135 | 1247 | 136450000 | -0.20814 | 0.001599307 |
| chr9 | 1.36E+08 | 1.37E+08 | 1063 | 1214 | 136500000 | -0.264   | 9.53E-05    |
| chr9 | 1.37E+08 | 1.37E+08 | 1065 | 1231 | 136550000 | -0.28135 | 3.55E-05    |
| chr9 | 1.37E+08 | 1.37E+08 | 1034 | 1116 | 136600000 | -0.18247 | 0.004848733 |
| chr9 | 1.37E+08 | 1.37E+08 | 1026 | 1139 | 136650000 | -0.22311 | 0.000793319 |
| chr9 | 1.37E+08 | 1.37E+08 | 1102 | 1306 | 136700000 | -0.3174  | 3.83E-06    |
| chr9 | 1.37E+08 | 1.37E+08 | 1101 | 1274 | 136750000 | -0.28292 | 3.23E-05    |
| chr9 | 1.37E+08 | 1.37E+08 | 1063 | 1212 | 136800000 | -0.26162 | 0.000108699 |
| chr9 | 1.37E+08 | 1.37E+08 | 962  | 1086 | 136850000 | -0.24729 | 0.000234909 |
| chr9 | 1.37E+08 | 1.37E+08 | 914  | 1056 | 136900000 | -0.28072 | 3.68E-05    |
| chr9 | 1.37E+08 | 1.37E+08 | 829  | 926  | 136950000 | -0.23201 | 0.00051297  |
| chr9 | 1.37E+08 | 1.37E+08 | 777  | 867  | 1.37E+08  | -0.23049 | 0.00055324  |
| chr9 | 1.37E+08 | 1.37E+08 | 506  | 593  | 137050000 | -0.30127 | 1.07E-05    |
| chr9 | 1.37E+08 | 1.37E+08 | 684  | 725  | 137100000 | -0.15636 | 0.013287335 |
| chr9 | 1.37E+08 | 1.37E+08 | 1159 | 1255 | 137150000 | -0.18718 | 0.003991518 |
| chr9 | 1.37E+08 | 1.37E+08 | 1150 | 1350 | 137200000 | -0.3037  | 9.17E-06    |
| chr9 | 1.37E+08 | 1.37E+08 | 1168 | 1441 | 137250000 | -0.3754  | 6.69E-08    |
| chr9 | 1.37E+08 | 1.37E+08 | 1180 | 1455 | 137300000 | -0.3746  | 7.10E-08    |
| chr9 | 1.37E+08 | 1.37E+08 | 1116 | 1287 | 137350000 | -0.27805 | 4.30E-05    |
| chr9 | 1.37E+08 | 1.37E+08 | 1034 | 1074 | 137400000 | -0.12713 | 0.03559998  |
| chr9 | 1.37E+08 | 1.38E+08 | 998  | 1040 | 137450000 | -0.13184 | 0.030676107 |
| chr9 | 1.37E+08 | 1.38E+08 | 1028 | 1125 | 137500000 | -0.20246 | 0.002065435 |
| chr9 | 1.38E+08 | 1.38E+08 | 1119 | 1206 | 137550000 | -0.18039 | 0.005277682 |
| chr9 | 1.38E+08 | 1.38E+08 | 1195 | 1279 | 137600000 | -0.17038 | 0.007851046 |
| chr9 | 1.38E+08 | 1.38E+08 | 1156 | 1377 | 137650000 | -0.32476 | 2.37E-06    |
| chr9 | 1.38E+08 | 1.38E+08 | 1039 | 1378 | 137700000 | -0.47975 | 1.14E-11    |
| chr9 | 1.38E+08 | 1.38E+08 | 1018 | 1216 | 137750000 | -0.32878 | 1.81E-06    |
| chr9 | 1.38E+08 | 1.38E+08 | 999  | 1112 | 137800000 | -0.22697 | 0.000657716 |
| chr9 | 1.38E+08 | 1.38E+08 | 1022 | 1190 | 137850000 | -0.29194 | 1.89E-05    |
| chr9 | 1.38E+08 | 1.38E+08 | 1054 | 1206 | 137900000 | -0.26673 | 8.19E-05    |

|      |          |          |      |      |           |          |             |
|------|----------|----------|------|------|-----------|----------|-------------|
| chr9 | 1.38E+08 | 1.38E+08 | 1097 | 1264 | 137950000 | -0.2768  | 4.62E-05    |
| chr9 | 1.38E+08 | 1.38E+08 | 1180 | 1247 | 1.38E+08  | -0.15205 | 0.015511321 |
| chr9 | 1.38E+08 | 1.38E+08 | 1110 | 1189 | 138100000 | -0.17156 | 0.007498048 |
| chr9 | 1.38E+08 | 1.38E+08 | 1070 | 1302 | 138150000 | -0.35549 | 2.86E-07    |
| chr9 | 1.38E+08 | 1.38E+08 | 995  | 1264 | 138200000 | -0.4176  | 2.47E-09    |
| chr9 | 1.38E+08 | 1.38E+08 | 1020 | 1186 | 138250000 | -0.28991 | 2.13E-05    |
| chr9 | 1.38E+08 | 1.38E+08 | 924  | 982  | 138300000 | -0.1602  | 0.011541678 |
| chr9 | 1.38E+08 | 1.38E+08 | 888  | 951  | 138350000 | -0.17126 | 0.00758718  |
| chr9 | 1.38E+08 | 1.38E+08 | 854  | 950  | 138400000 | -0.22606 | 0.000687532 |
| chr9 | 1.38E+08 | 1.39E+08 | 862  | 982  | 138450000 | -0.26041 | 0.000116188 |
| chr9 | 1.38E+08 | 1.39E+08 | 961  | 1149 | 138500000 | -0.33014 | 1.66E-06    |
| chr9 | 1.39E+08 | 1.39E+08 | 1004 | 1215 | 138550000 | -0.34757 | 5.02E-07    |
| chr9 | 1.39E+08 | 1.39E+08 | 1105 | 1370 | 138600000 | -0.3825  | 3.92E-08    |
| chr9 | 1.39E+08 | 1.39E+08 | 1137 | 1419 | 138650000 | -0.39201 | 1.89E-08    |
| chr9 | 1.39E+08 | 1.39E+08 | 1018 | 1192 | 138700000 | -0.30002 | 1.15E-05    |
| chr9 | 1.39E+08 | 1.39E+08 | 994  | 1026 | 138750000 | -0.11808 | 0.046861528 |
| chr9 | 1.39E+08 | 1.39E+08 | 1026 | 1070 | 138800000 | -0.13295 | 0.029604496 |
| chr9 | 1.39E+08 | 1.39E+08 | 984  | 1192 | 138850000 | -0.34903 | 4.53E-07    |
| chr9 | 1.39E+08 | 1.39E+08 | 816  | 990  | 138900000 | -0.35123 | 3.88E-07    |
| chr9 | 1.39E+08 | 1.39E+08 | 866  | 904  | 138950000 | -0.13433 | 0.028317806 |
| chr9 | 1.39E+08 | 1.39E+08 | 1115 | 1210 | 1.39E+08  | -0.19034 | 0.003495467 |
| chr9 | 1.39E+08 | 1.39E+08 | 1046 | 1232 | 139050000 | -0.30849 | 6.79E-06    |
| chr9 | 1.39E+08 | 1.39E+08 | 1001 | 1216 | 139100000 | -0.35307 | 3.40E-07    |
| chr9 | 1.39E+08 | 1.39E+08 | 697  | 811  | 139150000 | -0.29092 | 2.01E-05    |
| chr9 | 1.39E+08 | 1.39E+08 | 549  | 691  | 139200000 | -0.40425 | 7.24E-09    |
| chr9 | 1.39E+08 | 1.39E+08 | 912  | 1162 | 139250000 | -0.42188 | 1.74E-09    |
| chr9 | 1.39E+08 | 1.39E+08 | 983  | 1260 | 139300000 | -0.43053 | 8.47E-10    |
| chr9 | 1.39E+08 | 1.39E+08 | 951  | 1216 | 139350000 | -0.427   | 1.14E-09    |
| chr9 | 1.39E+08 | 1.39E+08 | 1058 | 1327 | 139400000 | -0.3992  | 1.08E-08    |
| chr9 | 1.39E+08 | 1.4E+08  | 1059 | 1413 | 139450000 | -0.48843 | 5.12E-12    |
| chr9 | 1.39E+08 | 1.4E+08  | 952  | 1288 | 139500000 | -0.50847 | 7.76E-13    |
| chr9 | 1.4E+08  | 1.4E+08  | 1018 | 1227 | 139550000 | -0.34177 | 7.51E-07    |
| chr9 | 1.4E+08  | 1.4E+08  | 1084 | 1239 | 139600000 | -0.26518 | 8.92E-05    |
| chr9 | 1.4E+08  | 1.4E+08  | 927  | 1047 | 139650000 | -0.24799 | 0.000226366 |
| chr9 | 1.4E+08  | 1.4E+08  | 842  | 1017 | 139700000 | -0.3448  | 6.08E-07    |
| chr9 | 1.4E+08  | 1.4E+08  | 873  | 1093 | 139750000 | -0.39661 | 1.32E-08    |
| chr9 | 1.4E+08  | 1.4E+08  | 905  | 1159 | 139800000 | -0.42926 | 9.42E-10    |
| chr9 | 1.4E+08  | 1.4E+08  | 977  | 1287 | 139850000 | -0.46995 | 2.77E-11    |
| chr9 | 1.4E+08  | 1.4E+08  | 1040 | 1399 | 139900000 | -0.50018 | 1.71E-12    |
| chr9 | 1.4E+08  | 1.4E+08  | 995  | 1297 | 139950000 | -0.45478 | 1.06E-10    |
| chr9 | 1.4E+08  | 1.4E+08  | 913  | 1089 | 1.40E+08  | -0.32669 | 2.08E-06    |
| chr9 | 1.4E+08  | 1.4E+08  | 1018 | 1212 | 140050000 | -0.32402 | 2.49E-06    |
| chr9 | 1.4E+08  | 1.4E+08  | 1089 | 1364 | 140100000 | -0.39721 | 1.26E-08    |
| chr9 | 1.4E+08  | 1.4E+08  | 964  | 1257 | 140150000 | -0.45525 | 1.02E-10    |
| chr9 | 1.4E+08  | 1.4E+08  | 937  | 1105 | 140200000 | -0.3103  | 6.05E-06    |
| chr9 | 1.4E+08  | 1.4E+08  | 974  | 1081 | 140250000 | -0.22274 | 0.000807351 |
| chr9 | 1.4E+08  | 1.4E+08  | 958  | 1141 | 140300000 | -0.32457 | 2.40E-06    |

|       |          |          |      |      |           |          |             |
|-------|----------|----------|------|------|-----------|----------|-------------|
| chr9  | 1.4E+08  | 1.4E+08  | 996  | 1182 | 140350000 | -0.31938 | 3.37E-06    |
| chr9  | 1.4E+08  | 1.4E+08  | 929  | 1028 | 140400000 | -0.21846 | 0.000990481 |
| chr9  | 1.4E+08  | 1.41E+08 | 805  | 888  | 140450000 | -0.21394 | 0.001224542 |
| chr9  | 1.4E+08  | 1.41E+08 | 834  | 918  | 140500000 | -0.21082 | 0.001414945 |
| chr9  | 1.41E+08 | 1.41E+08 | 893  | 950  | 140550000 | -0.16164 | 0.010942513 |
| chr9  | 1.41E+08 | 1.41E+08 | 1024 | 1102 | 140650000 | -0.17828 | 0.005747165 |
| chr9  | 1.41E+08 | 1.41E+08 | 924  | 1001 | 140700000 | -0.18785 | 0.003881164 |
| chr9  | 1.41E+08 | 1.41E+08 | 1025 | 1071 | 140900000 | -0.13571 | 0.02707533  |
| chr9  | 1.41E+08 | 1.41E+08 | 1064 | 1173 | 140950000 | -0.21308 | 0.00127482  |
| chr9  | 1.41E+08 | 1.41E+08 | 775  | 859  | 1.41E+08  | -0.22083 | 0.000884814 |
| chr9  | 1.41E+08 | 1.41E+08 | 310  | 347  | 141050000 | -0.23504 | 0.000440864 |
| chr9  | 1.41E+08 | 1.41E+08 | 75   | 88   | 141100000 | -0.30298 | 9.59E-06    |
| chr13 | 19000001 | 19100000 | 20   | 14   | 19050000  | 0.442201 | 4.22E-10    |
| chr13 | 19050001 | 19150000 | 20   | 15   | 19100000  | 0.342666 | 8.12E-07    |
| chr13 | 19250001 | 19350000 | 160  | 137  | 19300000  | 0.151524 | 0.016025781 |
| chr13 | 19300001 | 19400000 | 154  | 131  | 19350000  | 0.160992 | 0.011397363 |
| chr13 | 19400001 | 19500000 | 264  | 313  | 19450000  | -0.318   | 3.69E-06    |
| chr13 | 19450001 | 19550000 | 656  | 758  | 19500000  | -0.28087 | 3.65E-05    |
| chr13 | 19500001 | 19600000 | 927  | 1032 | 19550000  | -0.22717 | 0.000651268 |
| chr13 | 19600001 | 19700000 | 883  | 913  | 19650000  | -0.12057 | 0.043509799 |
| chr13 | 19650001 | 19750000 | 849  | 897  | 19700000  | -0.15172 | 0.015694745 |
| chr13 | 19700001 | 19800000 | 719  | 617  | 19750000  | 0.14835  | 0.017903727 |
| chr13 | 20000001 | 20100000 | 183  | 204  | 20050000  | -0.2291  | 0.000592595 |
| chr13 | 20450001 | 20550000 | 868  | 680  | 20500000  | 0.279789 | 4.20E-05    |
| chr13 | 20500001 | 20600000 | 937  | 792  | 20550000  | 0.170177 | 0.00806763  |
| chr13 | 20600001 | 20700000 | 914  | 946  | 20650000  | -0.12202 | 0.041654768 |
| chr13 | 20650001 | 20750000 | 972  | 1002 | 20700000  | -0.11623 | 0.049498002 |
| chr13 | 20800001 | 20900000 | 1055 | 921  | 20850000  | 0.123598 | 0.040022169 |
| chr13 | 21050001 | 21150000 | 895  | 782  | 21100000  | 0.122347 | 0.041566883 |
| chr13 | 21100001 | 21200000 | 916  | 767  | 21150000  | 0.183749 | 0.004713379 |
| chr13 | 21150001 | 21250000 | 1009 | 851  | 21200000  | 0.173323 | 0.007142901 |
| chr13 | 21250001 | 21350000 | 998  | 868  | 21300000  | 0.128973 | 0.033908808 |
| chr13 | 21850001 | 21950000 | 769  | 794  | 21900000  | -0.11853 | 0.046250883 |
| chr13 | 22100001 | 22200000 | 881  | 920  | 22150000  | -0.13486 | 0.027829186 |
| chr13 | 22150001 | 22250000 | 945  | 989  | 22200000  | -0.13803 | 0.025086411 |
| chr13 | 23050001 | 23150000 | 934  | 778  | 23100000  | 0.191281 | 0.00344977  |
| chr13 | 23650001 | 23750000 | 917  | 802  | 23700000  | 0.120948 | 0.043352354 |
| chr13 | 24250001 | 24350000 | 968  | 1009 | 24300000  | -0.13222 | 0.030309556 |
| chr13 | 24300001 | 24400000 | 931  | 972  | 24350000  | -0.13455 | 0.028116978 |
| chr13 | 24350001 | 24450000 | 890  | 961  | 24400000  | -0.1831  | 0.004725113 |
| chr13 | 24400001 | 24500000 | 821  | 908  | 24450000  | -0.21768 | 0.001027673 |
| chr13 | 24550001 | 24650000 | 975  | 1012 | 24600000  | -0.12611 | 0.036749686 |
| chr13 | 24750001 | 24850000 | 1014 | 1057 | 24800000  | -0.13229 | 0.030241126 |
| chr13 | 25350001 | 25450000 | 924  | 797  | 25400000  | 0.140941 | 0.023030347 |
| chr13 | 25950001 | 26050000 | 1001 | 1043 | 2.60E+07  | -0.13167 | 0.030847857 |
| chr13 | 26000001 | 26100000 | 913  | 974  | 26050000  | -0.16568 | 0.009401373 |
| chr13 | 26400001 | 26500000 | 940  | 981  | 26450000  | -0.13396 | 0.028653049 |

|       |          |          |      |      |          |          |             |
|-------|----------|----------|------|------|----------|----------|-------------|
| chr13 | 26650001 | 26750000 | 951  | 832  | 26700000 | 0.12049  | 0.043949542 |
| chr13 | 26850001 | 26950000 | 1022 | 894  | 26900000 | 0.120677 | 0.043705205 |
| chr13 | 26900001 | 27000000 | 1076 | 911  | 26950000 | 0.167783 | 0.008840216 |
| chr13 | 26950001 | 27050000 | 1104 | 952  | 2.70E+07 | 0.141335 | 0.022729722 |
| chr13 | 27450001 | 27550000 | 1071 | 1123 | 27500000 | -0.14077 | 0.022895932 |
| chr13 | 28000001 | 28100000 | 928  | 1009 | 28050000 | -0.1931  | 0.003107175 |
| chr13 | 30050001 | 30150000 | 1078 | 1135 | 30100000 | -0.14671 | 0.018704303 |
| chr13 | 30100001 | 30200000 | 1061 | 1099 | 30150000 | -0.12314 | 0.040260311 |
| chr13 | 30150001 | 30250000 | 798  | 829  | 30200000 | -0.12736 | 0.035350426 |
| chr13 | 30650001 | 30750000 | 1037 | 1101 | 30700000 | -0.15877 | 0.012166719 |
| chr13 | 30700001 | 30800000 | 995  | 1049 | 30750000 | -0.14862 | 0.017502305 |
| chr13 | 30800001 | 30900000 | 932  | 816  | 30850000 | 0.119389 | 0.045413442 |
| chr13 | 31400001 | 31500000 | 1086 | 1169 | 31450000 | -0.17862 | 0.00566861  |
| chr13 | 31450001 | 31550000 | 1054 | 1091 | 31500000 | -0.12215 | 0.041490759 |
| chr13 | 31650001 | 31750000 | 1042 | 1076 | 31700000 | -0.11869 | 0.046021528 |
| chr13 | 31700001 | 31800000 | 985  | 1030 | 31750000 | -0.13682 | 0.026104975 |
| chr13 | 31950001 | 32050000 | 1011 | 876  | 3.20E+07 | 0.134408 | 0.028532001 |
| chr13 | 32000001 | 32100000 | 1030 | 845  | 32050000 | 0.213249 | 0.001311743 |
| chr13 | 32150001 | 32250000 | 872  | 756  | 32200000 | 0.13357  | 0.029311628 |
| chr13 | 32450001 | 32550000 | 1073 | 930  | 32500000 | 0.133976 | 0.028932279 |
| chr13 | 32800001 | 32900000 | 1033 | 893  | 32850000 | 0.137736 | 0.025605814 |
| chr13 | 32850001 | 32950000 | 1014 | 859  | 32900000 | 0.166956 | 0.009122072 |
| chr13 | 32900001 | 33000000 | 961  | 843  | 32950000 | 0.116632 | 0.049252221 |
| chr13 | 34000001 | 34100000 | 1049 | 913  | 34050000 | 0.127956 | 0.035002259 |
| chr13 | 34050001 | 34150000 | 1053 | 864  | 34100000 | 0.21303  | 0.001324991 |
| chr13 | 34100001 | 34200000 | 1002 | 865  | 34150000 | 0.139739 | 0.023969899 |
| chr13 | 34350001 | 34450000 | 1074 | 924  | 34400000 | 0.144657 | 0.020321616 |
| chr13 | 34400001 | 34500000 | 1056 | 918  | 34450000 | 0.129672 | 0.033173632 |
| chr13 | 34600001 | 34700000 | 998  | 1029 | 34650000 | -0.1165  | 0.049097767 |
| chr13 | 35300001 | 35400000 | 1013 | 846  | 35350000 | 0.187533 | 0.004034378 |
| chr13 | 35350001 | 35450000 | 1007 | 855  | 35400000 | 0.163696 | 0.010310817 |
| chr13 | 35400001 | 35500000 | 1041 | 905  | 35450000 | 0.129609 | 0.03323977  |
| chr13 | 35550001 | 35650000 | 790  | 693  | 35600000 | 0.116626 | 0.049261568 |
| chr13 | 35700001 | 35800000 | 1063 | 867  | 35750000 | 0.221666 | 0.000885665 |
| chr13 | 35750001 | 35850000 | 1080 | 914  | 35800000 | 0.168393 | 0.008637336 |
| chr13 | 35800001 | 35900000 | 941  | 815  | 35850000 | 0.135023 | 0.027971639 |
| chr13 | 35850001 | 35950000 | 967  | 846  | 35900000 | 0.120486 | 0.043954248 |
| chr13 | 35900001 | 36000000 | 972  | 833  | 35950000 | 0.150268 | 0.016747568 |
| chr13 | 35950001 | 36050000 | 910  | 784  | 3.60E+07 | 0.142641 | 0.021755666 |
| chr13 | 36050001 | 36150000 | 1039 | 903  | 36100000 | 0.130026 | 0.032806385 |
| chr13 | 37300001 | 37400000 | 966  | 1007 | 37350000 | -0.13234 | 0.030191836 |
| chr13 | 37600001 | 37700000 | 888  | 939  | 37650000 | -0.15294 | 0.01502703  |
| chr13 | 37850001 | 37950000 | 1033 | 896  | 37900000 | 0.132898 | 0.0299496   |
| chr13 | 38150001 | 38250000 | 1031 | 897  | 38200000 | 0.128493 | 0.034421752 |
| chr13 | 38300001 | 38400000 | 1049 | 886  | 38350000 | 0.171264 | 0.007736739 |
| chr13 | 38700001 | 38800000 | 1018 | 852  | 38750000 | 0.18444  | 0.004582177 |
| chr13 | 39000001 | 39100000 | 1021 | 891  | 39050000 | 0.124114 | 0.039399232 |



|       |          |          |      |      |          |          |             |
|-------|----------|----------|------|------|----------|----------|-------------|
| chr13 | 39250001 | 39350000 | 1038 | 908  | 39300000 | 0.12067  | 0.043713328 |
| chr13 | 39300001 | 39400000 | 1079 | 919  | 39350000 | 0.159186 | 0.012177313 |
| chr13 | 39350001 | 39450000 | 1088 | 937  | 39400000 | 0.143186 | 0.021360045 |
| chr13 | 39400001 | 39500000 | 1071 | 935  | 39450000 | 0.123548 | 0.040082672 |
| chr13 | 39850001 | 39950000 | 1048 | 874  | 39900000 | 0.189562 | 0.003707688 |
| chr13 | 39900001 | 40000000 | 1018 | 874  | 39950000 | 0.147661 | 0.018335229 |
| chr13 | 41350001 | 41450000 | 561  | 630  | 41400000 | -0.23972 | 0.000347636 |
| chr13 | 41450001 | 41550000 | 687  | 714  | 41500000 | -0.12799 | 0.03466031  |
| chr13 | 41500001 | 41600000 | 889  | 917  | 41550000 | -0.11711 | 0.048229612 |
| chr13 | 41600001 | 41700000 | 760  | 830  | 41650000 | -0.19948 | 0.00235562  |
| chr13 | 42000001 | 42100000 | 722  | 778  | 42050000 | -0.18014 | 0.005331115 |
| chr13 | 42100001 | 42200000 | 973  | 821  | 42150000 | 0.172686 | 0.007322309 |
| chr13 | 44000001 | 44100000 | 1024 | 886  | 44050000 | 0.136465 | 0.026692214 |
| chr13 | 45650001 | 45750000 | 936  | 800  | 45700000 | 0.154137 | 0.014609966 |
| chr13 | 45700001 | 45800000 | 990  | 852  | 45750000 | 0.144203 | 0.020637392 |
| chr13 | 45750001 | 45850000 | 953  | 823  | 45800000 | 0.139212 | 0.024391429 |
| chr13 | 46550001 | 46650000 | 1025 | 892  | 46600000 | 0.128137 | 0.034806199 |
| chr13 | 46600001 | 46700000 | 1061 | 889  | 46650000 | 0.182798 | 0.004899525 |
| chr13 | 46700001 | 46800000 | 941  | 1014 | 46750000 | -0.18016 | 0.005326861 |
| chr13 | 46950001 | 47050000 | 466  | 392  | 4.70E+07 | 0.177105 | 0.006156706 |
| chr13 | 47550001 | 47650000 | 1068 | 920  | 47600000 | 0.142834 | 0.021614794 |
| chr13 | 47950001 | 48050000 | 892  | 766  | 4.80E+07 | 0.147328 | 0.018547012 |
| chr13 | 48850001 | 48950000 | 1021 | 837  | 48900000 | 0.214312 | 0.001249154 |
| chr13 | 48900001 | 49000000 | 931  | 728  | 48950000 | 0.282471 | 3.60E-05    |
| chr13 | 49300001 | 49400000 | 991  | 1033 | 49350000 | -0.13226 | 0.030274531 |
| chr13 | 49350001 | 49450000 | 956  | 996  | 49400000 | -0.13151 | 0.031007963 |
| chr13 | 49700001 | 49800000 | 915  | 792  | 49750000 | 0.1359   | 0.027188096 |
| chr13 | 49900001 | 50000000 | 993  | 862  | 49950000 | 0.131734 | 0.031081279 |
| chr13 | 49950001 | 50050000 | 1006 | 832  | 5.00E+07 | 0.201603 | 0.002213244 |
| chr13 | 51100001 | 51200000 | 1002 | 1034 | 51150000 | -0.11773 | 0.047362181 |
| chr13 | 51400001 | 51500000 | 1013 | 849  | 51450000 | 0.182426 | 0.004973978 |
| chr13 | 51700001 | 51800000 | 903  | 959  | 51750000 | -0.15918 | 0.011986426 |
| chr13 | 51750001 | 51850000 | 1032 | 1102 | 51800000 | -0.16705 | 0.008922278 |
| chr13 | 51850001 | 51950000 | 1005 | 1070 | 51900000 | -0.16279 | 0.010483591 |
| chr13 | 51900001 | 52000000 | 971  | 1069 | 51950000 | -0.21109 | 0.001397357 |
| chr13 | 52600001 | 52700000 | 829  | 705  | 52650000 | 0.161377 | 0.011236667 |
| chr13 | 52650001 | 52750000 | 867  | 752  | 52700000 | 0.132928 | 0.02992116  |
| chr13 | 52750001 | 52850000 | 200  | 151  | 52800000 | 0.33308  | 1.55E-06    |
| chr13 | 52800001 | 52900000 | 110  | 115  | 52850000 | -0.1365  | 0.026379237 |
| chr13 | 52950001 | 53050000 | 942  | 796  | 5.30E+07 | 0.170587 | 0.007941434 |
| chr13 | 53000001 | 53100000 | 551  | 427  | 53050000 | 0.295444 | 1.67E-05    |
| chr13 | 53050001 | 53150000 | 100  | 66   | 53100000 | 0.52709  | 2.05E-13    |
| chr13 | 53350001 | 53450000 | 1019 | 1078 | 53400000 | -0.15357 | 0.014688449 |
| chr13 | 53400001 | 53500000 | 1002 | 1084 | 53450000 | -0.18585 | 0.004217861 |
| chr13 | 54700001 | 54800000 | 949  | 820  | 54750000 | 0.138412 | 0.025043317 |
| chr13 | 54750001 | 54850000 | 971  | 818  | 54800000 | 0.174999 | 0.006689884 |
| chr13 | 55100001 | 55200000 | 983  | 1020 | 55150000 | -0.12568 | 0.037241355 |

|       |          |          |      |     |          |          |             |
|-------|----------|----------|------|-----|----------|----------|-------------|
| chr13 | 55300001 | 55400000 | 1011 | 878 | 55350000 | 0.131118 | 0.03169422  |
| chr13 | 55400001 | 55500000 | 846  | 889 | 55450000 | -0.1439  | 0.020598702 |
| chr13 | 55700001 | 55800000 | 1017 | 879 | 55750000 | 0.138013 | 0.025374525 |
| chr13 | 55750001 | 55850000 | 1006 | 859 | 55800000 | 0.155528 | 0.013900816 |
| chr13 | 55800001 | 55900000 | 1047 | 853 | 55850000 | 0.223272 | 0.000820558 |
| chr13 | 56000001 | 56100000 | 1047 | 860 | 56050000 | 0.211481 | 0.001422338 |
| chr13 | 56050001 | 56150000 | 1087 | 874 | 56100000 | 0.242275 | 0.000321341 |
| chr13 | 56200001 | 56300000 | 983  | 848 | 56250000 | 0.140755 | 0.02317357  |
| chr13 | 56250001 | 56350000 | 1058 | 913 | 56300000 | 0.140281 | 0.023542238 |
| chr13 | 56450001 | 56550000 | 1021 | 879 | 56500000 | 0.143676 | 0.021009258 |
| chr13 | 56500001 | 56600000 | 1015 | 853 | 56550000 | 0.17849  | 0.005826783 |
| chr13 | 56650001 | 56750000 | 967  | 831 | 56700000 | 0.146296 | 0.019216491 |
| chr13 | 56750001 | 56850000 | 1010 | 879 | 56800000 | 0.128048 | 0.034901813 |
| chr13 | 56800001 | 56900000 | 1075 | 896 | 56850000 | 0.190394 | 0.003580679 |
| chr13 | 56850001 | 56950000 | 1059 | 859 | 56900000 | 0.229601 | 0.000604705 |
| chr13 | 56900001 | 57000000 | 1000 | 803 | 56950000 | 0.244156 | 0.000291861 |
| chr13 | 56950001 | 57050000 | 1046 | 802 | 5.70E+07 | 0.310837 | 6.51E-06    |
| chr13 | 57000001 | 57100000 | 1078 | 875 | 57050000 | 0.22863  | 0.000633964 |
| chr13 | 57050001 | 57150000 | 1022 | 872 | 57100000 | 0.156623 | 0.013364047 |
| chr13 | 57100001 | 57200000 | 997  | 789 | 57150000 | 0.265196 | 9.54E-05    |
| chr13 | 57150001 | 57250000 | 920  | 737 | 57200000 | 0.247597 | 0.00024437  |
| chr13 | 57200001 | 57300000 | 988  | 821 | 57250000 | 0.194757 | 0.002976968 |
| chr13 | 57250001 | 57350000 | 1009 | 855 | 57300000 | 0.166558 | 0.009260343 |
| chr13 | 57350001 | 57450000 | 977  | 844 | 57400000 | 0.138744 | 0.024771394 |
| chr13 | 57450001 | 57550000 | 1033 | 903 | 57500000 | 0.121671 | 0.04242257  |
| chr13 | 57500001 | 57600000 | 970  | 748 | 57550000 | 0.302575 | 1.09E-05    |
| chr13 | 57550001 | 57650000 | 960  | 760 | 57600000 | 0.264663 | 9.83E-05    |
| chr13 | 57600001 | 57700000 | 971  | 847 | 57650000 | 0.124738 | 0.038656171 |
| chr13 | 57850001 | 57950000 | 1035 | 880 | 57900000 | 0.161684 | 0.011110256 |
| chr13 | 58250001 | 58350000 | 1036 | 904 | 58300000 | 0.124258 | 0.039226917 |
| chr13 | 58500001 | 58600000 | 963  | 830 | 58550000 | 0.142053 | 0.022189999 |
| chr13 | 58550001 | 58650000 | 997  | 845 | 58600000 | 0.16627  | 0.009361492 |
| chr13 | 58600001 | 58700000 | 1065 | 905 | 58650000 | 0.162492 | 0.010782776 |
| chr13 | 58750001 | 58850000 | 1007 | 869 | 58800000 | 0.140264 | 0.023555748 |
| chr13 | 58900001 | 59000000 | 1049 | 903 | 58950000 | 0.143845 | 0.020889467 |
| chr13 | 58950001 | 59050000 | 1081 | 919 | 5.90E+07 | 0.161858 | 0.011038874 |
| chr13 | 59000001 | 59100000 | 947  | 813 | 59050000 | 0.147737 | 0.018286753 |
| chr13 | 59600001 | 59700000 | 1039 | 858 | 59650000 | 0.203774 | 0.002011201 |
| chr13 | 59850001 | 59950000 | 976  | 855 | 59900000 | 0.118585 | 0.046507211 |
| chr13 | 60250001 | 60350000 | 1096 | 896 | 60300000 | 0.218305 | 0.001037578 |
| chr13 | 60300001 | 60400000 | 1043 | 910 | 60350000 | 0.124429 | 0.03902235  |
| chr13 | 60500001 | 60600000 | 1057 | 913 | 60550000 | 0.138917 | 0.024630387 |
| chr13 | 60550001 | 60650000 | 1037 | 843 | 60600000 | 0.22644  | 0.000704918 |
| chr13 | 60600001 | 60700000 | 1072 | 927 | 60650000 | 0.137292 | 0.025981444 |
| chr13 | 60650001 | 60750000 | 1132 | 965 | 60700000 | 0.157901 | 0.012760333 |
| chr13 | 60700001 | 60800000 | 1070 | 933 | 60750000 | 0.12529  | 0.038007663 |
| chr13 | 61850001 | 61950000 | 950  | 797 | 61900000 | 0.180976 | 0.005274233 |

|       |          |          |      |     |          |          |             |
|-------|----------|----------|------|-----|----------|----------|-------------|
| chr13 | 62000001 | 62100000 | 1062 | 889 | 62050000 | 0.184157 | 0.004635643 |
| chr13 | 62050001 | 62150000 | 1031 | 840 | 62100000 | 0.223211 | 0.000822936 |
| chr13 | 62200001 | 62300000 | 1042 | 889 | 62250000 | 0.156728 | 0.013313625 |
| chr13 | 62500001 | 62600000 | 1023 | 864 | 62550000 | 0.171331 | 0.007716794 |
| chr13 | 62550001 | 62650000 | 1012 | 883 | 62600000 | 0.124352 | 0.039113865 |
| chr13 | 62750001 | 62850000 | 995  | 872 | 62800000 | 0.117997 | 0.047320883 |
| chr13 | 62850001 | 62950000 | 962  | 835 | 62900000 | 0.131889 | 0.030928683 |
| chr13 | 62900001 | 63000000 | 1009 | 885 | 62950000 | 0.116805 | 0.049003907 |
| chr13 | 63150001 | 63250000 | 1022 | 873 | 63200000 | 0.15497  | 0.014181802 |
| chr13 | 63200001 | 63300000 | 1073 | 918 | 63250000 | 0.152712 | 0.015367955 |
| chr13 | 63250001 | 63350000 | 997  | 849 | 63300000 | 0.159457 | 0.012057423 |
| chr13 | 63950001 | 64050000 | 976  | 850 | 6.40E+07 | 0.127047 | 0.036004835 |
| chr13 | 64200001 | 64300000 | 949  | 816 | 64250000 | 0.145467 | 0.019768808 |
| chr13 | 64250001 | 64350000 | 644  | 537 | 64300000 | 0.189767 | 0.003676031 |
| chr13 | 64350001 | 64450000 | 436  | 371 | 64400000 | 0.160537 | 0.011589527 |
| chr13 | 64400001 | 64500000 | 872  | 712 | 64450000 | 0.220079 | 0.00095464  |
| chr13 | 64450001 | 64550000 | 1051 | 850 | 64500000 | 0.233856 | 0.000490576 |
| chr13 | 64500001 | 64600000 | 1014 | 883 | 64550000 | 0.127201 | 0.03583345  |
| chr13 | 64600001 | 64700000 | 971  | 830 | 64650000 | 0.153988 | 0.014687483 |
| chr13 | 64700001 | 64800000 | 1039 | 879 | 64750000 | 0.168889 | 0.008475649 |
| chr13 | 64750001 | 64850000 | 1023 | 850 | 64800000 | 0.1949   | 0.002958892 |
| chr13 | 64800001 | 64900000 | 1047 | 905 | 64850000 | 0.1379   | 0.025468743 |
| chr13 | 64950001 | 65050000 | 1014 | 841 | 6.50E+07 | 0.197508 | 0.002645236 |
| chr13 | 65000001 | 65100000 | 1023 | 883 | 65050000 | 0.139949 | 0.023803287 |
| chr13 | 65300001 | 65400000 | 1003 | 874 | 65350000 | 0.126245 | 0.036908147 |
| chr13 | 65350001 | 65450000 | 986  | 812 | 65400000 | 0.207736 | 0.00168529  |
| chr13 | 65400001 | 65500000 | 1010 | 835 | 65450000 | 0.202135 | 0.00216207  |
| chr13 | 65450001 | 65550000 | 1053 | 848 | 65500000 | 0.239997 | 0.000360744 |
| chr13 | 65500001 | 65600000 | 929  | 777 | 65550000 | 0.185392 | 0.004406871 |
| chr13 | 65650001 | 65750000 | 1006 | 872 | 65700000 | 0.133858 | 0.029041474 |
| chr13 | 65800001 | 65900000 | 1020 | 861 | 65850000 | 0.172112 | 0.007487106 |
| chr13 | 66000001 | 66100000 | 912  | 792 | 66050000 | 0.131162 | 0.031650847 |
| chr13 | 66050001 | 66150000 | 985  | 833 | 66100000 | 0.169435 | 0.008300316 |
| chr13 | 66100001 | 66200000 | 959  | 839 | 66150000 | 0.120488 | 0.043951914 |
| chr13 | 66200001 | 66300000 | 996  | 862 | 66250000 | 0.136086 | 0.027023744 |
| chr13 | 66550001 | 66650000 | 967  | 841 | 66600000 | 0.129038 | 0.033839547 |
| chr13 | 66600001 | 66700000 | 1032 | 903 | 66650000 | 0.120273 | 0.044234652 |
| chr13 | 66650001 | 66750000 | 1009 | 884 | 66700000 | 0.118436 | 0.046711968 |
| chr13 | 67050001 | 67150000 | 1001 | 845 | 67100000 | 0.172047 | 0.007506069 |
| chr13 | 67100001 | 67200000 | 943  | 783 | 67150000 | 0.195874 | 0.002838033 |
| chr13 | 67300001 | 67400000 | 976  | 852 | 67350000 | 0.123656 | 0.039951962 |
| chr13 | 67350001 | 67450000 | 1042 | 862 | 67400000 | 0.201224 | 0.002250384 |
| chr13 | 67550001 | 67650000 | 1004 | 870 | 67600000 | 0.1343   | 0.028631697 |
| chr13 | 67900001 | 68000000 | 955  | 801 | 67950000 | 0.181327 | 0.005200162 |
| chr13 | 67950001 | 68050000 | 904  | 784 | 6.80E+07 | 0.133097 | 0.029759086 |
| chr13 | 68000001 | 68100000 | 962  | 810 | 68050000 | 0.175743 | 0.00649687  |
| chr13 | 68050001 | 68150000 | 1021 | 853 | 68100000 | 0.186993 | 0.004125472 |

|       |          |          |      |     |          |          |             |
|-------|----------|----------|------|-----|----------|----------|-------------|
| chr13 | 68100001 | 68200000 | 973  | 825 | 68150000 | 0.165674 | 0.009574305 |
| chr13 | 68150001 | 68250000 | 992  | 830 | 68200000 | 0.184857 | 0.004504697 |
| chr13 | 68700001 | 68800000 | 1046 | 887 | 68750000 | 0.165505 | 0.009635312 |
| chr13 | 68750001 | 68850000 | 1063 | 932 | 68800000 | 0.117368 | 0.048202927 |
| chr13 | 69000001 | 69100000 | 1007 | 863 | 69050000 | 0.150259 | 0.016752604 |
| chr13 | 69050001 | 69150000 | 981  | 838 | 69100000 | 0.154931 | 0.014201471 |
| chr13 | 69400001 | 69500000 | 1028 | 867 | 69450000 | 0.173365 | 0.007131434 |
| chr13 | 69450001 | 69550000 | 1008 | 855 | 69500000 | 0.165128 | 0.009772954 |
| chr13 | 69900001 | 70000000 | 998  | 837 | 69950000 | 0.18144  | 0.005176347 |
| chr13 | 69950001 | 70050000 | 951  | 816 | 7.00E+07 | 0.148504 | 0.017807906 |
| chr13 | 70000001 | 70100000 | 891  | 772 | 70050000 | 0.134453 | 0.028491232 |
| chr13 | 70250001 | 70350000 | 1029 | 892 | 70300000 | 0.133756 | 0.029137634 |
| chr13 | 70300001 | 70400000 | 1004 | 847 | 70350000 | 0.172954 | 0.007246467 |
| chr13 | 70400001 | 70500000 | 1029 | 870 | 70450000 | 0.169784 | 0.008190228 |
| chr13 | 70450001 | 70550000 | 1041 | 865 | 70500000 | 0.194826 | 0.002968181 |
| chr13 | 70500001 | 70600000 | 1047 | 911 | 70550000 | 0.128367 | 0.034557318 |
| chr13 | 70700001 | 70800000 | 943  | 787 | 70750000 | 0.188522 | 0.003871948 |
| chr13 | 70750001 | 70850000 | 997  | 822 | 70800000 | 0.206083 | 0.001814893 |
| chr13 | 70800001 | 70900000 | 1060 | 889 | 70850000 | 0.181437 | 0.005177027 |
| chr13 | 71000001 | 71100000 | 948  | 817 | 71050000 | 0.142179 | 0.022095998 |
| chr13 | 71050001 | 71150000 | 1016 | 833 | 71100000 | 0.21414  | 0.00125906  |
| chr13 | 71100001 | 71200000 | 1079 | 863 | 71150000 | 0.249891 | 0.000216848 |
| chr13 | 71150001 | 71250000 | 1062 | 866 | 71200000 | 0.221973 | 0.000872857 |
| chr13 | 71500001 | 71600000 | 1012 | 884 | 71550000 | 0.122719 | 0.041102583 |
| chr13 | 71650001 | 71750000 | 1032 | 845 | 71700000 | 0.216048 | 0.001152721 |
| chr13 | 71800001 | 71900000 | 1048 | 873 | 71850000 | 0.191213 | 0.003459547 |
| chr13 | 71850001 | 71950000 | 1057 | 867 | 71900000 | 0.2135   | 0.001296736 |
| chr13 | 72050001 | 72150000 | 1011 | 834 | 72100000 | 0.205292 | 0.001880116 |
| chr13 | 72100001 | 72200000 | 1030 | 847 | 72150000 | 0.209839 | 0.001532653 |
| chr13 | 72200001 | 72300000 | 1030 | 863 | 72250000 | 0.18284  | 0.004891065 |
| chr13 | 72250001 | 72350000 | 1076 | 874 | 72300000 | 0.227601 | 0.000666434 |
| chr13 | 72800001 | 72900000 | 964  | 834 | 72850000 | 0.136614 | 0.026563196 |
| chr13 | 72850001 | 72950000 | 1046 | 886 | 72900000 | 0.167132 | 0.009061255 |
| chr13 | 73400001 | 73500000 | 943  | 812 | 73450000 | 0.143406 | 0.021201686 |
| chr13 | 73450001 | 73550000 | 964  | 786 | 73500000 | 0.222132 | 0.000866294 |
| chr13 | 73500001 | 73600000 | 973  | 771 | 73550000 | 0.263337 | 0.000105664 |
| chr13 | 74350001 | 74450000 | 1031 | 871 | 74400000 | 0.170928 | 0.007837784 |
| chr13 | 74500001 | 74600000 | 1095 | 946 | 74550000 | 0.138647 | 0.024850552 |
| chr13 | 75150001 | 75250000 | 1094 | 911 | 75200000 | 0.191718 | 0.003386775 |
| chr13 | 75200001 | 75300000 | 1054 | 920 | 75250000 | 0.123797 | 0.039780595 |
| chr13 | 75400001 | 75500000 | 1034 | 890 | 75450000 | 0.143987 | 0.020789145 |
| chr13 | 75450001 | 75550000 | 964  | 832 | 75500000 | 0.140078 | 0.02370173  |
| chr13 | 76550001 | 76650000 | 1094 | 958 | 76600000 | 0.119143 | 0.045745337 |
| chr13 | 76850001 | 76950000 | 968  | 798 | 76900000 | 0.206247 | 0.001801704 |
| chr13 | 76900001 | 77000000 | 973  | 805 | 76950000 | 0.201079 | 0.002264677 |
| chr13 | 77150001 | 77250000 | 958  | 779 | 77200000 | 0.226031 | 0.000718952 |
| chr13 | 77200001 | 77300000 | 1055 | 896 | 77250000 | 0.163301 | 0.010463669 |

|       |          |          |      |      |          |          |             |
|-------|----------|----------|------|------|----------|----------|-------------|
| chr13 | 77650001 | 77750000 | 1055 | 920  | 77700000 | 0.125165 | 0.038153109 |
| chr13 | 77700001 | 77800000 | 996  | 848  | 77750000 | 0.15971  | 0.011946571 |
| chr13 | 78100001 | 78200000 | 1014 | 1060 | 78150000 | -0.13638 | 0.02648647  |
| chr13 | 78150001 | 78250000 | 960  | 1008 | 78200000 | -0.14276 | 0.02141004  |
| chr13 | 78200001 | 78300000 | 858  | 896  | 78250000 | -0.13489 | 0.027802736 |
| chr13 | 78500001 | 78600000 | 917  | 743  | 78550000 | 0.231188 | 0.000559535 |
| chr13 | 78550001 | 78650000 | 1015 | 818  | 78600000 | 0.238935 | 0.000380624 |
| chr13 | 78700001 | 78800000 | 1041 | 908  | 78750000 | 0.124834 | 0.038542204 |
| chr13 | 78750001 | 78850000 | 1132 | 972  | 78800000 | 0.147474 | 0.01845365  |
| chr13 | 79150001 | 79250000 | 957  | 989  | 79200000 | -0.11982 | 0.044498693 |
| chr13 | 79250001 | 79350000 | 1072 | 899  | 79300000 | 0.18154  | 0.005155547 |
| chr13 | 79300001 | 79400000 | 1107 | 957  | 79350000 | 0.137693 | 0.025642607 |
| chr13 | 79700001 | 79800000 | 1024 | 849  | 79750000 | 0.198007 | 0.002588753 |
| chr13 | 79750001 | 79850000 | 994  | 866  | 79800000 | 0.126507 | 0.036610526 |
| chr13 | 80050001 | 80150000 | 1066 | 929  | 80100000 | 0.126085 | 0.037090003 |
| chr13 | 80100001 | 80200000 | 938  | 823  | 80150000 | 0.116324 | 0.04969721  |
| chr13 | 80350001 | 80450000 | 982  | 845  | 80400000 | 0.1444   | 0.020500191 |
| chr13 | 80400001 | 80500000 | 993  | 771  | 80450000 | 0.292691 | 1.97E-05    |
| chr13 | 80450001 | 80550000 | 934  | 793  | 80500000 | 0.16373  | 0.010297627 |
| chr13 | 80650001 | 80750000 | 983  | 859  | 80700000 | 0.122162 | 0.0418004   |
| chr13 | 80700001 | 80800000 | 894  | 778  | 80750000 | 0.128133 | 0.034810123 |
| chr13 | 80850001 | 80950000 | 931  | 787  | 80900000 | 0.170046 | 0.008108347 |
| chr13 | 81200001 | 81300000 | 973  | 850  | 81250000 | 0.122605 | 0.041244504 |
| chr13 | 81250001 | 81350000 | 979  | 834  | 81300000 | 0.15889  | 0.012309798 |
| chr13 | 81500001 | 81600000 | 986  | 853  | 81550000 | 0.13667  | 0.026514605 |
| chr13 | 81700001 | 81800000 | 1041 | 906  | 81750000 | 0.128015 | 0.034937813 |
| chr13 | 81950001 | 82050000 | 1012 | 849  | 8.20E+07 | 0.181001 | 0.005268913 |
| chr13 | 82000001 | 82100000 | 994  | 837  | 82050000 | 0.175646 | 0.006521671 |
| chr13 | 82550001 | 82650000 | 969  | 848  | 82600000 | 0.120061 | 0.044515877 |
| chr13 | 82600001 | 82700000 | 918  | 754  | 82650000 | 0.211558 | 0.001417365 |
| chr13 | 82650001 | 82750000 | 977  | 855  | 82700000 | 0.120062 | 0.044513569 |
| chr13 | 82700001 | 82800000 | 1031 | 902  | 82750000 | 0.120473 | 0.043971613 |
| chr13 | 82750001 | 82850000 | 1008 | 837  | 82800000 | 0.195824 | 0.002844048 |
| chr13 | 82800001 | 82900000 | 996  | 867  | 82850000 | 0.127742 | 0.035236218 |
| chr13 | 82850001 | 82950000 | 1063 | 914  | 82900000 | 0.145504 | 0.019744132 |
| chr13 | 82900001 | 83000000 | 1022 | 861  | 82950000 | 0.174938 | 0.006705763 |
| chr13 | 82950001 | 83050000 | 1008 | 833  | 8.30E+07 | 0.202735 | 0.002105677 |
| chr13 | 83000001 | 83100000 | 1045 | 837  | 83050000 | 0.247832 | 0.000241416 |
| chr13 | 83050001 | 83150000 | 1014 | 856  | 83100000 | 0.172003 | 0.007518809 |
| chr13 | 83150001 | 83250000 | 1044 | 905  | 83200000 | 0.13376  | 0.029133285 |
| chr13 | 83200001 | 83300000 | 1014 | 865  | 83250000 | 0.156914 | 0.013224701 |
| chr13 | 83250001 | 83350000 | 1032 | 895  | 83300000 | 0.133112 | 0.029745502 |
| chr13 | 83350001 | 83450000 | 982  | 851  | 83400000 | 0.134192 | 0.028731508 |
| chr13 | 83500001 | 83600000 | 1005 | 855  | 83550000 | 0.160827 | 0.011466519 |
| chr13 | 83600001 | 83700000 | 1077 | 890  | 83650000 | 0.202769 | 0.002102543 |
| chr13 | 83650001 | 83750000 | 1046 | 818  | 83700000 | 0.282338 | 3.63E-05    |
| chr13 | 83700001 | 83800000 | 1002 | 840  | 83750000 | 0.18205  | 0.005050427 |

|       |          |          |      |     |          |          |             |
|-------|----------|----------|------|-----|----------|----------|-------------|
| chr13 | 83750001 | 83850000 | 1014 | 844 | 83800000 | 0.192371 | 0.00329466  |
| chr13 | 83800001 | 83900000 | 1028 | 843 | 83850000 | 0.213864 | 0.001275186 |
| chr13 | 83850001 | 83950000 | 996  | 844 | 83900000 | 0.166531 | 0.009269832 |
| chr13 | 84050001 | 84150000 | 1081 | 907 | 84100000 | 0.18082  | 0.005307423 |
| chr13 | 84100001 | 84200000 | 1008 | 863 | 84150000 | 0.151691 | 0.015931779 |
| chr13 | 84150001 | 84250000 | 976  | 824 | 84200000 | 0.171865 | 0.007559136 |
| chr13 | 84350001 | 84450000 | 1053 | 910 | 84400000 | 0.138195 | 0.025222896 |
| chr13 | 84400001 | 84500000 | 994  | 826 | 84450000 | 0.194732 | 0.002980116 |
| chr13 | 84450001 | 84550000 | 964  | 808 | 84500000 | 0.182306 | 0.004998207 |
| chr13 | 84600001 | 84700000 | 992  | 864 | 84650000 | 0.126937 | 0.036127101 |
| chr13 | 84650001 | 84750000 | 984  | 836 | 84700000 | 0.162784 | 0.010666719 |
| chr13 | 84700001 | 84800000 | 1042 | 870 | 84750000 | 0.187896 | 0.003974034 |
| chr13 | 84750001 | 84850000 | 1065 | 849 | 84800000 | 0.254645 | 0.000168774 |
| chr13 | 84800001 | 84900000 | 1080 | 852 | 84850000 | 0.269734 | 7.42E-05    |
| chr13 | 84850001 | 84950000 | 1041 | 851 | 84900000 | 0.218367 | 0.001034577 |
| chr13 | 84900001 | 85000000 | 996  | 835 | 84950000 | 0.181998 | 0.005061014 |
| chr13 | 85100001 | 85200000 | 1027 | 894 | 85150000 | 0.127718 | 0.03526285  |
| chr13 | 85150001 | 85250000 | 1055 | 909 | 85200000 | 0.142519 | 0.021845187 |
| chr13 | 85200001 | 85300000 | 1101 | 841 | 85250000 | 0.316265 | 4.62E-06    |
| chr13 | 85250001 | 85350000 | 1123 | 798 | 85300000 | 0.420526 | 2.50E-09    |
| chr13 | 85300001 | 85400000 | 1036 | 851 | 85350000 | 0.211421 | 0.001426231 |
| chr13 | 85550001 | 85650000 | 1028 | 890 | 85600000 | 0.135591 | 0.027461522 |
| chr13 | 85600001 | 85700000 | 1010 | 851 | 85650000 | 0.174752 | 0.006754818 |
| chr13 | 85800001 | 85900000 | 1038 | 868 | 85850000 | 0.185668 | 0.004357262 |
| chr13 | 85850001 | 85950000 | 989  | 818 | 85900000 | 0.201498 | 0.002223486 |
| chr13 | 85900001 | 86000000 | 1003 | 805 | 85950000 | 0.244889 | 0.000281077 |
| chr13 | 85950001 | 86050000 | 1032 | 866 | 8.60E+07 | 0.180632 | 0.005347748 |
| chr13 | 86450001 | 86550000 | 913  | 767 | 86500000 | 0.179017 | 0.005705689 |
| chr13 | 86750001 | 86850000 | 134  | 100 | 86800000 | 0.349861 | 4.96E-07    |
| chr13 | 86850001 | 86950000 | 339  | 277 | 86900000 | 0.219028 | 0.001003042 |
| chr13 | 86900001 | 87000000 | 840  | 712 | 86950000 | 0.16614  | 0.009407544 |
| chr13 | 86950001 | 87050000 | 963  | 826 | 8.70E+07 | 0.149022 | 0.017490772 |
| chr13 | 87000001 | 87100000 | 947  | 802 | 87050000 | 0.16739  | 0.008973083 |
| chr13 | 87050001 | 87150000 | 1034 | 846 | 87100000 | 0.217135 | 0.001095891 |
| chr13 | 87100001 | 87200000 | 1027 | 808 | 87150000 | 0.273637 | 5.97E-05    |
| chr13 | 87150001 | 87250000 | 999  | 790 | 87200000 | 0.26626  | 9.00E-05    |
| chr13 | 87200001 | 87300000 | 987  | 815 | 87250000 | 0.203878 | 0.002001965 |
| chr13 | 87250001 | 87350000 | 885  | 772 | 87300000 | 0.124705 | 0.038694858 |
| chr13 | 87300001 | 87400000 | 954  | 820 | 87350000 | 0.145994 | 0.019416317 |
| chr13 | 87350001 | 87450000 | 1027 | 892 | 87400000 | 0.130949 | 0.031864797 |
| chr13 | 87450001 | 87550000 | 974  | 850 | 87500000 | 0.124087 | 0.039431173 |
| chr13 | 87500001 | 87600000 | 950  | 797 | 87550000 | 0.180976 | 0.005274233 |
| chr13 | 87550001 | 87650000 | 985  | 815 | 87600000 | 0.200952 | 0.002277344 |
| chr13 | 87600001 | 87700000 | 1004 | 839 | 87650000 | 0.186645 | 0.004185334 |
| chr13 | 87650001 | 87750000 | 1063 | 883 | 87700000 | 0.195284 | 0.002910595 |
| chr13 | 87750001 | 87850000 | 972  | 807 | 87800000 | 0.196016 | 0.002820771 |
| chr13 | 87800001 | 87900000 | 997  | 806 | 87850000 | 0.234442 | 0.000476536 |

|       |          |          |      |     |          |          |             |
|-------|----------|----------|------|-----|----------|----------|-------------|
| chr13 | 87850001 | 87950000 | 1045 | 905 | 87900000 | 0.135141 | 0.02786456  |
| chr13 | 87900001 | 88000000 | 1032 | 871 | 87950000 | 0.172327 | 0.007425143 |
| chr13 | 87950001 | 88050000 | 981  | 780 | 8.80E+07 | 0.258407 | 0.00013803  |
| chr13 | 88000001 | 88100000 | 961  | 773 | 88050000 | 0.241696 | 0.000330954 |
| chr13 | 88050001 | 88150000 | 1033 | 893 | 88100000 | 0.137736 | 0.025605814 |
| chr13 | 88100001 | 88200000 | 1102 | 944 | 88150000 | 0.150894 | 0.01638467  |
| chr13 | 88150001 | 88250000 | 1072 | 889 | 88200000 | 0.197678 | 0.002625922 |
| chr13 | 88200001 | 88300000 | 1032 | 861 | 88250000 | 0.188986 | 0.003797877 |
| chr13 | 88250001 | 88350000 | 1033 | 878 | 88300000 | 0.162176 | 0.0109099   |
| chr13 | 88300001 | 88400000 | 1040 | 869 | 88350000 | 0.186784 | 0.004161395 |
| chr13 | 88350001 | 88450000 | 1043 | 830 | 88400000 | 0.257184 | 0.000147395 |
| chr13 | 88400001 | 88500000 | 1049 | 857 | 88450000 | 0.219276 | 0.000991415 |
| chr13 | 88550001 | 88650000 | 1020 | 857 | 88600000 | 0.17883  | 0.00574829  |
| chr13 | 88850001 | 88950000 | 934  | 783 | 88900000 | 0.182038 | 0.005052683 |
| chr13 | 88900001 | 89000000 | 1003 | 875 | 88950000 | 0.124595 | 0.038825066 |
| chr13 | 89150001 | 89250000 | 925  | 791 | 89200000 | 0.153404 | 0.014995792 |
| chr13 | 89850001 | 89950000 | 1015 | 854 | 89900000 | 0.1768   | 0.0062314   |
| chr13 | 89900001 | 90000000 | 1007 | 843 | 89950000 | 0.184087 | 0.004648783 |
| chr13 | 89950001 | 90050000 | 1030 | 880 | 9.00E+07 | 0.154697 | 0.014320757 |
| chr13 | 90100001 | 90200000 | 948  | 825 | 90150000 | 0.128121 | 0.034822853 |
| chr13 | 90200001 | 90300000 | 986  | 865 | 90250000 | 0.116516 | 0.049419683 |
| chr13 | 90350001 | 90450000 | 1071 | 939 | 90400000 | 0.11739  | 0.04817229  |
| chr13 | 90400001 | 90500000 | 1063 | 905 | 90450000 | 0.15978  | 0.011915816 |
| chr13 | 90650001 | 90750000 | 1078 | 894 | 90700000 | 0.197639 | 0.002630367 |
| chr13 | 90700001 | 90800000 | 1024 | 849 | 90750000 | 0.198007 | 0.002588753 |
| chr13 | 90950001 | 91050000 | 975  | 843 | 9.10E+07 | 0.137498 | 0.025806857 |
| chr13 | 91000001 | 91100000 | 1024 | 857 | 91050000 | 0.184477 | 0.004575363 |
| chr13 | 91050001 | 91150000 | 1022 | 887 | 91100000 | 0.132017 | 0.030802534 |
| chr13 | 91150001 | 91250000 | 1071 | 917 | 91200000 | 0.151593 | 0.015987018 |
| chr13 | 91200001 | 91300000 | 1082 | 912 | 91250000 | 0.174223 | 0.006896367 |
| chr13 | 91250001 | 91350000 | 958  | 823 | 91300000 | 0.146761 | 0.01891177  |
| chr13 | 91350001 | 91450000 | 1004 | 854 | 91400000 | 0.16108  | 0.011360588 |
| chr13 | 91550001 | 91650000 | 1007 | 864 | 91600000 | 0.148589 | 0.017755959 |
| chr13 | 92100001 | 92200000 | 1045 | 860 | 92150000 | 0.208723 | 0.001612026 |
| chr13 | 92400001 | 92500000 | 925  | 799 | 92450000 | 0.138886 | 0.024655393 |
| chr13 | 92450001 | 92550000 | 877  | 759 | 92500000 | 0.136105 | 0.027006979 |
| chr13 | 92600001 | 92700000 | 976  | 851 | 92650000 | 0.12535  | 0.037937535 |
| chr13 | 92650001 | 92750000 | 944  | 819 | 92700000 | 0.132552 | 0.030282622 |
| chr13 | 92750001 | 92850000 | 1000 | 864 | 92800000 | 0.138525 | 0.024950637 |
| chr13 | 92800001 | 92900000 | 1048 | 908 | 92850000 | 0.134503 | 0.028445404 |
| chr13 | 92950001 | 93050000 | 1033 | 858 | 9.30E+07 | 0.195419 | 0.002893891 |
| chr13 | 93100001 | 93200000 | 909  | 795 | 93150000 | 0.120954 | 0.043344651 |
| chr13 | 93200001 | 93300000 | 871  | 725 | 93250000 | 0.19232  | 0.003301776 |
| chr13 | 93250001 | 93350000 | 722  | 620 | 93300000 | 0.147359 | 0.018527018 |
| chr13 | 93350001 | 93450000 | 874  | 761 | 93400000 | 0.127365 | 0.035651107 |
| chr13 | 93550001 | 93650000 | 1140 | 975 | 93600000 | 0.153188 | 0.015111157 |
| chr13 | 93650001 | 93750000 | 968  | 845 | 93700000 | 0.123684 | 0.03991799  |

|       |          |          |      |      |           |          |             |
|-------|----------|----------|------|------|-----------|----------|-------------|
| chr13 | 93700001 | 93800000 | 1058 | 865  | 93750000  | 0.218196 | 0.001042913 |
| chr13 | 94250001 | 94350000 | 1034 | 885  | 94300000  | 0.152115 | 0.015695667 |
| chr13 | 94300001 | 94400000 | 987  | 859  | 94350000  | 0.12802  | 0.034932549 |
| chr13 | 94500001 | 94600000 | 1052 | 904  | 94550000  | 0.146368 | 0.019168715 |
| chr13 | 94550001 | 94650000 | 1048 | 883  | 94600000  | 0.174782 | 0.006747109 |
| chr13 | 94850001 | 94950000 | 994  | 1031 | 94900000  | -0.1251  | 0.037913232 |
| chr13 | 95300001 | 95400000 | 1028 | 901  | 95350000  | 0.117869 | 0.04749821  |
| chr13 | 95600001 | 95700000 | 947  | 1017 | 95650000  | -0.17526 | 0.006484579 |
| chr13 | 95950001 | 96050000 | 778  | 817  | 9.60E+07  | -0.14294 | 0.021282212 |
| chr13 | 96000001 | 96100000 | 797  | 833  | 96050000  | -0.13611 | 0.02672161  |
| chr13 | 96450001 | 96550000 | 1026 | 893  | 96500000  | 0.127927 | 0.035034151 |
| chr13 | 96500001 | 96600000 | 978  | 823  | 96550000  | 0.17657  | 0.006288273 |
| chr13 | 97500001 | 97600000 | 919  | 1000 | 97550000  | -0.19424 | 0.002959604 |
| chr13 | 97550001 | 97650000 | 979  | 1061 | 97600000  | -0.18842 | 0.003790032 |
| chr13 | 97750001 | 97850000 | 978  | 1013 | 97800000  | -0.1231  | 0.0403081   |
| chr13 | 98250001 | 98350000 | 850  | 745  | 98300000  | 0.117851 | 0.04752453  |
| chr13 | 98450001 | 98550000 | 977  | 1011 | 98500000  | -0.12172 | 0.042026352 |
| chr13 | 98500001 | 98600000 | 927  | 1029 | 98550000  | -0.22297 | 0.000798505 |
| chr13 | 98550001 | 98650000 | 863  | 944  | 98600000  | -0.2018  | 0.002126748 |
| chr13 | 98900001 | 99000000 | 994  | 1034 | 98950000  | -0.12929 | 0.033267963 |
| chr13 | 99250001 | 99350000 | 918  | 798  | 99300000  | 0.129734 | 0.033109449 |
| chr13 | 99400001 | 99500000 | 957  | 1047 | 99450000  | -0.20204 | 0.002103808 |
| chr13 | 99450001 | 99550000 | 1012 | 1071 | 99500000  | -0.15412 | 0.014403746 |
| chr13 | 99950001 | 1E+08    | 1067 | 1121 | 1.00E+08  | -0.1436  | 0.02081006  |
| chr13 | 1E+08    | 1E+08    | 1036 | 896  | 100200000 | 0.137082 | 0.026160758 |
| chr13 | 1E+08    | 1E+08    | 1032 | 888  | 100250000 | 0.14444  | 0.020472574 |
| chr13 | 1.01E+08 | 1.01E+08 | 964  | 816  | 100900000 | 0.168092 | 0.00873699  |
| chr13 | 1.01E+08 | 1.01E+08 | 947  | 819  | 101400000 | 0.137129 | 0.026120073 |
| chr13 | 1.01E+08 | 1.02E+08 | 1005 | 813  | 101450000 | 0.233496 | 0.000499387 |
| chr13 | 1.01E+08 | 1.02E+08 | 1078 | 908  | 101500000 | 0.175221 | 0.006631671 |
| chr13 | 1.02E+08 | 1.02E+08 | 996  | 867  | 101600000 | 0.127742 | 0.035236218 |
| chr13 | 1.02E+08 | 1.02E+08 | 996  | 872  | 101900000 | 0.119446 | 0.045336963 |
| chr13 | 1.02E+08 | 1.02E+08 | 1033 | 902  | 102150000 | 0.123269 | 0.040423874 |
| chr13 | 1.02E+08 | 1.03E+08 | 1103 | 966  | 102500000 | 0.118966 | 0.045986368 |
| chr13 | 1.03E+08 | 1.03E+08 | 951  | 995  | 102600000 | -0.13762 | 0.025424265 |
| chr13 | 1.03E+08 | 1.03E+08 | 1039 | 909  | 102850000 | 0.120472 | 0.043973634 |
| chr13 | 1.04E+08 | 1.04E+08 | 964  | 1030 | 103600000 | -0.16791 | 0.008634162 |
| chr13 | 1.04E+08 | 1.05E+08 | 1021 | 883  | 104450000 | 0.137126 | 0.02612302  |
| chr13 | 1.04E+08 | 1.05E+08 | 1062 | 872  | 104500000 | 0.212012 | 0.00138827  |
| chr13 | 1.05E+08 | 1.05E+08 | 1030 | 899  | 104600000 | 0.12388  | 0.039681219 |
| chr13 | 1.05E+08 | 1.05E+08 | 1035 | 840  | 104650000 | 0.228798 | 0.000628828 |
| chr13 | 1.05E+08 | 1.05E+08 | 1005 | 849  | 104700000 | 0.170987 | 0.007819876 |
| chr13 | 1.05E+08 | 1.05E+08 | 981  | 842  | 104850000 | 0.148061 | 0.018083286 |
| chr13 | 1.05E+08 | 1.05E+08 | 1040 | 856  | 104900000 | 0.208529 | 0.001626167 |
| chr13 | 1.05E+08 | 1.05E+08 | 1024 | 864  | 104950000 | 0.172741 | 0.0073067   |
| chr13 | 1.05E+08 | 1.05E+08 | 1000 | 873  | 1.05E+08  | 0.123575 | 0.040050748 |
| chr13 | 1.05E+08 | 1.05E+08 | 1023 | 871  | 105050000 | 0.15969  | 0.011955299 |



|       |          |          |      |      |           |          |             |
|-------|----------|----------|------|------|-----------|----------|-------------|
| chr13 | 1.05E+08 | 1.05E+08 | 1009 | 881  | 105100000 | 0.12334  | 0.040336504 |
| chr13 | 1.05E+08 | 1.06E+08 | 1034 | 895  | 105500000 | 0.135905 | 0.027183429 |
| chr13 | 1.06E+08 | 1.06E+08 | 1010 | 830  | 105550000 | 0.2108   | 0.001467153 |
| chr13 | 1.06E+08 | 1.06E+08 | 998  | 823  | 105600000 | 0.205776 | 0.001840005 |
| chr13 | 1.07E+08 | 1.07E+08 | 1071 | 939  | 106600000 | 0.11739  | 0.04817229  |
| chr13 | 1.07E+08 | 1.07E+08 | 1019 | 1070 | 107150000 | -0.14283 | 0.021361164 |
| chr13 | 1.07E+08 | 1.08E+08 | 982  | 856  | 107450000 | 0.12574  | 0.037485577 |
| chr13 | 1.08E+08 | 1.08E+08 | 989  | 1047 | 107850000 | -0.15459 | 0.014162616 |
| chr13 | 1.08E+08 | 1.08E+08 | 986  | 1064 | 107900000 | -0.18221 | 0.004901016 |
| chr13 | 1.08E+08 | 1.08E+08 | 1055 | 921  | 108250000 | 0.123598 | 0.040022169 |
| chr13 | 1.08E+08 | 1.08E+08 | 1030 | 898  | 108300000 | 0.125485 | 0.037780704 |
| chr13 | 1.09E+08 | 1.09E+08 | 882  | 940  | 108550000 | -0.16425 | 0.009921732 |
| chr13 | 1.09E+08 | 1.09E+08 | 1019 | 877  | 108700000 | 0.144134 | 0.020686287 |
| chr13 | 1.09E+08 | 1.09E+08 | 1003 | 874  | 108900000 | 0.126245 | 0.036908147 |
| chr13 | 1.09E+08 | 1.09E+08 | 1026 | 894  | 108950000 | 0.126312 | 0.036831316 |
| chr13 | 1.1E+08  | 1.1E+08  | 1041 | 869  | 109650000 | 0.18817  | 0.003929066 |
| chr13 | 1.1E+08  | 1.1E+08  | 1020 | 892  | 109700000 | 0.121082 | 0.043178709 |
| chr13 | 1.1E+08  | 1.1E+08  | 1049 | 1102 | 110400000 | -0.14348 | 0.020892767 |
| chr13 | 1.1E+08  | 1.11E+08 | 969  | 1033 | 110450000 | -0.16464 | 0.009777005 |
| chr13 | 1.1E+08  | 1.11E+08 | 969  | 1002 | 110500000 | -0.12069 | 0.043362956 |
| chr13 | 1.11E+08 | 1.11E+08 | 894  | 932  | 110750000 | -0.13243 | 0.030108134 |
| chr13 | 1.11E+08 | 1.11E+08 | 1091 | 1143 | 110800000 | -0.13955 | 0.023853398 |
| chr13 | 1.11E+08 | 1.11E+08 | 1077 | 1111 | 110950000 | -0.11721 | 0.048084599 |
| chr13 | 1.11E+08 | 1.11E+08 | 1021 | 1128 | 1.11E+08  | -0.21616 | 0.001104202 |
| chr13 | 1.11E+08 | 1.11E+08 | 1034 | 1084 | 111050000 | -0.1405  | 0.023104783 |
| chr13 | 1.11E+08 | 1.11E+08 | 1073 | 1126 | 111100000 | -0.14193 | 0.022021496 |
| chr13 | 1.11E+08 | 1.11E+08 | 1020 | 1136 | 111150000 | -0.22777 | 0.000632665 |
| chr13 | 1.11E+08 | 1.11E+08 | 941  | 1056 | 111200000 | -0.23871 | 0.000365992 |
| chr13 | 1.12E+08 | 1.12E+08 | 934  | 1019 | 111750000 | -0.19803 | 0.002510429 |
| chr13 | 1.12E+08 | 1.12E+08 | 968  | 1035 | 111800000 | -0.16892 | 0.008304716 |
| chr13 | 1.12E+08 | 1.12E+08 | 1067 | 1106 | 111900000 | -0.12416 | 0.039019067 |
| chr13 | 1.12E+08 | 1.12E+08 | 1015 | 1126 | 111950000 | -0.2221  | 0.000832797 |
| chr13 | 1.12E+08 | 1.12E+08 | 979  | 1064 | 1.12E+08  | -0.19249 | 0.003189575 |
| chr13 | 1.12E+08 | 1.12E+08 | 1020 | 1082 | 112050000 | -0.1575  | 0.012744326 |
| chr13 | 1.12E+08 | 1.12E+08 | 1017 | 1092 | 112100000 | -0.17502 | 0.006543978 |
| chr13 | 1.12E+08 | 1.12E+08 | 978  | 1064 | 112150000 | -0.19396 | 0.002994348 |
| chr13 | 1.12E+08 | 1.12E+08 | 1011 | 1075 | 112200000 | -0.16093 | 0.011236571 |
| chr13 | 1.12E+08 | 1.12E+08 | 1050 | 1089 | 112250000 | -0.12499 | 0.038044219 |
| chr13 | 1.12E+08 | 1.12E+08 | 54   | 58   | 112400000 | -0.17547 | 0.006430766 |
| chr13 | 1.13E+08 | 1.13E+08 | 1047 | 1123 | 112650000 | -0.17347 | 0.006958526 |
| chr13 | 1.13E+08 | 1.13E+08 | 1033 | 1084 | 112700000 | -0.1419  | 0.022045474 |
| chr13 | 1.13E+08 | 1.13E+08 | 1039 | 1107 | 112750000 | -0.16383 | 0.010080816 |
| chr13 | 1.13E+08 | 1.13E+08 | 1018 | 1126 | 112800000 | -0.21784 | 0.001019977 |
| chr13 | 1.13E+08 | 1.13E+08 | 1004 | 1060 | 112850000 | -0.15068 | 0.016282033 |
| chr13 | 1.13E+08 | 1.13E+08 | 831  | 886  | 112900000 | -0.16483 | 0.009708364 |
| chr13 | 1.13E+08 | 1.13E+08 | 641  | 703  | 112950000 | -0.20557 | 0.001796553 |
| chr13 | 1.13E+08 | 1.13E+08 | 978  | 1025 | 113200000 | -0.14009 | 0.023424766 |

|       |          |          |      |      |           |          |             |
|-------|----------|----------|------|------|-----------|----------|-------------|
| chr13 | 1.13E+08 | 1.13E+08 | 960  | 997  | 113300000 | -0.12693 | 0.035821035 |
| chr13 | 1.13E+08 | 1.13E+08 | 1004 | 1096 | 113350000 | -0.19886 | 0.002420976 |
| chr13 | 1.13E+08 | 1.13E+08 | 982  | 1062 | 113400000 | -0.18536 | 0.004305076 |
| chr13 | 1.13E+08 | 1.14E+08 | 971  | 1060 | 113450000 | -0.19889 | 0.002417525 |
| chr13 | 1.13E+08 | 1.14E+08 | 1017 | 1154 | 113500000 | -0.2547  | 0.000158451 |
| chr13 | 1.14E+08 | 1.14E+08 | 1028 | 1188 | 113550000 | -0.28107 | 3.60E-05    |
| chr13 | 1.14E+08 | 1.14E+08 | 1077 | 1246 | 113600000 | -0.28266 | 3.28E-05    |
| chr13 | 1.14E+08 | 1.14E+08 | 1089 | 1307 | 113650000 | -0.33563 | 1.14E-06    |
| chr13 | 1.14E+08 | 1.14E+08 | 998  | 1241 | 113700000 | -0.38676 | 2.83E-08    |
| chr13 | 1.14E+08 | 1.14E+08 | 988  | 1142 | 113750000 | -0.28135 | 3.54E-05    |
| chr13 | 1.14E+08 | 1.14E+08 | 1017 | 1059 | 113800000 | -0.13075 | 0.031760158 |
| chr13 | 1.14E+08 | 1.14E+08 | 878  | 908  | 113950000 | -0.12084 | 0.043158182 |
| chr13 | 1.14E+08 | 1.14E+08 | 974  | 1032 | 114100000 | -0.15582 | 0.013547649 |
| chr13 | 1.14E+08 | 1.14E+08 | 957  | 1003 | 114150000 | -0.1401  | 0.023414404 |
| chr13 | 1.14E+08 | 1.14E+08 | 1015 | 1095 | 114200000 | -0.18182 | 0.004979184 |
| chr13 | 1.14E+08 | 1.14E+08 | 1008 | 1141 | 114250000 | -0.25117 | 0.000191287 |
| chr13 | 1.14E+08 | 1.14E+08 | 752  | 892  | 114300000 | -0.31868 | 3.53E-06    |
| chr13 | 1.14E+08 | 1.14E+08 | 281  | 354  | 114350000 | -0.40555 | 6.52E-09    |
| chr13 | 1.14E+08 | 1.14E+08 | 237  | 274  | 114400000 | -0.28166 | 3.48E-05    |
| chr13 | 1.14E+08 | 1.15E+08 | 760  | 883  | 114450000 | -0.28879 | 2.28E-05    |
| chr13 | 1.14E+08 | 1.15E+08 | 1004 | 1233 | 114500000 | -0.36879 | 1.09E-07    |
| chr13 | 1.15E+08 | 1.15E+08 | 1019 | 1209 | 114550000 | -0.31903 | 3.45E-06    |
| chr13 | 1.15E+08 | 1.15E+08 | 959  | 1054 | 114600000 | -0.20864 | 0.001563084 |
| chr13 | 1.15E+08 | 1.15E+08 | 421  | 469  | 114650000 | -0.22814 | 0.000621167 |
| chr13 | 1.15E+08 | 1.15E+08 | 108  | 153  | 114700000 | -0.57487 | 9.89E-16    |
| chr13 | 1.15E+08 | 1.15E+08 | 586  | 698  | 114750000 | -0.3247  | 2.38E-06    |
| chr13 | 1.15E+08 | 1.15E+08 | 962  | 1104 | 114800000 | -0.271   | 6.44E-05    |
| chr13 | 1.15E+08 | 1.15E+08 | 964  | 1152 | 114850000 | -0.32941 | 1.74E-06    |
| chr13 | 1.15E+08 | 1.15E+08 | 934  | 1092 | 114900000 | -0.29785 | 1.32E-05    |
| chr13 | 1.15E+08 | 1.15E+08 | 944  | 980  | 114950000 | -0.12637 | 0.036454846 |
| chr13 | 1.15E+08 | 1.15E+08 | 52   | 36   | 115150000 | 0.458143 | 1.09E-10    |
| chr10 | 1        | 100000   | 17   | 18   | 50000     | -0.15483 | 0.014039201 |
| chr10 | 100001   | 200000   | 718  | 621  | 150000    | 0.137019 | 0.026214499 |
| chr10 | 150001   | 250000   | 960  | 826  | 2.00E+05  | 0.144521 | 0.020416171 |
| chr10 | 350001   | 450000   | 963  | 1020 | 4.00E+05  | -0.15533 | 0.013788683 |
| chr10 | 400001   | 500000   | 987  | 1020 | 450000    | -0.11982 | 0.044504594 |
| chr10 | 450001   | 550000   | 919  | 970  | 5.00E+05  | -0.15029 | 0.016504579 |
| chr10 | 500001   | 600000   | 945  | 999  | 550000    | -0.15254 | 0.015240198 |
| chr10 | 550001   | 650000   | 1068 | 1108 | 6.00E+05  | -0.12542 | 0.037541245 |
| chr10 | 700001   | 800000   | 948  | 1003 | 750000    | -0.15373 | 0.014604785 |
| chr10 | 750001   | 850000   | 869  | 953  | 8.00E+05  | -0.20549 | 0.001803062 |
| chr10 | 800001   | 900000   | 971  | 1121 | 850000    | -0.27961 | 3.92E-05    |
| chr10 | 1050001  | 1150000  | 928  | 990  | 1100000   | -0.16568 | 0.009402512 |
| chr10 | 1100001  | 1200000  | 982  | 1153 | 1150000   | -0.30397 | 9.02E-06    |
| chr10 | 1150001  | 1250000  | 1008 | 1213 | 1200000   | -0.33946 | 8.80E-07    |
| chr10 | 1200001  | 1300000  | 935  | 1103 | 1250000   | -0.31077 | 5.87E-06    |
| chr10 | 1250001  | 1350000  | 850  | 947  | 1300000   | -0.22827 | 0.000617097 |

|       |          |          |      |      |          |          |             |
|-------|----------|----------|------|------|----------|----------|-------------|
| chr10 | 1300001  | 1400000  | 859  | 981  | 1350000  | -0.26397 | 9.55E-05    |
| chr10 | 1350001  | 1450000  | 997  | 1105 | 1400000  | -0.22075 | 0.000888238 |
| chr10 | 1650001  | 1750000  | 1034 | 1118 | 1700000  | -0.18506 | 0.004359762 |
| chr10 | 1700001  | 1800000  | 1043 | 1101 | 1750000  | -0.15045 | 0.01641445  |
| chr10 | 2150001  | 2250000  | 1114 | 952  | 2200000  | 0.154344 | 0.014502436 |
| chr10 | 2900001  | 3000000  | 1010 | 1067 | 2950000  | -0.15158 | 0.015772032 |
| chr10 | 2950001  | 3050000  | 980  | 1047 | 3.00E+06 | -0.16778 | 0.008677779 |
| chr10 | 3000001  | 3100000  | 928  | 993  | 3050000  | -0.17004 | 0.007954133 |
| chr10 | 3050001  | 3150000  | 920  | 1000 | 3100000  | -0.19267 | 0.003165567 |
| chr10 | 3100001  | 3200000  | 977  | 1086 | 3150000  | -0.22497 | 0.000725217 |
| chr10 | 3150001  | 3250000  | 984  | 1119 | 3200000  | -0.25785 | 0.000133583 |
| chr10 | 3200001  | 3300000  | 934  | 1074 | 3250000  | -0.27387 | 5.47E-05    |
| chr10 | 3250001  | 3350000  | 1020 | 1091 | 3300000  | -0.16945 | 0.008136681 |
| chr10 | 3550001  | 3650000  | 1062 | 914  | 3600000  | 0.144146 | 0.020677598 |
| chr10 | 3600001  | 3700000  | 1077 | 910  | 3650000  | 0.170708 | 0.007904474 |
| chr10 | 3800001  | 3900000  | 1020 | 1076 | 3850000  | -0.14948 | 0.016981761 |
| chr10 | 3950001  | 4050000  | 1079 | 908  | 4.00E+06 | 0.176559 | 0.006291101 |
| chr10 | 4000001  | 4100000  | 1046 | 903  | 4050000  | 0.139713 | 0.023990175 |
| chr10 | 4750001  | 4850000  | 1081 | 902  | 4800000  | 0.188795 | 0.003828175 |
| chr10 | 4800001  | 4900000  | 1073 | 918  | 4850000  | 0.152712 | 0.015367955 |
| chr10 | 5000001  | 5100000  | 610  | 515  | 5050000  | 0.171865 | 0.007559136 |
| chr10 | 5500001  | 5600000  | 1054 | 1107 | 5550000  | -0.14315 | 0.021127867 |
| chr10 | 5550001  | 5650000  | 1106 | 1171 | 5600000  | -0.15476 | 0.014075888 |
| chr10 | 5600001  | 5700000  | 1090 | 1144 | 5650000  | -0.14213 | 0.02187168  |
| chr10 | 5650001  | 5750000  | 992  | 1028 | 5700000  | -0.1238  | 0.039455216 |
| chr10 | 6150001  | 6250000  | 958  | 991  | 6200000  | -0.12123 | 0.042656751 |
| chr10 | 6200001  | 6300000  | 920  | 969  | 6250000  | -0.14723 | 0.018365577 |
| chr10 | 7550001  | 7650000  | 951  | 1028 | 7600000  | -0.18469 | 0.004425325 |
| chr10 | 8150001  | 8250000  | 918  | 954  | 8200000  | -0.12787 | 0.034789532 |
| chr10 | 8350001  | 8450000  | 1020 | 894  | 8400000  | 0.117851 | 0.04752453  |
| chr10 | 8750001  | 8850000  | 1015 | 863  | 8800000  | 0.161675 | 0.011113571 |
| chr10 | 8800001  | 8900000  | 1058 | 869  | 8850000  | 0.21154  | 0.001418536 |
| chr10 | 8850001  | 8950000  | 1050 | 899  | 8900000  | 0.151625 | 0.015969324 |
| chr10 | 8900001  | 9000000  | 1012 | 864  | 8950000  | 0.155734 | 0.013798519 |
| chr10 | 9050001  | 9150000  | 1069 | 905  | 9100000  | 0.1679   | 0.008800977 |
| chr10 | 9600001  | 9700000  | 1113 | 972  | 9650000  | 0.123054 | 0.040688808 |
| chr10 | 9650001  | 9750000  | 1148 | 991  | 9700000  | 0.139794 | 0.023926071 |
| chr10 | 9700001  | 9800000  | 1133 | 935  | 9750000  | 0.204738 | 0.001927047 |
| chr10 | 9750001  | 9850000  | 1160 | 952  | 9800000  | 0.21272  | 0.00134402  |
| chr10 | 9800001  | 9900000  | 1106 | 926  | 9850000  | 0.183896 | 0.004685338 |
| chr10 | 9850001  | 9950000  | 1019 | 864  | 9900000  | 0.165679 | 0.009572451 |
| chr10 | 9900001  | 10000000 | 1069 | 911  | 9950000  | 0.158367 | 0.012546257 |
| chr10 | 9950001  | 10050000 | 1054 | 878  | 1.00E+07 | 0.19121  | 0.003460003 |
| chr10 | 10000001 | 10100000 | 1021 | 874  | 10050000 | 0.151906 | 0.015811849 |
| chr10 | 10050001 | 10150000 | 984  | 851  | 10100000 | 0.137127 | 0.026121602 |
| chr10 | 10100001 | 10200000 | 983  | 838  | 10150000 | 0.157869 | 0.012775127 |
| chr10 | 10300001 | 10400000 | 1041 | 899  | 10350000 | 0.139205 | 0.02439686  |

|       |          |          |      |      |          |          |             |
|-------|----------|----------|------|------|----------|----------|-------------|
| chr10 | 10350001 | 10450000 | 1057 | 900  | 10400000 | 0.159607 | 0.01199168  |
| chr10 | 10500001 | 10600000 | 943  | 1000 | 10550000 | -0.15704 | 0.012960286 |
| chr10 | 10650001 | 10750000 | 1012 | 865  | 10700000 | 0.154065 | 0.014647111 |
| chr10 | 10700001 | 10800000 | 1017 | 873  | 10750000 | 0.147894 | 0.018187835 |
| chr10 | 11200001 | 11300000 | 1018 | 1076 | 11250000 | -0.15231 | 0.015365382 |
| chr10 | 11350001 | 11450000 | 1011 | 1056 | 11400000 | -0.1352  | 0.027527445 |
| chr10 | 12050001 | 12150000 | 773  | 677  | 12100000 | 0.118941 | 0.046020561 |
| chr10 | 12800001 | 12900000 | 958  | 991  | 12850000 | -0.12123 | 0.042656751 |
| chr10 | 12850001 | 12950000 | 914  | 958  | 12900000 | -0.1402  | 0.023335684 |
| chr10 | 13050001 | 13150000 | 879  | 745  | 13100000 | 0.166251 | 0.009368356 |
| chr10 | 13200001 | 13300000 | 944  | 804  | 13250000 | 0.15922  | 0.012162535 |
| chr10 | 13250001 | 13350000 | 859  | 711  | 13300000 | 0.200437 | 0.002329236 |
| chr10 | 13550001 | 13650000 | 1040 | 901  | 13600000 | 0.134613 | 0.028344656 |
| chr10 | 13650001 | 13750000 | 973  | 1011 | 13700000 | -0.12764 | 0.035033941 |
| chr10 | 14800001 | 14900000 | 983  | 847  | 14850000 | 0.142458 | 0.02189029  |
| chr10 | 14950001 | 15050000 | 670  | 568  | 1.50E+07 | 0.165898 | 0.009493722 |
| chr10 | 15700001 | 15800000 | 924  | 964  | 15750000 | -0.13351 | 0.029074755 |
| chr10 | 15900001 | 16000000 | 931  | 804  | 15950000 | 0.139214 | 0.024389911 |
| chr10 | 15950001 | 16050000 | 1005 | 829  | 1.60E+07 | 0.20538  | 0.001872777 |
| chr10 | 16300001 | 16400000 | 947  | 981  | 16350000 | -0.12326 | 0.040110856 |
| chr10 | 16400001 | 16500000 | 981  | 829  | 16450000 | 0.170509 | 0.007965182 |
| chr10 | 16500001 | 16600000 | 942  | 826  | 16550000 | 0.117214 | 0.048421652 |
| chr10 | 17100001 | 17200000 | 1047 | 873  | 17150000 | 0.189836 | 0.003665391 |
| chr10 | 17150001 | 17250000 | 1027 | 869  | 17200000 | 0.168636 | 0.008557728 |
| chr10 | 17700001 | 17800000 | 759  | 632  | 17750000 | 0.191804 | 0.003374576 |
| chr10 | 17750001 | 17850000 | 244  | 191  | 17800000 | 0.280937 | 3.93E-05    |
| chr10 | 17800001 | 17900000 | 6    | 13   | 17850000 | -1.18785 | 3.12E-51    |
| chr10 | 17850001 | 17950000 | 4    | 8    | 17900000 | -1.07237 | 8.26E-44    |
| chr10 | 17900001 | 18000000 | 6    | 1    | 17950000 | 2.512591 | 5.37E-120   |
| chr10 | 17950001 | 18050000 | 6    | 1    | 1.80E+07 | 2.512591 | 5.37E-120   |
| chr10 | 18000001 | 18100000 | 0    | 1    | 18050000 | #NAME?   | 1.59E-189   |
| chr10 | 18050001 | 18150000 | 2    | 3    | 18100000 | -0.65733 | 1.11E-19    |
| chr10 | 18100001 | 18200000 | 3    | 2    | 18150000 | 0.512591 | 8.10E-13    |
| chr10 | 18550001 | 18650000 | 958  | 832  | 18600000 | 0.13107  | 0.031742449 |
| chr10 | 18850001 | 18950000 | 743  | 769  | 18900000 | -0.12199 | 0.04168585  |
| chr10 | 19400001 | 19500000 | 1020 | 887  | 19450000 | 0.129191 | 0.033677707 |
| chr10 | 19450001 | 19550000 | 1031 | 847  | 19500000 | 0.211239 | 0.001438149 |
| chr10 | 19500001 | 19600000 | 979  | 846  | 19550000 | 0.138279 | 0.025153141 |
| chr10 | 19550001 | 19650000 | 1006 | 874  | 19600000 | 0.130553 | 0.032265513 |
| chr10 | 19700001 | 19800000 | 972  | 819  | 19750000 | 0.174721 | 0.006763139 |
| chr10 | 19750001 | 19850000 | 995  | 837  | 19800000 | 0.177097 | 0.006158511 |
| chr10 | 19850001 | 19950000 | 990  | 810  | 19900000 | 0.217135 | 0.001095891 |
| chr10 | 19900001 | 20000000 | 970  | 813  | 19950000 | 0.182358 | 0.004987775 |
| chr10 | 20250001 | 20350000 | 1010 | 881  | 20300000 | 0.12477  | 0.038618313 |
| chr10 | 20550001 | 20650000 | 986  | 843  | 20600000 | 0.153683 | 0.014847702 |
| chr10 | 21600001 | 21700000 | 829  | 684  | 21650000 | 0.205004 | 0.001904371 |
| chr10 | 21650001 | 21750000 | 825  | 681  | 21700000 | 0.204368 | 0.001959    |

|       |          |          |      |      |          |          |             |
|-------|----------|----------|------|------|----------|----------|-------------|
| chr10 | 21900001 | 22000000 | 966  | 814  | 21950000 | 0.174623 | 0.006789294 |
| chr10 | 21950001 | 22050000 | 1044 | 911  | 2.20E+07 | 0.124227 | 0.039263502 |
| chr10 | 22100001 | 22200000 | 883  | 760  | 22150000 | 0.144042 | 0.020750389 |
| chr10 | 22150001 | 22250000 | 991  | 838  | 22200000 | 0.169563 | 0.008259856 |
| chr10 | 23650001 | 23750000 | 897  | 936  | 23700000 | -0.13377 | 0.028831366 |
| chr10 | 23700001 | 23800000 | 823  | 852  | 23750000 | -0.12233 | 0.041258944 |
| chr10 | 23800001 | 23900000 | 907  | 783  | 23850000 | 0.139718 | 0.023985974 |
| chr10 | 23850001 | 23950000 | 990  | 812  | 23900000 | 0.213577 | 0.001292134 |
| chr10 | 24300001 | 24400000 | 934  | 809  | 24350000 | 0.134911 | 0.028072924 |
| chr10 | 24400001 | 24500000 | 1030 | 869  | 24450000 | 0.172844 | 0.00727729  |
| chr10 | 24450001 | 24550000 | 1027 | 833  | 24500000 | 0.229676 | 0.00060249  |
| chr10 | 24600001 | 24700000 | 964  | 845  | 24650000 | 0.11771  | 0.047721359 |
| chr10 | 25250001 | 25350000 | 1028 | 863  | 25300000 | 0.180036 | 0.005477432 |
| chr10 | 25400001 | 25500000 | 855  | 891  | 25450000 | -0.13187 | 0.030647461 |
| chr10 | 25500001 | 25600000 | 1030 | 849  | 25550000 | 0.206436 | 0.001786491 |
| chr10 | 26150001 | 26250000 | 1007 | 876  | 26200000 | 0.128689 | 0.034211178 |
| chr10 | 26200001 | 26300000 | 951  | 790  | 26250000 | 0.195221 | 0.002918523 |
| chr10 | 26800001 | 26900000 | 911  | 763  | 26850000 | 0.183396 | 0.004781677 |
| chr10 | 27100001 | 27200000 | 768  | 824  | 27150000 | -0.17391 | 0.006838645 |
| chr10 | 27250001 | 27350000 | 970  | 825  | 27300000 | 0.161219 | 0.011302412 |
| chr10 | 27300001 | 27400000 | 906  | 785  | 27350000 | 0.134447 | 0.028496916 |
| chr10 | 27350001 | 27450000 | 893  | 749  | 27400000 | 0.181323 | 0.005201008 |
| chr10 | 28300001 | 28400000 | 1036 | 907  | 28350000 | 0.119478 | 0.045294007 |
| chr10 | 28650001 | 28750000 | 892  | 772  | 28700000 | 0.136071 | 0.027036937 |
| chr10 | 29750001 | 29850000 | 797  | 829  | 29800000 | -0.12916 | 0.03340046  |
| chr10 | 30100001 | 30200000 | 1036 | 1068 | 30150000 | -0.11626 | 0.049449666 |
| chr10 | 30150001 | 30250000 | 982  | 1035 | 30200000 | -0.14821 | 0.017754703 |
| chr10 | 31050001 | 31150000 | 1016 | 1073 | 31100000 | -0.15112 | 0.016028274 |
| chr10 | 31300001 | 31400000 | 980  | 837  | 31350000 | 0.155182 | 0.014074349 |
| chr10 | 31600001 | 31700000 | 1014 | 846  | 31650000 | 0.188956 | 0.00380259  |
| chr10 | 31650001 | 31750000 | 913  | 724  | 31700000 | 0.262253 | 0.000112097 |
| chr10 | 31700001 | 31800000 | 934  | 781  | 31750000 | 0.185728 | 0.004346434 |
| chr10 | 32050001 | 32150000 | 1001 | 860  | 32100000 | 0.146662 | 0.018976718 |
| chr10 | 32100001 | 32200000 | 979  | 842  | 32150000 | 0.145117 | 0.020006383 |
| chr10 | 33100001 | 33200000 | 833  | 726  | 33150000 | 0.125975 | 0.037215849 |
| chr10 | 33150001 | 33250000 | 932  | 813  | 33200000 | 0.124703 | 0.03869723  |
| chr10 | 33800001 | 33900000 | 966  | 840  | 33850000 | 0.129262 | 0.033603145 |
| chr10 | 34250001 | 34350000 | 905  | 978  | 34300000 | -0.18429 | 0.004500183 |
| chr10 | 34300001 | 34400000 | 928  | 964  | 34350000 | -0.12728 | 0.035433265 |
| chr10 | 34950001 | 35050000 | 907  | 951  | 3.50E+07 | -0.14071 | 0.022939483 |
| chr10 | 36000001 | 36100000 | 1049 | 891  | 36050000 | 0.163146 | 0.010524196 |
| chr10 | 36700001 | 36800000 | 904  | 777  | 36750000 | 0.146036 | 0.019387884 |
| chr10 | 36750001 | 36850000 | 928  | 776  | 36800000 | 0.185696 | 0.00435213  |
| chr10 | 37050001 | 37150000 | 863  | 736  | 37100000 | 0.157283 | 0.013049408 |
| chr10 | 37100001 | 37200000 | 793  | 690  | 37150000 | 0.128353 | 0.03457239  |
| chr10 | 37450001 | 37550000 | 528  | 456  | 37500000 | 0.139132 | 0.02445574  |
| chr10 | 38100001 | 38200000 | 890  | 775  | 38150000 | 0.127237 | 0.035792689 |

|       |          |          |      |      |          |          |             |
|-------|----------|----------|------|------|----------|----------|-------------|
| chr10 | 38150001 | 38250000 | 837  | 713  | 38200000 | 0.158954 | 0.012281076 |
| chr10 | 38350001 | 38450000 | 747  | 629  | 38400000 | 0.175676 | 0.006513973 |
| chr10 | 38600001 | 38700000 | 120  | 130  | 38650000 | -0.18785 | 0.003881164 |
| chr10 | 38650001 | 38750000 | 83   | 97   | 38700000 | -0.29725 | 1.37E-05    |
| chr10 | 38700001 | 38800000 | 521  | 650  | 38750000 | -0.39153 | 1.96E-08    |
| chr10 | 38750001 | 38850000 | 966  | 1261 | 38800000 | -0.45684 | 8.87E-11    |
| chr10 | 38800001 | 38900000 | 857  | 1119 | 38850000 | -0.45721 | 8.58E-11    |
| chr10 | 38850001 | 38950000 | 427  | 518  | 38900000 | -0.35109 | 3.92E-07    |
| chr10 | 38950001 | 39050000 | 104  | 110  | 3.90E+07 | -0.15329 | 0.014837967 |
| chr10 | 39000001 | 39100000 | 472  | 588  | 39050000 | -0.3894  | 2.31E-08    |
| chr10 | 39050001 | 39150000 | 1579 | 1958 | 39100000 | -0.38274 | 3.85E-08    |
| chr10 | 39100001 | 39200000 | 1310 | 1631 | 39150000 | -0.38856 | 2.47E-08    |
| chr10 | 39150001 | 39250000 | 145  | 192  | 39200000 | -0.47743 | 1.41E-11    |
| chr10 | 42300001 | 42400000 | 3834 | 4449 | 42350000 | -0.287   | 2.54E-05    |
| chr10 | 42350001 | 42450000 | 4484 | 5130 | 42400000 | -0.26654 | 8.27E-05    |
| chr10 | 42700001 | 42800000 | 231  | 268  | 42750000 | -0.28671 | 2.58E-05    |
| chr10 | 42750001 | 42850000 | 544  | 566  | 42800000 | -0.12957 | 0.03297835  |
| chr10 | 43100001 | 43200000 | 677  | 701  | 43150000 | -0.12263 | 0.040887763 |
| chr10 | 43150001 | 43250000 | 566  | 624  | 43200000 | -0.21312 | 0.001272509 |
| chr10 | 43300001 | 43400000 | 600  | 620  | 43350000 | -0.11968 | 0.044693179 |
| chr10 | 43350001 | 43450000 | 747  | 818  | 43400000 | -0.20336 | 0.001983532 |
| chr10 | 43400001 | 43500000 | 856  | 976  | 43450000 | -0.26164 | 0.000108566 |
| chr10 | 43450001 | 43550000 | 975  | 1039 | 43500000 | -0.16409 | 0.009981926 |
| chr10 | 43500001 | 43600000 | 1051 | 1162 | 43550000 | -0.21722 | 0.001050346 |
| chr10 | 43550001 | 43650000 | 1049 | 1191 | 43600000 | -0.25553 | 0.000151479 |
| chr10 | 43700001 | 43800000 | 1100 | 1151 | 43750000 | -0.13776 | 0.025312794 |
| chr10 | 43750001 | 43850000 | 974  | 1005 | 43800000 | -0.11757 | 0.047575064 |
| chr10 | 44700001 | 44800000 | 842  | 889  | 44750000 | -0.15073 | 0.016248632 |
| chr10 | 44750001 | 44850000 | 997  | 1035 | 44800000 | -0.12634 | 0.036488273 |
| chr10 | 44800001 | 44900000 | 1118 | 1223 | 44850000 | -0.20188 | 0.002119408 |
| chr10 | 44850001 | 44950000 | 972  | 1039 | 44900000 | -0.16854 | 0.008428455 |
| chr10 | 44950001 | 45050000 | 869  | 926  | 4.50E+07 | -0.16403 | 0.010006577 |
| chr10 | 45000001 | 45100000 | 966  | 1015 | 45050000 | -0.14376 | 0.020698013 |
| chr10 | 45300001 | 45400000 | 1052 | 1160 | 45350000 | -0.21336 | 0.001258055 |
| chr10 | 45350001 | 45450000 | 1044 | 1189 | 45400000 | -0.26    | 0.000118816 |
| chr10 | 45400001 | 45500000 | 1082 | 1210 | 45450000 | -0.23368 | 0.000472026 |
| chr10 | 45850001 | 45950000 | 856  | 940  | 45900000 | -0.20742 | 0.001652435 |
| chr10 | 46150001 | 46250000 | 200  | 207  | 46200000 | -0.122   | 0.041674011 |
| chr10 | 46200001 | 46300000 | 60   | 66   | 46250000 | -0.20988 | 0.001477547 |
| chr10 | 46250001 | 46350000 | 12   | 13   | 46300000 | -0.18785 | 0.003881164 |
| chr10 | 46450001 | 46550000 | 8    | 23   | 46500000 | -1.59593 | 1.81E-77    |
| chr10 | 46500001 | 46600000 | 11   | 27   | 46550000 | -1.36783 | 6.37E-63    |
| chr10 | 46550001 | 46650000 | 6    | 5    | 46600000 | 0.190663 | 0.003540577 |
| chr10 | 46850001 | 46950000 | 15   | 11   | 46900000 | 0.375087 | 8.22E-08    |
| chr10 | 46900001 | 47000000 | 768  | 878  | 46950000 | -0.26549 | 8.77E-05    |
| chr10 | 46950001 | 47050000 | 1829 | 1961 | 4.70E+07 | -0.17291 | 0.007113808 |
| chr10 | 47150001 | 47250000 | 4    | 1    | 47200000 | 1.927628 | 4.39E-93    |

|       |          |          |      |      |          |          |             |
|-------|----------|----------|------|------|----------|----------|-------------|
| chr10 | 47200001 | 47300000 | 4    | 2    | 47250000 | 0.927628 | 7.06E-34    |
| chr10 | 47250001 | 47350000 | 8    | 9    | 47300000 | -0.2423  | 0.000304577 |
| chr10 | 47300001 | 47400000 | 21   | 24   | 47350000 | -0.26502 | 9.01E-05    |
| chr10 | 47350001 | 47450000 | 18   | 22   | 47400000 | -0.36188 | 1.81E-07    |
| chr10 | 47400001 | 47500000 | 3    | 5    | 47450000 | -0.80934 | 7.76E-28    |
| chr10 | 47450001 | 47550000 | 75   | 55   | 47500000 | 0.375087 | 8.22E-08    |
| chr10 | 47550001 | 47650000 | 638  | 682  | 47600000 | -0.16859 | 0.008412954 |
| chr10 | 47600001 | 47700000 | 865  | 937  | 47650000 | -0.18772 | 0.003902069 |
| chr10 | 47650001 | 47750000 | 484  | 533  | 47700000 | -0.2115  | 0.001371223 |
| chr10 | 47700001 | 47800000 | 42   | 44   | 47750000 | -0.13949 | 0.023901227 |
| chr10 | 47750001 | 47850000 | 1    | 2    | 47800000 | -1.07237 | 8.26E-44    |
| chr10 | 48050001 | 48150000 | 0    | 1    | 48100000 | #NAME?   | 1.59E-189   |
| chr10 | 48100001 | 48200000 | 2    | 3    | 48150000 | -0.65733 | 1.11E-19    |
| chr10 | 48150001 | 48250000 | 3    | 2    | 48200000 | 0.512591 | 8.10E-13    |
| chr10 | 48300001 | 48400000 | 992  | 1057 | 48350000 | -0.16394 | 0.010041536 |
| chr10 | 48350001 | 48450000 | 1069 | 1186 | 48400000 | -0.22221 | 0.00082821  |
| chr10 | 48700001 | 48800000 | 10   | 4    | 48750000 | 1.249556 | 2.09E-53    |
| chr10 | 48800001 | 48900000 | 5    | 4    | 48850000 | 0.249556 | 0.000220671 |
| chr10 | 48850001 | 48950000 | 7    | 3    | 48900000 | 1.150021 | 2.93E-47    |
| chr10 | 48950001 | 49050000 | 8    | 9    | 4.90E+07 | -0.2423  | 0.000304577 |
| chr10 | 49150001 | 49250000 | 11   | 7    | 49200000 | 0.579705 | 1.10E-15    |
| chr10 | 49250001 | 49350000 | 4    | 9    | 49300000 | -1.2423  | 9.13E-55    |
| chr10 | 49300001 | 49400000 | 100  | 121  | 49350000 | -0.34738 | 5.08E-07    |
| chr10 | 49350001 | 49450000 | 646  | 675  | 49400000 | -0.13573 | 0.027058738 |
| chr10 | 49450001 | 49550000 | 1005 | 1049 | 49500000 | -0.13419 | 0.028443421 |
| chr10 | 49550001 | 49650000 | 978  | 852  | 49600000 | 0.126609 | 0.036495136 |
| chr10 | 49650001 | 49750000 | 1086 | 1202 | 49700000 | -0.21878 | 0.000975438 |
| chr10 | 49700001 | 49800000 | 1087 | 1133 | 49750000 | -0.13217 | 0.030359431 |
| chr10 | 49800001 | 49900000 | 1033 | 1092 | 49850000 | -0.1525  | 0.015260697 |
| chr10 | 49850001 | 49950000 | 1012 | 1125 | 49900000 | -0.22509 | 0.000720934 |
| chr10 | 49900001 | 50000000 | 1057 | 1197 | 49950000 | -0.25182 | 0.000184833 |
| chr10 | 49950001 | 50050000 | 1025 | 1154 | 5.00E+07 | -0.24339 | 0.000287824 |
| chr10 | 50000001 | 50100000 | 1102 | 1183 | 50050000 | -0.1747  | 0.006629282 |
| chr10 | 50150001 | 50250000 | 1030 | 1100 | 50200000 | -0.16723 | 0.008861846 |
| chr10 | 50200001 | 50300000 | 1035 | 1087 | 50250000 | -0.14309 | 0.021170371 |
| chr10 | 50250001 | 50350000 | 1087 | 1143 | 50300000 | -0.14485 | 0.019942204 |
| chr10 | 50300001 | 50400000 | 1038 | 1136 | 50350000 | -0.20253 | 0.002058861 |
| chr10 | 50500001 | 50600000 | 1100 | 1156 | 50550000 | -0.14401 | 0.02052009  |
| chr10 | 50550001 | 50650000 | 1045 | 1078 | 50600000 | -0.11723 | 0.04806524  |
| chr10 | 50750001 | 50850000 | 1057 | 1132 | 50800000 | -0.17127 | 0.007583366 |
| chr10 | 50800001 | 50900000 | 1092 | 1207 | 50850000 | -0.21682 | 0.001070045 |
| chr10 | 50950001 | 51050000 | 977  | 1027 | 5.10E+07 | -0.14438 | 0.020263966 |
| chr10 | 51400001 | 51500000 | 71   | 84   | 51450000 | -0.31494 | 4.50E-06    |
| chr10 | 51450001 | 51550000 | 494  | 514  | 51500000 | -0.12963 | 0.032913894 |
| chr10 | 51600001 | 51700000 | 4    | 9    | 51650000 | -1.2423  | 9.13E-55    |
| chr10 | 51750001 | 51850000 | 186  | 156  | 51800000 | 0.181385 | 0.00518798  |
| chr10 | 51800001 | 51900000 | 76   | 56   | 51850000 | 0.368201 | 1.36E-07    |

|       |          |          |      |      |          |          |             |
|-------|----------|----------|------|------|----------|----------|-------------|
| chr10 | 51850001 | 51950000 | 6    | 5    | 51900000 | 0.190663 | 0.003540577 |
| chr10 | 51900001 | 52000000 | 0    | 2    | 51950000 | #NAME?   | 1.59E-189   |
| chr10 | 52050001 | 52150000 | 1029 | 867  | 52100000 | 0.174767 | 0.006750892 |
| chr10 | 52100001 | 52200000 | 1030 | 889  | 52150000 | 0.140017 | 0.023749464 |
| chr10 | 52350001 | 52450000 | 719  | 754  | 52400000 | -0.14094 | 0.022763148 |
| chr10 | 52400001 | 52500000 | 286  | 320  | 52450000 | -0.23443 | 0.000454603 |
| chr10 | 52450001 | 52550000 | 144  | 154  | 52500000 | -0.16923 | 0.008206176 |
| chr10 | 52900001 | 53000000 | 1001 | 863  | 52950000 | 0.141638 | 0.022500681 |
| chr10 | 53250001 | 53350000 | 938  | 816  | 53300000 | 0.128647 | 0.034256252 |
| chr10 | 53300001 | 53400000 | 997  | 865  | 53350000 | 0.132522 | 0.030311658 |
| chr10 | 54250001 | 54350000 | 1028 | 889  | 54300000 | 0.137213 | 0.026048447 |
| chr10 | 54300001 | 54400000 | 1063 | 927  | 54350000 | 0.125129 | 0.038196254 |
| chr10 | 54450001 | 54550000 | 963  | 1005 | 54500000 | -0.13396 | 0.028657297 |
| chr10 | 54500001 | 54600000 | 986  | 1049 | 54550000 | -0.16173 | 0.010906809 |
| chr10 | 55000001 | 55100000 | 985  | 859  | 55050000 | 0.125094 | 0.038236956 |
| chr10 | 55050001 | 55150000 | 888  | 753  | 55100000 | 0.165538 | 0.009623372 |
| chr10 | 55350001 | 55450000 | 1031 | 827  | 55400000 | 0.245713 | 0.000269394 |
| chr10 | 55400001 | 55500000 | 963  | 817  | 55450000 | 0.164828 | 0.009883406 |
| chr10 | 55500001 | 55600000 | 990  | 820  | 55550000 | 0.199433 | 0.002433477 |
| chr10 | 55550001 | 55650000 | 1004 | 875  | 55600000 | 0.126033 | 0.03715013  |
| chr10 | 55900001 | 56000000 | 974  | 852  | 55950000 | 0.120697 | 0.043679243 |
| chr10 | 56000001 | 56100000 | 872  | 722  | 56050000 | 0.199958 | 0.002378483 |
| chr10 | 56050001 | 56150000 | 866  | 690  | 56100000 | 0.255399 | 0.000162141 |
| chr10 | 56100001 | 56200000 | 838  | 653  | 56150000 | 0.287495 | 2.69E-05    |
| chr10 | 56150001 | 56250000 | 911  | 709  | 56200000 | 0.289294 | 2.42E-05    |
| chr10 | 56200001 | 56300000 | 951  | 803  | 56250000 | 0.171674 | 0.007615344 |
| chr10 | 56450001 | 56550000 | 948  | 813  | 56500000 | 0.14926  | 0.017346831 |
| chr10 | 56550001 | 56650000 | 1022 | 884  | 56600000 | 0.136905 | 0.026312008 |
| chr10 | 56600001 | 56700000 | 977  | 856  | 56650000 | 0.118376 | 0.046794906 |
| chr10 | 56800001 | 56900000 | 1013 | 844  | 56850000 | 0.190948 | 0.003498455 |
| chr10 | 56850001 | 56950000 | 1022 | 848  | 56900000 | 0.196887 | 0.002717034 |
| chr10 | 56900001 | 57000000 | 948  | 822  | 56950000 | 0.133377 | 0.029493831 |
| chr10 | 56950001 | 57050000 | 983  | 838  | 5.70E+07 | 0.157869 | 0.012775127 |
| chr10 | 57000001 | 57100000 | 1015 | 857  | 57050000 | 0.171741 | 0.007595554 |
| chr10 | 57050001 | 57150000 | 1055 | 911  | 57100000 | 0.139348 | 0.024281783 |
| chr10 | 57100001 | 57200000 | 1091 | 938  | 57150000 | 0.14562  | 0.019666246 |
| chr10 | 57200001 | 57300000 | 1009 | 880  | 57250000 | 0.124979 | 0.038371687 |
| chr10 | 57250001 | 57350000 | 1044 | 858  | 57300000 | 0.2107   | 0.001473836 |
| chr10 | 57300001 | 57400000 | 843  | 733  | 57350000 | 0.129348 | 0.033513105 |
| chr10 | 57350001 | 57450000 | 772  | 630  | 57400000 | 0.220877 | 0.000919351 |
| chr10 | 57400001 | 57500000 | 1013 | 772  | 57450000 | 0.31959  | 3.73E-06    |
| chr10 | 57450001 | 57550000 | 851  | 713  | 57500000 | 0.182885 | 0.004882095 |
| chr10 | 57500001 | 57600000 | 736  | 642  | 57550000 | 0.124761 | 0.038628825 |
| chr10 | 57900001 | 58000000 | 994  | 812  | 57950000 | 0.219394 | 0.000985907 |
| chr10 | 57950001 | 58050000 | 990  | 831  | 5.80E+07 | 0.180208 | 0.005439683 |
| chr10 | 58000001 | 58100000 | 1020 | 875  | 58050000 | 0.148842 | 0.017600326 |
| chr10 | 58050001 | 58150000 | 1098 | 912  | 58100000 | 0.195401 | 0.002896169 |



|       |          |          |      |      |          |          |             |
|-------|----------|----------|------|------|----------|----------|-------------|
| chr10 | 58100001 | 58200000 | 1015 | 881  | 58150000 | 0.131894 | 0.030923661 |
| chr10 | 58250001 | 58350000 | 930  | 812  | 58300000 | 0.123379 | 0.040289121 |
| chr10 | 58300001 | 58400000 | 1006 | 836  | 58350000 | 0.194684 | 0.002986308 |
| chr10 | 58350001 | 58450000 | 970  | 784  | 58400000 | 0.234759 | 0.000469084 |
| chr10 | 58400001 | 58500000 | 900  | 781  | 58450000 | 0.132231 | 0.030594097 |
| chr10 | 58450001 | 58550000 | 1004 | 863  | 58500000 | 0.145955 | 0.019441948 |
| chr10 | 58600001 | 58700000 | 1039 | 907  | 58650000 | 0.123649 | 0.039959878 |
| chr10 | 59000001 | 59100000 | 1045 | 890  | 59050000 | 0.159254 | 0.012147292 |
| chr10 | 59050001 | 59150000 | 1056 | 895  | 59100000 | 0.166278 | 0.009358637 |
| chr10 | 59100001 | 59200000 | 1036 | 877  | 59150000 | 0.168003 | 0.008766538 |
| chr10 | 59150001 | 59250000 | 981  | 821  | 59200000 | 0.184499 | 0.00457119  |
| chr10 | 59300001 | 59400000 | 991  | 842  | 59350000 | 0.162693 | 0.010702635 |
| chr10 | 59400001 | 59500000 | 880  | 949  | 59450000 | -0.18128 | 0.005091349 |
| chr10 | 59500001 | 59600000 | 942  | 784  | 59550000 | 0.192502 | 0.003276502 |
| chr10 | 59550001 | 59650000 | 952  | 790  | 59600000 | 0.196737 | 0.002734654 |
| chr10 | 59600001 | 59700000 | 951  | 827  | 59650000 | 0.129186 | 0.033683122 |
| chr10 | 59700001 | 59800000 | 957  | 828  | 59750000 | 0.136516 | 0.026647851 |
| chr10 | 60350001 | 60450000 | 828  | 705  | 60400000 | 0.159636 | 0.011978948 |
| chr10 | 60400001 | 60500000 | 881  | 735  | 60450000 | 0.189026 | 0.003791557 |
| chr10 | 60900001 | 61000000 | 965  | 834  | 60950000 | 0.13811  | 0.025293825 |
| chr10 | 61150001 | 61250000 | 941  | 766  | 61200000 | 0.224479 | 0.000774587 |
| chr10 | 61200001 | 61300000 | 987  | 853  | 61250000 | 0.138133 | 0.025274891 |
| chr10 | 62150001 | 62250000 | 1121 | 983  | 62200000 | 0.117151 | 0.048510129 |
| chr10 | 63000001 | 63100000 | 1067 | 911  | 63050000 | 0.155665 | 0.013832672 |
| chr10 | 63150001 | 63250000 | 1037 | 894  | 63200000 | 0.141697 | 0.022455797 |
| chr10 | 63200001 | 63300000 | 1066 | 899  | 63250000 | 0.173443 | 0.007109771 |
| chr10 | 63250001 | 63350000 | 1013 | 854  | 63300000 | 0.173954 | 0.006969164 |
| chr10 | 63300001 | 63400000 | 1069 | 900  | 63350000 | 0.175893 | 0.006458597 |
| chr10 | 63350001 | 63450000 | 1065 | 927  | 63400000 | 0.12784  | 0.035128523 |
| chr10 | 63700001 | 63800000 | 1059 | 908  | 63750000 | 0.149567 | 0.017162612 |
| chr10 | 64000001 | 64100000 | 1032 | 878  | 64050000 | 0.160778 | 0.011487228 |
| chr10 | 64300001 | 64400000 | 1002 | 1039 | 64350000 | -0.12468 | 0.038398807 |
| chr10 | 64650001 | 64750000 | 996  | 870  | 64700000 | 0.122759 | 0.041053739 |
| chr10 | 65100001 | 65200000 | 1028 | 815  | 65150000 | 0.262597 | 0.000110022 |
| chr10 | 65150001 | 65250000 | 1052 | 806  | 65200000 | 0.311911 | 6.08E-06    |
| chr10 | 65300001 | 65400000 | 1000 | 846  | 65350000 | 0.168899 | 0.008472462 |
| chr10 | 65350001 | 65450000 | 955  | 832  | 65400000 | 0.126545 | 0.036567163 |
| chr10 | 65550001 | 65650000 | 871  | 899  | 65600000 | -0.11802 | 0.046951197 |
| chr10 | 66050001 | 66150000 | 1028 | 893  | 66100000 | 0.130736 | 0.032079494 |
| chr10 | 66400001 | 66500000 | 1011 | 848  | 66450000 | 0.181275 | 0.005211015 |
| chr10 | 66550001 | 66650000 | 969  | 809  | 66600000 | 0.187985 | 0.00395938  |
| chr10 | 66700001 | 66800000 | 1031 | 877  | 66750000 | 0.161024 | 0.011383922 |
| chr10 | 66850001 | 66950000 | 903  | 792  | 66900000 | 0.116854 | 0.048934131 |
| chr10 | 67100001 | 67200000 | 1023 | 853  | 67150000 | 0.189817 | 0.003668365 |
| chr10 | 67150001 | 67250000 | 969  | 819  | 67200000 | 0.170261 | 0.008041448 |
| chr10 | 67300001 | 67400000 | 1002 | 808  | 67350000 | 0.238084 | 0.000397294 |
| chr10 | 67350001 | 67450000 | 1013 | 869  | 67400000 | 0.148834 | 0.017605299 |

|       |          |          |      |      |          |          |             |
|-------|----------|----------|------|------|----------|----------|-------------|
| chr10 | 67500001 | 67600000 | 993  | 860  | 67550000 | 0.135085 | 0.027915254 |
| chr10 | 67550001 | 67650000 | 978  | 857  | 67600000 | 0.118167 | 0.047083397 |
| chr10 | 67700001 | 67800000 | 986  | 790  | 67750000 | 0.247363 | 0.000247358 |
| chr10 | 67750001 | 67850000 | 1055 | 868  | 67800000 | 0.209104 | 0.001584469 |
| chr10 | 68050001 | 68150000 | 880  | 765  | 68100000 | 0.129672 | 0.033173632 |
| chr10 | 68100001 | 68200000 | 885  | 763  | 68150000 | 0.141623 | 0.022512065 |
| chr10 | 68200001 | 68300000 | 948  | 820  | 68250000 | 0.136891 | 0.026323844 |
| chr10 | 68250001 | 68350000 | 1002 | 865  | 68300000 | 0.139739 | 0.023969899 |
| chr10 | 68300001 | 68400000 | 1019 | 891  | 68350000 | 0.121285 | 0.042916574 |
| chr10 | 68750001 | 68850000 | 1074 | 924  | 68800000 | 0.144657 | 0.020321616 |
| chr10 | 70350001 | 70450000 | 854  | 729  | 70400000 | 0.155945 | 0.013694228 |
| chr10 | 70600001 | 70700000 | 846  | 736  | 70650000 | 0.12858  | 0.034327886 |
| chr10 | 71100001 | 71200000 | 964  | 1014 | 71150000 | -0.14532 | 0.019617124 |
| chr10 | 71150001 | 71250000 | 969  | 1060 | 71200000 | -0.20187 | 0.002120209 |
| chr10 | 71250001 | 71350000 | 969  | 1026 | 71300000 | -0.15483 | 0.014039201 |
| chr10 | 71300001 | 71400000 | 1010 | 1098 | 71350000 | -0.19289 | 0.003134785 |
| chr10 | 71350001 | 71450000 | 1056 | 1164 | 71400000 | -0.21285 | 0.001288107 |
| chr10 | 71400001 | 71500000 | 1072 | 1163 | 71450000 | -0.18992 | 0.003557671 |
| chr10 | 71500001 | 71600000 | 1124 | 1181 | 71550000 | -0.14374 | 0.020710501 |
| chr10 | 71550001 | 71650000 | 1128 | 1244 | 71600000 | -0.21359 | 0.001244724 |
| chr10 | 71600001 | 71700000 | 1166 | 1284 | 71650000 | -0.21145 | 0.001374455 |
| chr10 | 71650001 | 71750000 | 1103 | 1215 | 71700000 | -0.2119  | 0.001346457 |
| chr10 | 71700001 | 71800000 | 960  | 1001 | 71750000 | -0.13271 | 0.029838101 |
| chr10 | 72150001 | 72250000 | 905  | 933  | 72200000 | -0.11633 | 0.049345968 |
| chr10 | 72200001 | 72300000 | 995  | 1079 | 72250000 | -0.1893  | 0.003651929 |
| chr10 | 72250001 | 72350000 | 1060 | 1139 | 72300000 | -0.17608 | 0.006276798 |
| chr10 | 72450001 | 72550000 | 1099 | 1141 | 72500000 | -0.12648 | 0.036327721 |
| chr10 | 72500001 | 72600000 | 1011 | 1092 | 72550000 | -0.18356 | 0.004636909 |
| chr10 | 72550001 | 72650000 | 1002 | 1071 | 72600000 | -0.16845 | 0.008458137 |
| chr10 | 72600001 | 72700000 | 1070 | 1157 | 72650000 | -0.18515 | 0.004342821 |
| chr10 | 72650001 | 72750000 | 1134 | 1221 | 72700000 | -0.17901 | 0.005579888 |
| chr10 | 72700001 | 72800000 | 1064 | 1137 | 72750000 | -0.16811 | 0.008569896 |
| chr10 | 72750001 | 72850000 | 1059 | 1157 | 72800000 | -0.20006 | 0.002296825 |
| chr10 | 72900001 | 73000000 | 1148 | 1200 | 72950000 | -0.13628 | 0.026568923 |
| chr10 | 72950001 | 73050000 | 1145 | 1189 | 7.30E+07 | -0.12677 | 0.035997587 |
| chr10 | 73000001 | 73100000 | 1155 | 1218 | 73050000 | -0.14899 | 0.017274353 |
| chr10 | 73050001 | 73150000 | 1102 | 1194 | 73100000 | -0.18805 | 0.003848553 |
| chr10 | 73100001 | 73200000 | 1043 | 1156 | 73150000 | -0.22077 | 0.000887335 |
| chr10 | 73150001 | 73250000 | 1083 | 1165 | 73200000 | -0.17767 | 0.005889977 |
| chr10 | 73200001 | 73300000 | 1104 | 1190 | 73250000 | -0.18059 | 0.005234709 |
| chr10 | 73250001 | 73350000 | 1093 | 1239 | 73300000 | -0.25325 | 0.000171192 |
| chr10 | 73300001 | 73400000 | 1116 | 1214 | 73350000 | -0.1938  | 0.003015048 |
| chr10 | 73350001 | 73450000 | 1088 | 1170 | 73400000 | -0.1772  | 0.00600104  |
| chr10 | 73400001 | 73500000 | 1115 | 1183 | 73450000 | -0.15778 | 0.012616991 |
| chr10 | 73450001 | 73550000 | 1132 | 1214 | 73500000 | -0.17327 | 0.007013994 |
| chr10 | 73500001 | 73600000 | 1118 | 1166 | 73550000 | -0.13302 | 0.029540214 |
| chr10 | 73650001 | 73750000 | 866  | 919  | 73700000 | -0.15807 | 0.012483242 |

|       |          |          |      |      |          |          |             |
|-------|----------|----------|------|------|----------|----------|-------------|
| chr10 | 73700001 | 73800000 | 980  | 1026 | 73750000 | -0.13855 | 0.024657445 |
| chr10 | 73750001 | 73850000 | 1029 | 1114 | 73800000 | -0.18688 | 0.004041898 |
| chr10 | 73800001 | 73900000 | 997  | 1051 | 73850000 | -0.14847 | 0.017593573 |
| chr10 | 73900001 | 74000000 | 806  | 700  | 73950000 | 0.131053 | 0.031759747 |
| chr10 | 74000001 | 74100000 | 859  | 927  | 74050000 | -0.18228 | 0.00488649  |
| chr10 | 74350001 | 74450000 | 814  | 714  | 74400000 | 0.116733 | 0.049107255 |
| chr10 | 74950001 | 75050000 | 950  | 822  | 7.50E+07 | 0.136417 | 0.026733979 |
| chr10 | 75000001 | 75100000 | 912  | 799  | 75050000 | 0.118467 | 0.046670055 |
| chr10 | 75150001 | 75250000 | 922  | 791  | 75200000 | 0.148717 | 0.017676948 |
| chr10 | 75500001 | 75600000 | 1016 | 1086 | 75550000 | -0.1685  | 0.008442636 |
| chr10 | 75550001 | 75650000 | 1072 | 1122 | 75600000 | -0.13814 | 0.024993998 |
| chr10 | 75700001 | 75800000 | 882  | 759  | 75750000 | 0.144307 | 0.020564939 |
| chr10 | 75750001 | 75850000 | 947  | 786  | 75800000 | 0.196463 | 0.00276706  |
| chr10 | 76100001 | 76200000 | 974  | 828  | 76150000 | 0.161919 | 0.011013903 |
| chr10 | 76200001 | 76300000 | 1071 | 926  | 76250000 | 0.137503 | 0.025802805 |
| chr10 | 76250001 | 76350000 | 972  | 822  | 76300000 | 0.169446 | 0.008296919 |
| chr10 | 76300001 | 76400000 | 862  | 738  | 76350000 | 0.151695 | 0.015929604 |
| chr10 | 76350001 | 76450000 | 939  | 805  | 76400000 | 0.149765 | 0.017044576 |
| chr10 | 76700001 | 76800000 | 1045 | 916  | 76750000 | 0.117712 | 0.047719068 |
| chr10 | 77150001 | 77250000 | 1054 | 1147 | 77200000 | -0.19436 | 0.002943437 |
| chr10 | 77400001 | 77500000 | 1034 | 1072 | 77450000 | -0.12444 | 0.038688268 |
| chr10 | 77800001 | 77900000 | 1166 | 1014 | 77850000 | 0.129138 | 0.033733684 |
| chr10 | 77850001 | 77950000 | 1018 | 888  | 77900000 | 0.124734 | 0.038660126 |
| chr10 | 77900001 | 78000000 | 934  | 801  | 77950000 | 0.149249 | 0.017353711 |
| chr10 | 77950001 | 78050000 | 986  | 859  | 7.80E+07 | 0.126558 | 0.036553262 |
| chr10 | 78000001 | 78100000 | 1073 | 927  | 78050000 | 0.138637 | 0.024858701 |
| chr10 | 78050001 | 78150000 | 1056 | 877  | 78100000 | 0.195589 | 0.002872847 |
| chr10 | 78100001 | 78200000 | 1034 | 896  | 78150000 | 0.134294 | 0.028637613 |
| chr10 | 78250001 | 78350000 | 1096 | 923  | 78300000 | 0.175473 | 0.006566219 |
| chr10 | 78300001 | 78400000 | 982  | 836  | 78350000 | 0.159848 | 0.011886105 |
| chr10 | 78500001 | 78600000 | 998  | 831  | 78550000 | 0.19182  | 0.003372297 |
| chr10 | 78550001 | 78650000 | 974  | 831  | 78600000 | 0.156702 | 0.013326435 |
| chr10 | 79250001 | 79350000 | 1046 | 1108 | 79300000 | -0.15545 | 0.013732236 |
| chr10 | 79300001 | 79400000 | 991  | 1052 | 79350000 | -0.15855 | 0.012265708 |
| chr10 | 79350001 | 79450000 | 1041 | 1077 | 79400000 | -0.12142 | 0.042414522 |
| chr10 | 79500001 | 79600000 | 965  | 1040 | 79550000 | -0.18035 | 0.005285647 |
| chr10 | 79550001 | 79650000 | 1046 | 1148 | 79600000 | -0.20661 | 0.00171421  |
| chr10 | 79850001 | 79950000 | 945  | 980  | 79900000 | -0.12484 | 0.038217021 |
| chr10 | 79900001 | 80000000 | 1133 | 1188 | 79950000 | -0.14076 | 0.022905513 |
| chr10 | 79950001 | 80050000 | 1139 | 1223 | 8.00E+07 | -0.17503 | 0.006543077 |
| chr10 | 80000001 | 80100000 | 1090 | 1135 | 80050000 | -0.13074 | 0.031779097 |
| chr10 | 80100001 | 80200000 | 1122 | 1161 | 80150000 | -0.12167 | 0.042099128 |
| chr10 | 80150001 | 80250000 | 1044 | 1174 | 80200000 | -0.24168 | 0.000314377 |
| chr10 | 80200001 | 80300000 | 1041 | 1137 | 80250000 | -0.19963 | 0.002340107 |
| chr10 | 80250001 | 80350000 | 1155 | 1193 | 80300000 | -0.11907 | 0.04550644  |
| chr10 | 80300001 | 80400000 | 1177 | 1249 | 80350000 | -0.15803 | 0.01250092  |
| chr10 | 80350001 | 80450000 | 1010 | 1063 | 80400000 | -0.14616 | 0.019062232 |

|       |          |          |      |      |          |          |             |
|-------|----------|----------|------|------|----------|----------|-------------|
| chr10 | 80600001 | 80700000 | 1126 | 1224 | 80650000 | -0.19277 | 0.003151727 |
| chr10 | 80650001 | 80750000 | 1117 | 1266 | 80700000 | -0.25302 | 0.000173356 |
| chr10 | 80750001 | 80850000 | 1173 | 1250 | 80800000 | -0.1641  | 0.009980591 |
| chr10 | 80800001 | 80900000 | 1231 | 1312 | 80850000 | -0.16431 | 0.00990124  |
| chr10 | 80850001 | 80950000 | 1239 | 1314 | 80900000 | -0.15716 | 0.012904351 |
| chr10 | 80900001 | 81000000 | 1152 | 1341 | 80950000 | -0.29154 | 1.93E-05    |
| chr10 | 80950001 | 81050000 | 1149 | 1342 | 8.10E+07 | -0.29638 | 1.44E-05    |
| chr10 | 81000001 | 81100000 | 1190 | 1333 | 81050000 | -0.23609 | 0.000418186 |
| chr10 | 81050001 | 81150000 | 1178 | 1273 | 81100000 | -0.18426 | 0.004504601 |
| chr10 | 81350001 | 81450000 | 464  | 399  | 81400000 | 0.145364 | 0.019838327 |
| chr10 | 81500001 | 81600000 | 54   | 40   | 81550000 | 0.360588 | 2.34E-07    |
| chr10 | 81550001 | 81650000 | 83   | 68   | 81600000 | 0.215205 | 0.001198657 |
| chr10 | 81900001 | 82000000 | 776  | 822  | 81950000 | -0.15545 | 0.013728907 |
| chr10 | 81950001 | 82050000 | 624  | 668  | 8.20E+07 | -0.17067 | 0.007761274 |
| chr10 | 82000001 | 82100000 | 783  | 847  | 82050000 | -0.18572 | 0.00424114  |
| chr10 | 82050001 | 82150000 | 826  | 894  | 82100000 | -0.1865  | 0.004105251 |
| chr10 | 82100001 | 82200000 | 871  | 916  | 82150000 | -0.14505 | 0.019804996 |
| chr10 | 83100001 | 83200000 | 1009 | 862  | 83150000 | 0.154795 | 0.014270951 |
| chr10 | 83750001 | 83850000 | 1013 | 881  | 83800000 | 0.129048 | 0.033828783 |
| chr10 | 84450001 | 84550000 | 980  | 834  | 84500000 | 0.160363 | 0.011664074 |
| chr10 | 84500001 | 84600000 | 1010 | 851  | 84550000 | 0.174752 | 0.006754818 |
| chr10 | 84750001 | 84850000 | 1026 | 857  | 84800000 | 0.187292 | 0.004074851 |
| chr10 | 84800001 | 84900000 | 983  | 808  | 84850000 | 0.210464 | 0.001489738 |
| chr10 | 84850001 | 84950000 | 986  | 824  | 84900000 | 0.186572 | 0.004198008 |
| chr10 | 84900001 | 85000000 | 1038 | 867  | 84950000 | 0.187331 | 0.004068289 |
| chr10 | 84950001 | 85050000 | 1058 | 908  | 8.50E+07 | 0.148204 | 0.017994353 |
| chr10 | 85000001 | 85100000 | 972  | 837  | 85050000 | 0.143357 | 0.021237053 |
| chr10 | 85700001 | 85800000 | 991  | 1040 | 85750000 | -0.142   | 0.021969662 |
| chr10 | 85950001 | 86050000 | 1015 | 1135 | 8.60E+07 | -0.23358 | 0.000474252 |
| chr10 | 86000001 | 86100000 | 914  | 965  | 86050000 | -0.15071 | 0.016264931 |
| chr10 | 86600001 | 86700000 | 1047 | 900  | 86650000 | 0.145893 | 0.019483409 |
| chr10 | 86650001 | 86750000 | 1013 | 885  | 86700000 | 0.122513 | 0.041359464 |
| chr10 | 86750001 | 86850000 | 1063 | 904  | 86800000 | 0.161375 | 0.011237465 |
| chr10 | 86800001 | 86900000 | 1029 | 863  | 86850000 | 0.181439 | 0.005176697 |
| chr10 | 87800001 | 87900000 | 1073 | 1174 | 87850000 | -0.20215 | 0.002093393 |
| chr10 | 87850001 | 87950000 | 1086 | 1223 | 87900000 | -0.24377 | 0.000282196 |
| chr10 | 87950001 | 88050000 | 1163 | 1232 | 8.80E+07 | -0.15552 | 0.013694514 |
| chr10 | 88000001 | 88100000 | 1120 | 1212 | 88050000 | -0.18626 | 0.00414682  |
| chr10 | 88050001 | 88150000 | 1154 | 1195 | 88100000 | -0.12274 | 0.040752766 |
| chr10 | 88350001 | 88450000 | 991  | 1036 | 88400000 | -0.13644 | 0.026434052 |
| chr10 | 88400001 | 88500000 | 1079 | 1120 | 88450000 | -0.12618 | 0.036671506 |
| chr10 | 88950001 | 89050000 | 51   | 60   | 8.90E+07 | -0.30684 | 7.53E-06    |
| chr10 | 89000001 | 89100000 | 24   | 27   | 89050000 | -0.2423  | 0.000304577 |
| chr10 | 89050001 | 89150000 | 32   | 39   | 89100000 | -0.35777 | 2.43E-07    |
| chr10 | 89150001 | 89250000 | 34   | 28   | 89200000 | 0.207736 | 0.00168529  |
| chr10 | 89400001 | 89500000 | 1071 | 914  | 89450000 | 0.156321 | 0.013510641 |
| chr10 | 89450001 | 89550000 | 1014 | 847  | 89500000 | 0.187252 | 0.004081577 |

|       |          |          |      |      |           |          |             |
|-------|----------|----------|------|------|-----------|----------|-------------|
| chr10 | 89500001 | 89600000 | 976  | 807  | 89550000  | 0.201941 | 0.002180663 |
| chr10 | 89550001 | 89650000 | 991  | 832  | 89600000  | 0.17993  | 0.005500839 |
| chr10 | 89650001 | 89750000 | 943  | 794  | 89700000  | 0.175747 | 0.006495903 |
| chr10 | 89700001 | 89800000 | 1003 | 855  | 89750000  | 0.157954 | 0.012736198 |
| chr10 | 90100001 | 90200000 | 1007 | 866  | 90150000  | 0.145253 | 0.019913777 |
| chr10 | 90300001 | 90400000 | 993  | 865  | 90350000  | 0.126722 | 0.036368415 |
| chr10 | 90350001 | 90450000 | 981  | 814  | 90400000  | 0.196853 | 0.002721096 |
| chr10 | 90400001 | 90500000 | 1065 | 926  | 90450000  | 0.129398 | 0.033460692 |
| chr10 | 90450001 | 90550000 | 1079 | 937  | 90500000  | 0.131202 | 0.031610251 |
| chr10 | 90500001 | 90600000 | 1065 | 927  | 90550000  | 0.12784  | 0.035128523 |
| chr10 | 90950001 | 91050000 | 969  | 1010 | 9.10E+07  | -0.13216 | 0.030368381 |
| chr10 | 91750001 | 91850000 | 916  | 801  | 91800000  | 0.121174 | 0.043060086 |
| chr10 | 92250001 | 92350000 | 1032 | 886  | 92300000  | 0.147693 | 0.018314996 |
| chr10 | 92450001 | 92550000 | 1017 | 1071 | 92500000  | -0.14701 | 0.018508722 |
| chr10 | 92600001 | 92700000 | 982  | 1019 | 92650000  | -0.12573 | 0.037180035 |
| chr10 | 93150001 | 93250000 | 914  | 744  | 93200000  | 0.22452  | 0.00077306  |
| chr10 | 93200001 | 93300000 | 875  | 735  | 93250000  | 0.179167 | 0.005671473 |
| chr10 | 93400001 | 93500000 | 987  | 859  | 93450000  | 0.12802  | 0.034932549 |
| chr10 | 93450001 | 93550000 | 943  | 813  | 93500000  | 0.141631 | 0.022506022 |
| chr10 | 93650001 | 93750000 | 946  | 809  | 93700000  | 0.153329 | 0.01503587  |
| chr10 | 93950001 | 94050000 | 857  | 744  | 9.40E+07  | 0.131621 | 0.031193293 |
| chr10 | 94000001 | 94100000 | 872  | 742  | 94050000  | 0.160537 | 0.011589527 |
| chr10 | 94150001 | 94250000 | 896  | 784  | 94200000  | 0.120273 | 0.044234652 |
| chr10 | 94200001 | 94300000 | 917  | 790  | 94250000  | 0.142697 | 0.02171457  |
| chr10 | 95350001 | 95450000 | 1068 | 930  | 95400000  | 0.127237 | 0.035792689 |
| chr10 | 96400001 | 96500000 | 729  | 775  | 96450000  | -0.16065 | 0.011352195 |
| chr10 | 96600001 | 96700000 | 675  | 699  | 96650000  | -0.12278 | 0.040706241 |
| chr10 | 96750001 | 96850000 | 785  | 664  | 96800000  | 0.169138 | 0.008395438 |
| chr10 | 96800001 | 96900000 | 767  | 669  | 96850000  | 0.124849 | 0.038525109 |
| chr10 | 97000001 | 97100000 | 1106 | 954  | 97050000  | 0.140918 | 0.023047953 |
| chr10 | 97050001 | 97150000 | 1101 | 949  | 97100000  | 0.141963 | 0.022257062 |
| chr10 | 97250001 | 97350000 | 971  | 1017 | 97300000  | -0.13915 | 0.024171468 |
| chr10 | 97700001 | 97800000 | 1015 | 869  | 97750000  | 0.15168  | 0.015938247 |
| chr10 | 98050001 | 98150000 | 1124 | 1169 | 98100000  | -0.129   | 0.033568723 |
| chr10 | 98100001 | 98200000 | 1084 | 1155 | 98150000  | -0.1639  | 0.010054865 |
| chr10 | 98150001 | 98250000 | 1065 | 1112 | 98200000  | -0.13468 | 0.02800017  |
| chr10 | 98400001 | 98500000 | 878  | 972  | 98450000  | -0.21911 | 0.000960626 |
| chr10 | 98600001 | 98700000 | 957  | 833  | 98650000  | 0.127831 | 0.035139186 |
| chr10 | 98750001 | 98850000 | 1055 | 1124 | 98800000  | -0.16377 | 0.010103788 |
| chr10 | 99750001 | 99850000 | 1035 | 1138 | 99800000  | -0.20924 | 0.001521019 |
| chr10 | 1E+08    | 1E+08    | 1068 | 1116 | 100150000 | -0.1358  | 0.026995126 |
| chr10 | 1.01E+08 | 1.01E+08 | 938  | 823  | 100650000 | 0.116324 | 0.04969721  |
| chr10 | 1.01E+08 | 1.01E+08 | 852  | 733  | 100700000 | 0.144668 | 0.020314022 |
| chr10 | 1.02E+08 | 1.02E+08 | 1067 | 896  | 101950000 | 0.179618 | 0.005570072 |
| chr10 | 1.02E+08 | 1.02E+08 | 960  | 829  | 1.02E+08  | 0.139291 | 0.024328192 |
| chr10 | 1.02E+08 | 1.02E+08 | 976  | 1089 | 102400000 | -0.23042 | 0.000555063 |
| chr10 | 1.02E+08 | 1.03E+08 | 987  | 1132 | 102450000 | -0.27012 | 6.76E-05    |

|       |          |          |      |      |           |          |             |
|-------|----------|----------|------|------|-----------|----------|-------------|
| chr10 | 1.02E+08 | 1.03E+08 | 1026 | 1160 | 102500000 | -0.24947 | 0.000209434 |
| chr10 | 1.03E+08 | 1.03E+08 | 1017 | 1169 | 102750000 | -0.27333 | 5.64E-05    |
| chr10 | 1.03E+08 | 1.03E+08 | 995  | 1214 | 102800000 | -0.35937 | 2.17E-07    |
| chr10 | 1.03E+08 | 1.03E+08 | 1049 | 1135 | 102850000 | -0.18605 | 0.004183768 |
| chr10 | 1.03E+08 | 1.03E+08 | 968  | 998  | 102950000 | -0.1164  | 0.049239796 |
| chr10 | 1.03E+08 | 1.03E+08 | 984  | 1039 | 1.03E+08  | -0.15084 | 0.016190083 |
| chr10 | 1.03E+08 | 1.03E+08 | 970  | 1020 | 103050000 | -0.14488 | 0.019915549 |
| chr10 | 1.03E+08 | 1.03E+08 | 924  | 977  | 103100000 | -0.15284 | 0.015080611 |
| chr10 | 1.03E+08 | 1.03E+08 | 1029 | 869  | 103250000 | 0.171443 | 0.007683489 |
| chr10 | 1.03E+08 | 1.03E+08 | 1082 | 1135 | 103350000 | -0.14136 | 0.022444768 |
| chr10 | 1.04E+08 | 1.04E+08 | 953  | 821  | 103750000 | 0.142722 | 0.021696372 |
| chr10 | 1.04E+08 | 1.04E+08 | 834  | 903  | 103850000 | -0.18705 | 0.004012938 |
| chr10 | 1.04E+08 | 1.04E+08 | 993  | 1064 | 104400000 | -0.172   | 0.007369414 |
| chr10 | 1.05E+08 | 1.05E+08 | 874  | 758  | 104650000 | 0.133064 | 0.029791184 |
| chr10 | 1.05E+08 | 1.05E+08 | 869  | 760  | 104950000 | 0.120985 | 0.043304027 |
| chr10 | 1.05E+08 | 1.05E+08 | 982  | 1015 | 105200000 | -0.12006 | 0.044189214 |
| chr10 | 1.05E+08 | 1.05E+08 | 958  | 1093 | 105250000 | -0.26257 | 0.000103166 |
| chr10 | 1.05E+08 | 1.05E+08 | 984  | 1153 | 105300000 | -0.30103 | 1.08E-05    |
| chr10 | 1.05E+08 | 1.05E+08 | 1065 | 1192 | 105350000 | -0.2349  | 0.000443904 |
| chr10 | 1.05E+08 | 1.06E+08 | 1102 | 1154 | 105450000 | -0.13889 | 0.024379227 |
| chr10 | 1.05E+08 | 1.06E+08 | 1090 | 1218 | 105500000 | -0.23256 | 0.000499208 |
| chr10 | 1.06E+08 | 1.06E+08 | 1095 | 1193 | 105550000 | -0.19603 | 0.002738293 |
| chr10 | 1.06E+08 | 1.06E+08 | 1005 | 1065 | 106050000 | -0.15603 | 0.013445685 |
| chr10 | 1.07E+08 | 1.07E+08 | 938  | 822  | 107150000 | 0.118078 | 0.047207992 |
| chr10 | 1.07E+08 | 1.07E+08 | 977  | 851  | 107200000 | 0.126828 | 0.036249573 |
| chr10 | 1.08E+08 | 1.08E+08 | 1040 | 899  | 107800000 | 0.137819 | 0.025536742 |
| chr10 | 1.08E+08 | 1.08E+08 | 972  | 845  | 108050000 | 0.129633 | 0.033214096 |
| chr10 | 1.08E+08 | 1.08E+08 | 1035 | 888  | 108150000 | 0.148627 | 0.017732136 |
| chr10 | 1.08E+08 | 1.08E+08 | 1028 | 869  | 108200000 | 0.17004  | 0.008110013 |
| chr10 | 1.09E+08 | 1.09E+08 | 999  | 856  | 108700000 | 0.150502 | 0.016611002 |
| chr10 | 1.09E+08 | 1.09E+08 | 981  | 840  | 108750000 | 0.151492 | 0.016043945 |
| chr10 | 1.09E+08 | 1.09E+08 | 974  | 1004 | 108950000 | -0.11614 | 0.049626725 |
| chr10 | 1.09E+08 | 1.09E+08 | 1060 | 916  | 109200000 | 0.138273 | 0.025158466 |
| chr10 | 1.09E+08 | 1.09E+08 | 1020 | 894  | 109250000 | 0.117851 | 0.04752453  |
| chr10 | 1.09E+08 | 1.09E+08 | 957  | 1001 | 109350000 | -0.13722 | 0.025761718 |
| chr10 | 1.09E+08 | 1.1E+08  | 1113 | 952  | 109500000 | 0.153048 | 0.015186127 |
| chr10 | 1.1E+08  | 1.1E+08  | 1044 | 890  | 109700000 | 0.157873 | 0.012773599 |
| chr10 | 1.1E+08  | 1.1E+08  | 968  | 846  | 109800000 | 0.121978 | 0.042032592 |
| chr10 | 1.1E+08  | 1.1E+08  | 942  | 817  | 109850000 | 0.133019 | 0.029833582 |
| chr10 | 1.1E+08  | 1.1E+08  | 1004 | 829  | 110050000 | 0.203943 | 0.001996188 |
| chr10 | 1.1E+08  | 1.1E+08  | 1115 | 945  | 110200000 | 0.166286 | 0.009356084 |
| chr10 | 1.1E+08  | 1.1E+08  | 971  | 833  | 110250000 | 0.148783 | 0.017636669 |
| chr10 | 1.11E+08 | 1.11E+08 | 805  | 702  | 111350000 | 0.125146 | 0.038175894 |
| chr10 | 1.12E+08 | 1.12E+08 | 1048 | 913  | 1.12E+08  | 0.12658  | 0.036527939 |
| chr10 | 1.12E+08 | 1.12E+08 | 1017 | 892  | 112050000 | 0.116832 | 0.048964889 |
| chr10 | 1.12E+08 | 1.12E+08 | 1080 | 1114 | 112150000 | -0.11709 | 0.048258577 |
| chr10 | 1.12E+08 | 1.12E+08 | 1025 | 1083 | 112200000 | -0.15178 | 0.015658096 |

|       |          |          |      |      |           |          |             |
|-------|----------|----------|------|------|-----------|----------|-------------|
| chr10 | 1.12E+08 | 1.12E+08 | 943  | 1000 | 112250000 | -0.15704 | 0.012960286 |
| chr10 | 1.12E+08 | 1.12E+08 | 1027 | 892  | 112350000 | 0.130949 | 0.031864797 |
| chr10 | 1.13E+08 | 1.13E+08 | 1045 | 884  | 112700000 | 0.169013 | 0.008435566 |
| chr10 | 1.13E+08 | 1.13E+08 | 1029 | 877  | 112750000 | 0.158222 | 0.012612407 |
| chr10 | 1.13E+08 | 1.13E+08 | 1025 | 1072 | 112850000 | -0.13705 | 0.025906381 |
| chr10 | 1.13E+08 | 1.13E+08 | 1074 | 911  | 112950000 | 0.165099 | 0.009783333 |
| chr10 | 1.14E+08 | 1.14E+08 | 901  | 942  | 113850000 | -0.13657 | 0.026319061 |
| chr10 | 1.14E+08 | 1.14E+08 | 995  | 1049 | 113900000 | -0.14862 | 0.017502305 |
| chr10 | 1.15E+08 | 1.15E+08 | 1111 | 1148 | 115100000 | -0.11964 | 0.044749152 |
| chr10 | 1.17E+08 | 1.17E+08 | 942  | 977  | 116700000 | -0.125   | 0.03802445  |
| chr10 | 1.17E+08 | 1.17E+08 | 962  | 1007 | 116750000 | -0.13833 | 0.024839667 |
| chr10 | 1.17E+08 | 1.17E+08 | 988  | 810  | 116900000 | 0.214217 | 0.001254592 |
| chr10 | 1.17E+08 | 1.17E+08 | 1000 | 825  | 116950000 | 0.205162 | 0.001891009 |
| chr10 | 1.17E+08 | 1.17E+08 | 972  | 813  | 117150000 | 0.185329 | 0.004418293 |
| chr10 | 1.17E+08 | 1.17E+08 | 973  | 786  | 117200000 | 0.235539 | 0.000451244 |
| chr10 | 1.17E+08 | 1.17E+08 | 882  | 718  | 117250000 | 0.224423 | 0.000776649 |
| chr10 | 1.17E+08 | 1.17E+08 | 867  | 740  | 117300000 | 0.156135 | 0.013601241 |
| chr10 | 1.17E+08 | 1.17E+08 | 966  | 821  | 117350000 | 0.162269 | 0.010872166 |
| chr10 | 1.17E+08 | 1.17E+08 | 1037 | 907  | 117400000 | 0.12087  | 0.043453738 |
| chr10 | 1.18E+08 | 1.18E+08 | 976  | 1028 | 117750000 | -0.14726 | 0.018350038 |
| chr10 | 1.18E+08 | 1.18E+08 | 1078 | 1128 | 117900000 | -0.13778 | 0.025291422 |
| chr10 | 1.18E+08 | 1.18E+08 | 1003 | 1036 | 118400000 | -0.11907 | 0.045504807 |
| chr10 | 1.19E+08 | 1.19E+08 | 960  | 1029 | 118900000 | -0.17251 | 0.007225558 |
| chr10 | 1.19E+08 | 1.19E+08 | 1007 | 1107 | 118950000 | -0.20896 | 0.001540473 |
| chr10 | 1.19E+08 | 1.19E+08 | 1058 | 1133 | 1.19E+08  | -0.17118 | 0.007610079 |
| chr10 | 1.19E+08 | 1.19E+08 | 1057 | 926  | 119100000 | 0.11852  | 0.046597167 |
| chr10 | 1.19E+08 | 1.19E+08 | 1040 | 880  | 119150000 | 0.168636 | 0.008557728 |
| chr10 | 1.2E+08  | 1.2E+08  | 992  | 1034 | 120150000 | -0.1322  | 0.030331968 |
| chr10 | 1.2E+08  | 1.21E+08 | 943  | 817  | 120450000 | 0.13455  | 0.028402158 |
| chr10 | 1.2E+08  | 1.21E+08 | 986  | 848  | 120500000 | 0.145152 | 0.019982705 |
| chr10 | 1.21E+08 | 1.21E+08 | 992  | 1024 | 120750000 | -0.11818 | 0.046735798 |
| chr10 | 1.21E+08 | 1.21E+08 | 765  | 792  | 120900000 | -0.12241 | 0.041159296 |
| chr10 | 1.21E+08 | 1.21E+08 | 987  | 1025 | 121250000 | -0.12687 | 0.035884853 |
| chr10 | 1.22E+08 | 1.22E+08 | 1028 | 1076 | 122150000 | -0.13821 | 0.024936133 |
| chr10 | 1.22E+08 | 1.22E+08 | 950  | 987  | 122200000 | -0.12749 | 0.035197112 |
| chr10 | 1.22E+08 | 1.22E+08 | 1006 | 1068 | 122350000 | -0.15865 | 0.012219182 |
| chr10 | 1.23E+08 | 1.23E+08 | 1008 | 1039 | 122550000 | -0.11607 | 0.049722064 |
| chr10 | 1.23E+08 | 1.23E+08 | 1029 | 1073 | 122850000 | -0.13278 | 0.029769668 |
| chr10 | 1.23E+08 | 1.23E+08 | 999  | 1083 | 122900000 | -0.18885 | 0.003721735 |
| chr10 | 1.24E+08 | 1.24E+08 | 860  | 892  | 123800000 | -0.12508 | 0.037936052 |
| chr10 | 1.24E+08 | 1.24E+08 | 1001 | 1051 | 124300000 | -0.14269 | 0.021459895 |
| chr10 | 1.24E+08 | 1.24E+08 | 714  | 741  | 124350000 | -0.12592 | 0.036961688 |
| chr10 | 1.25E+08 | 1.25E+08 | 892  | 936  | 124650000 | -0.14184 | 0.022089909 |
| chr10 | 1.25E+08 | 1.25E+08 | 1057 | 1128 | 125250000 | -0.16616 | 0.009229864 |
| chr10 | 1.25E+08 | 1.25E+08 | 1094 | 1140 | 125300000 | -0.13179 | 0.030725911 |
| chr10 | 1.25E+08 | 1.26E+08 | 1045 | 1098 | 125500000 | -0.14375 | 0.020704728 |
| chr10 | 1.26E+08 | 1.26E+08 | 1020 | 1081 | 125550000 | -0.15617 | 0.013377908 |

|       |          |          |      |      |           |          |             |
|-------|----------|----------|------|------|-----------|----------|-------------|
| chr10 | 1.26E+08 | 1.26E+08 | 1032 | 1150 | 125750000 | -0.22856 | 0.000608389 |
| chr10 | 1.26E+08 | 1.26E+08 | 1069 | 1156 | 125800000 | -0.18525 | 0.004324611 |
| chr10 | 1.26E+08 | 1.26E+08 | 743  | 790  | 125850000 | -0.16086 | 0.011262949 |
| chr10 | 1.26E+08 | 1.26E+08 | 548  | 569  | 125900000 | -0.12662 | 0.036164033 |
| chr10 | 1.26E+08 | 1.26E+08 | 994  | 1058 | 126050000 | -0.16239 | 0.010638941 |
| chr10 | 1.26E+08 | 1.26E+08 | 887  | 934  | 126100000 | -0.14686 | 0.018605337 |
| chr10 | 1.26E+08 | 1.26E+08 | 992  | 1103 | 126200000 | -0.22539 | 0.000710333 |
| chr10 | 1.26E+08 | 1.26E+08 | 1060 | 1249 | 126250000 | -0.30908 | 6.54E-06    |
| chr10 | 1.26E+08 | 1.26E+08 | 1117 | 1243 | 126300000 | -0.22657 | 0.000670791 |
| chr10 | 1.26E+08 | 1.26E+08 | 1153 | 1230 | 126350000 | -0.16564 | 0.009416045 |
| chr10 | 1.26E+08 | 1.26E+08 | 1125 | 1219 | 126400000 | -0.18814 | 0.003833334 |
| chr10 | 1.27E+08 | 1.27E+08 | 1021 | 889  | 126650000 | 0.127356 | 0.035661377 |
| chr10 | 1.27E+08 | 1.27E+08 | 974  | 1012 | 126850000 | -0.12759 | 0.035094954 |
| chr10 | 1.27E+08 | 1.27E+08 | 896  | 939  | 126900000 | -0.14    | 0.023496201 |
| chr10 | 1.27E+08 | 1.27E+08 | 1080 | 915  | 1.27E+08  | 0.166816 | 0.009170514 |
| chr10 | 1.27E+08 | 1.27E+08 | 1116 | 899  | 127050000 | 0.239572 | 0.000368584 |
| chr10 | 1.27E+08 | 1.27E+08 | 1005 | 1097 | 127200000 | -0.19874 | 0.002433798 |
| chr10 | 1.28E+08 | 1.28E+08 | 1057 | 1120 | 127900000 | -0.1559  | 0.013511377 |
| chr10 | 1.28E+08 | 1.28E+08 | 1063 | 1148 | 127950000 | -0.18335 | 0.004676872 |
| chr10 | 1.28E+08 | 1.28E+08 | 1039 | 1071 | 128300000 | -0.11613 | 0.049630743 |
| chr10 | 1.28E+08 | 1.29E+08 | 964  | 994  | 128450000 | -0.11658 | 0.048980571 |
| chr10 | 1.28E+08 | 1.29E+08 | 960  | 991  | 128500000 | -0.11822 | 0.046670816 |
| chr10 | 1.29E+08 | 1.29E+08 | 150  | 178  | 128650000 | -0.31929 | 3.39E-06    |
| chr10 | 1.29E+08 | 1.29E+08 | 789  | 836  | 128800000 | -0.15585 | 0.013533755 |
| chr10 | 1.29E+08 | 1.29E+08 | 1091 | 1140 | 128950000 | -0.13575 | 0.027032776 |
| chr10 | 1.3E+08  | 1.3E+08  | 866  | 901  | 129550000 | -0.12953 | 0.033015166 |
| chr10 | 1.3E+08  | 1.3E+08  | 933  | 986  | 129600000 | -0.15208 | 0.015491516 |
| chr10 | 1.3E+08  | 1.3E+08  | 1073 | 1119 | 129700000 | -0.13293 | 0.029623656 |
| chr10 | 1.3E+08  | 1.3E+08  | 1051 | 1096 | 130150000 | -0.13286 | 0.029695057 |
| chr10 | 1.3E+08  | 1.3E+08  | 1032 | 1069 | 130200000 | -0.12319 | 0.040196357 |
| chr10 | 1.3E+08  | 1.3E+08  | 1077 | 1126 | 130250000 | -0.13656 | 0.026328886 |
| chr10 | 1.3E+08  | 1.3E+08  | 1137 | 1176 | 130300000 | -0.12103 | 0.042919246 |
| chr10 | 1.31E+08 | 1.31E+08 | 1032 | 1069 | 130750000 | -0.12319 | 0.040196357 |
| chr10 | 1.31E+08 | 1.31E+08 | 1017 | 1083 | 130900000 | -0.16309 | 0.010367139 |
| chr10 | 1.31E+08 | 1.31E+08 | 1058 | 1119 | 131350000 | -0.15324 | 0.014864288 |
| chr10 | 1.31E+08 | 1.31E+08 | 1028 | 1130 | 131400000 | -0.20885 | 0.001548158 |
| chr10 | 1.32E+08 | 1.32E+08 | 1003 | 1107 | 131550000 | -0.21471 | 0.001181776 |
| chr10 | 1.32E+08 | 1.32E+08 | 1047 | 1183 | 131600000 | -0.24856 | 0.000219689 |
| chr10 | 1.32E+08 | 1.32E+08 | 1072 | 1150 | 131650000 | -0.1737  | 0.006895179 |
| chr10 | 1.32E+08 | 1.32E+08 | 1065 | 1144 | 131700000 | -0.17561 | 0.006395102 |
| chr10 | 1.32E+08 | 1.32E+08 | 1013 | 1084 | 131750000 | -0.1701  | 0.007935165 |
| chr10 | 1.32E+08 | 1.32E+08 | 1013 | 1078 | 131800000 | -0.16209 | 0.010758294 |
| chr10 | 1.32E+08 | 1.32E+08 | 921  | 967  | 131950000 | -0.14269 | 0.02146423  |
| chr10 | 1.32E+08 | 1.32E+08 | 1023 | 1131 | 1.32E+08  | -0.21716 | 0.001053053 |
| chr10 | 1.32E+08 | 1.32E+08 | 990  | 1072 | 132050000 | -0.18718 | 0.003991906 |
| chr10 | 1.32E+08 | 1.32E+08 | 899  | 946  | 132100000 | -0.14589 | 0.019238623 |
| chr10 | 1.32E+08 | 1.32E+08 | 949  | 1064 | 132150000 | -0.23739 | 0.000391499 |



|       |          |          |      |      |           |          |             |
|-------|----------|----------|------|------|-----------|----------|-------------|
| chr10 | 1.32E+08 | 1.32E+08 | 1020 | 1134 | 132200000 | -0.22522 | 0.000716198 |
| chr10 | 1.32E+08 | 1.32E+08 | 1064 | 1119 | 132250000 | -0.14508 | 0.019779874 |
| chr10 | 1.32E+08 | 1.33E+08 | 1011 | 1173 | 132500000 | -0.28679 | 2.57E-05    |
| chr10 | 1.33E+08 | 1.33E+08 | 1024 | 1287 | 132550000 | -0.40217 | 8.54E-09    |
| chr10 | 1.33E+08 | 1.33E+08 | 1064 | 1211 | 132600000 | -0.25907 | 0.000124988 |
| chr10 | 1.33E+08 | 1.33E+08 | 1076 | 1154 | 132650000 | -0.17334 | 0.006994543 |
| chr10 | 1.33E+08 | 1.33E+08 | 1045 | 1188 | 132700000 | -0.2574  | 0.000136874 |
| chr10 | 1.33E+08 | 1.33E+08 | 1050 | 1112 | 132750000 | -0.15514 | 0.013885554 |
| chr10 | 1.33E+08 | 1.33E+08 | 1035 | 1080 | 132850000 | -0.13377 | 0.028831366 |
| chr10 | 1.33E+08 | 1.33E+08 | 975  | 1033 | 132900000 | -0.15574 | 0.013588479 |
| chr10 | 1.33E+08 | 1.33E+08 | 996  | 1118 | 132950000 | -0.23907 | 0.000359346 |
| chr10 | 1.33E+08 | 1.33E+08 | 1092 | 1240 | 1.33E+08  | -0.25574 | 0.000149783 |
| chr10 | 1.33E+08 | 1.33E+08 | 1096 | 1181 | 133050000 | -0.18013 | 0.005333308 |
| chr10 | 1.33E+08 | 1.33E+08 | 1045 | 1102 | 133100000 | -0.14899 | 0.017274353 |
| chr10 | 1.33E+08 | 1.33E+08 | 1071 | 1145 | 133150000 | -0.16876 | 0.008356895 |
| chr10 | 1.33E+08 | 1.33E+08 | 1077 | 1143 | 133200000 | -0.15818 | 0.012433398 |
| chr10 | 1.33E+08 | 1.33E+08 | 999  | 1041 | 133300000 | -0.13179 | 0.030733381 |
| chr10 | 1.33E+08 | 1.34E+08 | 708  | 733  | 133450000 | -0.12244 | 0.041130375 |
| chr10 | 1.33E+08 | 1.34E+08 | 1016 | 1135 | 133500000 | -0.23216 | 0.000509108 |
| chr10 | 1.34E+08 | 1.34E+08 | 1099 | 1217 | 133550000 | -0.21951 | 0.000942439 |
| chr10 | 1.34E+08 | 1.34E+08 | 1145 | 1192 | 133600000 | -0.13041 | 0.032111468 |
| chr10 | 1.34E+08 | 1.34E+08 | 826  | 885  | 133650000 | -0.17191 | 0.007397339 |
| chr10 | 1.34E+08 | 1.34E+08 | 468  | 524  | 133700000 | -0.23543 | 0.000432274 |
| chr10 | 1.34E+08 | 1.34E+08 | 683  | 752  | 133750000 | -0.21122 | 0.001389119 |
| chr10 | 1.34E+08 | 1.34E+08 | 917  | 971  | 133800000 | -0.15492 | 0.013995065 |
| chr10 | 1.34E+08 | 1.34E+08 | 1002 | 1116 | 133950000 | -0.22783 | 0.000630782 |
| chr10 | 1.34E+08 | 1.34E+08 | 1070 | 1271 | 1.34E+08  | -0.32073 | 3.09E-06    |
| chr10 | 1.34E+08 | 1.34E+08 | 1022 | 1221 | 134050000 | -0.32904 | 1.78E-06    |
| chr10 | 1.34E+08 | 1.34E+08 | 998  | 1161 | 134100000 | -0.29063 | 2.04E-05    |
| chr10 | 1.34E+08 | 1.34E+08 | 978  | 1155 | 134150000 | -0.31236 | 5.31E-06    |
| chr10 | 1.34E+08 | 1.34E+08 | 1089 | 1273 | 134200000 | -0.2976  | 1.34E-05    |
| chr10 | 1.34E+08 | 1.34E+08 | 1205 | 1365 | 134250000 | -0.25224 | 0.000180739 |
| chr10 | 1.34E+08 | 1.34E+08 | 1103 | 1267 | 134300000 | -0.27236 | 5.96E-05    |
| chr10 | 1.34E+08 | 1.34E+08 | 997  | 1133 | 134350000 | -0.25685 | 0.000141015 |
| chr10 | 1.34E+08 | 1.34E+08 | 1058 | 1162 | 134400000 | -0.20764 | 0.001635979 |
| chr10 | 1.34E+08 | 1.35E+08 | 1054 | 1225 | 134450000 | -0.28928 | 2.22E-05    |
| chr10 | 1.34E+08 | 1.35E+08 | 1012 | 1232 | 134500000 | -0.35616 | 2.73E-07    |
| chr10 | 1.35E+08 | 1.35E+08 | 1098 | 1263 | 134550000 | -0.27435 | 5.32E-05    |
| chr10 | 1.35E+08 | 1.35E+08 | 1030 | 1162 | 134600000 | -0.24634 | 0.000246894 |
| chr10 | 1.35E+08 | 1.35E+08 | 984  | 1138 | 134650000 | -0.28214 | 3.38E-05    |
| chr10 | 1.35E+08 | 1.35E+08 | 1040 | 1176 | 134700000 | -0.24968 | 0.000207115 |
| chr10 | 1.35E+08 | 1.35E+08 | 1049 | 1170 | 134750000 | -0.22987 | 0.000570561 |
| chr10 | 1.35E+08 | 1.35E+08 | 1085 | 1174 | 134800000 | -0.18611 | 0.004173391 |
| chr10 | 1.35E+08 | 1.35E+08 | 1072 | 1203 | 134850000 | -0.2387  | 0.000366206 |
| chr10 | 1.35E+08 | 1.35E+08 | 1096 | 1316 | 134900000 | -0.33628 | 1.09E-06    |
| chr10 | 1.35E+08 | 1.35E+08 | 1047 | 1303 | 134950000 | -0.38795 | 2.59E-08    |
| chr10 | 1.35E+08 | 1.35E+08 | 982  | 1231 | 1.35E+08  | -0.39841 | 1.15E-08    |

|       |          |          |      |      |           |          |             |
|-------|----------|----------|------|------|-----------|----------|-------------|
| chr10 | 1.35E+08 | 1.35E+08 | 1032 | 1233 | 135050000 | -0.3291  | 1.78E-06    |
| chr10 | 1.35E+08 | 1.35E+08 | 953  | 1157 | 135100000 | -0.35221 | 3.62E-07    |
| chr10 | 1.35E+08 | 1.35E+08 | 938  | 1142 | 135150000 | -0.35627 | 2.71E-07    |
| chr10 | 1.35E+08 | 1.35E+08 | 866  | 983  | 135200000 | -0.2552  | 0.000154235 |
| chr10 | 1.35E+08 | 1.35E+08 | 817  | 852  | 135250000 | -0.13289 | 0.029664293 |
| chr10 | 1.35E+08 | 1.36E+08 | 408  | 430  | 135450000 | -0.14814 | 0.017797026 |
| chr10 | 1.35E+08 | 1.36E+08 | 148  | 193  | 135500000 | -0.45538 | 1.01E-10    |
| chr10 | 1.36E+08 | 1.36E+08 | 94   | 120  | 135550000 | -0.42467 | 1.38E-09    |
| chr5  | 200001   | 300000   | 448  | 508  | 250000    | -0.2537  | 0.00016714  |
| chr5  | 250001   | 350000   | 640  | 715  | 3.00E+05  | -0.23224 | 0.000507098 |
| chr5  | 300001   | 400000   | 967  | 1001 | 350000    | -0.12223 | 0.041392837 |
| chr5  | 350001   | 450000   | 1059 | 1117 | 4.00E+05  | -0.1493  | 0.017090659 |
| chr5  | 400001   | 500000   | 1049 | 1170 | 450000    | -0.22987 | 0.000570561 |
| chr5  | 450001   | 550000   | 1068 | 1186 | 5.00E+05  | -0.22356 | 0.000776091 |
| chr5  | 500001   | 600000   | 1060 | 1146 | 550000    | -0.18491 | 0.004385307 |
| chr5  | 550001   | 650000   | 965  | 1059 | 6.00E+05  | -0.20647 | 0.001724944 |
| chr5  | 600001   | 700000   | 818  | 950  | 650000    | -0.2882  | 2.36E-05    |
| chr5  | 650001   | 750000   | 476  | 569  | 7.00E+05  | -0.32984 | 1.69E-06    |
| chr5  | 700001   | 800000   | 396  | 447  | 750000    | -0.24715 | 0.000236652 |
| chr5  | 750001   | 850000   | 420  | 457  | 8.00E+05  | -0.19418 | 0.002967047 |
| chr5  | 800001   | 900000   | 637  | 660  | 850000    | -0.12354 | 0.03976471  |
| chr5  | 900001   | 1000000  | 1055 | 1132 | 950000    | -0.174   | 0.006813647 |
| chr5  | 950001   | 1050000  | 1048 | 1295 | 1.00E+06  | -0.37769 | 5.64E-08    |
| chr5  | 1000001  | 1100000  | 1007 | 1294 | 1050000   | -0.43415 | 6.26E-10    |
| chr5  | 1050001  | 1150000  | 1027 | 1291 | 1100000   | -0.40242 | 8.36E-09    |
| chr5  | 1100001  | 1200000  | 1065 | 1376 | 1150000   | -0.442   | 3.21E-10    |
| chr5  | 1150001  | 1250000  | 1086 | 1359 | 1200000   | -0.39589 | 1.40E-08    |
| chr5  | 1200001  | 1300000  | 1038 | 1202 | 1250000   | -0.284   | 3.03E-05    |
| chr5  | 1250001  | 1350000  | 914  | 1072 | 1300000   | -0.30241 | 9.94E-06    |
| chr5  | 1300001  | 1400000  | 937  | 1123 | 1350000   | -0.33361 | 1.31E-06    |
| chr5  | 1350001  | 1450000  | 1074 | 1240 | 1400000   | -0.27972 | 3.90E-05    |
| chr5  | 1400001  | 1500000  | 1098 | 1264 | 1450000   | -0.27549 | 4.98E-05    |
| chr5  | 1450001  | 1550000  | 1041 | 1185 | 1500000   | -0.25929 | 0.00012352  |
| chr5  | 1500001  | 1600000  | 792  | 898  | 1550000   | -0.25359 | 0.000168172 |
| chr5  | 1550001  | 1650000  | 482  | 524  | 1600000   | -0.19291 | 0.003133323 |
| chr5  | 1650001  | 1750000  | 959  | 1025 | 1700000   | -0.16839 | 0.008475959 |
| chr5  | 1700001  | 1800000  | 929  | 1063 | 1750000   | -0.26676 | 8.17E-05    |
| chr5  | 1750001  | 1850000  | 1026 | 1162 | 1800000   | -0.25195 | 0.000183542 |
| chr5  | 1800001  | 1900000  | 1059 | 1224 | 1850000   | -0.28127 | 3.56E-05    |
| chr5  | 1850001  | 1950000  | 1072 | 1204 | 1900000   | -0.2399  | 0.00034446  |
| chr5  | 2100001  | 2200000  | 1077 | 1155 | 2150000   | -0.17325 | 0.007019469 |
| chr5  | 2150001  | 2250000  | 1009 | 1102 | 2200000   | -0.19957 | 0.002346717 |
| chr5  | 2200001  | 2300000  | 1027 | 1071 | 2250000   | -0.13289 | 0.029659573 |
| chr5  | 2600001  | 2700000  | 1078 | 1129 | 2650000   | -0.13906 | 0.024242444 |
| chr5  | 2650001  | 2750000  | 1043 | 1165 | 2700000   | -0.23196 | 0.00051423  |
| chr5  | 2700001  | 2800000  | 1041 | 1128 | 2750000   | -0.18817 | 0.003829498 |
| chr5  | 2950001  | 3050000  | 1082 | 1121 | 3.00E+06  | -0.12346 | 0.039870356 |

|      |          |          |      |      |          |          |             |
|------|----------|----------|------|------|----------|----------|-------------|
| chr5 | 3000001  | 3100000  | 1059 | 1097 | 3050000  | -0.12323 | 0.040144846 |
| chr5 | 3300001  | 3400000  | 1129 | 1234 | 3350000  | -0.20067 | 0.002235782 |
| chr5 | 3550001  | 3650000  | 1087 | 1126 | 3600000  | -0.12323 | 0.040152253 |
| chr5 | 3650001  | 3750000  | 1038 | 897  | 3700000  | 0.138255 | 0.025173537 |
| chr5 | 4350001  | 4450000  | 1123 | 959  | 4400000  | 0.155383 | 0.013973313 |
| chr5 | 4600001  | 4700000  | 942  | 972  | 4650000  | -0.1176  | 0.047536553 |
| chr5 | 4850001  | 4950000  | 947  | 1018 | 4900000  | -0.17667 | 0.006129103 |
| chr5 | 4900001  | 5000000  | 990  | 1061 | 4950000  | -0.1723  | 0.007285873 |
| chr5 | 5300001  | 5400000  | 976  | 1027 | 5350000  | -0.14585 | 0.01926245  |
| chr5 | 6300001  | 6400000  | 1110 | 1148 | 6350000  | -0.12093 | 0.043039378 |
| chr5 | 6350001  | 6450000  | 1063 | 1126 | 6400000  | -0.15544 | 0.013737098 |
| chr5 | 6400001  | 6500000  | 1062 | 1106 | 6450000  | -0.13094 | 0.031574068 |
| chr5 | 6450001  | 6550000  | 1040 | 1095 | 6500000  | -0.14672 | 0.018696398 |
| chr5 | 6500001  | 6600000  | 983  | 1022 | 6550000  | -0.1285  | 0.034101877 |
| chr5 | 6650001  | 6750000  | 1079 | 1134 | 6700000  | -0.1441  | 0.020458636 |
| chr5 | 6700001  | 6800000  | 1101 | 1248 | 6750000  | -0.25318 | 0.000171921 |
| chr5 | 6750001  | 6850000  | 1054 | 1132 | 6800000  | -0.17537 | 0.006454891 |
| chr5 | 7950001  | 8050000  | 1041 | 904  | 8.00E+06 | 0.131204 | 0.03160877  |
| chr5 | 8000001  | 8100000  | 1037 | 870  | 8050000  | 0.180957 | 0.005278315 |
| chr5 | 9200001  | 9300000  | 912  | 956  | 9250000  | -0.14035 | 0.023222508 |
| chr5 | 10650001 | 10750000 | 1055 | 1164 | 10700000 | -0.21422 | 0.00120884  |
| chr5 | 10700001 | 10800000 | 1030 | 1063 | 10750000 | -0.11787 | 0.047161597 |
| chr5 | 10900001 | 11000000 | 993  | 1043 | 10950000 | -0.14325 | 0.021061094 |
| chr5 | 11300001 | 11400000 | 1014 | 1059 | 11350000 | -0.13502 | 0.027690947 |
| chr5 | 11500001 | 11600000 | 1101 | 964  | 11550000 | 0.119338 | 0.045482713 |
| chr5 | 11550001 | 11650000 | 1098 | 946  | 11600000 | 0.142594 | 0.021790036 |
| chr5 | 11600001 | 11700000 | 968  | 840  | 11650000 | 0.132246 | 0.030579221 |
| chr5 | 11950001 | 12050000 | 949  | 829  | 1.20E+07 | 0.122664 | 0.04117101  |
| chr5 | 12150001 | 12250000 | 983  | 848  | 12200000 | 0.140755 | 0.02317357  |
| chr5 | 12200001 | 12300000 | 1088 | 874  | 12250000 | 0.243602 | 0.00030028  |
| chr5 | 12250001 | 12350000 | 1063 | 858  | 12300000 | 0.23672  | 0.0004254   |
| chr5 | 12300001 | 12400000 | 1088 | 841  | 12350000 | 0.299129 | 1.34E-05    |
| chr5 | 12350001 | 12450000 | 1074 | 881  | 12400000 | 0.213408 | 0.001302196 |
| chr5 | 12450001 | 12550000 | 939  | 802  | 12500000 | 0.155151 | 0.014090085 |
| chr5 | 12500001 | 12600000 | 997  | 812  | 12550000 | 0.223742 | 0.000802359 |
| chr5 | 12800001 | 12900000 | 992  | 845  | 12850000 | 0.159017 | 0.012252786 |
| chr5 | 13000001 | 13100000 | 1036 | 901  | 13050000 | 0.129053 | 0.033823761 |
| chr5 | 13050001 | 13150000 | 1042 | 851  | 13100000 | 0.219752 | 0.000969439 |
| chr5 | 13100001 | 13200000 | 1033 | 819  | 13150000 | 0.262533 | 0.000110402 |
| chr5 | 13150001 | 13250000 | 1046 | 890  | 13200000 | 0.160634 | 0.011548432 |
| chr5 | 13200001 | 13300000 | 1062 | 923  | 13250000 | 0.130009 | 0.032823478 |
| chr5 | 13400001 | 13500000 | 944  | 979  | 13450000 | -0.12489 | 0.038152876 |
| chr5 | 14100001 | 14200000 | 1039 | 1081 | 14150000 | -0.12954 | 0.033003918 |
| chr5 | 14150001 | 14250000 | 1046 | 1100 | 14200000 | -0.14499 | 0.019841844 |
| chr5 | 14350001 | 14450000 | 1035 | 1082 | 14400000 | -0.13644 | 0.026431719 |
| chr5 | 14400001 | 14500000 | 1006 | 1109 | 14450000 | -0.213   | 0.00127931  |
| chr5 | 14450001 | 14550000 | 947  | 1050 | 14500000 | -0.22132 | 0.000864275 |

|      |          |          |      |      |          |          |             |
|------|----------|----------|------|------|----------|----------|-------------|
| chr5 | 14500001 | 14600000 | 923  | 1050 | 14550000 | -0.25836 | 0.000129949 |
| chr5 | 14550001 | 14650000 | 927  | 1006 | 14600000 | -0.19036 | 0.003491663 |
| chr5 | 15050001 | 15150000 | 963  | 1000 | 15100000 | -0.12676 | 0.036007465 |
| chr5 | 15100001 | 15200000 | 982  | 1054 | 15150000 | -0.17445 | 0.006694014 |
| chr5 | 15250001 | 15350000 | 943  | 791  | 15300000 | 0.181208 | 0.005225067 |
| chr5 | 15300001 | 15400000 | 1000 | 848  | 15350000 | 0.165492 | 0.009640027 |
| chr5 | 16400001 | 16500000 | 954  | 988  | 16450000 | -0.12289 | 0.040561808 |
| chr5 | 17550001 | 17650000 | 289  | 301  | 17600000 | -0.13107 | 0.031447269 |
| chr5 | 17950001 | 18050000 | 974  | 822  | 1.80E+07 | 0.172412 | 0.007400688 |
| chr5 | 18100001 | 18200000 | 1003 | 842  | 18150000 | 0.180058 | 0.005472671 |
| chr5 | 18150001 | 18250000 | 1000 | 802  | 18200000 | 0.245954 | 0.000266068 |
| chr5 | 18200001 | 18300000 | 996  | 854  | 18250000 | 0.149538 | 0.017179789 |
| chr5 | 18500001 | 18600000 | 894  | 933  | 18550000 | -0.13397 | 0.0286439   |
| chr5 | 18600001 | 18700000 | 940  | 772  | 18650000 | 0.211688 | 0.001408961 |
| chr5 | 18650001 | 18750000 | 882  | 764  | 18700000 | 0.134834 | 0.028142695 |
| chr5 | 18700001 | 18800000 | 941  | 825  | 18750000 | 0.117429 | 0.048116954 |
| chr5 | 18750001 | 18850000 | 954  | 810  | 18800000 | 0.163696 | 0.010310817 |
| chr5 | 18800001 | 18900000 | 972  | 809  | 18850000 | 0.192445 | 0.003284384 |
| chr5 | 18850001 | 18950000 | 994  | 825  | 18900000 | 0.19648  | 0.002765084 |
| chr5 | 18900001 | 19000000 | 1039 | 857  | 18950000 | 0.205457 | 0.001866357 |
| chr5 | 18950001 | 19050000 | 1061 | 880  | 1.90E+07 | 0.197477 | 0.002648747 |
| chr5 | 19000001 | 19100000 | 955  | 816  | 19050000 | 0.15456  | 0.01439117  |
| chr5 | 19150001 | 19250000 | 920  | 804  | 19200000 | 0.122067 | 0.041920121 |
| chr5 | 19200001 | 19300000 | 1014 | 873  | 19250000 | 0.143632 | 0.021040332 |
| chr5 | 19550001 | 19650000 | 1045 | 857  | 19600000 | 0.213764 | 0.001281063 |
| chr5 | 19600001 | 19700000 | 1083 | 889  | 19650000 | 0.212406 | 0.001363457 |
| chr5 | 19750001 | 19850000 | 975  | 854  | 19800000 | 0.118794 | 0.046220315 |
| chr5 | 19800001 | 19900000 | 1026 | 870  | 19850000 | 0.165572 | 0.009611213 |
| chr5 | 19850001 | 19950000 | 1082 | 902  | 19900000 | 0.190129 | 0.003620656 |
| chr5 | 19900001 | 20000000 | 1062 | 925  | 19950000 | 0.126887 | 0.036183395 |
| chr5 | 20050001 | 20150000 | 967  | 814  | 20100000 | 0.176115 | 0.006402269 |
| chr5 | 20100001 | 20200000 | 981  | 812  | 20150000 | 0.200402 | 0.002332818 |
| chr5 | 20150001 | 20250000 | 1042 | 868  | 20200000 | 0.191217 | 0.003459085 |
| chr5 | 20300001 | 20400000 | 1032 | 828  | 20350000 | 0.245369 | 0.000274226 |
| chr5 | 20350001 | 20450000 | 1023 | 799  | 20400000 | 0.284167 | 3.26E-05    |
| chr5 | 20400001 | 20500000 | 1037 | 858  | 20450000 | 0.200995 | 0.002273092 |
| chr5 | 20450001 | 20550000 | 1029 | 874  | 20500000 | 0.163166 | 0.010516192 |
| chr5 | 20700001 | 20800000 | 90   | 97   | 20750000 | -0.18043 | 0.005269155 |
| chr5 | 20900001 | 21000000 | 610  | 498  | 20950000 | 0.220292 | 0.000945119 |
| chr5 | 20950001 | 21050000 | 992  | 831  | 2.10E+07 | 0.18312  | 0.004835758 |
| chr5 | 21150001 | 21250000 | 1006 | 837  | 21200000 | 0.192959 | 0.003213648 |
| chr5 | 21200001 | 21300000 | 740  | 607  | 21250000 | 0.213457 | 0.001299285 |
| chr5 | 21250001 | 21350000 | 252  | 214  | 21300000 | 0.163441 | 0.010409045 |
| chr5 | 21300001 | 21400000 | 196  | 145  | 21350000 | 0.362429 | 2.05E-07    |
| chr5 | 21600001 | 21700000 | 1010 | 801  | 21650000 | 0.262109 | 0.000112979 |
| chr5 | 21650001 | 21750000 | 1034 | 900  | 21700000 | 0.127868 | 0.03509893  |
| chr5 | 21750001 | 21850000 | 1005 | 875  | 21800000 | 0.127469 | 0.035536504 |

|      |          |          |      |     |          |          |             |
|------|----------|----------|------|-----|----------|----------|-------------|
| chr5 | 21800001 | 21900000 | 1002 | 844 | 21850000 | 0.175196 | 0.006638285 |
| chr5 | 21850001 | 21950000 | 892  | 766 | 21900000 | 0.147328 | 0.018547012 |
| chr5 | 22300001 | 22400000 | 991  | 842 | 22350000 | 0.162693 | 0.010702635 |
| chr5 | 22350001 | 22450000 | 973  | 843 | 22400000 | 0.134535 | 0.028415461 |
| chr5 | 22400001 | 22500000 | 1002 | 875 | 22450000 | 0.123156 | 0.040562997 |
| chr5 | 22700001 | 22800000 | 1043 | 910 | 22750000 | 0.124429 | 0.03902235  |
| chr5 | 23200001 | 23300000 | 1014 | 867 | 23250000 | 0.153582 | 0.014901238 |
| chr5 | 23400001 | 23500000 | 1013 | 864 | 23450000 | 0.157159 | 0.013107982 |
| chr5 | 23450001 | 23550000 | 961  | 835 | 23500000 | 0.130388 | 0.032433825 |
| chr5 | 23600001 | 23700000 | 946  | 826 | 23650000 | 0.123327 | 0.040353453 |
| chr5 | 23750001 | 23850000 | 1055 | 917 | 23800000 | 0.129878 | 0.032959935 |
| chr5 | 23800001 | 23900000 | 998  | 838 | 23850000 | 0.179718 | 0.00554779  |
| chr5 | 23850001 | 23950000 | 889  | 772 | 23900000 | 0.131211 | 0.03160158  |
| chr5 | 23950001 | 24050000 | 1035 | 838 | 2.40E+07 | 0.232237 | 0.000531415 |
| chr5 | 24000001 | 24100000 | 1000 | 847 | 24050000 | 0.167194 | 0.009040034 |
| chr5 | 24100001 | 24200000 | 988  | 859 | 24150000 | 0.129481 | 0.033373055 |
| chr5 | 24500001 | 24600000 | 953  | 833 | 24550000 | 0.121788 | 0.042273159 |
| chr5 | 24550001 | 24650000 | 1008 | 863 | 24600000 | 0.151691 | 0.015931779 |
| chr5 | 24700001 | 24800000 | 971  | 838 | 24750000 | 0.140149 | 0.02364557  |
| chr5 | 24900001 | 25000000 | 1032 | 893 | 24950000 | 0.136339 | 0.026802176 |
| chr5 | 24950001 | 25050000 | 992  | 816 | 2.50E+07 | 0.209399 | 0.001563472 |
| chr5 | 25050001 | 25150000 | 881  | 773 | 25100000 | 0.116302 | 0.049728922 |
| chr5 | 25100001 | 25200000 | 868  | 738 | 25150000 | 0.161702 | 0.011102507 |
| chr5 | 25350001 | 25450000 | 976  | 836 | 25400000 | 0.151006 | 0.016319996 |
| chr5 | 25400001 | 25500000 | 954  | 793 | 25450000 | 0.194297 | 0.003036023 |
| chr5 | 25450001 | 25550000 | 932  | 781 | 25500000 | 0.182636 | 0.004931843 |
| chr5 | 25650001 | 25750000 | 1003 | 854 | 25700000 | 0.159642 | 0.011976266 |
| chr5 | 25700001 | 25800000 | 1122 | 933 | 25750000 | 0.193752 | 0.003107257 |
| chr5 | 25900001 | 26000000 | 1006 | 834 | 25950000 | 0.198139 | 0.002574031 |
| chr5 | 25950001 | 26050000 | 1043 | 851 | 2.60E+07 | 0.221136 | 0.000908156 |
| chr5 | 26100001 | 26200000 | 972  | 801 | 26150000 | 0.206782 | 0.001759014 |
| chr5 | 26700001 | 26800000 | 948  | 805 | 26750000 | 0.163527 | 0.010376006 |
| chr5 | 26750001 | 26850000 | 948  | 800 | 26800000 | 0.172515 | 0.007370965 |
| chr5 | 26800001 | 26900000 | 1009 | 854 | 26850000 | 0.168246 | 0.008685853 |
| chr5 | 26950001 | 27050000 | 974  | 848 | 2.70E+07 | 0.127486 | 0.035517835 |
| chr5 | 27100001 | 27200000 | 958  | 815 | 27150000 | 0.160854 | 0.011455378 |
| chr5 | 27150001 | 27250000 | 939  | 801 | 27200000 | 0.156951 | 0.013206897 |
| chr5 | 27200001 | 27300000 | 992  | 863 | 27250000 | 0.128608 | 0.034298238 |
| chr5 | 27250001 | 27350000 | 1072 | 912 | 27300000 | 0.160827 | 0.011466519 |
| chr5 | 27300001 | 27400000 | 1093 | 915 | 27350000 | 0.184078 | 0.004650567 |
| chr5 | 27450001 | 27550000 | 1023 | 894 | 27500000 | 0.122088 | 0.04189355  |
| chr5 | 27500001 | 27600000 | 1080 | 877 | 27550000 | 0.228011 | 0.000653331 |
| chr5 | 27550001 | 27650000 | 1045 | 836 | 27600000 | 0.249556 | 0.000220671 |
| chr5 | 27600001 | 27700000 | 930  | 772 | 27650000 | 0.196258 | 0.00279158  |
| chr5 | 27650001 | 27750000 | 921  | 805 | 27700000 | 0.121841 | 0.042206261 |
| chr5 | 27700001 | 27800000 | 989  | 849 | 27750000 | 0.147834 | 0.018225669 |
| chr5 | 27750001 | 27850000 | 1033 | 858 | 27800000 | 0.195419 | 0.002893891 |

|      |          |          |      |      |          |          |             |
|------|----------|----------|------|------|----------|----------|-------------|
| chr5 | 27800001 | 27900000 | 971  | 815  | 27850000 | 0.180299 | 0.005419792 |
| chr5 | 27850001 | 27950000 | 939  | 822  | 27900000 | 0.119615 | 0.045109837 |
| chr5 | 28100001 | 28200000 | 946  | 812  | 28150000 | 0.147989 | 0.018128637 |
| chr5 | 28300001 | 28400000 | 948  | 806  | 28350000 | 0.161735 | 0.011088981 |
| chr5 | 28600001 | 28700000 | 979  | 819  | 28650000 | 0.185074 | 0.004464871 |
| chr5 | 28650001 | 28750000 | 1022 | 861  | 28700000 | 0.174938 | 0.006705763 |
| chr5 | 28750001 | 28850000 | 852  | 733  | 28800000 | 0.144668 | 0.020314022 |
| chr5 | 28800001 | 28900000 | 907  | 793  | 28850000 | 0.12141  | 0.042755982 |
| chr5 | 29150001 | 29250000 | 1013 | 802  | 29200000 | 0.264588 | 9.87E-05    |
| chr5 | 29200001 | 29300000 | 1039 | 841  | 29250000 | 0.232646 | 0.000520804 |
| chr5 | 29650001 | 29750000 | 996  | 871  | 29700000 | 0.121101 | 0.043153512 |
| chr5 | 29700001 | 29800000 | 958  | 839  | 29750000 | 0.118983 | 0.045963035 |
| chr5 | 30250001 | 30350000 | 1046 | 916  | 30300000 | 0.119092 | 0.045815619 |
| chr5 | 30400001 | 30500000 | 876  | 768  | 30450000 | 0.117453 | 0.048083151 |
| chr5 | 30500001 | 30600000 | 1048 | 879  | 30550000 | 0.181332 | 0.00519908  |
| chr5 | 30550001 | 30650000 | 1080 | 893  | 30600000 | 0.201927 | 0.002181932 |
| chr5 | 31300001 | 31400000 | 944  | 994  | 31350000 | -0.14683 | 0.018624313 |
| chr5 | 32700001 | 32800000 | 949  | 815  | 32750000 | 0.147236 | 0.018605424 |
| chr5 | 33000001 | 33100000 | 997  | 873  | 33050000 | 0.11924  | 0.045614476 |
| chr5 | 33050001 | 33150000 | 961  | 812  | 33100000 | 0.170685 | 0.007911507 |
| chr5 | 34100001 | 34200000 | 96   | 80   | 34150000 | 0.190663 | 0.003540577 |
| chr5 | 34150001 | 34250000 | 78   | 52   | 34200000 | 0.512591 | 8.10E-13    |
| chr5 | 34200001 | 34300000 | 60   | 63   | 34250000 | -0.14276 | 0.02141004  |
| chr5 | 34250001 | 34350000 | 104  | 89   | 34300000 | 0.152335 | 0.015574543 |
| chr5 | 34300001 | 34400000 | 124  | 86   | 34350000 | 0.45556  | 1.36E-10    |
| chr5 | 35350001 | 35450000 | 846  | 898  | 35400000 | -0.15843 | 0.012319773 |
| chr5 | 35950001 | 36050000 | 1057 | 906  | 3.60E+07 | 0.150021 | 0.016892961 |
| chr5 | 36800001 | 36900000 | 1038 | 870  | 36850000 | 0.182347 | 0.00498985  |
| chr5 | 36850001 | 36950000 | 1036 | 885  | 36900000 | 0.154903 | 0.014215827 |
| chr5 | 37550001 | 37650000 | 945  | 804  | 37600000 | 0.160747 | 0.011500459 |
| chr5 | 37600001 | 37700000 | 843  | 710  | 37650000 | 0.175342 | 0.006600301 |
| chr5 | 37650001 | 37750000 | 859  | 751  | 37700000 | 0.121473 | 0.042674519 |
| chr5 | 37750001 | 37850000 | 954  | 984  | 37800000 | -0.11704 | 0.048328043 |
| chr5 | 38500001 | 38600000 | 1095 | 938  | 38550000 | 0.150899 | 0.016381462 |
| chr5 | 38550001 | 38650000 | 1042 | 898  | 38600000 | 0.142196 | 0.022083432 |
| chr5 | 38800001 | 38900000 | 956  | 1009 | 38850000 | -0.15022 | 0.016548941 |
| chr5 | 38850001 | 38950000 | 985  | 1032 | 38900000 | -0.13962 | 0.023795386 |
| chr5 | 39600001 | 39700000 | 1046 | 870  | 39650000 | 0.193424 | 0.003150894 |
| chr5 | 39650001 | 39750000 | 1004 | 857  | 39700000 | 0.15602  | 0.0136574   |
| chr5 | 39700001 | 39800000 | 967  | 840  | 39750000 | 0.130755 | 0.032060869 |
| chr5 | 39750001 | 39850000 | 1000 | 843  | 39800000 | 0.174024 | 0.006950325 |
| chr5 | 39800001 | 39900000 | 1091 | 919  | 39850000 | 0.175143 | 0.006652192 |
| chr5 | 40050001 | 40150000 | 938  | 795  | 40100000 | 0.166261 | 0.009364708 |
| chr5 | 40700001 | 40800000 | 925  | 796  | 40750000 | 0.144313 | 0.020560637 |
| chr5 | 41600001 | 41700000 | 1014 | 887  | 41650000 | 0.12068  | 0.043701048 |
| chr5 | 41950001 | 42050000 | 947  | 828  | 4.20E+07 | 0.121362 | 0.04281764  |
| chr5 | 42150001 | 42250000 | 975  | 841  | 42200000 | 0.140925 | 0.023043185 |

|      |          |          |      |      |          |          |             |
|------|----------|----------|------|------|----------|----------|-------------|
| chr5 | 42200001 | 42300000 | 945  | 828  | 42250000 | 0.118312 | 0.046883588 |
| chr5 | 43150001 | 43250000 | 915  | 736  | 43200000 | 0.241694 | 0.000330989 |
| chr5 | 43200001 | 43300000 | 931  | 803  | 43250000 | 0.141009 | 0.022978126 |
| chr5 | 43450001 | 43550000 | 885  | 749  | 43500000 | 0.16834  | 0.008654963 |
| chr5 | 43500001 | 43600000 | 949  | 804  | 43550000 | 0.166841 | 0.009161871 |
| chr5 | 43550001 | 43650000 | 1012 | 849  | 43600000 | 0.181001 | 0.005268913 |
| chr5 | 43600001 | 43700000 | 957  | 835  | 43650000 | 0.124371 | 0.039091459 |
| chr5 | 43850001 | 43950000 | 1030 | 899  | 43900000 | 0.12388  | 0.039681219 |
| chr5 | 43900001 | 44000000 | 822  | 696  | 43950000 | 0.167679 | 0.008875224 |
| chr5 | 43950001 | 44050000 | 769  | 667  | 4.40E+07 | 0.132925 | 0.029923546 |
| chr5 | 44550001 | 44650000 | 931  | 809  | 44600000 | 0.13027  | 0.032555511 |
| chr5 | 44800001 | 44900000 | 1044 | 897  | 44850000 | 0.14657  | 0.019036478 |
| chr5 | 44850001 | 44950000 | 1039 | 895  | 44900000 | 0.142864 | 0.02159283  |
| chr5 | 45300001 | 45400000 | 872  | 752  | 45350000 | 0.141224 | 0.022814339 |
| chr5 | 45350001 | 45450000 | 975  | 834  | 45400000 | 0.152983 | 0.015221297 |
| chr5 | 45400001 | 45500000 | 995  | 838  | 45450000 | 0.175375 | 0.006591827 |
| chr5 | 45450001 | 45550000 | 956  | 761  | 45500000 | 0.256742 | 0.000150922 |
| chr5 | 45500001 | 45600000 | 907  | 742  | 45550000 | 0.217312 | 0.001086897 |
| chr5 | 45850001 | 45950000 | 744  | 649  | 45900000 | 0.124712 | 0.038685945 |
| chr5 | 46100001 | 46200000 | 725  | 634  | 46150000 | 0.121126 | 0.043121033 |
| chr5 | 46150001 | 46250000 | 801  | 669  | 46200000 | 0.187424 | 0.004052568 |
| chr5 | 49800001 | 49900000 | 584  | 511  | 49850000 | 0.120273 | 0.044234652 |
| chr5 | 49850001 | 49950000 | 523  | 440  | 49900000 | 0.176936 | 0.006198027 |
| chr5 | 49900001 | 50000000 | 547  | 429  | 49950000 | 0.278191 | 4.61E-05    |
| chr5 | 49950001 | 50050000 | 893  | 772  | 5.00E+07 | 0.137688 | 0.025646866 |
| chr5 | 50300001 | 50400000 | 1074 | 904  | 50350000 | 0.176228 | 0.00637398  |
| chr5 | 50350001 | 50450000 | 1035 | 890  | 50400000 | 0.145382 | 0.019826509 |
| chr5 | 50500001 | 50600000 | 972  | 829  | 50550000 | 0.157212 | 0.013082764 |
| chr5 | 50800001 | 50900000 | 1091 | 945  | 50850000 | 0.134893 | 0.028089239 |
| chr5 | 50850001 | 50950000 | 1045 | 828  | 50900000 | 0.263428 | 0.000105138 |
| chr5 | 50900001 | 51000000 | 976  | 766  | 50950000 | 0.277165 | 4.88E-05    |
| chr5 | 50950001 | 51050000 | 983  | 834  | 5.10E+07 | 0.164772 | 0.009904056 |
| chr5 | 51100001 | 51200000 | 1017 | 862  | 51150000 | 0.166188 | 0.009390592 |
| chr5 | 51150001 | 51250000 | 996  | 812  | 51200000 | 0.222294 | 0.000859647 |
| chr5 | 51200001 | 51300000 | 1033 | 841  | 51250000 | 0.224291 | 0.000781582 |
| chr5 | 51250001 | 51350000 | 1050 | 920  | 51300000 | 0.118312 | 0.046883588 |
| chr5 | 51350001 | 51450000 | 916  | 772  | 51400000 | 0.174375 | 0.006855471 |
| chr5 | 51450001 | 51550000 | 905  | 764  | 51500000 | 0.171973 | 0.007527491 |
| chr5 | 51500001 | 51600000 | 927  | 778  | 51550000 | 0.180427 | 0.005391993 |
| chr5 | 51700001 | 51800000 | 1078 | 915  | 51750000 | 0.164142 | 0.010140516 |
| chr5 | 51750001 | 51850000 | 977  | 828  | 51800000 | 0.166356 | 0.009331284 |
| chr5 | 51800001 | 51900000 | 978  | 817  | 51850000 | 0.187127 | 0.004102812 |
| chr5 | 51850001 | 51950000 | 1006 | 827  | 51900000 | 0.210299 | 0.001500951 |
| chr5 | 52500001 | 52600000 | 925  | 808  | 52550000 | 0.122726 | 0.041093814 |
| chr5 | 52700001 | 52800000 | 965  | 1001 | 52750000 | -0.12521 | 0.037779584 |
| chr5 | 53600001 | 53700000 | 1050 | 876  | 53650000 | 0.189015 | 0.003793331 |
| chr5 | 54000001 | 54100000 | 1130 | 967  | 54050000 | 0.152363 | 0.015558768 |

|      |          |          |      |      |          |          |             |
|------|----------|----------|------|------|----------|----------|-------------|
| chr5 | 54050001 | 54150000 | 980  | 857  | 54100000 | 0.121115 | 0.043136035 |
| chr5 | 54450001 | 54550000 | 959  | 1004 | 54500000 | -0.13853 | 0.024674233 |
| chr5 | 54550001 | 54650000 | 1036 | 866  | 54600000 | 0.186213 | 0.004260494 |
| chr5 | 54600001 | 54700000 | 1024 | 884  | 54650000 | 0.139726 | 0.023980253 |
| chr5 | 54650001 | 54750000 | 1038 | 873  | 54700000 | 0.177381 | 0.006089561 |
| chr5 | 54900001 | 55000000 | 934  | 788  | 54950000 | 0.172855 | 0.007274272 |
| chr5 | 54950001 | 55050000 | 940  | 792  | 5.50E+07 | 0.174789 | 0.00674527  |
| chr5 | 55000001 | 55100000 | 938  | 820  | 55050000 | 0.121592 | 0.042522557 |
| chr5 | 55250001 | 55350000 | 810  | 865  | 55300000 | -0.16715 | 0.008889299 |
| chr5 | 55350001 | 55450000 | 955  | 831  | 55400000 | 0.12828  | 0.034650374 |
| chr5 | 55450001 | 55550000 | 894  | 767  | 55500000 | 0.148676 | 0.017701986 |
| chr5 | 55850001 | 55950000 | 1067 | 932  | 55900000 | 0.122787 | 0.041019023 |
| chr5 | 56200001 | 56300000 | 1055 | 925  | 56250000 | 0.117346 | 0.048234045 |
| chr5 | 56500001 | 56600000 | 920  | 789  | 56550000 | 0.149237 | 0.017360803 |
| chr5 | 57400001 | 57500000 | 995  | 862  | 57450000 | 0.134637 | 0.028322587 |
| chr5 | 57450001 | 57550000 | 970  | 835  | 57500000 | 0.143837 | 0.020895292 |
| chr5 | 57650001 | 57750000 | 962  | 802  | 57700000 | 0.190063 | 0.003630757 |
| chr5 | 57750001 | 57850000 | 900  | 928  | 57800000 | -0.11657 | 0.048999121 |
| chr5 | 57900001 | 58000000 | 871  | 924  | 57950000 | -0.15759 | 0.012703096 |
| chr5 | 58300001 | 58400000 | 1047 | 896  | 58350000 | 0.152319 | 0.015583062 |
| chr5 | 58350001 | 58450000 | 1058 | 906  | 58400000 | 0.151385 | 0.016104501 |
| chr5 | 59600001 | 59700000 | 1027 | 890  | 59650000 | 0.134187 | 0.028736089 |
| chr5 | 59700001 | 59800000 | 886  | 924  | 59750000 | -0.13296 | 0.029598697 |
| chr5 | 60200001 | 60300000 | 949  | 819  | 60250000 | 0.140173 | 0.023627054 |
| chr5 | 61400001 | 61500000 | 932  | 973  | 61450000 | -0.13448 | 0.028176623 |
| chr5 | 61500001 | 61600000 | 651  | 525  | 61550000 | 0.237968 | 0.0003996   |
| chr5 | 61800001 | 61900000 | 916  | 800  | 61850000 | 0.122976 | 0.040784753 |
| chr5 | 61850001 | 61950000 | 1023 | 844  | 61900000 | 0.205119 | 0.00189461  |
| chr5 | 62100001 | 62200000 | 781  | 674  | 62150000 | 0.140202 | 0.023604049 |
| chr5 | 62350001 | 62450000 | 1044 | 866  | 62400000 | 0.197311 | 0.002667846 |
| chr5 | 62400001 | 62500000 | 1041 | 861  | 62450000 | 0.201513 | 0.002221999 |
| chr5 | 62600001 | 62700000 | 905  | 787  | 62650000 | 0.129182 | 0.033687191 |
| chr5 | 62650001 | 62750000 | 991  | 856  | 62700000 | 0.138902 | 0.024642055 |
| chr5 | 62800001 | 62900000 | 847  | 738  | 62850000 | 0.126369 | 0.036766429 |
| chr5 | 63100001 | 63200000 | 1006 | 862  | 63150000 | 0.150499 | 0.01661295  |
| chr5 | 63150001 | 63250000 | 1030 | 859  | 63200000 | 0.189543 | 0.00371067  |
| chr5 | 63550001 | 63650000 | 942  | 813  | 63600000 | 0.1401   | 0.023684351 |
| chr5 | 64600001 | 64700000 | 973  | 835  | 64650000 | 0.148292 | 0.017939515 |
| chr5 | 64650001 | 64750000 | 900  | 739  | 64700000 | 0.211979 | 0.001390371 |
| chr5 | 64800001 | 64900000 | 1016 | 877  | 64850000 | 0.13988  | 0.023857953 |
| chr5 | 64850001 | 64950000 | 984  | 858  | 64900000 | 0.125309 | 0.037985686 |
| chr5 | 65000001 | 65100000 | 959  | 830  | 65050000 | 0.136048 | 0.0270575   |
| chr5 | 66350001 | 66450000 | 1096 | 936  | 66400000 | 0.155296 | 0.014017374 |
| chr5 | 68500001 | 68600000 | 843  | 731  | 68550000 | 0.133289 | 0.029576588 |
| chr5 | 68550001 | 68650000 | 817  | 693  | 68600000 | 0.165109 | 0.009779775 |
| chr5 | 68650001 | 68750000 | 802  | 698  | 68700000 | 0.128003 | 0.034950774 |
| chr5 | 68850001 | 68950000 | 5    | 7    | 68900000 | -0.5578  | 5.82E-15    |



|      |          |          |      |      |          |          |             |
|------|----------|----------|------|------|----------|----------|-------------|
| chr5 | 68900001 | 69000000 | 2    | 3    | 68950000 | -0.65733 | 1.11E-19    |
| chr5 | 69000001 | 69100000 | 3    | 1    | 69050000 | 1.512591 | 1.57E-69    |
| chr5 | 69050001 | 69150000 | 5    | 2    | 69100000 | 1.249556 | 2.09E-53    |
| chr5 | 69150001 | 69250000 | 6    | 2    | 69200000 | 1.512591 | 1.57E-69    |
| chr5 | 69200001 | 69300000 | 12   | 4    | 69250000 | 1.512591 | 1.57E-69    |
| chr5 | 69250001 | 69350000 | 10   | 11   | 69300000 | -0.20988 | 0.001477547 |
| chr5 | 69300001 | 69400000 | 6    | 11   | 69350000 | -0.94684 | 5.75E-36    |
| chr5 | 69350001 | 69450000 | 5    | 8    | 69400000 | -0.75044 | 1.48E-24    |
| chr5 | 69400001 | 69500000 | 5    | 7    | 69450000 | -0.5578  | 5.82E-15    |
| chr5 | 69550001 | 69650000 | 4    | 1    | 69600000 | 1.927628 | 4.39E-93    |
| chr5 | 69600001 | 69700000 | 5    | 2    | 69650000 | 1.249556 | 2.09E-53    |
| chr5 | 69650001 | 69750000 | 7    | 8    | 69700000 | -0.26502 | 9.01E-05    |
| chr5 | 69700001 | 69800000 | 6    | 7    | 69750000 | -0.29476 | 1.59E-05    |
| chr5 | 70000001 | 70100000 | 2    | 3    | 70050000 | -0.65733 | 1.11E-19    |
| chr5 | 70100001 | 70200000 | 1    | 4    | 70150000 | -2.07237 | 5.62E-105   |
| chr5 | 70150001 | 70250000 | 3    | 5    | 70200000 | -0.80934 | 7.76E-28    |
| chr5 | 70200001 | 70300000 | 3    | 2    | 70250000 | 0.512591 | 8.10E-13    |
| chr5 | 70250001 | 70350000 | 52   | 67   | 70300000 | -0.43802 | 4.51E-10    |
| chr5 | 70300001 | 70400000 | 60   | 73   | 70350000 | -0.35531 | 2.90E-07    |
| chr5 | 70350001 | 70450000 | 10   | 11   | 70400000 | -0.20988 | 0.001477547 |
| chr5 | 70400001 | 70500000 | 2    | 8    | 70450000 | -2.07237 | 5.62E-105   |
| chr5 | 70450001 | 70550000 | 2    | 5    | 70500000 | -1.3943  | 1.23E-64    |
| chr5 | 70500001 | 70600000 | 4    | 3    | 70550000 | 0.342666 | 8.12E-07    |
| chr5 | 70550001 | 70650000 | 13   | 11   | 70600000 | 0.168636 | 0.008557728 |
| chr5 | 70650001 | 70750000 | 136  | 144  | 70700000 | -0.15483 | 0.014039201 |
| chr5 | 71100001 | 71200000 | 1017 | 1051 | 71150000 | -0.11981 | 0.044510147 |
| chr5 | 71600001 | 71700000 | 1003 | 1034 | 71650000 | -0.11629 | 0.049410659 |
| chr5 | 72100001 | 72200000 | 1000 | 874  | 72150000 | 0.121923 | 0.042101691 |
| chr5 | 72500001 | 72600000 | 1042 | 1116 | 72550000 | -0.17135 | 0.007558849 |
| chr5 | 72850001 | 72950000 | 1045 | 913  | 72900000 | 0.122444 | 0.041445259 |
| chr5 | 73600001 | 73700000 | 1013 | 1074 | 73650000 | -0.15673 | 0.013107519 |
| chr5 | 73650001 | 73750000 | 1044 | 1098 | 73700000 | -0.14513 | 0.01974973  |
| chr5 | 74500001 | 74600000 | 699  | 737  | 74550000 | -0.14874 | 0.017425485 |
| chr5 | 74600001 | 74700000 | 967  | 836  | 74650000 | 0.137641 | 0.025685898 |
| chr5 | 75000001 | 75100000 | 743  | 780  | 75050000 | -0.14248 | 0.021612159 |
| chr5 | 75050001 | 75150000 | 684  | 707  | 75100000 | -0.12009 | 0.044150728 |
| chr5 | 75300001 | 75400000 | 976  | 854  | 75350000 | 0.120273 | 0.044234652 |
| chr5 | 75650001 | 75750000 | 840  | 872  | 75700000 | -0.12631 | 0.036518347 |
| chr5 | 76000001 | 76100000 | 954  | 790  | 76050000 | 0.199765 | 0.002398546 |
| chr5 | 76700001 | 76800000 | 889  | 780  | 76750000 | 0.116338 | 0.049677219 |
| chr5 | 76750001 | 76850000 | 840  | 710  | 76800000 | 0.170199 | 0.008060911 |
| chr5 | 77300001 | 77400000 | 992  | 868  | 77350000 | 0.120273 | 0.044234652 |
| chr5 | 77350001 | 77450000 | 952  | 796  | 77400000 | 0.185821 | 0.004329812 |
| chr5 | 77400001 | 77500000 | 921  | 778  | 77450000 | 0.171059 | 0.007798206 |
| chr5 | 78150001 | 78250000 | 872  | 748  | 78200000 | 0.148918 | 0.017554166 |
| chr5 | 78400001 | 78500000 | 881  | 767  | 78450000 | 0.127544 | 0.035454002 |
| chr5 | 78700001 | 78800000 | 935  | 802  | 78750000 | 0.148992 | 0.017508944 |

|      |          |          |      |      |          |          |             |
|------|----------|----------|------|------|----------|----------|-------------|
| chr5 | 79150001 | 79250000 | 891  | 958  | 79200000 | -0.17697 | 0.006056391 |
| chr5 | 79300001 | 79400000 | 985  | 1021 | 79350000 | -0.12416 | 0.039023819 |
| chr5 | 79550001 | 79650000 | 772  | 668  | 79600000 | 0.136381 | 0.026765671 |
| chr5 | 79750001 | 79850000 | 845  | 723  | 79800000 | 0.152584 | 0.015437871 |
| chr5 | 79800001 | 79900000 | 881  | 699  | 79850000 | 0.261478 | 0.000116926 |
| chr5 | 79850001 | 79950000 | 897  | 778  | 79900000 | 0.132966 | 0.029884346 |
| chr5 | 80850001 | 80950000 | 953  | 827  | 80900000 | 0.132217 | 0.030607323 |
| chr5 | 80900001 | 81000000 | 957  | 820  | 80950000 | 0.150523 | 0.016598718 |
| chr5 | 81250001 | 81350000 | 857  | 740  | 81300000 | 0.139398 | 0.024241737 |
| chr5 | 81300001 | 81400000 | 935  | 759  | 81350000 | 0.228495 | 0.000638161 |
| chr5 | 81350001 | 81450000 | 885  | 757  | 81400000 | 0.153012 | 0.015205491 |
| chr5 | 82300001 | 82400000 | 1070 | 937  | 82350000 | 0.119118 | 0.045779679 |
| chr5 | 82350001 | 82450000 | 982  | 859  | 82400000 | 0.120693 | 0.043683745 |
| chr5 | 82400001 | 82500000 | 1038 | 827  | 82450000 | 0.255475 | 0.000161482 |
| chr5 | 82450001 | 82550000 | 1108 | 923  | 82500000 | 0.191184 | 0.003463892 |
| chr5 | 82650001 | 82750000 | 1042 | 912  | 82700000 | 0.119878 | 0.04475882  |
| chr5 | 83150001 | 83250000 | 1006 | 848  | 83200000 | 0.174122 | 0.006923565 |
| chr5 | 83200001 | 83300000 | 1112 | 869  | 83250000 | 0.283357 | 3.42E-05    |
| chr5 | 83250001 | 83350000 | 1083 | 870  | 83300000 | 0.243574 | 0.000300702 |
| chr5 | 83350001 | 83450000 | 996  | 849  | 83400000 | 0.158009 | 0.012710379 |
| chr5 | 83400001 | 83500000 | 1090 | 863  | 83450000 | 0.264524 | 9.90E-05    |
| chr5 | 83450001 | 83550000 | 1001 | 877  | 83500000 | 0.118421 | 0.046732194 |
| chr5 | 83700001 | 83800000 | 1062 | 899  | 83750000 | 0.168019 | 0.008761374 |
| chr5 | 83750001 | 83850000 | 1054 | 854  | 83800000 | 0.231195 | 0.000559333 |
| chr5 | 83800001 | 83900000 | 1004 | 880  | 83850000 | 0.117812 | 0.047578463 |
| chr5 | 84300001 | 84400000 | 1065 | 883  | 84350000 | 0.197996 | 0.002590004 |
| chr5 | 84350001 | 84450000 | 1071 | 854  | 84400000 | 0.254279 | 0.00017209  |
| chr5 | 84400001 | 84500000 | 1051 | 870  | 84450000 | 0.200304 | 0.00234283  |
| chr5 | 84450001 | 84550000 | 1038 | 836  | 84500000 | 0.23986  | 0.000363265 |
| chr5 | 84500001 | 84600000 | 1043 | 857  | 84550000 | 0.211    | 0.001453856 |
| chr5 | 84550001 | 84650000 | 1080 | 851  | 84600000 | 0.271429 | 6.75E-05    |
| chr5 | 84600001 | 84700000 | 1025 | 807  | 84650000 | 0.272612 | 6.32E-05    |
| chr5 | 84650001 | 84750000 | 938  | 784  | 84700000 | 0.186362 | 0.00423437  |
| chr5 | 84700001 | 84800000 | 963  | 802  | 84750000 | 0.191562 | 0.003409155 |
| chr5 | 84750001 | 84850000 | 1014 | 836  | 84800000 | 0.206111 | 0.001812649 |
| chr5 | 84800001 | 84900000 | 970  | 815  | 84850000 | 0.178813 | 0.005752274 |
| chr5 | 84950001 | 85050000 | 933  | 764  | 8.50E+07 | 0.215933 | 0.001158905 |
| chr5 | 85000001 | 85100000 | 945  | 798  | 85050000 | 0.171554 | 0.007650693 |
| chr5 | 85100001 | 85200000 | 1058 | 861  | 85150000 | 0.224883 | 0.000759728 |
| chr5 | 85150001 | 85250000 | 1066 | 858  | 85200000 | 0.240786 | 0.000346617 |
| chr5 | 85200001 | 85300000 | 1020 | 855  | 85250000 | 0.182201 | 0.005019524 |
| chr5 | 85250001 | 85350000 | 1044 | 849  | 85300000 | 0.225913 | 0.000723016 |
| chr5 | 85300001 | 85400000 | 1026 | 843  | 85350000 | 0.211054 | 0.001450275 |
| chr5 | 85350001 | 85450000 | 1005 | 863  | 85400000 | 0.147391 | 0.018506334 |
| chr5 | 85400001 | 85500000 | 1031 | 855  | 85450000 | 0.197676 | 0.002626101 |
| chr5 | 85450001 | 85550000 | 1009 | 806  | 85500000 | 0.251703 | 0.000197184 |
| chr5 | 85500001 | 85600000 | 648  | 510  | 85550000 | 0.273125 | 6.14E-05    |

|      |          |          |      |     |          |          |             |
|------|----------|----------|------|-----|----------|----------|-------------|
| chr5 | 85550001 | 85650000 | 656  | 519 | 85600000 | 0.26559  | 9.34E-05    |
| chr5 | 85600001 | 85700000 | 1022 | 868 | 85650000 | 0.163256 | 0.010480862 |
| chr5 | 85650001 | 85750000 | 1050 | 907 | 85700000 | 0.138843 | 0.02469039  |
| chr5 | 85700001 | 85800000 | 972  | 845 | 85750000 | 0.129633 | 0.033214096 |
| chr5 | 86100001 | 86200000 | 1029 | 884 | 86150000 | 0.146753 | 0.018917305 |
| chr5 | 86150001 | 86250000 | 1020 | 847 | 86200000 | 0.195764 | 0.002851477 |
| chr5 | 86500001 | 86600000 | 966  | 835 | 86550000 | 0.137875 | 0.025489447 |
| chr5 | 87100001 | 87200000 | 1014 | 864 | 87150000 | 0.158583 | 0.012448255 |
| chr5 | 87150001 | 87250000 | 998  | 850 | 87200000 | 0.159205 | 0.012168924 |
| chr5 | 87200001 | 87300000 | 984  | 823 | 87250000 | 0.185394 | 0.004406529 |
| chr5 | 87250001 | 87350000 | 938  | 784 | 87300000 | 0.186362 | 0.00423437  |
| chr5 | 87400001 | 87500000 | 918  | 797 | 87450000 | 0.131543 | 0.031270778 |
| chr5 | 87450001 | 87550000 | 928  | 804 | 87500000 | 0.134558 | 0.028395187 |
| chr5 | 87650001 | 87750000 | 1056 | 921 | 87700000 | 0.124965 | 0.038388105 |
| chr5 | 87800001 | 87900000 | 1082 | 940 | 87850000 | 0.130596 | 0.032222026 |
| chr5 | 87850001 | 87950000 | 1000 | 857 | 87900000 | 0.150261 | 0.016751625 |
| chr5 | 88100001 | 88200000 | 1010 | 882 | 88150000 | 0.123133 | 0.040591101 |
| chr5 | 88950001 | 89050000 | 1034 | 889 | 8.90E+07 | 0.145609 | 0.019673242 |
| chr5 | 89000001 | 89100000 | 978  | 846 | 89050000 | 0.136805 | 0.026398157 |
| chr5 | 89100001 | 89200000 | 1082 | 916 | 89150000 | 0.167909 | 0.008798019 |
| chr5 | 89150001 | 89250000 | 1130 | 975 | 89200000 | 0.140477 | 0.023389456 |
| chr5 | 89350001 | 89450000 | 855  | 742 | 89400000 | 0.132133 | 0.030688969 |
| chr5 | 89400001 | 89500000 | 985  | 851 | 89450000 | 0.138593 | 0.024894965 |
| chr5 | 89650001 | 89750000 | 971  | 829 | 89700000 | 0.155727 | 0.013801928 |
| chr5 | 89700001 | 89800000 | 953  | 799 | 89750000 | 0.181909 | 0.005079241 |
| chr5 | 90200001 | 90300000 | 955  | 810 | 90250000 | 0.165207 | 0.009743823 |
| chr5 | 90250001 | 90350000 | 1020 | 852 | 90300000 | 0.187272 | 0.004078193 |
| chr5 | 90450001 | 90550000 | 1008 | 849 | 90500000 | 0.175287 | 0.006614438 |
| chr5 | 90600001 | 90700000 | 930  | 809 | 90650000 | 0.128719 | 0.034179005 |
| chr5 | 90800001 | 90900000 | 982  | 824 | 90850000 | 0.180707 | 0.005331707 |
| chr5 | 91000001 | 91100000 | 958  | 834 | 91050000 | 0.127607 | 0.035384881 |
| chr5 | 91050001 | 91150000 | 986  | 850 | 91100000 | 0.141753 | 0.02241399  |
| chr5 | 91250001 | 91350000 | 1068 | 904 | 91300000 | 0.168145 | 0.008719393 |
| chr5 | 91300001 | 91400000 | 1011 | 865 | 91350000 | 0.152639 | 0.015407727 |
| chr5 | 91350001 | 91450000 | 994  | 850 | 91400000 | 0.153411 | 0.014991885 |
| chr5 | 91400001 | 91500000 | 930  | 756 | 91450000 | 0.226473 | 0.000703792 |
| chr5 | 91450001 | 91550000 | 890  | 743 | 91500000 | 0.188071 | 0.003945237 |
| chr5 | 91650001 | 91750000 | 692  | 546 | 91700000 | 0.269499 | 7.52E-05    |
| chr5 | 91700001 | 91800000 | 1088 | 848 | 91750000 | 0.287171 | 2.74E-05    |
| chr5 | 91850001 | 91950000 | 1065 | 916 | 91900000 | 0.145062 | 0.020043698 |
| chr5 | 91900001 | 92000000 | 1112 | 861 | 91950000 | 0.2967   | 1.55E-05    |
| chr5 | 91950001 | 92050000 | 1134 | 896 | 9.20E+07 | 0.267478 | 8.41E-05    |
| chr5 | 92000001 | 92100000 | 1097 | 918 | 92050000 | 0.184626 | 0.004547576 |
| chr5 | 92050001 | 92150000 | 1056 | 914 | 92100000 | 0.135972 | 0.02712417  |
| chr5 | 92100001 | 92200000 | 1033 | 884 | 92150000 | 0.15235  | 0.015565914 |
| chr5 | 92800001 | 92900000 | 901  | 739 | 92850000 | 0.213581 | 0.001291899 |
| chr5 | 93200001 | 93300000 | 1043 | 871 | 93250000 | 0.187623 | 0.004019367 |

|      |          |          |      |      |           |          |             |
|------|----------|----------|------|------|-----------|----------|-------------|
| chr5 | 93250001 | 93350000 | 1006 | 877  | 93300000  | 0.12561  | 0.037636431 |
| chr5 | 93400001 | 93500000 | 917  | 800  | 93450000  | 0.12455  | 0.038878414 |
| chr5 | 93450001 | 93550000 | 980  | 840  | 93500000  | 0.150021 | 0.016892961 |
| chr5 | 93500001 | 93600000 | 1111 | 924  | 93550000  | 0.193522 | 0.003137736 |
| chr5 | 93650001 | 93750000 | 928  | 806  | 93700000  | 0.130973 | 0.031840208 |
| chr5 | 94050001 | 94150000 | 995  | 1026 | 94100000  | -0.11663 | 0.048909316 |
| chr5 | 94250001 | 94350000 | 1037 | 886  | 94300000  | 0.154666 | 0.014336942 |
| chr5 | 94300001 | 94400000 | 1085 | 945  | 94350000  | 0.126937 | 0.036127101 |
| chr5 | 95450001 | 95550000 | 1057 | 902  | 95500000  | 0.156404 | 0.013470009 |
| chr5 | 95500001 | 95600000 | 1029 | 895  | 95550000  | 0.128912 | 0.033974    |
| chr5 | 96500001 | 96600000 | 895  | 775  | 96550000  | 0.13532  | 0.027704356 |
| chr5 | 96700001 | 96800000 | 1052 | 907  | 96750000  | 0.141588 | 0.022537807 |
| chr5 | 96900001 | 97000000 | 1024 | 874  | 96950000  | 0.156139 | 0.013599378 |
| chr5 | 97150001 | 97250000 | 966  | 796  | 97200000  | 0.206883 | 0.001751095 |
| chr5 | 97200001 | 97300000 | 981  | 747  | 97250000  | 0.320773 | 3.46E-06    |
| chr5 | 97250001 | 97350000 | 989  | 808  | 97300000  | 0.219243 | 0.000992923 |
| chr5 | 97300001 | 97400000 | 945  | 803  | 97350000  | 0.162543 | 0.010762558 |
| chr5 | 97350001 | 97450000 | 947  | 801  | 97400000  | 0.16919  | 0.008378514 |
| chr5 | 97400001 | 97500000 | 902  | 777  | 97450000  | 0.142841 | 0.021609732 |
| chr5 | 97450001 | 97550000 | 925  | 762  | 97500000  | 0.207291 | 0.001719369 |
| chr5 | 97500001 | 97600000 | 948  | 740  | 97550000  | 0.28499  | 3.11E-05    |
| chr5 | 97550001 | 97650000 | 984  | 786  | 97600000  | 0.251757 | 0.000196618 |
| chr5 | 97800001 | 97900000 | 971  | 839  | 97850000  | 0.138429 | 0.025029878 |
| chr5 | 97850001 | 97950000 | 955  | 797  | 97900000  | 0.188549 | 0.00386762  |
| chr5 | 97950001 | 98050000 | 881  | 918  | 9.80E+07  | -0.13172 | 0.030793725 |
| chr5 | 98150001 | 98250000 | 986  | 849  | 98200000  | 0.143451 | 0.021169446 |
| chr5 | 98200001 | 98300000 | 1007 | 873  | 98250000  | 0.133638 | 0.029247524 |
| chr5 | 98800001 | 98900000 | 248  | 212  | 98850000  | 0.153904 | 0.014731522 |
| chr5 | 98950001 | 99050000 | 976  | 848  | 9.90E+07  | 0.130445 | 0.032375917 |
| chr5 | 99050001 | 99150000 | 904  | 790  | 99100000  | 0.122098 | 0.041880034 |
| chr5 | 99100001 | 99200000 | 968  | 756  | 99150000  | 0.284249 | 3.25E-05    |
| chr5 | 99150001 | 99250000 | 987  | 799  | 99200000  | 0.232483 | 0.000525015 |
| chr5 | 99400001 | 99500000 | 644  | 540  | 99450000  | 0.18173  | 0.005116236 |
| chr5 | 99600001 | 99700000 | 586  | 497  | 99650000  | 0.165283 | 0.009716053 |
| chr5 | 99650001 | 99750000 | 329  | 275  | 99700000  | 0.186284 | 0.004248063 |
| chr5 | 99700001 | 99800000 | 629  | 515  | 99750000  | 0.216116 | 0.001149095 |
| chr5 | 99750001 | 99850000 | 952  | 786  | 99800000  | 0.20406  | 0.001985864 |
| chr5 | 99900001 | 1E+08    | 973  | 836  | 99950000  | 0.146565 | 0.019039718 |
| chr5 | 99950001 | 1E+08    | 953  | 832  | 1.00E+08  | 0.123521 | 0.040116192 |
| chr5 | 1E+08    | 1E+08    | 908  | 795  | 100350000 | 0.119366 | 0.04544493  |
| chr5 | 1E+08    | 1.01E+08 | 920  | 757  | 100450000 | 0.208969 | 0.001594202 |
| chr5 | 1E+08    | 1.01E+08 | 887  | 715  | 100500000 | 0.238619 | 0.000386734 |
| chr5 | 1.01E+08 | 1.01E+08 | 1021 | 856  | 100650000 | 0.181928 | 0.005075245 |
| chr5 | 1.01E+08 | 1.01E+08 | 1050 | 902  | 100700000 | 0.146818 | 0.018874921 |
| chr5 | 1.01E+08 | 1.01E+08 | 982  | 848  | 100750000 | 0.139287 | 0.024331044 |
| chr5 | 1.01E+08 | 1.01E+08 | 923  | 791  | 100800000 | 0.150281 | 0.016739879 |
| chr5 | 1.01E+08 | 1.01E+08 | 876  | 765  | 100850000 | 0.123099 | 0.040632459 |

|      |          |          |      |     |           |          |             |
|------|----------|----------|------|-----|-----------|----------|-------------|
| chr5 | 1.01E+08 | 1.01E+08 | 985  | 838 | 101300000 | 0.160802 | 0.011477364 |
| chr5 | 1.01E+08 | 1.01E+08 | 969  | 824 | 101350000 | 0.161481 | 0.011193847 |
| chr5 | 1.01E+08 | 1.01E+08 | 999  | 859 | 101400000 | 0.145455 | 0.019777169 |
| chr5 | 1.02E+08 | 1.02E+08 | 924  | 790 | 101700000 | 0.153668 | 0.014855525 |
| chr5 | 1.02E+08 | 1.02E+08 | 957  | 837 | 101750000 | 0.12092  | 0.043388953 |
| chr5 | 1.02E+08 | 1.02E+08 | 1065 | 903 | 102250000 | 0.165684 | 0.009570756 |
| chr5 | 1.03E+08 | 1.04E+08 | 952  | 807 | 103450000 | 0.166021 | 0.009449915 |
| chr5 | 1.03E+08 | 1.04E+08 | 1046 | 904 | 103500000 | 0.138116 | 0.025288327 |
| chr5 | 1.04E+08 | 1.04E+08 | 1023 | 866 | 103600000 | 0.167995 | 0.008769219 |
| chr5 | 1.04E+08 | 1.04E+08 | 977  | 834 | 103650000 | 0.155939 | 0.013697219 |
| chr5 | 1.04E+08 | 1.04E+08 | 977  | 856 | 103700000 | 0.118376 | 0.046794906 |
| chr5 | 1.04E+08 | 1.04E+08 | 995  | 834 | 103850000 | 0.182277 | 0.005004026 |
| chr5 | 1.04E+08 | 1.04E+08 | 1046 | 863 | 103900000 | 0.205079 | 0.001898058 |
| chr5 | 1.04E+08 | 1.04E+08 | 1087 | 937 | 103950000 | 0.141859 | 0.022334402 |
| chr5 | 1.04E+08 | 1.04E+08 | 1048 | 904 | 1.04E+08  | 0.140872 | 0.023083466 |
| chr5 | 1.04E+08 | 1.04E+08 | 949  | 829 | 104050000 | 0.122664 | 0.04117101  |
| chr5 | 1.04E+08 | 1.04E+08 | 978  | 842 | 104150000 | 0.143642 | 0.02103312  |
| chr5 | 1.04E+08 | 1.04E+08 | 935  | 804 | 104200000 | 0.145399 | 0.019814785 |
| chr5 | 1.04E+08 | 1.04E+08 | 959  | 824 | 104350000 | 0.146515 | 0.019072667 |
| chr5 | 1.04E+08 | 1.05E+08 | 1030 | 866 | 104450000 | 0.177834 | 0.005981108 |
| chr5 | 1.05E+08 | 1.05E+08 | 1053 | 887 | 104600000 | 0.175128 | 0.006656089 |
| chr5 | 1.05E+08 | 1.05E+08 | 1067 | 908 | 104650000 | 0.160424 | 0.01163772  |
| chr5 | 1.05E+08 | 1.05E+08 | 998  | 803 | 1.05E+08  | 0.241268 | 0.000338239 |
| chr5 | 1.05E+08 | 1.05E+08 | 1032 | 850 | 105050000 | 0.207536 | 0.001700487 |
| chr5 | 1.05E+08 | 1.05E+08 | 1011 | 876 | 105200000 | 0.134408 | 0.028532001 |
| chr5 | 1.05E+08 | 1.05E+08 | 1050 | 898 | 105250000 | 0.15323  | 0.015088514 |
| chr5 | 1.05E+08 | 1.05E+08 | 989  | 834 | 105350000 | 0.173551 | 0.007079693 |
| chr5 | 1.05E+08 | 1.05E+08 | 1026 | 867 | 105400000 | 0.170555 | 0.007951157 |
| chr5 | 1.05E+08 | 1.06E+08 | 1015 | 862 | 105500000 | 0.163348 | 0.010445148 |
| chr5 | 1.06E+08 | 1.06E+08 | 994  | 848 | 105550000 | 0.15681  | 0.013274462 |
| chr5 | 1.06E+08 | 1.06E+08 | 1048 | 847 | 105700000 | 0.234833 | 0.000467368 |
| chr5 | 1.06E+08 | 1.06E+08 | 1014 | 834 | 105750000 | 0.209567 | 0.001551667 |
| chr5 | 1.06E+08 | 1.06E+08 | 994  | 827 | 105950000 | 0.192987 | 0.00320987  |
| chr5 | 1.06E+08 | 1.06E+08 | 931  | 749 | 1.06E+08  | 0.241444 | 0.000335233 |
| chr5 | 1.06E+08 | 1.06E+08 | 921  | 773 | 106050000 | 0.180361 | 0.005406413 |
| chr5 | 1.06E+08 | 1.06E+08 | 866  | 751 | 106100000 | 0.133182 | 0.029678223 |
| chr5 | 1.06E+08 | 1.06E+08 | 919  | 770 | 106150000 | 0.182835 | 0.00489215  |
| chr5 | 1.07E+08 | 1.07E+08 | 1087 | 923 | 106700000 | 0.163578 | 0.010356262 |
| chr5 | 1.07E+08 | 1.07E+08 | 1095 | 942 | 107100000 | 0.14476  | 0.020250801 |
| chr5 | 1.07E+08 | 1.07E+08 | 1041 | 904 | 107300000 | 0.131204 | 0.03160877  |
| chr5 | 1.07E+08 | 1.07E+08 | 1025 | 884 | 107350000 | 0.141134 | 0.022882883 |
| chr5 | 1.07E+08 | 1.07E+08 | 1001 | 870 | 107400000 | 0.129983 | 0.032850912 |
| chr5 | 1.08E+08 | 1.08E+08 | 808  | 837 | 107750000 | -0.12324 | 0.0401309   |
| chr5 | 1.08E+08 | 1.08E+08 | 985  | 860 | 107850000 | 0.123415 | 0.040245036 |
| chr5 | 1.08E+08 | 1.08E+08 | 968  | 832 | 108200000 | 0.146052 | 0.019377702 |
| chr5 | 1.08E+08 | 1.08E+08 | 1001 | 831 | 108250000 | 0.19615  | 0.002804595 |
| chr5 | 1.08E+08 | 1.08E+08 | 936  | 799 | 108300000 | 0.155941 | 0.013696309 |

|      |          |          |      |      |           |          |             |
|------|----------|----------|------|------|-----------|----------|-------------|
| chr5 | 1.08E+08 | 1.08E+08 | 964  | 802  | 108350000 | 0.193059 | 0.003200033 |
| chr5 | 1.08E+08 | 1.08E+08 | 1090 | 876  | 108400000 | 0.242954 | 0.000310401 |
| chr5 | 1.08E+08 | 1.09E+08 | 1072 | 895  | 108450000 | 0.187974 | 0.003961294 |
| chr5 | 1.09E+08 | 1.09E+08 | 934  | 979  | 108900000 | -0.14026 | 0.023292931 |
| chr5 | 1.09E+08 | 1.09E+08 | 892  | 934  | 108950000 | -0.13875 | 0.024492952 |
| chr5 | 1.09E+08 | 1.09E+08 | 1046 | 900  | 109050000 | 0.144514 | 0.020420803 |
| chr5 | 1.09E+08 | 1.09E+08 | 1071 | 898  | 109100000 | 0.181799 | 0.005101806 |
| chr5 | 1.1E+08  | 1.1E+08  | 1003 | 850  | 109850000 | 0.166415 | 0.009310497 |
| chr5 | 1.1E+08  | 1.1E+08  | 1026 | 828  | 109900000 | 0.236956 | 0.000420405 |
| chr5 | 1.1E+08  | 1.1E+08  | 1077 | 872  | 109950000 | 0.232246 | 0.000531164 |
| chr5 | 1.1E+08  | 1.1E+08  | 957  | 812  | 1.10E+08  | 0.164667 | 0.009943035 |
| chr5 | 1.11E+08 | 1.11E+08 | 1060 | 898  | 110700000 | 0.166905 | 0.009139595 |
| chr5 | 1.11E+08 | 1.11E+08 | 1078 | 879  | 110750000 | 0.22205  | 0.000869662 |
| chr5 | 1.11E+08 | 1.11E+08 | 1026 | 881  | 110800000 | 0.147445 | 0.018472066 |
| chr5 | 1.11E+08 | 1.11E+08 | 1117 | 979  | 111150000 | 0.117877 | 0.047488199 |
| chr5 | 1.11E+08 | 1.11E+08 | 933  | 816  | 111350000 | 0.120936 | 0.043367367 |
| chr5 | 1.11E+08 | 1.11E+08 | 981  | 832  | 111400000 | 0.165298 | 0.009710655 |
| chr5 | 1.11E+08 | 1.12E+08 | 1025 | 889  | 111450000 | 0.132997 | 0.029854963 |
| chr5 | 1.12E+08 | 1.13E+08 | 963  | 1033 | 112450000 | -0.1736  | 0.006921387 |
| chr5 | 1.13E+08 | 1.13E+08 | 986  | 825  | 112850000 | 0.184822 | 0.004511209 |
| chr5 | 1.13E+08 | 1.13E+08 | 838  | 916  | 1.13E+08  | -0.20077 | 0.002225883 |
| chr5 | 1.13E+08 | 1.13E+08 | 1002 | 829  | 113150000 | 0.201067 | 0.002265919 |
| chr5 | 1.14E+08 | 1.14E+08 | 963  | 839  | 113600000 | 0.126493 | 0.036626173 |
| chr5 | 1.16E+08 | 1.16E+08 | 1066 | 904  | 115650000 | 0.165441 | 0.009658555 |
| chr5 | 1.16E+08 | 1.16E+08 | 1023 | 874  | 116400000 | 0.154729 | 0.014304366 |
| chr5 | 1.17E+08 | 1.17E+08 | 1019 | 890  | 116800000 | 0.122905 | 0.040872237 |
| chr5 | 1.17E+08 | 1.17E+08 | 939  | 761  | 116850000 | 0.230857 | 0.000568685 |
| chr5 | 1.17E+08 | 1.17E+08 | 926  | 761  | 116900000 | 0.210744 | 0.001470917 |
| chr5 | 1.18E+08 | 1.18E+08 | 1092 | 939  | 118150000 | 0.145404 | 0.019811452 |
| chr5 | 1.18E+08 | 1.18E+08 | 1051 | 886  | 118200000 | 0.174012 | 0.006953422 |
| chr5 | 1.18E+08 | 1.19E+08 | 988  | 865  | 118500000 | 0.119439 | 0.045345976 |
| chr5 | 1.19E+08 | 1.19E+08 | 1015 | 871  | 119100000 | 0.148363 | 0.017895159 |
| chr5 | 1.19E+08 | 1.19E+08 | 1100 | 960  | 119250000 | 0.124025 | 0.03950537  |
| chr5 | 1.19E+08 | 1.2E+08  | 941  | 825  | 119450000 | 0.117429 | 0.048116954 |
| chr5 | 1.19E+08 | 1.2E+08  | 868  | 757  | 119500000 | 0.12503  | 0.038311813 |
| chr5 | 1.2E+08  | 1.2E+08  | 991  | 815  | 119700000 | 0.209713 | 0.001541394 |
| chr5 | 1.2E+08  | 1.2E+08  | 910  | 797  | 119750000 | 0.118915 | 0.04605565  |
| chr5 | 1.2E+08  | 1.2E+08  | 1030 | 857  | 119900000 | 0.192905 | 0.00322095  |
| chr5 | 1.2E+08  | 1.21E+08 | 1056 | 925  | 120500000 | 0.118713 | 0.046331912 |
| chr5 | 1.21E+08 | 1.21E+08 | 986  | 859  | 120550000 | 0.126558 | 0.036553262 |
| chr5 | 1.21E+08 | 1.21E+08 | 959  | 827  | 120600000 | 0.141272 | 0.022777778 |
| chr5 | 1.21E+08 | 1.21E+08 | 1007 | 867  | 120650000 | 0.143588 | 0.021071877 |
| chr5 | 1.21E+08 | 1.21E+08 | 1013 | 852  | 120750000 | 0.177337 | 0.00610021  |
| chr5 | 1.21E+08 | 1.21E+08 | 1066 | 841  | 120800000 | 0.269658 | 7.46E-05    |
| chr5 | 1.21E+08 | 1.21E+08 | 979  | 820  | 120850000 | 0.183313 | 0.004797872 |
| chr5 | 1.21E+08 | 1.21E+08 | 948  | 805  | 120900000 | 0.163527 | 0.010376006 |
| chr5 | 1.21E+08 | 1.21E+08 | 935  | 779  | 120950000 | 0.190971 | 0.003494961 |

|      |          |          |      |      |           |          |             |
|------|----------|----------|------|------|-----------|----------|-------------|
| chr5 | 1.21E+08 | 1.21E+08 | 891  | 751  | 1.21E+08  | 0.174241 | 0.006891578 |
| chr5 | 1.21E+08 | 1.21E+08 | 1063 | 895  | 121200000 | 0.17581  | 0.006479739 |
| chr5 | 1.21E+08 | 1.21E+08 | 1302 | 1138 | 121350000 | 0.121857 | 0.042185293 |
| chr5 | 1.21E+08 | 1.22E+08 | 1027 | 1097 | 121450000 | -0.1675  | 0.00877145  |
| chr5 | 1.22E+08 | 1.22E+08 | 929  | 806  | 121550000 | 0.132527 | 0.03030645  |
| chr5 | 1.22E+08 | 1.22E+08 | 953  | 1001 | 121650000 | -0.14327 | 0.021046556 |
| chr5 | 1.22E+08 | 1.22E+08 | 1035 | 905  | 121900000 | 0.121269 | 0.042936711 |
| chr5 | 1.22E+08 | 1.22E+08 | 921  | 808  | 122200000 | 0.116474 | 0.049479774 |
| chr5 | 1.23E+08 | 1.23E+08 | 953  | 823  | 122650000 | 0.139212 | 0.024391429 |
| chr5 | 1.23E+08 | 1.23E+08 | 932  | 808  | 122700000 | 0.133603 | 0.029280831 |
| chr5 | 1.23E+08 | 1.23E+08 | 990  | 862  | 123050000 | 0.127369 | 0.035646871 |
| chr5 | 1.23E+08 | 1.23E+08 | 985  | 845  | 123300000 | 0.148801 | 0.01762591  |
| chr5 | 1.23E+08 | 1.23E+08 | 1067 | 881  | 123350000 | 0.203974 | 0.001993448 |
| chr5 | 1.25E+08 | 1.25E+08 | 944  | 786  | 124950000 | 0.191886 | 0.003362889 |
| chr5 | 1.25E+08 | 1.25E+08 | 995  | 857  | 1.25E+08  | 0.14303  | 0.021472922 |
| chr5 | 1.25E+08 | 1.26E+08 | 896  | 933  | 125500000 | -0.13075 | 0.031764765 |
| chr5 | 1.26E+08 | 1.26E+08 | 896  | 759  | 125900000 | 0.167027 | 0.009097503 |
| chr5 | 1.26E+08 | 1.26E+08 | 766  | 631  | 126050000 | 0.207333 | 0.001716128 |
| chr5 | 1.26E+08 | 1.26E+08 | 835  | 705  | 126100000 | 0.171781 | 0.007583713 |
| chr5 | 1.27E+08 | 1.27E+08 | 1047 | 1085 | 126700000 | -0.12381 | 0.039448745 |
| chr5 | 1.28E+08 | 1.28E+08 | 979  | 849  | 128200000 | 0.133173 | 0.029687547 |
| chr5 | 1.28E+08 | 1.28E+08 | 871  | 740  | 128250000 | 0.162776 | 0.010669859 |
| chr5 | 1.28E+08 | 1.29E+08 | 945  | 810  | 128500000 | 0.150021 | 0.016892961 |
| chr5 | 1.29E+08 | 1.29E+08 | 1013 | 888  | 128700000 | 0.117631 | 0.04783253  |
| chr5 | 1.29E+08 | 1.29E+08 | 1086 | 931  | 128800000 | 0.149799 | 0.017023987 |
| chr5 | 1.29E+08 | 1.29E+08 | 871  | 918  | 129250000 | -0.14819 | 0.017763617 |
| chr5 | 1.29E+08 | 1.29E+08 | 996  | 866  | 129400000 | 0.129407 | 0.033450841 |
| chr5 | 1.29E+08 | 1.3E+08  | 990  | 860  | 129450000 | 0.13072  | 0.03209604  |
| chr5 | 1.3E+08  | 1.3E+08  | 1008 | 868  | 129550000 | 0.143357 | 0.021237053 |
| chr5 | 1.3E+08  | 1.3E+08  | 937  | 774  | 129600000 | 0.203344 | 0.002049883 |
| chr5 | 1.3E+08  | 1.3E+08  | 969  | 798  | 129650000 | 0.207736 | 0.00168529  |
| chr5 | 1.3E+08  | 1.3E+08  | 998  | 826  | 129700000 | 0.200526 | 0.002320147 |
| chr5 | 1.3E+08  | 1.3E+08  | 902  | 785  | 1.30E+08  | 0.128063 | 0.034885994 |
| chr5 | 1.31E+08 | 1.31E+08 | 993  | 857  | 130750000 | 0.140127 | 0.023663277 |
| chr5 | 1.31E+08 | 1.31E+08 | 1070 | 1128 | 131350000 | -0.14853 | 0.017557375 |
| chr5 | 1.31E+08 | 1.31E+08 | 1051 | 1096 | 131400000 | -0.13286 | 0.029695057 |
| chr5 | 1.32E+08 | 1.32E+08 | 973  | 1021 | 131650000 | -0.14184 | 0.022085188 |
| chr5 | 1.32E+08 | 1.32E+08 | 857  | 957  | 131700000 | -0.2316  | 0.000523703 |
| chr5 | 1.32E+08 | 1.32E+08 | 952  | 1054 | 131750000 | -0.21921 | 0.000955804 |
| chr5 | 1.32E+08 | 1.32E+08 | 1072 | 1107 | 131800000 | -0.11872 | 0.045983914 |
| chr5 | 1.32E+08 | 1.32E+08 | 990  | 1021 | 132150000 | -0.11685 | 0.048594035 |
| chr5 | 1.32E+08 | 1.32E+08 | 761  | 654  | 132300000 | 0.146234 | 0.019257096 |
| chr5 | 1.32E+08 | 1.32E+08 | 755  | 625  | 132350000 | 0.200249 | 0.002348454 |
| chr5 | 1.33E+08 | 1.33E+08 | 936  | 992  | 132550000 | -0.1562  | 0.01336132  |
| chr5 | 1.33E+08 | 1.33E+08 | 1083 | 1185 | 132600000 | -0.20223 | 0.002086753 |
| chr5 | 1.33E+08 | 1.33E+08 | 1104 | 1152 | 132750000 | -0.13377 | 0.028831366 |
| chr5 | 1.33E+08 | 1.33E+08 | 1018 | 1068 | 132850000 | -0.14155 | 0.02230745  |

|      |          |          |      |      |           |          |             |
|------|----------|----------|------|------|-----------|----------|-------------|
| chr5 | 1.33E+08 | 1.33E+08 | 931  | 981  | 133300000 | -0.14784 | 0.017981076 |
| chr5 | 1.33E+08 | 1.33E+08 | 869  | 898  | 133350000 | -0.11973 | 0.044621703 |
| chr5 | 1.33E+08 | 1.34E+08 | 1034 | 1093 | 133450000 | -0.15243 | 0.015301709 |
| chr5 | 1.33E+08 | 1.34E+08 | 975  | 1008 | 133500000 | -0.12039 | 0.04374543  |
| chr5 | 1.34E+08 | 1.34E+08 | 928  | 776  | 133750000 | 0.185696 | 0.00435213  |
| chr5 | 1.34E+08 | 1.34E+08 | 763  | 637  | 1.34E+08  | 0.188018 | 0.003954003 |
| chr5 | 1.34E+08 | 1.34E+08 | 795  | 666  | 134050000 | 0.183061 | 0.004847367 |
| chr5 | 1.34E+08 | 1.34E+08 | 845  | 699  | 134100000 | 0.201287 | 0.00224414  |
| chr5 | 1.34E+08 | 1.34E+08 | 1100 | 1189 | 134400000 | -0.18462 | 0.004439576 |
| chr5 | 1.34E+08 | 1.35E+08 | 1079 | 1127 | 134450000 | -0.13516 | 0.027558112 |
| chr5 | 1.34E+08 | 1.35E+08 | 1122 | 1159 | 134500000 | -0.11918 | 0.045362038 |
| chr5 | 1.35E+08 | 1.35E+08 | 1121 | 1197 | 134550000 | -0.16701 | 0.008937407 |
| chr5 | 1.35E+08 | 1.35E+08 | 1059 | 1145 | 134600000 | -0.18502 | 0.004366802 |
| chr5 | 1.35E+08 | 1.35E+08 | 1063 | 1183 | 134650000 | -0.22668 | 0.000667155 |
| chr5 | 1.35E+08 | 1.35E+08 | 1125 | 1185 | 134700000 | -0.14733 | 0.018302455 |
| chr5 | 1.35E+08 | 1.35E+08 | 1024 | 1076 | 134800000 | -0.14383 | 0.020643263 |
| chr5 | 1.35E+08 | 1.35E+08 | 1006 | 1129 | 134850000 | -0.23879 | 0.000364651 |
| chr5 | 1.35E+08 | 1.35E+08 | 1122 | 1179 | 134900000 | -0.14386 | 0.020623093 |
| chr5 | 1.35E+08 | 1.35E+08 | 936  | 1019 | 135100000 | -0.19495 | 0.002870397 |
| chr5 | 1.35E+08 | 1.35E+08 | 1075 | 1158 | 135150000 | -0.17967 | 0.005434072 |
| chr5 | 1.35E+08 | 1.35E+08 | 1123 | 1174 | 135400000 | -0.13645 | 0.026427604 |
| chr5 | 1.35E+08 | 1.36E+08 | 1047 | 1099 | 135450000 | -0.1423  | 0.021745614 |
| chr5 | 1.35E+08 | 1.36E+08 | 1026 | 1124 | 135500000 | -0.20398 | 0.001929421 |
| chr5 | 1.36E+08 | 1.36E+08 | 1079 | 1144 | 135550000 | -0.15676 | 0.013092103 |
| chr5 | 1.36E+08 | 1.36E+08 | 868  | 912  | 136100000 | -0.14371 | 0.020730367 |
| chr5 | 1.36E+08 | 1.36E+08 | 905  | 791  | 136250000 | 0.121868 | 0.042171072 |
| chr5 | 1.37E+08 | 1.37E+08 | 1103 | 1162 | 136550000 | -0.14755 | 0.018166216 |
| chr5 | 1.37E+08 | 1.37E+08 | 1042 | 895  | 137150000 | 0.147024 | 0.018741898 |
| chr5 | 1.37E+08 | 1.37E+08 | 1021 | 891  | 137200000 | 0.124114 | 0.039399232 |
| chr5 | 1.38E+08 | 1.38E+08 | 888  | 778  | 137600000 | 0.118418 | 0.046737303 |
| chr5 | 1.38E+08 | 1.38E+08 | 835  | 898  | 137700000 | -0.17731 | 0.005974872 |
| chr5 | 1.38E+08 | 1.38E+08 | 964  | 838  | 1.38E+08  | 0.129711 | 0.033132874 |
| chr5 | 1.38E+08 | 1.39E+08 | 1057 | 912  | 138450000 | 0.140498 | 0.02337312  |
| chr5 | 1.39E+08 | 1.39E+08 | 850  | 897  | 138600000 | -0.15002 | 0.016664937 |
| chr5 | 1.39E+08 | 1.39E+08 | 680  | 715  | 138900000 | -0.14478 | 0.019986634 |
| chr5 | 1.39E+08 | 1.39E+08 | 668  | 705  | 138950000 | -0.15015 | 0.016588888 |
| chr5 | 1.39E+08 | 1.39E+08 | 855  | 938  | 1.39E+08  | -0.20604 | 0.001759426 |
| chr5 | 1.39E+08 | 1.39E+08 | 972  | 1165 | 139050000 | -0.33367 | 1.31E-06    |
| chr5 | 1.39E+08 | 1.39E+08 | 994  | 1086 | 139100000 | -0.20008 | 0.002294795 |
| chr5 | 1.39E+08 | 1.39E+08 | 1057 | 1101 | 139150000 | -0.13121 | 0.031302205 |
| chr5 | 1.39E+08 | 1.39E+08 | 1106 | 1216 | 139200000 | -0.20916 | 0.001526446 |
| chr5 | 1.39E+08 | 1.39E+08 | 1161 | 1260 | 139250000 | -0.19043 | 0.003481818 |
| chr5 | 1.4E+08  | 1.4E+08  | 881  | 763  | 139850000 | 0.135087 | 0.027913535 |
| chr5 | 1.4E+08  | 1.4E+08  | 1043 | 893  | 140400000 | 0.151635 | 0.015963271 |
| chr5 | 1.41E+08 | 1.41E+08 | 1079 | 905  | 140950000 | 0.181333 | 0.005198761 |
| chr5 | 1.41E+08 | 1.41E+08 | 1091 | 1146 | 141200000 | -0.14333 | 0.021002189 |
| chr5 | 1.41E+08 | 1.41E+08 | 989  | 1060 | 141250000 | -0.17239 | 0.007258105 |



|      |          |          |      |      |           |          |             |
|------|----------|----------|------|------|-----------|----------|-------------|
| chr5 | 1.41E+08 | 1.41E+08 | 999  | 1045 | 141300000 | -0.13732 | 0.025681061 |
| chr5 | 1.41E+08 | 1.41E+08 | 987  | 1031 | 141350000 | -0.13529 | 0.027441923 |
| chr5 | 1.41E+08 | 1.41E+08 | 853  | 906  | 141400000 | -0.15934 | 0.011915848 |
| chr5 | 1.42E+08 | 1.42E+08 | 1017 | 876  | 141750000 | 0.142945 | 0.021534104 |
| chr5 | 1.43E+08 | 1.43E+08 | 1074 | 919  | 143250000 | 0.152485 | 0.015491706 |
| chr5 | 1.43E+08 | 1.43E+08 | 1001 | 867  | 143400000 | 0.134966 | 0.028022859 |
| chr5 | 1.44E+08 | 1.44E+08 | 927  | 811  | 144050000 | 0.120496 | 0.04394218  |
| chr5 | 1.44E+08 | 1.44E+08 | 993  | 829  | 144350000 | 0.18805  | 0.003948763 |
| chr5 | 1.45E+08 | 1.45E+08 | 984  | 852  | 144600000 | 0.135433 | 0.027602667 |
| chr5 | 1.45E+08 | 1.45E+08 | 990  | 863  | 144650000 | 0.125696 | 0.03753662  |
| chr5 | 1.45E+08 | 1.45E+08 | 990  | 866  | 144950000 | 0.12069  | 0.043688175 |
| chr5 | 1.45E+08 | 1.45E+08 | 905  | 791  | 1.45E+08  | 0.121868 | 0.042171072 |
| chr5 | 1.45E+08 | 1.45E+08 | 867  | 902  | 145300000 | -0.12947 | 0.033082633 |
| chr5 | 1.46E+08 | 1.46E+08 | 1034 | 884  | 145850000 | 0.153746 | 0.014814534 |
| chr5 | 1.46E+08 | 1.46E+08 | 939  | 977  | 146400000 | -0.12961 | 0.032938776 |
| chr5 | 1.47E+08 | 1.47E+08 | 962  | 832  | 147050000 | 0.137082 | 0.026160758 |
| chr5 | 1.47E+08 | 1.47E+08 | 1000 | 847  | 147400000 | 0.167194 | 0.009040034 |
| chr5 | 1.47E+08 | 1.48E+08 | 981  | 838  | 147450000 | 0.154931 | 0.014201471 |
| chr5 | 1.48E+08 | 1.48E+08 | 988  | 800  | 147600000 | 0.232139 | 0.000533974 |
| chr5 | 1.48E+08 | 1.48E+08 | 933  | 781  | 147650000 | 0.184183 | 0.004630704 |
| chr5 | 1.49E+08 | 1.49E+08 | 1113 | 1185 | 148650000 | -0.16281 | 0.010476464 |
| chr5 | 1.49E+08 | 1.49E+08 | 1067 | 1147 | 148800000 | -0.17668 | 0.006128129 |
| chr5 | 1.49E+08 | 1.49E+08 | 1061 | 917  | 1.49E+08  | 0.138059 | 0.025335868 |
| chr5 | 1.49E+08 | 1.5E+08  | 1079 | 1125 | 149450000 | -0.1326  | 0.029939438 |
| chr5 | 1.49E+08 | 1.5E+08  | 1100 | 1210 | 149500000 | -0.20988 | 0.001477547 |
| chr5 | 1.5E+08  | 1.5E+08  | 1168 | 1273 | 149550000 | -0.19656 | 0.002676163 |
| chr5 | 1.5E+08  | 1.5E+08  | 1134 | 1180 | 149600000 | -0.12974 | 0.032800778 |
| chr5 | 1.5E+08  | 1.5E+08  | 950  | 1020 | 149850000 | -0.17494 | 0.006565631 |
| chr5 | 1.5E+08  | 1.5E+08  | 1017 | 1086 | 149900000 | -0.16708 | 0.008914388 |
| chr5 | 1.5E+08  | 1.5E+08  | 1079 | 1142 | 149950000 | -0.15424 | 0.014342547 |
| chr5 | 1.5E+08  | 1.5E+08  | 1137 | 1194 | 1.50E+08  | -0.14294 | 0.021278849 |
| chr5 | 1.5E+08  | 1.5E+08  | 1033 | 1079 | 150050000 | -0.13523 | 0.027502552 |
| chr5 | 1.51E+08 | 1.51E+08 | 929  | 958  | 150600000 | -0.11672 | 0.048787729 |
| chr5 | 1.51E+08 | 1.51E+08 | 970  | 1071 | 150850000 | -0.21527 | 0.001150812 |
| chr5 | 1.51E+08 | 1.51E+08 | 1090 | 1149 | 150900000 | -0.14842 | 0.017622202 |
| chr5 | 1.51E+08 | 1.51E+08 | 886  | 939  | 151100000 | -0.15619 | 0.013367684 |
| chr5 | 1.51E+08 | 1.51E+08 | 906  | 782  | 151400000 | 0.139971 | 0.0237862   |
| chr5 | 1.52E+08 | 1.52E+08 | 857  | 723  | 152100000 | 0.172928 | 0.007253753 |
| chr5 | 1.52E+08 | 1.52E+08 | 816  | 703  | 152150000 | 0.142673 | 0.021732567 |
| chr5 | 1.52E+08 | 1.52E+08 | 1054 | 920  | 152350000 | 0.123797 | 0.039780595 |
| chr5 | 1.53E+08 | 1.53E+08 | 841  | 879  | 152750000 | -0.13613 | 0.026703603 |
| chr5 | 1.53E+08 | 1.53E+08 | 940  | 976  | 152800000 | -0.12659 | 0.036200432 |
| chr5 | 1.53E+08 | 1.53E+08 | 933  | 970  | 153300000 | -0.12848 | 0.034127814 |
| chr5 | 1.53E+08 | 1.54E+08 | 978  | 1035 | 153450000 | -0.1541  | 0.014416568 |
| chr5 | 1.54E+08 | 1.54E+08 | 874  | 907  | 154400000 | -0.12584 | 0.037053554 |
| chr5 | 1.54E+08 | 1.55E+08 | 921  | 957  | 154450000 | -0.12769 | 0.034983069 |
| chr5 | 1.54E+08 | 1.55E+08 | 884  | 937  | 154500000 | -0.15637 | 0.013278655 |

|      |          |          |      |      |           |          |             |
|------|----------|----------|------|------|-----------|----------|-------------|
| chr5 | 1.55E+08 | 1.55E+08 | 889  | 924  | 154600000 | -0.12808 | 0.03455682  |
| chr5 | 1.55E+08 | 1.55E+08 | 975  | 1061 | 154650000 | -0.19432 | 0.002948508 |
| chr5 | 1.55E+08 | 1.55E+08 | 964  | 1038 | 154700000 | -0.17907 | 0.00556667  |
| chr5 | 1.55E+08 | 1.55E+08 | 946  | 976  | 154750000 | -0.11741 | 0.047801411 |
| chr5 | 1.55E+08 | 1.55E+08 | 1136 | 959  | 155400000 | 0.171988 | 0.007523131 |
| chr5 | 1.56E+08 | 1.56E+08 | 893  | 922  | 1.56E+08  | -0.11848 | 0.046317967 |
| chr5 | 1.56E+08 | 1.56E+08 | 1095 | 957  | 156150000 | 0.121968 | 0.042044417 |
| chr5 | 1.57E+08 | 1.57E+08 | 888  | 944  | 156850000 | -0.1606  | 0.011373372 |
| chr5 | 1.57E+08 | 1.57E+08 | 824  | 851  | 157150000 | -0.11889 | 0.045759591 |
| chr5 | 1.57E+08 | 1.58E+08 | 1033 | 893  | 157450000 | 0.137736 | 0.025605814 |
| chr5 | 1.57E+08 | 1.58E+08 | 1101 | 933  | 157500000 | 0.166494 | 0.009282891 |
| chr5 | 1.58E+08 | 1.58E+08 | 1095 | 950  | 157800000 | 0.13256  | 0.03027485  |
| chr5 | 1.59E+08 | 1.59E+08 | 975  | 827  | 158600000 | 0.165143 | 0.009767241 |
| chr5 | 1.59E+08 | 1.59E+08 | 1041 | 901  | 158650000 | 0.135999 | 0.027100121 |
| chr5 | 1.59E+08 | 1.59E+08 | 1065 | 925  | 1.59E+08  | 0.130956 | 0.031857143 |
| chr5 | 1.59E+08 | 1.59E+08 | 1010 | 1058 | 159400000 | -0.13936 | 0.024004839 |
| chr5 | 1.6E+08  | 1.6E+08  | 932  | 961  | 159750000 | -0.11658 | 0.048989527 |
| chr5 | 1.6E+08  | 1.6E+08  | 977  | 1012 | 159800000 | -0.12315 | 0.040245475 |
| chr5 | 1.61E+08 | 1.61E+08 | 1017 | 868  | 160550000 | 0.156181 | 0.013578744 |
| chr5 | 1.61E+08 | 1.61E+08 | 1060 | 910  | 160600000 | 0.147754 | 0.018276187 |
| chr5 | 1.61E+08 | 1.61E+08 | 1111 | 974  | 160850000 | 0.117493 | 0.048025933 |
| chr5 | 1.61E+08 | 1.61E+08 | 983  | 862  | 161400000 | 0.117132 | 0.048537711 |
| chr5 | 1.61E+08 | 1.62E+08 | 920  | 801  | 161500000 | 0.12746  | 0.03554639  |
| chr5 | 1.62E+08 | 1.62E+08 | 1011 | 877  | 161850000 | 0.132762 | 0.030079446 |
| chr5 | 1.62E+08 | 1.62E+08 | 956  | 827  | 161950000 | 0.136752 | 0.0264443   |
| chr5 | 1.62E+08 | 1.62E+08 | 884  | 775  | 1.62E+08  | 0.117478 | 0.048047189 |
| chr5 | 1.62E+08 | 1.62E+08 | 990  | 864  | 162350000 | 0.124025 | 0.03950537  |
| chr5 | 1.62E+08 | 1.62E+08 | 1007 | 859  | 162400000 | 0.156962 | 0.013201779 |
| chr5 | 1.63E+08 | 1.63E+08 | 1098 | 928  | 163150000 | 0.17031  | 0.008026586 |
| chr5 | 1.63E+08 | 1.63E+08 | 970  | 848  | 163200000 | 0.121549 | 0.042578193 |
| chr5 | 1.64E+08 | 1.64E+08 | 1039 | 884  | 163600000 | 0.160706 | 0.011518001 |
| chr5 | 1.64E+08 | 1.64E+08 | 1069 | 893  | 163650000 | 0.187158 | 0.004097487 |
| chr5 | 1.64E+08 | 1.64E+08 | 1041 | 902  | 163700000 | 0.134399 | 0.028540731 |
| chr5 | 1.64E+08 | 1.64E+08 | 1020 | 895  | 163850000 | 0.116238 | 0.049821803 |
| chr5 | 1.64E+08 | 1.64E+08 | 988  | 852  | 164250000 | 0.141286 | 0.022767031 |
| chr5 | 1.64E+08 | 1.64E+08 | 1020 | 863  | 164300000 | 0.168765 | 0.008515839 |
| chr5 | 1.64E+08 | 1.64E+08 | 899  | 784  | 164350000 | 0.125096 | 0.038234767 |
| chr5 | 1.64E+08 | 1.64E+08 | 940  | 791  | 164400000 | 0.176611 | 0.006278082 |
| chr5 | 1.64E+08 | 1.65E+08 | 970  | 819  | 164450000 | 0.17175  | 0.007593005 |
| chr5 | 1.65E+08 | 1.65E+08 | 1079 | 911  | 164650000 | 0.1718   | 0.007578149 |
| chr5 | 1.65E+08 | 1.65E+08 | 1075 | 933  | 164700000 | 0.132016 | 0.030804017 |
| chr5 | 1.65E+08 | 1.66E+08 | 995  | 865  | 165500000 | 0.129625 | 0.033223048 |
| chr5 | 1.66E+08 | 1.66E+08 | 961  | 790  | 165900000 | 0.210312 | 0.001500085 |
| chr5 | 1.66E+08 | 1.66E+08 | 961  | 831  | 166250000 | 0.137316 | 0.025960797 |
| chr5 | 1.66E+08 | 1.66E+08 | 996  | 830  | 166300000 | 0.190663 | 0.003540577 |
| chr5 | 1.66E+08 | 1.66E+08 | 925  | 794  | 166350000 | 0.147943 | 0.018157544 |
| chr5 | 1.66E+08 | 1.67E+08 | 981  | 1015 | 166500000 | -0.12153 | 0.042278356 |

|      |          |          |      |      |           |          |             |
|------|----------|----------|------|------|-----------|----------|-------------|
| chr5 | 1.67E+08 | 1.67E+08 | 953  | 998  | 166550000 | -0.13894 | 0.024343131 |
| chr5 | 1.67E+08 | 1.67E+08 | 1089 | 942  | 167100000 | 0.136833 | 0.026373879 |
| chr5 | 1.68E+08 | 1.68E+08 | 1002 | 1049 | 167850000 | -0.1385  | 0.024694183 |
| chr5 | 1.68E+08 | 1.68E+08 | 1009 | 1096 | 168200000 | -0.19169 | 0.003299648 |
| chr5 | 1.68E+08 | 1.68E+08 | 1051 | 1105 | 168250000 | -0.14466 | 0.020072213 |
| chr5 | 1.69E+08 | 1.69E+08 | 990  | 1043 | 169250000 | -0.14761 | 0.018127476 |
| chr5 | 1.69E+08 | 1.69E+08 | 992  | 1039 | 169300000 | -0.13916 | 0.02416572  |
| chr5 | 1.69E+08 | 1.69E+08 | 1035 | 1090 | 169350000 | -0.14707 | 0.018471205 |
| chr5 | 1.69E+08 | 1.69E+08 | 1007 | 1128 | 169400000 | -0.23608 | 0.000418436 |
| chr5 | 1.69E+08 | 1.7E+08  | 1060 | 1117 | 169450000 | -0.14794 | 0.017923015 |
| chr5 | 1.7E+08  | 1.7E+08  | 1055 | 1105 | 169750000 | -0.13918 | 0.024149855 |
| chr5 | 1.7E+08  | 1.7E+08  | 1086 | 1129 | 169800000 | -0.12839 | 0.03422039  |
| chr5 | 1.7E+08  | 1.7E+08  | 1053 | 1093 | 169850000 | -0.12616 | 0.036689591 |
| chr5 | 1.7E+08  | 1.7E+08  | 1039 | 1128 | 169900000 | -0.19094 | 0.003406544 |
| chr5 | 1.7E+08  | 1.7E+08  | 1113 | 1160 | 169950000 | -0.13204 | 0.030480954 |
| chr5 | 1.7E+08  | 1.7E+08  | 1096 | 1173 | 170050000 | -0.17033 | 0.007866409 |
| chr5 | 1.7E+08  | 1.7E+08  | 1027 | 1137 | 170100000 | -0.21917 | 0.000957862 |
| chr5 | 1.7E+08  | 1.71E+08 | 910  | 795  | 170450000 | 0.12254  | 0.041325914 |
| chr5 | 1.71E+08 | 1.71E+08 | 917  | 961  | 170850000 | -0.13999 | 0.02350541  |
| chr5 | 1.71E+08 | 1.71E+08 | 1016 | 1090 | 170900000 | -0.1738  | 0.006868418 |
| chr5 | 1.71E+08 | 1.71E+08 | 1115 | 1155 | 171050000 | -0.12322 | 0.040159288 |
| chr5 | 1.72E+08 | 1.72E+08 | 866  | 740  | 171700000 | 0.15447  | 0.014437389 |
| chr5 | 1.72E+08 | 1.72E+08 | 948  | 982  | 171850000 | -0.12321 | 0.040175426 |
| chr5 | 1.72E+08 | 1.72E+08 | 1016 | 1073 | 171900000 | -0.15112 | 0.016028274 |
| chr5 | 1.72E+08 | 1.72E+08 | 1018 | 1154 | 171950000 | -0.25328 | 0.000170983 |
| chr5 | 1.72E+08 | 1.72E+08 | 1104 | 1194 | 1.72E+08  | -0.18543 | 0.004291924 |
| chr5 | 1.72E+08 | 1.72E+08 | 976  | 1034 | 172200000 | -0.15565 | 0.013629333 |
| chr5 | 1.72E+08 | 1.72E+08 | 954  | 1018 | 172250000 | -0.16605 | 0.009270406 |
| chr5 | 1.72E+08 | 1.73E+08 | 835  | 725  | 172450000 | 0.131423 | 0.031389294 |
| chr5 | 1.72E+08 | 1.73E+08 | 867  | 759  | 172500000 | 0.11956  | 0.045183123 |
| chr5 | 1.73E+08 | 1.73E+08 | 946  | 799  | 172550000 | 0.171273 | 0.007734169 |
| chr5 | 1.73E+08 | 1.73E+08 | 995  | 1055 | 172750000 | -0.15685 | 0.01305294  |
| chr5 | 1.74E+08 | 1.74E+08 | 935  | 990  | 174400000 | -0.15483 | 0.014039201 |
| chr5 | 1.74E+08 | 1.75E+08 | 993  | 1093 | 174450000 | -0.2108  | 0.001416181 |
| chr5 | 1.74E+08 | 1.75E+08 | 973  | 1043 | 174500000 | -0.1726  | 0.007199921 |
| chr5 | 1.75E+08 | 1.75E+08 | 1054 | 1098 | 174650000 | -0.13137 | 0.031138818 |
| chr5 | 1.75E+08 | 1.75E+08 | 1046 | 1114 | 174700000 | -0.16324 | 0.010307914 |
| chr5 | 1.75E+08 | 1.75E+08 | 1002 | 1061 | 174750000 | -0.15491 | 0.013998804 |
| chr5 | 1.75E+08 | 1.75E+08 | 1034 | 1096 | 175200000 | -0.15638 | 0.01327435  |
| chr5 | 1.75E+08 | 1.75E+08 | 55   | 66   | 175400000 | -0.33541 | 1.16E-06    |
| chr5 | 1.75E+08 | 1.76E+08 | 28   | 33   | 175450000 | -0.30941 | 6.40E-06    |
| chr5 | 1.75E+08 | 1.76E+08 | 22   | 26   | 175500000 | -0.31338 | 4.97E-06    |
| chr5 | 1.76E+08 | 1.76E+08 | 669  | 699  | 175600000 | -0.13566 | 0.027118092 |
| chr5 | 1.76E+08 | 1.76E+08 | 298  | 308  | 175650000 | -0.11999 | 0.044277655 |
| chr5 | 1.76E+08 | 1.76E+08 | 963  | 999  | 175800000 | -0.12532 | 0.037654219 |
| chr5 | 1.76E+08 | 1.76E+08 | 883  | 933  | 175950000 | -0.15184 | 0.01562795  |
| chr5 | 1.76E+08 | 1.76E+08 | 1003 | 1169 | 1.76E+08  | -0.29333 | 1.74E-05    |

|      |          |          |      |      |           |          |             |
|------|----------|----------|------|------|-----------|----------|-------------|
| chr5 | 1.76E+08 | 1.76E+08 | 1087 | 1325 | 176050000 | -0.35801 | 2.39E-07    |
| chr5 | 1.76E+08 | 1.76E+08 | 1096 | 1293 | 176100000 | -0.31085 | 5.84E-06    |
| chr5 | 1.76E+08 | 1.76E+08 | 1072 | 1163 | 176150000 | -0.18992 | 0.003557671 |
| chr5 | 1.76E+08 | 1.76E+08 | 1081 | 1200 | 176200000 | -0.22304 | 0.000795966 |
| chr5 | 1.76E+08 | 1.76E+08 | 1100 | 1270 | 176250000 | -0.2797  | 3.90E-05    |
| chr5 | 1.76E+08 | 1.76E+08 | 1103 | 1193 | 176300000 | -0.18553 | 0.004274418 |
| chr5 | 1.77E+08 | 1.77E+08 | 986  | 1116 | 176800000 | -0.25105 | 0.000192569 |
| chr5 | 1.77E+08 | 1.77E+08 | 1008 | 1160 | 176850000 | -0.275   | 5.12E-05    |
| chr5 | 1.77E+08 | 1.77E+08 | 1060 | 1232 | 176900000 | -0.28931 | 2.21E-05    |
| chr5 | 1.77E+08 | 1.77E+08 | 1041 | 1142 | 176950000 | -0.20596 | 0.001765065 |
| chr5 | 1.77E+08 | 1.77E+08 | 957  | 1032 | 1.77E+08  | -0.18122 | 0.005102224 |
| chr5 | 1.77E+08 | 1.77E+08 | 513  | 575  | 177050000 | -0.23697 | 0.000399823 |
| chr5 | 1.77E+08 | 1.77E+08 | 59   | 39   | 177150000 | 0.524869 | 2.53E-13    |
| chr5 | 1.77E+08 | 1.77E+08 | 19   | 21   | 177250000 | -0.21676 | 0.001073217 |
| chr5 | 1.77E+08 | 1.77E+08 | 23   | 17   | 177300000 | 0.363727 | 1.87E-07    |
| chr5 | 1.77E+08 | 1.78E+08 | 367  | 419  | 177450000 | -0.26354 | 9.78E-05    |
| chr5 | 1.77E+08 | 1.78E+08 | 519  | 598  | 177500000 | -0.27678 | 4.62E-05    |
| chr5 | 1.78E+08 | 1.78E+08 | 863  | 892  | 177550000 | -0.12005 | 0.044191393 |
| chr5 | 1.78E+08 | 1.78E+08 | 874  | 925  | 177600000 | -0.15419 | 0.014367135 |
| chr5 | 1.78E+08 | 1.78E+08 | 985  | 1049 | 177650000 | -0.16319 | 0.010326226 |
| chr5 | 1.78E+08 | 1.78E+08 | 1080 | 1125 | 177700000 | -0.13127 | 0.031247765 |
| chr5 | 1.78E+08 | 1.78E+08 | 1054 | 1127 | 177750000 | -0.16898 | 0.00828528  |
| chr5 | 1.78E+08 | 1.78E+08 | 1068 | 1142 | 177800000 | -0.16902 | 0.008273046 |
| chr5 | 1.78E+08 | 1.78E+08 | 1004 | 1064 | 177850000 | -0.15611 | 0.013406301 |
| chr5 | 1.78E+08 | 1.78E+08 | 982  | 1038 | 177900000 | -0.15238 | 0.015326617 |
| chr5 | 1.78E+08 | 1.78E+08 | 1023 | 1057 | 177950000 | -0.11954 | 0.044875756 |
| chr5 | 1.78E+08 | 1.79E+08 | 920  | 981  | 178450000 | -0.16499 | 0.009649441 |
| chr5 | 1.79E+08 | 1.79E+08 | 1063 | 1128 | 178600000 | -0.158   | 0.012516333 |
| chr5 | 1.79E+08 | 1.79E+08 | 1100 | 1148 | 178650000 | -0.13399 | 0.028628268 |
| chr5 | 1.79E+08 | 1.79E+08 | 1078 | 1134 | 178700000 | -0.14544 | 0.019542554 |
| chr5 | 1.79E+08 | 1.79E+08 | 1036 | 1156 | 178750000 | -0.23049 | 0.00055324  |
| chr5 | 1.79E+08 | 1.79E+08 | 1052 | 1104 | 178800000 | -0.14198 | 0.021985315 |
| chr5 | 1.79E+08 | 1.79E+08 | 805  | 665  | 178950000 | 0.203263 | 0.002057238 |
| chr5 | 1.79E+08 | 1.79E+08 | 965  | 1021 | 179200000 | -0.15375 | 0.01459465  |
| chr5 | 1.79E+08 | 1.79E+08 | 917  | 1110 | 179250000 | -0.34794 | 4.89E-07    |
| chr5 | 1.79E+08 | 1.79E+08 | 911  | 1064 | 179300000 | -0.29635 | 1.44E-05    |
| chr5 | 1.79E+08 | 1.79E+08 | 957  | 995  | 179350000 | -0.12855 | 0.034052931 |
| chr5 | 1.8E+08  | 1.8E+08  | 993  | 1025 | 179550000 | -0.11813 | 0.046798692 |
| chr5 | 1.8E+08  | 1.8E+08  | 966  | 1052 | 179600000 | -0.19541 | 0.002813208 |
| chr5 | 1.8E+08  | 1.8E+08  | 905  | 967  | 179800000 | -0.16797 | 0.008614717 |
| chr5 | 1.8E+08  | 1.8E+08  | 827  | 875  | 179850000 | -0.15377 | 0.014587504 |
| chr5 | 1.8E+08  | 1.8E+08  | 929  | 1003 | 1.80E+08  | -0.18294 | 0.004756224 |
| chr5 | 1.8E+08  | 1.8E+08  | 974  | 1079 | 180050000 | -0.22007 | 0.000917509 |
| chr5 | 1.8E+08  | 1.8E+08  | 885  | 940  | 180200000 | -0.15936 | 0.011907958 |
| chr5 | 1.8E+08  | 1.8E+08  | 974  | 1004 | 180250000 | -0.11614 | 0.049626725 |
| chr5 | 1.8E+08  | 1.8E+08  | 805  | 840  | 180350000 | -0.13377 | 0.028831366 |
| chr5 | 1.8E+08  | 1.81E+08 | 910  | 982  | 180450000 | -0.18223 | 0.004897435 |

|      |          |          |    |    |           |          |             |
|------|----------|----------|----|----|-----------|----------|-------------|
| chr5 | 1.81E+08 | 1.81E+08 | 75 | 78 | 180750000 | -0.12896 | 0.033620948 |
| chr5 | 1.81E+08 | 1.81E+08 | 3  | 1  | 180800000 | 1.512591 | 1.57E-69    |

| cnv | cnv.size | cnv.log2     | cnv.p.value |
|-----|----------|--------------|-------------|
| 21  | 2.00E+05 | -1.487409269 | 2.39E-275   |
| 21  | 2.00E+05 | -1.487409269 | 2.39E-275   |
| 21  | 2.00E+05 | -1.487409269 | 2.39E-275   |
| 21  | 2.00E+05 | -1.487409269 | 2.39E-275   |
| 20  | 250000   | -1.426008725 | 0           |
| 20  | 250000   | -1.426008725 | 0           |
| 20  | 250000   | -1.426008725 | 0           |
| 20  | 250000   | -1.426008725 | 0           |
| 20  | 250000   | -1.426008725 | 0           |
| 19  | 2.00E+05 | 1.734983152  | 0           |
| 19  | 2.00E+05 | 1.734983152  | 0           |
| 18  | 250000   | #NAME?       | 0           |
| 18  | 250000   | #NAME?       | 0           |
| 18  | 250000   | #NAME?       | 0           |
| 18  | 250000   | #NAME?       | 0           |
| 18  | 250000   | #NAME?       | 0           |
| 17  | 250000   | 1.29686204   | 2.08E-272   |
| 17  | 250000   | 1.29686204   | 2.08E-272   |
| 16  | 2.00E+05 | 1.734983152  | 0           |
| 16  | 2.00E+05 | 1.734983152  | 0           |
| 15  | 2.00E+05 | 2.734983152  | 0           |
| 14  | 2.00E+05 | -0.94178766  | 5.78E-136   |
| 14  | 2.00E+05 | -0.94178766  | 5.78E-136   |
| 14  | 2.00E+05 | -0.94178766  | 5.78E-136   |
| 14  | 2.00E+05 | -0.94178766  | 5.78E-136   |
| 13  | 2.00E+05 | #NAME?       | 0           |
| 13  | 2.00E+05 | #NAME?       | 0           |
| 13  | 2.00E+05 | #NAME?       | 0           |
| 13  | 2.00E+05 | #NAME?       | 0           |
| 12  | 250000   | #NAME?       | 0           |
| 12  | 250000   | #NAME?       | 0           |
| 12  | 250000   | #NAME?       | 0           |
| 12  | 250000   | #NAME?       | 0           |
| 12  | 250000   | #NAME?       | 0           |
| 11  | 250000   | -3.242296771 | 0           |
| 11  | 250000   | -3.242296771 | 0           |
| 11  | 250000   | -3.242296771 | 0           |
| 11  | 250000   | -3.242296771 | 0           |
| 11  | 250000   | -3.242296771 | 0           |
| 10  | 2.00E+05 | #NAME?       | 0           |
| 10  | 2.00E+05 | #NAME?       | 0           |
| 10  | 2.00E+05 | #NAME?       | 0           |
| 10  | 2.00E+05 | #NAME?       | 0           |
| 9   | 250000   | #NAME?       | 0           |
| 9   | 250000   | #NAME?       | 0           |
| 9   | 250000   | #NAME?       | 0           |





























































































































































































































































































































































































































































































































































































































































































































































































|      |    |    |
|------|----|----|
| 0 NA | NA | NA |
| 0 NA | NA | NA |
