# Supplementary material
Source: PubMed Central journal article supplement (PMC7863911)
Supplement: supp_RA120.014048_160395_3_supp_602194_qh62m2.pdf [file supp_RA120.014048_160395_3_supp_602194_qh62m2.pdf]

| chromoson | start    | end      | test | ref | position    | log2     | p.value   | cnv |
|-----------|----------|----------|------|-----|-------------|----------|-----------|-----|
| chr10     | 46550001 | 46650000 |      | 2   | 7 46600000  | -1.61139 | 4.72E-58  | 22  |
| chr10     | 46600001 | 46700000 |      | 3   | 8 46650000  | -1.21907 | 5.55E-40  | 22  |
| chr10     | 46650001 | 46750000 |      | 3   | 10 46700000 | -1.541   | 6.69E-55  | 22  |
| chr10     | 46700001 | 46800000 |      | 1   | 4 46750000  | -1.80404 | 2.39E-66  | 22  |
| chr10     | 46750001 | 46850000 |      | 0   | 1 46800000  | #NAME?   | 3.67E-137 | 22  |
| chr9      | 67800001 | 67900000 |      | 2   | 4 67850000  | -0.80404 | 3.29E-21  | 21  |
| chr9      | 67850001 | 67950000 |      | 2   | 5 67900000  | -1.12597 | 1.27E-35  | 21  |
| chr9      | 67900001 | 68000000 |      | 1   | 6 67950000  | -2.389   | 7.64E-88  | 21  |
| chr9      | 67950001 | 68050000 |      | 0   | 2 6.80E+07  | #NAME?   | 3.67E-137 | 21  |
| chr9      | 46500001 | 46600000 |      | 0   | 1 46550000  | #NAME?   | 3.67E-137 | 20  |
| chr9      | 46550001 | 46650000 |      | 0   | 1 46600000  | #NAME?   | 3.67E-137 | 20  |
| chr9      | 46600001 | 46700000 |      | 0   | 2 46650000  | #NAME?   | 3.67E-137 | 20  |
| chr9      | 46650001 | 46750000 |      | 0   | 2 46700000  | #NAME?   | 3.67E-137 | 20  |
| chr9      | 46700001 | 46800000 |      | 1   | 2 46750000  | -0.80404 | 3.29E-21  | 20  |
| chr9      | 46750001 | 46850000 |      | 1   | 2 46800000  | -0.80404 | 3.29E-21  | 20  |
| chr9      | 44350001 | 44450000 |      | 1   | 8 44400000  | -2.80404 | 1.48E-99  | 19  |
| chr9      | 44400001 | 44500000 |      | 5   | 14 44450000 | -1.28946 | 2.77E-43  | 19  |
| chr9      | 44450001 | 44550000 |      | 5   | 13 44500000 | -1.18255 | 2.87E-38  | 19  |
| chr9      | 44500001 | 44600000 |      | 1   | 3 44550000  | -1.389   | 6.26E-48  | 19  |
| chr9      | 44550001 | 44650000 |      | 0   | 3 44600000  | #NAME?   | 3.67E-137 | 19  |
| chr9      | 44600001 | 44700000 |      | 0   | 3 44650000  | #NAME?   | 3.67E-137 | 19  |
| chr9      | 44650001 | 44750000 |      | 6   | 14 44700000 | -1.02643 | 5.11E-31  | 19  |
| chr9      | 40200001 | 40300000 |      | 0   | 2 40250000  | #NAME?   | 3.67E-137 | 18  |
| chr9      | 40250001 | 40350000 |      | 5   | 11 40300000 | -0.94154 | 3.57E-27  | 18  |
| chr9      | 40300001 | 40400000 |      | 5   | 11 40350000 | -0.94154 | 3.57E-27  | 18  |
| chr9      | 40350001 | 40450000 |      | 0   | 1 40400000  | #NAME?   | 3.67E-137 | 18  |
| chr9      | 40400001 | 40500000 |      | 0   | 2 40450000  | #NAME?   | 3.67E-137 | 18  |
| chr9      | 40450001 | 40550000 |      | 1   | 3 40500000  | -1.389   | 6.26E-48  | 18  |
| chr9      | 46050001 | 46150000 |      | 3   | 2 46100000  | 0.780926 | 1.60E-21  | 17  |
| chr9      | 46100001 | 46200000 |      | 5   | 3 46150000  | 0.932929 | 8.75E-29  | 17  |
| chr9      | 46150001 | 46250000 |      | 2   | 1 46200000  | 1.195963 | 1.84E-42  | 17  |
| chr9      | 46200001 | 46300000 |      | 2   | 1 46250000  | 1.195963 | 1.84E-42  | 17  |
| chr15     | 30500001 | 30600000 |      | 2   | 14 30550000 | -2.61139 | 1.81E-94  | 15  |
| chr15     | 30550001 | 30650000 |      | 5   | 16 30600000 | -1.48211 | 3.18E-52  | 15  |
| chr15     | 30600001 | 30700000 |      | 10  | 19 30650000 | -0.73004 | 3.48E-18  | 15  |
| chr15     | 30650001 | 30750000 |      | 8   | 15 30700000 | -0.71093 | 1.98E-17  | 15  |
| chr15     | 30700001 | 30800000 |      | 7   | 13 30750000 | -0.69712 | 6.85E-17  | 15  |
| chr16     | 18300001 | 18400000 |      | 16  | 11 18350000 | 0.736531 | 1.55E-19  | 14  |
| chr16     | 18350001 | 18450000 |      | 9   | 3 18400000  | 1.780926 | 4.68E-73  | 14  |
| chr16     | 18450001 | 18550000 |      | 6   | 4 18500000  | 0.780926 | 1.60E-21  | 14  |
| chr1      | 1.47E+08 | 1.48E+08 |      | 1   | 4 1.48E+08  | -1.80404 | 2.39E-66  | 13  |
| chr1      | 1.48E+08 | 1.48E+08 |      | 1   | 4 1.48E+08  | -1.80404 | 2.39E-66  | 13  |
| chr1      | 1.48E+08 | 1.48E+08 |      | 1   | 4 1.48E+08  | -1.80404 | 2.39E-66  | 13  |
| chr1      | 1.48E+08 | 1.48E+08 |      | 1   | 3 1.48E+08  | -1.389   | 6.26E-48  | 13  |
| chr1      | 13400001 | 13500000 |      | 2   | 1 13450000  | 1.195963 | 1.84E-42  | 12  |
| chr1      | 13450001 | 13550000 |      | 2   | 1 13500000  | 1.195963 | 1.84E-42  | 12  |

|      |          |          |    |    |          |          |           |    |
|------|----------|----------|----|----|----------|----------|-----------|----|
| chrY | 23100001 | 23200000 | 0  | 1  | 23150000 | #NAME?   | 3.67E-137 | 11 |
| chrY | 23150001 | 23250000 | 0  | 2  | 23200000 | #NAME?   | 3.67E-137 | 11 |
| chrY | 23200001 | 23300000 | 0  | 1  | 23250000 | #NAME?   | 3.67E-137 | 11 |
| chrY | 23250001 | 23350000 | 0  | 1  | 23300000 | #NAME?   | 3.67E-137 | 11 |
| chrY | 23300001 | 23400000 | 0  | 1  | 23350000 | #NAME?   | 3.67E-137 | 11 |
| chrY | 21550001 | 21650000 | 1  | 2  | 21600000 | -0.80404 | 3.29E-21  | 10 |
| chrY | 21600001 | 21700000 | 0  | 1  | 21650000 | #NAME?   | 3.67E-137 | 10 |
| chrY | 21650001 | 21750000 | 1  | 2  | 21700000 | -0.80404 | 3.29E-21  | 10 |
| chrY | 21700001 | 21800000 | 1  | 3  | 21750000 | -1.389   | 6.26E-48  | 10 |
| chrY | 21750001 | 21850000 | 0  | 2  | 21800000 | #NAME?   | 3.67E-137 | 10 |
| chrY | 6750001  | 6850000  | 0  | 1  | 6800000  | #NAME?   | 3.67E-137 | 9  |
| chrY | 6800001  | 6900000  | 0  | 1  | 6850000  | #NAME?   | 3.67E-137 | 9  |
| chrY | 6850001  | 6950000  | 0  | 1  | 6900000  | #NAME?   | 3.67E-137 | 9  |
| chrY | 6900001  | 7000000  | 0  | 1  | 6950000  | #NAME?   | 3.67E-137 | 9  |
| chrY | 6450001  | 6550000  | 0  | 2  | 6500000  | #NAME?   | 3.67E-137 | 8  |
| chrY | 6500001  | 6600000  | 1  | 3  | 6550000  | -1.389   | 6.26E-48  | 8  |
| chrY | 6550001  | 6650000  | 1  | 4  | 6600000  | -1.80404 | 2.39E-66  | 8  |
| chrY | 6600001  | 6700000  | 0  | 1  | 6650000  | #NAME?   | 3.67E-137 | 8  |
| chrY | 5800001  | 5900000  | 0  | 1  | 5850000  | #NAME?   | 3.67E-137 | 7  |
| chrY | 5850001  | 5950000  | 0  | 1  | 5900000  | #NAME?   | 3.67E-137 | 7  |
| chrY | 5900001  | 6000000  | 1  | 2  | 5950000  | -0.80404 | 3.29E-21  | 7  |
| chrY | 5950001  | 6050000  | 1  | 4  | 6.00E+06 | -1.80404 | 2.39E-66  | 7  |
| chrY | 6000001  | 6100000  | 0  | 2  | 6050000  | #NAME?   | 3.67E-137 | 7  |
| chrY | 5450001  | 5550000  | 1  | 2  | 5500000  | -0.80404 | 3.29E-21  | 6  |
| chrY | 5500001  | 5600000  | 1  | 2  | 5550000  | -0.80404 | 3.29E-21  | 6  |
| chrY | 5550001  | 5650000  | 2  | 4  | 5600000  | -0.80404 | 3.29E-21  | 6  |
| chrY | 5600001  | 5700000  | 2  | 4  | 5650000  | -0.80404 | 3.29E-21  | 6  |
| chrY | 14500001 | 14600000 | 4  | 2  | 14550000 | 1.195963 | 1.84E-42  | 4  |
| chrY | 14550001 | 14650000 | 3  | 2  | 14600000 | 0.780926 | 1.60E-21  | 4  |
| chrY | 4400001  | 4500000  | 2  | 1  | 4450000  | 1.195963 | 1.84E-42  | 2  |
| chrY | 4450001  | 4550000  | 4  | 1  | 4500000  | 2.195963 | 8.22E-92  | 2  |
| chrY | 4500001  | 4600000  | 3  | 1  | 4550000  | 1.780926 | 4.68E-73  | 2  |
| chrY | 4550001  | 4650000  | 2  | 1  | 4600000  | 1.195963 | 1.84E-42  | 2  |
| chrY | 4600001  | 4700000  | 2  | 1  | 4650000  | 1.195963 | 1.84E-42  | 2  |
| chr7 | 74550001 | 74650000 | 1  | 4  | 74600000 | -1.80404 | 2.39E-66  | 1  |
| chr7 | 74600001 | 74700000 | 1  | 3  | 74650000 | -1.389   | 6.26E-48  | 1  |
| chr7 | 74650001 | 74750000 | 1  | 2  | 74700000 | -0.80404 | 3.29E-21  | 1  |
| chr7 | 74700001 | 74800000 | 0  | 1  | 74750000 | #NAME?   | 3.67E-137 | 1  |
| chr7 | 74750001 | 74850000 | 1  | 4  | 74800000 | -1.80404 | 2.39E-66  | 1  |
| chr7 | 74800001 | 74900000 | 2  | 5  | 74850000 | -1.12597 | 1.27E-35  | 1  |
| chr7 | 74850001 | 74950000 | 1  | 3  | 74900000 | -1.389   | 6.26E-48  | 1  |
| chr7 | 74900001 | 75000000 | 2  | 4  | 74950000 | -0.80404 | 3.29E-21  | 1  |
| chr1 | 1        | 100000   | 21 | 19 | 50000    | 0.340353 | 9.47E-06  | 0  |
| chr1 | 100001   | 200000   | 1  | 4  | 150000   | -1.80404 | 2.39E-66  | 0  |
| chr1 | 150001   | 250000   | 0  | 2  | 2.00E+05 | #NAME?   | 3.67E-137 | 0  |
| chr1 | 200001   | 300000   | 3  | 3  | 250000   | 0.195963 | 0.006694  | 0  |
| chr1 | 250001   | 350000   | 3  | 1  | 3.00E+05 | 1.780926 | 4.68E-73  | 0  |

|      |         |         |      |      |          |          |          |   |
|------|---------|---------|------|------|----------|----------|----------|---|
| chr1 | 450001  | 550000  | 3    | 2    | 5.00E+05 | 0.780926 | 1.60E-21 | 0 |
| chr1 | 500001  | 600000  | 4    | 4    | 550000   | 0.195963 | 0.006694 | 0 |
| chr1 | 550001  | 650000  | 4    | 4    | 6.00E+05 | 0.195963 | 0.006694 | 0 |
| chr1 | 600001  | 700000  | 4    | 3    | 650000   | 0.611001 | 2.44E-14 | 0 |
| chr1 | 800001  | 900000  | 1020 | 1020 | 850000   | 0.195963 | 0.006694 | 0 |
| chr1 | 850001  | 950000  | 1226 | 1149 | 9.00E+05 | 0.289543 | 0.000133 | 0 |
| chr1 | 900001  | 1000000 | 1231 | 1187 | 950000   | 0.248474 | 0.000866 | 0 |
| chr1 | 1000001 | 1100000 | 1192 | 1158 | 1050000  | 0.237712 | 0.00136  | 0 |
| chr1 | 1050001 | 1150000 | 1294 | 1136 | 1100000  | 0.383838 | 7.42E-07 | 0 |
| chr1 | 1100001 | 1200000 | 1285 | 1177 | 1150000  | 0.322617 | 2.48E-05 | 0 |
| chr1 | 1150001 | 1250000 | 1298 | 1212 | 1200000  | 0.294864 | 0.000103 | 0 |
| chr1 | 1200001 | 1300000 | 1317 | 1270 | 1250000  | 0.24839  | 0.000869 | 0 |
| chr1 | 1250001 | 1350000 | 1185 | 1105 | 1300000  | 0.296804 | 9.34E-05 | 0 |
| chr1 | 1300001 | 1400000 | 969  | 886  | 1350000  | 0.325153 | 2.17E-05 | 0 |
| chr1 | 1350001 | 1450000 | 751  | 712  | 1400000  | 0.272899 | 0.000293 | 0 |
| chr1 | 1400001 | 1500000 | 750  | 724  | 1450000  | 0.246864 | 0.000928 | 0 |
| chr1 | 1450001 | 1550000 | 948  | 935  | 1500000  | 0.215884 | 0.003227 | 0 |
| chr1 | 1500001 | 1600000 | 831  | 774  | 1550000  | 0.298478 | 8.59E-05 | 0 |
| chr1 | 1550001 | 1650000 | 561  | 512  | 1600000  | 0.32782  | 1.88E-05 | 0 |
| chr1 | 1600001 | 1700000 | 473  | 461  | 1650000  | 0.233036 | 0.001646 | 0 |
| chr1 | 1650001 | 1750000 | 491  | 472  | 1700000  | 0.252899 | 0.000716 | 0 |
| chr1 | 1700001 | 1800000 | 383  | 380  | 1750000  | 0.207308 | 0.004449 | 0 |
| chr1 | 1750001 | 1850000 | 734  | 701  | 1800000  | 0.262329 | 0.000473 | 0 |
| chr1 | 1800001 | 1900000 | 1151 | 1140 | 1850000  | 0.209817 | 0.004054 | 0 |
| chr1 | 1850001 | 1950000 | 1083 | 1087 | 1900000  | 0.190644 | 0.008056 | 0 |
| chr1 | 2050001 | 2150000 | 1145 | 1116 | 2100000  | 0.232974 | 0.00165  | 0 |
| chr1 | 2100001 | 2200000 | 1193 | 1143 | 2150000  | 0.257732 | 0.00058  | 0 |
| chr1 | 2300001 | 2400000 | 1344 | 1261 | 2350000  | 0.287928 | 0.000144 | 0 |
| chr1 | 2350001 | 2450000 | 1460 | 1378 | 2400000  | 0.279356 | 0.000217 | 0 |
| chr1 | 2400001 | 2500000 | 1379 | 1318 | 2450000  | 0.261235 | 0.000497 | 0 |
| chr1 | 2450001 | 2550000 | 1231 | 1161 | 2500000  | 0.280426 | 0.000206 | 0 |
| chr1 | 2500001 | 2600000 | 1101 | 1082 | 2550000  | 0.221077 | 0.002644 | 0 |
| chr1 | 2550001 | 2650000 | 652  | 656  | 2600000  | 0.187139 | 0.009083 | 0 |
| chr1 | 2600001 | 2700000 | 242  | 224  | 2650000  | 0.307471 | 5.46E-05 | 0 |
| chr1 | 2650001 | 2750000 | 706  | 699  | 2700000  | 0.210339 | 0.003976 | 0 |
| chr1 | 3100001 | 3200000 | 1218 | 1219 | 3150000  | 0.194779 | 0.006978 | 0 |
| chr1 | 3150001 | 3250000 | 1274 | 1222 | 3200000  | 0.256084 | 0.000624 | 0 |
| chr1 | 3200001 | 3300000 | 1285 | 1277 | 3250000  | 0.204973 | 0.004846 | 0 |
| chr1 | 3250001 | 3350000 | 1386 | 1362 | 3300000  | 0.221164 | 0.002635 | 0 |
| chr1 | 3300001 | 3400000 | 1363 | 1330 | 3350000  | 0.231322 | 0.001764 | 0 |
| chr1 | 3350001 | 3450000 | 1322 | 1325 | 3400000  | 0.192693 | 0.007505 | 0 |
| chr1 | 3400001 | 3500000 | 1394 | 1354 | 3450000  | 0.237966 | 0.001346 | 0 |
| chr1 | 3450001 | 3550000 | 1367 | 1273 | 3500000  | 0.298744 | 8.48E-05 | 0 |
| chr1 | 3500001 | 3600000 | 1274 | 1229 | 3550000  | 0.247843 | 0.00089  | 0 |
| chr1 | 3550001 | 3650000 | 1273 | 1267 | 3600000  | 0.202779 | 0.005248 | 0 |
| chr1 | 3600001 | 3700000 | 1246 | 1223 | 3650000  | 0.222843 | 0.002468 | 0 |
| chr1 | 3750001 | 3850000 | 999  | 1005 | 3800000  | 0.187324 | 0.009026 | 0 |

|      |          |          |      |      |          |          |          |   |
|------|----------|----------|------|------|----------|----------|----------|---|
| chr1 | 3800001  | 3900000  | 499  | 492  | 3850000  | 0.216345 | 0.003171 | 0 |
| chr1 | 3900001  | 4000000  | 48   | 47   | 3950000  | 0.226337 | 0.002152 | 0 |
| chr1 | 5100001  | 5200000  | 617  | 842  | 5150000  | -0.25259 | 0.000825 | 0 |
| chr1 | 6200001  | 6300000  | 1117 | 1118 | 6250000  | 0.194672 | 0.007004 | 0 |
| chr1 | 6250001  | 6350000  | 1135 | 1134 | 6300000  | 0.197235 | 0.0064   | 0 |
| chr1 | 6400001  | 6500000  | 934  | 884  | 6450000  | 0.275339 | 0.000262 | 0 |
| chr1 | 6450001  | 6550000  | 950  | 957  | 6500000  | 0.185372 | 0.009643 | 0 |
| chr1 | 6550001  | 6650000  | 1079 | 1014 | 6600000  | 0.2856   | 0.000161 | 0 |
| chr1 | 6600001  | 6700000  | 1071 | 1007 | 6650000  | 0.284858 | 0.000167 | 0 |
| chr1 | 6650001  | 6750000  | 1038 | 1042 | 6700000  | 0.190414 | 0.00812  | 0 |
| chr1 | 8000001  | 8100000  | 1004 | 985  | 8050000  | 0.223527 | 0.002403 | 0 |
| chr1 | 8150001  | 8250000  | 954  | 949  | 8200000  | 0.203544 | 0.005105 | 0 |
| chr1 | 8850001  | 8950000  | 980  | 962  | 8900000  | 0.222708 | 0.002481 | 0 |
| chr1 | 8900001  | 9000000  | 928  | 916  | 8950000  | 0.21474  | 0.00337  | 0 |
| chr1 | 8950001  | 9050000  | 932  | 903  | 9.00E+06 | 0.241567 | 0.001159 | 0 |
| chr1 | 9200001  | 9300000  | 1015 | 995  | 9250000  | 0.224674 | 0.002297 | 0 |
| chr1 | 9250001  | 9350000  | 1085 | 1089 | 9300000  | 0.190654 | 0.008054 | 0 |
| chr1 | 9300001  | 9400000  | 1178 | 1148 | 9350000  | 0.23318  | 0.001636 | 0 |
| chr1 | 9650001  | 9750000  | 1012 | 1006 | 9700000  | 0.204542 | 0.004923 | 0 |
| chr1 | 9700001  | 9800000  | 1018 | 965  | 9750000  | 0.2731   | 0.00029  | 0 |
| chr1 | 9750001  | 9850000  | 960  | 956  | 9800000  | 0.201987 | 0.005401 | 0 |
| chr1 | 9950001  | 10050000 | 820  | 802  | 1.00E+07 | 0.227985 | 0.002016 | 0 |
| chr1 | 10000001 | 10100000 | 768  | 772  | 10050000 | 0.188468 | 0.008681 | 0 |
| chr1 | 10400001 | 10500000 | 935  | 925  | 10450000 | 0.211476 | 0.003811 | 0 |
| chr1 | 10800001 | 10900000 | 1207 | 1199 | 10850000 | 0.205557 | 0.004744 | 0 |
| chr1 | 11000001 | 11100000 | 886  | 886  | 11050000 | 0.195963 | 0.006694 | 0 |
| chr1 | 11050001 | 11150000 | 864  | 822  | 11100000 | 0.267856 | 0.000369 | 0 |
| chr1 | 11100001 | 11200000 | 922  | 895  | 11150000 | 0.238842 | 0.001298 | 0 |
| chr1 | 11200001 | 11300000 | 903  | 890  | 11250000 | 0.216884 | 0.003107 | 0 |
| chr1 | 11700001 | 11800000 | 1088 | 1072 | 11750000 | 0.217337 | 0.003053 | 0 |
| chr1 | 11800001 | 11900000 | 1081 | 1078 | 11850000 | 0.199972 | 0.005806 | 0 |
| chr1 | 11950001 | 12050000 | 977  | 918  | 1.20E+07 | 0.285827 | 0.000159 | 0 |
| chr1 | 13000001 | 13100000 | 3    | 5    | 13050000 | -0.541   | 2.84E-11 | 0 |
| chr1 | 13050001 | 13150000 | 6    | 2    | 13100000 | 1.780926 | 4.68E-73 | 0 |
| chr1 | 13200001 | 13300000 | 3    | 3    | 13250000 | 0.195963 | 0.006694 | 0 |
| chr1 | 13300001 | 13400000 | 2    | 7    | 13350000 | -1.61139 | 4.72E-58 | 0 |
| chr1 | 13350001 | 13450000 | 2    | 7    | 13400000 | -1.61139 | 4.72E-58 | 0 |
| chr1 | 13650001 | 13750000 | 2    | 2    | 13700000 | 0.195963 | 0.006694 | 0 |
| chr1 | 14050001 | 14150000 | 963  | 967  | 14100000 | 0.189983 | 0.008242 | 0 |
| chr1 | 15600001 | 15700000 | 1318 | 1295 | 15650000 | 0.221361 | 0.002615 | 0 |
| chr1 | 15800001 | 15900000 | 1175 | 1163 | 15850000 | 0.210773 | 0.003913 | 0 |
| chr1 | 15850001 | 15950000 | 996  | 962  | 15900000 | 0.246072 | 0.000959 | 0 |
| chr1 | 15900001 | 16000000 | 917  | 903  | 15950000 | 0.218159 | 0.002959 | 0 |
| chr1 | 16050001 | 16150000 | 947  | 951  | 16100000 | 0.189882 | 0.00827  | 0 |
| chr1 | 16100001 | 16200000 | 812  | 790  | 16150000 | 0.23559  | 0.001484 | 0 |
| chr1 | 16150001 | 16250000 | 872  | 868  | 16200000 | 0.202596 | 0.005283 | 0 |
| chr1 | 16400001 | 16500000 | 1127 | 1070 | 16450000 | 0.27084  | 0.000322 | 0 |



|      |          |          |      |      |          |          |          |   |
|------|----------|----------|------|------|----------|----------|----------|---|
| chr1 | 16450001 | 16550000 | 1142 | 1110 | 16500000 | 0.236966 | 0.001402 | 0 |
| chr1 | 16850001 | 16950000 | 622  | 582  | 16900000 | 0.291858 | 0.000119 | 0 |
| chr1 | 16900001 | 17000000 | 763  | 730  | 16950000 | 0.25975  | 0.000531 | 0 |
| chr1 | 17100001 | 17200000 | 27   | 23   | 17150000 | 0.427289 | 4.52E-08 | 0 |
| chr1 | 17550001 | 17650000 | 1138 | 1087 | 17600000 | 0.262112 | 0.000478 | 0 |
| chr1 | 17600001 | 17700000 | 1022 | 990  | 17650000 | 0.241858 | 0.001145 | 0 |
| chr1 | 17650001 | 17750000 | 1020 | 969  | 17700000 | 0.269964 | 0.000335 | 0 |
| chr1 | 17700001 | 17800000 | 962  | 930  | 17750000 | 0.244769 | 0.001014 | 0 |
| chr1 | 19500001 | 19600000 | 1026 | 1014 | 19550000 | 0.212936 | 0.003608 | 0 |
| chr1 | 19800001 | 19900000 | 861  | 866  | 19850000 | 0.187609 | 0.008939 | 0 |
| chr1 | 21050001 | 21150000 | 940  | 933  | 21100000 | 0.206747 | 0.004541 | 0 |
| chr1 | 21500001 | 21600000 | 963  | 956  | 21550000 | 0.206488 | 0.004585 | 0 |
| chr1 | 21550001 | 21650000 | 1072 | 1054 | 21600000 | 0.220393 | 0.002715 | 0 |
| chr1 | 21600001 | 21700000 | 1104 | 1046 | 21650000 | 0.27382  | 0.000281 | 0 |
| chr1 | 21900001 | 22000000 | 1259 | 1267 | 21950000 | 0.186825 | 0.00918  | 0 |
| chr1 | 22050001 | 22150000 | 892  | 894  | 22100000 | 0.192732 | 0.007495 | 0 |
| chr1 | 22200001 | 22300000 | 1131 | 1133 | 22250000 | 0.193414 | 0.007319 | 0 |
| chr1 | 22300001 | 22400000 | 623  | 603  | 22350000 | 0.243037 | 0.00109  | 0 |
| chr1 | 22350001 | 22450000 | 964  | 966  | 22400000 | 0.192973 | 0.007432 | 0 |
| chr1 | 23400001 | 23500000 | 968  | 963  | 23450000 | 0.203434 | 0.005125 | 0 |
| chr1 | 23950001 | 24050000 | 950  | 911  | 2.40E+07 | 0.256439 | 0.000614 | 0 |
| chr1 | 24100001 | 24200000 | 933  | 912  | 24150000 | 0.228806 | 0.001951 | 0 |
| chr1 | 25000001 | 25100000 | 894  | 864  | 25050000 | 0.245207 | 0.000995 | 0 |
| chr1 | 25550001 | 25650000 | 442  | 425  | 25600000 | 0.252547 | 0.000727 | 0 |
| chr1 | 25700001 | 25800000 | 541  | 538  | 25750000 | 0.203985 | 0.005024 | 0 |
| chr1 | 26100001 | 26200000 | 1136 | 1141 | 26150000 | 0.189627 | 0.008343 | 0 |
| chr1 | 26550001 | 26650000 | 1074 | 1057 | 26600000 | 0.218982 | 0.002867 | 0 |
| chr1 | 26600001 | 26700000 | 1130 | 1118 | 26650000 | 0.211366 | 0.003827 | 0 |
| chr1 | 26950001 | 27050000 | 825  | 814  | 2.70E+07 | 0.215328 | 0.003296 | 0 |
| chr1 | 27000001 | 27100000 | 1041 | 1018 | 27050000 | 0.228196 | 0.001999 | 0 |
| chr1 | 27050001 | 27150000 | 1023 | 1025 | 27100000 | 0.193145 | 0.007388 | 0 |
| chr1 | 27100001 | 27200000 | 1031 | 1033 | 27150000 | 0.193167 | 0.007382 | 0 |
| chr1 | 27250001 | 27350000 | 969  | 952  | 27300000 | 0.221498 | 0.002601 | 0 |
| chr1 | 27300001 | 27400000 | 949  | 911  | 27350000 | 0.25492  | 0.000656 | 0 |
| chr1 | 27450001 | 27550000 | 871  | 848  | 27500000 | 0.234571 | 0.001546 | 0 |
| chr1 | 27500001 | 27600000 | 781  | 776  | 27550000 | 0.205229 | 0.004801 | 0 |
| chr1 | 27700001 | 27800000 | 1022 | 981  | 27750000 | 0.255033 | 0.000653 | 0 |
| chr1 | 27800001 | 27900000 | 1105 | 1103 | 27850000 | 0.198577 | 0.006102 | 0 |
| chr1 | 27850001 | 27950000 | 1338 | 1331 | 27900000 | 0.203531 | 0.005107 | 0 |
| chr1 | 27900001 | 28000000 | 1206 | 1209 | 27950000 | 0.192379 | 0.007587 | 0 |
| chr1 | 27950001 | 28050000 | 935  | 938  | 2.80E+07 | 0.191341 | 0.007865 | 0 |
| chr1 | 28000001 | 28100000 | 869  | 856  | 28050000 | 0.217708 | 0.00301  | 0 |
| chr1 | 28050001 | 28150000 | 878  | 866  | 28100000 | 0.215817 | 0.003235 | 0 |
| chr1 | 28200001 | 28300000 | 991  | 971  | 28250000 | 0.225377 | 0.002235 | 0 |
| chr1 | 28450001 | 28550000 | 884  | 889  | 28500000 | 0.187826 | 0.008873 | 0 |
| chr1 | 28500001 | 28600000 | 926  | 874  | 28550000 | 0.279342 | 0.000217 | 0 |
| chr1 | 28550001 | 28650000 | 939  | 901  | 28600000 | 0.255561 | 0.000638 | 0 |

|      |          |          |      |      |          |          |          |   |
|------|----------|----------|------|------|----------|----------|----------|---|
| chr1 | 28600001 | 28700000 | 892  | 847  | 28650000 | 0.270645 | 0.000325 | 0 |
| chr1 | 28650001 | 28750000 | 830  | 824  | 28700000 | 0.20643  | 0.004595 | 0 |
| chr1 | 28900001 | 29000000 | 798  | 781  | 28950000 | 0.227029 | 0.002094 | 0 |
| chr1 | 28950001 | 29050000 | 774  | 735  | 2.90E+07 | 0.270552 | 0.000326 | 0 |
| chr1 | 29000001 | 29100000 | 823  | 801  | 29050000 | 0.235053 | 0.001516 | 0 |
| chr1 | 29150001 | 29250000 | 977  | 980  | 29200000 | 0.19154  | 0.007811 | 0 |
| chr1 | 31300001 | 31400000 | 1147 | 1128 | 31350000 | 0.220061 | 0.00275  | 0 |
| chr1 | 31350001 | 31450000 | 1075 | 1057 | 31400000 | 0.220324 | 0.002722 | 0 |
| chr1 | 31550001 | 31650000 | 770  | 768  | 31600000 | 0.199715 | 0.00586  | 0 |
| chr1 | 31600001 | 31700000 | 826  | 831  | 31650000 | 0.187256 | 0.009047 | 0 |
| chr1 | 32100001 | 32200000 | 1289 | 1280 | 32150000 | 0.206071 | 0.004655 | 0 |
| chr1 | 32150001 | 32250000 | 1365 | 1349 | 32200000 | 0.212974 | 0.003603 | 0 |
| chr1 | 32400001 | 32500000 | 903  | 907  | 32450000 | 0.189586 | 0.008355 | 0 |
| chr1 | 32500001 | 32600000 | 892  | 897  | 32550000 | 0.187899 | 0.008851 | 0 |
| chr1 | 32750001 | 32850000 | 1056 | 1053 | 32800000 | 0.200067 | 0.005786 | 0 |
| chr1 | 33100001 | 33200000 | 890  | 869  | 33150000 | 0.230412 | 0.001829 | 0 |
| chr1 | 33150001 | 33250000 | 1044 | 1015 | 33200000 | 0.236605 | 0.001423 | 0 |
| chr1 | 33200001 | 33300000 | 1008 | 1005 | 33250000 | 0.200263 | 0.005746 | 0 |
| chr1 | 36550001 | 36650000 | 1181 | 1185 | 36600000 | 0.191085 | 0.007935 | 0 |
| chr1 | 36750001 | 36850000 | 1066 | 1060 | 36800000 | 0.204106 | 0.005002 | 0 |
| chr1 | 36800001 | 36900000 | 1091 | 1070 | 36850000 | 0.224003 | 0.002359 | 0 |
| chr1 | 36850001 | 36950000 | 1095 | 1082 | 36900000 | 0.213193 | 0.003573 | 0 |
| chr1 | 37850001 | 37950000 | 1102 | 1096 | 37900000 | 0.203839 | 0.00505  | 0 |
| chr1 | 37900001 | 38000000 | 977  | 945  | 37950000 | 0.244007 | 0.001047 | 0 |
| chr1 | 37950001 | 38050000 | 931  | 906  | 3.80E+07 | 0.235233 | 0.001505 | 0 |
| chr1 | 38000001 | 38100000 | 1063 | 1069 | 38050000 | 0.187843 | 0.008868 | 0 |
| chr1 | 38100001 | 38200000 | 1122 | 1098 | 38150000 | 0.227158 | 0.002083 | 0 |
| chr1 | 38250001 | 38350000 | 1007 | 1011 | 38300000 | 0.190244 | 0.008168 | 0 |
| chr1 | 38350001 | 38450000 | 820  | 823  | 38400000 | 0.190695 | 0.008042 | 0 |
| chr1 | 38400001 | 38500000 | 1031 | 923  | 38450000 | 0.355605 | 3.99E-06 | 0 |
| chr1 | 38450001 | 38550000 | 1134 | 1100 | 38500000 | 0.23988  | 0.001244 | 0 |
| chr1 | 39200001 | 39300000 | 979  | 978  | 39250000 | 0.197437 | 0.006354 | 0 |
| chr1 | 39400001 | 39500000 | 762  | 759  | 39450000 | 0.201654 | 0.005466 | 0 |
| chr1 | 39500001 | 39600000 | 879  | 860  | 39550000 | 0.22749  | 0.002056 | 0 |
| chr1 | 40050001 | 40150000 | 1031 | 1036 | 40100000 | 0.188983 | 0.008529 | 0 |
| chr1 | 40250001 | 40350000 | 940  | 915  | 40300000 | 0.234852 | 0.001529 | 0 |
| chr1 | 40300001 | 40400000 | 939  | 929  | 40350000 | 0.21141  | 0.003821 | 0 |
| chr1 | 40550001 | 40650000 | 987  | 986  | 40600000 | 0.197425 | 0.006357 | 0 |
| chr1 | 41400001 | 41500000 | 1051 | 1044 | 41450000 | 0.205604 | 0.004736 | 0 |
| chr1 | 41800001 | 41900000 | 1287 | 1237 | 41850000 | 0.25313  | 0.000709 | 0 |
| chr1 | 41900001 | 42000000 | 1275 | 1267 | 41950000 | 0.205044 | 0.004834 | 0 |
| chr1 | 41950001 | 42050000 | 1173 | 1159 | 4.20E+07 | 0.213285 | 0.003561 | 0 |
| chr1 | 42700001 | 42800000 | 904  | 910  | 42750000 | 0.186419 | 0.009307 | 0 |
| chr1 | 42750001 | 42850000 | 907  | 895  | 42800000 | 0.215178 | 0.003315 | 0 |
| chr1 | 43800001 | 43900000 | 1092 | 1100 | 43850000 | 0.185432 | 0.009623 | 0 |
| chr1 | 44000001 | 44100000 | 1267 | 1252 | 44050000 | 0.213145 | 0.00358  | 0 |
| chr1 | 44150001 | 44250000 | 1071 | 1055 | 44200000 | 0.217679 | 0.003014 | 0 |

|      |          |          |      |      |          |          |          |   |
|------|----------|----------|------|------|----------|----------|----------|---|
| chr1 | 44350001 | 44450000 | 1232 | 1222 | 44400000 | 0.207721 | 0.004381 | 0 |
| chr1 | 44400001 | 44500000 | 1280 | 1276 | 44450000 | 0.200479 | 0.005702 | 0 |
| chr1 | 45100001 | 45200000 | 1120 | 1061 | 45150000 | 0.274037 | 0.000278 | 0 |
| chr1 | 45150001 | 45250000 | 991  | 893  | 45200000 | 0.346188 | 6.83E-06 | 0 |
| chr1 | 45200001 | 45300000 | 1029 | 963  | 45250000 | 0.291598 | 0.000121 | 0 |
| chr1 | 45950001 | 46050000 | 892  | 828  | 4.60E+07 | 0.303376 | 6.72E-05 | 0 |
| chr1 | 46000001 | 46100000 | 960  | 904  | 46050000 | 0.282675 | 0.000185 | 0 |
| chr1 | 46050001 | 46150000 | 1010 | 1010 | 46100000 | 0.195963 | 0.006694 | 0 |
| chr1 | 46100001 | 46200000 | 910  | 904  | 46150000 | 0.205507 | 0.004753 | 0 |
| chr1 | 46150001 | 46250000 | 818  | 819  | 46200000 | 0.1942   | 0.007121 | 0 |
| chr1 | 48900001 | 49000000 | 718  | 712  | 48950000 | 0.20807  | 0.004325 | 0 |
| chr1 | 50000001 | 50100000 | 516  | 675  | 50050000 | -0.19155 | 0.008282 | 0 |
| chr1 | 50100001 | 50200000 | 556  | 735  | 50150000 | -0.2067  | 0.004894 | 0 |
| chr1 | 50150001 | 50250000 | 556  | 739  | 50200000 | -0.21453 | 0.003684 | 0 |
| chr1 | 50200001 | 50300000 | 575  | 761  | 50250000 | -0.20837 | 0.004609 | 0 |
| chr1 | 52450001 | 52550000 | 855  | 848  | 52500000 | 0.207823 | 0.004365 | 0 |
| chr1 | 52850001 | 52950000 | 960  | 945  | 52900000 | 0.218683 | 0.0029   | 0 |
| chr1 | 53250001 | 53350000 | 834  | 833  | 53300000 | 0.197694 | 0.006297 | 0 |
| chr1 | 53300001 | 53400000 | 897  | 888  | 53350000 | 0.210511 | 0.003951 | 0 |
| chr1 | 53550001 | 53650000 | 1123 | 1131 | 53600000 | 0.185722 | 0.009529 | 0 |
| chr1 | 53600001 | 53700000 | 1044 | 982  | 53650000 | 0.28429  | 0.000172 | 0 |
| chr1 | 53650001 | 53750000 | 1129 | 1090 | 53700000 | 0.24668  | 0.000935 | 0 |
| chr1 | 54750001 | 54850000 | 1163 | 1102 | 54800000 | 0.27369  | 0.000282 | 0 |
| chr1 | 58500001 | 58600000 | 681  | 898  | 58550000 | -0.2031  | 0.005561 | 0 |
| chr1 | 66600001 | 66700000 | 735  | 981  | 66650000 | -0.22055 | 0.002945 | 0 |
| chr1 | 67000001 | 67100000 | 922  | 928  | 67050000 | 0.186605 | 0.009249 | 0 |
| chr1 | 67350001 | 67450000 | 847  | 852  | 67400000 | 0.187472 | 0.008981 | 0 |
| chr1 | 69050001 | 69150000 | 633  | 851  | 69100000 | -0.23099 | 0.001974 | 0 |
| chr1 | 69200001 | 69300000 | 577  | 775  | 69250000 | -0.22966 | 0.002079 | 0 |
| chr1 | 69550001 | 69650000 | 595  | 782  | 69600000 | -0.19832 | 0.006573 | 0 |
| chr1 | 71150001 | 71250000 | 671  | 883  | 71200000 | -0.20014 | 0.006169 | 0 |
| chr1 | 71400001 | 71500000 | 706  | 950  | 71450000 | -0.2323  | 0.001876 | 0 |
| chr1 | 71550001 | 71650000 | 627  | 840  | 71600000 | -0.22596 | 0.002398 | 0 |
| chr1 | 72000001 | 72100000 | 659  | 871  | 72050000 | -0.20643 | 0.00494  | 0 |
| chr1 | 72050001 | 72150000 | 626  | 827  | 72100000 | -0.20576 | 0.00506  | 0 |
| chr1 | 72250001 | 72350000 | 626  | 819  | 72300000 | -0.19174 | 0.008231 | 0 |
| chr1 | 72400001 | 72500000 | 608  | 809  | 72450000 | -0.21611 | 0.003475 | 0 |
| chr1 | 72450001 | 72550000 | 609  | 873  | 72500000 | -0.32358 | 3.05E-05 | 0 |
| chr1 | 72600001 | 72700000 | 574  | 788  | 72650000 | -0.26118 | 0.000573 | 0 |
| chr1 | 72650001 | 72750000 | 605  | 789  | 72700000 | -0.18713 | 0.009603 | 0 |
| chr1 | 73000001 | 73100000 | 566  | 766  | 73050000 | -0.24058 | 0.00135  | 0 |
| chr1 | 73050001 | 73150000 | 586  | 857  | 73100000 | -0.35243 | 6.65E-06 | 0 |
| chr1 | 73100001 | 73200000 | 633  | 829  | 73150000 | -0.1932  | 0.007832 | 0 |
| chr1 | 73300001 | 73400000 | 579  | 766  | 73350000 | -0.20782 | 0.004701 | 0 |
| chr1 | 73350001 | 73450000 | 525  | 694  | 73400000 | -0.20666 | 0.004901 | 0 |
| chr1 | 73400001 | 73500000 | 514  | 673  | 73450000 | -0.19288 | 0.00792  | 0 |
| chr1 | 73650001 | 73750000 | 653  | 881  | 73700000 | -0.2361  | 0.001615 | 0 |

|      |          |          |     |     |          |          |          |   |
|------|----------|----------|-----|-----|----------|----------|----------|---|
| chr1 | 73700001 | 73800000 | 533 | 774 | 73750000 | -0.34223 | 1.15E-05 | 0 |
| chr1 | 73750001 | 73850000 | 519 | 731 | 73800000 | -0.29817 | 0.000107 | 0 |
| chr1 | 73900001 | 74000000 | 539 | 704 | 73950000 | -0.18933 | 0.008925 | 0 |
| chr1 | 74200001 | 74300000 | 607 | 799 | 74250000 | -0.20054 | 0.006084 | 0 |
| chr1 | 74350001 | 74450000 | 625 | 828 | 74400000 | -0.20981 | 0.004375 | 0 |
| chr1 | 74800001 | 74900000 | 619 | 810 | 74850000 | -0.19202 | 0.008153 | 0 |
| chr1 | 76300001 | 76400000 | 610 | 823 | 76350000 | -0.23612 | 0.001614 | 0 |
| chr1 | 76600001 | 76700000 | 684 | 899 | 76650000 | -0.19836 | 0.006562 | 0 |
| chr1 | 77300001 | 77400000 | 642 | 839 | 77350000 | -0.19013 | 0.008687 | 0 |
| chr1 | 78800001 | 78900000 | 604 | 800 | 78850000 | -0.20949 | 0.004427 | 0 |
| chr1 | 79450001 | 79550000 | 583 | 760 | 79500000 | -0.18654 | 0.009791 | 0 |
| chr1 | 79650001 | 79750000 | 550 | 755 | 79700000 | -0.26108 | 0.000576 | 0 |
| chr1 | 79800001 | 79900000 | 601 | 797 | 79850000 | -0.21125 | 0.004153 | 0 |
| chr1 | 80050001 | 80150000 | 553 | 735 | 80100000 | -0.2145  | 0.003687 | 0 |
| chr1 | 80650001 | 80750000 | 587 | 766 | 80700000 | -0.18802 | 0.009322 | 0 |
| chr1 | 80700001 | 80800000 | 588 | 777 | 80750000 | -0.20614 | 0.004993 | 0 |
| chr1 | 81200001 | 81300000 | 579 | 765 | 81250000 | -0.20593 | 0.005029 | 0 |
| chr1 | 81400001 | 81500000 | 552 | 733 | 81450000 | -0.21318 | 0.00387  | 0 |
| chr1 | 81450001 | 81550000 | 611 | 871 | 81500000 | -0.31554 | 4.58E-05 | 0 |
| chr1 | 81500001 | 81600000 | 587 | 825 | 81550000 | -0.29507 | 0.000124 | 0 |
| chr1 | 81700001 | 81800000 | 575 | 757 | 81750000 | -0.20077 | 0.006035 | 0 |
| chr1 | 81900001 | 82000000 | 581 | 761 | 81950000 | -0.1934  | 0.007781 | 0 |
| chr1 | 82100001 | 82200000 | 525 | 698 | 82150000 | -0.21495 | 0.003627 | 0 |
| chr1 | 82500001 | 82600000 | 542 | 736 | 82550000 | -0.24545 | 0.001108 | 0 |
| chr1 | 82550001 | 82650000 | 526 | 755 | 82600000 | -0.32545 | 2.77E-05 | 0 |
| chr1 | 82600001 | 82700000 | 580 | 778 | 82650000 | -0.22775 | 0.002238 | 0 |
| chr1 | 83100001 | 83200000 | 573 | 765 | 83150000 | -0.22096 | 0.002899 | 0 |
| chr1 | 83250001 | 83350000 | 618 | 812 | 83300000 | -0.19791 | 0.006666 | 0 |
| chr1 | 83450001 | 83550000 | 587 | 838 | 83500000 | -0.31763 | 4.12E-05 | 0 |
| chr1 | 83500001 | 83600000 | 624 | 877 | 83550000 | -0.29507 | 0.000124 | 0 |
| chr1 | 83600001 | 83700000 | 57  | 83  | 83650000 | -0.34619 | 9.33E-06 | 0 |
| chr1 | 83700001 | 83800000 | 54  | 73  | 83750000 | -0.23897 | 0.00144  | 0 |
| chr1 | 83750001 | 83850000 | 60  | 84  | 83800000 | -0.28946 | 0.000161 | 0 |
| chr1 | 88400001 | 88500000 | 668 | 885 | 88450000 | -0.20987 | 0.004367 | 0 |
| chr1 | 88450001 | 88550000 | 651 | 866 | 88500000 | -0.21575 | 0.003522 | 0 |
| chr1 | 88600001 | 88700000 | 687 | 914 | 88650000 | -0.21592 | 0.003499 | 0 |
| chr1 | 88650001 | 88750000 | 642 | 853 | 88700000 | -0.21401 | 0.003755 | 0 |
| chr1 | 88700001 | 88800000 | 666 | 884 | 88750000 | -0.21256 | 0.003959 | 0 |
| chr1 | 90850001 | 90950000 | 712 | 960 | 90900000 | -0.23519 | 0.001674 | 0 |
| chr1 | 94300001 | 94400000 | 892 | 849 | 94350000 | 0.267242 | 0.000379 | 0 |
| chr1 | 97450001 | 97550000 | 707 | 933 | 97500000 | -0.2042  | 0.005348 | 0 |
| chr1 | 98050001 | 98150000 | 708 | 934 | 98100000 | -0.20371 | 0.005442 | 0 |
| chr1 | 99150001 | 99250000 | 670 | 874 | 99200000 | -0.18751 | 0.009482 | 0 |
| chr1 | 99800001 | 99900000 | 605 | 800 | 99850000 | -0.2071  | 0.004823 | 0 |
| chr1 | 1.01E+08 | 1.01E+08 | 843 | 844 | 1.01E+08 | 0.194253 | 0.007108 | 0 |
| chr1 | 1.02E+08 | 1.02E+08 | 693 | 912 | 1.02E+08 | -0.20022 | 0.006153 | 0 |
| chr1 | 1.02E+08 | 1.02E+08 | 733 | 956 | 1.02E+08 | -0.18723 | 0.009569 | 0 |

|      |          |          |      |      |          |          |          |   |
|------|----------|----------|------|------|----------|----------|----------|---|
| chr1 | 1.02E+08 | 1.02E+08 | 599  | 785  | 1.02E+08 | -0.19417 | 0.007578 | 0 |
| chr1 | 1.02E+08 | 1.02E+08 | 595  | 784  | 1.02E+08 | -0.202   | 0.00578  | 0 |
| chr1 | 1.03E+08 | 1.03E+08 | 517  | 682  | 1.03E+08 | -0.20364 | 0.005455 | 0 |
| chr1 | 1.03E+08 | 1.03E+08 | 560  | 730  | 1.03E+08 | -0.18651 | 0.009802 | 0 |
| chr1 | 1.03E+08 | 1.04E+08 | 559  | 754  | 1.04E+08 | -0.23575 | 0.001637 | 0 |
| chr1 | 1.04E+08 | 1.04E+08 | 586  | 764  | 1.04E+08 | -0.18671 | 0.009737 | 0 |
| chr1 | 1.04E+08 | 1.04E+08 | 31   | 42   | 1.04E+08 | -0.24216 | 0.001267 | 0 |
| chr1 | 1.04E+08 | 1.04E+08 | 31   | 42   | 1.04E+08 | -0.24216 | 0.001267 | 0 |
| chr1 | 1.04E+08 | 1.04E+08 | 254  | 363  | 1.04E+08 | -0.31918 | 3.81E-05 | 0 |
| chr1 | 1.04E+08 | 1.04E+08 | 41   | 39   | 1.04E+08 | 0.268113 | 0.000365 | 0 |
| chr1 | 1.04E+08 | 1.04E+08 | 1    | 1    | 1.04E+08 | 0.195963 | 0.006694 | 0 |
| chr1 | 1.05E+08 | 1.05E+08 | 583  | 768  | 1.05E+08 | -0.20165 | 0.005852 | 0 |
| chr1 | 1.06E+08 | 1.06E+08 | 467  | 614  | 1.06E+08 | -0.19885 | 0.006451 | 0 |
| chr1 | 1.06E+08 | 1.06E+08 | 443  | 605  | 1.06E+08 | -0.25367 | 0.000789 | 0 |
| chr1 | 1.06E+08 | 1.06E+08 | 496  | 650  | 1.06E+08 | -0.19414 | 0.007587 | 0 |
| chr1 | 1.06E+08 | 1.06E+08 | 541  | 728  | 1.06E+08 | -0.23235 | 0.001872 | 0 |
| chr1 | 1.06E+08 | 1.06E+08 | 531  | 737  | 1.06E+08 | -0.27699 | 0.000286 | 0 |
| chr1 | 1.06E+08 | 1.06E+08 | 547  | 761  | 1.06E+08 | -0.28039 | 0.000245 | 0 |
| chr1 | 1.07E+08 | 1.07E+08 | 590  | 802  | 1.07E+08 | -0.24692 | 0.001043 | 0 |
| chr1 | 1.07E+08 | 1.07E+08 | 578  | 763  | 1.07E+08 | -0.20465 | 0.005264 | 0 |
| chr1 | 1.07E+08 | 1.07E+08 | 575  | 751  | 1.07E+08 | -0.18929 | 0.008937 | 0 |
| chr1 | 1.07E+08 | 1.07E+08 | 551  | 727  | 1.07E+08 | -0.20394 | 0.005398 | 0 |
| chr1 | 1.07E+08 | 1.07E+08 | 595  | 804  | 1.07E+08 | -0.23834 | 0.001477 | 0 |
| chr1 | 1.07E+08 | 1.07E+08 | 602  | 786  | 1.07E+08 | -0.1888  | 0.009083 | 0 |
| chr1 | 1.08E+08 | 1.08E+08 | 760  | 1021 | 1.08E+08 | -0.22995 | 0.002056 | 0 |
| chr1 | 1.09E+08 | 1.09E+08 | 60   | 60   | 1.09E+08 | 0.195963 | 0.006694 | 0 |
| chr1 | 1.1E+08  | 1.1E+08  | 797  | 771  | 1.1E+08  | 0.243812 | 0.001055 | 0 |
| chr1 | 1.1E+08  | 1.1E+08  | 1092 | 1052 | 1.10E+08 | 0.249801 | 0.000819 | 0 |
| chr1 | 1.1E+08  | 1.1E+08  | 1172 | 1147 | 1.1E+08  | 0.22707  | 0.00209  | 0 |
| chr1 | 1.11E+08 | 1.11E+08 | 1058 | 1025 | 1.11E+08 | 0.241679 | 0.001154 | 0 |
| chr1 | 1.11E+08 | 1.11E+08 | 1181 | 1187 | 1.11E+08 | 0.188652 | 0.008626 | 0 |
| chr1 | 1.13E+08 | 1.13E+08 | 649  | 852  | 1.13E+08 | -0.19667 | 0.006956 | 0 |
| chr1 | 1.13E+08 | 1.13E+08 | 947  | 943  | 1.13E+08 | 0.20207  | 0.005384 | 0 |
| chr1 | 1.13E+08 | 1.14E+08 | 839  | 842  | 1.13E+08 | 0.190814 | 0.008009 | 0 |
| chr1 | 1.14E+08 | 1.14E+08 | 788  | 790  | 1.14E+08 | 0.192306 | 0.007607 | 0 |
| chr1 | 1.14E+08 | 1.14E+08 | 900  | 891  | 1.14E+08 | 0.210463 | 0.003958 | 0 |
| chr1 | 1.14E+08 | 1.14E+08 | 913  | 857  | 1.14E+08 | 0.287283 | 0.000149 | 0 |
| chr1 | 1.14E+08 | 1.14E+08 | 823  | 803  | 1.14E+08 | 0.231455 | 0.001754 | 0 |
| chr1 | 1.16E+08 | 1.16E+08 | 653  | 852  | 1.16E+08 | -0.18781 | 0.009389 | 0 |
| chr1 | 1.19E+08 | 1.19E+08 | 633  | 834  | 1.19E+08 | -0.20188 | 0.005805 | 0 |
| chr1 | 1.19E+08 | 1.19E+08 | 551  | 725  | 1.19E+08 | -0.19997 | 0.006206 | 0 |
| chr1 | 1.2E+08  | 1.2E+08  | 590  | 779  | 1.2E+08  | -0.20495 | 0.005209 | 0 |
| chr1 | 1.2E+08  | 1.2E+08  | 677  | 897  | 1.2E+08  | -0.20999 | 0.004347 | 0 |
| chr1 | 1.2E+08  | 1.2E+08  | 553  | 731  | 1.2E+08  | -0.20663 | 0.004906 | 0 |
| chr1 | 1.21E+08 | 1.21E+08 | 45   | 69   | 1.21E+08 | -0.42071 | 1.20E-07 | 0 |
| chr1 | 1.21E+08 | 1.21E+08 | 19   | 34   | 1.21E+08 | -0.64357 | 7.33E-15 | 0 |
| chr1 | 1.21E+08 | 1.21E+08 | 7    | 5    | 1.21E+08 | 0.68139  | 3.58E-17 | 0 |

|      |          |          |      |     |          |          |           |   |
|------|----------|----------|------|-----|----------|----------|-----------|---|
| chr1 | 1.21E+08 | 1.21E+08 | 17   | 16  | 1.21E+08 | 0.283426 | 0.000179  | 0 |
| chr1 | 1.21E+08 | 1.21E+08 | 15   | 15  | 1.21E+08 | 0.195963 | 0.006694  | 0 |
| chr1 | 1.21E+08 | 1.21E+08 | 8    | 14  | 1.21E+08 | -0.61139 | 1.08E-13  | 0 |
| chr1 | 1.21E+08 | 1.21E+08 | 5    | 10  | 1.21E+08 | -0.80404 | 3.29E-21  | 0 |
| chr1 | 1.43E+08 | 1.43E+08 | 176  | 167 | 1.43E+08 | 0.27169  | 0.00031   | 0 |
| chr1 | 1.43E+08 | 1.43E+08 | 44   | 74  | 1.43E+08 | -0.55406 | 1.05E-11  | 0 |
| chr1 | 1.43E+08 | 1.43E+08 | 33   | 63  | 1.43E+08 | -0.73692 | 1.85E-18  | 0 |
| chr1 | 1.43E+08 | 1.43E+08 | 59   | 100 | 1.43E+08 | -0.56525 | 4.40E-12  | 0 |
| chr1 | 1.43E+08 | 1.43E+08 | 40   | 71  | 1.43E+08 | -0.63186 | 1.97E-14  | 0 |
| chr1 | 1.43E+08 | 1.43E+08 | 29   | 39  | 1.43E+08 | -0.23146 | 0.001939  | 0 |
| chr1 | 1.43E+08 | 1.43E+08 | 31   | 30  | 1.43E+08 | 0.243269 | 0.00108   | 0 |
| chr1 | 1.43E+08 | 1.43E+08 | 6    | 6   | 1.43E+08 | 0.195963 | 0.006694  | 0 |
| chr1 | 1.43E+08 | 1.43E+08 | 25   | 22  | 1.43E+08 | 0.380388 | 9.16E-07  | 0 |
| chr1 | 1.43E+08 | 1.43E+08 | 50   | 48  | 1.43E+08 | 0.254857 | 0.000658  | 0 |
| chr1 | 1.43E+08 | 1.43E+08 | 43   | 59  | 1.43E+08 | -0.26042 | 0.000592  | 0 |
| chr1 | 1.43E+08 | 1.43E+08 | 60   | 56  | 1.43E+08 | 0.295499 | 9.96E-05  | 0 |
| chr1 | 1.43E+08 | 1.43E+08 | 7    | 6   | 1.43E+08 | 0.418355 | 8.19E-08  | 0 |
| chr1 | 1.43E+08 | 1.43E+08 | 21   | 36  | 1.43E+08 | -0.58164 | 1.21E-12  | 0 |
| chr1 | 1.43E+08 | 1.44E+08 | 45   | 70  | 1.43E+08 | -0.44147 | 3.19E-08  | 0 |
| chr1 | 1.44E+08 | 1.44E+08 | 2    | 1   | 1.44E+08 | 1.195963 | 1.84E-42  | 0 |
| chr1 | 1.44E+08 | 1.44E+08 | 3    | 4   | 1.44E+08 | -0.21907 | 0.003112  | 0 |
| chr1 | 1.44E+08 | 1.44E+08 | 5    | 11  | 1.44E+08 | -0.94154 | 3.57E-27  | 0 |
| chr1 | 1.44E+08 | 1.44E+08 | 4    | 8   | 1.44E+08 | -0.80404 | 3.29E-21  | 0 |
| chr1 | 1.44E+08 | 1.44E+08 | 24   | 20  | 1.44E+08 | 0.458997 | 5.01E-09  | 0 |
| chr1 | 1.44E+08 | 1.44E+08 | 15   | 15  | 1.44E+08 | 0.195963 | 0.006694  | 0 |
| chr1 | 1.44E+08 | 1.44E+08 | 0    | 2   | 1.44E+08 | #NAME?   | 3.67E-137 | 0 |
| chr1 | 1.44E+08 | 1.44E+08 | 2    | 3   | 1.44E+08 | -0.389   | 8.31E-07  | 0 |
| chr1 | 1.44E+08 | 1.44E+08 | 2    | 1   | 1.44E+08 | 1.195963 | 1.84E-42  | 0 |
| chr1 | 1.44E+08 | 1.45E+08 | 2    | 5   | 1.44E+08 | -1.12597 | 1.27E-35  | 0 |
| chr1 | 1.45E+08 | 1.45E+08 | 67   | 57  | 1.45E+08 | 0.429162 | 3.98E-08  | 0 |
| chr1 | 1.45E+08 | 1.45E+08 | 26   | 26  | 1.45E+08 | 0.195963 | 0.006694  | 0 |
| chr1 | 1.45E+08 | 1.45E+08 | 13   | 18  | 1.45E+08 | -0.27352 | 0.000334  | 0 |
| chr1 | 1.45E+08 | 1.45E+08 | 2    | 2   | 1.45E+08 | 0.195963 | 0.006694  | 0 |
| chr1 | 1.45E+08 | 1.45E+08 | 38   | 54  | 1.45E+08 | -0.311   | 5.74E-05  | 0 |
| chr1 | 1.45E+08 | 1.45E+08 | 173  | 162 | 1.45E+08 | 0.290741 | 0.000126  | 0 |
| chr1 | 1.45E+08 | 1.45E+08 | 630  | 615 | 1.45E+08 | 0.230728 | 0.001806  | 0 |
| chr1 | 1.45E+08 | 1.46E+08 | 973  | 957 | 1.45E+08 | 0.219884 | 0.002769  | 0 |
| chr1 | 1.45E+08 | 1.46E+08 | 1007 | 980 | 1.46E+08 | 0.235173 | 0.001509  | 0 |
| chr1 | 1.46E+08 | 1.46E+08 | 497  | 466 | 1.46E+08 | 0.288879 | 0.000138  | 0 |
| chr1 | 1.46E+08 | 1.46E+08 | 4    | 7   | 1.46E+08 | -0.61139 | 1.08E-13  | 0 |
| chr1 | 1.46E+08 | 1.46E+08 | 4    | 9   | 1.46E+08 | -0.97396 | 1.25E-28  | 0 |
| chr1 | 1.46E+08 | 1.46E+08 | 0    | 2   | 1.46E+08 | #NAME?   | 3.67E-137 | 0 |
| chr1 | 1.46E+08 | 1.47E+08 | 29   | 47  | 1.46E+08 | -0.50064 | 5.56E-10  | 0 |
| chr1 | 1.47E+08 | 1.48E+08 | 14   | 11  | 1.47E+08 | 0.543886 | 7.53E-12  | 0 |
| chr1 | 1.48E+08 | 1.48E+08 | 5    | 4   | 1.48E+08 | 0.517891 | 6.05E-11  | 0 |
| chr1 | 1.48E+08 | 1.48E+08 | 1    | 4   | 1.48E+08 | -1.80404 | 2.39E-66  | 0 |
| chr1 | 1.48E+08 | 1.48E+08 | 3    | 8   | 1.48E+08 | -1.21907 | 5.55E-40  | 0 |

|      |          |          |      |      |          |          |           |   |
|------|----------|----------|------|------|----------|----------|-----------|---|
| chr1 | 1.48E+08 | 1.48E+08 | 3    | 7    | 1.48E+08 | -1.02643 | 5.11E-31  | 0 |
| chr1 | 1.48E+08 | 1.48E+08 | 9    | 6    | 1.48E+08 | 0.780926 | 1.60E-21  | 0 |
| chr1 | 1.48E+08 | 1.48E+08 | 24   | 22   | 1.48E+08 | 0.321494 | 2.63E-05  | 0 |
| chr1 | 1.48E+08 | 1.48E+08 | 2    | 5    | 1.48E+08 | -1.12597 | 1.27E-35  | 0 |
| chr1 | 1.48E+08 | 1.48E+08 | 10   | 9    | 1.48E+08 | 0.347966 | 6.17E-06  | 0 |
| chr1 | 1.48E+08 | 1.48E+08 | 8    | 5    | 1.48E+08 | 0.874035 | 6.80E-26  | 0 |
| chr1 | 1.49E+08 | 1.49E+08 | 8    | 11   | 1.49E+08 | -0.26347 | 0.000519  | 0 |
| chr1 | 1.49E+08 | 1.49E+08 | 3    | 5    | 1.49E+08 | -0.541   | 2.84E-11  | 0 |
| chr1 | 1.49E+08 | 1.49E+08 | 12   | 11   | 1.49E+08 | 0.321494 | 2.63E-05  | 0 |
| chr1 | 1.49E+08 | 1.49E+08 | 94   | 124  | 1.49E+08 | -0.20364 | 0.005455  | 0 |
| chr1 | 1.49E+08 | 1.49E+08 | 49   | 75   | 1.49E+08 | -0.41815 | 1.41E-07  | 0 |
| chr1 | 1.49E+08 | 1.49E+08 | 65   | 89   | 1.49E+08 | -0.2574  | 0.000673  | 0 |
| chr1 | 1.49E+08 | 1.5E+08  | 6    | 5    | 1.49E+08 | 0.458997 | 5.01E-09  | 0 |
| chr1 | 1.49E+08 | 1.5E+08  | 0    | 1    | 1.5E+08  | #NAME?   | 3.67E-137 | 0 |
| chr1 | 1.5E+08  | 1.5E+08  | 5    | 3    | 1.5E+08  | 0.932929 | 8.75E-29  | 0 |
| chr1 | 1.5E+08  | 1.5E+08  | 6    | 5    | 1.5E+08  | 0.458997 | 5.01E-09  | 0 |
| chr1 | 1.5E+08  | 1.5E+08  | 615  | 558  | 1.5E+08  | 0.336284 | 1.19E-05  | 0 |
| chr1 | 1.5E+08  | 1.5E+08  | 956  | 958  | 1.5E+08  | 0.192948 | 0.007439  | 0 |
| chr1 | 1.5E+08  | 1.51E+08 | 953  | 946  | 1.51E+08 | 0.206599 | 0.004566  | 0 |
| chr1 | 1.51E+08 | 1.51E+08 | 892  | 849  | 1.51E+08 | 0.267242 | 0.000379  | 0 |
| chr1 | 1.51E+08 | 1.51E+08 | 907  | 880  | 1.51E+08 | 0.239562 | 0.00126   | 0 |
| chr1 | 1.51E+08 | 1.51E+08 | 1005 | 959  | 1.51E+08 | 0.263556 | 0.000448  | 0 |
| chr1 | 1.51E+08 | 1.52E+08 | 995  | 976  | 1.51E+08 | 0.223778 | 0.00238   | 0 |
| chr1 | 1.52E+08 | 1.52E+08 | 967  | 953  | 1.52E+08 | 0.217003 | 0.003092  | 0 |
| chr1 | 1.52E+08 | 1.52E+08 | 1058 | 1042 | 1.52E+08 | 0.217947 | 0.002983  | 0 |
| chr1 | 1.52E+08 | 1.52E+08 | 597  | 790  | 1.52E+08 | -0.20816 | 0.004644  | 0 |
| chr1 | 1.52E+08 | 1.52E+08 | 501  | 677  | 1.52E+08 | -0.23838 | 0.001475  | 0 |
| chr1 | 1.54E+08 | 1.54E+08 | 1034 | 1004 | 1.54E+08 | 0.23844  | 0.00132   | 0 |
| chr1 | 1.54E+08 | 1.54E+08 | 1014 | 964  | 1.54E+08 | 0.268916 | 0.000352  | 0 |
| chr1 | 1.54E+08 | 1.54E+08 | 1048 | 996  | 1.54E+08 | 0.269384 | 0.000344  | 0 |
| chr1 | 1.54E+08 | 1.54E+08 | 990  | 971  | 1.54E+08 | 0.22392  | 0.002366  | 0 |
| chr1 | 1.54E+08 | 1.54E+08 | 924  | 888  | 1.54E+08 | 0.253296 | 0.000704  | 0 |
| chr1 | 1.54E+08 | 1.54E+08 | 1015 | 971  | 1.54E+08 | 0.2599   | 0.000527  | 0 |
| chr1 | 1.55E+08 | 1.55E+08 | 1204 | 1087 | 1.55E+08 | 0.343446 | 7.96E-06  | 0 |
| chr1 | 1.55E+08 | 1.55E+08 | 1254 | 1167 | 1.55E+08 | 0.299696 | 8.09E-05  | 0 |
| chr1 | 1.55E+08 | 1.55E+08 | 1176 | 1128 | 1.55E+08 | 0.256084 | 0.000624  | 0 |
| chr1 | 1.55E+08 | 1.55E+08 | 1032 | 966  | 1.55E+08 | 0.291311 | 0.000122  | 0 |
| chr1 | 1.55E+08 | 1.55E+08 | 1190 | 1086 | 1.55E+08 | 0.327901 | 1.87E-05  | 0 |
| chr1 | 1.55E+08 | 1.55E+08 | 1147 | 1052 | 1.55E+08 | 0.320694 | 2.75E-05  | 0 |
| chr1 | 1.55E+08 | 1.55E+08 | 1039 | 1010 | 1.55E+08 | 0.236803 | 0.001412  | 0 |
| chr1 | 1.56E+08 | 1.56E+08 | 982  | 974  | 1.56E+08 | 0.207764 | 0.004374  | 0 |
| chr1 | 1.56E+08 | 1.56E+08 | 1065 | 1067 | 1.56E+08 | 0.193256 | 0.007359  | 0 |
| chr1 | 1.56E+08 | 1.56E+08 | 1281 | 1242 | 1.56E+08 | 0.240568 | 0.001209  | 0 |
| chr1 | 1.56E+08 | 1.56E+08 | 1322 | 1273 | 1.56E+08 | 0.250453 | 0.000796  | 0 |
| chr1 | 1.56E+08 | 1.56E+08 | 1031 | 1033 | 1.56E+08 | 0.193167 | 0.007382  | 0 |
| chr1 | 1.57E+08 | 1.57E+08 | 1213 | 1191 | 1.57E+08 | 0.222369 | 0.002514  | 0 |
| chr1 | 1.57E+08 | 1.57E+08 | 1251 | 1192 | 1.57E+08 | 0.265661 | 0.000407  | 0 |

|      |          |          |      |      |          |          |          |   |
|------|----------|----------|------|------|----------|----------|----------|---|
| chr1 | 1.57E+08 | 1.57E+08 | 1071 | 1026 | 1.57E+08 | 0.257891 | 0.000576 | 0 |
| chr1 | 1.57E+08 | 1.57E+08 | 1222 | 1202 | 1.57E+08 | 0.21977  | 0.002781 | 0 |
| chr1 | 1.57E+08 | 1.57E+08 | 1292 | 1257 | 1.57E+08 | 0.235584 | 0.001484 | 0 |
| chr1 | 1.58E+08 | 1.58E+08 | 718  | 970  | 1.58E+08 | -0.23804 | 0.001495 | 0 |
| chr1 | 1.59E+08 | 1.59E+08 | 631  | 841  | 1.59E+08 | -0.2185  | 0.003179 | 0 |
| chr1 | 1.59E+08 | 1.59E+08 | 648  | 846  | 1.59E+08 | -0.1887  | 0.009114 | 0 |
| chr1 | 1.59E+08 | 1.59E+08 | 640  | 835  | 1.59E+08 | -0.18774 | 0.009409 | 0 |
| chr1 | 1.61E+08 | 1.61E+08 | 1084 | 1062 | 1.61E+08 | 0.225544 | 0.00222  | 0 |
| chr1 | 1.61E+08 | 1.61E+08 | 513  | 503  | 1.61E+08 | 0.224363 | 0.002326 | 0 |
| chr1 | 1.61E+08 | 1.62E+08 | 426  | 408  | 1.62E+08 | 0.258247 | 0.000567 | 0 |
| chr1 | 1.62E+08 | 1.62E+08 | 149  | 121  | 1.62E+08 | 0.496268 | 3.22E-10 | 0 |
| chr1 | 1.62E+08 | 1.62E+08 | 152  | 121  | 1.62E+08 | 0.525027 | 3.44E-11 | 0 |
| chr1 | 1.63E+08 | 1.63E+08 | 746  | 973  | 1.63E+08 | -0.1873  | 0.009548 | 0 |
| chr1 | 1.63E+08 | 1.64E+08 | 668  | 872  | 1.63E+08 | -0.18852 | 0.00917  | 0 |
| chr1 | 1.63E+08 | 1.64E+08 | 648  | 845  | 1.64E+08 | -0.18699 | 0.009645 | 0 |
| chr1 | 1.64E+08 | 1.64E+08 | 642  | 851  | 1.64E+08 | -0.21062 | 0.004249 | 0 |
| chr1 | 1.64E+08 | 1.64E+08 | 594  | 777  | 1.64E+08 | -0.19149 | 0.0083   | 0 |
| chr1 | 1.64E+08 | 1.64E+08 | 628  | 829  | 1.64E+08 | -0.20464 | 0.005265 | 0 |
| chr1 | 1.64E+08 | 1.64E+08 | 605  | 838  | 1.64E+08 | -0.27405 | 0.000326 | 0 |
| chr1 | 1.64E+08 | 1.64E+08 | 729  | 955  | 1.64E+08 | -0.19362 | 0.007722 | 0 |
| chr1 | 1.64E+08 | 1.64E+08 | 676  | 934  | 1.64E+08 | -0.27044 | 0.000383 | 0 |
| chr1 | 1.67E+08 | 1.67E+08 | 874  | 844  | 1.67E+08 | 0.246353 | 0.000948 | 0 |
| chr1 | 1.67E+08 | 1.67E+08 | 1007 | 982  | 1.67E+08 | 0.232232 | 0.0017   | 0 |
| chr1 | 1.7E+08  | 1.7E+08  | 596  | 781  | 1.7E+08  | -0.19405 | 0.007611 | 0 |
| chr1 | 1.71E+08 | 1.71E+08 | 630  | 824  | 1.71E+08 | -0.19133 | 0.008345 | 0 |
| chr1 | 1.71E+08 | 1.71E+08 | 691  | 912  | 1.71E+08 | -0.20439 | 0.005314 | 0 |
| chr1 | 1.74E+08 | 1.74E+08 | 654  | 890  | 1.74E+08 | -0.24855 | 0.000976 | 0 |
| chr1 | 1.75E+08 | 1.75E+08 | 577  | 755  | 1.75E+08 | -0.19194 | 0.008174 | 0 |
| chr1 | 1.75E+08 | 1.75E+08 | 727  | 956  | 1.75E+08 | -0.19909 | 0.006398 | 0 |
| chr1 | 1.75E+08 | 1.75E+08 | 661  | 894  | 1.75E+08 | -0.23966 | 0.001401 | 0 |
| chr1 | 1.76E+08 | 1.76E+08 | 733  | 957  | 1.76E+08 | -0.18874 | 0.009101 | 0 |
| chr1 | 1.76E+08 | 1.76E+08 | 560  | 754  | 1.76E+08 | -0.23317 | 0.001813 | 0 |
| chr1 | 1.76E+08 | 1.77E+08 | 654  | 876  | 1.76E+08 | -0.22568 | 0.002424 | 0 |
| chr1 | 1.77E+08 | 1.77E+08 | 659  | 879  | 1.77E+08 | -0.21962 | 0.003049 | 0 |
| chr1 | 1.77E+08 | 1.77E+08 | 639  | 895  | 1.77E+08 | -0.29011 | 0.000157 | 0 |
| chr1 | 1.77E+08 | 1.77E+08 | 693  | 943  | 1.77E+08 | -0.24844 | 0.00098  | 0 |
| chr1 | 1.77E+08 | 1.77E+08 | 741  | 992  | 1.77E+08 | -0.2249  | 0.002497 | 0 |
| chr1 | 1.77E+08 | 1.77E+08 | 684  | 899  | 1.77E+08 | -0.19836 | 0.006562 | 0 |
| chr1 | 1.78E+08 | 1.78E+08 | 654  | 858  | 1.78E+08 | -0.19572 | 0.007187 | 0 |
| chr1 | 1.82E+08 | 1.82E+08 | 808  | 1059 | 1.82E+08 | -0.19431 | 0.007542 | 0 |
| chr1 | 1.82E+08 | 1.82E+08 | 817  | 1080 | 1.82E+08 | -0.20666 | 0.0049   | 0 |
| chr1 | 1.82E+08 | 1.83E+08 | 703  | 934  | 1.82E+08 | -0.21393 | 0.003765 | 0 |
| chr1 | 1.83E+08 | 1.83E+08 | 1003 | 991  | 1.83E+08 | 0.213328 | 0.003555 | 0 |
| chr1 | 1.83E+08 | 1.83E+08 | 897  | 899  | 1.83E+08 | 0.19275  | 0.00749  | 0 |
| chr1 | 1.87E+08 | 1.87E+08 | 671  | 888  | 1.87E+08 | -0.20828 | 0.004623 | 0 |
| chr1 | 1.87E+08 | 1.87E+08 | 721  | 955  | 1.87E+08 | -0.20954 | 0.004419 | 0 |
| chr1 | 1.89E+08 | 1.89E+08 | 618  | 806  | 1.89E+08 | -0.18721 | 0.009577 | 0 |



|      |          |          |      |      |          |          |          |   |
|------|----------|----------|------|------|----------|----------|----------|---|
| chr1 | 1.89E+08 | 1.89E+08 | 545  | 762  | 1.89E+08 | -0.28757 | 0.000176 | 0 |
| chr1 | 1.9E+08  | 1.9E+08  | 657  | 890  | 1.9E+08  | -0.24195 | 0.001278 | 0 |
| chr1 | 1.9E+08  | 1.9E+08  | 658  | 859  | 1.9E+08  | -0.18861 | 0.009142 | 0 |
| chr1 | 1.9E+08  | 1.9E+08  | 640  | 836  | 1.9E+08  | -0.18947 | 0.008883 | 0 |
| chr1 | 1.91E+08 | 1.91E+08 | 641  | 837  | 1.91E+08 | -0.18894 | 0.009041 | 0 |
| chr1 | 1.91E+08 | 1.91E+08 | 594  | 781  | 1.91E+08 | -0.1989  | 0.006442 | 0 |
| chr1 | 1.94E+08 | 1.94E+08 | 589  | 769  | 1.94E+08 | -0.18875 | 0.009098 | 0 |
| chr1 | 1.95E+08 | 1.95E+08 | 570  | 758  | 1.95E+08 | -0.21527 | 0.003584 | 0 |
| chr1 | 1.95E+08 | 1.95E+08 | 573  | 763  | 1.95E+08 | -0.21718 | 0.003339 | 0 |
| chr1 | 1.95E+08 | 1.95E+08 | 619  | 842  | 1.95E+08 | -0.24792 | 0.001002 | 0 |
| chr1 | 1.96E+08 | 1.96E+08 | 606  | 815  | 1.96E+08 | -0.23152 | 0.001934 | 0 |
| chr1 | 1.96E+08 | 1.96E+08 | 633  | 835  | 1.96E+08 | -0.20361 | 0.005462 | 0 |
| chr1 | 1.97E+08 | 1.97E+08 | 654  | 863  | 1.97E+08 | -0.20411 | 0.005366 | 0 |
| chr1 | 1.97E+08 | 1.97E+08 | 248  | 336  | 1.97E+08 | -0.24216 | 0.001267 | 0 |
| chr1 | 1.99E+08 | 1.99E+08 | 672  | 917  | 1.99E+08 | -0.2525  | 0.000828 | 0 |
| chr1 | 1.99E+08 | 1.99E+08 | 642  | 905  | 1.99E+08 | -0.29938 | 0.000101 | 0 |
| chr1 | 1.99E+08 | 1.99E+08 | 615  | 821  | 1.99E+08 | -0.22083 | 0.002913 | 0 |
| chr1 | 2.02E+08 | 2.02E+08 | 1161 | 1160 | 2.02E+08 | 0.197206 | 0.006406 | 0 |
| chr1 | 2.02E+08 | 2.02E+08 | 1050 | 1058 | 2.02E+08 | 0.185013 | 0.00976  | 0 |
| chr1 | 2.02E+08 | 2.02E+08 | 972  | 929  | 2.02E+08 | 0.261241 | 0.000497 | 0 |
| chr1 | 2.02E+08 | 2.02E+08 | 1048 | 1051 | 2.02E+08 | 0.191839 | 0.007731 | 0 |
| chr1 | 2.02E+08 | 2.02E+08 | 1133 | 1063 | 2.02E+08 | 0.287969 | 0.000144 | 0 |
| chr1 | 2.03E+08 | 2.03E+08 | 1062 | 1062 | 2.03E+08 | 0.195963 | 0.006694 | 0 |
| chr1 | 2.04E+08 | 2.04E+08 | 1156 | 1142 | 2.04E+08 | 0.213542 | 0.003527 | 0 |
| chr1 | 2.04E+08 | 2.05E+08 | 1069 | 1067 | 2.04E+08 | 0.198665 | 0.006083 | 0 |
| chr1 | 2.05E+08 | 2.05E+08 | 1074 | 1082 | 2.05E+08 | 0.185257 | 0.00968  | 0 |
| chr1 | 2.05E+08 | 2.05E+08 | 1170 | 1151 | 2.05E+08 | 0.219584 | 0.002801 | 0 |
| chr1 | 2.05E+08 | 2.05E+08 | 1092 | 1100 | 2.05E+08 | 0.185432 | 0.009623 | 0 |
| chr1 | 2.06E+08 | 2.06E+08 | 970  | 974  | 2.06E+08 | 0.190026 | 0.00823  | 0 |
| chr1 | 2.06E+08 | 2.06E+08 | 977  | 958  | 2.06E+08 | 0.224296 | 0.002332 | 0 |
| chr1 | 2.06E+08 | 2.06E+08 | 1063 | 1060 | 2.06E+08 | 0.20004  | 0.005792 | 0 |
| chr1 | 2.06E+08 | 2.06E+08 | 5    | 3    | 2.06E+08 | 0.932929 | 8.75E-29 | 0 |
| chr1 | 2.06E+08 | 2.07E+08 | 5    | 5    | 2.06E+08 | 0.195963 | 0.006694 | 0 |
| chr1 | 2.07E+08 | 2.07E+08 | 1074 | 1071 | 2.07E+08 | 0.199999 | 0.0058   | 0 |
| chr1 | 2.07E+08 | 2.08E+08 | 993  | 998  | 2.08E+08 | 0.188717 | 0.008607 | 0 |
| chr1 | 2.08E+08 | 2.08E+08 | 590  | 772  | 2.08E+08 | -0.19192 | 0.008179 | 0 |
| chr1 | 2.12E+08 | 2.12E+08 | 927  | 910  | 2.12E+08 | 0.222666 | 0.002485 | 0 |
| chr1 | 2.17E+08 | 2.17E+08 | 683  | 897  | 2.17E+08 | -0.19726 | 0.006817 | 0 |
| chr1 | 2.19E+08 | 2.19E+08 | 699  | 939  | 2.19E+08 | -0.22987 | 0.002062 | 0 |
| chr1 | 2.2E+08  | 2.2E+08  | 881  | 885  | 2.2E+08  | 0.189428 | 0.0084   | 0 |
| chr1 | 2.22E+08 | 2.22E+08 | 736  | 960  | 2.22E+08 | -0.18737 | 0.009527 | 0 |
| chr1 | 2.23E+08 | 2.23E+08 | 704  | 965  | 2.23E+08 | -0.25899 | 0.000629 | 0 |
| chr1 | 2.24E+08 | 2.24E+08 | 34   | 49   | 2.24E+08 | -0.33128 | 2.05E-05 | 0 |
| chr1 | 2.28E+08 | 2.28E+08 | 1261 | 1181 | 2.28E+08 | 0.290522 | 0.000127 | 0 |
| chr1 | 2.28E+08 | 2.28E+08 | 1151 | 1146 | 2.28E+08 | 0.202244 | 0.005351 | 0 |
| chr1 | 2.28E+08 | 2.28E+08 | 1083 | 1089 | 2.28E+08 | 0.187992 | 0.008823 | 0 |
| chr1 | 2.29E+08 | 2.29E+08 | 1180 | 1161 | 2.29E+08 | 0.219382 | 0.002823 | 0 |

|      |          |          |      |      |          |          |          |   |
|------|----------|----------|------|------|----------|----------|----------|---|
| chr1 | 2.29E+08 | 2.3E+08  | 978  | 983  | 2.29E+08 | 0.188606 | 0.00864  | 0 |
| chr1 | 2.3E+08  | 2.3E+08  | 896  | 875  | 2.3E+08  | 0.230179 | 0.001847 | 0 |
| chr1 | 2.3E+08  | 2.3E+08  | 1092 | 1074 | 2.3E+08  | 0.219942 | 0.002762 | 0 |
| chr1 | 2.31E+08 | 2.31E+08 | 905  | 911  | 2.31E+08 | 0.18643  | 0.009304 | 0 |
| chr1 | 2.35E+08 | 2.35E+08 | 1121 | 1109 | 2.35E+08 | 0.21149  | 0.003809 | 0 |
| chr1 | 2.35E+08 | 2.35E+08 | 1055 | 1062 | 2.35E+08 | 0.186422 | 0.009306 | 0 |
| chr1 | 2.35E+08 | 2.36E+08 | 862  | 858  | 2.35E+08 | 0.202673 | 0.005268 | 0 |
| chr1 | 2.35E+08 | 2.36E+08 | 778  | 780  | 2.36E+08 | 0.192259 | 0.007619 | 0 |
| chr1 | 2.37E+08 | 2.37E+08 | 806  | 806  | 2.37E+08 | 0.195963 | 0.006694 | 0 |
| chr1 | 2.38E+08 | 2.38E+08 | 714  | 935  | 2.38E+08 | -0.19308 | 0.007865 | 0 |
| chr1 | 2.38E+08 | 2.38E+08 | 791  | 784  | 2.38E+08 | 0.208787 | 0.004212 | 0 |
| chr1 | 2.38E+08 | 2.38E+08 | 599  | 829  | 2.38E+08 | -0.27285 | 0.000344 | 0 |
| chr1 | 2.39E+08 | 2.39E+08 | 656  | 855  | 2.39E+08 | -0.18627 | 0.009881 | 0 |
| chr1 | 2.4E+08  | 2.4E+08  | 658  | 874  | 2.4E+08  | -0.21358 | 0.003814 | 0 |
| chr1 | 2.4E+08  | 2.41E+08 | 712  | 952  | 2.4E+08  | -0.22312 | 0.002672 | 0 |
| chr1 | 2.41E+08 | 2.41E+08 | 692  | 921  | 2.41E+08 | -0.21647 | 0.003429 | 0 |
| chr1 | 2.41E+08 | 2.41E+08 | 748  | 748  | 2.41E+08 | 0.195963 | 0.006694 | 0 |
| chr1 | 2.42E+08 | 2.42E+08 | 745  | 973  | 2.42E+08 | -0.18924 | 0.008952 | 0 |
| chr1 | 2.42E+08 | 2.43E+08 | 195  | 263  | 2.42E+08 | -0.23563 | 0.001646 | 0 |
| chr1 | 2.42E+08 | 2.43E+08 | 238  | 322  | 2.43E+08 | -0.24014 | 0.001375 | 0 |
| chr1 | 2.44E+08 | 2.44E+08 | 665  | 880  | 2.44E+08 | -0.20819 | 0.004639 | 0 |
| chr1 | 2.45E+08 | 2.45E+08 | 818  | 794  | 2.45E+08 | 0.238925 | 0.001294 | 0 |
| chr1 | 2.45E+08 | 2.45E+08 | 841  | 823  | 2.45E+08 | 0.227176 | 0.002081 | 0 |
| chr1 | 2.49E+08 | 2.49E+08 | 286  | 382  | 2.49E+08 | -0.22159 | 0.002831 | 0 |
| chr1 | 2.49E+08 | 2.49E+08 | 1023 | 1031 | 2.49E+08 | 0.184725 | 0.009855 | 0 |
| chr1 | 2.49E+08 | 2.49E+08 | 655  | 648  | 2.49E+08 | 0.211464 | 0.003813 | 0 |
| chr1 | 700001   | 800000   | 151  | 156  | 750000   | 0.148966 | 0.02998  | 0 |
| chr1 | 750001   | 850000   | 475  | 496  | 8.00E+05 | 0.13355  | 0.045844 | 0 |
| chr1 | 1900001  | 2000000  | 1087 | 1122 | 1950000  | 0.150242 | 0.028901 | 0 |
| chr1 | 2150001  | 2250000  | 1182 | 1196 | 2200000  | 0.178976 | 0.011929 | 0 |
| chr1 | 2200001  | 2300000  | 1190 | 1245 | 2250000  | 0.130779 | 0.049311 | 0 |
| chr1 | 2250001  | 2350000  | 1204 | 1217 | 2300000  | 0.180469 | 0.011356 | 0 |
| chr1 | 2700001  | 2800000  | 1227 | 1253 | 2750000  | 0.165712 | 0.018207 | 0 |
| chr1 | 2750001  | 2850000  | 1230 | 1283 | 2800000  | 0.1351   | 0.043993 | 0 |
| chr1 | 3000001  | 3100000  | 1216 | 1263 | 3050000  | 0.141252 | 0.037231 | 0 |
| chr1 | 3050001  | 3150000  | 1184 | 1209 | 3100000  | 0.165818 | 0.018147 | 0 |
| chr1 | 3650001  | 3750000  | 1077 | 1098 | 3700000  | 0.168103 | 0.016901 | 0 |
| chr1 | 3700001  | 3800000  | 994  | 1029 | 3750000  | 0.146038 | 0.03258  | 0 |
| chr1 | 4050001  | 4150000  | 966  | 997  | 4100000  | 0.150393 | 0.028776 | 0 |
| chr1 | 4700001  | 4800000  | 1041 | 1070 | 4750000  | 0.156322 | 0.024197 | 0 |
| chr1 | 4750001  | 4850000  | 1092 | 1117 | 4800000  | 0.163307 | 0.019606 | 0 |
| chr1 | 4850001  | 4950000  | 695  | 900  | 4900000  | -0.17695 | 0.013364 | 0 |
| chr1 | 6050001  | 6150000  | 1158 | 1206 | 6100000  | 0.137368 | 0.041392 | 0 |
| chr1 | 6150001  | 6250000  | 1198 | 1247 | 6200000  | 0.138129 | 0.040548 | 0 |
| chr1 | 6300001  | 6400000  | 1184 | 1203 | 6350000  | 0.172995 | 0.014478 | 0 |
| chr1 | 6350001  | 6450000  | 1036 | 1062 | 6400000  | 0.160203 | 0.021545 | 0 |
| chr1 | 6500001  | 6600000  | 1074 | 1091 | 6550000  | 0.173306 | 0.014335 | 0 |

|      |          |          |      |      |          |          |          |   |
|------|----------|----------|------|------|----------|----------|----------|---|
| chr1 | 6700001  | 6800000  | 953  | 988  | 6750000  | 0.143928 | 0.034568 | 0 |
| chr1 | 6750001  | 6850000  | 915  | 946  | 6800000  | 0.147895 | 0.03091  | 0 |
| chr1 | 8050001  | 8150000  | 1012 | 1042 | 8100000  | 0.153817 | 0.026051 | 0 |
| chr1 | 8100001  | 8200000  | 977  | 992  | 8150000  | 0.173981 | 0.014028 | 0 |
| chr1 | 8200001  | 8300000  | 945  | 969  | 8250000  | 0.159781 | 0.021822 | 0 |
| chr1 | 8250001  | 8350000  | 913  | 939  | 8300000  | 0.155453 | 0.024828 | 0 |
| chr1 | 8300001  | 8400000  | 902  | 935  | 8350000  | 0.144124 | 0.034379 | 0 |
| chr1 | 8400001  | 8500000  | 1086 | 1132 | 8450000  | 0.136113 | 0.042816 | 0 |
| chr1 | 9000001  | 9100000  | 1007 | 1039 | 9050000  | 0.150831 | 0.028414 | 0 |
| chr1 | 9350001  | 9450000  | 1121 | 1151 | 9400000  | 0.157861 | 0.023114 | 0 |
| chr1 | 9550001  | 9650000  | 796  | 815  | 9600000  | 0.161931 | 0.020446 | 0 |
| chr1 | 9600001  | 9700000  | 974  | 984  | 9650000  | 0.181226 | 0.011075 | 0 |
| chr1 | 9900001  | 10000000 | 988  | 1002 | 9950000  | 0.175663 | 0.013288 | 0 |
| chr1 | 10050001 | 10150000 | 801  | 824  | 10100000 | 0.155121 | 0.025072 | 0 |
| chr1 | 10100001 | 10200000 | 833  | 869  | 10150000 | 0.134923 | 0.044201 | 0 |
| chr1 | 10150001 | 10250000 | 825  | 846  | 10200000 | 0.159699 | 0.021875 | 0 |
| chr1 | 10350001 | 10450000 | 956  | 997  | 10400000 | 0.13538  | 0.043665 | 0 |
| chr1 | 10450001 | 10550000 | 844  | 873  | 10500000 | 0.147224 | 0.031505 | 0 |
| chr1 | 10750001 | 10850000 | 1200 | 1240 | 10800000 | 0.148657 | 0.030245 | 0 |
| chr1 | 11150001 | 11250000 | 869  | 879  | 11200000 | 0.179456 | 0.011742 | 0 |
| chr1 | 11250001 | 11350000 | 899  | 909  | 11300000 | 0.180004 | 0.011532 | 0 |
| chr1 | 11450001 | 11550000 | 1079 | 1098 | 11500000 | 0.17078  | 0.015536 | 0 |
| chr1 | 11500001 | 11600000 | 1184 | 1238 | 11550000 | 0.131621 | 0.048236 | 0 |
| chr1 | 11650001 | 11750000 | 1071 | 1080 | 11700000 | 0.18389  | 0.010135 | 0 |
| chr1 | 11750001 | 11850000 | 1079 | 1102 | 11800000 | 0.165534 | 0.018307 | 0 |
| chr1 | 11850001 | 11950000 | 1077 | 1116 | 11900000 | 0.144644 | 0.033882 | 0 |
| chr1 | 11900001 | 12000000 | 975  | 984  | 11950000 | 0.182707 | 0.010544 | 0 |
| chr1 | 12000001 | 12100000 | 1051 | 1061 | 12050000 | 0.182301 | 0.010687 | 0 |
| chr1 | 12100001 | 12200000 | 1011 | 1042 | 12150000 | 0.152391 | 0.027158 | 0 |
| chr1 | 12600001 | 12700000 | 1051 | 1088 | 12650000 | 0.146047 | 0.032572 | 0 |
| chr1 | 12700001 | 12800000 | 788  | 1009 | 12750000 | -0.1607  | 0.022013 | 0 |
| chr1 | 12900001 | 13000000 | 98   | 101  | 12950000 | 0.152461 | 0.027103 | 0 |
| chr1 | 14000001 | 14100000 | 879  | 893  | 14050000 | 0.173166 | 0.014399 | 0 |
| chr1 | 15650001 | 15750000 | 1441 | 1454 | 15700000 | 0.183006 | 0.010439 | 0 |
| chr1 | 15700001 | 15800000 | 1349 | 1398 | 15750000 | 0.144489 | 0.03403  | 0 |
| chr1 | 15750001 | 15850000 | 1259 | 1288 | 15800000 | 0.163109 | 0.019725 | 0 |
| chr1 | 15950001 | 16050000 | 993  | 1032 | 1.60E+07 | 0.140386 | 0.038128 | 0 |
| chr1 | 16000001 | 16100000 | 1058 | 1098 | 16050000 | 0.142425 | 0.036044 | 0 |
| chr1 | 16250001 | 16350000 | 1184 | 1197 | 16300000 | 0.180209 | 0.011454 | 0 |
| chr1 | 16300001 | 16400000 | 1044 | 1086 | 16350000 | 0.139061 | 0.039535 | 0 |
| chr1 | 16350001 | 16450000 | 980  | 1012 | 16400000 | 0.149607 | 0.029433 | 0 |
| chr1 | 16500001 | 16600000 | 1050 | 1082 | 16550000 | 0.152652 | 0.026953 | 0 |
| chr1 | 17050001 | 17150000 | 139  | 143  | 17100000 | 0.155033 | 0.025137 | 0 |
| chr1 | 17500001 | 17600000 | 1175 | 1209 | 17550000 | 0.15481  | 0.025303 | 0 |
| chr1 | 17750001 | 17850000 | 822  | 857  | 17800000 | 0.135806 | 0.04317  | 0 |
| chr1 | 18850001 | 18950000 | 1037 | 1076 | 18900000 | 0.142701 | 0.035769 | 0 |
| chr1 | 18900001 | 19000000 | 1074 | 1104 | 18950000 | 0.156217 | 0.024273 | 0 |

|      |          |          |      |      |          |          |          |   |
|------|----------|----------|------|------|----------|----------|----------|---|
| chr1 | 18950001 | 19050000 | 1086 | 1125 | 1.90E+07 | 0.145062 | 0.033487 | 0 |
| chr1 | 19200001 | 19300000 | 1138 | 1177 | 19250000 | 0.147349 | 0.031393 | 0 |
| chr1 | 19250001 | 19350000 | 1057 | 1095 | 19300000 | 0.145008 | 0.033539 | 0 |
| chr1 | 19300001 | 19400000 | 1058 | 1095 | 19350000 | 0.146372 | 0.032275 | 0 |
| chr1 | 19350001 | 19450000 | 1134 | 1163 | 19400000 | 0.159533 | 0.021985 | 0 |
| chr1 | 19450001 | 19550000 | 1052 | 1101 | 19500000 | 0.130283 | 0.049952 | 0 |
| chr1 | 19650001 | 19750000 | 1126 | 1151 | 19700000 | 0.164282 | 0.019028 | 0 |
| chr1 | 19700001 | 19800000 | 1088 | 1111 | 19750000 | 0.165783 | 0.018167 | 0 |
| chr1 | 19750001 | 19850000 | 994  | 1021 | 19800000 | 0.157298 | 0.023506 | 0 |
| chr1 | 19850001 | 19950000 | 862  | 894  | 19900000 | 0.143376 | 0.035104 | 0 |
| chr1 | 19900001 | 20000000 | 1019 | 1030 | 19950000 | 0.180473 | 0.011355 | 0 |
| chr1 | 20850001 | 20950000 | 978  | 1008 | 20900000 | 0.152374 | 0.027172 | 0 |
| chr1 | 21000001 | 21100000 | 1036 | 1072 | 21050000 | 0.146682 | 0.031992 | 0 |
| chr1 | 21300001 | 21400000 | 930  | 956  | 21350000 | 0.156183 | 0.024297 | 0 |
| chr1 | 21350001 | 21450000 | 873  | 905  | 21400000 | 0.144027 | 0.034472 | 0 |
| chr1 | 21450001 | 21550000 | 855  | 891  | 21500000 | 0.136462 | 0.042416 | 0 |
| chr1 | 21800001 | 21900000 | 877  | 911  | 21850000 | 0.141089 | 0.037399 | 0 |
| chr1 | 21850001 | 21950000 | 1105 | 1145 | 21900000 | 0.144662 | 0.033865 | 0 |
| chr1 | 21950001 | 22050000 | 1082 | 1116 | 2.20E+07 | 0.151327 | 0.02801  | 0 |
| chr1 | 22100001 | 22200000 | 951  | 991  | 22150000 | 0.136523 | 0.042346 | 0 |
| chr1 | 22150001 | 22250000 | 1187 | 1220 | 22200000 | 0.156402 | 0.02414  | 0 |
| chr1 | 23250001 | 23350000 | 851  | 885  | 23300000 | 0.139445 | 0.039123 | 0 |
| chr1 | 23450001 | 23550000 | 969  | 997  | 23500000 | 0.154866 | 0.025261 | 0 |
| chr1 | 23500001 | 23600000 | 951  | 991  | 23550000 | 0.136523 | 0.042346 | 0 |
| chr1 | 23800001 | 23900000 | 1009 | 1052 | 23850000 | 0.135755 | 0.043229 | 0 |
| chr1 | 24000001 | 24100000 | 933  | 952  | 24050000 | 0.166879 | 0.017559 | 0 |
| chr1 | 24050001 | 24150000 | 1015 | 1039 | 24100000 | 0.162247 | 0.020251 | 0 |
| chr1 | 24150001 | 24250000 | 800  | 822  | 24200000 | 0.156825 | 0.023839 | 0 |
| chr1 | 25400001 | 25500000 | 1022 | 1067 | 25450000 | 0.133798 | 0.045544 | 0 |
| chr1 | 25750001 | 25850000 | 846  | 875  | 25800000 | 0.147338 | 0.031403 | 0 |
| chr1 | 26050001 | 26150000 | 1140 | 1177 | 26100000 | 0.149883 | 0.029201 | 0 |
| chr1 | 26150001 | 26250000 | 1030 | 1051 | 26200000 | 0.166845 | 0.017578 | 0 |
| chr1 | 26350001 | 26450000 | 954  | 994  | 26400000 | 0.136706 | 0.042138 | 0 |
| chr1 | 26400001 | 26500000 | 921  | 931  | 26450000 | 0.180383 | 0.011389 | 0 |
| chr1 | 26500001 | 26600000 | 959  | 980  | 26550000 | 0.164712 | 0.018777 | 0 |
| chr1 | 26650001 | 26750000 | 1009 | 1019 | 26700000 | 0.181735 | 0.01089  | 0 |
| chr1 | 26700001 | 26800000 | 943  | 974  | 26750000 | 0.149299 | 0.029695 | 0 |
| chr1 | 27150001 | 27250000 | 1046 | 1078 | 27200000 | 0.152489 | 0.027081 | 0 |
| chr1 | 27200001 | 27300000 | 959  | 988  | 27250000 | 0.152983 | 0.026694 | 0 |
| chr1 | 27350001 | 27450000 | 935  | 977  | 27400000 | 0.132571 | 0.047046 | 0 |
| chr1 | 27650001 | 27750000 | 1141 | 1164 | 27700000 | 0.167171 | 0.0174   | 0 |
| chr1 | 27750001 | 27850000 | 885  | 924  | 27800000 | 0.133748 | 0.045605 | 0 |
| chr1 | 28150001 | 28250000 | 878  | 894  | 28200000 | 0.169909 | 0.015969 | 0 |
| chr1 | 28250001 | 28350000 | 951  | 991  | 28300000 | 0.136523 | 0.042346 | 0 |
| chr1 | 28850001 | 28950000 | 808  | 843  | 28900000 | 0.134786 | 0.044363 | 0 |
| chr1 | 29400001 | 29500000 | 916  | 934  | 29450000 | 0.167888 | 0.017015 | 0 |
| chr1 | 29450001 | 29550000 | 935  | 948  | 29500000 | 0.176042 | 0.013126 | 0 |

|      |          |          |      |      |          |          |          |   |
|------|----------|----------|------|------|----------|----------|----------|---|
| chr1 | 29500001 | 29600000 | 1028 | 1070 | 29550000 | 0.138193 | 0.040479 | 0 |
| chr1 | 29800001 | 29900000 | 844  | 882  | 29850000 | 0.132427 | 0.047225 | 0 |
| chr1 | 31250001 | 31350000 | 1127 | 1157 | 31300000 | 0.158062 | 0.022976 | 0 |
| chr1 | 31500001 | 31600000 | 835  | 867  | 31550000 | 0.141707 | 0.036766 | 0 |
| chr1 | 31800001 | 31900000 | 1034 | 1072 | 31850000 | 0.143894 | 0.0346   | 0 |
| chr1 | 31850001 | 31950000 | 965  | 1008 | 31900000 | 0.133068 | 0.046433 | 0 |
| chr1 | 32200001 | 32300000 | 1181 | 1217 | 32250000 | 0.152643 | 0.02696  | 0 |
| chr1 | 32350001 | 32450000 | 901  | 916  | 32400000 | 0.172143 | 0.014878 | 0 |
| chr1 | 32450001 | 32550000 | 935  | 947  | 32500000 | 0.177565 | 0.012492 | 0 |
| chr1 | 32600001 | 32700000 | 1040 | 1053 | 32650000 | 0.178041 | 0.012299 | 0 |
| chr1 | 32900001 | 33000000 | 812  | 832  | 32950000 | 0.160859 | 0.021122 | 0 |
| chr1 | 33350001 | 33450000 | 1005 | 1020 | 33400000 | 0.174589 | 0.013756 | 0 |
| chr1 | 33750001 | 33850000 | 1103 | 1132 | 33800000 | 0.158522 | 0.022662 | 0 |
| chr1 | 33800001 | 33900000 | 1056 | 1102 | 33850000 | 0.134449 | 0.044764 | 0 |
| chr1 | 35550001 | 35650000 | 633  | 646  | 35600000 | 0.166634 | 0.017693 | 0 |
| chr1 | 35600001 | 35700000 | 712  | 729  | 35650000 | 0.161921 | 0.020452 | 0 |
| chr1 | 35650001 | 35750000 | 796  | 819  | 35700000 | 0.154868 | 0.025259 | 0 |
| chr1 | 35700001 | 35800000 | 819  | 848  | 35750000 | 0.145762 | 0.032834 | 0 |
| chr1 | 36000001 | 36100000 | 1034 | 1065 | 36050000 | 0.153346 | 0.026413 | 0 |
| chr1 | 36200001 | 36300000 | 901  | 919  | 36250000 | 0.167425 | 0.017263 | 0 |
| chr1 | 36700001 | 36800000 | 916  | 951  | 36750000 | 0.141865 | 0.036606 | 0 |
| chr1 | 37100001 | 37200000 | 1064 | 1091 | 37150000 | 0.15981  | 0.021802 | 0 |
| chr1 | 37150001 | 37250000 | 1032 | 1076 | 37200000 | 0.135728 | 0.04326  | 0 |
| chr1 | 38050001 | 38150000 | 1111 | 1154 | 38100000 | 0.141179 | 0.037306 | 0 |
| chr1 | 38650001 | 38750000 | 1076 | 1124 | 38700000 | 0.132999 | 0.046518 | 0 |
| chr1 | 38800001 | 38900000 | 798  | 1002 | 38850000 | -0.13246 | 0.048214 | 0 |
| chr1 | 38850001 | 38950000 | 784  | 990  | 38900000 | -0.14061 | 0.038864 | 0 |
| chr1 | 39000001 | 39100000 | 956  | 998  | 39050000 | 0.133934 | 0.04538  | 0 |
| chr1 | 39150001 | 39250000 | 909  | 943  | 39200000 | 0.142986 | 0.035487 | 0 |
| chr1 | 39450001 | 39550000 | 774  | 786  | 39500000 | 0.173767 | 0.014125 | 0 |
| chr1 | 39950001 | 40050000 | 745  | 778  | 4.00E+07 | 0.133433 | 0.045987 | 0 |
| chr1 | 40000001 | 40100000 | 897  | 905  | 40050000 | 0.183153 | 0.010388 | 0 |
| chr1 | 40100001 | 40200000 | 1056 | 1095 | 40150000 | 0.143642 | 0.034845 | 0 |
| chr1 | 40150001 | 40250000 | 875  | 910  | 40200000 | 0.13938  | 0.039193 | 0 |
| chr1 | 40200001 | 40300000 | 847  | 860  | 40250000 | 0.173988 | 0.014025 | 0 |
| chr1 | 40350001 | 40450000 | 948  | 988  | 40400000 | 0.136339 | 0.042557 | 0 |
| chr1 | 40400001 | 40500000 | 883  | 917  | 40450000 | 0.141455 | 0.037023 | 0 |
| chr1 | 40600001 | 40700000 | 948  | 956  | 40650000 | 0.183839 | 0.010152 | 0 |
| chr1 | 40900001 | 41000000 | 875  | 901  | 40950000 | 0.153719 | 0.026126 | 0 |
| chr1 | 40950001 | 41050000 | 742  | 761  | 4.10E+07 | 0.159486 | 0.022016 | 0 |
| chr1 | 41450001 | 41550000 | 1064 | 1099 | 41500000 | 0.14927  | 0.02972  | 0 |
| chr1 | 41750001 | 41850000 | 1200 | 1211 | 41800000 | 0.182799 | 0.010511 | 0 |
| chr1 | 41850001 | 41950000 | 1284 | 1311 | 41900000 | 0.165941 | 0.018078 | 0 |
| chr1 | 43100001 | 43200000 | 900  | 941  | 43150000 | 0.131693 | 0.048145 | 0 |
| chr1 | 43150001 | 43250000 | 973  | 1006 | 43200000 | 0.147844 | 0.030954 | 0 |
| chr1 | 43300001 | 43400000 | 969  | 994  | 43350000 | 0.159214 | 0.022197 | 0 |
| chr1 | 43350001 | 43450000 | 1032 | 1042 | 43400000 | 0.182051 | 0.010777 | 0 |

|      |          |          |      |      |          |          |          |   |
|------|----------|----------|------|------|----------|----------|----------|---|
| chr1 | 43400001 | 43500000 | 971  | 1013 | 43450000 | 0.134872 | 0.044261 | 0 |
| chr1 | 43950001 | 44050000 | 1198 | 1233 | 4.40E+07 | 0.154418 | 0.025596 | 0 |
| chr1 | 44100001 | 44200000 | 1004 | 1019 | 44150000 | 0.174568 | 0.013766 | 0 |
| chr1 | 44800001 | 44900000 | 1113 | 1145 | 44850000 | 0.155069 | 0.02511  | 0 |
| chr1 | 44850001 | 44950000 | 971  | 1015 | 44900000 | 0.132027 | 0.047725 | 0 |
| chr1 | 45250001 | 45350000 | 997  | 1021 | 45300000 | 0.161646 | 0.020625 | 0 |
| chr1 | 45900001 | 46000000 | 798  | 816  | 45950000 | 0.163783 | 0.019322 | 0 |
| chr1 | 46650001 | 46750000 | 1016 | 1030 | 46700000 | 0.176219 | 0.013051 | 0 |
| chr1 | 46700001 | 46800000 | 930  | 957  | 46750000 | 0.154675 | 0.025403 | 0 |
| chr1 | 46900001 | 47000000 | 1188 | 1205 | 46950000 | 0.175465 | 0.013373 | 0 |
| chr1 | 47200001 | 47300000 | 791  | 825  | 47250000 | 0.135247 | 0.043821 | 0 |
| chr1 | 47500001 | 47600000 | 358  | 454  | 47550000 | -0.14677 | 0.032833 | 0 |
| chr1 | 47550001 | 47650000 | 393  | 504  | 47600000 | -0.16293 | 0.020596 | 0 |
| chr1 | 48400001 | 48500000 | 1034 | 1060 | 48450000 | 0.160135 | 0.02159  | 0 |
| chr1 | 48450001 | 48550000 | 1054 | 1098 | 48500000 | 0.13696  | 0.041851 | 0 |
| chr1 | 48700001 | 48800000 | 655  | 844  | 48750000 | -0.16979 | 0.016724 | 0 |
| chr1 | 49750001 | 49850000 | 606  | 780  | 49800000 | -0.16819 | 0.017563 | 0 |
| chr1 | 49950001 | 50050000 | 550  | 694  | 5.00E+07 | -0.13954 | 0.04     | 0 |
| chr1 | 50050001 | 50150000 | 560  | 725  | 50100000 | -0.17659 | 0.013516 | 0 |
| chr1 | 50250001 | 50350000 | 556  | 723  | 50300000 | -0.18295 | 0.011017 | 0 |
| chr1 | 51500001 | 51600000 | 763  | 961  | 51550000 | -0.13689 | 0.042929 | 0 |
| chr1 | 51550001 | 51650000 | 718  | 913  | 51600000 | -0.15067 | 0.029433 | 0 |
| chr1 | 51650001 | 51750000 | 820  | 846  | 51700000 | 0.150929 | 0.028334 | 0 |
| chr1 | 51700001 | 51800000 | 987  | 1011 | 51750000 | 0.161302 | 0.020841 | 0 |
| chr1 | 51750001 | 51850000 | 974  | 1007 | 51800000 | 0.147893 | 0.030912 | 0 |
| chr1 | 52500001 | 52600000 | 779  | 810  | 52550000 | 0.139664 | 0.038889 | 0 |
| chr1 | 52900001 | 53000000 | 898  | 923  | 52950000 | 0.156348 | 0.024179 | 0 |
| chr1 | 53150001 | 53250000 | 820  | 829  | 53200000 | 0.180215 | 0.011452 | 0 |
| chr1 | 53200001 | 53300000 | 791  | 814  | 53250000 | 0.154612 | 0.02545  | 0 |
| chr1 | 53700001 | 53800000 | 1246 | 1276 | 53750000 | 0.161639 | 0.020629 | 0 |
| chr1 | 54350001 | 54450000 | 1014 | 1046 | 54400000 | 0.151138 | 0.028163 | 0 |
| chr1 | 54600001 | 54700000 | 1064 | 1109 | 54650000 | 0.136202 | 0.042714 | 0 |
| chr1 | 54650001 | 54750000 | 1114 | 1143 | 54700000 | 0.158887 | 0.022416 | 0 |
| chr1 | 54700001 | 54800000 | 1121 | 1139 | 54750000 | 0.172982 | 0.014485 | 0 |
| chr1 | 54800001 | 54900000 | 1084 | 1107 | 54850000 | 0.165673 | 0.018229 | 0 |
| chr1 | 55150001 | 55250000 | 1046 | 1058 | 55200000 | 0.179506 | 0.011722 | 0 |
| chr1 | 55200001 | 55300000 | 1075 | 1094 | 55250000 | 0.170687 | 0.015581 | 0 |
| chr1 | 56550001 | 56650000 | 703  | 884  | 56600000 | -0.13456 | 0.045648 | 0 |
| chr1 | 56750001 | 56850000 | 690  | 866  | 56800000 | -0.13181 | 0.049033 | 0 |
| chr1 | 57250001 | 57350000 | 815  | 1024 | 57300000 | -0.13338 | 0.047073 | 0 |
| chr1 | 57350001 | 57450000 | 746  | 947  | 57400000 | -0.14823 | 0.031527 | 0 |
| chr1 | 57550001 | 57650000 | 706  | 896  | 57600000 | -0.14787 | 0.031844 | 0 |
| chr1 | 57600001 | 57700000 | 719  | 912  | 57650000 | -0.14708 | 0.032552 | 0 |
| chr1 | 57900001 | 58000000 | 692  | 894  | 57950000 | -0.17354 | 0.014882 | 0 |
| chr1 | 57950001 | 58050000 | 644  | 829  | 5.80E+07 | -0.16835 | 0.017479 | 0 |
| chr1 | 58250001 | 58350000 | 719  | 912  | 58300000 | -0.14708 | 0.032552 | 0 |
| chr1 | 58300001 | 58400000 | 681  | 884  | 58350000 | -0.18043 | 0.011955 | 0 |

|      |          |          |     |      |          |          |          |   |
|------|----------|----------|-----|------|----------|----------|----------|---|
| chr1 | 58550001 | 58650000 | 640 | 817  | 58600000 | -0.1563  | 0.025043 | 0 |
| chr1 | 58750001 | 58850000 | 678 | 851  | 58800000 | -0.13191 | 0.048902 | 0 |
| chr1 | 60000001 | 60100000 | 605 | 768  | 60050000 | -0.14821 | 0.031543 | 0 |
| chr1 | 60550001 | 60650000 | 689 | 884  | 60600000 | -0.16358 | 0.0202   | 0 |
| chr1 | 60600001 | 60700000 | 655 | 834  | 60650000 | -0.15259 | 0.027868 | 0 |
| chr1 | 60800001 | 60900000 | 657 | 834  | 60850000 | -0.14819 | 0.031558 | 0 |
| chr1 | 60900001 | 61000000 | 566 | 710  | 60950000 | -0.13105 | 0.049994 | 0 |
| chr1 | 60950001 | 61050000 | 658 | 837  | 6.10E+07 | -0.15118 | 0.029012 | 0 |
| chr1 | 61300001 | 61400000 | 766 | 965  | 61350000 | -0.13722 | 0.042554 | 0 |
| chr1 | 61350001 | 61450000 | 784 | 997  | 61400000 | -0.15078 | 0.029342 | 0 |
| chr1 | 61750001 | 61850000 | 836 | 1051 | 61800000 | -0.13422 | 0.046048 | 0 |
| chr1 | 62000001 | 62100000 | 692 | 870  | 62050000 | -0.13428 | 0.045981 | 0 |
| chr1 | 62050001 | 62150000 | 759 | 974  | 62100000 | -0.16386 | 0.020031 | 0 |
| chr1 | 62700001 | 62800000 | 968 | 999  | 62750000 | 0.150485 | 0.028699 | 0 |
| chr1 | 62850001 | 62950000 | 865 | 897  | 62900000 | 0.143555 | 0.034929 | 0 |
| chr1 | 63350001 | 63450000 | 816 | 1025 | 63400000 | -0.13302 | 0.047517 | 0 |
| chr1 | 64400001 | 64500000 | 802 | 1013 | 64450000 | -0.141   | 0.038462 | 0 |
| chr1 | 64650001 | 64750000 | 705 | 890  | 64700000 | -0.14022 | 0.039277 | 0 |
| chr1 | 65450001 | 65550000 | 964 | 1003 | 65500000 | 0.138746 | 0.039875 | 0 |
| chr1 | 65600001 | 65700000 | 860 | 900  | 65650000 | 0.130375 | 0.049834 | 0 |
| chr1 | 65900001 | 66000000 | 686 | 863  | 65950000 | -0.13519 | 0.0449   | 0 |
| chr1 | 66250001 | 66350000 | 705 | 895  | 66300000 | -0.1483  | 0.03146  | 0 |
| chr1 | 66550001 | 66650000 | 770 | 990  | 66600000 | -0.16661 | 0.018434 | 0 |
| chr1 | 66950001 | 67050000 | 903 | 914  | 6.70E+07 | 0.178495 | 0.012118 | 0 |
| chr1 | 67850001 | 67950000 | 836 | 865  | 67900000 | 0.146766 | 0.031917 | 0 |
| chr1 | 68650001 | 68750000 | 806 | 827  | 68700000 | 0.158856 | 0.022437 | 0 |
| chr1 | 69000001 | 69100000 | 670 | 866  | 69050000 | -0.17424 | 0.014557 | 0 |
| chr1 | 69300001 | 69400000 | 634 | 652  | 69350000 | 0.155574 | 0.024739 | 0 |
| chr1 | 69500001 | 69600000 | 577 | 735  | 69550000 | -0.15321 | 0.027378 | 0 |
| chr1 | 69600001 | 69700000 | 671 | 869  | 69650000 | -0.17708 | 0.013308 | 0 |
| chr1 | 70300001 | 70400000 | 599 | 755  | 70350000 | -0.13796 | 0.041729 | 0 |
| chr1 | 70600001 | 70700000 | 909 | 919  | 70650000 | 0.180178 | 0.011466 | 0 |
| chr1 | 70650001 | 70750000 | 904 | 912  | 70700000 | 0.183252 | 0.010354 | 0 |
| chr1 | 71100001 | 71200000 | 745 | 936  | 71150000 | -0.13331 | 0.047166 | 0 |
| chr1 | 71200001 | 71300000 | 642 | 811  | 71250000 | -0.14117 | 0.038287 | 0 |
| chr1 | 71450001 | 71550000 | 756 | 969  | 71500000 | -0.16215 | 0.021084 | 0 |
| chr1 | 71500001 | 71600000 | 722 | 925  | 71550000 | -0.16149 | 0.0215   | 0 |
| chr1 | 71600001 | 71700000 | 614 | 790  | 71650000 | -0.16765 | 0.017856 | 0 |
| chr1 | 72300001 | 72400000 | 591 | 744  | 72350000 | -0.13618 | 0.043741 | 0 |
| chr1 | 72800001 | 72900000 | 532 | 689  | 72850000 | -0.17711 | 0.013293 | 0 |
| chr1 | 72850001 | 72950000 | 575 | 736  | 72900000 | -0.16018 | 0.022351 | 0 |
| chr1 | 72900001 | 73000000 | 636 | 815  | 72950000 | -0.16181 | 0.021297 | 0 |
| chr1 | 72950001 | 73050000 | 617 | 779  | 7.30E+07 | -0.14039 | 0.039097 | 0 |
| chr1 | 73250001 | 73350000 | 573 | 732  | 73300000 | -0.15735 | 0.024293 | 0 |
| chr1 | 73600001 | 73700000 | 685 | 876  | 73650000 | -0.15886 | 0.023236 | 0 |
| chr1 | 73850001 | 73950000 | 566 | 721  | 73900000 | -0.15323 | 0.027359 | 0 |
| chr1 | 74150001 | 74250000 | 595 | 760  | 74200000 | -0.15715 | 0.024434 | 0 |

|      |          |          |     |      |          |          |          |   |
|------|----------|----------|-----|------|----------|----------|----------|---|
| chr1 | 74400001 | 74500000 | 626 | 786  | 74450000 | -0.1324  | 0.048283 | 0 |
| chr1 | 74500001 | 74600000 | 557 | 709  | 74550000 | -0.15215 | 0.028224 | 0 |
| chr1 | 74850001 | 74950000 | 646 | 823  | 74900000 | -0.1534  | 0.027233 | 0 |
| chr1 | 75250001 | 75350000 | 621 | 791  | 75300000 | -0.15312 | 0.027448 | 0 |
| chr1 | 75400001 | 75500000 | 622 | 794  | 75450000 | -0.15626 | 0.025072 | 0 |
| chr1 | 75550001 | 75650000 | 652 | 831  | 75600000 | -0.15401 | 0.026754 | 0 |
| chr1 | 76350001 | 76450000 | 689 | 873  | 76400000 | -0.14551 | 0.033995 | 0 |
| chr1 | 76650001 | 76750000 | 690 | 879  | 76700000 | -0.1533  | 0.027305 | 0 |
| chr1 | 76850001 | 76950000 | 663 | 846  | 76900000 | -0.15569 | 0.025494 | 0 |
| chr1 | 77350001 | 77450000 | 596 | 750  | 77400000 | -0.13562 | 0.044399 | 0 |
| chr1 | 78000001 | 78100000 | 872 | 1107 | 78050000 | -0.14829 | 0.031469 | 0 |
| chr1 | 78400001 | 78500000 | 884 | 893  | 78450000 | 0.181349 | 0.01103  | 0 |
| chr1 | 79250001 | 79350000 | 552 | 701  | 79300000 | -0.14878 | 0.031039 | 0 |
| chr1 | 79300001 | 79400000 | 532 | 678  | 79350000 | -0.1539  | 0.026845 | 0 |
| chr1 | 79500001 | 79600000 | 617 | 802  | 79550000 | -0.18237 | 0.011227 | 0 |
| chr1 | 79700001 | 79800000 | 619 | 789  | 79750000 | -0.15412 | 0.02667  | 0 |
| chr1 | 80100001 | 80200000 | 529 | 688  | 80150000 | -0.18318 | 0.010935 | 0 |
| chr1 | 80200001 | 80300000 | 619 | 787  | 80250000 | -0.15046 | 0.029606 | 0 |
| chr1 | 80250001 | 80350000 | 615 | 783  | 80300000 | -0.15246 | 0.027969 | 0 |
| chr1 | 81050001 | 81150000 | 598 | 769  | 81100000 | -0.16688 | 0.018284 | 0 |
| chr1 | 81100001 | 81200000 | 577 | 744  | 81150000 | -0.17077 | 0.016224 | 0 |
| chr1 | 81150001 | 81250000 | 588 | 751  | 81200000 | -0.15703 | 0.024515 | 0 |
| chr1 | 81550001 | 81650000 | 619 | 781  | 81600000 | -0.13942 | 0.04013  | 0 |
| chr1 | 81750001 | 81850000 | 610 | 780  | 81800000 | -0.1587  | 0.023347 | 0 |
| chr1 | 81850001 | 81950000 | 609 | 780  | 81900000 | -0.16107 | 0.021771 | 0 |
| chr1 | 82050001 | 82150000 | 607 | 790  | 82100000 | -0.18419 | 0.010578 | 0 |
| chr1 | 82300001 | 82400000 | 608 | 763  | 82350000 | -0.13165 | 0.049234 | 0 |
| chr1 | 82750001 | 82850000 | 590 | 748  | 82800000 | -0.14636 | 0.033209 | 0 |
| chr1 | 83000001 | 83100000 | 627 | 806  | 83050000 | -0.16635 | 0.018578 | 0 |
| chr1 | 83050001 | 83150000 | 603 | 758  | 83100000 | -0.13408 | 0.046227 | 0 |
| chr1 | 83150001 | 83250000 | 607 | 785  | 83200000 | -0.17503 | 0.014199 | 0 |
| chr1 | 83200001 | 83300000 | 628 | 802  | 83250000 | -0.15687 | 0.024628 | 0 |
| chr1 | 83300001 | 83400000 | 629 | 795  | 83350000 | -0.14193 | 0.0375   | 0 |
| chr1 | 83550001 | 83650000 | 360 | 469  | 83600000 | -0.18563 | 0.010091 | 0 |
| chr1 | 83850001 | 83950000 | 60  | 77   | 83900000 | -0.16393 | 0.019986 | 0 |
| chr1 | 83900001 | 84000000 | 319 | 403  | 83950000 | -0.14126 | 0.038189 | 0 |
| chr1 | 83950001 | 84050000 | 618 | 784  | 8.40E+07 | -0.14728 | 0.032367 | 0 |
| chr1 | 84350001 | 84450000 | 692 | 873  | 84400000 | -0.13925 | 0.040317 | 0 |
| chr1 | 84600001 | 84700000 | 639 | 803  | 84650000 | -0.13362 | 0.04678  | 0 |
| chr1 | 86500001 | 86600000 | 646 | 812  | 86550000 | -0.13398 | 0.046341 | 0 |
| chr1 | 87000001 | 87100000 | 644 | 825  | 87050000 | -0.16137 | 0.021577 | 0 |
| chr1 | 87050001 | 87150000 | 518 | 666  | 87100000 | -0.16661 | 0.018434 | 0 |
| chr1 | 87950001 | 88050000 | 612 | 795  | 8.80E+07 | -0.18146 | 0.011563 | 0 |
| chr1 | 88000001 | 88100000 | 667 | 860  | 88050000 | -0.17069 | 0.016265 | 0 |
| chr1 | 88050001 | 88150000 | 671 | 864  | 88100000 | -0.16876 | 0.017262 | 0 |
| chr1 | 88350001 | 88450000 | 697 | 883  | 88400000 | -0.14529 | 0.034205 | 0 |
| chr1 | 88550001 | 88650000 | 692 | 882  | 88600000 | -0.15404 | 0.026731 | 0 |



|      |          |          |      |      |          |          |          |   |
|------|----------|----------|------|------|----------|----------|----------|---|
| chr1 | 90250001 | 90350000 | 1026 | 1064 | 90300000 | 0.143496 | 0.034987 | 0 |
| chr1 | 90700001 | 90800000 | 728  | 917  | 90750000 | -0.13702 | 0.042782 | 0 |
| chr1 | 90750001 | 90850000 | 766  | 977  | 90800000 | -0.15505 | 0.025966 | 0 |
| chr1 | 91050001 | 91150000 | 695  | 878  | 91100000 | -0.14124 | 0.038205 | 0 |
| chr1 | 91400001 | 91500000 | 818  | 848  | 91450000 | 0.144    | 0.034499 | 0 |
| chr1 | 91900001 | 92000000 | 730  | 916  | 91950000 | -0.13149 | 0.049439 | 0 |
| chr1 | 91950001 | 92050000 | 862  | 1086 | 9.20E+07 | -0.1373  | 0.042464 | 0 |
| chr1 | 92250001 | 92350000 | 913  | 942  | 92300000 | 0.150851 | 0.028398 | 0 |
| chr1 | 92450001 | 92550000 | 697  | 875  | 92500000 | -0.13216 | 0.048587 | 0 |
| chr1 | 93350001 | 93450000 | 863  | 889  | 93400000 | 0.15314  | 0.026572 | 0 |
| chr1 | 93550001 | 93650000 | 922  | 947  | 93600000 | 0.157365 | 0.023459 | 0 |
| chr1 | 94100001 | 94200000 | 1157 | 1196 | 94150000 | 0.148135 | 0.0307   | 0 |
| chr1 | 94250001 | 94350000 | 922  | 937  | 94300000 | 0.172681 | 0.014624 | 0 |
| chr1 | 94500001 | 94600000 | 936  | 1185 | 94550000 | -0.14434 | 0.03511  | 0 |
| chr1 | 96250001 | 96350000 | 659  | 829  | 96300000 | -0.13513 | 0.044968 | 0 |
| chr1 | 96300001 | 96400000 | 670  | 852  | 96350000 | -0.15073 | 0.029382 | 0 |
| chr1 | 96450001 | 96550000 | 640  | 817  | 96500000 | -0.1563  | 0.025043 | 0 |
| chr1 | 96750001 | 96850000 | 612  | 781  | 96800000 | -0.15583 | 0.025389 | 0 |
| chr1 | 97400001 | 97500000 | 718  | 935  | 97450000 | -0.18502 | 0.010295 | 0 |
| chr1 | 98000001 | 98100000 | 709  | 895  | 98050000 | -0.14014 | 0.039362 | 0 |
| chr1 | 98100001 | 98200000 | 717  | 911  | 98150000 | -0.14951 | 0.030407 | 0 |
| chr1 | 98150001 | 98250000 | 754  | 948  | 98200000 | -0.13436 | 0.045886 | 0 |
| chr1 | 98450001 | 98550000 | 744  | 955  | 98500000 | -0.16424 | 0.019805 | 0 |
| chr1 | 98650001 | 98750000 | 701  | 895  | 98700000 | -0.15651 | 0.024891 | 0 |
| chr1 | 98700001 | 98800000 | 697  | 880  | 98750000 | -0.14038 | 0.039106 | 0 |
| chr1 | 99500001 | 99600000 | 628  | 793  | 99550000 | -0.14059 | 0.038883 | 0 |
| chr1 | 99550001 | 99650000 | 636  | 828  | 99600000 | -0.18464 | 0.010424 | 0 |
| chr1 | 99750001 | 99850000 | 652  | 827  | 99800000 | -0.14705 | 0.032576 | 0 |
| chr1 | 99850001 | 99950000 | 692  | 890  | 99900000 | -0.16707 | 0.018176 | 0 |
| chr1 | 1E+08    | 1E+08    | 719  | 911  | 1E+08    | -0.1455  | 0.034012 | 0 |
| chr1 | 1E+08    | 1E+08    | 713  | 897  | 1E+08    | -0.13524 | 0.044836 | 0 |
| chr1 | 1.01E+08 | 1.01E+08 | 688  | 878  | 1.01E+08 | -0.15585 | 0.025373 | 0 |
| chr1 | 1.01E+08 | 1.01E+08 | 651  | 835  | 1.01E+08 | -0.16316 | 0.020458 | 0 |
| chr1 | 1.02E+08 | 1.02E+08 | 608  | 775  | 1.02E+08 | -0.15416 | 0.02664  | 0 |
| chr1 | 1.02E+08 | 1.02E+08 | 609  | 779  | 1.02E+08 | -0.15922 | 0.022995 | 0 |
| chr1 | 1.02E+08 | 1.02E+08 | 638  | 821  | 1.02E+08 | -0.16786 | 0.017741 | 0 |
| chr1 | 1.03E+08 | 1.03E+08 | 627  | 810  | 1.03E+08 | -0.17349 | 0.014903 | 0 |
| chr1 | 1.03E+08 | 1.03E+08 | 547  | 694  | 1.03E+08 | -0.14743 | 0.032234 | 0 |
| chr1 | 1.03E+08 | 1.03E+08 | 508  | 643  | 1.03E+08 | -0.14403 | 0.035416 | 0 |
| chr1 | 1.03E+08 | 1.03E+08 | 581  | 743  | 1.03E+08 | -0.15886 | 0.023238 | 0 |
| chr1 | 1.03E+08 | 1.03E+08 | 580  | 730  | 1.03E+08 | -0.13588 | 0.04409  | 0 |
| chr1 | 1.04E+08 | 1.04E+08 | 562  | 729  | 1.04E+08 | -0.17939 | 0.012363 | 0 |
| chr1 | 1.04E+08 | 1.04E+08 | 594  | 771  | 1.04E+08 | -0.1803  | 0.012002 | 0 |
| chr1 | 1.04E+08 | 1.04E+08 | 263  | 332  | 1.04E+08 | -0.14016 | 0.039343 | 0 |
| chr1 | 1.04E+08 | 1.04E+08 | 534  | 687  | 1.04E+08 | -0.16751 | 0.017935 | 0 |
| chr1 | 1.04E+08 | 1.04E+08 | 550  | 712  | 1.04E+08 | -0.17648 | 0.013563 | 0 |
| chr1 | 1.04E+08 | 1.05E+08 | 567  | 714  | 1.04E+08 | -0.13661 | 0.043246 | 0 |

|      |          |          |      |      |          |          |          |   |
|------|----------|----------|------|------|----------|----------|----------|---|
| chr1 | 1.04E+08 | 1.05E+08 | 612  | 769  | 1.05E+08 | -0.13349 | 0.046941 | 0 |
| chr1 | 1.05E+08 | 1.05E+08 | 596  | 762  | 1.05E+08 | -0.15852 | 0.023475 | 0 |
| chr1 | 1.05E+08 | 1.05E+08 | 580  | 728  | 1.05E+08 | -0.13192 | 0.048887 | 0 |
| chr1 | 1.05E+08 | 1.05E+08 | 640  | 666  | 1.05E+08 | 0.138513 | 0.040129 | 0 |
| chr1 | 1.05E+08 | 1.05E+08 | 508  | 650  | 1.05E+08 | -0.15965 | 0.022706 | 0 |
| chr1 | 1.05E+08 | 1.05E+08 | 571  | 730  | 1.05E+08 | -0.15844 | 0.023525 | 0 |
| chr1 | 1.05E+08 | 1.06E+08 | 513  | 652  | 1.05E+08 | -0.14995 | 0.030036 | 0 |
| chr1 | 1.05E+08 | 1.06E+08 | 541  | 702  | 1.06E+08 | -0.17988 | 0.012168 | 0 |
| chr1 | 1.06E+08 | 1.06E+08 | 601  | 768  | 1.06E+08 | -0.15778 | 0.023987 | 0 |
| chr1 | 1.06E+08 | 1.06E+08 | 583  | 756  | 1.06E+08 | -0.17893 | 0.012546 | 0 |
| chr1 | 1.06E+08 | 1.06E+08 | 555  | 716  | 1.06E+08 | -0.17151 | 0.015855 | 0 |
| chr1 | 1.06E+08 | 1.06E+08 | 563  | 708  | 1.06E+08 | -0.13465 | 0.045537 | 0 |
| chr1 | 1.06E+08 | 1.06E+08 | 581  | 749  | 1.06E+08 | -0.17046 | 0.016377 | 0 |
| chr1 | 1.07E+08 | 1.07E+08 | 600  | 756  | 1.07E+08 | -0.13746 | 0.042285 | 0 |
| chr1 | 1.07E+08 | 1.07E+08 | 555  | 713  | 1.07E+08 | -0.16545 | 0.019092 | 0 |
| chr1 | 1.07E+08 | 1.07E+08 | 602  | 764  | 1.07E+08 | -0.14785 | 0.031863 | 0 |
| chr1 | 1.07E+08 | 1.07E+08 | 582  | 744  | 1.07E+08 | -0.15832 | 0.02361  | 0 |
| chr1 | 1.08E+08 | 1.08E+08 | 779  | 1012 | 1.08E+08 | -0.18155 | 0.011529 | 0 |
| chr1 | 1.08E+08 | 1.08E+08 | 725  | 923  | 1.08E+08 | -0.15239 | 0.02803  | 0 |
| chr1 | 1.09E+08 | 1.09E+08 | 154  | 200  | 1.09E+08 | -0.18111 | 0.011696 | 0 |
| chr1 | 1.1E+08  | 1.1E+08  | 858  | 878  | 1.1E+08  | 0.16272  | 0.019961 | 0 |
| chr1 | 1.1E+08  | 1.1E+08  | 1037 | 1081 | 1.1E+08  | 0.136012 | 0.042932 | 0 |
| chr1 | 1.1E+08  | 1.1E+08  | 1031 | 1062 | 1.1E+08  | 0.153224 | 0.026507 | 0 |
| chr1 | 1.1E+08  | 1.11E+08 | 1057 | 1103 | 1.11E+08 | 0.134506 | 0.044696 | 0 |
| chr1 | 1.11E+08 | 1.11E+08 | 1101 | 1134 | 1.11E+08 | 0.153357 | 0.026404 | 0 |
| chr1 | 1.11E+08 | 1.12E+08 | 712  | 925  | 1.12E+08 | -0.18161 | 0.011505 | 0 |
| chr1 | 1.13E+08 | 1.13E+08 | 678  | 859  | 1.13E+08 | -0.14541 | 0.034094 | 0 |
| chr1 | 1.13E+08 | 1.13E+08 | 857  | 887  | 1.13E+08 | 0.146324 | 0.032318 | 0 |
| chr1 | 1.13E+08 | 1.13E+08 | 996  | 1029 | 1.13E+08 | 0.148938 | 0.030004 | 0 |
| chr1 | 1.15E+08 | 1.15E+08 | 776  | 1005 | 1.15E+08 | -0.1771  | 0.013298 | 0 |
| chr1 | 1.15E+08 | 1.15E+08 | 862  | 1085 | 1.15E+08 | -0.13597 | 0.043983 | 0 |
| chr1 | 1.15E+08 | 1.16E+08 | 627  | 798  | 1.16E+08 | -0.15196 | 0.028373 | 0 |
| chr1 | 1.16E+08 | 1.16E+08 | 905  | 936  | 1.16E+08 | 0.147372 | 0.031373 | 0 |
| chr1 | 1.16E+08 | 1.16E+08 | 726  | 923  | 1.16E+08 | -0.1504  | 0.029659 | 0 |
| chr1 | 1.17E+08 | 1.17E+08 | 961  | 1005 | 1.17E+08 | 0.131376 | 0.048547 | 0 |
| chr1 | 1.17E+08 | 1.17E+08 | 737  | 933  | 1.17E+08 | -0.14425 | 0.035201 | 0 |
| chr1 | 1.19E+08 | 1.19E+08 | 735  | 930  | 1.19E+08 | -0.14352 | 0.035908 | 0 |
| chr1 | 1.19E+08 | 1.19E+08 | 673  | 846  | 1.19E+08 | -0.13409 | 0.046213 | 0 |
| chr1 | 1.19E+08 | 1.19E+08 | 678  | 851  | 1.19E+08 | -0.13191 | 0.048902 | 0 |
| chr1 | 1.19E+08 | 1.19E+08 | 658  | 851  | 1.19E+08 | -0.17511 | 0.014166 | 0 |
| chr1 | 1.19E+08 | 1.19E+08 | 542  | 685  | 1.19E+08 | -0.14185 | 0.037585 | 0 |
| chr1 | 1.19E+08 | 1.19E+08 | 502  | 646  | 1.19E+08 | -0.16788 | 0.01773  | 0 |
| chr1 | 1.19E+08 | 1.19E+08 | 571  | 728  | 1.19E+08 | -0.15448 | 0.026394 | 0 |
| chr1 | 1.19E+08 | 1.19E+08 | 611  | 772  | 1.19E+08 | -0.14147 | 0.037977 | 0 |
| chr1 | 1.2E+08  | 1.2E+08  | 706  | 907  | 1.2E+08  | -0.16547 | 0.01908  | 0 |
| chr1 | 1.2E+08  | 1.2E+08  | 655  | 852  | 1.2E+08  | -0.1834  | 0.010857 | 0 |
| chr1 | 1.21E+08 | 1.21E+08 | 60   | 76   | 1.21E+08 | -0.14507 | 0.034411 | 0 |

|      |          |          |      |      |          |          |          |   |
|------|----------|----------|------|------|----------|----------|----------|---|
| chr1 | 1.21E+08 | 1.21E+08 | 289  | 363  | 1.21E+08 | -0.13294 | 0.047619 | 0 |
| chr1 | 1.21E+08 | 1.21E+08 | 343  | 441  | 1.21E+08 | -0.16661 | 0.018434 | 0 |
| chr1 | 1.21E+08 | 1.22E+08 | 1389 | 1436 | 1.21E+08 | 0.147954 | 0.030858 | 0 |
| chr1 | 1.21E+08 | 1.22E+08 | 1380 | 1434 | 1.22E+08 | 0.140586 | 0.037919 | 0 |
| chr1 | 1.45E+08 | 1.45E+08 | 469  | 605  | 1.45E+08 | -0.17138 | 0.015917 | 0 |
| chr1 | 1.45E+08 | 1.45E+08 | 644  | 660  | 1.45E+08 | 0.160558 | 0.021316 | 0 |
| chr1 | 1.46E+08 | 1.46E+08 | 883  | 924  | 1.46E+08 | 0.130484 | 0.049692 | 0 |
| chr1 | 1.46E+08 | 1.46E+08 | 29   | 37   | 1.46E+08 | -0.15551 | 0.025624 | 0 |
| chr1 | 1.46E+08 | 1.47E+08 | 251  | 325  | 1.47E+08 | -0.17679 | 0.013432 | 0 |
| chr1 | 1.47E+08 | 1.47E+08 | 815  | 834  | 1.47E+08 | 0.162716 | 0.019963 | 0 |
| chr1 | 1.49E+08 | 1.49E+08 | 147  | 188  | 1.49E+08 | -0.15895 | 0.023175 | 0 |
| chr1 | 1.49E+08 | 1.49E+08 | 55   | 70   | 1.49E+08 | -0.15196 | 0.028373 | 0 |
| chr1 | 1.49E+08 | 1.49E+08 | 23   | 24   | 1.49E+08 | 0.134562 | 0.044628 | 0 |
| chr1 | 1.5E+08  | 1.5E+08  | 48   | 49   | 1.5E+08  | 0.166216 | 0.017925 | 0 |
| chr1 | 1.5E+08  | 1.5E+08  | 107  | 108  | 1.5E+08  | 0.182543 | 0.010602 | 0 |
| chr1 | 1.5E+08  | 1.5E+08  | 923  | 933  | 1.5E+08  | 0.180417 | 0.011376 | 0 |
| chr1 | 1.5E+08  | 1.5E+08  | 944  | 952  | 1.5E+08  | 0.183788 | 0.010169 | 0 |
| chr1 | 1.5E+08  | 1.5E+08  | 903  | 941  | 1.5E+08  | 0.136494 | 0.042379 | 0 |
| chr1 | 1.5E+08  | 1.5E+08  | 882  | 900  | 1.5E+08  | 0.166817 | 0.017593 | 0 |
| chr1 | 1.5E+08  | 1.5E+08  | 784  | 813  | 1.5E+08  | 0.143561 | 0.034923 | 0 |
| chr1 | 1.51E+08 | 1.51E+08 | 860  | 867  | 1.51E+08 | 0.184268 | 0.010007 | 0 |
| chr1 | 1.51E+08 | 1.51E+08 | 846  | 878  | 1.51E+08 | 0.1424   | 0.036069 | 0 |
| chr1 | 1.51E+08 | 1.51E+08 | 1002 | 1041 | 1.51E+08 | 0.140875 | 0.037619 | 0 |
| chr1 | 1.51E+08 | 1.51E+08 | 1042 | 1057 | 1.51E+08 | 0.175343 | 0.013426 | 0 |
| chr1 | 1.51E+08 | 1.51E+08 | 975  | 1019 | 1.51E+08 | 0.132283 | 0.047404 | 0 |
| chr1 | 1.51E+08 | 1.51E+08 | 995  | 1038 | 1.51E+08 | 0.134925 | 0.044199 | 0 |
| chr1 | 1.51E+08 | 1.52E+08 | 975  | 997  | 1.52E+08 | 0.163772 | 0.019328 | 0 |
| chr1 | 1.52E+08 | 1.52E+08 | 1026 | 1048 | 1.52E+08 | 0.165355 | 0.018409 | 0 |
| chr1 | 1.53E+08 | 1.53E+08 | 749  | 944  | 1.53E+08 | -0.13786 | 0.04184  | 0 |
| chr1 | 1.53E+08 | 1.53E+08 | 699  | 881  | 1.53E+08 | -0.13789 | 0.041808 | 0 |
| chr1 | 1.54E+08 | 1.54E+08 | 943  | 961  | 1.54E+08 | 0.168684 | 0.016596 | 0 |
| chr1 | 1.54E+08 | 1.54E+08 | 867  | 906  | 1.54E+08 | 0.132484 | 0.047154 | 0 |
| chr1 | 1.55E+08 | 1.55E+08 | 1072 | 1099 | 1.55E+08 | 0.160077 | 0.021628 | 0 |
| chr1 | 1.55E+08 | 1.55E+08 | 941  | 974  | 1.55E+08 | 0.146236 | 0.032399 | 0 |
| chr1 | 1.55E+08 | 1.55E+08 | 1045 | 1087 | 1.55E+08 | 0.139114 | 0.039477 | 0 |
| chr1 | 1.55E+08 | 1.55E+08 | 990  | 1014 | 1.55E+08 | 0.161406 | 0.020775 | 0 |
| chr1 | 1.55E+08 | 1.55E+08 | 784  | 803  | 1.55E+08 | 0.161417 | 0.020768 | 0 |
| chr1 | 1.56E+08 | 1.56E+08 | 705  | 728  | 1.56E+08 | 0.149648 | 0.029399 | 0 |
| chr1 | 1.56E+08 | 1.56E+08 | 756  | 785  | 1.56E+08 | 0.141657 | 0.036818 | 0 |
| chr1 | 1.56E+08 | 1.56E+08 | 975  | 999  | 1.56E+08 | 0.160881 | 0.021109 | 0 |
| chr1 | 1.56E+08 | 1.56E+08 | 957  | 967  | 1.56E+08 | 0.180966 | 0.011171 | 0 |
| chr1 | 1.56E+08 | 1.56E+08 | 1073 | 1115 | 1.56E+08 | 0.140569 | 0.037937 | 0 |
| chr1 | 1.56E+08 | 1.56E+08 | 948  | 976  | 1.56E+08 | 0.153969 | 0.025935 | 0 |
| chr1 | 1.56E+08 | 1.56E+08 | 1138 | 1190 | 1.56E+08 | 0.131502 | 0.048387 | 0 |
| chr1 | 1.56E+08 | 1.57E+08 | 1152 | 1168 | 1.56E+08 | 0.176063 | 0.013117 | 0 |
| chr1 | 1.57E+08 | 1.57E+08 | 1049 | 1069 | 1.57E+08 | 0.168716 | 0.01658  | 0 |
| chr1 | 1.57E+08 | 1.57E+08 | 556  | 709  | 1.57E+08 | -0.15474 | 0.026202 | 0 |

|      |          |          |      |      |          |          |          |   |
|------|----------|----------|------|------|----------|----------|----------|---|
| chr1 | 1.58E+08 | 1.58E+08 | 721  | 928  | 1.58E+08 | -0.16816 | 0.017579 | 0 |
| chr1 | 1.58E+08 | 1.58E+08 | 709  | 922  | 1.58E+08 | -0.18302 | 0.010992 | 0 |
| chr1 | 1.58E+08 | 1.58E+08 | 774  | 972  | 1.58E+08 | -0.13266 | 0.047963 | 0 |
| chr1 | 1.58E+08 | 1.58E+08 | 1058 | 1105 | 1.58E+08 | 0.133256 | 0.046202 | 0 |
| chr1 | 1.58E+08 | 1.58E+08 | 609  | 768  | 1.58E+08 | -0.1387  | 0.04091  | 0 |
| chr1 | 1.59E+08 | 1.59E+08 | 652  | 838  | 1.59E+08 | -0.16612 | 0.018711 | 0 |
| chr1 | 1.59E+08 | 1.59E+08 | 667  | 869  | 1.59E+08 | -0.18571 | 0.010065 | 0 |
| chr1 | 1.59E+08 | 1.59E+08 | 595  | 769  | 1.59E+08 | -0.17413 | 0.014608 | 0 |
| chr1 | 1.59E+08 | 1.59E+08 | 800  | 1015 | 1.59E+08 | -0.14744 | 0.032222 | 0 |
| chr1 | 1.61E+08 | 1.61E+08 | 884  | 915  | 1.61E+08 | 0.146238 | 0.032397 | 0 |
| chr1 | 1.61E+08 | 1.61E+08 | 868  | 887  | 1.61E+08 | 0.164724 | 0.018771 | 0 |
| chr1 | 1.61E+08 | 1.62E+08 | 451  | 455  | 1.61E+08 | 0.183224 | 0.010363 | 0 |
| chr1 | 1.63E+08 | 1.63E+08 | 1037 | 1068 | 1.63E+08 | 0.153467 | 0.026319 | 0 |
| chr1 | 1.63E+08 | 1.63E+08 | 1064 | 1074 | 1.63E+08 | 0.182467 | 0.010628 | 0 |
| chr1 | 1.63E+08 | 1.63E+08 | 969  | 1010 | 1.63E+08 | 0.136176 | 0.042743 | 0 |
| chr1 | 1.64E+08 | 1.64E+08 | 679  | 863  | 1.64E+08 | -0.14999 | 0.030006 | 0 |
| chr1 | 1.64E+08 | 1.64E+08 | 699  | 889  | 1.64E+08 | -0.15093 | 0.029217 | 0 |
| chr1 | 1.64E+08 | 1.64E+08 | 612  | 782  | 1.64E+08 | -0.15767 | 0.024061 | 0 |
| chr1 | 1.64E+08 | 1.64E+08 | 614  | 800  | 1.64E+08 | -0.1858  | 0.010034 | 0 |
| chr1 | 1.64E+08 | 1.65E+08 | 702  | 899  | 1.64E+08 | -0.16089 | 0.021889 | 0 |
| chr1 | 1.65E+08 | 1.65E+08 | 921  | 955  | 1.65E+08 | 0.143663 | 0.034824 | 0 |
| chr1 | 1.66E+08 | 1.66E+08 | 987  | 1023 | 1.66E+08 | 0.144279 | 0.03423  | 0 |
| chr1 | 1.66E+08 | 1.66E+08 | 975  | 1006 | 1.66E+08 | 0.150807 | 0.028434 | 0 |
| chr1 | 1.66E+08 | 1.66E+08 | 628  | 800  | 1.66E+08 | -0.15327 | 0.027329 | 0 |
| chr1 | 1.66E+08 | 1.66E+08 | 601  | 764  | 1.66E+08 | -0.15024 | 0.029787 | 0 |
| chr1 | 1.67E+08 | 1.67E+08 | 933  | 974  | 1.67E+08 | 0.133918 | 0.045399 | 0 |
| chr1 | 1.69E+08 | 1.69E+08 | 731  | 930  | 1.69E+08 | -0.1514  | 0.028832 | 0 |
| chr1 | 1.69E+08 | 1.69E+08 | 725  | 937  | 1.69E+08 | -0.17411 | 0.01462  | 0 |
| chr1 | 1.69E+08 | 1.69E+08 | 672  | 845  | 1.69E+08 | -0.13453 | 0.045686 | 0 |
| chr1 | 1.69E+08 | 1.69E+08 | 852  | 861  | 1.69E+08 | 0.180803 | 0.011232 | 0 |
| chr1 | 1.69E+08 | 1.69E+08 | 896  | 920  | 1.69E+08 | 0.157828 | 0.023137 | 0 |
| chr1 | 1.69E+08 | 1.69E+08 | 781  | 993  | 1.69E+08 | -0.15051 | 0.029566 | 0 |
| chr1 | 1.69E+08 | 1.69E+08 | 641  | 807  | 1.69E+08 | -0.13628 | 0.043626 | 0 |
| chr1 | 1.7E+08  | 1.7E+08  | 702  | 896  | 1.7E+08  | -0.15606 | 0.025215 | 0 |
| chr1 | 1.7E+08  | 1.7E+08  | 870  | 910  | 1.7E+08  | 0.131112 | 0.048884 | 0 |
| chr1 | 1.7E+08  | 1.7E+08  | 741  | 945  | 1.7E+08  | -0.15488 | 0.026096 | 0 |
| chr1 | 1.7E+08  | 1.7E+08  | 650  | 837  | 1.7E+08  | -0.16882 | 0.017226 | 0 |
| chr1 | 1.7E+08  | 1.7E+08  | 668  | 851  | 1.7E+08  | -0.15335 | 0.02727  | 0 |
| chr1 | 1.71E+08 | 1.71E+08 | 663  | 840  | 1.71E+08 | -0.14542 | 0.034087 | 0 |
| chr1 | 1.71E+08 | 1.71E+08 | 660  | 847  | 1.71E+08 | -0.16393 | 0.019986 | 0 |
| chr1 | 1.71E+08 | 1.71E+08 | 622  | 784  | 1.71E+08 | -0.13798 | 0.041709 | 0 |
| chr1 | 1.71E+08 | 1.71E+08 | 671  | 844  | 1.71E+08 | -0.13497 | 0.045162 | 0 |
| chr1 | 1.71E+08 | 1.71E+08 | 603  | 768  | 1.71E+08 | -0.15299 | 0.027555 | 0 |
| chr1 | 1.71E+08 | 1.72E+08 | 807  | 832  | 1.71E+08 | 0.151948 | 0.02751  | 0 |
| chr1 | 1.72E+08 | 1.72E+08 | 944  | 965  | 1.72E+08 | 0.164221 | 0.019063 | 0 |
| chr1 | 1.72E+08 | 1.72E+08 | 915  | 951  | 1.72E+08 | 0.140289 | 0.038229 | 0 |
| chr1 | 1.72E+08 | 1.72E+08 | 607  | 769  | 1.72E+08 | -0.14532 | 0.034175 | 0 |

|      |          |          |     |      |          |          |          |   |
|------|----------|----------|-----|------|----------|----------|----------|---|
| chr1 | 1.72E+08 | 1.72E+08 | 661 | 844  | 1.72E+08 | -0.15663 | 0.024805 | 0 |
| chr1 | 1.72E+08 | 1.72E+08 | 964 | 1000 | 1.72E+08 | 0.143068 | 0.035406 | 0 |
| chr1 | 1.73E+08 | 1.73E+08 | 752 | 946  | 1.73E+08 | -0.13514 | 0.044952 | 0 |
| chr1 | 1.73E+08 | 1.73E+08 | 696 | 898  | 1.73E+08 | -0.17167 | 0.015778 | 0 |
| chr1 | 1.73E+08 | 1.74E+08 | 701 | 892  | 1.74E+08 | -0.15167 | 0.028611 | 0 |
| chr1 | 1.74E+08 | 1.74E+08 | 675 | 858  | 1.74E+08 | -0.15013 | 0.029887 | 0 |
| chr1 | 1.74E+08 | 1.74E+08 | 638 | 817  | 1.74E+08 | -0.16082 | 0.021935 | 0 |
| chr1 | 1.74E+08 | 1.74E+08 | 711 | 893  | 1.74E+08 | -0.13285 | 0.04773  | 0 |
| chr1 | 1.74E+08 | 1.74E+08 | 658 | 833  | 1.74E+08 | -0.14427 | 0.035185 | 0 |
| chr1 | 1.74E+08 | 1.74E+08 | 652 | 838  | 1.74E+08 | -0.16612 | 0.018711 | 0 |
| chr1 | 1.74E+08 | 1.75E+08 | 699 | 880  | 1.74E+08 | -0.13625 | 0.043665 | 0 |
| chr1 | 1.75E+08 | 1.75E+08 | 473 | 598  | 1.75E+08 | -0.14234 | 0.037084 | 0 |
| chr1 | 1.75E+08 | 1.75E+08 | 604 | 778  | 1.75E+08 | -0.16926 | 0.016998 | 0 |
| chr1 | 1.75E+08 | 1.76E+08 | 701 | 907  | 1.75E+08 | -0.17573 | 0.013892 | 0 |
| chr1 | 1.76E+08 | 1.76E+08 | 805 | 1031 | 1.76E+08 | -0.16102 | 0.021802 | 0 |
| chr1 | 1.76E+08 | 1.76E+08 | 578 | 728  | 1.76E+08 | -0.13691 | 0.042911 | 0 |
| chr1 | 1.76E+08 | 1.77E+08 | 745 | 937  | 1.77E+08 | -0.13485 | 0.045306 | 0 |
| chr1 | 1.77E+08 | 1.77E+08 | 712 | 907  | 1.77E+08 | -0.15326 | 0.027337 | 0 |
| chr1 | 1.77E+08 | 1.77E+08 | 598 | 774  | 1.77E+08 | -0.17623 | 0.013674 | 0 |
| chr1 | 1.77E+08 | 1.77E+08 | 627 | 812  | 1.77E+08 | -0.17705 | 0.01332  | 0 |
| chr1 | 1.77E+08 | 1.77E+08 | 679 | 865  | 1.77E+08 | -0.15333 | 0.027288 | 0 |
| chr1 | 1.77E+08 | 1.78E+08 | 616 | 802  | 1.78E+08 | -0.18471 | 0.0104   | 0 |
| chr1 | 1.78E+08 | 1.78E+08 | 595 | 772  | 1.78E+08 | -0.17975 | 0.012219 | 0 |
| chr1 | 1.78E+08 | 1.78E+08 | 674 | 875  | 1.78E+08 | -0.18057 | 0.0119   | 0 |
| chr1 | 1.78E+08 | 1.78E+08 | 700 | 891  | 1.78E+08 | -0.15211 | 0.028254 | 0 |
| chr1 | 1.78E+08 | 1.78E+08 | 828 | 863  | 1.78E+08 | 0.136233 | 0.042678 | 0 |
| chr1 | 1.79E+08 | 1.79E+08 | 591 | 767  | 1.79E+08 | -0.18011 | 0.01208  | 0 |
| chr1 | 1.8E+08  | 1.8E+08  | 925 | 948  | 1.8E+08  | 0.160529 | 0.021334 | 0 |
| chr1 | 1.8E+08  | 1.81E+08 | 960 | 986  | 1.81E+08 | 0.15741  | 0.023428 | 0 |
| chr1 | 1.82E+08 | 1.83E+08 | 767 | 980  | 1.83E+08 | -0.15759 | 0.024118 | 0 |
| chr1 | 1.83E+08 | 1.83E+08 | 871 | 903  | 1.83E+08 | 0.14391  | 0.034585 | 0 |
| chr1 | 1.84E+08 | 1.85E+08 | 733 | 946  | 1.84E+08 | -0.17206 | 0.015584 | 0 |
| chr1 | 1.85E+08 | 1.85E+08 | 818 | 853  | 1.85E+08 | 0.135518 | 0.043504 | 0 |
| chr1 | 1.85E+08 | 1.86E+08 | 724 | 920  | 1.86E+08 | -0.14968 | 0.030265 | 0 |
| chr1 | 1.86E+08 | 1.86E+08 | 673 | 857  | 1.86E+08 | -0.15273 | 0.02776  | 0 |
| chr1 | 1.86E+08 | 1.86E+08 | 702 | 884  | 1.86E+08 | -0.13661 | 0.043246 | 0 |
| chr1 | 1.86E+08 | 1.86E+08 | 714 | 912  | 1.86E+08 | -0.15715 | 0.024434 | 0 |
| chr1 | 1.86E+08 | 1.86E+08 | 884 | 909  | 1.86E+08 | 0.155729 | 0.024626 | 0 |
| chr1 | 1.86E+08 | 1.87E+08 | 718 | 903  | 1.87E+08 | -0.13478 | 0.045385 | 0 |
| chr1 | 1.87E+08 | 1.87E+08 | 651 | 826  | 1.87E+08 | -0.14752 | 0.032154 | 0 |
| chr1 | 1.88E+08 | 1.88E+08 | 710 | 904  | 1.88E+08 | -0.15254 | 0.027907 | 0 |
| chr1 | 1.88E+08 | 1.88E+08 | 618 | 796  | 1.88E+08 | -0.1692  | 0.017029 | 0 |
| chr1 | 1.9E+08  | 1.9E+08  | 673 | 873  | 1.9E+08  | -0.17941 | 0.012352 | 0 |
| chr1 | 1.9E+08  | 1.9E+08  | 663 | 847  | 1.9E+08  | -0.15739 | 0.024261 | 0 |
| chr1 | 1.9E+08  | 1.9E+08  | 649 | 815  | 1.9E+08  | -0.13262 | 0.048015 | 0 |
| chr1 | 1.9E+08  | 1.91E+08 | 634 | 819  | 1.9E+08  | -0.17342 | 0.014939 | 0 |
| chr1 | 1.9E+08  | 1.91E+08 | 630 | 818  | 1.91E+08 | -0.18079 | 0.011817 | 0 |

|      |          |          |      |      |          |          |          |   |
|------|----------|----------|------|------|----------|----------|----------|---|
| chr1 | 1.91E+08 | 1.91E+08 | 605  | 775  | 1.91E+08 | -0.1613  | 0.021623 | 0 |
| chr1 | 1.91E+08 | 1.91E+08 | 647  | 825  | 1.91E+08 | -0.15467 | 0.026257 | 0 |
| chr1 | 1.91E+08 | 1.91E+08 | 645  | 810  | 1.91E+08 | -0.13266 | 0.047963 | 0 |
| chr1 | 1.91E+08 | 1.91E+08 | 616  | 790  | 1.91E+08 | -0.16296 | 0.020578 | 0 |
| chr1 | 1.91E+08 | 1.91E+08 | 581  | 740  | 1.91E+08 | -0.15302 | 0.027524 | 0 |
| chr1 | 1.91E+08 | 1.92E+08 | 581  | 755  | 1.91E+08 | -0.18198 | 0.011371 | 0 |
| chr1 | 1.92E+08 | 1.92E+08 | 663  | 857  | 1.92E+08 | -0.17432 | 0.01452  | 0 |
| chr1 | 1.92E+08 | 1.92E+08 | 660  | 830  | 1.92E+08 | -0.13468 | 0.0455   | 0 |
| chr1 | 1.92E+08 | 1.92E+08 | 661  | 839  | 1.92E+08 | -0.14806 | 0.031676 | 0 |
| chr1 | 1.93E+08 | 1.93E+08 | 766  | 975  | 1.93E+08 | -0.15209 | 0.028264 | 0 |
| chr1 | 1.93E+08 | 1.93E+08 | 780  | 979  | 1.93E+08 | -0.13187 | 0.048952 | 0 |
| chr1 | 1.94E+08 | 1.94E+08 | 706  | 905  | 1.94E+08 | -0.16229 | 0.020996 | 0 |
| chr1 | 1.94E+08 | 1.94E+08 | 627  | 799  | 1.94E+08 | -0.15377 | 0.026944 | 0 |
| chr1 | 1.94E+08 | 1.94E+08 | 646  | 820  | 1.94E+08 | -0.14813 | 0.031615 | 0 |
| chr1 | 1.94E+08 | 1.94E+08 | 643  | 834  | 1.94E+08 | -0.17927 | 0.01241  | 0 |
| chr1 | 1.94E+08 | 1.94E+08 | 569  | 736  | 1.94E+08 | -0.17531 | 0.014074 | 0 |
| chr1 | 1.95E+08 | 1.95E+08 | 623  | 807  | 1.95E+08 | -0.17737 | 0.013184 | 0 |
| chr1 | 1.95E+08 | 1.95E+08 | 601  | 775  | 1.95E+08 | -0.17087 | 0.016173 | 0 |
| chr1 | 1.95E+08 | 1.95E+08 | 633  | 817  | 1.95E+08 | -0.17217 | 0.015534 | 0 |
| chr1 | 1.95E+08 | 1.95E+08 | 616  | 785  | 1.95E+08 | -0.1538  | 0.026919 | 0 |
| chr1 | 1.97E+08 | 1.97E+08 | 643  | 828  | 1.97E+08 | -0.16885 | 0.017213 | 0 |
| chr1 | 1.97E+08 | 1.97E+08 | 383  | 494  | 1.97E+08 | -0.1712  | 0.016006 | 0 |
| chr1 | 1.97E+08 | 1.97E+08 | 935  | 955  | 1.97E+08 | 0.165429 | 0.018367 | 0 |
| chr1 | 1.98E+08 | 1.98E+08 | 808  | 1021 | 1.98E+08 | -0.14159 | 0.037847 | 0 |
| chr1 | 1.98E+08 | 1.98E+08 | 718  | 923  | 1.98E+08 | -0.16638 | 0.018559 | 0 |
| chr1 | 1.98E+08 | 1.98E+08 | 740  | 937  | 1.98E+08 | -0.14456 | 0.034901 | 0 |
| chr1 | 1.98E+08 | 1.99E+08 | 738  | 930  | 1.98E+08 | -0.13765 | 0.042076 | 0 |
| chr1 | 1.99E+08 | 1.99E+08 | 674  | 863  | 1.99E+08 | -0.16065 | 0.022044 | 0 |
| chr1 | 1.99E+08 | 1.99E+08 | 686  | 864  | 1.99E+08 | -0.13686 | 0.042964 | 0 |
| chr1 | 1.99E+08 | 1.99E+08 | 637  | 800  | 1.99E+08 | -0.13274 | 0.047859 | 0 |
| chr1 | 1.99E+08 | 1.99E+08 | 709  | 894  | 1.99E+08 | -0.13853 | 0.041101 | 0 |
| chr1 | 1.99E+08 | 2E+08    | 637  | 813  | 1.99E+08 | -0.156   | 0.025263 | 0 |
| chr1 | 2E+08    | 2E+08    | 718  | 911  | 2E+08    | -0.1475  | 0.032169 | 0 |
| chr1 | 2.02E+08 | 2.02E+08 | 1105 | 1151 | 2.02E+08 | 0.137122 | 0.041669 | 0 |
| chr1 | 2.03E+08 | 2.03E+08 | 906  | 933  | 2.03E+08 | 0.153597 | 0.026219 | 0 |
| chr1 | 2.03E+08 | 2.03E+08 | 923  | 952  | 2.03E+08 | 0.151332 | 0.028006 | 0 |
| chr1 | 2.03E+08 | 2.03E+08 | 960  | 989  | 2.03E+08 | 0.153027 | 0.02666  | 0 |
| chr1 | 2.03E+08 | 2.03E+08 | 985  | 1009 | 2.03E+08 | 0.161232 | 0.020885 | 0 |
| chr1 | 2.03E+08 | 2.04E+08 | 1088 | 1105 | 2.04E+08 | 0.173595 | 0.014203 | 0 |
| chr1 | 2.04E+08 | 2.04E+08 | 809  | 1043 | 2.04E+08 | -0.17056 | 0.016326 | 0 |
| chr1 | 2.05E+08 | 2.06E+08 | 1089 | 1137 | 2.06E+08 | 0.133735 | 0.045621 | 0 |
| chr1 | 2.06E+08 | 2.06E+08 | 11   | 14   | 2.06E+08 | -0.15196 | 0.028373 | 0 |
| chr1 | 2.06E+08 | 2.06E+08 | 551  | 564  | 2.06E+08 | 0.16232  | 0.020205 | 0 |
| chr1 | 2.06E+08 | 2.06E+08 | 338  | 349  | 2.06E+08 | 0.149759 | 0.029305 | 0 |
| chr1 | 2.07E+08 | 2.07E+08 | 186  | 191  | 2.07E+08 | 0.157693 | 0.023231 | 0 |
| chr1 | 2.07E+08 | 2.07E+08 | 1110 | 1127 | 2.07E+08 | 0.174035 | 0.014004 | 0 |
| chr1 | 2.07E+08 | 2.07E+08 | 1042 | 1081 | 2.07E+08 | 0.142952 | 0.035521 | 0 |

|      |          |          |      |      |          |          |          |   |
|------|----------|----------|------|------|----------|----------|----------|---|
| chr1 | 2.07E+08 | 2.07E+08 | 1068 | 1091 | 2.07E+08 | 0.165224 | 0.018484 | 0 |
| chr1 | 2.07E+08 | 2.08E+08 | 955  | 982  | 2.07E+08 | 0.155741 | 0.024617 | 0 |
| chr1 | 2.09E+08 | 2.09E+08 | 687  | 866  | 2.09E+08 | -0.13809 | 0.041578 | 0 |
| chr1 | 2.1E+08  | 2.1E+08  | 752  | 958  | 2.1E+08  | -0.15333 | 0.027284 | 0 |
| chr1 | 2.1E+08  | 2.1E+08  | 690  | 872  | 2.1E+08  | -0.14177 | 0.037666 | 0 |
| chr1 | 2.11E+08 | 2.11E+08 | 756  | 976  | 2.11E+08 | -0.17253 | 0.015358 | 0 |
| chr1 | 2.11E+08 | 2.11E+08 | 560  | 707  | 2.11E+08 | -0.14032 | 0.03917  | 0 |
| chr1 | 2.11E+08 | 2.11E+08 | 659  | 850  | 2.11E+08 | -0.17122 | 0.015997 | 0 |
| chr1 | 2.12E+08 | 2.12E+08 | 878  | 903  | 2.12E+08 | 0.155458 | 0.024824 | 0 |
| chr1 | 2.12E+08 | 2.12E+08 | 928  | 958  | 2.12E+08 | 0.150062 | 0.029051 | 0 |
| chr1 | 2.12E+08 | 2.12E+08 | 962  | 972  | 2.12E+08 | 0.181044 | 0.011143 | 0 |
| chr1 | 2.13E+08 | 2.13E+08 | 1030 | 1062 | 2.13E+08 | 0.151824 | 0.02761  | 0 |
| chr1 | 2.14E+08 | 2.14E+08 | 729  | 916  | 2.14E+08 | -0.13347 | 0.046969 | 0 |
| chr1 | 2.14E+08 | 2.14E+08 | 801  | 1035 | 2.14E+08 | -0.17379 | 0.014764 | 0 |
| chr1 | 2.14E+08 | 2.14E+08 | 779  | 1015 | 2.14E+08 | -0.18582 | 0.010027 | 0 |
| chr1 | 2.14E+08 | 2.14E+08 | 776  | 976  | 2.14E+08 | -0.13486 | 0.045287 | 0 |
| chr1 | 2.14E+08 | 2.14E+08 | 798  | 1012 | 2.14E+08 | -0.14679 | 0.032819 | 0 |
| chr1 | 2.15E+08 | 2.16E+08 | 698  | 893  | 2.16E+08 | -0.15947 | 0.022825 | 0 |
| chr1 | 2.16E+08 | 2.16E+08 | 601  | 754  | 2.16E+08 | -0.13124 | 0.04976  | 0 |
| chr1 | 2.16E+08 | 2.16E+08 | 617  | 800  | 2.16E+08 | -0.17877 | 0.012611 | 0 |
| chr1 | 2.17E+08 | 2.17E+08 | 629  | 812  | 2.17E+08 | -0.17246 | 0.015394 | 0 |
| chr1 | 2.17E+08 | 2.17E+08 | 687  | 879  | 2.17E+08 | -0.15959 | 0.022745 | 0 |
| chr1 | 2.17E+08 | 2.17E+08 | 776  | 804  | 2.17E+08 | 0.144824 | 0.033712 | 0 |
| chr1 | 2.17E+08 | 2.17E+08 | 704  | 900  | 2.17E+08 | -0.15839 | 0.023564 | 0 |
| chr1 | 2.18E+08 | 2.18E+08 | 665  | 841  | 2.18E+08 | -0.14279 | 0.036636 | 0 |
| chr1 | 2.18E+08 | 2.18E+08 | 730  | 939  | 2.18E+08 | -0.16727 | 0.018068 | 0 |
| chr1 | 2.18E+08 | 2.18E+08 | 757  | 961  | 2.18E+08 | -0.14828 | 0.031479 | 0 |
| chr1 | 2.18E+08 | 2.18E+08 | 722  | 920  | 2.18E+08 | -0.15367 | 0.027018 | 0 |
| chr1 | 2.19E+08 | 2.19E+08 | 772  | 1000 | 2.19E+08 | -0.17736 | 0.013188 | 0 |
| chr1 | 2.19E+08 | 2.19E+08 | 692  | 879  | 2.19E+08 | -0.14913 | 0.030739 | 0 |
| chr1 | 2.2E+08  | 2.2E+08  | 686  | 870  | 2.2E+08  | -0.14684 | 0.032766 | 0 |
| chr1 | 2.2E+08  | 2.2E+08  | 765  | 969  | 2.2E+08  | -0.14507 | 0.034411 | 0 |
| chr1 | 2.2E+08  | 2.2E+08  | 705  | 900  | 2.2E+08  | -0.15634 | 0.025015 | 0 |
| chr1 | 2.2E+08  | 2.2E+08  | 832  | 866  | 2.2E+08  | 0.13818  | 0.040493 | 0 |
| chr1 | 2.2E+08  | 2.2E+08  | 808  | 838  | 2.2E+08  | 0.143368 | 0.035112 | 0 |
| chr1 | 2.21E+08 | 2.21E+08 | 794  | 1028 | 2.21E+08 | -0.17667 | 0.013484 | 0 |
| chr1 | 2.21E+08 | 2.21E+08 | 796  | 1032 | 2.21E+08 | -0.17864 | 0.012662 | 0 |
| chr1 | 2.22E+08 | 2.23E+08 | 742  | 961  | 2.22E+08 | -0.17715 | 0.013277 | 0 |
| chr1 | 2.23E+08 | 2.23E+08 | 740  | 942  | 2.23E+08 | -0.15224 | 0.028149 | 0 |
| chr1 | 2.23E+08 | 2.23E+08 | 992  | 1035 | 2.23E+08 | 0.134744 | 0.044412 | 0 |
| chr1 | 2.23E+08 | 2.23E+08 | 990  | 1013 | 2.23E+08 | 0.162829 | 0.019894 | 0 |
| chr1 | 2.24E+08 | 2.24E+08 | 971  | 990  | 2.24E+08 | 0.168006 | 0.016953 | 0 |
| chr1 | 2.24E+08 | 2.24E+08 | 790  | 825  | 2.24E+08 | 0.133422 | 0.046001 | 0 |
| chr1 | 2.24E+08 | 2.25E+08 | 852  | 859  | 2.25E+08 | 0.184158 | 0.010044 | 0 |
| chr1 | 2.25E+08 | 2.25E+08 | 585  | 739  | 2.25E+08 | -0.14117 | 0.038277 | 0 |
| chr1 | 2.26E+08 | 2.26E+08 | 1015 | 1035 | 2.26E+08 | 0.167812 | 0.017056 | 0 |
| chr1 | 2.26E+08 | 2.26E+08 | 804  | 1023 | 2.26E+08 | -0.15158 | 0.028685 | 0 |

|      |          |          |      |      |          |          |          |   |
|------|----------|----------|------|------|----------|----------|----------|---|
| chr1 | 2.26E+08 | 2.26E+08 | 848  | 887  | 2.26E+08 | 0.131093 | 0.048908 | 0 |
| chr1 | 2.26E+08 | 2.26E+08 | 907  | 948  | 2.26E+08 | 0.132179 | 0.047535 | 0 |
| chr1 | 2.26E+08 | 2.26E+08 | 901  | 916  | 2.26E+08 | 0.172143 | 0.014878 | 0 |
| chr1 | 2.26E+08 | 2.27E+08 | 856  | 881  | 2.26E+08 | 0.154432 | 0.025585 | 0 |
| chr1 | 2.27E+08 | 2.27E+08 | 1146 | 1169 | 2.27E+08 | 0.167295 | 0.017333 | 0 |
| chr1 | 2.27E+08 | 2.27E+08 | 887  | 921  | 2.27E+08 | 0.141696 | 0.036778 | 0 |
| chr1 | 2.27E+08 | 2.27E+08 | 988  | 1003 | 2.27E+08 | 0.174224 | 0.013919 | 0 |
| chr1 | 2.27E+08 | 2.27E+08 | 953  | 995  | 2.27E+08 | 0.133743 | 0.045611 | 0 |
| chr1 | 2.28E+08 | 2.28E+08 | 721  | 908  | 2.28E+08 | -0.13673 | 0.043112 | 0 |
| chr1 | 2.28E+08 | 2.28E+08 | 1007 | 1040 | 2.28E+08 | 0.149443 | 0.029572 | 0 |
| chr1 | 2.28E+08 | 2.28E+08 | 944  | 962  | 2.28E+08 | 0.168713 | 0.016581 | 0 |
| chr1 | 2.28E+08 | 2.28E+08 | 1203 | 1255 | 2.28E+08 | 0.134912 | 0.044214 | 0 |
| chr1 | 2.28E+08 | 2.29E+08 | 1143 | 1195 | 2.28E+08 | 0.131778 | 0.048038 | 0 |
| chr1 | 2.29E+08 | 2.29E+08 | 1101 | 1133 | 2.29E+08 | 0.15463  | 0.025437 | 0 |
| chr1 | 2.29E+08 | 2.29E+08 | 981  | 1008 | 2.29E+08 | 0.156792 | 0.023862 | 0 |
| chr1 | 2.29E+08 | 2.29E+08 | 574  | 588  | 2.29E+08 | 0.161198 | 0.020907 | 0 |
| chr1 | 2.29E+08 | 2.29E+08 | 968  | 1004 | 2.29E+08 | 0.143283 | 0.035195 | 0 |
| chr1 | 2.3E+08  | 2.3E+08  | 1100 | 1132 | 2.3E+08  | 0.154593 | 0.025465 | 0 |
| chr1 | 2.3E+08  | 2.3E+08  | 1006 | 1040 | 2.3E+08  | 0.14801  | 0.030809 | 0 |
| chr1 | 2.3E+08  | 2.3E+08  | 1025 | 1040 | 2.3E+08  | 0.175003 | 0.013574 | 0 |
| chr1 | 2.3E+08  | 2.31E+08 | 1018 | 1054 | 2.3E+08  | 0.145826 | 0.032776 | 0 |
| chr1 | 2.31E+08 | 2.31E+08 | 741  | 958  | 2.31E+08 | -0.17459 | 0.014399 | 0 |
| chr1 | 2.31E+08 | 2.31E+08 | 725  | 916  | 2.31E+08 | -0.1414  | 0.038041 | 0 |
| chr1 | 2.31E+08 | 2.31E+08 | 922  | 961  | 2.31E+08 | 0.136193 | 0.042724 | 0 |
| chr1 | 2.35E+08 | 2.35E+08 | 1064 | 1097 | 2.35E+08 | 0.151898 | 0.02755  | 0 |
| chr1 | 2.35E+08 | 2.35E+08 | 958  | 1000 | 2.35E+08 | 0.134061 | 0.045228 | 0 |
| chr1 | 2.36E+08 | 2.36E+08 | 708  | 739  | 2.36E+08 | 0.134138 | 0.045135 | 0 |
| chr1 | 2.36E+08 | 2.36E+08 | 840  | 860  | 2.36E+08 | 0.162016 | 0.020394 | 0 |
| chr1 | 2.37E+08 | 2.37E+08 | 830  | 854  | 2.37E+08 | 0.154838 | 0.025281 | 0 |
| chr1 | 2.37E+08 | 2.37E+08 | 708  | 896  | 2.37E+08 | -0.14379 | 0.035651 | 0 |
| chr1 | 2.37E+08 | 2.37E+08 | 858  | 885  | 2.37E+08 | 0.151263 | 0.028062 | 0 |
| chr1 | 2.37E+08 | 2.37E+08 | 890  | 913  | 2.37E+08 | 0.159154 | 0.022237 | 0 |
| chr1 | 2.38E+08 | 2.38E+08 | 743  | 946  | 2.38E+08 | -0.15251 | 0.027928 | 0 |
| chr1 | 2.38E+08 | 2.38E+08 | 700  | 885  | 2.38E+08 | -0.14236 | 0.037067 | 0 |
| chr1 | 2.38E+08 | 2.38E+08 | 669  | 856  | 2.38E+08 | -0.15964 | 0.02271  | 0 |
| chr1 | 2.38E+08 | 2.38E+08 | 645  | 826  | 2.38E+08 | -0.16088 | 0.021894 | 0 |
| chr1 | 2.38E+08 | 2.39E+08 | 697  | 725  | 2.39E+08 | 0.139141 | 0.039449 | 0 |
| chr1 | 2.39E+08 | 2.39E+08 | 610  | 784  | 2.39E+08 | -0.16608 | 0.01873  | 0 |
| chr1 | 2.39E+08 | 2.39E+08 | 626  | 800  | 2.39E+08 | -0.15787 | 0.02392  | 0 |
| chr1 | 2.39E+08 | 2.39E+08 | 625  | 797  | 2.39E+08 | -0.15476 | 0.026185 | 0 |
| chr1 | 2.4E+08  | 2.4E+08  | 653  | 848  | 2.4E+08  | -0.18102 | 0.011729 | 0 |
| chr1 | 2.4E+08  | 2.4E+08  | 592  | 749  | 2.4E+08  | -0.14341 | 0.036024 | 0 |
| chr1 | 2.4E+08  | 2.4E+08  | 699  | 895  | 2.4E+08  | -0.16063 | 0.022055 | 0 |
| chr1 | 2.42E+08 | 2.42E+08 | 835  | 1048 | 2.42E+08 | -0.13183 | 0.049007 | 0 |
| chr1 | 2.42E+08 | 2.42E+08 | 873  | 904  | 2.42E+08 | 0.145622 | 0.032964 | 0 |
| chr1 | 2.42E+08 | 2.42E+08 | 843  | 853  | 2.42E+08 | 0.17895  | 0.011939 | 0 |
| chr1 | 2.42E+08 | 2.42E+08 | 762  | 796  | 2.42E+08 | 0.132986 | 0.046534 | 0 |



|       |          |          |      |     |          |          |          |   |
|-------|----------|----------|------|-----|----------|----------|----------|---|
| chr1  | 2.42E+08 | 2.42E+08 | 480  | 606 | 2.42E+08 | -0.14032 | 0.03917  | 0 |
| chr1  | 2.43E+08 | 2.43E+08 | 605  | 771 | 2.43E+08 | -0.15383 | 0.026894 | 0 |
| chr1  | 2.43E+08 | 2.43E+08 | 647  | 835 | 2.43E+08 | -0.17205 | 0.015592 | 0 |
| chr1  | 2.43E+08 | 2.43E+08 | 96   | 97  | 2.43E+08 | 0.181013 | 0.011154 | 0 |
| chr1  | 2.44E+08 | 2.44E+08 | 924  | 967 | 2.44E+08 | 0.13034  | 0.049879 | 0 |
| chr1  | 2.44E+08 | 2.44E+08 | 952  | 993 | 2.44E+08 | 0.135131 | 0.043957 | 0 |
| chr1  | 2.45E+08 | 2.45E+08 | 831  | 852 | 2.45E+08 | 0.159958 | 0.021705 | 0 |
| chr1  | 2.45E+08 | 2.45E+08 | 891  | 927 | 2.45E+08 | 0.138819 | 0.039796 | 0 |
| chr1  | 2.45E+08 | 2.45E+08 | 917  | 953 | 2.45E+08 | 0.140409 | 0.038104 | 0 |
| chr1  | 2.46E+08 | 2.46E+08 | 724  | 934 | 2.46E+08 | -0.17147 | 0.015874 | 0 |
| chr1  | 2.47E+08 | 2.47E+08 | 842  | 860 | 2.47E+08 | 0.165447 | 0.018357 | 0 |
| chr1  | 2.47E+08 | 2.48E+08 | 924  | 953 | 2.48E+08 | 0.15138  | 0.027967 | 0 |
| chr1  | 2.48E+08 | 2.48E+08 | 464  | 603 | 2.48E+08 | -0.18207 | 0.011336 | 0 |
| chr1  | 2.48E+08 | 2.48E+08 | 474  | 613 | 2.48E+08 | -0.17504 | 0.014198 | 0 |
| chr1  | 2.49E+08 | 2.49E+08 | 71   | 90  | 2.49E+08 | -0.14614 | 0.033409 | 0 |
| chr10 | 1        | 100000   | 18   | 24  | 50000    | -0.21907 | 0.003112 | 0 |
| chr10 | 50001    | 150000   | 278  | 244 | 1.00E+05 | 0.384167 | 7.27E-07 | 0 |
| chr10 | 500001   | 600000   | 862  | 862 | 550000   | 0.195963 | 0.006694 | 0 |
| chr10 | 650001   | 750000   | 1049 | 996 | 7.00E+05 | 0.27076  | 0.000323 | 0 |
| chr10 | 700001   | 800000   | 922  | 917 | 750000   | 0.203808 | 0.005056 | 0 |
| chr10 | 950001   | 1050000  | 976  | 974 | 1.00E+06 | 0.198922 | 0.006028 | 0 |
| chr10 | 1000001  | 1100000  | 961  | 959 | 1050000  | 0.198969 | 0.006018 | 0 |
| chr10 | 2050001  | 2150000  | 748  | 979 | 2100000  | -0.19231 | 0.008074 | 0 |
| chr10 | 2350001  | 2450000  | 745  | 983 | 2400000  | -0.20399 | 0.005389 | 0 |
| chr10 | 6200001  | 6300000  | 985  | 987 | 6250000  | 0.193037 | 0.007416 | 0 |
| chr10 | 6250001  | 6350000  | 939  | 944 | 6300000  | 0.188301 | 0.00873  | 0 |
| chr10 | 6900001  | 7000000  | 696  | 925 | 6950000  | -0.2144  | 0.003701 | 0 |
| chr10 | 8600001  | 8700000  | 653  | 851 | 8650000  | -0.18611 | 0.009931 | 0 |
| chr10 | 8650001  | 8750000  | 644  | 883 | 8700000  | -0.25939 | 0.000619 | 0 |
| chr10 | 8800001  | 8900000  | 608  | 793 | 8850000  | -0.18729 | 0.009552 | 0 |
| chr10 | 8850001  | 8950000  | 600  | 784 | 8900000  | -0.18993 | 0.008747 | 0 |
| chr10 | 9250001  | 9350000  | 628  | 892 | 9300000  | -0.31032 | 5.93E-05 | 0 |
| chr10 | 9300001  | 9400000  | 650  | 862 | 9350000  | -0.21129 | 0.004148 | 0 |
| chr10 | 10450001 | 10550000 | 629  | 860 | 10500000 | -0.25531 | 0.000736 | 0 |
| chr10 | 10500001 | 10600000 | 637  | 909 | 10550000 | -0.31702 | 4.25E-05 | 0 |
| chr10 | 12350001 | 12450000 | 861  | 832 | 12400000 | 0.245393 | 0.000987 | 0 |
| chr10 | 14600001 | 14700000 | 986  | 984 | 14650000 | 0.198892 | 0.006034 | 0 |
| chr10 | 16100001 | 16200000 | 630  | 827 | 16150000 | -0.19657 | 0.00698  | 0 |
| chr10 | 16600001 | 16700000 | 654  | 908 | 16650000 | -0.27744 | 0.00028  | 0 |
| chr10 | 17200001 | 17300000 | 921  | 928 | 17250000 | 0.185039 | 0.009751 | 0 |
| chr10 | 17650001 | 17750000 | 863  | 847 | 17700000 | 0.222962 | 0.002457 | 0 |
| chr10 | 17700001 | 17800000 | 671  | 655 | 17750000 | 0.230781 | 0.001803 | 0 |
| chr10 | 17800001 | 17900000 | 5    | 7   | 17850000 | -0.28946 | 0.000161 | 0 |
| chr10 | 17850001 | 17950000 | 3    | 6   | 17900000 | -0.80404 | 3.29E-21 | 0 |
| chr10 | 17900001 | 18000000 | 1    | 5   | 17950000 | -2.12597 | 6.56E-79 | 0 |
| chr10 | 17950001 | 18050000 | 1    | 4   | 1.80E+07 | -1.80404 | 2.39E-66 | 0 |
| chr10 | 18050001 | 18150000 | 2    | 5   | 18100000 | -1.12597 | 1.27E-35 | 0 |

|       |          |          |     |     |          |          |           |   |
|-------|----------|----------|-----|-----|----------|----------|-----------|---|
| chr10 | 18100001 | 18200000 | 2   | 8   | 18150000 | -1.80404 | 2.39E-66  | 0 |
| chr10 | 18500001 | 18600000 | 668 | 877 | 18550000 | -0.19677 | 0.006934  | 0 |
| chr10 | 18850001 | 18950000 | 712 | 704 | 18900000 | 0.212265 | 0.0037    | 0 |
| chr10 | 19900001 | 20000000 | 568 | 754 | 19950000 | -0.21271 | 0.003938  | 0 |
| chr10 | 20050001 | 20150000 | 621 | 814 | 20100000 | -0.19447 | 0.007501  | 0 |
| chr10 | 20100001 | 20200000 | 635 | 847 | 20150000 | -0.21964 | 0.003047  | 0 |
| chr10 | 20900001 | 21000000 | 655 | 863 | 20950000 | -0.2019  | 0.0058    | 0 |
| chr10 | 25700001 | 25800000 | 611 | 803 | 25750000 | -0.19826 | 0.006584  | 0 |
| chr10 | 26000001 | 26100000 | 548 | 723 | 26050000 | -0.20386 | 0.005414  | 0 |
| chr10 | 26050001 | 26150000 | 621 | 815 | 26100000 | -0.19624 | 0.00706   | 0 |
| chr10 | 28850001 | 28950000 | 940 | 938 | 28900000 | 0.199036 | 0.006003  | 0 |
| chr10 | 34050001 | 34150000 | 648 | 846 | 34100000 | -0.1887  | 0.009114  | 0 |
| chr10 | 36300001 | 36400000 | 647 | 855 | 36350000 | -0.2062  | 0.004982  | 0 |
| chr10 | 36350001 | 36450000 | 626 | 816 | 36400000 | -0.18644 | 0.009823  | 0 |
| chr10 | 36650001 | 36750000 | 512 | 694 | 36700000 | -0.24283 | 0.001233  | 0 |
| chr10 | 36700001 | 36800000 | 585 | 764 | 36750000 | -0.18917 | 0.008971  | 0 |
| chr10 | 37250001 | 37350000 | 347 | 475 | 37300000 | -0.25703 | 0.000684  | 0 |
| chr10 | 37300001 | 37400000 | 349 | 456 | 37350000 | -0.18984 | 0.008772  | 0 |
| chr10 | 37350001 | 37450000 | 380 | 498 | 37400000 | -0.19418 | 0.007575  | 0 |
| chr10 | 37400001 | 37500000 | 234 | 327 | 37450000 | -0.28682 | 0.000183  | 0 |
| chr10 | 37450001 | 37550000 | 328 | 457 | 37500000 | -0.28254 | 0.000222  | 0 |
| chr10 | 37500001 | 37600000 | 525 | 698 | 37550000 | -0.21495 | 0.003627  | 0 |
| chr10 | 37900001 | 38000000 | 462 | 608 | 37950000 | -0.20022 | 0.006153  | 0 |
| chr10 | 38150001 | 38250000 | 606 | 811 | 38200000 | -0.22442 | 0.002543  | 0 |
| chr10 | 38450001 | 38550000 | 280 | 367 | 38500000 | -0.19439 | 0.007522  | 0 |
| chr10 | 38500001 | 38600000 | 160 | 245 | 38550000 | -0.41875 | 1.36E-07  | 0 |
| chr10 | 38550001 | 38650000 | 140 | 184 | 38600000 | -0.19832 | 0.006573  | 0 |
| chr10 | 38600001 | 38700000 | 102 | 99  | 38650000 | 0.239032 | 0.001288  | 0 |
| chr10 | 38650001 | 38750000 | 76  | 74  | 38700000 | 0.234437 | 0.001555  | 0 |
| chr10 | 46200001 | 46300000 | 43  | 61  | 46250000 | -0.30851 | 6.49E-05  | 0 |
| chr10 | 46250001 | 46350000 | 11  | 10  | 46300000 | 0.333467 | 1.38E-05  | 0 |
| chr10 | 46450001 | 46550000 | 9   | 8   | 46500000 | 0.365888 | 2.19E-06  | 0 |
| chr10 | 46500001 | 46600000 | 10  | 14  | 46550000 | -0.28946 | 0.000161  | 0 |
| chr10 | 46850001 | 46950000 | 20  | 17  | 46900000 | 0.430428 | 3.65E-08  | 0 |
| chr10 | 47400001 | 47500000 | 4   | 6   | 47450000 | -0.389   | 8.31E-07  | 0 |
| chr10 | 47450001 | 47550000 | 53  | 70  | 47500000 | -0.2054  | 0.005126  | 0 |
| chr10 | 47750001 | 47850000 | 1   | 3   | 47800000 | -1.389   | 6.26E-48  | 0 |
| chr10 | 47800001 | 47900000 | 0   | 1   | 47850000 | #NAME?   | 3.67E-137 | 0 |
| chr10 | 47850001 | 47950000 | 0   | 1   | 47900000 | #NAME?   | 3.67E-137 | 0 |
| chr10 | 47900001 | 48000000 | 6   | 8   | 47950000 | -0.21907 | 0.003112  | 0 |
| chr10 | 47950001 | 48050000 | 12  | 9   | 4.80E+07 | 0.611001 | 2.44E-14  | 0 |
| chr10 | 48000001 | 48100000 | 6   | 1   | 48050000 | 2.780926 | 2.00E-112 | 0 |
| chr10 | 48050001 | 48150000 | 2   | 1   | 48100000 | 1.195963 | 1.84E-42  | 0 |
| chr10 | 48100001 | 48200000 | 2   | 2   | 48150000 | 0.195963 | 0.006694  | 0 |
| chr10 | 48150001 | 48250000 | 0   | 1   | 48200000 | #NAME?   | 3.67E-137 | 0 |
| chr10 | 48650001 | 48750000 | 150 | 144 | 48700000 | 0.254857 | 0.000658  | 0 |
| chr10 | 48700001 | 48800000 | 1   | 3   | 48750000 | -1.389   | 6.26E-48  | 0 |

|       |          |          |     |      |          |          |           |   |
|-------|----------|----------|-----|------|----------|----------|-----------|---|
| chr10 | 48750001 | 48850000 | 3   | 3    | 48800000 | 0.195963 | 0.006694  | 0 |
| chr10 | 48800001 | 48900000 | 11  | 7    | 48850000 | 0.84804  | 1.20E-24  | 0 |
| chr10 | 48850001 | 48950000 | 15  | 8    | 48900000 | 1.102854 | 1.62E-37  | 0 |
| chr10 | 48900001 | 49000000 | 17  | 17   | 48950000 | 0.195963 | 0.006694  | 0 |
| chr10 | 48950001 | 49050000 | 10  | 15   | 4.90E+07 | -0.389   | 8.31E-07  | 0 |
| chr10 | 49000001 | 49100000 | 1   | 2    | 49050000 | -0.80404 | 3.29E-21  | 0 |
| chr10 | 49050001 | 49150000 | 1   | 1    | 49100000 | 0.195963 | 0.006694  | 0 |
| chr10 | 49100001 | 49200000 | 0   | 1    | 49150000 | #NAME?   | 3.67E-137 | 0 |
| chr10 | 49150001 | 49250000 | 9   | 18   | 49200000 | -0.80404 | 3.29E-21  | 0 |
| chr10 | 49200001 | 49300000 | 12  | 18   | 49250000 | -0.389   | 8.31E-07  | 0 |
| chr10 | 49250001 | 49350000 | 5   | 3    | 49300000 | 0.932929 | 8.75E-29  | 0 |
| chr10 | 49300001 | 49400000 | 110 | 104  | 49350000 | 0.276883 | 0.000243  | 0 |
| chr10 | 51200001 | 51300000 | 5   | 2    | 51250000 | 1.517891 | 1.18E-59  | 0 |
| chr10 | 51250001 | 51350000 | 3   | 2    | 51300000 | 0.780926 | 1.60E-21  | 0 |
| chr10 | 51300001 | 51400000 | 3   | 7    | 51350000 | -1.02643 | 5.11E-31  | 0 |
| chr10 | 51350001 | 51450000 | 3   | 7    | 51400000 | -1.02643 | 5.11E-31  | 0 |
| chr10 | 51400001 | 51500000 | 89  | 67   | 51450000 | 0.605607 | 3.93E-14  | 0 |
| chr10 | 51600001 | 51700000 | 4   | 2    | 51650000 | 1.195963 | 1.84E-42  | 0 |
| chr10 | 51650001 | 51750000 | 15  | 27   | 51700000 | -0.65203 | 3.56E-15  | 0 |
| chr10 | 51800001 | 51900000 | 52  | 76   | 51850000 | -0.35152 | 6.99E-06  | 0 |
| chr10 | 51850001 | 51950000 | 4   | 7    | 51900000 | -0.61139 | 1.08E-13  | 0 |
| chr10 | 51900001 | 52000000 | 7   | 3    | 51950000 | 1.418355 | 2.22E-54  | 0 |
| chr10 | 52450001 | 52550000 | 147 | 140  | 52500000 | 0.266352 | 0.000395  | 0 |
| chr10 | 52550001 | 52650000 | 924 | 1205 | 52600000 | -0.18711 | 0.00961   | 0 |
| chr10 | 52600001 | 52700000 | 877 | 1165 | 52650000 | -0.21372 | 0.003795  | 0 |
| chr10 | 53650001 | 53750000 | 802 | 1061 | 53700000 | -0.20779 | 0.004706  | 0 |
| chr10 | 54550001 | 54650000 | 806 | 1056 | 54600000 | -0.1938  | 0.007676  | 0 |
| chr10 | 54750001 | 54850000 | 826 | 1077 | 54800000 | -0.18684 | 0.009694  | 0 |
| chr10 | 54900001 | 55000000 | 752 | 1026 | 54950000 | -0.25226 | 0.000836  | 0 |
| chr10 | 54950001 | 55050000 | 759 | 1037 | 5.50E+07 | -0.25428 | 0.000768  | 0 |
| chr10 | 55100001 | 55200000 | 704 | 920  | 55150000 | -0.1901  | 0.008698  | 0 |
| chr10 | 55550001 | 55650000 | 702 | 949  | 55600000 | -0.23897 | 0.00144   | 0 |
| chr10 | 55900001 | 56000000 | 683 | 898  | 55950000 | -0.19887 | 0.006448  | 0 |
| chr10 | 56150001 | 56250000 | 601 | 792  | 56200000 | -0.20217 | 0.005745  | 0 |
| chr10 | 56850001 | 56950000 | 741 | 975  | 56900000 | -0.19997 | 0.006206  | 0 |
| chr10 | 56900001 | 57000000 | 725 | 970  | 56950000 | -0.22404 | 0.00258   | 0 |
| chr10 | 57500001 | 57600000 | 527 | 707  | 57550000 | -0.22794 | 0.002222  | 0 |
| chr10 | 58150001 | 58250000 | 638 | 855  | 58200000 | -0.2264  | 0.002357  | 0 |
| chr10 | 58450001 | 58550000 | 750 | 980  | 58500000 | -0.18993 | 0.008747  | 0 |
| chr10 | 58500001 | 58600000 | 763 | 1008 | 58550000 | -0.20578 | 0.005057  | 0 |
| chr10 | 58750001 | 58850000 | 774 | 1027 | 58800000 | -0.21207 | 0.004031  | 0 |
| chr10 | 59450001 | 59550000 | 726 | 960  | 59500000 | -0.2071  | 0.004823  | 0 |
| chr10 | 59600001 | 59700000 | 725 | 952  | 59650000 | -0.19702 | 0.006874  | 0 |
| chr10 | 59650001 | 59750000 | 772 | 1049 | 59700000 | -0.24638 | 0.001067  | 0 |
| chr10 | 59700001 | 59800000 | 803 | 1113 | 59750000 | -0.27502 | 0.000312  | 0 |
| chr10 | 60900001 | 61000000 | 670 | 668  | 60950000 | 0.200276 | 0.005743  | 0 |
| chr10 | 62050001 | 62150000 | 691 | 919  | 62100000 | -0.21542 | 0.003565  | 0 |

|       |          |          |      |      |          |          |          |   |
|-------|----------|----------|------|------|----------|----------|----------|---|
| chr10 | 65500001 | 65600000 | 668  | 888  | 65550000 | -0.21475 | 0.003654 | 0 |
| chr10 | 66150001 | 66250000 | 588  | 786  | 66200000 | -0.22275 | 0.00271  | 0 |
| chr10 | 66200001 | 66300000 | 576  | 756  | 66250000 | -0.19635 | 0.007033 | 0 |
| chr10 | 66750001 | 66850000 | 577  | 817  | 66800000 | -0.3058  | 7.41E-05 | 0 |
| chr10 | 66800001 | 66900000 | 502  | 693  | 66850000 | -0.2692  | 0.000404 | 0 |
| chr10 | 67000001 | 67100000 | 566  | 744  | 67050000 | -0.19854 | 0.006522 | 0 |
| chr10 | 67450001 | 67550000 | 591  | 780  | 67500000 | -0.20435 | 0.00532  | 0 |
| chr10 | 68500001 | 68600000 | 667  | 870  | 68550000 | -0.18737 | 0.009527 | 0 |
| chr10 | 68550001 | 68650000 | 645  | 872  | 68600000 | -0.23907 | 0.001435 | 0 |
| chr10 | 69250001 | 69350000 | 517  | 689  | 69300000 | -0.21838 | 0.003194 | 0 |
| chr10 | 69800001 | 69900000 | 951  | 940  | 69850000 | 0.212748 | 0.003634 | 0 |
| chr10 | 69850001 | 69950000 | 1000 | 946  | 69900000 | 0.276051 | 0.000253 | 0 |
| chr10 | 70050001 | 70150000 | 874  | 880  | 70100000 | 0.186093 | 0.009411 | 0 |
| chr10 | 70200001 | 70300000 | 742  | 735  | 70250000 | 0.209638 | 0.004081 | 0 |
| chr10 | 70250001 | 70350000 | 736  | 739  | 70300000 | 0.190094 | 0.00821  | 0 |
| chr10 | 70650001 | 70750000 | 885  | 880  | 70700000 | 0.204137 | 0.004996 | 0 |
| chr10 | 70900001 | 71000000 | 929  | 934  | 70950000 | 0.188219 | 0.008755 | 0 |
| chr10 | 71550001 | 71650000 | 1178 | 1181 | 71600000 | 0.192294 | 0.00761  | 0 |
| chr10 | 73550001 | 73650000 | 1033 | 977  | 73600000 | 0.276373 | 0.000249 | 0 |
| chr10 | 73600001 | 73700000 | 904  | 875  | 73650000 | 0.243003 | 0.001092 | 0 |
| chr10 | 73850001 | 73950000 | 950  | 937  | 73900000 | 0.215842 | 0.003232 | 0 |
| chr10 | 74000001 | 74100000 | 1005 | 882  | 74050000 | 0.384308 | 7.20E-07 | 0 |
| chr10 | 74050001 | 74150000 | 1039 | 943  | 74100000 | 0.335829 | 1.22E-05 | 0 |
| chr10 | 75450001 | 75550000 | 698  | 687  | 75500000 | 0.21888  | 0.002878 | 0 |
| chr10 | 75500001 | 75600000 | 1111 | 1088 | 75550000 | 0.226143 | 0.002168 | 0 |
| chr10 | 75550001 | 75650000 | 1174 | 1178 | 75600000 | 0.191056 | 0.007943 | 0 |
| chr10 | 78600001 | 78700000 | 648  | 897  | 78650000 | -0.27315 | 0.00034  | 0 |
| chr10 | 78650001 | 78750000 | 757  | 991  | 78700000 | -0.19263 | 0.007986 | 0 |
| chr10 | 79650001 | 79750000 | 971  | 976  | 79700000 | 0.188553 | 0.008656 | 0 |
| chr10 | 80950001 | 81050000 | 1184 | 1189 | 8.10E+07 | 0.189883 | 0.00827  | 0 |
| chr10 | 81400001 | 81500000 | 79   | 78   | 81450000 | 0.214342 | 0.003422 | 0 |
| chr10 | 82400001 | 82500000 | 740  | 974  | 82450000 | -0.20043 | 0.006106 | 0 |
| chr10 | 82550001 | 82650000 | 542  | 741  | 82600000 | -0.25522 | 0.000739 | 0 |
| chr10 | 82600001 | 82700000 | 592  | 819  | 82650000 | -0.2723  | 0.000353 | 0 |
| chr10 | 83250001 | 83350000 | 569  | 766  | 83300000 | -0.23295 | 0.001829 | 0 |
| chr10 | 83900001 | 84000000 | 634  | 834  | 83950000 | -0.1996  | 0.006286 | 0 |
| chr10 | 84100001 | 84200000 | 558  | 737  | 84150000 | -0.20544 | 0.005119 | 0 |
| chr10 | 84700001 | 84800000 | 604  | 802  | 84750000 | -0.21309 | 0.003883 | 0 |
| chr10 | 86400001 | 86500000 | 622  | 815  | 86450000 | -0.19392 | 0.007643 | 0 |
| chr10 | 87300001 | 87400000 | 700  | 915  | 87350000 | -0.19045 | 0.008594 | 0 |
| chr10 | 88700001 | 88800000 | 698  | 675  | 88750000 | 0.244303 | 0.001034 | 0 |
| chr10 | 88750001 | 88850000 | 484  | 482  | 88800000 | 0.201937 | 0.00541  | 0 |
| chr10 | 88800001 | 88900000 | 537  | 530  | 88850000 | 0.214893 | 0.003351 | 0 |
| chr10 | 88900001 | 89000000 | 77   | 110  | 88950000 | -0.31861 | 3.93E-05 | 0 |
| chr10 | 89050001 | 89150000 | 30   | 41   | 89100000 | -0.2547  | 0.000755 | 0 |
| chr10 | 95200001 | 95300000 | 872  | 876  | 95250000 | 0.18936  | 0.00842  | 0 |
| chr10 | 96750001 | 96850000 | 488  | 668  | 96800000 | -0.257   | 0.000685 | 0 |

|       |          |          |      |      |          |          |          |   |
|-------|----------|----------|------|------|----------|----------|----------|---|
| chr10 | 97900001 | 98000000 | 726  | 951  | 97950000 | -0.19351 | 0.00775  | 0 |
| chr10 | 98850001 | 98950000 | 1151 | 1140 | 98900000 | 0.209817 | 0.004054 | 0 |
| chr10 | 98900001 | 99000000 | 1038 | 1040 | 98950000 | 0.193186 | 0.007377 | 0 |
| chr10 | 99050001 | 99150000 | 978  | 916  | 99100000 | 0.29045  | 0.000128 | 0 |
| chr10 | 99100001 | 99200000 | 952  | 917  | 99150000 | 0.250003 | 0.000811 | 0 |
| chr10 | 99350001 | 99450000 | 976  | 974  | 99400000 | 0.198922 | 0.006028 | 0 |
| chr10 | 99400001 | 99500000 | 1008 | 978  | 99450000 | 0.239552 | 0.001261 | 0 |
| chr10 | 99450001 | 99550000 | 1068 | 1021 | 99500000 | 0.260892 | 0.000504 | 0 |
| chr10 | 99900001 | 1E+08    | 493  | 647  | 99950000 | -0.19622 | 0.007067 | 0 |
| chr10 | 1.01E+08 | 1.01E+08 | 397  | 524  | 1.01E+08 | -0.20446 | 0.005299 | 0 |
| chr10 | 1.02E+08 | 1.02E+08 | 529  | 513  | 1.02E+08 | 0.240272 | 0.001223 | 0 |
| chr10 | 1.02E+08 | 1.02E+08 | 701  | 687  | 1.02E+08 | 0.225067 | 0.002262 | 0 |
| chr10 | 1.02E+08 | 1.02E+08 | 713  | 685  | 1.02E+08 | 0.253761 | 0.00069  | 0 |
| chr10 | 1.03E+08 | 1.03E+08 | 800  | 769  | 1.03E+08 | 0.252979 | 0.000714 | 0 |
| chr10 | 1.03E+08 | 1.03E+08 | 726  | 673  | 1.03E+08 | 0.305326 | 6.09E-05 | 0 |
| chr10 | 1.03E+08 | 1.03E+08 | 680  | 676  | 1.03E+08 | 0.204475 | 0.004935 | 0 |
| chr10 | 1.03E+08 | 1.03E+08 | 748  | 730  | 1.03E+08 | 0.231105 | 0.001779 | 0 |
| chr10 | 1.04E+08 | 1.04E+08 | 641  | 639  | 1.04E+08 | 0.200471 | 0.005703 | 0 |
| chr10 | 1.04E+08 | 1.04E+08 | 606  | 580  | 1.04E+08 | 0.259228 | 0.000543 | 0 |
| chr10 | 1.04E+08 | 1.04E+08 | 690  | 681  | 1.04E+08 | 0.214905 | 0.003349 | 0 |
| chr10 | 1.04E+08 | 1.04E+08 | 632  | 609  | 1.04E+08 | 0.249445 | 0.000831 | 0 |
| chr10 | 1.05E+08 | 1.05E+08 | 603  | 593  | 1.05E+08 | 0.220089 | 0.002747 | 0 |
| chr10 | 1.05E+08 | 1.05E+08 | 500  | 497  | 1.05E+08 | 0.204645 | 0.004904 | 0 |
| chr10 | 1.05E+08 | 1.05E+08 | 615  | 588  | 1.05E+08 | 0.260733 | 0.000508 | 0 |
| chr10 | 1.05E+08 | 1.05E+08 | 722  | 698  | 1.05E+08 | 0.244735 | 0.001015 | 0 |
| chr10 | 1.05E+08 | 1.05E+08 | 827  | 789  | 1.05E+08 | 0.263825 | 0.000443 | 0 |
| chr10 | 1.05E+08 | 1.05E+08 | 829  | 793  | 1.05E+08 | 0.260014 | 0.000524 | 0 |
| chr10 | 1.05E+08 | 1.06E+08 | 772  | 775  | 1.05E+08 | 0.190368 | 0.008133 | 0 |
| chr10 | 1.06E+08 | 1.06E+08 | 762  | 743  | 1.06E+08 | 0.232392 | 0.001689 | 0 |
| chr10 | 1.06E+08 | 1.06E+08 | 752  | 755  | 1.06E+08 | 0.190219 | 0.008175 | 0 |
| chr10 | 1.08E+08 | 1.08E+08 | 380  | 498  | 1.08E+08 | -0.19418 | 0.007575 | 0 |
| chr10 | 1.08E+08 | 1.08E+08 | 371  | 497  | 1.08E+08 | -0.22586 | 0.002407 | 0 |
| chr10 | 1.08E+08 | 1.08E+08 | 388  | 534  | 1.08E+08 | -0.26482 | 0.00049  | 0 |
| chr10 | 1.08E+08 | 1.08E+08 | 401  | 542  | 1.08E+08 | -0.23873 | 0.001455 | 0 |
| chr10 | 1.08E+08 | 1.08E+08 | 406  | 562  | 1.08E+08 | -0.27313 | 0.00034  | 0 |
| chr10 | 1.08E+08 | 1.08E+08 | 401  | 552  | 1.08E+08 | -0.2651  | 0.000484 | 0 |
| chr10 | 1.08E+08 | 1.08E+08 | 406  | 565  | 1.08E+08 | -0.28081 | 0.000241 | 0 |
| chr10 | 1.08E+08 | 1.09E+08 | 405  | 546  | 1.08E+08 | -0.23502 | 0.001686 | 0 |
| chr10 | 1.09E+08 | 1.09E+08 | 404  | 535  | 1.09E+08 | -0.20922 | 0.00447  | 0 |
| chr10 | 1.09E+08 | 1.09E+08 | 362  | 494  | 1.09E+08 | -0.25256 | 0.000826 | 0 |
| chr10 | 1.09E+08 | 1.09E+08 | 370  | 501  | 1.09E+08 | -0.24132 | 0.001311 | 0 |
| chr10 | 1.09E+08 | 1.09E+08 | 396  | 540  | 1.09E+08 | -0.2515  | 0.000863 | 0 |
| chr10 | 1.09E+08 | 1.09E+08 | 408  | 538  | 1.09E+08 | -0.20307 | 0.005566 | 0 |
| chr10 | 1.09E+08 | 1.09E+08 | 413  | 560  | 1.09E+08 | -0.24332 | 0.001209 | 0 |
| chr10 | 1.09E+08 | 1.09E+08 | 406  | 559  | 1.09E+08 | -0.26541 | 0.000477 | 0 |
| chr10 | 1.1E+08  | 1.1E+08  | 418  | 551  | 1.1E+08  | -0.20259 | 0.005662 | 0 |
| chr10 | 1.1E+08  | 1.1E+08  | 379  | 514  | 1.1E+08  | -0.24361 | 0.001195 | 0 |

|       |          |          |     |     |          |          |          |   |
|-------|----------|----------|-----|-----|----------|----------|----------|---|
| chr10 | 1.1E+08  | 1.1E+08  | 416 | 564 | 1.1E+08  | -0.24315 | 0.001217 | 0 |
| chr10 | 1.1E+08  | 1.11E+08 | 423 | 565 | 1.1E+08  | -0.22163 | 0.002827 | 0 |
| chr10 | 1.1E+08  | 1.11E+08 | 425 | 563 | 1.11E+08 | -0.20971 | 0.004392 | 0 |
| chr10 | 1.11E+08 | 1.11E+08 | 379 | 494 | 1.11E+08 | -0.18635 | 0.009853 | 0 |
| chr10 | 1.11E+08 | 1.11E+08 | 329 | 459 | 1.11E+08 | -0.28444 | 0.000204 | 0 |
| chr10 | 1.12E+08 | 1.12E+08 | 689 | 692 | 1.12E+08 | 0.189695 | 0.008324 | 0 |
| chr10 | 1.13E+08 | 1.13E+08 | 739 | 727 | 1.13E+08 | 0.219582 | 0.002801 | 0 |
| chr10 | 1.13E+08 | 1.13E+08 | 707 | 708 | 1.13E+08 | 0.193924 | 0.00719  | 0 |
| chr10 | 1.13E+08 | 1.13E+08 | 521 | 682 | 1.13E+08 | -0.19253 | 0.008014 | 0 |
| chr10 | 1.13E+08 | 1.14E+08 | 497 | 693 | 1.14E+08 | -0.28365 | 0.000211 | 0 |
| chr10 | 1.14E+08 | 1.14E+08 | 500 | 655 | 1.14E+08 | -0.1936  | 0.007726 | 0 |
| chr10 | 1.14E+08 | 1.14E+08 | 628 | 629 | 1.14E+08 | 0.193668 | 0.007255 | 0 |
| chr10 | 1.15E+08 | 1.15E+08 | 645 | 639 | 1.15E+08 | 0.209446 | 0.00411  | 0 |
| chr10 | 1.15E+08 | 1.16E+08 | 494 | 651 | 1.15E+08 | -0.20218 | 0.005743 | 0 |
| chr10 | 1.15E+08 | 1.16E+08 | 504 | 657 | 1.16E+08 | -0.18651 | 0.009802 | 0 |
| chr10 | 1.16E+08 | 1.16E+08 | 485 | 638 | 1.16E+08 | -0.19961 | 0.006284 | 0 |
| chr10 | 1.17E+08 | 1.17E+08 | 504 | 657 | 1.17E+08 | -0.18651 | 0.009802 | 0 |
| chr10 | 1.17E+08 | 1.17E+08 | 411 | 546 | 1.17E+08 | -0.2138  | 0.003784 | 0 |
| chr10 | 1.17E+08 | 1.17E+08 | 404 | 538 | 1.17E+08 | -0.21729 | 0.003326 | 0 |
| chr10 | 1.17E+08 | 1.17E+08 | 365 | 486 | 1.17E+08 | -0.2171  | 0.00335  | 0 |
| chr10 | 1.17E+08 | 1.18E+08 | 411 | 547 | 1.18E+08 | -0.21644 | 0.003433 | 0 |
| chr10 | 1.18E+08 | 1.18E+08 | 489 | 638 | 1.18E+08 | -0.18776 | 0.009404 | 0 |
| chr10 | 1.18E+08 | 1.18E+08 | 422 | 584 | 1.18E+08 | -0.27276 | 0.000345 | 0 |
| chr10 | 1.2E+08  | 1.2E+08  | 471 | 618 | 1.2E+08  | -0.19592 | 0.007139 | 0 |
| chr10 | 1.2E+08  | 1.2E+08  | 503 | 673 | 1.2E+08  | -0.22409 | 0.002576 | 0 |
| chr10 | 1.2E+08  | 1.2E+08  | 517 | 681 | 1.2E+08  | -0.20153 | 0.005877 | 0 |
| chr10 | 1.21E+08 | 1.21E+08 | 540 | 541 | 1.21E+08 | 0.193294 | 0.00735  | 0 |
| chr10 | 1.21E+08 | 1.21E+08 | 605 | 607 | 1.21E+08 | 0.191202 | 0.007903 | 0 |
| chr10 | 1.21E+08 | 1.21E+08 | 678 | 675 | 1.21E+08 | 0.202361 | 0.005328 | 0 |
| chr10 | 1.21E+08 | 1.22E+08 | 633 | 635 | 1.21E+08 | 0.191412 | 0.007846 | 0 |
| chr10 | 1.22E+08 | 1.22E+08 | 591 | 587 | 1.22E+08 | 0.205761 | 0.004709 | 0 |
| chr10 | 1.23E+08 | 1.24E+08 | 602 | 602 | 1.24E+08 | 0.195963 | 0.006694 | 0 |
| chr10 | 1.24E+08 | 1.24E+08 | 595 | 592 | 1.24E+08 | 0.203256 | 0.005158 | 0 |
| chr10 | 1.25E+08 | 1.25E+08 | 674 | 679 | 1.25E+08 | 0.1853   | 0.009666 | 0 |
| chr10 | 1.27E+08 | 1.27E+08 | 755 | 735 | 1.27E+08 | 0.234695 | 0.001539 | 0 |
| chr10 | 1.29E+08 | 1.3E+08  | 433 | 582 | 1.29E+08 | -0.23069 | 0.001998 | 0 |
| chr10 | 1.3E+08  | 1.3E+08  | 464 | 623 | 1.30E+08 | -0.22914 | 0.002121 | 0 |
| chr10 | 1.32E+08 | 1.33E+08 | 561 | 563 | 1.33E+08 | 0.190829 | 0.008005 | 0 |
| chr10 | 1.33E+08 | 1.33E+08 | 501 | 666 | 1.33E+08 | -0.21475 | 0.003654 | 0 |
| chr10 | 1.33E+08 | 1.33E+08 | 656 | 630 | 1.33E+08 | 0.254307 | 0.000674 | 0 |
| chr10 | 1.33E+08 | 1.33E+08 | 665 | 651 | 1.33E+08 | 0.22666  | 0.002124 | 0 |
| chr10 | 1.34E+08 | 1.34E+08 | 525 | 502 | 1.34E+08 | 0.260593 | 0.000511 | 0 |
| chr10 | 1.34E+08 | 1.34E+08 | 697 | 672 | 1.34E+08 | 0.24866  | 0.000859 | 0 |
| chr10 | 1.34E+08 | 1.34E+08 | 817 | 757 | 1.34E+08 | 0.306006 | 5.88E-05 | 0 |
| chr10 | 1.34E+08 | 1.34E+08 | 889 | 837 | 1.34E+08 | 0.282919 | 0.000183 | 0 |
| chr10 | 1.34E+08 | 1.34E+08 | 878 | 878 | 1.34E+08 | 0.195963 | 0.006694 | 0 |
| chr10 | 1.35E+08 | 1.35E+08 | 733 | 725 | 1.35E+08 | 0.211795 | 0.003766 | 0 |

|       |          |          |      |      |          |          |          |   |
|-------|----------|----------|------|------|----------|----------|----------|---|
| chr10 | 1.35E+08 | 1.35E+08 | 741  | 706  | 1.35E+08 | 0.265768 | 0.000405 | 0 |
| chr10 | 1.35E+08 | 1.35E+08 | 832  | 819  | 1.35E+08 | 0.218683 | 0.0029   | 0 |
| chr10 | 1.35E+08 | 1.35E+08 | 710  | 681  | 1.35E+08 | 0.256127 | 0.000622 | 0 |
| chr10 | 1.35E+08 | 1.35E+08 | 635  | 621  | 1.35E+08 | 0.228126 | 0.002004 | 0 |
| chr10 | 1.35E+08 | 1.35E+08 | 413  | 541  | 1.35E+08 | -0.19352 | 0.007747 | 0 |
| chr10 | 1.35E+08 | 1.36E+08 | 109  | 109  | 1.36E+08 | 0.195963 | 0.006694 | 0 |
| chr10 | 1.36E+08 | 1.36E+08 | 69   | 69   | 1.36E+08 | 0.195963 | 0.006694 | 0 |
| chr10 | 100001   | 200000   | 640  | 668  | 150000   | 0.134187 | 0.045076 | 0 |
| chr10 | 900001   | 1000000  | 927  | 960  | 950000   | 0.145498 | 0.03308  | 0 |
| chr10 | 1050001  | 1150000  | 948  | 968  | 1100000  | 0.165843 | 0.018133 | 0 |
| chr10 | 1150001  | 1250000  | 1039 | 1083 | 1200000  | 0.136125 | 0.042802 | 0 |
| chr10 | 1350001  | 1450000  | 982  | 1027 | 1400000  | 0.131322 | 0.048616 | 0 |
| chr10 | 1500001  | 1600000  | 985  | 1013 | 1550000  | 0.155524 | 0.024775 | 0 |
| chr10 | 1550001  | 1650000  | 982  | 1010 | 1600000  | 0.155403 | 0.024864 | 0 |
| chr10 | 3000001  | 3100000  | 824  | 1045 | 3050000  | -0.14682 | 0.032784 | 0 |
| chr10 | 3150001  | 3250000  | 1021 | 1059 | 3200000  | 0.143243 | 0.035234 | 0 |
| chr10 | 4500001  | 4600000  | 767  | 970  | 4550000  | -0.1428  | 0.036629 | 0 |
| chr10 | 4550001  | 4650000  | 728  | 929  | 4600000  | -0.15578 | 0.025426 | 0 |
| chr10 | 5650001  | 5750000  | 1063 | 1111 | 5700000  | 0.132246 | 0.047451 | 0 |
| chr10 | 5800001  | 5900000  | 834  | 866  | 5850000  | 0.141643 | 0.036831 | 0 |
| chr10 | 5950001  | 6050000  | 1025 | 1042 | 6.00E+06 | 0.172232 | 0.014835 | 0 |
| chr10 | 6150001  | 6250000  | 974  | 1010 | 6200000  | 0.143601 | 0.034884 | 0 |
| chr10 | 6850001  | 6950000  | 643  | 827  | 6900000  | -0.16711 | 0.018156 | 0 |
| chr10 | 6950001  | 7050000  | 721  | 934  | 7.00E+06 | -0.17746 | 0.013148 | 0 |
| chr10 | 8700001  | 8800000  | 647  | 828  | 8750000  | -0.1599  | 0.022536 | 0 |
| chr10 | 8750001  | 8850000  | 628  | 804  | 8800000  | -0.16047 | 0.022162 | 0 |
| chr10 | 9100001  | 9200000  | 620  | 806  | 9150000  | -0.18255 | 0.011161 | 0 |
| chr10 | 9150001  | 9250000  | 631  | 815  | 9200000  | -0.1732  | 0.015042 | 0 |
| chr10 | 9200001  | 9300000  | 645  | 834  | 9250000  | -0.17479 | 0.014311 | 0 |
| chr10 | 9350001  | 9450000  | 661  | 834  | 9400000  | -0.13943 | 0.040115 | 0 |
| chr10 | 9400001  | 9500000  | 643  | 822  | 9450000  | -0.15836 | 0.023585 | 0 |
| chr10 | 9500001  | 9600000  | 529  | 689  | 9550000  | -0.18527 | 0.010209 | 0 |
| chr10 | 9550001  | 9650000  | 555  | 697  | 9600000  | -0.13271 | 0.047904 | 0 |
| chr10 | 10000001 | 10100000 | 593  | 750  | 10050000 | -0.1429  | 0.036529 | 0 |
| chr10 | 10100001 | 10200000 | 597  | 758  | 10150000 | -0.1485  | 0.031283 | 0 |
| chr10 | 10550001 | 10650000 | 674  | 877  | 10600000 | -0.18387 | 0.010692 | 0 |
| chr10 | 12200001 | 12300000 | 924  | 965  | 12250000 | 0.133327 | 0.046116 | 0 |
| chr10 | 12750001 | 12850000 | 932  | 943  | 12800000 | 0.179035 | 0.011905 | 0 |
| chr10 | 13100001 | 13200000 | 823  | 849  | 13150000 | 0.151091 | 0.028202 | 0 |
| chr10 | 13150001 | 13250000 | 905  | 915  | 13200000 | 0.180109 | 0.011492 | 0 |
| chr10 | 13350001 | 13450000 | 834  | 857  | 13400000 | 0.156715 | 0.023917 | 0 |
| chr10 | 13400001 | 13500000 | 860  | 895  | 13450000 | 0.138412 | 0.040239 | 0 |
| chr10 | 14850001 | 14950000 | 914  | 948  | 14900000 | 0.14327  | 0.035207 | 0 |
| chr10 | 15150001 | 15250000 | 866  | 905  | 15200000 | 0.132412 | 0.047243 | 0 |
| chr10 | 15200001 | 15300000 | 860  | 875  | 15250000 | 0.171017 | 0.015419 | 0 |
| chr10 | 15800001 | 15900000 | 837  | 866  | 15850000 | 0.146824 | 0.031865 | 0 |
| chr10 | 15850001 | 15950000 | 800  | 819  | 15900000 | 0.1621   | 0.020342 | 0 |

|       |          |          |     |      |          |          |          |   |
|-------|----------|----------|-----|------|----------|----------|----------|---|
| chr10 | 16550001 | 16650000 | 696 | 884  | 16600000 | -0.149   | 0.030854 | 0 |
| chr10 | 16650001 | 16750000 | 704 | 894  | 16700000 | -0.14874 | 0.031079 | 0 |
| chr10 | 17150001 | 17250000 | 845 | 881  | 17200000 | 0.135772 | 0.043209 | 0 |
| chr10 | 18250001 | 18350000 | 758 | 777  | 18300000 | 0.160246 | 0.021517 | 0 |
| chr10 | 18550001 | 18650000 | 692 | 885  | 18600000 | -0.15894 | 0.023183 | 0 |
| chr10 | 18600001 | 18700000 | 697 | 878  | 18650000 | -0.1371  | 0.042692 | 0 |
| chr10 | 19050001 | 19150000 | 703 | 891  | 19100000 | -0.14594 | 0.0336   | 0 |
| chr10 | 19100001 | 19200000 | 679 | 874  | 19150000 | -0.16826 | 0.017527 | 0 |
| chr10 | 19150001 | 19250000 | 643 | 833  | 19200000 | -0.17753 | 0.013117 | 0 |
| chr10 | 19650001 | 19750000 | 594 | 763  | 19700000 | -0.16526 | 0.019204 | 0 |
| chr10 | 19700001 | 19800000 | 575 | 734  | 19750000 | -0.15626 | 0.025076 | 0 |
| chr10 | 19850001 | 19950000 | 581 | 740  | 19900000 | -0.15302 | 0.027524 | 0 |
| chr10 | 20350001 | 20450000 | 605 | 761  | 20400000 | -0.135   | 0.045125 | 0 |
| chr10 | 21350001 | 21450000 | 716 | 904  | 21400000 | -0.1404  | 0.039086 | 0 |
| chr10 | 21850001 | 21950000 | 642 | 817  | 21900000 | -0.1518  | 0.028503 | 0 |
| chr10 | 22050001 | 22150000 | 636 | 806  | 22100000 | -0.14579 | 0.033737 | 0 |
| chr10 | 22100001 | 22200000 | 634 | 810  | 22150000 | -0.15748 | 0.0242   | 0 |
| chr10 | 23250001 | 23350000 | 743 | 938  | 23300000 | -0.14026 | 0.039231 | 0 |
| chr10 | 23300001 | 23400000 | 777 | 977  | 23350000 | -0.13448 | 0.045741 | 0 |
| chr10 | 23800001 | 23900000 | 618 | 777  | 23850000 | -0.13434 | 0.045904 | 0 |
| chr10 | 23850001 | 23950000 | 614 | 792  | 23900000 | -0.1713  | 0.015959 | 0 |
| chr10 | 23900001 | 24000000 | 647 | 821  | 23950000 | -0.14765 | 0.032035 | 0 |
| chr10 | 24300001 | 24400000 | 638 | 821  | 24350000 | -0.16786 | 0.017741 | 0 |
| chr10 | 26100001 | 26200000 | 694 | 871  | 26150000 | -0.13177 | 0.049075 | 0 |
| chr10 | 26250001 | 26350000 | 619 | 779  | 26300000 | -0.13572 | 0.044276 | 0 |
| chr10 | 27350001 | 27450000 | 832 | 864  | 27400000 | 0.141515 | 0.036962 | 0 |
| chr10 | 28050001 | 28150000 | 796 | 1012 | 28100000 | -0.15041 | 0.029652 | 0 |
| chr10 | 28100001 | 28200000 | 675 | 867  | 28150000 | -0.16518 | 0.019248 | 0 |
| chr10 | 28300001 | 28400000 | 796 | 1035 | 28350000 | -0.18283 | 0.01106  | 0 |
| chr10 | 28350001 | 28450000 | 771 | 980  | 28400000 | -0.15009 | 0.02992  | 0 |
| chr10 | 28600001 | 28700000 | 752 | 949  | 28650000 | -0.13971 | 0.039816 | 0 |
| chr10 | 28800001 | 28900000 | 924 | 939  | 28850000 | 0.172731 | 0.014601 | 0 |
| chr10 | 29950001 | 30050000 | 892 | 933  | 3.00E+07 | 0.13113  | 0.048861 | 0 |
| chr10 | 30850001 | 30950000 | 612 | 795  | 30900000 | -0.18146 | 0.011563 | 0 |
| chr10 | 31600001 | 31700000 | 827 | 856  | 31650000 | 0.14624  | 0.032395 | 0 |
| chr10 | 32750001 | 32850000 | 620 | 797  | 32800000 | -0.16635 | 0.018579 | 0 |
| chr10 | 33150001 | 33250000 | 900 | 916  | 33200000 | 0.17054  | 0.015654 | 0 |
| chr10 | 33650001 | 33750000 | 764 | 993  | 33700000 | -0.18226 | 0.011267 | 0 |
| chr10 | 33700001 | 33800000 | 720 | 932  | 33750000 | -0.17637 | 0.013611 | 0 |
| chr10 | 33950001 | 34050000 | 701 | 888  | 3.40E+07 | -0.14518 | 0.034309 | 0 |
| chr10 | 34000001 | 34100000 | 723 | 939  | 34050000 | -0.18117 | 0.011673 | 0 |
| chr10 | 34100001 | 34200000 | 646 | 834  | 34150000 | -0.17255 | 0.015349 | 0 |
| chr10 | 34150001 | 34250000 | 689 | 883  | 34200000 | -0.16195 | 0.02121  | 0 |
| chr10 | 34200001 | 34300000 | 691 | 882  | 34250000 | -0.15613 | 0.025168 | 0 |
| chr10 | 36500001 | 36600000 | 617 | 802  | 36550000 | -0.18237 | 0.011227 | 0 |
| chr10 | 37050001 | 37150000 | 559 | 717  | 37100000 | -0.16316 | 0.020454 | 0 |
| chr10 | 37100001 | 37200000 | 483 | 621  | 37150000 | -0.16661 | 0.018434 | 0 |



|       |          |          |      |      |          |          |          |   |
|-------|----------|----------|------|------|----------|----------|----------|---|
| chr10 | 37600001 | 37700000 | 531  | 677  | 37650000 | -0.15448 | 0.026397 | 0 |
| chr10 | 37750001 | 37850000 | 518  | 668  | 37800000 | -0.17093 | 0.016141 | 0 |
| chr10 | 38200001 | 38300000 | 611  | 796  | 38250000 | -0.18563 | 0.010089 | 0 |
| chr10 | 38850001 | 38950000 | 265  | 337  | 38900000 | -0.15079 | 0.029329 | 0 |
| chr10 | 44950001 | 45050000 | 634  | 797  | 4.50E+07 | -0.13413 | 0.046158 | 0 |
| chr10 | 45100001 | 45200000 | 706  | 886  | 45150000 | -0.13168 | 0.0492   | 0 |
| chr10 | 45200001 | 45300000 | 770  | 967  | 45250000 | -0.13269 | 0.04792  | 0 |
| chr10 | 49800001 | 49900000 | 987  | 1030 | 49850000 | 0.134441 | 0.044773 | 0 |
| chr10 | 52500001 | 52600000 | 505  | 642  | 52550000 | -0.15033 | 0.029718 | 0 |
| chr10 | 52650001 | 52750000 | 911  | 1162 | 52700000 | -0.15512 | 0.025911 | 0 |
| chr10 | 53250001 | 53350000 | 817  | 1029 | 53300000 | -0.13687 | 0.04295  | 0 |
| chr10 | 53300001 | 53400000 | 818  | 1042 | 53350000 | -0.15322 | 0.027371 | 0 |
| chr10 | 53600001 | 53700000 | 869  | 1123 | 53650000 | -0.17397 | 0.014684 | 0 |
| chr10 | 53700001 | 53800000 | 746  | 944  | 53750000 | -0.14365 | 0.035786 | 0 |
| chr10 | 53900001 | 54000000 | 888  | 1128 | 53950000 | -0.14917 | 0.030701 | 0 |
| chr10 | 54250001 | 54350000 | 975  | 1232 | 54300000 | -0.14157 | 0.037875 | 0 |
| chr10 | 54300001 | 54400000 | 994  | 1248 | 54350000 | -0.13234 | 0.048366 | 0 |
| chr10 | 54500001 | 54600000 | 948  | 1192 | 54550000 | -0.13446 | 0.045763 | 0 |
| chr10 | 54600001 | 54700000 | 837  | 1082 | 54650000 | -0.17444 | 0.014468 | 0 |
| chr10 | 54800001 | 54900000 | 821  | 1041 | 54850000 | -0.14655 | 0.033032 | 0 |
| chr10 | 54850001 | 54950000 | 782  | 989  | 54900000 | -0.14284 | 0.036586 | 0 |
| chr10 | 55000001 | 55100000 | 749  | 961  | 55050000 | -0.16361 | 0.020182 | 0 |
| chr10 | 55050001 | 55150000 | 676  | 856  | 55100000 | -0.14462 | 0.03484  | 0 |
| chr10 | 55500001 | 55600000 | 721  | 930  | 55550000 | -0.17127 | 0.015974 | 0 |
| chr10 | 55750001 | 55850000 | 768  | 966  | 55800000 | -0.13495 | 0.045177 | 0 |
| chr10 | 55800001 | 55900000 | 795  | 1002 | 55850000 | -0.13789 | 0.041802 | 0 |
| chr10 | 55850001 | 55950000 | 740  | 942  | 55900000 | -0.15224 | 0.028149 | 0 |
| chr10 | 55950001 | 56050000 | 709  | 893  | 5.60E+07 | -0.13691 | 0.042905 | 0 |
| chr10 | 56100001 | 56200000 | 567  | 721  | 56150000 | -0.15069 | 0.029417 | 0 |
| chr10 | 56450001 | 56550000 | 761  | 983  | 56500000 | -0.17333 | 0.014979 | 0 |
| chr10 | 56800001 | 56900000 | 749  | 943  | 56850000 | -0.13633 | 0.043571 | 0 |
| chr10 | 56950001 | 57050000 | 751  | 953  | 5.70E+07 | -0.1477  | 0.031993 | 0 |
| chr10 | 57350001 | 57450000 | 552  | 718  | 57400000 | -0.18335 | 0.010873 | 0 |
| chr10 | 57400001 | 57500000 | 706  | 906  | 57450000 | -0.16388 | 0.020018 | 0 |
| chr10 | 57450001 | 57550000 | 609  | 783  | 57500000 | -0.16661 | 0.018434 | 0 |
| chr10 | 57550001 | 57650000 | 705  | 897  | 57600000 | -0.15152 | 0.028729 | 0 |
| chr10 | 57850001 | 57950000 | 709  | 900  | 57900000 | -0.14818 | 0.031571 | 0 |
| chr10 | 58600001 | 58700000 | 824  | 1054 | 58650000 | -0.1592  | 0.023011 | 0 |
| chr10 | 59000001 | 59100000 | 765  | 996  | 59050000 | -0.18472 | 0.010396 | 0 |
| chr10 | 59050001 | 59150000 | 795  | 1008 | 59100000 | -0.14651 | 0.033075 | 0 |
| chr10 | 59400001 | 59500000 | 724  | 929  | 59450000 | -0.16373 | 0.020111 | 0 |
| chr10 | 59550001 | 59650000 | 749  | 943  | 59600000 | -0.13633 | 0.043571 | 0 |
| chr10 | 60100001 | 60200000 | 1070 | 1104 | 60150000 | 0.150834 | 0.028412 | 0 |
| chr10 | 60800001 | 60900000 | 681  | 879  | 60850000 | -0.17225 | 0.015496 | 0 |
| chr10 | 62000001 | 62100000 | 684  | 859  | 62050000 | -0.1327  | 0.047915 | 0 |
| chr10 | 62350001 | 62450000 | 715  | 898  | 62400000 | -0.13281 | 0.047778 | 0 |
| chr10 | 63250001 | 63350000 | 717  | 932  | 63300000 | -0.18239 | 0.011217 | 0 |

|       |          |          |      |      |          |          |          |   |
|-------|----------|----------|------|------|----------|----------|----------|---|
| chr10 | 63400001 | 63500000 | 736  | 935  | 63450000 | -0.1493  | 0.030593 | 0 |
| chr10 | 63850001 | 63950000 | 733  | 941  | 63900000 | -0.16442 | 0.019696 | 0 |
| chr10 | 63900001 | 64000000 | 745  | 967  | 63950000 | -0.18031 | 0.011999 | 0 |
| chr10 | 64200001 | 64300000 | 781  | 987  | 64250000 | -0.14176 | 0.037671 | 0 |
| chr10 | 65200001 | 65300000 | 949  | 969  | 65250000 | 0.165874 | 0.018115 | 0 |
| chr10 | 65550001 | 65650000 | 669  | 846  | 65600000 | -0.14269 | 0.036736 | 0 |
| chr10 | 65700001 | 65800000 | 648  | 819  | 65750000 | -0.14191 | 0.037526 | 0 |
| chr10 | 66250001 | 66350000 | 590  | 753  | 66300000 | -0.15597 | 0.025283 | 0 |
| chr10 | 66300001 | 66400000 | 607  | 771  | 66350000 | -0.14907 | 0.030788 | 0 |
| chr10 | 66700001 | 66800000 | 614  | 787  | 66750000 | -0.16216 | 0.021075 | 0 |
| chr10 | 66950001 | 67050000 | 592  | 755  | 6.70E+07 | -0.15492 | 0.026067 | 0 |
| chr10 | 67050001 | 67150000 | 584  | 746  | 67100000 | -0.15724 | 0.024365 | 0 |
| chr10 | 67100001 | 67200000 | 602  | 765  | 67150000 | -0.14973 | 0.03022  | 0 |
| chr10 | 67200001 | 67300000 | 560  | 707  | 67250000 | -0.14032 | 0.03917  | 0 |
| chr10 | 67250001 | 67350000 | 582  | 753  | 67300000 | -0.17567 | 0.013918 | 0 |
| chr10 | 67400001 | 67500000 | 571  | 743  | 67450000 | -0.18391 | 0.010677 | 0 |
| chr10 | 67650001 | 67750000 | 612  | 770  | 67700000 | -0.13536 | 0.044694 | 0 |
| chr10 | 67700001 | 67800000 | 588  | 748  | 67750000 | -0.15126 | 0.028944 | 0 |
| chr10 | 68600001 | 68700000 | 660  | 842  | 68650000 | -0.15539 | 0.025712 | 0 |
| chr10 | 68700001 | 68800000 | 685  | 872  | 68750000 | -0.15226 | 0.028131 | 0 |
| chr10 | 68750001 | 68850000 | 696  | 886  | 68800000 | -0.15226 | 0.028134 | 0 |
| chr10 | 69200001 | 69300000 | 619  | 799  | 69250000 | -0.17229 | 0.015473 | 0 |
| chr10 | 69750001 | 69850000 | 884  | 901  | 69800000 | 0.168482 | 0.016702 | 0 |
| chr10 | 69900001 | 70000000 | 958  | 990  | 69950000 | 0.14856  | 0.030329 | 0 |
| chr10 | 70100001 | 70200000 | 812  | 847  | 70150000 | 0.135081 | 0.044016 | 0 |
| chr10 | 70150001 | 70250000 | 789  | 799  | 70200000 | 0.177793 | 0.012399 | 0 |
| chr10 | 70700001 | 70800000 | 878  | 909  | 70750000 | 0.145904 | 0.032704 | 0 |
| chr10 | 71350001 | 71450000 | 1084 | 1123 | 71400000 | 0.14497  | 0.033574 | 0 |
| chr10 | 71500001 | 71600000 | 1119 | 1171 | 71550000 | 0.130432 | 0.049759 | 0 |
| chr10 | 71900001 | 72000000 | 904  | 926  | 71950000 | 0.161274 | 0.020859 | 0 |
| chr10 | 72050001 | 72150000 | 1025 | 1054 | 72100000 | 0.155712 | 0.024638 | 0 |
| chr10 | 72350001 | 72450000 | 833  | 848  | 72400000 | 0.170215 | 0.015815 | 0 |
| chr10 | 72600001 | 72700000 | 1040 | 1082 | 72650000 | 0.138846 | 0.039767 | 0 |
| chr10 | 72950001 | 73050000 | 1140 | 1191 | 7.30E+07 | 0.132823 | 0.046734 | 0 |
| chr10 | 73000001 | 73100000 | 1131 | 1149 | 73050000 | 0.173183 | 0.014392 | 0 |
| chr10 | 73050001 | 73150000 | 1103 | 1118 | 73100000 | 0.176476 | 0.012943 | 0 |
| chr10 | 73950001 | 74050000 | 848  | 872  | 7.40E+07 | 0.155699 | 0.024647 | 0 |
| chr10 | 74250001 | 74350000 | 861  | 888  | 74300000 | 0.151417 | 0.027937 | 0 |
| chr10 | 74750001 | 74850000 | 795  | 826  | 74800000 | 0.140776 | 0.037722 | 0 |
| chr10 | 75100001 | 75200000 | 858  | 894  | 75150000 | 0.136666 | 0.042184 | 0 |
| chr10 | 75700001 | 75800000 | 855  | 884  | 75750000 | 0.147841 | 0.030957 | 0 |
| chr10 | 75850001 | 75950000 | 938  | 971  | 75900000 | 0.14608  | 0.032542 | 0 |
| chr10 | 75900001 | 76000000 | 850  | 889  | 75950000 | 0.131242 | 0.048717 | 0 |
| chr10 | 76850001 | 76950000 | 860  | 874  | 76900000 | 0.172666 | 0.014631 | 0 |
| chr10 | 77500001 | 77600000 | 707  | 893  | 77550000 | -0.14099 | 0.038472 | 0 |
| chr10 | 77700001 | 77800000 | 764  | 971  | 77750000 | -0.14994 | 0.030048 | 0 |
| chr10 | 78350001 | 78450000 | 598  | 759  | 78400000 | -0.14799 | 0.031734 | 0 |

|       |          |          |      |      |          |          |          |   |
|-------|----------|----------|------|------|----------|----------|----------|---|
| chr10 | 78400001 | 78500000 | 696  | 885  | 78450000 | -0.15063 | 0.029467 | 0 |
| chr10 | 78450001 | 78550000 | 701  | 894  | 78500000 | -0.1549  | 0.026082 | 0 |
| chr10 | 78500001 | 78600000 | 642  | 820  | 78550000 | -0.15709 | 0.024476 | 0 |
| chr10 | 78550001 | 78650000 | 607  | 763  | 78600000 | -0.13402 | 0.046291 | 0 |
| chr10 | 79600001 | 79700000 | 1029 | 1074 | 79650000 | 0.134212 | 0.045046 | 0 |
| chr10 | 79850001 | 79950000 | 808  | 1016 | 79900000 | -0.13451 | 0.045706 | 0 |
| chr10 | 80600001 | 80700000 | 1099 | 1134 | 80650000 | 0.150734 | 0.028494 | 0 |
| chr10 | 80650001 | 80750000 | 1160 | 1198 | 80700000 | 0.14946  | 0.029558 | 0 |
| chr10 | 80850001 | 80950000 | 1248 | 1267 | 80900000 | 0.174164 | 0.013946 | 0 |
| chr10 | 80900001 | 81000000 | 1184 | 1199 | 80950000 | 0.1778   | 0.012396 | 0 |
| chr10 | 82450001 | 82550000 | 699  | 904  | 82500000 | -0.17507 | 0.014184 | 0 |
| chr10 | 82650001 | 82750000 | 661  | 861  | 82700000 | -0.1854  | 0.010167 | 0 |
| chr10 | 82700001 | 82800000 | 622  | 796  | 82750000 | -0.15989 | 0.022544 | 0 |
| chr10 | 83150001 | 83250000 | 675  | 854  | 83200000 | -0.14339 | 0.036044 | 0 |
| chr10 | 83200001 | 83300000 | 669  | 863  | 83250000 | -0.17139 | 0.015913 | 0 |
| chr10 | 83700001 | 83800000 | 613  | 794  | 83750000 | -0.17729 | 0.01322  | 0 |
| chr10 | 83850001 | 83950000 | 670  | 845  | 83900000 | -0.13883 | 0.040772 | 0 |
| chr10 | 84050001 | 84150000 | 633  | 806  | 84100000 | -0.15261 | 0.027851 | 0 |
| chr10 | 84300001 | 84400000 | 639  | 817  | 84350000 | -0.15856 | 0.023446 | 0 |
| chr10 | 84350001 | 84450000 | 633  | 796  | 84400000 | -0.1346  | 0.045599 | 0 |
| chr10 | 84650001 | 84750000 | 629  | 801  | 84700000 | -0.15278 | 0.027718 | 0 |
| chr10 | 86450001 | 86550000 | 581  | 753  | 86500000 | -0.17815 | 0.012862 | 0 |
| chr10 | 86600001 | 86700000 | 691  | 886  | 86650000 | -0.16266 | 0.020765 | 0 |
| chr10 | 86650001 | 86750000 | 664  | 833  | 86700000 | -0.13117 | 0.049845 | 0 |
| chr10 | 86700001 | 86800000 | 606  | 775  | 86750000 | -0.15892 | 0.023201 | 0 |
| chr10 | 86750001 | 86850000 | 619  | 792  | 86800000 | -0.1596  | 0.022739 | 0 |
| chr10 | 86900001 | 87000000 | 666  | 843  | 86950000 | -0.14405 | 0.035396 | 0 |
| chr10 | 87050001 | 87150000 | 586  | 739  | 87100000 | -0.13871 | 0.040899 | 0 |
| chr10 | 87350001 | 87450000 | 766  | 972  | 87400000 | -0.14765 | 0.032039 | 0 |
| chr10 | 88100001 | 88200000 | 990  | 1028 | 88150000 | 0.141623 | 0.036852 | 0 |
| chr10 | 88950001 | 89050000 | 44   | 56   | 8.90E+07 | -0.15196 | 0.028373 | 0 |
| chr10 | 89100001 | 89200000 | 40   | 51   | 89150000 | -0.15453 | 0.026356 | 0 |
| chr10 | 89150001 | 89250000 | 24   | 31   | 89200000 | -0.17327 | 0.015008 | 0 |
| chr10 | 89300001 | 89400000 | 797  | 1024 | 89350000 | -0.1656  | 0.019005 | 0 |
| chr10 | 89550001 | 89650000 | 921  | 954  | 89600000 | 0.145175 | 0.033381 | 0 |
| chr10 | 90450001 | 90550000 | 754  | 948  | 90500000 | -0.13436 | 0.045886 | 0 |
| chr10 | 91550001 | 91650000 | 733  | 935  | 91600000 | -0.15519 | 0.025862 | 0 |
| chr10 | 91600001 | 91700000 | 698  | 892  | 91650000 | -0.15785 | 0.023935 | 0 |
| chr10 | 92050001 | 92150000 | 606  | 767  | 92100000 | -0.14395 | 0.035495 | 0 |
| chr10 | 92450001 | 92550000 | 720  | 932  | 92500000 | -0.17637 | 0.013611 | 0 |
| chr10 | 92700001 | 92800000 | 948  | 1194 | 92750000 | -0.13688 | 0.04294  | 0 |
| chr10 | 93500001 | 93600000 | 837  | 872  | 93550000 | 0.136863 | 0.041961 | 0 |
| chr10 | 93650001 | 93750000 | 942  | 958  | 93700000 | 0.171664 | 0.015106 | 0 |
| chr10 | 94350001 | 94450000 | 791  | 817  | 94400000 | 0.149305 | 0.02969  | 0 |
| chr10 | 94500001 | 94600000 | 870  | 897  | 94550000 | 0.15187  | 0.027572 | 0 |
| chr10 | 95150001 | 95250000 | 926  | 936  | 95200000 | 0.180467 | 0.011357 | 0 |
| chr10 | 96050001 | 96150000 | 841  | 876  | 96100000 | 0.137138 | 0.041651 | 0 |

|       |          |          |      |      |          |          |          |   |
|-------|----------|----------|------|------|----------|----------|----------|---|
| chr10 | 96550001 | 96650000 | 449  | 579  | 96600000 | -0.17088 | 0.016165 | 0 |
| chr10 | 96600001 | 96700000 | 533  | 691  | 96650000 | -0.17859 | 0.012683 | 0 |
| chr10 | 96700001 | 96800000 | 505  | 648  | 96750000 | -0.16375 | 0.020098 | 0 |
| chr10 | 97150001 | 97250000 | 948  | 984  | 97200000 | 0.142192 | 0.036277 | 0 |
| chr10 | 97950001 | 98050000 | 819  | 1035 | 9.80E+07 | -0.14173 | 0.037704 | 0 |
| chr10 | 98200001 | 98300000 | 907  | 933  | 98250000 | 0.155189 | 0.025022 | 0 |
| chr10 | 98250001 | 98350000 | 882  | 913  | 98300000 | 0.146127 | 0.032499 | 0 |
| chr10 | 98550001 | 98650000 | 907  | 924  | 98600000 | 0.169173 | 0.016344 | 0 |
| chr10 | 99000001 | 99100000 | 829  | 846  | 99050000 | 0.166677 | 0.017669 | 0 |
| chr10 | 99150001 | 99250000 | 944  | 983  | 99200000 | 0.137558 | 0.04118  | 0 |
| chr10 | 99200001 | 99300000 | 1056 | 1084 | 99250000 | 0.158208 | 0.022876 | 0 |
| chr10 | 99500001 | 99600000 | 974  | 990  | 99550000 | 0.172456 | 0.01473  | 0 |
| chr10 | 1.01E+08 | 1.01E+08 | 460  | 578  | 1.01E+08 | -0.13347 | 0.046961 | 0 |
| chr10 | 1.01E+08 | 1.01E+08 | 358  | 457  | 1.01E+08 | -0.15627 | 0.025064 | 0 |
| chr10 | 1.01E+08 | 1.01E+08 | 652  | 675  | 1.01E+08 | 0.145947 | 0.032663 | 0 |
| chr10 | 1.01E+08 | 1.01E+08 | 635  | 663  | 1.01E+08 | 0.133711 | 0.04565  | 0 |
| chr10 | 1.01E+08 | 1.01E+08 | 620  | 628  | 1.01E+08 | 0.177467 | 0.012532 | 0 |
| chr10 | 1.02E+08 | 1.02E+08 | 601  | 606  | 1.02E+08 | 0.18401  | 0.010094 | 0 |
| chr10 | 1.02E+08 | 1.02E+08 | 571  | 584  | 1.02E+08 | 0.163485 | 0.019499 | 0 |
| chr10 | 1.02E+08 | 1.02E+08 | 522  | 532  | 1.02E+08 | 0.168587 | 0.016647 | 0 |
| chr10 | 1.03E+08 | 1.03E+08 | 803  | 825  | 1.03E+08 | 0.156969 | 0.023737 | 0 |
| chr10 | 1.03E+08 | 1.03E+08 | 780  | 810  | 1.03E+08 | 0.141515 | 0.036962 | 0 |
| chr10 | 1.03E+08 | 1.03E+08 | 695  | 704  | 1.03E+08 | 0.177401 | 0.012559 | 0 |
| chr10 | 1.03E+08 | 1.03E+08 | 584  | 606  | 1.03E+08 | 0.142614 | 0.035856 | 0 |
| chr10 | 1.04E+08 | 1.04E+08 | 708  | 724  | 1.04E+08 | 0.163723 | 0.019357 | 0 |
| chr10 | 1.04E+08 | 1.04E+08 | 669  | 691  | 1.04E+08 | 0.149284 | 0.029708 | 0 |
| chr10 | 1.04E+08 | 1.04E+08 | 725  | 746  | 1.04E+08 | 0.154768 | 0.025333 | 0 |
| chr10 | 1.04E+08 | 1.04E+08 | 659  | 685  | 1.04E+08 | 0.140138 | 0.038389 | 0 |
| chr10 | 1.05E+08 | 1.05E+08 | 626  | 649  | 1.05E+08 | 0.143907 | 0.034588 | 0 |
| chr10 | 1.06E+08 | 1.06E+08 | 474  | 607  | 1.06E+08 | -0.16085 | 0.021915 | 0 |
| chr10 | 1.06E+08 | 1.06E+08 | 523  | 660  | 1.06E+08 | -0.13969 | 0.039838 | 0 |
| chr10 | 1.07E+08 | 1.07E+08 | 513  | 662  | 1.07E+08 | -0.17191 | 0.015659 | 0 |
| chr10 | 1.07E+08 | 1.07E+08 | 491  | 629  | 1.07E+08 | -0.16137 | 0.021575 | 0 |
| chr10 | 1.08E+08 | 1.08E+08 | 412  | 517  | 1.08E+08 | -0.13156 | 0.049351 | 0 |
| chr10 | 1.08E+08 | 1.09E+08 | 424  | 544  | 1.09E+08 | -0.16358 | 0.0202   | 0 |
| chr10 | 1.09E+08 | 1.09E+08 | 421  | 530  | 1.09E+08 | -0.13621 | 0.043709 | 0 |
| chr10 | 1.09E+08 | 1.09E+08 | 423  | 549  | 1.09E+08 | -0.18019 | 0.012049 | 0 |
| chr10 | 1.09E+08 | 1.09E+08 | 418  | 531  | 1.09E+08 | -0.14925 | 0.030638 | 0 |
| chr10 | 1.09E+08 | 1.09E+08 | 411  | 518  | 1.09E+08 | -0.13785 | 0.041848 | 0 |
| chr10 | 1.09E+08 | 1.09E+08 | 390  | 505  | 1.09E+08 | -0.17685 | 0.013407 | 0 |
| chr10 | 1.1E+08  | 1.1E+08  | 370  | 474  | 1.1E+08  | -0.1614  | 0.021559 | 0 |
| chr10 | 1.11E+08 | 1.11E+08 | 410  | 530  | 1.11E+08 | -0.17441 | 0.014483 | 0 |
| chr10 | 1.11E+08 | 1.11E+08 | 406  | 518  | 1.11E+08 | -0.15551 | 0.025624 | 0 |
| chr10 | 1.11E+08 | 1.11E+08 | 439  | 452  | 1.11E+08 | 0.153861 | 0.026017 | 0 |
| chr10 | 1.11E+08 | 1.11E+08 | 386  | 498  | 1.11E+08 | -0.17158 | 0.015819 | 0 |
| chr10 | 1.11E+08 | 1.11E+08 | 360  | 469  | 1.11E+08 | -0.18563 | 0.010091 | 0 |
| chr10 | 1.11E+08 | 1.11E+08 | 340  | 439  | 1.11E+08 | -0.17272 | 0.015267 | 0 |

|       |          |          |     |     |          |          |          |   |
|-------|----------|----------|-----|-----|----------|----------|----------|---|
| chr10 | 1.12E+08 | 1.12E+08 | 405 | 514 | 1.12E+08 | -0.14788 | 0.03183  | 0 |
| chr10 | 1.12E+08 | 1.12E+08 | 516 | 653 | 1.12E+08 | -0.14375 | 0.035687 | 0 |
| chr10 | 1.13E+08 | 1.13E+08 | 577 | 730 | 1.13E+08 | -0.14336 | 0.036067 | 0 |
| chr10 | 1.13E+08 | 1.13E+08 | 551 | 692 | 1.13E+08 | -0.13276 | 0.047843 | 0 |
| chr10 | 1.13E+08 | 1.13E+08 | 562 | 708 | 1.13E+08 | -0.13722 | 0.04256  | 0 |
| chr10 | 1.13E+08 | 1.13E+08 | 519 | 666 | 1.13E+08 | -0.16382 | 0.020051 | 0 |
| chr10 | 1.13E+08 | 1.14E+08 | 456 | 589 | 1.13E+08 | -0.17327 | 0.015008 | 0 |
| chr10 | 1.14E+08 | 1.14E+08 | 488 | 627 | 1.14E+08 | -0.16562 | 0.018994 | 0 |
| chr10 | 1.14E+08 | 1.14E+08 | 634 | 651 | 1.14E+08 | 0.157788 | 0.023165 | 0 |
| chr10 | 1.14E+08 | 1.14E+08 | 539 | 684 | 1.14E+08 | -0.14775 | 0.031951 | 0 |
| chr10 | 1.15E+08 | 1.15E+08 | 716 | 729 | 1.15E+08 | 0.170004 | 0.015921 | 0 |
| chr10 | 1.15E+08 | 1.15E+08 | 563 | 728 | 1.15E+08 | -0.17484 | 0.014286 | 0 |
| chr10 | 1.15E+08 | 1.15E+08 | 563 | 715 | 1.15E+08 | -0.14885 | 0.030984 | 0 |
| chr10 | 1.15E+08 | 1.15E+08 | 664 | 691 | 1.15E+08 | 0.138461 | 0.040186 | 0 |
| chr10 | 1.16E+08 | 1.16E+08 | 542 | 693 | 1.16E+08 | -0.1586  | 0.023417 | 0 |
| chr10 | 1.16E+08 | 1.16E+08 | 528 | 680 | 1.16E+08 | -0.16903 | 0.017115 | 0 |
| chr10 | 1.17E+08 | 1.17E+08 | 385 | 487 | 1.17E+08 | -0.1431  | 0.036326 | 0 |
| chr10 | 1.17E+08 | 1.17E+08 | 392 | 503 | 1.17E+08 | -0.16374 | 0.020101 | 0 |
| chr10 | 1.17E+08 | 1.18E+08 | 417 | 534 | 1.17E+08 | -0.16083 | 0.021926 | 0 |
| chr10 | 1.18E+08 | 1.18E+08 | 509 | 527 | 1.18E+08 | 0.145826 | 0.032776 | 0 |
| chr10 | 1.18E+08 | 1.18E+08 | 524 | 545 | 1.18E+08 | 0.139274 | 0.039306 | 0 |
| chr10 | 1.18E+08 | 1.18E+08 | 471 | 599 | 1.18E+08 | -0.15087 | 0.029269 | 0 |
| chr10 | 1.18E+08 | 1.18E+08 | 482 | 606 | 1.18E+08 | -0.13432 | 0.045932 | 0 |
| chr10 | 1.2E+08  | 1.2E+08  | 550 | 692 | 1.2E+08  | -0.13538 | 0.044678 | 0 |
| chr10 | 1.21E+08 | 1.21E+08 | 523 | 546 | 1.21E+08 | 0.133873 | 0.045454 | 0 |
| chr10 | 1.21E+08 | 1.21E+08 | 732 | 756 | 1.21E+08 | 0.14942  | 0.029591 | 0 |
| chr10 | 1.21E+08 | 1.22E+08 | 619 | 639 | 1.22E+08 | 0.150087 | 0.029031 | 0 |
| chr10 | 1.22E+08 | 1.22E+08 | 646 | 667 | 1.22E+08 | 0.14981  | 0.029262 | 0 |
| chr10 | 1.22E+08 | 1.22E+08 | 603 | 615 | 1.22E+08 | 0.167535 | 0.017204 | 0 |
| chr10 | 1.22E+08 | 1.22E+08 | 523 | 677 | 1.22E+08 | -0.17638 | 0.013606 | 0 |
| chr10 | 1.22E+08 | 1.22E+08 | 495 | 623 | 1.22E+08 | -0.13584 | 0.044136 | 0 |
| chr10 | 1.22E+08 | 1.22E+08 | 490 | 631 | 1.22E+08 | -0.1689  | 0.017188 | 0 |
| chr10 | 1.22E+08 | 1.22E+08 | 553 | 570 | 1.22E+08 | 0.152281 | 0.027246 | 0 |
| chr10 | 1.22E+08 | 1.22E+08 | 467 | 589 | 1.22E+08 | -0.13888 | 0.040712 | 0 |
| chr10 | 1.22E+08 | 1.22E+08 | 496 | 624 | 1.22E+08 | -0.13524 | 0.044836 | 0 |
| chr10 | 1.23E+08 | 1.23E+08 | 572 | 586 | 1.23E+08 | 0.161078 | 0.020983 | 0 |
| chr10 | 1.23E+08 | 1.23E+08 | 524 | 534 | 1.23E+08 | 0.16869  | 0.016593 | 0 |
| chr10 | 1.23E+08 | 1.23E+08 | 594 | 603 | 1.23E+08 | 0.174268 | 0.013899 | 0 |
| chr10 | 1.24E+08 | 1.24E+08 | 590 | 610 | 1.24E+08 | 0.147869 | 0.030933 | 0 |
| chr10 | 1.24E+08 | 1.24E+08 | 547 | 563 | 1.24E+08 | 0.154369 | 0.025633 | 0 |
| chr10 | 1.24E+08 | 1.24E+08 | 688 | 716 | 1.24E+08 | 0.138412 | 0.040239 | 0 |
| chr10 | 1.25E+08 | 1.25E+08 | 576 | 588 | 1.25E+08 | 0.166216 | 0.017925 | 0 |
| chr10 | 1.25E+08 | 1.25E+08 | 515 | 658 | 1.25E+08 | -0.15755 | 0.024147 | 0 |
| chr10 | 1.25E+08 | 1.25E+08 | 636 | 665 | 1.25E+08 | 0.131635 | 0.048218 | 0 |
| chr10 | 1.25E+08 | 1.25E+08 | 656 | 667 | 1.25E+08 | 0.171972 | 0.014959 | 0 |
| chr10 | 1.26E+08 | 1.26E+08 | 712 | 733 | 1.26E+08 | 0.154027 | 0.025891 | 0 |
| chr10 | 1.26E+08 | 1.27E+08 | 646 | 663 | 1.26E+08 | 0.158488 | 0.022685 | 0 |

|       |          |          |     |     |          |          |          |   |
|-------|----------|----------|-----|-----|----------|----------|----------|---|
| chr10 | 1.27E+08 | 1.27E+08 | 605 | 625 | 1.27E+08 | 0.149042 | 0.029914 | 0 |
| chr10 | 1.27E+08 | 1.27E+08 | 529 | 689 | 1.27E+08 | -0.18527 | 0.010209 | 0 |
| chr10 | 1.29E+08 | 1.29E+08 | 356 | 370 | 1.29E+08 | 0.140315 | 0.038202 | 0 |
| chr10 | 1.29E+08 | 1.29E+08 | 495 | 629 | 1.29E+08 | -0.14967 | 0.030276 | 0 |
| chr10 | 1.29E+08 | 1.29E+08 | 515 | 659 | 1.29E+08 | -0.15974 | 0.022642 | 0 |
| chr10 | 1.29E+08 | 1.29E+08 | 468 | 603 | 1.29E+08 | -0.16969 | 0.016775 | 0 |
| chr10 | 1.29E+08 | 1.3E+08  | 410 | 530 | 1.3E+08  | -0.17441 | 0.014483 | 0 |
| chr10 | 1.3E+08  | 1.3E+08  | 487 | 618 | 1.3E+08  | -0.14772 | 0.031974 | 0 |
| chr10 | 1.31E+08 | 1.31E+08 | 453 | 577 | 1.31E+08 | -0.1531  | 0.027467 | 0 |
| chr10 | 1.31E+08 | 1.31E+08 | 483 | 613 | 1.31E+08 | -0.1479  | 0.031815 | 0 |
| chr10 | 1.31E+08 | 1.31E+08 | 510 | 657 | 1.31E+08 | -0.16943 | 0.016906 | 0 |
| chr10 | 1.31E+08 | 1.31E+08 | 493 | 629 | 1.31E+08 | -0.15551 | 0.025624 | 0 |
| chr10 | 1.32E+08 | 1.32E+08 | 589 | 612 | 1.32E+08 | 0.140699 | 0.037802 | 0 |
| chr10 | 1.33E+08 | 1.33E+08 | 594 | 608 | 1.33E+08 | 0.162355 | 0.020184 | 0 |
| chr10 | 1.33E+08 | 1.33E+08 | 537 | 678 | 1.33E+08 | -0.1404  | 0.039086 | 0 |
| chr10 | 1.33E+08 | 1.33E+08 | 536 | 559 | 1.33E+08 | 0.135348 | 0.043703 | 0 |
| chr10 | 1.34E+08 | 1.34E+08 | 654 | 680 | 1.34E+08 | 0.139719 | 0.038831 | 0 |
| chr10 | 1.34E+08 | 1.34E+08 | 773 | 799 | 1.34E+08 | 0.148236 | 0.030611 | 0 |
| chr10 | 1.34E+08 | 1.34E+08 | 767 | 800 | 1.34E+08 | 0.13519  | 0.043888 | 0 |
| chr10 | 1.35E+08 | 1.35E+08 | 795 | 832 | 1.35E+08 | 0.130334 | 0.049886 | 0 |
| chr10 | 1.35E+08 | 1.35E+08 | 714 | 743 | 1.35E+08 | 0.138525 | 0.040115 | 0 |
| chr10 | 1.35E+08 | 1.35E+08 | 744 | 755 | 1.35E+08 | 0.174789 | 0.013668 | 0 |
| chr11 | 50001    | 150000   | 1   | 5   | 1.00E+05 | -2.12597 | 6.56E-79 | 0 |
| chr11 | 200001   | 300000   | 749 | 750 | 250000   | 0.194038 | 0.007161 | 0 |
| chr11 | 250001   | 350000   | 697 | 660 | 3.00E+05 | 0.274656 | 0.00027  | 0 |
| chr11 | 300001   | 400000   | 703 | 684 | 350000   | 0.235491 | 0.00149  | 0 |
| chr11 | 350001   | 450000   | 797 | 758 | 4.00E+05 | 0.268345 | 0.000361 | 0 |
| chr11 | 400001   | 500000   | 774 | 732 | 450000   | 0.276453 | 0.000248 | 0 |
| chr11 | 450001   | 550000   | 734 | 673 | 5.00E+05 | 0.321137 | 2.68E-05 | 0 |
| chr11 | 500001   | 600000   | 753 | 683 | 550000   | 0.336727 | 1.16E-05 | 0 |
| chr11 | 550001   | 650000   | 789 | 744 | 6.00E+05 | 0.280686 | 0.000204 | 0 |
| chr11 | 600001   | 700000   | 695 | 690 | 650000   | 0.20638  | 0.004603 | 0 |
| chr11 | 650001   | 750000   | 651 | 649 | 7.00E+05 | 0.200402 | 0.005717 | 0 |
| chr11 | 700001   | 800000   | 717 | 705 | 750000   | 0.220313 | 0.002723 | 0 |
| chr11 | 750001   | 850000   | 803 | 753 | 8.00E+05 | 0.288713 | 0.000139 | 0 |
| chr11 | 800001   | 900000   | 897 | 805 | 850000   | 0.352082 | 4.89E-06 | 0 |
| chr11 | 850001   | 950000   | 809 | 778 | 9.00E+05 | 0.252333 | 0.000734 | 0 |
| chr11 | 900001   | 1000000  | 695 | 668 | 950000   | 0.253128 | 0.000709 | 0 |
| chr11 | 1200001  | 1300000  | 680 | 668 | 1250000  | 0.22165  | 0.002586 | 0 |
| chr11 | 1250001  | 1350000  | 711 | 687 | 1300000  | 0.245502 | 0.000983 | 0 |
| chr11 | 1300001  | 1400000  | 730 | 707 | 1350000  | 0.242149 | 0.001131 | 0 |
| chr11 | 1350001  | 1450000  | 782 | 778 | 1400000  | 0.203361 | 0.005139 | 0 |
| chr11 | 1450001  | 1550000  | 785 | 780 | 1500000  | 0.205182 | 0.004809 | 0 |
| chr11 | 1500001  | 1600000  | 849 | 794 | 1550000  | 0.292589 | 0.000115 | 0 |
| chr11 | 1550001  | 1650000  | 680 | 662 | 1600000  | 0.234667 | 0.001541 | 0 |
| chr11 | 1600001  | 1700000  | 537 | 532 | 1650000  | 0.209459 | 0.004109 | 0 |
| chr11 | 1650001  | 1750000  | 584 | 554 | 1700000  | 0.272045 | 0.000305 | 0 |

|       |          |          |      |      |          |          |          |   |
|-------|----------|----------|------|------|----------|----------|----------|---|
| chr11 | 1700001  | 1800000  | 720  | 689  | 1750000  | 0.259456 | 0.000538 | 0 |
| chr11 | 1750001  | 1850000  | 793  | 769  | 1800000  | 0.2403   | 0.001222 | 0 |
| chr11 | 1950001  | 2050000  | 834  | 815  | 2.00E+06 | 0.22921  | 0.00192  | 0 |
| chr11 | 2350001  | 2450000  | 771  | 726  | 2400000  | 0.282724 | 0.000185 | 0 |
| chr11 | 2400001  | 2500000  | 863  | 808  | 2450000  | 0.290968 | 0.000124 | 0 |
| chr11 | 2850001  | 2950000  | 1287 | 1246 | 2900000  | 0.242671 | 0.001107 | 0 |
| chr11 | 2900001  | 3000000  | 1656 | 1549 | 2950000  | 0.292329 | 0.000116 | 0 |
| chr11 | 3250001  | 3350000  | 263  | 258  | 3300000  | 0.223655 | 0.002391 | 0 |
| chr11 | 3400001  | 3500000  | 286  | 287  | 3450000  | 0.190927 | 0.007978 | 0 |
| chr11 | 3500001  | 3600000  | 125  | 171  | 3550000  | -0.25611 | 0.000712 | 0 |
| chr11 | 3700001  | 3800000  | 1148 | 1143 | 3750000  | 0.20226  | 0.005348 | 0 |
| chr11 | 3750001  | 3850000  | 1178 | 1159 | 3800000  | 0.219422 | 0.002818 | 0 |
| chr11 | 4300001  | 4400000  | 158  | 213  | 4350000  | -0.23497 | 0.001689 | 0 |
| chr11 | 7200001  | 7300000  | 680  | 897  | 7250000  | -0.20361 | 0.005461 | 0 |
| chr11 | 7300001  | 7400000  | 634  | 836  | 7350000  | -0.20306 | 0.005569 | 0 |
| chr11 | 7350001  | 7450000  | 670  | 906  | 7400000  | -0.23939 | 0.001417 | 0 |
| chr11 | 9350001  | 9450000  | 1057 | 1022 | 9400000  | 0.244543 | 0.001023 | 0 |
| chr11 | 9400001  | 9500000  | 1094 | 1075 | 9450000  | 0.221239 | 0.002627 | 0 |
| chr11 | 10250001 | 10350000 | 996  | 994  | 10300000 | 0.198863 | 0.00604  | 0 |
| chr11 | 15000001 | 15100000 | 449  | 604  | 15050000 | -0.23187 | 0.001908 | 0 |
| chr11 | 15900001 | 16000000 | 464  | 631  | 15950000 | -0.24755 | 0.001017 | 0 |
| chr11 | 17900001 | 18000000 | 612  | 801  | 17950000 | -0.19231 | 0.008074 | 0 |
| chr11 | 18900001 | 19000000 | 462  | 443  | 18950000 | 0.256549 | 0.000611 | 0 |
| chr11 | 19050001 | 19150000 | 624  | 603  | 19100000 | 0.245351 | 0.000989 | 0 |
| chr11 | 21250001 | 21350000 | 577  | 753  | 21300000 | -0.18812 | 0.009293 | 0 |
| chr11 | 21300001 | 21400000 | 616  | 822  | 21350000 | -0.22025 | 0.002979 | 0 |
| chr11 | 22850001 | 22950000 | 633  | 830  | 22900000 | -0.19494 | 0.007381 | 0 |
| chr11 | 22900001 | 23000000 | 509  | 703  | 22950000 | -0.2699  | 0.000392 | 0 |
| chr11 | 23600001 | 23700000 | 534  | 730  | 23650000 | -0.25509 | 0.000743 | 0 |
| chr11 | 23900001 | 24000000 | 508  | 678  | 23950000 | -0.22049 | 0.002951 | 0 |
| chr11 | 24450001 | 24550000 | 576  | 759  | 24500000 | -0.20207 | 0.005766 | 0 |
| chr11 | 24900001 | 25000000 | 496  | 674  | 24950000 | -0.24645 | 0.001064 | 0 |
| chr11 | 25100001 | 25200000 | 539  | 707  | 25150000 | -0.19546 | 0.007252 | 0 |
| chr11 | 25250001 | 25350000 | 515  | 714  | 25300000 | -0.27539 | 0.000307 | 0 |
| chr11 | 25300001 | 25400000 | 522  | 706  | 25350000 | -0.23966 | 0.001402 | 0 |
| chr11 | 25600001 | 25700000 | 491  | 647  | 25650000 | -0.20208 | 0.005764 | 0 |
| chr11 | 25800001 | 25900000 | 567  | 741  | 25850000 | -0.19016 | 0.008679 | 0 |
| chr11 | 25850001 | 25950000 | 525  | 730  | 25900000 | -0.27962 | 0.000254 | 0 |
| chr11 | 25950001 | 26050000 | 580  | 757  | 2.60E+07 | -0.18828 | 0.009243 | 0 |
| chr11 | 26000001 | 26100000 | 566  | 748  | 26050000 | -0.20627 | 0.004968 | 0 |
| chr11 | 26300001 | 26400000 | 607  | 794  | 26350000 | -0.19148 | 0.008303 | 0 |
| chr11 | 27100001 | 27200000 | 652  | 878  | 27150000 | -0.23339 | 0.001798 | 0 |
| chr11 | 27550001 | 27650000 | 706  | 941  | 27600000 | -0.21856 | 0.003172 | 0 |
| chr11 | 28950001 | 29050000 | 671  | 880  | 2.90E+07 | -0.19523 | 0.00731  | 0 |
| chr11 | 29400001 | 29500000 | 435  | 570  | 29450000 | -0.19398 | 0.007627 | 0 |
| chr11 | 29450001 | 29550000 | 453  | 605  | 29500000 | -0.22146 | 0.002845 | 0 |
| chr11 | 33050001 | 33150000 | 940  | 894  | 33100000 | 0.268349 | 0.000361 | 0 |

|       |          |          |     |      |          |          |          |   |
|-------|----------|----------|-----|------|----------|----------|----------|---|
| chr11 | 33100001 | 33200000 | 880 | 863  | 33150000 | 0.224106 | 0.002349 | 0 |
| chr11 | 36550001 | 36650000 | 577 | 581  | 36600000 | 0.185996 | 0.009441 | 0 |
| chr11 | 36650001 | 36750000 | 445 | 580  | 36700000 | -0.18628 | 0.009875 | 0 |
| chr11 | 37450001 | 37550000 | 384 | 518  | 37500000 | -0.23588 | 0.001629 | 0 |
| chr11 | 37500001 | 37600000 | 382 | 518  | 37550000 | -0.24342 | 0.001204 | 0 |
| chr11 | 37700001 | 37800000 | 392 | 560  | 37750000 | -0.31861 | 3.93E-05 | 0 |
| chr11 | 37750001 | 37850000 | 387 | 506  | 37800000 | -0.19084 | 0.008483 | 0 |
| chr11 | 38350001 | 38450000 | 383 | 500  | 38400000 | -0.18862 | 0.009138 | 0 |
| chr11 | 38400001 | 38500000 | 396 | 535  | 38450000 | -0.23808 | 0.001493 | 0 |
| chr11 | 38450001 | 38550000 | 373 | 507  | 38500000 | -0.24685 | 0.001047 | 0 |
| chr11 | 38550001 | 38650000 | 384 | 504  | 38600000 | -0.19635 | 0.007033 | 0 |
| chr11 | 38600001 | 38700000 | 392 | 537  | 38650000 | -0.25811 | 0.000654 | 0 |
| chr11 | 38650001 | 38750000 | 395 | 519  | 38700000 | -0.19792 | 0.006664 | 0 |
| chr11 | 39050001 | 39150000 | 348 | 463  | 39100000 | -0.21596 | 0.003494 | 0 |
| chr11 | 39100001 | 39200000 | 338 | 465  | 39150000 | -0.26424 | 0.000502 | 0 |
| chr11 | 39150001 | 39250000 | 348 | 501  | 39200000 | -0.32976 | 2.22E-05 | 0 |
| chr11 | 39300001 | 39400000 | 345 | 452  | 39350000 | -0.19376 | 0.007684 | 0 |
| chr11 | 40650001 | 40750000 | 573 | 822  | 40700000 | -0.32464 | 2.89E-05 | 0 |
| chr11 | 40700001 | 40800000 | 566 | 801  | 40750000 | -0.30504 | 7.69E-05 | 0 |
| chr11 | 41100001 | 41200000 | 613 | 829  | 41150000 | -0.23952 | 0.001409 | 0 |
| chr11 | 41200001 | 41300000 | 621 | 826  | 41250000 | -0.21559 | 0.003543 | 0 |
| chr11 | 41250001 | 41350000 | 605 | 799  | 41300000 | -0.2053  | 0.005144 | 0 |
| chr11 | 41400001 | 41500000 | 597 | 795  | 41450000 | -0.21726 | 0.00333  | 0 |
| chr11 | 41450001 | 41550000 | 540 | 735  | 41500000 | -0.24882 | 0.000965 | 0 |
| chr11 | 41600001 | 41700000 | 499 | 708  | 41650000 | -0.30875 | 6.41E-05 | 0 |
| chr11 | 42150001 | 42250000 | 668 | 915  | 42200000 | -0.25796 | 0.000658 | 0 |
| chr11 | 42200001 | 42300000 | 745 | 996  | 42250000 | -0.22294 | 0.00269  | 0 |
| chr11 | 42700001 | 42800000 | 759 | 1036 | 42750000 | -0.25289 | 0.000815 | 0 |
| chr11 | 43000001 | 43100000 | 842 | 1110 | 43050000 | -0.2027  | 0.005639 | 0 |
| chr11 | 43050001 | 43150000 | 838 | 1103 | 43100000 | -0.20045 | 0.006103 | 0 |
| chr11 | 46700001 | 46800000 | 656 | 632  | 46750000 | 0.249734 | 0.000821 | 0 |
| chr11 | 46750001 | 46850000 | 680 | 594  | 46800000 | 0.391035 | 4.75E-07 | 0 |
| chr11 | 46800001 | 46900000 | 665 | 665  | 46850000 | 0.195963 | 0.006694 | 0 |
| chr11 | 47150001 | 47250000 | 668 | 661  | 47200000 | 0.211161 | 0.003856 | 0 |
| chr11 | 47200001 | 47300000 | 658 | 630  | 47250000 | 0.258699 | 0.000556 | 0 |
| chr11 | 47350001 | 47450000 | 740 | 738  | 47400000 | 0.199867 | 0.005828 | 0 |
| chr11 | 47450001 | 47550000 | 647 | 650  | 47500000 | 0.189289 | 0.00844  | 0 |
| chr11 | 47500001 | 47600000 | 638 | 603  | 47550000 | 0.277361 | 0.000238 | 0 |
| chr11 | 47550001 | 47650000 | 637 | 640  | 47600000 | 0.189185 | 0.008471 | 0 |
| chr11 | 47750001 | 47850000 | 538 | 541  | 47800000 | 0.187941 | 0.008838 | 0 |
| chr11 | 48500001 | 48600000 | 136 | 193  | 48550000 | -0.30903 | 6.32E-05 | 0 |
| chr11 | 48550001 | 48650000 | 201 | 266  | 48600000 | -0.20827 | 0.004626 | 0 |
| chr11 | 49250001 | 49350000 | 102 | 144  | 49300000 | -0.30154 | 9.11E-05 | 0 |
| chr11 | 49300001 | 49400000 | 98  | 150  | 49350000 | -0.41815 | 1.41E-07 | 0 |
| chr11 | 49400001 | 49500000 | 135 | 181  | 49450000 | -0.22707 | 0.002298 | 0 |
| chr11 | 49450001 | 49550000 | 127 | 177  | 49500000 | -0.28296 | 0.000218 | 0 |
| chr11 | 49500001 | 49600000 | 120 | 163  | 49550000 | -0.24587 | 0.001089 | 0 |



|       |          |          |     |     |          |          |           |   |
|-------|----------|----------|-----|-----|----------|----------|-----------|---|
| chr11 | 49550001 | 49650000 | 101 | 155 | 49600000 | -0.42195 | 1.11E-07  | 0 |
| chr11 | 49800001 | 49900000 | 80  | 129 | 49850000 | -0.49334 | 9.36E-10  | 0 |
| chr11 | 49850001 | 49950000 | 124 | 178 | 49900000 | -0.32557 | 2.76E-05  | 0 |
| chr11 | 50300001 | 50400000 | 258 | 347 | 50350000 | -0.2316  | 0.001928  | 0 |
| chr11 | 50350001 | 50450000 | 330 | 437 | 50400000 | -0.2092  | 0.004472  | 0 |
| chr11 | 50450001 | 50550000 | 348 | 471 | 50500000 | -0.24068 | 0.001345  | 0 |
| chr11 | 50500001 | 50600000 | 341 | 446 | 50550000 | -0.19131 | 0.00835   | 0 |
| chr11 | 51000001 | 51100000 | 0   | 1   | 51050000 | #NAME?   | 3.67E-137 | 0 |
| chr11 | 51050001 | 51150000 | 1   | 1   | 51100000 | 0.195963 | 0.006694  | 0 |
| chr11 | 51350001 | 51450000 | 197 | 262 | 51400000 | -0.21541 | 0.003566  | 0 |
| chr11 | 51400001 | 51500000 | 108 | 146 | 51450000 | -0.23897 | 0.00144   | 0 |
| chr11 | 51450001 | 51550000 | 100 | 141 | 51500000 | -0.29973 | 9.93E-05  | 0 |
| chr11 | 54650001 | 54750000 | 1   | 1   | 54700000 | 0.195963 | 0.006694  | 0 |
| chr11 | 54700001 | 54800000 | 27  | 36  | 54750000 | -0.21907 | 0.003112  | 0 |
| chr11 | 54750001 | 54850000 | 226 | 300 | 54800000 | -0.21268 | 0.003942  | 0 |
| chr11 | 55050001 | 55150000 | 266 | 355 | 55100000 | -0.22043 | 0.002958  | 0 |
| chr11 | 55350001 | 55450000 | 69  | 92  | 55400000 | -0.21907 | 0.003112  | 0 |
| chr11 | 55600001 | 55700000 | 272 | 372 | 55650000 | -0.25573 | 0.000723  | 0 |
| chr11 | 55650001 | 55750000 | 351 | 458 | 55700000 | -0.18791 | 0.009356  | 0 |
| chr11 | 55750001 | 55850000 | 315 | 483 | 55800000 | -0.42071 | 1.20E-07  | 0 |
| chr11 | 55800001 | 55900000 | 350 | 478 | 55850000 | -0.25369 | 0.000788  | 0 |
| chr11 | 56350001 | 56450000 | 393 | 516 | 56400000 | -0.19688 | 0.006907  | 0 |
| chr11 | 57400001 | 57500000 | 632 | 623 | 57450000 | 0.216655 | 0.003134  | 0 |
| chr11 | 57450001 | 57550000 | 606 | 591 | 57500000 | 0.232123 | 0.001708  | 0 |
| chr11 | 58300001 | 58400000 | 623 | 599 | 58350000 | 0.252639 | 0.000724  | 0 |
| chr11 | 59250001 | 59350000 | 879 | 878 | 59300000 | 0.197605 | 0.006317  | 0 |
| chr11 | 59300001 | 59400000 | 951 | 885 | 59350000 | 0.299731 | 8.07E-05  | 0 |
| chr11 | 60600001 | 60700000 | 750 | 682 | 60650000 | 0.333082 | 1.41E-05  | 0 |
| chr11 | 60650001 | 60750000 | 746 | 688 | 60700000 | 0.31273  | 4.17E-05  | 0 |
| chr11 | 61050001 | 61150000 | 749 | 744 | 61100000 | 0.205626 | 0.004732  | 0 |
| chr11 | 61100001 | 61200000 | 715 | 693 | 61150000 | 0.241051 | 0.001185  | 0 |
| chr11 | 61150001 | 61250000 | 686 | 632 | 61200000 | 0.314247 | 3.85E-05  | 0 |
| chr11 | 61200001 | 61300000 | 759 | 720 | 61250000 | 0.272066 | 0.000304  | 0 |
| chr11 | 61250001 | 61350000 | 914 | 887 | 61300000 | 0.239223 | 0.001278  | 0 |
| chr11 | 61300001 | 61400000 | 906 | 877 | 61350000 | 0.242897 | 0.001097  | 0 |
| chr11 | 61350001 | 61450000 | 723 | 722 | 61400000 | 0.19796  | 0.006238  | 0 |
| chr11 | 61500001 | 61600000 | 885 | 884 | 61550000 | 0.197594 | 0.006319  | 0 |
| chr11 | 61550001 | 61650000 | 824 | 791 | 61600000 | 0.25493  | 0.000656  | 0 |
| chr11 | 61600001 | 61700000 | 806 | 802 | 61650000 | 0.203141 | 0.00518   | 0 |
| chr11 | 61650001 | 61750000 | 776 | 765 | 61700000 | 0.21656  | 0.003145  | 0 |
| chr11 | 61800001 | 61900000 | 556 | 550 | 61850000 | 0.211616 | 0.003791  | 0 |
| chr11 | 62200001 | 62300000 | 626 | 581 | 62250000 | 0.303588 | 6.65E-05  | 0 |
| chr11 | 62250001 | 62350000 | 695 | 654 | 62300000 | 0.283685 | 0.000177  | 0 |
| chr11 | 62300001 | 62400000 | 741 | 708 | 62350000 | 0.261687 | 0.000487  | 0 |
| chr11 | 62350001 | 62450000 | 712 | 654 | 62400000 | 0.31855  | 3.08E-05  | 0 |
| chr11 | 62400001 | 62500000 | 673 | 640 | 62450000 | 0.268498 | 0.000358  | 0 |
| chr11 | 62450001 | 62550000 | 633 | 606 | 62500000 | 0.258851 | 0.000552  | 0 |

|       |          |          |      |      |          |          |          |   |
|-------|----------|----------|------|------|----------|----------|----------|---|
| chr11 | 62500001 | 62600000 | 628  | 573  | 62550000 | 0.328192 | 1.84E-05 | 0 |
| chr11 | 62550001 | 62650000 | 628  | 621  | 62600000 | 0.212134 | 0.003718 | 0 |
| chr11 | 63300001 | 63400000 | 933  | 937  | 63350000 | 0.189791 | 0.008296 | 0 |
| chr11 | 63500001 | 63600000 | 955  | 946  | 63550000 | 0.209624 | 0.004084 | 0 |
| chr11 | 63550001 | 63650000 | 968  | 918  | 63600000 | 0.272476 | 0.000299 | 0 |
| chr11 | 63600001 | 63700000 | 1123 | 1097 | 63650000 | 0.229757 | 0.001878 | 0 |
| chr11 | 63650001 | 63750000 | 1096 | 1062 | 63700000 | 0.241427 | 0.001166 | 0 |
| chr11 | 63700001 | 63800000 | 1107 | 1044 | 63750000 | 0.280497 | 0.000205 | 0 |
| chr11 | 63850001 | 63950000 | 1164 | 1172 | 63900000 | 0.186082 | 0.009414 | 0 |
| chr11 | 63900001 | 64000000 | 1097 | 1055 | 63950000 | 0.252284 | 0.000736 | 0 |
| chr11 | 63950001 | 64050000 | 1150 | 1074 | 6.40E+07 | 0.294603 | 0.000104 | 0 |
| chr11 | 64000001 | 64100000 | 1170 | 1108 | 64050000 | 0.274514 | 0.000272 | 0 |
| chr11 | 64050001 | 64150000 | 1112 | 1099 | 64100000 | 0.212928 | 0.003609 | 0 |
| chr11 | 64550001 | 64650000 | 1157 | 1126 | 64600000 | 0.235145 | 0.001511 | 0 |
| chr11 | 64600001 | 64700000 | 1211 | 1132 | 64650000 | 0.293288 | 0.000111 | 0 |
| chr11 | 64650001 | 64750000 | 1084 | 1056 | 64700000 | 0.233718 | 0.001601 | 0 |
| chr11 | 64800001 | 64900000 | 1171 | 1151 | 64850000 | 0.220816 | 0.002671 | 0 |
| chr11 | 64850001 | 64950000 | 1095 | 1009 | 64900000 | 0.313968 | 3.91E-05 | 0 |
| chr11 | 64900001 | 65000000 | 1026 | 999  | 64950000 | 0.234437 | 0.001555 | 0 |
| chr11 | 65000001 | 65100000 | 966  | 921  | 65050000 | 0.264785 | 0.000424 | 0 |
| chr11 | 65050001 | 65150000 | 1043 | 999  | 65100000 | 0.258146 | 0.00057  | 0 |
| chr11 | 65100001 | 65200000 | 1117 | 1100 | 65150000 | 0.218089 | 0.002967 | 0 |
| chr11 | 65150001 | 65250000 | 1059 | 1007 | 65200000 | 0.268602 | 0.000357 | 0 |
| chr11 | 65250001 | 65350000 | 1116 | 1051 | 65300000 | 0.282537 | 0.000187 | 0 |
| chr11 | 65300001 | 65400000 | 1340 | 1219 | 65350000 | 0.332498 | 1.46E-05 | 0 |
| chr11 | 65350001 | 65450000 | 1210 | 1216 | 65400000 | 0.188827 | 0.008575 | 0 |
| chr11 | 65550001 | 65650000 | 810  | 758  | 65600000 | 0.291687 | 0.00012  | 0 |
| chr11 | 65600001 | 65700000 | 775  | 698  | 65650000 | 0.346932 | 6.55E-06 | 0 |
| chr11 | 65650001 | 65750000 | 707  | 690  | 65700000 | 0.231077 | 0.001781 | 0 |
| chr11 | 65700001 | 65800000 | 711  | 693  | 65750000 | 0.232957 | 0.001651 | 0 |
| chr11 | 65750001 | 65850000 | 758  | 739  | 65800000 | 0.232587 | 0.001676 | 0 |
| chr11 | 65950001 | 66050000 | 749  | 725  | 6.60E+07 | 0.242948 | 0.001094 | 0 |
| chr11 | 66000001 | 66100000 | 804  | 763  | 66050000 | 0.271475 | 0.000313 | 0 |
| chr11 | 66050001 | 66150000 | 767  | 738  | 66100000 | 0.251569 | 0.000759 | 0 |
| chr11 | 66100001 | 66200000 | 735  | 702  | 66150000 | 0.262236 | 0.000475 | 0 |
| chr11 | 66150001 | 66250000 | 679  | 684  | 66200000 | 0.185378 | 0.00964  | 0 |
| chr11 | 66200001 | 66300000 | 679  | 653  | 66250000 | 0.252292 | 0.000735 | 0 |
| chr11 | 66350001 | 66450000 | 635  | 606  | 66400000 | 0.263402 | 0.000451 | 0 |
| chr11 | 66400001 | 66500000 | 777  | 712  | 66450000 | 0.322    | 2.56E-05 | 0 |
| chr11 | 66700001 | 66800000 | 791  | 789  | 66750000 | 0.199615 | 0.00588  | 0 |
| chr11 | 67000001 | 67100000 | 1244 | 1156 | 67050000 | 0.301808 | 7.27E-05 | 0 |
| chr11 | 67050001 | 67150000 | 1197 | 1101 | 67100000 | 0.316572 | 3.41E-05 | 0 |
| chr11 | 67100001 | 67200000 | 1208 | 1106 | 67150000 | 0.323232 | 2.40E-05 | 0 |
| chr11 | 67150001 | 67250000 | 1240 | 1075 | 67200000 | 0.401966 | 2.38E-07 | 0 |
| chr11 | 67200001 | 67300000 | 1169 | 1153 | 67250000 | 0.215845 | 0.003232 | 0 |
| chr11 | 67350001 | 67450000 | 970  | 950  | 67400000 | 0.22602  | 0.002179 | 0 |
| chr11 | 67400001 | 67500000 | 742  | 720  | 67450000 | 0.239385 | 0.001269 | 0 |

|       |          |          |      |      |          |          |          |   |
|-------|----------|----------|------|------|----------|----------|----------|---|
| chr11 | 67450001 | 67550000 | 335  | 311  | 67500000 | 0.30321  | 6.78E-05 | 0 |
| chr11 | 67700001 | 67800000 | 506  | 495  | 67750000 | 0.227672 | 0.002041 | 0 |
| chr11 | 67900001 | 68000000 | 1034 | 1009 | 67950000 | 0.231273 | 0.001767 | 0 |
| chr11 | 67950001 | 68050000 | 935  | 919  | 6.80E+07 | 0.220865 | 0.002666 | 0 |
| chr11 | 68000001 | 68100000 | 992  | 921  | 68050000 | 0.303102 | 6.82E-05 | 0 |
| chr11 | 68050001 | 68150000 | 1047 | 1019 | 68100000 | 0.23507  | 0.001515 | 0 |
| chr11 | 68150001 | 68250000 | 981  | 980  | 68200000 | 0.197434 | 0.006355 | 0 |
| chr11 | 68550001 | 68650000 | 943  | 945  | 68600000 | 0.192906 | 0.00745  | 0 |
| chr11 | 68600001 | 68700000 | 960  | 921  | 68650000 | 0.255796 | 0.000631 | 0 |
| chr11 | 68650001 | 68750000 | 994  | 998  | 68700000 | 0.190169 | 0.008189 | 0 |
| chr11 | 69450001 | 69550000 | 1377 | 1368 | 69500000 | 0.205423 | 0.004767 | 0 |
| chr11 | 70300001 | 70400000 | 1134 | 1125 | 70350000 | 0.207459 | 0.004424 | 0 |
| chr11 | 71300001 | 71400000 | 133  | 131  | 71350000 | 0.217822 | 0.002997 | 0 |
| chr11 | 71350001 | 71450000 | 73   | 69   | 71400000 | 0.277263 | 0.000239 | 0 |
| chr11 | 72500001 | 72600000 | 1315 | 1278 | 72550000 | 0.237138 | 0.001392 | 0 |
| chr11 | 73450001 | 73550000 | 590  | 551  | 73500000 | 0.294626 | 0.000104 | 0 |
| chr11 | 73600001 | 73700000 | 609  | 592  | 73650000 | 0.236808 | 0.001411 | 0 |
| chr11 | 73650001 | 73750000 | 901  | 865  | 73700000 | 0.25479  | 0.00066  | 0 |
| chr11 | 75850001 | 75950000 | 1595 | 1606 | 75900000 | 0.186048 | 0.009425 | 0 |
| chr11 | 75900001 | 76000000 | 1671 | 1592 | 75950000 | 0.265834 | 0.000404 | 0 |
| chr11 | 76700001 | 76800000 | 1350 | 1353 | 76750000 | 0.192761 | 0.007487 | 0 |
| chr11 | 76750001 | 76850000 | 1500 | 1481 | 76800000 | 0.214354 | 0.00342  | 0 |
| chr11 | 79050001 | 79150000 | 1207 | 1579 | 79100000 | -0.19162 | 0.008263 | 0 |
| chr11 | 79550001 | 79650000 | 1756 | 2295 | 79600000 | -0.19024 | 0.008657 | 0 |
| chr11 | 79600001 | 79700000 | 1616 | 2196 | 79650000 | -0.24649 | 0.001062 | 0 |
| chr11 | 79650001 | 79750000 | 1017 | 1337 | 79700000 | -0.19872 | 0.006482 | 0 |
| chr11 | 80200001 | 80300000 | 516  | 705  | 80250000 | -0.25429 | 0.000768 | 0 |
| chr11 | 80250001 | 80350000 | 456  | 635  | 80300000 | -0.28176 | 0.00023  | 0 |
| chr11 | 80400001 | 80500000 | 776  | 1038 | 80450000 | -0.22371 | 0.002613 | 0 |
| chr11 | 81050001 | 81150000 | 974  | 1279 | 81100000 | -0.19706 | 0.006864 | 0 |
| chr11 | 81500001 | 81600000 | 722  | 971  | 81550000 | -0.23151 | 0.001935 | 0 |
| chr11 | 81850001 | 81950000 | 760  | 1012 | 81900000 | -0.21717 | 0.00334  | 0 |
| chr11 | 82300001 | 82400000 | 640  | 837  | 82350000 | -0.19119 | 0.008383 | 0 |
| chr11 | 83050001 | 83150000 | 658  | 882  | 83100000 | -0.22673 | 0.002328 | 0 |
| chr11 | 83100001 | 83200000 | 675  | 895  | 83150000 | -0.21104 | 0.004185 | 0 |
| chr11 | 83900001 | 84000000 | 689  | 908  | 83950000 | -0.20223 | 0.005734 | 0 |
| chr11 | 84000001 | 84100000 | 653  | 877  | 84050000 | -0.22953 | 0.00209  | 0 |
| chr11 | 84050001 | 84150000 | 649  | 860  | 84100000 | -0.21016 | 0.004321 | 0 |
| chr11 | 85000001 | 85100000 | 581  | 764  | 85050000 | -0.19907 | 0.006403 | 0 |
| chr11 | 87450001 | 87550000 | 606  | 795  | 87500000 | -0.19567 | 0.007199 | 0 |
| chr11 | 88100001 | 88200000 | 828  | 830  | 88150000 | 0.192482 | 0.00756  | 0 |
| chr11 | 89000001 | 89100000 | 209  | 207  | 89050000 | 0.209835 | 0.004052 | 0 |
| chr11 | 89250001 | 89350000 | 341  | 460  | 89300000 | -0.2359  | 0.001628 | 0 |
| chr11 | 89300001 | 89400000 | 159  | 218  | 89350000 | -0.25934 | 0.00062  | 0 |
| chr11 | 89400001 | 89500000 | 81   | 80   | 89450000 | 0.213885 | 0.003481 | 0 |
| chr11 | 89450001 | 89550000 | 46   | 39   | 89500000 | 0.434123 | 2.84E-08 | 0 |
| chr11 | 89500001 | 89600000 | 12   | 7    | 89550000 | 0.973571 | 7.95E-31 | 0 |

|       |          |          |     |      |          |          |          |   |
|-------|----------|----------|-----|------|----------|----------|----------|---|
| chr11 | 89550001 | 89650000 | 7   | 11   | 89600000 | -0.45611 | 1.21E-08 | 0 |
| chr11 | 89600001 | 89700000 | 17  | 25   | 89650000 | -0.36043 | 4.28E-06 | 0 |
| chr11 | 89650001 | 89750000 | 13  | 18   | 89700000 | -0.27352 | 0.000334 | 0 |
| chr11 | 90100001 | 90200000 | 516 | 731  | 90150000 | -0.30654 | 7.14E-05 | 0 |
| chr11 | 90350001 | 90450000 | 538 | 714  | 90400000 | -0.21235 | 0.003989 | 0 |
| chr11 | 90600001 | 90700000 | 641 | 872  | 90650000 | -0.24804 | 0.000996 | 0 |
| chr11 | 90650001 | 90750000 | 510 | 714  | 90700000 | -0.28946 | 0.000161 | 0 |
| chr11 | 90700001 | 90800000 | 474 | 643  | 90750000 | -0.24397 | 0.001177 | 0 |
| chr11 | 91200001 | 91300000 | 559 | 730  | 91250000 | -0.18909 | 0.008997 | 0 |
| chr11 | 91250001 | 91350000 | 561 | 735  | 91300000 | -0.19378 | 0.00768  | 0 |
| chr11 | 91400001 | 91500000 | 561 | 751  | 91450000 | -0.22485 | 0.002502 | 0 |
| chr11 | 91450001 | 91550000 | 600 | 814  | 91500000 | -0.2441  | 0.001171 | 0 |
| chr11 | 91500001 | 91600000 | 671 | 883  | 91550000 | -0.20014 | 0.006169 | 0 |
| chr11 | 91650001 | 91750000 | 586 | 769  | 91700000 | -0.19612 | 0.00709  | 0 |
| chr11 | 91700001 | 91800000 | 565 | 765  | 91750000 | -0.24125 | 0.001315 | 0 |
| chr11 | 93550001 | 93650000 | 605 | 874  | 93600000 | -0.33474 | 1.71E-05 | 0 |
| chr11 | 93600001 | 93700000 | 609 | 840  | 93650000 | -0.26798 | 0.000427 | 0 |
| chr11 | 93650001 | 93750000 | 673 | 883  | 93700000 | -0.19584 | 0.007157 | 0 |
| chr11 | 93700001 | 93800000 | 662 | 908  | 93750000 | -0.2599  | 0.000606 | 0 |
| chr11 | 95050001 | 95150000 | 852 | 1178 | 95100000 | -0.27145 | 0.000366 | 0 |
| chr11 | 96350001 | 96450000 | 94  | 146  | 96400000 | -0.43927 | 3.68E-08 | 0 |
| chr11 | 96400001 | 96500000 | 376 | 508  | 96450000 | -0.23813 | 0.00149  | 0 |
| chr11 | 97450001 | 97550000 | 605 | 800  | 97500000 | -0.2071  | 0.004823 | 0 |
| chr11 | 97750001 | 97850000 | 628 | 848  | 97800000 | -0.23734 | 0.001538 | 0 |
| chr11 | 99000001 | 99100000 | 641 | 840  | 99050000 | -0.1941  | 0.007596 | 0 |
| chr11 | 99250001 | 99350000 | 643 | 847  | 99300000 | -0.20158 | 0.005866 | 0 |
| chr11 | 99300001 | 99400000 | 639 | 863  | 99350000 | -0.23758 | 0.001523 | 0 |
| chr11 | 99650001 | 99750000 | 659 | 871  | 99700000 | -0.20643 | 0.00494  | 0 |
| chr11 | 1.01E+08 | 1.02E+08 | 674 | 897  | 1.01E+08 | -0.2164  | 0.003438 | 0 |
| chr11 | 1.01E+08 | 1.02E+08 | 650 | 851  | 1.02E+08 | -0.19276 | 0.007952 | 0 |
| chr11 | 1.02E+08 | 1.02E+08 | 755 | 743  | 1.02E+08 | 0.219077 | 0.002856 | 0 |
| chr11 | 1.02E+08 | 1.02E+08 | 658 | 613  | 1.02E+08 | 0.298164 | 8.73E-05 | 0 |
| chr11 | 1.03E+08 | 1.04E+08 | 461 | 614  | 1.04E+08 | -0.21751 | 0.003299 | 0 |
| chr11 | 1.04E+08 | 1.04E+08 | 442 | 592  | 1.04E+08 | -0.22559 | 0.002432 | 0 |
| chr11 | 1.04E+08 | 1.04E+08 | 466 | 615  | 1.04E+08 | -0.20429 | 0.005331 | 0 |
| chr11 | 1.04E+08 | 1.04E+08 | 455 | 598  | 1.04E+08 | -0.19832 | 0.006573 | 0 |
| chr11 | 1.05E+08 | 1.05E+08 | 474 | 630  | 1.05E+08 | -0.2145  | 0.003687 | 0 |
| chr11 | 1.05E+08 | 1.06E+08 | 473 | 621  | 1.06E+08 | -0.19679 | 0.006928 | 0 |
| chr11 | 1.06E+08 | 1.06E+08 | 436 | 593  | 1.06E+08 | -0.24774 | 0.001009 | 0 |
| chr11 | 1.06E+08 | 1.06E+08 | 461 | 603  | 1.06E+08 | -0.19143 | 0.008317 | 0 |
| chr11 | 1.07E+08 | 1.07E+08 | 431 | 563  | 1.07E+08 | -0.18948 | 0.008878 | 0 |
| chr11 | 1.08E+08 | 1.08E+08 | 465 | 463  | 1.08E+08 | 0.202182 | 0.005363 | 0 |
| chr11 | 1.08E+08 | 1.08E+08 | 593 | 546  | 1.08E+08 | 0.315094 | 3.69E-05 | 0 |
| chr11 | 1.08E+08 | 1.08E+08 | 629 | 568  | 1.08E+08 | 0.343132 | 8.11E-06 | 0 |
| chr11 | 1.09E+08 | 1.09E+08 | 430 | 567  | 1.09E+08 | -0.20305 | 0.005571 | 0 |
| chr11 | 1.09E+08 | 1.09E+08 | 467 | 609  | 1.09E+08 | -0.18706 | 0.009626 | 0 |
| chr11 | 1.09E+08 | 1.09E+08 | 453 | 625  | 1.09E+08 | -0.26838 | 0.000419 | 0 |

|       |          |          |     |     |          |          |          |   |
|-------|----------|----------|-----|-----|----------|----------|----------|---|
| chr11 | 1.11E+08 | 1.11E+08 | 476 | 636 | 1.11E+08 | -0.2221  | 0.002777 | 0 |
| chr11 | 1.12E+08 | 1.12E+08 | 678 | 645 | 1.12E+08 | 0.267949 | 0.000367 | 0 |
| chr11 | 1.13E+08 | 1.13E+08 | 524 | 684 | 1.13E+08 | -0.18847 | 0.009185 | 0 |
| chr11 | 1.13E+08 | 1.13E+08 | 479 | 702 | 1.13E+08 | -0.35548 | 5.62E-06 | 0 |
| chr11 | 1.13E+08 | 1.13E+08 | 525 | 721 | 1.13E+08 | -0.26172 | 0.00056  | 0 |
| chr11 | 1.14E+08 | 1.14E+08 | 622 | 623 | 1.14E+08 | 0.193645 | 0.00726  | 0 |
| chr11 | 1.14E+08 | 1.14E+08 | 699 | 682 | 1.14E+08 | 0.231484 | 0.001752 | 0 |
| chr11 | 1.14E+08 | 1.14E+08 | 713 | 714 | 1.14E+08 | 0.193941 | 0.007186 | 0 |
| chr11 | 1.17E+08 | 1.17E+08 | 692 | 692 | 1.17E+08 | 0.195963 | 0.006694 | 0 |
| chr11 | 1.18E+08 | 1.18E+08 | 705 | 698 | 1.18E+08 | 0.210359 | 0.003973 | 0 |
| chr11 | 1.18E+08 | 1.19E+08 | 673 | 666 | 1.18E+08 | 0.211047 | 0.003873 | 0 |
| chr11 | 1.18E+08 | 1.19E+08 | 763 | 759 | 1.19E+08 | 0.203546 | 0.005104 | 0 |
| chr11 | 1.19E+08 | 1.19E+08 | 753 | 725 | 1.19E+08 | 0.250632 | 0.00079  | 0 |
| chr11 | 1.19E+08 | 1.19E+08 | 701 | 643 | 1.19E+08 | 0.320559 | 2.77E-05 | 0 |
| chr11 | 1.19E+08 | 1.19E+08 | 754 | 720 | 1.19E+08 | 0.262531 | 0.000469 | 0 |
| chr11 | 1.19E+08 | 1.19E+08 | 654 | 631 | 1.19E+08 | 0.247614 | 0.000899 | 0 |
| chr11 | 1.19E+08 | 1.19E+08 | 711 | 712 | 1.19E+08 | 0.193935 | 0.007187 | 0 |
| chr11 | 1.19E+08 | 1.19E+08 | 720 | 708 | 1.19E+08 | 0.220211 | 0.002734 | 0 |
| chr11 | 1.22E+08 | 1.22E+08 | 645 | 644 | 1.22E+08 | 0.198202 | 0.006184 | 0 |
| chr11 | 1.22E+08 | 1.22E+08 | 534 | 699 | 1.22E+08 | -0.19249 | 0.008024 | 0 |
| chr11 | 1.22E+08 | 1.22E+08 | 450 | 623 | 1.22E+08 | -0.27334 | 0.000337 | 0 |
| chr11 | 1.24E+08 | 1.24E+08 | 492 | 645 | 1.24E+08 | -0.19468 | 0.007449 | 0 |
| chr11 | 1.25E+08 | 1.25E+08 | 679 | 679 | 1.25E+08 | 0.195963 | 0.006694 | 0 |
| chr11 | 1.25E+08 | 1.25E+08 | 580 | 562 | 1.25E+08 | 0.241446 | 0.001165 | 0 |
| chr11 | 1.26E+08 | 1.26E+08 | 690 | 658 | 1.26E+08 | 0.264472 | 0.00043  | 0 |
| chr11 | 1.27E+08 | 1.27E+08 | 418 | 552 | 1.27E+08 | -0.2052  | 0.005162 | 0 |
| chr11 | 1.28E+08 | 1.28E+08 | 453 | 609 | 1.28E+08 | -0.23097 | 0.001976 | 0 |
| chr11 | 1.28E+08 | 1.28E+08 | 386 | 509 | 1.28E+08 | -0.2031  | 0.00556  | 0 |
| chr11 | 1.3E+08  | 1.3E+08  | 617 | 609 | 1.3E+08  | 0.214791 | 0.003364 | 0 |
| chr11 | 1.3E+08  | 1.3E+08  | 560 | 557 | 1.3E+08  | 0.203713 | 0.005074 | 0 |
| chr11 | 1.32E+08 | 1.32E+08 | 497 | 679 | 1.32E+08 | -0.2542  | 0.000771 | 0 |
| chr11 | 1.32E+08 | 1.32E+08 | 426 | 565 | 1.32E+08 | -0.21143 | 0.004125 | 0 |
| chr11 | 1.33E+08 | 1.33E+08 | 442 | 586 | 1.33E+08 | -0.21089 | 0.004207 | 0 |
| chr11 | 1.33E+08 | 1.33E+08 | 414 | 580 | 1.33E+08 | -0.29046 | 0.000154 | 0 |
| chr11 | 1.33E+08 | 1.33E+08 | 456 | 597 | 1.33E+08 | -0.19273 | 0.007958 | 0 |
| chr11 | 1.33E+08 | 1.33E+08 | 461 | 601 | 1.33E+08 | -0.18664 | 0.009761 | 0 |
| chr11 | 1.34E+08 | 1.34E+08 | 672 | 674 | 1.34E+08 | 0.191676 | 0.007774 | 0 |
| chr11 | 100001   | 200000   | 182 | 184 | 150000   | 0.180196 | 0.011459 | 0 |
| chr11 | 150001   | 250000   | 529 | 549 | 2.00E+05 | 0.142425 | 0.036044 | 0 |
| chr11 | 950001   | 1050000  | 810 | 832 | 1.00E+06 | 0.157301 | 0.023503 | 0 |
| chr11 | 1000001  | 1100000  | 895 | 924 | 1050000  | 0.149958 | 0.029138 | 0 |
| chr11 | 1050001  | 1150000  | 819 | 826 | 1100000  | 0.183685 | 0.010205 | 0 |
| chr11 | 1400001  | 1500000  | 787 | 817 | 1450000  | 0.141991 | 0.03648  | 0 |
| chr11 | 1900001  | 2000000  | 830 | 845 | 1950000  | 0.170123 | 0.015862 | 0 |
| chr11 | 2000001  | 2100000  | 816 | 829 | 2050000  | 0.17316  | 0.014402 | 0 |
| chr11 | 2150001  | 2250000  | 861 | 899 | 2200000  | 0.133655 | 0.045717 | 0 |
| chr11 | 2450001  | 2550000  | 708 | 721 | 2500000  | 0.169713 | 0.016068 | 0 |

|       |          |          |      |      |          |          |          |   |
|-------|----------|----------|------|------|----------|----------|----------|---|
| chr11 | 2500001  | 2600000  | 673  | 694  | 2550000  | 0.151634 | 0.027762 | 0 |
| chr11 | 2950001  | 3050000  | 1454 | 1500 | 3.00E+06 | 0.151028 | 0.028253 | 0 |
| chr11 | 3150001  | 3250000  | 1561 | 1598 | 3200000  | 0.162166 | 0.020301 | 0 |
| chr11 | 3200001  | 3300000  | 991  | 1008 | 3250000  | 0.171424 | 0.015221 | 0 |
| chr11 | 3550001  | 3650000  | 473  | 595  | 3600000  | -0.13509 | 0.045021 | 0 |
| chr11 | 3650001  | 3750000  | 1240 | 1285 | 3700000  | 0.144535 | 0.033986 | 0 |
| chr11 | 3800001  | 3900000  | 1337 | 1361 | 3850000  | 0.170295 | 0.015775 | 0 |
| chr11 | 4250001  | 4350000  | 55   | 71   | 4300000  | -0.17242 | 0.01541  | 0 |
| chr11 | 4350001  | 4450000  | 458  | 585  | 4400000  | -0.15713 | 0.024449 | 0 |
| chr11 | 5400001  | 5500000  | 627  | 805  | 5450000  | -0.16456 | 0.019612 | 0 |
| chr11 | 5450001  | 5550000  | 705  | 894  | 5500000  | -0.14669 | 0.032908 | 0 |
| chr11 | 5850001  | 5950000  | 589  | 747  | 5900000  | -0.14688 | 0.032735 | 0 |
| chr11 | 6400001  | 6500000  | 1247 | 1260 | 6450000  | 0.181001 | 0.011158 | 0 |
| chr11 | 6450001  | 6550000  | 1001 | 1036 | 6500000  | 0.146381 | 0.032266 | 0 |
| chr11 | 6950001  | 7050000  | 613  | 770  | 7.00E+06 | -0.13301 | 0.047531 | 0 |
| chr11 | 7100001  | 7200000  | 615  | 781  | 7150000  | -0.14877 | 0.031047 | 0 |
| chr11 | 7150001  | 7250000  | 647  | 831  | 7200000  | -0.16512 | 0.019284 | 0 |
| chr11 | 7250001  | 7350000  | 683  | 877  | 7300000  | -0.16473 | 0.019513 | 0 |
| chr11 | 8200001  | 8300000  | 1073 | 1116 | 8250000  | 0.139276 | 0.039303 | 0 |
| chr11 | 9100001  | 9200000  | 1276 | 1332 | 9150000  | 0.133997 | 0.045304 | 0 |
| chr11 | 9250001  | 9350000  | 1058 | 1075 | 9300000  | 0.172966 | 0.014492 | 0 |
| chr11 | 9300001  | 9400000  | 983  | 996  | 9350000  | 0.177009 | 0.01272  | 0 |
| chr11 | 9650001  | 9750000  | 1206 | 1251 | 9700000  | 0.143111 | 0.035364 | 0 |
| chr11 | 9700001  | 9800000  | 1256 | 1300 | 9750000  | 0.146288 | 0.032351 | 0 |
| chr11 | 9750001  | 9850000  | 1124 | 1134 | 9800000  | 0.183184 | 0.010377 | 0 |
| chr11 | 10300001 | 10400000 | 1049 | 1074 | 10350000 | 0.161984 | 0.020414 | 0 |
| chr11 | 10750001 | 10850000 | 1015 | 1036 | 10800000 | 0.166419 | 0.017812 | 0 |
| chr11 | 10800001 | 10900000 | 982  | 1017 | 10850000 | 0.145438 | 0.033135 | 0 |
| chr11 | 11700001 | 11800000 | 508  | 638  | 11750000 | -0.13276 | 0.047833 | 0 |
| chr11 | 12000001 | 12100000 | 698  | 704  | 12050000 | 0.183615 | 0.010229 | 0 |
| chr11 | 12700001 | 12800000 | 1077 | 1100 | 12750000 | 0.165478 | 0.018339 | 0 |
| chr11 | 13800001 | 13900000 | 633  | 822  | 13850000 | -0.18097 | 0.011747 | 0 |
| chr11 | 14500001 | 14600000 | 517  | 540  | 14550000 | 0.133168 | 0.046311 | 0 |
| chr11 | 14750001 | 14850000 | 430  | 442  | 14800000 | 0.156253 | 0.024247 | 0 |
| chr11 | 15050001 | 15150000 | 528  | 669  | 15100000 | -0.14551 | 0.034004 | 0 |
| chr11 | 15850001 | 15950000 | 471  | 612  | 15900000 | -0.18184 | 0.01142  | 0 |
| chr11 | 16100001 | 16200000 | 414  | 526  | 16150000 | -0.14947 | 0.030446 | 0 |
| chr11 | 16700001 | 16800000 | 433  | 555  | 16750000 | -0.16216 | 0.021077 | 0 |
| chr11 | 16850001 | 16950000 | 532  | 678  | 16900000 | -0.1539  | 0.026845 | 0 |
| chr11 | 17150001 | 17250000 | 564  | 576  | 17200000 | 0.165589 | 0.018276 | 0 |
| chr11 | 17350001 | 17450000 | 667  | 697  | 17400000 | 0.132491 | 0.047145 | 0 |
| chr11 | 17650001 | 17750000 | 645  | 819  | 17700000 | -0.1486  | 0.031197 | 0 |
| chr11 | 17850001 | 17950000 | 572  | 719  | 17900000 | -0.13401 | 0.046303 | 0 |
| chr11 | 18350001 | 18450000 | 577  | 585  | 18400000 | 0.176098 | 0.013102 | 0 |
| chr11 | 18400001 | 18500000 | 523  | 539  | 18450000 | 0.152489 | 0.027081 | 0 |
| chr11 | 18600001 | 18700000 | 512  | 532  | 18650000 | 0.140681 | 0.037821 | 0 |
| chr11 | 18750001 | 18850000 | 697  | 724  | 18800000 | 0.141132 | 0.037354 | 0 |

|       |          |          |     |      |          |          |          |   |
|-------|----------|----------|-----|------|----------|----------|----------|---|
| chr11 | 19700001 | 19800000 | 751 | 778  | 19750000 | 0.145006 | 0.03354  | 0 |
| chr11 | 19800001 | 19900000 | 628 | 813  | 19850000 | -0.17653 | 0.013544 | 0 |
| chr11 | 19900001 | 20000000 | 674 | 688  | 19950000 | 0.166303 | 0.017876 | 0 |
| chr11 | 20050001 | 20150000 | 645 | 669  | 20100000 | 0.143256 | 0.035221 | 0 |
| chr11 | 20250001 | 20350000 | 490 | 626  | 20300000 | -0.15742 | 0.024241 | 0 |
| chr11 | 20500001 | 20600000 | 445 | 569  | 20550000 | -0.15866 | 0.023375 | 0 |
| chr11 | 20550001 | 20650000 | 486 | 622  | 20600000 | -0.16    | 0.022474 | 0 |
| chr11 | 20650001 | 20750000 | 488 | 613  | 20700000 | -0.13304 | 0.047489 | 0 |
| chr11 | 20700001 | 20800000 | 501 | 644  | 20750000 | -0.16629 | 0.018614 | 0 |
| chr11 | 20900001 | 21000000 | 668 | 844  | 20950000 | -0.14143 | 0.038012 | 0 |
| chr11 | 21350001 | 21450000 | 629 | 810  | 21400000 | -0.1689  | 0.017187 | 0 |
| chr11 | 21650001 | 21750000 | 563 | 709  | 21700000 | -0.13669 | 0.04316  | 0 |
| chr11 | 21900001 | 22000000 | 645 | 826  | 21950000 | -0.16088 | 0.021894 | 0 |
| chr11 | 22100001 | 22200000 | 628 | 805  | 22150000 | -0.16226 | 0.021012 | 0 |
| chr11 | 22300001 | 22400000 | 583 | 734  | 22350000 | -0.13632 | 0.04358  | 0 |
| chr11 | 22950001 | 23050000 | 517 | 665  | 2.30E+07 | -0.16723 | 0.018089 | 0 |
| chr11 | 23000001 | 23100000 | 551 | 698  | 23050000 | -0.14521 | 0.034281 | 0 |
| chr11 | 23200001 | 23300000 | 533 | 694  | 23250000 | -0.18484 | 0.010357 | 0 |
| chr11 | 23250001 | 23350000 | 548 | 712  | 23300000 | -0.18174 | 0.011459 | 0 |
| chr11 | 23400001 | 23500000 | 516 | 668  | 23450000 | -0.17651 | 0.013549 | 0 |
| chr11 | 23450001 | 23550000 | 538 | 675  | 23500000 | -0.13132 | 0.049655 | 0 |
| chr11 | 23950001 | 24050000 | 566 | 715  | 2.40E+07 | -0.14118 | 0.038274 | 0 |
| chr11 | 24050001 | 24150000 | 602 | 757  | 24100000 | -0.13457 | 0.045638 | 0 |
| chr11 | 24100001 | 24200000 | 614 | 773  | 24150000 | -0.13627 | 0.043643 | 0 |
| chr11 | 24250001 | 24350000 | 536 | 695  | 24300000 | -0.17882 | 0.01259  | 0 |
| chr11 | 24300001 | 24400000 | 531 | 690  | 24350000 | -0.18192 | 0.011391 | 0 |
| chr11 | 24600001 | 24700000 | 570 | 741  | 24650000 | -0.18255 | 0.011161 | 0 |
| chr11 | 24650001 | 24750000 | 573 | 739  | 24700000 | -0.17108 | 0.01607  | 0 |
| chr11 | 24750001 | 24850000 | 555 | 697  | 24800000 | -0.13271 | 0.047904 | 0 |
| chr11 | 24850001 | 24950000 | 497 | 630  | 24900000 | -0.14614 | 0.033409 | 0 |
| chr11 | 24950001 | 25050000 | 476 | 603  | 2.50E+07 | -0.14523 | 0.03426  | 0 |
| chr11 | 25150001 | 25250000 | 532 | 680  | 25200000 | -0.15815 | 0.023731 | 0 |
| chr11 | 25200001 | 25300000 | 547 | 704  | 25250000 | -0.16807 | 0.017628 | 0 |
| chr11 | 25350001 | 25450000 | 533 | 693  | 25400000 | -0.18276 | 0.011086 | 0 |
| chr11 | 25650001 | 25750000 | 496 | 641  | 25700000 | -0.17402 | 0.014659 | 0 |
| chr11 | 26350001 | 26450000 | 640 | 813  | 26400000 | -0.14922 | 0.03066  | 0 |
| chr11 | 26800001 | 26900000 | 636 | 798  | 26850000 | -0.1314  | 0.049552 | 0 |
| chr11 | 26950001 | 27050000 | 640 | 803  | 2.70E+07 | -0.13137 | 0.049596 | 0 |
| chr11 | 27000001 | 27100000 | 635 | 803  | 27050000 | -0.14268 | 0.036744 | 0 |
| chr11 | 27050001 | 27150000 | 630 | 819  | 27100000 | -0.18255 | 0.011161 | 0 |
| chr11 | 27250001 | 27350000 | 672 | 852  | 27300000 | -0.14643 | 0.033145 | 0 |
| chr11 | 27350001 | 27450000 | 952 | 977  | 27400000 | 0.158566 | 0.022632 | 0 |
| chr11 | 27400001 | 27500000 | 928 | 959  | 27450000 | 0.148557 | 0.030332 | 0 |
| chr11 | 27750001 | 27850000 | 820 | 1035 | 27800000 | -0.13997 | 0.03954  | 0 |
| chr11 | 28500001 | 28600000 | 748 | 944  | 28550000 | -0.13979 | 0.039738 | 0 |
| chr11 | 28900001 | 29000000 | 714 | 910  | 28950000 | -0.15398 | 0.02678  | 0 |
| chr11 | 29600001 | 29700000 | 402 | 506  | 29650000 | -0.13598 | 0.043976 | 0 |

|       |          |          |      |      |          |          |          |   |
|-------|----------|----------|------|------|----------|----------|----------|---|
| chr11 | 29900001 | 30000000 | 636  | 813  | 29950000 | -0.15827 | 0.023648 | 0 |
| chr11 | 29950001 | 30050000 | 689  | 882  | 3.00E+07 | -0.16031 | 0.022265 | 0 |
| chr11 | 31000001 | 31100000 | 683  | 860  | 31050000 | -0.13649 | 0.043389 | 0 |
| chr11 | 31250001 | 31350000 | 687  | 880  | 31300000 | -0.16123 | 0.021667 | 0 |
| chr11 | 31550001 | 31650000 | 614  | 798  | 31600000 | -0.18219 | 0.011293 | 0 |
| chr11 | 31800001 | 31900000 | 1045 | 1083 | 31850000 | 0.144433 | 0.034083 | 0 |
| chr11 | 32550001 | 32650000 | 741  | 774  | 32600000 | 0.133103 | 0.04639  | 0 |
| chr11 | 33000001 | 33100000 | 909  | 948  | 33050000 | 0.135356 | 0.043693 | 0 |
| chr11 | 34000001 | 34100000 | 562  | 582  | 34050000 | 0.145514 | 0.033065 | 0 |
| chr11 | 34050001 | 34150000 | 648  | 677  | 34100000 | 0.132801 | 0.046762 | 0 |
| chr11 | 34200001 | 34300000 | 774  | 801  | 34250000 | 0.146494 | 0.032163 | 0 |
| chr11 | 34550001 | 34650000 | 1011 | 1056 | 34600000 | 0.133136 | 0.046349 | 0 |
| chr11 | 34600001 | 34700000 | 1046 | 1091 | 34650000 | 0.135195 | 0.043882 | 0 |
| chr11 | 34750001 | 34850000 | 739  | 962  | 34800000 | -0.1845  | 0.010472 | 0 |
| chr11 | 35550001 | 35650000 | 855  | 1074 | 35600000 | -0.13303 | 0.047499 | 0 |
| chr11 | 35600001 | 35700000 | 737  | 931  | 35650000 | -0.14115 | 0.038299 | 0 |
| chr11 | 36050001 | 36150000 | 552  | 700  | 36100000 | -0.14672 | 0.032876 | 0 |
| chr11 | 36400001 | 36500000 | 674  | 705  | 36450000 | 0.131088 | 0.048914 | 0 |
| chr11 | 36700001 | 36800000 | 506  | 659  | 36750000 | -0.18518 | 0.010241 | 0 |
| chr11 | 36750001 | 36850000 | 506  | 642  | 36800000 | -0.14747 | 0.032197 | 0 |
| chr11 | 37400001 | 37500000 | 390  | 497  | 37450000 | -0.15381 | 0.026912 | 0 |
| chr11 | 37650001 | 37750000 | 425  | 534  | 37700000 | -0.13341 | 0.047033 | 0 |
| chr11 | 37850001 | 37950000 | 384  | 493  | 37900000 | -0.16452 | 0.019637 | 0 |
| chr11 | 38150001 | 38250000 | 411  | 523  | 38200000 | -0.15171 | 0.028576 | 0 |
| chr11 | 38200001 | 38300000 | 381  | 479  | 38250000 | -0.13427 | 0.045992 | 0 |
| chr11 | 38500001 | 38600000 | 366  | 461  | 38550000 | -0.13696 | 0.04285  | 0 |
| chr11 | 39000001 | 39100000 | 371  | 476  | 39050000 | -0.16358 | 0.0202   | 0 |
| chr11 | 39400001 | 39500000 | 353  | 448  | 39450000 | -0.14787 | 0.031844 | 0 |
| chr11 | 39450001 | 39550000 | 358  | 456  | 39500000 | -0.15311 | 0.027456 | 0 |
| chr11 | 39550001 | 39650000 | 339  | 428  | 39600000 | -0.14036 | 0.039126 | 0 |
| chr11 | 39750001 | 39850000 | 337  | 430  | 39800000 | -0.15563 | 0.025539 | 0 |
| chr11 | 39800001 | 39900000 | 345  | 437  | 39850000 | -0.14507 | 0.034411 | 0 |
| chr11 | 40000001 | 40100000 | 592  | 753  | 40050000 | -0.15109 | 0.029084 | 0 |
| chr11 | 40600001 | 40700000 | 667  | 860  | 40650000 | -0.17069 | 0.016265 | 0 |
| chr11 | 40750001 | 40850000 | 639  | 812  | 40800000 | -0.1497  | 0.030248 | 0 |
| chr11 | 41150001 | 41250000 | 651  | 829  | 41200000 | -0.15275 | 0.02774  | 0 |
| chr11 | 41350001 | 41450000 | 664  | 841  | 41400000 | -0.14496 | 0.03452  | 0 |
| chr11 | 41650001 | 41750000 | 522  | 676  | 41700000 | -0.17701 | 0.013337 | 0 |
| chr11 | 41700001 | 41800000 | 493  | 621  | 41750000 | -0.13704 | 0.042756 | 0 |
| chr11 | 41850001 | 41950000 | 576  | 735  | 41900000 | -0.15571 | 0.025474 | 0 |
| chr11 | 43900001 | 44000000 | 1008 | 1044 | 43950000 | 0.145337 | 0.03323  | 0 |
| chr11 | 44350001 | 44450000 | 988  | 1019 | 44400000 | 0.151392 | 0.027957 | 0 |
| chr11 | 44700001 | 44800000 | 1055 | 1100 | 44750000 | 0.135703 | 0.04329  | 0 |
| chr11 | 44950001 | 45050000 | 1313 | 1350 | 4.50E+07 | 0.155871 | 0.024523 | 0 |
| chr11 | 45350001 | 45450000 | 1356 | 1419 | 45400000 | 0.130446 | 0.049742 | 0 |
| chr11 | 45600001 | 45700000 | 1476 | 1523 | 45650000 | 0.15074  | 0.028489 | 0 |
| chr11 | 45800001 | 45900000 | 1280 | 1335 | 45850000 | 0.135267 | 0.043797 | 0 |



|       |          |          |      |      |          |          |          |   |
|-------|----------|----------|------|------|----------|----------|----------|---|
| chr11 | 45850001 | 45950000 | 1559 | 1574 | 45900000 | 0.182148 | 0.010742 | 0 |
| chr11 | 45900001 | 46000000 | 1568 | 1636 | 45950000 | 0.134716 | 0.044446 | 0 |
| chr11 | 46000001 | 46100000 | 1035 | 1067 | 46050000 | 0.152034 | 0.027442 | 0 |
| chr11 | 46550001 | 46650000 | 590  | 613  | 46600000 | 0.140791 | 0.037706 | 0 |
| chr11 | 47400001 | 47500000 | 683  | 691  | 47450000 | 0.179163 | 0.011855 | 0 |
| chr11 | 47700001 | 47800000 | 559  | 572  | 47750000 | 0.162796 | 0.019914 | 0 |
| chr11 | 47850001 | 47950000 | 562  | 573  | 47900000 | 0.167998 | 0.016957 | 0 |
| chr11 | 47900001 | 48000000 | 576  | 589  | 47950000 | 0.163764 | 0.019333 | 0 |
| chr11 | 47950001 | 48050000 | 617  | 623  | 4.80E+07 | 0.182001 | 0.010794 | 0 |
| chr11 | 48100001 | 48200000 | 688  | 703  | 48150000 | 0.164847 | 0.0187   | 0 |
| chr11 | 48150001 | 48250000 | 586  | 613  | 48200000 | 0.130977 | 0.049057 | 0 |
| chr11 | 48650001 | 48750000 | 212  | 270  | 48700000 | -0.15293 | 0.027597 | 0 |
| chr11 | 49150001 | 49250000 | 116  | 147  | 49200000 | -0.14573 | 0.033795 | 0 |
| chr11 | 49600001 | 49700000 | 97   | 125  | 49650000 | -0.16991 | 0.016661 | 0 |
| chr11 | 49750001 | 49850000 | 102  | 131  | 49800000 | -0.16503 | 0.019334 | 0 |
| chr11 | 50000001 | 50100000 | 211  | 220  | 50050000 | 0.135703 | 0.04329  | 0 |
| chr11 | 50100001 | 50200000 | 250  | 324  | 50150000 | -0.1781  | 0.012881 | 0 |
| chr11 | 50750001 | 50850000 | 99   | 128  | 50800000 | -0.17468 | 0.014358 | 0 |
| chr11 | 51500001 | 51600000 | 382  | 482  | 51550000 | -0.1395  | 0.040047 | 0 |
| chr11 | 54950001 | 55050000 | 279  | 288  | 5.50E+07 | 0.150159 | 0.02897  | 0 |
| chr11 | 55300001 | 55400000 | 231  | 290  | 55350000 | -0.1322  | 0.048542 | 0 |
| chr11 | 55400001 | 55500000 | 170  | 215  | 55450000 | -0.14284 | 0.036586 | 0 |
| chr11 | 55700001 | 55800000 | 356  | 460  | 55750000 | -0.17379 | 0.014764 | 0 |
| chr11 | 55850001 | 55950000 | 376  | 473  | 55900000 | -0.13514 | 0.044952 | 0 |
| chr11 | 55950001 | 56050000 | 411  | 428  | 5.60E+07 | 0.137491 | 0.041256 | 0 |
| chr11 | 56100001 | 56200000 | 411  | 531  | 56150000 | -0.17361 | 0.014849 | 0 |
| chr11 | 56400001 | 56500000 | 399  | 517  | 56450000 | -0.17781 | 0.013001 | 0 |
| chr11 | 56550001 | 56650000 | 452  | 572  | 56600000 | -0.14373 | 0.035706 | 0 |
| chr11 | 57000001 | 57100000 | 743  | 760  | 57050000 | 0.163326 | 0.019594 | 0 |
| chr11 | 57050001 | 57150000 | 772  | 783  | 57100000 | 0.175552 | 0.013336 | 0 |
| chr11 | 57200001 | 57300000 | 778  | 793  | 57250000 | 0.168412 | 0.016738 | 0 |
| chr11 | 57250001 | 57350000 | 703  | 715  | 57300000 | 0.171544 | 0.015163 | 0 |
| chr11 | 57350001 | 57450000 | 669  | 690  | 57400000 | 0.151373 | 0.027973 | 0 |
| chr11 | 57500001 | 57600000 | 642  | 652  | 57550000 | 0.173664 | 0.014171 | 0 |
| chr11 | 58350001 | 58450000 | 612  | 638  | 58400000 | 0.135938 | 0.043017 | 0 |
| chr11 | 59150001 | 59250000 | 544  | 686  | 59200000 | -0.13864 | 0.040978 | 0 |
| chr11 | 59350001 | 59450000 | 918  | 950  | 59400000 | 0.14653  | 0.032131 | 0 |
| chr11 | 59900001 | 60000000 | 629  | 808  | 59950000 | -0.16533 | 0.01916  | 0 |
| chr11 | 60700001 | 60800000 | 682  | 695  | 60750000 | 0.168722 | 0.016577 | 0 |
| chr11 | 60900001 | 61000000 | 448  | 463  | 60950000 | 0.14845  | 0.030425 | 0 |
| chr11 | 61000001 | 61100000 | 570  | 586  | 61050000 | 0.156024 | 0.024412 | 0 |
| chr11 | 61400001 | 61500000 | 768  | 786  | 61450000 | 0.16254  | 0.02007  | 0 |
| chr11 | 61450001 | 61550000 | 934  | 945  | 61500000 | 0.179071 | 0.011891 | 0 |
| chr11 | 62150001 | 62250000 | 587  | 595  | 62200000 | 0.176434 | 0.01296  | 0 |
| chr11 | 63350001 | 63450000 | 883  | 909  | 63400000 | 0.154096 | 0.025839 | 0 |
| chr11 | 63450001 | 63550000 | 927  | 961  | 63500000 | 0.143996 | 0.034502 | 0 |
| chr11 | 63750001 | 63850000 | 1203 | 1245 | 63800000 | 0.146454 | 0.0322   | 0 |

|       |          |          |      |      |          |          |          |   |
|-------|----------|----------|------|------|----------|----------|----------|---|
| chr11 | 63800001 | 63900000 | 1209 | 1262 | 63850000 | 0.134065 | 0.045222 | 0 |
| chr11 | 64300001 | 64400000 | 1230 | 1286 | 64350000 | 0.131731 | 0.048097 | 0 |
| chr11 | 64350001 | 64450000 | 1285 | 1329 | 64400000 | 0.14739  | 0.031357 | 0 |
| chr11 | 64400001 | 64500000 | 1262 | 1286 | 64450000 | 0.168784 | 0.016544 | 0 |
| chr11 | 64450001 | 64550000 | 1197 | 1243 | 64500000 | 0.14156  | 0.036916 | 0 |
| chr11 | 64500001 | 64600000 | 1145 | 1171 | 64550000 | 0.16357  | 0.019448 | 0 |
| chr11 | 64950001 | 65050000 | 976  | 1000 | 6.50E+07 | 0.160916 | 0.021086 | 0 |
| chr11 | 65200001 | 65300000 | 931  | 945  | 65250000 | 0.17443  | 0.013827 | 0 |
| chr11 | 65400001 | 65500000 | 837  | 876  | 65450000 | 0.13026  | 0.049983 | 0 |
| chr11 | 65500001 | 65600000 | 702  | 730  | 65550000 | 0.139538 | 0.039024 | 0 |
| chr11 | 65800001 | 65900000 | 684  | 704  | 65850000 | 0.154384 | 0.025621 | 0 |
| chr11 | 66450001 | 66550000 | 748  | 769  | 66500000 | 0.156018 | 0.024416 | 0 |
| chr11 | 66650001 | 66750000 | 667  | 686  | 66700000 | 0.155441 | 0.024836 | 0 |
| chr11 | 66750001 | 66850000 | 975  | 1017 | 66800000 | 0.135117 | 0.043972 | 0 |
| chr11 | 66950001 | 67050000 | 1024 | 1056 | 6.70E+07 | 0.151569 | 0.027814 | 0 |
| chr11 | 67300001 | 67400000 | 886  | 899  | 67350000 | 0.174949 | 0.013598 | 0 |
| chr11 | 67550001 | 67650000 | 92   | 118  | 67600000 | -0.16312 | 0.020481 | 0 |
| chr11 | 67750001 | 67850000 | 1030 | 1061 | 67800000 | 0.153183 | 0.026539 | 0 |
| chr11 | 67850001 | 67950000 | 1023 | 1036 | 67900000 | 0.177745 | 0.012419 | 0 |
| chr11 | 68200001 | 68300000 | 940  | 983  | 68250000 | 0.131432 | 0.048475 | 0 |
| chr11 | 68300001 | 68400000 | 985  | 997  | 68350000 | 0.178493 | 0.012119 | 0 |
| chr11 | 68700001 | 68800000 | 1021 | 1058 | 68750000 | 0.144606 | 0.033918 | 0 |
| chr11 | 69400001 | 69500000 | 1390 | 1436 | 69450000 | 0.148992 | 0.029957 | 0 |
| chr11 | 69500001 | 69600000 | 1229 | 1242 | 69550000 | 0.180783 | 0.011239 | 0 |
| chr11 | 69950001 | 70050000 | 1083 | 1110 | 7.00E+07 | 0.160437 | 0.021394 | 0 |
| chr11 | 70150001 | 70250000 | 1014 | 1026 | 70200000 | 0.17899  | 0.011923 | 0 |
| chr11 | 70200001 | 70300000 | 1022 | 1048 | 70250000 | 0.15972  | 0.021862 | 0 |
| chr11 | 70250001 | 70350000 | 1080 | 1096 | 70300000 | 0.174747 | 0.013687 | 0 |
| chr11 | 70350001 | 70450000 | 1043 | 1087 | 70400000 | 0.13635  | 0.042544 | 0 |
| chr11 | 71100001 | 71200000 | 1120 | 1148 | 71150000 | 0.160339 | 0.021457 | 0 |
| chr11 | 71550001 | 71650000 | 472  | 484  | 71600000 | 0.159743 | 0.021846 | 0 |
| chr11 | 71600001 | 71700000 | 1014 | 1031 | 71650000 | 0.171976 | 0.014957 | 0 |
| chr11 | 71750001 | 71850000 | 1339 | 1372 | 71800000 | 0.160839 | 0.021136 | 0 |
| chr11 | 71900001 | 72000000 | 1339 | 1360 | 71950000 | 0.173512 | 0.014241 | 0 |
| chr11 | 72300001 | 72400000 | 1773 | 1801 | 72350000 | 0.173357 | 0.014311 | 0 |
| chr11 | 72350001 | 72450000 | 1685 | 1731 | 72400000 | 0.157106 | 0.023641 | 0 |
| chr11 | 72450001 | 72550000 | 1475 | 1541 | 72500000 | 0.132811 | 0.046749 | 0 |
| chr11 | 72850001 | 72950000 | 1522 | 1585 | 72900000 | 0.137449 | 0.041303 | 0 |
| chr11 | 72950001 | 73050000 | 1296 | 1346 | 7.30E+07 | 0.14135  | 0.03713  | 0 |
| chr11 | 73000001 | 73100000 | 1215 | 1235 | 73050000 | 0.172408 | 0.014752 | 0 |
| chr11 | 73400001 | 73500000 | 551  | 566  | 73450000 | 0.157213 | 0.023565 | 0 |
| chr11 | 73700001 | 73800000 | 924  | 947  | 73750000 | 0.160491 | 0.021359 | 0 |
| chr11 | 74600001 | 74700000 | 998  | 1016 | 74650000 | 0.170174 | 0.015836 | 0 |
| chr11 | 74750001 | 74850000 | 687  | 869  | 74800000 | -0.14308 | 0.036343 | 0 |
| chr11 | 74900001 | 75000000 | 1134 | 1183 | 74950000 | 0.134934 | 0.044189 | 0 |
| chr11 | 74950001 | 75050000 | 1044 | 1068 | 7.50E+07 | 0.163173 | 0.019686 | 0 |
| chr11 | 75050001 | 75150000 | 1036 | 1059 | 75100000 | 0.164284 | 0.019026 | 0 |

|       |          |          |      |      |          |          |          |   |
|-------|----------|----------|------|------|----------|----------|----------|---|
| chr11 | 75100001 | 75200000 | 1209 | 1229 | 75150000 | 0.172292 | 0.014807 | 0 |
| chr11 | 75250001 | 75350000 | 1133 | 1185 | 75300000 | 0.131224 | 0.048741 | 0 |
| chr11 | 75400001 | 75500000 | 1075 | 1095 | 75450000 | 0.169369 | 0.016243 | 0 |
| chr11 | 75450001 | 75550000 | 1244 | 1286 | 75500000 | 0.148059 | 0.030766 | 0 |
| chr11 | 77450001 | 77550000 | 580  | 603  | 77500000 | 0.139858 | 0.038684 | 0 |
| chr11 | 77500001 | 77600000 | 558  | 570  | 77550000 | 0.165266 | 0.018459 | 0 |
| chr11 | 77550001 | 77650000 | 335  | 343  | 77600000 | 0.161916 | 0.020456 | 0 |
| chr11 | 77600001 | 77700000 | 269  | 274  | 77650000 | 0.169393 | 0.016231 | 0 |
| chr11 | 78000001 | 78100000 | 1417 | 1799 | 78050000 | -0.14839 | 0.03138  | 0 |
| chr11 | 78400001 | 78500000 | 1521 | 1930 | 78450000 | -0.14762 | 0.032067 | 0 |
| chr11 | 78450001 | 78550000 | 1724 | 2203 | 78500000 | -0.15775 | 0.02401  | 0 |
| chr11 | 78750001 | 78850000 | 1517 | 1938 | 78800000 | -0.15738 | 0.024265 | 0 |
| chr11 | 79100001 | 79200000 | 1807 | 2271 | 79150000 | -0.13377 | 0.0466   | 0 |
| chr11 | 79250001 | 79350000 | 1931 | 2449 | 79300000 | -0.14688 | 0.032731 | 0 |
| chr11 | 79800001 | 79900000 | 615  | 778  | 79850000 | -0.14322 | 0.036206 | 0 |
| chr11 | 79850001 | 79950000 | 625  | 799  | 79900000 | -0.15838 | 0.023571 | 0 |
| chr11 | 79900001 | 80000000 | 597  | 771  | 79950000 | -0.17304 | 0.015118 | 0 |
| chr11 | 80150001 | 80250000 | 593  | 752  | 80200000 | -0.14674 | 0.032863 | 0 |
| chr11 | 80450001 | 80550000 | 755  | 981  | 80500000 | -0.18181 | 0.011431 | 0 |
| chr11 | 80600001 | 80700000 | 806  | 1029 | 80650000 | -0.15643 | 0.02495  | 0 |
| chr11 | 80750001 | 80850000 | 783  | 989  | 80800000 | -0.141   | 0.038464 | 0 |
| chr11 | 80900001 | 81000000 | 972  | 1245 | 80950000 | -0.16115 | 0.021716 | 0 |
| chr11 | 81100001 | 81200000 | 1048 | 1316 | 81150000 | -0.13256 | 0.04809  | 0 |
| chr11 | 81250001 | 81350000 | 901  | 1131 | 81300000 | -0.13204 | 0.048743 | 0 |
| chr11 | 81300001 | 81400000 | 816  | 1028 | 81350000 | -0.13724 | 0.042537 | 0 |
| chr11 | 81700001 | 81800000 | 831  | 1066 | 81750000 | -0.16332 | 0.020355 | 0 |
| chr11 | 82850001 | 82950000 | 855  | 871  | 82900000 | 0.169215 | 0.016322 | 0 |
| chr11 | 83850001 | 83950000 | 633  | 819  | 83900000 | -0.17569 | 0.013906 | 0 |
| chr11 | 83950001 | 84050000 | 703  | 912  | 8.40E+07 | -0.17955 | 0.012299 | 0 |
| chr11 | 84400001 | 84500000 | 625  | 807  | 84450000 | -0.17275 | 0.015254 | 0 |
| chr11 | 84450001 | 84550000 | 636  | 803  | 84500000 | -0.14041 | 0.039076 | 0 |
| chr11 | 84950001 | 85050000 | 635  | 797  | 8.50E+07 | -0.13186 | 0.048966 | 0 |
| chr11 | 85200001 | 85300000 | 606  | 769  | 85250000 | -0.1477  | 0.031991 | 0 |
| chr11 | 85650001 | 85750000 | 939  | 982  | 85700000 | 0.131365 | 0.048561 | 0 |
| chr11 | 86350001 | 86450000 | 1270 | 1326 | 86400000 | 0.133711 | 0.04565  | 0 |
| chr11 | 87200001 | 87300000 | 855  | 1103 | 87250000 | -0.17147 | 0.015873 | 0 |
| chr11 | 87250001 | 87350000 | 710  | 906  | 87300000 | -0.15573 | 0.025462 | 0 |
| chr11 | 87500001 | 87600000 | 639  | 826  | 87550000 | -0.17436 | 0.014502 | 0 |
| chr11 | 88050001 | 88150000 | 854  | 876  | 88100000 | 0.159268 | 0.022161 | 0 |
| chr11 | 88500001 | 88600000 | 441  | 570  | 88550000 | -0.17422 | 0.014567 | 0 |
| chr11 | 88600001 | 88700000 | 172  | 220  | 88650000 | -0.15913 | 0.023054 | 0 |
| chr11 | 88650001 | 88750000 | 170  | 216  | 88700000 | -0.14953 | 0.030391 | 0 |
| chr11 | 88900001 | 89000000 | 488  | 633  | 88950000 | -0.17936 | 0.012372 | 0 |
| chr11 | 88950001 | 89050000 | 286  | 362  | 8.90E+07 | -0.14401 | 0.035431 | 0 |
| chr11 | 89800001 | 89900000 | 368  | 474  | 89850000 | -0.16922 | 0.017019 | 0 |
| chr11 | 90150001 | 90250000 | 618  | 794  | 90200000 | -0.16557 | 0.019024 | 0 |
| chr11 | 90200001 | 90300000 | 648  | 820  | 90250000 | -0.14367 | 0.035767 | 0 |

|       |          |          |     |      |          |          |          |   |
|-------|----------|----------|-----|------|----------|----------|----------|---|
| chr11 | 90400001 | 90500000 | 543 | 697  | 90450000 | -0.16424 | 0.0198   | 0 |
| chr11 | 90450001 | 90550000 | 608 | 767  | 90500000 | -0.13919 | 0.040376 | 0 |
| chr11 | 90500001 | 90600000 | 641 | 815  | 90550000 | -0.15051 | 0.029563 | 0 |
| chr11 | 90550001 | 90650000 | 670 | 860  | 90600000 | -0.16421 | 0.019819 | 0 |
| chr11 | 90900001 | 91000000 | 604 | 785  | 90950000 | -0.18218 | 0.011295 | 0 |
| chr11 | 91050001 | 91150000 | 579 | 732  | 91100000 | -0.14232 | 0.037109 | 0 |
| chr11 | 91100001 | 91200000 | 582 | 732  | 91150000 | -0.13486 | 0.045287 | 0 |
| chr11 | 91300001 | 91400000 | 585 | 745  | 91350000 | -0.15284 | 0.027669 | 0 |
| chr11 | 91350001 | 91450000 | 606 | 769  | 91400000 | -0.1477  | 0.031991 | 0 |
| chr11 | 95000001 | 95100000 | 886 | 1142 | 95050000 | -0.17022 | 0.016501 | 0 |
| chr11 | 95100001 | 95200000 | 921 | 1168 | 95150000 | -0.1468  | 0.032802 | 0 |
| chr11 | 95200001 | 95300000 | 909 | 1172 | 95250000 | -0.17066 | 0.016279 | 0 |
| chr11 | 96200001 | 96300000 | 741 | 936  | 96250000 | -0.14107 | 0.038384 | 0 |
| chr11 | 96250001 | 96350000 | 308 | 395  | 96300000 | -0.16296 | 0.020578 | 0 |
| chr11 | 97400001 | 97500000 | 626 | 801  | 97450000 | -0.15968 | 0.022687 | 0 |
| chr11 | 97550001 | 97650000 | 613 | 778  | 97600000 | -0.14792 | 0.031798 | 0 |
| chr11 | 97700001 | 97800000 | 634 | 825  | 97750000 | -0.18395 | 0.010663 | 0 |
| chr11 | 97800001 | 97900000 | 630 | 795  | 97850000 | -0.13964 | 0.039894 | 0 |
| chr11 | 98850001 | 98950000 | 627 | 802  | 98900000 | -0.15917 | 0.023025 | 0 |
| chr11 | 99050001 | 99150000 | 656 | 827  | 99100000 | -0.13823 | 0.041429 | 0 |
| chr11 | 99200001 | 99300000 | 699 | 882  | 99250000 | -0.13952 | 0.040019 | 0 |
| chr11 | 99350001 | 99450000 | 646 | 835  | 99400000 | -0.17428 | 0.01454  | 0 |
| chr11 | 1E+08    | 1E+08    | 654 | 830  | 1E+08    | -0.14786 | 0.031853 | 0 |
| chr11 | 1E+08    | 1E+08    | 596 | 767  | 1E+08    | -0.16795 | 0.017693 | 0 |
| chr11 | 1E+08    | 1E+08    | 589 | 751  | 1E+08    | -0.15458 | 0.02632  | 0 |
| chr11 | 1E+08    | 1.01E+08 | 643 | 828  | 1.01E+08 | -0.16885 | 0.017213 | 0 |
| chr11 | 1.01E+08 | 1.01E+08 | 662 | 852  | 1.01E+08 | -0.16806 | 0.017635 | 0 |
| chr11 | 1.01E+08 | 1.01E+08 | 641 | 823  | 1.01E+08 | -0.16461 | 0.019586 | 0 |
| chr11 | 1.02E+08 | 1.02E+08 | 558 | 705  | 1.02E+08 | -0.1414  | 0.03805  | 0 |
| chr11 | 1.02E+08 | 1.02E+08 | 662 | 675  | 1.02E+08 | 0.167907 | 0.017005 | 0 |
| chr11 | 1.02E+08 | 1.02E+08 | 589 | 612  | 1.02E+08 | 0.140699 | 0.037802 | 0 |
| chr11 | 1.03E+08 | 1.03E+08 | 598 | 616  | 1.03E+08 | 0.153178 | 0.026542 | 0 |
| chr11 | 1.03E+08 | 1.03E+08 | 462 | 581  | 1.03E+08 | -0.13468 | 0.0455   | 0 |
| chr11 | 1.03E+08 | 1.03E+08 | 525 | 663  | 1.03E+08 | -0.14073 | 0.038742 | 0 |
| chr11 | 1.04E+08 | 1.04E+08 | 490 | 625  | 1.04E+08 | -0.15511 | 0.025921 | 0 |
| chr11 | 1.04E+08 | 1.04E+08 | 454 | 577  | 1.04E+08 | -0.14992 | 0.030065 | 0 |
| chr11 | 1.04E+08 | 1.04E+08 | 467 | 588  | 1.04E+08 | -0.13643 | 0.043455 | 0 |
| chr11 | 1.04E+08 | 1.04E+08 | 442 | 556  | 1.04E+08 | -0.13508 | 0.045033 | 0 |
| chr11 | 1.04E+08 | 1.04E+08 | 421 | 534  | 1.04E+08 | -0.14706 | 0.032573 | 0 |
| chr11 | 1.05E+08 | 1.05E+08 | 507 | 643  | 1.05E+08 | -0.14687 | 0.032742 | 0 |
| chr11 | 1.05E+08 | 1.05E+08 | 457 | 583  | 1.05E+08 | -0.15534 | 0.025751 | 0 |
| chr11 | 1.05E+08 | 1.05E+08 | 451 | 582  | 1.05E+08 | -0.17193 | 0.01565  | 0 |
| chr11 | 1.05E+08 | 1.05E+08 | 445 | 578  | 1.05E+08 | -0.1813  | 0.011622 | 0 |
| chr11 | 1.05E+08 | 1.05E+08 | 549 | 706  | 1.05E+08 | -0.1669  | 0.018271 | 0 |
| chr11 | 1.06E+08 | 1.06E+08 | 481 | 620  | 1.06E+08 | -0.17027 | 0.016477 | 0 |
| chr11 | 1.06E+08 | 1.06E+08 | 493 | 627  | 1.06E+08 | -0.15091 | 0.029228 | 0 |
| chr11 | 1.06E+08 | 1.06E+08 | 476 | 614  | 1.06E+08 | -0.17131 | 0.015951 | 0 |

|       |          |          |     |     |          |          |          |   |
|-------|----------|----------|-----|-----|----------|----------|----------|---|
| chr11 | 1.07E+08 | 1.07E+08 | 466 | 604 | 1.07E+08 | -0.17826 | 0.012818 | 0 |
| chr11 | 1.08E+08 | 1.08E+08 | 568 | 594 | 1.08E+08 | 0.131391 | 0.048528 | 0 |
| chr11 | 1.08E+08 | 1.08E+08 | 437 | 555 | 1.08E+08 | -0.14889 | 0.030944 | 0 |
| chr11 | 1.09E+08 | 1.09E+08 | 443 | 453 | 1.09E+08 | 0.163759 | 0.019336 | 0 |
| chr11 | 1.09E+08 | 1.09E+08 | 436 | 553 | 1.09E+08 | -0.14699 | 0.032634 | 0 |
| chr11 | 1.1E+08  | 1.1E+08  | 529 | 676 | 1.1E+08  | -0.15779 | 0.023978 | 0 |
| chr11 | 1.1E+08  | 1.1E+08  | 656 | 681 | 1.1E+08  | 0.142004 | 0.036466 | 0 |
| chr11 | 1.11E+08 | 1.11E+08 | 504 | 648 | 1.11E+08 | -0.16661 | 0.018434 | 0 |
| chr11 | 1.11E+08 | 1.11E+08 | 514 | 653 | 1.11E+08 | -0.14935 | 0.030547 | 0 |
| chr11 | 1.12E+08 | 1.12E+08 | 689 | 709 | 1.12E+08 | 0.154681 | 0.025398 | 0 |
| chr11 | 1.14E+08 | 1.14E+08 | 641 | 662 | 1.14E+08 | 0.149456 | 0.029561 | 0 |
| chr11 | 1.14E+08 | 1.14E+08 | 646 | 669 | 1.14E+08 | 0.145491 | 0.033086 | 0 |
| chr11 | 1.14E+08 | 1.14E+08 | 505 | 648 | 1.14E+08 | -0.16375 | 0.020098 | 0 |
| chr11 | 1.15E+08 | 1.15E+08 | 514 | 667 | 1.15E+08 | -0.17996 | 0.012138 | 0 |
| chr11 | 1.16E+08 | 1.16E+08 | 538 | 698 | 1.16E+08 | -0.17966 | 0.012255 | 0 |
| chr11 | 1.16E+08 | 1.16E+08 | 537 | 677 | 1.16E+08 | -0.13827 | 0.041383 | 0 |
| chr11 | 1.17E+08 | 1.17E+08 | 662 | 679 | 1.17E+08 | 0.159383 | 0.022084 | 0 |
| chr11 | 1.17E+08 | 1.17E+08 | 627 | 654 | 1.17E+08 | 0.135138 | 0.043949 | 0 |
| chr11 | 1.17E+08 | 1.17E+08 | 639 | 668 | 1.17E+08 | 0.131931 | 0.047845 | 0 |
| chr11 | 1.17E+08 | 1.18E+08 | 763 | 771 | 1.18E+08 | 0.180915 | 0.01119  | 0 |
| chr11 | 1.18E+08 | 1.18E+08 | 663 | 685 | 1.18E+08 | 0.148868 | 0.030063 | 0 |
| chr11 | 1.18E+08 | 1.18E+08 | 628 | 645 | 1.18E+08 | 0.157428 | 0.023415 | 0 |
| chr11 | 1.19E+08 | 1.19E+08 | 614 | 640 | 1.19E+08 | 0.13613  | 0.042797 | 0 |
| chr11 | 1.19E+08 | 1.19E+08 | 682 | 702 | 1.19E+08 | 0.154264 | 0.025712 | 0 |
| chr11 | 1.19E+08 | 1.19E+08 | 601 | 615 | 1.19E+08 | 0.162742 | 0.019947 | 0 |
| chr11 | 1.19E+08 | 1.19E+08 | 713 | 723 | 1.19E+08 | 0.175869 | 0.013199 | 0 |
| chr11 | 1.19E+08 | 1.19E+08 | 688 | 704 | 1.19E+08 | 0.162796 | 0.019914 | 0 |
| chr11 | 1.19E+08 | 1.19E+08 | 800 | 830 | 1.19E+08 | 0.142852 | 0.035619 | 0 |
| chr11 | 1.2E+08  | 1.2E+08  | 773 | 788 | 1.2E+08  | 0.168236 | 0.016831 | 0 |
| chr11 | 1.2E+08  | 1.2E+08  | 760 | 793 | 1.2E+08  | 0.134642 | 0.044534 | 0 |
| chr11 | 1.2E+08  | 1.2E+08  | 714 | 741 | 1.2E+08  | 0.142414 | 0.036055 | 0 |
| chr11 | 1.2E+08  | 1.2E+08  | 725 | 735 | 1.2E+08  | 0.1762   | 0.013059 | 0 |
| chr11 | 1.2E+08  | 1.2E+08  | 749 | 762 | 1.20E+08 | 0.171138 | 0.01536  | 0 |
| chr11 | 1.2E+08  | 1.2E+08  | 805 | 817 | 1.2E+08  | 0.174616 | 0.013745 | 0 |
| chr11 | 1.2E+08  | 1.2E+08  | 806 | 821 | 1.2E+08  | 0.169361 | 0.016247 | 0 |
| chr11 | 1.21E+08 | 1.21E+08 | 676 | 691 | 1.21E+08 | 0.164301 | 0.019017 | 0 |
| chr11 | 1.21E+08 | 1.21E+08 | 612 | 622 | 1.21E+08 | 0.17258  | 0.014672 | 0 |
| chr11 | 1.22E+08 | 1.22E+08 | 610 | 635 | 1.22E+08 | 0.138016 | 0.040674 | 0 |
| chr11 | 1.22E+08 | 1.22E+08 | 513 | 661 | 1.22E+08 | -0.16973 | 0.016753 | 0 |
| chr11 | 1.22E+08 | 1.22E+08 | 493 | 626 | 1.22E+08 | -0.14861 | 0.031188 | 0 |
| chr11 | 1.24E+08 | 1.24E+08 | 480 | 615 | 1.24E+08 | -0.16159 | 0.021437 | 0 |
| chr11 | 1.24E+08 | 1.24E+08 | 459 | 592 | 1.24E+08 | -0.17114 | 0.016038 | 0 |
| chr11 | 1.25E+08 | 1.25E+08 | 655 | 679 | 1.25E+08 | 0.144046 | 0.034454 | 0 |
| chr11 | 1.25E+08 | 1.25E+08 | 709 | 723 | 1.25E+08 | 0.167753 | 0.017087 | 0 |
| chr11 | 1.26E+08 | 1.26E+08 | 525 | 545 | 1.26E+08 | 0.142024 | 0.036446 | 0 |
| chr11 | 1.26E+08 | 1.26E+08 | 691 | 718 | 1.26E+08 | 0.140665 | 0.037837 | 0 |
| chr11 | 1.26E+08 | 1.26E+08 | 709 | 734 | 1.26E+08 | 0.145969 | 0.032644 | 0 |

|       |          |          |      |      |          |          |          |   |
|-------|----------|----------|------|------|----------|----------|----------|---|
| chr11 | 1.26E+08 | 1.26E+08 | 685  | 697  | 1.26E+08 | 0.170908 | 0.015472 | 0 |
| chr11 | 1.26E+08 | 1.26E+08 | 679  | 687  | 1.26E+08 | 0.179065 | 0.011894 | 0 |
| chr11 | 1.27E+08 | 1.27E+08 | 446  | 562  | 1.27E+08 | -0.13756 | 0.042169 | 0 |
| chr11 | 1.27E+08 | 1.27E+08 | 454  | 573  | 1.27E+08 | -0.13988 | 0.039638 | 0 |
| chr11 | 1.28E+08 | 1.28E+08 | 381  | 485  | 1.28E+08 | -0.15223 | 0.028155 | 0 |
| chr11 | 1.28E+08 | 1.28E+08 | 446  | 560  | 1.28E+08 | -0.13242 | 0.048262 | 0 |
| chr11 | 1.28E+08 | 1.28E+08 | 505  | 636  | 1.28E+08 | -0.13678 | 0.043054 | 0 |
| chr11 | 1.29E+08 | 1.29E+08 | 460  | 593  | 1.29E+08 | -0.17044 | 0.016392 | 0 |
| chr11 | 1.29E+08 | 1.29E+08 | 458  | 575  | 1.29E+08 | -0.13225 | 0.048473 | 0 |
| chr11 | 1.3E+08  | 1.3E+08  | 663  | 683  | 1.3E+08  | 0.153086 | 0.026613 | 0 |
| chr11 | 1.3E+08  | 1.3E+08  | 649  | 675  | 1.3E+08  | 0.139294 | 0.039284 | 0 |
| chr11 | 1.3E+08  | 1.3E+08  | 627  | 646  | 1.30E+08 | 0.152894 | 0.026763 | 0 |
| chr11 | 1.3E+08  | 1.3E+08  | 577  | 593  | 1.3E+08  | 0.156502 | 0.024068 | 0 |
| chr11 | 1.31E+08 | 1.31E+08 | 523  | 659  | 1.31E+08 | -0.1375  | 0.042235 | 0 |
| chr11 | 1.32E+08 | 1.32E+08 | 508  | 659  | 1.32E+08 | -0.17949 | 0.012322 | 0 |
| chr11 | 1.32E+08 | 1.32E+08 | 538  | 555  | 1.32E+08 | 0.151081 | 0.028209 | 0 |
| chr11 | 1.32E+08 | 1.32E+08 | 466  | 586  | 1.32E+08 | -0.13461 | 0.045589 | 0 |
| chr11 | 1.32E+08 | 1.32E+08 | 412  | 517  | 1.32E+08 | -0.13156 | 0.049351 | 0 |
| chr11 | 1.33E+08 | 1.33E+08 | 454  | 588  | 1.33E+08 | -0.17716 | 0.013274 | 0 |
| chr11 | 1.33E+08 | 1.33E+08 | 470  | 605  | 1.33E+08 | -0.16831 | 0.017499 | 0 |
| chr11 | 1.33E+08 | 1.33E+08 | 458  | 584  | 1.33E+08 | -0.15466 | 0.026263 | 0 |
| chr11 | 1.33E+08 | 1.33E+08 | 498  | 627  | 1.33E+08 | -0.13636 | 0.043539 | 0 |
| chr11 | 1.33E+08 | 1.34E+08 | 489  | 625  | 1.33E+08 | -0.15806 | 0.023791 | 0 |
| chr11 | 1.33E+08 | 1.34E+08 | 432  | 542  | 1.34E+08 | -0.1313  | 0.049681 | 0 |
| chr11 | 1.35E+08 | 1.35E+08 | 552  | 709  | 1.35E+08 | -0.16515 | 0.019264 | 0 |
| chr11 | 1.35E+08 | 1.35E+08 | 448  | 452  | 1.35E+08 | 0.183139 | 0.010393 | 0 |
| chr11 | 1.35E+08 | 1.35E+08 | 420  | 431  | 1.35E+08 | 0.158664 | 0.022566 | 0 |
| chr12 | 450001   | 550000   | 775  | 781  | 5.00E+05 | 0.184837 | 0.009818 | 0 |
| chr12 | 1700001  | 1800000  | 1029 | 1014 | 1750000  | 0.217148 | 0.003075 | 0 |
| chr12 | 1750001  | 1850000  | 939  | 944  | 1800000  | 0.188301 | 0.00873  | 0 |
| chr12 | 1800001  | 1900000  | 927  | 918  | 1850000  | 0.210038 | 0.004021 | 0 |
| chr12 | 1850001  | 1950000  | 1130 | 1061 | 1900000  | 0.286861 | 0.000152 | 0 |
| chr12 | 3000001  | 3100000  | 893  | 870  | 3050000  | 0.233608 | 0.001608 | 0 |
| chr12 | 6400001  | 6500000  | 1168 | 1110 | 6450000  | 0.269444 | 0.000343 | 0 |
| chr12 | 6450001  | 6550000  | 1099 | 1028 | 6500000  | 0.292314 | 0.000116 | 0 |
| chr12 | 6500001  | 6600000  | 995  | 987  | 6550000  | 0.207609 | 0.004399 | 0 |
| chr12 | 6550001  | 6650000  | 1003 | 996  | 6600000  | 0.206067 | 0.004656 | 0 |
| chr12 | 6750001  | 6850000  | 1020 | 980  | 6800000  | 0.253679 | 0.000692 | 0 |
| chr12 | 6800001  | 6900000  | 1036 | 1015 | 6850000  | 0.225507 | 0.002223 | 0 |
| chr12 | 6950001  | 7050000  | 1101 | 1030 | 7.00E+06 | 0.292133 | 0.000117 | 0 |
| chr12 | 7000001  | 7100000  | 1190 | 1080 | 7050000  | 0.335893 | 1.21E-05 | 0 |
| chr12 | 8050001  | 8150000  | 723  | 688  | 8100000  | 0.26755  | 0.000374 | 0 |
| chr12 | 8100001  | 8200000  | 791  | 772  | 8150000  | 0.23104  | 0.001784 | 0 |
| chr12 | 8300001  | 8400000  | 177  | 175  | 8350000  | 0.212357 | 0.003687 | 0 |
| chr12 | 9600001  | 9700000  | 170  | 161  | 9650000  | 0.274437 | 0.000273 | 0 |
| chr12 | 10500001 | 10600000 | 667  | 671  | 10550000 | 0.187337 | 0.009022 | 0 |
| chr12 | 11150001 | 11250000 | 514  | 510  | 11200000 | 0.207234 | 0.004461 | 0 |

|       |          |          |      |      |          |          |          |   |
|-------|----------|----------|------|------|----------|----------|----------|---|
| chr12 | 11250001 | 11350000 | 732  | 734  | 11300000 | 0.192027 | 0.007681 | 0 |
| chr12 | 12850001 | 12950000 | 1040 | 1003 | 12900000 | 0.248225 | 0.000876 | 0 |
| chr12 | 12900001 | 13000000 | 1005 | 988  | 12950000 | 0.220576 | 0.002696 | 0 |
| chr12 | 13000001 | 13100000 | 939  | 929  | 13050000 | 0.21141  | 0.003821 | 0 |
| chr12 | 13050001 | 13150000 | 1089 | 1044 | 13100000 | 0.256845 | 0.000603 | 0 |
| chr12 | 14450001 | 14550000 | 658  | 659  | 14500000 | 0.193772 | 0.007228 | 0 |
| chr12 | 15500001 | 15600000 | 643  | 865  | 15550000 | -0.23192 | 0.001904 | 0 |
| chr12 | 17200001 | 17300000 | 589  | 779  | 17250000 | -0.20739 | 0.004773 | 0 |
| chr12 | 17250001 | 17350000 | 565  | 750  | 17300000 | -0.21268 | 0.003942 | 0 |
| chr12 | 17300001 | 17400000 | 571  | 767  | 17350000 | -0.22977 | 0.00207  | 0 |
| chr12 | 18750001 | 18850000 | 625  | 842  | 18800000 | -0.234   | 0.001755 | 0 |
| chr12 | 20600001 | 20700000 | 1003 | 975  | 20650000 | 0.236811 | 0.001411 | 0 |
| chr12 | 20650001 | 20750000 | 1045 | 1014 | 20700000 | 0.239408 | 0.001268 | 0 |
| chr12 | 21600001 | 21700000 | 913  | 900  | 21650000 | 0.216653 | 0.003134 | 0 |
| chr12 | 22050001 | 22150000 | 607  | 820  | 22100000 | -0.23796 | 0.0015   | 0 |
| chr12 | 23950001 | 24050000 | 605  | 809  | 2.40E+07 | -0.22324 | 0.00266  | 0 |
| chr12 | 24500001 | 24600000 | 664  | 875  | 24550000 | -0.20214 | 0.005752 | 0 |
| chr12 | 25850001 | 25950000 | 697  | 929  | 25900000 | -0.21856 | 0.003173 | 0 |
| chr12 | 27100001 | 27200000 | 913  | 917  | 27150000 | 0.189656 | 0.008335 | 0 |
| chr12 | 28900001 | 29000000 | 615  | 808  | 28950000 | -0.19781 | 0.00669  | 0 |
| chr12 | 30100001 | 30200000 | 659  | 880  | 30150000 | -0.22126 | 0.002867 | 0 |
| chr12 | 31200001 | 31300000 | 160  | 138  | 31250000 | 0.409367 | 1.48E-07 | 0 |
| chr12 | 31250001 | 31350000 | 114  | 109  | 31300000 | 0.260669 | 0.000509 | 0 |
| chr12 | 34000001 | 34100000 | 459  | 637  | 34050000 | -0.27684 | 0.000288 | 0 |
| chr12 | 34050001 | 34150000 | 372  | 522  | 34100000 | -0.29278 | 0.000138 | 0 |
| chr12 | 34450001 | 34550000 | 1144 | 1109 | 34500000 | 0.240791 | 0.001197 | 0 |
| chr12 | 34750001 | 34850000 | 538  | 725  | 34800000 | -0.23441 | 0.001727 | 0 |
| chr12 | 34800001 | 34900000 | 358  | 479  | 34850000 | -0.2241  | 0.002574 | 0 |
| chr12 | 34850001 | 34950000 | 41   | 41   | 34900000 | 0.195963 | 0.006694 | 0 |
| chr12 | 37800001 | 37900000 | 39   | 58   | 37850000 | -0.37662 | 1.71E-06 | 0 |
| chr12 | 37900001 | 38000000 | 202  | 266  | 37950000 | -0.20111 | 0.005964 | 0 |
| chr12 | 38250001 | 38350000 | 510  | 683  | 38300000 | -0.22543 | 0.002448 | 0 |
| chr12 | 38300001 | 38400000 | 546  | 726  | 38350000 | -0.21511 | 0.003606 | 0 |
| chr12 | 39050001 | 39150000 | 644  | 875  | 39100000 | -0.24626 | 0.001072 | 0 |
| chr12 | 39100001 | 39200000 | 568  | 797  | 39150000 | -0.29273 | 0.000139 | 0 |
| chr12 | 39550001 | 39650000 | 559  | 739  | 39600000 | -0.20676 | 0.004882 | 0 |
| chr12 | 40000001 | 40100000 | 609  | 811  | 40050000 | -0.2173  | 0.003325 | 0 |
| chr12 | 40750001 | 40850000 | 577  | 837  | 40800000 | -0.34069 | 1.25E-05 | 0 |
| chr12 | 40800001 | 40900000 | 625  | 835  | 40850000 | -0.22196 | 0.002793 | 0 |
| chr12 | 41400001 | 41500000 | 555  | 736  | 41450000 | -0.21125 | 0.004152 | 0 |
| chr12 | 41500001 | 41600000 | 567  | 741  | 41550000 | -0.19016 | 0.008679 | 0 |
| chr12 | 42200001 | 42300000 | 605  | 830  | 42250000 | -0.26021 | 0.000597 | 0 |
| chr12 | 42250001 | 42350000 | 666  | 906  | 42300000 | -0.24803 | 0.000997 | 0 |
| chr12 | 42400001 | 42500000 | 617  | 823  | 42450000 | -0.21966 | 0.003045 | 0 |
| chr12 | 43150001 | 43250000 | 661  | 868  | 43200000 | -0.19708 | 0.006859 | 0 |
| chr12 | 44300001 | 44400000 | 636  | 850  | 44350000 | -0.22247 | 0.002739 | 0 |
| chr12 | 44550001 | 44650000 | 585  | 811  | 44600000 | -0.2753  | 0.000308 | 0 |

|       |          |          |      |      |          |          |          |   |
|-------|----------|----------|------|------|----------|----------|----------|---|
| chr12 | 44900001 | 45000000 | 624  | 817  | 44950000 | -0.19283 | 0.007933 | 0 |
| chr12 | 45300001 | 45400000 | 606  | 797  | 45350000 | -0.1993  | 0.006352 | 0 |
| chr12 | 45600001 | 45700000 | 940  | 929  | 45650000 | 0.212945 | 0.003607 | 0 |
| chr12 | 45900001 | 46000000 | 705  | 963  | 45950000 | -0.25395 | 0.000779 | 0 |
| chr12 | 45950001 | 46050000 | 743  | 975  | 4.60E+07 | -0.19608 | 0.0071   | 0 |
| chr12 | 46450001 | 46550000 | 799  | 1045 | 46500000 | -0.19127 | 0.008361 | 0 |
| chr12 | 47950001 | 48050000 | 743  | 978  | 4.80E+07 | -0.20051 | 0.00609  | 0 |
| chr12 | 48100001 | 48200000 | 1387 | 1319 | 48150000 | 0.268486 | 0.000358 | 0 |
| chr12 | 48150001 | 48250000 | 1311 | 1230 | 48200000 | 0.287972 | 0.000144 | 0 |
| chr12 | 48300001 | 48400000 | 1230 | 1212 | 48350000 | 0.217232 | 0.003066 | 0 |
| chr12 | 49050001 | 49150000 | 836  | 825  | 49100000 | 0.215072 | 0.003328 | 0 |
| chr12 | 49200001 | 49300000 | 948  | 941  | 49250000 | 0.206655 | 0.004557 | 0 |
| chr12 | 49300001 | 49400000 | 1107 | 1106 | 49350000 | 0.197267 | 0.006393 | 0 |
| chr12 | 49350001 | 49450000 | 1226 | 1193 | 49400000 | 0.235328 | 0.0015   | 0 |
| chr12 | 49400001 | 49500000 | 1136 | 1080 | 49450000 | 0.268895 | 0.000352 | 0 |
| chr12 | 49450001 | 49550000 | 964  | 878  | 49500000 | 0.330775 | 1.60E-05 | 0 |
| chr12 | 50150001 | 50250000 | 1095 | 1028 | 50200000 | 0.287054 | 0.00015  | 0 |
| chr12 | 50200001 | 50300000 | 1129 | 1122 | 50250000 | 0.204936 | 0.004853 | 0 |
| chr12 | 51150001 | 51250000 | 796  | 796  | 51200000 | 0.195963 | 0.006694 | 0 |
| chr12 | 51550001 | 51650000 | 899  | 900  | 51600000 | 0.194359 | 0.007081 | 0 |
| chr12 | 52350001 | 52450000 | 1161 | 1142 | 52400000 | 0.219768 | 0.002781 | 0 |
| chr12 | 52400001 | 52500000 | 1146 | 1095 | 52450000 | 0.261639 | 0.000488 | 0 |
| chr12 | 53350001 | 53450000 | 921  | 896  | 53400000 | 0.235665 | 0.001479 | 0 |
| chr12 | 53400001 | 53500000 | 1154 | 1058 | 53450000 | 0.321267 | 2.67E-05 | 0 |
| chr12 | 53450001 | 53550000 | 1061 | 1014 | 53500000 | 0.26133  | 0.000495 | 0 |
| chr12 | 53500001 | 53600000 | 1001 | 966  | 53550000 | 0.24731  | 0.00091  | 0 |
| chr12 | 53550001 | 53650000 | 1186 | 1167 | 53600000 | 0.219262 | 0.002836 | 0 |
| chr12 | 53600001 | 53700000 | 1105 | 1112 | 53650000 | 0.186853 | 0.009172 | 0 |
| chr12 | 53700001 | 53800000 | 960  | 960  | 53750000 | 0.195963 | 0.006694 | 0 |
| chr12 | 53750001 | 53850000 | 881  | 827  | 53800000 | 0.287218 | 0.000149 | 0 |
| chr12 | 53800001 | 53900000 | 1037 | 999  | 53850000 | 0.249822 | 0.000818 | 0 |
| chr12 | 54350001 | 54450000 | 1264 | 1271 | 54400000 | 0.187995 | 0.008822 | 0 |
| chr12 | 54550001 | 54650000 | 1095 | 1044 | 54600000 | 0.264772 | 0.000424 | 0 |
| chr12 | 54600001 | 54700000 | 1010 | 985  | 54650000 | 0.232123 | 0.001708 | 0 |
| chr12 | 54700001 | 54800000 | 1062 | 1047 | 54750000 | 0.216485 | 0.003154 | 0 |
| chr12 | 54750001 | 54850000 | 1156 | 1111 | 54800000 | 0.253246 | 0.000706 | 0 |
| chr12 | 54800001 | 54900000 | 1001 | 990  | 54850000 | 0.211905 | 0.00375  | 0 |
| chr12 | 56100001 | 56200000 | 1037 | 1033 | 56150000 | 0.201539 | 0.005489 | 0 |
| chr12 | 56250001 | 56350000 | 880  | 877  | 56300000 | 0.20089  | 0.005618 | 0 |
| chr12 | 56300001 | 56400000 | 1022 | 995  | 56350000 | 0.23459  | 0.001545 | 0 |
| chr12 | 56550001 | 56650000 | 718  | 712  | 56600000 | 0.20807  | 0.004325 | 0 |
| chr12 | 56600001 | 56700000 | 664  | 620  | 56650000 | 0.294878 | 0.000103 | 0 |
| chr12 | 56650001 | 56750000 | 656  | 626  | 56700000 | 0.263496 | 0.000449 | 0 |
| chr12 | 56850001 | 56950000 | 665  | 643  | 56900000 | 0.244499 | 0.001025 | 0 |
| chr12 | 57000001 | 57100000 | 847  | 833  | 57050000 | 0.220009 | 0.002755 | 0 |
| chr12 | 57050001 | 57150000 | 880  | 832  | 57100000 | 0.276883 | 0.000243 | 0 |
| chr12 | 57600001 | 57700000 | 761  | 762  | 57650000 | 0.194068 | 0.007154 | 0 |



|       |          |          |     |     |          |          |          |   |
|-------|----------|----------|-----|-----|----------|----------|----------|---|
| chr12 | 57850001 | 57950000 | 704 | 695 | 57900000 | 0.214525 | 0.003398 | 0 |
| chr12 | 58000001 | 58100000 | 613 | 607 | 58050000 | 0.210154 | 0.004004 | 0 |
| chr12 | 58050001 | 58150000 | 676 | 672 | 58100000 | 0.204525 | 0.004926 | 0 |
| chr12 | 58250001 | 58350000 | 647 | 647 | 58300000 | 0.195963 | 0.006694 | 0 |
| chr12 | 58300001 | 58400000 | 574 | 574 | 58350000 | 0.195963 | 0.006694 | 0 |
| chr12 | 58700001 | 58800000 | 535 | 536 | 58750000 | 0.193269 | 0.007356 | 0 |
| chr12 | 58800001 | 58900000 | 452 | 592 | 58850000 | -0.19331 | 0.007803 | 0 |
| chr12 | 58850001 | 58950000 | 468 | 637 | 58900000 | -0.24882 | 0.000965 | 0 |
| chr12 | 59000001 | 59100000 | 450 | 590 | 59050000 | -0.19483 | 0.007411 | 0 |
| chr12 | 59050001 | 59150000 | 407 | 579 | 59100000 | -0.31257 | 5.31E-05 | 0 |
| chr12 | 59100001 | 59200000 | 443 | 581 | 59150000 | -0.19527 | 0.0073   | 0 |
| chr12 | 59150001 | 59250000 | 429 | 563 | 59200000 | -0.19619 | 0.007072 | 0 |
| chr12 | 59650001 | 59750000 | 363 | 520 | 59700000 | -0.32258 | 3.21E-05 | 0 |
| chr12 | 59700001 | 59800000 | 398 | 540 | 59750000 | -0.24423 | 0.001165 | 0 |
| chr12 | 59950001 | 60050000 | 586 | 589 | 6.00E+07 | 0.188596 | 0.008643 | 0 |
| chr12 | 60850001 | 60950000 | 448 | 607 | 60900000 | -0.24223 | 0.001263 | 0 |
| chr12 | 60900001 | 61000000 | 430 | 607 | 60950000 | -0.3014  | 9.17E-05 | 0 |
| chr12 | 61150001 | 61250000 | 350 | 491 | 61200000 | -0.29241 | 0.000141 | 0 |
| chr12 | 61200001 | 61300000 | 366 | 500 | 61250000 | -0.25412 | 0.000774 | 0 |
| chr12 | 61400001 | 61500000 | 339 | 463 | 61450000 | -0.25376 | 0.000785 | 0 |
| chr12 | 61700001 | 61800000 | 381 | 501 | 61750000 | -0.19906 | 0.006406 | 0 |
| chr12 | 63750001 | 63850000 | 503 | 507 | 63800000 | 0.184536 | 0.009918 | 0 |
| chr12 | 63800001 | 63900000 | 493 | 493 | 63850000 | 0.195963 | 0.006694 | 0 |
| chr12 | 64050001 | 64150000 | 118 | 161 | 64100000 | -0.25231 | 0.000835 | 0 |
| chr12 | 65800001 | 65900000 | 610 | 606 | 65850000 | 0.205454 | 0.004762 | 0 |
| chr12 | 66300001 | 66400000 | 438 | 594 | 66350000 | -0.24357 | 0.001197 | 0 |
| chr12 | 66950001 | 67050000 | 417 | 560 | 6.70E+07 | -0.22942 | 0.002099 | 0 |
| chr12 | 67000001 | 67100000 | 454 | 618 | 67050000 | -0.24895 | 0.00096  | 0 |
| chr12 | 67200001 | 67300000 | 449 | 596 | 67250000 | -0.21263 | 0.003949 | 0 |
| chr12 | 68100001 | 68200000 | 450 | 614 | 68150000 | -0.25235 | 0.000833 | 0 |
| chr12 | 69100001 | 69200000 | 599 | 588 | 69150000 | 0.222703 | 0.002482 | 0 |
| chr12 | 69150001 | 69250000 | 607 | 571 | 69200000 | 0.284169 | 0.000173 | 0 |
| chr12 | 69900001 | 70000000 | 625 | 617 | 69950000 | 0.214549 | 0.003395 | 0 |
| chr12 | 71050001 | 71150000 | 512 | 668 | 71100000 | -0.18774 | 0.009409 | 0 |
| chr12 | 71100001 | 71200000 | 460 | 626 | 71150000 | -0.24857 | 0.000975 | 0 |
| chr12 | 71300001 | 71400000 | 481 | 641 | 71350000 | -0.21832 | 0.0032   | 0 |
| chr12 | 72650001 | 72750000 | 457 | 641 | 72700000 | -0.29217 | 0.000142 | 0 |
| chr12 | 72800001 | 72900000 | 423 | 558 | 72850000 | -0.20364 | 0.005455 | 0 |
| chr12 | 73450001 | 73550000 | 354 | 501 | 73500000 | -0.3051  | 7.66E-05 | 0 |
| chr12 | 73500001 | 73600000 | 310 | 454 | 73550000 | -0.35446 | 5.95E-06 | 0 |
| chr12 | 73550001 | 73650000 | 349 | 469 | 73600000 | -0.2304  | 0.00202  | 0 |
| chr12 | 73800001 | 73900000 | 349 | 490 | 73850000 | -0.29359 | 0.000133 | 0 |
| chr12 | 74000001 | 74100000 | 339 | 442 | 74050000 | -0.1868  | 0.009708 | 0 |
| chr12 | 74650001 | 74750000 | 365 | 479 | 74700000 | -0.19617 | 0.007078 | 0 |
| chr12 | 75100001 | 75200000 | 396 | 548 | 75150000 | -0.27271 | 0.000346 | 0 |
| chr12 | 75150001 | 75250000 | 403 | 532 | 75200000 | -0.20468 | 0.005258 | 0 |
| chr12 | 76250001 | 76350000 | 560 | 560 | 76300000 | 0.195963 | 0.006694 | 0 |

|       |          |          |     |     |          |          |          |   |
|-------|----------|----------|-----|-----|----------|----------|----------|---|
| chr12 | 76400001 | 76500000 | 631 | 635 | 76450000 | 0.186846 | 0.009173 | 0 |
| chr12 | 77950001 | 78050000 | 404 | 557 | 7.80E+07 | -0.26736 | 0.000438 | 0 |
| chr12 | 78000001 | 78100000 | 385 | 540 | 78050000 | -0.29214 | 0.000142 | 0 |
| chr12 | 78550001 | 78650000 | 396 | 537 | 78600000 | -0.24346 | 0.001202 | 0 |
| chr12 | 79100001 | 79200000 | 400 | 537 | 79150000 | -0.22896 | 0.002136 | 0 |
| chr12 | 79150001 | 79250000 | 400 | 539 | 79200000 | -0.23432 | 0.001733 | 0 |
| chr12 | 79450001 | 79550000 | 435 | 582 | 79500000 | -0.22404 | 0.00258  | 0 |
| chr12 | 80650001 | 80750000 | 418 | 552 | 80700000 | -0.2052  | 0.005162 | 0 |
| chr12 | 80700001 | 80800000 | 371 | 513 | 80750000 | -0.27158 | 0.000364 | 0 |
| chr12 | 81400001 | 81500000 | 340 | 469 | 81450000 | -0.26809 | 0.000425 | 0 |
| chr12 | 81450001 | 81550000 | 341 | 457 | 81500000 | -0.22646 | 0.002353 | 0 |
| chr12 | 81500001 | 81600000 | 402 | 531 | 81550000 | -0.20555 | 0.005098 | 0 |
| chr12 | 81550001 | 81650000 | 407 | 554 | 81600000 | -0.24889 | 0.000962 | 0 |
| chr12 | 81600001 | 81700000 | 405 | 530 | 81650000 | -0.19211 | 0.008128 | 0 |
| chr12 | 82050001 | 82150000 | 374 | 518 | 82100000 | -0.27395 | 0.000328 | 0 |
| chr12 | 82100001 | 82200000 | 425 | 571 | 82150000 | -0.23006 | 0.002047 | 0 |
| chr12 | 82450001 | 82550000 | 412 | 575 | 82500000 | -0.28495 | 0.000199 | 0 |
| chr12 | 82500001 | 82600000 | 374 | 557 | 82550000 | -0.37868 | 1.52E-06 | 0 |
| chr12 | 82550001 | 82650000 | 360 | 517 | 82600000 | -0.3262  | 2.67E-05 | 0 |
| chr12 | 83250001 | 83350000 | 376 | 490 | 83300000 | -0.18609 | 0.009939 | 0 |
| chr12 | 83300001 | 83400000 | 372 | 525 | 83350000 | -0.30105 | 9.32E-05 | 0 |
| chr12 | 83450001 | 83550000 | 391 | 539 | 83500000 | -0.26715 | 0.000442 | 0 |
| chr12 | 83600001 | 83700000 | 297 | 419 | 83650000 | -0.30052 | 9.56E-05 | 0 |
| chr12 | 84600001 | 84700000 | 366 | 477 | 84650000 | -0.18618 | 0.009908 | 0 |
| chr12 | 84750001 | 84850000 | 385 | 517 | 84800000 | -0.22934 | 0.002105 | 0 |
| chr12 | 86050001 | 86150000 | 429 | 560 | 86100000 | -0.18849 | 0.009179 | 0 |
| chr12 | 86250001 | 86350000 | 384 | 541 | 86300000 | -0.29856 | 0.000105 | 0 |
| chr12 | 86300001 | 86400000 | 407 | 547 | 86350000 | -0.23055 | 0.002009 | 0 |
| chr12 | 87050001 | 87150000 | 472 | 625 | 87100000 | -0.20911 | 0.004488 | 0 |
| chr12 | 87450001 | 87550000 | 409 | 533 | 87500000 | -0.18607 | 0.009944 | 0 |
| chr12 | 89200001 | 89300000 | 460 | 610 | 89250000 | -0.21121 | 0.004159 | 0 |
| chr12 | 89350001 | 89450000 | 510 | 692 | 89400000 | -0.24431 | 0.001161 | 0 |
| chr12 | 89400001 | 89500000 | 513 | 676 | 89450000 | -0.2021  | 0.005759 | 0 |
| chr12 | 90550001 | 90650000 | 464 | 614 | 90600000 | -0.20815 | 0.004645 | 0 |
| chr12 | 91000001 | 91100000 | 410 | 544 | 91050000 | -0.21202 | 0.004038 | 0 |
| chr12 | 91850001 | 91950000 | 522 | 513 | 91900000 | 0.221054 | 0.002646 | 0 |
| chr12 | 95550001 | 95650000 | 546 | 548 | 95600000 | 0.190688 | 0.008044 | 0 |
| chr12 | 96900001 | 97000000 | 485 | 638 | 96950000 | -0.19961 | 0.006284 | 0 |
| chr12 | 96950001 | 97050000 | 450 | 621 | 9.70E+07 | -0.26871 | 0.000413 | 0 |
| chr12 | 98000001 | 98100000 | 373 | 488 | 98050000 | -0.19174 | 0.008229 | 0 |
| chr12 | 98300001 | 98400000 | 474 | 621 | 98350000 | -0.19374 | 0.00769  | 0 |
| chr12 | 1.01E+08 | 1.01E+08 | 503 | 485 | 1.01E+08 | 0.248537 | 0.000864 | 0 |
| chr12 | 1.02E+08 | 1.02E+08 | 556 | 532 | 1.02E+08 | 0.259622 | 0.000534 | 0 |
| chr12 | 1.03E+08 | 1.03E+08 | 437 | 613 | 1.03E+08 | -0.29229 | 0.000141 | 0 |
| chr12 | 1.04E+08 | 1.04E+08 | 432 | 579 | 1.04E+08 | -0.22657 | 0.002343 | 0 |
| chr12 | 1.04E+08 | 1.04E+08 | 700 | 696 | 1.04E+08 | 0.204231 | 0.004979 | 0 |
| chr12 | 1.05E+08 | 1.05E+08 | 598 | 599 | 1.05E+08 | 0.193553 | 0.007284 | 0 |

|       |          |          |     |     |          |          |          |   |
|-------|----------|----------|-----|-----|----------|----------|----------|---|
| chr12 | 1.05E+08 | 1.05E+08 | 650 | 597 | 1.05E+08 | 0.318672 | 3.06E-05 | 0 |
| chr12 | 1.05E+08 | 1.05E+08 | 647 | 575 | 1.05E+08 | 0.366167 | 2.15E-06 | 0 |
| chr12 | 1.06E+08 | 1.06E+08 | 478 | 646 | 1.06E+08 | -0.23856 | 0.001464 | 0 |
| chr12 | 1.06E+08 | 1.06E+08 | 482 | 673 | 1.06E+08 | -0.28561 | 0.000193 | 0 |
| chr12 | 1.06E+08 | 1.06E+08 | 467 | 639 | 1.06E+08 | -0.25643 | 0.000702 | 0 |
| chr12 | 1.07E+08 | 1.07E+08 | 645 | 594 | 1.07E+08 | 0.314799 | 3.74E-05 | 0 |
| chr12 | 1.07E+08 | 1.07E+08 | 614 | 572 | 1.07E+08 | 0.298187 | 8.72E-05 | 0 |
| chr12 | 1.08E+08 | 1.08E+08 | 656 | 651 | 1.08E+08 | 0.207001 | 0.004499 | 0 |
| chr12 | 1.08E+08 | 1.08E+08 | 592 | 568 | 1.08E+08 | 0.255669 | 0.000635 | 0 |
| chr12 | 1.09E+08 | 1.09E+08 | 268 | 259 | 1.09E+08 | 0.245244 | 0.000994 | 0 |
| chr12 | 1.1E+08  | 1.1E+08  | 671 | 655 | 1.1E+08  | 0.230781 | 0.001803 | 0 |
| chr12 | 1.1E+08  | 1.11E+08 | 615 | 603 | 1.1E+08  | 0.224391 | 0.002323 | 0 |
| chr12 | 1.11E+08 | 1.11E+08 | 573 | 577 | 1.11E+08 | 0.185927 | 0.009464 | 0 |
| chr12 | 1.12E+08 | 1.12E+08 | 690 | 641 | 1.12E+08 | 0.302235 | 7.12E-05 | 0 |
| chr12 | 1.12E+08 | 1.12E+08 | 726 | 694 | 1.12E+08 | 0.260997 | 0.000502 | 0 |
| chr12 | 1.13E+08 | 1.13E+08 | 663 | 601 | 1.13E+08 | 0.337607 | 1.10E-05 | 0 |
| chr12 | 1.13E+08 | 1.13E+08 | 576 | 554 | 1.13E+08 | 0.252146 | 0.00074  | 0 |
| chr12 | 1.14E+08 | 1.14E+08 | 739 | 719 | 1.14E+08 | 0.235546 | 0.001486 | 0 |
| chr12 | 1.14E+08 | 1.14E+08 | 751 | 696 | 1.14E+08 | 0.305689 | 5.98E-05 | 0 |
| chr12 | 1.14E+08 | 1.14E+08 | 728 | 682 | 1.14E+08 | 0.29013  | 0.00013  | 0 |
| chr12 | 1.14E+08 | 1.14E+08 | 716 | 702 | 1.14E+08 | 0.224452 | 0.002318 | 0 |
| chr12 | 1.15E+08 | 1.15E+08 | 550 | 545 | 1.15E+08 | 0.209138 | 0.004158 | 0 |
| chr12 | 1.18E+08 | 1.19E+08 | 592 | 590 | 1.19E+08 | 0.200845 | 0.005627 | 0 |
| chr12 | 1.19E+08 | 1.19E+08 | 541 | 542 | 1.19E+08 | 0.193299 | 0.007348 | 0 |
| chr12 | 1.2E+08  | 1.2E+08  | 534 | 700 | 1.2E+08  | -0.19455 | 0.007481 | 0 |
| chr12 | 1.2E+08  | 1.21E+08 | 716 | 648 | 1.21E+08 | 0.339929 | 9.69E-06 | 0 |
| chr12 | 1.21E+08 | 1.21E+08 | 814 | 757 | 1.21E+08 | 0.300699 | 7.69E-05 | 0 |
| chr12 | 1.21E+08 | 1.21E+08 | 697 | 660 | 1.21E+08 | 0.274656 | 0.00027  | 0 |
| chr12 | 1.21E+08 | 1.21E+08 | 663 | 605 | 1.21E+08 | 0.328037 | 1.86E-05 | 0 |
| chr12 | 1.21E+08 | 1.21E+08 | 586 | 544 | 1.21E+08 | 0.303257 | 6.76E-05 | 0 |
| chr12 | 1.21E+08 | 1.21E+08 | 731 | 712 | 1.21E+08 | 0.233957 | 0.001586 | 0 |
| chr12 | 1.21E+08 | 1.21E+08 | 754 | 685 | 1.21E+08 | 0.334424 | 1.31E-05 | 0 |
| chr12 | 1.21E+08 | 1.21E+08 | 696 | 692 | 1.21E+08 | 0.204278 | 0.00497  | 0 |
| chr12 | 1.21E+08 | 1.21E+08 | 556 | 558 | 1.21E+08 | 0.190783 | 0.008018 | 0 |
| chr12 | 1.21E+08 | 1.21E+08 | 607 | 601 | 1.21E+08 | 0.210295 | 0.003983 | 0 |
| chr12 | 1.22E+08 | 1.22E+08 | 659 | 664 | 1.22E+08 | 0.185058 | 0.009745 | 0 |
| chr12 | 1.22E+08 | 1.23E+08 | 568 | 545 | 1.23E+08 | 0.255598 | 0.000637 | 0 |
| chr12 | 1.23E+08 | 1.23E+08 | 675 | 674 | 1.23E+08 | 0.198102 | 0.006206 | 0 |
| chr12 | 1.23E+08 | 1.23E+08 | 672 | 650 | 1.23E+08 | 0.243985 | 0.001048 | 0 |
| chr12 | 1.23E+08 | 1.23E+08 | 624 | 603 | 1.23E+08 | 0.245351 | 0.000989 | 0 |
| chr12 | 1.23E+08 | 1.23E+08 | 585 | 579 | 1.23E+08 | 0.210836 | 0.003903 | 0 |
| chr12 | 1.23E+08 | 1.23E+08 | 565 | 555 | 1.23E+08 | 0.221726 | 0.002578 | 0 |
| chr12 | 1.23E+08 | 1.23E+08 | 623 | 612 | 1.23E+08 | 0.221664 | 0.002584 | 0 |
| chr12 | 1.23E+08 | 1.23E+08 | 614 | 593 | 1.23E+08 | 0.24617  | 0.000955 | 0 |
| chr12 | 1.23E+08 | 1.23E+08 | 697 | 673 | 1.23E+08 | 0.246515 | 0.000942 | 0 |
| chr12 | 1.23E+08 | 1.23E+08 | 766 | 731 | 1.23E+08 | 0.263436 | 0.00045  | 0 |
| chr12 | 1.23E+08 | 1.23E+08 | 656 | 660 | 1.23E+08 | 0.187193 | 0.009066 | 0 |

|       |          |          |      |      |          |          |          |   |
|-------|----------|----------|------|------|----------|----------|----------|---|
| chr12 | 1.24E+08 | 1.24E+08 | 586  | 577  | 1.24E+08 | 0.218292 | 0.002943 | 0 |
| chr12 | 1.24E+08 | 1.24E+08 | 580  | 579  | 1.24E+08 | 0.198453 | 0.006129 | 0 |
| chr12 | 1.24E+08 | 1.24E+08 | 573  | 570  | 1.24E+08 | 0.203536 | 0.005106 | 0 |
| chr12 | 1.24E+08 | 1.24E+08 | 535  | 511  | 1.24E+08 | 0.262179 | 0.000476 | 0 |
| chr12 | 1.25E+08 | 1.25E+08 | 892  | 884  | 1.25E+08 | 0.20896  | 0.004185 | 0 |
| chr12 | 1.25E+08 | 1.25E+08 | 852  | 858  | 1.25E+08 | 0.185839 | 0.009492 | 0 |
| chr12 | 1.25E+08 | 1.25E+08 | 836  | 817  | 1.25E+08 | 0.22913  | 0.001926 | 0 |
| chr12 | 1.25E+08 | 1.25E+08 | 812  | 790  | 1.25E+08 | 0.23559  | 0.001484 | 0 |
| chr12 | 1.25E+08 | 1.25E+08 | 683  | 669  | 1.25E+08 | 0.225842 | 0.002194 | 0 |
| chr12 | 1.25E+08 | 1.25E+08 | 617  | 615  | 1.25E+08 | 0.200647 | 0.005667 | 0 |
| chr12 | 1.26E+08 | 1.26E+08 | 497  | 668  | 1.26E+08 | -0.23064 | 0.002002 | 0 |
| chr12 | 1.26E+08 | 1.27E+08 | 440  | 600  | 1.26E+08 | -0.2515  | 0.000863 | 0 |
| chr12 | 1.27E+08 | 1.27E+08 | 462  | 610  | 1.27E+08 | -0.20495 | 0.005207 | 0 |
| chr12 | 1.27E+08 | 1.27E+08 | 469  | 617  | 1.27E+08 | -0.19972 | 0.00626  | 0 |
| chr12 | 1.27E+08 | 1.27E+08 | 480  | 638  | 1.27E+08 | -0.21456 | 0.00368  | 0 |
| chr12 | 1.27E+08 | 1.27E+08 | 466  | 617  | 1.27E+08 | -0.20898 | 0.004509 | 0 |
| chr12 | 1.28E+08 | 1.28E+08 | 378  | 493  | 1.28E+08 | -0.18724 | 0.009568 | 0 |
| chr12 | 1.28E+08 | 1.29E+08 | 412  | 547  | 1.28E+08 | -0.21293 | 0.003906 | 0 |
| chr12 | 1.3E+08  | 1.3E+08  | 484  | 647  | 1.3E+08  | -0.2228  | 0.002705 | 0 |
| chr12 | 1.3E+08  | 1.31E+08 | 698  | 688  | 1.31E+08 | 0.216782 | 0.003119 | 0 |
| chr12 | 1.32E+08 | 1.32E+08 | 602  | 606  | 1.32E+08 | 0.186409 | 0.009311 | 0 |
| chr12 | 1.32E+08 | 1.32E+08 | 732  | 678  | 1.32E+08 | 0.306521 | 5.73E-05 | 0 |
| chr12 | 1.32E+08 | 1.32E+08 | 751  | 664  | 1.32E+08 | 0.373593 | 1.38E-06 | 0 |
| chr12 | 1.33E+08 | 1.33E+08 | 744  | 715  | 1.33E+08 | 0.253322 | 0.000703 | 0 |
| chr12 | 1.33E+08 | 1.33E+08 | 842  | 808  | 1.33E+08 | 0.255428 | 0.000642 | 0 |
| chr12 | 1.33E+08 | 1.33E+08 | 41   | 63   | 1.33E+08 | -0.42376 | 9.93E-08 | 0 |
| chr12 | 1.33E+08 | 1.33E+08 | 834  | 794  | 1.33E+08 | 0.266871 | 0.000386 | 0 |
| chr12 | 1.33E+08 | 1.33E+08 | 811  | 746  | 1.33E+08 | 0.316489 | 3.43E-05 | 0 |
| chr12 | 1.33E+08 | 1.33E+08 | 860  | 843  | 1.33E+08 | 0.224767 | 0.002289 | 0 |
| chr12 | 1.33E+08 | 1.33E+08 | 681  | 675  | 1.33E+08 | 0.20873  | 0.004221 | 0 |
| chr12 | 1.33E+08 | 1.33E+08 | 659  | 625  | 1.33E+08 | 0.272385 | 0.0003   | 0 |
| chr12 | 1        | 100000   | 114  | 117  | 50000    | 0.158488 | 0.022685 | 0 |
| chr12 | 500001   | 600000   | 932  | 948  | 550000   | 0.171406 | 0.01523  | 0 |
| chr12 | 850001   | 950000   | 900  | 934  | 9.00E+05 | 0.142465 | 0.036003 | 0 |
| chr12 | 900001   | 1000000  | 948  | 975  | 950000   | 0.155448 | 0.024831 | 0 |
| chr12 | 1900001  | 2000000  | 1124 | 1152 | 1950000  | 0.160464 | 0.021376 | 0 |
| chr12 | 2450001  | 2550000  | 1126 | 1169 | 2500000  | 0.141895 | 0.036576 | 0 |
| chr12 | 2500001  | 2600000  | 1115 | 1133 | 2550000  | 0.172859 | 0.014542 | 0 |
| chr12 | 2600001  | 2700000  | 1095 | 1121 | 2650000  | 0.162108 | 0.020337 | 0 |
| chr12 | 2650001  | 2750000  | 1157 | 1172 | 2700000  | 0.177379 | 0.012568 | 0 |
| chr12 | 2900001  | 3000000  | 990  | 1027 | 2950000  | 0.143027 | 0.035446 | 0 |
| chr12 | 2950001  | 3050000  | 865  | 896  | 3.00E+06 | 0.145164 | 0.033391 | 0 |
| chr12 | 3050001  | 3150000  | 1022 | 1055 | 3100000  | 0.150115 | 0.029007 | 0 |
| chr12 | 4600001  | 4700000  | 815  | 830  | 4650000  | 0.169652 | 0.016099 | 0 |
| chr12 | 4950001  | 5050000  | 943  | 981  | 5.00E+06 | 0.138968 | 0.039635 | 0 |
| chr12 | 5050001  | 5150000  | 919  | 958  | 5100000  | 0.136002 | 0.042943 | 0 |
| chr12 | 5200001  | 5300000  | 851  | 873  | 5250000  | 0.159141 | 0.022246 | 0 |

|       |          |          |      |      |          |          |          |   |
|-------|----------|----------|------|------|----------|----------|----------|---|
| chr12 | 5450001  | 5550000  | 935  | 948  | 5500000  | 0.176042 | 0.013126 | 0 |
| chr12 | 6600001  | 6700000  | 1017 | 1033 | 6650000  | 0.173442 | 0.014273 | 0 |
| chr12 | 6700001  | 6800000  | 1081 | 1110 | 6750000  | 0.15777  | 0.023178 | 0 |
| chr12 | 6850001  | 6950000  | 1085 | 1132 | 6900000  | 0.134784 | 0.044365 | 0 |
| chr12 | 6900001  | 7000000  | 1049 | 1095 | 6950000  | 0.134047 | 0.045244 | 0 |
| chr12 | 7050001  | 7150000  | 1085 | 1103 | 7100000  | 0.172225 | 0.014838 | 0 |
| chr12 | 7150001  | 7250000  | 559  | 574  | 7200000  | 0.157761 | 0.023184 | 0 |
| chr12 | 7250001  | 7350000  | 1099 | 1145 | 7300000  | 0.136807 | 0.042024 | 0 |
| chr12 | 7700001  | 7800000  | 739  | 752  | 7750000  | 0.170805 | 0.015523 | 0 |
| chr12 | 8000001  | 8100000  | 656  | 685  | 8050000  | 0.133555 | 0.045839 | 0 |
| chr12 | 8450001  | 8550000  | 87   | 91   | 8500000  | 0.131112 | 0.048884 | 0 |
| chr12 | 9150001  | 9250000  | 882  | 923  | 9200000  | 0.130411 | 0.049786 | 0 |
| chr12 | 9250001  | 9350000  | 909  | 932  | 9300000  | 0.159913 | 0.021734 | 0 |
| chr12 | 9550001  | 9650000  | 164  | 166  | 9600000  | 0.178476 | 0.012126 | 0 |
| chr12 | 9650001  | 9750000  | 209  | 263  | 9700000  | -0.1356  | 0.044421 | 0 |
| chr12 | 9900001  | 10000000 | 841  | 880  | 9950000  | 0.130565 | 0.049587 | 0 |
| chr12 | 10250001 | 10350000 | 809  | 842  | 10300000 | 0.138283 | 0.04038  | 0 |
| chr12 | 11200001 | 11300000 | 471  | 477  | 11250000 | 0.177701 | 0.012437 | 0 |
| chr12 | 11450001 | 11550000 | 367  | 463  | 11500000 | -0.13927 | 0.040293 | 0 |
| chr12 | 11550001 | 11650000 | 657  | 687  | 11600000 | 0.131546 | 0.048331 | 0 |
| chr12 | 11850001 | 11950000 | 849  | 1096 | 11900000 | -0.17245 | 0.015398 | 0 |
| chr12 | 12950001 | 13050000 | 914  | 942  | 1.30E+07 | 0.15243  | 0.027127 | 0 |
| chr12 | 13300001 | 13400000 | 1138 | 1149 | 13350000 | 0.182085 | 0.010764 | 0 |
| chr12 | 13350001 | 13450000 | 1106 | 1147 | 13400000 | 0.143449 | 0.035033 | 0 |
| chr12 | 13750001 | 13850000 | 806  | 1022 | 13800000 | -0.14658 | 0.033007 | 0 |
| chr12 | 14100001 | 14200000 | 609  | 787  | 14150000 | -0.17396 | 0.014688 | 0 |
| chr12 | 14150001 | 14250000 | 547  | 699  | 14200000 | -0.15779 | 0.02398  | 0 |
| chr12 | 14500001 | 14600000 | 743  | 770  | 14550000 | 0.144467 | 0.034051 | 0 |
| chr12 | 14600001 | 14700000 | 664  | 847  | 14650000 | -0.15522 | 0.025843 | 0 |
| chr12 | 15350001 | 15450000 | 708  | 894  | 15400000 | -0.14056 | 0.038916 | 0 |
| chr12 | 15400001 | 15500000 | 705  | 911  | 15450000 | -0.17386 | 0.014731 | 0 |
| chr12 | 15450001 | 15550000 | 715  | 926  | 15500000 | -0.17711 | 0.013297 | 0 |
| chr12 | 15550001 | 15650000 | 659  | 830  | 15600000 | -0.13687 | 0.042952 | 0 |
| chr12 | 15950001 | 16050000 | 781  | 806  | 1.60E+07 | 0.150506 | 0.028682 | 0 |
| chr12 | 16000001 | 16100000 | 806  | 837  | 16050000 | 0.141515 | 0.036962 | 0 |
| chr12 | 16100001 | 16200000 | 720  | 926  | 16150000 | -0.16705 | 0.018186 | 0 |
| chr12 | 16150001 | 16250000 | 694  | 900  | 16200000 | -0.17903 | 0.012506 | 0 |
| chr12 | 17050001 | 17150000 | 636  | 806  | 17100000 | -0.14579 | 0.033737 | 0 |
| chr12 | 17100001 | 17200000 | 567  | 732  | 17150000 | -0.17253 | 0.015358 | 0 |
| chr12 | 17150001 | 17250000 | 573  | 731  | 17200000 | -0.15537 | 0.025725 | 0 |
| chr12 | 17350001 | 17450000 | 601  | 757  | 17400000 | -0.13697 | 0.042844 | 0 |
| chr12 | 18400001 | 18500000 | 671  | 843  | 18450000 | -0.13326 | 0.047225 | 0 |
| chr12 | 18450001 | 18550000 | 663  | 850  | 18500000 | -0.16249 | 0.020869 | 0 |
| chr12 | 18700001 | 18800000 | 603  | 779  | 18750000 | -0.1735  | 0.014899 | 0 |
| chr12 | 20900001 | 21000000 | 574  | 741  | 20950000 | -0.17246 | 0.015393 | 0 |
| chr12 | 21200001 | 21300000 | 591  | 758  | 21250000 | -0.16308 | 0.020506 | 0 |
| chr12 | 22000001 | 22100000 | 639  | 804  | 22050000 | -0.13542 | 0.044632 | 0 |

|       |          |          |     |     |          |          |          |   |
|-------|----------|----------|-----|-----|----------|----------|----------|---|
| chr12 | 22550001 | 22650000 | 550 | 701 | 22600000 | -0.15402 | 0.026749 | 0 |
| chr12 | 23250001 | 23350000 | 576 | 723 | 23300000 | -0.13196 | 0.048835 | 0 |
| chr12 | 23300001 | 23400000 | 620 | 786 | 23350000 | -0.1463  | 0.033266 | 0 |
| chr12 | 23350001 | 23450000 | 670 | 870 | 23400000 | -0.18089 | 0.011777 | 0 |
| chr12 | 24200001 | 24300000 | 729 | 922 | 24250000 | -0.14288 | 0.03654  | 0 |
| chr12 | 24450001 | 24550000 | 691 | 880 | 24500000 | -0.15285 | 0.027658 | 0 |
| chr12 | 24700001 | 24800000 | 723 | 931 | 24750000 | -0.16882 | 0.017227 | 0 |
| chr12 | 24750001 | 24850000 | 657 | 848 | 24800000 | -0.17221 | 0.015514 | 0 |
| chr12 | 25350001 | 25450000 | 910 | 950 | 25400000 | 0.133902 | 0.045419 | 0 |
| chr12 | 25550001 | 25650000 | 699 | 901 | 25600000 | -0.17027 | 0.016475 | 0 |
| chr12 | 26950001 | 27050000 | 914 | 930 | 2.70E+07 | 0.170926 | 0.015464 | 0 |
| chr12 | 27150001 | 27250000 | 788 | 807 | 27200000 | 0.16159  | 0.020659 | 0 |
| chr12 | 28150001 | 28250000 | 718 | 925 | 28200000 | -0.16951 | 0.016868 | 0 |
| chr12 | 28750001 | 28850000 | 593 | 754 | 28800000 | -0.15057 | 0.029515 | 0 |
| chr12 | 29250001 | 29350000 | 591 | 752 | 29300000 | -0.15161 | 0.028656 | 0 |
| chr12 | 30050001 | 30150000 | 618 | 778 | 30100000 | -0.1362  | 0.04372  | 0 |
| chr12 | 30150001 | 30250000 | 670 | 842 | 30200000 | -0.1337  | 0.046688 | 0 |
| chr12 | 31150001 | 31250000 | 487 | 498 | 31200000 | 0.163739 | 0.019348 | 0 |
| chr12 | 31650001 | 31750000 | 835 | 847 | 31700000 | 0.175377 | 0.013411 | 0 |
| chr12 | 31800001 | 31900000 | 879 | 918 | 31850000 | 0.133332 | 0.04611  | 0 |
| chr12 | 32800001 | 32900000 | 781 | 795 | 32850000 | 0.170331 | 0.015758 | 0 |
| chr12 | 32850001 | 32950000 | 779 | 812 | 32900000 | 0.136107 | 0.042823 | 0 |
| chr12 | 33400001 | 33500000 | 622 | 786 | 33450000 | -0.14165 | 0.037786 | 0 |
| chr12 | 33550001 | 33650000 | 633 | 804 | 33600000 | -0.14903 | 0.030827 | 0 |
| chr12 | 33600001 | 33700000 | 563 | 721 | 33650000 | -0.1609  | 0.02188  | 0 |
| chr12 | 33700001 | 33800000 | 650 | 825 | 33750000 | -0.14799 | 0.031734 | 0 |
| chr12 | 33750001 | 33850000 | 623 | 801 | 33800000 | -0.16661 | 0.018434 | 0 |
| chr12 | 33850001 | 33950000 | 567 | 724 | 33900000 | -0.15668 | 0.02477  | 0 |
| chr12 | 34100001 | 34200000 | 333 | 429 | 34150000 | -0.16949 | 0.016876 | 0 |
| chr12 | 34400001 | 34500000 | 865 | 879 | 34450000 | 0.1728   | 0.014569 | 0 |
| chr12 | 34500001 | 34600000 | 892 | 925 | 34550000 | 0.143553 | 0.034931 | 0 |
| chr12 | 34600001 | 34700000 | 476 | 611 | 34650000 | -0.16425 | 0.019798 | 0 |
| chr12 | 38450001 | 38550000 | 528 | 548 | 38500000 | 0.142325 | 0.036144 | 0 |
| chr12 | 39500001 | 39600000 | 625 | 797 | 39550000 | -0.15476 | 0.026185 | 0 |
| chr12 | 40400001 | 40500000 | 876 | 907 | 40450000 | 0.145791 | 0.032807 | 0 |
| chr12 | 40550001 | 40650000 | 690 | 867 | 40600000 | -0.13347 | 0.046961 | 0 |
| chr12 | 40600001 | 40700000 | 710 | 894 | 40650000 | -0.13649 | 0.043383 | 0 |
| chr12 | 40700001 | 40800000 | 654 | 827 | 40750000 | -0.14263 | 0.036791 | 0 |
| chr12 | 41100001 | 41200000 | 621 | 806 | 41150000 | -0.18022 | 0.012034 | 0 |
| chr12 | 41450001 | 41550000 | 548 | 713 | 41500000 | -0.18376 | 0.010728 | 0 |
| chr12 | 41850001 | 41950000 | 675 | 879 | 41900000 | -0.18501 | 0.010297 | 0 |
| chr12 | 41900001 | 42000000 | 681 | 875 | 41950000 | -0.16567 | 0.018968 | 0 |
| chr12 | 41950001 | 42050000 | 617 | 794 | 4.20E+07 | -0.16791 | 0.017718 | 0 |
| chr12 | 42500001 | 42600000 | 830 | 849 | 42550000 | 0.16331  | 0.019604 | 0 |
| chr12 | 43000001 | 43100000 | 688 | 887 | 43050000 | -0.17056 | 0.016327 | 0 |
| chr12 | 43050001 | 43150000 | 667 | 859 | 43100000 | -0.16901 | 0.017129 | 0 |
| chr12 | 43100001 | 43200000 | 666 | 861 | 43150000 | -0.17453 | 0.014427 | 0 |

|       |          |          |      |      |          |          |          |   |
|-------|----------|----------|------|------|----------|----------|----------|---|
| chr12 | 43200001 | 43300000 | 643  | 827  | 43250000 | -0.16711 | 0.018156 | 0 |
| chr12 | 43250001 | 43350000 | 676  | 848  | 43300000 | -0.13108 | 0.049964 | 0 |
| chr12 | 43700001 | 43800000 | 740  | 936  | 43750000 | -0.14302 | 0.036405 | 0 |
| chr12 | 44250001 | 44350000 | 676  | 849  | 44300000 | -0.13278 | 0.047816 | 0 |
| chr12 | 44600001 | 44700000 | 616  | 793  | 44650000 | -0.16843 | 0.017437 | 0 |
| chr12 | 44750001 | 44850000 | 697  | 884  | 44800000 | -0.14692 | 0.032692 | 0 |
| chr12 | 44800001 | 44900000 | 655  | 823  | 44850000 | -0.13343 | 0.047007 | 0 |
| chr12 | 44850001 | 44950000 | 648  | 842  | 44900000 | -0.18186 | 0.011412 | 0 |
| chr12 | 44950001 | 45050000 | 603  | 769  | 4.50E+07 | -0.15486 | 0.026108 | 0 |
| chr12 | 45050001 | 45150000 | 635  | 803  | 45100000 | -0.14268 | 0.036744 | 0 |
| chr12 | 45350001 | 45450000 | 710  | 904  | 45400000 | -0.15254 | 0.027907 | 0 |
| chr12 | 45850001 | 45950000 | 720  | 929  | 45900000 | -0.17172 | 0.015752 | 0 |
| chr12 | 46700001 | 46800000 | 898  | 923  | 46750000 | 0.156348 | 0.024179 | 0 |
| chr12 | 46750001 | 46850000 | 999  | 1024 | 46800000 | 0.160304 | 0.02148  | 0 |
| chr12 | 47400001 | 47500000 | 760  | 961  | 47450000 | -0.14257 | 0.036851 | 0 |
| chr12 | 48050001 | 48150000 | 1144 | 1184 | 48100000 | 0.146381 | 0.032266 | 0 |
| chr12 | 48200001 | 48300000 | 1177 | 1201 | 48250000 | 0.166841 | 0.01758  | 0 |
| chr12 | 48250001 | 48350000 | 1168 | 1211 | 48300000 | 0.143804 | 0.034687 | 0 |
| chr12 | 48700001 | 48800000 | 786  | 807  | 48750000 | 0.157924 | 0.023071 | 0 |
| chr12 | 49100001 | 49200000 | 918  | 931  | 49150000 | 0.175676 | 0.013282 | 0 |
| chr12 | 49150001 | 49250000 | 999  | 1029 | 49200000 | 0.153277 | 0.026466 | 0 |
| chr12 | 49650001 | 49750000 | 932  | 960  | 49700000 | 0.153259 | 0.02648  | 0 |
| chr12 | 49700001 | 49800000 | 952  | 975  | 49750000 | 0.161522 | 0.020702 | 0 |
| chr12 | 49850001 | 49950000 | 958  | 968  | 49900000 | 0.180982 | 0.011166 | 0 |
| chr12 | 49900001 | 50000000 | 1091 | 1110 | 49950000 | 0.171054 | 0.015401 | 0 |
| chr12 | 50100001 | 50200000 | 930  | 941  | 50150000 | 0.178999 | 0.011919 | 0 |
| chr12 | 50250001 | 50350000 | 1117 | 1165 | 50300000 | 0.135262 | 0.043803 | 0 |
| chr12 | 50400001 | 50500000 | 1114 | 1127 | 50450000 | 0.179225 | 0.011831 | 0 |
| chr12 | 50450001 | 50550000 | 1094 | 1140 | 50500000 | 0.136542 | 0.042325 | 0 |
| chr12 | 50500001 | 50600000 | 904  | 941  | 50550000 | 0.138091 | 0.040591 | 0 |
| chr12 | 50550001 | 50650000 | 892  | 911  | 50600000 | 0.165556 | 0.018295 | 0 |
| chr12 | 50600001 | 50700000 | 879  | 897  | 50650000 | 0.166718 | 0.017647 | 0 |
| chr12 | 51600001 | 51700000 | 827  | 844  | 51650000 | 0.166607 | 0.017708 | 0 |
| chr12 | 52200001 | 52300000 | 1090 | 1134 | 52250000 | 0.138871 | 0.03974  | 0 |
| chr12 | 52450001 | 52550000 | 1030 | 1050 | 52500000 | 0.168218 | 0.01684  | 0 |
| chr12 | 52500001 | 52600000 | 1127 | 1166 | 52550000 | 0.146883 | 0.031811 | 0 |
| chr12 | 52550001 | 52650000 | 1236 | 1258 | 52600000 | 0.17051  | 0.015669 | 0 |
| chr12 | 53250001 | 53350000 | 976  | 998  | 53300000 | 0.163804 | 0.019309 | 0 |
| chr12 | 53300001 | 53400000 | 883  | 904  | 53350000 | 0.162054 | 0.02037  | 0 |
| chr12 | 53650001 | 53750000 | 1045 | 1058 | 53700000 | 0.178126 | 0.012265 | 0 |
| chr12 | 53850001 | 53950000 | 995  | 1031 | 53900000 | 0.144687 | 0.033841 | 0 |
| chr12 | 54400001 | 54500000 | 852  | 875  | 54450000 | 0.157533 | 0.023342 | 0 |
| chr12 | 54500001 | 54600000 | 974  | 1001 | 54550000 | 0.156515 | 0.024059 | 0 |
| chr12 | 54650001 | 54750000 | 960  | 990  | 54700000 | 0.151569 | 0.027814 | 0 |
| chr12 | 54850001 | 54950000 | 993  | 1034 | 54900000 | 0.137592 | 0.041143 | 0 |
| chr12 | 56150001 | 56250000 | 949  | 984  | 56200000 | 0.143713 | 0.034776 | 0 |
| chr12 | 56350001 | 56450000 | 881  | 895  | 56400000 | 0.173217 | 0.014376 | 0 |

|       |          |          |     |     |          |          |          |   |
|-------|----------|----------|-----|-----|----------|----------|----------|---|
| chr12 | 56500001 | 56600000 | 697 | 728 | 56550000 | 0.133183 | 0.046292 | 0 |
| chr12 | 56700001 | 56800000 | 606 | 612 | 56750000 | 0.181749 | 0.010885 | 0 |
| chr12 | 56750001 | 56850000 | 595 | 610 | 56800000 | 0.160043 | 0.021649 | 0 |
| chr12 | 56800001 | 56900000 | 603 | 631 | 56850000 | 0.130481 | 0.049696 | 0 |
| chr12 | 56900001 | 57000000 | 831 | 849 | 56950000 | 0.165047 | 0.018585 | 0 |
| chr12 | 57450001 | 57550000 | 760 | 777 | 57500000 | 0.164048 | 0.019165 | 0 |
| chr12 | 57650001 | 57750000 | 599 | 611 | 57700000 | 0.167347 | 0.017305 | 0 |
| chr12 | 57700001 | 57800000 | 536 | 547 | 57750000 | 0.166655 | 0.017682 | 0 |
| chr12 | 57900001 | 58000000 | 693 | 700 | 57950000 | 0.181463 | 0.010989 | 0 |
| chr12 | 58100001 | 58200000 | 717 | 726 | 58150000 | 0.177967 | 0.012329 | 0 |
| chr12 | 58150001 | 58250000 | 712 | 730 | 58200000 | 0.159944 | 0.021715 | 0 |
| chr12 | 58200001 | 58300000 | 708 | 734 | 58250000 | 0.143932 | 0.034564 | 0 |
| chr12 | 58350001 | 58450000 | 496 | 519 | 58400000 | 0.130569 | 0.049582 | 0 |
| chr12 | 58500001 | 58600000 | 481 | 607 | 58550000 | -0.1397  | 0.039833 | 0 |
| chr12 | 60000001 | 60100000 | 568 | 582 | 60050000 | 0.160835 | 0.021138 | 0 |
| chr12 | 60050001 | 60150000 | 540 | 549 | 60100000 | 0.172116 | 0.01489  | 0 |
| chr12 | 60450001 | 60550000 | 476 | 615 | 60500000 | -0.17366 | 0.014825 | 0 |
| chr12 | 60500001 | 60600000 | 476 | 612 | 60550000 | -0.16661 | 0.018434 | 0 |
| chr12 | 60600001 | 60700000 | 460 | 594 | 60650000 | -0.17287 | 0.015199 | 0 |
| chr12 | 60650001 | 60750000 | 469 | 602 | 60700000 | -0.16421 | 0.019819 | 0 |
| chr12 | 60800001 | 60900000 | 437 | 563 | 60850000 | -0.16954 | 0.016852 | 0 |
| chr12 | 61550001 | 61650000 | 377 | 476 | 61600000 | -0.14043 | 0.039051 | 0 |
| chr12 | 61650001 | 61750000 | 352 | 456 | 61700000 | -0.1775  | 0.013133 | 0 |
| chr12 | 62000001 | 62100000 | 419 | 529 | 62050000 | -0.14035 | 0.039135 | 0 |
| chr12 | 62050001 | 62150000 | 439 | 551 | 62100000 | -0.13187 | 0.048956 | 0 |
| chr12 | 62100001 | 62200000 | 501 | 515 | 62150000 | 0.156201 | 0.024284 | 0 |
| chr12 | 62950001 | 63050000 | 640 | 663 | 6.30E+07 | 0.145026 | 0.033521 | 0 |
| chr12 | 64000001 | 64100000 | 61  | 78  | 64050000 | -0.1587  | 0.023347 | 0 |
| chr12 | 65000001 | 65100000 | 593 | 613 | 65050000 | 0.148108 | 0.030723 | 0 |
| chr12 | 65500001 | 65600000 | 543 | 687 | 65550000 | -0.14339 | 0.036035 | 0 |
| chr12 | 65850001 | 65950000 | 623 | 635 | 65900000 | 0.168439 | 0.016724 | 0 |
| chr12 | 66350001 | 66450000 | 475 | 607 | 66400000 | -0.15781 | 0.023968 | 0 |
| chr12 | 66850001 | 66950000 | 383 | 483 | 66900000 | -0.13872 | 0.040894 | 0 |
| chr12 | 67350001 | 67450000 | 462 | 585 | 67400000 | -0.14458 | 0.034882 | 0 |
| chr12 | 67550001 | 67650000 | 413 | 525 | 67600000 | -0.15021 | 0.029814 | 0 |
| chr12 | 68050001 | 68150000 | 468 | 609 | 68100000 | -0.18397 | 0.010655 | 0 |
| chr12 | 68300001 | 68400000 | 439 | 558 | 68350000 | -0.15008 | 0.029925 | 0 |
| chr12 | 68350001 | 68450000 | 473 | 603 | 68400000 | -0.15435 | 0.026493 | 0 |
| chr12 | 68550001 | 68650000 | 521 | 654 | 68600000 | -0.13204 | 0.048734 | 0 |
| chr12 | 68800001 | 68900000 | 560 | 577 | 68850000 | 0.152819 | 0.026822 | 0 |
| chr12 | 68850001 | 68950000 | 552 | 568 | 68900000 | 0.15474  | 0.025354 | 0 |
| chr12 | 69050001 | 69150000 | 589 | 606 | 69100000 | 0.154913 | 0.025226 | 0 |
| chr12 | 69200001 | 69300000 | 619 | 643 | 69250000 | 0.141084 | 0.037404 | 0 |
| chr12 | 69350001 | 69450000 | 597 | 622 | 69400000 | 0.136779 | 0.042055 | 0 |
| chr12 | 69800001 | 69900000 | 602 | 610 | 69850000 | 0.176917 | 0.012758 | 0 |
| chr12 | 69950001 | 70050000 | 628 | 645 | 7.00E+07 | 0.157428 | 0.023415 | 0 |
| chr12 | 70700001 | 70800000 | 559 | 571 | 70750000 | 0.165321 | 0.018428 | 0 |



|       |          |          |     |     |          |          |          |   |
|-------|----------|----------|-----|-----|----------|----------|----------|---|
| chr12 | 70850001 | 70950000 | 446 | 566 | 70900000 | -0.1478  | 0.031909 | 0 |
| chr12 | 71350001 | 71450000 | 514 | 650 | 71400000 | -0.14271 | 0.036716 | 0 |
| chr12 | 71450001 | 71550000 | 406 | 510 | 71500000 | -0.13305 | 0.047474 | 0 |
| chr12 | 71550001 | 71650000 | 453 | 578 | 71600000 | -0.1556  | 0.025561 | 0 |
| chr12 | 71600001 | 71700000 | 445 | 574 | 71650000 | -0.17128 | 0.015967 | 0 |
| chr12 | 71650001 | 71750000 | 436 | 559 | 71700000 | -0.16256 | 0.020827 | 0 |
| chr12 | 72000001 | 72100000 | 571 | 593 | 72050000 | 0.141422 | 0.037057 | 0 |
| chr12 | 72450001 | 72550000 | 436 | 562 | 72500000 | -0.17028 | 0.016471 | 0 |
| chr12 | 72600001 | 72700000 | 480 | 620 | 72650000 | -0.17327 | 0.015008 | 0 |
| chr12 | 73300001 | 73400000 | 360 | 469 | 73350000 | -0.18563 | 0.010091 | 0 |
| chr12 | 73600001 | 73700000 | 367 | 470 | 73650000 | -0.16092 | 0.021869 | 0 |
| chr12 | 73750001 | 73850000 | 339 | 439 | 73800000 | -0.17697 | 0.013353 | 0 |
| chr12 | 73950001 | 74050000 | 374 | 478 | 7.40E+07 | -0.15801 | 0.023826 | 0 |
| chr12 | 74100001 | 74200000 | 384 | 489 | 74150000 | -0.15277 | 0.027729 | 0 |
| chr12 | 74400001 | 74500000 | 343 | 439 | 74450000 | -0.16005 | 0.022438 | 0 |
| chr12 | 74450001 | 74550000 | 338 | 440 | 74500000 | -0.18452 | 0.010466 | 0 |
| chr12 | 74500001 | 74600000 | 379 | 491 | 74550000 | -0.17756 | 0.013105 | 0 |
| chr12 | 74700001 | 74800000 | 393 | 502 | 74750000 | -0.1572  | 0.0244   | 0 |
| chr12 | 75050001 | 75150000 | 394 | 500 | 75100000 | -0.14777 | 0.031932 | 0 |
| chr12 | 76300001 | 76400000 | 600 | 625 | 76350000 | 0.137069 | 0.041728 | 0 |
| chr12 | 77300001 | 77400000 | 463 | 592 | 77350000 | -0.15862 | 0.023402 | 0 |
| chr12 | 77900001 | 78000000 | 408 | 515 | 77950000 | -0.14004 | 0.039467 | 0 |
| chr12 | 78050001 | 78150000 | 410 | 528 | 78100000 | -0.16895 | 0.017159 | 0 |
| chr12 | 78200001 | 78300000 | 396 | 498 | 78250000 | -0.13468 | 0.0455   | 0 |
| chr12 | 78300001 | 78400000 | 429 | 540 | 78350000 | -0.13602 | 0.04393  | 0 |
| chr12 | 78600001 | 78700000 | 388 | 499 | 78650000 | -0.16702 | 0.018203 | 0 |
| chr12 | 78750001 | 78850000 | 446 | 576 | 78800000 | -0.17306 | 0.015106 | 0 |
| chr12 | 78950001 | 79050000 | 417 | 536 | 7.90E+07 | -0.16622 | 0.01865  | 0 |
| chr12 | 79300001 | 79400000 | 462 | 594 | 79350000 | -0.16661 | 0.018434 | 0 |
| chr12 | 79500001 | 79600000 | 431 | 554 | 79550000 | -0.16624 | 0.018643 | 0 |
| chr12 | 80000001 | 80100000 | 566 | 583 | 80050000 | 0.153269 | 0.026472 | 0 |
| chr12 | 80400001 | 80500000 | 449 | 571 | 80450000 | -0.15081 | 0.029313 | 0 |
| chr12 | 80750001 | 80850000 | 376 | 482 | 80800000 | -0.16234 | 0.020964 | 0 |
| chr12 | 80800001 | 80900000 | 355 | 453 | 80850000 | -0.15573 | 0.025462 | 0 |
| chr12 | 81800001 | 81900000 | 389 | 494 | 81850000 | -0.14878 | 0.031043 | 0 |
| chr12 | 81850001 | 81950000 | 387 | 494 | 81900000 | -0.15621 | 0.025106 | 0 |
| chr12 | 82000001 | 82100000 | 369 | 478 | 82050000 | -0.17743 | 0.013162 | 0 |
| chr12 | 82800001 | 82900000 | 419 | 530 | 82850000 | -0.14308 | 0.036347 | 0 |
| chr12 | 82900001 | 83000000 | 416 | 524 | 82950000 | -0.13702 | 0.042782 | 0 |
| chr12 | 82950001 | 83050000 | 388 | 502 | 8.30E+07 | -0.17567 | 0.013918 | 0 |
| chr12 | 83100001 | 83200000 | 404 | 507 | 83150000 | -0.13167 | 0.04921  | 0 |
| chr12 | 83350001 | 83450000 | 414 | 522 | 83400000 | -0.13846 | 0.041179 | 0 |
| chr12 | 83500001 | 83600000 | 422 | 541 | 83550000 | -0.16242 | 0.020911 | 0 |
| chr12 | 83550001 | 83650000 | 384 | 487 | 83600000 | -0.14685 | 0.032758 | 0 |
| chr12 | 83650001 | 83750000 | 357 | 459 | 83700000 | -0.16661 | 0.018434 | 0 |
| chr12 | 83700001 | 83800000 | 390 | 501 | 83750000 | -0.16537 | 0.019137 | 0 |
| chr12 | 83750001 | 83850000 | 375 | 471 | 83800000 | -0.13287 | 0.047698 | 0 |

|       |          |          |     |     |          |          |          |   |
|-------|----------|----------|-----|-----|----------|----------|----------|---|
| chr12 | 84200001 | 84300000 | 380 | 479 | 84250000 | -0.13806 | 0.041612 | 0 |
| chr12 | 84550001 | 84650000 | 389 | 492 | 84600000 | -0.14293 | 0.0365   | 0 |
| chr12 | 84800001 | 84900000 | 388 | 505 | 84850000 | -0.18426 | 0.010553 | 0 |
| chr12 | 85450001 | 85550000 | 430 | 560 | 85500000 | -0.18513 | 0.010258 | 0 |
| chr12 | 85500001 | 85600000 | 406 | 523 | 85550000 | -0.16937 | 0.01694  | 0 |
| chr12 | 85700001 | 85800000 | 434 | 552 | 85750000 | -0.15101 | 0.029149 | 0 |
| chr12 | 85750001 | 85850000 | 456 | 579 | 85800000 | -0.14857 | 0.031228 | 0 |
| chr12 | 85800001 | 85900000 | 443 | 557 | 85850000 | -0.13441 | 0.045829 | 0 |
| chr12 | 86350001 | 86450000 | 447 | 562 | 86400000 | -0.13433 | 0.045919 | 0 |
| chr12 | 86700001 | 86800000 | 407 | 518 | 86750000 | -0.15196 | 0.028373 | 0 |
| chr12 | 87200001 | 87300000 | 413 | 529 | 87250000 | -0.16116 | 0.02171  | 0 |
| chr12 | 88200001 | 88300000 | 528 | 681 | 88250000 | -0.17115 | 0.016031 | 0 |
| chr12 | 88250001 | 88350000 | 446 | 569 | 88300000 | -0.15542 | 0.025689 | 0 |
| chr12 | 88450001 | 88550000 | 555 | 574 | 88500000 | 0.1474   | 0.031348 | 0 |
| chr12 | 88500001 | 88600000 | 544 | 556 | 88550000 | 0.164485 | 0.018909 | 0 |
| chr12 | 89150001 | 89250000 | 455 | 587 | 89200000 | -0.17153 | 0.015844 | 0 |
| chr12 | 89250001 | 89350000 | 524 | 669 | 89300000 | -0.15648 | 0.024916 | 0 |
| chr12 | 89300001 | 89400000 | 518 | 671 | 89350000 | -0.1774  | 0.013174 | 0 |
| chr12 | 90650001 | 90750000 | 467 | 586 | 90700000 | -0.13152 | 0.049404 | 0 |
| chr12 | 90950001 | 91050000 | 416 | 539 | 9.10E+07 | -0.17774 | 0.013032 | 0 |
| chr12 | 91050001 | 91150000 | 417 | 532 | 91100000 | -0.15542 | 0.025694 | 0 |
| chr12 | 91100001 | 91200000 | 405 | 516 | 91150000 | -0.15349 | 0.027162 | 0 |
| chr12 | 92650001 | 92750000 | 472 | 610 | 92700000 | -0.17406 | 0.014641 | 0 |
| chr12 | 93650001 | 93750000 | 460 | 580 | 93700000 | -0.13846 | 0.041179 | 0 |
| chr12 | 93800001 | 93900000 | 593 | 609 | 93850000 | 0.157553 | 0.023328 | 0 |
| chr12 | 94300001 | 94400000 | 592 | 615 | 94350000 | 0.140974 | 0.037517 | 0 |
| chr12 | 95350001 | 95450000 | 567 | 583 | 95400000 | 0.155816 | 0.024563 | 0 |
| chr12 | 95900001 | 96000000 | 483 | 627 | 95950000 | -0.18048 | 0.011935 | 0 |
| chr12 | 95950001 | 96050000 | 551 | 568 | 9.60E+07 | 0.152124 | 0.027369 | 0 |
| chr12 | 96250001 | 96350000 | 565 | 580 | 96300000 | 0.158161 | 0.022908 | 0 |
| chr12 | 96400001 | 96500000 | 593 | 616 | 96450000 | 0.141065 | 0.037423 | 0 |
| chr12 | 96700001 | 96800000 | 583 | 600 | 96750000 | 0.154496 | 0.025537 | 0 |
| chr12 | 96800001 | 96900000 | 575 | 601 | 96850000 | 0.13216  | 0.047558 | 0 |
| chr12 | 97100001 | 97200000 | 549 | 565 | 97150000 | 0.154518 | 0.02552  | 0 |
| chr12 | 97150001 | 97250000 | 561 | 581 | 97200000 | 0.145426 | 0.033147 | 0 |
| chr12 | 98250001 | 98350000 | 441 | 555 | 98300000 | -0.13575 | 0.044246 | 0 |
| chr12 | 98350001 | 98450000 | 493 | 633 | 98400000 | -0.16465 | 0.019556 | 0 |
| chr12 | 98450001 | 98550000 | 507 | 640 | 98500000 | -0.14012 | 0.039379 | 0 |
| chr12 | 98500001 | 98600000 | 486 | 613 | 98550000 | -0.13897 | 0.040619 | 0 |
| chr12 | 99550001 | 99650000 | 428 | 540 | 99600000 | -0.13939 | 0.040167 | 0 |
| chr12 | 99700001 | 99800000 | 443 | 567 | 99750000 | -0.16008 | 0.022419 | 0 |
| chr12 | 1E+08    | 1E+08    | 513 | 530 | 1E+08    | 0.14893  | 0.030011 | 0 |
| chr12 | 1.01E+08 | 1.01E+08 | 519 | 527 | 1.01E+08 | 0.173895 | 0.014067 | 0 |
| chr12 | 1.01E+08 | 1.01E+08 | 520 | 664 | 1.01E+08 | -0.15671 | 0.024748 | 0 |
| chr12 | 1.02E+08 | 1.02E+08 | 540 | 559 | 1.02E+08 | 0.146074 | 0.032547 | 0 |
| chr12 | 1.02E+08 | 1.02E+08 | 497 | 506 | 1.02E+08 | 0.170072 | 0.015887 | 0 |
| chr12 | 1.02E+08 | 1.02E+08 | 419 | 544 | 1.02E+08 | -0.18069 | 0.011853 | 0 |

|       |          |          |     |     |          |          |          |   |
|-------|----------|----------|-----|-----|----------|----------|----------|---|
| chr12 | 1.02E+08 | 1.02E+08 | 583 | 596 | 1.02E+08 | 0.164147 | 0.019107 | 0 |
| chr12 | 1.03E+08 | 1.03E+08 | 476 | 610 | 1.03E+08 | -0.16188 | 0.021249 | 0 |
| chr12 | 1.03E+08 | 1.03E+08 | 426 | 545 | 1.03E+08 | -0.15944 | 0.022846 | 0 |
| chr12 | 1.03E+08 | 1.03E+08 | 488 | 620 | 1.03E+08 | -0.14942 | 0.030485 | 0 |
| chr12 | 1.04E+08 | 1.04E+08 | 658 | 665 | 1.04E+08 | 0.180696 | 0.011271 | 0 |
| chr12 | 1.05E+08 | 1.05E+08 | 628 | 656 | 1.05E+08 | 0.133032 | 0.046478 | 0 |
| chr12 | 1.06E+08 | 1.06E+08 | 527 | 669 | 1.06E+08 | -0.14824 | 0.031514 | 0 |
| chr12 | 1.06E+08 | 1.07E+08 | 693 | 699 | 1.07E+08 | 0.183526 | 0.010259 | 0 |
| chr12 | 1.07E+08 | 1.07E+08 | 630 | 653 | 1.07E+08 | 0.144232 | 0.034275 | 0 |
| chr12 | 1.07E+08 | 1.07E+08 | 623 | 651 | 1.07E+08 | 0.132538 | 0.047088 | 0 |
| chr12 | 1.07E+08 | 1.07E+08 | 626 | 654 | 1.07E+08 | 0.132835 | 0.04672  | 0 |
| chr12 | 1.08E+08 | 1.08E+08 | 536 | 681 | 1.08E+08 | -0.14946 | 0.030455 | 0 |
| chr12 | 1.08E+08 | 1.08E+08 | 535 | 555 | 1.08E+08 | 0.143014 | 0.035459 | 0 |
| chr12 | 1.09E+08 | 1.09E+08 | 602 | 756 | 1.09E+08 | -0.13266 | 0.047963 | 0 |
| chr12 | 1.09E+08 | 1.09E+08 | 706 | 719 | 1.09E+08 | 0.169639 | 0.016105 | 0 |
| chr12 | 1.09E+08 | 1.09E+08 | 725 | 744 | 1.09E+08 | 0.158641 | 0.022581 | 0 |
| chr12 | 1.1E+08  | 1.1E+08  | 750 | 775 | 1.1E+08  | 0.148657 | 0.030245 | 0 |
| chr12 | 1.1E+08  | 1.1E+08  | 712 | 730 | 1.1E+08  | 0.159944 | 0.021715 | 0 |
| chr12 | 1.1E+08  | 1.1E+08  | 690 | 699 | 1.1E+08  | 0.177267 | 0.012614 | 0 |
| chr12 | 1.11E+08 | 1.11E+08 | 601 | 628 | 1.11E+08 | 0.132563 | 0.047055 | 0 |
| chr12 | 1.11E+08 | 1.11E+08 | 612 | 636 | 1.11E+08 | 0.140468 | 0.038042 | 0 |
| chr12 | 1.11E+08 | 1.11E+08 | 637 | 644 | 1.11E+08 | 0.180196 | 0.011459 | 0 |
| chr12 | 1.11E+08 | 1.11E+08 | 589 | 596 | 1.11E+08 | 0.178918 | 0.011951 | 0 |
| chr12 | 1.11E+08 | 1.11E+08 | 521 | 541 | 1.11E+08 | 0.141618 | 0.036857 | 0 |
| chr12 | 1.11E+08 | 1.11E+08 | 586 | 591 | 1.11E+08 | 0.183706 | 0.010198 | 0 |
| chr12 | 1.11E+08 | 1.12E+08 | 695 | 708 | 1.11E+08 | 0.169227 | 0.016316 | 0 |
| chr12 | 1.12E+08 | 1.12E+08 | 612 | 623 | 1.12E+08 | 0.170263 | 0.015792 | 0 |
| chr12 | 1.12E+08 | 1.12E+08 | 610 | 629 | 1.12E+08 | 0.151712 | 0.027699 | 0 |
| chr12 | 1.12E+08 | 1.12E+08 | 540 | 550 | 1.12E+08 | 0.169491 | 0.016181 | 0 |
| chr12 | 1.12E+08 | 1.13E+08 | 606 | 630 | 1.12E+08 | 0.139929 | 0.038608 | 0 |
| chr12 | 1.13E+08 | 1.13E+08 | 593 | 599 | 1.13E+08 | 0.181439 | 0.010998 | 0 |
| chr12 | 1.13E+08 | 1.13E+08 | 636 | 648 | 1.13E+08 | 0.168996 | 0.016435 | 0 |
| chr12 | 1.13E+08 | 1.13E+08 | 576 | 598 | 1.13E+08 | 0.141886 | 0.036585 | 0 |
| chr12 | 1.13E+08 | 1.13E+08 | 657 | 687 | 1.13E+08 | 0.131546 | 0.048331 | 0 |
| chr12 | 1.15E+08 | 1.15E+08 | 635 | 646 | 1.15E+08 | 0.171185 | 0.015337 | 0 |
| chr12 | 1.15E+08 | 1.15E+08 | 575 | 586 | 1.15E+08 | 0.168624 | 0.016627 | 0 |
| chr12 | 1.16E+08 | 1.16E+08 | 603 | 629 | 1.16E+08 | 0.135061 | 0.044039 | 0 |
| chr12 | 1.16E+08 | 1.16E+08 | 587 | 607 | 1.16E+08 | 0.147627 | 0.031146 | 0 |
| chr12 | 1.17E+08 | 1.17E+08 | 600 | 625 | 1.17E+08 | 0.137069 | 0.041728 | 0 |
| chr12 | 1.17E+08 | 1.18E+08 | 649 | 674 | 1.18E+08 | 0.141433 | 0.037046 | 0 |
| chr12 | 1.18E+08 | 1.18E+08 | 654 | 678 | 1.18E+08 | 0.143968 | 0.034529 | 0 |
| chr12 | 1.18E+08 | 1.18E+08 | 560 | 577 | 1.18E+08 | 0.152819 | 0.026822 | 0 |
| chr12 | 1.19E+08 | 1.19E+08 | 543 | 561 | 1.19E+08 | 0.148914 | 0.030023 | 0 |
| chr12 | 1.19E+08 | 1.19E+08 | 513 | 527 | 1.19E+08 | 0.157119 | 0.023631 | 0 |
| chr12 | 1.2E+08  | 1.2E+08  | 542 | 549 | 1.20E+08 | 0.17745  | 0.012539 | 0 |
| chr12 | 1.2E+08  | 1.21E+08 | 595 | 613 | 1.2E+08  | 0.152966 | 0.026707 | 0 |
| chr12 | 1.21E+08 | 1.21E+08 | 694 | 701 | 1.21E+08 | 0.181484 | 0.010981 | 0 |

|       |          |          |     |     |          |          |          |   |
|-------|----------|----------|-----|-----|----------|----------|----------|---|
| chr12 | 1.21E+08 | 1.21E+08 | 628 | 650 | 1.21E+08 | 0.146288 | 0.032351 | 0 |
| chr12 | 1.21E+08 | 1.21E+08 | 590 | 606 | 1.21E+08 | 0.15736  | 0.023462 | 0 |
| chr12 | 1.21E+08 | 1.21E+08 | 562 | 571 | 1.21E+08 | 0.173042 | 0.014456 | 0 |
| chr12 | 1.21E+08 | 1.21E+08 | 591 | 609 | 1.21E+08 | 0.152679 | 0.026931 | 0 |
| chr12 | 1.21E+08 | 1.22E+08 | 599 | 612 | 1.22E+08 | 0.164987 | 0.018619 | 0 |
| chr12 | 1.22E+08 | 1.22E+08 | 608 | 634 | 1.22E+08 | 0.135552 | 0.043465 | 0 |
| chr12 | 1.22E+08 | 1.22E+08 | 638 | 644 | 1.22E+08 | 0.182459 | 0.010631 | 0 |
| chr12 | 1.22E+08 | 1.23E+08 | 626 | 638 | 1.22E+08 | 0.168569 | 0.016656 | 0 |
| chr12 | 1.23E+08 | 1.23E+08 | 569 | 577 | 1.23E+08 | 0.17582  | 0.01322  | 0 |
| chr12 | 1.23E+08 | 1.23E+08 | 568 | 588 | 1.23E+08 | 0.146038 | 0.03258  | 0 |
| chr12 | 1.23E+08 | 1.24E+08 | 754 | 766 | 1.23E+08 | 0.173183 | 0.014392 | 0 |
| chr12 | 1.23E+08 | 1.24E+08 | 804 | 827 | 1.24E+08 | 0.155271 | 0.024961 | 0 |
| chr12 | 1.24E+08 | 1.24E+08 | 789 | 820 | 1.24E+08 | 0.140364 | 0.038151 | 0 |
| chr12 | 1.24E+08 | 1.24E+08 | 593 | 605 | 1.24E+08 | 0.16706  | 0.01746  | 0 |
| chr12 | 1.24E+08 | 1.24E+08 | 605 | 631 | 1.24E+08 | 0.135258 | 0.043807 | 0 |
| chr12 | 1.25E+08 | 1.25E+08 | 823 | 844 | 1.25E+08 | 0.159612 | 0.021932 | 0 |
| chr12 | 1.25E+08 | 1.25E+08 | 843 | 879 | 1.25E+08 | 0.135633 | 0.043371 | 0 |
| chr12 | 1.25E+08 | 1.25E+08 | 750 | 780 | 1.25E+08 | 0.13938  | 0.039193 | 0 |
| chr12 | 1.26E+08 | 1.26E+08 | 767 | 793 | 1.26E+08 | 0.147869 | 0.030933 | 0 |
| chr12 | 1.26E+08 | 1.26E+08 | 530 | 669 | 1.26E+08 | -0.14005 | 0.039456 | 0 |
| chr12 | 1.26E+08 | 1.26E+08 | 491 | 500 | 1.26E+08 | 0.169758 | 0.016045 | 0 |
| chr12 | 1.26E+08 | 1.26E+08 | 448 | 576 | 1.26E+08 | -0.16661 | 0.018434 | 0 |
| chr12 | 1.27E+08 | 1.27E+08 | 450 | 565 | 1.27E+08 | -0.13236 | 0.048334 | 0 |
| chr12 | 1.27E+08 | 1.27E+08 | 446 | 567 | 1.27E+08 | -0.15034 | 0.029706 | 0 |
| chr12 | 1.27E+08 | 1.27E+08 | 452 | 572 | 1.27E+08 | -0.14373 | 0.035706 | 0 |
| chr12 | 1.28E+08 | 1.28E+08 | 407 | 512 | 1.28E+08 | -0.13515 | 0.044943 | 0 |
| chr12 | 1.28E+08 | 1.29E+08 | 438 | 567 | 1.29E+08 | -0.17645 | 0.013575 | 0 |
| chr12 | 1.29E+08 | 1.29E+08 | 408 | 531 | 1.29E+08 | -0.18418 | 0.010582 | 0 |
| chr12 | 1.29E+08 | 1.29E+08 | 515 | 538 | 1.29E+08 | 0.132929 | 0.046604 | 0 |
| chr12 | 1.29E+08 | 1.29E+08 | 537 | 555 | 1.29E+08 | 0.148397 | 0.03047  | 0 |
| chr12 | 1.29E+08 | 1.29E+08 | 436 | 555 | 1.29E+08 | -0.1522  | 0.028182 | 0 |
| chr12 | 1.3E+08  | 1.3E+08  | 488 | 635 | 1.3E+08  | -0.18391 | 0.010675 | 0 |
| chr12 | 1.3E+08  | 1.3E+08  | 641 | 666 | 1.3E+08  | 0.140765 | 0.037733 | 0 |
| chr12 | 1.31E+08 | 1.31E+08 | 731 | 757 | 1.31E+08 | 0.145541 | 0.033039 | 0 |
| chr12 | 1.31E+08 | 1.31E+08 | 700 | 723 | 1.31E+08 | 0.149322 | 0.029675 | 0 |
| chr12 | 1.31E+08 | 1.31E+08 | 548 | 571 | 1.31E+08 | 0.136648 | 0.042204 | 0 |
| chr12 | 1.32E+08 | 1.32E+08 | 704 | 730 | 1.32E+08 | 0.143642 | 0.034845 | 0 |
| chr12 | 1.32E+08 | 1.32E+08 | 680 | 696 | 1.32E+08 | 0.16241  | 0.02015  | 0 |
| chr12 | 1.32E+08 | 1.32E+08 | 446 | 466 | 1.32E+08 | 0.132677 | 0.046915 | 0 |
| chr12 | 1.32E+08 | 1.32E+08 | 674 | 685 | 1.32E+08 | 0.172608 | 0.014659 | 0 |
| chr12 | 1.33E+08 | 1.33E+08 | 706 | 730 | 1.33E+08 | 0.147735 | 0.031051 | 0 |
| chr12 | 1.33E+08 | 1.33E+08 | 742 | 774 | 1.33E+08 | 0.135049 | 0.044053 | 0 |
| chr12 | 1.33E+08 | 1.33E+08 | 784 | 810 | 1.33E+08 | 0.148895 | 0.03004  | 0 |
| chr12 | 1.33E+08 | 1.33E+08 | 811 | 827 | 1.33E+08 | 0.167778 | 0.017074 | 0 |
| chr12 | 1.33E+08 | 1.33E+08 | 752 | 763 | 1.33E+08 | 0.175013 | 0.01357  | 0 |
| chr12 | 1.33E+08 | 1.33E+08 | 657 | 665 | 1.33E+08 | 0.178502 | 0.012115 | 0 |
| chr12 | 1.33E+08 | 1.34E+08 | 509 | 526 | 1.34E+08 | 0.148566 | 0.030324 | 0 |

|       |          |          |     |     |          |          |          |   |
|-------|----------|----------|-----|-----|----------|----------|----------|---|
| chr12 | 1.34E+08 | 1.34E+08 | 596 | 616 | 1.34E+08 | 0.148345 | 0.030516 | 0 |
| chr13 | 18950001 | 19050000 | 5   | 5   | 1.90E+07 | 0.195963 | 0.006694 | 0 |
| chr13 | 19100001 | 19200000 | 11  | 17  | 19150000 | -0.43207 | 5.86E-08 | 0 |
| chr13 | 19150001 | 19250000 | 23  | 32  | 19200000 | -0.28048 | 0.000244 | 0 |
| chr13 | 19250001 | 19350000 | 58  | 76  | 19300000 | -0.19398 | 0.007627 | 0 |
| chr13 | 21350001 | 21450000 | 670 | 668 | 21400000 | 0.200276 | 0.005743 | 0 |
| chr13 | 21400001 | 21500000 | 614 | 598 | 21450000 | 0.234056 | 0.001579 | 0 |
| chr13 | 21450001 | 21550000 | 526 | 519 | 21500000 | 0.215291 | 0.003301 | 0 |
| chr13 | 23000001 | 23100000 | 433 | 586 | 23050000 | -0.24057 | 0.001351 | 0 |
| chr13 | 23200001 | 23300000 | 407 | 567 | 23250000 | -0.28236 | 0.000224 | 0 |
| chr13 | 26600001 | 26700000 | 486 | 487 | 26650000 | 0.192998 | 0.007426 | 0 |
| chr13 | 26900001 | 27000000 | 503 | 502 | 26950000 | 0.198834 | 0.006047 | 0 |
| chr13 | 27750001 | 27850000 | 624 | 617 | 27800000 | 0.212239 | 0.003704 | 0 |
| chr13 | 27800001 | 27900000 | 665 | 624 | 27850000 | 0.287771 | 0.000145 | 0 |
| chr13 | 27850001 | 27950000 | 680 | 672 | 27900000 | 0.213037 | 0.003594 | 0 |
| chr13 | 30850001 | 30950000 | 671 | 674 | 30900000 | 0.189527 | 0.008372 | 0 |
| chr13 | 33750001 | 33850000 | 627 | 625 | 33800000 | 0.200572 | 0.005682 | 0 |
| chr13 | 34150001 | 34250000 | 644 | 630 | 34200000 | 0.227672 | 0.002041 | 0 |
| chr13 | 34650001 | 34750000 | 524 | 708 | 34700000 | -0.23822 | 0.001484 | 0 |
| chr13 | 34700001 | 34800000 | 491 | 653 | 34750000 | -0.2154  | 0.003568 | 0 |
| chr13 | 35050001 | 35150000 | 381 | 504 | 35100000 | -0.20767 | 0.004726 | 0 |
| chr13 | 35300001 | 35400000 | 426 | 557 | 35350000 | -0.19086 | 0.008477 | 0 |
| chr13 | 35500001 | 35600000 | 394 | 519 | 35550000 | -0.20158 | 0.005867 | 0 |
| chr13 | 35850001 | 35950000 | 367 | 515 | 35900000 | -0.29283 | 0.000138 | 0 |
| chr13 | 35900001 | 36000000 | 372 | 496 | 35950000 | -0.21907 | 0.003112 | 0 |
| chr13 | 36050001 | 36150000 | 438 | 580 | 36100000 | -0.20916 | 0.00448  | 0 |
| chr13 | 36100001 | 36200000 | 434 | 601 | 36150000 | -0.27371 | 0.000331 | 0 |
| chr13 | 36150001 | 36250000 | 446 | 587 | 36200000 | -0.20035 | 0.006123 | 0 |
| chr13 | 36800001 | 36900000 | 486 | 636 | 36850000 | -0.19211 | 0.008128 | 0 |
| chr13 | 37700001 | 37800000 | 418 | 569 | 37750000 | -0.24896 | 0.000959 | 0 |
| chr13 | 38650001 | 38750000 | 365 | 499 | 38700000 | -0.25518 | 0.00074  | 0 |
| chr13 | 40550001 | 40650000 | 477 | 626 | 40600000 | -0.19621 | 0.007068 | 0 |
| chr13 | 41300001 | 41400000 | 489 | 457 | 41350000 | 0.293603 | 0.000109 | 0 |
| chr13 | 41350001 | 41450000 | 409 | 408 | 41400000 | 0.199495 | 0.005906 | 0 |
| chr13 | 41550001 | 41650000 | 609 | 608 | 41600000 | 0.198334 | 0.006155 | 0 |
| chr13 | 42950001 | 43050000 | 432 | 602 | 4.30E+07 | -0.28277 | 0.00022  | 0 |
| chr13 | 43000001 | 43100000 | 369 | 504 | 43050000 | -0.25384 | 0.000783 | 0 |
| chr13 | 46650001 | 46750000 | 490 | 644 | 46700000 | -0.19832 | 0.006573 | 0 |
| chr13 | 46950001 | 47050000 | 197 | 258 | 4.70E+07 | -0.19321 | 0.00783  | 0 |
| chr13 | 49550001 | 49650000 | 607 | 596 | 49600000 | 0.222347 | 0.002516 | 0 |
| chr13 | 49600001 | 49700000 | 643 | 602 | 49650000 | 0.291018 | 0.000124 | 0 |
| chr13 | 50550001 | 50650000 | 561 | 554 | 50600000 | 0.214078 | 0.003456 | 0 |
| chr13 | 50600001 | 50700000 | 597 | 577 | 50650000 | 0.245123 | 0.000999 | 0 |
| chr13 | 52800001 | 52900000 | 55  | 96  | 52850000 | -0.60764 | 1.48E-13 | 0 |
| chr13 | 53100001 | 53200000 | 131 | 116 | 53150000 | 0.371405 | 1.58E-06 | 0 |
| chr13 | 53150001 | 53250000 | 362 | 350 | 53200000 | 0.244598 | 0.001021 | 0 |
| chr13 | 53650001 | 53750000 | 461 | 603 | 53700000 | -0.19143 | 0.008317 | 0 |

|       |          |          |     |     |          |          |          |   |
|-------|----------|----------|-----|-----|----------|----------|----------|---|
| chr13 | 53900001 | 54000000 | 428 | 606 | 53950000 | -0.30574 | 7.43E-05 | 0 |
| chr13 | 54200001 | 54300000 | 448 | 584 | 54250000 | -0.18651 | 0.009802 | 0 |
| chr13 | 54500001 | 54600000 | 382 | 508 | 54550000 | -0.21529 | 0.003581 | 0 |
| chr13 | 54550001 | 54650000 | 357 | 470 | 54600000 | -0.20077 | 0.006034 | 0 |
| chr13 | 54750001 | 54850000 | 386 | 523 | 54800000 | -0.24225 | 0.001263 | 0 |
| chr13 | 54800001 | 54900000 | 362 | 509 | 54850000 | -0.29571 | 0.00012  | 0 |
| chr13 | 55000001 | 55100000 | 373 | 488 | 55050000 | -0.19174 | 0.008229 | 0 |
| chr13 | 55350001 | 55450000 | 359 | 493 | 55400000 | -0.26164 | 0.000562 | 0 |
| chr13 | 55400001 | 55500000 | 360 | 495 | 55450000 | -0.26347 | 0.000519 | 0 |
| chr13 | 55450001 | 55550000 | 365 | 480 | 55500000 | -0.19917 | 0.00638  | 0 |
| chr13 | 55500001 | 55600000 | 378 | 495 | 55550000 | -0.19308 | 0.007865 | 0 |
| chr13 | 55750001 | 55850000 | 372 | 495 | 55800000 | -0.21616 | 0.003468 | 0 |
| chr13 | 55800001 | 55900000 | 432 | 576 | 55850000 | -0.21907 | 0.003112 | 0 |
| chr13 | 56000001 | 56100000 | 611 | 804 | 56050000 | -0.20006 | 0.006186 | 0 |
| chr13 | 56250001 | 56350000 | 602 | 796 | 56300000 | -0.20704 | 0.004834 | 0 |
| chr13 | 56300001 | 56400000 | 587 | 773 | 56350000 | -0.20114 | 0.005956 | 0 |
| chr13 | 56550001 | 56650000 | 560 | 738 | 56600000 | -0.20223 | 0.005733 | 0 |
| chr13 | 56600001 | 56700000 | 517 | 685 | 56650000 | -0.20998 | 0.004349 | 0 |
| chr13 | 56750001 | 56850000 | 610 | 808 | 56800000 | -0.20958 | 0.004412 | 0 |
| chr13 | 56800001 | 56900000 | 623 | 821 | 56850000 | -0.20219 | 0.005742 | 0 |
| chr13 | 56850001 | 56950000 | 614 | 805 | 56900000 | -0.19479 | 0.007421 | 0 |
| chr13 | 56900001 | 57000000 | 542 | 773 | 56950000 | -0.31621 | 4.43E-05 | 0 |
| chr13 | 56950001 | 57050000 | 549 | 743 | 5.70E+07 | -0.24059 | 0.00135  | 0 |
| chr13 | 57200001 | 57300000 | 571 | 756 | 57250000 | -0.20893 | 0.004516 | 0 |
| chr13 | 57600001 | 57700000 | 530 | 704 | 57650000 | -0.21362 | 0.003809 | 0 |
| chr13 | 57700001 | 57800000 | 161 | 222 | 57750000 | -0.26754 | 0.000435 | 0 |
| chr13 | 57750001 | 57850000 | 327 | 468 | 57800000 | -0.32125 | 3.43E-05 | 0 |
| chr13 | 58200001 | 58300000 | 602 | 785 | 58250000 | -0.18697 | 0.009654 | 0 |
| chr13 | 58750001 | 58850000 | 593 | 778 | 58800000 | -0.19578 | 0.007174 | 0 |
| chr13 | 58800001 | 58900000 | 598 | 817 | 58850000 | -0.25423 | 0.00077  | 0 |
| chr13 | 59300001 | 59400000 | 557 | 784 | 59350000 | -0.29721 | 0.000112 | 0 |
| chr13 | 59350001 | 59450000 | 595 | 785 | 59400000 | -0.20384 | 0.005417 | 0 |
| chr13 | 60800001 | 60900000 | 598 | 833 | 60850000 | -0.28221 | 0.000226 | 0 |
| chr13 | 61250001 | 61350000 | 626 | 839 | 61300000 | -0.22655 | 0.002345 | 0 |
| chr13 | 61850001 | 61950000 | 576 | 756 | 61900000 | -0.19635 | 0.007033 | 0 |
| chr13 | 62300001 | 62400000 | 574 | 819 | 62350000 | -0.31685 | 4.29E-05 | 0 |
| chr13 | 62350001 | 62450000 | 587 | 776 | 62400000 | -0.20673 | 0.004887 | 0 |
| chr13 | 62800001 | 62900000 | 617 | 822 | 62850000 | -0.2179  | 0.003251 | 0 |
| chr13 | 63100001 | 63200000 | 611 | 814 | 63150000 | -0.21789 | 0.003252 | 0 |
| chr13 | 63350001 | 63450000 | 670 | 891 | 63400000 | -0.2153  | 0.00358  | 0 |
| chr13 | 63400001 | 63500000 | 630 | 891 | 63450000 | -0.30411 | 8.04E-05 | 0 |
| chr13 | 63450001 | 63550000 | 550 | 732 | 63500000 | -0.21645 | 0.003432 | 0 |
| chr13 | 63750001 | 63850000 | 562 | 811 | 63800000 | -0.33317 | 1.86E-05 | 0 |
| chr13 | 63800001 | 63900000 | 656 | 883 | 63850000 | -0.23275 | 0.001843 | 0 |
| chr13 | 64200001 | 64300000 | 577 | 791 | 64250000 | -0.25914 | 0.000625 | 0 |
| chr13 | 64250001 | 64350000 | 375 | 511 | 64300000 | -0.25047 | 0.000901 | 0 |
| chr13 | 65000001 | 65100000 | 654 | 857 | 65050000 | -0.19404 | 0.007612 | 0 |

|       |          |          |     |     |          |          |          |   |
|-------|----------|----------|-----|-----|----------|----------|----------|---|
| chr13 | 65800001 | 65900000 | 651 | 888 | 65850000 | -0.25194 | 0.000848 | 0 |
| chr13 | 66100001 | 66200000 | 571 | 809 | 66150000 | -0.30669 | 7.09E-05 | 0 |
| chr13 | 66150001 | 66250000 | 581 | 792 | 66200000 | -0.251   | 0.000882 | 0 |
| chr13 | 67700001 | 67800000 | 699 | 937 | 67750000 | -0.22679 | 0.002323 | 0 |
| chr13 | 67850001 | 67950000 | 647 | 871 | 67900000 | -0.23294 | 0.001829 | 0 |
| chr13 | 68000001 | 68100000 | 605 | 838 | 68050000 | -0.27405 | 0.000326 | 0 |
| chr13 | 68050001 | 68150000 | 614 | 840 | 68100000 | -0.25619 | 0.000709 | 0 |
| chr13 | 68750001 | 68850000 | 670 | 890 | 68800000 | -0.21368 | 0.0038   | 0 |
| chr13 | 69200001 | 69300000 | 671 | 879 | 69250000 | -0.19359 | 0.007731 | 0 |
| chr13 | 69250001 | 69350000 | 652 | 857 | 69300000 | -0.19846 | 0.00654  | 0 |
| chr13 | 69300001 | 69400000 | 632 | 827 | 69350000 | -0.192   | 0.008158 | 0 |
| chr13 | 69850001 | 69950000 | 692 | 915 | 69900000 | -0.20704 | 0.004835 | 0 |
| chr13 | 70550001 | 70650000 | 644 | 853 | 70600000 | -0.20952 | 0.004421 | 0 |
| chr13 | 72450001 | 72550000 | 643 | 882 | 72500000 | -0.26    | 0.000603 | 0 |
| chr13 | 73250001 | 73350000 | 962 | 928 | 73300000 | 0.247875 | 0.000889 | 0 |
| chr13 | 74100001 | 74200000 | 751 | 991 | 74150000 | -0.20411 | 0.005366 | 0 |
| chr13 | 75100001 | 75200000 | 630 | 833 | 75150000 | -0.207   | 0.004841 | 0 |
| chr13 | 75150001 | 75250000 | 654 | 869 | 75200000 | -0.2141  | 0.003742 | 0 |
| chr13 | 75200001 | 75300000 | 633 | 842 | 75250000 | -0.21565 | 0.003534 | 0 |
| chr13 | 76850001 | 76950000 | 646 | 858 | 76900000 | -0.21348 | 0.003828 | 0 |
| chr13 | 77000001 | 77100000 | 706 | 933 | 77050000 | -0.20625 | 0.004973 | 0 |
| chr13 | 78750001 | 78850000 | 670 | 885 | 78800000 | -0.20555 | 0.005098 | 0 |
| chr13 | 80650001 | 80750000 | 610 | 802 | 80700000 | -0.19883 | 0.006456 | 0 |
| chr13 | 80700001 | 80800000 | 559 | 732 | 80750000 | -0.19303 | 0.007878 | 0 |
| chr13 | 80750001 | 80850000 | 546 | 728 | 80800000 | -0.21907 | 0.003112 | 0 |
| chr13 | 80800001 | 80900000 | 576 | 763 | 80850000 | -0.20965 | 0.004401 | 0 |
| chr13 | 81100001 | 81200000 | 608 | 808 | 81150000 | -0.21432 | 0.003712 | 0 |
| chr13 | 81150001 | 81250000 | 613 | 806 | 81200000 | -0.19893 | 0.006434 | 0 |
| chr13 | 81400001 | 81500000 | 565 | 752 | 81450000 | -0.21652 | 0.003423 | 0 |
| chr13 | 81450001 | 81550000 | 571 | 748 | 81500000 | -0.19358 | 0.007731 | 0 |
| chr13 | 81600001 | 81700000 | 556 | 740 | 81650000 | -0.21648 | 0.003428 | 0 |
| chr13 | 81650001 | 81750000 | 555 | 742 | 81700000 | -0.22297 | 0.002688 | 0 |
| chr13 | 82250001 | 82350000 | 548 | 717 | 82300000 | -0.19183 | 0.008204 | 0 |
| chr13 | 82350001 | 82450000 | 499 | 655 | 82400000 | -0.19649 | 0.007    | 0 |
| chr13 | 82600001 | 82700000 | 494 | 652 | 82650000 | -0.2044  | 0.005311 | 0 |
| chr13 | 82750001 | 82850000 | 548 | 748 | 82800000 | -0.2529  | 0.000814 | 0 |
| chr13 | 82800001 | 82900000 | 507 | 735 | 82850000 | -0.3398  | 1.31E-05 | 0 |
| chr13 | 82850001 | 82950000 | 555 | 772 | 82900000 | -0.28015 | 0.000248 | 0 |
| chr13 | 83150001 | 83250000 | 538 | 731 | 83200000 | -0.2463  | 0.00107  | 0 |
| chr13 | 83450001 | 83550000 | 558 | 763 | 83500000 | -0.25545 | 0.000731 | 0 |
| chr13 | 83600001 | 83700000 | 583 | 808 | 83650000 | -0.2749  | 0.000314 | 0 |
| chr13 | 83650001 | 83750000 | 548 | 744 | 83700000 | -0.24516 | 0.001121 | 0 |
| chr13 | 84200001 | 84300000 | 602 | 796 | 84250000 | -0.20704 | 0.004834 | 0 |
| chr13 | 84450001 | 84550000 | 506 | 686 | 84500000 | -0.24311 | 0.001219 | 0 |
| chr13 | 84750001 | 84850000 | 580 | 785 | 84800000 | -0.24068 | 0.001345 | 0 |
| chr13 | 84900001 | 85000000 | 585 | 778 | 84950000 | -0.21537 | 0.003571 | 0 |
| chr13 | 84950001 | 85050000 | 555 | 791 | 8.50E+07 | -0.31523 | 4.65E-05 | 0 |

|       |          |          |     |      |          |          |          |   |
|-------|----------|----------|-----|------|----------|----------|----------|---|
| chr13 | 85000001 | 85100000 | 574 | 791  | 85050000 | -0.26666 | 0.000452 | 0 |
| chr13 | 85100001 | 85200000 | 611 | 819  | 85150000 | -0.22673 | 0.002328 | 0 |
| chr13 | 85300001 | 85400000 | 602 | 834  | 85350000 | -0.27432 | 0.000322 | 0 |
| chr13 | 85350001 | 85450000 | 598 | 875  | 85400000 | -0.35317 | 6.38E-06 | 0 |
| chr13 | 85400001 | 85500000 | 610 | 834  | 85450000 | -0.25528 | 0.000737 | 0 |
| chr13 | 85950001 | 86050000 | 676 | 888  | 8.60E+07 | -0.19757 | 0.006744 | 0 |
| chr13 | 86000001 | 86100000 | 663 | 875  | 86050000 | -0.20431 | 0.005327 | 0 |
| chr13 | 86200001 | 86300000 | 700 | 930  | 86250000 | -0.21391 | 0.003768 | 0 |
| chr13 | 86550001 | 86650000 | 562 | 766  | 86600000 | -0.25081 | 0.000888 | 0 |
| chr13 | 86700001 | 86800000 | 351 | 472  | 86750000 | -0.23135 | 0.001947 | 0 |
| chr13 | 86950001 | 87050000 | 504 | 691  | 8.70E+07 | -0.2593  | 0.000621 | 0 |
| chr13 | 87000001 | 87100000 | 520 | 737  | 87050000 | -0.30719 | 6.92E-05 | 0 |
| chr13 | 88100001 | 88200000 | 600 | 782  | 88150000 | -0.18624 | 0.009888 | 0 |
| chr13 | 88200001 | 88300000 | 584 | 767  | 88250000 | -0.1973  | 0.006809 | 0 |
| chr13 | 88350001 | 88450000 | 578 | 820  | 88400000 | -0.30859 | 6.46E-05 | 0 |
| chr13 | 88400001 | 88500000 | 577 | 847  | 88450000 | -0.35783 | 4.94E-06 | 0 |
| chr13 | 88450001 | 88550000 | 613 | 810  | 88500000 | -0.20607 | 0.005004 | 0 |
| chr13 | 88750001 | 88850000 | 562 | 786  | 88800000 | -0.288   | 0.000173 | 0 |
| chr13 | 88800001 | 88900000 | 569 | 810  | 88850000 | -0.31353 | 5.06E-05 | 0 |
| chr13 | 88850001 | 88950000 | 570 | 767  | 88900000 | -0.2323  | 0.001876 | 0 |
| chr13 | 89000001 | 89100000 | 587 | 769  | 89050000 | -0.19366 | 0.007712 | 0 |
| chr13 | 89050001 | 89150000 | 588 | 793  | 89100000 | -0.23554 | 0.001651 | 0 |
| chr13 | 89100001 | 89200000 | 565 | 778  | 89150000 | -0.26556 | 0.000474 | 0 |
| chr13 | 89250001 | 89350000 | 573 | 813  | 89300000 | -0.30876 | 6.41E-05 | 0 |
| chr13 | 89800001 | 89900000 | 607 | 795  | 89850000 | -0.1933  | 0.007808 | 0 |
| chr13 | 90150001 | 90250000 | 616 | 815  | 90200000 | -0.20791 | 0.004686 | 0 |
| chr13 | 90400001 | 90500000 | 622 | 811  | 90450000 | -0.18682 | 0.0097   | 0 |
| chr13 | 90600001 | 90700000 | 640 | 837  | 90650000 | -0.19119 | 0.008383 | 0 |
| chr13 | 90750001 | 90850000 | 622 | 821  | 90800000 | -0.2045  | 0.005291 | 0 |
| chr13 | 91150001 | 91250000 | 673 | 903  | 91200000 | -0.22816 | 0.002204 | 0 |
| chr13 | 91200001 | 91300000 | 658 | 883  | 91250000 | -0.22836 | 0.002186 | 0 |
| chr13 | 91350001 | 91450000 | 630 | 852  | 91400000 | -0.23954 | 0.001408 | 0 |
| chr13 | 92100001 | 92200000 | 644 | 840  | 92150000 | -0.18737 | 0.009527 | 0 |
| chr13 | 92700001 | 92800000 | 528 | 696  | 92750000 | -0.20259 | 0.005662 | 0 |
| chr13 | 93850001 | 93950000 | 607 | 817  | 93900000 | -0.23268 | 0.001848 | 0 |
| chr13 | 93900001 | 94000000 | 590 | 812  | 93950000 | -0.2648  | 0.00049  | 0 |
| chr13 | 93950001 | 94050000 | 608 | 813  | 9.40E+07 | -0.22322 | 0.002662 | 0 |
| chr13 | 94000001 | 94100000 | 607 | 832  | 94050000 | -0.25892 | 0.000631 | 0 |
| chr13 | 94050001 | 94150000 | 588 | 768  | 94100000 | -0.18933 | 0.008925 | 0 |
| chr13 | 94150001 | 94250000 | 602 | 794  | 94200000 | -0.20341 | 0.0055   | 0 |
| chr13 | 94200001 | 94300000 | 581 | 765  | 94250000 | -0.20096 | 0.005995 | 0 |
| chr13 | 96400001 | 96500000 | 873 | 876  | 96450000 | 0.191014 | 0.007954 | 0 |
| chr13 | 97650001 | 97750000 | 782 | 1029 | 97700000 | -0.20004 | 0.006191 | 0 |
| chr13 | 1.01E+08 | 1.01E+08 | 901 | 907  | 1.01E+08 | 0.186388 | 0.009317 | 0 |
| chr13 | 1.03E+08 | 1.03E+08 | 670 | 884  | 1.03E+08 | -0.20392 | 0.005401 | 0 |
| chr13 | 1.04E+08 | 1.04E+08 | 698 | 914  | 1.04E+08 | -0.193   | 0.007885 | 0 |
| chr13 | 1.04E+08 | 1.04E+08 | 790 | 790  | 1.04E+08 | 0.195963 | 0.006694 | 0 |



|       |          |          |      |      |          |          |          |   |
|-------|----------|----------|------|------|----------|----------|----------|---|
| chr13 | 1.05E+08 | 1.05E+08 | 549  | 736  | 1.05E+08 | -0.22694 | 0.00231  | 0 |
| chr13 | 1.05E+08 | 1.05E+08 | 588  | 771  | 1.05E+08 | -0.19495 | 0.007379 | 0 |
| chr13 | 1.05E+08 | 1.05E+08 | 593  | 786  | 1.05E+08 | -0.21053 | 0.004262 | 0 |
| chr13 | 1.05E+08 | 1.06E+08 | 584  | 784  | 1.05E+08 | -0.22892 | 0.00214  | 0 |
| chr13 | 1.06E+08 | 1.06E+08 | 600  | 790  | 1.06E+08 | -0.20093 | 0.006002 | 0 |
| chr13 | 1.06E+08 | 1.06E+08 | 644  | 841  | 1.06E+08 | -0.18908 | 0.008998 | 0 |
| chr13 | 1.06E+08 | 1.06E+08 | 592  | 796  | 1.06E+08 | -0.23121 | 0.001958 | 0 |
| chr13 | 1.06E+08 | 1.06E+08 | 601  | 843  | 1.06E+08 | -0.2922  | 0.000142 | 0 |
| chr13 | 1.06E+08 | 1.06E+08 | 610  | 807  | 1.06E+08 | -0.2078  | 0.004705 | 0 |
| chr13 | 1.06E+08 | 1.07E+08 | 541  | 736  | 1.07E+08 | -0.24811 | 0.000993 | 0 |
| chr13 | 1.07E+08 | 1.07E+08 | 563  | 760  | 1.07E+08 | -0.2369  | 0.001564 | 0 |
| chr13 | 1.07E+08 | 1.07E+08 | 718  | 943  | 1.07E+08 | -0.19731 | 0.006805 | 0 |
| chr13 | 1.08E+08 | 1.08E+08 | 645  | 853  | 1.08E+08 | -0.20728 | 0.004792 | 0 |
| chr13 | 1.08E+08 | 1.08E+08 | 649  | 857  | 1.08E+08 | -0.20511 | 0.005178 | 0 |
| chr13 | 1.11E+08 | 1.11E+08 | 1091 | 1060 | 1.11E+08 | 0.23755  | 0.001369 | 0 |
| chr13 | 1.11E+08 | 1.11E+08 | 1016 | 1020 | 1.11E+08 | 0.190294 | 0.008154 | 0 |
| chr13 | 1.12E+08 | 1.12E+08 | 37   | 53   | 1.12E+08 | -0.3225  | 3.22E-05 | 0 |
| chr13 | 1.14E+08 | 1.14E+08 | 1213 | 1214 | 1.14E+08 | 0.194774 | 0.006979 | 0 |
| chr13 | 1.14E+08 | 1.14E+08 | 1212 | 1206 | 1.14E+08 | 0.203123 | 0.005183 | 0 |
| chr13 | 1.14E+08 | 1.14E+08 | 1173 | 1111 | 1.14E+08 | 0.274307 | 0.000274 | 0 |
| chr13 | 1.14E+08 | 1.14E+08 | 1092 | 1077 | 1.14E+08 | 0.215918 | 0.003223 | 0 |
| chr13 | 1.14E+08 | 1.14E+08 | 897  | 874  | 1.14E+08 | 0.233438 | 0.001619 | 0 |
| chr13 | 1.14E+08 | 1.14E+08 | 1016 | 959  | 1.14E+08 | 0.279261 | 0.000218 | 0 |
| chr13 | 1.14E+08 | 1.14E+08 | 1137 | 1103 | 1.14E+08 | 0.239762 | 0.00125  | 0 |
| chr13 | 1.14E+08 | 1.14E+08 | 1065 | 1064 | 1.14E+08 | 0.197318 | 0.006381 | 0 |
| chr13 | 1.14E+08 | 1.14E+08 | 269  | 265  | 1.14E+08 | 0.217577 | 0.003025 | 0 |
| chr13 | 1.14E+08 | 1.15E+08 | 861  | 856  | 1.14E+08 | 0.204365 | 0.004955 | 0 |
| chr13 | 1.14E+08 | 1.15E+08 | 1181 | 1131 | 1.15E+08 | 0.258373 | 0.000564 | 0 |
| chr13 | 1.15E+08 | 1.15E+08 | 1142 | 1087 | 1.15E+08 | 0.267174 | 0.000381 | 0 |
| chr13 | 1.15E+08 | 1.15E+08 | 152  | 99   | 1.15E+08 | 0.814534 | 4.55E-23 | 0 |
| chr13 | 1.15E+08 | 1.15E+08 | 680  | 661  | 1.15E+08 | 0.236848 | 0.001409 | 0 |
| chr13 | 19200001 | 19300000 | 40   | 51   | 19250000 | -0.15453 | 0.026356 | 0 |
| chr13 | 19300001 | 19400000 | 60   | 77   | 19350000 | -0.16393 | 0.019986 | 0 |
| chr13 | 19850001 | 19950000 | 323  | 407  | 19900000 | -0.13753 | 0.042205 | 0 |
| chr13 | 19950001 | 20050000 | 99   | 128  | 2.00E+07 | -0.17468 | 0.014358 | 0 |
| chr13 | 20000001 | 20100000 | 103  | 106  | 20050000 | 0.154543 | 0.025502 | 0 |
| chr13 | 20100001 | 20200000 | 308  | 388  | 20150000 | -0.13716 | 0.04262  | 0 |
| chr13 | 21150001 | 21250000 | 603  | 617  | 21200000 | 0.162851 | 0.019881 | 0 |
| chr13 | 21300001 | 21400000 | 635  | 652  | 21350000 | 0.157848 | 0.023124 | 0 |
| chr13 | 21650001 | 21750000 | 595  | 604  | 21700000 | 0.174304 | 0.013883 | 0 |
| chr13 | 23150001 | 23250000 | 381  | 479  | 23200000 | -0.13427 | 0.045992 | 0 |
| chr13 | 23400001 | 23500000 | 348  | 446  | 23450000 | -0.16199 | 0.021181 | 0 |
| chr13 | 23750001 | 23850000 | 475  | 496  | 23800000 | 0.13355  | 0.045844 | 0 |
| chr13 | 25450001 | 25550000 | 393  | 406  | 25500000 | 0.149013 | 0.029939 | 0 |
| chr13 | 25850001 | 25950000 | 567  | 589  | 25900000 | 0.141044 | 0.037445 | 0 |
| chr13 | 25900001 | 26000000 | 562  | 582  | 25950000 | 0.145514 | 0.033065 | 0 |
| chr13 | 26350001 | 26450000 | 490  | 616  | 26400000 | -0.13419 | 0.046095 | 0 |

|       |          |          |     |     |          |          |          |   |
|-------|----------|----------|-----|-----|----------|----------|----------|---|
| chr13 | 26400001 | 26500000 | 485 | 622 | 26450000 | -0.16297 | 0.020574 | 0 |
| chr13 | 27500001 | 27600000 | 713 | 738 | 27550000 | 0.146244 | 0.032391 | 0 |
| chr13 | 28250001 | 28350000 | 527 | 663 | 28300000 | -0.13524 | 0.044836 | 0 |
| chr13 | 28500001 | 28600000 | 576 | 590 | 28550000 | 0.161317 | 0.020831 | 0 |
| chr13 | 28550001 | 28650000 | 536 | 553 | 28600000 | 0.150917 | 0.028344 | 0 |
| chr13 | 29150001 | 29250000 | 543 | 695 | 29200000 | -0.1601  | 0.022406 | 0 |
| chr13 | 29500001 | 29600000 | 503 | 631 | 29550000 | -0.13112 | 0.049911 | 0 |
| chr13 | 29800001 | 29900000 | 495 | 637 | 29850000 | -0.1679  | 0.01772  | 0 |
| chr13 | 30000001 | 30100000 | 659 | 684 | 30050000 | 0.142245 | 0.036224 | 0 |
| chr13 | 30650001 | 30750000 | 693 | 721 | 30700000 | 0.138819 | 0.039796 | 0 |
| chr13 | 30700001 | 30800000 | 649 | 671 | 30750000 | 0.147869 | 0.030933 | 0 |
| chr13 | 30750001 | 30850000 | 502 | 523 | 30800000 | 0.136839 | 0.041987 | 0 |
| chr13 | 30800001 | 30900000 | 544 | 551 | 30850000 | 0.177517 | 0.012511 | 0 |
| chr13 | 31700001 | 31800000 | 549 | 699 | 31750000 | -0.15252 | 0.027921 | 0 |
| chr13 | 31750001 | 31850000 | 491 | 623 | 31800000 | -0.14755 | 0.032131 | 0 |
| chr13 | 31850001 | 31950000 | 413 | 536 | 31900000 | -0.18013 | 0.012071 | 0 |
| chr13 | 31900001 | 32000000 | 464 | 587 | 31950000 | -0.14327 | 0.036155 | 0 |
| chr13 | 32450001 | 32550000 | 482 | 614 | 32500000 | -0.15324 | 0.027353 | 0 |
| chr13 | 32600001 | 32700000 | 513 | 655 | 32650000 | -0.15657 | 0.024846 | 0 |
| chr13 | 33150001 | 33250000 | 550 | 564 | 33200000 | 0.159699 | 0.021875 | 0 |
| chr13 | 33700001 | 33800000 | 608 | 623 | 33750000 | 0.160802 | 0.021159 | 0 |
| chr13 | 34200001 | 34300000 | 648 | 656 | 34250000 | 0.178261 | 0.012211 | 0 |
| chr13 | 34550001 | 34650000 | 480 | 612 | 34600000 | -0.15453 | 0.026356 | 0 |
| chr13 | 34600001 | 34700000 | 527 | 676 | 34650000 | -0.16326 | 0.020396 | 0 |
| chr13 | 34800001 | 34900000 | 457 | 582 | 34850000 | -0.15286 | 0.027652 | 0 |
| chr13 | 35100001 | 35200000 | 453 | 586 | 35150000 | -0.17543 | 0.014024 | 0 |
| chr13 | 35150001 | 35250000 | 479 | 604 | 35200000 | -0.13856 | 0.041065 | 0 |
| chr13 | 35600001 | 35700000 | 323 | 412 | 35650000 | -0.15515 | 0.025894 | 0 |
| chr13 | 35650001 | 35750000 | 378 | 476 | 35700000 | -0.13661 | 0.043246 | 0 |
| chr13 | 35800001 | 35900000 | 399 | 505 | 35850000 | -0.14393 | 0.035509 | 0 |
| chr13 | 36300001 | 36400000 | 495 | 631 | 36350000 | -0.15425 | 0.026574 | 0 |
| chr13 | 36900001 | 37000000 | 528 | 549 | 36950000 | 0.139695 | 0.038857 | 0 |
| chr13 | 37650001 | 37750000 | 468 | 593 | 37700000 | -0.14556 | 0.033952 | 0 |
| chr13 | 37750001 | 37850000 | 443 | 572 | 37800000 | -0.17275 | 0.015256 | 0 |
| chr13 | 38050001 | 38150000 | 431 | 556 | 38100000 | -0.17143 | 0.015892 | 0 |
| chr13 | 38100001 | 38200000 | 436 | 560 | 38150000 | -0.16514 | 0.019275 | 0 |
| chr13 | 38150001 | 38250000 | 499 | 626 | 38200000 | -0.13116 | 0.049858 | 0 |
| chr13 | 38600001 | 38700000 | 360 | 466 | 38650000 | -0.17637 | 0.013611 | 0 |
| chr13 | 39000001 | 39100000 | 426 | 535 | 39050000 | -0.13272 | 0.047885 | 0 |
| chr13 | 39050001 | 39150000 | 433 | 546 | 39100000 | -0.13857 | 0.041052 | 0 |
| chr13 | 39750001 | 39850000 | 461 | 587 | 39800000 | -0.15263 | 0.027836 | 0 |
| chr13 | 39800001 | 39900000 | 484 | 627 | 39850000 | -0.1775  | 0.013133 | 0 |
| chr13 | 40400001 | 40500000 | 520 | 543 | 40450000 | 0.133522 | 0.045878 | 0 |
| chr13 | 41000001 | 41100000 | 546 | 693 | 41050000 | -0.14799 | 0.031734 | 0 |
| chr13 | 41500001 | 41600000 | 608 | 627 | 41550000 | 0.151569 | 0.027814 | 0 |
| chr13 | 42100001 | 42200000 | 568 | 592 | 42150000 | 0.136257 | 0.042651 | 0 |
| chr13 | 42200001 | 42300000 | 623 | 645 | 42250000 | 0.145896 | 0.032711 | 0 |

|       |          |          |     |     |          |          |          |   |
|-------|----------|----------|-----|-----|----------|----------|----------|---|
| chr13 | 43350001 | 43450000 | 461 | 589 | 43400000 | -0.15754 | 0.024157 | 0 |
| chr13 | 43950001 | 44050000 | 521 | 677 | 4.40E+07 | -0.18191 | 0.011395 | 0 |
| chr13 | 44700001 | 44800000 | 725 | 755 | 44750000 | 0.137467 | 0.041282 | 0 |
| chr13 | 44850001 | 44950000 | 708 | 738 | 44900000 | 0.136092 | 0.04284  | 0 |
| chr13 | 45150001 | 45250000 | 504 | 655 | 45200000 | -0.18211 | 0.011322 | 0 |
| chr13 | 45850001 | 45950000 | 610 | 631 | 45900000 | 0.147132 | 0.031587 | 0 |
| chr13 | 45900001 | 46000000 | 547 | 565 | 45950000 | 0.149253 | 0.029734 | 0 |
| chr13 | 45950001 | 46050000 | 534 | 555 | 4.60E+07 | 0.140315 | 0.038202 | 0 |
| chr13 | 46000001 | 46100000 | 579 | 605 | 46050000 | 0.132591 | 0.047021 | 0 |
| chr13 | 48050001 | 48150000 | 504 | 633 | 48100000 | -0.13282 | 0.047766 | 0 |
| chr13 | 49650001 | 49750000 | 553 | 576 | 49700000 | 0.137174 | 0.041611 | 0 |
| chr13 | 50100001 | 50200000 | 562 | 583 | 50150000 | 0.143037 | 0.035436 | 0 |
| chr13 | 50450001 | 50550000 | 480 | 502 | 50500000 | 0.13131  | 0.048631 | 0 |
| chr13 | 51100001 | 51200000 | 530 | 679 | 51150000 | -0.16146 | 0.021522 | 0 |
| chr13 | 51950001 | 52050000 | 632 | 654 | 5.20E+07 | 0.146597 | 0.03207  | 0 |
| chr13 | 52000001 | 52100000 | 622 | 642 | 52050000 | 0.150304 | 0.028849 | 0 |
| chr13 | 52150001 | 52250000 | 646 | 673 | 52200000 | 0.136891 | 0.041929 | 0 |
| chr13 | 52200001 | 52300000 | 562 | 576 | 52250000 | 0.160464 | 0.021376 | 0 |
| chr13 | 52300001 | 52400000 | 696 | 722 | 52350000 | 0.143052 | 0.035422 | 0 |
| chr13 | 52550001 | 52650000 | 514 | 533 | 52600000 | 0.143596 | 0.03489  | 0 |
| chr13 | 52850001 | 52950000 | 202 | 259 | 52900000 | -0.16263 | 0.02078  | 0 |
| chr13 | 53300001 | 53400000 | 568 | 584 | 53350000 | 0.155886 | 0.024512 | 0 |
| chr13 | 53600001 | 53700000 | 479 | 603 | 53650000 | -0.13617 | 0.043755 | 0 |
| chr13 | 53750001 | 53850000 | 460 | 584 | 53800000 | -0.14837 | 0.031399 | 0 |
| chr13 | 53950001 | 54050000 | 436 | 550 | 5.40E+07 | -0.13914 | 0.040432 | 0 |
| chr13 | 54150001 | 54250000 | 378 | 478 | 54200000 | -0.14266 | 0.036763 | 0 |
| chr13 | 54850001 | 54950000 | 368 | 477 | 54900000 | -0.17832 | 0.012792 | 0 |
| chr13 | 55200001 | 55300000 | 374 | 475 | 55250000 | -0.14893 | 0.030914 | 0 |
| chr13 | 55550001 | 55650000 | 384 | 499 | 55600000 | -0.18197 | 0.011373 | 0 |
| chr13 | 55850001 | 55950000 | 585 | 762 | 55900000 | -0.18539 | 0.01017  | 0 |
| chr13 | 55950001 | 56050000 | 644 | 818 | 5.60E+07 | -0.14908 | 0.030783 | 0 |
| chr13 | 56200001 | 56300000 | 622 | 797 | 56250000 | -0.1617  | 0.021365 | 0 |
| chr13 | 56350001 | 56450000 | 641 | 824 | 56400000 | -0.16636 | 0.018574 | 0 |
| chr13 | 56400001 | 56500000 | 664 | 842 | 56450000 | -0.14667 | 0.032921 | 0 |
| chr13 | 56650001 | 56750000 | 553 | 707 | 56700000 | -0.15847 | 0.023508 | 0 |
| chr13 | 56700001 | 56800000 | 594 | 751 | 56750000 | -0.14239 | 0.037039 | 0 |
| chr13 | 57050001 | 57150000 | 602 | 763 | 57100000 | -0.14596 | 0.033582 | 0 |
| chr13 | 57100001 | 57200000 | 574 | 734 | 57150000 | -0.15877 | 0.023303 | 0 |
| chr13 | 57250001 | 57350000 | 573 | 743 | 57300000 | -0.17886 | 0.012571 | 0 |
| chr13 | 57400001 | 57500000 | 618 | 796 | 57450000 | -0.1692  | 0.017029 | 0 |
| chr13 | 57450001 | 57550000 | 615 | 773 | 57500000 | -0.13392 | 0.046418 | 0 |
| chr13 | 57500001 | 57600000 | 537 | 678 | 57550000 | -0.1404  | 0.039086 | 0 |
| chr13 | 57550001 | 57650000 | 513 | 662 | 57600000 | -0.17191 | 0.015659 | 0 |
| chr13 | 57650001 | 57750000 | 370 | 470 | 57700000 | -0.14917 | 0.030701 | 0 |
| chr13 | 58150001 | 58250000 | 620 | 778 | 58200000 | -0.13154 | 0.049374 | 0 |
| chr13 | 58300001 | 58400000 | 598 | 763 | 58350000 | -0.15557 | 0.025576 | 0 |
| chr13 | 58550001 | 58650000 | 611 | 781 | 58600000 | -0.15819 | 0.023702 | 0 |

|       |          |          |     |     |          |          |          |   |
|-------|----------|----------|-----|-----|----------|----------|----------|---|
| chr13 | 58650001 | 58750000 | 617 | 775 | 58700000 | -0.13296 | 0.047588 | 0 |
| chr13 | 58700001 | 58800000 | 577 | 745 | 58750000 | -0.17271 | 0.015275 | 0 |
| chr13 | 59150001 | 59250000 | 611 | 780 | 59200000 | -0.15634 | 0.025015 | 0 |
| chr13 | 59600001 | 59700000 | 587 | 763 | 59650000 | -0.18236 | 0.01123  | 0 |
| chr13 | 59800001 | 59900000 | 666 | 866 | 59850000 | -0.18288 | 0.011041 | 0 |
| chr13 | 59850001 | 59950000 | 661 | 858 | 59900000 | -0.18036 | 0.011979 | 0 |
| chr13 | 60150001 | 60250000 | 702 | 913 | 60200000 | -0.18318 | 0.010934 | 0 |
| chr13 | 60750001 | 60850000 | 629 | 809 | 60800000 | -0.16712 | 0.01815  | 0 |
| chr13 | 60850001 | 60950000 | 713 | 911 | 60900000 | -0.15759 | 0.024123 | 0 |
| chr13 | 61300001 | 61400000 | 608 | 787 | 61350000 | -0.17633 | 0.013629 | 0 |
| chr13 | 61350001 | 61450000 | 569 | 729 | 61400000 | -0.16153 | 0.021477 | 0 |
| chr13 | 61400001 | 61500000 | 590 | 757 | 61450000 | -0.16362 | 0.020178 | 0 |
| chr13 | 61550001 | 61650000 | 648 | 830 | 61600000 | -0.16115 | 0.021716 | 0 |
| chr13 | 61600001 | 61700000 | 615 | 790 | 61650000 | -0.1653  | 0.019177 | 0 |
| chr13 | 61800001 | 61900000 | 590 | 755 | 61850000 | -0.1598  | 0.022605 | 0 |
| chr13 | 62050001 | 62150000 | 605 | 766 | 62100000 | -0.14445 | 0.035011 | 0 |
| chr13 | 62850001 | 62950000 | 621 | 802 | 62900000 | -0.17305 | 0.015114 | 0 |
| chr13 | 62900001 | 63000000 | 666 | 837 | 62950000 | -0.13374 | 0.046632 | 0 |
| chr13 | 63050001 | 63150000 | 644 | 834 | 63100000 | -0.17702 | 0.013332 | 0 |
| chr13 | 63700001 | 63800000 | 596 | 763 | 63750000 | -0.16041 | 0.022202 | 0 |
| chr13 | 63900001 | 64000000 | 680 | 854 | 63950000 | -0.13274 | 0.047866 | 0 |
| chr13 | 64150001 | 64250000 | 678 | 876 | 64200000 | -0.17368 | 0.014815 | 0 |
| chr13 | 64300001 | 64400000 | 183 | 236 | 64350000 | -0.17098 | 0.016117 | 0 |
| chr13 | 64550001 | 64650000 | 660 | 836 | 64600000 | -0.14507 | 0.034411 | 0 |
| chr13 | 64700001 | 64800000 | 630 | 814 | 64750000 | -0.17371 | 0.014801 | 0 |
| chr13 | 65050001 | 65150000 | 659 | 842 | 65100000 | -0.15758 | 0.024128 | 0 |
| chr13 | 65400001 | 65500000 | 650 | 833 | 65450000 | -0.16191 | 0.021231 | 0 |
| chr13 | 65450001 | 65550000 | 667 | 851 | 65500000 | -0.15551 | 0.025624 | 0 |
| chr13 | 65850001 | 65950000 | 683 | 889 | 65900000 | -0.18433 | 0.010529 | 0 |
| chr13 | 65950001 | 66050000 | 572 | 727 | 6.60E+07 | -0.14998 | 0.030013 | 0 |
| chr13 | 66050001 | 66150000 | 641 | 806 | 66100000 | -0.13449 | 0.045727 | 0 |
| chr13 | 67150001 | 67250000 | 766 | 796 | 67200000 | 0.140539 | 0.037968 | 0 |
| chr13 | 67250001 | 67350000 | 612 | 791 | 67300000 | -0.17418 | 0.014584 | 0 |
| chr13 | 67900001 | 68000000 | 643 | 819 | 67950000 | -0.15308 | 0.027479 | 0 |
| chr13 | 68350001 | 68450000 | 608 | 772 | 68400000 | -0.14857 | 0.031228 | 0 |
| chr13 | 68400001 | 68500000 | 539 | 684 | 68450000 | -0.14775 | 0.031951 | 0 |
| chr13 | 68700001 | 68800000 | 708 | 910 | 68750000 | -0.16615 | 0.018689 | 0 |
| chr13 | 68850001 | 68950000 | 679 | 852 | 68900000 | -0.13148 | 0.04945  | 0 |
| chr13 | 68900001 | 69000000 | 675 | 875 | 68950000 | -0.17843 | 0.012746 | 0 |
| chr13 | 69150001 | 69250000 | 662 | 840 | 69200000 | -0.1476  | 0.032088 | 0 |
| chr13 | 69350001 | 69450000 | 631 | 811 | 69400000 | -0.1661  | 0.01872  | 0 |
| chr13 | 69400001 | 69500000 | 602 | 774 | 69450000 | -0.16661 | 0.018434 | 0 |
| chr13 | 69900001 | 70000000 | 698 | 886 | 69950000 | -0.14812 | 0.031623 | 0 |
| chr13 | 70250001 | 70350000 | 645 | 832 | 70300000 | -0.17132 | 0.015948 | 0 |
| chr13 | 70500001 | 70600000 | 686 | 872 | 70550000 | -0.15016 | 0.029862 | 0 |
| chr13 | 70600001 | 70700000 | 639 | 820 | 70650000 | -0.16384 | 0.020039 | 0 |
| chr13 | 70650001 | 70750000 | 650 | 845 | 70700000 | -0.18255 | 0.011161 | 0 |

|       |          |          |     |      |          |          |          |   |
|-------|----------|----------|-----|------|----------|----------|----------|---|
| chr13 | 71450001 | 71550000 | 656 | 834  | 71500000 | -0.15039 | 0.029667 | 0 |
| chr13 | 71600001 | 71700000 | 646 | 825  | 71650000 | -0.1569  | 0.024613 | 0 |
| chr13 | 71650001 | 71750000 | 625 | 805  | 71700000 | -0.16917 | 0.017044 | 0 |
| chr13 | 71700001 | 71800000 | 606 | 771  | 71750000 | -0.15145 | 0.028788 | 0 |
| chr13 | 71750001 | 71850000 | 632 | 809  | 71800000 | -0.16025 | 0.022304 | 0 |
| chr13 | 72000001 | 72100000 | 672 | 870  | 72050000 | -0.17659 | 0.013516 | 0 |
| chr13 | 72400001 | 72500000 | 700 | 892  | 72450000 | -0.15373 | 0.026976 | 0 |
| chr13 | 72500001 | 72600000 | 664 | 849  | 72550000 | -0.15862 | 0.023404 | 0 |
| chr13 | 72850001 | 72950000 | 713 | 898  | 72900000 | -0.13685 | 0.042975 | 0 |
| chr13 | 73300001 | 73400000 | 942 | 981  | 73350000 | 0.137437 | 0.041316 | 0 |
| chr13 | 74600001 | 74700000 | 789 | 994  | 74650000 | -0.13726 | 0.042513 | 0 |
| chr13 | 75050001 | 75150000 | 621 | 799  | 75100000 | -0.16764 | 0.017863 | 0 |
| chr13 | 75250001 | 75350000 | 690 | 876  | 75300000 | -0.14837 | 0.031399 | 0 |
| chr13 | 76400001 | 76500000 | 825 | 1066 | 76450000 | -0.17378 | 0.014771 | 0 |
| chr13 | 76450001 | 76550000 | 762 | 975  | 76500000 | -0.15965 | 0.022706 | 0 |
| chr13 | 76600001 | 76700000 | 700 | 888  | 76650000 | -0.14724 | 0.032405 | 0 |
| chr13 | 76650001 | 76750000 | 740 | 938  | 76700000 | -0.1461  | 0.03345  | 0 |
| chr13 | 76800001 | 76900000 | 667 | 838  | 76850000 | -0.1333  | 0.047172 | 0 |
| chr13 | 76900001 | 77000000 | 642 | 810  | 76950000 | -0.13939 | 0.040167 | 0 |
| chr13 | 76950001 | 77050000 | 691 | 886  | 7.70E+07 | -0.16266 | 0.020765 | 0 |
| chr13 | 77100001 | 77200000 | 598 | 758  | 77150000 | -0.14609 | 0.033459 | 0 |
| chr13 | 77150001 | 77250000 | 648 | 833  | 77200000 | -0.16636 | 0.018573 | 0 |
| chr13 | 78550001 | 78650000 | 662 | 841  | 78600000 | -0.14931 | 0.030581 | 0 |
| chr13 | 78700001 | 78800000 | 654 | 851  | 78750000 | -0.18391 | 0.010678 | 0 |
| chr13 | 78850001 | 78950000 | 683 | 859  | 78900000 | -0.13481 | 0.045349 | 0 |
| chr13 | 78900001 | 79000000 | 688 | 876  | 78950000 | -0.15256 | 0.027892 | 0 |
| chr13 | 79050001 | 79150000 | 619 | 779  | 79100000 | -0.13572 | 0.044276 | 0 |
| chr13 | 79300001 | 79400000 | 703 | 885  | 79350000 | -0.13619 | 0.043732 | 0 |
| chr13 | 79650001 | 79750000 | 648 | 817  | 79700000 | -0.13838 | 0.041263 | 0 |
| chr13 | 79750001 | 79850000 | 679 | 861  | 79800000 | -0.14664 | 0.032953 | 0 |
| chr13 | 80600001 | 80700000 | 674 | 872  | 80650000 | -0.17562 | 0.01394  | 0 |
| chr13 | 80950001 | 81050000 | 643 | 808  | 8.10E+07 | -0.13357 | 0.046838 | 0 |
| chr13 | 82100001 | 82200000 | 558 | 722  | 82150000 | -0.17577 | 0.013872 | 0 |
| chr13 | 82300001 | 82400000 | 533 | 693  | 82350000 | -0.18276 | 0.011086 | 0 |
| chr13 | 82550001 | 82650000 | 557 | 715  | 82600000 | -0.1643  | 0.019765 | 0 |
| chr13 | 82900001 | 83000000 | 559 | 716  | 82950000 | -0.16115 | 0.02172  | 0 |
| chr13 | 83000001 | 83100000 | 549 | 695  | 83050000 | -0.14424 | 0.035206 | 0 |
| chr13 | 83100001 | 83200000 | 569 | 721  | 83150000 | -0.14561 | 0.033908 | 0 |
| chr13 | 83300001 | 83400000 | 599 | 755  | 83350000 | -0.13796 | 0.041729 | 0 |
| chr13 | 83350001 | 83450000 | 582 | 740  | 83400000 | -0.15054 | 0.029537 | 0 |
| chr13 | 84050001 | 84150000 | 611 | 791  | 84100000 | -0.17654 | 0.013537 | 0 |
| chr13 | 84150001 | 84250000 | 573 | 742  | 84200000 | -0.17692 | 0.013375 | 0 |
| chr13 | 84500001 | 84600000 | 538 | 694  | 84550000 | -0.17137 | 0.015925 | 0 |
| chr13 | 84700001 | 84800000 | 592 | 760  | 84750000 | -0.16444 | 0.019684 | 0 |
| chr13 | 84800001 | 84900000 | 604 | 773  | 84850000 | -0.15996 | 0.0225   | 0 |
| chr13 | 85150001 | 85250000 | 643 | 813  | 85200000 | -0.14247 | 0.036952 | 0 |
| chr13 | 85450001 | 85550000 | 646 | 829  | 85500000 | -0.16387 | 0.020021 | 0 |

|       |          |          |     |      |          |          |          |   |
|-------|----------|----------|-----|------|----------|----------|----------|---|
| chr13 | 85600001 | 85700000 | 614 | 782  | 85650000 | -0.15297 | 0.027569 | 0 |
| chr13 | 85650001 | 85750000 | 611 | 767  | 85700000 | -0.13209 | 0.048675 | 0 |
| chr13 | 86050001 | 86150000 | 688 | 882  | 86100000 | -0.16241 | 0.020921 | 0 |
| chr13 | 86250001 | 86350000 | 689 | 875  | 86300000 | -0.14882 | 0.03101  | 0 |
| chr13 | 86400001 | 86500000 | 606 | 766  | 86450000 | -0.14206 | 0.037366 | 0 |
| chr13 | 86450001 | 86550000 | 600 | 768  | 86500000 | -0.16018 | 0.022351 | 0 |
| chr13 | 86500001 | 86600000 | 598 | 777  | 86550000 | -0.18181 | 0.011434 | 0 |
| chr13 | 86650001 | 86750000 | 599 | 755  | 86700000 | -0.13796 | 0.041729 | 0 |
| chr13 | 87150001 | 87250000 | 551 | 700  | 87200000 | -0.14934 | 0.030557 | 0 |
| chr13 | 87350001 | 87450000 | 610 | 771  | 87400000 | -0.14196 | 0.037473 | 0 |
| chr13 | 87550001 | 87650000 | 570 | 729  | 87600000 | -0.15899 | 0.023148 | 0 |
| chr13 | 87800001 | 87900000 | 565 | 719  | 87850000 | -0.15178 | 0.028521 | 0 |
| chr13 | 87850001 | 87950000 | 605 | 771  | 87900000 | -0.15383 | 0.026894 | 0 |
| chr13 | 88050001 | 88150000 | 560 | 720  | 88100000 | -0.16661 | 0.018434 | 0 |
| chr13 | 88150001 | 88250000 | 601 | 770  | 88200000 | -0.16153 | 0.021475 | 0 |
| chr13 | 88500001 | 88600000 | 599 | 772  | 88550000 | -0.17008 | 0.016572 | 0 |
| chr13 | 88550001 | 88650000 | 577 | 750  | 88600000 | -0.18236 | 0.011231 | 0 |
| chr13 | 88700001 | 88800000 | 601 | 767  | 88750000 | -0.1559  | 0.025337 | 0 |
| chr13 | 89200001 | 89300000 | 615 | 790  | 89250000 | -0.1653  | 0.019177 | 0 |
| chr13 | 89300001 | 89400000 | 602 | 772  | 89350000 | -0.16287 | 0.020631 | 0 |
| chr13 | 89350001 | 89450000 | 623 | 792  | 89400000 | -0.15031 | 0.029737 | 0 |
| chr13 | 89400001 | 89500000 | 583 | 748  | 89450000 | -0.16358 | 0.0202   | 0 |
| chr13 | 89450001 | 89550000 | 616 | 773  | 89500000 | -0.13158 | 0.049328 | 0 |
| chr13 | 89600001 | 89700000 | 614 | 774  | 89650000 | -0.13813 | 0.041536 | 0 |
| chr13 | 89650001 | 89750000 | 590 | 744  | 89700000 | -0.13862 | 0.040994 | 0 |
| chr13 | 89700001 | 89800000 | 556 | 701  | 89750000 | -0.13837 | 0.041277 | 0 |
| chr13 | 90100001 | 90200000 | 634 | 809  | 90150000 | -0.15569 | 0.025488 | 0 |
| chr13 | 90550001 | 90650000 | 646 | 813  | 90600000 | -0.13576 | 0.044232 | 0 |
| chr13 | 90700001 | 90800000 | 641 | 819  | 90750000 | -0.15758 | 0.02413  | 0 |
| chr13 | 90800001 | 90900000 | 607 | 777  | 90850000 | -0.16026 | 0.022302 | 0 |
| chr13 | 90850001 | 90950000 | 607 | 772  | 90900000 | -0.15094 | 0.029206 | 0 |
| chr13 | 91300001 | 91400000 | 606 | 768  | 91350000 | -0.14583 | 0.033704 | 0 |
| chr13 | 91400001 | 91500000 | 594 | 764  | 91450000 | -0.16715 | 0.018133 | 0 |
| chr13 | 92450001 | 92550000 | 541 | 689  | 92500000 | -0.15291 | 0.027612 | 0 |
| chr13 | 92750001 | 92850000 | 611 | 776  | 92800000 | -0.14892 | 0.030918 | 0 |
| chr13 | 93250001 | 93350000 | 485 | 501  | 93300000 | 0.149137 | 0.029833 | 0 |
| chr13 | 93350001 | 93450000 | 516 | 658  | 93400000 | -0.15475 | 0.02619  | 0 |
| chr13 | 93650001 | 93750000 | 549 | 708  | 93700000 | -0.17098 | 0.016117 | 0 |
| chr13 | 94100001 | 94200000 | 617 | 779  | 94150000 | -0.14039 | 0.039097 | 0 |
| chr13 | 94350001 | 94450000 | 664 | 833  | 94400000 | -0.13117 | 0.049845 | 0 |
| chr13 | 94400001 | 94500000 | 647 | 832  | 94450000 | -0.16685 | 0.018295 | 0 |
| chr13 | 94450001 | 94550000 | 610 | 768  | 94500000 | -0.13633 | 0.043565 | 0 |
| chr13 | 94500001 | 94600000 | 603 | 778  | 94550000 | -0.17165 | 0.015786 | 0 |
| chr13 | 95550001 | 95650000 | 768 | 964  | 95600000 | -0.13196 | 0.048835 | 0 |
| chr13 | 97400001 | 97500000 | 718 | 933  | 97450000 | -0.18193 | 0.011388 | 0 |
| chr13 | 97450001 | 97550000 | 770 | 985  | 97500000 | -0.1593  | 0.022938 | 0 |
| chr13 | 97600001 | 97700000 | 817 | 1057 | 97650000 | -0.1756  | 0.013945 | 0 |

|       |          |          |      |      |          |          |          |   |
|-------|----------|----------|------|------|----------|----------|----------|---|
| chr13 | 98050001 | 98150000 | 828  | 1046 | 98100000 | -0.14122 | 0.038233 | 0 |
| chr13 | 98100001 | 98200000 | 792  | 1026 | 98150000 | -0.1775  | 0.013133 | 0 |
| chr13 | 98350001 | 98450000 | 651  | 828  | 98400000 | -0.15101 | 0.029149 | 0 |
| chr13 | 98600001 | 98700000 | 823  | 856  | 98650000 | 0.139245 | 0.039337 | 0 |
| chr13 | 99800001 | 99900000 | 838  | 877  | 99850000 | 0.130336 | 0.049883 | 0 |
| chr13 | 1E+08    | 1E+08    | 883  | 922  | 1E+08    | 0.13361  | 0.045772 | 0 |
| chr13 | 1.02E+08 | 1.02E+08 | 658  | 842  | 1.02E+08 | -0.15977 | 0.022625 | 0 |
| chr13 | 1.02E+08 | 1.02E+08 | 884  | 924  | 1.02E+08 | 0.132117 | 0.047612 | 0 |
| chr13 | 1.02E+08 | 1.02E+08 | 754  | 954  | 1.02E+08 | -0.14346 | 0.035969 | 0 |
| chr13 | 1.02E+08 | 1.03E+08 | 727  | 937  | 1.02E+08 | -0.17013 | 0.016547 | 0 |
| chr13 | 1.03E+08 | 1.03E+08 | 698  | 895  | 1.03E+08 | -0.1627  | 0.02074  | 0 |
| chr13 | 1.03E+08 | 1.03E+08 | 740  | 931  | 1.03E+08 | -0.13529 | 0.044777 | 0 |
| chr13 | 1.03E+08 | 1.04E+08 | 949  | 992  | 1.03E+08 | 0.132031 | 0.04772  | 0 |
| chr13 | 1.04E+08 | 1.04E+08 | 699  | 892  | 1.04E+08 | -0.15579 | 0.025418 | 0 |
| chr13 | 1.04E+08 | 1.04E+08 | 700  | 899  | 1.04E+08 | -0.165   | 0.019352 | 0 |
| chr13 | 1.04E+08 | 1.04E+08 | 606  | 768  | 1.04E+08 | -0.14583 | 0.033704 | 0 |
| chr13 | 1.04E+08 | 1.04E+08 | 620  | 778  | 1.04E+08 | -0.13154 | 0.049374 | 0 |
| chr13 | 1.04E+08 | 1.04E+08 | 611  | 772  | 1.04E+08 | -0.14147 | 0.037977 | 0 |
| chr13 | 1.04E+08 | 1.05E+08 | 641  | 807  | 1.05E+08 | -0.13628 | 0.043626 | 0 |
| chr13 | 1.05E+08 | 1.05E+08 | 545  | 695  | 1.05E+08 | -0.15479 | 0.02616  | 0 |
| chr13 | 1.05E+08 | 1.05E+08 | 602  | 775  | 1.05E+08 | -0.16847 | 0.017414 | 0 |
| chr13 | 1.05E+08 | 1.05E+08 | 627  | 798  | 1.05E+08 | -0.15196 | 0.028373 | 0 |
| chr13 | 1.05E+08 | 1.06E+08 | 578  | 742  | 1.06E+08 | -0.16439 | 0.019715 | 0 |
| chr13 | 1.06E+08 | 1.06E+08 | 560  | 706  | 1.06E+08 | -0.13828 | 0.041374 | 0 |
| chr13 | 1.06E+08 | 1.06E+08 | 647  | 839  | 1.06E+08 | -0.17894 | 0.01254  | 0 |
| chr13 | 1.06E+08 | 1.06E+08 | 564  | 710  | 1.06E+08 | -0.13616 | 0.043765 | 0 |
| chr13 | 1.06E+08 | 1.07E+08 | 593  | 764  | 1.06E+08 | -0.16958 | 0.016831 | 0 |
| chr13 | 1.07E+08 | 1.07E+08 | 673  | 846  | 1.07E+08 | -0.13409 | 0.046213 | 0 |
| chr13 | 1.07E+08 | 1.07E+08 | 757  | 966  | 1.07E+08 | -0.15577 | 0.025434 | 0 |
| chr13 | 1.08E+08 | 1.08E+08 | 652  | 836  | 1.08E+08 | -0.16267 | 0.020759 | 0 |
| chr13 | 1.09E+08 | 1.09E+08 | 647  | 827  | 1.09E+08 | -0.15816 | 0.023722 | 0 |
| chr13 | 1.11E+08 | 1.11E+08 | 1155 | 1193 | 1.11E+08 | 0.149262 | 0.029726 | 0 |
| chr13 | 1.11E+08 | 1.11E+08 | 1109 | 1142 | 1.11E+08 | 0.15366  | 0.026171 | 0 |
| chr13 | 1.11E+08 | 1.11E+08 | 873  | 889  | 1.11E+08 | 0.169761 | 0.016044 | 0 |
| chr13 | 1.12E+08 | 1.12E+08 | 933  | 957  | 1.12E+08 | 0.159321 | 0.022125 | 0 |
| chr13 | 1.12E+08 | 1.12E+08 | 1025 | 1064 | 1.12E+08 | 0.142089 | 0.036381 | 0 |
| chr13 | 1.12E+08 | 1.12E+08 | 545  | 563  | 1.12E+08 | 0.149084 | 0.029878 | 0 |
| chr13 | 1.13E+08 | 1.13E+08 | 959  | 988  | 1.13E+08 | 0.152983 | 0.026694 | 0 |
| chr13 | 1.13E+08 | 1.13E+08 | 965  | 988  | 1.13E+08 | 0.161981 | 0.020415 | 0 |
| chr13 | 1.14E+08 | 1.14E+08 | 1157 | 1193 | 1.14E+08 | 0.151758 | 0.027662 | 0 |
| chr13 | 1.14E+08 | 1.14E+08 | 1139 | 1150 | 1.14E+08 | 0.182097 | 0.01076  | 0 |
| chr13 | 1.14E+08 | 1.14E+08 | 1149 | 1187 | 1.14E+08 | 0.149022 | 0.029931 | 0 |
| chr13 | 1.14E+08 | 1.14E+08 | 970  | 1002 | 1.14E+08 | 0.149137 | 0.029833 | 0 |
| chr13 | 1.14E+08 | 1.14E+08 | 1042 | 1081 | 1.14E+08 | 0.142952 | 0.035521 | 0 |
| chr13 | 1.15E+08 | 1.15E+08 | 953  | 993  | 1.15E+08 | 0.136646 | 0.042207 | 0 |
| chr13 | 1.15E+08 | 1.15E+08 | 985  | 1001 | 1.15E+08 | 0.172717 | 0.014608 | 0 |
| chr13 | 1.15E+08 | 1.15E+08 | 538  | 549  | 1.15E+08 | 0.166763 | 0.017622 | 0 |

|       |          |          |     |     |          |          |           |   |
|-------|----------|----------|-----|-----|----------|----------|-----------|---|
| chr14 | 19100001 | 19200000 | 29  | 42  | 19150000 | -0.33837 | 1.42E-05  | 0 |
| chr14 | 19150001 | 19250000 | 4   | 9   | 19200000 | -0.97396 | 1.25E-28  | 0 |
| chr14 | 19200001 | 19300000 | 23  | 32  | 19250000 | -0.28048 | 0.000244  | 0 |
| chr14 | 19350001 | 19450000 | 16  | 27  | 19400000 | -0.55892 | 7.19E-12  | 0 |
| chr14 | 19400001 | 19500000 | 30  | 51  | 19450000 | -0.56957 | 3.13E-12  | 0 |
| chr14 | 19450001 | 19550000 | 20  | 28  | 19500000 | -0.28946 | 0.000161  | 0 |
| chr14 | 19500001 | 19600000 | 7   | 3   | 19550000 | 1.418355 | 2.22E-54  | 0 |
| chr14 | 19550001 | 19650000 | 8   | 7   | 19600000 | 0.388608 | 5.52E-07  | 0 |
| chr14 | 19600001 | 19700000 | 10  | 9   | 19650000 | 0.347966 | 6.17E-06  | 0 |
| chr14 | 19700001 | 19800000 | 33  | 56  | 19750000 | -0.567   | 3.84E-12  | 0 |
| chr14 | 19750001 | 19850000 | 39  | 65  | 19800000 | -0.541   | 2.84E-11  | 0 |
| chr14 | 19800001 | 19900000 | 11  | 17  | 19850000 | -0.43207 | 5.86E-08  | 0 |
| chr14 | 19900001 | 20000000 | 0   | 1   | 19950000 | #NAME?   | 3.67E-137 | 0 |
| chr14 | 19950001 | 20050000 | 5   | 5   | 2.00E+07 | 0.195963 | 0.006694  | 0 |
| chr14 | 20000001 | 20100000 | 6   | 8   | 20050000 | -0.21907 | 0.003112  | 0 |
| chr14 | 20050001 | 20150000 | 6   | 8   | 20100000 | -0.21907 | 0.003112  | 0 |
| chr14 | 20400001 | 20500000 | 322 | 452 | 20450000 | -0.2933  | 0.000135  | 0 |
| chr14 | 20450001 | 20550000 | 392 | 562 | 20500000 | -0.32375 | 3.02E-05  | 0 |
| chr14 | 20850001 | 20950000 | 660 | 664 | 20900000 | 0.187246 | 0.00905   | 0 |
| chr14 | 21100001 | 21200000 | 629 | 628 | 21150000 | 0.198258 | 0.006172  | 0 |
| chr14 | 21650001 | 21750000 | 590 | 568 | 21700000 | 0.250787 | 0.000785  | 0 |
| chr14 | 21900001 | 22000000 | 617 | 604 | 21950000 | 0.226685 | 0.002122  | 0 |
| chr14 | 23350001 | 23450000 | 652 | 633 | 23400000 | 0.23863  | 0.00131   | 0 |
| chr14 | 23400001 | 23500000 | 652 | 611 | 23450000 | 0.289663 | 0.000132  | 0 |
| chr14 | 23450001 | 23550000 | 753 | 704 | 23500000 | 0.293037 | 0.000112  | 0 |
| chr14 | 23500001 | 23600000 | 776 | 753 | 23550000 | 0.23937  | 0.00127   | 0 |
| chr14 | 23550001 | 23650000 | 697 | 693 | 23600000 | 0.204266 | 0.004973  | 0 |
| chr14 | 24400001 | 24500000 | 208 | 203 | 24450000 | 0.231067 | 0.001782  | 0 |
| chr14 | 24450001 | 24550000 | 428 | 430 | 24500000 | 0.189237 | 0.008455  | 0 |
| chr14 | 24500001 | 24600000 | 737 | 727 | 24550000 | 0.215672 | 0.003253  | 0 |
| chr14 | 24550001 | 24650000 | 780 | 715 | 24600000 | 0.321494 | 2.63E-05  | 0 |
| chr14 | 24600001 | 24700000 | 716 | 641 | 24650000 | 0.355598 | 3.99E-06  | 0 |
| chr14 | 24650001 | 24750000 | 738 | 703 | 24700000 | 0.266059 | 0.0004    | 0 |
| chr14 | 25600001 | 25700000 | 356 | 466 | 25650000 | -0.19249 | 0.008024  | 0 |
| chr14 | 25650001 | 25750000 | 344 | 471 | 25700000 | -0.25736 | 0.000675  | 0 |
| chr14 | 25700001 | 25800000 | 368 | 490 | 25750000 | -0.21711 | 0.003348  | 0 |
| chr14 | 26000001 | 26100000 | 376 | 491 | 26050000 | -0.18903 | 0.009015  | 0 |
| chr14 | 26050001 | 26150000 | 390 | 518 | 26100000 | -0.21351 | 0.003823  | 0 |
| chr14 | 26500001 | 26600000 | 417 | 553 | 26550000 | -0.21127 | 0.00415   | 0 |
| chr14 | 26700001 | 26800000 | 326 | 457 | 26750000 | -0.29136 | 0.000148  | 0 |
| chr14 | 26900001 | 27000000 | 357 | 489 | 26950000 | -0.25795 | 0.000658  | 0 |
| chr14 | 27150001 | 27250000 | 378 | 501 | 27200000 | -0.21046 | 0.004274  | 0 |
| chr14 | 27300001 | 27400000 | 381 | 539 | 27350000 | -0.30453 | 7.88E-05  | 0 |
| chr14 | 27900001 | 28000000 | 370 | 493 | 27950000 | -0.2181  | 0.003227  | 0 |
| chr14 | 27950001 | 28050000 | 371 | 485 | 2.80E+07 | -0.1906  | 0.008551  | 0 |
| chr14 | 28050001 | 28150000 | 366 | 480 | 28100000 | -0.19523 | 0.00731   | 0 |
| chr14 | 28200001 | 28300000 | 127 | 201 | 28250000 | -0.4664  | 6.07E-09  | 0 |



|       |          |          |     |     |          |          |          |   |
|-------|----------|----------|-----|-----|----------|----------|----------|---|
| chr14 | 28500001 | 28600000 | 386 | 507 | 28550000 | -0.19742 | 0.006779 | 0 |
| chr14 | 28550001 | 28650000 | 345 | 462 | 28600000 | -0.22533 | 0.002456 | 0 |
| chr14 | 28900001 | 29000000 | 456 | 605 | 28950000 | -0.21194 | 0.00405  | 0 |
| chr14 | 29100001 | 29200000 | 398 | 548 | 29150000 | -0.26544 | 0.000477 | 0 |
| chr14 | 29150001 | 29250000 | 417 | 570 | 29200000 | -0.25495 | 0.000747 | 0 |
| chr14 | 29300001 | 29400000 | 394 | 519 | 29350000 | -0.20158 | 0.005867 | 0 |
| chr14 | 29350001 | 29450000 | 385 | 514 | 29400000 | -0.22095 | 0.002901 | 0 |
| chr14 | 29950001 | 30050000 | 399 | 529 | 3.00E+07 | -0.21092 | 0.004204 | 0 |
| chr14 | 30500001 | 30600000 | 394 | 524 | 30550000 | -0.21541 | 0.003566 | 0 |
| chr14 | 30600001 | 30700000 | 425 | 571 | 30650000 | -0.23006 | 0.002047 | 0 |
| chr14 | 30750001 | 30850000 | 439 | 579 | 30800000 | -0.20338 | 0.005506 | 0 |
| chr14 | 31900001 | 32000000 | 577 | 576 | 31950000 | 0.198466 | 0.006127 | 0 |
| chr14 | 31950001 | 32050000 | 605 | 581 | 3.20E+07 | 0.25436  | 0.000672 | 0 |
| chr14 | 32000001 | 32100000 | 543 | 543 | 32050000 | 0.195963 | 0.006694 | 0 |
| chr14 | 32650001 | 32750000 | 523 | 522 | 32700000 | 0.198724 | 0.00607  | 0 |
| chr14 | 33250001 | 33350000 | 417 | 545 | 33300000 | -0.19025 | 0.008654 | 0 |
| chr14 | 33300001 | 33400000 | 465 | 606 | 33350000 | -0.18612 | 0.009927 | 0 |
| chr14 | 34600001 | 34700000 | 519 | 678 | 34650000 | -0.18959 | 0.008847 | 0 |
| chr14 | 35000001 | 35100000 | 440 | 443 | 35050000 | 0.18616  | 0.009389 | 0 |
| chr14 | 35250001 | 35350000 | 586 | 579 | 35300000 | 0.2133   | 0.003559 | 0 |
| chr14 | 35450001 | 35550000 | 558 | 542 | 35500000 | 0.237935 | 0.001348 | 0 |
| chr14 | 35500001 | 35600000 | 545 | 533 | 35550000 | 0.228084 | 0.002008 | 0 |
| chr14 | 36050001 | 36150000 | 561 | 565 | 36100000 | 0.185713 | 0.009532 | 0 |
| chr14 | 38600001 | 38700000 | 453 | 592 | 38650000 | -0.19012 | 0.00869  | 0 |
| chr14 | 39350001 | 39450000 | 393 | 533 | 39400000 | -0.24364 | 0.001193 | 0 |
| chr14 | 40250001 | 40350000 | 431 | 591 | 40300000 | -0.25951 | 0.000616 | 0 |
| chr14 | 40300001 | 40400000 | 396 | 554 | 40350000 | -0.28842 | 0.000169 | 0 |
| chr14 | 40350001 | 40450000 | 348 | 493 | 40400000 | -0.30654 | 7.14E-05 | 0 |
| chr14 | 40400001 | 40500000 | 373 | 500 | 40450000 | -0.22679 | 0.002323 | 0 |
| chr14 | 41350001 | 41450000 | 326 | 467 | 41400000 | -0.32259 | 3.21E-05 | 0 |
| chr14 | 41400001 | 41500000 | 348 | 468 | 41450000 | -0.23146 | 0.001939 | 0 |
| chr14 | 41800001 | 41900000 | 362 | 488 | 41850000 | -0.23493 | 0.001692 | 0 |
| chr14 | 42200001 | 42300000 | 361 | 476 | 42250000 | -0.203   | 0.00558  | 0 |
| chr14 | 42700001 | 42800000 | 319 | 421 | 42750000 | -0.2043  | 0.005329 | 0 |
| chr14 | 42750001 | 42850000 | 343 | 463 | 42800000 | -0.23684 | 0.001568 | 0 |
| chr14 | 42900001 | 43000000 | 363 | 479 | 42950000 | -0.20409 | 0.005369 | 0 |
| chr14 | 42950001 | 43050000 | 373 | 494 | 4.30E+07 | -0.20937 | 0.004445 | 0 |
| chr14 | 43300001 | 43400000 | 327 | 463 | 43350000 | -0.30576 | 7.42E-05 | 0 |
| chr14 | 43350001 | 43450000 | 331 | 450 | 43400000 | -0.24713 | 0.001035 | 0 |
| chr14 | 43800001 | 43900000 | 311 | 432 | 43850000 | -0.27815 | 0.000271 | 0 |
| chr14 | 43850001 | 43950000 | 359 | 486 | 43900000 | -0.24101 | 0.001327 | 0 |
| chr14 | 43900001 | 44000000 | 344 | 462 | 43950000 | -0.22952 | 0.00209  | 0 |
| chr14 | 43950001 | 44050000 | 315 | 463 | 4.40E+07 | -0.3597  | 4.46E-06 | 0 |
| chr14 | 44000001 | 44100000 | 338 | 461 | 44050000 | -0.25178 | 0.000853 | 0 |
| chr14 | 44050001 | 44150000 | 367 | 489 | 44100000 | -0.21809 | 0.003228 | 0 |
| chr14 | 44100001 | 44200000 | 378 | 519 | 44150000 | -0.26139 | 0.000568 | 0 |
| chr14 | 44150001 | 44250000 | 381 | 506 | 44200000 | -0.21338 | 0.003842 | 0 |

|       |          |          |      |      |          |          |          |   |
|-------|----------|----------|------|------|----------|----------|----------|---|
| chr14 | 44350001 | 44450000 | 403  | 530  | 44400000 | -0.19925 | 0.006363 | 0 |
| chr14 | 44400001 | 44500000 | 365  | 496  | 44450000 | -0.24648 | 0.001063 | 0 |
| chr14 | 44700001 | 44800000 | 374  | 493  | 44750000 | -0.20259 | 0.005662 | 0 |
| chr14 | 46000001 | 46100000 | 368  | 491  | 46050000 | -0.22005 | 0.003    | 0 |
| chr14 | 46300001 | 46400000 | 448  | 446  | 46350000 | 0.202418 | 0.005317 | 0 |
| chr14 | 46650001 | 46750000 | 370  | 490  | 46700000 | -0.20929 | 0.004458 | 0 |
| chr14 | 47150001 | 47250000 | 372  | 505  | 47200000 | -0.24502 | 0.001128 | 0 |
| chr14 | 47250001 | 47350000 | 357  | 480  | 47300000 | -0.23115 | 0.001962 | 0 |
| chr14 | 47650001 | 47750000 | 386  | 543  | 47700000 | -0.29639 | 0.000117 | 0 |
| chr14 | 47700001 | 47800000 | 394  | 537  | 47750000 | -0.25076 | 0.00089  | 0 |
| chr14 | 47900001 | 48000000 | 423  | 554  | 47950000 | -0.19327 | 0.007816 | 0 |
| chr14 | 48050001 | 48150000 | 416  | 544  | 48100000 | -0.19106 | 0.008421 | 0 |
| chr14 | 49200001 | 49300000 | 379  | 519  | 49250000 | -0.25757 | 0.000669 | 0 |
| chr14 | 49250001 | 49350000 | 385  | 513  | 49300000 | -0.21814 | 0.003223 | 0 |
| chr14 | 49300001 | 49400000 | 398  | 538  | 49350000 | -0.23887 | 0.001446 | 0 |
| chr14 | 50050001 | 50150000 | 598  | 600  | 50100000 | 0.191146 | 0.007918 | 0 |
| chr14 | 50250001 | 50350000 | 573  | 562  | 50300000 | 0.223928 | 0.002366 | 0 |
| chr14 | 50400001 | 50500000 | 672  | 670  | 50450000 | 0.200263 | 0.005746 | 0 |
| chr14 | 51200001 | 51300000 | 634  | 605  | 51250000 | 0.263511 | 0.000449 | 0 |
| chr14 | 51250001 | 51350000 | 667  | 638  | 51300000 | 0.260093 | 0.000523 | 0 |
| chr14 | 51800001 | 51900000 | 478  | 624  | 51850000 | -0.18857 | 0.009153 | 0 |
| chr14 | 52400001 | 52500000 | 712  | 705  | 52450000 | 0.210217 | 0.003994 | 0 |
| chr14 | 52450001 | 52550000 | 713  | 713  | 52500000 | 0.195963 | 0.006694 | 0 |
| chr14 | 53150001 | 53250000 | 645  | 598  | 53200000 | 0.305117 | 6.16E-05 | 0 |
| chr14 | 53200001 | 53300000 | 621  | 610  | 53250000 | 0.221747 | 0.002576 | 0 |
| chr14 | 54650001 | 54750000 | 487  | 640  | 54700000 | -0.19819 | 0.006602 | 0 |
| chr14 | 55350001 | 55450000 | 580  | 571  | 55400000 | 0.218525 | 0.002917 | 0 |
| chr14 | 55450001 | 55550000 | 592  | 596  | 55500000 | 0.186248 | 0.009361 | 0 |
| chr14 | 55650001 | 55750000 | 620  | 614  | 55700000 | 0.209993 | 0.004028 | 0 |
| chr14 | 55700001 | 55800000 | 645  | 624  | 55750000 | 0.243716 | 0.00106  | 0 |
| chr14 | 57750001 | 57850000 | 473  | 450  | 57800000 | 0.267878 | 0.000369 | 0 |
| chr14 | 58700001 | 58800000 | 582  | 585  | 58750000 | 0.188546 | 0.008658 | 0 |
| chr14 | 59900001 | 60000000 | 572  | 575  | 59950000 | 0.188416 | 0.008696 | 0 |
| chr14 | 59950001 | 60050000 | 495  | 498  | 6.00E+07 | 0.187246 | 0.00905  | 0 |
| chr14 | 60050001 | 60150000 | 430  | 565  | 60100000 | -0.19795 | 0.006656 | 0 |
| chr14 | 61300001 | 61400000 | 452  | 604  | 61350000 | -0.22226 | 0.00276  | 0 |
| chr14 | 62100001 | 62200000 | 676  | 677  | 62150000 | 0.19383  | 0.007213 | 0 |
| chr14 | 62150001 | 62250000 | 656  | 617  | 62200000 | 0.284388 | 0.000171 | 0 |
| chr14 | 62400001 | 62500000 | 540  | 710  | 62450000 | -0.1989  | 0.006442 | 0 |
| chr14 | 62450001 | 62550000 | 509  | 682  | 62500000 | -0.22614 | 0.002381 | 0 |
| chr14 | 62700001 | 62800000 | 453  | 598  | 62750000 | -0.20467 | 0.00526  | 0 |
| chr14 | 63000001 | 63100000 | 421  | 571  | 63050000 | -0.24371 | 0.00119  | 0 |
| chr14 | 65600001 | 65700000 | 575  | 578  | 65650000 | 0.188455 | 0.008685 | 0 |
| chr14 | 67450001 | 67550000 | 454  | 603  | 67500000 | -0.2135  | 0.003825 | 0 |
| chr14 | 69250001 | 69350000 | 1078 | 1083 | 69300000 | 0.189287 | 0.008441 | 0 |
| chr14 | 69850001 | 69950000 | 880  | 843  | 69900000 | 0.257934 | 0.000575 | 0 |
| chr14 | 69900001 | 70000000 | 965  | 927  | 69950000 | 0.253923 | 0.000685 | 0 |

|       |          |          |      |      |          |          |          |   |
|-------|----------|----------|------|------|----------|----------|----------|---|
| chr14 | 70350001 | 70450000 | 1093 | 1075 | 70400000 | 0.21992  | 0.002765 | 0 |
| chr14 | 70400001 | 70500000 | 1140 | 1126 | 70450000 | 0.21379  | 0.003494 | 0 |
| chr14 | 71000001 | 71100000 | 849  | 838  | 71050000 | 0.214777 | 0.003366 | 0 |
| chr14 | 73300001 | 73400000 | 1042 | 962  | 73350000 | 0.31121  | 4.51E-05 | 0 |
| chr14 | 73350001 | 73450000 | 1067 | 978  | 73400000 | 0.321617 | 2.62E-05 | 0 |
| chr14 | 73500001 | 73600000 | 828  | 831  | 73550000 | 0.190745 | 0.008028 | 0 |
| chr14 | 74100001 | 74200000 | 926  | 907  | 74150000 | 0.225873 | 0.002191 | 0 |
| chr14 | 74150001 | 74250000 | 1040 | 1028 | 74200000 | 0.212706 | 0.003639 | 0 |
| chr14 | 74300001 | 74400000 | 976  | 972  | 74350000 | 0.201888 | 0.00542  | 0 |
| chr14 | 74500001 | 74600000 | 821  | 817  | 74550000 | 0.203009 | 0.005205 | 0 |
| chr14 | 75450001 | 75550000 | 1011 | 1016 | 75500000 | 0.188846 | 0.00857  | 0 |
| chr14 | 75500001 | 75600000 | 1042 | 1013 | 75550000 | 0.236684 | 0.001419 | 0 |
| chr14 | 75550001 | 75650000 | 966  | 951  | 75600000 | 0.218541 | 0.002916 | 0 |
| chr14 | 83100001 | 83200000 | 590  | 787  | 83150000 | -0.21969 | 0.003042 | 0 |
| chr14 | 83150001 | 83250000 | 610  | 816  | 83200000 | -0.2238  | 0.002604 | 0 |
| chr14 | 83400001 | 83500000 | 598  | 788  | 83450000 | -0.20209 | 0.005762 | 0 |
| chr14 | 83450001 | 83550000 | 581  | 805  | 83500000 | -0.27449 | 0.00032  | 0 |
| chr14 | 83600001 | 83700000 | 579  | 792  | 83650000 | -0.25597 | 0.000716 | 0 |
| chr14 | 83650001 | 83750000 | 594  | 825  | 83700000 | -0.27797 | 0.000274 | 0 |
| chr14 | 83850001 | 83950000 | 580  | 770  | 83900000 | -0.21284 | 0.003919 | 0 |
| chr14 | 83900001 | 84000000 | 587  | 783  | 83950000 | -0.21969 | 0.003041 | 0 |
| chr14 | 84100001 | 84200000 | 541  | 709  | 84150000 | -0.19419 | 0.007573 | 0 |
| chr14 | 84150001 | 84250000 | 575  | 782  | 84200000 | -0.24764 | 0.001013 | 0 |
| chr14 | 84450001 | 84550000 | 594  | 776  | 84500000 | -0.18963 | 0.008835 | 0 |
| chr14 | 84600001 | 84700000 | 619  | 812  | 84650000 | -0.19558 | 0.007223 | 0 |
| chr14 | 84650001 | 84750000 | 558  | 766  | 84700000 | -0.26112 | 0.000575 | 0 |
| chr14 | 84850001 | 84950000 | 570  | 774  | 84900000 | -0.24541 | 0.00111  | 0 |
| chr14 | 86450001 | 86550000 | 580  | 781  | 86500000 | -0.23331 | 0.001803 | 0 |
| chr14 | 87100001 | 87200000 | 673  | 877  | 87150000 | -0.18601 | 0.009965 | 0 |
| chr14 | 87700001 | 87800000 | 586  | 785  | 87750000 | -0.22583 | 0.00241  | 0 |
| chr14 | 87750001 | 87850000 | 613  | 808  | 87800000 | -0.20251 | 0.005678 | 0 |
| chr14 | 87950001 | 88050000 | 627  | 824  | 8.80E+07 | -0.19822 | 0.006595 | 0 |
| chr14 | 88950001 | 89050000 | 882  | 850  | 8.90E+07 | 0.249279 | 0.000837 | 0 |
| chr14 | 89400001 | 89500000 | 967  | 971  | 89450000 | 0.190008 | 0.008235 | 0 |
| chr14 | 90150001 | 90250000 | 716  | 984  | 90200000 | -0.26274 | 0.000536 | 0 |
| chr14 | 90200001 | 90300000 | 725  | 1011 | 90250000 | -0.28377 | 0.00021  | 0 |
| chr14 | 94200001 | 94300000 | 1052 | 1039 | 94250000 | 0.213902 | 0.003479 | 0 |
| chr14 | 94550001 | 94650000 | 991  | 983  | 94600000 | 0.207657 | 0.004392 | 0 |
| chr14 | 97450001 | 97550000 | 760  | 1015 | 97500000 | -0.22145 | 0.002847 | 0 |
| chr14 | 97500001 | 97600000 | 718  | 998  | 97550000 | -0.27909 | 0.00026  | 0 |
| chr14 | 1E+08    | 1E+08    | 1271 | 1212 | 1E+08    | 0.264537 | 0.000429 | 0 |
| chr14 | 1E+08    | 1E+08    | 1184 | 1191 | 1E+08    | 0.187459 | 0.008985 | 0 |
| chr14 | 1.01E+08 | 1.01E+08 | 1107 | 1063 | 1.01E+08 | 0.254477 | 0.000669 | 0 |
| chr14 | 1.01E+08 | 1.01E+08 | 1120 | 1035 | 1.01E+08 | 0.309831 | 4.84E-05 | 0 |
| chr14 | 1.01E+08 | 1.01E+08 | 1117 | 1068 | 1.01E+08 | 0.260681 | 0.000509 | 0 |
| chr14 | 1.01E+08 | 1.01E+08 | 1199 | 1166 | 1.01E+08 | 0.236227 | 0.001445 | 0 |
| chr14 | 1.02E+08 | 1.02E+08 | 1137 | 1144 | 1.02E+08 | 0.187108 | 0.009092 | 0 |

|       |          |          |      |      |          |          |          |   |
|-------|----------|----------|------|------|----------|----------|----------|---|
| chr14 | 1.02E+08 | 1.03E+08 | 1030 | 978  | 1.02E+08 | 0.270701 | 0.000324 | 0 |
| chr14 | 1.02E+08 | 1.03E+08 | 984  | 956  | 1.03E+08 | 0.237611 | 0.001366 | 0 |
| chr14 | 1.03E+08 | 1.03E+08 | 926  | 924  | 1.03E+08 | 0.199082 | 0.005993 | 0 |
| chr14 | 1.03E+08 | 1.03E+08 | 1046 | 985  | 1.03E+08 | 0.28265  | 0.000186 | 0 |
| chr14 | 1.03E+08 | 1.03E+08 | 1053 | 960  | 1.03E+08 | 0.329362 | 1.73E-05 | 0 |
| chr14 | 1.03E+08 | 1.03E+08 | 978  | 903  | 1.03E+08 | 0.311072 | 4.54E-05 | 0 |
| chr14 | 1.03E+08 | 1.03E+08 | 1014 | 1012 | 1.03E+08 | 0.198811 | 0.006052 | 0 |
| chr14 | 1.03E+08 | 1.04E+08 | 1013 | 992  | 1.04E+08 | 0.226185 | 0.002165 | 0 |
| chr14 | 1.04E+08 | 1.04E+08 | 1149 | 1066 | 1.04E+08 | 0.304134 | 6.47E-05 | 0 |
| chr14 | 1.04E+08 | 1.04E+08 | 1146 | 1128 | 1.04E+08 | 0.218803 | 0.002886 | 0 |
| chr14 | 1.04E+08 | 1.04E+08 | 950  | 957  | 1.04E+08 | 0.185372 | 0.009643 | 0 |
| chr14 | 1.04E+08 | 1.04E+08 | 944  | 927  | 1.04E+08 | 0.222181 | 0.002533 | 0 |
| chr14 | 1.04E+08 | 1.04E+08 | 987  | 956  | 1.04E+08 | 0.242003 | 0.001138 | 0 |
| chr14 | 1.04E+08 | 1.04E+08 | 943  | 933  | 1.04E+08 | 0.211344 | 0.00383  | 0 |
| chr14 | 1.04E+08 | 1.04E+08 | 1128 | 1047 | 1.04E+08 | 0.303469 | 6.69E-05 | 0 |
| chr14 | 1.04E+08 | 1.04E+08 | 986  | 926  | 1.04E+08 | 0.286538 | 0.000154 | 0 |
| chr14 | 1.04E+08 | 1.04E+08 | 855  | 858  | 1.04E+08 | 0.19091  | 0.007983 | 0 |
| chr14 | 1.05E+08 | 1.05E+08 | 1149 | 1156 | 1.05E+08 | 0.1872   | 0.009064 | 0 |
| chr14 | 1.05E+08 | 1.05E+08 | 1362 | 1296 | 1.05E+08 | 0.267624 | 0.000373 | 0 |
| chr14 | 1.05E+08 | 1.05E+08 | 1359 | 1271 | 1.05E+08 | 0.292544 | 0.000115 | 0 |
| chr14 | 1.05E+08 | 1.05E+08 | 1167 | 1173 | 1.05E+08 | 0.188565 | 0.008652 | 0 |
| chr14 | 1.05E+08 | 1.05E+08 | 1205 | 1178 | 1.05E+08 | 0.228657 | 0.001962 | 0 |
| chr14 | 1.05E+08 | 1.05E+08 | 1336 | 1262 | 1.05E+08 | 0.278171 | 0.000229 | 0 |
| chr14 | 1.05E+08 | 1.05E+08 | 1410 | 1358 | 1.05E+08 | 0.250175 | 0.000806 | 0 |
| chr14 | 1.05E+08 | 1.05E+08 | 1279 | 1189 | 1.05E+08 | 0.301231 | 7.49E-05 | 0 |
| chr14 | 1.05E+08 | 1.06E+08 | 1083 | 988  | 1.05E+08 | 0.328413 | 1.82E-05 | 0 |
| chr14 | 1.05E+08 | 1.06E+08 | 1094 | 1040 | 1.06E+08 | 0.268992 | 0.00035  | 0 |
| chr14 | 1.06E+08 | 1.06E+08 | 1242 | 1230 | 1.06E+08 | 0.20997  | 0.004031 | 0 |
| chr14 | 1.06E+08 | 1.06E+08 | 1040 | 972  | 1.06E+08 | 0.293518 | 0.00011  | 0 |
| chr14 | 1.06E+08 | 1.06E+08 | 981  | 956  | 1.06E+08 | 0.233206 | 0.001635 | 0 |
| chr14 | 1.06E+08 | 1.06E+08 | 1218 | 1159 | 1.06E+08 | 0.267597 | 0.000373 | 0 |
| chr14 | 1.06E+08 | 1.06E+08 | 1292 | 1197 | 1.06E+08 | 0.306146 | 5.84E-05 | 0 |
| chr14 | 1.06E+08 | 1.06E+08 | 1201 | 1084 | 1.06E+08 | 0.343834 | 7.79E-06 | 0 |
| chr14 | 1.06E+08 | 1.06E+08 | 913  | 817  | 1.06E+08 | 0.356242 | 3.85E-06 | 0 |
| chr14 | 1.06E+08 | 1.06E+08 | 500  | 494  | 1.06E+08 | 0.21338  | 0.003548 | 0 |
| chr14 | 1.07E+08 | 1.07E+08 | 352  | 327  | 1.07E+08 | 0.302248 | 7.12E-05 | 0 |
| chr14 | 1.07E+08 | 1.07E+08 | 493  | 484  | 1.07E+08 | 0.222544 | 0.002497 | 0 |
| chr14 | 20200001 | 20300000 | 202  | 261  | 20250000 | -0.17373 | 0.014793 | 0 |
| chr14 | 20250001 | 20350000 | 252  | 322  | 20300000 | -0.15767 | 0.024061 | 0 |
| chr14 | 20500001 | 20600000 | 377  | 489  | 20550000 | -0.17931 | 0.012394 | 0 |
| chr14 | 20900001 | 21000000 | 640  | 654  | 20950000 | 0.164744 | 0.018759 | 0 |
| chr14 | 21050001 | 21150000 | 681  | 701  | 21100000 | 0.154203 | 0.025757 | 0 |
| chr14 | 21350001 | 21450000 | 407  | 422  | 21400000 | 0.143749 | 0.034741 | 0 |
| chr14 | 21400001 | 21500000 | 582  | 598  | 21450000 | 0.156837 | 0.023831 | 0 |
| chr14 | 21500001 | 21600000 | 708  | 720  | 21550000 | 0.171715 | 0.015081 | 0 |
| chr14 | 22300001 | 22400000 | 479  | 603  | 22350000 | -0.13617 | 0.043755 | 0 |
| chr14 | 22750001 | 22850000 | 470  | 600  | 22800000 | -0.15634 | 0.025015 | 0 |

|       |          |          |     |     |          |          |          |   |
|-------|----------|----------|-----|-----|----------|----------|----------|---|
| chr14 | 22850001 | 22950000 | 597 | 753 | 22900000 | -0.13896 | 0.040632 | 0 |
| chr14 | 23050001 | 23150000 | 543 | 561 | 23100000 | 0.148914 | 0.030023 | 0 |
| chr14 | 24300001 | 24400000 | 573 | 589 | 24350000 | 0.156231 | 0.024263 | 0 |
| chr14 | 24350001 | 24450000 | 416 | 429 | 24400000 | 0.151569 | 0.027814 | 0 |
| chr14 | 24700001 | 24800000 | 782 | 804 | 24750000 | 0.155936 | 0.024475 | 0 |
| chr14 | 24850001 | 24950000 | 682 | 692 | 24900000 | 0.174963 | 0.013592 | 0 |
| chr14 | 26250001 | 26350000 | 394 | 496 | 26300000 | -0.13618 | 0.043741 | 0 |
| chr14 | 26300001 | 26400000 | 420 | 541 | 26350000 | -0.16928 | 0.016988 | 0 |
| chr14 | 26350001 | 26450000 | 418 | 540 | 26400000 | -0.17349 | 0.014903 | 0 |
| chr14 | 26450001 | 26550000 | 445 | 563 | 26500000 | -0.14337 | 0.036062 | 0 |
| chr14 | 26550001 | 26650000 | 409 | 514 | 26600000 | -0.1337  | 0.046678 | 0 |
| chr14 | 26650001 | 26750000 | 391 | 493 | 26700000 | -0.13846 | 0.041179 | 0 |
| chr14 | 26750001 | 26850000 | 385 | 488 | 26800000 | -0.14606 | 0.033487 | 0 |
| chr14 | 26850001 | 26950000 | 400 | 520 | 26900000 | -0.18255 | 0.011161 | 0 |
| chr14 | 27050001 | 27150000 | 349 | 443 | 27100000 | -0.14812 | 0.031623 | 0 |
| chr14 | 27100001 | 27200000 | 342 | 437 | 27150000 | -0.15767 | 0.024061 | 0 |
| chr14 | 27350001 | 27450000 | 380 | 489 | 27400000 | -0.16787 | 0.017736 | 0 |
| chr14 | 27400001 | 27500000 | 399 | 507 | 27450000 | -0.14963 | 0.030305 | 0 |
| chr14 | 27450001 | 27550000 | 396 | 499 | 27500000 | -0.13758 | 0.042155 | 0 |
| chr14 | 27550001 | 27650000 | 362 | 468 | 27600000 | -0.17456 | 0.014414 | 0 |
| chr14 | 27600001 | 27700000 | 368 | 475 | 27650000 | -0.17226 | 0.01549  | 0 |
| chr14 | 29250001 | 29350000 | 427 | 536 | 29300000 | -0.13203 | 0.048747 | 0 |
| chr14 | 29400001 | 29500000 | 340 | 440 | 29450000 | -0.17601 | 0.013769 | 0 |
| chr14 | 29450001 | 29550000 | 375 | 482 | 29500000 | -0.16618 | 0.018675 | 0 |
| chr14 | 29900001 | 30000000 | 401 | 506 | 29950000 | -0.13957 | 0.039967 | 0 |
| chr14 | 30250001 | 30350000 | 424 | 532 | 30300000 | -0.1314  | 0.049552 | 0 |
| chr14 | 30550001 | 30650000 | 410 | 518 | 30600000 | -0.14137 | 0.038081 | 0 |
| chr14 | 30800001 | 30900000 | 443 | 562 | 30850000 | -0.1473  | 0.032352 | 0 |
| chr14 | 30950001 | 31050000 | 575 | 591 | 3.10E+07 | 0.156367 | 0.024165 | 0 |
| chr14 | 31000001 | 31100000 | 561 | 580 | 31050000 | 0.147911 | 0.030896 | 0 |
| chr14 | 31200001 | 31300000 | 526 | 675 | 31250000 | -0.16386 | 0.020029 | 0 |
| chr14 | 31400001 | 31500000 | 553 | 577 | 31450000 | 0.134671 | 0.044499 | 0 |
| chr14 | 32050001 | 32150000 | 446 | 466 | 32100000 | 0.132677 | 0.046915 | 0 |
| chr14 | 32100001 | 32200000 | 480 | 487 | 32150000 | 0.175076 | 0.013542 | 0 |
| chr14 | 32600001 | 32700000 | 556 | 581 | 32650000 | 0.13251  | 0.047122 | 0 |
| chr14 | 33000001 | 33100000 | 499 | 641 | 33050000 | -0.16532 | 0.019167 | 0 |
| chr14 | 33050001 | 33150000 | 497 | 625 | 33100000 | -0.13465 | 0.045542 | 0 |
| chr14 | 33500001 | 33600000 | 489 | 507 | 33550000 | 0.143812 | 0.03468  | 0 |
| chr14 | 33550001 | 33650000 | 503 | 523 | 33600000 | 0.13971  | 0.03884  | 0 |
| chr14 | 33650001 | 33750000 | 496 | 631 | 33700000 | -0.15134 | 0.02888  | 0 |
| chr14 | 33750001 | 33850000 | 502 | 633 | 33800000 | -0.13856 | 0.04107  | 0 |
| chr14 | 34250001 | 34350000 | 507 | 654 | 34300000 | -0.17134 | 0.015938 | 0 |
| chr14 | 34400001 | 34500000 | 591 | 616 | 34450000 | 0.136191 | 0.042726 | 0 |
| chr14 | 34950001 | 35050000 | 423 | 433 | 3.50E+07 | 0.162254 | 0.020246 | 0 |
| chr14 | 35050001 | 35150000 | 472 | 492 | 35100000 | 0.136092 | 0.04284  | 0 |
| chr14 | 35400001 | 35500000 | 571 | 583 | 35450000 | 0.165958 | 0.018068 | 0 |
| chr14 | 35750001 | 35850000 | 611 | 628 | 35800000 | 0.156371 | 0.024162 | 0 |

|       |          |          |     |     |          |          |          |   |
|-------|----------|----------|-----|-----|----------|----------|----------|---|
| chr14 | 35800001 | 35900000 | 617 | 631 | 35850000 | 0.163594 | 0.019434 | 0 |
| chr14 | 38700001 | 38800000 | 465 | 589 | 38750000 | -0.14507 | 0.034411 | 0 |
| chr14 | 38850001 | 38950000 | 445 | 570 | 38900000 | -0.16119 | 0.021691 | 0 |
| chr14 | 39950001 | 40050000 | 404 | 525 | 4.00E+07 | -0.182   | 0.011362 | 0 |
| chr14 | 40000001 | 40100000 | 435 | 556 | 40050000 | -0.15811 | 0.023758 | 0 |
| chr14 | 40150001 | 40250000 | 461 | 590 | 40200000 | -0.15999 | 0.022481 | 0 |
| chr14 | 40200001 | 40300000 | 453 | 588 | 40250000 | -0.18034 | 0.011988 | 0 |
| chr14 | 41000001 | 41100000 | 382 | 482 | 41050000 | -0.1395  | 0.040047 | 0 |
| chr14 | 41050001 | 41150000 | 375 | 480 | 41100000 | -0.16018 | 0.022351 | 0 |
| chr14 | 41300001 | 41400000 | 377 | 475 | 41350000 | -0.1374  | 0.042353 | 0 |
| chr14 | 41450001 | 41550000 | 384 | 489 | 41500000 | -0.15277 | 0.027729 | 0 |
| chr14 | 42150001 | 42250000 | 385 | 484 | 42200000 | -0.13419 | 0.046095 | 0 |
| chr14 | 42250001 | 42350000 | 421 | 542 | 42300000 | -0.16851 | 0.017393 | 0 |
| chr14 | 42550001 | 42650000 | 376 | 478 | 42600000 | -0.15031 | 0.029728 | 0 |
| chr14 | 42600001 | 42700000 | 359 | 464 | 42650000 | -0.17418 | 0.014587 | 0 |
| chr14 | 42800001 | 42900000 | 389 | 492 | 42850000 | -0.14293 | 0.0365   | 0 |
| chr14 | 43000001 | 43100000 | 378 | 492 | 43050000 | -0.18431 | 0.010538 | 0 |
| chr14 | 43050001 | 43150000 | 371 | 482 | 43100000 | -0.18165 | 0.011491 | 0 |
| chr14 | 43250001 | 43350000 | 345 | 443 | 43300000 | -0.16475 | 0.019502 | 0 |
| chr14 | 43400001 | 43500000 | 353 | 445 | 43450000 | -0.13817 | 0.041489 | 0 |
| chr14 | 43450001 | 43550000 | 363 | 471 | 43500000 | -0.17979 | 0.012201 | 0 |
| chr14 | 44650001 | 44750000 | 375 | 486 | 44700000 | -0.1781  | 0.012881 | 0 |
| chr14 | 45550001 | 45650000 | 571 | 588 | 45600000 | 0.153638 | 0.026188 | 0 |
| chr14 | 45950001 | 46050000 | 395 | 500 | 4.60E+07 | -0.14411 | 0.035333 | 0 |
| chr14 | 46150001 | 46250000 | 383 | 483 | 46200000 | -0.13872 | 0.040894 | 0 |
| chr14 | 46200001 | 46300000 | 394 | 495 | 46250000 | -0.13327 | 0.047209 | 0 |
| chr14 | 46400001 | 46500000 | 358 | 465 | 46450000 | -0.18131 | 0.01162  | 0 |
| chr14 | 46600001 | 46700000 | 362 | 468 | 46650000 | -0.17456 | 0.014414 | 0 |
| chr14 | 46750001 | 46850000 | 391 | 501 | 46800000 | -0.16168 | 0.02138  | 0 |
| chr14 | 46800001 | 46900000 | 390 | 495 | 46850000 | -0.14799 | 0.031734 | 0 |
| chr14 | 47200001 | 47300000 | 375 | 473 | 47250000 | -0.13899 | 0.040599 | 0 |
| chr14 | 47300001 | 47400000 | 381 | 479 | 47350000 | -0.13427 | 0.045992 | 0 |
| chr14 | 47600001 | 47700000 | 391 | 495 | 47650000 | -0.1443  | 0.035155 | 0 |
| chr14 | 48400001 | 48500000 | 380 | 481 | 48450000 | -0.14407 | 0.03537  | 0 |
| chr14 | 48450001 | 48550000 | 389 | 492 | 48500000 | -0.14293 | 0.0365   | 0 |
| chr14 | 48600001 | 48700000 | 380 | 493 | 48650000 | -0.17963 | 0.012268 | 0 |
| chr14 | 49150001 | 49250000 | 395 | 499 | 49200000 | -0.14122 | 0.038226 | 0 |
| chr14 | 49700001 | 49800000 | 486 | 624 | 49750000 | -0.16463 | 0.019573 | 0 |
| chr14 | 50300001 | 50400000 | 547 | 558 | 50350000 | 0.167239 | 0.017363 | 0 |
| chr14 | 50350001 | 50450000 | 576 | 598 | 50400000 | 0.141886 | 0.036585 | 0 |
| chr14 | 50900001 | 51000000 | 582 | 731 | 50950000 | -0.13289 | 0.047679 | 0 |
| chr14 | 51100001 | 51200000 | 543 | 684 | 51150000 | -0.13708 | 0.042713 | 0 |
| chr14 | 52250001 | 52350000 | 510 | 646 | 52300000 | -0.14507 | 0.034411 | 0 |
| chr14 | 52550001 | 52650000 | 439 | 558 | 52600000 | -0.15008 | 0.029925 | 0 |
| chr14 | 52750001 | 52850000 | 617 | 645 | 52800000 | 0.131934 | 0.047841 | 0 |
| chr14 | 52900001 | 53000000 | 487 | 611 | 52950000 | -0.13129 | 0.049695 | 0 |
| chr14 | 53000001 | 53100000 | 582 | 593 | 53050000 | 0.16895  | 0.016458 | 0 |

|       |          |          |      |      |          |          |          |   |
|-------|----------|----------|------|------|----------|----------|----------|---|
| chr14 | 53100001 | 53200000 | 582  | 605  | 53150000 | 0.140047 | 0.038484 | 0 |
| chr14 | 53800001 | 53900000 | 477  | 606  | 53850000 | -0.14937 | 0.030535 | 0 |
| chr14 | 54300001 | 54400000 | 443  | 571  | 54350000 | -0.17022 | 0.016501 | 0 |
| chr14 | 54350001 | 54450000 | 496  | 629  | 54400000 | -0.14676 | 0.032845 | 0 |
| chr14 | 54600001 | 54700000 | 494  | 626  | 54650000 | -0.14569 | 0.033832 | 0 |
| chr14 | 55150001 | 55250000 | 714  | 732  | 55200000 | 0.160043 | 0.021649 | 0 |
| chr14 | 55300001 | 55400000 | 597  | 604  | 55350000 | 0.179145 | 0.011862 | 0 |
| chr14 | 55400001 | 55500000 | 540  | 546  | 55450000 | 0.180021 | 0.011525 | 0 |
| chr14 | 56200001 | 56300000 | 587  | 598  | 56250000 | 0.169178 | 0.016341 | 0 |
| chr14 | 56850001 | 56950000 | 403  | 519  | 56900000 | -0.16899 | 0.017138 | 0 |
| chr14 | 58000001 | 58100000 | 436  | 551  | 58050000 | -0.14176 | 0.037674 | 0 |
| chr14 | 58050001 | 58150000 | 405  | 520  | 58100000 | -0.16463 | 0.019573 | 0 |
| chr14 | 59250001 | 59350000 | 580  | 590  | 59300000 | 0.171301 | 0.015281 | 0 |
| chr14 | 59500001 | 59600000 | 522  | 657  | 59550000 | -0.13588 | 0.04409  | 0 |
| chr14 | 61400001 | 61500000 | 576  | 581  | 61450000 | 0.183494 | 0.01027  | 0 |
| chr14 | 61550001 | 61650000 | 505  | 644  | 61600000 | -0.15481 | 0.026144 | 0 |
| chr14 | 61600001 | 61700000 | 547  | 696  | 61650000 | -0.15158 | 0.028679 | 0 |
| chr14 | 61650001 | 61750000 | 566  | 716  | 61700000 | -0.14319 | 0.036232 | 0 |
| chr14 | 61950001 | 62050000 | 792  | 813  | 6.20E+07 | 0.158208 | 0.022876 | 0 |
| chr14 | 62750001 | 62850000 | 428  | 551  | 62800000 | -0.16848 | 0.01741  | 0 |
| chr14 | 63050001 | 63150000 | 451  | 570  | 63100000 | -0.14187 | 0.037562 | 0 |
| chr14 | 63250001 | 63350000 | 434  | 555  | 63300000 | -0.15883 | 0.023259 | 0 |
| chr14 | 63350001 | 63450000 | 465  | 591  | 63400000 | -0.14996 | 0.030024 | 0 |
| chr14 | 63400001 | 63500000 | 491  | 632  | 63450000 | -0.16824 | 0.017538 | 0 |
| chr14 | 63700001 | 63800000 | 493  | 622  | 63750000 | -0.13936 | 0.04019  | 0 |
| chr14 | 63750001 | 63850000 | 453  | 570  | 63800000 | -0.13549 | 0.044548 | 0 |
| chr14 | 64800001 | 64900000 | 577  | 588  | 64850000 | 0.168718 | 0.016579 | 0 |
| chr14 | 64850001 | 64950000 | 642  | 656  | 64900000 | 0.164841 | 0.018703 | 0 |
| chr14 | 64900001 | 65000000 | 657  | 678  | 64950000 | 0.150571 | 0.028628 | 0 |
| chr14 | 64950001 | 65050000 | 609  | 620  | 6.50E+07 | 0.170137 | 0.015855 | 0 |
| chr14 | 65100001 | 65200000 | 670  | 689  | 65150000 | 0.15562  | 0.024705 | 0 |
| chr14 | 65150001 | 65250000 | 770  | 780  | 65200000 | 0.177347 | 0.012581 | 0 |
| chr14 | 65650001 | 65750000 | 572  | 591  | 65700000 | 0.14882  | 0.030105 | 0 |
| chr14 | 66350001 | 66450000 | 559  | 582  | 66400000 | 0.137792 | 0.040921 | 0 |
| chr14 | 66400001 | 66500000 | 575  | 593  | 66450000 | 0.151493 | 0.027876 | 0 |
| chr14 | 66750001 | 66850000 | 469  | 596  | 66800000 | -0.14976 | 0.030196 | 0 |
| chr14 | 67150001 | 67250000 | 414  | 532  | 67200000 | -0.16583 | 0.018872 | 0 |
| chr14 | 67600001 | 67700000 | 580  | 602  | 67650000 | 0.142252 | 0.036216 | 0 |
| chr14 | 67950001 | 68050000 | 963  | 1004 | 6.80E+07 | 0.135811 | 0.043164 | 0 |
| chr14 | 68000001 | 68100000 | 1049 | 1060 | 68050000 | 0.180913 | 0.011191 | 0 |
| chr14 | 68050001 | 68150000 | 973  | 1002 | 68100000 | 0.153592 | 0.026223 | 0 |
| chr14 | 69200001 | 69300000 | 1119 | 1131 | 69250000 | 0.180574 | 0.011317 | 0 |
| chr14 | 69350001 | 69450000 | 1119 | 1169 | 69400000 | 0.132898 | 0.046642 | 0 |
| chr14 | 69400001 | 69500000 | 1002 | 1040 | 69450000 | 0.142262 | 0.036207 | 0 |
| chr14 | 69550001 | 69650000 | 940  | 966  | 69600000 | 0.156601 | 0.023998 | 0 |
| chr14 | 69950001 | 70050000 | 995  | 1021 | 7.00E+07 | 0.158749 | 0.022509 | 0 |
| chr14 | 70650001 | 70750000 | 611  | 784  | 70700000 | -0.16372 | 0.020115 | 0 |

|       |          |          |      |      |          |          |          |   |
|-------|----------|----------|------|------|----------|----------|----------|---|
| chr14 | 71050001 | 71150000 | 932  | 973  | 71100000 | 0.133853 | 0.045478 | 0 |
| chr14 | 71850001 | 71950000 | 918  | 948  | 71900000 | 0.14957  | 0.029465 | 0 |
| chr14 | 73400001 | 73500000 | 921  | 948  | 73450000 | 0.154277 | 0.025702 | 0 |
| chr14 | 73450001 | 73550000 | 792  | 824  | 73500000 | 0.138819 | 0.039796 | 0 |
| chr14 | 73900001 | 74000000 | 868  | 899  | 73950000 | 0.145337 | 0.03323  | 0 |
| chr14 | 73950001 | 74050000 | 598  | 611  | 7.40E+07 | 0.164936 | 0.018648 | 0 |
| chr14 | 74050001 | 74150000 | 811  | 847  | 74100000 | 0.133303 | 0.046145 | 0 |
| chr14 | 74200001 | 74300000 | 1023 | 1052 | 74250000 | 0.155634 | 0.024695 | 0 |
| chr14 | 74250001 | 74350000 | 943  | 978  | 74300000 | 0.143386 | 0.035094 | 0 |
| chr14 | 74350001 | 74450000 | 979  | 1010 | 74400000 | 0.150989 | 0.028285 | 0 |
| chr14 | 74450001 | 74550000 | 832  | 848  | 74500000 | 0.168482 | 0.016702 | 0 |
| chr14 | 74800001 | 74900000 | 986  | 1004 | 74850000 | 0.169863 | 0.015992 | 0 |
| chr14 | 75250001 | 75350000 | 991  | 1036 | 75300000 | 0.131896 | 0.047889 | 0 |
| chr14 | 75350001 | 75450000 | 1115 | 1166 | 75400000 | 0.131439 | 0.048467 | 0 |
| chr14 | 75600001 | 75700000 | 911  | 936  | 75650000 | 0.156906 | 0.023782 | 0 |
| chr14 | 75700001 | 75800000 | 979  | 996  | 75750000 | 0.171126 | 0.015366 | 0 |
| chr14 | 75850001 | 75950000 | 1128 | 1163 | 75900000 | 0.151879 | 0.027565 | 0 |
| chr14 | 76150001 | 76250000 | 972  | 1010 | 76200000 | 0.140636 | 0.037867 | 0 |
| chr14 | 76300001 | 76400000 | 856  | 886  | 76350000 | 0.146267 | 0.03237  | 0 |
| chr14 | 76350001 | 76450000 | 941  | 981  | 76400000 | 0.135905 | 0.043056 | 0 |
| chr14 | 77350001 | 77450000 | 996  | 1011 | 77400000 | 0.174398 | 0.013842 | 0 |
| chr14 | 77400001 | 77500000 | 1014 | 1023 | 77450000 | 0.183215 | 0.010367 | 0 |
| chr14 | 77450001 | 77550000 | 1065 | 1100 | 77500000 | 0.149313 | 0.029683 | 0 |
| chr14 | 77600001 | 77700000 | 1086 | 1134 | 77650000 | 0.133566 | 0.045825 | 0 |
| chr14 | 78100001 | 78200000 | 838  | 876  | 78150000 | 0.131982 | 0.047781 | 0 |
| chr14 | 78350001 | 78450000 | 809  | 1025 | 78400000 | -0.14545 | 0.034057 | 0 |
| chr14 | 78400001 | 78500000 | 763  | 971  | 78450000 | -0.15183 | 0.028482 | 0 |
| chr14 | 78450001 | 78550000 | 749  | 941  | 78500000 | -0.13327 | 0.047214 | 0 |
| chr14 | 78600001 | 78700000 | 839  | 1061 | 78650000 | -0.14272 | 0.036706 | 0 |
| chr14 | 79300001 | 79400000 | 677  | 857  | 79350000 | -0.14418 | 0.035271 | 0 |
| chr14 | 80450001 | 80550000 | 643  | 812  | 80500000 | -0.1407  | 0.038774 | 0 |
| chr14 | 80500001 | 80600000 | 680  | 869  | 80550000 | -0.15786 | 0.023931 | 0 |
| chr14 | 81350001 | 81450000 | 863  | 896  | 81400000 | 0.141825 | 0.036647 | 0 |
| chr14 | 82250001 | 82350000 | 614  | 786  | 82300000 | -0.16033 | 0.022255 | 0 |
| chr14 | 82400001 | 82500000 | 649  | 828  | 82450000 | -0.15545 | 0.025669 | 0 |
| chr14 | 82450001 | 82550000 | 624  | 793  | 82500000 | -0.14981 | 0.030154 | 0 |
| chr14 | 82900001 | 83000000 | 637  | 818  | 82950000 | -0.16484 | 0.019445 | 0 |
| chr14 | 83050001 | 83150000 | 608  | 781  | 83100000 | -0.16529 | 0.019186 | 0 |
| chr14 | 83500001 | 83600000 | 621  | 779  | 83550000 | -0.13107 | 0.049978 | 0 |
| chr14 | 83700001 | 83800000 | 650  | 821  | 83750000 | -0.14098 | 0.03848  | 0 |
| chr14 | 83800001 | 83900000 | 613  | 775  | 83850000 | -0.14235 | 0.03708  | 0 |
| chr14 | 84200001 | 84300000 | 613  | 786  | 84250000 | -0.16268 | 0.020752 | 0 |
| chr14 | 84400001 | 84500000 | 581  | 750  | 84450000 | -0.17239 | 0.015427 | 0 |
| chr14 | 84700001 | 84800000 | 614  | 777  | 84750000 | -0.14371 | 0.035722 | 0 |
| chr14 | 84750001 | 84850000 | 611  | 767  | 84800000 | -0.13209 | 0.048675 | 0 |
| chr14 | 84800001 | 84900000 | 580  | 748  | 84850000 | -0.17102 | 0.016096 | 0 |
| chr14 | 84900001 | 85000000 | 573  | 741  | 84950000 | -0.17498 | 0.014225 | 0 |



|       |          |          |      |      |          |          |          |   |
|-------|----------|----------|------|------|----------|----------|----------|---|
| chr14 | 85100001 | 85200000 | 589  | 765  | 85150000 | -0.18123 | 0.011649 | 0 |
| chr14 | 85300001 | 85400000 | 611  | 768  | 85350000 | -0.13397 | 0.046355 | 0 |
| chr14 | 85650001 | 85750000 | 629  | 800  | 85700000 | -0.15098 | 0.029177 | 0 |
| chr14 | 85700001 | 85800000 | 679  | 871  | 85750000 | -0.1633  | 0.020371 | 0 |
| chr14 | 86250001 | 86350000 | 623  | 797  | 86300000 | -0.15938 | 0.022883 | 0 |
| chr14 | 86400001 | 86500000 | 636  | 819  | 86450000 | -0.16887 | 0.0172   | 0 |
| chr14 | 86600001 | 86700000 | 614  | 791  | 86650000 | -0.16948 | 0.016884 | 0 |
| chr14 | 86650001 | 86750000 | 594  | 768  | 86700000 | -0.17468 | 0.014358 | 0 |
| chr14 | 86700001 | 86800000 | 578  | 734  | 86750000 | -0.14875 | 0.03107  | 0 |
| chr14 | 87550001 | 87650000 | 698  | 887  | 87600000 | -0.14974 | 0.030211 | 0 |
| chr14 | 87600001 | 87700000 | 666  | 851  | 87650000 | -0.15767 | 0.024061 | 0 |
| chr14 | 88500001 | 88600000 | 661  | 835  | 88550000 | -0.14116 | 0.03829  | 0 |
| chr14 | 88750001 | 88850000 | 876  | 884  | 88800000 | 0.182848 | 0.010494 | 0 |
| chr14 | 88900001 | 89000000 | 755  | 770  | 88950000 | 0.167581 | 0.017179 | 0 |
| chr14 | 89150001 | 89250000 | 703  | 896  | 89200000 | -0.15401 | 0.026756 | 0 |
| chr14 | 89450001 | 89550000 | 933  | 946  | 89500000 | 0.176    | 0.013144 | 0 |
| chr14 | 90650001 | 90750000 | 778  | 801  | 90700000 | 0.153931 | 0.025964 | 0 |
| chr14 | 90800001 | 90900000 | 891  | 899  | 90850000 | 0.183067 | 0.010418 | 0 |
| chr14 | 91100001 | 91200000 | 837  | 1059 | 91150000 | -0.14344 | 0.03599  | 0 |
| chr14 | 91200001 | 91300000 | 930  | 954  | 91250000 | 0.159204 | 0.022203 | 0 |
| chr14 | 91700001 | 91800000 | 998  | 1025 | 91750000 | 0.157451 | 0.023399 | 0 |
| chr14 | 91900001 | 92000000 | 753  | 768  | 91950000 | 0.167507 | 0.017219 | 0 |
| chr14 | 92000001 | 92100000 | 641  | 806  | 92050000 | -0.13449 | 0.045727 | 0 |
| chr14 | 93400001 | 93500000 | 1135 | 1164 | 93450000 | 0.159564 | 0.021964 | 0 |
| chr14 | 93800001 | 93900000 | 699  | 892  | 93850000 | -0.15579 | 0.025418 | 0 |
| chr14 | 94050001 | 94150000 | 877  | 911  | 94100000 | 0.141089 | 0.037399 | 0 |
| chr14 | 94350001 | 94450000 | 1074 | 1105 | 94400000 | 0.154911 | 0.025227 | 0 |
| chr14 | 94750001 | 94850000 | 767  | 988  | 94800000 | -0.16932 | 0.016965 | 0 |
| chr14 | 94900001 | 95000000 | 839  | 1058 | 94950000 | -0.13863 | 0.040983 | 0 |
| chr14 | 95950001 | 96050000 | 1023 | 1044 | 9.60E+07 | 0.166647 | 0.017686 | 0 |
| chr14 | 96800001 | 96900000 | 895  | 917  | 96850000 | 0.160929 | 0.021078 | 0 |
| chr14 | 97050001 | 97150000 | 881  | 1109 | 97100000 | -0.13608 | 0.043856 | 0 |
| chr14 | 97550001 | 97650000 | 729  | 939  | 97600000 | -0.16924 | 0.017006 | 0 |
| chr14 | 98100001 | 98200000 | 647  | 840  | 98150000 | -0.18066 | 0.011865 | 0 |
| chr14 | 99950001 | 1E+08    | 1212 | 1263 | 1.00E+08 | 0.136498 | 0.042375 | 0 |
| chr14 | 1E+08    | 1E+08    | 1122 | 1151 | 1E+08    | 0.159148 | 0.022241 | 0 |
| chr14 | 1E+08    | 1E+08    | 1112 | 1148 | 1E+08    | 0.149997 | 0.029105 | 0 |
| chr14 | 1E+08    | 1E+08    | 1096 | 1115 | 1E+08    | 0.171167 | 0.015346 | 0 |
| chr14 | 1E+08    | 1E+08    | 1033 | 1057 | 1E+08    | 0.162828 | 0.019895 | 0 |
| chr14 | 1E+08    | 1E+08    | 1019 | 1040 | 1E+08    | 0.166534 | 0.017749 | 0 |
| chr14 | 1E+08    | 1.01E+08 | 992  | 1020 | 1E+08    | 0.155806 | 0.02457  | 0 |
| chr14 | 1.01E+08 | 1.01E+08 | 1098 | 1137 | 1.01E+08 | 0.145609 | 0.032977 | 0 |
| chr14 | 1.01E+08 | 1.01E+08 | 1049 | 1069 | 1.01E+08 | 0.168716 | 0.01658  | 0 |
| chr14 | 1.01E+08 | 1.01E+08 | 979  | 1022 | 1.01E+08 | 0.133949 | 0.045363 | 0 |
| chr14 | 1.01E+08 | 1.01E+08 | 1150 | 1169 | 1.01E+08 | 0.172322 | 0.014793 | 0 |
| chr14 | 1.01E+08 | 1.01E+08 | 1267 | 1279 | 1.01E+08 | 0.182363 | 0.010665 | 0 |
| chr14 | 1.01E+08 | 1.01E+08 | 1309 | 1327 | 1.01E+08 | 0.17626  | 0.013034 | 0 |

|       |          |          |      |      |          |          |          |   |
|-------|----------|----------|------|------|----------|----------|----------|---|
| chr14 | 1.01E+08 | 1.01E+08 | 1246 | 1302 | 1.01E+08 | 0.132538 | 0.047088 | 0 |
| chr14 | 1.01E+08 | 1.01E+08 | 1006 | 1031 | 1.01E+08 | 0.160549 | 0.021321 | 0 |
| chr14 | 1.02E+08 | 1.02E+08 | 983  | 1018 | 1.02E+08 | 0.145489 | 0.033088 | 0 |
| chr14 | 1.02E+08 | 1.02E+08 | 998  | 1027 | 1.02E+08 | 0.154639 | 0.02543  | 0 |
| chr14 | 1.03E+08 | 1.03E+08 | 861  | 884  | 1.03E+08 | 0.15793  | 0.023067 | 0 |
| chr14 | 1.03E+08 | 1.03E+08 | 880  | 903  | 1.03E+08 | 0.158741 | 0.022514 | 0 |
| chr14 | 1.03E+08 | 1.03E+08 | 926  | 963  | 1.03E+08 | 0.139439 | 0.039129 | 0 |
| chr14 | 1.03E+08 | 1.03E+08 | 920  | 952  | 1.03E+08 | 0.146635 | 0.032035 | 0 |
| chr14 | 1.03E+08 | 1.03E+08 | 1130 | 1160 | 1.03E+08 | 0.158161 | 0.022908 | 0 |
| chr14 | 1.03E+08 | 1.04E+08 | 1056 | 1095 | 1.03E+08 | 0.143642 | 0.034845 | 0 |
| chr14 | 1.04E+08 | 1.04E+08 | 1007 | 1043 | 1.04E+08 | 0.145288 | 0.033276 | 0 |
| chr14 | 1.04E+08 | 1.04E+08 | 975  | 1014 | 1.04E+08 | 0.13938  | 0.039193 | 0 |
| chr14 | 1.04E+08 | 1.04E+08 | 965  | 982  | 1.04E+08 | 0.170769 | 0.015541 | 0 |
| chr14 | 1.05E+08 | 1.05E+08 | 1109 | 1148 | 1.05E+08 | 0.1461   | 0.032523 | 0 |
| chr14 | 1.05E+08 | 1.05E+08 | 1221 | 1270 | 1.05E+08 | 0.139198 | 0.039387 | 0 |
| chr14 | 1.05E+08 | 1.05E+08 | 1105 | 1119 | 1.05E+08 | 0.177799 | 0.012397 | 0 |
| chr14 | 1.06E+08 | 1.06E+08 | 1085 | 1099 | 1.06E+08 | 0.177467 | 0.012532 | 0 |
| chr14 | 1.06E+08 | 1.06E+08 | 328  | 333  | 1.06E+08 | 0.174137 | 0.013958 | 0 |
| chr14 | 1.06E+08 | 1.06E+08 | 851  | 883  | 1.06E+08 | 0.142709 | 0.035761 | 0 |
| chr14 | 1.06E+08 | 1.06E+08 | 569  | 579  | 1.06E+08 | 0.170828 | 0.015512 | 0 |
| chr14 | 1.07E+08 | 1.07E+08 | 717  | 745  | 1.07E+08 | 0.140696 | 0.037805 | 0 |
| chr14 | 1.07E+08 | 1.07E+08 | 686  | 714  | 1.07E+08 | 0.138248 | 0.040419 | 0 |
| chr15 | 20300001 | 20400000 | 34   | 25   | 20350000 | 0.63957  | 1.83E-15 | 0 |
| chr15 | 20350001 | 20450000 | 110  | 105  | 20400000 | 0.263077 | 0.000458 | 0 |
| chr15 | 20500001 | 20600000 | 871  | 1139 | 20550000 | -0.19106 | 0.008421 | 0 |
| chr15 | 20650001 | 20750000 | 8    | 13   | 20700000 | -0.50448 | 4.22E-10 | 0 |
| chr15 | 20700001 | 20800000 | 9    | 13   | 20750000 | -0.33455 | 1.73E-05 | 0 |
| chr15 | 20900001 | 21000000 | 10   | 7    | 20950000 | 0.710536 | 2.09E-18 | 0 |
| chr15 | 21050001 | 21150000 | 6    | 6    | 21100000 | 0.195963 | 0.006694 | 0 |
| chr15 | 21250001 | 21350000 | 18   | 15   | 21300000 | 0.458997 | 5.01E-09 | 0 |
| chr15 | 21300001 | 21400000 | 13   | 13   | 21350000 | 0.195963 | 0.006694 | 0 |
| chr15 | 21350001 | 21450000 | 1    | 2    | 21400000 | -0.80404 | 3.29E-21 | 0 |
| chr15 | 21800001 | 21900000 | 7    | 18   | 21850000 | -1.16661 | 1.60E-37 | 0 |
| chr15 | 21950001 | 22050000 | 26   | 22   | 2.20E+07 | 0.436971 | 2.34E-08 | 0 |
| chr15 | 22050001 | 22150000 | 14   | 19   | 22100000 | -0.24461 | 0.001147 | 0 |
| chr15 | 22100001 | 22200000 | 21   | 32   | 22150000 | -0.41172 | 2.11E-07 | 0 |
| chr15 | 22150001 | 22250000 | 13   | 22   | 22200000 | -0.56303 | 5.23E-12 | 0 |
| chr15 | 22250001 | 22350000 | 373  | 487  | 22300000 | -0.18878 | 0.009089 | 0 |
| chr15 | 22600001 | 22700000 | 9    | 13   | 22650000 | -0.33455 | 1.73E-05 | 0 |
| chr15 | 22650001 | 22750000 | 10   | 14   | 22700000 | -0.28946 | 0.000161 | 0 |
| chr15 | 22800001 | 22900000 | 549  | 538  | 22850000 | 0.225163 | 0.002254 | 0 |
| chr15 | 22950001 | 23050000 | 667  | 648  | 2.30E+07 | 0.237656 | 0.001363 | 0 |
| chr15 | 23000001 | 23100000 | 582  | 555  | 23050000 | 0.264494 | 0.000429 | 0 |
| chr15 | 23150001 | 23250000 | 53   | 70   | 23200000 | -0.2054  | 0.005126 | 0 |
| chr15 | 23250001 | 23350000 | 16   | 7    | 23300000 | 1.388608 | 8.61E-53 | 0 |
| chr15 | 23300001 | 23400000 | 5    | 4    | 23350000 | 0.517891 | 6.05E-11 | 0 |
| chr15 | 23350001 | 23450000 | 3    | 4    | 23400000 | -0.21907 | 0.003112 | 0 |

|       |          |          |     |     |          |          |           |   |
|-------|----------|----------|-----|-----|----------|----------|-----------|---|
| chr15 | 23400001 | 23500000 | 6   | 4   | 23450000 | 0.780926 | 1.60E-21  | 0 |
| chr15 | 23450001 | 23550000 | 5   | 5   | 23500000 | 0.195963 | 0.006694  | 0 |
| chr15 | 23500001 | 23600000 | 2   | 3   | 23550000 | -0.389   | 8.31E-07  | 0 |
| chr15 | 23850001 | 23950000 | 405 | 555 | 23900000 | -0.2586  | 0.00064   | 0 |
| chr15 | 24350001 | 24450000 | 113 | 153 | 24400000 | -0.24125 | 0.001315  | 0 |
| chr15 | 24400001 | 24500000 | 126 | 178 | 24450000 | -0.30249 | 8.70E-05  | 0 |
| chr15 | 24650001 | 24750000 | 124 | 123 | 24700000 | 0.207645 | 0.004394  | 0 |
| chr15 | 24850001 | 24950000 | 383 | 502 | 24900000 | -0.19438 | 0.007525  | 0 |
| chr15 | 25000001 | 25100000 | 394 | 535 | 25050000 | -0.24538 | 0.001111  | 0 |
| chr15 | 25050001 | 25150000 | 364 | 517 | 25100000 | -0.31026 | 5.95E-05  | 0 |
| chr15 | 25150001 | 25250000 | 398 | 519 | 25200000 | -0.187   | 0.009643  | 0 |
| chr15 | 25200001 | 25300000 | 440 | 587 | 25250000 | -0.21989 | 0.003018  | 0 |
| chr15 | 25250001 | 25350000 | 466 | 619 | 25300000 | -0.21365 | 0.003805  | 0 |
| chr15 | 25750001 | 25850000 | 446 | 584 | 25800000 | -0.19296 | 0.007897  | 0 |
| chr15 | 25800001 | 25900000 | 410 | 567 | 25850000 | -0.27176 | 0.000361  | 0 |
| chr15 | 25850001 | 25950000 | 447 | 583 | 25900000 | -0.18726 | 0.009561  | 0 |
| chr15 | 27050001 | 27150000 | 456 | 596 | 27100000 | -0.19032 | 0.008634  | 0 |
| chr15 | 27950001 | 28050000 | 490 | 655 | 2.80E+07 | -0.22275 | 0.00271   | 0 |
| chr15 | 28000001 | 28100000 | 511 | 674 | 28050000 | -0.20346 | 0.00549   | 0 |
| chr15 | 28400001 | 28500000 | 239 | 358 | 28450000 | -0.38699 | 9.36E-07  | 0 |
| chr15 | 28550001 | 28650000 | 30  | 22  | 28600000 | 0.643422 | 1.28E-15  | 0 |
| chr15 | 28600001 | 28700000 | 9   | 9   | 28650000 | 0.195963 | 0.006694  | 0 |
| chr15 | 28750001 | 28850000 | 2   | 5   | 28800000 | -1.12597 | 1.27E-35  | 0 |
| chr15 | 28800001 | 28900000 | 0   | 3   | 28850000 | #NAME?   | 3.67E-137 | 0 |
| chr15 | 28900001 | 29000000 | 15  | 25  | 28950000 | -0.541   | 2.84E-11  | 0 |
| chr15 | 28950001 | 29050000 | 41  | 57  | 2.90E+07 | -0.27937 | 0.000257  | 0 |
| chr15 | 29300001 | 29400000 | 651 | 638 | 29350000 | 0.225064 | 0.002262  | 0 |
| chr15 | 30350001 | 30450000 | 90  | 125 | 30400000 | -0.27797 | 0.000274  | 0 |
| chr15 | 30400001 | 30500000 | 14  | 13  | 30450000 | 0.302878 | 6.89E-05  | 0 |
| chr15 | 30750001 | 30850000 | 6   | 8   | 30800000 | -0.21907 | 0.003112  | 0 |
| chr15 | 30800001 | 30900000 | 3   | 2   | 30850000 | 0.780926 | 1.60E-21  | 0 |
| chr15 | 30850001 | 30950000 | 80  | 63  | 30900000 | 0.540611 | 9.83E-12  | 0 |
| chr15 | 30900001 | 31000000 | 182 | 179 | 30950000 | 0.219942 | 0.002762  | 0 |
| chr15 | 32000001 | 32100000 | 542 | 543 | 32050000 | 0.193304 | 0.007347  | 0 |
| chr15 | 32450001 | 32550000 | 33  | 71  | 32500000 | -0.90939 | 9.57E-26  | 0 |
| chr15 | 32500001 | 32600000 | 35  | 71  | 32550000 | -0.8245  | 4.52E-22  | 0 |
| chr15 | 32550001 | 32650000 | 7   | 11  | 32600000 | -0.45611 | 1.21E-08  | 0 |
| chr15 | 32600001 | 32700000 | 5   | 9   | 32650000 | -0.65203 | 3.56E-15  | 0 |
| chr15 | 32650001 | 32750000 | 4   | 3   | 32700000 | 0.611001 | 2.44E-14  | 0 |
| chr15 | 32700001 | 32800000 | 9   | 7   | 32750000 | 0.558533 | 2.25E-12  | 0 |
| chr15 | 32750001 | 32850000 | 11  | 11  | 32800000 | 0.195963 | 0.006694  | 0 |
| chr15 | 32800001 | 32900000 | 8   | 6   | 32850000 | 0.611001 | 2.44E-14  | 0 |
| chr15 | 32850001 | 32950000 | 180 | 173 | 32900000 | 0.253188 | 0.000707  | 0 |
| chr15 | 33450001 | 33550000 | 465 | 612 | 33500000 | -0.20034 | 0.006126  | 0 |
| chr15 | 33500001 | 33600000 | 459 | 603 | 33550000 | -0.1977  | 0.006714  | 0 |
| chr15 | 34200001 | 34300000 | 488 | 668 | 34250000 | -0.257   | 0.000685  | 0 |
| chr15 | 34250001 | 34350000 | 508 | 665 | 34300000 | -0.19256 | 0.008004  | 0 |

|       |          |          |     |     |          |          |          |   |
|-------|----------|----------|-----|-----|----------|----------|----------|---|
| chr15 | 34600001 | 34700000 | 485 | 485 | 34650000 | 0.195963 | 0.006694 | 0 |
| chr15 | 35700001 | 35800000 | 519 | 678 | 35750000 | -0.18959 | 0.008847 | 0 |
| chr15 | 36800001 | 36900000 | 570 | 563 | 36850000 | 0.21379  | 0.003494 | 0 |
| chr15 | 36900001 | 37000000 | 448 | 603 | 36950000 | -0.2327  | 0.001847 | 0 |
| chr15 | 36950001 | 37050000 | 437 | 575 | 3.70E+07 | -0.19997 | 0.006206 | 0 |
| chr15 | 38100001 | 38200000 | 473 | 645 | 38150000 | -0.2515  | 0.000863 | 0 |
| chr15 | 40150001 | 40250000 | 717 | 666 | 40200000 | 0.302414 | 7.06E-05 | 0 |
| chr15 | 40200001 | 40300000 | 689 | 664 | 40250000 | 0.249284 | 0.000837 | 0 |
| chr15 | 40250001 | 40350000 | 687 | 674 | 40300000 | 0.223525 | 0.002403 | 0 |
| chr15 | 40300001 | 40400000 | 777 | 763 | 40350000 | 0.222195 | 0.002531 | 0 |
| chr15 | 40500001 | 40600000 | 815 | 796 | 40550000 | 0.229995 | 0.00186  | 0 |
| chr15 | 40550001 | 40650000 | 917 | 896 | 40600000 | 0.229386 | 0.001906 | 0 |
| chr15 | 40600001 | 40700000 | 848 | 825 | 40650000 | 0.235633 | 0.001481 | 0 |
| chr15 | 40650001 | 40750000 | 778 | 770 | 40700000 | 0.210875 | 0.003898 | 0 |
| chr15 | 40700001 | 40800000 | 826 | 801 | 40750000 | 0.240303 | 0.001222 | 0 |
| chr15 | 40750001 | 40850000 | 752 | 753 | 40800000 | 0.194046 | 0.007159 | 0 |
| chr15 | 40850001 | 40950000 | 646 | 625 | 40900000 | 0.243641 | 0.001063 | 0 |
| chr15 | 41100001 | 41200000 | 757 | 716 | 41150000 | 0.276297 | 0.00025  | 0 |
| chr15 | 41150001 | 41250000 | 806 | 750 | 41200000 | 0.299852 | 8.02E-05 | 0 |
| chr15 | 41200001 | 41300000 | 813 | 812 | 41250000 | 0.197739 | 0.006287 | 0 |
| chr15 | 41400001 | 41500000 | 484 | 480 | 41450000 | 0.207936 | 0.004347 | 0 |
| chr15 | 41450001 | 41550000 | 552 | 551 | 41500000 | 0.198579 | 0.006102 | 0 |
| chr15 | 41500001 | 41600000 | 586 | 590 | 41550000 | 0.186149 | 0.009393 | 0 |
| chr15 | 41650001 | 41750000 | 544 | 500 | 41700000 | 0.317642 | 3.23E-05 | 0 |
| chr15 | 41700001 | 41800000 | 680 | 606 | 41750000 | 0.36218  | 2.72E-06 | 0 |
| chr15 | 41750001 | 41850000 | 686 | 685 | 41800000 | 0.198068 | 0.006214 | 0 |
| chr15 | 42200001 | 42300000 | 786 | 777 | 42250000 | 0.212578 | 0.003657 | 0 |
| chr15 | 42250001 | 42350000 | 776 | 775 | 42300000 | 0.197823 | 0.006268 | 0 |
| chr15 | 42650001 | 42750000 | 662 | 667 | 42700000 | 0.185107 | 0.009729 | 0 |
| chr15 | 42700001 | 42800000 | 648 | 642 | 42750000 | 0.209384 | 0.00412  | 0 |
| chr15 | 43200001 | 43300000 | 609 | 589 | 43250000 | 0.244138 | 0.001041 | 0 |
| chr15 | 43250001 | 43350000 | 588 | 578 | 43300000 | 0.22071  | 0.002682 | 0 |
| chr15 | 43400001 | 43500000 | 637 | 639 | 43450000 | 0.19144  | 0.007838 | 0 |
| chr15 | 43600001 | 43700000 | 775 | 737 | 43650000 | 0.268495 | 0.000358 | 0 |
| chr15 | 44700001 | 44800000 | 559 | 559 | 44750000 | 0.195963 | 0.006694 | 0 |
| chr15 | 45100001 | 45200000 | 190 | 258 | 45150000 | -0.24541 | 0.00111  | 0 |
| chr15 | 45300001 | 45400000 | 390 | 369 | 45350000 | 0.275816 | 0.000256 | 0 |
| chr15 | 46950001 | 47050000 | 416 | 545 | 4.70E+07 | -0.19371 | 0.007699 | 0 |
| chr15 | 48500001 | 48600000 | 500 | 664 | 48550000 | -0.21329 | 0.003855 | 0 |
| chr15 | 49800001 | 49900000 | 487 | 652 | 49850000 | -0.22499 | 0.002489 | 0 |
| chr15 | 50250001 | 50350000 | 530 | 703 | 50300000 | -0.21157 | 0.004105 | 0 |
| chr15 | 50300001 | 50400000 | 527 | 697 | 50350000 | -0.20739 | 0.004773 | 0 |
| chr15 | 50850001 | 50950000 | 592 | 585 | 50900000 | 0.213124 | 0.003583 | 0 |
| chr15 | 50900001 | 51000000 | 561 | 556 | 50950000 | 0.208879 | 0.004198 | 0 |
| chr15 | 51800001 | 51900000 | 473 | 647 | 51850000 | -0.25596 | 0.000716 | 0 |
| chr15 | 52700001 | 52800000 | 485 | 646 | 52750000 | -0.21759 | 0.00329  | 0 |
| chr15 | 53750001 | 53850000 | 405 | 574 | 53800000 | -0.30717 | 6.93E-05 | 0 |

|       |          |          |     |     |          |          |          |   |
|-------|----------|----------|-----|-----|----------|----------|----------|---|
| chr15 | 53800001 | 53900000 | 415 | 598 | 53850000 | -0.33107 | 2.07E-05 | 0 |
| chr15 | 53850001 | 53950000 | 445 | 588 | 53900000 | -0.20605 | 0.005009 | 0 |
| chr15 | 54700001 | 54800000 | 371 | 552 | 54750000 | -0.37729 | 1.65E-06 | 0 |
| chr15 | 54750001 | 54850000 | 423 | 578 | 54800000 | -0.25445 | 0.000763 | 0 |
| chr15 | 54900001 | 55000000 | 421 | 553 | 54950000 | -0.1975  | 0.006762 | 0 |
| chr15 | 56500001 | 56600000 | 637 | 639 | 56550000 | 0.19144  | 0.007838 | 0 |
| chr15 | 57250001 | 57350000 | 646 | 640 | 57300000 | 0.209425 | 0.004114 | 0 |
| chr15 | 58200001 | 58300000 | 521 | 705 | 58250000 | -0.24038 | 0.001361 | 0 |
| chr15 | 59900001 | 60000000 | 644 | 623 | 59950000 | 0.243792 | 0.001056 | 0 |
| chr15 | 60500001 | 60600000 | 539 | 712 | 60550000 | -0.20563 | 0.005084 | 0 |
| chr15 | 61600001 | 61700000 | 475 | 635 | 61650000 | -0.22287 | 0.002698 | 0 |
| chr15 | 61650001 | 61750000 | 469 | 637 | 61700000 | -0.24574 | 0.001095 | 0 |
| chr15 | 62650001 | 62750000 | 655 | 625 | 62700000 | 0.263602 | 0.000447 | 0 |
| chr15 | 63700001 | 63800000 | 732 | 714 | 63750000 | 0.231883 | 0.001724 | 0 |
| chr15 | 64350001 | 64450000 | 723 | 728 | 64400000 | 0.18602  | 0.009434 | 0 |
| chr15 | 65300001 | 65400000 | 792 | 761 | 65350000 | 0.253567 | 0.000696 | 0 |
| chr15 | 65650001 | 65750000 | 752 | 723 | 65700000 | 0.2527   | 0.000722 | 0 |
| chr15 | 65700001 | 65800000 | 611 | 612 | 65750000 | 0.193604 | 0.007271 | 0 |
| chr15 | 65750001 | 65850000 | 558 | 560 | 65800000 | 0.190801 | 0.008013 | 0 |
| chr15 | 65800001 | 65900000 | 620 | 609 | 65850000 | 0.221789 | 0.002572 | 0 |
| chr15 | 66750001 | 66850000 | 669 | 655 | 66800000 | 0.226474 | 0.00214  | 0 |
| chr15 | 66900001 | 67000000 | 788 | 787 | 66950000 | 0.197795 | 0.006274 | 0 |
| chr15 | 66950001 | 67050000 | 873 | 793 | 6.70E+07 | 0.334624 | 1.30E-05 | 0 |
| chr15 | 67050001 | 67150000 | 747 | 752 | 67100000 | 0.186339 | 0.009333 | 0 |
| chr15 | 67100001 | 67200000 | 739 | 744 | 67150000 | 0.186235 | 0.009366 | 0 |
| chr15 | 67250001 | 67350000 | 665 | 670 | 67300000 | 0.185156 | 0.009713 | 0 |
| chr15 | 67400001 | 67500000 | 843 | 755 | 67450000 | 0.355019 | 4.13E-06 | 0 |
| chr15 | 67450001 | 67550000 | 745 | 723 | 67500000 | 0.239208 | 0.001279 | 0 |
| chr15 | 68100001 | 68200000 | 707 | 685 | 68150000 | 0.241569 | 0.001159 | 0 |
| chr15 | 69700001 | 69800000 | 708 | 701 | 69750000 | 0.210298 | 0.003982 | 0 |
| chr15 | 70150001 | 70250000 | 581 | 786 | 70200000 | -0.24003 | 0.001381 | 0 |
| chr15 | 70250001 | 70350000 | 713 | 704 | 70300000 | 0.21429  | 0.003428 | 0 |
| chr15 | 70300001 | 70400000 | 799 | 784 | 70350000 | 0.223305 | 0.002424 | 0 |
| chr15 | 72500001 | 72600000 | 751 | 753 | 72550000 | 0.192126 | 0.007654 | 0 |
| chr15 | 72750001 | 72850000 | 650 | 644 | 72800000 | 0.209342 | 0.004126 | 0 |
| chr15 | 74350001 | 74450000 | 372 | 372 | 74400000 | 0.195963 | 0.006694 | 0 |
| chr15 | 74400001 | 74500000 | 788 | 783 | 74450000 | 0.205146 | 0.004816 | 0 |
| chr15 | 74450001 | 74550000 | 862 | 856 | 74500000 | 0.20604  | 0.004661 | 0 |
| chr15 | 75000001 | 75100000 | 782 | 763 | 75050000 | 0.231449 | 0.001755 | 0 |
| chr15 | 75050001 | 75150000 | 870 | 836 | 75100000 | 0.253475 | 0.000699 | 0 |
| chr15 | 75100001 | 75200000 | 784 | 777 | 75150000 | 0.208902 | 0.004194 | 0 |
| chr15 | 75150001 | 75250000 | 672 | 651 | 75200000 | 0.241767 | 0.00115  | 0 |
| chr15 | 75200001 | 75300000 | 675 | 638 | 75250000 | 0.277294 | 0.000239 | 0 |
| chr15 | 75250001 | 75350000 | 781 | 753 | 75300000 | 0.248636 | 0.00086  | 0 |
| chr15 | 75300001 | 75400000 | 718 | 720 | 75350000 | 0.19195  | 0.007701 | 0 |
| chr15 | 75350001 | 75450000 | 604 | 601 | 75400000 | 0.203147 | 0.005179 | 0 |
| chr15 | 75550001 | 75650000 | 303 | 275 | 75600000 | 0.335849 | 1.21E-05 | 0 |

|       |          |          |     |     |          |          |           |   |
|-------|----------|----------|-----|-----|----------|----------|-----------|---|
| chr15 | 75600001 | 75700000 | 640 | 570 | 75650000 | 0.363073 | 2.58E-06  | 0 |
| chr15 | 75650001 | 75750000 | 704 | 645 | 75700000 | 0.322239 | 2.53E-05  | 0 |
| chr15 | 75700001 | 75800000 | 643 | 638 | 75750000 | 0.207225 | 0.004462  | 0 |
| chr15 | 75900001 | 76000000 | 714 | 709 | 75950000 | 0.206101 | 0.00465   | 0 |
| chr15 | 75950001 | 76050000 | 622 | 610 | 7.60E+07 | 0.224068 | 0.002353  | 0 |
| chr15 | 76100001 | 76200000 | 704 | 703 | 76150000 | 0.198014 | 0.006226  | 0 |
| chr15 | 76550001 | 76650000 | 717 | 721 | 76600000 | 0.187937 | 0.00884   | 0 |
| chr15 | 77350001 | 77450000 | 622 | 605 | 77400000 | 0.235942 | 0.001462  | 0 |
| chr15 | 77400001 | 77500000 | 582 | 582 | 77450000 | 0.195963 | 0.006694  | 0 |
| chr15 | 78850001 | 78950000 | 626 | 610 | 78900000 | 0.233316 | 0.001627  | 0 |
| chr15 | 79150001 | 79250000 | 630 | 632 | 79200000 | 0.19139  | 0.007852  | 0 |
| chr15 | 79850001 | 79950000 | 505 | 660 | 79900000 | -0.19022 | 0.008662  | 0 |
| chr15 | 79900001 | 80000000 | 484 | 661 | 79950000 | -0.25368 | 0.000788  | 0 |
| chr15 | 80800001 | 80900000 | 794 | 799 | 80850000 | 0.186907 | 0.009155  | 0 |
| chr15 | 80900001 | 81000000 | 744 | 745 | 80950000 | 0.194025 | 0.007165  | 0 |
| chr15 | 82650001 | 82750000 | 1   | 1   | 82700000 | 0.195963 | 0.006694  | 0 |
| chr15 | 82700001 | 82800000 | 0   | 1   | 82750000 | #NAME?   | 3.67E-137 | 0 |
| chr15 | 82850001 | 82950000 | 0   | 1   | 82900000 | #NAME?   | 3.67E-137 | 0 |
| chr15 | 82900001 | 83000000 | 0   | 1   | 82950000 | #NAME?   | 3.67E-137 | 0 |
| chr15 | 83000001 | 83100000 | 0   | 1   | 83050000 | #NAME?   | 3.67E-137 | 0 |
| chr15 | 83050001 | 83150000 | 0   | 1   | 83100000 | #NAME?   | 3.67E-137 | 0 |
| chr15 | 83100001 | 83200000 | 0   | 1   | 83150000 | #NAME?   | 3.67E-137 | 0 |
| chr15 | 83600001 | 83700000 | 627 | 592 | 83650000 | 0.278831 | 0.000222  | 0 |
| chr15 | 83650001 | 83750000 | 586 | 554 | 83700000 | 0.276978 | 0.000242  | 0 |
| chr15 | 84750001 | 84850000 | 183 | 254 | 84800000 | -0.27702 | 0.000285  | 0 |
| chr15 | 84800001 | 84900000 | 57  | 108 | 84850000 | -0.72603 | 5.03E-18  | 0 |
| chr15 | 84850001 | 84950000 | 37  | 31  | 84900000 | 0.45122  | 8.70E-09  | 0 |
| chr15 | 84900001 | 85000000 | 48  | 48  | 84950000 | 0.195963 | 0.006694  | 0 |
| chr15 | 84950001 | 85050000 | 19  | 28  | 8.50E+07 | -0.36346 | 3.61E-06  | 0 |
| chr15 | 85100001 | 85200000 | 561 | 548 | 85150000 | 0.229788 | 0.001876  | 0 |
| chr15 | 85150001 | 85250000 | 677 | 625 | 85200000 | 0.311263 | 4.50E-05  | 0 |
| chr15 | 85200001 | 85300000 | 659 | 619 | 85250000 | 0.286302 | 0.000156  | 0 |
| chr15 | 85250001 | 85350000 | 689 | 694 | 85300000 | 0.185531 | 0.009591  | 0 |
| chr15 | 85700001 | 85800000 | 157 | 153 | 85750000 | 0.233196 | 0.001635  | 0 |
| chr15 | 85850001 | 85950000 | 642 | 631 | 85900000 | 0.220896 | 0.002662  | 0 |
| chr15 | 86300001 | 86400000 | 666 | 668 | 86350000 | 0.191637 | 0.007785  | 0 |
| chr15 | 86950001 | 87050000 | 388 | 550 | 8.70E+07 | -0.30741 | 6.85E-05  | 0 |
| chr15 | 87000001 | 87100000 | 397 | 535 | 87050000 | -0.23444 | 0.001725  | 0 |
| chr15 | 87800001 | 87900000 | 397 | 518 | 87850000 | -0.18785 | 0.009375  | 0 |
| chr15 | 87850001 | 87950000 | 404 | 550 | 87900000 | -0.24911 | 0.000953  | 0 |
| chr15 | 88050001 | 88150000 | 430 | 568 | 88100000 | -0.20559 | 0.005091  | 0 |
| chr15 | 88800001 | 88900000 | 616 | 816 | 88850000 | -0.20968 | 0.004397  | 0 |
| chr15 | 88850001 | 88950000 | 555 | 729 | 88900000 | -0.19747 | 0.006768  | 0 |
| chr15 | 89750001 | 89850000 | 640 | 609 | 89800000 | 0.267593 | 0.000373  | 0 |
| chr15 | 89800001 | 89900000 | 732 | 697 | 89850000 | 0.266648 | 0.00039   | 0 |
| chr15 | 90250001 | 90350000 | 757 | 760 | 90300000 | 0.190257 | 0.008165  | 0 |
| chr15 | 90650001 | 90750000 | 652 | 603 | 90700000 | 0.308677 | 5.14E-05  | 0 |

|       |          |          |     |      |          |          |          |   |
|-------|----------|----------|-----|------|----------|----------|----------|---|
| chr15 | 90700001 | 90800000 | 760 | 666  | 90750000 | 0.38644  | 6.32E-07 | 0 |
| chr15 | 90750001 | 90850000 | 669 | 646  | 90800000 | 0.246435 | 0.000945 | 0 |
| chr15 | 91350001 | 91450000 | 752 | 749  | 91400000 | 0.20173  | 0.005451 | 0 |
| chr15 | 91400001 | 91500000 | 861 | 814  | 91450000 | 0.276947 | 0.000243 | 0 |
| chr15 | 91450001 | 91550000 | 803 | 770  | 91500000 | 0.256505 | 0.000612 | 0 |
| chr15 | 91850001 | 91950000 | 514 | 702  | 91900000 | -0.25374 | 0.000786 | 0 |
| chr15 | 93350001 | 93450000 | 638 | 638  | 93400000 | 0.195963 | 0.006694 | 0 |
| chr15 | 93400001 | 93500000 | 710 | 710  | 93450000 | 0.195963 | 0.006694 | 0 |
| chr15 | 93500001 | 93600000 | 720 | 702  | 93550000 | 0.232489 | 0.001683 | 0 |
| chr15 | 94200001 | 94300000 | 419 | 561  | 94250000 | -0.22509 | 0.002479 | 0 |
| chr15 | 94600001 | 94700000 | 480 | 629  | 94650000 | -0.19406 | 0.007607 | 0 |
| chr15 | 95250001 | 95350000 | 410 | 547  | 95300000 | -0.21995 | 0.003011 | 0 |
| chr15 | 95550001 | 95650000 | 421 | 552  | 95600000 | -0.19488 | 0.007396 | 0 |
| chr15 | 95900001 | 96000000 | 443 | 586  | 95950000 | -0.20763 | 0.004733 | 0 |
| chr15 | 96850001 | 96950000 | 706 | 687  | 96900000 | 0.235321 | 0.0015   | 0 |
| chr15 | 96900001 | 97000000 | 597 | 575  | 96950000 | 0.250132 | 0.000807 | 0 |
| chr15 | 97450001 | 97550000 | 419 | 567  | 97500000 | -0.24044 | 0.001358 | 0 |
| chr15 | 97500001 | 97600000 | 462 | 602  | 97550000 | -0.18591 | 0.009998 | 0 |
| chr15 | 97650001 | 97750000 | 459 | 609  | 97700000 | -0.21199 | 0.004043 | 0 |
| chr15 | 97700001 | 97800000 | 441 | 600  | 97750000 | -0.24822 | 0.000989 | 0 |
| chr15 | 97750001 | 97850000 | 374 | 493  | 97800000 | -0.20259 | 0.005662 | 0 |
| chr15 | 98050001 | 98150000 | 448 | 597  | 98100000 | -0.21827 | 0.003207 | 0 |
| chr15 | 98250001 | 98350000 | 479 | 625  | 98300000 | -0.18787 | 0.00937  | 0 |
| chr15 | 1.02E+08 | 1.02E+08 | 639 | 627  | 1.02E+08 | 0.223314 | 0.002423 | 0 |
| chr15 | 1.02E+08 | 1.02E+08 | 653 | 647  | 1.02E+08 | 0.20928  | 0.004136 | 0 |
| chr15 | 1.02E+08 | 1.03E+08 | 15  | 23   | 1.02E+08 | -0.42071 | 1.20E-07 | 0 |
| chr15 | 1.03E+08 | 1.03E+08 | 11  | 15   | 1.03E+08 | -0.2515  | 0.000863 | 0 |
| chr15 | 20200001 | 20300000 | 7   | 9    | 20250000 | -0.16661 | 0.018434 | 0 |
| chr15 | 20250001 | 20350000 | 22  | 23   | 20300000 | 0.131833 | 0.047969 | 0 |
| chr15 | 20550001 | 20650000 | 876 | 1106 | 20600000 | -0.14039 | 0.039102 | 0 |
| chr15 | 20950001 | 21050000 | 7   | 9    | 2.10E+07 | -0.16661 | 0.018434 | 0 |
| chr15 | 21000001 | 21100000 | 7   | 9    | 21050000 | -0.16661 | 0.018434 | 0 |
| chr15 | 21150001 | 21250000 | 25  | 32   | 21200000 | -0.16018 | 0.022351 | 0 |
| chr15 | 22450001 | 22550000 | 992 | 1272 | 22500000 | -0.16272 | 0.020724 | 0 |
| chr15 | 22500001 | 22600000 | 751 | 945  | 22550000 | -0.13554 | 0.044489 | 0 |
| chr15 | 22850001 | 22950000 | 625 | 640  | 22900000 | 0.161747 | 0.020561 | 0 |
| chr15 | 22900001 | 23000000 | 667 | 696  | 22950000 | 0.134562 | 0.044628 | 0 |
| chr15 | 23050001 | 23150000 | 280 | 290  | 23100000 | 0.145337 | 0.03323  | 0 |
| chr15 | 23750001 | 23850000 | 471 | 591  | 23800000 | -0.13147 | 0.049464 | 0 |
| chr15 | 23800001 | 23900000 | 454 | 572  | 23850000 | -0.13736 | 0.042398 | 0 |
| chr15 | 23900001 | 24000000 | 376 | 478  | 23950000 | -0.15031 | 0.029728 | 0 |
| chr15 | 24050001 | 24150000 | 462 | 596  | 24100000 | -0.17146 | 0.015881 | 0 |
| chr15 | 24100001 | 24200000 | 457 | 586  | 24150000 | -0.16274 | 0.020712 | 0 |
| chr15 | 24500001 | 24600000 | 116 | 117  | 24550000 | 0.183579 | 0.010241 | 0 |
| chr15 | 24900001 | 25000000 | 396 | 504  | 24950000 | -0.15196 | 0.028373 | 0 |
| chr15 | 25100001 | 25200000 | 373 | 482  | 25150000 | -0.17389 | 0.014717 | 0 |
| chr15 | 25900001 | 26000000 | 503 | 638  | 25950000 | -0.14703 | 0.032592 | 0 |

|       |          |          |     |     |          |          |          |   |
|-------|----------|----------|-----|-----|----------|----------|----------|---|
| chr15 | 26250001 | 26350000 | 479 | 493 | 26300000 | 0.154401 | 0.025608 | 0 |
| chr15 | 26300001 | 26400000 | 475 | 486 | 26350000 | 0.162934 | 0.01983  | 0 |
| chr15 | 26500001 | 26600000 | 414 | 539 | 26550000 | -0.18469 | 0.010406 | 0 |
| chr15 | 26550001 | 26650000 | 426 | 538 | 26600000 | -0.14079 | 0.038678 | 0 |
| chr15 | 26750001 | 26850000 | 406 | 518 | 26800000 | -0.15551 | 0.025624 | 0 |
| chr15 | 27100001 | 27200000 | 488 | 616 | 27150000 | -0.14009 | 0.039418 | 0 |
| chr15 | 27200001 | 27300000 | 440 | 567 | 27250000 | -0.16988 | 0.016674 | 0 |
| chr15 | 27350001 | 27450000 | 419 | 535 | 27400000 | -0.15663 | 0.024808 | 0 |
| chr15 | 28150001 | 28250000 | 494 | 629 | 28200000 | -0.15259 | 0.027871 | 0 |
| chr15 | 28650001 | 28750000 | 50  | 65  | 28700000 | -0.18255 | 0.011161 | 0 |
| chr15 | 29150001 | 29250000 | 323 | 337 | 29200000 | 0.134749 | 0.044407 | 0 |
| chr15 | 29200001 | 29300000 | 588 | 607 | 29250000 | 0.150083 | 0.029034 | 0 |
| chr15 | 29250001 | 29350000 | 607 | 616 | 29300000 | 0.174729 | 0.013695 | 0 |
| chr15 | 29350001 | 29450000 | 703 | 718 | 29400000 | 0.165504 | 0.018324 | 0 |
| chr15 | 29650001 | 29750000 | 478 | 611 | 29700000 | -0.1582  | 0.023694 | 0 |
| chr15 | 29950001 | 30050000 | 603 | 619 | 3.00E+07 | 0.158182 | 0.022894 | 0 |
| chr15 | 31000001 | 31100000 | 145 | 184 | 31050000 | -0.14769 | 0.032003 | 0 |
| chr15 | 31050001 | 31150000 | 234 | 244 | 31100000 | 0.13559  | 0.04342  | 0 |
| chr15 | 31150001 | 31250000 | 527 | 671 | 31200000 | -0.15255 | 0.027902 | 0 |
| chr15 | 31450001 | 31550000 | 667 | 689 | 31500000 | 0.149146 | 0.029825 | 0 |
| chr15 | 32200001 | 32300000 | 580 | 728 | 32250000 | -0.13192 | 0.048887 | 0 |
| chr15 | 32250001 | 32350000 | 540 | 680 | 32300000 | -0.13661 | 0.043246 | 0 |
| chr15 | 33950001 | 34050000 | 526 | 663 | 3.40E+07 | -0.13798 | 0.041701 | 0 |
| chr15 | 34000001 | 34100000 | 530 | 666 | 34050000 | -0.13357 | 0.046846 | 0 |
| chr15 | 34550001 | 34650000 | 617 | 627 | 34600000 | 0.172768 | 0.014584 | 0 |
| chr15 | 34650001 | 34750000 | 262 | 274 | 34700000 | 0.131354 | 0.048575 | 0 |
| chr15 | 34750001 | 34850000 | 243 | 311 | 34800000 | -0.16    | 0.022474 | 0 |
| chr15 | 35650001 | 35750000 | 487 | 615 | 35700000 | -0.1407  | 0.03877  | 0 |
| chr15 | 36400001 | 36500000 | 435 | 560 | 36450000 | -0.16845 | 0.017426 | 0 |
| chr15 | 36450001 | 36550000 | 391 | 509 | 36500000 | -0.18453 | 0.01046  | 0 |
| chr15 | 36500001 | 36600000 | 388 | 494 | 36550000 | -0.15249 | 0.027946 | 0 |
| chr15 | 36600001 | 36700000 | 424 | 533 | 36650000 | -0.13411 | 0.046189 | 0 |
| chr15 | 36650001 | 36750000 | 435 | 566 | 36700000 | -0.18382 | 0.010706 | 0 |
| chr15 | 36700001 | 36800000 | 473 | 611 | 36750000 | -0.17337 | 0.014961 | 0 |
| chr15 | 37300001 | 37400000 | 603 | 628 | 37350000 | 0.137356 | 0.041406 | 0 |
| chr15 | 37850001 | 37950000 | 425 | 548 | 37900000 | -0.17075 | 0.016233 | 0 |
| chr15 | 38050001 | 38150000 | 452 | 574 | 38100000 | -0.14876 | 0.031054 | 0 |
| chr15 | 38150001 | 38250000 | 465 | 591 | 38200000 | -0.14996 | 0.030024 | 0 |
| chr15 | 38850001 | 38950000 | 592 | 617 | 38900000 | 0.13629  | 0.042613 | 0 |
| chr15 | 39750001 | 39850000 | 600 | 755 | 39800000 | -0.13555 | 0.044474 | 0 |
| chr15 | 40800001 | 40900000 | 666 | 683 | 40850000 | 0.1596   | 0.021941 | 0 |
| chr15 | 41050001 | 41150000 | 715 | 738 | 41100000 | 0.150285 | 0.028865 | 0 |
| chr15 | 41550001 | 41650000 | 551 | 576 | 41600000 | 0.131947 | 0.047826 | 0 |
| chr15 | 41900001 | 42000000 | 656 | 664 | 41950000 | 0.178476 | 0.012126 | 0 |
| chr15 | 41950001 | 42050000 | 658 | 682 | 4.20E+07 | 0.144279 | 0.03423  | 0 |
| chr15 | 42050001 | 42150000 | 790 | 810 | 42100000 | 0.159894 | 0.021747 | 0 |
| chr15 | 42400001 | 42500000 | 677 | 703 | 42450000 | 0.141594 | 0.036881 | 0 |



|       |          |          |     |     |          |          |          |   |
|-------|----------|----------|-----|-----|----------|----------|----------|---|
| chr15 | 42500001 | 42600000 | 592 | 618 | 42550000 | 0.133953 | 0.045357 | 0 |
| chr15 | 42750001 | 42850000 | 609 | 617 | 42800000 | 0.177135 | 0.012668 | 0 |
| chr15 | 42800001 | 42900000 | 619 | 625 | 42850000 | 0.182046 | 0.010778 | 0 |
| chr15 | 43150001 | 43250000 | 564 | 576 | 43200000 | 0.165589 | 0.018276 | 0 |
| chr15 | 43450001 | 43550000 | 650 | 675 | 43500000 | 0.141515 | 0.036962 | 0 |
| chr15 | 43550001 | 43650000 | 764 | 774 | 43600000 | 0.177202 | 0.012641 | 0 |
| chr15 | 43850001 | 43950000 | 119 | 121 | 43900000 | 0.171918 | 0.014985 | 0 |
| chr15 | 44500001 | 44600000 | 497 | 516 | 44550000 | 0.141838 | 0.036634 | 0 |
| chr15 | 44750001 | 44850000 | 589 | 610 | 44800000 | 0.145421 | 0.033151 | 0 |
| chr15 | 45150001 | 45250000 | 256 | 323 | 45200000 | -0.13943 | 0.040122 | 0 |
| chr15 | 45350001 | 45450000 | 594 | 609 | 45400000 | 0.159984 | 0.021688 | 0 |
| chr15 | 45850001 | 45950000 | 614 | 625 | 45900000 | 0.170346 | 0.01575  | 0 |
| chr15 | 46250001 | 46350000 | 534 | 555 | 46300000 | 0.140315 | 0.038202 | 0 |
| chr15 | 46450001 | 46550000 | 465 | 591 | 46500000 | -0.14996 | 0.030024 | 0 |
| chr15 | 47000001 | 47100000 | 414 | 535 | 47050000 | -0.17395 | 0.014694 | 0 |
| chr15 | 47400001 | 47500000 | 458 | 590 | 47450000 | -0.1694  | 0.016921 | 0 |
| chr15 | 48250001 | 48350000 | 558 | 700 | 48300000 | -0.13113 | 0.049901 | 0 |
| chr15 | 48550001 | 48650000 | 576 | 732 | 48600000 | -0.14981 | 0.030154 | 0 |
| chr15 | 49500001 | 49600000 | 536 | 682 | 49550000 | -0.15158 | 0.028685 | 0 |
| chr15 | 50200001 | 50300000 | 545 | 699 | 50250000 | -0.16307 | 0.020508 | 0 |
| chr15 | 51550001 | 51650000 | 596 | 755 | 51600000 | -0.1452  | 0.034291 | 0 |
| chr15 | 52150001 | 52250000 | 665 | 686 | 52200000 | 0.151109 | 0.028187 | 0 |
| chr15 | 53400001 | 53500000 | 441 | 567 | 53450000 | -0.16661 | 0.018434 | 0 |
| chr15 | 53700001 | 53800000 | 438 | 560 | 53750000 | -0.15853 | 0.023463 | 0 |
| chr15 | 54100001 | 54200000 | 467 | 487 | 54150000 | 0.135464 | 0.043567 | 0 |
| chr15 | 54550001 | 54650000 | 452 | 574 | 54600000 | -0.14876 | 0.031054 | 0 |
| chr15 | 55050001 | 55150000 | 471 | 597 | 55100000 | -0.14604 | 0.033504 | 0 |
| chr15 | 55200001 | 55300000 | 438 | 555 | 55250000 | -0.14559 | 0.033921 | 0 |
| chr15 | 55350001 | 55450000 | 468 | 481 | 55400000 | 0.156435 | 0.024117 | 0 |
| chr15 | 55600001 | 55700000 | 553 | 578 | 55650000 | 0.132173 | 0.047542 | 0 |
| chr15 | 56200001 | 56300000 | 552 | 569 | 56250000 | 0.152203 | 0.027307 | 0 |
| chr15 | 56300001 | 56400000 | 521 | 656 | 56350000 | -0.13645 | 0.043433 | 0 |
| chr15 | 57350001 | 57450000 | 538 | 681 | 57400000 | -0.14409 | 0.035359 | 0 |
| chr15 | 57500001 | 57600000 | 562 | 706 | 57550000 | -0.13314 | 0.047375 | 0 |
| chr15 | 58150001 | 58250000 | 576 | 730 | 58200000 | -0.14586 | 0.033668 | 0 |
| chr15 | 58350001 | 58450000 | 539 | 678 | 58400000 | -0.13504 | 0.045079 | 0 |
| chr15 | 59650001 | 59750000 | 668 | 697 | 59700000 | 0.134652 | 0.044521 | 0 |
| chr15 | 59950001 | 60050000 | 624 | 640 | 6.00E+07 | 0.159437 | 0.022048 | 0 |
| chr15 | 60100001 | 60200000 | 554 | 695 | 60150000 | -0.13116 | 0.049853 | 0 |
| chr15 | 60550001 | 60650000 | 587 | 740 | 60600000 | -0.1382  | 0.041459 | 0 |
| chr15 | 60600001 | 60700000 | 674 | 685 | 60650000 | 0.172608 | 0.014659 | 0 |
| chr15 | 60650001 | 60750000 | 653 | 668 | 60700000 | 0.163198 | 0.019671 | 0 |
| chr15 | 61200001 | 61300000 | 539 | 678 | 61250000 | -0.13504 | 0.045079 | 0 |
| chr15 | 61550001 | 61650000 | 495 | 631 | 61600000 | -0.15425 | 0.026574 | 0 |
| chr15 | 61850001 | 61950000 | 512 | 647 | 61900000 | -0.14166 | 0.037779 | 0 |
| chr15 | 62600001 | 62700000 | 610 | 616 | 62650000 | 0.181842 | 0.010852 | 0 |
| chr15 | 63250001 | 63350000 | 720 | 729 | 63300000 | 0.178041 | 0.012299 | 0 |

|       |          |          |     |     |          |          |          |   |
|-------|----------|----------|-----|-----|----------|----------|----------|---|
| chr15 | 63400001 | 63500000 | 663 | 681 | 63450000 | 0.157317 | 0.023492 | 0 |
| chr15 | 63500001 | 63600000 | 658 | 677 | 63550000 | 0.154895 | 0.025239 | 0 |
| chr15 | 63750001 | 63850000 | 714 | 732 | 63800000 | 0.160043 | 0.021649 | 0 |
| chr15 | 64300001 | 64400000 | 704 | 734 | 64350000 | 0.135758 | 0.043225 | 0 |
| chr15 | 64700001 | 64800000 | 652 | 675 | 64750000 | 0.145947 | 0.032663 | 0 |
| chr15 | 65050001 | 65150000 | 634 | 648 | 65100000 | 0.164452 | 0.018928 | 0 |
| chr15 | 65250001 | 65350000 | 677 | 684 | 65300000 | 0.181123 | 0.011114 | 0 |
| chr15 | 65350001 | 65450000 | 710 | 720 | 65400000 | 0.175785 | 0.013236 | 0 |
| chr15 | 66200001 | 66300000 | 739 | 770 | 66250000 | 0.136679 | 0.042169 | 0 |
| chr15 | 66450001 | 66550000 | 738 | 745 | 66500000 | 0.182343 | 0.010672 | 0 |
| chr15 | 66500001 | 66600000 | 766 | 786 | 66550000 | 0.158778 | 0.022489 | 0 |
| chr15 | 66700001 | 66800000 | 670 | 695 | 66750000 | 0.143111 | 0.035364 | 0 |
| chr15 | 67800001 | 67900000 | 680 | 693 | 67850000 | 0.168642 | 0.016618 | 0 |
| chr15 | 67900001 | 68000000 | 520 | 671 | 67950000 | -0.17184 | 0.015694 | 0 |
| chr15 | 68850001 | 68950000 | 734 | 763 | 68900000 | 0.14006  | 0.03847  | 0 |
| chr15 | 71300001 | 71400000 | 486 | 628 | 71350000 | -0.17385 | 0.01474  | 0 |
| chr15 | 71350001 | 71450000 | 587 | 751 | 71400000 | -0.15949 | 0.022812 | 0 |
| chr15 | 71400001 | 71500000 | 557 | 704 | 71450000 | -0.14194 | 0.037497 | 0 |
| chr15 | 71550001 | 71650000 | 649 | 671 | 71600000 | 0.147869 | 0.030933 | 0 |
| chr15 | 71750001 | 71850000 | 566 | 710 | 71800000 | -0.13105 | 0.049994 | 0 |
| chr15 | 71800001 | 71900000 | 550 | 693 | 71850000 | -0.13746 | 0.042285 | 0 |
| chr15 | 72700001 | 72800000 | 578 | 595 | 72750000 | 0.154143 | 0.025803 | 0 |
| chr15 | 72800001 | 72900000 | 628 | 634 | 72850000 | 0.182245 | 0.010707 | 0 |
| chr15 | 72950001 | 73050000 | 542 | 567 | 7.30E+07 | 0.130907 | 0.049146 | 0 |
| chr15 | 73150001 | 73250000 | 552 | 705 | 73200000 | -0.15699 | 0.024544 | 0 |
| chr15 | 73200001 | 73300000 | 569 | 726 | 73250000 | -0.15558 | 0.025574 | 0 |
| chr15 | 73250001 | 73350000 | 599 | 763 | 73300000 | -0.15316 | 0.027414 | 0 |
| chr15 | 73750001 | 73850000 | 472 | 601 | 73800000 | -0.15262 | 0.027848 | 0 |
| chr15 | 73850001 | 73950000 | 663 | 686 | 73900000 | 0.146763 | 0.031919 | 0 |
| chr15 | 74600001 | 74700000 | 745 | 777 | 74650000 | 0.135289 | 0.043772 | 0 |
| chr15 | 74650001 | 74750000 | 821 | 838 | 74700000 | 0.166395 | 0.017825 | 0 |
| chr15 | 74800001 | 74900000 | 689 | 711 | 74850000 | 0.150617 | 0.02859  | 0 |
| chr15 | 74850001 | 74950000 | 830 | 862 | 74900000 | 0.141387 | 0.037093 | 0 |
| chr15 | 75400001 | 75500000 | 694 | 702 | 75450000 | 0.179428 | 0.011753 | 0 |
| chr15 | 75500001 | 75600000 | 353 | 361 | 75550000 | 0.163632 | 0.019411 | 0 |
| chr15 | 76150001 | 76250000 | 647 | 668 | 76200000 | 0.149881 | 0.029203 | 0 |
| chr15 | 76350001 | 76450000 | 572 | 731 | 76400000 | -0.15789 | 0.023907 | 0 |
| chr15 | 76900001 | 77000000 | 263 | 340 | 76950000 | -0.17451 | 0.014436 | 0 |
| chr15 | 76950001 | 77050000 | 338 | 426 | 7.70E+07 | -0.13787 | 0.04183  | 0 |
| chr15 | 77150001 | 77250000 | 623 | 638 | 77200000 | 0.161639 | 0.020629 | 0 |
| chr15 | 78000001 | 78100000 | 820 | 849 | 78050000 | 0.145822 | 0.032779 | 0 |
| chr15 | 78200001 | 78300000 | 345 | 352 | 78250000 | 0.166984 | 0.017502 | 0 |
| chr15 | 78350001 | 78450000 | 725 | 751 | 78400000 | 0.145131 | 0.033423 | 0 |
| chr15 | 78800001 | 78900000 | 633 | 644 | 78850000 | 0.171108 | 0.015375 | 0 |
| chr15 | 79100001 | 79200000 | 575 | 590 | 79150000 | 0.15881  | 0.022467 | 0 |
| chr15 | 79550001 | 79650000 | 617 | 638 | 79600000 | 0.147677 | 0.031102 | 0 |
| chr15 | 79750001 | 79850000 | 582 | 605 | 79800000 | 0.140047 | 0.038484 | 0 |

|       |          |          |     |     |          |          |          |   |
|-------|----------|----------|-----|-----|----------|----------|----------|---|
| chr15 | 80850001 | 80950000 | 806 | 813 | 80900000 | 0.183488 | 0.010272 | 0 |
| chr15 | 80950001 | 81050000 | 719 | 743 | 8.10E+07 | 0.148593 | 0.030301 | 0 |
| chr15 | 81550001 | 81650000 | 686 | 711 | 81600000 | 0.144322 | 0.034189 | 0 |
| chr15 | 81950001 | 82050000 | 394 | 406 | 8.20E+07 | 0.152679 | 0.026931 | 0 |
| chr15 | 83150001 | 83250000 | 265 | 270 | 83200000 | 0.168996 | 0.016435 | 0 |
| chr15 | 83250001 | 83350000 | 673 | 703 | 83300000 | 0.133045 | 0.046461 | 0 |
| chr15 | 83300001 | 83400000 | 659 | 684 | 83350000 | 0.142245 | 0.036224 | 0 |
| chr15 | 84500001 | 84600000 | 458 | 596 | 84550000 | -0.184   | 0.010644 | 0 |
| chr15 | 85050001 | 85150000 | 253 | 259 | 85100000 | 0.162148 | 0.020312 | 0 |
| chr15 | 85750001 | 85850000 | 206 | 209 | 85800000 | 0.175104 | 0.01353  | 0 |
| chr15 | 85800001 | 85900000 | 482 | 504 | 85850000 | 0.131572 | 0.048298 | 0 |
| chr15 | 86800001 | 86900000 | 493 | 624 | 86850000 | -0.144   | 0.035447 | 0 |
| chr15 | 87150001 | 87250000 | 484 | 615 | 87200000 | -0.14962 | 0.03032  | 0 |
| chr15 | 87200001 | 87300000 | 458 | 576 | 87250000 | -0.13476 | 0.04541  | 0 |
| chr15 | 87500001 | 87600000 | 383 | 495 | 87550000 | -0.17412 | 0.014613 | 0 |
| chr15 | 88000001 | 88100000 | 406 | 522 | 88050000 | -0.16661 | 0.018434 | 0 |
| chr15 | 88900001 | 89000000 | 573 | 719 | 88950000 | -0.13149 | 0.049432 | 0 |
| chr15 | 89500001 | 89600000 | 529 | 548 | 89550000 | 0.145055 | 0.033494 | 0 |
| chr15 | 89550001 | 89650000 | 607 | 633 | 89600000 | 0.135454 | 0.043579 | 0 |
| chr15 | 89950001 | 90050000 | 774 | 807 | 9.00E+07 | 0.135728 | 0.04326  | 0 |
| chr15 | 90300001 | 90400000 | 738 | 750 | 90350000 | 0.172693 | 0.014619 | 0 |
| chr15 | 90550001 | 90650000 | 755 | 763 | 90600000 | 0.180757 | 0.011249 | 0 |
| chr15 | 90600001 | 90700000 | 638 | 664 | 90650000 | 0.138336 | 0.040322 | 0 |
| chr15 | 90800001 | 90900000 | 594 | 610 | 90850000 | 0.157617 | 0.023284 | 0 |
| chr15 | 91200001 | 91300000 | 652 | 677 | 91250000 | 0.141679 | 0.036795 | 0 |
| chr15 | 91300001 | 91400000 | 599 | 622 | 91350000 | 0.141604 | 0.036871 | 0 |
| chr15 | 91500001 | 91600000 | 666 | 697 | 91550000 | 0.130327 | 0.049896 | 0 |
| chr15 | 92800001 | 92900000 | 649 | 676 | 92850000 | 0.137158 | 0.041628 | 0 |
| chr15 | 93450001 | 93550000 | 699 | 723 | 93500000 | 0.14726  | 0.031473 | 0 |
| chr15 | 93550001 | 93650000 | 711 | 719 | 93600000 | 0.179821 | 0.011602 | 0 |
| chr15 | 94150001 | 94250000 | 451 | 586 | 94200000 | -0.18181 | 0.011432 | 0 |
| chr15 | 94550001 | 94650000 | 519 | 652 | 94600000 | -0.13317 | 0.047327 | 0 |
| chr15 | 94650001 | 94750000 | 446 | 568 | 94700000 | -0.15288 | 0.027635 | 0 |
| chr15 | 94800001 | 94900000 | 463 | 597 | 94850000 | -0.17076 | 0.01623  | 0 |
| chr15 | 95050001 | 95150000 | 497 | 639 | 95100000 | -0.16661 | 0.018434 | 0 |
| chr15 | 95300001 | 95400000 | 432 | 544 | 95350000 | -0.13661 | 0.043246 | 0 |
| chr15 | 95750001 | 95850000 | 470 | 608 | 95800000 | -0.17545 | 0.014015 | 0 |
| chr15 | 96350001 | 96450000 | 241 | 308 | 96400000 | -0.15793 | 0.023878 | 0 |
| chr15 | 96700001 | 96800000 | 446 | 578 | 96750000 | -0.17806 | 0.012898 | 0 |
| chr15 | 96800001 | 96900000 | 649 | 673 | 96850000 | 0.143575 | 0.03491  | 0 |
| chr15 | 97050001 | 97150000 | 494 | 629 | 97100000 | -0.15259 | 0.027871 | 0 |
| chr15 | 97800001 | 97900000 | 380 | 482 | 97850000 | -0.14707 | 0.03256  | 0 |
| chr15 | 98600001 | 98700000 | 478 | 602 | 98650000 | -0.13679 | 0.043044 | 0 |
| chr15 | 99350001 | 99450000 | 738 | 762 | 99400000 | 0.149793 | 0.029277 | 0 |
| chr15 | 99400001 | 99500000 | 781 | 795 | 99450000 | 0.170331 | 0.015758 | 0 |
| chr15 | 99500001 | 99600000 | 615 | 643 | 99550000 | 0.131731 | 0.048097 | 0 |
| chr15 | 99600001 | 99700000 | 718 | 750 | 99650000 | 0.133056 | 0.046447 | 0 |

|       |          |          |      |      |          |          |          |   |
|-------|----------|----------|------|------|----------|----------|----------|---|
| chr15 | 99650001 | 99750000 | 676  | 701  | 99700000 | 0.143572 | 0.034913 | 0 |
| chr15 | 1E+08    | 1E+08    | 442  | 556  | 1E+08    | -0.13508 | 0.045033 | 0 |
| chr15 | 1.01E+08 | 1.01E+08 | 461  | 589  | 1.01E+08 | -0.15754 | 0.024157 | 0 |
| chr15 | 1.01E+08 | 1.01E+08 | 581  | 747  | 1.01E+08 | -0.16661 | 0.018434 | 0 |
| chr15 | 1.02E+08 | 1.02E+08 | 680  | 696  | 1.02E+08 | 0.16241  | 0.02015  | 0 |
| chr16 | 50001    | 150000   | 737  | 729  | 1.00E+05 | 0.211709 | 0.003778 | 0 |
| chr16 | 100001   | 200000   | 1084 | 1036 | 150000   | 0.261304 | 0.000495 | 0 |
| chr16 | 250001   | 350000   | 1023 | 991  | 3.00E+05 | 0.241812 | 0.001148 | 0 |
| chr16 | 350001   | 450000   | 1091 | 1097 | 4.00E+05 | 0.188051 | 0.008805 | 0 |
| chr16 | 400001   | 500000   | 1069 | 983  | 450000   | 0.316962 | 3.34E-05 | 0 |
| chr16 | 450001   | 550000   | 941  | 874  | 5.00E+05 | 0.302524 | 7.02E-05 | 0 |
| chr16 | 500001   | 600000   | 1068 | 986  | 550000   | 0.311215 | 4.51E-05 | 0 |
| chr16 | 550001   | 650000   | 1240 | 1145 | 6.00E+05 | 0.310956 | 4.57E-05 | 0 |
| chr16 | 600001   | 700000   | 1231 | 1111 | 650000   | 0.343935 | 7.75E-06 | 0 |
| chr16 | 650001   | 750000   | 1312 | 1153 | 7.00E+05 | 0.382338 | 8.13E-07 | 0 |
| chr16 | 700001   | 800000   | 1425 | 1145 | 750000   | 0.511577 | 9.91E-11 | 0 |
| chr16 | 750001   | 850000   | 1371 | 1082 | 8.00E+05 | 0.537491 | 1.27E-11 | 0 |
| chr16 | 800001   | 900000   | 1284 | 1164 | 850000   | 0.337517 | 1.11E-05 | 0 |
| chr16 | 850001   | 950000   | 1200 | 1201 | 9.00E+05 | 0.194761 | 0.006982 | 0 |
| chr16 | 1100001  | 1200000  | 1341 | 1285 | 1150000  | 0.257504 | 0.000586 | 0 |
| chr16 | 1150001  | 1250000  | 1398 | 1300 | 1200000  | 0.300816 | 7.65E-05 | 0 |
| chr16 | 1200001  | 1300000  | 1102 | 1060 | 1250000  | 0.252023 | 0.000744 | 0 |
| chr16 | 1250001  | 1350000  | 886  | 882  | 1300000  | 0.202491 | 0.005303 | 0 |
| chr16 | 1300001  | 1400000  | 1118 | 1040 | 1350000  | 0.3003   | 7.85E-05 | 0 |
| chr16 | 1350001  | 1450000  | 1187 | 1114 | 1400000  | 0.287534 | 0.000147 | 0 |
| chr16 | 1400001  | 1500000  | 1136 | 1090 | 1450000  | 0.255598 | 0.000637 | 0 |
| chr16 | 1450001  | 1550000  | 1197 | 1121 | 1500000  | 0.2906   | 0.000127 | 0 |
| chr16 | 1500001  | 1600000  | 1140 | 1146 | 1550000  | 0.18839  | 0.008704 | 0 |
| chr16 | 1700001  | 1800000  | 1103 | 1109 | 1750000  | 0.188136 | 0.00878  | 0 |
| chr16 | 1750001  | 1850000  | 1185 | 1096 | 1800000  | 0.308602 | 5.15E-05 | 0 |
| chr16 | 1800001  | 1900000  | 1095 | 1065 | 1850000  | 0.23604  | 0.001457 | 0 |
| chr16 | 1900001  | 2000000  | 981  | 940  | 1950000  | 0.257555 | 0.000585 | 0 |
| chr16 | 1950001  | 2050000  | 1210 | 1057 | 2.00E+06 | 0.390995 | 4.76E-07 | 0 |
| chr16 | 2000001  | 2100000  | 1227 | 1092 | 2050000  | 0.364125 | 2.43E-06 | 0 |
| chr16 | 2050001  | 2150000  | 1214 | 1172 | 2100000  | 0.246759 | 0.000932 | 0 |
| chr16 | 2100001  | 2200000  | 794  | 772  | 2150000  | 0.236501 | 0.001429 | 0 |
| chr16 | 2150001  | 2250000  | 886  | 846  | 2200000  | 0.262612 | 0.000467 | 0 |
| chr16 | 2200001  | 2300000  | 1298 | 1150 | 2250000  | 0.37062  | 1.65E-06 | 0 |
| chr16 | 2250001  | 2350000  | 1128 | 986  | 2300000  | 0.390071 | 5.04E-07 | 0 |
| chr16 | 2300001  | 2400000  | 1001 | 972  | 2350000  | 0.238377 | 0.001323 | 0 |
| chr16 | 2450001  | 2550000  | 1080 | 1070 | 2500000  | 0.209384 | 0.00412  | 0 |
| chr16 | 2500001  | 2600000  | 1073 | 1038 | 2550000  | 0.243807 | 0.001056 | 0 |
| chr16 | 2550001  | 2650000  | 632  | 630  | 2600000  | 0.200536 | 0.00569  | 0 |
| chr16 | 2600001  | 2700000  | 258  | 248  | 2650000  | 0.252994 | 0.000713 | 0 |
| chr16 | 2650001  | 2750000  | 320  | 290  | 2700000  | 0.337982 | 1.08E-05 | 0 |
| chr16 | 2800001  | 2900000  | 1291 | 1208 | 2850000  | 0.291832 | 0.000119 | 0 |
| chr16 | 2850001  | 2950000  | 1142 | 1049 | 2900000  | 0.318511 | 3.08E-05 | 0 |

|       |          |          |      |      |          |          |          |   |
|-------|----------|----------|------|------|----------|----------|----------|---|
| chr16 | 2900001  | 3000000  | 996  | 952  | 2950000  | 0.261147 | 0.000499 | 0 |
| chr16 | 2950001  | 3050000  | 1116 | 1094 | 3.00E+06 | 0.224687 | 0.002296 | 0 |
| chr16 | 3000001  | 3100000  | 1224 | 1166 | 3050000  | 0.265999 | 0.000401 | 0 |
| chr16 | 3050001  | 3150000  | 1026 | 988  | 3100000  | 0.250411 | 0.000797 | 0 |
| chr16 | 3100001  | 3200000  | 1043 | 1009 | 3150000  | 0.243776 | 0.001057 | 0 |
| chr16 | 3150001  | 3250000  | 1103 | 1065 | 3200000  | 0.246542 | 0.00094  | 0 |
| chr16 | 3250001  | 3350000  | 991  | 989  | 3300000  | 0.198878 | 0.006037 | 0 |
| chr16 | 3550001  | 3650000  | 1049 | 1057 | 3600000  | 0.185002 | 0.009763 | 0 |
| chr16 | 3650001  | 3750000  | 1008 | 1010 | 3700000  | 0.193103 | 0.007399 | 0 |
| chr16 | 3700001  | 3800000  | 994  | 964  | 3750000  | 0.240176 | 0.001228 | 0 |
| chr16 | 4150001  | 4250000  | 971  | 977  | 4200000  | 0.187076 | 0.009102 | 0 |
| chr16 | 4250001  | 4350000  | 1035 | 1020 | 4300000  | 0.217025 | 0.00309  | 0 |
| chr16 | 4300001  | 4400000  | 1086 | 994  | 4350000  | 0.323669 | 2.35E-05 | 0 |
| chr16 | 4350001  | 4450000  | 1190 | 1130 | 4400000  | 0.270602 | 0.000325 | 0 |
| chr16 | 4400001  | 4500000  | 1080 | 1065 | 4450000  | 0.216141 | 0.003196 | 0 |
| chr16 | 4450001  | 4550000  | 980  | 952  | 4500000  | 0.237783 | 0.001356 | 0 |
| chr16 | 4500001  | 4600000  | 1076 | 1034 | 4550000  | 0.253405 | 0.000701 | 0 |
| chr16 | 4650001  | 4750000  | 1159 | 1034 | 4700000  | 0.360607 | 2.99E-06 | 0 |
| chr16 | 4700001  | 4800000  | 1173 | 1065 | 4750000  | 0.335313 | 1.25E-05 | 0 |
| chr16 | 4950001  | 5050000  | 1032 | 998  | 5.00E+06 | 0.244294 | 0.001034 | 0 |
| chr16 | 5950001  | 6050000  | 666  | 895  | 6.00E+06 | -0.2304  | 0.00202  | 0 |
| chr16 | 6050001  | 6150000  | 688  | 902  | 6100000  | -0.19476 | 0.007429 | 0 |
| chr16 | 11400001 | 11500000 | 1016 | 983  | 11450000 | 0.2436   | 0.001065 | 0 |
| chr16 | 11800001 | 11900000 | 999  | 982  | 11850000 | 0.220725 | 0.00268  | 0 |
| chr16 | 11850001 | 11950000 | 905  | 901  | 11900000 | 0.202354 | 0.00533  | 0 |
| chr16 | 11900001 | 12000000 | 847  | 834  | 11950000 | 0.218278 | 0.002945 | 0 |
| chr16 | 11950001 | 12050000 | 706  | 691  | 1.20E+07 | 0.226946 | 0.0021   | 0 |
| chr16 | 14750001 | 14850000 | 226  | 298  | 14800000 | -0.20303 | 0.005575 | 0 |
| chr16 | 14800001 | 14900000 | 4    | 8    | 14850000 | -0.80404 | 3.29E-21 | 0 |
| chr16 | 14850001 | 14950000 | 16   | 24   | 14900000 | -0.389   | 8.31E-07 | 0 |
| chr16 | 14900001 | 15000000 | 35   | 35   | 14950000 | 0.195963 | 0.006694 | 0 |
| chr16 | 14950001 | 15050000 | 66   | 47   | 1.50E+07 | 0.685768 | 2.34E-17 | 0 |
| chr16 | 15000001 | 15100000 | 291  | 270  | 15050000 | 0.304023 | 6.51E-05 | 0 |
| chr16 | 15150001 | 15250000 | 209  | 200  | 15200000 | 0.259466 | 0.000537 | 0 |
| chr16 | 15250001 | 15350000 | 46   | 34   | 15300000 | 0.632062 | 3.65E-15 | 0 |
| chr16 | 15300001 | 15400000 | 27   | 21   | 15350000 | 0.558533 | 2.25E-12 | 0 |
| chr16 | 15350001 | 15450000 | 21   | 28   | 15400000 | -0.21907 | 0.003112 | 0 |
| chr16 | 15650001 | 15750000 | 993  | 938  | 15700000 | 0.278169 | 0.000229 | 0 |
| chr16 | 15700001 | 15800000 | 970  | 911  | 15750000 | 0.286497 | 0.000154 | 0 |
| chr16 | 16100001 | 16200000 | 994  | 970  | 16150000 | 0.231224 | 0.001771 | 0 |
| chr16 | 16150001 | 16250000 | 1009 | 1011 | 16200000 | 0.193106 | 0.007398 | 0 |
| chr16 | 16300001 | 16400000 | 25   | 20   | 16350000 | 0.517891 | 6.05E-11 | 0 |
| chr16 | 16350001 | 16450000 | 4    | 7    | 16400000 | -0.61139 | 1.08E-13 | 0 |
| chr16 | 16400001 | 16500000 | 3    | 4    | 16450000 | -0.21907 | 0.003112 | 0 |
| chr16 | 16450001 | 16550000 | 9    | 7    | 16500000 | 0.558533 | 2.25E-12 | 0 |
| chr16 | 16500001 | 16600000 | 11   | 11   | 16550000 | 0.195963 | 0.006694 | 0 |
| chr16 | 16550001 | 16650000 | 30   | 24   | 16600000 | 0.517891 | 6.05E-11 | 0 |

|       |          |          |      |      |          |          |          |   |
|-------|----------|----------|------|------|----------|----------|----------|---|
| chr16 | 16600001 | 16700000 | 74   | 67   | 16650000 | 0.339327 | 1.00E-05 | 0 |
| chr16 | 16650001 | 16750000 | 124  | 163  | 16700000 | -0.19857 | 0.006515 | 0 |
| chr16 | 16700001 | 16800000 | 80   | 124  | 16750000 | -0.43631 | 4.46E-08 | 0 |
| chr16 | 16750001 | 16850000 | 6    | 12   | 16800000 | -0.80404 | 3.29E-21 | 0 |
| chr16 | 17900001 | 18000000 | 705  | 925  | 17950000 | -0.19587 | 0.007151 | 0 |
| chr16 | 18600001 | 18700000 | 39   | 36   | 18650000 | 0.31144  | 4.46E-05 | 0 |
| chr16 | 18650001 | 18750000 | 27   | 15   | 18700000 | 1.04396  | 1.94E-34 | 0 |
| chr16 | 18700001 | 18800000 | 115  | 107  | 18750000 | 0.299986 | 7.97E-05 | 0 |
| chr16 | 18750001 | 18850000 | 495  | 490  | 18800000 | 0.21061  | 0.003936 | 0 |
| chr16 | 18800001 | 18900000 | 615  | 614  | 18850000 | 0.198311 | 0.00616  | 0 |
| chr16 | 18850001 | 18950000 | 359  | 351  | 18900000 | 0.228476 | 0.001977 | 0 |
| chr16 | 18900001 | 19000000 | 518  | 483  | 18950000 | 0.296892 | 9.30E-05 | 0 |
| chr16 | 19050001 | 19150000 | 997  | 984  | 19100000 | 0.214898 | 0.00335  | 0 |
| chr16 | 19100001 | 19200000 | 1077 | 1041 | 19150000 | 0.245011 | 0.001003 | 0 |
| chr16 | 20450001 | 20550000 | 163  | 236  | 20500000 | -0.33795 | 1.45E-05 | 0 |
| chr16 | 20500001 | 20600000 | 180  | 241  | 20550000 | -0.22507 | 0.002481 | 0 |
| chr16 | 21300001 | 21400000 | 463  | 463  | 21350000 | 0.195963 | 0.006694 | 0 |
| chr16 | 21400001 | 21500000 | 8    | 2    | 21450000 | 2.195963 | 8.22E-92 | 0 |
| chr16 | 21450001 | 21550000 | 114  | 103  | 21500000 | 0.342353 | 8.47E-06 | 0 |
| chr16 | 21550001 | 21650000 | 906  | 907  | 21600000 | 0.194372 | 0.007078 | 0 |
| chr16 | 21750001 | 21850000 | 44   | 37   | 21800000 | 0.445941 | 1.26E-08 | 0 |
| chr16 | 21800001 | 21900000 | 32   | 27   | 21850000 | 0.441076 | 1.76E-08 | 0 |
| chr16 | 22300001 | 22400000 | 1055 | 1014 | 22350000 | 0.253148 | 0.000709 | 0 |
| chr16 | 22350001 | 22450000 | 828  | 781  | 22400000 | 0.280271 | 0.000208 | 0 |
| chr16 | 22400001 | 22500000 | 331  | 329  | 22450000 | 0.204707 | 0.004893 | 0 |
| chr16 | 22450001 | 22550000 | 8    | 8    | 22500000 | 0.195963 | 0.006694 | 0 |
| chr16 | 22500001 | 22600000 | 27   | 40   | 22550000 | -0.37108 | 2.35E-06 | 0 |
| chr16 | 23450001 | 23550000 | 922  | 901  | 23500000 | 0.229203 | 0.00192  | 0 |
| chr16 | 23500001 | 23600000 | 963  | 937  | 23550000 | 0.23545  | 0.001492 | 0 |
| chr16 | 24200001 | 24300000 | 981  | 964  | 24250000 | 0.221183 | 0.002633 | 0 |
| chr16 | 26150001 | 26250000 | 668  | 908  | 26200000 | -0.24688 | 0.001045 | 0 |
| chr16 | 26200001 | 26300000 | 662  | 904  | 26250000 | -0.25353 | 0.000793 | 0 |
| chr16 | 26800001 | 26900000 | 729  | 951  | 26850000 | -0.18756 | 0.009465 | 0 |
| chr16 | 26850001 | 26950000 | 707  | 924  | 26900000 | -0.19022 | 0.008662 | 0 |
| chr16 | 28300001 | 28400000 | 444  | 446  | 28350000 | 0.189479 | 0.008386 | 0 |
| chr16 | 28350001 | 28450000 | 3    | 5    | 28400000 | -0.541   | 2.84E-11 | 0 |
| chr16 | 28450001 | 28550000 | 662  | 662  | 28500000 | 0.195963 | 0.006694 | 0 |
| chr16 | 28650001 | 28750000 | 6    | 3    | 28700000 | 1.195963 | 1.84E-42 | 0 |
| chr16 | 28700001 | 28800000 | 4    | 2    | 28750000 | 1.195963 | 1.84E-42 | 0 |
| chr16 | 28800001 | 28900000 | 779  | 706  | 28850000 | 0.337918 | 1.08E-05 | 0 |
| chr16 | 28850001 | 28950000 | 992  | 925  | 28900000 | 0.29685  | 9.31E-05 | 0 |
| chr16 | 29100001 | 29200000 | 252  | 242  | 29150000 | 0.25438  | 0.000672 | 0 |
| chr16 | 29150001 | 29250000 | 263  | 234  | 29200000 | 0.364517 | 2.37E-06 | 0 |
| chr16 | 29200001 | 29300000 | 200  | 196  | 29250000 | 0.225109 | 0.002258 | 0 |
| chr16 | 29350001 | 29450000 | 42   | 39   | 29400000 | 0.302878 | 6.89E-05 | 0 |
| chr16 | 29400001 | 29500000 | 27   | 22   | 29450000 | 0.491419 | 4.64E-10 | 0 |
| chr16 | 29450001 | 29550000 | 7    | 10   | 29500000 | -0.31861 | 3.93E-05 | 0 |

|       |          |          |      |      |          |          |          |   |
|-------|----------|----------|------|------|----------|----------|----------|---|
| chr16 | 29500001 | 29600000 | 15   | 23   | 29550000 | -0.42071 | 1.20E-07 | 0 |
| chr16 | 29800001 | 29900000 | 1072 | 1074 | 29850000 | 0.193274 | 0.007355 | 0 |
| chr16 | 29900001 | 30000000 | 992  | 981  | 29950000 | 0.21205  | 0.00373  | 0 |
| chr16 | 29950001 | 30050000 | 1087 | 1035 | 3.00E+07 | 0.266684 | 0.000389 | 0 |
| chr16 | 30000001 | 30100000 | 1112 | 1117 | 30050000 | 0.189491 | 0.008382 | 0 |
| chr16 | 30050001 | 30150000 | 1052 | 1035 | 30100000 | 0.219467 | 0.002813 | 0 |
| chr16 | 30200001 | 30300000 | 3    | 12   | 30250000 | -1.80404 | 2.39E-66 | 0 |
| chr16 | 30400001 | 30500000 | 925  | 911  | 30450000 | 0.217965 | 0.002981 | 0 |
| chr16 | 30500001 | 30600000 | 948  | 887  | 30550000 | 0.291916 | 0.000119 | 0 |
| chr16 | 30550001 | 30650000 | 932  | 848  | 30600000 | 0.332229 | 1.48E-05 | 0 |
| chr16 | 30600001 | 30700000 | 927  | 918  | 30650000 | 0.210038 | 0.004021 | 0 |
| chr16 | 30700001 | 30800000 | 1126 | 1113 | 30750000 | 0.212716 | 0.003638 | 0 |
| chr16 | 30750001 | 30850000 | 1024 | 1029 | 30800000 | 0.188936 | 0.008543 | 0 |
| chr16 | 30800001 | 30900000 | 859  | 843  | 30850000 | 0.223089 | 0.002445 | 0 |
| chr16 | 30850001 | 30950000 | 973  | 894  | 30900000 | 0.318128 | 3.15E-05 | 0 |
| chr16 | 30900001 | 31000000 | 1101 | 1026 | 30950000 | 0.297747 | 8.91E-05 | 0 |
| chr16 | 30950001 | 31050000 | 1117 | 1049 | 3.10E+07 | 0.286578 | 0.000154 | 0 |
| chr16 | 31000001 | 31100000 | 1049 | 999  | 31050000 | 0.266421 | 0.000394 | 0 |
| chr16 | 31050001 | 31150000 | 1029 | 998  | 31100000 | 0.240094 | 0.001233 | 0 |
| chr16 | 31100001 | 31200000 | 986  | 975  | 31150000 | 0.212148 | 0.003716 | 0 |
| chr16 | 31150001 | 31250000 | 947  | 954  | 31200000 | 0.185338 | 0.009653 | 0 |
| chr16 | 31450001 | 31550000 | 987  | 952  | 31500000 | 0.248052 | 0.000882 | 0 |
| chr16 | 32000001 | 32100000 | 27   | 41   | 32050000 | -0.4067  | 2.87E-07 | 0 |
| chr16 | 32050001 | 32150000 | 26   | 52   | 32100000 | -0.80404 | 3.29E-21 | 0 |
| chr16 | 32100001 | 32200000 | 33   | 48   | 32150000 | -0.34461 | 1.02E-05 | 0 |
| chr16 | 32150001 | 32250000 | 22   | 22   | 32200000 | 0.195963 | 0.006694 | 0 |
| chr16 | 32200001 | 32300000 | 32   | 31   | 32250000 | 0.241767 | 0.00115  | 0 |
| chr16 | 32250001 | 32350000 | 42   | 34   | 32300000 | 0.500818 | 2.27E-10 | 0 |
| chr16 | 32350001 | 32450000 | 55   | 78   | 32400000 | -0.30808 | 6.62E-05 | 0 |
| chr16 | 32400001 | 32500000 | 76   | 102  | 32450000 | -0.22853 | 0.002172 | 0 |
| chr16 | 32750001 | 32850000 | 57   | 55   | 32800000 | 0.247493 | 0.000903 | 0 |
| chr16 | 32850001 | 32950000 | 29   | 28   | 32900000 | 0.246589 | 0.000939 | 0 |
| chr16 | 32900001 | 33000000 | 16   | 14   | 32950000 | 0.388608 | 5.52E-07 | 0 |
| chr16 | 33350001 | 33450000 | 89   | 126  | 33400000 | -0.30558 | 7.48E-05 | 0 |
| chr16 | 33400001 | 33500000 | 87   | 132  | 33450000 | -0.40549 | 3.09E-07 | 0 |
| chr16 | 33450001 | 33550000 | 122  | 189  | 33500000 | -0.43554 | 4.68E-08 | 0 |
| chr16 | 33500001 | 33600000 | 196  | 274  | 33550000 | -0.28736 | 0.000178 | 0 |
| chr16 | 33600001 | 33700000 | 154  | 202  | 33650000 | -0.19546 | 0.007252 | 0 |
| chr16 | 33750001 | 33850000 | 68   | 64   | 33800000 | 0.283426 | 0.000179 | 0 |
| chr16 | 34000001 | 34100000 | 221  | 307  | 34050000 | -0.27823 | 0.00027  | 0 |
| chr16 | 34200001 | 34300000 | 555  | 729  | 34250000 | -0.19747 | 0.006768 | 0 |
| chr16 | 34250001 | 34350000 | 484  | 683  | 34300000 | -0.30092 | 9.38E-05 | 0 |
| chr16 | 34300001 | 34400000 | 432  | 585  | 34350000 | -0.24144 | 0.001304 | 0 |
| chr16 | 35000001 | 35100000 | 544  | 719  | 35050000 | -0.20642 | 0.004942 | 0 |
| chr16 | 35050001 | 35150000 | 527  | 692  | 35100000 | -0.19701 | 0.006877 | 0 |
| chr16 | 46800001 | 46900000 | 904  | 909  | 46850000 | 0.188006 | 0.008819 | 0 |
| chr16 | 47200001 | 47300000 | 650  | 849  | 47250000 | -0.18936 | 0.008915 | 0 |

|       |          |          |      |      |          |          |          |   |
|-------|----------|----------|------|------|----------|----------|----------|---|
| chr16 | 47900001 | 48000000 | 727  | 955  | 47950000 | -0.19758 | 0.006741 | 0 |
| chr16 | 48850001 | 48950000 | 782  | 1040 | 48900000 | -0.21538 | 0.00357  | 0 |
| chr16 | 48900001 | 49000000 | 752  | 992  | 48950000 | -0.20364 | 0.005455 | 0 |
| chr16 | 51400001 | 51500000 | 638  | 844  | 51450000 | -0.20772 | 0.004717 | 0 |
| chr16 | 52300001 | 52400000 | 599  | 808  | 52350000 | -0.23584 | 0.001632 | 0 |
| chr16 | 52350001 | 52450000 | 598  | 788  | 52400000 | -0.20209 | 0.005762 | 0 |
| chr16 | 53450001 | 53550000 | 823  | 827  | 53500000 | 0.188968 | 0.008534 | 0 |
| chr16 | 56600001 | 56700000 | 1007 | 980  | 56650000 | 0.235173 | 0.001509 | 0 |
| chr16 | 56650001 | 56750000 | 1035 | 986  | 56700000 | 0.265934 | 0.000402 | 0 |
| chr16 | 57300001 | 57400000 | 994  | 993  | 57350000 | 0.197415 | 0.006359 | 0 |
| chr16 | 57350001 | 57450000 | 1020 | 988  | 57400000 | 0.241949 | 0.001141 | 0 |
| chr16 | 57550001 | 57650000 | 1131 | 1105 | 57600000 | 0.229516 | 0.001896 | 0 |
| chr16 | 57600001 | 57700000 | 1239 | 1178 | 57650000 | 0.2688   | 0.000353 | 0 |
| chr16 | 57700001 | 57800000 | 1203 | 1195 | 57750000 | 0.205589 | 0.004738 | 0 |
| chr16 | 57750001 | 57850000 | 1226 | 1216 | 57800000 | 0.207779 | 0.004372 | 0 |
| chr16 | 58600001 | 58700000 | 808  | 814  | 58650000 | 0.18529  | 0.009669 | 0 |
| chr16 | 59450001 | 59550000 | 571  | 790  | 59500000 | -0.2724  | 0.000351 | 0 |
| chr16 | 59500001 | 59600000 | 521  | 681  | 59550000 | -0.19041 | 0.008607 | 0 |
| chr16 | 59700001 | 59800000 | 567  | 781  | 59750000 | -0.26601 | 0.000465 | 0 |
| chr16 | 59750001 | 59850000 | 542  | 714  | 59800000 | -0.20167 | 0.005848 | 0 |
| chr16 | 60050001 | 60150000 | 564  | 778  | 60100000 | -0.26811 | 0.000424 | 0 |
| chr16 | 60100001 | 60200000 | 546  | 736  | 60150000 | -0.23484 | 0.001698 | 0 |
| chr16 | 60600001 | 60700000 | 616  | 832  | 60650000 | -0.23769 | 0.001516 | 0 |
| chr16 | 60650001 | 60750000 | 614  | 802  | 60700000 | -0.1894  | 0.008903 | 0 |
| chr16 | 60850001 | 60950000 | 541  | 710  | 60900000 | -0.19623 | 0.007064 | 0 |
| chr16 | 61100001 | 61200000 | 597  | 797  | 61150000 | -0.22089 | 0.002908 | 0 |
| chr16 | 61150001 | 61250000 | 604  | 837  | 61200000 | -0.27472 | 0.000317 | 0 |
| chr16 | 61200001 | 61300000 | 601  | 808  | 61250000 | -0.23103 | 0.001972 | 0 |
| chr16 | 62350001 | 62450000 | 595  | 778  | 62400000 | -0.19092 | 0.008461 | 0 |
| chr16 | 62700001 | 62800000 | 607  | 801  | 62750000 | -0.20414 | 0.005359 | 0 |
| chr16 | 62750001 | 62850000 | 591  | 816  | 62800000 | -0.26945 | 0.0004   | 0 |
| chr16 | 62800001 | 62900000 | 608  | 807  | 62850000 | -0.21253 | 0.003963 | 0 |
| chr16 | 63300001 | 63400000 | 597  | 779  | 63350000 | -0.18793 | 0.009351 | 0 |
| chr16 | 63900001 | 64000000 | 610  | 811  | 63950000 | -0.21493 | 0.00363  | 0 |
| chr16 | 63950001 | 64050000 | 603  | 824  | 6.40E+07 | -0.25452 | 0.000761 | 0 |
| chr16 | 64100001 | 64200000 | 552  | 732  | 64150000 | -0.21121 | 0.004159 | 0 |
| chr16 | 64400001 | 64500000 | 571  | 787  | 64450000 | -0.26691 | 0.000447 | 0 |
| chr16 | 64450001 | 64550000 | 570  | 763  | 64500000 | -0.22476 | 0.002511 | 0 |
| chr16 | 65700001 | 65800000 | 670  | 874  | 65750000 | -0.18751 | 0.009482 | 0 |
| chr16 | 65800001 | 65900000 | 687  | 914  | 65850000 | -0.21592 | 0.003499 | 0 |
| chr16 | 66500001 | 66600000 | 1071 | 1056 | 66550000 | 0.216312 | 0.003175 | 0 |
| chr16 | 66900001 | 67000000 | 1095 | 1079 | 66950000 | 0.217199 | 0.003069 | 0 |
| chr16 | 67000001 | 67100000 | 970  | 977  | 67050000 | 0.185589 | 0.009572 | 0 |
| chr16 | 67050001 | 67150000 | 932  | 929  | 67100000 | 0.200614 | 0.005674 | 0 |
| chr16 | 67150001 | 67250000 | 1156 | 1138 | 67200000 | 0.218604 | 0.002908 | 0 |
| chr16 | 67200001 | 67300000 | 1189 | 1121 | 67250000 | 0.280925 | 0.000201 | 0 |
| chr16 | 67250001 | 67350000 | 1136 | 1121 | 67300000 | 0.21514  | 0.00332  | 0 |



|       |          |          |      |      |          |          |          |   |
|-------|----------|----------|------|------|----------|----------|----------|---|
| chr16 | 67600001 | 67700000 | 963  | 925  | 67650000 | 0.254045 | 0.000682 | 0 |
| chr16 | 67800001 | 67900000 | 945  | 930  | 67850000 | 0.219047 | 0.002859 | 0 |
| chr16 | 67850001 | 67950000 | 1038 | 994  | 67900000 | 0.258452 | 0.000562 | 0 |
| chr16 | 67900001 | 68000000 | 1186 | 1076 | 67950000 | 0.336389 | 1.18E-05 | 0 |
| chr16 | 67950001 | 68050000 | 1138 | 1069 | 6.80E+07 | 0.286202 | 0.000157 | 0 |
| chr16 | 68000001 | 68100000 | 994  | 967  | 68050000 | 0.235693 | 0.001477 | 0 |
| chr16 | 68050001 | 68150000 | 975  | 947  | 68100000 | 0.238001 | 0.001344 | 0 |
| chr16 | 68200001 | 68300000 | 962  | 966  | 68250000 | 0.189977 | 0.008244 | 0 |
| chr16 | 68300001 | 68400000 | 1125 | 1101 | 68350000 | 0.227074 | 0.00209  | 0 |
| chr16 | 68500001 | 68600000 | 991  | 986  | 68550000 | 0.20326  | 0.005158 | 0 |
| chr16 | 69150001 | 69250000 | 939  | 935  | 69200000 | 0.202122 | 0.005374 | 0 |
| chr16 | 69350001 | 69450000 | 1324 | 1294 | 69400000 | 0.229029 | 0.001934 | 0 |
| chr16 | 69700001 | 69800000 | 901  | 903  | 69750000 | 0.192764 | 0.007486 | 0 |
| chr16 | 69750001 | 69850000 | 874  | 869  | 69800000 | 0.20424  | 0.004977 | 0 |
| chr16 | 70100001 | 70200000 | 241  | 239  | 70150000 | 0.207986 | 0.004339 | 0 |
| chr16 | 70200001 | 70300000 | 213  | 214  | 70250000 | 0.189206 | 0.008465 | 0 |
| chr16 | 70350001 | 70450000 | 895  | 858  | 70400000 | 0.256873 | 0.000602 | 0 |
| chr16 | 70400001 | 70500000 | 987  | 913  | 70450000 | 0.308398 | 5.21E-05 | 0 |
| chr16 | 70450001 | 70550000 | 1016 | 951  | 70500000 | 0.291346 | 0.000122 | 0 |
| chr16 | 70650001 | 70750000 | 1072 | 1040 | 70700000 | 0.239684 | 0.001254 | 0 |
| chr16 | 70700001 | 70800000 | 1280 | 1277 | 70750000 | 0.199348 | 0.005937 | 0 |
| chr16 | 71450001 | 71550000 | 1029 | 1035 | 71500000 | 0.187575 | 0.008949 | 0 |
| chr16 | 71850001 | 71950000 | 944  | 884  | 71900000 | 0.290704 | 0.000126 | 0 |
| chr16 | 71900001 | 72000000 | 884  | 845  | 71950000 | 0.261058 | 0.000501 | 0 |
| chr16 | 73050001 | 73150000 | 1086 | 1055 | 73100000 | 0.237744 | 0.001358 | 0 |
| chr16 | 74400001 | 74500000 | 343  | 339  | 74450000 | 0.212886 | 0.003615 | 0 |
| chr16 | 74700001 | 74800000 | 1036 | 997  | 74750000 | 0.251322 | 0.000767 | 0 |
| chr16 | 75250001 | 75350000 | 1087 | 1041 | 75300000 | 0.258345 | 0.000565 | 0 |
| chr16 | 75500001 | 75600000 | 868  | 861  | 75550000 | 0.207645 | 0.004394 | 0 |
| chr16 | 78300001 | 78400000 | 596  | 790  | 78350000 | -0.21058 | 0.004256 | 0 |
| chr16 | 80100001 | 80200000 | 708  | 926  | 80150000 | -0.1913  | 0.008353 | 0 |
| chr16 | 80900001 | 81000000 | 979  | 985  | 80950000 | 0.187148 | 0.00908  | 0 |
| chr16 | 80950001 | 81050000 | 1016 | 991  | 8.10E+07 | 0.231906 | 0.001723 | 0 |
| chr16 | 81000001 | 81100000 | 982  | 974  | 81050000 | 0.207764 | 0.004374 | 0 |
| chr16 | 81050001 | 81150000 | 966  | 895  | 81100000 | 0.306099 | 5.86E-05 | 0 |
| chr16 | 81100001 | 81200000 | 918  | 900  | 81150000 | 0.224532 | 0.00231  | 0 |
| chr16 | 81950001 | 82050000 | 770  | 1004 | 8.20E+07 | -0.18687 | 0.009687 | 0 |
| chr16 | 83350001 | 83450000 | 720  | 947  | 83400000 | -0.1994  | 0.006329 | 0 |
| chr16 | 83450001 | 83550000 | 761  | 1005 | 83500000 | -0.20526 | 0.00515  | 0 |
| chr16 | 83500001 | 83600000 | 757  | 991  | 83550000 | -0.19263 | 0.007986 | 0 |
| chr16 | 84500001 | 84600000 | 1007 | 1010 | 84550000 | 0.191671 | 0.007776 | 0 |
| chr16 | 84650001 | 84750000 | 1056 | 1042 | 84700000 | 0.215218 | 0.00331  | 0 |
| chr16 | 84700001 | 84800000 | 1015 | 1015 | 84750000 | 0.195963 | 0.006694 | 0 |
| chr16 | 84800001 | 84900000 | 1110 | 1068 | 84850000 | 0.251611 | 0.000757 | 0 |
| chr16 | 84850001 | 84950000 | 1077 | 1050 | 84900000 | 0.232592 | 0.001676 | 0 |
| chr16 | 84900001 | 85000000 | 1065 | 1063 | 84950000 | 0.198675 | 0.006081 | 0 |
| chr16 | 85150001 | 85250000 | 1264 | 1192 | 85200000 | 0.280575 | 0.000205 | 0 |

|       |          |          |      |      |          |          |          |   |
|-------|----------|----------|------|------|----------|----------|----------|---|
| chr16 | 85200001 | 85300000 | 1318 | 1241 | 85250000 | 0.28281  | 0.000184 | 0 |
| chr16 | 85350001 | 85450000 | 1194 | 1159 | 85400000 | 0.238885 | 0.001296 | 0 |
| chr16 | 85400001 | 85500000 | 1217 | 1162 | 85450000 | 0.262682 | 0.000466 | 0 |
| chr16 | 85450001 | 85550000 | 1247 | 1206 | 85500000 | 0.244195 | 0.001039 | 0 |
| chr16 | 85550001 | 85650000 | 1317 | 1251 | 85600000 | 0.270137 | 0.000332 | 0 |
| chr16 | 85600001 | 85700000 | 1332 | 1276 | 85650000 | 0.257929 | 0.000575 | 0 |
| chr16 | 85700001 | 85800000 | 1131 | 1118 | 85750000 | 0.212642 | 0.003648 | 0 |
| chr16 | 86050001 | 86150000 | 1098 | 1097 | 86100000 | 0.197278 | 0.00639  | 0 |
| chr16 | 86100001 | 86200000 | 1063 | 1049 | 86150000 | 0.21509  | 0.003326 | 0 |
| chr16 | 86500001 | 86600000 | 1178 | 1130 | 86550000 | 0.25598  | 0.000626 | 0 |
| chr16 | 86550001 | 86650000 | 1128 | 1117 | 86600000 | 0.210101 | 0.004012 | 0 |
| chr16 | 86950001 | 87050000 | 1174 | 1171 | 8.70E+07 | 0.199654 | 0.005872 | 0 |
| chr16 | 87400001 | 87500000 | 1019 | 1022 | 87450000 | 0.191722 | 0.007762 | 0 |
| chr16 | 88300001 | 88400000 | 975  | 941  | 88350000 | 0.247171 | 0.000916 | 0 |
| chr16 | 88350001 | 88450000 | 680  | 651  | 88400000 | 0.25884  | 0.000552 | 0 |
| chr16 | 88450001 | 88550000 | 1334 | 1290 | 88500000 | 0.244351 | 0.001032 | 0 |
| chr16 | 88500001 | 88600000 | 1360 | 1315 | 88550000 | 0.244507 | 0.001025 | 0 |
| chr16 | 88550001 | 88650000 | 1262 | 1252 | 88600000 | 0.20744  | 0.004427 | 0 |
| chr16 | 88600001 | 88700000 | 1123 | 1131 | 88650000 | 0.185722 | 0.009529 | 0 |
| chr16 | 88650001 | 88750000 | 1150 | 1154 | 88700000 | 0.190954 | 0.007971 | 0 |
| chr16 | 88700001 | 88800000 | 1311 | 1241 | 88750000 | 0.275128 | 0.000264 | 0 |
| chr16 | 88750001 | 88850000 | 1334 | 1300 | 88800000 | 0.23321  | 0.001634 | 0 |
| chr16 | 88800001 | 88900000 | 1226 | 1204 | 88850000 | 0.222087 | 0.002542 | 0 |
| chr16 | 88950001 | 89050000 | 1330 | 1319 | 8.90E+07 | 0.207945 | 0.004345 | 0 |
| chr16 | 89050001 | 89150000 | 1206 | 1209 | 89100000 | 0.192379 | 0.007587 | 0 |
| chr16 | 89100001 | 89200000 | 1217 | 1188 | 89150000 | 0.230757 | 0.001804 | 0 |
| chr16 | 89300001 | 89400000 | 1085 | 1093 | 89350000 | 0.185365 | 0.009645 | 0 |
| chr16 | 89350001 | 89450000 | 1207 | 1137 | 89400000 | 0.282156 | 0.00019  | 0 |
| chr16 | 89550001 | 89650000 | 1127 | 1019 | 89600000 | 0.341296 | 8.98E-06 | 0 |
| chr16 | 89600001 | 89700000 | 1155 | 1067 | 89650000 | 0.310296 | 4.73E-05 | 0 |
| chr16 | 89650001 | 89750000 | 1027 | 1015 | 89700000 | 0.212919 | 0.00361  | 0 |
| chr16 | 89700001 | 89800000 | 1076 | 1053 | 89750000 | 0.227136 | 0.002085 | 0 |
| chr16 | 89750001 | 89850000 | 1049 | 1047 | 89800000 | 0.198716 | 0.006072 | 0 |
| chr16 | 89800001 | 89900000 | 927  | 901  | 89850000 | 0.237005 | 0.0014   | 0 |
| chr16 | 89850001 | 89950000 | 950  | 864  | 89900000 | 0.332859 | 1.43E-05 | 0 |
| chr16 | 89900001 | 90000000 | 1032 | 955  | 89950000 | 0.307833 | 5.36E-05 | 0 |
| chr16 | 89950001 | 90050000 | 1068 | 1048 | 9.00E+07 | 0.223236 | 0.002431 | 0 |
| chr16 | 90100001 | 90200000 | 476  | 469  | 90150000 | 0.217337 | 0.003053 | 0 |
| chr16 | 90200001 | 90300000 | 5    | 9    | 90250000 | -0.65203 | 3.56E-15 | 0 |
| chr16 | 90250001 | 90350000 | 1    | 4    | 90300000 | -1.80404 | 2.39E-66 | 0 |
| chr16 | 150001   | 250000   | 865  | 898  | 2.00E+05 | 0.141948 | 0.036523 | 0 |
| chr16 | 300001   | 400000   | 1065 | 1096 | 350000   | 0.154569 | 0.025483 | 0 |
| chr16 | 1000001  | 1100000  | 1239 | 1284 | 1050000  | 0.144494 | 0.034025 | 0 |
| chr16 | 1050001  | 1150000  | 1296 | 1323 | 1100000  | 0.166216 | 0.017925 | 0 |
| chr16 | 2750001  | 2850000  | 1273 | 1310 | 2800000  | 0.154629 | 0.025438 | 0 |
| chr16 | 3200001  | 3300000  | 977  | 1008 | 3250000  | 0.150898 | 0.028359 | 0 |
| chr16 | 3300001  | 3400000  | 904  | 942  | 3350000  | 0.136559 | 0.042306 | 0 |

|       |          |          |      |      |          |          |          |   |
|-------|----------|----------|------|------|----------|----------|----------|---|
| chr16 | 3500001  | 3600000  | 1016 | 1037 | 3550000  | 0.166448 | 0.017796 | 0 |
| chr16 | 3600001  | 3700000  | 1008 | 1036 | 3650000  | 0.156435 | 0.024117 | 0 |
| chr16 | 3950001  | 4050000  | 901  | 931  | 4.00E+06 | 0.148709 | 0.0302   | 0 |
| chr16 | 4100001  | 4200000  | 960  | 983  | 4150000  | 0.161806 | 0.020524 | 0 |
| chr16 | 4200001  | 4300000  | 1021 | 1062 | 4250000  | 0.139162 | 0.039426 | 0 |
| chr16 | 4750001  | 4850000  | 959  | 994  | 4800000  | 0.144248 | 0.03426  | 0 |
| chr16 | 4900001  | 5000000  | 1110 | 1144 | 4950000  | 0.152436 | 0.027123 | 0 |
| chr16 | 5000001  | 5100000  | 1014 | 1045 | 5050000  | 0.152518 | 0.027058 | 0 |
| chr16 | 5050001  | 5150000  | 867  | 906  | 5100000  | 0.132484 | 0.047154 | 0 |
| chr16 | 5100001  | 5200000  | 478  | 490  | 5150000  | 0.160192 | 0.021553 | 0 |
| chr16 | 6000001  | 6100000  | 704  | 915  | 6050000  | -0.18223 | 0.011276 | 0 |
| chr16 | 6200001  | 6300000  | 653  | 842  | 6250000  | -0.17077 | 0.016221 | 0 |
| chr16 | 6300001  | 6400000  | 687  | 875  | 6350000  | -0.15301 | 0.027535 | 0 |
| chr16 | 7050001  | 7150000  | 651  | 832  | 7100000  | -0.15796 | 0.023858 | 0 |
| chr16 | 8000001  | 8100000  | 661  | 836  | 8050000  | -0.14289 | 0.036535 | 0 |
| chr16 | 8950001  | 9050000  | 1014 | 1043 | 9.00E+06 | 0.155282 | 0.024953 | 0 |
| chr16 | 9100001  | 9200000  | 865  | 905  | 9150000  | 0.130745 | 0.049354 | 0 |
| chr16 | 9900001  | 10000000 | 770  | 982  | 9950000  | -0.1549  | 0.026078 | 0 |
| chr16 | 10350001 | 10450000 | 618  | 639  | 10400000 | 0.147754 | 0.031034 | 0 |
| chr16 | 10650001 | 10750000 | 1013 | 1042 | 10700000 | 0.155242 | 0.024982 | 0 |
| chr16 | 11750001 | 11850000 | 1062 | 1085 | 11800000 | 0.165052 | 0.018582 | 0 |
| chr16 | 12350001 | 12450000 | 908  | 1150 | 12400000 | -0.14491 | 0.03457  | 0 |
| chr16 | 12500001 | 12600000 | 896  | 932  | 12550000 | 0.139132 | 0.039458 | 0 |
| chr16 | 12600001 | 12700000 | 766  | 967  | 12650000 | -0.14021 | 0.039289 | 0 |
| chr16 | 14300001 | 14400000 | 983  | 1005 | 14350000 | 0.164031 | 0.019175 | 0 |
| chr16 | 15100001 | 15200000 | 493  | 512  | 15150000 | 0.141407 | 0.037072 | 0 |
| chr16 | 15200001 | 15300000 | 62   | 63   | 15250000 | 0.172879 | 0.014532 | 0 |
| chr16 | 15450001 | 15550000 | 451  | 468  | 15500000 | 0.142582 | 0.035887 | 0 |
| chr16 | 15500001 | 15600000 | 815  | 836  | 15550000 | 0.15926  | 0.022166 | 0 |
| chr16 | 15750001 | 15850000 | 930  | 968  | 15800000 | 0.138187 | 0.040486 | 0 |
| chr16 | 16000001 | 16100000 | 860  | 885  | 16050000 | 0.154622 | 0.025442 | 0 |
| chr16 | 16050001 | 16150000 | 931  | 943  | 16100000 | 0.177486 | 0.012524 | 0 |
| chr16 | 17050001 | 17150000 | 675  | 858  | 17100000 | -0.15013 | 0.029887 | 0 |
| chr16 | 17200001 | 17300000 | 874  | 914  | 17250000 | 0.131402 | 0.048514 | 0 |
| chr16 | 17850001 | 17950000 | 704  | 907  | 17900000 | -0.16956 | 0.016838 | 0 |
| chr16 | 18150001 | 18250000 | 185  | 191  | 18200000 | 0.149916 | 0.029174 | 0 |
| chr16 | 18950001 | 19050000 | 735  | 755  | 1.90E+07 | 0.157231 | 0.023553 | 0 |
| chr16 | 19000001 | 19100000 | 831  | 861  | 19050000 | 0.144798 | 0.033736 | 0 |
| chr16 | 19150001 | 19250000 | 1025 | 1066 | 19200000 | 0.13938  | 0.039193 | 0 |
| chr16 | 19300001 | 19400000 | 944  | 972  | 19350000 | 0.153794 | 0.026069 | 0 |
| chr16 | 19350001 | 19450000 | 870  | 882  | 19400000 | 0.1762   | 0.013059 | 0 |
| chr16 | 19500001 | 19600000 | 873  | 899  | 19550000 | 0.153624 | 0.026199 | 0 |
| chr16 | 20000001 | 20100000 | 808  | 1018 | 20050000 | -0.13735 | 0.042412 | 0 |
| chr16 | 20050001 | 20150000 | 795  | 1012 | 20100000 | -0.15222 | 0.028164 | 0 |
| chr16 | 20100001 | 20200000 | 774  | 974  | 20150000 | -0.13563 | 0.044387 | 0 |
| chr16 | 20150001 | 20250000 | 775  | 976  | 20200000 | -0.13672 | 0.043121 | 0 |
| chr16 | 21350001 | 21450000 | 56   | 58   | 21400000 | 0.145337 | 0.03323  | 0 |

|       |          |          |      |      |          |          |          |   |
|-------|----------|----------|------|------|----------|----------|----------|---|
| chr16 | 21500001 | 21600000 | 584  | 594  | 21550000 | 0.171468 | 0.0152   | 0 |
| chr16 | 21650001 | 21750000 | 714  | 908  | 21700000 | -0.15081 | 0.029319 | 0 |
| chr16 | 21850001 | 21950000 | 33   | 34   | 21900000 | 0.152894 | 0.026763 | 0 |
| chr16 | 23250001 | 23350000 | 774  | 976  | 23300000 | -0.13858 | 0.041037 | 0 |
| chr16 | 23550001 | 23650000 | 873  | 902  | 23600000 | 0.148817 | 0.030107 | 0 |
| chr16 | 24500001 | 24600000 | 878  | 910  | 24550000 | 0.144317 | 0.034194 | 0 |
| chr16 | 25100001 | 25200000 | 871  | 887  | 25150000 | 0.169702 | 0.016074 | 0 |
| chr16 | 25300001 | 25400000 | 699  | 888  | 25350000 | -0.1493  | 0.030588 | 0 |
| chr16 | 25350001 | 25450000 | 692  | 885  | 25400000 | -0.15894 | 0.023183 | 0 |
| chr16 | 25700001 | 25800000 | 756  | 949  | 25750000 | -0.13206 | 0.048715 | 0 |
| chr16 | 25800001 | 25900000 | 681  | 866  | 25850000 | -0.15075 | 0.029365 | 0 |
| chr16 | 26000001 | 26100000 | 685  | 879  | 26050000 | -0.1638  | 0.020068 | 0 |
| chr16 | 26100001 | 26200000 | 642  | 818  | 26150000 | -0.15356 | 0.027101 | 0 |
| chr16 | 26250001 | 26350000 | 670  | 859  | 26300000 | -0.16253 | 0.020842 | 0 |
| chr16 | 26950001 | 27050000 | 748  | 956  | 2.70E+07 | -0.15801 | 0.023826 | 0 |
| chr16 | 27150001 | 27250000 | 1041 | 1057 | 27200000 | 0.173958 | 0.014039 | 0 |
| chr16 | 27250001 | 27350000 | 901  | 937  | 27300000 | 0.139441 | 0.039127 | 0 |
| chr16 | 27800001 | 27900000 | 1017 | 1027 | 27850000 | 0.181847 | 0.01085  | 0 |
| chr16 | 27850001 | 27950000 | 955  | 998  | 27900000 | 0.132424 | 0.047229 | 0 |
| chr16 | 28100001 | 28200000 | 1059 | 1106 | 28150000 | 0.133314 | 0.046132 | 0 |
| chr16 | 28200001 | 28300000 | 877  | 913  | 28250000 | 0.137925 | 0.040774 | 0 |
| chr16 | 28250001 | 28350000 | 904  | 934  | 28300000 | 0.148863 | 0.030067 | 0 |
| chr16 | 28500001 | 28600000 | 923  | 950  | 28550000 | 0.154366 | 0.025635 | 0 |
| chr16 | 28750001 | 28850000 | 253  | 256  | 28800000 | 0.178957 | 0.011936 | 0 |
| chr16 | 28900001 | 29000000 | 930  | 968  | 28950000 | 0.138187 | 0.040486 | 0 |
| chr16 | 29000001 | 29100000 | 367  | 383  | 29050000 | 0.134399 | 0.044823 | 0 |
| chr16 | 29250001 | 29350000 | 226  | 230  | 29300000 | 0.170652 | 0.015599 | 0 |
| chr16 | 29300001 | 29400000 | 165  | 167  | 29350000 | 0.178581 | 0.012084 | 0 |
| chr16 | 29600001 | 29700000 | 438  | 449  | 29650000 | 0.160178 | 0.021561 | 0 |
| chr16 | 29750001 | 29850000 | 966  | 981  | 29800000 | 0.173733 | 0.01414  | 0 |
| chr16 | 30250001 | 30350000 | 38   | 49   | 30300000 | -0.17082 | 0.016198 | 0 |
| chr16 | 30350001 | 30450000 | 979  | 992  | 30400000 | 0.176932 | 0.012752 | 0 |
| chr16 | 30450001 | 30550000 | 896  | 906  | 30500000 | 0.179951 | 0.011552 | 0 |
| chr16 | 30650001 | 30750000 | 1007 | 1026 | 30700000 | 0.168996 | 0.016435 | 0 |
| chr16 | 31300001 | 31400000 | 818  | 833  | 31350000 | 0.169747 | 0.016051 | 0 |
| chr16 | 31400001 | 31500000 | 990  | 1036 | 31450000 | 0.130439 | 0.04975  | 0 |
| chr16 | 32500001 | 32600000 | 681  | 855  | 32550000 | -0.13231 | 0.048404 | 0 |
| chr16 | 32800001 | 32900000 | 73   | 75   | 32850000 | 0.156969 | 0.023737 | 0 |
| chr16 | 33150001 | 33250000 | 50   | 65   | 33200000 | -0.18255 | 0.011161 | 0 |
| chr16 | 33200001 | 33300000 | 121  | 156  | 33250000 | -0.17058 | 0.01632  | 0 |
| chr16 | 33300001 | 33400000 | 62   | 63   | 33350000 | 0.172879 | 0.014532 | 0 |
| chr16 | 33550001 | 33650000 | 273  | 347  | 33600000 | -0.15007 | 0.029933 | 0 |
| chr16 | 33850001 | 33950000 | 922  | 1189 | 33900000 | -0.17095 | 0.016134 | 0 |
| chr16 | 34100001 | 34200000 | 213  | 272  | 34150000 | -0.15679 | 0.024689 | 0 |
| chr16 | 34150001 | 34250000 | 454  | 574  | 34200000 | -0.1424  | 0.03703  | 0 |
| chr16 | 34450001 | 34550000 | 471  | 594  | 34500000 | -0.13877 | 0.040831 | 0 |
| chr16 | 34600001 | 34700000 | 572  | 732  | 34650000 | -0.15987 | 0.022561 | 0 |

|       |          |          |      |      |          |          |          |   |
|-------|----------|----------|------|------|----------|----------|----------|---|
| chr16 | 34650001 | 34750000 | 565  | 710  | 34700000 | -0.13361 | 0.046799 | 0 |
| chr16 | 34750001 | 34850000 | 520  | 655  | 34800000 | -0.13702 | 0.042782 | 0 |
| chr16 | 34850001 | 34950000 | 518  | 657  | 34900000 | -0.14698 | 0.032644 | 0 |
| chr16 | 47700001 | 47800000 | 709  | 893  | 47750000 | -0.13691 | 0.042905 | 0 |
| chr16 | 48350001 | 48450000 | 836  | 864  | 48400000 | 0.148435 | 0.030438 | 0 |
| chr16 | 48400001 | 48500000 | 829  | 852  | 48450000 | 0.156482 | 0.024083 | 0 |
| chr16 | 48700001 | 48800000 | 683  | 882  | 48750000 | -0.17293 | 0.015168 | 0 |
| chr16 | 48750001 | 48850000 | 636  | 819  | 48800000 | -0.16887 | 0.0172   | 0 |
| chr16 | 48800001 | 48900000 | 715  | 906  | 48850000 | -0.1456  | 0.033911 | 0 |
| chr16 | 48950001 | 49050000 | 742  | 965  | 4.90E+07 | -0.18315 | 0.010946 | 0 |
| chr16 | 49500001 | 49600000 | 997  | 1033 | 49550000 | 0.144788 | 0.033746 | 0 |
| chr16 | 49550001 | 49650000 | 993  | 1032 | 49600000 | 0.140386 | 0.038128 | 0 |
| chr16 | 51150001 | 51250000 | 706  | 895  | 51200000 | -0.14626 | 0.033304 | 0 |
| chr16 | 51350001 | 51450000 | 618  | 784  | 51400000 | -0.14728 | 0.032367 | 0 |
| chr16 | 51550001 | 51650000 | 628  | 807  | 51600000 | -0.16584 | 0.018867 | 0 |
| chr16 | 51600001 | 51700000 | 625  | 811  | 51650000 | -0.17988 | 0.012167 | 0 |
| chr16 | 51950001 | 52050000 | 625  | 788  | 5.20E+07 | -0.13838 | 0.041266 | 0 |
| chr16 | 52150001 | 52250000 | 638  | 828  | 52200000 | -0.18011 | 0.012077 | 0 |
| chr16 | 52800001 | 52900000 | 695  | 879  | 52850000 | -0.14289 | 0.036538 | 0 |
| chr16 | 52900001 | 53000000 | 687  | 882  | 52950000 | -0.16451 | 0.019645 | 0 |
| chr16 | 53400001 | 53500000 | 686  | 710  | 53450000 | 0.146353 | 0.032292 | 0 |
| chr16 | 54300001 | 54400000 | 964  | 984  | 54350000 | 0.166338 | 0.017857 | 0 |
| chr16 | 55150001 | 55250000 | 814  | 1025 | 55200000 | -0.13656 | 0.043306 | 0 |
| chr16 | 55600001 | 55700000 | 674  | 858  | 55650000 | -0.15227 | 0.028127 | 0 |
| chr16 | 56700001 | 56800000 | 977  | 1013 | 56750000 | 0.143759 | 0.034731 | 0 |
| chr16 | 57400001 | 57500000 | 1010 | 1054 | 57450000 | 0.134443 | 0.04477  | 0 |
| chr16 | 57650001 | 57750000 | 1226 | 1263 | 57700000 | 0.153067 | 0.026628 | 0 |
| chr16 | 58150001 | 58250000 | 1010 | 1037 | 58200000 | 0.157902 | 0.023086 | 0 |
| chr16 | 58500001 | 58600000 | 1022 | 1053 | 58550000 | 0.152853 | 0.026795 | 0 |
| chr16 | 58550001 | 58650000 | 883  | 892  | 58600000 | 0.181333 | 0.011036 | 0 |
| chr16 | 58950001 | 59050000 | 585  | 748  | 5.90E+07 | -0.15864 | 0.02339  | 0 |
| chr16 | 59000001 | 59100000 | 607  | 779  | 59050000 | -0.16396 | 0.019968 | 0 |
| chr16 | 59100001 | 59200000 | 595  | 762  | 59150000 | -0.16094 | 0.021856 | 0 |
| chr16 | 59150001 | 59250000 | 669  | 869  | 59200000 | -0.18139 | 0.01159  | 0 |
| chr16 | 59200001 | 59300000 | 649  | 826  | 59250000 | -0.15196 | 0.028373 | 0 |
| chr16 | 59550001 | 59650000 | 538  | 691  | 59600000 | -0.16512 | 0.019286 | 0 |
| chr16 | 59600001 | 59700000 | 580  | 741  | 59650000 | -0.15746 | 0.024213 | 0 |
| chr16 | 59650001 | 59750000 | 591  | 753  | 59700000 | -0.15353 | 0.027129 | 0 |
| chr16 | 59850001 | 59950000 | 587  | 759  | 59900000 | -0.17478 | 0.014315 | 0 |
| chr16 | 59900001 | 60000000 | 621  | 781  | 59950000 | -0.13477 | 0.0454   | 0 |
| chr16 | 60000001 | 60100000 | 582  | 754  | 60050000 | -0.17758 | 0.013097 | 0 |
| chr16 | 60550001 | 60650000 | 553  | 699  | 60600000 | -0.14205 | 0.03738  | 0 |
| chr16 | 60900001 | 61000000 | 556  | 715  | 60950000 | -0.1669  | 0.018273 | 0 |
| chr16 | 61250001 | 61350000 | 619  | 784  | 61300000 | -0.14495 | 0.034528 | 0 |
| chr16 | 61300001 | 61400000 | 632  | 818  | 61350000 | -0.17621 | 0.013679 | 0 |
| chr16 | 61350001 | 61450000 | 650  | 824  | 61400000 | -0.14624 | 0.033318 | 0 |
| chr16 | 61450001 | 61550000 | 608  | 780  | 61500000 | -0.16344 | 0.020284 | 0 |

|       |          |          |      |      |          |          |          |   |
|-------|----------|----------|------|------|----------|----------|----------|---|
| chr16 | 61500001 | 61600000 | 659  | 827  | 61550000 | -0.13165 | 0.049238 | 0 |
| chr16 | 61650001 | 61750000 | 595  | 749  | 61700000 | -0.13611 | 0.04382  | 0 |
| chr16 | 61700001 | 61800000 | 621  | 809  | 61750000 | -0.18558 | 0.010106 | 0 |
| chr16 | 61750001 | 61850000 | 578  | 750  | 61800000 | -0.17986 | 0.012176 | 0 |
| chr16 | 61800001 | 61900000 | 573  | 720  | 61850000 | -0.1335  | 0.046929 | 0 |
| chr16 | 61850001 | 61950000 | 589  | 752  | 61900000 | -0.1565  | 0.024897 | 0 |
| chr16 | 62050001 | 62150000 | 644  | 817  | 62100000 | -0.14731 | 0.032341 | 0 |
| chr16 | 62200001 | 62300000 | 636  | 825  | 62250000 | -0.1794  | 0.012355 | 0 |
| chr16 | 62250001 | 62350000 | 644  | 811  | 62300000 | -0.13668 | 0.043171 | 0 |
| chr16 | 62300001 | 62400000 | 621  | 802  | 62350000 | -0.17305 | 0.015114 | 0 |
| chr16 | 62400001 | 62500000 | 579  | 732  | 62450000 | -0.14232 | 0.037109 | 0 |
| chr16 | 62650001 | 62750000 | 601  | 756  | 62700000 | -0.13506 | 0.045054 | 0 |
| chr16 | 62900001 | 63000000 | 641  | 813  | 62950000 | -0.14697 | 0.032653 | 0 |
| chr16 | 62950001 | 63050000 | 549  | 701  | 6.30E+07 | -0.15665 | 0.024793 | 0 |
| chr16 | 63050001 | 63150000 | 599  | 752  | 63100000 | -0.13221 | 0.048521 | 0 |
| chr16 | 63250001 | 63350000 | 619  | 781  | 63300000 | -0.13942 | 0.04013  | 0 |
| chr16 | 63350001 | 63450000 | 568  | 731  | 63400000 | -0.16802 | 0.017657 | 0 |
| chr16 | 64150001 | 64250000 | 577  | 735  | 64200000 | -0.15321 | 0.027378 | 0 |
| chr16 | 64350001 | 64450000 | 627  | 802  | 64400000 | -0.15917 | 0.023025 | 0 |
| chr16 | 64750001 | 64850000 | 654  | 840  | 64800000 | -0.16514 | 0.019275 | 0 |
| chr16 | 64800001 | 64900000 | 665  | 853  | 64850000 | -0.16323 | 0.020413 | 0 |
| chr16 | 65150001 | 65250000 | 655  | 853  | 65200000 | -0.18509 | 0.010272 | 0 |
| chr16 | 65200001 | 65300000 | 618  | 786  | 65250000 | -0.15096 | 0.029191 | 0 |
| chr16 | 65250001 | 65350000 | 623  | 787  | 65300000 | -0.14117 | 0.038284 | 0 |
| chr16 | 65450001 | 65550000 | 696  | 874  | 65500000 | -0.13258 | 0.048059 | 0 |
| chr16 | 65550001 | 65650000 | 679  | 872  | 65600000 | -0.16495 | 0.019381 | 0 |
| chr16 | 65600001 | 65700000 | 719  | 921  | 65650000 | -0.16125 | 0.021657 | 0 |
| chr16 | 65650001 | 65750000 | 672  | 867  | 65700000 | -0.17161 | 0.015807 | 0 |
| chr16 | 65750001 | 65850000 | 712  | 909  | 65800000 | -0.15644 | 0.024942 | 0 |
| chr16 | 66450001 | 66550000 | 1055 | 1064 | 66500000 | 0.183708 | 0.010197 | 0 |
| chr16 | 66550001 | 66650000 | 1100 | 1109 | 66600000 | 0.184207 | 0.010028 | 0 |
| chr16 | 66750001 | 66850000 | 917  | 952  | 66800000 | 0.141923 | 0.036548 | 0 |
| chr16 | 66850001 | 66950000 | 1027 | 1071 | 66900000 | 0.135441 | 0.043594 | 0 |
| chr16 | 66950001 | 67050000 | 1060 | 1091 | 6.70E+07 | 0.154376 | 0.025627 | 0 |
| chr16 | 67100001 | 67200000 | 1018 | 1028 | 67150000 | 0.18186  | 0.010845 | 0 |
| chr16 | 67400001 | 67500000 | 1176 | 1221 | 67450000 | 0.141788 | 0.036685 | 0 |
| chr16 | 67450001 | 67550000 | 1112 | 1159 | 67500000 | 0.136239 | 0.042671 | 0 |
| chr16 | 67650001 | 67750000 | 1050 | 1061 | 67700000 | 0.180928 | 0.011185 | 0 |
| chr16 | 67750001 | 67850000 | 962  | 981  | 67800000 | 0.167747 | 0.01709  | 0 |
| chr16 | 68150001 | 68250000 | 863  | 902  | 68200000 | 0.132196 | 0.047513 | 0 |
| chr16 | 68250001 | 68350000 | 1062 | 1105 | 68300000 | 0.1387   | 0.039925 | 0 |
| chr16 | 68350001 | 68450000 | 1124 | 1157 | 68400000 | 0.154216 | 0.025748 | 0 |
| chr16 | 69200001 | 69300000 | 908  | 936  | 69250000 | 0.152147 | 0.027352 | 0 |
| chr16 | 69600001 | 69700000 | 859  | 876  | 69650000 | 0.16769  | 0.017121 | 0 |
| chr16 | 69650001 | 69750000 | 854  | 874  | 69700000 | 0.162566 | 0.020055 | 0 |
| chr16 | 69800001 | 69900000 | 893  | 927  | 69850000 | 0.142054 | 0.036416 | 0 |
| chr16 | 69950001 | 70050000 | 360  | 375  | 7.00E+07 | 0.137069 | 0.041728 | 0 |

|       |          |          |      |      |          |          |          |   |
|-------|----------|----------|------|------|----------|----------|----------|---|
| chr16 | 70150001 | 70250000 | 204  | 209  | 70200000 | 0.161029 | 0.021014 | 0 |
| chr16 | 70300001 | 70400000 | 860  | 874  | 70350000 | 0.172666 | 0.014631 | 0 |
| chr16 | 70500001 | 70600000 | 969  | 990  | 70550000 | 0.165031 | 0.018594 | 0 |
| chr16 | 70750001 | 70850000 | 1154 | 1193 | 70800000 | 0.148012 | 0.030807 | 0 |
| chr16 | 71300001 | 71400000 | 926  | 969  | 71350000 | 0.130479 | 0.049699 | 0 |
| chr16 | 71350001 | 71450000 | 1034 | 1063 | 71400000 | 0.156058 | 0.024388 | 0 |
| chr16 | 71400001 | 71500000 | 1068 | 1083 | 71450000 | 0.175841 | 0.013211 | 0 |
| chr16 | 71950001 | 72050000 | 864  | 877  | 7.20E+07 | 0.174418 | 0.013833 | 0 |
| chr16 | 72450001 | 72550000 | 776  | 1010 | 72500000 | -0.18426 | 0.010553 | 0 |
| chr16 | 73000001 | 73100000 | 1103 | 1115 | 73050000 | 0.180352 | 0.0114   | 0 |
| chr16 | 73100001 | 73200000 | 985  | 1016 | 73150000 | 0.151258 | 0.028066 | 0 |
| chr16 | 73850001 | 73950000 | 814  | 842  | 73900000 | 0.147172 | 0.031552 | 0 |
| chr16 | 74050001 | 74150000 | 879  | 903  | 74100000 | 0.1571   | 0.023645 | 0 |
| chr16 | 74150001 | 74250000 | 808  | 1014 | 74200000 | -0.13167 | 0.04921  | 0 |
| chr16 | 74250001 | 74350000 | 916  | 949  | 74300000 | 0.144903 | 0.033638 | 0 |
| chr16 | 74650001 | 74750000 | 910  | 933  | 74700000 | 0.159952 | 0.021709 | 0 |
| chr16 | 75000001 | 75100000 | 861  | 893  | 75050000 | 0.143316 | 0.035162 | 0 |
| chr16 | 75450001 | 75550000 | 860  | 880  | 75500000 | 0.162796 | 0.019914 | 0 |
| chr16 | 77100001 | 77200000 | 635  | 812  | 77150000 | -0.15876 | 0.023307 | 0 |
| chr16 | 78250001 | 78350000 | 663  | 844  | 78300000 | -0.15227 | 0.028123 | 0 |
| chr16 | 78350001 | 78450000 | 611  | 769  | 78400000 | -0.13585 | 0.044128 | 0 |
| chr16 | 78900001 | 79000000 | 522  | 656  | 78950000 | -0.13368 | 0.046704 | 0 |
| chr16 | 79350001 | 79450000 | 743  | 952  | 79400000 | -0.16164 | 0.021407 | 0 |
| chr16 | 79400001 | 79500000 | 693  | 896  | 79450000 | -0.17468 | 0.014358 | 0 |
| chr16 | 79950001 | 80050000 | 750  | 963  | 8.00E+07 | -0.16468 | 0.01954  | 0 |
| chr16 | 80150001 | 80250000 | 741  | 937  | 80200000 | -0.14261 | 0.036812 | 0 |
| chr16 | 80300001 | 80400000 | 764  | 961  | 80350000 | -0.135   | 0.045122 | 0 |
| chr16 | 80500001 | 80600000 | 907  | 1150 | 80550000 | -0.1465  | 0.033084 | 0 |
| chr16 | 81400001 | 81500000 | 1028 | 1069 | 81450000 | 0.139541 | 0.03902  | 0 |
| chr16 | 82100001 | 82200000 | 775  | 979  | 82150000 | -0.14115 | 0.038303 | 0 |
| chr16 | 82900001 | 83000000 | 741  | 937  | 82950000 | -0.14261 | 0.036812 | 0 |
| chr16 | 82950001 | 83050000 | 673  | 863  | 8.30E+07 | -0.16279 | 0.020682 | 0 |
| chr16 | 83300001 | 83400000 | 718  | 921  | 83350000 | -0.16325 | 0.020397 | 0 |
| chr16 | 83400001 | 83500000 | 768  | 978  | 83450000 | -0.15277 | 0.027729 | 0 |
| chr16 | 83550001 | 83650000 | 763  | 990  | 83600000 | -0.17978 | 0.012206 | 0 |
| chr16 | 83600001 | 83700000 | 718  | 924  | 83650000 | -0.16795 | 0.017696 | 0 |
| chr16 | 83900001 | 84000000 | 1093 | 1124 | 83950000 | 0.155614 | 0.024709 | 0 |
| chr16 | 84150001 | 84250000 | 1019 | 1054 | 84200000 | 0.147242 | 0.031489 | 0 |
| chr16 | 84200001 | 84300000 | 1043 | 1072 | 84250000 | 0.156397 | 0.024143 | 0 |
| chr16 | 84250001 | 84350000 | 1103 | 1148 | 84300000 | 0.138273 | 0.040391 | 0 |
| chr16 | 84300001 | 84400000 | 1113 | 1139 | 84350000 | 0.162649 | 0.020004 | 0 |
| chr16 | 84450001 | 84550000 | 947  | 984  | 84500000 | 0.140669 | 0.037833 | 0 |
| chr16 | 84550001 | 84650000 | 1070 | 1107 | 84600000 | 0.146919 | 0.031779 | 0 |
| chr16 | 84750001 | 84850000 | 1033 | 1046 | 84800000 | 0.17792  | 0.012348 | 0 |
| chr16 | 85050001 | 85150000 | 1039 | 1071 | 85100000 | 0.1522   | 0.027309 | 0 |
| chr16 | 85100001 | 85200000 | 1149 | 1178 | 85150000 | 0.160002 | 0.021676 | 0 |
| chr16 | 85250001 | 85350000 | 1247 | 1296 | 85300000 | 0.140359 | 0.038156 | 0 |

|       |          |          |      |      |          |          |          |   |
|-------|----------|----------|------|------|----------|----------|----------|---|
| chr16 | 85300001 | 85400000 | 1244 | 1266 | 85350000 | 0.170672 | 0.015589 | 0 |
| chr16 | 85500001 | 85600000 | 1224 | 1265 | 85550000 | 0.148429 | 0.030443 | 0 |
| chr16 | 85750001 | 85850000 | 1146 | 1183 | 85800000 | 0.15012  | 0.029003 | 0 |
| chr16 | 86300001 | 86400000 | 1072 | 1100 | 86350000 | 0.158764 | 0.022498 | 0 |
| chr16 | 86450001 | 86550000 | 1187 | 1201 | 86500000 | 0.179047 | 0.011901 | 0 |
| chr16 | 86700001 | 86800000 | 998  | 1041 | 86750000 | 0.135105 | 0.043987 | 0 |
| chr16 | 86900001 | 87000000 | 1146 | 1188 | 86950000 | 0.144035 | 0.034464 | 0 |
| chr16 | 87000001 | 87100000 | 1073 | 1113 | 87050000 | 0.14316  | 0.035316 | 0 |
| chr16 | 87350001 | 87450000 | 1073 | 1112 | 87400000 | 0.144456 | 0.034061 | 0 |
| chr16 | 87800001 | 87900000 | 1034 | 1043 | 87850000 | 0.18346  | 0.010282 | 0 |
| chr16 | 87850001 | 87950000 | 777  | 802  | 87900000 | 0.150275 | 0.028873 | 0 |
| chr16 | 87900001 | 88000000 | 646  | 671  | 87950000 | 0.141184 | 0.0373   | 0 |
| chr16 | 87950001 | 88050000 | 765  | 788  | 8.80E+07 | 0.153227 | 0.026504 | 0 |
| chr16 | 88000001 | 88100000 | 652  | 668  | 88050000 | 0.160987 | 0.021041 | 0 |
| chr16 | 88050001 | 88150000 | 641  | 656  | 88100000 | 0.162592 | 0.020039 | 0 |
| chr16 | 88100001 | 88200000 | 475  | 497  | 88150000 | 0.130645 | 0.049484 | 0 |
| chr16 | 88250001 | 88350000 | 526  | 534  | 88300000 | 0.174186 | 0.013936 | 0 |
| chr16 | 88400001 | 88500000 | 798  | 808  | 88450000 | 0.177996 | 0.012317 | 0 |
| chr16 | 88850001 | 88950000 | 1216 | 1255 | 88900000 | 0.150419 | 0.028754 | 0 |
| chr16 | 88900001 | 89000000 | 1313 | 1347 | 88950000 | 0.15908  | 0.022286 | 0 |
| chr16 | 89200001 | 89300000 | 1153 | 1170 | 89250000 | 0.174847 | 0.013643 | 0 |
| chr16 | 89250001 | 89350000 | 1046 | 1068 | 89300000 | 0.165934 | 0.018082 | 0 |
| chr16 | 89400001 | 89500000 | 1091 | 1126 | 89450000 | 0.150407 | 0.028764 | 0 |
| chr16 | 89500001 | 89600000 | 980  | 989  | 89550000 | 0.182774 | 0.01052  | 0 |
| chr16 | 90050001 | 90150000 | 981  | 1011 | 90100000 | 0.152505 | 0.027068 | 0 |
| chr17 | 550001   | 650000   | 943  | 926  | 6.00E+05 | 0.222209 | 0.00253  | 0 |
| chr17 | 600001   | 700000   | 1001 | 968  | 650000   | 0.244326 | 0.001033 | 0 |
| chr17 | 950001   | 1050000  | 945  | 943  | 1.00E+06 | 0.19902  | 0.006007 | 0 |
| chr17 | 1000001  | 1100000  | 1002 | 972  | 1050000  | 0.239817 | 0.001247 | 0 |
| chr17 | 1100001  | 1200000  | 911  | 863  | 1150000  | 0.274054 | 0.000278 | 0 |
| chr17 | 1150001  | 1250000  | 916  | 851  | 1200000  | 0.302152 | 7.15E-05 | 0 |
| chr17 | 1200001  | 1300000  | 906  | 869  | 1250000  | 0.256118 | 0.000623 | 0 |
| chr17 | 1250001  | 1350000  | 868  | 826  | 1300000  | 0.267516 | 0.000375 | 0 |
| chr17 | 1300001  | 1400000  | 1019 | 876  | 1350000  | 0.414114 | 1.08E-07 | 0 |
| chr17 | 1350001  | 1450000  | 1178 | 1027 | 1400000  | 0.393866 | 3.97E-07 | 0 |
| chr17 | 1400001  | 1500000  | 1082 | 1027 | 1450000  | 0.271227 | 0.000316 | 0 |
| chr17 | 1850001  | 1950000  | 1060 | 975  | 1900000  | 0.316553 | 3.42E-05 | 0 |
| chr17 | 1900001  | 2000000  | 1171 | 1117 | 1950000  | 0.264075 | 0.000438 | 0 |
| chr17 | 2200001  | 2300000  | 1075 | 1039 | 2250000  | 0.245104 | 0.000999 | 0 |
| chr17 | 2250001  | 2350000  | 1075 | 1068 | 2300000  | 0.205388 | 0.004773 | 0 |
| chr17 | 2550001  | 2650000  | 955  | 950  | 2600000  | 0.203536 | 0.005106 | 0 |
| chr17 | 2600001  | 2700000  | 977  | 983  | 2650000  | 0.18713  | 0.009086 | 0 |
| chr17 | 3550001  | 3650000  | 1002 | 967  | 3600000  | 0.247258 | 0.000912 | 0 |
| chr17 | 3600001  | 3700000  | 947  | 887  | 3650000  | 0.290393 | 0.000128 | 0 |
| chr17 | 3800001  | 3900000  | 1111 | 1093 | 3850000  | 0.219528 | 0.002807 | 0 |
| chr17 | 3850001  | 3950000  | 1061 | 1010 | 3900000  | 0.267032 | 0.000383 | 0 |
| chr17 | 4150001  | 4250000  | 968  | 935  | 4200000  | 0.246004 | 0.000962 | 0 |



|       |          |          |      |      |          |          |          |   |
|-------|----------|----------|------|------|----------|----------|----------|---|
| chr17 | 4200001  | 4300000  | 902  | 860  | 4250000  | 0.264754 | 0.000424 | 0 |
| chr17 | 4550001  | 4650000  | 1008 | 973  | 4600000  | 0.246947 | 0.000924 | 0 |
| chr17 | 4600001  | 4700000  | 945  | 892  | 4650000  | 0.279234 | 0.000218 | 0 |
| chr17 | 4800001  | 4900000  | 1099 | 1042 | 4850000  | 0.272799 | 0.000294 | 0 |
| chr17 | 4850001  | 4950000  | 1069 | 1057 | 4900000  | 0.21225  | 0.003702 | 0 |
| chr17 | 5300001  | 5400000  | 1007 | 960  | 5350000  | 0.26492  | 0.000421 | 0 |
| chr17 | 5350001  | 5450000  | 970  | 967  | 5400000  | 0.200432 | 0.005711 | 0 |
| chr17 | 5550001  | 5650000  | 923  | 920  | 5600000  | 0.20066  | 0.005665 | 0 |
| chr17 | 6850001  | 6950000  | 981  | 964  | 6900000  | 0.221183 | 0.002633 | 0 |
| chr17 | 6900001  | 7000000  | 1030 | 993  | 6950000  | 0.248742 | 0.000856 | 0 |
| chr17 | 7100001  | 7200000  | 1084 | 1049 | 7150000  | 0.243313 | 0.001078 | 0 |
| chr17 | 7150001  | 7250000  | 1079 | 1021 | 7200000  | 0.275675 | 0.000258 | 0 |
| chr17 | 7200001  | 7300000  | 1104 | 1018 | 7250000  | 0.312966 | 4.12E-05 | 0 |
| chr17 | 7250001  | 7350000  | 1157 | 1051 | 7300000  | 0.334589 | 1.30E-05 | 0 |
| chr17 | 7300001  | 7400000  | 1139 | 1064 | 7350000  | 0.294233 | 0.000106 | 0 |
| chr17 | 7400001  | 7500000  | 1018 | 994  | 7450000  | 0.230383 | 0.001832 | 0 |
| chr17 | 7450001  | 7550000  | 983  | 982  | 7500000  | 0.197431 | 0.006356 | 0 |
| chr17 | 7600001  | 7700000  | 1024 | 999  | 7650000  | 0.231622 | 0.001743 | 0 |
| chr17 | 7650001  | 7750000  | 1075 | 1027 | 7700000  | 0.261864 | 0.000483 | 0 |
| chr17 | 7700001  | 7800000  | 1165 | 1159 | 7750000  | 0.203412 | 0.005129 | 0 |
| chr17 | 7950001  | 8050000  | 1175 | 1157 | 8.00E+06 | 0.218235 | 0.00295  | 0 |
| chr17 | 8000001  | 8100000  | 1141 | 1016 | 8050000  | 0.363361 | 2.54E-06 | 0 |
| chr17 | 8050001  | 8150000  | 1043 | 976  | 8100000  | 0.291749 | 0.00012  | 0 |
| chr17 | 8100001  | 8200000  | 1003 | 1007 | 8150000  | 0.190221 | 0.008175 | 0 |
| chr17 | 8150001  | 8250000  | 953  | 954  | 8200000  | 0.19445  | 0.007059 | 0 |
| chr17 | 9300001  | 9400000  | 804  | 781  | 9350000  | 0.237836 | 0.001353 | 0 |
| chr17 | 12250001 | 12350000 | 691  | 902  | 12300000 | -0.18848 | 0.009181 | 0 |
| chr17 | 14300001 | 14400000 | 615  | 809  | 14350000 | -0.19959 | 0.006288 | 0 |
| chr17 | 15550001 | 15650000 | 369  | 358  | 15600000 | 0.239624 | 0.001257 | 0 |
| chr17 | 15600001 | 15700000 | 260  | 254  | 15650000 | 0.229646 | 0.001886 | 0 |
| chr17 | 16300001 | 16400000 | 1057 | 1058 | 16350000 | 0.194599 | 0.007022 | 0 |
| chr17 | 16350001 | 16450000 | 1062 | 1053 | 16400000 | 0.208241 | 0.004298 | 0 |
| chr17 | 16650001 | 16750000 | 96   | 86   | 16700000 | 0.354661 | 4.21E-06 | 0 |
| chr17 | 17000001 | 17100000 | 1176 | 1185 | 17050000 | 0.184964 | 0.009776 | 0 |
| chr17 | 17050001 | 17150000 | 1086 | 1069 | 17100000 | 0.218725 | 0.002895 | 0 |
| chr17 | 17350001 | 17450000 | 1166 | 1150 | 17400000 | 0.215897 | 0.003226 | 0 |
| chr17 | 17400001 | 17500000 | 1207 | 1187 | 17450000 | 0.220069 | 0.002749 | 0 |
| chr17 | 17450001 | 17550000 | 1017 | 1014 | 17500000 | 0.200225 | 0.005754 | 0 |
| chr17 | 17500001 | 17600000 | 1021 | 1016 | 17550000 | 0.203045 | 0.005198 | 0 |
| chr17 | 18050001 | 18150000 | 1147 | 1136 | 18100000 | 0.209866 | 0.004047 | 0 |
| chr17 | 18100001 | 18200000 | 1116 | 1120 | 18150000 | 0.190801 | 0.008013 | 0 |
| chr17 | 18300001 | 18400000 | 44   | 30   | 18350000 | 0.748504 | 4.59E-20 | 0 |
| chr17 | 18350001 | 18450000 | 35   | 23   | 18400000 | 0.801684 | 1.79E-22 | 0 |
| chr17 | 18500001 | 18600000 | 109  | 103  | 18550000 | 0.277647 | 0.000235 | 0 |
| chr17 | 18550001 | 18650000 | 115  | 108  | 18600000 | 0.286566 | 0.000154 | 0 |
| chr17 | 18600001 | 18700000 | 151  | 145  | 18650000 | 0.254459 | 0.000669 | 0 |
| chr17 | 18650001 | 18750000 | 125  | 121  | 18700000 | 0.242884 | 0.001097 | 0 |

|       |          |          |      |      |          |          |          |   |
|-------|----------|----------|------|------|----------|----------|----------|---|
| chr17 | 18850001 | 18950000 | 1019 | 966  | 18900000 | 0.273022 | 0.000291 | 0 |
| chr17 | 18900001 | 19000000 | 381  | 369  | 18950000 | 0.242133 | 0.001132 | 0 |
| chr17 | 18950001 | 19050000 | 7    | 7    | 1.90E+07 | 0.195963 | 0.006694 | 0 |
| chr17 | 19000001 | 19100000 | 3    | 3    | 19050000 | 0.195963 | 0.006694 | 0 |
| chr17 | 19050001 | 19150000 | 95   | 68   | 19100000 | 0.678356 | 4.78E-17 | 0 |
| chr17 | 20050001 | 20150000 | 974  | 968  | 20100000 | 0.204878 | 0.004863 | 0 |
| chr17 | 20200001 | 20300000 | 244  | 233  | 20250000 | 0.262514 | 0.000469 | 0 |
| chr17 | 20250001 | 20350000 | 33   | 30   | 20300000 | 0.333467 | 1.38E-05 | 0 |
| chr17 | 20300001 | 20400000 | 31   | 51   | 20350000 | -0.52227 | 1.15E-10 | 0 |
| chr17 | 20750001 | 20850000 | 532  | 521  | 20800000 | 0.226106 | 0.002171 | 0 |
| chr17 | 22050001 | 22150000 | 303  | 397  | 22100000 | -0.19386 | 0.00766  | 0 |
| chr17 | 25800001 | 25900000 | 1158 | 1132 | 25850000 | 0.228724 | 0.001957 | 0 |
| chr17 | 25850001 | 25950000 | 1142 | 1128 | 25900000 | 0.213759 | 0.003498 | 0 |
| chr17 | 26650001 | 26750000 | 1146 | 1079 | 26700000 | 0.282875 | 0.000184 | 0 |
| chr17 | 26700001 | 26800000 | 960  | 925  | 26750000 | 0.249544 | 0.000828 | 0 |
| chr17 | 26750001 | 26850000 | 1055 | 1037 | 26800000 | 0.22079  | 0.002673 | 0 |
| chr17 | 26800001 | 26900000 | 1188 | 1189 | 26850000 | 0.194749 | 0.006985 | 0 |
| chr17 | 26900001 | 27000000 | 1016 | 977  | 26950000 | 0.252433 | 0.000731 | 0 |
| chr17 | 26950001 | 27050000 | 1069 | 1072 | 2.70E+07 | 0.19192  | 0.007709 | 0 |
| chr17 | 27150001 | 27250000 | 1043 | 1050 | 27200000 | 0.186313 | 0.009341 | 0 |
| chr17 | 27200001 | 27300000 | 1211 | 1162 | 27250000 | 0.255552 | 0.000638 | 0 |
| chr17 | 27250001 | 27350000 | 1207 | 1168 | 27300000 | 0.243348 | 0.001076 | 0 |
| chr17 | 27400001 | 27500000 | 1322 | 1246 | 27450000 | 0.281381 | 0.000197 | 0 |
| chr17 | 27600001 | 27700000 | 840  | 843  | 27650000 | 0.19082  | 0.008008 | 0 |
| chr17 | 27650001 | 27750000 | 904  | 811  | 27700000 | 0.352584 | 4.75E-06 | 0 |
| chr17 | 27700001 | 27800000 | 903  | 848  | 27750000 | 0.286625 | 0.000153 | 0 |
| chr17 | 27850001 | 27950000 | 1143 | 1143 | 27900000 | 0.195963 | 0.006694 | 0 |
| chr17 | 30150001 | 30250000 | 867  | 839  | 30200000 | 0.243324 | 0.001077 | 0 |
| chr17 | 30200001 | 30300000 | 559  | 563  | 30250000 | 0.185676 | 0.009544 | 0 |
| chr17 | 30400001 | 30500000 | 622  | 604  | 30450000 | 0.238329 | 0.001326 | 0 |
| chr17 | 30450001 | 30550000 | 814  | 796  | 30500000 | 0.228223 | 0.001997 | 0 |
| chr17 | 30600001 | 30700000 | 940  | 899  | 30650000 | 0.260303 | 0.000518 | 0 |
| chr17 | 30650001 | 30750000 | 851  | 827  | 30700000 | 0.237235 | 0.001387 | 0 |
| chr17 | 32250001 | 32350000 | 735  | 970  | 32300000 | -0.20428 | 0.005334 | 0 |
| chr17 | 34500001 | 34600000 | 1    | 2    | 34550000 | -0.80404 | 3.29E-21 | 0 |
| chr17 | 34550001 | 34650000 | 1    | 6    | 34600000 | -2.389   | 7.64E-88 | 0 |
| chr17 | 34600001 | 34700000 | 1    | 6    | 34650000 | -2.389   | 7.64E-88 | 0 |
| chr17 | 34650001 | 34750000 | 3    | 1    | 34700000 | 1.780926 | 4.68E-73 | 0 |
| chr17 | 34750001 | 34850000 | 370  | 373  | 34800000 | 0.184313 | 0.009992 | 0 |
| chr17 | 34800001 | 34900000 | 875  | 839  | 34850000 | 0.256575 | 0.00061  | 0 |
| chr17 | 34850001 | 34950000 | 917  | 873  | 34900000 | 0.266903 | 0.000385 | 0 |
| chr17 | 35550001 | 35650000 | 963  | 956  | 35600000 | 0.206488 | 0.004585 | 0 |
| chr17 | 35800001 | 35900000 | 864  | 870  | 35850000 | 0.185979 | 0.009447 | 0 |
| chr17 | 36250001 | 36350000 | 101  | 98   | 36300000 | 0.239465 | 0.001265 | 0 |
| chr17 | 36400001 | 36500000 | 477  | 465  | 36450000 | 0.232722 | 0.001667 | 0 |
| chr17 | 36550001 | 36650000 | 969  | 939  | 36600000 | 0.241335 | 0.001171 | 0 |
| chr17 | 36600001 | 36700000 | 717  | 675  | 36650000 | 0.283049 | 0.000182 | 0 |

|       |          |          |      |      |          |          |          |   |
|-------|----------|----------|------|------|----------|----------|----------|---|
| chr17 | 36650001 | 36750000 | 979  | 951  | 36700000 | 0.237827 | 0.001354 | 0 |
| chr17 | 36700001 | 36800000 | 1132 | 1094 | 36750000 | 0.245224 | 0.000994 | 0 |
| chr17 | 36800001 | 36900000 | 1091 | 1084 | 36850000 | 0.205249 | 0.004797 | 0 |
| chr17 | 36850001 | 36950000 | 1158 | 1106 | 36900000 | 0.262247 | 0.000475 | 0 |
| chr17 | 37050001 | 37150000 | 905  | 903  | 37100000 | 0.199155 | 0.005978 | 0 |
| chr17 | 37100001 | 37200000 | 834  | 819  | 37150000 | 0.222147 | 0.002536 | 0 |
| chr17 | 37300001 | 37400000 | 1144 | 1089 | 37350000 | 0.267046 | 0.000383 | 0 |
| chr17 | 37350001 | 37450000 | 1054 | 991  | 37400000 | 0.284881 | 0.000167 | 0 |
| chr17 | 37550001 | 37650000 | 774  | 773  | 37600000 | 0.197828 | 0.006267 | 0 |
| chr17 | 37850001 | 37950000 | 1135 | 1100 | 37900000 | 0.241152 | 0.00118  | 0 |
| chr17 | 38200001 | 38300000 | 1125 | 1115 | 38250000 | 0.208844 | 0.004203 | 0 |
| chr17 | 38250001 | 38350000 | 1029 | 1000 | 38300000 | 0.237206 | 0.001389 | 0 |
| chr17 | 38450001 | 38550000 | 1224 | 1171 | 38500000 | 0.259826 | 0.000529 | 0 |
| chr17 | 38600001 | 38700000 | 1189 | 1127 | 38650000 | 0.273224 | 0.000288 | 0 |
| chr17 | 39850001 | 39950000 | 1028 | 1033 | 39900000 | 0.188963 | 0.008535 | 0 |
| chr17 | 39900001 | 40000000 | 1085 | 1024 | 39950000 | 0.279442 | 0.000216 | 0 |
| chr17 | 39950001 | 40050000 | 1007 | 982  | 4.00E+07 | 0.232232 | 0.0017   | 0 |
| chr17 | 40050001 | 40150000 | 1063 | 1029 | 40100000 | 0.242862 | 0.001098 | 0 |
| chr17 | 40300001 | 40400000 | 1015 | 971  | 40350000 | 0.2599   | 0.000527 | 0 |
| chr17 | 40350001 | 40450000 | 969  | 920  | 40400000 | 0.270826 | 0.000322 | 0 |
| chr17 | 40500001 | 40600000 | 916  | 915  | 40550000 | 0.197539 | 0.006331 | 0 |
| chr17 | 40550001 | 40650000 | 885  | 888  | 40600000 | 0.191081 | 0.007936 | 0 |
| chr17 | 40600001 | 40700000 | 958  | 954  | 40650000 | 0.201999 | 0.005398 | 0 |
| chr17 | 40650001 | 40750000 | 1050 | 988  | 40700000 | 0.283769 | 0.000176 | 0 |
| chr17 | 40800001 | 40900000 | 1023 | 967  | 40850000 | 0.277181 | 0.00024  | 0 |
| chr17 | 40950001 | 41050000 | 1033 | 1010 | 4.10E+07 | 0.228448 | 0.001979 | 0 |
| chr17 | 41300001 | 41400000 | 986  | 943  | 41350000 | 0.260293 | 0.000518 | 0 |
| chr17 | 41350001 | 41450000 | 1340 | 1254 | 41400000 | 0.291659 | 0.00012  | 0 |
| chr17 | 41400001 | 41500000 | 1217 | 1223 | 41450000 | 0.188868 | 0.008563 | 0 |
| chr17 | 42050001 | 42150000 | 925  | 906  | 42100000 | 0.225905 | 0.002189 | 0 |
| chr17 | 42100001 | 42200000 | 1025 | 1003 | 42150000 | 0.227265 | 0.002074 | 0 |
| chr17 | 42150001 | 42250000 | 1028 | 1010 | 42200000 | 0.221448 | 0.002606 | 0 |
| chr17 | 42200001 | 42300000 | 1035 | 978  | 42250000 | 0.277687 | 0.000234 | 0 |
| chr17 | 42250001 | 42350000 | 1093 | 1046 | 42300000 | 0.259374 | 0.00054  | 0 |
| chr17 | 42350001 | 42450000 | 1023 | 1027 | 42400000 | 0.190333 | 0.008143 | 0 |
| chr17 | 42400001 | 42500000 | 1044 | 1003 | 42450000 | 0.253763 | 0.00069  | 0 |
| chr17 | 42550001 | 42650000 | 892  | 870  | 42600000 | 0.231991 | 0.001717 | 0 |
| chr17 | 43000001 | 43100000 | 1150 | 1114 | 43050000 | 0.241848 | 0.001146 | 0 |
| chr17 | 43050001 | 43150000 | 1074 | 1030 | 43100000 | 0.256313 | 0.000617 | 0 |
| chr17 | 43100001 | 43200000 | 1038 | 996  | 43150000 | 0.255552 | 0.000638 | 0 |
| chr17 | 43150001 | 43250000 | 1083 | 1023 | 43200000 | 0.27819  | 0.000229 | 0 |
| chr17 | 43200001 | 43300000 | 912  | 886  | 43250000 | 0.23769  | 0.001361 | 0 |
| chr17 | 43300001 | 43400000 | 1214 | 1193 | 43350000 | 0.221137 | 0.002637 | 0 |
| chr17 | 43350001 | 43450000 | 1104 | 1069 | 43400000 | 0.242441 | 0.001118 | 0 |
| chr17 | 44400001 | 44500000 | 7    | 7    | 44450000 | 0.195963 | 0.006694 | 0 |
| chr17 | 44600001 | 44700000 | 6    | 6    | 44650000 | 0.195963 | 0.006694 | 0 |
| chr17 | 44650001 | 44750000 | 6    | 5    | 44700000 | 0.458997 | 5.01E-09 | 0 |

|       |          |          |      |      |          |          |          |   |
|-------|----------|----------|------|------|----------|----------|----------|---|
| chr17 | 45000001 | 45100000 | 908  | 893  | 45050000 | 0.219995 | 0.002757 | 0 |
| chr17 | 45600001 | 45700000 | 351  | 342  | 45650000 | 0.233438 | 0.001619 | 0 |
| chr17 | 45650001 | 45750000 | 752  | 744  | 45700000 | 0.211393 | 0.003823 | 0 |
| chr17 | 46050001 | 46150000 | 1078 | 1082 | 46100000 | 0.19062  | 0.008063 | 0 |
| chr17 | 46100001 | 46200000 | 931  | 905  | 46150000 | 0.236826 | 0.00141  | 0 |
| chr17 | 46650001 | 46750000 | 1219 | 1162 | 46700000 | 0.265051 | 0.000419 | 0 |
| chr17 | 47000001 | 47100000 | 925  | 923  | 47050000 | 0.199086 | 0.005993 | 0 |
| chr17 | 47200001 | 47300000 | 878  | 878  | 47250000 | 0.195963 | 0.006694 | 0 |
| chr17 | 47250001 | 47350000 | 982  | 939  | 47300000 | 0.260561 | 0.000512 | 0 |
| chr17 | 47900001 | 48000000 | 1185 | 1188 | 47950000 | 0.192315 | 0.007604 | 0 |
| chr17 | 47950001 | 48050000 | 1218 | 1158 | 4.80E+07 | 0.268842 | 0.000353 | 0 |
| chr17 | 48000001 | 48100000 | 1182 | 1148 | 48050000 | 0.23807  | 0.00134  | 0 |
| chr17 | 48050001 | 48150000 | 1207 | 1210 | 48100000 | 0.192382 | 0.007587 | 0 |
| chr17 | 48150001 | 48250000 | 1319 | 1285 | 48200000 | 0.233639 | 0.001606 | 0 |
| chr17 | 48200001 | 48300000 | 1345 | 1254 | 48250000 | 0.297032 | 9.23E-05 | 0 |
| chr17 | 48250001 | 48350000 | 1138 | 1125 | 48300000 | 0.212539 | 0.003662 | 0 |
| chr17 | 48400001 | 48500000 | 988  | 945  | 48450000 | 0.26016  | 0.000521 | 0 |
| chr17 | 48450001 | 48550000 | 988  | 953  | 48500000 | 0.247998 | 0.000884 | 0 |
| chr17 | 48600001 | 48700000 | 1336 | 1317 | 48650000 | 0.216628 | 0.003137 | 0 |
| chr17 | 48650001 | 48750000 | 1251 | 1230 | 48700000 | 0.220387 | 0.002715 | 0 |
| chr17 | 48700001 | 48800000 | 1111 | 1107 | 48750000 | 0.201167 | 0.005562 | 0 |
| chr17 | 48900001 | 49000000 | 1044 | 1029 | 48950000 | 0.216842 | 0.003112 | 0 |
| chr17 | 50000001 | 50100000 | 645  | 857  | 50050000 | -0.21403 | 0.003751 | 0 |
| chr17 | 50050001 | 50150000 | 649  | 867  | 50100000 | -0.22185 | 0.002804 | 0 |
| chr17 | 51100001 | 51200000 | 582  | 777  | 51150000 | -0.22093 | 0.002903 | 0 |
| chr17 | 52250001 | 52350000 | 599  | 797  | 52300000 | -0.21606 | 0.003481 | 0 |
| chr17 | 54850001 | 54950000 | 1051 | 1052 | 54900000 | 0.194591 | 0.007024 | 0 |
| chr17 | 54900001 | 55000000 | 986  | 994  | 54950000 | 0.184305 | 0.009995 | 0 |
| chr17 | 55450001 | 55550000 | 1121 | 1107 | 55500000 | 0.214094 | 0.003454 | 0 |
| chr17 | 56550001 | 56650000 | 999  | 1005 | 56600000 | 0.187324 | 0.009026 | 0 |
| chr17 | 57350001 | 57450000 | 930  | 928  | 57400000 | 0.199069 | 0.005996 | 0 |
| chr17 | 57400001 | 57500000 | 998  | 993  | 57450000 | 0.203209 | 0.005167 | 0 |
| chr17 | 57600001 | 57700000 | 640  | 644  | 57650000 | 0.186974 | 0.009134 | 0 |
| chr17 | 58050001 | 58150000 | 375  | 495  | 58100000 | -0.20457 | 0.005278 | 0 |
| chr17 | 58150001 | 58250000 | 852  | 835  | 58200000 | 0.22504  | 0.002265 | 0 |
| chr17 | 58200001 | 58300000 | 640  | 643  | 58250000 | 0.189216 | 0.008462 | 0 |
| chr17 | 59400001 | 59500000 | 1091 | 1092 | 59450000 | 0.194641 | 0.007012 | 0 |
| chr17 | 59450001 | 59550000 | 1108 | 1100 | 59500000 | 0.206417 | 0.004597 | 0 |
| chr17 | 61450001 | 61550000 | 1035 | 1008 | 61500000 | 0.234098 | 0.001577 | 0 |
| chr17 | 61550001 | 61650000 | 1155 | 1162 | 61600000 | 0.187246 | 0.00905  | 0 |
| chr17 | 61600001 | 61700000 | 1029 | 1037 | 61650000 | 0.18479  | 0.009833 | 0 |
| chr17 | 61800001 | 61900000 | 936  | 942  | 61850000 | 0.186745 | 0.009205 | 0 |
| chr17 | 61850001 | 61950000 | 937  | 895  | 61900000 | 0.262124 | 0.000477 | 0 |
| chr17 | 61900001 | 62000000 | 625  | 616  | 61950000 | 0.216889 | 0.003106 | 0 |
| chr17 | 61950001 | 62050000 | 765  | 733  | 6.20E+07 | 0.25761  | 0.000583 | 0 |
| chr17 | 62000001 | 62100000 | 1136 | 1114 | 62050000 | 0.224177 | 0.002343 | 0 |
| chr17 | 62500001 | 62600000 | 942  | 947  | 62550000 | 0.188326 | 0.008723 | 0 |

|       |          |          |     |     |          |          |          |   |
|-------|----------|----------|-----|-----|----------|----------|----------|---|
| chr17 | 62550001 | 62650000 | 877 | 877 | 62600000 | 0.195963 | 0.006694 | 0 |
| chr17 | 62600001 | 62700000 | 831 | 801 | 62650000 | 0.249009 | 0.000847 | 0 |
| chr17 | 62750001 | 62850000 | 345 | 321 | 62800000 | 0.299986 | 7.97E-05 | 0 |
| chr17 | 62800001 | 62900000 | 70  | 64  | 62850000 | 0.325246 | 2.16E-05 | 0 |
| chr17 | 65900001 | 66000000 | 512 | 489 | 65950000 | 0.262272 | 0.000474 | 0 |
| chr17 | 65950001 | 66050000 | 511 | 447 | 6.60E+07 | 0.389011 | 5.38E-07 | 0 |
| chr17 | 66000001 | 66100000 | 454 | 420 | 66050000 | 0.308266 | 5.24E-05 | 0 |
| chr17 | 67550001 | 67650000 | 499 | 655 | 67600000 | -0.19649 | 0.007    | 0 |
| chr17 | 69600001 | 69700000 | 434 | 572 | 69650000 | -0.20236 | 0.005708 | 0 |
| chr17 | 69950001 | 70050000 | 479 | 629 | 7.00E+07 | -0.19707 | 0.006861 | 0 |
| chr17 | 71300001 | 71400000 | 771 | 729 | 71350000 | 0.276775 | 0.000245 | 0 |
| chr17 | 72350001 | 72450000 | 701 | 684 | 72400000 | 0.231381 | 0.00176  | 0 |
| chr17 | 72400001 | 72500000 | 668 | 652 | 72450000 | 0.230939 | 0.001791 | 0 |
| chr17 | 72700001 | 72800000 | 763 | 751 | 72750000 | 0.218833 | 0.002883 | 0 |
| chr17 | 72750001 | 72850000 | 826 | 826 | 72800000 | 0.195963 | 0.006694 | 0 |
| chr17 | 72800001 | 72900000 | 859 | 852 | 72850000 | 0.207768 | 0.004374 | 0 |
| chr17 | 72850001 | 72950000 | 766 | 751 | 72900000 | 0.224495 | 0.002314 | 0 |
| chr17 | 72900001 | 73000000 | 750 | 703 | 72950000 | 0.289329 | 0.000135 | 0 |
| chr17 | 72950001 | 73050000 | 735 | 668 | 7.30E+07 | 0.333859 | 1.35E-05 | 0 |
| chr17 | 73000001 | 73100000 | 684 | 665 | 73050000 | 0.236605 | 0.001423 | 0 |
| chr17 | 73050001 | 73150000 | 699 | 687 | 73100000 | 0.220945 | 0.002657 | 0 |
| chr17 | 73100001 | 73200000 | 595 | 595 | 73150000 | 0.195963 | 0.006694 | 0 |
| chr17 | 73250001 | 73350000 | 633 | 627 | 73300000 | 0.209703 | 0.004071 | 0 |
| chr17 | 73300001 | 73400000 | 677 | 643 | 73350000 | 0.2703   | 0.00033  | 0 |
| chr17 | 73350001 | 73450000 | 618 | 585 | 73400000 | 0.275133 | 0.000264 | 0 |
| chr17 | 73400001 | 73500000 | 664 | 653 | 73450000 | 0.220063 | 0.002749 | 0 |
| chr17 | 73450001 | 73550000 | 777 | 766 | 73500000 | 0.216533 | 0.003148 | 0 |
| chr17 | 73600001 | 73700000 | 823 | 786 | 73650000 | 0.262326 | 0.000473 | 0 |
| chr17 | 73650001 | 73750000 | 782 | 677 | 73700000 | 0.403976 | 2.09E-07 | 0 |
| chr17 | 73700001 | 73800000 | 742 | 673 | 73750000 | 0.336776 | 1.15E-05 | 0 |
| chr17 | 73750001 | 73850000 | 773 | 700 | 73800000 | 0.339077 | 1.02E-05 | 0 |
| chr17 | 73800001 | 73900000 | 812 | 759 | 73850000 | 0.293343 | 0.000111 | 0 |
| chr17 | 73850001 | 73950000 | 762 | 758 | 73900000 | 0.203556 | 0.005103 | 0 |
| chr17 | 74000001 | 74100000 | 732 | 715 | 74050000 | 0.229863 | 0.00187  | 0 |
| chr17 | 74200001 | 74300000 | 678 | 678 | 74250000 | 0.195963 | 0.006694 | 0 |
| chr17 | 74250001 | 74350000 | 713 | 698 | 74300000 | 0.226638 | 0.002126 | 0 |
| chr17 | 74400001 | 74500000 | 794 | 747 | 74450000 | 0.283994 | 0.000174 | 0 |
| chr17 | 74450001 | 74550000 | 838 | 771 | 74500000 | 0.316182 | 3.48E-05 | 0 |
| chr17 | 74500001 | 74600000 | 766 | 709 | 74550000 | 0.307522 | 5.45E-05 | 0 |
| chr17 | 74550001 | 74650000 | 640 | 615 | 74600000 | 0.253449 | 0.000699 | 0 |
| chr17 | 74600001 | 74700000 | 641 | 636 | 74650000 | 0.207261 | 0.004456 | 0 |
| chr17 | 74650001 | 74750000 | 706 | 646 | 74700000 | 0.324097 | 2.29E-05 | 0 |
| chr17 | 74700001 | 74800000 | 602 | 580 | 74750000 | 0.249674 | 0.000823 | 0 |
| chr17 | 74950001 | 75050000 | 688 | 690 | 7.50E+07 | 0.191775 | 0.007748 | 0 |
| chr17 | 75200001 | 75300000 | 686 | 640 | 75250000 | 0.2961   | 9.67E-05 | 0 |
| chr17 | 75250001 | 75350000 | 710 | 667 | 75300000 | 0.286095 | 0.000157 | 0 |
| chr17 | 75300001 | 75400000 | 795 | 766 | 75350000 | 0.249574 | 0.000827 | 0 |

|       |          |          |     |     |          |          |          |   |
|-------|----------|----------|-----|-----|----------|----------|----------|---|
| chr17 | 75350001 | 75450000 | 823 | 812 | 75400000 | 0.215376 | 0.00329  | 0 |
| chr17 | 75950001 | 76050000 | 706 | 688 | 7.60E+07 | 0.233223 | 0.001634 | 0 |
| chr17 | 76100001 | 76200000 | 758 | 739 | 76150000 | 0.232587 | 0.001676 | 0 |
| chr17 | 76150001 | 76250000 | 710 | 707 | 76200000 | 0.202072 | 0.005384 | 0 |
| chr17 | 76300001 | 76400000 | 721 | 719 | 76350000 | 0.199971 | 0.005806 | 0 |
| chr17 | 76350001 | 76450000 | 720 | 719 | 76400000 | 0.197968 | 0.006236 | 0 |
| chr17 | 76400001 | 76500000 | 750 | 742 | 76450000 | 0.211434 | 0.003817 | 0 |
| chr17 | 76650001 | 76750000 | 720 | 721 | 76700000 | 0.193961 | 0.007181 | 0 |
| chr17 | 76800001 | 76900000 | 738 | 739 | 76850000 | 0.194009 | 0.007169 | 0 |
| chr17 | 76850001 | 76950000 | 757 | 737 | 76900000 | 0.234592 | 0.001545 | 0 |
| chr17 | 76900001 | 77000000 | 769 | 757 | 76950000 | 0.218653 | 0.002903 | 0 |
| chr17 | 76950001 | 77050000 | 786 | 782 | 7.70E+07 | 0.203324 | 0.005146 | 0 |
| chr17 | 77000001 | 77100000 | 801 | 795 | 77050000 | 0.20681  | 0.004531 | 0 |
| chr17 | 77300001 | 77400000 | 809 | 798 | 77350000 | 0.215714 | 0.003248 | 0 |
| chr17 | 77700001 | 77800000 | 784 | 765 | 77750000 | 0.231357 | 0.001761 | 0 |
| chr17 | 77750001 | 77850000 | 838 | 837 | 77800000 | 0.197686 | 0.006299 | 0 |
| chr17 | 77850001 | 77950000 | 739 | 744 | 77900000 | 0.186235 | 0.009366 | 0 |
| chr17 | 77900001 | 78000000 | 711 | 689 | 77950000 | 0.241309 | 0.001172 | 0 |
| chr17 | 77950001 | 78050000 | 696 | 660 | 7.80E+07 | 0.272584 | 0.000297 | 0 |
| chr17 | 78000001 | 78100000 | 768 | 769 | 78050000 | 0.194086 | 0.007149 | 0 |
| chr17 | 78150001 | 78250000 | 762 | 751 | 78200000 | 0.216941 | 0.0031   | 0 |
| chr17 | 78300001 | 78400000 | 705 | 689 | 78350000 | 0.229082 | 0.001929 | 0 |
| chr17 | 78650001 | 78750000 | 713 | 711 | 78700000 | 0.200016 | 0.005797 | 0 |
| chr17 | 78700001 | 78800000 | 764 | 739 | 78750000 | 0.243961 | 0.001049 | 0 |
| chr17 | 78750001 | 78850000 | 813 | 767 | 78800000 | 0.279992 | 0.00021  | 0 |
| chr17 | 78800001 | 78900000 | 819 | 810 | 78850000 | 0.211905 | 0.00375  | 0 |
| chr17 | 78950001 | 79050000 | 838 | 817 | 7.90E+07 | 0.232577 | 0.001677 | 0 |
| chr17 | 79000001 | 79100000 | 922 | 885 | 79050000 | 0.255052 | 0.000652 | 0 |
| chr17 | 79050001 | 79150000 | 860 | 834 | 79100000 | 0.240252 | 0.001224 | 0 |
| chr17 | 79200001 | 79300000 | 854 | 852 | 79250000 | 0.199346 | 0.005937 | 0 |
| chr17 | 79250001 | 79350000 | 790 | 789 | 79300000 | 0.19779  | 0.006275 | 0 |
| chr17 | 79300001 | 79400000 | 849 | 794 | 79350000 | 0.292589 | 0.000115 | 0 |
| chr17 | 79350001 | 79450000 | 950 | 896 | 79400000 | 0.280392 | 0.000206 | 0 |
| chr17 | 79450001 | 79550000 | 825 | 780 | 79500000 | 0.276883 | 0.000243 | 0 |
| chr17 | 79500001 | 79600000 | 782 | 742 | 79550000 | 0.271712 | 0.000309 | 0 |
| chr17 | 79600001 | 79700000 | 703 | 689 | 79650000 | 0.224984 | 0.00227  | 0 |
| chr17 | 79650001 | 79750000 | 433 | 427 | 79700000 | 0.216094 | 0.003202 | 0 |
| chr17 | 79750001 | 79850000 | 679 | 668 | 79800000 | 0.219527 | 0.002807 | 0 |
| chr17 | 79800001 | 79900000 | 788 | 750 | 79850000 | 0.267268 | 0.000379 | 0 |
| chr17 | 79850001 | 79950000 | 781 | 746 | 79900000 | 0.26211  | 0.000478 | 0 |
| chr17 | 79900001 | 80000000 | 840 | 790 | 79950000 | 0.2845   | 0.00017  | 0 |
| chr17 | 79950001 | 80050000 | 942 | 877 | 8.00E+07 | 0.299113 | 8.32E-05 | 0 |
| chr17 | 80000001 | 80100000 | 670 | 663 | 80050000 | 0.211115 | 0.003863 | 0 |
| chr17 | 80100001 | 80200000 | 717 | 687 | 80150000 | 0.257626 | 0.000583 | 0 |
| chr17 | 80150001 | 80250000 | 804 | 699 | 80200000 | 0.397866 | 3.09E-07 | 0 |
| chr17 | 80300001 | 80400000 | 756 | 717 | 80350000 | 0.272376 | 0.0003   | 0 |
| chr17 | 80350001 | 80450000 | 788 | 710 | 80400000 | 0.34634  | 6.77E-06 | 0 |

|       |          |          |      |      |          |          |          |   |
|-------|----------|----------|------|------|----------|----------|----------|---|
| chr17 | 80400001 | 80500000 | 666  | 653  | 80450000 | 0.224402 | 0.002322 | 0 |
| chr17 | 80650001 | 80750000 | 664  | 660  | 80700000 | 0.20468  | 0.004898 | 0 |
| chr17 | 80700001 | 80800000 | 741  | 731  | 80750000 | 0.215565 | 0.003267 | 0 |
| chr17 | 81000001 | 81100000 | 860  | 820  | 81050000 | 0.264676 | 0.000426 | 0 |
| chr17 | 81050001 | 81150000 | 843  | 796  | 81100000 | 0.278727 | 0.000223 | 0 |
| chr17 | 81100001 | 81200000 | 457  | 439  | 81150000 | 0.253936 | 0.000685 | 0 |
| chr17 | 81150001 | 81250000 | 29   | 26   | 81200000 | 0.353504 | 4.50E-06 | 0 |
| chr17 | 200001   | 300000   | 906  | 942  | 250000   | 0.139747 | 0.038801 | 0 |
| chr17 | 250001   | 350000   | 458  | 463  | 3.00E+05 | 0.180298 | 0.01142  | 0 |
| chr17 | 500001   | 600000   | 791  | 817  | 550000   | 0.149305 | 0.02969  | 0 |
| chr17 | 850001   | 950000   | 983  | 1020 | 9.00E+05 | 0.142657 | 0.035812 | 0 |
| chr17 | 1050001  | 1150000  | 914  | 940  | 1100000  | 0.155496 | 0.024796 | 0 |
| chr17 | 1450001  | 1550000  | 1010 | 1032 | 1500000  | 0.164875 | 0.018683 | 0 |
| chr17 | 1550001  | 1650000  | 943  | 954  | 1600000  | 0.179232 | 0.011829 | 0 |
| chr17 | 1950001  | 2050000  | 1021 | 1065 | 2.00E+06 | 0.135092 | 0.044002 | 0 |
| chr17 | 2150001  | 2250000  | 911  | 953  | 2200000  | 0.130938 | 0.049107 | 0 |
| chr17 | 2300001  | 2400000  | 909  | 930  | 2350000  | 0.163013 | 0.019783 | 0 |
| chr17 | 2750001  | 2850000  | 959  | 1001 | 2800000  | 0.134124 | 0.045152 | 0 |
| chr17 | 2800001  | 2900000  | 979  | 992  | 2850000  | 0.176932 | 0.012752 | 0 |
| chr17 | 2850001  | 2950000  | 992  | 1008 | 2900000  | 0.172879 | 0.014532 | 0 |
| chr17 | 3400001  | 3500000  | 799  | 1018 | 3450000  | -0.15351 | 0.027146 | 0 |
| chr17 | 3650001  | 3750000  | 960  | 969  | 3700000  | 0.182501 | 0.010616 | 0 |
| chr17 | 3900001  | 4000000  | 1012 | 1022 | 3950000  | 0.181777 | 0.010875 | 0 |
| chr17 | 3950001  | 4050000  | 978  | 999  | 4.00E+06 | 0.165313 | 0.018433 | 0 |
| chr17 | 4400001  | 4500000  | 1174 | 1216 | 4450000  | 0.145252 | 0.033309 | 0 |
| chr17 | 4750001  | 4850000  | 1009 | 1055 | 4800000  | 0.131646 | 0.048204 | 0 |
| chr17 | 5000001  | 5100000  | 585  | 612  | 5050000  | 0.130868 | 0.049196 | 0 |
| chr17 | 5250001  | 5350000  | 953  | 993  | 5300000  | 0.136646 | 0.042207 | 0 |
| chr17 | 5600001  | 5700000  | 896  | 917  | 5650000  | 0.16254  | 0.02007  | 0 |
| chr17 | 5900001  | 6000000  | 968  | 1006 | 5950000  | 0.140412 | 0.038101 | 0 |
| chr17 | 6450001  | 6550000  | 1075 | 1120 | 6500000  | 0.136801 | 0.042031 | 0 |
| chr17 | 6500001  | 6600000  | 1009 | 1055 | 6550000  | 0.131646 | 0.048204 | 0 |
| chr17 | 6950001  | 7050000  | 882  | 912  | 7.00E+06 | 0.147708 | 0.031075 | 0 |
| chr17 | 7050001  | 7150000  | 1073 | 1098 | 7100000  | 0.162735 | 0.019951 | 0 |
| chr17 | 7350001  | 7450000  | 938  | 957  | 7400000  | 0.167032 | 0.017476 | 0 |
| chr17 | 7550001  | 7650000  | 1013 | 1027 | 7600000  | 0.176161 | 0.013075 | 0 |
| chr17 | 7750001  | 7850000  | 1176 | 1206 | 7800000  | 0.159621 | 0.021927 | 0 |
| chr17 | 7800001  | 7900000  | 1062 | 1091 | 7850000  | 0.157096 | 0.023648 | 0 |
| chr17 | 8200001  | 8300000  | 889  | 916  | 8250000  | 0.152799 | 0.026838 | 0 |
| chr17 | 9450001  | 9550000  | 765  | 791  | 9500000  | 0.147745 | 0.031042 | 0 |
| chr17 | 9500001  | 9600000  | 821  | 835  | 9550000  | 0.171569 | 0.015152 | 0 |
| chr17 | 9650001  | 9750000  | 1014 | 1051 | 9700000  | 0.144258 | 0.03425  | 0 |
| chr17 | 9950001  | 10050000 | 902  | 944  | 1.00E+07 | 0.130304 | 0.049926 | 0 |
| chr17 | 10350001 | 10450000 | 702  | 912  | 10400000 | -0.1816  | 0.01151  | 0 |
| chr17 | 11500001 | 11600000 | 711  | 909  | 11550000 | -0.15847 | 0.023508 | 0 |
| chr17 | 12900001 | 13000000 | 900  | 933  | 12950000 | 0.144011 | 0.034488 | 0 |
| chr17 | 12950001 | 13050000 | 819  | 857  | 1.30E+07 | 0.130531 | 0.049631 | 0 |

|       |          |          |      |      |          |          |          |   |
|-------|----------|----------|------|------|----------|----------|----------|---|
| chr17 | 13650001 | 13750000 | 651  | 826  | 13700000 | -0.14752 | 0.032154 | 0 |
| chr17 | 13800001 | 13900000 | 640  | 809  | 13850000 | -0.1421  | 0.037324 | 0 |
| chr17 | 13850001 | 13950000 | 604  | 772  | 13900000 | -0.15809 | 0.02377  | 0 |
| chr17 | 14150001 | 14250000 | 713  | 905  | 14200000 | -0.14805 | 0.03168  | 0 |
| chr17 | 14250001 | 14350000 | 658  | 832  | 14300000 | -0.14253 | 0.036892 | 0 |
| chr17 | 14550001 | 14650000 | 667  | 846  | 14600000 | -0.14701 | 0.032617 | 0 |
| chr17 | 14600001 | 14700000 | 700  | 890  | 14650000 | -0.15049 | 0.029584 | 0 |
| chr17 | 15000001 | 15100000 | 747  | 957  | 15050000 | -0.16145 | 0.021528 | 0 |
| chr17 | 15500001 | 15600000 | 274  | 278  | 15550000 | 0.175054 | 0.013552 | 0 |
| chr17 | 15800001 | 15900000 | 939  | 982  | 15850000 | 0.131365 | 0.048561 | 0 |
| chr17 | 15850001 | 15950000 | 965  | 981  | 15900000 | 0.172239 | 0.014832 | 0 |
| chr17 | 16000001 | 16100000 | 836  | 861  | 16050000 | 0.153453 | 0.02633  | 0 |
| chr17 | 16250001 | 16350000 | 857  | 875  | 16300000 | 0.165975 | 0.018059 | 0 |
| chr17 | 16400001 | 16500000 | 995  | 1017 | 16450000 | 0.164412 | 0.018952 | 0 |
| chr17 | 16850001 | 16950000 | 942  | 964  | 16900000 | 0.162657 | 0.019999 | 0 |
| chr17 | 17100001 | 17200000 | 937  | 972  | 17150000 | 0.143056 | 0.035418 | 0 |
| chr17 | 17150001 | 17250000 | 884  | 920  | 17200000 | 0.138376 | 0.040279 | 0 |
| chr17 | 17300001 | 17400000 | 1036 | 1078 | 17350000 | 0.13863  | 0.040001 | 0 |
| chr17 | 17550001 | 17650000 | 1223 | 1256 | 17600000 | 0.157551 | 0.023329 | 0 |
| chr17 | 17600001 | 17700000 | 1299 | 1345 | 17650000 | 0.145758 | 0.032838 | 0 |
| chr17 | 17650001 | 17750000 | 1237 | 1271 | 17700000 | 0.156845 | 0.023825 | 0 |
| chr17 | 17700001 | 17800000 | 1211 | 1247 | 17750000 | 0.1537   | 0.02614  | 0 |
| chr17 | 18150001 | 18250000 | 1011 | 1055 | 18200000 | 0.134503 | 0.044699 | 0 |
| chr17 | 18400001 | 18500000 | 22   | 28   | 18450000 | -0.15196 | 0.028373 | 0 |
| chr17 | 18700001 | 18800000 | 430  | 441  | 18750000 | 0.159521 | 0.021993 | 0 |
| chr17 | 18800001 | 18900000 | 1056 | 1103 | 18850000 | 0.13314  | 0.046345 | 0 |
| chr17 | 19100001 | 19200000 | 641  | 652  | 19150000 | 0.171415 | 0.015226 | 0 |
| chr17 | 19200001 | 19300000 | 1133 | 1184 | 19250000 | 0.132442 | 0.047207 | 0 |
| chr17 | 19500001 | 19600000 | 860  | 887  | 19550000 | 0.151366 | 0.027979 | 0 |
| chr17 | 20000001 | 20100000 | 929  | 970  | 20050000 | 0.133657 | 0.045715 | 0 |
| chr17 | 20100001 | 20200000 | 964  | 980  | 20150000 | 0.172214 | 0.014844 | 0 |
| chr17 | 20400001 | 20500000 | 98   | 101  | 20450000 | 0.152461 | 0.027103 | 0 |
| chr17 | 20500001 | 20600000 | 156  | 198  | 20550000 | -0.14799 | 0.031734 | 0 |
| chr17 | 20550001 | 20650000 | 198  | 202  | 20600000 | 0.167108 | 0.017434 | 0 |
| chr17 | 21100001 | 21200000 | 1171 | 1212 | 21150000 | 0.146314 | 0.032327 | 0 |
| chr17 | 21150001 | 21250000 | 1720 | 1793 | 21200000 | 0.135996 | 0.04295  | 0 |
| chr17 | 21200001 | 21300000 | 1808 | 1872 | 21250000 | 0.145777 | 0.03282  | 0 |
| chr17 | 21400001 | 21500000 | 559  | 582  | 21450000 | 0.137792 | 0.040921 | 0 |
| chr17 | 21550001 | 21650000 | 92   | 96   | 21600000 | 0.134562 | 0.044628 | 0 |
| chr17 | 22200001 | 22300000 | 337  | 432  | 22250000 | -0.16232 | 0.020976 | 0 |
| chr17 | 25750001 | 25850000 | 1014 | 1048 | 25800000 | 0.148382 | 0.030484 | 0 |
| chr17 | 26600001 | 26700000 | 1043 | 1061 | 26650000 | 0.171278 | 0.015292 | 0 |
| chr17 | 26850001 | 26950000 | 1059 | 1075 | 26900000 | 0.174329 | 0.013872 | 0 |
| chr17 | 27000001 | 27100000 | 1061 | 1093 | 27050000 | 0.153094 | 0.026607 | 0 |
| chr17 | 27050001 | 27150000 | 912  | 950  | 27100000 | 0.137069 | 0.041728 | 0 |
| chr17 | 27350001 | 27450000 | 1164 | 1204 | 27400000 | 0.147219 | 0.03151  | 0 |
| chr17 | 27450001 | 27550000 | 1118 | 1128 | 27500000 | 0.183116 | 0.010401 | 0 |



|       |          |          |      |      |          |          |          |   |
|-------|----------|----------|------|------|----------|----------|----------|---|
| chr17 | 28200001 | 28300000 | 825  | 852  | 28250000 | 0.149504 | 0.029521 | 0 |
| chr17 | 28900001 | 29000000 | 220  | 228  | 28950000 | 0.144433 | 0.034083 | 0 |
| chr17 | 29150001 | 29250000 | 805  | 825  | 29200000 | 0.160558 | 0.021316 | 0 |
| chr17 | 29200001 | 29300000 | 807  | 835  | 29250000 | 0.146756 | 0.031926 | 0 |
| chr17 | 29300001 | 29400000 | 616  | 637  | 29350000 | 0.1476   | 0.03117  | 0 |
| chr17 | 29350001 | 29450000 | 724  | 730  | 29400000 | 0.184056 | 0.010079 | 0 |
| chr17 | 29600001 | 29700000 | 848  | 885  | 29650000 | 0.13435  | 0.044881 | 0 |
| chr17 | 29800001 | 29900000 | 1062 | 1101 | 29850000 | 0.143932 | 0.034564 | 0 |
| chr17 | 29850001 | 29950000 | 1038 | 1078 | 29900000 | 0.141412 | 0.037067 | 0 |
| chr17 | 30100001 | 30200000 | 855  | 878  | 30150000 | 0.157667 | 0.023249 | 0 |
| chr17 | 30250001 | 30350000 | 451  | 461  | 30300000 | 0.164324 | 0.019003 | 0 |
| chr17 | 30550001 | 30650000 | 989  | 1024 | 30600000 | 0.14579  | 0.032809 | 0 |
| chr17 | 31000001 | 31100000 | 773  | 797  | 31050000 | 0.151852 | 0.027587 | 0 |
| chr17 | 32200001 | 32300000 | 676  | 878  | 32250000 | -0.18123 | 0.011647 | 0 |
| chr17 | 32300001 | 32400000 | 674  | 855  | 32350000 | -0.14721 | 0.032431 | 0 |
| chr17 | 33300001 | 33400000 | 930  | 962  | 33350000 | 0.147157 | 0.031565 | 0 |
| chr17 | 33350001 | 33450000 | 905  | 936  | 33400000 | 0.147372 | 0.031373 | 0 |
| chr17 | 33600001 | 33700000 | 658  | 843  | 33650000 | -0.16148 | 0.021506 | 0 |
| chr17 | 33850001 | 33950000 | 875  | 885  | 33900000 | 0.179569 | 0.011698 | 0 |
| chr17 | 33900001 | 34000000 | 925  | 959  | 33950000 | 0.143886 | 0.034609 | 0 |
| chr17 | 34050001 | 34150000 | 1056 | 1098 | 34100000 | 0.139695 | 0.038857 | 0 |
| chr17 | 34400001 | 34500000 | 541  | 685  | 34450000 | -0.14451 | 0.034947 | 0 |
| chr17 | 34450001 | 34550000 | 277  | 350  | 34500000 | -0.14151 | 0.037936 | 0 |
| chr17 | 34900001 | 35000000 | 938  | 975  | 34950000 | 0.140149 | 0.038377 | 0 |
| chr17 | 35250001 | 35350000 | 1067 | 1080 | 35300000 | 0.178492 | 0.012119 | 0 |
| chr17 | 35600001 | 35700000 | 866  | 883  | 35650000 | 0.167917 | 0.017    | 0 |
| chr17 | 35650001 | 35750000 | 775  | 782  | 35700000 | 0.182991 | 0.010444 | 0 |
| chr17 | 35850001 | 35950000 | 836  | 872  | 35900000 | 0.135138 | 0.043949 | 0 |
| chr17 | 35900001 | 36000000 | 851  | 886  | 35950000 | 0.137815 | 0.040895 | 0 |
| chr17 | 36750001 | 36850000 | 933  | 969  | 36800000 | 0.141343 | 0.037137 | 0 |
| chr17 | 36900001 | 37000000 | 916  | 948  | 36950000 | 0.146424 | 0.032227 | 0 |
| chr17 | 36950001 | 37050000 | 852  | 890  | 3.70E+07 | 0.133011 | 0.046503 | 0 |
| chr17 | 37150001 | 37250000 | 948  | 990  | 37200000 | 0.133422 | 0.046001 | 0 |
| chr17 | 37400001 | 37500000 | 840  | 872  | 37450000 | 0.142024 | 0.036446 | 0 |
| chr17 | 37700001 | 37800000 | 1157 | 1175 | 37750000 | 0.173691 | 0.014159 | 0 |
| chr17 | 37750001 | 37850000 | 1237 | 1268 | 37800000 | 0.160254 | 0.021512 | 0 |
| chr17 | 37800001 | 37900000 | 1179 | 1225 | 37850000 | 0.140745 | 0.037754 | 0 |
| chr17 | 37900001 | 38000000 | 991  | 1015 | 37950000 | 0.16144  | 0.020754 | 0 |
| chr17 | 38100001 | 38200000 | 1055 | 1081 | 38150000 | 0.16084  | 0.021135 | 0 |
| chr17 | 38300001 | 38400000 | 844  | 882  | 38350000 | 0.132427 | 0.047225 | 0 |
| chr17 | 38500001 | 38600000 | 1074 | 1098 | 38550000 | 0.164079 | 0.019147 | 0 |
| chr17 | 38650001 | 38750000 | 1070 | 1097 | 38700000 | 0.16001  | 0.021671 | 0 |
| chr17 | 39150001 | 39250000 | 843  | 875  | 39200000 | 0.142213 | 0.036256 | 0 |
| chr17 | 39650001 | 39750000 | 1122 | 1157 | 39700000 | 0.151647 | 0.027751 | 0 |
| chr17 | 39700001 | 39800000 | 948  | 961  | 39750000 | 0.176314 | 0.013011 | 0 |
| chr17 | 40000001 | 40100000 | 1011 | 1023 | 40050000 | 0.17894  | 0.011943 | 0 |
| chr17 | 40100001 | 40200000 | 1006 | 1047 | 40150000 | 0.138332 | 0.040326 | 0 |

|       |          |          |      |      |          |          |          |   |
|-------|----------|----------|------|------|----------|----------|----------|---|
| chr17 | 40250001 | 40350000 | 1096 | 1110 | 40300000 | 0.177651 | 0.012457 | 0 |
| chr17 | 40400001 | 40500000 | 957  | 978  | 40450000 | 0.164647 | 0.018815 | 0 |
| chr17 | 40450001 | 40550000 | 912  | 933  | 40500000 | 0.16312  | 0.019718 | 0 |
| chr17 | 40700001 | 40800000 | 920  | 932  | 40750000 | 0.177267 | 0.012614 | 0 |
| chr17 | 40750001 | 40850000 | 968  | 1011 | 40800000 | 0.133259 | 0.046199 | 0 |
| chr17 | 40850001 | 40950000 | 993  | 1032 | 40900000 | 0.140386 | 0.038128 | 0 |
| chr17 | 40900001 | 41000000 | 1082 | 1132 | 40950000 | 0.13079  | 0.049297 | 0 |
| chr17 | 41550001 | 41650000 | 1022 | 1043 | 41600000 | 0.166619 | 0.017702 | 0 |
| chr17 | 41600001 | 41700000 | 987  | 1026 | 41650000 | 0.140054 | 0.038476 | 0 |
| chr17 | 41700001 | 41800000 | 1035 | 1075 | 41750000 | 0.141257 | 0.037226 | 0 |
| chr17 | 41750001 | 41850000 | 1087 | 1115 | 41800000 | 0.159271 | 0.022159 | 0 |
| chr17 | 41800001 | 41900000 | 1033 | 1063 | 41850000 | 0.154662 | 0.025413 | 0 |
| chr17 | 41850001 | 41950000 | 1017 | 1048 | 41900000 | 0.152644 | 0.026959 | 0 |
| chr17 | 42000001 | 42100000 | 948  | 959  | 42050000 | 0.179319 | 0.011795 | 0 |
| chr17 | 42300001 | 42400000 | 993  | 1024 | 42350000 | 0.151613 | 0.027779 | 0 |
| chr17 | 42950001 | 43050000 | 1084 | 1104 | 4.30E+07 | 0.169588 | 0.016132 | 0 |
| chr17 | 43250001 | 43350000 | 1024 | 1058 | 43300000 | 0.148839 | 0.030088 | 0 |
| chr17 | 43400001 | 43500000 | 1031 | 1077 | 43450000 | 0.132989 | 0.04653  | 0 |
| chr17 | 43600001 | 43700000 | 226  | 235  | 43650000 | 0.139625 | 0.038931 | 0 |
| chr17 | 43750001 | 43850000 | 1063 | 1111 | 43800000 | 0.132246 | 0.047451 | 0 |
| chr17 | 43800001 | 43900000 | 1131 | 1166 | 43850000 | 0.151994 | 0.027473 | 0 |
| chr17 | 44100001 | 44200000 | 1151 | 1189 | 44150000 | 0.149102 | 0.029863 | 0 |
| chr17 | 44150001 | 44250000 | 1481 | 1517 | 44200000 | 0.161314 | 0.020833 | 0 |
| chr17 | 44200001 | 44300000 | 1505 | 1566 | 44250000 | 0.138642 | 0.039988 | 0 |
| chr17 | 44350001 | 44450000 | 95   | 98   | 44400000 | 0.151109 | 0.028187 | 0 |
| chr17 | 44950001 | 45050000 | 1050 | 1073 | 4.50E+07 | 0.164702 | 0.018783 | 0 |
| chr17 | 45300001 | 45400000 | 1115 | 1136 | 45350000 | 0.169044 | 0.01641  | 0 |
| chr17 | 45500001 | 45600000 | 275  | 351  | 45550000 | -0.15608 | 0.025207 | 0 |
| chr17 | 45850001 | 45950000 | 1191 | 1218 | 45900000 | 0.163622 | 0.019417 | 0 |
| chr17 | 46150001 | 46250000 | 881  | 913  | 46200000 | 0.14449  | 0.034029 | 0 |
| chr17 | 46600001 | 46700000 | 1191 | 1242 | 46650000 | 0.135471 | 0.043559 | 0 |
| chr17 | 46700001 | 46800000 | 1039 | 1054 | 46750000 | 0.175284 | 0.013452 | 0 |
| chr17 | 47050001 | 47150000 | 983  | 1022 | 47100000 | 0.139831 | 0.038712 | 0 |
| chr17 | 47150001 | 47250000 | 822  | 857  | 47200000 | 0.135806 | 0.04317  | 0 |
| chr17 | 47300001 | 47400000 | 891  | 908  | 47350000 | 0.168696 | 0.01659  | 0 |
| chr17 | 47600001 | 47700000 | 1045 | 1093 | 47650000 | 0.131173 | 0.048806 | 0 |
| chr17 | 48100001 | 48200000 | 1259 | 1272 | 48150000 | 0.181143 | 0.011106 | 0 |
| chr17 | 48350001 | 48450000 | 1061 | 1091 | 48400000 | 0.155737 | 0.02462  | 0 |
| chr17 | 49050001 | 49150000 | 912  | 939  | 49100000 | 0.153872 | 0.026009 | 0 |
| chr17 | 49350001 | 49450000 | 802  | 822  | 49400000 | 0.160427 | 0.0214   | 0 |
| chr17 | 49400001 | 49500000 | 922  | 959  | 49450000 | 0.139199 | 0.039386 | 0 |
| chr17 | 50500001 | 50600000 | 618  | 783  | 50550000 | -0.14544 | 0.034063 | 0 |
| chr17 | 50950001 | 51050000 | 594  | 770  | 5.10E+07 | -0.17843 | 0.012746 | 0 |
| chr17 | 51400001 | 51500000 | 591  | 747  | 51450000 | -0.14199 | 0.037444 | 0 |
| chr17 | 51800001 | 51900000 | 548  | 697  | 51850000 | -0.15102 | 0.029141 | 0 |
| chr17 | 51950001 | 52050000 | 602  | 783  | 5.20E+07 | -0.18329 | 0.010896 | 0 |
| chr17 | 52000001 | 52100000 | 649  | 836  | 52050000 | -0.16932 | 0.016965 | 0 |

|       |          |          |      |      |          |          |          |   |
|-------|----------|----------|------|------|----------|----------|----------|---|
| chr17 | 52700001 | 52800000 | 533  | 688  | 52750000 | -0.17231 | 0.015465 | 0 |
| chr17 | 52750001 | 52850000 | 584  | 743  | 52800000 | -0.15143 | 0.028803 | 0 |
| chr17 | 52800001 | 52900000 | 638  | 807  | 52850000 | -0.14305 | 0.036376 | 0 |
| chr17 | 54000001 | 54100000 | 628  | 789  | 54050000 | -0.1333  | 0.047175 | 0 |
| chr17 | 54050001 | 54150000 | 650  | 837  | 54100000 | -0.16882 | 0.017226 | 0 |
| chr17 | 55500001 | 55600000 | 1096 | 1139 | 55550000 | 0.140443 | 0.038068 | 0 |
| chr17 | 55850001 | 55950000 | 1064 | 1091 | 55900000 | 0.15981  | 0.021802 | 0 |
| chr17 | 56350001 | 56450000 | 1111 | 1151 | 56400000 | 0.144934 | 0.033608 | 0 |
| chr17 | 56500001 | 56600000 | 908  | 922  | 56550000 | 0.173889 | 0.01407  | 0 |
| chr17 | 56700001 | 56800000 | 771  | 806  | 56750000 | 0.131914 | 0.047866 | 0 |
| chr17 | 56900001 | 57000000 | 767  | 793  | 56950000 | 0.147869 | 0.030933 | 0 |
| chr17 | 57450001 | 57550000 | 867  | 898  | 57500000 | 0.14528  | 0.033283 | 0 |
| chr17 | 57500001 | 57600000 | 807  | 837  | 57550000 | 0.143304 | 0.035174 | 0 |
| chr17 | 57550001 | 57650000 | 803  | 840  | 57600000 | 0.130974 | 0.049061 | 0 |
| chr17 | 57650001 | 57750000 | 728  | 743  | 57700000 | 0.166539 | 0.017745 | 0 |
| chr17 | 57750001 | 57850000 | 926  | 966  | 57800000 | 0.134952 | 0.044167 | 0 |
| chr17 | 57900001 | 58000000 | 832  | 840  | 57950000 | 0.182157 | 0.010738 | 0 |
| chr17 | 58600001 | 58700000 | 869  | 885  | 58650000 | 0.169642 | 0.016104 | 0 |
| chr17 | 58650001 | 58750000 | 843  | 875  | 58700000 | 0.142213 | 0.036256 | 0 |
| chr17 | 60500001 | 60600000 | 197  | 206  | 60550000 | 0.131514 | 0.048371 | 0 |
| chr17 | 61400001 | 61500000 | 962  | 1006 | 61450000 | 0.131442 | 0.048464 | 0 |
| chr17 | 61500001 | 61600000 | 1119 | 1157 | 61550000 | 0.147784 | 0.031007 | 0 |
| chr17 | 62050001 | 62150000 | 1041 | 1088 | 62100000 | 0.132255 | 0.04744  | 0 |
| chr17 | 62100001 | 62200000 | 1013 | 1042 | 62150000 | 0.155242 | 0.024982 | 0 |
| chr17 | 62150001 | 62250000 | 1008 | 1045 | 62200000 | 0.143956 | 0.034541 | 0 |
| chr17 | 62650001 | 62750000 | 612  | 634  | 62700000 | 0.145012 | 0.033535 | 0 |
| chr17 | 63000001 | 63100000 | 904  | 941  | 63050000 | 0.138091 | 0.040591 | 0 |
| chr17 | 63050001 | 63150000 | 930  | 965  | 63100000 | 0.142665 | 0.035805 | 0 |
| chr17 | 63950001 | 64050000 | 687  | 879  | 6.40E+07 | -0.15959 | 0.022745 | 0 |
| chr17 | 65600001 | 65700000 | 581  | 606  | 65650000 | 0.135183 | 0.043895 | 0 |
| chr17 | 66200001 | 66300000 | 449  | 454  | 66250000 | 0.179986 | 0.011539 | 0 |
| chr17 | 66450001 | 66550000 | 679  | 688  | 66500000 | 0.176966 | 0.012738 | 0 |
| chr17 | 66500001 | 66600000 | 652  | 679  | 66550000 | 0.137423 | 0.041331 | 0 |
| chr17 | 66700001 | 66800000 | 511  | 644  | 66750000 | -0.13777 | 0.041933 | 0 |
| chr17 | 67400001 | 67500000 | 561  | 709  | 67450000 | -0.14182 | 0.037612 | 0 |
| chr17 | 67500001 | 67600000 | 538  | 677  | 67550000 | -0.13559 | 0.044433 | 0 |
| chr17 | 67650001 | 67750000 | 483  | 621  | 67700000 | -0.16661 | 0.018434 | 0 |
| chr17 | 69000001 | 69100000 | 468  | 602  | 69050000 | -0.16729 | 0.018053 | 0 |
| chr17 | 69050001 | 69150000 | 462  | 590  | 69100000 | -0.15686 | 0.02464  | 0 |
| chr17 | 69450001 | 69550000 | 493  | 622  | 69500000 | -0.13936 | 0.04019  | 0 |
| chr17 | 69650001 | 69750000 | 481  | 621  | 69700000 | -0.17259 | 0.015329 | 0 |
| chr17 | 70400001 | 70500000 | 668  | 690  | 70450000 | 0.149215 | 0.029766 | 0 |
| chr17 | 70900001 | 71000000 | 630  | 655  | 70950000 | 0.13982  | 0.038724 | 0 |
| chr17 | 70950001 | 71050000 | 602  | 612  | 7.10E+07 | 0.172195 | 0.014853 | 0 |
| chr17 | 71150001 | 71250000 | 680  | 696  | 71200000 | 0.16241  | 0.02015  | 0 |
| chr17 | 71250001 | 71350000 | 687  | 702  | 71300000 | 0.164802 | 0.018725 | 0 |
| chr17 | 71450001 | 71550000 | 794  | 829  | 71500000 | 0.13373  | 0.045627 | 0 |

|       |          |          |     |     |          |          |          |   |
|-------|----------|----------|-----|-----|----------|----------|----------|---|
| chr17 | 71550001 | 71650000 | 732 | 758 | 71600000 | 0.145609 | 0.032977 | 0 |
| chr17 | 71600001 | 71700000 | 678 | 698 | 71650000 | 0.154021 | 0.025895 | 0 |
| chr17 | 72000001 | 72100000 | 695 | 724 | 72050000 | 0.136986 | 0.041822 | 0 |
| chr17 | 72050001 | 72150000 | 688 | 708 | 72100000 | 0.154622 | 0.025442 | 0 |
| chr17 | 72550001 | 72650000 | 728 | 741 | 72600000 | 0.170428 | 0.01571  | 0 |
| chr17 | 72600001 | 72700000 | 679 | 709 | 72650000 | 0.133589 | 0.045797 | 0 |
| chr17 | 73150001 | 73250000 | 598 | 609 | 73200000 | 0.169666 | 0.016092 | 0 |
| chr17 | 73200001 | 73300000 | 645 | 669 | 73250000 | 0.143256 | 0.035221 | 0 |
| chr17 | 73500001 | 73600000 | 721 | 735 | 73550000 | 0.168218 | 0.01684  | 0 |
| chr17 | 73900001 | 74000000 | 663 | 677 | 73950000 | 0.165816 | 0.018148 | 0 |
| chr17 | 73950001 | 74050000 | 667 | 683 | 7.40E+07 | 0.161764 | 0.02055  | 0 |
| chr17 | 74050001 | 74150000 | 715 | 723 | 74100000 | 0.179911 | 0.011567 | 0 |
| chr17 | 75000001 | 75100000 | 643 | 660 | 75050000 | 0.158316 | 0.022803 | 0 |
| chr17 | 75550001 | 75650000 | 688 | 713 | 75600000 | 0.14447  | 0.034048 | 0 |
| chr17 | 75750001 | 75850000 | 698 | 730 | 75800000 | 0.131294 | 0.048652 | 0 |
| chr17 | 75800001 | 75900000 | 765 | 785 | 75850000 | 0.15873  | 0.022521 | 0 |
| chr17 | 76700001 | 76800000 | 695 | 709 | 76750000 | 0.16719  | 0.01739  | 0 |
| chr17 | 76750001 | 76850000 | 704 | 714 | 76800000 | 0.175614 | 0.013309 | 0 |
| chr17 | 77150001 | 77250000 | 812 | 848 | 77200000 | 0.133378 | 0.046053 | 0 |
| chr17 | 77350001 | 77450000 | 833 | 854 | 77400000 | 0.160043 | 0.021649 | 0 |
| chr17 | 78050001 | 78150000 | 734 | 760 | 78100000 | 0.145744 | 0.032852 | 0 |
| chr17 | 78100001 | 78200000 | 713 | 734 | 78150000 | 0.154085 | 0.025847 | 0 |
| chr17 | 78200001 | 78300000 | 673 | 702 | 78250000 | 0.135099 | 0.043995 | 0 |
| chr17 | 78250001 | 78350000 | 706 | 714 | 78300000 | 0.179707 | 0.011645 | 0 |
| chr17 | 78550001 | 78650000 | 675 | 698 | 78600000 | 0.147624 | 0.03115  | 0 |
| chr17 | 78900001 | 79000000 | 783 | 815 | 78950000 | 0.138175 | 0.040498 | 0 |
| chr17 | 79100001 | 79200000 | 791 | 810 | 79150000 | 0.161719 | 0.020579 | 0 |
| chr17 | 79150001 | 79250000 | 834 | 850 | 79200000 | 0.168548 | 0.016667 | 0 |
| chr17 | 79400001 | 79500000 | 840 | 852 | 79450000 | 0.175499 | 0.013359 | 0 |
| chr17 | 79550001 | 79650000 | 669 | 677 | 79600000 | 0.178813 | 0.011992 | 0 |
| chr17 | 79700001 | 79800000 | 395 | 401 | 79750000 | 0.174213 | 0.013924 | 0 |
| chr17 | 80200001 | 80300000 | 800 | 807 | 80250000 | 0.183394 | 0.010304 | 0 |
| chr17 | 80450001 | 80550000 | 605 | 630 | 80500000 | 0.137546 | 0.041194 | 0 |
| chr17 | 80500001 | 80600000 | 664 | 681 | 80550000 | 0.159491 | 0.022012 | 0 |
| chr17 | 80550001 | 80650000 | 689 | 708 | 80600000 | 0.156718 | 0.023915 | 0 |
| chr17 | 80600001 | 80700000 | 678 | 703 | 80650000 | 0.143724 | 0.034765 | 0 |
| chr18 | 1200001  | 1300000  | 439 | 576 | 1250000  | -0.19588 | 0.007147 | 0 |
| chr18 | 1300001  | 1400000  | 396 | 524 | 1350000  | -0.2081  | 0.004653 | 0 |
| chr18 | 1700001  | 1800000  | 369 | 509 | 1750000  | -0.26808 | 0.000425 | 0 |
| chr18 | 1750001  | 1850000  | 375 | 562 | 1800000  | -0.38772 | 8.97E-07 | 0 |
| chr18 | 1800001  | 1900000  | 433 | 571 | 1850000  | -0.20316 | 0.005549 | 0 |
| chr18 | 3200001  | 3300000  | 678 | 679 | 3250000  | 0.193837 | 0.007212 | 0 |
| chr18 | 3650001  | 3750000  | 523 | 686 | 3700000  | -0.19543 | 0.007258 | 0 |
| chr18 | 5300001  | 5400000  | 416 | 544 | 5350000  | -0.19106 | 0.008421 | 0 |
| chr18 | 5750001  | 5850000  | 443 | 590 | 5800000  | -0.21745 | 0.003307 | 0 |
| chr18 | 5800001  | 5900000  | 449 | 600 | 5850000  | -0.22228 | 0.002758 | 0 |
| chr18 | 5850001  | 5950000  | 467 | 610 | 5900000  | -0.18942 | 0.008896 | 0 |

|       |          |          |     |     |          |          |          |   |
|-------|----------|----------|-----|-----|----------|----------|----------|---|
| chr18 | 6250001  | 6350000  | 427 | 569 | 6300000  | -0.21823 | 0.003212 | 0 |
| chr18 | 7000001  | 7100000  | 431 | 606 | 7050000  | -0.29567 | 0.000121 | 0 |
| chr18 | 7100001  | 7200000  | 458 | 451 | 7150000  | 0.218183 | 0.002956 | 0 |
| chr18 | 8300001  | 8400000  | 579 | 789 | 8350000  | -0.2505  | 0.0009   | 0 |
| chr18 | 8650001  | 8750000  | 648 | 636 | 8700000  | 0.22293  | 0.00246  | 0 |
| chr18 | 8700001  | 8800000  | 681 | 649 | 8750000  | 0.265399 | 0.000412 | 0 |
| chr18 | 9100001  | 9200000  | 621 | 601 | 9150000  | 0.243191 | 0.001083 | 0 |
| chr18 | 9150001  | 9250000  | 553 | 554 | 9200000  | 0.193357 | 0.007334 | 0 |
| chr18 | 9700001  | 9800000  | 772 | 701 | 9750000  | 0.335149 | 1.26E-05 | 0 |
| chr18 | 9750001  | 9850000  | 766 | 735 | 9800000  | 0.255563 | 0.000638 | 0 |
| chr18 | 9800001  | 9900000  | 736 | 741 | 9850000  | 0.186195 | 0.009378 | 0 |
| chr18 | 9850001  | 9950000  | 744 | 738 | 9900000  | 0.207645 | 0.004394 | 0 |
| chr18 | 10500001 | 10600000 | 548 | 551 | 10550000 | 0.188087 | 0.008795 | 0 |
| chr18 | 11600001 | 11700000 | 501 | 436 | 11650000 | 0.396446 | 3.38E-07 | 0 |
| chr18 | 11650001 | 11750000 | 741 | 721 | 11700000 | 0.235437 | 0.001493 | 0 |
| chr18 | 11800001 | 11900000 | 632 | 621 | 11850000 | 0.221294 | 0.002621 | 0 |
| chr18 | 11850001 | 11950000 | 579 | 557 | 11900000 | 0.251849 | 0.00075  | 0 |
| chr18 | 12100001 | 12200000 | 240 | 314 | 12150000 | -0.19177 | 0.008222 | 0 |
| chr18 | 12350001 | 12450000 | 641 | 636 | 12400000 | 0.207261 | 0.004456 | 0 |
| chr18 | 14150001 | 14250000 | 51  | 80  | 14200000 | -0.45354 | 1.44E-08 | 0 |
| chr18 | 14200001 | 14300000 | 64  | 105 | 14250000 | -0.51828 | 1.55E-10 | 0 |
| chr18 | 14250001 | 14350000 | 78  | 134 | 14300000 | -0.58472 | 9.44E-13 | 0 |
| chr18 | 14300001 | 14400000 | 51  | 89  | 14350000 | -0.60735 | 1.51E-13 | 0 |
| chr18 | 14350001 | 14450000 | 37  | 52  | 14400000 | -0.29502 | 0.000124 | 0 |
| chr18 | 14450001 | 14550000 | 26  | 37  | 14500000 | -0.31305 | 5.18E-05 | 0 |
| chr18 | 14550001 | 14650000 | 48  | 47  | 14600000 | 0.226337 | 0.002152 | 0 |
| chr18 | 14600001 | 14700000 | 40  | 54  | 14650000 | -0.237   | 0.001559 | 0 |
| chr18 | 14700001 | 14800000 | 162 | 224 | 14750000 | -0.27154 | 0.000365 | 0 |
| chr18 | 14750001 | 14850000 | 120 | 167 | 14800000 | -0.28085 | 0.00024  | 0 |
| chr18 | 14950001 | 15050000 | 96  | 126 | 1.50E+07 | -0.19635 | 0.007033 | 0 |
| chr18 | 15050001 | 15150000 | 39  | 51  | 15100000 | -0.19106 | 0.008421 | 0 |
| chr18 | 15150001 | 15250000 | 81  | 72  | 15200000 | 0.365888 | 2.19E-06 | 0 |
| chr18 | 15200001 | 15300000 | 40  | 30  | 15250000 | 0.611001 | 2.44E-14 | 0 |
| chr18 | 15300001 | 15400000 | 36  | 74  | 15350000 | -0.84357 | 6.98E-23 | 0 |
| chr18 | 15350001 | 15450000 | 65  | 99  | 15400000 | -0.41103 | 2.20E-07 | 0 |
| chr18 | 19150001 | 19250000 | 563 | 563 | 19200000 | 0.195963 | 0.006694 | 0 |
| chr18 | 19200001 | 19300000 | 589 | 559 | 19250000 | 0.271382 | 0.000314 | 0 |
| chr18 | 19250001 | 19350000 | 609 | 584 | 19300000 | 0.256437 | 0.000614 | 0 |
| chr18 | 20600001 | 20700000 | 599 | 588 | 20650000 | 0.222703 | 0.002482 | 0 |
| chr18 | 20650001 | 20750000 | 637 | 618 | 20700000 | 0.23965  | 0.001255 | 0 |
| chr18 | 21550001 | 21650000 | 667 | 656 | 21600000 | 0.219954 | 0.002761 | 0 |
| chr18 | 21950001 | 22050000 | 627 | 630 | 2.20E+07 | 0.189077 | 0.008502 | 0 |
| chr18 | 22950001 | 23050000 | 453 | 607 | 2.30E+07 | -0.22622 | 0.002374 | 0 |
| chr18 | 23750001 | 23850000 | 407 | 535 | 23800000 | -0.19855 | 0.00652  | 0 |
| chr18 | 24750001 | 24850000 | 445 | 597 | 24800000 | -0.22796 | 0.00222  | 0 |
| chr18 | 25200001 | 25300000 | 430 | 575 | 25250000 | -0.22326 | 0.002658 | 0 |
| chr18 | 25350001 | 25450000 | 383 | 503 | 25400000 | -0.19725 | 0.006819 | 0 |

|       |          |          |     |     |          |          |          |   |
|-------|----------|----------|-----|-----|----------|----------|----------|---|
| chr18 | 25450001 | 25550000 | 394 | 525 | 25500000 | -0.21816 | 0.00322  | 0 |
| chr18 | 25500001 | 25600000 | 409 | 539 | 25550000 | -0.20222 | 0.005735 | 0 |
| chr18 | 25600001 | 25700000 | 404 | 546 | 25650000 | -0.23858 | 0.001463 | 0 |
| chr18 | 25650001 | 25750000 | 434 | 591 | 25700000 | -0.2495  | 0.000938 | 0 |
| chr18 | 25850001 | 25950000 | 375 | 502 | 25900000 | -0.22483 | 0.002504 | 0 |
| chr18 | 26300001 | 26400000 | 373 | 490 | 26350000 | -0.19764 | 0.006727 | 0 |
| chr18 | 26900001 | 27000000 | 349 | 471 | 26950000 | -0.23654 | 0.001587 | 0 |
| chr18 | 27250001 | 27350000 | 361 | 483 | 27300000 | -0.22406 | 0.002578 | 0 |
| chr18 | 27300001 | 27400000 | 355 | 486 | 27350000 | -0.25717 | 0.00068  | 0 |
| chr18 | 27600001 | 27700000 | 358 | 493 | 27650000 | -0.26567 | 0.000472 | 0 |
| chr18 | 27650001 | 27750000 | 402 | 530 | 27700000 | -0.20283 | 0.005613 | 0 |
| chr18 | 27700001 | 27800000 | 387 | 508 | 27750000 | -0.19653 | 0.00699  | 0 |
| chr18 | 28150001 | 28250000 | 399 | 521 | 28200000 | -0.18893 | 0.009044 | 0 |
| chr18 | 28400001 | 28500000 | 373 | 491 | 28450000 | -0.20058 | 0.006074 | 0 |
| chr18 | 28550001 | 28650000 | 400 | 531 | 28600000 | -0.21275 | 0.003932 | 0 |
| chr18 | 28750001 | 28850000 | 409 | 549 | 28800000 | -0.22874 | 0.002154 | 0 |
| chr18 | 28950001 | 29050000 | 446 | 586 | 2.90E+07 | -0.19789 | 0.006669 | 0 |
| chr18 | 29450001 | 29550000 | 463 | 461 | 29500000 | 0.202208 | 0.005358 | 0 |
| chr18 | 30650001 | 30750000 | 366 | 494 | 30700000 | -0.2367  | 0.001577 | 0 |
| chr18 | 31650001 | 31750000 | 366 | 479 | 31700000 | -0.19222 | 0.008098 | 0 |
| chr18 | 31900001 | 32000000 | 423 | 552 | 31950000 | -0.18805 | 0.009314 | 0 |
| chr18 | 32100001 | 32200000 | 435 | 581 | 32150000 | -0.22156 | 0.002835 | 0 |
| chr18 | 34550001 | 34650000 | 368 | 496 | 34600000 | -0.23467 | 0.001709 | 0 |
| chr18 | 35100001 | 35200000 | 547 | 716 | 35150000 | -0.19246 | 0.008033 | 0 |
| chr18 | 35900001 | 36000000 | 395 | 568 | 35950000 | -0.32808 | 2.42E-05 | 0 |
| chr18 | 35950001 | 36050000 | 423 | 553 | 3.60E+07 | -0.19066 | 0.008535 | 0 |
| chr18 | 36200001 | 36300000 | 381 | 511 | 36250000 | -0.22757 | 0.002254 | 0 |
| chr18 | 36250001 | 36350000 | 379 | 506 | 36300000 | -0.22098 | 0.002898 | 0 |
| chr18 | 36300001 | 36400000 | 396 | 524 | 36350000 | -0.2081  | 0.004653 | 0 |
| chr18 | 36500001 | 36600000 | 416 | 548 | 36550000 | -0.20163 | 0.005856 | 0 |
| chr18 | 38000001 | 38100000 | 389 | 528 | 38050000 | -0.2448  | 0.001138 | 0 |
| chr18 | 38050001 | 38150000 | 365 | 523 | 38100000 | -0.32295 | 3.15E-05 | 0 |
| chr18 | 38300001 | 38400000 | 375 | 511 | 38350000 | -0.25047 | 0.000901 | 0 |
| chr18 | 38350001 | 38450000 | 361 | 484 | 38400000 | -0.22705 | 0.0023   | 0 |
| chr18 | 38650001 | 38750000 | 388 | 529 | 38700000 | -0.25125 | 0.000872 | 0 |
| chr18 | 39050001 | 39150000 | 421 | 565 | 39100000 | -0.22847 | 0.002177 | 0 |
| chr18 | 39300001 | 39400000 | 408 | 596 | 39350000 | -0.35078 | 7.27E-06 | 0 |
| chr18 | 40250001 | 40350000 | 389 | 526 | 40300000 | -0.23933 | 0.00142  | 0 |
| chr18 | 40750001 | 40850000 | 405 | 528 | 40800000 | -0.18665 | 0.009755 | 0 |
| chr18 | 40800001 | 40900000 | 366 | 521 | 40850000 | -0.31348 | 5.07E-05 | 0 |
| chr18 | 40850001 | 40950000 | 361 | 502 | 40900000 | -0.27973 | 0.000253 | 0 |
| chr18 | 41050001 | 41150000 | 409 | 547 | 41100000 | -0.22348 | 0.002636 | 0 |
| chr18 | 41100001 | 41200000 | 400 | 553 | 41150000 | -0.27132 | 0.000368 | 0 |
| chr18 | 41150001 | 41250000 | 391 | 530 | 41200000 | -0.24286 | 0.001232 | 0 |
| chr18 | 41250001 | 41350000 | 411 | 414 | 41300000 | 0.185471 | 0.00961  | 0 |
| chr18 | 41600001 | 41700000 | 391 | 558 | 41650000 | -0.31713 | 4.23E-05 | 0 |
| chr18 | 41650001 | 41750000 | 380 | 554 | 41700000 | -0.34792 | 8.49E-06 | 0 |

|       |          |          |     |     |          |          |          |   |
|-------|----------|----------|-----|-----|----------|----------|----------|---|
| chr18 | 41800001 | 41900000 | 354 | 462 | 41850000 | -0.18818 | 0.009273 | 0 |
| chr18 | 42950001 | 43050000 | 492 | 652 | 4.30E+07 | -0.21025 | 0.004306 | 0 |
| chr18 | 43400001 | 43500000 | 696 | 665 | 43450000 | 0.261696 | 0.000487 | 0 |
| chr18 | 43450001 | 43550000 | 648 | 632 | 43500000 | 0.232032 | 0.001714 | 0 |
| chr18 | 43900001 | 44000000 | 746 | 748 | 43950000 | 0.1921   | 0.007661 | 0 |
| chr18 | 45550001 | 45650000 | 745 | 745 | 45600000 | 0.195963 | 0.006694 | 0 |
| chr18 | 45600001 | 45700000 | 768 | 734 | 45650000 | 0.261289 | 0.000496 | 0 |
| chr18 | 46350001 | 46450000 | 813 | 804 | 46400000 | 0.212023 | 0.003734 | 0 |
| chr18 | 46400001 | 46500000 | 801 | 761 | 46450000 | 0.269869 | 0.000337 | 0 |
| chr18 | 46450001 | 46550000 | 787 | 781 | 46500000 | 0.207004 | 0.004499 | 0 |
| chr18 | 46900001 | 47000000 | 554 | 556 | 46950000 | 0.190764 | 0.008023 | 0 |
| chr18 | 46950001 | 47050000 | 509 | 496 | 4.70E+07 | 0.233289 | 0.001629 | 0 |
| chr18 | 47300001 | 47400000 | 652 | 636 | 47350000 | 0.231808 | 0.00173  | 0 |
| chr18 | 48400001 | 48500000 | 579 | 583 | 48450000 | 0.186031 | 0.00943  | 0 |
| chr18 | 49000001 | 49100000 | 438 | 571 | 49050000 | -0.1866  | 0.009773 | 0 |
| chr18 | 49050001 | 49150000 | 431 | 569 | 49100000 | -0.20478 | 0.00524  | 0 |
| chr18 | 49650001 | 49750000 | 401 | 543 | 49700000 | -0.24139 | 0.001307 | 0 |
| chr18 | 50300001 | 50400000 | 232 | 304 | 50350000 | -0.19398 | 0.007627 | 0 |
| chr18 | 50400001 | 50500000 | 194 | 261 | 50450000 | -0.23203 | 0.001896 | 0 |
| chr18 | 50450001 | 50550000 | 198 | 287 | 50500000 | -0.33959 | 1.33E-05 | 0 |
| chr18 | 50700001 | 50800000 | 226 | 226 | 50750000 | 0.195963 | 0.006694 | 0 |
| chr18 | 50850001 | 50950000 | 238 | 223 | 50900000 | 0.289881 | 0.000131 | 0 |
| chr18 | 51000001 | 51100000 | 202 | 266 | 51050000 | -0.20111 | 0.005964 | 0 |
| chr18 | 51050001 | 51150000 | 201 | 316 | 51100000 | -0.45677 | 1.16E-08 | 0 |
| chr18 | 51100001 | 51200000 | 192 | 297 | 51150000 | -0.43339 | 5.38E-08 | 0 |
| chr18 | 51150001 | 51250000 | 200 | 272 | 51200000 | -0.24764 | 0.001013 | 0 |
| chr18 | 51550001 | 51650000 | 245 | 344 | 51600000 | -0.29366 | 0.000133 | 0 |
| chr18 | 51600001 | 51700000 | 262 | 343 | 51650000 | -0.19268 | 0.007973 | 0 |
| chr18 | 51950001 | 52050000 | 240 | 318 | 5.20E+07 | -0.21003 | 0.004341 | 0 |
| chr18 | 52000001 | 52100000 | 146 | 201 | 52050000 | -0.26526 | 0.00048  | 0 |
| chr18 | 52400001 | 52500000 | 317 | 296 | 52450000 | 0.294849 | 0.000103 | 0 |
| chr18 | 52450001 | 52550000 | 293 | 291 | 52500000 | 0.205845 | 0.004694 | 0 |
| chr18 | 52650001 | 52750000 | 239 | 321 | 52700000 | -0.2296  | 0.002084 | 0 |
| chr18 | 52950001 | 53050000 | 244 | 320 | 5.30E+07 | -0.19523 | 0.00731  | 0 |
| chr18 | 53300001 | 53400000 | 214 | 287 | 53350000 | -0.22748 | 0.002262 | 0 |
| chr18 | 53350001 | 53450000 | 192 | 267 | 53400000 | -0.27977 | 0.000252 | 0 |
| chr18 | 53400001 | 53500000 | 198 | 262 | 53450000 | -0.2081  | 0.004653 | 0 |
| chr18 | 53500001 | 53600000 | 198 | 289 | 53550000 | -0.34961 | 7.75E-06 | 0 |
| chr18 | 53550001 | 53650000 | 185 | 262 | 53600000 | -0.30608 | 7.31E-05 | 0 |
| chr18 | 53800001 | 53900000 | 244 | 322 | 53850000 | -0.20422 | 0.005345 | 0 |
| chr18 | 53950001 | 54050000 | 222 | 301 | 5.40E+07 | -0.24324 | 0.001213 | 0 |
| chr18 | 54000001 | 54100000 | 189 | 291 | 54050000 | -0.42667 | 8.26E-08 | 0 |
| chr18 | 54050001 | 54150000 | 206 | 280 | 54100000 | -0.24682 | 0.001048 | 0 |
| chr18 | 54650001 | 54750000 | 244 | 334 | 54700000 | -0.257   | 0.000685 | 0 |
| chr18 | 54900001 | 55000000 | 257 | 335 | 54950000 | -0.18643 | 0.009827 | 0 |
| chr18 | 55900001 | 56000000 | 293 | 389 | 55950000 | -0.21291 | 0.00391  | 0 |
| chr18 | 56300001 | 56400000 | 325 | 318 | 56350000 | 0.227376 | 0.002065 | 0 |

|       |          |          |     |     |          |          |          |   |
|-------|----------|----------|-----|-----|----------|----------|----------|---|
| chr18 | 56500001 | 56600000 | 319 | 304 | 56550000 | 0.265448 | 0.000411 | 0 |
| chr18 | 56600001 | 56700000 | 273 | 358 | 56650000 | -0.1951  | 0.007343 | 0 |
| chr18 | 56950001 | 57050000 | 315 | 308 | 5.70E+07 | 0.228385 | 0.001984 | 0 |
| chr18 | 57200001 | 57300000 | 242 | 326 | 57250000 | -0.2339  | 0.001762 | 0 |
| chr18 | 57450001 | 57550000 | 217 | 297 | 57500000 | -0.2568  | 0.000691 | 0 |
| chr18 | 57750001 | 57850000 | 233 | 321 | 57800000 | -0.26628 | 0.00046  | 0 |
| chr18 | 57800001 | 57900000 | 225 | 294 | 57850000 | -0.18993 | 0.008747 | 0 |
| chr18 | 58500001 | 58600000 | 260 | 253 | 58550000 | 0.235337 | 0.001499 | 0 |
| chr18 | 58650001 | 58750000 | 221 | 295 | 58700000 | -0.22071 | 0.002927 | 0 |
| chr18 | 58700001 | 58800000 | 217 | 305 | 58750000 | -0.29515 | 0.000124 | 0 |
| chr18 | 59200001 | 59300000 | 209 | 274 | 59250000 | -0.19471 | 0.00744  | 0 |
| chr18 | 59900001 | 60000000 | 336 | 321 | 59950000 | 0.261851 | 0.000483 | 0 |
| chr18 | 59950001 | 60050000 | 352 | 336 | 6.00E+07 | 0.263077 | 0.000458 | 0 |
| chr18 | 60150001 | 60250000 | 307 | 305 | 60200000 | 0.205392 | 0.004772 | 0 |
| chr18 | 60200001 | 60300000 | 320 | 317 | 60250000 | 0.209552 | 0.004094 | 0 |
| chr18 | 61950001 | 62050000 | 195 | 260 | 6.20E+07 | -0.21907 | 0.003112 | 0 |
| chr18 | 62000001 | 62100000 | 183 | 242 | 62050000 | -0.2072  | 0.004806 | 0 |
| chr18 | 62250001 | 62350000 | 194 | 254 | 62300000 | -0.19281 | 0.007938 | 0 |
| chr18 | 62400001 | 62500000 | 202 | 265 | 62450000 | -0.19567 | 0.007199 | 0 |
| chr18 | 62450001 | 62550000 | 195 | 261 | 62500000 | -0.22461 | 0.002525 | 0 |
| chr18 | 62750001 | 62850000 | 190 | 252 | 62800000 | -0.21146 | 0.004121 | 0 |
| chr18 | 62800001 | 62900000 | 205 | 280 | 62850000 | -0.25384 | 0.000783 | 0 |
| chr18 | 63050001 | 63150000 | 192 | 263 | 63100000 | -0.25799 | 0.000657 | 0 |
| chr18 | 63200001 | 63300000 | 186 | 243 | 63250000 | -0.18969 | 0.008817 | 0 |
| chr18 | 63300001 | 63400000 | 182 | 240 | 63350000 | -0.20313 | 0.005554 | 0 |
| chr18 | 63350001 | 63450000 | 182 | 261 | 63400000 | -0.32415 | 2.96E-05 | 0 |
| chr18 | 63400001 | 63500000 | 181 | 242 | 63450000 | -0.22305 | 0.002679 | 0 |
| chr18 | 64100001 | 64200000 | 215 | 297 | 64150000 | -0.27016 | 0.000388 | 0 |
| chr18 | 64150001 | 64250000 | 212 | 299 | 64200000 | -0.30012 | 9.75E-05 | 0 |
| chr18 | 64200001 | 64300000 | 205 | 270 | 64250000 | -0.20137 | 0.005909 | 0 |
| chr18 | 64450001 | 64550000 | 197 | 262 | 64500000 | -0.21541 | 0.003566 | 0 |
| chr18 | 64600001 | 64700000 | 198 | 289 | 64650000 | -0.34961 | 7.75E-06 | 0 |
| chr18 | 64650001 | 64750000 | 217 | 300 | 64700000 | -0.2713  | 0.000369 | 0 |
| chr18 | 64800001 | 64900000 | 216 | 291 | 64850000 | -0.23402 | 0.001753 | 0 |
| chr18 | 65250001 | 65350000 | 247 | 323 | 65300000 | -0.19106 | 0.008421 | 0 |
| chr18 | 65850001 | 65950000 | 198 | 293 | 65900000 | -0.36944 | 2.58E-06 | 0 |
| chr18 | 65900001 | 66000000 | 193 | 291 | 65950000 | -0.39646 | 5.34E-07 | 0 |
| chr18 | 66050001 | 66150000 | 257 | 248 | 66100000 | 0.247391 | 0.000907 | 0 |
| chr18 | 66150001 | 66250000 | 219 | 298 | 66200000 | -0.24842 | 0.000981 | 0 |
| chr18 | 66800001 | 66900000 | 222 | 301 | 66850000 | -0.24324 | 0.001213 | 0 |
| chr18 | 67000001 | 67100000 | 277 | 275 | 67050000 | 0.206417 | 0.004597 | 0 |
| chr18 | 67100001 | 67200000 | 218 | 299 | 67150000 | -0.25985 | 0.000607 | 0 |
| chr18 | 67150001 | 67250000 | 215 | 297 | 67200000 | -0.27016 | 0.000388 | 0 |
| chr18 | 68300001 | 68400000 | 252 | 248 | 68350000 | 0.219047 | 0.002859 | 0 |
| chr18 | 68400001 | 68500000 | 198 | 262 | 68450000 | -0.2081  | 0.004653 | 0 |
| chr18 | 68800001 | 68900000 | 197 | 263 | 68850000 | -0.2209  | 0.002906 | 0 |
| chr18 | 69150001 | 69250000 | 199 | 260 | 69200000 | -0.18978 | 0.008791 | 0 |



|       |          |          |     |     |          |          |          |   |
|-------|----------|----------|-----|-----|----------|----------|----------|---|
| chr18 | 69500001 | 69600000 | 182 | 251 | 69550000 | -0.26779 | 0.00043  | 0 |
| chr18 | 69650001 | 69750000 | 191 | 254 | 69700000 | -0.21529 | 0.003581 | 0 |
| chr18 | 70050001 | 70150000 | 217 | 212 | 70100000 | 0.229594 | 0.00189  | 0 |
| chr18 | 70100001 | 70200000 | 240 | 239 | 70150000 | 0.201987 | 0.005401 | 0 |
| chr18 | 70250001 | 70350000 | 174 | 247 | 70300000 | -0.30946 | 6.19E-05 | 0 |
| chr18 | 70300001 | 70400000 | 174 | 249 | 70350000 | -0.3211  | 3.46E-05 | 0 |
| chr18 | 70350001 | 70450000 | 179 | 242 | 70400000 | -0.23908 | 0.001434 | 0 |
| chr18 | 70450001 | 70550000 | 217 | 296 | 70500000 | -0.25194 | 0.000848 | 0 |
| chr18 | 70500001 | 70600000 | 185 | 286 | 70550000 | -0.43253 | 5.69E-08 | 0 |
| chr18 | 70550001 | 70650000 | 163 | 249 | 70600000 | -0.41531 | 1.69E-07 | 0 |
| chr18 | 70600001 | 70700000 | 175 | 231 | 70650000 | -0.20457 | 0.005278 | 0 |
| chr18 | 70650001 | 70750000 | 184 | 252 | 70700000 | -0.25775 | 0.000663 | 0 |
| chr18 | 70700001 | 70800000 | 186 | 266 | 70750000 | -0.32016 | 3.63E-05 | 0 |
| chr18 | 71100001 | 71200000 | 201 | 202 | 71150000 | 0.188803 | 0.008582 | 0 |
| chr18 | 71350001 | 71450000 | 235 | 321 | 71400000 | -0.25395 | 0.000779 | 0 |
| chr18 | 71550001 | 71650000 | 204 | 278 | 71600000 | -0.25055 | 0.000898 | 0 |
| chr18 | 71600001 | 71700000 | 182 | 256 | 71650000 | -0.29624 | 0.000117 | 0 |
| chr18 | 72000001 | 72100000 | 270 | 358 | 72050000 | -0.21104 | 0.004185 | 0 |
| chr18 | 72100001 | 72200000 | 328 | 318 | 72150000 | 0.240632 | 0.001205 | 0 |
| chr18 | 73250001 | 73350000 | 212 | 297 | 73300000 | -0.29044 | 0.000154 | 0 |
| chr18 | 73300001 | 73400000 | 207 | 278 | 73350000 | -0.22949 | 0.002093 | 0 |
| chr18 | 73400001 | 73500000 | 241 | 319 | 73450000 | -0.20856 | 0.004577 | 0 |
| chr18 | 73450001 | 73550000 | 260 | 343 | 73500000 | -0.20373 | 0.005437 | 0 |
| chr18 | 74150001 | 74250000 | 321 | 314 | 74200000 | 0.227772 | 0.002033 | 0 |
| chr18 | 74500001 | 74600000 | 303 | 272 | 74550000 | 0.351674 | 5.00E-06 | 0 |
| chr18 | 74550001 | 74650000 | 317 | 292 | 74600000 | 0.314478 | 3.81E-05 | 0 |
| chr18 | 74650001 | 74750000 | 280 | 373 | 74700000 | -0.21779 | 0.003265 | 0 |
| chr18 | 74700001 | 74800000 | 286 | 373 | 74750000 | -0.1872  | 0.009581 | 0 |
| chr18 | 75150001 | 75250000 | 231 | 306 | 75200000 | -0.20968 | 0.004397 | 0 |
| chr18 | 75550001 | 75650000 | 300 | 299 | 75600000 | 0.20078  | 0.00564  | 0 |
| chr18 | 75600001 | 75700000 | 285 | 280 | 75650000 | 0.221498 | 0.002601 | 0 |
| chr18 | 75800001 | 75900000 | 286 | 286 | 75850000 | 0.195963 | 0.006694 | 0 |
| chr18 | 76300001 | 76400000 | 323 | 311 | 76350000 | 0.250583 | 0.000792 | 0 |
| chr18 | 76350001 | 76450000 | 317 | 296 | 76400000 | 0.294849 | 0.000103 | 0 |
| chr18 | 77500001 | 77600000 | 359 | 330 | 77550000 | 0.317481 | 3.25E-05 | 0 |
| chr18 | 77550001 | 77650000 | 331 | 325 | 77600000 | 0.222355 | 0.002516 | 0 |
| chr18 | 78000001 | 78100000 | 63  | 55  | 78050000 | 0.391883 | 4.50E-07 | 0 |
| chr18 | 150001   | 250000   | 538 | 561 | 2.00E+05 | 0.135568 | 0.043445 | 0 |
| chr18 | 850001   | 950000   | 574 | 581 | 9.00E+05 | 0.178476 | 0.012126 | 0 |
| chr18 | 1100001  | 1200000  | 428 | 539 | 1150000  | -0.13671 | 0.043133 | 0 |
| chr18 | 1150001  | 1250000  | 455 | 571 | 1200000  | -0.13166 | 0.049218 | 0 |
| chr18 | 1250001  | 1350000  | 418 | 543 | 1300000  | -0.18149 | 0.011553 | 0 |
| chr18 | 1450001  | 1550000  | 432 | 560 | 1500000  | -0.17843 | 0.012746 | 0 |
| chr18 | 1600001  | 1700000  | 417 | 531 | 1650000  | -0.1527  | 0.027779 | 0 |
| chr18 | 1650001  | 1750000  | 433 | 555 | 1700000  | -0.16216 | 0.021077 | 0 |
| chr18 | 2400001  | 2500000  | 535 | 697 | 2450000  | -0.18566 | 0.010081 | 0 |
| chr18 | 2500001  | 2600000  | 611 | 623 | 2550000  | 0.167903 | 0.017007 | 0 |

|       |          |          |     |     |          |          |          |   |
|-------|----------|----------|-----|-----|----------|----------|----------|---|
| chr18 | 3000001  | 3100000  | 562 | 578 | 3050000  | 0.155464 | 0.02482  | 0 |
| chr18 | 3500001  | 3600000  | 511 | 650 | 3550000  | -0.15115 | 0.029031 | 0 |
| chr18 | 3850001  | 3950000  | 576 | 739 | 3900000  | -0.16354 | 0.020222 | 0 |
| chr18 | 4250001  | 4350000  | 532 | 550 | 4300000  | 0.147958 | 0.030855 | 0 |
| chr18 | 4300001  | 4400000  | 524 | 547 | 4350000  | 0.133989 | 0.045314 | 0 |
| chr18 | 5150001  | 5250000  | 484 | 614 | 5200000  | -0.14727 | 0.032381 | 0 |
| chr18 | 5350001  | 5450000  | 479 | 606 | 5400000  | -0.14333 | 0.036099 | 0 |
| chr18 | 5700001  | 5800000  | 440 | 567 | 5750000  | -0.16988 | 0.016674 | 0 |
| chr18 | 5900001  | 6000000  | 465 | 597 | 5950000  | -0.16454 | 0.019626 | 0 |
| chr18 | 5950001  | 6050000  | 439 | 561 | 6.00E+06 | -0.15782 | 0.02396  | 0 |
| chr18 | 6300001  | 6400000  | 412 | 529 | 6350000  | -0.16466 | 0.019553 | 0 |
| chr18 | 8350001  | 8450000  | 610 | 775 | 8400000  | -0.14942 | 0.030485 | 0 |
| chr18 | 8750001  | 8850000  | 676 | 700 | 8800000  | 0.145631 | 0.032956 | 0 |
| chr18 | 9050001  | 9150000  | 646 | 671 | 9100000  | 0.141184 | 0.0373   | 0 |
| chr18 | 9250001  | 9350000  | 555 | 560 | 9300000  | 0.183024 | 0.010433 | 0 |
| chr18 | 9650001  | 9750000  | 691 | 708 | 9700000  | 0.160899 | 0.021097 | 0 |
| chr18 | 9900001  | 10000000 | 692 | 716 | 9950000  | 0.146775 | 0.031908 | 0 |
| chr18 | 10400001 | 10500000 | 679 | 703 | 10450000 | 0.14585  | 0.032753 | 0 |
| chr18 | 10450001 | 10550000 | 676 | 687 | 10500000 | 0.172676 | 0.014627 | 0 |
| chr18 | 10550001 | 10650000 | 270 | 275 | 10600000 | 0.169491 | 0.016181 | 0 |
| chr18 | 11900001 | 12000000 | 560 | 568 | 11950000 | 0.175499 | 0.013359 | 0 |
| chr18 | 12450001 | 12550000 | 536 | 694 | 12500000 | -0.17674 | 0.013453 | 0 |
| chr18 | 12550001 | 12650000 | 591 | 600 | 12600000 | 0.174159 | 0.013948 | 0 |
| chr18 | 12900001 | 13000000 | 618 | 646 | 12950000 | 0.132036 | 0.047714 | 0 |
| chr18 | 12950001 | 13050000 | 646 | 658 | 1.30E+07 | 0.16941  | 0.016222 | 0 |
| chr18 | 13150001 | 13250000 | 687 | 711 | 13200000 | 0.146424 | 0.032227 | 0 |
| chr18 | 14000001 | 14100000 | 428 | 541 | 14050000 | -0.14205 | 0.037375 | 0 |
| chr18 | 14650001 | 14750000 | 92  | 117 | 14700000 | -0.15084 | 0.02929  | 0 |
| chr18 | 18900001 | 19000000 | 553 | 568 | 18950000 | 0.157352 | 0.023468 | 0 |
| chr18 | 19100001 | 19200000 | 558 | 584 | 19150000 | 0.13026  | 0.049983 | 0 |
| chr18 | 19350001 | 19450000 | 582 | 605 | 19400000 | 0.140047 | 0.038484 | 0 |
| chr18 | 19550001 | 19650000 | 481 | 612 | 19600000 | -0.15153 | 0.028721 | 0 |
| chr18 | 19600001 | 19700000 | 496 | 627 | 19650000 | -0.14216 | 0.037266 | 0 |
| chr18 | 19650001 | 19750000 | 547 | 568 | 19700000 | 0.141613 | 0.036862 | 0 |
| chr18 | 19700001 | 19800000 | 594 | 617 | 19750000 | 0.141155 | 0.03733  | 0 |
| chr18 | 19800001 | 19900000 | 658 | 678 | 19850000 | 0.152765 | 0.026864 | 0 |
| chr18 | 20000001 | 20100000 | 605 | 760 | 20050000 | -0.1331  | 0.047417 | 0 |
| chr18 | 20050001 | 20150000 | 585 | 739 | 20100000 | -0.14117 | 0.038277 | 0 |
| chr18 | 20700001 | 20800000 | 709 | 722 | 20750000 | 0.16975  | 0.016049 | 0 |
| chr18 | 21050001 | 21150000 | 634 | 663 | 21100000 | 0.131437 | 0.048469 | 0 |
| chr18 | 21350001 | 21450000 | 681 | 698 | 21400000 | 0.160391 | 0.021424 | 0 |
| chr18 | 21600001 | 21700000 | 630 | 649 | 21650000 | 0.153096 | 0.026606 | 0 |
| chr18 | 22000001 | 22100000 | 633 | 639 | 22050000 | 0.182353 | 0.010669 | 0 |
| chr18 | 22700001 | 22800000 | 487 | 611 | 22750000 | -0.13129 | 0.049695 | 0 |
| chr18 | 22800001 | 22900000 | 493 | 633 | 22850000 | -0.16465 | 0.019556 | 0 |
| chr18 | 23000001 | 23100000 | 456 | 573 | 23050000 | -0.13354 | 0.046881 | 0 |
| chr18 | 23450001 | 23550000 | 497 | 625 | 23500000 | -0.13465 | 0.045542 | 0 |

|       |          |          |     |     |          |          |          |   |
|-------|----------|----------|-----|-----|----------|----------|----------|---|
| chr18 | 23550001 | 23650000 | 534 | 556 | 23600000 | 0.137718 | 0.041003 | 0 |
| chr18 | 24450001 | 24550000 | 437 | 549 | 24500000 | -0.13321 | 0.047283 | 0 |
| chr18 | 24500001 | 24600000 | 436 | 562 | 24550000 | -0.17028 | 0.016471 | 0 |
| chr18 | 24950001 | 25050000 | 443 | 566 | 2.50E+07 | -0.15753 | 0.024161 | 0 |
| chr18 | 25150001 | 25250000 | 432 | 549 | 25200000 | -0.14981 | 0.030154 | 0 |
| chr18 | 25750001 | 25850000 | 341 | 431 | 25800000 | -0.14195 | 0.037478 | 0 |
| chr18 | 25800001 | 25900000 | 337 | 433 | 25850000 | -0.16566 | 0.018974 | 0 |
| chr18 | 26350001 | 26450000 | 400 | 504 | 26400000 | -0.13746 | 0.042285 | 0 |
| chr18 | 26500001 | 26600000 | 405 | 520 | 26550000 | -0.16463 | 0.019573 | 0 |
| chr18 | 26750001 | 26850000 | 369 | 464 | 26800000 | -0.13454 | 0.045669 | 0 |
| chr18 | 27200001 | 27300000 | 399 | 506 | 27250000 | -0.14679 | 0.032819 | 0 |
| chr18 | 27350001 | 27450000 | 390 | 507 | 27400000 | -0.18255 | 0.011161 | 0 |
| chr18 | 27500001 | 27600000 | 389 | 499 | 27550000 | -0.16331 | 0.020365 | 0 |
| chr18 | 27750001 | 27850000 | 374 | 486 | 27800000 | -0.18196 | 0.011378 | 0 |
| chr18 | 27950001 | 28050000 | 395 | 502 | 2.80E+07 | -0.14987 | 0.030103 | 0 |
| chr18 | 28000001 | 28100000 | 386 | 486 | 28050000 | -0.13639 | 0.043498 | 0 |
| chr18 | 28200001 | 28300000 | 412 | 536 | 28250000 | -0.18363 | 0.010776 | 0 |
| chr18 | 28600001 | 28700000 | 445 | 561 | 28650000 | -0.13823 | 0.041425 | 0 |
| chr18 | 28700001 | 28800000 | 422 | 541 | 28750000 | -0.16242 | 0.020911 | 0 |
| chr18 | 29350001 | 29450000 | 509 | 516 | 29400000 | 0.176258 | 0.013034 | 0 |
| chr18 | 29400001 | 29500000 | 522 | 533 | 29450000 | 0.165877 | 0.018114 | 0 |
| chr18 | 29650001 | 29750000 | 475 | 493 | 29700000 | 0.142303 | 0.036166 | 0 |
| chr18 | 29900001 | 30000000 | 466 | 590 | 29950000 | -0.14442 | 0.035034 | 0 |
| chr18 | 30400001 | 30500000 | 435 | 555 | 30450000 | -0.15551 | 0.025624 | 0 |
| chr18 | 30450001 | 30550000 | 449 | 579 | 30500000 | -0.17088 | 0.016165 | 0 |
| chr18 | 30700001 | 30800000 | 379 | 490 | 30750000 | -0.17462 | 0.014385 | 0 |
| chr18 | 31100001 | 31200000 | 417 | 534 | 31150000 | -0.16083 | 0.021926 | 0 |
| chr18 | 31350001 | 31450000 | 368 | 469 | 31400000 | -0.15392 | 0.026827 | 0 |
| chr18 | 31600001 | 31700000 | 434 | 553 | 31650000 | -0.15362 | 0.027057 | 0 |
| chr18 | 31750001 | 31850000 | 387 | 488 | 31800000 | -0.13858 | 0.041037 | 0 |
| chr18 | 32050001 | 32150000 | 440 | 557 | 32100000 | -0.14421 | 0.035238 | 0 |
| chr18 | 32150001 | 32250000 | 438 | 567 | 32200000 | -0.17645 | 0.013575 | 0 |
| chr18 | 33100001 | 33200000 | 668 | 676 | 33150000 | 0.178788 | 0.012002 | 0 |
| chr18 | 33150001 | 33250000 | 680 | 687 | 33200000 | 0.181188 | 0.01109  | 0 |
| chr18 | 33700001 | 33800000 | 661 | 669 | 33750000 | 0.178607 | 0.012074 | 0 |
| chr18 | 33750001 | 33850000 | 603 | 615 | 33800000 | 0.167535 | 0.017204 | 0 |
| chr18 | 35150001 | 35250000 | 500 | 634 | 35200000 | -0.14659 | 0.032996 | 0 |
| chr18 | 35600001 | 35700000 | 430 | 547 | 35650000 | -0.15124 | 0.028959 | 0 |
| chr18 | 35650001 | 35750000 | 425 | 552 | 35700000 | -0.18124 | 0.011644 | 0 |
| chr18 | 36150001 | 36250000 | 420 | 537 | 36200000 | -0.15857 | 0.023438 | 0 |
| chr18 | 36450001 | 36550000 | 433 | 551 | 36500000 | -0.15172 | 0.028566 | 0 |
| chr18 | 36950001 | 37050000 | 395 | 501 | 3.70E+07 | -0.14699 | 0.032628 | 0 |
| chr18 | 37050001 | 37150000 | 434 | 548 | 37100000 | -0.14052 | 0.038963 | 0 |
| chr18 | 37100001 | 37200000 | 416 | 525 | 37150000 | -0.13977 | 0.039754 | 0 |
| chr18 | 37200001 | 37300000 | 458 | 581 | 37250000 | -0.14723 | 0.032418 | 0 |
| chr18 | 37350001 | 37450000 | 453 | 572 | 37400000 | -0.14054 | 0.038938 | 0 |
| chr18 | 38100001 | 38200000 | 391 | 504 | 38150000 | -0.17029 | 0.016464 | 0 |

|       |          |          |     |     |          |          |          |   |
|-------|----------|----------|-----|-----|----------|----------|----------|---|
| chr18 | 38150001 | 38250000 | 402 | 508 | 38200000 | -0.14167 | 0.037767 | 0 |
| chr18 | 38600001 | 38700000 | 381 | 491 | 38650000 | -0.16997 | 0.016629 | 0 |
| chr18 | 39100001 | 39200000 | 453 | 569 | 39150000 | -0.13295 | 0.047598 | 0 |
| chr18 | 39250001 | 39350000 | 472 | 607 | 39300000 | -0.16695 | 0.018244 | 0 |
| chr18 | 39700001 | 39800000 | 430 | 556 | 39750000 | -0.17479 | 0.014311 | 0 |
| chr18 | 39750001 | 39850000 | 429 | 543 | 39800000 | -0.14401 | 0.035431 | 0 |
| chr18 | 39850001 | 39950000 | 448 | 566 | 39900000 | -0.14134 | 0.038106 | 0 |
| chr18 | 39900001 | 40000000 | 434 | 563 | 39950000 | -0.17948 | 0.012326 | 0 |
| chr18 | 40100001 | 40200000 | 425 | 549 | 40150000 | -0.17338 | 0.014956 | 0 |
| chr18 | 40450001 | 40550000 | 439 | 563 | 40500000 | -0.16295 | 0.020584 | 0 |
| chr18 | 41000001 | 41100000 | 402 | 513 | 41050000 | -0.1558  | 0.025409 | 0 |
| chr18 | 42450001 | 42550000 | 478 | 613 | 42500000 | -0.16291 | 0.020607 | 0 |
| chr18 | 43000001 | 43100000 | 491 | 638 | 43050000 | -0.18187 | 0.01141  | 0 |
| chr18 | 43200001 | 43300000 | 643 | 668 | 43250000 | 0.140934 | 0.037559 | 0 |
| chr18 | 43350001 | 43450000 | 593 | 601 | 43400000 | 0.17663  | 0.012878 | 0 |
| chr18 | 43500001 | 43600000 | 621 | 647 | 43550000 | 0.136791 | 0.042043 | 0 |
| chr18 | 43750001 | 43850000 | 592 | 614 | 43800000 | 0.143322 | 0.035157 | 0 |
| chr18 | 43800001 | 43900000 | 707 | 725 | 43850000 | 0.159692 | 0.02188  | 0 |
| chr18 | 43850001 | 43950000 | 760 | 770 | 43900000 | 0.177104 | 0.012681 | 0 |
| chr18 | 44200001 | 44300000 | 708 | 733 | 44250000 | 0.145899 | 0.032708 | 0 |
| chr18 | 45650001 | 45750000 | 758 | 780 | 45700000 | 0.154687 | 0.025394 | 0 |
| chr18 | 46000001 | 46100000 | 676 | 702 | 46050000 | 0.141515 | 0.036962 | 0 |
| chr18 | 46300001 | 46400000 | 797 | 821 | 46350000 | 0.153161 | 0.026556 | 0 |
| chr18 | 47000001 | 47100000 | 539 | 554 | 47050000 | 0.156362 | 0.024168 | 0 |
| chr18 | 47150001 | 47250000 | 517 | 663 | 47200000 | -0.16288 | 0.020626 | 0 |
| chr18 | 47200001 | 47300000 | 502 | 630 | 47250000 | -0.1317  | 0.049167 | 0 |
| chr18 | 47350001 | 47450000 | 724 | 730 | 47400000 | 0.184056 | 0.010079 | 0 |
| chr18 | 47900001 | 48000000 | 561 | 576 | 47950000 | 0.157895 | 0.023091 | 0 |
| chr18 | 48350001 | 48450000 | 592 | 602 | 48400000 | 0.171797 | 0.015042 | 0 |
| chr18 | 48850001 | 48950000 | 456 | 594 | 48900000 | -0.18547 | 0.010145 | 0 |
| chr18 | 49300001 | 49400000 | 433 | 552 | 49350000 | -0.15434 | 0.026505 | 0 |
| chr18 | 49350001 | 49450000 | 438 | 551 | 49400000 | -0.13516 | 0.044936 | 0 |
| chr18 | 49600001 | 49700000 | 430 | 541 | 49650000 | -0.13533 | 0.044735 | 0 |
| chr18 | 49700001 | 49800000 | 457 | 580 | 49750000 | -0.1479  | 0.031819 | 0 |
| chr18 | 49900001 | 50000000 | 483 | 608 | 49950000 | -0.13609 | 0.043853 | 0 |
| chr18 | 50350001 | 50450000 | 193 | 250 | 50400000 | -0.17736 | 0.013188 | 0 |
| chr18 | 50500001 | 50600000 | 204 | 256 | 50550000 | -0.13161 | 0.049281 | 0 |
| chr18 | 50800001 | 50900000 | 236 | 240 | 50850000 | 0.171715 | 0.015081 | 0 |
| chr18 | 50950001 | 51050000 | 199 | 257 | 5.10E+07 | -0.17304 | 0.015118 | 0 |
| chr18 | 51200001 | 51300000 | 226 | 284 | 51250000 | -0.13361 | 0.046799 | 0 |
| chr18 | 51450001 | 51550000 | 244 | 307 | 51500000 | -0.13539 | 0.044658 | 0 |
| chr18 | 51500001 | 51600000 | 236 | 303 | 51550000 | -0.16457 | 0.019608 | 0 |
| chr18 | 52050001 | 52150000 | 25  | 32  | 52100000 | -0.16018 | 0.022351 | 0 |
| chr18 | 52350001 | 52450000 | 308 | 318 | 52400000 | 0.149867 | 0.029215 | 0 |
| chr18 | 52900001 | 53000000 | 256 | 323 | 52950000 | -0.13943 | 0.040122 | 0 |
| chr18 | 53200001 | 53300000 | 220 | 282 | 53250000 | -0.16223 | 0.021033 | 0 |
| chr18 | 53250001 | 53350000 | 233 | 302 | 53300000 | -0.17826 | 0.012818 | 0 |

|       |          |          |     |     |          |          |          |   |
|-------|----------|----------|-----|-----|----------|----------|----------|---|
| chr18 | 53450001 | 53550000 | 215 | 276 | 53500000 | -0.16437 | 0.019726 | 0 |
| chr18 | 54150001 | 54250000 | 219 | 277 | 54200000 | -0.14299 | 0.036433 | 0 |
| chr18 | 54450001 | 54550000 | 235 | 306 | 54500000 | -0.18491 | 0.010333 | 0 |
| chr18 | 54600001 | 54700000 | 256 | 324 | 54650000 | -0.14389 | 0.035552 | 0 |
| chr18 | 55200001 | 55300000 | 266 | 277 | 55250000 | 0.137503 | 0.041242 | 0 |
| chr18 | 55850001 | 55950000 | 282 | 367 | 55900000 | -0.18412 | 0.010602 | 0 |
| chr18 | 56350001 | 56450000 | 298 | 307 | 56400000 | 0.153037 | 0.026652 | 0 |
| chr18 | 56400001 | 56500000 | 276 | 288 | 56450000 | 0.134562 | 0.044628 | 0 |
| chr18 | 56450001 | 56550000 | 286 | 291 | 56500000 | 0.170959 | 0.015448 | 0 |
| chr18 | 56750001 | 56850000 | 286 | 364 | 56800000 | -0.15196 | 0.028373 | 0 |
| chr18 | 56900001 | 57000000 | 271 | 279 | 56950000 | 0.153991 | 0.025919 | 0 |
| chr18 | 57000001 | 57100000 | 275 | 279 | 57050000 | 0.17513  | 0.013519 | 0 |
| chr18 | 57150001 | 57250000 | 242 | 314 | 57200000 | -0.17979 | 0.012201 | 0 |
| chr18 | 57250001 | 57350000 | 234 | 303 | 57300000 | -0.17685 | 0.013407 | 0 |
| chr18 | 57350001 | 57450000 | 272 | 279 | 57400000 | 0.159305 | 0.022136 | 0 |
| chr18 | 57400001 | 57500000 | 225 | 292 | 57450000 | -0.18008 | 0.012089 | 0 |
| chr18 | 57500001 | 57600000 | 285 | 290 | 57550000 | 0.170872 | 0.01549  | 0 |
| chr18 | 57550001 | 57650000 | 303 | 312 | 57600000 | 0.153735 | 0.026114 | 0 |
| chr18 | 58350001 | 58450000 | 244 | 307 | 58400000 | -0.13539 | 0.044658 | 0 |
| chr18 | 58400001 | 58500000 | 218 | 278 | 58450000 | -0.15479 | 0.02616  | 0 |
| chr18 | 58450001 | 58550000 | 225 | 230 | 58500000 | 0.164254 | 0.019044 | 0 |
| chr18 | 58550001 | 58650000 | 254 | 261 | 58600000 | 0.156742 | 0.023898 | 0 |
| chr18 | 58750001 | 58850000 | 227 | 294 | 58800000 | -0.17716 | 0.013274 | 0 |
| chr18 | 58900001 | 59000000 | 229 | 297 | 58950000 | -0.17915 | 0.012456 | 0 |
| chr18 | 59050001 | 59150000 | 230 | 290 | 59100000 | -0.13846 | 0.041179 | 0 |
| chr18 | 59250001 | 59350000 | 238 | 307 | 59300000 | -0.17131 | 0.015951 | 0 |
| chr18 | 59700001 | 59800000 | 236 | 297 | 59750000 | -0.13571 | 0.044285 | 0 |
| chr18 | 60750001 | 60850000 | 284 | 365 | 60800000 | -0.16604 | 0.018753 | 0 |
| chr18 | 61150001 | 61250000 | 262 | 332 | 61200000 | -0.14565 | 0.033865 | 0 |
| chr18 | 61200001 | 61300000 | 252 | 317 | 61250000 | -0.1351  | 0.045009 | 0 |
| chr18 | 61250001 | 61350000 | 192 | 248 | 61300000 | -0.17327 | 0.015008 | 0 |
| chr18 | 61400001 | 61500000 | 204 | 261 | 61450000 | -0.15952 | 0.022793 | 0 |
| chr18 | 61450001 | 61550000 | 207 | 268 | 61500000 | -0.17664 | 0.013496 | 0 |
| chr18 | 62150001 | 62250000 | 185 | 233 | 62200000 | -0.13684 | 0.042985 | 0 |
| chr18 | 62500001 | 62600000 | 202 | 257 | 62550000 | -0.15145 | 0.028788 | 0 |
| chr18 | 62550001 | 62650000 | 201 | 256 | 62600000 | -0.15299 | 0.027555 | 0 |
| chr18 | 62600001 | 62700000 | 205 | 265 | 62650000 | -0.17441 | 0.014483 | 0 |
| chr18 | 62700001 | 62800000 | 206 | 260 | 62750000 | -0.1399  | 0.039612 | 0 |
| chr18 | 62850001 | 62950000 | 225 | 287 | 62900000 | -0.15516 | 0.025883 | 0 |
| chr18 | 63100001 | 63200000 | 191 | 248 | 63150000 | -0.1808  | 0.01181  | 0 |
| chr18 | 63250001 | 63350000 | 179 | 227 | 63300000 | -0.14677 | 0.032833 | 0 |
| chr18 | 64350001 | 64450000 | 193 | 245 | 64400000 | -0.14822 | 0.031534 | 0 |
| chr18 | 64500001 | 64600000 | 200 | 257 | 64550000 | -0.16581 | 0.018888 | 0 |
| chr18 | 64550001 | 64650000 | 203 | 255 | 64600000 | -0.13305 | 0.047474 | 0 |
| chr18 | 64850001 | 64950000 | 225 | 286 | 64900000 | -0.15013 | 0.029887 | 0 |
| chr18 | 64950001 | 65050000 | 255 | 264 | 6.50E+07 | 0.145922 | 0.032687 | 0 |
| chr18 | 65050001 | 65150000 | 236 | 305 | 65100000 | -0.17406 | 0.014641 | 0 |

|       |          |          |     |     |          |          |          |   |
|-------|----------|----------|-----|-----|----------|----------|----------|---|
| chr18 | 65200001 | 65300000 | 254 | 325 | 65250000 | -0.15965 | 0.022706 | 0 |
| chr18 | 65650001 | 65750000 | 225 | 292 | 65700000 | -0.18008 | 0.012089 | 0 |
| chr18 | 65700001 | 65800000 | 235 | 297 | 65750000 | -0.14184 | 0.037594 | 0 |
| chr18 | 66200001 | 66300000 | 226 | 288 | 66250000 | -0.15378 | 0.026932 | 0 |
| chr18 | 66650001 | 66750000 | 231 | 299 | 66700000 | -0.17629 | 0.013646 | 0 |
| chr18 | 66750001 | 66850000 | 225 | 289 | 66800000 | -0.16518 | 0.019248 | 0 |
| chr18 | 66850001 | 66950000 | 203 | 255 | 66900000 | -0.13305 | 0.047474 | 0 |
| chr18 | 67200001 | 67300000 | 218 | 280 | 67250000 | -0.16514 | 0.019275 | 0 |
| chr18 | 67900001 | 68000000 | 293 | 303 | 67950000 | 0.147546 | 0.031218 | 0 |
| chr18 | 68250001 | 68350000 | 276 | 285 | 68300000 | 0.149669 | 0.029381 | 0 |
| chr18 | 69550001 | 69650000 | 194 | 250 | 69600000 | -0.16991 | 0.016661 | 0 |
| chr18 | 69600001 | 69700000 | 195 | 254 | 69650000 | -0.18539 | 0.01017  | 0 |
| chr18 | 70150001 | 70250000 | 257 | 261 | 70200000 | 0.173682 | 0.014164 | 0 |
| chr18 | 70400001 | 70500000 | 205 | 259 | 70450000 | -0.14137 | 0.038081 | 0 |
| chr18 | 70750001 | 70850000 | 204 | 260 | 70800000 | -0.15398 | 0.02678  | 0 |
| chr18 | 70850001 | 70950000 | 196 | 254 | 70900000 | -0.17801 | 0.012919 | 0 |
| chr18 | 71150001 | 71250000 | 223 | 230 | 71200000 | 0.151373 | 0.027973 | 0 |
| chr18 | 71300001 | 71400000 | 238 | 306 | 71350000 | -0.16661 | 0.018434 | 0 |
| chr18 | 71400001 | 71500000 | 233 | 296 | 71450000 | -0.1493  | 0.030588 | 0 |
| chr18 | 71450001 | 71550000 | 229 | 289 | 71500000 | -0.13976 | 0.039767 | 0 |
| chr18 | 72250001 | 72350000 | 151 | 153 | 72300000 | 0.17698  | 0.012732 | 0 |
| chr18 | 72550001 | 72650000 | 262 | 329 | 72600000 | -0.13256 | 0.04809  | 0 |
| chr18 | 72600001 | 72700000 | 262 | 331 | 72650000 | -0.1413  | 0.038146 | 0 |
| chr18 | 72750001 | 72850000 | 297 | 310 | 72800000 | 0.134158 | 0.045111 | 0 |
| chr18 | 72800001 | 72900000 | 315 | 329 | 72850000 | 0.133227 | 0.046238 | 0 |
| chr18 | 73050001 | 73150000 | 245 | 310 | 73100000 | -0.14352 | 0.035908 | 0 |
| chr18 | 73100001 | 73200000 | 236 | 302 | 73150000 | -0.1598  | 0.022605 | 0 |
| chr18 | 73600001 | 73700000 | 225 | 286 | 73650000 | -0.15013 | 0.029887 | 0 |
| chr18 | 73950001 | 74050000 | 249 | 252 | 7.40E+07 | 0.178685 | 0.012043 | 0 |
| chr18 | 74100001 | 74200000 | 314 | 319 | 74150000 | 0.173171 | 0.014397 | 0 |
| chr18 | 74400001 | 74500000 | 260 | 269 | 74450000 | 0.146868 | 0.031824 | 0 |
| chr18 | 74850001 | 74950000 | 331 | 344 | 74900000 | 0.140386 | 0.038128 | 0 |
| chr18 | 74900001 | 75000000 | 293 | 303 | 74950000 | 0.147546 | 0.031218 | 0 |
| chr18 | 75050001 | 75150000 | 224 | 287 | 75100000 | -0.16159 | 0.021437 | 0 |
| chr18 | 75100001 | 75200000 | 231 | 298 | 75150000 | -0.17146 | 0.015881 | 0 |
| chr18 | 75300001 | 75400000 | 253 | 320 | 75350000 | -0.14297 | 0.036454 | 0 |
| chr18 | 75700001 | 75800000 | 140 | 176 | 75750000 | -0.13419 | 0.046095 | 0 |
| chr18 | 75950001 | 76050000 | 265 | 275 | 7.60E+07 | 0.142524 | 0.035945 | 0 |
| chr18 | 76150001 | 76250000 | 309 | 316 | 76200000 | 0.163645 | 0.019403 | 0 |
| chr18 | 76400001 | 76500000 | 308 | 314 | 76450000 | 0.168129 | 0.016887 | 0 |
| chr18 | 76500001 | 76600000 | 333 | 337 | 76550000 | 0.178737 | 0.012022 | 0 |
| chr18 | 77250001 | 77350000 | 374 | 390 | 77300000 | 0.135527 | 0.043493 | 0 |
| chr18 | 77600001 | 77700000 | 356 | 371 | 77650000 | 0.136421 | 0.042463 | 0 |
| chr18 | 77650001 | 77750000 | 345 | 357 | 77700000 | 0.146635 | 0.032035 | 0 |
| chr18 | 77700001 | 77800000 | 301 | 314 | 77750000 | 0.134962 | 0.044155 | 0 |
| chr18 | 77850001 | 77950000 | 352 | 363 | 77900000 | 0.151569 | 0.027814 | 0 |
| chr19 | 1        | 100000   | 1   | 3   | 50000    | -1.389   | 6.26E-48 | 0 |

|       |         |         |      |      |          |          |          |   |
|-------|---------|---------|------|------|----------|----------|----------|---|
| chr19 | 50001   | 150000  | 4    | 6    | 1.00E+05 | -0.389   | 8.31E-07 | 0 |
| chr19 | 100001  | 200000  | 3    | 5    | 150000   | -0.541   | 2.84E-11 | 0 |
| chr19 | 150001  | 250000  | 8    | 14   | 2.00E+05 | -0.61139 | 1.08E-13 | 0 |
| chr19 | 200001  | 300000  | 404  | 400  | 250000   | 0.210318 | 0.003979 | 0 |
| chr19 | 350001  | 450000  | 1033 | 1041 | 4.00E+05 | 0.184833 | 0.009819 | 0 |
| chr19 | 400001  | 500000  | 1081 | 1082 | 450000   | 0.194629 | 0.007015 | 0 |
| chr19 | 450001  | 550000  | 1036 | 1026 | 5.00E+05 | 0.209956 | 0.004033 | 0 |
| chr19 | 500001  | 600000  | 1073 | 1014 | 550000   | 0.277555 | 0.000236 | 0 |
| chr19 | 550001  | 650000  | 1072 | 1037 | 6.00E+05 | 0.243852 | 0.001054 | 0 |
| chr19 | 750001  | 850000  | 1081 | 1074 | 8.00E+05 | 0.205336 | 0.004782 | 0 |
| chr19 | 800001  | 900000  | 1158 | 1089 | 850000   | 0.284594 | 0.000169 | 0 |
| chr19 | 850001  | 950000  | 1145 | 1010 | 9.00E+05 | 0.376955 | 1.13E-06 | 0 |
| chr19 | 900001  | 1000000 | 1152 | 1012 | 950000   | 0.382894 | 7.86E-07 | 0 |
| chr19 | 950001  | 1050000 | 1135 | 1039 | 1.00E+06 | 0.32346  | 2.37E-05 | 0 |
| chr19 | 1000001 | 1100000 | 1148 | 1080 | 1050000  | 0.284054 | 0.000174 | 0 |
| chr19 | 1050001 | 1150000 | 1194 | 1131 | 1100000  | 0.274167 | 0.000276 | 0 |
| chr19 | 1100001 | 1200000 | 1047 | 999  | 1150000  | 0.263668 | 0.000446 | 0 |
| chr19 | 1150001 | 1250000 | 845  | 822  | 1200000  | 0.235776 | 0.001472 | 0 |
| chr19 | 1200001 | 1300000 | 1065 | 998  | 1250000  | 0.289705 | 0.000132 | 0 |
| chr19 | 1250001 | 1350000 | 1097 | 1057 | 1300000  | 0.249551 | 0.000827 | 0 |
| chr19 | 1300001 | 1400000 | 1031 | 1037 | 1350000  | 0.187591 | 0.008944 | 0 |
| chr19 | 1350001 | 1450000 | 1260 | 1132 | 1400000  | 0.350513 | 5.34E-06 | 0 |
| chr19 | 1400001 | 1500000 | 1283 | 1047 | 1450000  | 0.489223 | 5.48E-10 | 0 |
| chr19 | 1450001 | 1550000 | 1126 | 1026 | 1500000  | 0.330139 | 1.66E-05 | 0 |
| chr19 | 1500001 | 1600000 | 1033 | 1011 | 1550000  | 0.22702  | 0.002094 | 0 |
| chr19 | 1550001 | 1650000 | 1114 | 1038 | 1600000  | 0.297906 | 8.84E-05 | 0 |
| chr19 | 1600001 | 1700000 | 1152 | 1070 | 1650000  | 0.302493 | 7.03E-05 | 0 |
| chr19 | 1650001 | 1750000 | 1088 | 1020 | 1700000  | 0.289072 | 0.000136 | 0 |
| chr19 | 1700001 | 1800000 | 1092 | 1097 | 1750000  | 0.189372 | 0.008416 | 0 |
| chr19 | 1750001 | 1850000 | 1203 | 1209 | 1800000  | 0.188785 | 0.008587 | 0 |
| chr19 | 1800001 | 1900000 | 1143 | 1086 | 1850000  | 0.269764 | 0.000338 | 0 |
| chr19 | 1850001 | 1950000 | 1055 | 1014 | 1900000  | 0.253148 | 0.000709 | 0 |
| chr19 | 1950001 | 2050000 | 1106 | 1035 | 2.00E+06 | 0.291684 | 0.00012  | 0 |
| chr19 | 2000001 | 2100000 | 1049 | 943  | 2050000  | 0.349648 | 5.61E-06 | 0 |
| chr19 | 2050001 | 2150000 | 1069 | 1045 | 2100000  | 0.228722 | 0.001957 | 0 |
| chr19 | 2100001 | 2200000 | 1049 | 1033 | 2150000  | 0.218137 | 0.002961 | 0 |
| chr19 | 2150001 | 2250000 | 1206 | 1110 | 2200000  | 0.315633 | 3.58E-05 | 0 |
| chr19 | 2200001 | 2300000 | 1236 | 1118 | 2250000  | 0.340722 | 9.27E-06 | 0 |
| chr19 | 2250001 | 2350000 | 1121 | 1016 | 2300000  | 0.337849 | 1.09E-05 | 0 |
| chr19 | 2300001 | 2400000 | 1101 | 1014 | 2350000  | 0.31472  | 3.76E-05 | 0 |
| chr19 | 2350001 | 2450000 | 1037 | 999  | 2400000  | 0.249822 | 0.000818 | 0 |
| chr19 | 2400001 | 2500000 | 1038 | 982  | 2450000  | 0.275975 | 0.000254 | 0 |
| chr19 | 2450001 | 2550000 | 965  | 924  | 2500000  | 0.258599 | 0.000558 | 0 |
| chr19 | 2600001 | 2700000 | 1013 | 1010 | 2650000  | 0.200242 | 0.00575  | 0 |
| chr19 | 2650001 | 2750000 | 1070 | 1013 | 2700000  | 0.27494  | 0.000266 | 0 |
| chr19 | 2700001 | 2800000 | 1128 | 1089 | 2750000  | 0.246726 | 0.000933 | 0 |
| chr19 | 2750001 | 2850000 | 1103 | 1076 | 2800000  | 0.231718 | 0.001736 | 0 |

|       |         |         |      |      |          |          |          |   |
|-------|---------|---------|------|------|----------|----------|----------|---|
| chr19 | 2800001 | 2900000 | 1026 | 973  | 2850000  | 0.272482 | 0.000299 | 0 |
| chr19 | 2850001 | 2950000 | 913  | 852  | 2900000  | 0.295724 | 9.85E-05 | 0 |
| chr19 | 2900001 | 3000000 | 853  | 830  | 2950000  | 0.235397 | 0.001495 | 0 |
| chr19 | 3000001 | 3100000 | 977  | 963  | 3050000  | 0.216786 | 0.003118 | 0 |
| chr19 | 3050001 | 3150000 | 1061 | 1017 | 3100000  | 0.257068 | 0.000597 | 0 |
| chr19 | 3100001 | 3200000 | 1087 | 1084 | 3150000  | 0.19995  | 0.00581  | 0 |
| chr19 | 3250001 | 3350000 | 1041 | 986  | 3300000  | 0.274274 | 0.000275 | 0 |
| chr19 | 3300001 | 3400000 | 1055 | 984  | 3350000  | 0.296476 | 9.49E-05 | 0 |
| chr19 | 3350001 | 3450000 | 1055 | 1004 | 3400000  | 0.267447 | 0.000376 | 0 |
| chr19 | 3400001 | 3500000 | 1121 | 1099 | 3450000  | 0.224558 | 0.002308 | 0 |
| chr19 | 3450001 | 3550000 | 1229 | 1184 | 3500000  | 0.249779 | 0.000819 | 0 |
| chr19 | 3500001 | 3600000 | 1114 | 996  | 3550000  | 0.357495 | 3.58E-06 | 0 |
| chr19 | 3550001 | 3650000 | 1162 | 1019 | 3600000  | 0.385419 | 6.73E-07 | 0 |
| chr19 | 3600001 | 3700000 | 1317 | 1244 | 3650000  | 0.278232 | 0.000229 | 0 |
| chr19 | 3650001 | 3750000 | 1097 | 1067 | 3700000  | 0.235966 | 0.001461 | 0 |
| chr19 | 3800001 | 3900000 | 997  | 975  | 3850000  | 0.228154 | 0.002002 | 0 |
| chr19 | 4000001 | 4100000 | 1140 | 1084 | 4050000  | 0.268632 | 0.000356 | 0 |
| chr19 | 4050001 | 4150000 | 1120 | 981  | 4100000  | 0.387137 | 6.05E-07 | 0 |
| chr19 | 4100001 | 4200000 | 1059 | 977  | 4150000  | 0.312235 | 4.28E-05 | 0 |
| chr19 | 4150001 | 4250000 | 978  | 966  | 4200000  | 0.213774 | 0.003496 | 0 |
| chr19 | 4200001 | 4300000 | 903  | 909  | 4250000  | 0.186409 | 0.009311 | 0 |
| chr19 | 4350001 | 4450000 | 1110 | 1084 | 4400000  | 0.230158 | 0.001848 | 0 |
| chr19 | 4500001 | 4600000 | 1083 | 1058 | 4550000  | 0.229657 | 0.001886 | 0 |
| chr19 | 4550001 | 4650000 | 1011 | 939  | 4600000  | 0.302549 | 7.01E-05 | 0 |
| chr19 | 4600001 | 4700000 | 1068 | 1010 | 4650000  | 0.276519 | 0.000248 | 0 |
| chr19 | 4650001 | 4750000 | 1163 | 1105 | 4700000  | 0.269768 | 0.000338 | 0 |
| chr19 | 4750001 | 4850000 | 563  | 565  | 4800000  | 0.190847 | 0.008    | 0 |
| chr19 | 4800001 | 4900000 | 513  | 494  | 4850000  | 0.250411 | 0.000797 | 0 |
| chr19 | 4850001 | 4950000 | 580  | 543  | 4900000  | 0.291064 | 0.000124 | 0 |
| chr19 | 4900001 | 5000000 | 688  | 634  | 4950000  | 0.313889 | 3.93E-05 | 0 |
| chr19 | 4950001 | 5050000 | 733  | 707  | 5.00E+06 | 0.248066 | 0.000882 | 0 |
| chr19 | 5000001 | 5100000 | 826  | 769  | 5050000  | 0.299121 | 8.32E-05 | 0 |
| chr19 | 5150001 | 5250000 | 672  | 654  | 5200000  | 0.235134 | 0.001511 | 0 |
| chr19 | 5300001 | 5400000 | 705  | 688  | 5350000  | 0.231178 | 0.001774 | 0 |
| chr19 | 5550001 | 5650000 | 699  | 671  | 5600000  | 0.254943 | 0.000655 | 0 |
| chr19 | 5600001 | 5700000 | 706  | 694  | 5650000  | 0.220696 | 0.002683 | 0 |
| chr19 | 5650001 | 5750000 | 632  | 608  | 5700000  | 0.251816 | 0.000751 | 0 |
| chr19 | 5700001 | 5800000 | 570  | 543  | 5750000  | 0.265973 | 0.000402 | 0 |
| chr19 | 6350001 | 6450000 | 668  | 634  | 6400000  | 0.271328 | 0.000315 | 0 |
| chr19 | 6450001 | 6550000 | 629  | 625  | 6500000  | 0.205167 | 0.004812 | 0 |
| chr19 | 6500001 | 6600000 | 603  | 545  | 6550000  | 0.341865 | 8.70E-06 | 0 |
| chr19 | 6550001 | 6650000 | 546  | 538  | 6600000  | 0.217258 | 0.003062 | 0 |
| chr19 | 7300001 | 7400000 | 48   | 45   | 7350000  | 0.289072 | 0.000136 | 0 |
| chr19 | 7400001 | 7500000 | 610  | 613  | 7450000  | 0.188885 | 0.008558 | 0 |
| chr19 | 7450001 | 7550000 | 638  | 599  | 7500000  | 0.286963 | 0.000151 | 0 |
| chr19 | 7500001 | 7600000 | 728  | 648  | 7550000  | 0.363908 | 2.46E-06 | 0 |
| chr19 | 7550001 | 7650000 | 692  | 691  | 7600000  | 0.198049 | 0.006218 | 0 |



|       |          |          |      |      |          |          |          |   |
|-------|----------|----------|------|------|----------|----------|----------|---|
| chr19 | 7650001  | 7750000  | 822  | 761  | 7700000  | 0.307205 | 5.54E-05 | 0 |
| chr19 | 7700001  | 7800000  | 728  | 701  | 7750000  | 0.250487 | 0.000795 | 0 |
| chr19 | 7750001  | 7850000  | 654  | 625  | 7800000  | 0.261397 | 0.000493 | 0 |
| chr19 | 7800001  | 7900000  | 646  | 602  | 7850000  | 0.297734 | 8.92E-05 | 0 |
| chr19 | 7950001  | 8050000  | 715  | 684  | 8.00E+06 | 0.25991  | 0.000527 | 0 |
| chr19 | 8000001  | 8100000  | 666  | 656  | 8050000  | 0.217789 | 0.003001 | 0 |
| chr19 | 8300001  | 8400000  | 473  | 437  | 8350000  | 0.31017  | 4.76E-05 | 0 |
| chr19 | 8350001  | 8450000  | 519  | 480  | 8400000  | 0.308663 | 5.14E-05 | 0 |
| chr19 | 8400001  | 8500000  | 564  | 521  | 8450000  | 0.310375 | 4.71E-05 | 0 |
| chr19 | 8450001  | 8550000  | 630  | 597  | 8500000  | 0.273584 | 0.000284 | 0 |
| chr19 | 8500001  | 8600000  | 684  | 686  | 8550000  | 0.191751 | 0.007754 | 0 |
| chr19 | 9200001  | 9300000  | 643  | 587  | 9250000  | 0.327421 | 1.92E-05 | 0 |
| chr19 | 9350001  | 9450000  | 536  | 540  | 9400000  | 0.185237 | 0.009687 | 0 |
| chr19 | 9550001  | 9650000  | 444  | 579  | 9600000  | -0.18704 | 0.009631 | 0 |
| chr19 | 10150001 | 10250000 | 655  | 659  | 10200000 | 0.187179 | 0.00907  | 0 |
| chr19 | 10350001 | 10450000 | 673  | 654  | 10400000 | 0.237279 | 0.001384 | 0 |
| chr19 | 10400001 | 10500000 | 667  | 595  | 10450000 | 0.36076  | 2.96E-06 | 0 |
| chr19 | 10450001 | 10550000 | 610  | 586  | 10500000 | 0.253872 | 0.000687 | 0 |
| chr19 | 10500001 | 10600000 | 640  | 610  | 10550000 | 0.265226 | 0.000416 | 0 |
| chr19 | 10650001 | 10750000 | 626  | 552  | 10700000 | 0.377457 | 1.10E-06 | 0 |
| chr19 | 10700001 | 10800000 | 664  | 611  | 10750000 | 0.315974 | 3.52E-05 | 0 |
| chr19 | 10750001 | 10850000 | 677  | 658  | 10800000 | 0.237031 | 0.001399 | 0 |
| chr19 | 10900001 | 11000000 | 676  | 669  | 10950000 | 0.21098  | 0.003882 | 0 |
| chr19 | 10950001 | 11050000 | 652  | 647  | 1.10E+07 | 0.207069 | 0.004488 | 0 |
| chr19 | 11050001 | 11150000 | 676  | 643  | 11100000 | 0.268168 | 0.000364 | 0 |
| chr19 | 11100001 | 11200000 | 735  | 625  | 11150000 | 0.429851 | 3.80E-08 | 0 |
| chr19 | 11150001 | 11250000 | 638  | 552  | 11200000 | 0.404851 | 1.98E-07 | 0 |
| chr19 | 11200001 | 11300000 | 621  | 598  | 11250000 | 0.250411 | 0.000797 | 0 |
| chr19 | 11250001 | 11350000 | 687  | 689  | 11300000 | 0.191769 | 0.007749 | 0 |
| chr19 | 11300001 | 11400000 | 662  | 639  | 11350000 | 0.246978 | 0.000923 | 0 |
| chr19 | 11350001 | 11450000 | 570  | 564  | 11400000 | 0.21123  | 0.003846 | 0 |
| chr19 | 11450001 | 11550000 | 652  | 640  | 11500000 | 0.222763 | 0.002476 | 0 |
| chr19 | 11500001 | 11600000 | 653  | 655  | 11550000 | 0.191551 | 0.007808 | 0 |
| chr19 | 11550001 | 11650000 | 679  | 676  | 11600000 | 0.202351 | 0.00533  | 0 |
| chr19 | 11600001 | 11700000 | 655  | 655  | 11650000 | 0.195963 | 0.006694 | 0 |
| chr19 | 12450001 | 12550000 | 462  | 435  | 12500000 | 0.28284  | 0.000184 | 0 |
| chr19 | 12500001 | 12600000 | 405  | 406  | 12550000 | 0.192405 | 0.00758  | 0 |
| chr19 | 12700001 | 12800000 | 611  | 601  | 12750000 | 0.21977  | 0.002781 | 0 |
| chr19 | 12750001 | 12850000 | 696  | 681  | 12800000 | 0.227396 | 0.002063 | 0 |
| chr19 | 12800001 | 12900000 | 701  | 702  | 12850000 | 0.193906 | 0.007194 | 0 |
| chr19 | 12850001 | 12950000 | 822  | 823  | 12900000 | 0.194209 | 0.007119 | 0 |
| chr19 | 12900001 | 13000000 | 993  | 962  | 12950000 | 0.24172  | 0.001152 | 0 |
| chr19 | 12950001 | 13050000 | 1019 | 994  | 1.30E+07 | 0.231799 | 0.00173  | 0 |
| chr19 | 13000001 | 13100000 | 1018 | 977  | 13050000 | 0.25527  | 0.000646 | 0 |
| chr19 | 13050001 | 13150000 | 1196 | 1190 | 13100000 | 0.203219 | 0.005165 | 0 |
| chr19 | 13200001 | 13300000 | 1302 | 1280 | 13250000 | 0.220549 | 0.002698 | 0 |
| chr19 | 13800001 | 13900000 | 1222 | 1152 | 13850000 | 0.281067 | 0.0002   | 0 |

|       |          |          |      |      |          |          |          |   |
|-------|----------|----------|------|------|----------|----------|----------|---|
| chr19 | 13850001 | 13950000 | 1302 | 1191 | 13900000 | 0.324519 | 2.24E-05 | 0 |
| chr19 | 13900001 | 14000000 | 1352 | 1301 | 13950000 | 0.251437 | 0.000763 | 0 |
| chr19 | 13950001 | 14050000 | 1419 | 1368 | 1.40E+07 | 0.248769 | 0.000855 | 0 |
| chr19 | 14000001 | 14100000 | 1438 | 1405 | 14050000 | 0.229457 | 0.001901 | 0 |
| chr19 | 14050001 | 14150000 | 1276 | 1243 | 14100000 | 0.233765 | 0.001598 | 0 |
| chr19 | 14100001 | 14200000 | 1175 | 1156 | 14150000 | 0.219482 | 0.002812 | 0 |
| chr19 | 14150001 | 14250000 | 1307 | 1266 | 14200000 | 0.241945 | 0.001141 | 0 |
| chr19 | 14200001 | 14300000 | 1467 | 1399 | 14250000 | 0.264436 | 0.000431 | 0 |
| chr19 | 14500001 | 14600000 | 1339 | 1315 | 14550000 | 0.222056 | 0.002545 | 0 |
| chr19 | 14550001 | 14650000 | 1352 | 1206 | 14600000 | 0.360828 | 2.95E-06 | 0 |
| chr19 | 14600001 | 14700000 | 1221 | 1141 | 14650000 | 0.293727 | 0.000109 | 0 |
| chr19 | 15150001 | 15250000 | 1329 | 1315 | 15200000 | 0.211241 | 0.003845 | 0 |
| chr19 | 15350001 | 15450000 | 1474 | 1480 | 15400000 | 0.190102 | 0.008208 | 0 |
| chr19 | 15450001 | 15550000 | 1318 | 1282 | 15500000 | 0.235917 | 0.001464 | 0 |
| chr19 | 16100001 | 16200000 | 959  | 913  | 16150000 | 0.266879 | 0.000386 | 0 |
| chr19 | 16150001 | 16250000 | 945  | 927  | 16200000 | 0.223708 | 0.002386 | 0 |
| chr19 | 16550001 | 16650000 | 958  | 907  | 16600000 | 0.274886 | 0.000267 | 0 |
| chr19 | 16650001 | 16750000 | 1092 | 1085 | 16700000 | 0.205241 | 0.004799 | 0 |
| chr19 | 17300001 | 17400000 | 1339 | 1247 | 17350000 | 0.298658 | 8.52E-05 | 0 |
| chr19 | 17350001 | 17450000 | 1398 | 1290 | 17400000 | 0.311956 | 4.34E-05 | 0 |
| chr19 | 17400001 | 17500000 | 1361 | 1292 | 17450000 | 0.271024 | 0.000319 | 0 |
| chr19 | 17450001 | 17550000 | 1232 | 1150 | 17500000 | 0.295331 | 0.0001   | 0 |
| chr19 | 17500001 | 17600000 | 1262 | 1146 | 17550000 | 0.335068 | 1.27E-05 | 0 |
| chr19 | 17550001 | 17650000 | 1329 | 1218 | 17600000 | 0.32179  | 2.59E-05 | 0 |
| chr19 | 17600001 | 17700000 | 1311 | 1228 | 17650000 | 0.29032  | 0.000128 | 0 |
| chr19 | 17650001 | 17750000 | 1302 | 1235 | 17700000 | 0.272181 | 0.000303 | 0 |
| chr19 | 17700001 | 17800000 | 1336 | 1265 | 17750000 | 0.274746 | 0.000269 | 0 |
| chr19 | 17750001 | 17850000 | 1278 | 1277 | 17800000 | 0.197092 | 0.006432 | 0 |
| chr19 | 18000001 | 18100000 | 1182 | 1170 | 18050000 | 0.210685 | 0.003925 | 0 |
| chr19 | 18050001 | 18150000 | 1320 | 1284 | 18100000 | 0.235856 | 0.001468 | 0 |
| chr19 | 18200001 | 18300000 | 1416 | 1265 | 18250000 | 0.358647 | 3.35E-06 | 0 |
| chr19 | 18250001 | 18350000 | 1343 | 1245 | 18300000 | 0.305277 | 6.11E-05 | 0 |
| chr19 | 18300001 | 18400000 | 1380 | 1302 | 18350000 | 0.279902 | 0.000211 | 0 |
| chr19 | 18350001 | 18450000 | 1457 | 1273 | 18400000 | 0.390731 | 4.84E-07 | 0 |
| chr19 | 18400001 | 18500000 | 1383 | 1236 | 18450000 | 0.358085 | 3.46E-06 | 0 |
| chr19 | 18450001 | 18550000 | 1418 | 1357 | 18500000 | 0.2594   | 0.000539 | 0 |
| chr19 | 18500001 | 18600000 | 1634 | 1555 | 18550000 | 0.267456 | 0.000376 | 0 |
| chr19 | 18550001 | 18650000 | 1582 | 1503 | 18600000 | 0.269868 | 0.000337 | 0 |
| chr19 | 18650001 | 18750000 | 1348 | 1341 | 18700000 | 0.203474 | 0.005118 | 0 |
| chr19 | 18950001 | 19050000 | 759  | 753  | 1.90E+07 | 0.207413 | 0.004431 | 0 |
| chr19 | 19000001 | 19100000 | 668  | 638  | 19050000 | 0.262255 | 0.000475 | 0 |
| chr19 | 19100001 | 19200000 | 710  | 687  | 19150000 | 0.243472 | 0.001071 | 0 |
| chr19 | 19150001 | 19250000 | 715  | 651  | 19200000 | 0.331249 | 1.56E-05 | 0 |
| chr19 | 19250001 | 19350000 | 677  | 679  | 19300000 | 0.191707 | 0.007766 | 0 |
| chr19 | 19400001 | 19500000 | 645  | 628  | 19450000 | 0.234498 | 0.001551 | 0 |
| chr19 | 20100001 | 20200000 | 418  | 416  | 20150000 | 0.202882 | 0.005229 | 0 |
| chr19 | 20300001 | 20400000 | 340  | 342  | 20350000 | 0.187501 | 0.008972 | 0 |

|       |          |          |     |     |          |          |          |   |
|-------|----------|----------|-----|-----|----------|----------|----------|---|
| chr19 | 20550001 | 20650000 | 190 | 187 | 20600000 | 0.218924 | 0.002873 | 0 |
| chr19 | 20850001 | 20950000 | 254 | 348 | 20900000 | -0.2583  | 0.000648 | 0 |
| chr19 | 20900001 | 21000000 | 230 | 314 | 20950000 | -0.25317 | 0.000805 | 0 |
| chr19 | 21450001 | 21550000 | 368 | 370 | 21500000 | 0.188144 | 0.008778 | 0 |
| chr19 | 21900001 | 22000000 | 315 | 413 | 21950000 | -0.19483 | 0.007411 | 0 |
| chr19 | 22000001 | 22100000 | 343 | 336 | 22050000 | 0.22571  | 0.002206 | 0 |
| chr19 | 22400001 | 22500000 | 256 | 339 | 22450000 | -0.20918 | 0.004477 | 0 |
| chr19 | 22800001 | 22900000 | 210 | 275 | 22850000 | -0.19308 | 0.007865 | 0 |
| chr19 | 22850001 | 22950000 | 237 | 315 | 22900000 | -0.2145  | 0.003687 | 0 |
| chr19 | 23100001 | 23200000 | 245 | 332 | 23150000 | -0.24244 | 0.001253 | 0 |
| chr19 | 23150001 | 23250000 | 293 | 390 | 23200000 | -0.21661 | 0.003411 | 0 |
| chr19 | 24300001 | 24400000 | 289 | 415 | 24350000 | -0.32608 | 2.68E-05 | 0 |
| chr19 | 24350001 | 24450000 | 289 | 401 | 24400000 | -0.27657 | 0.000291 | 0 |
| chr19 | 24550001 | 24650000 | 270 | 354 | 24600000 | -0.19483 | 0.007411 | 0 |
| chr19 | 24600001 | 24700000 | 12  | 22  | 24650000 | -0.67851 | 3.57E-16 | 0 |
| chr19 | 28050001 | 28150000 | 471 | 629 | 28100000 | -0.22137 | 0.002855 | 0 |
| chr19 | 31600001 | 31700000 | 701 | 933 | 31650000 | -0.2165  | 0.003425 | 0 |
| chr19 | 33550001 | 33650000 | 614 | 588 | 33600000 | 0.258386 | 0.000564 | 0 |
| chr19 | 34200001 | 34300000 | 778 | 773 | 34250000 | 0.205265 | 0.004795 | 0 |
| chr19 | 34850001 | 34950000 | 659 | 599 | 34900000 | 0.333685 | 1.37E-05 | 0 |
| chr19 | 34900001 | 35000000 | 666 | 604 | 34950000 | 0.336937 | 1.14E-05 | 0 |
| chr19 | 35500001 | 35600000 | 762 | 738 | 35550000 | 0.242133 | 0.001132 | 0 |
| chr19 | 35550001 | 35650000 | 780 | 717 | 35600000 | 0.317464 | 3.26E-05 | 0 |
| chr19 | 35700001 | 35800000 | 680 | 667 | 35750000 | 0.223811 | 0.002377 | 0 |
| chr19 | 35750001 | 35850000 | 723 | 701 | 35800000 | 0.240544 | 0.00121  | 0 |
| chr19 | 36050001 | 36150000 | 655 | 652 | 36100000 | 0.202586 | 0.005285 | 0 |
| chr19 | 36200001 | 36300000 | 784 | 782 | 36250000 | 0.199648 | 0.005874 | 0 |
| chr19 | 36300001 | 36400000 | 697 | 668 | 36350000 | 0.257274 | 0.000592 | 0 |
| chr19 | 36350001 | 36450000 | 659 | 632 | 36400000 | 0.256317 | 0.000617 | 0 |
| chr19 | 36400001 | 36500000 | 633 | 636 | 36450000 | 0.189142 | 0.008483 | 0 |
| chr19 | 36550001 | 36650000 | 688 | 642 | 36600000 | 0.295798 | 9.81E-05 | 0 |
| chr19 | 36600001 | 36700000 | 564 | 549 | 36650000 | 0.234852 | 0.001529 | 0 |
| chr19 | 37750001 | 37850000 | 239 | 327 | 37800000 | -0.25632 | 0.000705 | 0 |
| chr19 | 38300001 | 38400000 | 547 | 549 | 38350000 | 0.190698 | 0.008042 | 0 |
| chr19 | 38350001 | 38450000 | 586 | 583 | 38400000 | 0.203368 | 0.005138 | 0 |
| chr19 | 38750001 | 38850000 | 659 | 659 | 38800000 | 0.195963 | 0.006694 | 0 |
| chr19 | 38800001 | 38900000 | 667 | 651 | 38850000 | 0.230992 | 0.001787 | 0 |
| chr19 | 38850001 | 38950000 | 701 | 689 | 38900000 | 0.220873 | 0.002665 | 0 |
| chr19 | 38900001 | 39000000 | 718 | 720 | 38950000 | 0.19195  | 0.007701 | 0 |
| chr19 | 39100001 | 39200000 | 717 | 698 | 39150000 | 0.234709 | 0.001538 | 0 |
| chr19 | 39600001 | 39700000 | 728 | 699 | 39650000 | 0.254609 | 0.000665 | 0 |
| chr19 | 39850001 | 39950000 | 741 | 711 | 39900000 | 0.255587 | 0.000637 | 0 |
| chr19 | 39900001 | 40000000 | 741 | 714 | 39950000 | 0.249513 | 0.000829 | 0 |
| chr19 | 39950001 | 40050000 | 681 | 656 | 4.00E+07 | 0.249922 | 0.000814 | 0 |
| chr19 | 40700001 | 40800000 | 717 | 711 | 40750000 | 0.208087 | 0.004323 | 0 |
| chr19 | 40750001 | 40850000 | 654 | 636 | 40800000 | 0.236227 | 0.001445 | 0 |
| chr19 | 40950001 | 41050000 | 712 | 676 | 4.10E+07 | 0.270817 | 0.000322 | 0 |

|       |          |          |      |      |          |          |          |   |
|-------|----------|----------|------|------|----------|----------|----------|---|
| chr19 | 41000001 | 41100000 | 692  | 670  | 41050000 | 0.242574 | 0.001112 | 0 |
| chr19 | 41050001 | 41150000 | 702  | 672  | 41100000 | 0.258973 | 0.000549 | 0 |
| chr19 | 41100001 | 41200000 | 698  | 675  | 41150000 | 0.244303 | 0.001034 | 0 |
| chr19 | 41200001 | 41300000 | 678  | 679  | 41250000 | 0.193837 | 0.007212 | 0 |
| chr19 | 41250001 | 41350000 | 593  | 547  | 41300000 | 0.312454 | 4.23E-05 | 0 |
| chr19 | 41300001 | 41400000 | 393  | 389  | 41350000 | 0.210722 | 0.00392  | 0 |
| chr19 | 41400001 | 41500000 | 442  | 445  | 41450000 | 0.186204 | 0.009375 | 0 |
| chr19 | 41650001 | 41750000 | 617  | 596  | 41700000 | 0.245921 | 0.000966 | 0 |
| chr19 | 41700001 | 41800000 | 718  | 704  | 41750000 | 0.224371 | 0.002325 | 0 |
| chr19 | 41750001 | 41850000 | 728  | 724  | 41800000 | 0.203912 | 0.005037 | 0 |
| chr19 | 41800001 | 41900000 | 713  | 654  | 41850000 | 0.320574 | 2.77E-05 | 0 |
| chr19 | 41850001 | 41950000 | 703  | 685  | 41900000 | 0.233384 | 0.001623 | 0 |
| chr19 | 42350001 | 42450000 | 828  | 798  | 42400000 | 0.249205 | 0.00084  | 0 |
| chr19 | 42400001 | 42500000 | 869  | 787  | 42450000 | 0.338956 | 1.02E-05 | 0 |
| chr19 | 42450001 | 42550000 | 781  | 714  | 42500000 | 0.325362 | 2.14E-05 | 0 |
| chr19 | 42500001 | 42600000 | 770  | 755  | 42550000 | 0.224345 | 0.002327 | 0 |
| chr19 | 42550001 | 42650000 | 913  | 918  | 42600000 | 0.188084 | 0.008795 | 0 |
| chr19 | 42700001 | 42800000 | 1236 | 1155 | 42750000 | 0.293749 | 0.000109 | 0 |
| chr19 | 42750001 | 42850000 | 1204 | 1117 | 42800000 | 0.304169 | 6.46E-05 | 0 |
| chr19 | 42850001 | 42950000 | 1127 | 1135 | 42900000 | 0.185758 | 0.009518 | 0 |
| chr19 | 43200001 | 43300000 | 241  | 212  | 43250000 | 0.380932 | 8.86E-07 | 0 |
| chr19 | 43350001 | 43450000 | 247  | 233  | 43400000 | 0.280144 | 0.000209 | 0 |
| chr19 | 43400001 | 43500000 | 243  | 226  | 43450000 | 0.300597 | 7.73E-05 | 0 |
| chr19 | 43600001 | 43700000 | 253  | 247  | 43650000 | 0.230589 | 0.001816 | 0 |
| chr19 | 43950001 | 44050000 | 1004 | 990  | 4.40E+07 | 0.216222 | 0.003186 | 0 |
| chr19 | 44000001 | 44100000 | 1061 | 1040 | 44050000 | 0.224804 | 0.002286 | 0 |
| chr19 | 45400001 | 45500000 | 924  | 924  | 45450000 | 0.195963 | 0.006694 | 0 |
| chr19 | 45600001 | 45700000 | 1122 | 1114 | 45650000 | 0.206286 | 0.004619 | 0 |
| chr19 | 45650001 | 45750000 | 975  | 965  | 45700000 | 0.210836 | 0.003903 | 0 |
| chr19 | 45800001 | 45900000 | 1028 | 957  | 45850000 | 0.299212 | 8.28E-05 | 0 |
| chr19 | 45850001 | 45950000 | 1051 | 936  | 45900000 | 0.363145 | 2.57E-06 | 0 |
| chr19 | 45900001 | 46000000 | 1057 | 951  | 45950000 | 0.348421 | 6.02E-06 | 0 |
| chr19 | 45950001 | 46050000 | 1077 | 947  | 4.60E+07 | 0.381545 | 8.54E-07 | 0 |
| chr19 | 46000001 | 46100000 | 1002 | 932  | 46050000 | 0.300444 | 7.79E-05 | 0 |
| chr19 | 46050001 | 46150000 | 977  | 934  | 46100000 | 0.260899 | 0.000504 | 0 |
| chr19 | 46100001 | 46200000 | 963  | 946  | 46150000 | 0.221659 | 0.002585 | 0 |
| chr19 | 46150001 | 46250000 | 915  | 918  | 46200000 | 0.191241 | 0.007892 | 0 |
| chr19 | 46250001 | 46350000 | 1072 | 1046 | 46300000 | 0.231385 | 0.001759 | 0 |
| chr19 | 46300001 | 46400000 | 1050 | 1011 | 46350000 | 0.250569 | 0.000792 | 0 |
| chr19 | 46350001 | 46450000 | 1001 | 986  | 46400000 | 0.217745 | 0.003006 | 0 |
| chr19 | 46400001 | 46500000 | 1033 | 994  | 46450000 | 0.251486 | 0.000761 | 0 |
| chr19 | 47150001 | 47250000 | 1140 | 1094 | 47200000 | 0.255384 | 0.000643 | 0 |
| chr19 | 47200001 | 47300000 | 1135 | 1064 | 47250000 | 0.289157 | 0.000136 | 0 |
| chr19 | 47550001 | 47650000 | 936  | 918  | 47600000 | 0.223977 | 0.002361 | 0 |
| chr19 | 47600001 | 47700000 | 950  | 900  | 47650000 | 0.273966 | 0.000279 | 0 |
| chr19 | 47650001 | 47750000 | 943  | 939  | 47700000 | 0.202096 | 0.005379 | 0 |
| chr19 | 47700001 | 47800000 | 931  | 922  | 47750000 | 0.209977 | 0.00403  | 0 |

|       |          |          |      |      |          |          |          |   |
|-------|----------|----------|------|------|----------|----------|----------|---|
| chr19 | 47800001 | 47900000 | 900  | 887  | 47850000 | 0.216954 | 0.003098 | 0 |
| chr19 | 47850001 | 47950000 | 1006 | 989  | 47900000 | 0.220551 | 0.002698 | 0 |
| chr19 | 47950001 | 48050000 | 1145 | 1130 | 4.80E+07 | 0.214988 | 0.003339 | 0 |
| chr19 | 48000001 | 48100000 | 955  | 958  | 48050000 | 0.191438 | 0.007839 | 0 |
| chr19 | 48200001 | 48300000 | 972  | 942  | 48250000 | 0.241192 | 0.001178 | 0 |
| chr19 | 48800001 | 48900000 | 1090 | 1011 | 48850000 | 0.304508 | 6.35E-05 | 0 |
| chr19 | 48850001 | 48950000 | 1042 | 960  | 48900000 | 0.314212 | 3.86E-05 | 0 |
| chr19 | 48900001 | 49000000 | 1082 | 1035 | 48950000 | 0.260033 | 0.000524 | 0 |
| chr19 | 48950001 | 49050000 | 1040 | 1026 | 4.90E+07 | 0.215516 | 0.003273 | 0 |
| chr19 | 49050001 | 49150000 | 1003 | 1010 | 49100000 | 0.185929 | 0.009463 | 0 |
| chr19 | 49450001 | 49550000 | 790  | 777  | 49500000 | 0.219901 | 0.002767 | 0 |
| chr19 | 49500001 | 49600000 | 744  | 728  | 49550000 | 0.227327 | 0.002069 | 0 |
| chr19 | 49900001 | 50000000 | 1091 | 1095 | 49950000 | 0.190683 | 0.008046 | 0 |
| chr19 | 49950001 | 50050000 | 971  | 893  | 5.00E+07 | 0.316774 | 3.38E-05 | 0 |
| chr19 | 50000001 | 50100000 | 959  | 931  | 50050000 | 0.238713 | 0.001305 | 0 |
| chr19 | 50050001 | 50150000 | 983  | 972  | 50100000 | 0.212198 | 0.003709 | 0 |
| chr19 | 50100001 | 50200000 | 1088 | 1048 | 50150000 | 0.250003 | 0.000811 | 0 |
| chr19 | 50300001 | 50400000 | 1227 | 1163 | 50350000 | 0.273247 | 0.000288 | 0 |
| chr19 | 50350001 | 50450000 | 1170 | 1088 | 50400000 | 0.300793 | 7.65E-05 | 0 |
| chr19 | 50400001 | 50500000 | 1027 | 970  | 50450000 | 0.278343 | 0.000227 | 0 |
| chr19 | 50450001 | 50550000 | 1068 | 1027 | 50500000 | 0.252439 | 0.000731 | 0 |
| chr19 | 50500001 | 50600000 | 844  | 847  | 50550000 | 0.190844 | 0.008001 | 0 |
| chr19 | 50550001 | 50650000 | 378  | 336  | 50600000 | 0.365888 | 2.19E-06 | 0 |
| chr19 | 50600001 | 50700000 | 548  | 516  | 50650000 | 0.282768 | 0.000184 | 0 |
| chr19 | 50800001 | 50900000 | 985  | 972  | 50850000 | 0.21513  | 0.003321 | 0 |
| chr19 | 50950001 | 51050000 | 1127 | 1062 | 5.10E+07 | 0.281667 | 0.000194 | 0 |
| chr19 | 51000001 | 51100000 | 1005 | 965  | 51050000 | 0.254558 | 0.000666 | 0 |
| chr19 | 51050001 | 51150000 | 851  | 840  | 51100000 | 0.214733 | 0.003371 | 0 |
| chr19 | 51100001 | 51200000 | 919  | 897  | 51150000 | 0.23092  | 0.001793 | 0 |
| chr19 | 51250001 | 51350000 | 928  | 881  | 51300000 | 0.270946 | 0.00032  | 0 |
| chr19 | 51300001 | 51400000 | 1057 | 1031 | 51350000 | 0.231894 | 0.001724 | 0 |
| chr19 | 51350001 | 51450000 | 983  | 950  | 51400000 | 0.245227 | 0.000994 | 0 |
| chr19 | 51850001 | 51950000 | 909  | 909  | 51900000 | 0.195963 | 0.006694 | 0 |
| chr19 | 53150001 | 53250000 | 436  | 419  | 53200000 | 0.253341 | 0.000703 | 0 |
| chr19 | 53200001 | 53300000 | 345  | 332  | 53250000 | 0.251376 | 0.000765 | 0 |
| chr19 | 53250001 | 53350000 | 356  | 317  | 53300000 | 0.363357 | 2.54E-06 | 0 |
| chr19 | 53300001 | 53400000 | 394  | 382  | 53350000 | 0.240586 | 0.001208 | 0 |
| chr19 | 53800001 | 53900000 | 428  | 431  | 53850000 | 0.185886 | 0.009477 | 0 |
| chr19 | 54350001 | 54450000 | 607  | 610  | 54400000 | 0.18885  | 0.008568 | 0 |
| chr19 | 54400001 | 54500000 | 635  | 637  | 54450000 | 0.191426 | 0.007842 | 0 |
| chr19 | 54600001 | 54700000 | 744  | 702  | 54650000 | 0.279795 | 0.000212 | 0 |
| chr19 | 54650001 | 54750000 | 622  | 557  | 54700000 | 0.3552   | 4.08E-06 | 0 |
| chr19 | 54700001 | 54800000 | 524  | 511  | 54750000 | 0.232207 | 0.001702 | 0 |
| chr19 | 54900001 | 55000000 | 635  | 638  | 54950000 | 0.189163 | 0.008477 | 0 |
| chr19 | 55500001 | 55600000 | 616  | 599  | 55550000 | 0.236337 | 0.001439 | 0 |
| chr19 | 55550001 | 55650000 | 718  | 642  | 55600000 | 0.357374 | 3.60E-06 | 0 |
| chr19 | 55600001 | 55700000 | 711  | 672  | 55650000 | 0.277351 | 0.000238 | 0 |

|       |          |          |      |      |          |          |          |   |
|-------|----------|----------|------|------|----------|----------|----------|---|
| chr19 | 55650001 | 55750000 | 711  | 694  | 55700000 | 0.230877 | 0.001796 | 0 |
| chr19 | 55700001 | 55800000 | 783  | 751  | 55750000 | 0.256162 | 0.000621 | 0 |
| chr19 | 55750001 | 55850000 | 751  | 724  | 55800000 | 0.248786 | 0.000855 | 0 |
| chr19 | 55950001 | 56050000 | 825  | 805  | 5.60E+07 | 0.231368 | 0.00176  | 0 |
| chr19 | 56050001 | 56150000 | 741  | 747  | 56100000 | 0.184328 | 0.009987 | 0 |
| chr19 | 56100001 | 56200000 | 802  | 800  | 56150000 | 0.199565 | 0.005891 | 0 |
| chr19 | 56550001 | 56650000 | 645  | 632  | 56600000 | 0.225338 | 0.002238 | 0 |
| chr19 | 56600001 | 56700000 | 672  | 670  | 56650000 | 0.200263 | 0.005746 | 0 |
| chr19 | 57000001 | 57100000 | 473  | 630  | 57050000 | -0.21755 | 0.003294 | 0 |
| chr19 | 57800001 | 57900000 | 656  | 648  | 57850000 | 0.213665 | 0.00351  | 0 |
| chr19 | 57850001 | 57950000 | 645  | 641  | 57900000 | 0.204938 | 0.004852 | 0 |
| chr19 | 58150001 | 58250000 | 506  | 682  | 58200000 | -0.23467 | 0.001709 | 0 |
| chr19 | 58300001 | 58400000 | 404  | 401  | 58350000 | 0.206716 | 0.004547 | 0 |
| chr19 | 58600001 | 58700000 | 562  | 559  | 58650000 | 0.203685 | 0.005079 | 0 |
| chr19 | 58800001 | 58900000 | 735  | 703  | 58850000 | 0.260183 | 0.000521 | 0 |
| chr19 | 58850001 | 58950000 | 686  | 639  | 58900000 | 0.298356 | 8.64E-05 | 0 |
| chr19 | 58900001 | 59000000 | 647  | 613  | 58950000 | 0.273842 | 0.00028  | 0 |
| chr19 | 58950001 | 59050000 | 642  | 566  | 5.90E+07 | 0.377734 | 1.08E-06 | 0 |
| chr19 | 59000001 | 59100000 | 669  | 599  | 59050000 | 0.355413 | 4.03E-06 | 0 |
| chr19 | 250001   | 350000   | 863  | 894  | 3.00E+05 | 0.145049 | 0.0335   | 0 |
| chr19 | 600001   | 700000   | 1023 | 1049 | 650000   | 0.159755 | 0.021839 | 0 |
| chr19 | 650001   | 750000   | 1027 | 1061 | 7.00E+05 | 0.148975 | 0.029972 | 0 |
| chr19 | 700001   | 800000   | 1024 | 1050 | 750000   | 0.159789 | 0.021816 | 0 |
| chr19 | 1900001  | 2000000  | 1112 | 1132 | 1950000  | 0.170246 | 0.0158   | 0 |
| chr19 | 2500001  | 2600000  | 923  | 931  | 2550000  | 0.183513 | 0.010264 | 0 |
| chr19 | 2550001  | 2650000  | 990  | 1025 | 2600000  | 0.14584  | 0.032763 | 0 |
| chr19 | 3150001  | 3250000  | 1095 | 1113 | 3200000  | 0.17244  | 0.014737 | 0 |
| chr19 | 3200001  | 3300000  | 1087 | 1105 | 3250000  | 0.172269 | 0.014818 | 0 |
| chr19 | 3850001  | 3950000  | 931  | 943  | 3900000  | 0.177486 | 0.012524 | 0 |
| chr19 | 3900001  | 4000000  | 898  | 932  | 3950000  | 0.142349 | 0.03612  | 0 |
| chr19 | 3950001  | 4050000  | 1025 | 1035 | 4.00E+06 | 0.181956 | 0.01081  | 0 |
| chr19 | 4300001  | 4400000  | 1023 | 1055 | 4350000  | 0.151526 | 0.027849 | 0 |
| chr19 | 4400001  | 4500000  | 991  | 1005 | 4450000  | 0.175724 | 0.013262 | 0 |
| chr19 | 4700001  | 4800000  | 841  | 858  | 4750000  | 0.167091 | 0.017443 | 0 |
| chr19 | 5050001  | 5150000  | 836  | 843  | 5100000  | 0.183933 | 0.01012  | 0 |
| chr19 | 5100001  | 5200000  | 688  | 718  | 5150000  | 0.134388 | 0.044836 | 0 |
| chr19 | 5200001  | 5300000  | 748  | 761  | 5250000  | 0.171105 | 0.015376 | 0 |
| chr19 | 5250001  | 5350000  | 715  | 737  | 5300000  | 0.152242 | 0.027276 | 0 |
| chr19 | 5500001  | 5600000  | 627  | 635  | 5550000  | 0.177672 | 0.012448 | 0 |
| chr19 | 5750001  | 5850000  | 598  | 606  | 5800000  | 0.176791 | 0.012811 | 0 |
| chr19 | 5800001  | 5900000  | 618  | 631  | 5850000  | 0.16593  | 0.018084 | 0 |
| chr19 | 5950001  | 6050000  | 748  | 782  | 6.00E+06 | 0.131833 | 0.047969 | 0 |
| chr19 | 6000001  | 6100000  | 693  | 715  | 6050000  | 0.150875 | 0.028378 | 0 |
| chr19 | 6150001  | 6250000  | 730  | 762  | 6200000  | 0.134069 | 0.045218 | 0 |
| chr19 | 6200001  | 6300000  | 735  | 743  | 6250000  | 0.180345 | 0.011403 | 0 |
| chr19 | 6300001  | 6400000  | 581  | 603  | 6350000  | 0.142343 | 0.036125 | 0 |
| chr19 | 6400001  | 6500000  | 665  | 684  | 6450000  | 0.155321 | 0.024924 | 0 |

|       |          |          |      |      |          |          |          |   |
|-------|----------|----------|------|------|----------|----------|----------|---|
| chr19 | 6700001  | 6800000  | 666  | 692  | 6750000  | 0.140713 | 0.037787 | 0 |
| chr19 | 6750001  | 6850000  | 598  | 613  | 6800000  | 0.160221 | 0.021533 | 0 |
| chr19 | 7000001  | 7100000  | 297  | 301  | 7050000  | 0.176662 | 0.012864 | 0 |
| chr19 | 7600001  | 7700000  | 740  | 763  | 7650000  | 0.151805 | 0.027624 | 0 |
| chr19 | 7900001  | 8000000  | 709  | 726  | 7950000  | 0.161779 | 0.020541 | 0 |
| chr19 | 8050001  | 8150000  | 602  | 628  | 8100000  | 0.134962 | 0.044155 | 0 |
| chr19 | 8250001  | 8350000  | 503  | 512  | 8300000  | 0.170378 | 0.015735 | 0 |
| chr19 | 8550001  | 8650000  | 639  | 649  | 8600000  | 0.17356  | 0.014219 | 0 |
| chr19 | 8600001  | 8700000  | 558  | 572  | 8650000  | 0.160213 | 0.021539 | 0 |
| chr19 | 8850001  | 8950000  | 246  | 313  | 8900000  | -0.15154 | 0.028713 | 0 |
| chr19 | 9150001  | 9250000  | 557  | 577  | 9200000  | 0.145069 | 0.033481 | 0 |
| chr19 | 9250001  | 9350000  | 537  | 546  | 9300000  | 0.171984 | 0.014953 | 0 |
| chr19 | 9650001  | 9750000  | 501  | 517  | 9700000  | 0.150609 | 0.028597 | 0 |
| chr19 | 10100001 | 10200000 | 701  | 728  | 10150000 | 0.141439 | 0.03704  | 0 |
| chr19 | 10200001 | 10300000 | 619  | 645  | 10250000 | 0.136603 | 0.042255 | 0 |
| chr19 | 10550001 | 10650000 | 594  | 619  | 10600000 | 0.136487 | 0.042388 | 0 |
| chr19 | 10600001 | 10700000 | 602  | 611  | 10650000 | 0.174554 | 0.013772 | 0 |
| chr19 | 10800001 | 10900000 | 625  | 647  | 10850000 | 0.146054 | 0.032566 | 0 |
| chr19 | 11000001 | 11100000 | 601  | 629  | 11050000 | 0.130268 | 0.049972 | 0 |
| chr19 | 11850001 | 11950000 | 518  | 542  | 11900000 | 0.130622 | 0.049513 | 0 |
| chr19 | 12000001 | 12100000 | 411  | 424  | 12050000 | 0.151037 | 0.028246 | 0 |
| chr19 | 12050001 | 12150000 | 457  | 473  | 12100000 | 0.146317 | 0.032324 | 0 |
| chr19 | 12400001 | 12500000 | 537  | 561  | 12450000 | 0.132884 | 0.046659 | 0 |
| chr19 | 13150001 | 13250000 | 1563 | 1620 | 13200000 | 0.144287 | 0.034223 | 0 |
| chr19 | 13400001 | 13500000 | 1588 | 1656 | 13450000 | 0.135471 | 0.043559 | 0 |
| chr19 | 14250001 | 14350000 | 951  | 962  | 14300000 | 0.179371 | 0.011774 | 0 |
| chr19 | 14800001 | 14900000 | 1125 | 1152 | 14850000 | 0.161747 | 0.020561 | 0 |
| chr19 | 15200001 | 15300000 | 1412 | 1431 | 15250000 | 0.176679 | 0.012857 | 0 |
| chr19 | 15300001 | 15400000 | 1407 | 1437 | 15350000 | 0.165525 | 0.018312 | 0 |
| chr19 | 15400001 | 15500000 | 1179 | 1205 | 15450000 | 0.164494 | 0.018904 | 0 |
| chr19 | 15500001 | 15600000 | 1454 | 1473 | 15550000 | 0.177233 | 0.012628 | 0 |
| chr19 | 16500001 | 16600000 | 959  | 970  | 16550000 | 0.179509 | 0.011721 | 0 |
| chr19 | 16600001 | 16700000 | 973  | 993  | 16650000 | 0.166609 | 0.017707 | 0 |
| chr19 | 16700001 | 16800000 | 982  | 1010 | 16750000 | 0.155403 | 0.024864 | 0 |
| chr19 | 16850001 | 16950000 | 831  | 861  | 16900000 | 0.144798 | 0.033736 | 0 |
| chr19 | 17100001 | 17200000 | 1665 | 1735 | 17150000 | 0.13655  | 0.042316 | 0 |
| chr19 | 17150001 | 17250000 | 1656 | 1726 | 17200000 | 0.136233 | 0.042678 | 0 |
| chr19 | 17250001 | 17350000 | 1298 | 1353 | 17300000 | 0.136092 | 0.04284  | 0 |
| chr19 | 17800001 | 17900000 | 1221 | 1260 | 17850000 | 0.150603 | 0.028602 | 0 |
| chr19 | 17950001 | 18050000 | 1099 | 1148 | 1.80E+07 | 0.133032 | 0.046478 | 0 |
| chr19 | 18150001 | 18250000 | 1322 | 1351 | 18200000 | 0.164658 | 0.018809 | 0 |
| chr19 | 18600001 | 18700000 | 1297 | 1317 | 18650000 | 0.173886 | 0.014071 | 0 |
| chr19 | 18700001 | 18800000 | 1526 | 1549 | 18750000 | 0.174381 | 0.013849 | 0 |
| chr19 | 18900001 | 19000000 | 719  | 740  | 18950000 | 0.15443  | 0.025587 | 0 |
| chr19 | 19200001 | 19300000 | 661  | 673  | 19250000 | 0.170007 | 0.01592  | 0 |
| chr19 | 19600001 | 19700000 | 761  | 778  | 19650000 | 0.164089 | 0.019141 | 0 |
| chr19 | 19650001 | 19750000 | 662  | 682  | 19700000 | 0.153023 | 0.026663 | 0 |

|       |          |          |      |      |          |          |          |   |
|-------|----------|----------|------|------|----------|----------|----------|---|
| chr19 | 20350001 | 20450000 | 303  | 390  | 20400000 | -0.16819 | 0.017563 | 0 |
| chr19 | 20400001 | 20500000 | 304  | 391  | 20450000 | -0.16713 | 0.01814  | 0 |
| chr19 | 20650001 | 20750000 | 262  | 334  | 20700000 | -0.15432 | 0.026521 | 0 |
| chr19 | 20800001 | 20900000 | 285  | 368  | 20850000 | -0.17278 | 0.015239 | 0 |
| chr19 | 21050001 | 21150000 | 396  | 506  | 21100000 | -0.15767 | 0.024061 | 0 |
| chr19 | 21550001 | 21650000 | 326  | 417  | 21600000 | -0.15921 | 0.022999 | 0 |
| chr19 | 21650001 | 21750000 | 391  | 405  | 21700000 | 0.14521  | 0.033349 | 0 |
| chr19 | 21700001 | 21800000 | 361  | 461  | 21750000 | -0.1568  | 0.024679 | 0 |
| chr19 | 21850001 | 21950000 | 305  | 393  | 21900000 | -0.16976 | 0.016739 | 0 |
| chr19 | 21950001 | 22050000 | 358  | 374  | 2.20E+07 | 0.132884 | 0.046659 | 0 |
| chr19 | 22100001 | 22200000 | 230  | 291  | 22150000 | -0.14342 | 0.036008 | 0 |
| chr19 | 22300001 | 22400000 | 221  | 287  | 22350000 | -0.18104 | 0.01172  | 0 |
| chr19 | 22350001 | 22450000 | 240  | 306  | 22400000 | -0.15453 | 0.026356 | 0 |
| chr19 | 22450001 | 22550000 | 267  | 343  | 22500000 | -0.16541 | 0.019118 | 0 |
| chr19 | 22750001 | 22850000 | 266  | 334  | 22800000 | -0.13246 | 0.048214 | 0 |
| chr19 | 23000001 | 23100000 | 336  | 424  | 23050000 | -0.13964 | 0.039894 | 0 |
| chr19 | 23050001 | 23150000 | 301  | 387  | 23100000 | -0.16661 | 0.018434 | 0 |
| chr19 | 23350001 | 23450000 | 361  | 453  | 23400000 | -0.13155 | 0.049361 | 0 |
| chr19 | 23400001 | 23500000 | 380  | 484  | 23450000 | -0.15304 | 0.027508 | 0 |
| chr19 | 23850001 | 23950000 | 370  | 471  | 23900000 | -0.15224 | 0.028149 | 0 |
| chr19 | 24150001 | 24250000 | 464  | 471  | 24200000 | 0.174361 | 0.013858 | 0 |
| chr19 | 24500001 | 24600000 | 573  | 743  | 24550000 | -0.17886 | 0.012571 | 0 |
| chr19 | 27900001 | 28000000 | 460  | 581  | 27950000 | -0.14094 | 0.03852  | 0 |
| chr19 | 28000001 | 28100000 | 501  | 629  | 28050000 | -0.13229 | 0.04843  | 0 |
| chr19 | 28500001 | 28600000 | 560  | 727  | 28550000 | -0.18057 | 0.011902 | 0 |
| chr19 | 28550001 | 28650000 | 607  | 789  | 28600000 | -0.18237 | 0.011228 | 0 |
| chr19 | 28600001 | 28700000 | 598  | 766  | 28650000 | -0.16124 | 0.021663 | 0 |
| chr19 | 28650001 | 28750000 | 637  | 816  | 28700000 | -0.16131 | 0.021614 | 0 |
| chr19 | 30150001 | 30250000 | 1015 | 1036 | 30200000 | 0.166419 | 0.017812 | 0 |
| chr19 | 31200001 | 31300000 | 780  | 982  | 31250000 | -0.13629 | 0.043621 | 0 |
| chr19 | 31250001 | 31350000 | 744  | 935  | 31300000 | -0.1337  | 0.046683 | 0 |
| chr19 | 31400001 | 31500000 | 683  | 862  | 31450000 | -0.13984 | 0.039681 | 0 |
| chr19 | 31450001 | 31550000 | 697  | 876  | 31500000 | -0.13381 | 0.046551 | 0 |
| chr19 | 31500001 | 31600000 | 680  | 883  | 31550000 | -0.18092 | 0.011768 | 0 |
| chr19 | 31550001 | 31650000 | 692  | 893  | 31600000 | -0.17193 | 0.015651 | 0 |
| chr19 | 31650001 | 31750000 | 789  | 993  | 31700000 | -0.13581 | 0.044177 | 0 |
| chr19 | 32100001 | 32200000 | 692  | 870  | 32150000 | -0.13428 | 0.045981 | 0 |
| chr19 | 32250001 | 32350000 | 713  | 907  | 32300000 | -0.15124 | 0.028962 | 0 |
| chr19 | 32350001 | 32450000 | 658  | 846  | 32400000 | -0.16661 | 0.018434 | 0 |
| chr19 | 32400001 | 32500000 | 676  | 876  | 32450000 | -0.17794 | 0.012946 | 0 |
| chr19 | 32450001 | 32550000 | 775  | 986  | 32500000 | -0.15143 | 0.028805 | 0 |
| chr19 | 32500001 | 32600000 | 743  | 965  | 32550000 | -0.1812  | 0.011659 | 0 |
| chr19 | 32550001 | 32650000 | 715  | 902  | 32600000 | -0.13922 | 0.040344 | 0 |
| chr19 | 33600001 | 33700000 | 592  | 600  | 33650000 | 0.176598 | 0.012891 | 0 |
| chr19 | 33800001 | 33900000 | 703  | 716  | 33850000 | 0.169528 | 0.016162 | 0 |
| chr19 | 33950001 | 34050000 | 707  | 732  | 3.40E+07 | 0.14583  | 0.032772 | 0 |
| chr19 | 34000001 | 34100000 | 667  | 684  | 34050000 | 0.159653 | 0.021905 | 0 |



|       |          |          |      |      |          |          |          |   |
|-------|----------|----------|------|------|----------|----------|----------|---|
| chr19 | 34350001 | 34450000 | 595  | 615  | 34400000 | 0.148266 | 0.030585 | 0 |
| chr19 | 34950001 | 35050000 | 617  | 645  | 3.50E+07 | 0.131934 | 0.047841 | 0 |
| chr19 | 35450001 | 35550000 | 723  | 740  | 35500000 | 0.162433 | 0.020136 | 0 |
| chr19 | 35600001 | 35700000 | 694  | 718  | 35650000 | 0.146915 | 0.031782 | 0 |
| chr19 | 35950001 | 36050000 | 735  | 744  | 3.60E+07 | 0.178405 | 0.012154 | 0 |
| chr19 | 36000001 | 36100000 | 702  | 709  | 36050000 | 0.181648 | 0.010921 | 0 |
| chr19 | 36100001 | 36200000 | 628  | 655  | 36150000 | 0.135233 | 0.043837 | 0 |
| chr19 | 36150001 | 36250000 | 688  | 709  | 36200000 | 0.152586 | 0.027004 | 0 |
| chr19 | 36250001 | 36350000 | 695  | 715  | 36300000 | 0.155033 | 0.025137 | 0 |
| chr19 | 36450001 | 36550000 | 666  | 685  | 36500000 | 0.155381 | 0.02488  | 0 |
| chr19 | 36700001 | 36800000 | 295  | 307  | 36750000 | 0.138439 | 0.040209 | 0 |
| chr19 | 37400001 | 37500000 | 418  | 431  | 37450000 | 0.151778 | 0.027646 | 0 |
| chr19 | 37800001 | 37900000 | 441  | 570  | 37850000 | -0.17422 | 0.014567 | 0 |
| chr19 | 38050001 | 38150000 | 579  | 598  | 38100000 | 0.149381 | 0.029625 | 0 |
| chr19 | 38100001 | 38200000 | 526  | 534  | 38150000 | 0.174186 | 0.013936 | 0 |
| chr19 | 38400001 | 38500000 | 581  | 602  | 38450000 | 0.144738 | 0.033793 | 0 |
| chr19 | 38700001 | 38800000 | 671  | 688  | 38750000 | 0.159867 | 0.021765 | 0 |
| chr19 | 38950001 | 39050000 | 676  | 683  | 3.90E+07 | 0.181101 | 0.011122 | 0 |
| chr19 | 39150001 | 39250000 | 703  | 724  | 39200000 | 0.153498 | 0.026295 | 0 |
| chr19 | 39250001 | 39350000 | 506  | 529  | 39300000 | 0.131833 | 0.047969 | 0 |
| chr19 | 39300001 | 39400000 | 634  | 648  | 39350000 | 0.164452 | 0.018928 | 0 |
| chr19 | 39350001 | 39450000 | 612  | 638  | 39400000 | 0.135938 | 0.043017 | 0 |
| chr19 | 39400001 | 39500000 | 535  | 548  | 39450000 | 0.161326 | 0.020826 | 0 |
| chr19 | 39800001 | 39900000 | 724  | 730  | 39850000 | 0.184056 | 0.010079 | 0 |
| chr19 | 40300001 | 40400000 | 471  | 484  | 40350000 | 0.156683 | 0.02394  | 0 |
| chr19 | 40450001 | 40550000 | 565  | 579  | 40500000 | 0.160651 | 0.021256 | 0 |
| chr19 | 40800001 | 40900000 | 604  | 616  | 40850000 | 0.167581 | 0.017179 | 0 |
| chr19 | 40900001 | 41000000 | 673  | 689  | 40950000 | 0.162066 | 0.020363 | 0 |
| chr19 | 41150001 | 41250000 | 668  | 696  | 41200000 | 0.136724 | 0.042118 | 0 |
| chr19 | 41900001 | 42000000 | 694  | 717  | 41950000 | 0.148926 | 0.030014 | 0 |
| chr19 | 42600001 | 42700000 | 1136 | 1180 | 42650000 | 0.141139 | 0.037347 | 0 |
| chr19 | 42900001 | 43000000 | 928  | 970  | 42950000 | 0.132103 | 0.047629 | 0 |
| chr19 | 43250001 | 43350000 | 177  | 179  | 43300000 | 0.179753 | 0.011628 | 0 |
| chr19 | 43300001 | 43400000 | 198  | 200  | 43350000 | 0.181463 | 0.010989 | 0 |
| chr19 | 43550001 | 43650000 | 215  | 220  | 43600000 | 0.162796 | 0.019914 | 0 |
| chr19 | 44050001 | 44150000 | 1126 | 1171 | 44100000 | 0.139429 | 0.03914  | 0 |
| chr19 | 44150001 | 44250000 | 1002 | 1028 | 44200000 | 0.159005 | 0.022336 | 0 |
| chr19 | 44200001 | 44300000 | 1043 | 1089 | 44250000 | 0.133698 | 0.045665 | 0 |
| chr19 | 44250001 | 44350000 | 1050 | 1064 | 44300000 | 0.176854 | 0.012784 | 0 |
| chr19 | 44650001 | 44750000 | 848  | 880  | 44700000 | 0.142524 | 0.035945 | 0 |
| chr19 | 45550001 | 45650000 | 1145 | 1178 | 45600000 | 0.154971 | 0.025183 | 0 |
| chr19 | 45700001 | 45800000 | 919  | 945  | 45750000 | 0.155714 | 0.024637 | 0 |
| chr19 | 46200001 | 46300000 | 979  | 998  | 46250000 | 0.168232 | 0.016833 | 0 |
| chr19 | 46450001 | 46550000 | 1042 | 1073 | 46500000 | 0.153668 | 0.026165 | 0 |
| chr19 | 46500001 | 46600000 | 998  | 1043 | 46550000 | 0.132336 | 0.047339 | 0 |
| chr19 | 46850001 | 46950000 | 913  | 948  | 46900000 | 0.141691 | 0.036783 | 0 |
| chr19 | 46950001 | 47050000 | 943  | 957  | 4.70E+07 | 0.174702 | 0.013707 | 0 |

|       |          |          |      |      |          |          |          |   |
|-------|----------|----------|------|------|----------|----------|----------|---|
| chr19 | 47350001 | 47450000 | 948  | 985  | 47400000 | 0.140726 | 0.037773 | 0 |
| chr19 | 47450001 | 47550000 | 1070 | 1088 | 47500000 | 0.171895 | 0.014995 | 0 |
| chr19 | 47500001 | 47600000 | 954  | 976  | 47550000 | 0.163071 | 0.019748 | 0 |
| chr19 | 47750001 | 47850000 | 864  | 881  | 47800000 | 0.167852 | 0.017034 | 0 |
| chr19 | 47900001 | 48000000 | 1115 | 1140 | 47950000 | 0.163973 | 0.019209 | 0 |
| chr19 | 48250001 | 48350000 | 883  | 922  | 48300000 | 0.13361  | 0.045772 | 0 |
| chr19 | 48600001 | 48700000 | 988  | 1023 | 48650000 | 0.14574  | 0.032855 | 0 |
| chr19 | 48750001 | 48850000 | 934  | 966  | 48800000 | 0.147362 | 0.031381 | 0 |
| chr19 | 49000001 | 49100000 | 876  | 901  | 49050000 | 0.155367 | 0.024891 | 0 |
| chr19 | 49200001 | 49300000 | 944  | 981  | 49250000 | 0.140497 | 0.038012 | 0 |
| chr19 | 49300001 | 49400000 | 868  | 899  | 49350000 | 0.145337 | 0.03323  | 0 |
| chr19 | 49550001 | 49650000 | 963  | 976  | 49600000 | 0.176618 | 0.012883 | 0 |
| chr19 | 49600001 | 49700000 | 1047 | 1092 | 49650000 | 0.135252 | 0.043815 | 0 |
| chr19 | 50150001 | 50250000 | 995  | 1008 | 50200000 | 0.177236 | 0.012627 | 0 |
| chr19 | 50250001 | 50350000 | 1073 | 1108 | 50300000 | 0.149655 | 0.029393 | 0 |
| chr19 | 50650001 | 50750000 | 940  | 971  | 50700000 | 0.149152 | 0.02982  | 0 |
| chr19 | 50750001 | 50850000 | 989  | 1030 | 50800000 | 0.137361 | 0.041401 | 0 |
| chr19 | 50850001 | 50950000 | 973  | 988  | 50900000 | 0.173892 | 0.014068 | 0 |
| chr19 | 50900001 | 51000000 | 1102 | 1124 | 50950000 | 0.167445 | 0.017252 | 0 |
| chr19 | 51400001 | 51500000 | 912  | 934  | 51450000 | 0.161574 | 0.020669 | 0 |
| chr19 | 51550001 | 51650000 | 997  | 1028 | 51600000 | 0.151788 | 0.027638 | 0 |
| chr19 | 51800001 | 51900000 | 985  | 1013 | 51850000 | 0.155524 | 0.024775 | 0 |
| chr19 | 51900001 | 52000000 | 869  | 904  | 51950000 | 0.138996 | 0.039604 | 0 |
| chr19 | 52000001 | 52100000 | 1095 | 1142 | 52050000 | 0.135331 | 0.043722 | 0 |
| chr19 | 52600001 | 52700000 | 788  | 795  | 52650000 | 0.183204 | 0.01037  | 0 |
| chr19 | 52650001 | 52750000 | 634  | 653  | 52700000 | 0.153363 | 0.026399 | 0 |
| chr19 | 52750001 | 52850000 | 456  | 588  | 52800000 | -0.17082 | 0.016198 | 0 |
| chr19 | 52800001 | 52900000 | 447  | 577  | 52850000 | -0.17233 | 0.015454 | 0 |
| chr19 | 53100001 | 53200000 | 451  | 455  | 53150000 | 0.183224 | 0.010363 | 0 |
| chr19 | 53450001 | 53550000 | 498  | 512  | 53500000 | 0.155965 | 0.024455 | 0 |
| chr19 | 53750001 | 53850000 | 454  | 462  | 53800000 | 0.170762 | 0.015544 | 0 |
| chr19 | 53950001 | 54050000 | 433  | 447  | 5.40E+07 | 0.150055 | 0.029057 | 0 |
| chr19 | 54000001 | 54100000 | 502  | 523  | 54050000 | 0.136839 | 0.041987 | 0 |
| chr19 | 54450001 | 54550000 | 624  | 650  | 54500000 | 0.137069 | 0.041728 | 0 |
| chr19 | 54500001 | 54600000 | 530  | 550  | 54550000 | 0.142524 | 0.035945 | 0 |
| chr19 | 54550001 | 54650000 | 617  | 627  | 54600000 | 0.172768 | 0.014584 | 0 |
| chr19 | 54850001 | 54950000 | 554  | 573  | 54900000 | 0.147314 | 0.031425 | 0 |
| chr19 | 54950001 | 55050000 | 539  | 557  | 5.50E+07 | 0.148571 | 0.03032  | 0 |
| chr19 | 55800001 | 55900000 | 745  | 761  | 55850000 | 0.165307 | 0.018436 | 0 |
| chr19 | 55900001 | 56000000 | 778  | 786  | 55950000 | 0.181204 | 0.011084 | 0 |
| chr19 | 56000001 | 56100000 | 739  | 759  | 56050000 | 0.157438 | 0.023408 | 0 |
| chr19 | 57100001 | 57200000 | 543  | 566  | 57150000 | 0.136113 | 0.042816 | 0 |
| chr19 | 57400001 | 57500000 | 491  | 616  | 57450000 | -0.13124 | 0.04975  | 0 |
| chr19 | 57500001 | 57600000 | 584  | 606  | 57550000 | 0.142614 | 0.035856 | 0 |
| chr19 | 57650001 | 57750000 | 539  | 555  | 57700000 | 0.153761 | 0.026094 | 0 |
| chr19 | 57700001 | 57800000 | 619  | 630  | 57750000 | 0.170551 | 0.015649 | 0 |
| chr19 | 57750001 | 57850000 | 622  | 639  | 57800000 | 0.157062 | 0.023672 | 0 |

|       |          |          |      |      |          |          |          |   |
|-------|----------|----------|------|------|----------|----------|----------|---|
| chr19 | 57950001 | 58050000 | 507  | 651  | 5.80E+07 | -0.16471 | 0.019525 | 0 |
| chr19 | 58000001 | 58100000 | 551  | 695  | 58050000 | -0.139   | 0.040587 | 0 |
| chr19 | 58250001 | 58350000 | 501  | 516  | 58300000 | 0.153403 | 0.026369 | 0 |
| chr19 | 58350001 | 58450000 | 428  | 445  | 58400000 | 0.139768 | 0.038778 | 0 |
| chr19 | 58500001 | 58600000 | 646  | 656  | 58550000 | 0.173801 | 0.014109 | 0 |
| chr19 | 58550001 | 58650000 | 582  | 601  | 58600000 | 0.149617 | 0.029425 | 0 |
| chr19 | 58750001 | 58850000 | 695  | 709  | 58800000 | 0.16719  | 0.01739  | 0 |
| chr19 | 59050001 | 59150000 | 339  | 345  | 59100000 | 0.170652 | 0.015599 | 0 |
| chr19 | 59100001 | 59200000 | 7    | 9    | 59150000 | -0.16661 | 0.018434 | 0 |
| chr2  | 3500001  | 3600000  | 499  | 490  | 3550000  | 0.222221 | 0.002529 | 0 |
| chr2  | 4100001  | 4200000  | 626  | 851  | 4150000  | -0.24703 | 0.001039 | 0 |
| chr2  | 4150001  | 4250000  | 569  | 802  | 4200000  | -0.29921 | 0.000102 | 0 |
| chr2  | 4200001  | 4300000  | 615  | 802  | 4250000  | -0.18705 | 0.009627 | 0 |
| chr2  | 4800001  | 4900000  | 632  | 830  | 4850000  | -0.19722 | 0.006825 | 0 |
| chr2  | 4850001  | 4950000  | 622  | 855  | 4900000  | -0.26305 | 0.000529 | 0 |
| chr2  | 5250001  | 5350000  | 613  | 805  | 5300000  | -0.19714 | 0.006845 | 0 |
| chr2  | 5300001  | 5400000  | 601  | 815  | 5350000  | -0.24347 | 0.001201 | 0 |
| chr2  | 6100001  | 6200000  | 657  | 863  | 6150000  | -0.1975  | 0.00676  | 0 |
| chr2  | 7650001  | 7750000  | 644  | 893  | 7700000  | -0.27564 | 0.000304 | 0 |
| chr2  | 8000001  | 8100000  | 709  | 934  | 8050000  | -0.20167 | 0.005847 | 0 |
| chr2  | 9600001  | 9700000  | 1029 | 984  | 9650000  | 0.260476 | 0.000514 | 0 |
| chr2  | 10400001 | 10500000 | 1245 | 1229 | 10450000 | 0.214624 | 0.003385 | 0 |
| chr2  | 10450001 | 10550000 | 1226 | 1217 | 10500000 | 0.206593 | 0.004567 | 0 |
| chr2  | 10600001 | 10700000 | 1099 | 1085 | 10650000 | 0.214459 | 0.003406 | 0 |
| chr2  | 11000001 | 11100000 | 1067 | 1052 | 11050000 | 0.216389 | 0.003166 | 0 |
| chr2  | 11050001 | 11150000 | 1027 | 1001 | 11100000 | 0.232957 | 0.001651 | 0 |
| chr2  | 11200001 | 11300000 | 983  | 978  | 11250000 | 0.20332  | 0.005146 | 0 |
| chr2  | 12350001 | 12450000 | 667  | 876  | 12400000 | -0.19728 | 0.006812 | 0 |
| chr2  | 13200001 | 13300000 | 652  | 856  | 13250000 | -0.19678 | 0.006932 | 0 |
| chr2  | 13250001 | 13350000 | 588  | 790  | 13300000 | -0.23007 | 0.002046 | 0 |
| chr2  | 13650001 | 13750000 | 587  | 779  | 13700000 | -0.2123  | 0.003997 | 0 |
| chr2  | 13700001 | 13800000 | 596  | 804  | 13750000 | -0.23592 | 0.001627 | 0 |
| chr2  | 13800001 | 13900000 | 547  | 714  | 13850000 | -0.18842 | 0.009199 | 0 |
| chr2  | 13950001 | 14050000 | 582  | 782  | 1.40E+07 | -0.23019 | 0.002037 | 0 |
| chr2  | 14150001 | 14250000 | 530  | 708  | 14200000 | -0.22179 | 0.00281  | 0 |
| chr2  | 14550001 | 14650000 | 581  | 758  | 14600000 | -0.1877  | 0.009423 | 0 |
| chr2  | 16850001 | 16950000 | 639  | 893  | 16900000 | -0.28688 | 0.000182 | 0 |
| chr2  | 17350001 | 17450000 | 654  | 880  | 17400000 | -0.23225 | 0.00188  | 0 |
| chr2  | 17400001 | 17500000 | 673  | 886  | 17450000 | -0.20074 | 0.006042 | 0 |
| chr2  | 18100001 | 18200000 | 488  | 636  | 18150000 | -0.18618 | 0.009908 | 0 |
| chr2  | 18350001 | 18450000 | 632  | 830  | 18400000 | -0.19722 | 0.006825 | 0 |
| chr2  | 19400001 | 19500000 | 713  | 955  | 19450000 | -0.22564 | 0.002428 | 0 |
| chr2  | 20050001 | 20150000 | 951  | 958  | 20100000 | 0.185383 | 0.009639 | 0 |
| chr2  | 20650001 | 20750000 | 1066 | 1057 | 20700000 | 0.208195 | 0.004305 | 0 |
| chr2  | 21700001 | 21800000 | 672  | 888  | 21750000 | -0.20614 | 0.004993 | 0 |
| chr2  | 22300001 | 22400000 | 613  | 827  | 22350000 | -0.23604 | 0.001619 | 0 |
| chr2  | 24250001 | 24350000 | 916  | 889  | 24300000 | 0.239127 | 0.001283 | 0 |

|      |          |          |      |      |          |          |          |   |
|------|----------|----------|------|------|----------|----------|----------|---|
| chr2 | 24500001 | 24600000 | 816  | 817  | 24550000 | 0.194196 | 0.007122 | 0 |
| chr2 | 26900001 | 27000000 | 1123 | 1099 | 26950000 | 0.22713  | 0.002085 | 0 |
| chr2 | 26950001 | 27050000 | 996  | 969  | 2.70E+07 | 0.235612 | 0.001482 | 0 |
| chr2 | 27250001 | 27350000 | 1170 | 1132 | 27300000 | 0.243598 | 0.001065 | 0 |
| chr2 | 27350001 | 27450000 | 1047 | 1042 | 27400000 | 0.202869 | 0.005231 | 0 |
| chr2 | 27400001 | 27500000 | 1115 | 1062 | 27450000 | 0.266223 | 0.000397 | 0 |
| chr2 | 27450001 | 27550000 | 1078 | 1059 | 27500000 | 0.221618 | 0.002589 | 0 |
| chr2 | 27500001 | 27600000 | 997  | 971  | 27550000 | 0.234085 | 0.001577 | 0 |
| chr2 | 27550001 | 27650000 | 940  | 918  | 27600000 | 0.23013  | 0.00185  | 0 |
| chr2 | 27600001 | 27700000 | 988  | 967  | 27650000 | 0.226958 | 0.002099 | 0 |
| chr2 | 28600001 | 28700000 | 1104 | 1099 | 28650000 | 0.202512 | 0.005299 | 0 |
| chr2 | 31800001 | 31900000 | 687  | 902  | 31850000 | -0.19685 | 0.006913 | 0 |
| chr2 | 32500001 | 32600000 | 803  | 719  | 32550000 | 0.355371 | 4.04E-06 | 0 |
| chr2 | 32550001 | 32650000 | 825  | 823  | 32600000 | 0.199465 | 0.005912 | 0 |
| chr2 | 36000001 | 36100000 | 668  | 873  | 36050000 | -0.19017 | 0.008676 | 0 |
| chr2 | 40800001 | 40900000 | 583  | 796  | 40850000 | -0.25331 | 0.0008   | 0 |
| chr2 | 40850001 | 40950000 | 552  | 749  | 40900000 | -0.24433 | 0.00116  | 0 |
| chr2 | 43150001 | 43250000 | 1012 | 1013 | 43200000 | 0.194538 | 0.007037 | 0 |
| chr2 | 44100001 | 44200000 | 981  | 855  | 44150000 | 0.394292 | 3.87E-07 | 0 |
| chr2 | 44150001 | 44250000 | 958  | 866  | 44200000 | 0.341622 | 8.82E-06 | 0 |
| chr2 | 46550001 | 46650000 | 1195 | 1159 | 46600000 | 0.240093 | 0.001233 | 0 |
| chr2 | 47000001 | 47100000 | 1110 | 1082 | 47050000 | 0.232822 | 0.00166  | 0 |
| chr2 | 47050001 | 47150000 | 1111 | 1093 | 47100000 | 0.219528 | 0.002807 | 0 |
| chr2 | 47200001 | 47300000 | 1220 | 1218 | 47250000 | 0.19833  | 0.006156 | 0 |
| chr2 | 47350001 | 47450000 | 994  | 990  | 47400000 | 0.20178  | 0.005441 | 0 |
| chr2 | 49000001 | 49100000 | 704  | 920  | 49050000 | -0.1901  | 0.008698 | 0 |
| chr2 | 49300001 | 49400000 | 614  | 829  | 49350000 | -0.23717 | 0.001548 | 0 |
| chr2 | 49400001 | 49500000 | 575  | 754  | 49450000 | -0.19504 | 0.007357 | 0 |
| chr2 | 49750001 | 49850000 | 590  | 782  | 49800000 | -0.21049 | 0.004269 | 0 |
| chr2 | 50150001 | 50250000 | 607  | 807  | 50200000 | -0.21491 | 0.003632 | 0 |
| chr2 | 50200001 | 50300000 | 629  | 820  | 50250000 | -0.1866  | 0.009772 | 0 |
| chr2 | 50750001 | 50850000 | 640  | 855  | 50800000 | -0.22189 | 0.0028   | 0 |
| chr2 | 51050001 | 51150000 | 650  | 852  | 51100000 | -0.19445 | 0.007507 | 0 |
| chr2 | 51400001 | 51500000 | 626  | 816  | 51450000 | -0.18644 | 0.009823 | 0 |
| chr2 | 52000001 | 52100000 | 558  | 758  | 52050000 | -0.24597 | 0.001085 | 0 |
| chr2 | 52050001 | 52150000 | 544  | 734  | 52100000 | -0.23621 | 0.001608 | 0 |
| chr2 | 52150001 | 52250000 | 630  | 822  | 52200000 | -0.18782 | 0.009384 | 0 |
| chr2 | 52200001 | 52300000 | 546  | 725  | 52250000 | -0.21312 | 0.00388  | 0 |
| chr2 | 52600001 | 52700000 | 624  | 822  | 52650000 | -0.20163 | 0.005856 | 0 |
| chr2 | 52650001 | 52750000 | 640  | 878  | 52700000 | -0.26019 | 0.000598 | 0 |
| chr2 | 52700001 | 52800000 | 640  | 851  | 52750000 | -0.21512 | 0.003604 | 0 |
| chr2 | 52950001 | 53050000 | 671  | 891  | 5.30E+07 | -0.21315 | 0.003875 | 0 |
| chr2 | 53950001 | 54050000 | 865  | 869  | 5.40E+07 | 0.189307 | 0.008435 | 0 |
| chr2 | 55050001 | 55150000 | 861  | 1126 | 55100000 | -0.19116 | 0.008393 | 0 |
| chr2 | 55450001 | 55550000 | 853  | 847  | 55500000 | 0.206147 | 0.004643 | 0 |
| chr2 | 56600001 | 56700000 | 635  | 853  | 56650000 | -0.22983 | 0.002066 | 0 |
| chr2 | 57950001 | 58050000 | 671  | 896  | 5.80E+07 | -0.22122 | 0.002871 | 0 |

|      |          |          |      |      |          |          |          |   |
|------|----------|----------|------|------|----------|----------|----------|---|
| chr2 | 58650001 | 58750000 | 686  | 918  | 58700000 | -0.22432 | 0.002553 | 0 |
| chr2 | 59600001 | 59700000 | 645  | 862  | 59650000 | -0.22243 | 0.002743 | 0 |
| chr2 | 60400001 | 60500000 | 660  | 899  | 60450000 | -0.24989 | 0.000923 | 0 |
| chr2 | 61700001 | 61800000 | 874  | 860  | 61750000 | 0.21926  | 0.002836 | 0 |
| chr2 | 62750001 | 62850000 | 648  | 846  | 62800000 | -0.1887  | 0.009114 | 0 |
| chr2 | 66050001 | 66150000 | 720  | 956  | 66100000 | -0.21305 | 0.003889 | 0 |
| chr2 | 67050001 | 67150000 | 664  | 960  | 67100000 | -0.33589 | 1.61E-05 | 0 |
| chr2 | 67100001 | 67200000 | 699  | 917  | 67150000 | -0.19567 | 0.007201 | 0 |
| chr2 | 67200001 | 67300000 | 685  | 896  | 67250000 | -0.19143 | 0.008316 | 0 |
| chr2 | 67400001 | 67500000 | 691  | 905  | 67450000 | -0.19327 | 0.007815 | 0 |
| chr2 | 67500001 | 67600000 | 671  | 881  | 67550000 | -0.19687 | 0.00691  | 0 |
| chr2 | 68100001 | 68200000 | 725  | 964  | 68150000 | -0.21509 | 0.003608 | 0 |
| chr2 | 69350001 | 69450000 | 1207 | 1175 | 69400000 | 0.234728 | 0.001537 | 0 |
| chr2 | 70400001 | 70500000 | 805  | 807  | 70450000 | 0.192383 | 0.007586 | 0 |
| chr2 | 70450001 | 70550000 | 853  | 843  | 70500000 | 0.212976 | 0.003602 | 0 |
| chr2 | 72600001 | 72700000 | 608  | 794  | 72650000 | -0.1891  | 0.008991 | 0 |
| chr2 | 74100001 | 74200000 | 1004 | 1003 | 74150000 | 0.197401 | 0.006362 | 0 |
| chr2 | 74650001 | 74750000 | 1103 | 1074 | 74700000 | 0.234402 | 0.001557 | 0 |
| chr2 | 74700001 | 74800000 | 1166 | 1145 | 74750000 | 0.222183 | 0.002532 | 0 |
| chr2 | 76250001 | 76350000 | 524  | 703  | 76300000 | -0.22799 | 0.002218 | 0 |
| chr2 | 76350001 | 76450000 | 554  | 737  | 76400000 | -0.21582 | 0.003513 | 0 |
| chr2 | 76400001 | 76500000 | 546  | 724  | 76450000 | -0.21113 | 0.004172 | 0 |
| chr2 | 76450001 | 76550000 | 554  | 761  | 76500000 | -0.26205 | 0.000552 | 0 |
| chr2 | 76500001 | 76600000 | 549  | 751  | 76550000 | -0.25604 | 0.000713 | 0 |
| chr2 | 77300001 | 77400000 | 470  | 655  | 77350000 | -0.28287 | 0.000219 | 0 |
| chr2 | 77750001 | 77850000 | 517  | 679  | 77800000 | -0.19728 | 0.006811 | 0 |
| chr2 | 77800001 | 77900000 | 489  | 669  | 77850000 | -0.25621 | 0.000708 | 0 |
| chr2 | 77850001 | 77950000 | 465  | 612  | 77900000 | -0.20034 | 0.006126 | 0 |
| chr2 | 78350001 | 78450000 | 537  | 704  | 78400000 | -0.19469 | 0.007445 | 0 |
| chr2 | 78700001 | 78800000 | 546  | 733  | 78750000 | -0.22895 | 0.002137 | 0 |
| chr2 | 78750001 | 78850000 | 539  | 821  | 78800000 | -0.41113 | 2.19E-07 | 0 |
| chr2 | 78800001 | 78900000 | 540  | 786  | 78850000 | -0.34561 | 9.62E-06 | 0 |
| chr2 | 79050001 | 79150000 | 589  | 772  | 79100000 | -0.19437 | 0.007527 | 0 |
| chr2 | 79100001 | 79200000 | 588  | 794  | 79150000 | -0.23736 | 0.001536 | 0 |
| chr2 | 79300001 | 79400000 | 564  | 747  | 79350000 | -0.20945 | 0.004433 | 0 |
| chr2 | 79350001 | 79450000 | 600  | 826  | 79400000 | -0.26522 | 0.000481 | 0 |
| chr2 | 79400001 | 79500000 | 617  | 850  | 79450000 | -0.26623 | 0.000461 | 0 |
| chr2 | 79550001 | 79650000 | 576  | 776  | 79600000 | -0.23402 | 0.001753 | 0 |
| chr2 | 79600001 | 79700000 | 552  | 723  | 79650000 | -0.19336 | 0.007789 | 0 |
| chr2 | 79650001 | 79750000 | 604  | 794  | 79700000 | -0.19863 | 0.006502 | 0 |
| chr2 | 79700001 | 79800000 | 634  | 837  | 79750000 | -0.20478 | 0.005239 | 0 |
| chr2 | 79950001 | 80050000 | 599  | 797  | 8.00E+07 | -0.21606 | 0.003481 | 0 |
| chr2 | 80000001 | 80100000 | 605  | 805  | 80050000 | -0.21609 | 0.003477 | 0 |
| chr2 | 80100001 | 80200000 | 606  | 805  | 80150000 | -0.21371 | 0.003796 | 0 |
| chr2 | 80350001 | 80450000 | 570  | 752  | 80400000 | -0.20381 | 0.005423 | 0 |
| chr2 | 80700001 | 80800000 | 603  | 790  | 80750000 | -0.19373 | 0.007693 | 0 |
| chr2 | 80900001 | 81000000 | 536  | 716  | 80950000 | -0.22176 | 0.002813 | 0 |

|      |          |          |      |      |          |          |          |   |
|------|----------|----------|------|------|----------|----------|----------|---|
| chr2 | 81050001 | 81150000 | 582  | 762  | 81100000 | -0.19281 | 0.007938 | 0 |
| chr2 | 81100001 | 81200000 | 561  | 755  | 81150000 | -0.23251 | 0.00186  | 0 |
| chr2 | 81150001 | 81250000 | 576  | 808  | 81200000 | -0.29232 | 0.000141 | 0 |
| chr2 | 81200001 | 81300000 | 564  | 781  | 81250000 | -0.27366 | 0.000332 | 0 |
| chr2 | 81250001 | 81350000 | 549  | 750  | 81300000 | -0.25412 | 0.000774 | 0 |
| chr2 | 82300001 | 82400000 | 569  | 755  | 82350000 | -0.21208 | 0.004029 | 0 |
| chr2 | 82350001 | 82450000 | 547  | 750  | 82400000 | -0.25939 | 0.000619 | 0 |
| chr2 | 82400001 | 82500000 | 528  | 721  | 82450000 | -0.2535  | 0.000794 | 0 |
| chr2 | 82450001 | 82550000 | 527  | 704  | 82500000 | -0.22181 | 0.002808 | 0 |
| chr2 | 82850001 | 82950000 | 587  | 808  | 82900000 | -0.26503 | 0.000485 | 0 |
| chr2 | 82900001 | 83000000 | 572  | 803  | 82950000 | -0.29342 | 0.000134 | 0 |
| chr2 | 82950001 | 83050000 | 565  | 774  | 8.30E+07 | -0.25812 | 0.000653 | 0 |
| chr2 | 83000001 | 83100000 | 573  | 762  | 83050000 | -0.21529 | 0.003581 | 0 |
| chr2 | 83150001 | 83250000 | 581  | 763  | 83200000 | -0.19718 | 0.006835 | 0 |
| chr2 | 83300001 | 83400000 | 557  | 737  | 83350000 | -0.20802 | 0.004666 | 0 |
| chr2 | 83350001 | 83450000 | 574  | 778  | 83400000 | -0.24276 | 0.001237 | 0 |
| chr2 | 83550001 | 83650000 | 534  | 705  | 83600000 | -0.20482 | 0.005232 | 0 |
| chr2 | 84000001 | 84100000 | 568  | 752  | 84050000 | -0.20888 | 0.004525 | 0 |
| chr2 | 84050001 | 84150000 | 578  | 770  | 84100000 | -0.21783 | 0.00326  | 0 |
| chr2 | 84500001 | 84600000 | 658  | 874  | 84550000 | -0.21358 | 0.003814 | 0 |
| chr2 | 85100001 | 85200000 | 966  | 965  | 85150000 | 0.197457 | 0.00635  | 0 |
| chr2 | 85150001 | 85250000 | 927  | 922  | 85200000 | 0.203766 | 0.005064 | 0 |
| chr2 | 85600001 | 85700000 | 1018 | 990  | 85650000 | 0.2362   | 0.001447 | 0 |
| chr2 | 85750001 | 85850000 | 1014 | 988  | 85800000 | 0.233438 | 0.001619 | 0 |
| chr2 | 85900001 | 86000000 | 1197 | 1190 | 85950000 | 0.204425 | 0.004944 | 0 |
| chr2 | 86250001 | 86350000 | 1042 | 1031 | 86300000 | 0.211274 | 0.00384  | 0 |
| chr2 | 87150001 | 87250000 | 4    | 8    | 87200000 | -0.80404 | 3.29E-21 | 0 |
| chr2 | 87250001 | 87350000 | 38   | 32   | 87300000 | 0.443891 | 1.45E-08 | 0 |
| chr2 | 87300001 | 87400000 | 40   | 30   | 87350000 | 0.611001 | 2.44E-14 | 0 |
| chr2 | 87400001 | 87500000 | 26   | 25   | 87450000 | 0.252547 | 0.000727 | 0 |
| chr2 | 87450001 | 87550000 | 33   | 26   | 87500000 | 0.539917 | 1.04E-11 | 0 |
| chr2 | 87650001 | 87750000 | 12   | 17   | 87700000 | -0.30654 | 7.14E-05 | 0 |
| chr2 | 87700001 | 87800000 | 27   | 17   | 87750000 | 0.863388 | 2.22E-25 | 0 |
| chr2 | 87750001 | 87850000 | 28   | 25   | 87800000 | 0.359462 | 3.19E-06 | 0 |
| chr2 | 87800001 | 87900000 | 14   | 26   | 87850000 | -0.69712 | 6.85E-17 | 0 |
| chr2 | 87950001 | 88050000 | 12   | 20   | 8.80E+07 | -0.541   | 2.84E-11 | 0 |
| chr2 | 88000001 | 88100000 | 4    | 9    | 88050000 | -0.97396 | 1.25E-28 | 0 |
| chr2 | 88050001 | 88150000 | 5    | 13   | 88100000 | -1.18255 | 2.87E-38 | 0 |
| chr2 | 88200001 | 88300000 | 47   | 70   | 88250000 | -0.37873 | 1.52E-06 | 0 |
| chr2 | 89350001 | 89450000 | 41   | 62   | 89400000 | -0.40068 | 4.14E-07 | 0 |
| chr2 | 89400001 | 89500000 | 47   | 76   | 89450000 | -0.49738 | 7.02E-10 | 0 |
| chr2 | 89500001 | 89600000 | 44   | 35   | 89550000 | 0.526112 | 3.16E-11 | 0 |
| chr2 | 89550001 | 89650000 | 12   | 12   | 89600000 | 0.195963 | 0.006694 | 0 |
| chr2 | 89900001 | 90000000 | 14   | 12   | 89950000 | 0.418355 | 8.19E-08 | 0 |
| chr2 | 90000001 | 90100000 | 62   | 62   | 90050000 | 0.195963 | 0.006694 | 0 |
| chr2 | 90100001 | 90200000 | 133  | 182  | 90150000 | -0.25655 | 0.000698 | 0 |
| chr2 | 90150001 | 90250000 | 112  | 168  | 90200000 | -0.389   | 8.31E-07 | 0 |

|      |          |          |      |      |          |          |          |   |
|------|----------|----------|------|------|----------|----------|----------|---|
| chr2 | 90200001 | 90300000 | 113  | 167  | 90250000 | -0.36756 | 2.87E-06 | 0 |
| chr2 | 90250001 | 90350000 | 13   | 17   | 90300000 | -0.19106 | 0.008421 | 0 |
| chr2 | 90350001 | 90450000 | 35   | 56   | 90400000 | -0.48211 | 2.06E-09 | 0 |
| chr2 | 91550001 | 91650000 | 21   | 28   | 91600000 | -0.21907 | 0.003112 | 0 |
| chr2 | 91900001 | 92000000 | 134  | 178  | 91950000 | -0.21368 | 0.0038   | 0 |
| chr2 | 91950001 | 92050000 | 73   | 96   | 9.20E+07 | -0.19917 | 0.00638  | 0 |
| chr2 | 92100001 | 92200000 | 68   | 103  | 92150000 | -0.40307 | 3.58E-07 | 0 |
| chr2 | 92150001 | 92250000 | 43   | 66   | 92200000 | -0.42217 | 1.10E-07 | 0 |
| chr2 | 95250001 | 95350000 | 21   | 20   | 95300000 | 0.266352 | 0.000395 | 0 |
| chr2 | 95300001 | 95400000 | 65   | 52   | 95350000 | 0.517891 | 6.05E-11 | 0 |
| chr2 | 95350001 | 95450000 | 231  | 215  | 95400000 | 0.299519 | 8.16E-05 | 0 |
| chr2 | 96050001 | 96150000 | 255  | 239  | 96100000 | 0.28945  | 0.000134 | 0 |
| chr2 | 96550001 | 96650000 | 51   | 71   | 96600000 | -0.28136 | 0.000235 | 0 |
| chr2 | 97700001 | 97800000 | 123  | 164  | 97750000 | -0.21907 | 0.003112 | 0 |
| chr2 | 97900001 | 98000000 | 4    | 1    | 97950000 | 2.195963 | 8.22E-92 | 0 |
| chr2 | 97950001 | 98050000 | 114  | 112  | 9.80E+07 | 0.221498 | 0.002601 | 0 |
| chr2 | 98050001 | 98150000 | 1    | 5    | 98100000 | -2.12597 | 6.56E-79 | 0 |
| chr2 | 98100001 | 98200000 | 38   | 35   | 98150000 | 0.314608 | 3.78E-05 | 0 |
| chr2 | 98300001 | 98400000 | 987  | 982  | 98350000 | 0.20329  | 0.005152 | 0 |
| chr2 | 99750001 | 99850000 | 826  | 791  | 99800000 | 0.258427 | 0.000563 | 0 |
| chr2 | 1.04E+08 | 1.04E+08 | 654  | 853  | 1.04E+08 | -0.18729 | 0.009551 | 0 |
| chr2 | 1.04E+08 | 1.04E+08 | 583  | 760  | 1.04E+08 | -0.18654 | 0.009791 | 0 |
| chr2 | 1.05E+08 | 1.05E+08 | 643  | 863  | 1.05E+08 | -0.22858 | 0.002168 | 0 |
| chr2 | 1.05E+08 | 1.05E+08 | 672  | 881  | 1.05E+08 | -0.19472 | 0.007438 | 0 |
| chr2 | 1.06E+08 | 1.06E+08 | 1065 | 1068 | 1.06E+08 | 0.191905 | 0.007713 | 0 |
| chr2 | 1.06E+08 | 1.07E+08 | 793  | 1037 | 1.07E+08 | -0.19106 | 0.008421 | 0 |
| chr2 | 1.07E+08 | 1.07E+08 | 29   | 16   | 1.07E+08 | 1.053944 | 5.89E-35 | 0 |
| chr2 | 1.08E+08 | 1.08E+08 | 628  | 830  | 1.08E+08 | -0.20638 | 0.004949 | 0 |
| chr2 | 1.08E+08 | 1.09E+08 | 297  | 411  | 1.08E+08 | -0.27271 | 0.000346 | 0 |
| chr2 | 1.09E+08 | 1.09E+08 | 718  | 982  | 1.09E+08 | -0.25578 | 0.000722 | 0 |
| chr2 | 1.09E+08 | 1.09E+08 | 570  | 573  | 1.09E+08 | 0.18839  | 0.008704 | 0 |
| chr2 | 1.09E+08 | 1.09E+08 | 873  | 874  | 1.09E+08 | 0.194311 | 0.007093 | 0 |
| chr2 | 1.1E+08  | 1.1E+08  | 1096 | 1066 | 1.1E+08  | 0.236003 | 0.001459 | 0 |
| chr2 | 1.1E+08  | 1.1E+08  | 1066 | 1054 | 1.1E+08  | 0.212296 | 0.003696 | 0 |
| chr2 | 1.1E+08  | 1.1E+08  | 78   | 102  | 1.1E+08  | -0.19106 | 0.008421 | 0 |
| chr2 | 1.1E+08  | 1.1E+08  | 814  | 818  | 1.1E+08  | 0.188891 | 0.008556 | 0 |
| chr2 | 1.11E+08 | 1.11E+08 | 3    | 6    | 1.11E+08 | -0.80404 | 3.29E-21 | 0 |
| chr2 | 1.11E+08 | 1.11E+08 | 4    | 6    | 1.11E+08 | -0.389   | 8.31E-07 | 0 |
| chr2 | 1.11E+08 | 1.11E+08 | 8    | 7    | 1.11E+08 | 0.388608 | 5.52E-07 | 0 |
| chr2 | 1.11E+08 | 1.11E+08 | 6    | 4    | 1.11E+08 | 0.780926 | 1.60E-21 | 0 |
| chr2 | 1.11E+08 | 1.11E+08 | 396  | 398  | 1.11E+08 | 0.188695 | 0.008614 | 0 |
| chr2 | 1.11E+08 | 1.11E+08 | 869  | 859  | 1.11E+08 | 0.212661 | 0.003645 | 0 |
| chr2 | 1.11E+08 | 1.11E+08 | 782  | 754  | 1.11E+08 | 0.248567 | 0.000863 | 0 |
| chr2 | 1.11E+08 | 1.11E+08 | 309  | 292  | 1.11E+08 | 0.277602 | 0.000235 | 0 |
| chr2 | 1.11E+08 | 1.11E+08 | 7    | 11   | 1.11E+08 | -0.45611 | 1.21E-08 | 0 |
| chr2 | 1.11E+08 | 1.11E+08 | 8    | 12   | 1.11E+08 | -0.389   | 8.31E-07 | 0 |
| chr2 | 1.11E+08 | 1.11E+08 | 3    | 5    | 1.11E+08 | -0.541   | 2.84E-11 | 0 |

|      |          |          |      |      |          |          |           |   |
|------|----------|----------|------|------|----------|----------|-----------|---|
| chr2 | 1.11E+08 | 1.11E+08 | 0    | 2    | 1.11E+08 | #NAME?   | 3.67E-137 | 0 |
| chr2 | 1.11E+08 | 1.11E+08 | 74   | 72   | 1.11E+08 | 0.235491 | 0.00149   | 0 |
| chr2 | 1.12E+08 | 1.12E+08 | 27   | 21   | 1.12E+08 | 0.558533 | 2.25E-12  | 0 |
| chr2 | 1.12E+08 | 1.12E+08 | 37   | 31   | 1.12E+08 | 0.45122  | 8.70E-09  | 0 |
| chr2 | 1.12E+08 | 1.12E+08 | 37   | 34   | 1.12E+08 | 0.317954 | 3.18E-05  | 0 |
| chr2 | 1.13E+08 | 1.13E+08 | 852  | 837  | 1.13E+08 | 0.221589 | 0.002592  | 0 |
| chr2 | 1.13E+08 | 1.13E+08 | 954  | 950  | 1.13E+08 | 0.202025 | 0.005393  | 0 |
| chr2 | 1.14E+08 | 1.14E+08 | 1049 | 1003 | 1.14E+08 | 0.260656 | 0.00051   | 0 |
| chr2 | 1.14E+08 | 1.14E+08 | 31   | 29   | 1.14E+08 | 0.292178 | 0.000117  | 0 |
| chr2 | 1.14E+08 | 1.14E+08 | 43   | 39   | 1.14E+08 | 0.336826 | 1.15E-05  | 0 |
| chr2 | 1.15E+08 | 1.15E+08 | 691  | 909  | 1.15E+08 | -0.19963 | 0.006279  | 0 |
| chr2 | 1.15E+08 | 1.16E+08 | 634  | 833  | 1.16E+08 | -0.19787 | 0.006675  | 0 |
| chr2 | 1.16E+08 | 1.16E+08 | 604  | 791  | 1.16E+08 | -0.19317 | 0.007842  | 0 |
| chr2 | 1.16E+08 | 1.16E+08 | 614  | 801  | 1.16E+08 | -0.1876  | 0.009453  | 0 |
| chr2 | 1.16E+08 | 1.16E+08 | 559  | 794  | 1.16E+08 | -0.31033 | 5.93E-05  | 0 |
| chr2 | 1.16E+08 | 1.16E+08 | 555  | 786  | 1.16E+08 | -0.30608 | 7.31E-05  | 0 |
| chr2 | 1.16E+08 | 1.16E+08 | 568  | 741  | 1.16E+08 | -0.18762 | 0.009447  | 0 |
| chr2 | 1.17E+08 | 1.17E+08 | 571  | 763  | 1.17E+08 | -0.22223 | 0.002764  | 0 |
| chr2 | 1.17E+08 | 1.17E+08 | 515  | 683  | 1.17E+08 | -0.21135 | 0.004138  | 0 |
| chr2 | 1.17E+08 | 1.17E+08 | 580  | 764  | 1.17E+08 | -0.20156 | 0.005871  | 0 |
| chr2 | 1.17E+08 | 1.17E+08 | 604  | 818  | 1.17E+08 | -0.24159 | 0.001297  | 0 |
| chr2 | 1.18E+08 | 1.18E+08 | 582  | 801  | 1.18E+08 | -0.26482 | 0.00049   | 0 |
| chr2 | 1.18E+08 | 1.19E+08 | 651  | 899  | 1.18E+08 | -0.2697  | 0.000396  | 0 |
| chr2 | 1.18E+08 | 1.19E+08 | 617  | 822  | 1.19E+08 | -0.2179  | 0.003251  | 0 |
| chr2 | 1.19E+08 | 1.19E+08 | 645  | 850  | 1.19E+08 | -0.2022  | 0.005739  | 0 |
| chr2 | 1.21E+08 | 1.21E+08 | 717  | 937  | 1.21E+08 | -0.19011 | 0.008693  | 0 |
| chr2 | 1.23E+08 | 1.23E+08 | 624  | 817  | 1.23E+08 | -0.19283 | 0.007933  | 0 |
| chr2 | 1.23E+08 | 1.23E+08 | 631  | 839  | 1.23E+08 | -0.21507 | 0.003611  | 0 |
| chr2 | 1.24E+08 | 1.24E+08 | 649  | 847  | 1.24E+08 | -0.18818 | 0.009273  | 0 |
| chr2 | 1.24E+08 | 1.24E+08 | 549  | 747  | 1.24E+08 | -0.24834 | 0.000984  | 0 |
| chr2 | 1.24E+08 | 1.25E+08 | 591  | 810  | 1.24E+08 | -0.2588  | 0.000635  | 0 |
| chr2 | 1.25E+08 | 1.25E+08 | 565  | 749  | 1.25E+08 | -0.21075 | 0.004229  | 0 |
| chr2 | 1.25E+08 | 1.25E+08 | 596  | 799  | 1.25E+08 | -0.22692 | 0.002311  | 0 |
| chr2 | 1.25E+08 | 1.25E+08 | 595  | 780  | 1.25E+08 | -0.19462 | 0.007463  | 0 |
| chr2 | 1.25E+08 | 1.26E+08 | 632  | 840  | 1.25E+08 | -0.2145  | 0.003687  | 0 |
| chr2 | 1.26E+08 | 1.26E+08 | 647  | 880  | 1.26E+08 | -0.24777 | 0.001007  | 0 |
| chr2 | 1.27E+08 | 1.27E+08 | 552  | 722  | 1.27E+08 | -0.19137 | 0.008334  | 0 |
| chr2 | 1.28E+08 | 1.28E+08 | 1098 | 1104 | 1.28E+08 | 0.188101 | 0.00879   | 0 |
| chr2 | 1.28E+08 | 1.28E+08 | 1202 | 1163 | 1.28E+08 | 0.243549 | 0.001067  | 0 |
| chr2 | 1.28E+08 | 1.28E+08 | 950  | 947  | 1.28E+08 | 0.200526 | 0.005692  | 0 |
| chr2 | 1.28E+08 | 1.29E+08 | 1142 | 1142 | 1.28E+08 | 0.195963 | 0.006694  | 0 |
| chr2 | 1.3E+08  | 1.3E+08  | 633  | 831  | 1.3E+08  | -0.19668 | 0.006954  | 0 |
| chr2 | 1.3E+08  | 1.3E+08  | 633  | 840  | 1.3E+08  | -0.21222 | 0.004009  | 0 |
| chr2 | 1.31E+08 | 1.31E+08 | 210  | 208  | 1.31E+08 | 0.209769 | 0.004062  | 0 |
| chr2 | 1.31E+08 | 1.31E+08 | 776  | 765  | 1.31E+08 | 0.21656  | 0.003145  | 0 |
| chr2 | 1.31E+08 | 1.31E+08 | 1051 | 1035 | 1.31E+08 | 0.218095 | 0.002966  | 0 |
| chr2 | 1.31E+08 | 1.31E+08 | 14   | 7    | 1.31E+08 | 1.195963 | 1.84E-42  | 0 |



|      |          |          |      |      |          |          |          |   |
|------|----------|----------|------|------|----------|----------|----------|---|
| chr2 | 1.31E+08 | 1.31E+08 | 17   | 7    | 1.31E+08 | 1.476071 | 1.90E-57 | 0 |
| chr2 | 1.31E+08 | 1.31E+08 | 9    | 9    | 1.31E+08 | 0.195963 | 0.006694 | 0 |
| chr2 | 1.31E+08 | 1.32E+08 | 697  | 701  | 1.32E+08 | 0.187707 | 0.008909 | 0 |
| chr2 | 1.32E+08 | 1.32E+08 | 1074 | 1024 | 1.32E+08 | 0.264741 | 0.000425 | 0 |
| chr2 | 1.32E+08 | 1.32E+08 | 61   | 56   | 1.32E+08 | 0.319345 | 2.95E-05 | 0 |
| chr2 | 1.33E+08 | 1.33E+08 | 80   | 113  | 1.33E+08 | -0.30229 | 8.78E-05 | 0 |
| chr2 | 1.33E+08 | 1.33E+08 | 63   | 91   | 1.33E+08 | -0.33455 | 1.73E-05 | 0 |
| chr2 | 1.33E+08 | 1.33E+08 | 62   | 90   | 1.33E+08 | -0.34169 | 1.19E-05 | 0 |
| chr2 | 1.37E+08 | 1.38E+08 | 687  | 931  | 1.38E+08 | -0.24251 | 0.001249 | 0 |
| chr2 | 1.38E+08 | 1.38E+08 | 573  | 793  | 1.38E+08 | -0.27282 | 0.000345 | 0 |
| chr2 | 1.38E+08 | 1.38E+08 | 555  | 806  | 1.38E+08 | -0.34233 | 1.15E-05 | 0 |
| chr2 | 1.39E+08 | 1.4E+08  | 656  | 882  | 1.39E+08 | -0.23112 | 0.001964 | 0 |
| chr2 | 1.4E+08  | 1.4E+08  | 552  | 794  | 1.4E+08  | -0.32851 | 2.37E-05 | 0 |
| chr2 | 1.4E+08  | 1.4E+08  | 587  | 773  | 1.4E+08  | -0.20114 | 0.005956 | 0 |
| chr2 | 1.4E+08  | 1.4E+08  | 588  | 771  | 1.4E+08  | -0.19495 | 0.007379 | 0 |
| chr2 | 1.4E+08  | 1.4E+08  | 549  | 718  | 1.4E+08  | -0.19121 | 0.008377 | 0 |
| chr2 | 1.41E+08 | 1.41E+08 | 606  | 815  | 1.41E+08 | -0.23152 | 0.001934 | 0 |
| chr2 | 1.41E+08 | 1.41E+08 | 580  | 773  | 1.41E+08 | -0.21845 | 0.003185 | 0 |
| chr2 | 1.41E+08 | 1.41E+08 | 562  | 741  | 1.41E+08 | -0.20294 | 0.005592 | 0 |
| chr2 | 1.42E+08 | 1.42E+08 | 568  | 754  | 1.42E+08 | -0.21271 | 0.003938 | 0 |
| chr2 | 1.42E+08 | 1.42E+08 | 568  | 772  | 1.42E+08 | -0.24675 | 0.001051 | 0 |
| chr2 | 1.42E+08 | 1.42E+08 | 526  | 743  | 1.42E+08 | -0.30234 | 8.76E-05 | 0 |
| chr2 | 1.42E+08 | 1.42E+08 | 561  | 813  | 1.42E+08 | -0.33929 | 1.35E-05 | 0 |
| chr2 | 1.42E+08 | 1.42E+08 | 613  | 835  | 1.42E+08 | -0.24993 | 0.000922 | 0 |
| chr2 | 1.43E+08 | 1.43E+08 | 679  | 886  | 1.43E+08 | -0.18793 | 0.00935  | 0 |
| chr2 | 1.44E+08 | 1.45E+08 | 640  | 896  | 1.44E+08 | -0.28946 | 0.000161 | 0 |
| chr2 | 1.44E+08 | 1.45E+08 | 736  | 962  | 1.45E+08 | -0.19037 | 0.008619 | 0 |
| chr2 | 1.45E+08 | 1.45E+08 | 704  | 923  | 1.45E+08 | -0.19479 | 0.00742  | 0 |
| chr2 | 1.45E+08 | 1.45E+08 | 711  | 958  | 1.45E+08 | -0.23421 | 0.00174  | 0 |
| chr2 | 1.46E+08 | 1.46E+08 | 649  | 861  | 1.46E+08 | -0.21183 | 0.004066 | 0 |
| chr2 | 1.46E+08 | 1.46E+08 | 627  | 891  | 1.46E+08 | -0.311   | 5.74E-05 | 0 |
| chr2 | 1.46E+08 | 1.46E+08 | 592  | 853  | 1.46E+08 | -0.33099 | 2.08E-05 | 0 |
| chr2 | 1.46E+08 | 1.46E+08 | 574  | 772  | 1.46E+08 | -0.23159 | 0.001929 | 0 |
| chr2 | 1.46E+08 | 1.46E+08 | 608  | 808  | 1.46E+08 | -0.21432 | 0.003712 | 0 |
| chr2 | 1.47E+08 | 1.47E+08 | 599  | 797  | 1.47E+08 | -0.21606 | 0.003481 | 0 |
| chr2 | 1.47E+08 | 1.47E+08 | 642  | 841  | 1.47E+08 | -0.19357 | 0.007735 | 0 |
| chr2 | 1.47E+08 | 1.47E+08 | 609  | 799  | 1.47E+08 | -0.19579 | 0.00717  | 0 |
| chr2 | 1.47E+08 | 1.47E+08 | 555  | 725  | 1.47E+08 | -0.18953 | 0.008864 | 0 |
| chr2 | 1.47E+08 | 1.47E+08 | 553  | 726  | 1.47E+08 | -0.19673 | 0.006943 | 0 |
| chr2 | 1.47E+08 | 1.47E+08 | 562  | 760  | 1.47E+08 | -0.23947 | 0.001412 | 0 |
| chr2 | 1.47E+08 | 1.47E+08 | 612  | 807  | 1.47E+08 | -0.20307 | 0.005566 | 0 |
| chr2 | 1.47E+08 | 1.48E+08 | 571  | 770  | 1.47E+08 | -0.2354  | 0.00166  | 0 |
| chr2 | 1.47E+08 | 1.48E+08 | 588  | 768  | 1.48E+08 | -0.18933 | 0.008925 | 0 |
| chr2 | 1.48E+08 | 1.48E+08 | 524  | 739  | 1.48E+08 | -0.30004 | 9.78E-05 | 0 |
| chr2 | 1.48E+08 | 1.48E+08 | 546  | 763  | 1.48E+08 | -0.28682 | 0.000183 | 0 |
| chr2 | 1.48E+08 | 1.48E+08 | 551  | 738  | 1.48E+08 | -0.22561 | 0.002431 | 0 |
| chr2 | 1.48E+08 | 1.48E+08 | 602  | 837  | 1.48E+08 | -0.2795  | 0.000255 | 0 |

|      |          |          |     |      |          |          |          |   |
|------|----------|----------|-----|------|----------|----------|----------|---|
| chr2 | 1.48E+08 | 1.48E+08 | 573 | 779  | 1.48E+08 | -0.24713 | 0.001035 | 0 |
| chr2 | 1.48E+08 | 1.49E+08 | 591 | 775  | 1.49E+08 | -0.19508 | 0.007348 | 0 |
| chr2 | 1.49E+08 | 1.49E+08 | 517 | 681  | 1.49E+08 | -0.20153 | 0.005877 | 0 |
| chr2 | 1.49E+08 | 1.49E+08 | 611 | 806  | 1.49E+08 | -0.20364 | 0.005455 | 0 |
| chr2 | 1.5E+08  | 1.5E+08  | 728 | 975  | 1.5E+08  | -0.2255  | 0.002441 | 0 |
| chr2 | 1.5E+08  | 1.5E+08  | 720 | 1030 | 1.50E+08 | -0.32061 | 3.55E-05 | 0 |
| chr2 | 1.51E+08 | 1.51E+08 | 709 | 930  | 1.51E+08 | -0.19548 | 0.007247 | 0 |
| chr2 | 1.52E+08 | 1.52E+08 | 596 | 801  | 1.52E+08 | -0.23053 | 0.00201  | 0 |
| chr2 | 1.52E+08 | 1.52E+08 | 682 | 918  | 1.52E+08 | -0.23276 | 0.001842 | 0 |
| chr2 | 1.52E+08 | 1.52E+08 | 665 | 931  | 1.52E+08 | -0.28946 | 0.000161 | 0 |
| chr2 | 1.52E+08 | 1.52E+08 | 789 | 782  | 1.52E+08 | 0.20882  | 0.004207 | 0 |
| chr2 | 1.52E+08 | 1.53E+08 | 574 | 754  | 1.53E+08 | -0.19755 | 0.006749 | 0 |
| chr2 | 1.54E+08 | 1.54E+08 | 651 | 850  | 1.54E+08 | -0.18884 | 0.009071 | 0 |
| chr2 | 1.54E+08 | 1.55E+08 | 599 | 801  | 1.54E+08 | -0.22328 | 0.002656 | 0 |
| chr2 | 1.54E+08 | 1.55E+08 | 579 | 758  | 1.55E+08 | -0.19267 | 0.007975 | 0 |
| chr2 | 1.55E+08 | 1.55E+08 | 647 | 844  | 1.55E+08 | -0.18751 | 0.009481 | 0 |
| chr2 | 1.55E+08 | 1.55E+08 | 625 | 832  | 1.55E+08 | -0.21676 | 0.003392 | 0 |
| chr2 | 1.55E+08 | 1.55E+08 | 616 | 841  | 1.55E+08 | -0.25321 | 0.000804 | 0 |
| chr2 | 1.56E+08 | 1.56E+08 | 632 | 842  | 1.56E+08 | -0.21793 | 0.003248 | 0 |
| chr2 | 1.56E+08 | 1.56E+08 | 548 | 735  | 1.56E+08 | -0.22761 | 0.002251 | 0 |
| chr2 | 1.58E+08 | 1.58E+08 | 579 | 776  | 1.58E+08 | -0.22653 | 0.002346 | 0 |
| chr2 | 1.59E+08 | 1.59E+08 | 596 | 784  | 1.59E+08 | -0.19958 | 0.006291 | 0 |
| chr2 | 1.59E+08 | 1.59E+08 | 702 | 923  | 1.59E+08 | -0.1989  | 0.006442 | 0 |
| chr2 | 1.62E+08 | 1.62E+08 | 656 | 876  | 1.62E+08 | -0.22127 | 0.002866 | 0 |
| chr2 | 1.65E+08 | 1.65E+08 | 696 | 919  | 1.65E+08 | -0.20501 | 0.005196 | 0 |
| chr2 | 1.68E+08 | 1.68E+08 | 498 | 691  | 1.68E+08 | -0.27658 | 0.000291 | 0 |
| chr2 | 1.68E+08 | 1.68E+08 | 544 | 745  | 1.68E+08 | -0.25767 | 0.000666 | 0 |
| chr2 | 1.68E+08 | 1.68E+08 | 615 | 807  | 1.68E+08 | -0.19602 | 0.007114 | 0 |
| chr2 | 1.69E+08 | 1.69E+08 | 630 | 852  | 1.69E+08 | -0.23954 | 0.001408 | 0 |
| chr2 | 1.69E+08 | 1.69E+08 | 550 | 721  | 1.69E+08 | -0.1946  | 0.007467 | 0 |
| chr2 | 1.69E+08 | 1.69E+08 | 612 | 800  | 1.69E+08 | -0.19051 | 0.008579 | 0 |
| chr2 | 1.7E+08  | 1.7E+08  | 836 | 821  | 1.7E+08  | 0.222084 | 0.002542 | 0 |
| chr2 | 1.73E+08 | 1.73E+08 | 858 | 837  | 1.73E+08 | 0.231713 | 0.001736 | 0 |
| chr2 | 1.77E+08 | 1.77E+08 | 985 | 974  | 1.77E+08 | 0.212165 | 0.003714 | 0 |
| chr2 | 1.78E+08 | 1.78E+08 | 968 | 914  | 1.78E+08 | 0.278776 | 0.000223 | 0 |
| chr2 | 1.8E+08  | 1.8E+08  | 688 | 908  | 1.8E+08  | -0.20432 | 0.005326 | 0 |
| chr2 | 1.81E+08 | 1.81E+08 | 653 | 879  | 1.81E+08 | -0.23282 | 0.001838 | 0 |
| chr2 | 1.85E+08 | 1.85E+08 | 653 | 861  | 1.85E+08 | -0.20297 | 0.005587 | 0 |
| chr2 | 1.85E+08 | 1.85E+08 | 615 | 825  | 1.85E+08 | -0.22784 | 0.00223  | 0 |
| chr2 | 1.85E+08 | 1.85E+08 | 493 | 671  | 1.85E+08 | -0.24876 | 0.000967 | 0 |
| chr2 | 1.87E+08 | 1.87E+08 | 586 | 778  | 1.87E+08 | -0.21291 | 0.00391  | 0 |
| chr2 | 1.87E+08 | 1.87E+08 | 602 | 799  | 1.87E+08 | -0.21247 | 0.003973 | 0 |
| chr2 | 1.88E+08 | 1.88E+08 | 641 | 843  | 1.88E+08 | -0.19925 | 0.006364 | 0 |
| chr2 | 1.94E+08 | 1.94E+08 | 661 | 895  | 1.94E+08 | -0.24127 | 0.001313 | 0 |
| chr2 | 1.97E+08 | 1.97E+08 | 740 | 966  | 1.97E+08 | -0.18853 | 0.009164 | 0 |
| chr2 | 1.97E+08 | 1.97E+08 | 740 | 1004 | 1.97E+08 | -0.2442  | 0.001166 | 0 |
| chr2 | 1.99E+08 | 1.99E+08 | 596 | 845  | 1.99E+08 | -0.30768 | 6.76E-05 | 0 |

|      |          |          |      |      |          |          |          |   |
|------|----------|----------|------|------|----------|----------|----------|---|
| chr2 | 1.99E+08 | 1.99E+08 | 595  | 780  | 1.99E+08 | -0.19462 | 0.007463 | 0 |
| chr2 | 1.99E+08 | 2E+08    | 641  | 843  | 2E+08    | -0.19925 | 0.006364 | 0 |
| chr2 | 2.02E+08 | 2.02E+08 | 990  | 941  | 2.02E+08 | 0.269197 | 0.000347 | 0 |
| chr2 | 2.06E+08 | 2.06E+08 | 639  | 844  | 2.06E+08 | -0.20546 | 0.005114 | 0 |
| chr2 | 2.06E+08 | 2.06E+08 | 594  | 779  | 2.06E+08 | -0.1952  | 0.007317 | 0 |
| chr2 | 2.06E+08 | 2.06E+08 | 589  | 773  | 2.06E+08 | -0.19624 | 0.007061 | 0 |
| chr2 | 2.06E+08 | 2.06E+08 | 631  | 840  | 2.06E+08 | -0.21679 | 0.003389 | 0 |
| chr2 | 2.06E+08 | 2.06E+08 | 566  | 757  | 2.06E+08 | -0.22353 | 0.002631 | 0 |
| chr2 | 2.06E+08 | 2.06E+08 | 599  | 851  | 2.06E+08 | -0.31064 | 5.84E-05 | 0 |
| chr2 | 2.06E+08 | 2.06E+08 | 665  | 870  | 2.06E+08 | -0.1917  | 0.008242 | 0 |
| chr2 | 2.06E+08 | 2.06E+08 | 679  | 916  | 2.06E+08 | -0.23597 | 0.001623 | 0 |
| chr2 | 2.06E+08 | 2.06E+08 | 676  | 888  | 2.06E+08 | -0.19757 | 0.006744 | 0 |
| chr2 | 2.06E+08 | 2.07E+08 | 738  | 984  | 2.06E+08 | -0.21907 | 0.003112 | 0 |
| chr2 | 2.09E+08 | 2.09E+08 | 759  | 994  | 2.09E+08 | -0.19318 | 0.007838 | 0 |
| chr2 | 2.1E+08  | 2.1E+08  | 623  | 853  | 2.1E+08  | -0.25735 | 0.000675 | 0 |
| chr2 | 2.1E+08  | 2.1E+08  | 561  | 736  | 2.1E+08  | -0.19574 | 0.007182 | 0 |
| chr2 | 2.1E+08  | 2.1E+08  | 544  | 776  | 2.1E+08  | -0.31649 | 4.37E-05 | 0 |
| chr2 | 2.11E+08 | 2.11E+08 | 920  | 873  | 2.11E+08 | 0.271615 | 0.000311 | 0 |
| chr2 | 2.11E+08 | 2.11E+08 | 684  | 901  | 2.11E+08 | -0.20157 | 0.005868 | 0 |
| chr2 | 2.14E+08 | 2.14E+08 | 515  | 696  | 2.14E+08 | -0.23855 | 0.001465 | 0 |
| chr2 | 2.15E+08 | 2.15E+08 | 649  | 870  | 2.15E+08 | -0.22683 | 0.002319 | 0 |
| chr2 | 2.15E+08 | 2.16E+08 | 624  | 829  | 2.16E+08 | -0.21386 | 0.003775 | 0 |
| chr2 | 2.16E+08 | 2.16E+08 | 615  | 823  | 2.16E+08 | -0.22434 | 0.002551 | 0 |
| chr2 | 2.16E+08 | 2.16E+08 | 657  | 881  | 2.16E+08 | -0.22729 | 0.002279 | 0 |
| chr2 | 2.16E+08 | 2.16E+08 | 634  | 841  | 2.16E+08 | -0.21166 | 0.004091 | 0 |
| chr2 | 2.19E+08 | 2.19E+08 | 947  | 926  | 2.19E+08 | 0.228315 | 0.001989 | 0 |
| chr2 | 2.19E+08 | 2.19E+08 | 1113 | 1068 | 2.19E+08 | 0.255505 | 0.00064  | 0 |
| chr2 | 2.19E+08 | 2.19E+08 | 1098 | 1070 | 2.19E+08 | 0.23323  | 0.001633 | 0 |
| chr2 | 2.19E+08 | 2.2E+08  | 952  | 944  | 2.19E+08 | 0.208138 | 0.004315 | 0 |
| chr2 | 2.19E+08 | 2.2E+08  | 981  | 970  | 2.2E+08  | 0.212231 | 0.003705 | 0 |
| chr2 | 2.2E+08  | 2.2E+08  | 1124 | 1120 | 2.2E+08  | 0.201106 | 0.005575 | 0 |
| chr2 | 2.2E+08  | 2.2E+08  | 1101 | 1098 | 2.2E+08  | 0.199899 | 0.005821 | 0 |
| chr2 | 2.2E+08  | 2.2E+08  | 687  | 650  | 2.2E+08  | 0.275833 | 0.000256 | 0 |
| chr2 | 2.2E+08  | 2.2E+08  | 933  | 894  | 2.2E+08  | 0.257565 | 0.000584 | 0 |
| chr2 | 2.2E+08  | 2.2E+08  | 899  | 842  | 2.2E+08  | 0.290464 | 0.000127 | 0 |
| chr2 | 2.2E+08  | 2.21E+08 | 809  | 813  | 2.2E+08  | 0.188847 | 0.008569 | 0 |
| chr2 | 2.21E+08 | 2.21E+08 | 490  | 652  | 2.21E+08 | -0.21613 | 0.003473 | 0 |
| chr2 | 2.21E+08 | 2.21E+08 | 508  | 674  | 2.21E+08 | -0.21196 | 0.004047 | 0 |
| chr2 | 2.22E+08 | 2.22E+08 | 436  | 576  | 2.22E+08 | -0.20578 | 0.005057 | 0 |
| chr2 | 2.23E+08 | 2.23E+08 | 441  | 615  | 2.23E+08 | -0.28384 | 0.000209 | 0 |
| chr2 | 2.24E+08 | 2.24E+08 | 547  | 713  | 2.24E+08 | -0.1864  | 0.009838 | 0 |
| chr2 | 2.29E+08 | 2.29E+08 | 425  | 555  | 2.29E+08 | -0.18906 | 0.009004 | 0 |
| chr2 | 2.32E+08 | 2.32E+08 | 637  | 639  | 2.32E+08 | 0.19144  | 0.007838 | 0 |
| chr2 | 2.32E+08 | 2.32E+08 | 721  | 660  | 2.32E+08 | 0.323496 | 2.37E-05 | 0 |
| chr2 | 2.32E+08 | 2.32E+08 | 668  | 666  | 2.32E+08 | 0.200289 | 0.00574  | 0 |
| chr2 | 2.32E+08 | 2.32E+08 | 620  | 622  | 2.32E+08 | 0.191317 | 0.007872 | 0 |
| chr2 | 2.32E+08 | 2.32E+08 | 636  | 619  | 2.32E+08 | 0.23505  | 0.001517 | 0 |

|      |          |          |      |      |          |          |          |   |
|------|----------|----------|------|------|----------|----------|----------|---|
| chr2 | 2.32E+08 | 2.32E+08 | 636  | 628  | 2.32E+08 | 0.214225 | 0.003437 | 0 |
| chr2 | 2.32E+08 | 2.33E+08 | 630  | 633  | 2.32E+08 | 0.189109 | 0.008493 | 0 |
| chr2 | 2.32E+08 | 2.33E+08 | 659  | 620  | 2.33E+08 | 0.283973 | 0.000174 | 0 |
| chr2 | 2.33E+08 | 2.33E+08 | 693  | 625  | 2.33E+08 | 0.344962 | 7.32E-06 | 0 |
| chr2 | 2.33E+08 | 2.33E+08 | 613  | 608  | 2.33E+08 | 0.207779 | 0.004372 | 0 |
| chr2 | 2.33E+08 | 2.33E+08 | 758  | 713  | 2.33E+08 | 0.284259 | 0.000172 | 0 |
| chr2 | 2.33E+08 | 2.33E+08 | 829  | 813  | 2.33E+08 | 0.22408  | 0.002352 | 0 |
| chr2 | 2.36E+08 | 2.36E+08 | 653  | 657  | 2.36E+08 | 0.187153 | 0.009079 | 0 |
| chr2 | 2.37E+08 | 2.37E+08 | 674  | 672  | 2.37E+08 | 0.20025  | 0.005748 | 0 |
| chr2 | 2.37E+08 | 2.37E+08 | 533  | 721  | 2.37E+08 | -0.2399  | 0.001388 | 0 |
| chr2 | 2.39E+08 | 2.39E+08 | 728  | 724  | 2.39E+08 | 0.203912 | 0.005037 | 0 |
| chr2 | 2.39E+08 | 2.39E+08 | 689  | 673  | 2.39E+08 | 0.229861 | 0.00187  | 0 |
| chr2 | 2.39E+08 | 2.39E+08 | 673  | 671  | 2.39E+08 | 0.200257 | 0.005747 | 0 |
| chr2 | 2.39E+08 | 2.39E+08 | 751  | 730  | 2.39E+08 | 0.236879 | 0.001407 | 0 |
| chr2 | 2.39E+08 | 2.39E+08 | 793  | 792  | 2.39E+08 | 0.197783 | 0.006277 | 0 |
| chr2 | 2.39E+08 | 2.39E+08 | 640  | 645  | 2.39E+08 | 0.184736 | 0.009851 | 0 |
| chr2 | 2.4E+08  | 2.4E+08  | 683  | 682  | 2.4E+08  | 0.198077 | 0.006212 | 0 |
| chr2 | 2.4E+08  | 2.4E+08  | 701  | 704  | 2.4E+08  | 0.189802 | 0.008293 | 0 |
| chr2 | 2.4E+08  | 2.4E+08  | 513  | 504  | 2.4E+08  | 0.221498 | 0.002601 | 0 |
| chr2 | 2.4E+08  | 2.4E+08  | 505  | 497  | 2.4E+08  | 0.219001 | 0.002864 | 0 |
| chr2 | 2.4E+08  | 2.4E+08  | 758  | 745  | 2.4E+08  | 0.22092  | 0.00266  | 0 |
| chr2 | 2.41E+08 | 2.41E+08 | 634  | 610  | 2.41E+08 | 0.251637 | 0.000756 | 0 |
| chr2 | 2.41E+08 | 2.41E+08 | 682  | 667  | 2.41E+08 | 0.228048 | 0.002011 | 0 |
| chr2 | 2.41E+08 | 2.41E+08 | 699  | 678  | 2.41E+08 | 0.23997  | 0.001239 | 0 |
| chr2 | 2.41E+08 | 2.41E+08 | 781  | 771  | 2.41E+08 | 0.214555 | 0.003394 | 0 |
| chr2 | 2.41E+08 | 2.42E+08 | 744  | 749  | 2.42E+08 | 0.1863   | 0.009345 | 0 |
| chr2 | 2.42E+08 | 2.42E+08 | 642  | 611  | 2.42E+08 | 0.267364 | 0.000377 | 0 |
| chr2 | 2.42E+08 | 2.42E+08 | 841  | 810  | 2.42E+08 | 0.250147 | 0.000806 | 0 |
| chr2 | 2.42E+08 | 2.42E+08 | 824  | 797  | 2.42E+08 | 0.244028 | 0.001046 | 0 |
| chr2 | 2.42E+08 | 2.42E+08 | 763  | 731  | 2.42E+08 | 0.257775 | 0.000579 | 0 |
| chr2 | 2.42E+08 | 2.42E+08 | 762  | 735  | 2.42E+08 | 0.24801  | 0.000884 | 0 |
| chr2 | 2.42E+08 | 2.42E+08 | 681  | 636  | 2.42E+08 | 0.294591 | 0.000104 | 0 |
| chr2 | 2.42E+08 | 2.42E+08 | 627  | 599  | 2.42E+08 | 0.261872 | 0.000483 | 0 |
| chr2 | 2.43E+08 | 2.43E+08 | 702  | 673  | 2.43E+08 | 0.256828 | 0.000604 | 0 |
| chr2 | 2.43E+08 | 2.43E+08 | 699  | 681  | 2.43E+08 | 0.233601 | 0.001609 | 0 |
| chr2 | 2.43E+08 | 2.43E+08 | 1    | 1    | 2.43E+08 | 0.195963 | 0.006694 | 0 |
| chr2 | 2.43E+08 | 2.43E+08 | 1    | 1    | 2.43E+08 | 0.195963 | 0.006694 | 0 |
| chr2 | 650001   | 750000   | 940  | 976  | 7.00E+05 | 0.141743 | 0.03673  | 0 |
| chr2 | 1650001  | 1750000  | 1002 | 1046 | 1700000  | 0.133963 | 0.045346 | 0 |
| chr2 | 3450001  | 3550000  | 819  | 853  | 3500000  | 0.137281 | 0.041491 | 0 |
| chr2 | 4050001  | 4150000  | 707  | 901  | 4100000  | -0.15385 | 0.026877 | 0 |
| chr2 | 4350001  | 4450000  | 638  | 829  | 4400000  | -0.18185 | 0.011416 | 0 |
| chr2 | 4500001  | 4600000  | 662  | 837  | 4550000  | -0.14243 | 0.036992 | 0 |
| chr2 | 5100001  | 5200000  | 502  | 641  | 5150000  | -0.15667 | 0.024773 | 0 |
| chr2 | 5350001  | 5450000  | 625  | 798  | 5400000  | -0.15657 | 0.024848 | 0 |
| chr2 | 5950001  | 6050000  | 630  | 804  | 6.00E+06 | -0.15588 | 0.02535  | 0 |
| chr2 | 6250001  | 6350000  | 588  | 757  | 6300000  | -0.16851 | 0.017391 | 0 |

|      |          |          |      |      |          |          |          |   |
|------|----------|----------|------|------|----------|----------|----------|---|
| chr2 | 6300001  | 6400000  | 609  | 770  | 6350000  | -0.14245 | 0.036972 | 0 |
| chr2 | 6600001  | 6700000  | 662  | 850  | 6650000  | -0.16467 | 0.019548 | 0 |
| chr2 | 6800001  | 6900000  | 688  | 890  | 6850000  | -0.17543 | 0.014021 | 0 |
| chr2 | 7200001  | 7300000  | 733  | 930  | 7250000  | -0.14745 | 0.032214 | 0 |
| chr2 | 7600001  | 7700000  | 659  | 852  | 7650000  | -0.17461 | 0.014389 | 0 |
| chr2 | 9250001  | 9350000  | 987  | 1013 | 9300000  | 0.158451 | 0.022711 | 0 |
| chr2 | 9550001  | 9650000  | 1009 | 1039 | 9600000  | 0.153694 | 0.026145 | 0 |
| chr2 | 9650001  | 9750000  | 879  | 889  | 9700000  | 0.179643 | 0.01167  | 0 |
| chr2 | 9750001  | 9850000  | 1035 | 1049 | 9800000  | 0.176579 | 0.012899 | 0 |
| chr2 | 9800001  | 9900000  | 1036 | 1083 | 9850000  | 0.131954 | 0.047817 | 0 |
| chr2 | 10250001 | 10350000 | 979  | 991  | 10300000 | 0.178387 | 0.012161 | 0 |
| chr2 | 10300001 | 10400000 | 1091 | 1102 | 10350000 | 0.18149  | 0.010979 | 0 |
| chr2 | 10350001 | 10450000 | 1178 | 1214 | 10400000 | 0.152534 | 0.027045 | 0 |
| chr2 | 10550001 | 10650000 | 1141 | 1184 | 10600000 | 0.142593 | 0.035876 | 0 |
| chr2 | 10650001 | 10750000 | 1018 | 1039 | 10700000 | 0.166505 | 0.017764 | 0 |
| chr2 | 10900001 | 11000000 | 1006 | 1039 | 10950000 | 0.149398 | 0.029611 | 0 |
| chr2 | 10950001 | 11050000 | 1007 | 1040 | 1.10E+07 | 0.149443 | 0.029572 | 0 |
| chr2 | 11650001 | 11750000 | 1025 | 1072 | 11700000 | 0.131282 | 0.048666 | 0 |
| chr2 | 12100001 | 12200000 | 784  | 1011 | 12150000 | -0.17089 | 0.01616  | 0 |
| chr2 | 12400001 | 12500000 | 745  | 960  | 12450000 | -0.16983 | 0.0167   | 0 |
| chr2 | 12650001 | 12750000 | 626  | 802  | 12700000 | -0.16148 | 0.021509 | 0 |
| chr2 | 12700001 | 12800000 | 619  | 779  | 12750000 | -0.13572 | 0.044276 | 0 |
| chr2 | 13350001 | 13450000 | 596  | 751  | 13400000 | -0.13754 | 0.042198 | 0 |
| chr2 | 13400001 | 13500000 | 620  | 778  | 13450000 | -0.13154 | 0.049374 | 0 |
| chr2 | 13750001 | 13850000 | 593  | 770  | 13800000 | -0.18086 | 0.011788 | 0 |
| chr2 | 14000001 | 14100000 | 593  | 759  | 14050000 | -0.1601  | 0.022402 | 0 |
| chr2 | 14200001 | 14300000 | 564  | 726  | 14250000 | -0.16831 | 0.017499 | 0 |
| chr2 | 14350001 | 14450000 | 633  | 806  | 14400000 | -0.15261 | 0.027851 | 0 |
| chr2 | 14400001 | 14500000 | 604  | 764  | 14450000 | -0.14306 | 0.036365 | 0 |
| chr2 | 14600001 | 14700000 | 593  | 764  | 14650000 | -0.16958 | 0.016831 | 0 |
| chr2 | 14750001 | 14850000 | 679  | 861  | 14800000 | -0.14664 | 0.032953 | 0 |
| chr2 | 14800001 | 14900000 | 699  | 895  | 14850000 | -0.16063 | 0.022055 | 0 |
| chr2 | 15050001 | 15150000 | 712  | 912  | 15100000 | -0.16119 | 0.021691 | 0 |
| chr2 | 15100001 | 15200000 | 718  | 909  | 15150000 | -0.14433 | 0.035119 | 0 |
| chr2 | 16100001 | 16200000 | 761  | 965  | 16150000 | -0.14667 | 0.032925 | 0 |
| chr2 | 16900001 | 17000000 | 633  | 820  | 16950000 | -0.17746 | 0.01315  | 0 |
| chr2 | 17300001 | 17400000 | 626  | 802  | 17350000 | -0.16148 | 0.021509 | 0 |
| chr2 | 17600001 | 17700000 | 597  | 772  | 17650000 | -0.17491 | 0.014256 | 0 |
| chr2 | 17650001 | 17750000 | 683  | 862  | 17700000 | -0.13984 | 0.039681 | 0 |
| chr2 | 17700001 | 17800000 | 722  | 927  | 17750000 | -0.16461 | 0.019584 | 0 |
| chr2 | 18250001 | 18350000 | 626  | 791  | 18300000 | -0.14155 | 0.037888 | 0 |
| chr2 | 18550001 | 18650000 | 699  | 894  | 18600000 | -0.15902 | 0.02313  | 0 |
| chr2 | 19350001 | 19450000 | 682  | 886  | 19400000 | -0.18157 | 0.011521 | 0 |
| chr2 | 19450001 | 19550000 | 699  | 900  | 19500000 | -0.16867 | 0.017308 | 0 |
| chr2 | 20250001 | 20350000 | 1014 | 1053 | 20300000 | 0.141515 | 0.036962 | 0 |
| chr2 | 20600001 | 20700000 | 992  | 1020 | 20650000 | 0.155806 | 0.02457  | 0 |
| chr2 | 21050001 | 21150000 | 847  | 1063 | 21100000 | -0.13174 | 0.049112 | 0 |

|      |          |          |      |      |          |          |          |   |
|------|----------|----------|------|------|----------|----------|----------|---|
| chr2 | 21100001 | 21200000 | 643  | 819  | 21150000 | -0.15308 | 0.027479 | 0 |
| chr2 | 21900001 | 22000000 | 746  | 947  | 21950000 | -0.14823 | 0.031527 | 0 |
| chr2 | 22050001 | 22150000 | 631  | 820  | 22100000 | -0.18202 | 0.011354 | 0 |
| chr2 | 22100001 | 22200000 | 662  | 862  | 22150000 | -0.18489 | 0.010337 | 0 |
| chr2 | 22450001 | 22550000 | 638  | 809  | 22500000 | -0.14662 | 0.03297  | 0 |
| chr2 | 22500001 | 22600000 | 673  | 853  | 22550000 | -0.14598 | 0.033564 | 0 |
| chr2 | 23150001 | 23250000 | 721  | 915  | 23200000 | -0.14781 | 0.031896 | 0 |
| chr2 | 23200001 | 23300000 | 725  | 942  | 23250000 | -0.18178 | 0.011442 | 0 |
| chr2 | 23400001 | 23500000 | 763  | 967  | 23450000 | -0.14587 | 0.033663 | 0 |
| chr2 | 23450001 | 23550000 | 779  | 1000 | 23500000 | -0.16434 | 0.019742 | 0 |
| chr2 | 24000001 | 24100000 | 844  | 863  | 24050000 | 0.163845 | 0.019285 | 0 |
| chr2 | 24100001 | 24200000 | 764  | 772  | 24150000 | 0.180935 | 0.011183 | 0 |
| chr2 | 25250001 | 25350000 | 928  | 958  | 25300000 | 0.150062 | 0.029051 | 0 |
| chr2 | 25850001 | 25950000 | 877  | 898  | 25900000 | 0.161824 | 0.020513 | 0 |
| chr2 | 26700001 | 26800000 | 1196 | 1239 | 26750000 | 0.145004 | 0.033542 | 0 |
| chr2 | 27200001 | 27300000 | 1159 | 1185 | 27250000 | 0.163957 | 0.019219 | 0 |
| chr2 | 27300001 | 27400000 | 1075 | 1089 | 27350000 | 0.177296 | 0.012602 | 0 |
| chr2 | 27650001 | 27750000 | 999  | 1036 | 27700000 | 0.143496 | 0.034987 | 0 |
| chr2 | 27800001 | 27900000 | 972  | 1007 | 27850000 | 0.144928 | 0.033614 | 0 |
| chr2 | 28350001 | 28450000 | 874  | 1126 | 28400000 | -0.16954 | 0.016852 | 0 |
| chr2 | 28550001 | 28650000 | 1139 | 1151 | 28600000 | 0.180843 | 0.011217 | 0 |
| chr2 | 29600001 | 29700000 | 864  | 903  | 29650000 | 0.132268 | 0.047423 | 0 |
| chr2 | 30550001 | 30650000 | 723  | 922  | 30600000 | -0.15481 | 0.026149 | 0 |
| chr2 | 31600001 | 31700000 | 749  | 947  | 31650000 | -0.14244 | 0.03699  | 0 |
| chr2 | 32000001 | 32100000 | 631  | 808  | 32050000 | -0.16075 | 0.021977 | 0 |
| chr2 | 33100001 | 33200000 | 877  | 917  | 33150000 | 0.131618 | 0.04824  | 0 |
| chr2 | 33150001 | 33250000 | 897  | 935  | 33200000 | 0.136105 | 0.042825 | 0 |
| chr2 | 33900001 | 34000000 | 673  | 858  | 33950000 | -0.15441 | 0.026452 | 0 |
| chr2 | 34350001 | 34450000 | 627  | 802  | 34400000 | -0.15917 | 0.023025 | 0 |
| chr2 | 34900001 | 35000000 | 573  | 719  | 34950000 | -0.13149 | 0.049432 | 0 |
| chr2 | 35400001 | 35500000 | 617  | 776  | 35450000 | -0.13482 | 0.045333 | 0 |
| chr2 | 35450001 | 35550000 | 565  | 732  | 35500000 | -0.17763 | 0.013077 | 0 |
| chr2 | 35600001 | 35700000 | 631  | 822  | 35650000 | -0.18554 | 0.010122 | 0 |
| chr2 | 35800001 | 35900000 | 691  | 867  | 35850000 | -0.13138 | 0.049572 | 0 |
| chr2 | 36050001 | 36150000 | 689  | 882  | 36100000 | -0.16031 | 0.022265 | 0 |
| chr2 | 36800001 | 36900000 | 926  | 936  | 36850000 | 0.180467 | 0.011357 | 0 |
| chr2 | 37400001 | 37500000 | 940  | 964  | 37450000 | 0.159591 | 0.021947 | 0 |
| chr2 | 37600001 | 37700000 | 800  | 1004 | 37650000 | -0.13172 | 0.049138 | 0 |
| chr2 | 38750001 | 38850000 | 967  | 991  | 38800000 | 0.160594 | 0.021293 | 0 |
| chr2 | 38850001 | 38950000 | 809  | 832  | 38900000 | 0.155519 | 0.024779 | 0 |
| chr2 | 38900001 | 39000000 | 806  | 819  | 38950000 | 0.172879 | 0.014532 | 0 |
| chr2 | 39450001 | 39550000 | 806  | 1022 | 39500000 | -0.14658 | 0.033007 | 0 |
| chr2 | 40050001 | 40150000 | 753  | 972  | 40100000 | -0.17234 | 0.015449 | 0 |
| chr2 | 40150001 | 40250000 | 612  | 789  | 40200000 | -0.17053 | 0.016343 | 0 |
| chr2 | 40500001 | 40600000 | 714  | 917  | 40550000 | -0.16503 | 0.019334 | 0 |
| chr2 | 40900001 | 41000000 | 610  | 780  | 40950000 | -0.1587  | 0.023347 | 0 |
| chr2 | 41350001 | 41450000 | 659  | 837  | 41400000 | -0.14899 | 0.030862 | 0 |

|      |          |          |      |      |          |          |          |   |
|------|----------|----------|------|------|----------|----------|----------|---|
| chr2 | 43100001 | 43200000 | 1061 | 1104 | 43150000 | 0.138648 | 0.039982 | 0 |
| chr2 | 43700001 | 43800000 | 849  | 885  | 43750000 | 0.13605  | 0.042888 | 0 |
| chr2 | 43750001 | 43850000 | 848  | 884  | 43800000 | 0.135981 | 0.042968 | 0 |
| chr2 | 44050001 | 44150000 | 878  | 886  | 44100000 | 0.182877 | 0.010484 | 0 |
| chr2 | 46300001 | 46400000 | 1132 | 1164 | 46350000 | 0.155746 | 0.024613 | 0 |
| chr2 | 46500001 | 46600000 | 1189 | 1216 | 46550000 | 0.163569 | 0.019449 | 0 |
| chr2 | 47100001 | 47200000 | 1061 | 1102 | 47150000 | 0.141263 | 0.037219 | 0 |
| chr2 | 47150001 | 47250000 | 1143 | 1182 | 47200000 | 0.147558 | 0.031207 | 0 |
| chr2 | 47400001 | 47500000 | 1050 | 1095 | 47450000 | 0.135421 | 0.043617 | 0 |
| chr2 | 47950001 | 48050000 | 835  | 870  | 4.80E+07 | 0.136724 | 0.042118 | 0 |
| chr2 | 48150001 | 48250000 | 663  | 854  | 48200000 | -0.16926 | 0.016995 | 0 |
| chr2 | 48950001 | 49050000 | 632  | 819  | 4.90E+07 | -0.17798 | 0.012933 | 0 |
| chr2 | 49150001 | 49250000 | 685  | 864  | 49200000 | -0.13896 | 0.040623 | 0 |
| chr2 | 49250001 | 49350000 | 648  | 840  | 49300000 | -0.17843 | 0.012746 | 0 |
| chr2 | 49350001 | 49450000 | 625  | 791  | 49400000 | -0.14386 | 0.03558  | 0 |
| chr2 | 49550001 | 49650000 | 629  | 814  | 49600000 | -0.17601 | 0.013769 | 0 |
| chr2 | 49600001 | 49700000 | 601  | 759  | 49650000 | -0.14077 | 0.038696 | 0 |
| chr2 | 49700001 | 49800000 | 564  | 713  | 49750000 | -0.14224 | 0.037183 | 0 |
| chr2 | 50450001 | 50550000 | 640  | 807  | 50500000 | -0.13853 | 0.041093 | 0 |
| chr2 | 50500001 | 50600000 | 635  | 804  | 50550000 | -0.14448 | 0.034982 | 0 |
| chr2 | 50800001 | 50900000 | 667  | 841  | 50850000 | -0.13846 | 0.041179 | 0 |
| chr2 | 51100001 | 51200000 | 652  | 820  | 51150000 | -0.13479 | 0.045373 | 0 |
| chr2 | 51650001 | 51750000 | 628  | 807  | 51700000 | -0.16584 | 0.018867 | 0 |
| chr2 | 51700001 | 51800000 | 585  | 749  | 51750000 | -0.16057 | 0.022098 | 0 |
| chr2 | 51900001 | 52000000 | 619  | 794  | 51950000 | -0.16324 | 0.020408 | 0 |
| chr2 | 51950001 | 52050000 | 584  | 757  | 5.20E+07 | -0.17836 | 0.012775 | 0 |
| chr2 | 52100001 | 52200000 | 613  | 798  | 52150000 | -0.18454 | 0.010459 | 0 |
| chr2 | 52350001 | 52450000 | 630  | 808  | 52400000 | -0.16304 | 0.020528 | 0 |
| chr2 | 52900001 | 53000000 | 686  | 886  | 52950000 | -0.17314 | 0.015071 | 0 |
| chr2 | 54700001 | 54800000 | 940  | 971  | 54750000 | 0.149152 | 0.02982  | 0 |
| chr2 | 55000001 | 55100000 | 870  | 1100 | 55050000 | -0.14245 | 0.036972 | 0 |
| chr2 | 56450001 | 56550000 | 726  | 919  | 56500000 | -0.14413 | 0.035314 | 0 |
| chr2 | 56550001 | 56650000 | 683  | 881  | 56600000 | -0.17129 | 0.015962 | 0 |
| chr2 | 56900001 | 57000000 | 604  | 771  | 56950000 | -0.15622 | 0.025102 | 0 |
| chr2 | 56950001 | 57050000 | 609  | 771  | 5.70E+07 | -0.14433 | 0.035127 | 0 |
| chr2 | 57000001 | 57100000 | 601  | 762  | 57050000 | -0.14646 | 0.033114 | 0 |
| chr2 | 57450001 | 57550000 | 486  | 626  | 57500000 | -0.16924 | 0.017006 | 0 |
| chr2 | 57700001 | 57800000 | 620  | 805  | 57750000 | -0.18076 | 0.011828 | 0 |
| chr2 | 57750001 | 57850000 | 537  | 677  | 57800000 | -0.13827 | 0.041383 | 0 |
| chr2 | 57900001 | 58000000 | 682  | 888  | 57950000 | -0.18482 | 0.010361 | 0 |
| chr2 | 58000001 | 58100000 | 691  | 869  | 58050000 | -0.13471 | 0.04547  | 0 |
| chr2 | 58200001 | 58300000 | 729  | 928  | 58250000 | -0.15224 | 0.028145 | 0 |
| chr2 | 58700001 | 58800000 | 663  | 843  | 58750000 | -0.15056 | 0.029523 | 0 |
| chr2 | 58850001 | 58950000 | 703  | 885  | 58900000 | -0.13619 | 0.043732 | 0 |
| chr2 | 59100001 | 59200000 | 745  | 941  | 59150000 | -0.14099 | 0.038468 | 0 |
| chr2 | 59350001 | 59450000 | 670  | 849  | 59400000 | -0.14564 | 0.033877 | 0 |
| chr2 | 59650001 | 59750000 | 686  | 885  | 59700000 | -0.17151 | 0.015857 | 0 |

|      |          |          |      |      |          |          |          |   |
|------|----------|----------|------|------|----------|----------|----------|---|
| chr2 | 59850001 | 59950000 | 663  | 835  | 59900000 | -0.1368  | 0.043027 | 0 |
| chr2 | 60450001 | 60550000 | 790  | 1026 | 60500000 | -0.18114 | 0.011682 | 0 |
| chr2 | 60500001 | 60600000 | 839  | 1054 | 60550000 | -0.13317 | 0.047333 | 0 |
| chr2 | 61250001 | 61350000 | 802  | 835  | 61300000 | 0.137789 | 0.040924 | 0 |
| chr2 | 61300001 | 61400000 | 813  | 848  | 61350000 | 0.135154 | 0.043929 | 0 |
| chr2 | 61350001 | 61450000 | 890  | 928  | 61400000 | 0.135644 | 0.043358 | 0 |
| chr2 | 61650001 | 61750000 | 827  | 858  | 61700000 | 0.142873 | 0.035599 | 0 |
| chr2 | 61750001 | 61850000 | 784  | 803  | 61800000 | 0.161417 | 0.020768 | 0 |
| chr2 | 62050001 | 62150000 | 836  | 855  | 62100000 | 0.163542 | 0.019465 | 0 |
| chr2 | 62100001 | 62200000 | 824  | 837  | 62150000 | 0.17338  | 0.014301 | 0 |
| chr2 | 63150001 | 63250000 | 780  | 987  | 63200000 | -0.14361 | 0.03582  | 0 |
| chr2 | 63500001 | 63600000 | 636  | 798  | 63550000 | -0.1314  | 0.049552 | 0 |
| chr2 | 63750001 | 63850000 | 728  | 744  | 63800000 | 0.164599 | 0.018843 | 0 |
| chr2 | 64200001 | 64300000 | 705  | 898  | 64250000 | -0.15313 | 0.027442 | 0 |
| chr2 | 64250001 | 64350000 | 709  | 890  | 64300000 | -0.13206 | 0.048718 | 0 |
| chr2 | 65200001 | 65300000 | 994  | 1026 | 65250000 | 0.15025  | 0.028894 | 0 |
| chr2 | 65250001 | 65350000 | 910  | 925  | 65300000 | 0.172376 | 0.014767 | 0 |
| chr2 | 65300001 | 65400000 | 833  | 848  | 65350000 | 0.170215 | 0.015815 | 0 |
| chr2 | 65800001 | 65900000 | 811  | 1055 | 65850000 | -0.18351 | 0.010818 | 0 |
| chr2 | 65850001 | 65950000 | 802  | 1043 | 65900000 | -0.1831  | 0.010962 | 0 |
| chr2 | 66000001 | 66100000 | 766  | 995  | 66050000 | -0.18139 | 0.011589 | 0 |
| chr2 | 66800001 | 66900000 | 530  | 678  | 66850000 | -0.15933 | 0.02292  | 0 |
| chr2 | 66900001 | 67000000 | 676  | 857  | 66950000 | -0.14631 | 0.033256 | 0 |
| chr2 | 67000001 | 67100000 | 716  | 913  | 67050000 | -0.15469 | 0.026236 | 0 |
| chr2 | 67250001 | 67350000 | 709  | 895  | 67300000 | -0.14014 | 0.039362 | 0 |
| chr2 | 67350001 | 67450000 | 637  | 800  | 67400000 | -0.13274 | 0.047859 | 0 |
| chr2 | 67850001 | 67950000 | 710  | 893  | 67900000 | -0.13488 | 0.045267 | 0 |
| chr2 | 68050001 | 68150000 | 773  | 970  | 68100000 | -0.13155 | 0.049356 | 0 |
| chr2 | 69300001 | 69400000 | 1118 | 1162 | 69350000 | 0.140273 | 0.038246 | 0 |
| chr2 | 69400001 | 69500000 | 1075 | 1104 | 69450000 | 0.15756  | 0.023323 | 0 |
| chr2 | 69800001 | 69900000 | 982  | 997  | 69850000 | 0.174093 | 0.013978 | 0 |
| chr2 | 70050001 | 70150000 | 957  | 984  | 70100000 | 0.155824 | 0.024557 | 0 |
| chr2 | 70100001 | 70200000 | 1069 | 1097 | 70150000 | 0.158661 | 0.022568 | 0 |
| chr2 | 70150001 | 70250000 | 1070 | 1112 | 70200000 | 0.140417 | 0.038096 | 0 |
| chr2 | 70600001 | 70700000 | 810  | 1038 | 70650000 | -0.16185 | 0.021272 | 0 |
| chr2 | 71050001 | 71150000 | 908  | 933  | 71100000 | 0.156778 | 0.023872 | 0 |
| chr2 | 71550001 | 71650000 | 878  | 914  | 71600000 | 0.13799  | 0.040702 | 0 |
| chr2 | 72550001 | 72650000 | 690  | 870  | 72600000 | -0.13846 | 0.041179 | 0 |
| chr2 | 73250001 | 73350000 | 1061 | 1071 | 73300000 | 0.182429 | 0.010642 | 0 |
| chr2 | 73300001 | 73400000 | 967  | 984  | 73350000 | 0.170821 | 0.015516 | 0 |
| chr2 | 73400001 | 73500000 | 1048 | 1078 | 73450000 | 0.155245 | 0.02498  | 0 |
| chr2 | 73950001 | 74050000 | 649  | 676  | 7.40E+07 | 0.137158 | 0.041628 | 0 |
| chr2 | 74000001 | 74100000 | 748  | 769  | 74050000 | 0.156018 | 0.024416 | 0 |
| chr2 | 74050001 | 74150000 | 981  | 999  | 74100000 | 0.169731 | 0.016059 | 0 |
| chr2 | 74150001 | 74250000 | 1059 | 1073 | 74200000 | 0.177016 | 0.012718 | 0 |
| chr2 | 74350001 | 74450000 | 895  | 916  | 74400000 | 0.162503 | 0.020093 | 0 |
| chr2 | 74500001 | 74600000 | 1021 | 1057 | 74550000 | 0.145971 | 0.032642 | 0 |



|      |          |          |      |      |          |          |          |   |
|------|----------|----------|------|------|----------|----------|----------|---|
| chr2 | 74550001 | 74650000 | 1068 | 1088 | 74600000 | 0.169196 | 0.016332 | 0 |
| chr2 | 76050001 | 76150000 | 619  | 798  | 76100000 | -0.17049 | 0.016366 | 0 |
| chr2 | 76100001 | 76200000 | 668  | 847  | 76150000 | -0.14655 | 0.033034 | 0 |
| chr2 | 76200001 | 76300000 | 575  | 748  | 76250000 | -0.18351 | 0.010816 | 0 |
| chr2 | 76300001 | 76400000 | 537  | 685  | 76350000 | -0.15522 | 0.025841 | 0 |
| chr2 | 76600001 | 76700000 | 581  | 744  | 76650000 | -0.1608  | 0.021945 | 0 |
| chr2 | 76650001 | 76750000 | 557  | 701  | 76700000 | -0.13577 | 0.044214 | 0 |
| chr2 | 77350001 | 77450000 | 479  | 604  | 77400000 | -0.13856 | 0.041065 | 0 |
| chr2 | 77450001 | 77550000 | 586  | 758  | 77500000 | -0.17533 | 0.014065 | 0 |
| chr2 | 77500001 | 77600000 | 585  | 734  | 77550000 | -0.13138 | 0.049576 | 0 |
| chr2 | 78000001 | 78100000 | 551  | 714  | 78050000 | -0.17791 | 0.012961 | 0 |
| chr2 | 78250001 | 78350000 | 600  | 756  | 78300000 | -0.13746 | 0.042285 | 0 |
| chr2 | 78300001 | 78400000 | 569  | 724  | 78350000 | -0.1516  | 0.028667 | 0 |
| chr2 | 78400001 | 78500000 | 576  | 724  | 78450000 | -0.13396 | 0.04637  | 0 |
| chr2 | 78500001 | 78600000 | 547  | 703  | 78550000 | -0.16602 | 0.018765 | 0 |
| chr2 | 79250001 | 79350000 | 529  | 669  | 79300000 | -0.14278 | 0.036649 | 0 |
| chr2 | 79450001 | 79550000 | 615  | 790  | 79500000 | -0.1653  | 0.019177 | 0 |
| chr2 | 80250001 | 80350000 | 611  | 778  | 80300000 | -0.15263 | 0.027832 | 0 |
| chr2 | 81300001 | 81400000 | 612  | 771  | 81350000 | -0.13724 | 0.042537 | 0 |
| chr2 | 81650001 | 81750000 | 592  | 756  | 81700000 | -0.15683 | 0.024663 | 0 |
| chr2 | 81950001 | 82050000 | 560  | 718  | 8.20E+07 | -0.16259 | 0.020804 | 0 |
| chr2 | 82000001 | 82100000 | 547  | 706  | 82050000 | -0.17216 | 0.015535 | 0 |
| chr2 | 82150001 | 82250000 | 568  | 731  | 82200000 | -0.16802 | 0.017657 | 0 |
| chr2 | 82600001 | 82700000 | 603  | 771  | 82650000 | -0.15861 | 0.02341  | 0 |
| chr2 | 82800001 | 82900000 | 590  | 752  | 82850000 | -0.15405 | 0.026723 | 0 |
| chr2 | 83100001 | 83200000 | 584  | 753  | 83150000 | -0.17072 | 0.016249 | 0 |
| chr2 | 83500001 | 83600000 | 531  | 676  | 83550000 | -0.15235 | 0.028061 | 0 |
| chr2 | 83600001 | 83700000 | 620  | 778  | 83650000 | -0.13154 | 0.049374 | 0 |
| chr2 | 83950001 | 84050000 | 542  | 703  | 8.40E+07 | -0.17927 | 0.012409 | 0 |
| chr2 | 84250001 | 84350000 | 678  | 861  | 84300000 | -0.14876 | 0.031054 | 0 |
| chr2 | 84450001 | 84550000 | 713  | 905  | 84500000 | -0.14805 | 0.03168  | 0 |
| chr2 | 84550001 | 84650000 | 627  | 814  | 84600000 | -0.1806  | 0.011888 | 0 |
| chr2 | 84800001 | 84900000 | 719  | 913  | 84850000 | -0.14866 | 0.031146 | 0 |
| chr2 | 85050001 | 85150000 | 1002 | 1034 | 85100000 | 0.150609 | 0.028597 | 0 |
| chr2 | 85550001 | 85650000 | 980  | 992  | 85600000 | 0.178405 | 0.012154 | 0 |
| chr2 | 85650001 | 85750000 | 908  | 916  | 85700000 | 0.183308 | 0.010334 | 0 |
| chr2 | 85700001 | 85800000 | 881  | 902  | 85750000 | 0.161978 | 0.020417 | 0 |
| chr2 | 85800001 | 85900000 | 999  | 1025 | 85850000 | 0.158896 | 0.02241  | 0 |
| chr2 | 85950001 | 86050000 | 1250 | 1263 | 8.60E+07 | 0.181036 | 0.011145 | 0 |
| chr2 | 86300001 | 86400000 | 952  | 984  | 86350000 | 0.148266 | 0.030585 | 0 |
| chr2 | 87200001 | 87300000 | 15   | 19   | 87250000 | -0.14507 | 0.034411 | 0 |
| chr2 | 87550001 | 87650000 | 68   | 86   | 87600000 | -0.14284 | 0.036586 | 0 |
| chr2 | 87850001 | 87950000 | 18   | 23   | 87900000 | -0.15767 | 0.024061 | 0 |
| chr2 | 88100001 | 88200000 | 14   | 18   | 88150000 | -0.16661 | 0.018434 | 0 |
| chr2 | 88300001 | 88400000 | 890  | 908  | 88350000 | 0.167076 | 0.017452 | 0 |
| chr2 | 88500001 | 88600000 | 760  | 966  | 88550000 | -0.15006 | 0.029943 | 0 |
| chr2 | 88550001 | 88650000 | 729  | 935  | 88600000 | -0.16308 | 0.020501 | 0 |

|      |          |          |      |      |          |          |          |   |
|------|----------|----------|------|------|----------|----------|----------|---|
| chr2 | 88900001 | 89000000 | 941  | 982  | 88950000 | 0.134435 | 0.04478  | 0 |
| chr2 | 89750001 | 89850000 | 235  | 295  | 89800000 | -0.13209 | 0.048675 | 0 |
| chr2 | 90400001 | 90500000 | 132  | 167  | 90450000 | -0.14335 | 0.036082 | 0 |
| chr2 | 91850001 | 91950000 | 97   | 124  | 91900000 | -0.15832 | 0.02361  | 0 |
| chr2 | 92000001 | 92100000 | 62   | 63   | 92050000 | 0.172879 | 0.014532 | 0 |
| chr2 | 95400001 | 95500000 | 232  | 241  | 95450000 | 0.141055 | 0.037434 | 0 |
| chr2 | 95500001 | 95600000 | 437  | 451  | 95550000 | 0.150469 | 0.028713 | 0 |
| chr2 | 96000001 | 96100000 | 783  | 801  | 96050000 | 0.163173 | 0.019686 | 0 |
| chr2 | 96250001 | 96350000 | 62   | 78   | 96300000 | -0.13524 | 0.044836 | 0 |
| chr2 | 96350001 | 96450000 | 189  | 238  | 96400000 | -0.13661 | 0.043246 | 0 |
| chr2 | 96400001 | 96500000 | 109  | 141  | 96450000 | -0.1754  | 0.014034 | 0 |
| chr2 | 96500001 | 96600000 | 65   | 83   | 96550000 | -0.15671 | 0.024748 | 0 |
| chr2 | 96750001 | 96850000 | 1183 | 1212 | 96800000 | 0.161023 | 0.021018 | 0 |
| chr2 | 96900001 | 97000000 | 1078 | 1100 | 96950000 | 0.166817 | 0.017593 | 0 |
| chr2 | 97150001 | 97250000 | 1067 | 1103 | 97200000 | 0.14809  | 0.030738 | 0 |
| chr2 | 97650001 | 97750000 | 268  | 337  | 97700000 | -0.13455 | 0.045655 | 0 |
| chr2 | 97800001 | 97900000 | 88   | 112  | 97850000 | -0.15196 | 0.028373 | 0 |
| chr2 | 98000001 | 98100000 | 111  | 115  | 98050000 | 0.144889 | 0.033651 | 0 |
| chr2 | 98150001 | 98250000 | 64   | 66   | 98200000 | 0.151569 | 0.027814 | 0 |
| chr2 | 98250001 | 98350000 | 889  | 912  | 98300000 | 0.159113 | 0.022264 | 0 |
| chr2 | 99850001 | 99950000 | 599  | 776  | 99900000 | -0.17754 | 0.013115 | 0 |
| chr2 | 1E+08    | 1E+08    | 894  | 929  | 1E+08    | 0.140559 | 0.037947 | 0 |
| chr2 | 1E+08    | 1E+08    | 794  | 820  | 1E+08    | 0.149478 | 0.029543 | 0 |
| chr2 | 1E+08    | 1.01E+08 | 872  | 894  | 1.01E+08 | 0.160016 | 0.021667 | 0 |
| chr2 | 1.02E+08 | 1.02E+08 | 988  | 1006 | 1.02E+08 | 0.169916 | 0.015966 | 0 |
| chr2 | 1.02E+08 | 1.02E+08 | 901  | 913  | 1.02E+08 | 0.176875 | 0.012776 | 0 |
| chr2 | 1.02E+08 | 1.02E+08 | 816  | 835  | 1.02E+08 | 0.162756 | 0.019939 | 0 |
| chr2 | 1.02E+08 | 1.02E+08 | 777  | 795  | 1.02E+08 | 0.162923 | 0.019837 | 0 |
| chr2 | 1.03E+08 | 1.03E+08 | 658  | 842  | 1.03E+08 | -0.15977 | 0.022625 | 0 |
| chr2 | 1.03E+08 | 1.04E+08 | 645  | 838  | 1.03E+08 | -0.18169 | 0.011477 | 0 |
| chr2 | 1.04E+08 | 1.04E+08 | 655  | 830  | 1.04E+08 | -0.14565 | 0.033865 | 0 |
| chr2 | 1.04E+08 | 1.04E+08 | 725  | 931  | 1.04E+08 | -0.16484 | 0.019449 | 0 |
| chr2 | 1.04E+08 | 1.04E+08 | 590  | 744  | 1.04E+08 | -0.13862 | 0.040994 | 0 |
| chr2 | 1.04E+08 | 1.05E+08 | 631  | 817  | 1.05E+08 | -0.17673 | 0.013456 | 0 |
| chr2 | 1.05E+08 | 1.05E+08 | 631  | 822  | 1.05E+08 | -0.18554 | 0.010122 | 0 |
| chr2 | 1.05E+08 | 1.05E+08 | 676  | 866  | 1.05E+08 | -0.16138 | 0.02157  | 0 |
| chr2 | 1.05E+08 | 1.05E+08 | 760  | 961  | 1.05E+08 | -0.14257 | 0.036851 | 0 |
| chr2 | 1.06E+08 | 1.06E+08 | 751  | 964  | 1.06E+08 | -0.16426 | 0.019792 | 0 |
| chr2 | 1.07E+08 | 1.07E+08 | 806  | 827  | 1.07E+08 | 0.158856 | 0.022437 | 0 |
| chr2 | 1.07E+08 | 1.07E+08 | 620  | 803  | 1.07E+08 | -0.17717 | 0.01327  | 0 |
| chr2 | 1.08E+08 | 1.08E+08 | 602  | 777  | 1.08E+08 | -0.17219 | 0.015524 | 0 |
| chr2 | 1.08E+08 | 1.08E+08 | 630  | 809  | 1.08E+08 | -0.16482 | 0.019456 | 0 |
| chr2 | 1.08E+08 | 1.08E+08 | 640  | 813  | 1.08E+08 | -0.14922 | 0.03066  | 0 |
| chr2 | 1.08E+08 | 1.08E+08 | 630  | 808  | 1.08E+08 | -0.16304 | 0.020528 | 0 |
| chr2 | 1.09E+08 | 1.09E+08 | 701  | 881  | 1.09E+08 | -0.13376 | 0.046605 | 0 |
| chr2 | 1.09E+08 | 1.09E+08 | 681  | 870  | 1.09E+08 | -0.1574  | 0.024256 | 0 |
| chr2 | 1.09E+08 | 1.09E+08 | 568  | 578  | 1.09E+08 | 0.170784 | 0.015533 | 0 |

|      |          |          |      |      |          |          |          |   |
|------|----------|----------|------|------|----------|----------|----------|---|
| chr2 | 1.1E+08  | 1.1E+08  | 990  | 1023 | 1.1E+08  | 0.148657 | 0.030245 | 0 |
| chr2 | 1.12E+08 | 1.13E+08 | 263  | 332  | 1.13E+08 | -0.14016 | 0.039343 | 0 |
| chr2 | 1.13E+08 | 1.13E+08 | 933  | 975  | 1.13E+08 | 0.132438 | 0.047211 | 0 |
| chr2 | 1.13E+08 | 1.13E+08 | 441  | 565  | 1.13E+08 | -0.16151 | 0.021488 | 0 |
| chr2 | 1.13E+08 | 1.13E+08 | 73   | 75   | 1.13E+08 | 0.156969 | 0.023737 | 0 |
| chr2 | 1.13E+08 | 1.14E+08 | 1010 | 1023 | 1.14E+08 | 0.177512 | 0.012513 | 0 |
| chr2 | 1.14E+08 | 1.14E+08 | 943  | 971  | 1.14E+08 | 0.15375  | 0.026102 | 0 |
| chr2 | 1.14E+08 | 1.14E+08 | 80   | 102  | 1.14E+08 | -0.15453 | 0.026356 | 0 |
| chr2 | 1.15E+08 | 1.15E+08 | 851  | 865  | 1.15E+08 | 0.172422 | 0.014746 | 0 |
| chr2 | 1.15E+08 | 1.15E+08 | 752  | 944  | 1.15E+08 | -0.13209 | 0.048675 | 0 |
| chr2 | 1.15E+08 | 1.15E+08 | 694  | 881  | 1.15E+08 | -0.14824 | 0.031512 | 0 |
| chr2 | 1.16E+08 | 1.16E+08 | 625  | 810  | 1.16E+08 | -0.1781  | 0.012881 | 0 |
| chr2 | 1.17E+08 | 1.17E+08 | 505  | 652  | 1.17E+08 | -0.17263 | 0.015313 | 0 |
| chr2 | 1.17E+08 | 1.18E+08 | 584  | 740  | 1.17E+08 | -0.14559 | 0.033921 | 0 |
| chr2 | 1.17E+08 | 1.18E+08 | 595  | 751  | 1.18E+08 | -0.13996 | 0.039552 | 0 |
| chr2 | 1.18E+08 | 1.18E+08 | 521  | 664  | 1.18E+08 | -0.15394 | 0.026813 | 0 |
| chr2 | 1.18E+08 | 1.18E+08 | 549  | 714  | 1.18E+08 | -0.18315 | 0.010943 | 0 |
| chr2 | 1.18E+08 | 1.18E+08 | 617  | 786  | 1.18E+08 | -0.1533  | 0.027311 | 0 |
| chr2 | 1.18E+08 | 1.18E+08 | 572  | 718  | 1.18E+08 | -0.13201 | 0.048782 | 0 |
| chr2 | 1.19E+08 | 1.19E+08 | 712  | 926  | 1.19E+08 | -0.18317 | 0.010937 | 0 |
| chr2 | 1.19E+08 | 1.19E+08 | 711  | 913  | 1.19E+08 | -0.1648  | 0.01947  | 0 |
| chr2 | 1.2E+08  | 1.2E+08  | 739  | 928  | 1.2E+08  | -0.13259 | 0.048053 | 0 |
| chr2 | 1.22E+08 | 1.22E+08 | 1080 | 1105 | 1.22E+08 | 0.162948 | 0.019822 | 0 |
| chr2 | 1.22E+08 | 1.22E+08 | 1072 | 1121 | 1.22E+08 | 0.131482 | 0.048413 | 0 |
| chr2 | 1.22E+08 | 1.23E+08 | 822  | 857  | 1.22E+08 | 0.135806 | 0.04317  | 0 |
| chr2 | 1.23E+08 | 1.23E+08 | 663  | 845  | 1.23E+08 | -0.15398 | 0.02678  | 0 |
| chr2 | 1.23E+08 | 1.23E+08 | 669  | 852  | 1.23E+08 | -0.15288 | 0.027635 | 0 |
| chr2 | 1.24E+08 | 1.24E+08 | 636  | 819  | 1.24E+08 | -0.16887 | 0.0172   | 0 |
| chr2 | 1.24E+08 | 1.24E+08 | 529  | 673  | 1.24E+08 | -0.15138 | 0.028848 | 0 |
| chr2 | 1.24E+08 | 1.24E+08 | 564  | 721  | 1.24E+08 | -0.15834 | 0.023595 | 0 |
| chr2 | 1.24E+08 | 1.25E+08 | 654  | 824  | 1.25E+08 | -0.13739 | 0.042363 | 0 |
| chr2 | 1.25E+08 | 1.25E+08 | 609  | 789  | 1.25E+08 | -0.17762 | 0.013081 | 0 |
| chr2 | 1.25E+08 | 1.25E+08 | 595  | 769  | 1.25E+08 | -0.17413 | 0.014608 | 0 |
| chr2 | 1.25E+08 | 1.26E+08 | 644  | 826  | 1.26E+08 | -0.16312 | 0.020481 | 0 |
| chr2 | 1.26E+08 | 1.26E+08 | 628  | 803  | 1.26E+08 | -0.15867 | 0.023367 | 0 |
| chr2 | 1.26E+08 | 1.26E+08 | 672  | 867  | 1.26E+08 | -0.17161 | 0.015807 | 0 |
| chr2 | 1.27E+08 | 1.27E+08 | 601  | 759  | 1.27E+08 | -0.14077 | 0.038696 | 0 |
| chr2 | 1.27E+08 | 1.27E+08 | 599  | 762  | 1.27E+08 | -0.15127 | 0.028933 | 0 |
| chr2 | 1.27E+08 | 1.27E+08 | 691  | 880  | 1.27E+08 | -0.15285 | 0.027658 | 0 |
| chr2 | 1.27E+08 | 1.27E+08 | 696  | 903  | 1.27E+08 | -0.17968 | 0.012248 | 0 |
| chr2 | 1.27E+08 | 1.27E+08 | 686  | 879  | 1.27E+08 | -0.16169 | 0.021372 | 0 |
| chr2 | 1.27E+08 | 1.27E+08 | 703  | 899  | 1.27E+08 | -0.15883 | 0.023257 | 0 |
| chr2 | 1.28E+08 | 1.28E+08 | 896  | 933  | 1.28E+08 | 0.137585 | 0.041151 | 0 |
| chr2 | 1.28E+08 | 1.28E+08 | 896  | 915  | 1.28E+08 | 0.16569  | 0.018219 | 0 |
| chr2 | 1.28E+08 | 1.28E+08 | 935  | 968  | 1.28E+08 | 0.145922 | 0.032687 | 0 |
| chr2 | 1.28E+08 | 1.28E+08 | 1028 | 1038 | 1.28E+08 | 0.181997 | 0.010796 | 0 |
| chr2 | 1.28E+08 | 1.28E+08 | 1085 | 1108 | 1.28E+08 | 0.1657   | 0.018213 | 0 |

|      |          |          |      |      |          |          |          |   |
|------|----------|----------|------|------|----------|----------|----------|---|
| chr2 | 1.28E+08 | 1.28E+08 | 1206 | 1219 | 1.28E+08 | 0.180495 | 0.011347 | 0 |
| chr2 | 1.28E+08 | 1.29E+08 | 956  | 973  | 1.29E+08 | 0.170534 | 0.015657 | 0 |
| chr2 | 1.29E+08 | 1.29E+08 | 882  | 903  | 1.29E+08 | 0.162016 | 0.020394 | 0 |
| chr2 | 1.29E+08 | 1.29E+08 | 833  | 864  | 1.29E+08 | 0.143248 | 0.035229 | 0 |
| chr2 | 1.29E+08 | 1.29E+08 | 766  | 783  | 1.29E+08 | 0.164295 | 0.01902  | 0 |
| chr2 | 1.29E+08 | 1.29E+08 | 905  | 918  | 1.29E+08 | 0.175387 | 0.013407 | 0 |
| chr2 | 1.29E+08 | 1.29E+08 | 1027 | 1074 | 1.29E+08 | 0.131405 | 0.04851  | 0 |
| chr2 | 1.3E+08  | 1.3E+08  | 684  | 870  | 1.3E+08  | -0.15106 | 0.029111 | 0 |
| chr2 | 1.3E+08  | 1.3E+08  | 758  | 960  | 1.3E+08  | -0.14487 | 0.034602 | 0 |
| chr2 | 1.3E+08  | 1.3E+08  | 705  | 906  | 1.3E+08  | -0.16592 | 0.01882  | 0 |
| chr2 | 1.31E+08 | 1.31E+08 | 364  | 379  | 1.31E+08 | 0.137704 | 0.041019 | 0 |
| chr2 | 1.31E+08 | 1.31E+08 | 586  | 598  | 1.31E+08 | 0.166718 | 0.017647 | 0 |
| chr2 | 1.31E+08 | 1.31E+08 | 38   | 48   | 1.31E+08 | -0.14107 | 0.038384 | 0 |
| chr2 | 1.32E+08 | 1.32E+08 | 1041 | 1060 | 1.32E+08 | 0.169869 | 0.015989 | 0 |
| chr2 | 1.32E+08 | 1.32E+08 | 956  | 999  | 1.32E+08 | 0.132489 | 0.047148 | 0 |
| chr2 | 1.32E+08 | 1.32E+08 | 108  | 110  | 1.32E+08 | 0.169491 | 0.016181 | 0 |
| chr2 | 1.33E+08 | 1.33E+08 | 115  | 148  | 1.33E+08 | -0.168   | 0.017667 | 0 |
| chr2 | 1.33E+08 | 1.33E+08 | 638  | 807  | 1.33E+08 | -0.14305 | 0.036376 | 0 |
| chr2 | 1.34E+08 | 1.34E+08 | 753  | 956  | 1.34E+08 | -0.1484  | 0.031376 | 0 |
| chr2 | 1.35E+08 | 1.35E+08 | 708  | 919  | 1.35E+08 | -0.18035 | 0.011984 | 0 |
| chr2 | 1.35E+08 | 1.35E+08 | 676  | 869  | 1.35E+08 | -0.16637 | 0.018567 | 0 |
| chr2 | 1.35E+08 | 1.35E+08 | 712  | 896  | 1.35E+08 | -0.13566 | 0.044349 | 0 |
| chr2 | 1.37E+08 | 1.37E+08 | 815  | 847  | 1.37E+08 | 0.140401 | 0.038112 | 0 |
| chr2 | 1.37E+08 | 1.37E+08 | 825  | 1036 | 1.37E+08 | -0.13259 | 0.048044 | 0 |
| chr2 | 1.37E+08 | 1.37E+08 | 794  | 1026 | 1.37E+08 | -0.17386 | 0.014734 | 0 |
| chr2 | 1.37E+08 | 1.37E+08 | 684  | 868  | 1.37E+08 | -0.14774 | 0.031962 | 0 |
| chr2 | 1.37E+08 | 1.37E+08 | 642  | 808  | 1.37E+08 | -0.13582 | 0.044162 | 0 |
| chr2 | 1.37E+08 | 1.38E+08 | 656  | 830  | 1.37E+08 | -0.14345 | 0.035978 | 0 |
| chr2 | 1.38E+08 | 1.38E+08 | 725  | 936  | 1.38E+08 | -0.17256 | 0.015343 | 0 |
| chr2 | 1.38E+08 | 1.38E+08 | 585  | 760  | 1.38E+08 | -0.1816  | 0.01151  | 0 |
| chr2 | 1.38E+08 | 1.38E+08 | 559  | 724  | 1.38E+08 | -0.17718 | 0.013266 | 0 |
| chr2 | 1.38E+08 | 1.38E+08 | 632  | 812  | 1.38E+08 | -0.16559 | 0.01901  | 0 |
| chr2 | 1.38E+08 | 1.39E+08 | 620  | 802  | 1.38E+08 | -0.17537 | 0.014049 | 0 |
| chr2 | 1.39E+08 | 1.39E+08 | 681  | 873  | 1.39E+08 | -0.16236 | 0.020948 | 0 |
| chr2 | 1.39E+08 | 1.39E+08 | 604  | 759  | 1.39E+08 | -0.13359 | 0.046819 | 0 |
| chr2 | 1.39E+08 | 1.39E+08 | 690  | 873  | 1.39E+08 | -0.14342 | 0.036008 | 0 |
| chr2 | 1.39E+08 | 1.39E+08 | 778  | 793  | 1.39E+08 | 0.168412 | 0.016738 | 0 |
| chr2 | 1.39E+08 | 1.39E+08 | 662  | 860  | 1.39E+08 | -0.18154 | 0.011532 | 0 |
| chr2 | 1.4E+08  | 1.4E+08  | 562  | 726  | 1.4E+08  | -0.17344 | 0.01493  | 0 |
| chr2 | 1.4E+08  | 1.4E+08  | 600  | 755  | 1.4E+08  | -0.13555 | 0.044474 | 0 |
| chr2 | 1.4E+08  | 1.4E+08  | 571  | 726  | 1.40E+08 | -0.15052 | 0.02956  | 0 |
| chr2 | 1.4E+08  | 1.4E+08  | 565  | 724  | 1.4E+08  | -0.16178 | 0.021318 | 0 |
| chr2 | 1.4E+08  | 1.4E+08  | 595  | 765  | 1.4E+08  | -0.16661 | 0.018434 | 0 |
| chr2 | 1.4E+08  | 1.41E+08 | 610  | 770  | 1.41E+08 | -0.14009 | 0.039418 | 0 |
| chr2 | 1.41E+08 | 1.41E+08 | 599  | 760  | 1.41E+08 | -0.14748 | 0.03219  | 0 |
| chr2 | 1.41E+08 | 1.41E+08 | 531  | 684  | 1.41E+08 | -0.16932 | 0.016965 | 0 |
| chr2 | 1.41E+08 | 1.41E+08 | 565  | 731  | 1.41E+08 | -0.17566 | 0.013922 | 0 |

|      |          |          |     |      |          |          |          |   |
|------|----------|----------|-----|------|----------|----------|----------|---|
| chr2 | 1.42E+08 | 1.42E+08 | 583 | 735  | 1.42E+08 | -0.13829 | 0.041367 | 0 |
| chr2 | 1.42E+08 | 1.42E+08 | 625 | 798  | 1.42E+08 | -0.15657 | 0.024848 | 0 |
| chr2 | 1.42E+08 | 1.42E+08 | 652 | 819  | 1.42E+08 | -0.13303 | 0.047506 | 0 |
| chr2 | 1.43E+08 | 1.43E+08 | 618 | 782  | 1.43E+08 | -0.1436  | 0.035834 | 0 |
| chr2 | 1.43E+08 | 1.43E+08 | 636 | 812  | 1.43E+08 | -0.15649 | 0.024906 | 0 |
| chr2 | 1.43E+08 | 1.43E+08 | 629 | 817  | 1.43E+08 | -0.18131 | 0.011618 | 0 |
| chr2 | 1.43E+08 | 1.43E+08 | 654 | 825  | 1.43E+08 | -0.13914 | 0.040432 | 0 |
| chr2 | 1.43E+08 | 1.43E+08 | 703 | 909  | 1.43E+08 | -0.17479 | 0.014307 | 0 |
| chr2 | 1.43E+08 | 1.43E+08 | 708 | 896  | 1.43E+08 | -0.14379 | 0.035651 | 0 |
| chr2 | 1.43E+08 | 1.43E+08 | 783 | 996  | 1.43E+08 | -0.15117 | 0.029017 | 0 |
| chr2 | 1.43E+08 | 1.43E+08 | 744 | 944  | 1.43E+08 | -0.14752 | 0.032154 | 0 |
| chr2 | 1.44E+08 | 1.44E+08 | 888 | 929  | 1.44E+08 | 0.130844 | 0.049227 | 0 |
| chr2 | 1.44E+08 | 1.44E+08 | 740 | 933  | 1.44E+08 | -0.13839 | 0.041253 | 0 |
| chr2 | 1.44E+08 | 1.44E+08 | 673 | 857  | 1.44E+08 | -0.15273 | 0.02776  | 0 |
| chr2 | 1.45E+08 | 1.45E+08 | 755 | 961  | 1.45E+08 | -0.1521  | 0.028263 | 0 |
| chr2 | 1.45E+08 | 1.45E+08 | 723 | 924  | 1.45E+08 | -0.15793 | 0.023878 | 0 |
| chr2 | 1.45E+08 | 1.45E+08 | 755 | 971  | 1.45E+08 | -0.16703 | 0.018197 | 0 |
| chr2 | 1.45E+08 | 1.45E+08 | 704 | 894  | 1.45E+08 | -0.14874 | 0.031079 | 0 |
| chr2 | 1.46E+08 | 1.46E+08 | 718 | 927  | 1.46E+08 | -0.17262 | 0.015315 | 0 |
| chr2 | 1.46E+08 | 1.46E+08 | 704 | 902  | 1.46E+08 | -0.16159 | 0.021437 | 0 |
| chr2 | 1.46E+08 | 1.46E+08 | 648 | 833  | 1.46E+08 | -0.16636 | 0.018573 | 0 |
| chr2 | 1.46E+08 | 1.46E+08 | 674 | 860  | 1.46E+08 | -0.15563 | 0.025539 | 0 |
| chr2 | 1.46E+08 | 1.46E+08 | 588 | 745  | 1.46E+08 | -0.14546 | 0.034045 | 0 |
| chr2 | 1.46E+08 | 1.46E+08 | 616 | 791  | 1.46E+08 | -0.16478 | 0.01948  | 0 |
| chr2 | 1.46E+08 | 1.47E+08 | 661 | 836  | 1.46E+08 | -0.14289 | 0.036535 | 0 |
| chr2 | 1.47E+08 | 1.47E+08 | 537 | 690  | 1.47E+08 | -0.16571 | 0.018942 | 0 |
| chr2 | 1.47E+08 | 1.47E+08 | 561 | 709  | 1.47E+08 | -0.14182 | 0.037612 | 0 |
| chr2 | 1.47E+08 | 1.47E+08 | 637 | 805  | 1.47E+08 | -0.14173 | 0.037704 | 0 |
| chr2 | 1.47E+08 | 1.47E+08 | 628 | 790  | 1.47E+08 | -0.13513 | 0.044975 | 0 |
| chr2 | 1.47E+08 | 1.47E+08 | 598 | 754  | 1.47E+08 | -0.13846 | 0.041179 | 0 |
| chr2 | 1.47E+08 | 1.47E+08 | 600 | 761  | 1.47E+08 | -0.14697 | 0.03265  | 0 |
| chr2 | 1.47E+08 | 1.47E+08 | 561 | 716  | 1.47E+08 | -0.156   | 0.025266 | 0 |
| chr2 | 1.48E+08 | 1.48E+08 | 577 | 742  | 1.48E+08 | -0.16688 | 0.018279 | 0 |
| chr2 | 1.48E+08 | 1.48E+08 | 625 | 810  | 1.48E+08 | -0.1781  | 0.012881 | 0 |
| chr2 | 1.48E+08 | 1.48E+08 | 662 | 846  | 1.48E+08 | -0.15786 | 0.023928 | 0 |
| chr2 | 1.49E+08 | 1.49E+08 | 818 | 836  | 1.49E+08 | 0.164561 | 0.018865 | 0 |
| chr2 | 1.49E+08 | 1.49E+08 | 621 | 802  | 1.49E+08 | -0.17305 | 0.015114 | 0 |
| chr2 | 1.49E+08 | 1.49E+08 | 527 | 670  | 1.49E+08 | -0.1504  | 0.029661 | 0 |
| chr2 | 1.49E+08 | 1.49E+08 | 755 | 960  | 1.49E+08 | -0.15059 | 0.029494 | 0 |
| chr2 | 1.49E+08 | 1.49E+08 | 727 | 935  | 1.49E+08 | -0.16705 | 0.018188 | 0 |
| chr2 | 1.51E+08 | 1.51E+08 | 626 | 794  | 1.51E+08 | -0.14701 | 0.032612 | 0 |
| chr2 | 1.51E+08 | 1.51E+08 | 577 | 729  | 1.51E+08 | -0.14138 | 0.038061 | 0 |
| chr2 | 1.52E+08 | 1.52E+08 | 664 | 856  | 1.52E+08 | -0.17046 | 0.016377 | 0 |
| chr2 | 1.53E+08 | 1.53E+08 | 668 | 865  | 1.53E+08 | -0.17689 | 0.013389 | 0 |
| chr2 | 1.53E+08 | 1.53E+08 | 838 | 1059 | 1.53E+08 | -0.14172 | 0.037719 | 0 |
| chr2 | 1.54E+08 | 1.54E+08 | 761 | 961  | 1.54E+08 | -0.14068 | 0.038796 | 0 |
| chr2 | 1.54E+08 | 1.54E+08 | 704 | 914  | 1.54E+08 | -0.18066 | 0.011867 | 0 |

|      |          |          |     |      |          |          |          |   |
|------|----------|----------|-----|------|----------|----------|----------|---|
| chr2 | 1.54E+08 | 1.54E+08 | 659 | 845  | 1.54E+08 | -0.16271 | 0.020733 | 0 |
| chr2 | 1.54E+08 | 1.54E+08 | 734 | 768  | 1.54E+08 | 0.130637 | 0.049494 | 0 |
| chr2 | 1.55E+08 | 1.55E+08 | 679 | 858  | 1.55E+08 | -0.1416  | 0.037836 | 0 |
| chr2 | 1.55E+08 | 1.55E+08 | 637 | 815  | 1.55E+08 | -0.15954 | 0.022776 | 0 |
| chr2 | 1.55E+08 | 1.55E+08 | 601 | 773  | 1.55E+08 | -0.16714 | 0.018137 | 0 |
| chr2 | 1.55E+08 | 1.55E+08 | 608 | 775  | 1.55E+08 | -0.15416 | 0.02664  | 0 |
| chr2 | 1.55E+08 | 1.55E+08 | 581 | 745  | 1.55E+08 | -0.16274 | 0.020714 | 0 |
| chr2 | 1.55E+08 | 1.55E+08 | 637 | 827  | 1.55E+08 | -0.18063 | 0.011877 | 0 |
| chr2 | 1.55E+08 | 1.55E+08 | 649 | 828  | 1.55E+08 | -0.15545 | 0.025669 | 0 |
| chr2 | 1.55E+08 | 1.56E+08 | 705 | 895  | 1.56E+08 | -0.1483  | 0.03146  | 0 |
| chr2 | 1.56E+08 | 1.56E+08 | 631 | 798  | 1.56E+08 | -0.14279 | 0.036639 | 0 |
| chr2 | 1.56E+08 | 1.56E+08 | 579 | 734  | 1.56E+08 | -0.14625 | 0.033307 | 0 |
| chr2 | 1.56E+08 | 1.56E+08 | 606 | 777  | 1.56E+08 | -0.16263 | 0.02078  | 0 |
| chr2 | 1.56E+08 | 1.56E+08 | 640 | 829  | 1.56E+08 | -0.17734 | 0.0132   | 0 |
| chr2 | 1.58E+08 | 1.58E+08 | 670 | 861  | 1.58E+08 | -0.16589 | 0.01884  | 0 |
| chr2 | 1.58E+08 | 1.59E+08 | 666 | 858  | 1.59E+08 | -0.16949 | 0.016876 | 0 |
| chr2 | 1.61E+08 | 1.61E+08 | 968 | 990  | 1.61E+08 | 0.163542 | 0.019465 | 0 |
| chr2 | 1.62E+08 | 1.62E+08 | 639 | 812  | 1.62E+08 | -0.1497  | 0.030248 | 0 |
| chr2 | 1.62E+08 | 1.62E+08 | 673 | 856  | 1.62E+08 | -0.15104 | 0.029123 | 0 |
| chr2 | 1.62E+08 | 1.63E+08 | 675 | 860  | 1.62E+08 | -0.15349 | 0.027162 | 0 |
| chr2 | 1.63E+08 | 1.63E+08 | 659 | 828  | 1.63E+08 | -0.13339 | 0.047063 | 0 |
| chr2 | 1.63E+08 | 1.63E+08 | 776 | 1003 | 1.63E+08 | -0.17423 | 0.014563 | 0 |
| chr2 | 1.63E+08 | 1.63E+08 | 740 | 963  | 1.63E+08 | -0.18405 | 0.010628 | 0 |
| chr2 | 1.64E+08 | 1.64E+08 | 747 | 957  | 1.64E+08 | -0.16145 | 0.021528 | 0 |
| chr2 | 1.64E+08 | 1.64E+08 | 724 | 914  | 1.64E+08 | -0.14024 | 0.039254 | 0 |
| chr2 | 1.64E+08 | 1.64E+08 | 649 | 822  | 1.64E+08 | -0.14496 | 0.034522 | 0 |
| chr2 | 1.65E+08 | 1.65E+08 | 723 | 912  | 1.65E+08 | -0.13908 | 0.040503 | 0 |
| chr2 | 1.66E+08 | 1.66E+08 | 700 | 890  | 1.66E+08 | -0.15049 | 0.029584 | 0 |
| chr2 | 1.66E+08 | 1.66E+08 | 681 | 872  | 1.66E+08 | -0.16071 | 0.022004 | 0 |
| chr2 | 1.67E+08 | 1.67E+08 | 610 | 779  | 1.67E+08 | -0.15685 | 0.024645 | 0 |
| chr2 | 1.67E+08 | 1.67E+08 | 712 | 897  | 1.67E+08 | -0.13727 | 0.042502 | 0 |
| chr2 | 1.67E+08 | 1.67E+08 | 772 | 806  | 1.67E+08 | 0.133784 | 0.045561 | 0 |
| chr2 | 1.67E+08 | 1.67E+08 | 694 | 895  | 1.67E+08 | -0.17099 | 0.016113 | 0 |
| chr2 | 1.67E+08 | 1.67E+08 | 661 | 841  | 1.67E+08 | -0.15149 | 0.028753 | 0 |
| chr2 | 1.67E+08 | 1.68E+08 | 594 | 749  | 1.67E+08 | -0.13854 | 0.041087 | 0 |
| chr2 | 1.67E+08 | 1.68E+08 | 609 | 774  | 1.68E+08 | -0.14993 | 0.030055 | 0 |
| chr2 | 1.68E+08 | 1.68E+08 | 557 | 704  | 1.68E+08 | -0.14194 | 0.037497 | 0 |
| chr2 | 1.68E+08 | 1.68E+08 | 631 | 808  | 1.68E+08 | -0.16075 | 0.021977 | 0 |
| chr2 | 1.69E+08 | 1.69E+08 | 634 | 825  | 1.69E+08 | -0.18395 | 0.010663 | 0 |
| chr2 | 1.69E+08 | 1.69E+08 | 682 | 866  | 1.69E+08 | -0.14863 | 0.03117  | 0 |
| chr2 | 1.69E+08 | 1.69E+08 | 706 | 889  | 1.69E+08 | -0.13655 | 0.043315 | 0 |
| chr2 | 1.7E+08  | 1.7E+08  | 760 | 790  | 1.7E+08  | 0.14011  | 0.038418 | 0 |
| chr2 | 1.7E+08  | 1.71E+08 | 794 | 817  | 1.7E+08  | 0.154766 | 0.025335 | 0 |
| chr2 | 1.72E+08 | 1.72E+08 | 885 | 893  | 1.72E+08 | 0.18298  | 0.010448 | 0 |
| chr2 | 1.72E+08 | 1.72E+08 | 791 | 823  | 1.72E+08 | 0.138748 | 0.039873 | 0 |
| chr2 | 1.73E+08 | 1.73E+08 | 910 | 941  | 1.73E+08 | 0.147635 | 0.031139 | 0 |
| chr2 | 1.73E+08 | 1.73E+08 | 873 | 913  | 1.73E+08 | 0.13133  | 0.048606 | 0 |

|      |          |          |      |      |          |          |          |   |
|------|----------|----------|------|------|----------|----------|----------|---|
| chr2 | 1.73E+08 | 1.73E+08 | 790  | 1010 | 1.73E+08 | -0.15847 | 0.023508 | 0 |
| chr2 | 1.74E+08 | 1.74E+08 | 822  | 859  | 1.74E+08 | 0.132443 | 0.047205 | 0 |
| chr2 | 1.75E+08 | 1.75E+08 | 902  | 927  | 1.75E+08 | 0.156521 | 0.024055 | 0 |
| chr2 | 1.75E+08 | 1.75E+08 | 821  | 1031 | 1.75E+08 | -0.13263 | 0.048004 | 0 |
| chr2 | 1.77E+08 | 1.78E+08 | 885  | 894  | 1.77E+08 | 0.181366 | 0.011024 | 0 |
| chr2 | 1.78E+08 | 1.78E+08 | 890  | 916  | 1.78E+08 | 0.154421 | 0.025594 | 0 |
| chr2 | 1.78E+08 | 1.78E+08 | 1060 | 1093 | 1.78E+08 | 0.151734 | 0.027682 | 0 |
| chr2 | 1.78E+08 | 1.79E+08 | 989  | 1020 | 1.78E+08 | 0.151436 | 0.027921 | 0 |
| chr2 | 1.79E+08 | 1.79E+08 | 791  | 815  | 1.79E+08 | 0.152841 | 0.026805 | 0 |
| chr2 | 1.79E+08 | 1.79E+08 | 927  | 965  | 1.79E+08 | 0.138003 | 0.040687 | 0 |
| chr2 | 1.8E+08  | 1.8E+08  | 610  | 792  | 1.8E+08  | -0.18073 | 0.01184  | 0 |
| chr2 | 1.8E+08  | 1.8E+08  | 658  | 845  | 1.8E+08  | -0.1649  | 0.019412 | 0 |
| chr2 | 1.81E+08 | 1.81E+08 | 681  | 857  | 1.81E+08 | -0.13568 | 0.044326 | 0 |
| chr2 | 1.81E+08 | 1.81E+08 | 697  | 893  | 1.81E+08 | -0.16154 | 0.02147  | 0 |
| chr2 | 1.81E+08 | 1.81E+08 | 652  | 827  | 1.81E+08 | -0.14705 | 0.032576 | 0 |
| chr2 | 1.82E+08 | 1.82E+08 | 645  | 822  | 1.82E+08 | -0.15388 | 0.02686  | 0 |
| chr2 | 1.82E+08 | 1.82E+08 | 721  | 916  | 1.82E+08 | -0.14939 | 0.030518 | 0 |
| chr2 | 1.82E+08 | 1.82E+08 | 735  | 927  | 1.82E+08 | -0.13886 | 0.040734 | 0 |
| chr2 | 1.83E+08 | 1.83E+08 | 721  | 916  | 1.83E+08 | -0.14939 | 0.030518 | 0 |
| chr2 | 1.83E+08 | 1.83E+08 | 712  | 917  | 1.83E+08 | -0.16908 | 0.01709  | 0 |
| chr2 | 1.83E+08 | 1.84E+08 | 722  | 916  | 1.84E+08 | -0.14739 | 0.032275 | 0 |
| chr2 | 1.84E+08 | 1.84E+08 | 731  | 919  | 1.84E+08 | -0.13423 | 0.046041 | 0 |
| chr2 | 1.85E+08 | 1.85E+08 | 498  | 635  | 1.85E+08 | -0.15465 | 0.02627  | 0 |
| chr2 | 1.85E+08 | 1.85E+08 | 576  | 747  | 1.85E+08 | -0.17908 | 0.012486 | 0 |
| chr2 | 1.85E+08 | 1.85E+08 | 559  | 719  | 1.85E+08 | -0.16718 | 0.018115 | 0 |
| chr2 | 1.85E+08 | 1.86E+08 | 629  | 810  | 1.86E+08 | -0.1689  | 0.017187 | 0 |
| chr2 | 1.86E+08 | 1.86E+08 | 640  | 831  | 1.86E+08 | -0.18081 | 0.011807 | 0 |
| chr2 | 1.86E+08 | 1.86E+08 | 661  | 859  | 1.86E+08 | -0.18204 | 0.011345 | 0 |
| chr2 | 1.86E+08 | 1.86E+08 | 673  | 855  | 1.86E+08 | -0.14935 | 0.030544 | 0 |
| chr2 | 1.86E+08 | 1.86E+08 | 627  | 792  | 1.86E+08 | -0.14107 | 0.038384 | 0 |
| chr2 | 1.86E+08 | 1.86E+08 | 617  | 784  | 1.86E+08 | -0.14962 | 0.030317 | 0 |
| chr2 | 1.86E+08 | 1.86E+08 | 732  | 752  | 1.86E+08 | 0.157074 | 0.023663 | 0 |
| chr2 | 1.86E+08 | 1.87E+08 | 681  | 694  | 1.86E+08 | 0.168682 | 0.016597 | 0 |
| chr2 | 1.87E+08 | 1.87E+08 | 674  | 864  | 1.87E+08 | -0.16232 | 0.020976 | 0 |
| chr2 | 1.87E+08 | 1.87E+08 | 699  | 887  | 1.87E+08 | -0.14768 | 0.032013 | 0 |
| chr2 | 1.87E+08 | 1.87E+08 | 581  | 757  | 1.87E+08 | -0.18579 | 0.010036 | 0 |
| chr2 | 1.87E+08 | 1.87E+08 | 559  | 714  | 1.87E+08 | -0.15711 | 0.024458 | 0 |
| chr2 | 1.87E+08 | 1.87E+08 | 616  | 777  | 1.87E+08 | -0.13902 | 0.040561 | 0 |
| chr2 | 1.87E+08 | 1.87E+08 | 707  | 897  | 1.87E+08 | -0.14743 | 0.032231 | 0 |
| chr2 | 1.87E+08 | 1.88E+08 | 934  | 965  | 1.88E+08 | 0.148857 | 0.030073 | 0 |
| chr2 | 1.88E+08 | 1.88E+08 | 810  | 1035 | 1.88E+08 | -0.15767 | 0.024061 | 0 |
| chr2 | 1.88E+08 | 1.88E+08 | 678  | 874  | 1.88E+08 | -0.17038 | 0.016417 | 0 |
| chr2 | 1.88E+08 | 1.88E+08 | 750  | 951  | 1.88E+08 | -0.14659 | 0.032996 | 0 |
| chr2 | 1.88E+08 | 1.88E+08 | 739  | 762  | 1.88E+08 | 0.151746 | 0.027671 | 0 |
| chr2 | 1.91E+08 | 1.91E+08 | 918  | 933  | 1.91E+08 | 0.17258  | 0.014672 | 0 |
| chr2 | 1.91E+08 | 1.91E+08 | 793  | 824  | 1.91E+08 | 0.14064  | 0.037864 | 0 |
| chr2 | 1.91E+08 | 1.91E+08 | 689  | 880  | 1.91E+08 | -0.15704 | 0.024513 | 0 |

|      |          |          |     |      |          |          |          |   |
|------|----------|----------|-----|------|----------|----------|----------|---|
| chr2 | 1.92E+08 | 1.92E+08 | 942 | 978  | 1.92E+08 | 0.141856 | 0.036616 | 0 |
| chr2 | 1.92E+08 | 1.92E+08 | 995 | 1018 | 1.92E+08 | 0.162994 | 0.019794 | 0 |
| chr2 | 1.93E+08 | 1.93E+08 | 607 | 767  | 1.93E+08 | -0.14157 | 0.037873 | 0 |
| chr2 | 1.93E+08 | 1.93E+08 | 673 | 857  | 1.93E+08 | -0.15273 | 0.02776  | 0 |
| chr2 | 1.93E+08 | 1.94E+08 | 641 | 835  | 1.94E+08 | -0.18549 | 0.010137 | 0 |
| chr2 | 1.94E+08 | 1.94E+08 | 686 | 871  | 1.94E+08 | -0.1485  | 0.031285 | 0 |
| chr2 | 1.94E+08 | 1.94E+08 | 691 | 872  | 1.94E+08 | -0.13968 | 0.039852 | 0 |
| chr2 | 1.94E+08 | 1.94E+08 | 667 | 850  | 1.94E+08 | -0.15381 | 0.026909 | 0 |
| chr2 | 1.94E+08 | 1.94E+08 | 667 | 857  | 1.94E+08 | -0.16565 | 0.01898  | 0 |
| chr2 | 1.94E+08 | 1.94E+08 | 673 | 876  | 1.94E+08 | -0.18436 | 0.01052  | 0 |
| chr2 | 1.94E+08 | 1.94E+08 | 643 | 820  | 1.94E+08 | -0.15484 | 0.026123 | 0 |
| chr2 | 1.94E+08 | 1.95E+08 | 602 | 762  | 1.95E+08 | -0.14406 | 0.03538  | 0 |
| chr2 | 1.95E+08 | 1.95E+08 | 620 | 781  | 1.95E+08 | -0.13709 | 0.042701 | 0 |
| chr2 | 1.95E+08 | 1.95E+08 | 632 | 808  | 1.95E+08 | -0.15847 | 0.023508 | 0 |
| chr2 | 1.95E+08 | 1.95E+08 | 706 | 912  | 1.95E+08 | -0.1734  | 0.014946 | 0 |
| chr2 | 1.96E+08 | 1.96E+08 | 610 | 779  | 1.96E+08 | -0.15685 | 0.024645 | 0 |
| chr2 | 1.97E+08 | 1.98E+08 | 963 | 986  | 1.98E+08 | 0.161911 | 0.020459 | 0 |
| chr2 | 1.98E+08 | 1.98E+08 | 767 | 976  | 1.98E+08 | -0.15169 | 0.028591 | 0 |
| chr2 | 1.98E+08 | 1.98E+08 | 836 | 861  | 1.98E+08 | 0.153453 | 0.02633  | 0 |
| chr2 | 1.98E+08 | 1.98E+08 | 749 | 783  | 1.98E+08 | 0.131916 | 0.047863 | 0 |
| chr2 | 1.99E+08 | 1.99E+08 | 713 | 897  | 1.99E+08 | -0.13524 | 0.044836 | 0 |
| chr2 | 1.99E+08 | 1.99E+08 | 666 | 836  | 1.99E+08 | -0.13202 | 0.048767 | 0 |
| chr2 | 2E+08    | 2E+08    | 636 | 809  | 2E+08    | -0.15115 | 0.029034 | 0 |
| chr2 | 2.02E+08 | 2.02E+08 | 922 | 950  | 2.02E+08 | 0.152802 | 0.026835 | 0 |
| chr2 | 2.02E+08 | 2.02E+08 | 914 | 934  | 2.02E+08 | 0.164735 | 0.018764 | 0 |
| chr2 | 2.02E+08 | 2.02E+08 | 669 | 852  | 2.02E+08 | -0.15288 | 0.027635 | 0 |
| chr2 | 2.02E+08 | 2.02E+08 | 887 | 925  | 2.02E+08 | 0.135444 | 0.043591 | 0 |
| chr2 | 2.02E+08 | 2.03E+08 | 617 | 782  | 2.02E+08 | -0.14594 | 0.033602 | 0 |
| chr2 | 2.03E+08 | 2.03E+08 | 818 | 835  | 2.03E+08 | 0.166288 | 0.017885 | 0 |
| chr2 | 2.03E+08 | 2.03E+08 | 839 | 865  | 2.03E+08 | 0.151934 | 0.027521 | 0 |
| chr2 | 2.04E+08 | 2.04E+08 | 888 | 924  | 2.04E+08 | 0.13863  | 0.040001 | 0 |
| chr2 | 2.05E+08 | 2.05E+08 | 695 | 881  | 2.05E+08 | -0.14617 | 0.033388 | 0 |
| chr2 | 2.06E+08 | 2.06E+08 | 612 | 781  | 2.06E+08 | -0.15583 | 0.025389 | 0 |
| chr2 | 2.06E+08 | 2.06E+08 | 724 | 917  | 2.06E+08 | -0.14497 | 0.034511 | 0 |
| chr2 | 2.06E+08 | 2.06E+08 | 722 | 916  | 2.06E+08 | -0.14739 | 0.032275 | 0 |
| chr2 | 2.08E+08 | 2.09E+08 | 917 | 956  | 2.08E+08 | 0.135874 | 0.043091 | 0 |
| chr2 | 2.09E+08 | 2.09E+08 | 764 | 972  | 2.09E+08 | -0.15142 | 0.028812 | 0 |
| chr2 | 2.09E+08 | 2.09E+08 | 801 | 1012 | 2.09E+08 | -0.14137 | 0.038073 | 0 |
| chr2 | 2.09E+08 | 2.09E+08 | 739 | 956  | 2.09E+08 | -0.17547 | 0.014003 | 0 |
| chr2 | 2.1E+08  | 2.1E+08  | 622 | 636  | 2.10E+08 | 0.163851 | 0.019281 | 0 |
| chr2 | 2.1E+08  | 2.1E+08  | 592 | 750  | 2.1E+08  | -0.14533 | 0.034169 | 0 |
| chr2 | 2.1E+08  | 2.1E+08  | 557 | 699  | 2.1E+08  | -0.13165 | 0.04923  | 0 |
| chr2 | 2.1E+08  | 2.1E+08  | 607 | 778  | 2.1E+08  | -0.16211 | 0.021107 | 0 |
| chr2 | 2.11E+08 | 2.11E+08 | 882 | 906  | 2.11E+08 | 0.157231 | 0.023553 | 0 |
| chr2 | 2.11E+08 | 2.12E+08 | 992 | 1006 | 2.11E+08 | 0.175745 | 0.013253 | 0 |
| chr2 | 2.12E+08 | 2.12E+08 | 777 | 975  | 2.12E+08 | -0.13152 | 0.049392 | 0 |
| chr2 | 2.12E+08 | 2.12E+08 | 684 | 884  | 2.12E+08 | -0.17409 | 0.014628 | 0 |



|      |          |          |      |      |          |          |          |   |
|------|----------|----------|------|------|----------|----------|----------|---|
| chr2 | 2.12E+08 | 2.12E+08 | 663  | 841  | 2.12E+08 | -0.14713 | 0.032503 | 0 |
| chr2 | 2.12E+08 | 2.12E+08 | 674  | 848  | 2.12E+08 | -0.13535 | 0.044707 | 0 |
| chr2 | 2.13E+08 | 2.13E+08 | 622  | 807  | 2.13E+08 | -0.17969 | 0.012242 | 0 |
| chr2 | 2.13E+08 | 2.13E+08 | 627  | 806  | 2.13E+08 | -0.16635 | 0.018578 | 0 |
| chr2 | 2.13E+08 | 2.13E+08 | 645  | 824  | 2.13E+08 | -0.15738 | 0.024267 | 0 |
| chr2 | 2.13E+08 | 2.13E+08 | 644  | 822  | 2.13E+08 | -0.15611 | 0.025179 | 0 |
| chr2 | 2.13E+08 | 2.13E+08 | 695  | 876  | 2.13E+08 | -0.13795 | 0.041732 | 0 |
| chr2 | 2.13E+08 | 2.13E+08 | 713  | 925  | 2.13E+08 | -0.17959 | 0.012282 | 0 |
| chr2 | 2.14E+08 | 2.14E+08 | 690  | 890  | 2.14E+08 | -0.17125 | 0.015985 | 0 |
| chr2 | 2.14E+08 | 2.14E+08 | 714  | 903  | 2.14E+08 | -0.14284 | 0.036586 | 0 |
| chr2 | 2.14E+08 | 2.14E+08 | 586  | 762  | 2.14E+08 | -0.18293 | 0.011024 | 0 |
| chr2 | 2.14E+08 | 2.14E+08 | 625  | 813  | 2.14E+08 | -0.18344 | 0.010843 | 0 |
| chr2 | 2.14E+08 | 2.15E+08 | 642  | 806  | 2.14E+08 | -0.13224 | 0.048483 | 0 |
| chr2 | 2.14E+08 | 2.15E+08 | 633  | 821  | 2.15E+08 | -0.17921 | 0.012431 | 0 |
| chr2 | 2.15E+08 | 2.15E+08 | 613  | 786  | 2.15E+08 | -0.16268 | 0.020752 | 0 |
| chr2 | 2.15E+08 | 2.15E+08 | 710  | 905  | 2.15E+08 | -0.15414 | 0.02666  | 0 |
| chr2 | 2.15E+08 | 2.16E+08 | 660  | 853  | 2.15E+08 | -0.17412 | 0.014615 | 0 |
| chr2 | 2.16E+08 | 2.16E+08 | 547  | 704  | 2.16E+08 | -0.16807 | 0.017628 | 0 |
| chr2 | 2.16E+08 | 2.17E+08 | 719  | 932  | 2.16E+08 | -0.17838 | 0.012769 | 0 |
| chr2 | 2.16E+08 | 2.17E+08 | 722  | 933  | 2.17E+08 | -0.17392 | 0.014708 | 0 |
| chr2 | 2.17E+08 | 2.17E+08 | 710  | 899  | 2.17E+08 | -0.14454 | 0.034922 | 0 |
| chr2 | 2.18E+08 | 2.18E+08 | 766  | 964  | 2.18E+08 | -0.13573 | 0.04427  | 0 |
| chr2 | 2.18E+08 | 2.18E+08 | 889  | 918  | 2.18E+08 | 0.149652 | 0.029395 | 0 |
| chr2 | 2.19E+08 | 2.19E+08 | 1243 | 1298 | 2.19E+08 | 0.133499 | 0.045907 | 0 |
| chr2 | 2.19E+08 | 2.19E+08 | 1224 | 1249 | 2.19E+08 | 0.166793 | 0.017606 | 0 |
| chr2 | 2.19E+08 | 2.19E+08 | 907  | 925  | 2.19E+08 | 0.167612 | 0.017162 | 0 |
| chr2 | 2.2E+08  | 2.2E+08  | 1006 | 1046 | 2.2E+08  | 0.13971  | 0.03884  | 0 |
| chr2 | 2.2E+08  | 2.2E+08  | 1032 | 1059 | 2.2E+08  | 0.158703 | 0.022539 | 0 |
| chr2 | 2.2E+08  | 2.2E+08  | 1150 | 1178 | 2.2E+08  | 0.161257 | 0.020869 | 0 |
| chr2 | 2.2E+08  | 2.2E+08  | 751  | 769  | 2.2E+08  | 0.161792 | 0.020533 | 0 |
| chr2 | 2.2E+08  | 2.2E+08  | 696  | 728  | 2.2E+08  | 0.131112 | 0.048884 | 0 |
| chr2 | 2.2E+08  | 2.2E+08  | 819  | 836  | 2.2E+08  | 0.166324 | 0.017865 | 0 |
| chr2 | 2.21E+08 | 2.21E+08 | 695  | 710  | 2.21E+08 | 0.165157 | 0.018522 | 0 |
| chr2 | 2.21E+08 | 2.21E+08 | 568  | 590  | 2.21E+08 | 0.141139 | 0.037347 | 0 |
| chr2 | 2.21E+08 | 2.21E+08 | 451  | 587  | 2.21E+08 | -0.18427 | 0.010551 | 0 |
| chr2 | 2.21E+08 | 2.21E+08 | 471  | 601  | 2.21E+08 | -0.15567 | 0.025502 | 0 |
| chr2 | 2.21E+08 | 2.22E+08 | 470  | 591  | 2.22E+08 | -0.13453 | 0.045677 | 0 |
| chr2 | 2.22E+08 | 2.22E+08 | 438  | 550  | 2.22E+08 | -0.13254 | 0.048115 | 0 |
| chr2 | 2.22E+08 | 2.22E+08 | 458  | 585  | 2.22E+08 | -0.15713 | 0.024449 | 0 |
| chr2 | 2.22E+08 | 2.22E+08 | 452  | 575  | 2.22E+08 | -0.15128 | 0.02893  | 0 |
| chr2 | 2.23E+08 | 2.23E+08 | 447  | 577  | 2.23E+08 | -0.17233 | 0.015454 | 0 |
| chr2 | 2.24E+08 | 2.24E+08 | 605  | 616  | 2.24E+08 | 0.169968 | 0.015939 | 0 |
| chr2 | 2.24E+08 | 2.24E+08 | 638  | 662  | 2.24E+08 | 0.142688 | 0.035781 | 0 |
| chr2 | 2.24E+08 | 2.24E+08 | 537  | 693  | 2.24E+08 | -0.17197 | 0.015629 | 0 |
| chr2 | 2.24E+08 | 2.24E+08 | 442  | 561  | 2.24E+08 | -0.14799 | 0.031734 | 0 |
| chr2 | 2.25E+08 | 2.25E+08 | 534  | 545  | 2.25E+08 | 0.166547 | 0.017741 | 0 |
| chr2 | 2.25E+08 | 2.25E+08 | 579  | 600  | 2.25E+08 | 0.144564 | 0.033958 | 0 |

|      |          |          |     |     |          |          |          |   |
|------|----------|----------|-----|-----|----------|----------|----------|---|
| chr2 | 2.27E+08 | 2.27E+08 | 480 | 604 | 2.27E+08 | -0.13555 | 0.044474 | 0 |
| chr2 | 2.27E+08 | 2.27E+08 | 450 | 581 | 2.27E+08 | -0.17265 | 0.015302 | 0 |
| chr2 | 2.28E+08 | 2.28E+08 | 591 | 608 | 2.28E+08 | 0.15505  | 0.025124 | 0 |
| chr2 | 2.3E+08  | 2.3E+08  | 453 | 582 | 2.3E+08  | -0.16555 | 0.019037 | 0 |
| chr2 | 2.3E+08  | 2.3E+08  | 484 | 615 | 2.3E+08  | -0.14962 | 0.03032  | 0 |
| chr2 | 2.3E+08  | 2.3E+08  | 527 | 673 | 2.30E+08 | -0.15684 | 0.024653 | 0 |
| chr2 | 2.31E+08 | 2.31E+08 | 637 | 664 | 2.31E+08 | 0.136073 | 0.042862 | 0 |
| chr2 | 2.31E+08 | 2.31E+08 | 534 | 542 | 2.31E+08 | 0.17451  | 0.013792 | 0 |
| chr2 | 2.31E+08 | 2.31E+08 | 473 | 494 | 2.31E+08 | 0.133292 | 0.046159 | 0 |
| chr2 | 2.31E+08 | 2.31E+08 | 456 | 577 | 2.31E+08 | -0.14357 | 0.035858 | 0 |
| chr2 | 2.32E+08 | 2.32E+08 | 634 | 650 | 2.32E+08 | 0.160006 | 0.021674 | 0 |
| chr2 | 2.32E+08 | 2.32E+08 | 639 | 659 | 2.32E+08 | 0.151501 | 0.027869 | 0 |
| chr2 | 2.32E+08 | 2.32E+08 | 660 | 683 | 2.32E+08 | 0.146543 | 0.032118 | 0 |
| chr2 | 2.32E+08 | 2.32E+08 | 637 | 664 | 2.32E+08 | 0.136073 | 0.042862 | 0 |
| chr2 | 2.33E+08 | 2.33E+08 | 635 | 659 | 2.33E+08 | 0.142441 | 0.036027 | 0 |
| chr2 | 2.33E+08 | 2.33E+08 | 529 | 666 | 2.33E+08 | -0.13629 | 0.043615 | 0 |
| chr2 | 2.33E+08 | 2.34E+08 | 708 | 729 | 2.33E+08 | 0.153794 | 0.026069 | 0 |
| chr2 | 2.34E+08 | 2.34E+08 | 620 | 647 | 2.34E+08 | 0.134466 | 0.044743 | 0 |
| chr2 | 2.34E+08 | 2.34E+08 | 647 | 672 | 2.34E+08 | 0.141268 | 0.037215 | 0 |
| chr2 | 2.34E+08 | 2.34E+08 | 751 | 781 | 2.34E+08 | 0.139453 | 0.039114 | 0 |
| chr2 | 2.35E+08 | 2.35E+08 | 652 | 680 | 2.35E+08 | 0.1353   | 0.043758 | 0 |
| chr2 | 2.36E+08 | 2.36E+08 | 734 | 747 | 2.36E+08 | 0.170635 | 0.015607 | 0 |
| chr2 | 2.36E+08 | 2.37E+08 | 670 | 688 | 2.37E+08 | 0.157716 | 0.023215 | 0 |
| chr2 | 2.37E+08 | 2.37E+08 | 703 | 717 | 2.37E+08 | 0.167515 | 0.017215 | 0 |
| chr2 | 2.37E+08 | 2.37E+08 | 542 | 684 | 2.37E+08 | -0.13974 | 0.039786 | 0 |
| chr2 | 2.38E+08 | 2.38E+08 | 618 | 645 | 2.38E+08 | 0.134271 | 0.044976 | 0 |
| chr2 | 2.38E+08 | 2.38E+08 | 658 | 676 | 2.38E+08 | 0.157027 | 0.023696 | 0 |
| chr2 | 2.38E+08 | 2.38E+08 | 669 | 691 | 2.38E+08 | 0.149284 | 0.029708 | 0 |
| chr2 | 2.38E+08 | 2.38E+08 | 678 | 709 | 2.38E+08 | 0.131463 | 0.048437 | 0 |
| chr2 | 2.38E+08 | 2.38E+08 | 681 | 708 | 2.38E+08 | 0.139868 | 0.038672 | 0 |
| chr2 | 2.39E+08 | 2.39E+08 | 616 | 636 | 2.39E+08 | 0.149867 | 0.029215 | 0 |
| chr2 | 2.39E+08 | 2.39E+08 | 639 | 654 | 2.39E+08 | 0.162488 | 0.020102 | 0 |
| chr2 | 2.39E+08 | 2.39E+08 | 727 | 736 | 2.39E+08 | 0.178213 | 0.01223  | 0 |
| chr2 | 2.39E+08 | 2.39E+08 | 720 | 740 | 2.39E+08 | 0.156435 | 0.024117 | 0 |
| chr2 | 2.39E+08 | 2.4E+08  | 667 | 696 | 2.4E+08  | 0.134562 | 0.044628 | 0 |
| chr2 | 2.4E+08  | 2.4E+08  | 655 | 668 | 2.4E+08  | 0.16761  | 0.017164 | 0 |
| chr2 | 2.4E+08  | 2.4E+08  | 716 | 729 | 2.4E+08  | 0.170004 | 0.015921 | 0 |
| chr2 | 2.4E+08  | 2.4E+08  | 704 | 727 | 2.4E+08  | 0.149583 | 0.029454 | 0 |
| chr2 | 2.4E+08  | 2.4E+08  | 761 | 782 | 2.4E+08  | 0.156691 | 0.023934 | 0 |
| chr2 | 2.41E+08 | 2.41E+08 | 696 | 719 | 2.41E+08 | 0.149059 | 0.0299   | 0 |
| chr2 | 2.41E+08 | 2.41E+08 | 711 | 717 | 2.41E+08 | 0.183839 | 0.010152 | 0 |
| chr2 | 2.41E+08 | 2.41E+08 | 760 | 774 | 2.41E+08 | 0.169629 | 0.016111 | 0 |
| chr2 | 2.41E+08 | 2.41E+08 | 727 | 751 | 2.41E+08 | 0.149105 | 0.02986  | 0 |
| chr2 | 2.41E+08 | 2.41E+08 | 772 | 784 | 2.41E+08 | 0.17371  | 0.014151 | 0 |
| chr2 | 2.41E+08 | 2.41E+08 | 768 | 799 | 2.41E+08 | 0.138874 | 0.039737 | 0 |
| chr2 | 2.41E+08 | 2.41E+08 | 727 | 759 | 2.41E+08 | 0.133819 | 0.045519 | 0 |
| chr2 | 2.41E+08 | 2.41E+08 | 801 | 828 | 2.41E+08 | 0.148135 | 0.0307   | 0 |

|       |          |          |      |      |          |          |          |   |
|-------|----------|----------|------|------|----------|----------|----------|---|
| chr2  | 2.41E+08 | 2.42E+08 | 663  | 684  | 2.41E+08 | 0.150976 | 0.028296 | 0 |
| chr2  | 2.42E+08 | 2.42E+08 | 766  | 792  | 2.42E+08 | 0.147807 | 0.030987 | 0 |
| chr2  | 2.42E+08 | 2.42E+08 | 555  | 569  | 2.42E+08 | 0.160022 | 0.021663 | 0 |
| chr2  | 2.42E+08 | 2.42E+08 | 694  | 722  | 2.42E+08 | 0.1389   | 0.039708 | 0 |
| chr2  | 2.43E+08 | 2.43E+08 | 706  | 724  | 2.43E+08 | 0.159642 | 0.021913 | 0 |
| chr2  | 2.43E+08 | 2.43E+08 | 742  | 760  | 2.43E+08 | 0.161383 | 0.02079  | 0 |
| chr20 | 250001   | 350000   | 1102 | 1077 | 3.00E+05 | 0.229069 | 0.00193  | 0 |
| chr20 | 300001   | 400000   | 1127 | 1049 | 350000   | 0.299436 | 8.19E-05 | 0 |
| chr20 | 350001   | 450000   | 1090 | 1054 | 4.00E+05 | 0.244416 | 0.001029 | 0 |
| chr20 | 600001   | 700000   | 1185 | 1193 | 650000   | 0.186256 | 0.009359 | 0 |
| chr20 | 750001   | 850000   | 920  | 901  | 8.00E+05 | 0.22607  | 0.002175 | 0 |
| chr20 | 3000001  | 3100000  | 973  | 978  | 3050000  | 0.188568 | 0.008651 | 0 |
| chr20 | 3150001  | 3250000  | 1027 | 1023 | 3200000  | 0.201593 | 0.005478 | 0 |
| chr20 | 3650001  | 3750000  | 1213 | 1212 | 3700000  | 0.197153 | 0.006419 | 0 |
| chr20 | 3700001  | 3800000  | 1161 | 1089 | 3750000  | 0.288327 | 0.000141 | 0 |
| chr20 | 3750001  | 3850000  | 988  | 945  | 3800000  | 0.26016  | 0.000521 | 0 |
| chr20 | 7500001  | 7600000  | 611  | 867  | 7550000  | -0.3089  | 6.36E-05 | 0 |
| chr20 | 7550001  | 7650000  | 627  | 870  | 7600000  | -0.27659 | 0.000291 | 0 |
| chr20 | 12900001 | 13000000 | 703  | 956  | 12950000 | -0.24752 | 0.001018 | 0 |
| chr20 | 12950001 | 13050000 | 755  | 1010 | 1.30E+07 | -0.22384 | 0.0026   | 0 |
| chr20 | 13000001 | 13100000 | 750  | 1010 | 13050000 | -0.23343 | 0.001795 | 0 |
| chr20 | 14050001 | 14150000 | 580  | 764  | 14100000 | -0.20156 | 0.005871 | 0 |
| chr20 | 14100001 | 14200000 | 552  | 771  | 14150000 | -0.2861  | 0.000189 | 0 |
| chr20 | 14700001 | 14800000 | 556  | 736  | 14750000 | -0.20866 | 0.004561 | 0 |
| chr20 | 15150001 | 15250000 | 606  | 791  | 15200000 | -0.1884  | 0.009206 | 0 |
| chr20 | 15200001 | 15300000 | 590  | 832  | 15250000 | -0.29991 | 9.85E-05 | 0 |
| chr20 | 15400001 | 15500000 | 658  | 877  | 15450000 | -0.21853 | 0.003176 | 0 |
| chr20 | 15600001 | 15700000 | 607  | 811  | 15650000 | -0.22204 | 0.002784 | 0 |
| chr20 | 16800001 | 16900000 | 590  | 782  | 16850000 | -0.21049 | 0.004269 | 0 |
| chr20 | 18400001 | 18500000 | 880  | 885  | 18450000 | 0.187789 | 0.008884 | 0 |
| chr20 | 19950001 | 20050000 | 904  | 895  | 2.00E+07 | 0.210398 | 0.003968 | 0 |
| chr20 | 20200001 | 20300000 | 713  | 952  | 20250000 | -0.2211  | 0.002885 | 0 |
| chr20 | 20250001 | 20350000 | 662  | 907  | 20300000 | -0.25831 | 0.000648 | 0 |
| chr20 | 20350001 | 20450000 | 766  | 1063 | 20400000 | -0.27676 | 0.000289 | 0 |
| chr20 | 21050001 | 21150000 | 974  | 977  | 21100000 | 0.191526 | 0.007815 | 0 |
| chr20 | 21700001 | 21800000 | 660  | 860  | 21750000 | -0.18591 | 0.009998 | 0 |
| chr20 | 25800001 | 25900000 | 167  | 225  | 25850000 | -0.23411 | 0.001747 | 0 |
| chr20 | 25850001 | 25950000 | 170  | 243  | 25900000 | -0.31946 | 3.76E-05 | 0 |
| chr20 | 26000001 | 26100000 | 78   | 58   | 26050000 | 0.623384 | 8.02E-15 | 0 |
| chr20 | 26050001 | 26150000 | 242  | 229  | 26100000 | 0.275622 | 0.000258 | 0 |
| chr20 | 29350001 | 29450000 | 59   | 82   | 29400000 | -0.27895 | 0.000262 | 0 |
| chr20 | 29550001 | 29650000 | 578  | 773  | 29600000 | -0.22344 | 0.00264  | 0 |
| chr20 | 29600001 | 29700000 | 552  | 754  | 29650000 | -0.25393 | 0.00078  | 0 |
| chr20 | 29650001 | 29750000 | 133  | 178  | 29700000 | -0.22449 | 0.002537 | 0 |
| chr20 | 30100001 | 30200000 | 950  | 901  | 30150000 | 0.272363 | 0.0003   | 0 |
| chr20 | 30150001 | 30250000 | 845  | 843  | 30200000 | 0.199382 | 0.00593  | 0 |
| chr20 | 30300001 | 30400000 | 975  | 887  | 30350000 | 0.332431 | 1.46E-05 | 0 |

|       |          |          |      |      |          |          |          |   |
|-------|----------|----------|------|------|----------|----------|----------|---|
| chr20 | 30350001 | 30450000 | 1169 | 1084 | 30400000 | 0.304873 | 6.23E-05 | 0 |
| chr20 | 30400001 | 30500000 | 1180 | 1173 | 30450000 | 0.204547 | 0.004922 | 0 |
| chr20 | 30550001 | 30650000 | 1086 | 1075 | 30600000 | 0.21065  | 0.00393  | 0 |
| chr20 | 30950001 | 31050000 | 998  | 969  | 3.10E+07 | 0.238506 | 0.001316 | 0 |
| chr20 | 31000001 | 31100000 | 1168 | 1100 | 31050000 | 0.2825   | 0.000187 | 0 |
| chr20 | 32000001 | 32100000 | 809  | 810  | 32050000 | 0.194181 | 0.007126 | 0 |
| chr20 | 32300001 | 32400000 | 913  | 911  | 32350000 | 0.199127 | 0.005984 | 0 |
| chr20 | 32650001 | 32750000 | 918  | 884  | 32700000 | 0.250411 | 0.000797 | 0 |
| chr20 | 33200001 | 33300000 | 860  | 854  | 33250000 | 0.206064 | 0.004657 | 0 |
| chr20 | 33250001 | 33350000 | 974  | 938  | 33300000 | 0.250297 | 0.000801 | 0 |
| chr20 | 33400001 | 33500000 | 958  | 961  | 33450000 | 0.191452 | 0.007835 | 0 |
| chr20 | 33800001 | 33900000 | 1116 | 1096 | 33850000 | 0.222052 | 0.002545 | 0 |
| chr20 | 34100001 | 34200000 | 991  | 994  | 34150000 | 0.191602 | 0.007794 | 0 |
| chr20 | 34150001 | 34250000 | 1035 | 961  | 34200000 | 0.302985 | 6.86E-05 | 0 |
| chr20 | 34200001 | 34300000 | 1028 | 933  | 34250000 | 0.335854 | 1.21E-05 | 0 |
| chr20 | 34250001 | 34350000 | 939  | 844  | 34300000 | 0.349845 | 5.55E-06 | 0 |
| chr20 | 34300001 | 34400000 | 871  | 776  | 34350000 | 0.362579 | 2.66E-06 | 0 |
| chr20 | 34350001 | 34450000 | 901  | 843  | 34400000 | 0.291958 | 0.000118 | 0 |
| chr20 | 34400001 | 34500000 | 939  | 892  | 34450000 | 0.270044 | 0.000334 | 0 |
| chr20 | 36650001 | 36750000 | 1134 | 1120 | 36700000 | 0.213885 | 0.003481 | 0 |
| chr20 | 37050001 | 37150000 | 989  | 971  | 37100000 | 0.222462 | 0.002505 | 0 |
| chr20 | 37350001 | 37450000 | 956  | 963  | 37400000 | 0.185438 | 0.009621 | 0 |
| chr20 | 38100001 | 38200000 | 644  | 849  | 38150000 | -0.20274 | 0.005631 | 0 |
| chr20 | 38900001 | 39000000 | 784  | 1023 | 38950000 | -0.18792 | 0.009354 | 0 |
| chr20 | 39450001 | 39550000 | 850  | 1138 | 39500000 | -0.225   | 0.002487 | 0 |
| chr20 | 41200001 | 41300000 | 648  | 847  | 41250000 | -0.19041 | 0.008608 | 0 |
| chr20 | 41300001 | 41400000 | 705  | 944  | 41350000 | -0.2252  | 0.002469 | 0 |
| chr20 | 41350001 | 41450000 | 679  | 933  | 41400000 | -0.2625  | 0.000541 | 0 |
| chr20 | 41400001 | 41500000 | 642  | 841  | 41450000 | -0.19357 | 0.007735 | 0 |
| chr20 | 43100001 | 43200000 | 991  | 973  | 43150000 | 0.222408 | 0.00251  | 0 |
| chr20 | 43300001 | 43400000 | 1121 | 1108 | 43350000 | 0.212791 | 0.003628 | 0 |
| chr20 | 44350001 | 44450000 | 856  | 847  | 44400000 | 0.211212 | 0.003849 | 0 |
| chr20 | 44400001 | 44500000 | 1020 | 939  | 44450000 | 0.315335 | 3.64E-05 | 0 |
| chr20 | 44450001 | 44550000 | 1033 | 943  | 44500000 | 0.327474 | 1.91E-05 | 0 |
| chr20 | 44500001 | 44600000 | 1085 | 1015 | 44550000 | 0.292178 | 0.000117 | 0 |
| chr20 | 44900001 | 45000000 | 1189 | 1190 | 44950000 | 0.19475  | 0.006985 | 0 |
| chr20 | 44950001 | 45050000 | 1059 | 1063 | 4.50E+07 | 0.190524 | 0.00809  | 0 |
| chr20 | 45950001 | 46050000 | 915  | 880  | 4.60E+07 | 0.252231 | 0.000737 | 0 |
| chr20 | 46000001 | 46100000 | 805  | 807  | 46050000 | 0.192383 | 0.007586 | 0 |
| chr20 | 47400001 | 47500000 | 1094 | 1071 | 47450000 | 0.226617 | 0.002128 | 0 |
| chr20 | 47450001 | 47550000 | 981  | 969  | 47500000 | 0.21372  | 0.003503 | 0 |
| chr20 | 47750001 | 47850000 | 861  | 829  | 47800000 | 0.250604 | 0.000791 | 0 |
| chr20 | 47800001 | 47900000 | 916  | 893  | 47850000 | 0.23265  | 0.001672 | 0 |
| chr20 | 48250001 | 48350000 | 1038 | 1021 | 48300000 | 0.219787 | 0.002779 | 0 |
| chr20 | 48300001 | 48400000 | 953  | 952  | 48350000 | 0.197478 | 0.006345 | 0 |
| chr20 | 48550001 | 48650000 | 986  | 994  | 48600000 | 0.184305 | 0.009995 | 0 |
| chr20 | 48700001 | 48800000 | 1098 | 1014 | 48750000 | 0.310783 | 4.61E-05 | 0 |

|       |          |          |      |      |          |          |          |   |
|-------|----------|----------|------|------|----------|----------|----------|---|
| chr20 | 48750001 | 48850000 | 1132 | 1057 | 48800000 | 0.294862 | 0.000103 | 0 |
| chr20 | 48900001 | 49000000 | 1185 | 1127 | 48950000 | 0.268363 | 0.000361 | 0 |
| chr20 | 48950001 | 49050000 | 998  | 969  | 4.90E+07 | 0.238506 | 0.001316 | 0 |
| chr20 | 49050001 | 49150000 | 983  | 985  | 49100000 | 0.193031 | 0.007417 | 0 |
| chr20 | 49100001 | 49200000 | 1122 | 1065 | 49150000 | 0.271182 | 0.000317 | 0 |
| chr20 | 49150001 | 49250000 | 1106 | 1080 | 49200000 | 0.230283 | 0.001839 | 0 |
| chr20 | 49300001 | 49400000 | 910  | 882  | 49350000 | 0.241051 | 0.001185 | 0 |
| chr20 | 49550001 | 49650000 | 1052 | 1060 | 49600000 | 0.185033 | 0.009753 | 0 |
| chr20 | 53500001 | 53600000 | 576  | 776  | 53550000 | -0.23402 | 0.001753 | 0 |
| chr20 | 54500001 | 54600000 | 657  | 889  | 54550000 | -0.24033 | 0.001364 | 0 |
| chr20 | 57550001 | 57650000 | 1078 | 1040 | 57600000 | 0.247737 | 0.000894 | 0 |
| chr20 | 60700001 | 60800000 | 1180 | 1184 | 60750000 | 0.191081 | 0.007936 | 0 |
| chr20 | 60800001 | 60900000 | 1243 | 1218 | 60850000 | 0.225275 | 0.002244 | 0 |
| chr20 | 60850001 | 60950000 | 1297 | 1219 | 60900000 | 0.285443 | 0.000162 | 0 |
| chr20 | 60900001 | 61000000 | 1368 | 1260 | 60950000 | 0.314608 | 3.78E-05 | 0 |
| chr20 | 60950001 | 61050000 | 1381 | 1311 | 6.10E+07 | 0.271009 | 0.000319 | 0 |
| chr20 | 61150001 | 61250000 | 819  | 820  | 61200000 | 0.194203 | 0.00712  | 0 |
| chr20 | 61200001 | 61300000 | 687  | 672  | 61250000 | 0.227812 | 0.00203  | 0 |
| chr20 | 61250001 | 61350000 | 1195 | 1160 | 61300000 | 0.238849 | 0.001298 | 0 |
| chr20 | 61400001 | 61500000 | 1164 | 1145 | 61450000 | 0.219706 | 0.002788 | 0 |
| chr20 | 61450001 | 61550000 | 1154 | 1130 | 61500000 | 0.226283 | 0.002156 | 0 |
| chr20 | 61500001 | 61600000 | 1220 | 1204 | 61550000 | 0.215009 | 0.003336 | 0 |
| chr20 | 61550001 | 61650000 | 1231 | 1214 | 61600000 | 0.216025 | 0.00321  | 0 |
| chr20 | 61600001 | 61700000 | 1243 | 1232 | 61650000 | 0.208787 | 0.004212 | 0 |
| chr20 | 61800001 | 61900000 | 1237 | 1233 | 61850000 | 0.200636 | 0.00567  | 0 |
| chr20 | 61850001 | 61950000 | 1259 | 1238 | 61900000 | 0.22023  | 0.002732 | 0 |
| chr20 | 62050001 | 62150000 | 1307 | 1219 | 62100000 | 0.296524 | 9.47E-05 | 0 |
| chr20 | 62100001 | 62200000 | 1261 | 1211 | 62150000 | 0.254332 | 0.000673 | 0 |
| chr20 | 62250001 | 62350000 | 1146 | 1046 | 62300000 | 0.327687 | 1.89E-05 | 0 |
| chr20 | 62300001 | 62400000 | 1238 | 1082 | 62350000 | 0.390274 | 4.98E-07 | 0 |
| chr20 | 62350001 | 62450000 | 1077 | 1008 | 62400000 | 0.291486 | 0.000121 | 0 |
| chr20 | 62400001 | 62500000 | 1022 | 1023 | 62450000 | 0.194552 | 0.007034 | 0 |
| chr20 | 62450001 | 62550000 | 1049 | 979  | 62500000 | 0.295597 | 9.91E-05 | 0 |
| chr20 | 62500001 | 62600000 | 1082 | 995  | 62550000 | 0.316895 | 3.36E-05 | 0 |
| chr20 | 62550001 | 62650000 | 1039 | 986  | 62600000 | 0.271499 | 0.000312 | 0 |
| chr20 | 62600001 | 62700000 | 1083 | 1071 | 62650000 | 0.212038 | 0.003732 | 0 |
| chr20 | 62650001 | 62750000 | 1294 | 1237 | 62700000 | 0.260955 | 0.000503 | 0 |
| chr20 | 62700001 | 62800000 | 1202 | 1153 | 62750000 | 0.256007 | 0.000626 | 0 |
| chr20 | 62950001 | 63050000 | 9    | 13   | 6.30E+07 | -0.33455 | 1.73E-05 | 0 |
| chr20 | 400001   | 500000   | 1016 | 1041 | 450000   | 0.160893 | 0.0211   | 0 |
| chr20 | 800001   | 900000   | 1049 | 1084 | 850000   | 0.148613 | 0.030283 | 0 |
| chr20 | 1250001  | 1350000  | 1054 | 1096 | 1300000  | 0.13959  | 0.038968 | 0 |
| chr20 | 1550001  | 1650000  | 486  | 617  | 1600000  | -0.14835 | 0.031417 | 0 |
| chr20 | 2400001  | 2500000  | 898  | 934  | 2450000  | 0.139256 | 0.039325 | 0 |
| chr20 | 2450001  | 2550000  | 949  | 973  | 2500000  | 0.159931 | 0.021723 | 0 |
| chr20 | 2950001  | 3050000  | 928  | 964  | 3.00E+06 | 0.141055 | 0.037434 | 0 |
| chr20 | 3100001  | 3200000  | 944  | 972  | 3150000  | 0.153794 | 0.026069 | 0 |

|       |          |          |      |      |          |          |          |   |
|-------|----------|----------|------|------|----------|----------|----------|---|
| chr20 | 3600001  | 3700000  | 1132 | 1183 | 3650000  | 0.132387 | 0.047275 | 0 |
| chr20 | 4700001  | 4800000  | 966  | 998  | 4750000  | 0.148946 | 0.029996 | 0 |
| chr20 | 5050001  | 5150000  | 898  | 912  | 5100000  | 0.173645 | 0.01418  | 0 |
| chr20 | 5450001  | 5550000  | 835  | 860  | 5500000  | 0.153403 | 0.026369 | 0 |
| chr20 | 5500001  | 5600000  | 912  | 937  | 5550000  | 0.156948 | 0.023752 | 0 |
| chr20 | 5550001  | 5650000  | 902  | 917  | 5600000  | 0.172169 | 0.014865 | 0 |
| chr20 | 5600001  | 5700000  | 849  | 874  | 5650000  | 0.154094 | 0.02584  | 0 |
| chr20 | 6300001  | 6400000  | 680  | 863  | 6350000  | -0.14786 | 0.031849 | 0 |
| chr20 | 6350001  | 6450000  | 726  | 937  | 6400000  | -0.17212 | 0.015558 | 0 |
| chr20 | 7000001  | 7100000  | 713  | 897  | 7050000  | -0.13524 | 0.044836 | 0 |
| chr20 | 7150001  | 7250000  | 710  | 892  | 7200000  | -0.13326 | 0.047219 | 0 |
| chr20 | 7250001  | 7350000  | 693  | 892  | 7300000  | -0.16823 | 0.017545 | 0 |
| chr20 | 7300001  | 7400000  | 670  | 868  | 7350000  | -0.17757 | 0.013102 | 0 |
| chr20 | 7450001  | 7550000  | 675  | 865  | 7500000  | -0.16185 | 0.021272 | 0 |
| chr20 | 7900001  | 8000000  | 724  | 935  | 7950000  | -0.17301 | 0.015129 | 0 |
| chr20 | 7950001  | 8050000  | 806  | 1033 | 8.00E+06 | -0.16203 | 0.02116  | 0 |
| chr20 | 8150001  | 8250000  | 699  | 878  | 8200000  | -0.13297 | 0.047584 | 0 |
| chr20 | 8300001  | 8400000  | 676  | 852  | 8350000  | -0.13787 | 0.04183  | 0 |
| chr20 | 8600001  | 8700000  | 759  | 972  | 8650000  | -0.16089 | 0.021885 | 0 |
| chr20 | 9200001  | 9300000  | 829  | 1069 | 9250000  | -0.17085 | 0.01618  | 0 |
| chr20 | 9850001  | 9950000  | 733  | 944  | 9900000  | -0.16901 | 0.017128 | 0 |
| chr20 | 10100001 | 10200000 | 799  | 1004 | 10150000 | -0.13353 | 0.046892 | 0 |
| chr20 | 10700001 | 10800000 | 761  | 981  | 10750000 | -0.17039 | 0.016413 | 0 |
| chr20 | 12100001 | 12200000 | 830  | 863  | 12150000 | 0.139714 | 0.038836 | 0 |
| chr20 | 12600001 | 12700000 | 659  | 831  | 12650000 | -0.13861 | 0.041013 | 0 |
| chr20 | 12650001 | 12750000 | 687  | 881  | 12700000 | -0.16287 | 0.020634 | 0 |
| chr20 | 13050001 | 13150000 | 776  | 1009 | 13100000 | -0.18283 | 0.011058 | 0 |
| chr20 | 13100001 | 13200000 | 799  | 1024 | 13150000 | -0.16199 | 0.021186 | 0 |
| chr20 | 13150001 | 13250000 | 796  | 1030 | 13200000 | -0.17584 | 0.013841 | 0 |
| chr20 | 14550001 | 14650000 | 629  | 804  | 14600000 | -0.15817 | 0.023712 | 0 |
| chr20 | 14600001 | 14700000 | 623  | 794  | 14650000 | -0.15394 | 0.026808 | 0 |
| chr20 | 14650001 | 14750000 | 599  | 767  | 14700000 | -0.16071 | 0.022006 | 0 |
| chr20 | 14800001 | 14900000 | 605  | 761  | 14850000 | -0.135   | 0.045125 | 0 |
| chr20 | 15250001 | 15350000 | 596  | 773  | 15300000 | -0.17919 | 0.012439 | 0 |
| chr20 | 15350001 | 15450000 | 634  | 806  | 15400000 | -0.15033 | 0.029712 | 0 |
| chr20 | 15750001 | 15850000 | 644  | 835  | 15800000 | -0.17875 | 0.012616 | 0 |
| chr20 | 15900001 | 16000000 | 614  | 784  | 15950000 | -0.15665 | 0.024789 | 0 |
| chr20 | 16050001 | 16150000 | 667  | 865  | 16100000 | -0.17905 | 0.012496 | 0 |
| chr20 | 16100001 | 16200000 | 693  | 885  | 16150000 | -0.15686 | 0.02464  | 0 |
| chr20 | 17100001 | 17200000 | 726  | 938  | 17150000 | -0.17366 | 0.014828 | 0 |
| chr20 | 17500001 | 17600000 | 966  | 986  | 17550000 | 0.166399 | 0.017823 | 0 |
| chr20 | 17750001 | 17850000 | 939  | 1192 | 17800000 | -0.14822 | 0.031528 | 0 |
| chr20 | 18450001 | 18550000 | 873  | 881  | 18500000 | 0.182803 | 0.01051  | 0 |
| chr20 | 19250001 | 19350000 | 701  | 894  | 19300000 | -0.1549  | 0.026082 | 0 |
| chr20 | 19350001 | 19450000 | 748  | 952  | 19400000 | -0.15196 | 0.028373 | 0 |
| chr20 | 19450001 | 19550000 | 800  | 1005 | 19500000 | -0.13316 | 0.047344 | 0 |
| chr20 | 19500001 | 19600000 | 792  | 1003 | 19550000 | -0.14479 | 0.034685 | 0 |

|       |          |          |      |      |          |          |          |   |
|-------|----------|----------|------|------|----------|----------|----------|---|
| chr20 | 20100001 | 20200000 | 707  | 891  | 20150000 | -0.13775 | 0.041958 | 0 |
| chr20 | 20150001 | 20250000 | 746  | 970  | 20200000 | -0.18285 | 0.011054 | 0 |
| chr20 | 20400001 | 20500000 | 765  | 971  | 20450000 | -0.14805 | 0.031684 | 0 |
| chr20 | 21100001 | 21200000 | 924  | 936  | 21150000 | 0.177347 | 0.012581 | 0 |
| chr20 | 21750001 | 21850000 | 684  | 872  | 21800000 | -0.15437 | 0.026482 | 0 |
| chr20 | 23100001 | 23200000 | 1046 | 1089 | 23150000 | 0.137842 | 0.040866 | 0 |
| chr20 | 23450001 | 23550000 | 753  | 950  | 23500000 | -0.13931 | 0.040244 | 0 |
| chr20 | 23550001 | 23650000 | 774  | 800  | 23600000 | 0.148297 | 0.030558 | 0 |
| chr20 | 23700001 | 23800000 | 347  | 436  | 23750000 | -0.13343 | 0.047014 | 0 |
| chr20 | 24650001 | 24750000 | 801  | 1037 | 24700000 | -0.17658 | 0.013522 | 0 |
| chr20 | 25150001 | 25250000 | 859  | 891  | 25200000 | 0.143196 | 0.03528  | 0 |
| chr20 | 25350001 | 25450000 | 854  | 870  | 25400000 | 0.169184 | 0.016338 | 0 |
| chr20 | 26150001 | 26250000 | 489  | 635  | 26200000 | -0.18096 | 0.011752 | 0 |
| chr20 | 26200001 | 26300000 | 361  | 458  | 26250000 | -0.14739 | 0.032275 | 0 |
| chr20 | 26300001 | 26400000 | 193  | 197  | 26350000 | 0.166368 | 0.01784  | 0 |
| chr20 | 30050001 | 30150000 | 928  | 950  | 30100000 | 0.16216  | 0.020304 | 0 |
| chr20 | 30250001 | 30350000 | 970  | 1009 | 30300000 | 0.139094 | 0.0395   | 0 |
| chr20 | 30500001 | 30600000 | 1078 | 1128 | 30550000 | 0.130553 | 0.049602 | 0 |
| chr20 | 30600001 | 30700000 | 1007 | 1043 | 30650000 | 0.145288 | 0.033276 | 0 |
| chr20 | 30900001 | 31000000 | 890  | 927  | 30950000 | 0.137199 | 0.041582 | 0 |
| chr20 | 31050001 | 31150000 | 1170 | 1187 | 31100000 | 0.175152 | 0.013509 | 0 |
| chr20 | 31950001 | 32050000 | 824  | 849  | 3.20E+07 | 0.152843 | 0.026803 | 0 |
| chr20 | 32100001 | 32200000 | 833  | 857  | 32150000 | 0.154984 | 0.025173 | 0 |
| chr20 | 32150001 | 32250000 | 926  | 954  | 32200000 | 0.152986 | 0.026691 | 0 |
| chr20 | 32250001 | 32350000 | 966  | 993  | 32300000 | 0.156193 | 0.02429  | 0 |
| chr20 | 32350001 | 32450000 | 1005 | 1036 | 32400000 | 0.152135 | 0.027361 | 0 |
| chr20 | 32600001 | 32700000 | 1093 | 1106 | 32650000 | 0.178905 | 0.011956 | 0 |
| chr20 | 32700001 | 32800000 | 777  | 795  | 32750000 | 0.162923 | 0.019837 | 0 |
| chr20 | 32850001 | 32950000 | 918  | 955  | 32900000 | 0.138956 | 0.039647 | 0 |
| chr20 | 33000001 | 33100000 | 890  | 906  | 33050000 | 0.170257 | 0.015794 | 0 |
| chr20 | 33050001 | 33150000 | 958  | 980  | 33100000 | 0.163207 | 0.019666 | 0 |
| chr20 | 33150001 | 33250000 | 841  | 875  | 33200000 | 0.138786 | 0.039832 | 0 |
| chr20 | 33300001 | 33400000 | 925  | 933  | 33350000 | 0.183539 | 0.010255 | 0 |
| chr20 | 33350001 | 33450000 | 916  | 930  | 33400000 | 0.17408  | 0.013984 | 0 |
| chr20 | 33650001 | 33750000 | 811  | 837  | 33700000 | 0.150437 | 0.028739 | 0 |
| chr20 | 33750001 | 33850000 | 892  | 906  | 33800000 | 0.173496 | 0.014248 | 0 |
| chr20 | 33850001 | 33950000 | 1068 | 1101 | 33900000 | 0.15206  | 0.027421 | 0 |
| chr20 | 33900001 | 34000000 | 935  | 967  | 33950000 | 0.147414 | 0.031336 | 0 |
| chr20 | 34050001 | 34150000 | 1028 | 1067 | 34100000 | 0.142243 | 0.036226 | 0 |
| chr20 | 34450001 | 34550000 | 924  | 935  | 34500000 | 0.17889  | 0.011962 | 0 |
| chr20 | 34850001 | 34950000 | 663  | 690  | 34900000 | 0.138376 | 0.040279 | 0 |
| chr20 | 35150001 | 35250000 | 955  | 966  | 35200000 | 0.179441 | 0.011748 | 0 |
| chr20 | 35400001 | 35500000 | 1028 | 1045 | 35450000 | 0.1723   | 0.014803 | 0 |
| chr20 | 35450001 | 35550000 | 972  | 981  | 35500000 | 0.182666 | 0.010558 | 0 |
| chr20 | 35550001 | 35650000 | 682  | 713  | 35600000 | 0.131833 | 0.047969 | 0 |
| chr20 | 35600001 | 35700000 | 668  | 689  | 35650000 | 0.151307 | 0.028026 | 0 |
| chr20 | 36000001 | 36100000 | 1168 | 1219 | 36050000 | 0.134305 | 0.044935 | 0 |

|       |          |          |      |      |          |          |          |   |
|-------|----------|----------|------|------|----------|----------|----------|---|
| chr20 | 36700001 | 36800000 | 1173 | 1194 | 36750000 | 0.170363 | 0.015742 | 0 |
| chr20 | 37000001 | 37100000 | 935  | 955  | 37050000 | 0.165429 | 0.018367 | 0 |
| chr20 | 37500001 | 37600000 | 1014 | 1042 | 37550000 | 0.156665 | 0.023952 | 0 |
| chr20 | 38050001 | 38150000 | 673  | 869  | 38100000 | -0.17279 | 0.015237 | 0 |
| chr20 | 38250001 | 38350000 | 711  | 904  | 38300000 | -0.15051 | 0.029565 | 0 |
| chr20 | 38300001 | 38400000 | 637  | 830  | 38350000 | -0.18585 | 0.010016 | 0 |
| chr20 | 38450001 | 38550000 | 725  | 925  | 38500000 | -0.15551 | 0.025624 | 0 |
| chr20 | 38500001 | 38600000 | 671  | 865  | 38550000 | -0.17042 | 0.016397 | 0 |
| chr20 | 38550001 | 38650000 | 653  | 820  | 38600000 | -0.13258 | 0.048065 | 0 |
| chr20 | 38850001 | 38950000 | 790  | 1005 | 38900000 | -0.15131 | 0.028904 | 0 |
| chr20 | 41250001 | 41350000 | 693  | 895  | 41300000 | -0.17307 | 0.015102 | 0 |
| chr20 | 41700001 | 41800000 | 723  | 916  | 41750000 | -0.14539 | 0.034113 | 0 |
| chr20 | 42000001 | 42100000 | 840  | 872  | 42050000 | 0.142024 | 0.036446 | 0 |
| chr20 | 42050001 | 42150000 | 871  | 901  | 42100000 | 0.147109 | 0.031608 | 0 |
| chr20 | 43050001 | 43150000 | 1038 | 1053 | 43100000 | 0.175264 | 0.01346  | 0 |
| chr20 | 43200001 | 43300000 | 1075 | 1123 | 43250000 | 0.132942 | 0.046588 | 0 |
| chr20 | 43250001 | 43350000 | 1040 | 1057 | 43300000 | 0.172571 | 0.014676 | 0 |
| chr20 | 43350001 | 43450000 | 1224 | 1252 | 43400000 | 0.163332 | 0.019591 | 0 |
| chr20 | 43500001 | 43600000 | 1025 | 1041 | 43550000 | 0.173617 | 0.014193 | 0 |
| chr20 | 43550001 | 43650000 | 1017 | 1061 | 43600000 | 0.134858 | 0.044278 | 0 |
| chr20 | 44000001 | 44100000 | 1055 | 1082 | 44050000 | 0.159506 | 0.022003 | 0 |
| chr20 | 44550001 | 44650000 | 1054 | 1077 | 44600000 | 0.16482  | 0.018715 | 0 |
| chr20 | 44600001 | 44700000 | 1146 | 1178 | 44650000 | 0.156231 | 0.024263 | 0 |
| chr20 | 47700001 | 47800000 | 876  | 895  | 47750000 | 0.165006 | 0.018608 | 0 |
| chr20 | 47850001 | 47950000 | 972  | 990  | 47900000 | 0.169491 | 0.016181 | 0 |
| chr20 | 48500001 | 48600000 | 955  | 983  | 48550000 | 0.154272 | 0.025705 | 0 |
| chr20 | 48600001 | 48700000 | 1000 | 1035 | 48650000 | 0.146332 | 0.032311 | 0 |
| chr20 | 48650001 | 48750000 | 1053 | 1065 | 48700000 | 0.179615 | 0.011681 | 0 |
| chr20 | 48850001 | 48950000 | 1238 | 1260 | 48900000 | 0.170551 | 0.015649 | 0 |
| chr20 | 49200001 | 49300000 | 965  | 993  | 49250000 | 0.154698 | 0.025386 | 0 |
| chr20 | 49250001 | 49350000 | 921  | 941  | 49300000 | 0.164969 | 0.018629 | 0 |
| chr20 | 49600001 | 49700000 | 1002 | 1039 | 49650000 | 0.14365  | 0.034837 | 0 |
| chr20 | 50000001 | 50100000 | 1053 | 1070 | 50050000 | 0.172858 | 0.014542 | 0 |
| chr20 | 50050001 | 50150000 | 1032 | 1052 | 50100000 | 0.168271 | 0.016812 | 0 |
| chr20 | 50500001 | 50600000 | 724  | 749  | 50550000 | 0.146987 | 0.031717 | 0 |
| chr20 | 50700001 | 50800000 | 747  | 950  | 50750000 | -0.15086 | 0.029277 | 0 |
| chr20 | 50800001 | 50900000 | 841  | 860  | 50850000 | 0.163732 | 0.019352 | 0 |
| chr20 | 51350001 | 51450000 | 720  | 930  | 51400000 | -0.17327 | 0.015008 | 0 |
| chr20 | 52200001 | 52300000 | 651  | 675  | 52250000 | 0.143733 | 0.034756 | 0 |
| chr20 | 52550001 | 52650000 | 800  | 1012 | 52600000 | -0.14317 | 0.036252 | 0 |
| chr20 | 52850001 | 52950000 | 719  | 933  | 52900000 | -0.17992 | 0.012151 | 0 |
| chr20 | 53350001 | 53450000 | 690  | 713  | 53400000 | 0.148657 | 0.030245 | 0 |
| chr20 | 53550001 | 53650000 | 614  | 800  | 53600000 | -0.1858  | 0.010034 | 0 |
| chr20 | 53600001 | 53700000 | 592  | 748  | 53650000 | -0.14148 | 0.037964 | 0 |
| chr20 | 53950001 | 54050000 | 653  | 822  | 5.40E+07 | -0.13609 | 0.043844 | 0 |
| chr20 | 54000001 | 54100000 | 684  | 868  | 54050000 | -0.14774 | 0.031962 | 0 |
| chr20 | 54250001 | 54350000 | 647  | 833  | 54300000 | -0.16859 | 0.017351 | 0 |



|       |          |          |      |      |          |          |          |   |
|-------|----------|----------|------|------|----------|----------|----------|---|
| chr20 | 54350001 | 54450000 | 571  | 739  | 54400000 | -0.17612 | 0.013719 | 0 |
| chr20 | 54400001 | 54500000 | 551  | 707  | 54450000 | -0.16369 | 0.02013  | 0 |
| chr20 | 54550001 | 54650000 | 665  | 856  | 54600000 | -0.16829 | 0.017509 | 0 |
| chr20 | 55200001 | 55300000 | 825  | 863  | 55250000 | 0.130997 | 0.049031 | 0 |
| chr20 | 55300001 | 55400000 | 934  | 972  | 55350000 | 0.138429 | 0.04022  | 0 |
| chr20 | 55550001 | 55650000 | 1008 | 1027 | 55600000 | 0.169022 | 0.016421 | 0 |
| chr20 | 55600001 | 55700000 | 1036 | 1084 | 55650000 | 0.130622 | 0.049513 | 0 |
| chr20 | 55700001 | 55800000 | 1087 | 1112 | 55750000 | 0.163158 | 0.019695 | 0 |
| chr20 | 55750001 | 55850000 | 1084 | 1126 | 55800000 | 0.141121 | 0.037366 | 0 |
| chr20 | 55900001 | 56000000 | 1072 | 1116 | 55950000 | 0.137931 | 0.040767 | 0 |
| chr20 | 56100001 | 56200000 | 1059 | 1092 | 56150000 | 0.151693 | 0.027715 | 0 |
| chr20 | 56900001 | 57000000 | 936  | 973  | 56950000 | 0.140032 | 0.0385   | 0 |
| chr20 | 57350001 | 57450000 | 1080 | 1102 | 57400000 | 0.16687  | 0.017564 | 0 |
| chr20 | 57400001 | 57500000 | 1085 | 1103 | 57450000 | 0.172225 | 0.014838 | 0 |
| chr20 | 57450001 | 57550000 | 946  | 989  | 57500000 | 0.131833 | 0.047969 | 0 |
| chr20 | 57500001 | 57600000 | 964  | 983  | 57550000 | 0.167805 | 0.017059 | 0 |
| chr20 | 57600001 | 57700000 | 972  | 1009 | 57650000 | 0.142065 | 0.036405 | 0 |
| chr20 | 59200001 | 59300000 | 695  | 874  | 59250000 | -0.13466 | 0.04553  | 0 |
| chr20 | 60300001 | 60400000 | 1076 | 1118 | 60350000 | 0.140721 | 0.037779 | 0 |
| chr20 | 60350001 | 60450000 | 1136 | 1185 | 60400000 | 0.135039 | 0.044065 | 0 |
| chr20 | 60750001 | 60850000 | 1188 | 1212 | 60800000 | 0.167108 | 0.017434 | 0 |
| chr20 | 61000001 | 61100000 | 1220 | 1264 | 61050000 | 0.144848 | 0.033689 | 0 |
| chr20 | 61100001 | 61200000 | 765  | 785  | 61150000 | 0.15873  | 0.022521 | 0 |
| chr20 | 61300001 | 61400000 | 1267 | 1285 | 61350000 | 0.175611 | 0.01331  | 0 |
| chr20 | 61350001 | 61450000 | 1217 | 1262 | 61400000 | 0.14358  | 0.034905 | 0 |
| chr20 | 61650001 | 61750000 | 1185 | 1201 | 61700000 | 0.176614 | 0.012885 | 0 |
| chr20 | 61700001 | 61800000 | 1171 | 1212 | 61750000 | 0.146314 | 0.032327 | 0 |
| chr20 | 61750001 | 61850000 | 1224 | 1246 | 61800000 | 0.170263 | 0.015792 | 0 |
| chr20 | 61900001 | 62000000 | 1286 | 1303 | 61950000 | 0.177017 | 0.012717 | 0 |
| chr20 | 61950001 | 62050000 | 1325 | 1378 | 6.20E+07 | 0.13938  | 0.039193 | 0 |
| chr20 | 62000001 | 62100000 | 1318 | 1338 | 62050000 | 0.174235 | 0.013914 | 0 |
| chr20 | 62200001 | 62300000 | 982  | 1011 | 62250000 | 0.153975 | 0.025931 | 0 |
| chr21 | 9500001  | 9600000  | 102  | 140  | 9550000  | -0.26089 | 0.00058  | 0 |
| chr21 | 9650001  | 9750000  | 114  | 107  | 9700000  | 0.287386 | 0.000148 | 0 |
| chr21 | 9700001  | 9800000  | 22   | 17   | 9750000  | 0.567932 | 1.02E-12 | 0 |
| chr21 | 9950001  | 10050000 | 64   | 64   | 1.00E+07 | 0.195963 | 0.006694 | 0 |
| chr21 | 10000001 | 10100000 | 96   | 80   | 10050000 | 0.458997 | 5.01E-09 | 0 |
| chr21 | 10100001 | 10200000 | 20   | 35   | 10150000 | -0.61139 | 1.08E-13 | 0 |
| chr21 | 10150001 | 10250000 | 10   | 14   | 10200000 | -0.28946 | 0.000161 | 0 |
| chr21 | 10200001 | 10300000 | 6    | 3    | 10250000 | 1.195963 | 1.84E-42 | 0 |
| chr21 | 11000001 | 11100000 | 644  | 844  | 11050000 | -0.19422 | 0.007566 | 0 |
| chr21 | 14450001 | 14550000 | 2    | 1    | 14500000 | 1.195963 | 1.84E-42 | 0 |
| chr21 | 14500001 | 14600000 | 17   | 6    | 14550000 | 1.698463 | 5.86E-69 | 0 |
| chr21 | 14550001 | 14650000 | 47   | 34   | 14600000 | 0.663089 | 2.04E-16 | 0 |
| chr21 | 14750001 | 14850000 | 49   | 69   | 14800000 | -0.29785 | 0.000109 | 0 |
| chr21 | 14900001 | 15000000 | 39   | 51   | 14950000 | -0.19106 | 0.008421 | 0 |
| chr21 | 14950001 | 15050000 | 36   | 49   | 1.50E+07 | -0.24882 | 0.000965 | 0 |

|       |          |          |     |     |          |          |          |   |
|-------|----------|----------|-----|-----|----------|----------|----------|---|
| chr21 | 15000001 | 15100000 | 59  | 84  | 15050000 | -0.31371 | 5.02E-05 | 0 |
| chr21 | 15050001 | 15150000 | 69  | 103 | 15100000 | -0.38201 | 1.25E-06 | 0 |
| chr21 | 15450001 | 15550000 | 396 | 535 | 15500000 | -0.23808 | 0.001493 | 0 |
| chr21 | 15500001 | 15600000 | 363 | 535 | 15550000 | -0.36361 | 3.58E-06 | 0 |
| chr21 | 15550001 | 15650000 | 418 | 550 | 15600000 | -0.19997 | 0.006206 | 0 |
| chr21 | 15800001 | 15900000 | 428 | 561 | 15850000 | -0.19443 | 0.007513 | 0 |
| chr21 | 15900001 | 16000000 | 403 | 530 | 15950000 | -0.19925 | 0.006363 | 0 |
| chr21 | 15950001 | 16050000 | 371 | 540 | 1.60E+07 | -0.34558 | 9.64E-06 | 0 |
| chr21 | 16000001 | 16100000 | 430 | 580 | 16050000 | -0.23575 | 0.001637 | 0 |
| chr21 | 16300001 | 16400000 | 457 | 637 | 16350000 | -0.28314 | 0.000216 | 0 |
| chr21 | 18050001 | 18150000 | 399 | 528 | 18100000 | -0.20819 | 0.004639 | 0 |
| chr21 | 18250001 | 18350000 | 407 | 531 | 18300000 | -0.18772 | 0.009416 | 0 |
| chr21 | 18300001 | 18400000 | 448 | 613 | 18350000 | -0.25643 | 0.000702 | 0 |
| chr21 | 19100001 | 19200000 | 526 | 514 | 19150000 | 0.229257 | 0.001916 | 0 |
| chr21 | 19250001 | 19350000 | 399 | 541 | 19300000 | -0.24328 | 0.001211 | 0 |
| chr21 | 19300001 | 19400000 | 392 | 539 | 19350000 | -0.26347 | 0.000519 | 0 |
| chr21 | 19450001 | 19550000 | 419 | 562 | 19500000 | -0.22766 | 0.002247 | 0 |
| chr21 | 19600001 | 19700000 | 399 | 526 | 19650000 | -0.20271 | 0.005637 | 0 |
| chr21 | 19650001 | 19750000 | 408 | 536 | 19700000 | -0.1977  | 0.006714 | 0 |
| chr21 | 20150001 | 20250000 | 371 | 497 | 20200000 | -0.22586 | 0.002407 | 0 |
| chr21 | 20200001 | 20300000 | 385 | 525 | 20250000 | -0.2515  | 0.000863 | 0 |
| chr21 | 20250001 | 20350000 | 407 | 545 | 20300000 | -0.22526 | 0.002463 | 0 |
| chr21 | 20550001 | 20650000 | 390 | 539 | 20600000 | -0.27085 | 0.000376 | 0 |
| chr21 | 20600001 | 20700000 | 404 | 555 | 20650000 | -0.26217 | 0.000549 | 0 |
| chr21 | 20900001 | 21000000 | 371 | 502 | 20950000 | -0.24031 | 0.001365 | 0 |
| chr21 | 21000001 | 21100000 | 370 | 498 | 21050000 | -0.23266 | 0.00185  | 0 |
| chr21 | 21050001 | 21150000 | 362 | 489 | 21100000 | -0.23788 | 0.001505 | 0 |
| chr21 | 21300001 | 21400000 | 345 | 484 | 21350000 | -0.29245 | 0.00014  | 0 |
| chr21 | 21350001 | 21450000 | 356 | 471 | 21400000 | -0.20789 | 0.00469  | 0 |
| chr21 | 21500001 | 21600000 | 376 | 499 | 21550000 | -0.21234 | 0.003991 | 0 |
| chr21 | 21800001 | 21900000 | 370 | 490 | 21850000 | -0.20929 | 0.004458 | 0 |
| chr21 | 21850001 | 21950000 | 387 | 541 | 21900000 | -0.28733 | 0.000178 | 0 |
| chr21 | 22300001 | 22400000 | 408 | 535 | 22350000 | -0.19501 | 0.007365 | 0 |
| chr21 | 22350001 | 22450000 | 399 | 540 | 22400000 | -0.24061 | 0.001349 | 0 |
| chr21 | 22400001 | 22500000 | 371 | 500 | 22450000 | -0.23455 | 0.001717 | 0 |
| chr21 | 22550001 | 22650000 | 404 | 539 | 22600000 | -0.21997 | 0.00301  | 0 |
| chr21 | 22600001 | 22700000 | 387 | 542 | 22650000 | -0.29    | 0.000157 | 0 |
| chr21 | 22800001 | 22900000 | 376 | 494 | 22850000 | -0.19782 | 0.006687 | 0 |
| chr21 | 22850001 | 22950000 | 381 | 510 | 22900000 | -0.22474 | 0.002512 | 0 |
| chr21 | 23000001 | 23100000 | 379 | 507 | 23050000 | -0.22382 | 0.002602 | 0 |
| chr21 | 23050001 | 23150000 | 373 | 491 | 23100000 | -0.20058 | 0.006074 | 0 |
| chr21 | 23150001 | 23250000 | 392 | 529 | 23200000 | -0.23645 | 0.001593 | 0 |
| chr21 | 23850001 | 23950000 | 351 | 459 | 23900000 | -0.19106 | 0.008421 | 0 |
| chr21 | 23950001 | 24050000 | 366 | 496 | 2.40E+07 | -0.24253 | 0.001248 | 0 |
| chr21 | 24000001 | 24100000 | 375 | 493 | 24050000 | -0.19873 | 0.006478 | 0 |
| chr21 | 24050001 | 24150000 | 377 | 495 | 24100000 | -0.1969  | 0.006902 | 0 |
| chr21 | 24100001 | 24200000 | 371 | 507 | 24150000 | -0.2546  | 0.000758 | 0 |

|       |          |          |     |     |          |          |          |   |
|-------|----------|----------|-----|-----|----------|----------|----------|---|
| chr21 | 24150001 | 24250000 | 373 | 512 | 24200000 | -0.26101 | 0.000577 | 0 |
| chr21 | 24300001 | 24400000 | 378 | 513 | 24350000 | -0.24461 | 0.001147 | 0 |
| chr21 | 24350001 | 24450000 | 372 | 493 | 24400000 | -0.21032 | 0.004295 | 0 |
| chr21 | 24500001 | 24600000 | 360 | 485 | 24550000 | -0.23402 | 0.001753 | 0 |
| chr21 | 24650001 | 24750000 | 378 | 503 | 24700000 | -0.21621 | 0.003462 | 0 |
| chr21 | 25100001 | 25200000 | 387 | 506 | 25150000 | -0.19084 | 0.008483 | 0 |
| chr21 | 25150001 | 25250000 | 369 | 520 | 25200000 | -0.29893 | 0.000103 | 0 |
| chr21 | 25300001 | 25400000 | 376 | 526 | 25350000 | -0.28837 | 0.00017  | 0 |
| chr21 | 25800001 | 25900000 | 373 | 487 | 25850000 | -0.18878 | 0.009089 | 0 |
| chr21 | 26350001 | 26450000 | 396 | 536 | 26400000 | -0.24077 | 0.00134  | 0 |
| chr21 | 29050001 | 29150000 | 434 | 606 | 29100000 | -0.28566 | 0.000193 | 0 |
| chr21 | 29200001 | 29300000 | 149 | 200 | 29250000 | -0.22872 | 0.002156 | 0 |
| chr21 | 29250001 | 29350000 | 110 | 153 | 29300000 | -0.28007 | 0.000249 | 0 |
| chr21 | 29300001 | 29400000 | 100 | 155 | 29350000 | -0.43631 | 4.46E-08 | 0 |
| chr21 | 29350001 | 29450000 | 124 | 193 | 29400000 | -0.4423  | 3.02E-08 | 0 |
| chr21 | 29650001 | 29750000 | 420 | 553 | 29700000 | -0.20093 | 0.006002 | 0 |
| chr21 | 30800001 | 30900000 | 502 | 661 | 30850000 | -0.201   | 0.005986 | 0 |
| chr21 | 31800001 | 31900000 | 426 | 568 | 31850000 | -0.21907 | 0.003112 | 0 |
| chr21 | 32700001 | 32800000 | 491 | 642 | 32750000 | -0.19089 | 0.00847  | 0 |
| chr21 | 32750001 | 32850000 | 444 | 609 | 32800000 | -0.25992 | 0.000605 | 0 |
| chr21 | 32800001 | 32900000 | 444 | 611 | 32850000 | -0.26465 | 0.000493 | 0 |
| chr21 | 32950001 | 33050000 | 569 | 552 | 3.30E+07 | 0.239723 | 0.001252 | 0 |
| chr21 | 33100001 | 33200000 | 561 | 555 | 33150000 | 0.211476 | 0.003811 | 0 |
| chr21 | 33650001 | 33750000 | 704 | 709 | 33700000 | 0.185753 | 0.009519 | 0 |
| chr21 | 33700001 | 33800000 | 735 | 717 | 33750000 | 0.231734 | 0.001735 | 0 |
| chr21 | 33750001 | 33850000 | 620 | 606 | 33800000 | 0.228913 | 0.001942 | 0 |
| chr21 | 33900001 | 34000000 | 630 | 602 | 33950000 | 0.261551 | 0.00049  | 0 |
| chr21 | 35700001 | 35800000 | 669 | 654 | 35750000 | 0.228679 | 0.001961 | 0 |
| chr21 | 36200001 | 36300000 | 726 | 716 | 36250000 | 0.215973 | 0.003216 | 0 |
| chr21 | 37450001 | 37550000 | 568 | 568 | 37500000 | 0.195963 | 0.006694 | 0 |
| chr21 | 37500001 | 37600000 | 586 | 589 | 37550000 | 0.188596 | 0.008643 | 0 |
| chr21 | 37750001 | 37850000 | 587 | 573 | 37800000 | 0.230788 | 0.001802 | 0 |
| chr21 | 37800001 | 37900000 | 617 | 607 | 37850000 | 0.219537 | 0.002806 | 0 |
| chr21 | 40550001 | 40650000 | 631 | 628 | 40600000 | 0.202838 | 0.005237 | 0 |
| chr21 | 42500001 | 42600000 | 694 | 682 | 42550000 | 0.221127 | 0.002639 | 0 |
| chr21 | 42550001 | 42650000 | 723 | 647 | 42600000 | 0.356193 | 3.86E-06 | 0 |
| chr21 | 42600001 | 42700000 | 665 | 666 | 42650000 | 0.193795 | 0.007222 | 0 |
| chr21 | 42900001 | 43000000 | 295 | 403 | 42950000 | -0.2541  | 0.000774 | 0 |
| chr21 | 43000001 | 43100000 | 683 | 669 | 43050000 | 0.225842 | 0.002194 | 0 |
| chr21 | 43100001 | 43200000 | 758 | 762 | 43150000 | 0.18837  | 0.00871  | 0 |
| chr21 | 43150001 | 43250000 | 789 | 722 | 43200000 | 0.323989 | 2.31E-05 | 0 |
| chr21 | 43200001 | 43300000 | 693 | 679 | 43250000 | 0.225407 | 0.002232 | 0 |
| chr21 | 43500001 | 43600000 | 762 | 744 | 43550000 | 0.230451 | 0.001827 | 0 |
| chr21 | 44250001 | 44350000 | 662 | 665 | 44300000 | 0.18944  | 0.008397 | 0 |
| chr21 | 44300001 | 44400000 | 507 | 504 | 44350000 | 0.204525 | 0.004926 | 0 |
| chr21 | 44450001 | 44550000 | 702 | 694 | 44500000 | 0.212498 | 0.003668 | 0 |
| chr21 | 44500001 | 44600000 | 713 | 698 | 44550000 | 0.226638 | 0.002126 | 0 |

|       |          |          |      |      |          |          |          |   |
|-------|----------|----------|------|------|----------|----------|----------|---|
| chr21 | 44550001 | 44650000 | 665  | 657  | 44600000 | 0.213424 | 0.003542 | 0 |
| chr21 | 44750001 | 44850000 | 872  | 829  | 44800000 | 0.268919 | 0.000351 | 0 |
| chr21 | 44800001 | 44900000 | 827  | 775  | 44850000 | 0.289654 | 0.000133 | 0 |
| chr21 | 44850001 | 44950000 | 837  | 796  | 44900000 | 0.268422 | 0.00036  | 0 |
| chr21 | 45100001 | 45200000 | 832  | 757  | 45150000 | 0.332253 | 1.48E-05 | 0 |
| chr21 | 45150001 | 45250000 | 885  | 815  | 45200000 | 0.31484  | 3.74E-05 | 0 |
| chr21 | 45200001 | 45300000 | 755  | 757  | 45250000 | 0.192146 | 0.007649 | 0 |
| chr21 | 45300001 | 45400000 | 767  | 773  | 45350000 | 0.184721 | 0.009856 | 0 |
| chr21 | 45450001 | 45550000 | 776  | 754  | 45500000 | 0.237455 | 0.001374 | 0 |
| chr21 | 45500001 | 45600000 | 857  | 813  | 45550000 | 0.272003 | 0.000305 | 0 |
| chr21 | 45600001 | 45700000 | 764  | 755  | 45650000 | 0.213059 | 0.003591 | 0 |
| chr21 | 45650001 | 45750000 | 846  | 807  | 45700000 | 0.264052 | 0.000438 | 0 |
| chr21 | 46150001 | 46250000 | 793  | 779  | 46200000 | 0.221661 | 0.002584 | 0 |
| chr21 | 46200001 | 46300000 | 773  | 733  | 46250000 | 0.272618 | 0.000297 | 0 |
| chr21 | 46250001 | 46350000 | 795  | 783  | 46300000 | 0.217906 | 0.002987 | 0 |
| chr21 | 46300001 | 46400000 | 825  | 823  | 46350000 | 0.199465 | 0.005912 | 0 |
| chr21 | 46450001 | 46550000 | 881  | 848  | 46500000 | 0.251041 | 0.000776 | 0 |
| chr21 | 46500001 | 46600000 | 835  | 797  | 46550000 | 0.26316  | 0.000456 | 0 |
| chr21 | 46550001 | 46650000 | 789  | 761  | 46600000 | 0.248092 | 0.000881 | 0 |
| chr21 | 46650001 | 46750000 | 783  | 769  | 46700000 | 0.221992 | 0.002551 | 0 |
| chr21 | 46700001 | 46800000 | 854  | 835  | 46750000 | 0.228423 | 0.001981 | 0 |
| chr21 | 46750001 | 46850000 | 848  | 826  | 46800000 | 0.233886 | 0.00159  | 0 |
| chr21 | 46800001 | 46900000 | 907  | 824  | 46850000 | 0.334421 | 1.31E-05 | 0 |
| chr21 | 46850001 | 46950000 | 891  | 840  | 46900000 | 0.280999 | 0.000201 | 0 |
| chr21 | 46900001 | 47000000 | 823  | 827  | 46950000 | 0.188968 | 0.008534 | 0 |
| chr21 | 47350001 | 47450000 | 741  | 722  | 47400000 | 0.233438 | 0.001619 | 0 |
| chr21 | 47550001 | 47650000 | 692  | 681  | 47600000 | 0.21908  | 0.002856 | 0 |
| chr21 | 47600001 | 47700000 | 701  | 667  | 47650000 | 0.267691 | 0.000372 | 0 |
| chr21 | 47650001 | 47750000 | 662  | 621  | 47700000 | 0.288201 | 0.000142 | 0 |
| chr21 | 47800001 | 47900000 | 660  | 636  | 47850000 | 0.249402 | 0.000833 | 0 |
| chr21 | 47850001 | 47950000 | 667  | 616  | 47900000 | 0.310719 | 4.62E-05 | 0 |
| chr21 | 9400001  | 9500000  | 195  | 204  | 9450000  | 0.130868 | 0.049196 | 0 |
| chr21 | 9600001  | 9700000  | 100  | 102  | 9650000  | 0.167394 | 0.01728  | 0 |
| chr21 | 9850001  | 9950000  | 314  | 321  | 9900000  | 0.164154 | 0.019103 | 0 |
| chr21 | 10050001 | 10150000 | 69   | 70   | 10100000 | 0.175204 | 0.013486 | 0 |
| chr21 | 10300001 | 10400000 | 30   | 31   | 10350000 | 0.148657 | 0.030245 | 0 |
| chr21 | 10550001 | 10650000 | 97   | 98   | 10600000 | 0.181166 | 0.011098 | 0 |
| chr21 | 10900001 | 11000000 | 151  | 190  | 10950000 | -0.13549 | 0.044548 | 0 |
| chr21 | 11050001 | 11150000 | 1302 | 1642 | 11100000 | -0.13876 | 0.040844 | 0 |
| chr21 | 14600001 | 14700000 | 54   | 56   | 14650000 | 0.143496 | 0.034987 | 0 |
| chr21 | 15100001 | 15200000 | 71   | 92   | 15150000 | -0.17785 | 0.012985 | 0 |
| chr21 | 15200001 | 15300000 | 79   | 80   | 15250000 | 0.177816 | 0.01239  | 0 |
| chr21 | 15300001 | 15400000 | 73   | 75   | 15350000 | 0.156969 | 0.023737 | 0 |
| chr21 | 15850001 | 15950000 | 432  | 555  | 15900000 | -0.16549 | 0.019067 | 0 |
| chr21 | 16250001 | 16350000 | 442  | 558  | 16300000 | -0.14026 | 0.039239 | 0 |
| chr21 | 16450001 | 16550000 | 500  | 650  | 16500000 | -0.18255 | 0.011161 | 0 |
| chr21 | 17400001 | 17500000 | 530  | 680  | 17450000 | -0.16358 | 0.0202   | 0 |

|       |          |          |     |     |          |          |          |   |
|-------|----------|----------|-----|-----|----------|----------|----------|---|
| chr21 | 18800001 | 18900000 | 508 | 514 | 18850000 | 0.179023 | 0.01191  | 0 |
| chr21 | 19150001 | 19250000 | 599 | 604 | 19200000 | 0.18397  | 0.010108 | 0 |
| chr21 | 20100001 | 20200000 | 387 | 498 | 20150000 | -0.16785 | 0.017748 | 0 |
| chr21 | 20400001 | 20500000 | 383 | 485 | 20450000 | -0.14468 | 0.034789 | 0 |
| chr21 | 20850001 | 20950000 | 416 | 526 | 20900000 | -0.14252 | 0.036909 | 0 |
| chr21 | 20950001 | 21050000 | 365 | 468 | 2.10E+07 | -0.16265 | 0.02077  | 0 |
| chr21 | 21100001 | 21200000 | 350 | 443 | 21150000 | -0.14399 | 0.035453 | 0 |
| chr21 | 21400001 | 21500000 | 344 | 432 | 21450000 | -0.13266 | 0.047963 | 0 |
| chr21 | 21450001 | 21550000 | 368 | 469 | 21500000 | -0.15392 | 0.026827 | 0 |
| chr21 | 21700001 | 21800000 | 389 | 494 | 21750000 | -0.14878 | 0.031043 | 0 |
| chr21 | 21900001 | 22000000 | 389 | 499 | 21950000 | -0.16331 | 0.020365 | 0 |
| chr21 | 22450001 | 22550000 | 376 | 472 | 22500000 | -0.13209 | 0.048675 | 0 |
| chr21 | 22500001 | 22600000 | 400 | 505 | 22550000 | -0.14032 | 0.03917  | 0 |
| chr21 | 22650001 | 22750000 | 381 | 495 | 22700000 | -0.18167 | 0.011482 | 0 |
| chr21 | 22750001 | 22850000 | 385 | 499 | 22800000 | -0.17822 | 0.012834 | 0 |
| chr21 | 22900001 | 23000000 | 416 | 532 | 22950000 | -0.15888 | 0.023225 | 0 |
| chr21 | 23100001 | 23200000 | 387 | 494 | 23150000 | -0.15621 | 0.025106 | 0 |
| chr21 | 23200001 | 23300000 | 416 | 522 | 23250000 | -0.1315  | 0.049419 | 0 |
| chr21 | 23300001 | 23400000 | 396 | 510 | 23350000 | -0.16903 | 0.017115 | 0 |
| chr21 | 23500001 | 23600000 | 398 | 500 | 23550000 | -0.1332  | 0.047299 | 0 |
| chr21 | 23550001 | 23650000 | 388 | 501 | 23600000 | -0.17279 | 0.015234 | 0 |
| chr21 | 23600001 | 23700000 | 417 | 532 | 23650000 | -0.15542 | 0.025694 | 0 |
| chr21 | 23800001 | 23900000 | 354 | 445 | 23850000 | -0.13409 | 0.046207 | 0 |
| chr21 | 23900001 | 24000000 | 374 | 481 | 23950000 | -0.16704 | 0.018195 | 0 |
| chr21 | 24600001 | 24700000 | 369 | 480 | 24650000 | -0.18345 | 0.010838 | 0 |
| chr21 | 24700001 | 24800000 | 384 | 500 | 24750000 | -0.18486 | 0.010349 | 0 |
| chr21 | 25000001 | 25100000 | 369 | 469 | 25050000 | -0.15    | 0.02999  | 0 |
| chr21 | 25250001 | 25350000 | 412 | 524 | 25300000 | -0.15096 | 0.029191 | 0 |
| chr21 | 25350001 | 25450000 | 393 | 495 | 25400000 | -0.13694 | 0.042877 | 0 |
| chr21 | 25400001 | 25500000 | 382 | 489 | 25450000 | -0.1603  | 0.022274 | 0 |
| chr21 | 25450001 | 25550000 | 419 | 535 | 25500000 | -0.15663 | 0.024808 | 0 |
| chr21 | 25850001 | 25950000 | 379 | 487 | 25900000 | -0.16576 | 0.018913 | 0 |
| chr21 | 26100001 | 26200000 | 408 | 514 | 26150000 | -0.13724 | 0.042537 | 0 |
| chr21 | 26200001 | 26300000 | 376 | 472 | 26250000 | -0.13209 | 0.048675 | 0 |
| chr21 | 26300001 | 26400000 | 395 | 500 | 26350000 | -0.14411 | 0.035333 | 0 |
| chr21 | 26600001 | 26700000 | 417 | 536 | 26650000 | -0.16622 | 0.01865  | 0 |
| chr21 | 27450001 | 27550000 | 623 | 643 | 27500000 | 0.150376 | 0.028789 | 0 |
| chr21 | 27500001 | 27600000 | 573 | 594 | 27550000 | 0.144035 | 0.034464 | 0 |
| chr21 | 27800001 | 27900000 | 483 | 610 | 27850000 | -0.14082 | 0.038643 | 0 |
| chr21 | 28550001 | 28650000 | 510 | 653 | 28600000 | -0.16062 | 0.022061 | 0 |
| chr21 | 28600001 | 28700000 | 491 | 616 | 28650000 | -0.13124 | 0.04975  | 0 |
| chr21 | 28650001 | 28750000 | 444 | 562 | 28700000 | -0.14405 | 0.035396 | 0 |
| chr21 | 28700001 | 28800000 | 449 | 576 | 28750000 | -0.16339 | 0.020314 | 0 |
| chr21 | 28750001 | 28850000 | 452 | 583 | 28800000 | -0.17121 | 0.016003 | 0 |
| chr21 | 29000001 | 29100000 | 461 | 593 | 29050000 | -0.1673  | 0.018047 | 0 |
| chr21 | 29400001 | 29500000 | 289 | 368 | 29450000 | -0.15267 | 0.027802 | 0 |
| chr21 | 29700001 | 29800000 | 416 | 542 | 29750000 | -0.18575 | 0.010051 | 0 |

|       |          |          |     |     |          |          |          |   |
|-------|----------|----------|-----|-----|----------|----------|----------|---|
| chr21 | 30200001 | 30300000 | 577 | 588 | 30250000 | 0.168718 | 0.016579 | 0 |
| chr21 | 30250001 | 30350000 | 656 | 666 | 30300000 | 0.174137 | 0.013958 | 0 |
| chr21 | 30300001 | 30400000 | 616 | 630 | 30350000 | 0.163542 | 0.019465 | 0 |
| chr21 | 30450001 | 30550000 | 612 | 636 | 30500000 | 0.140468 | 0.038042 | 0 |
| chr21 | 31000001 | 31100000 | 533 | 675 | 31050000 | -0.14479 | 0.034682 | 0 |
| chr21 | 31250001 | 31350000 | 486 | 611 | 31300000 | -0.13425 | 0.046014 | 0 |
| chr21 | 31950001 | 32050000 | 425 | 535 | 3.20E+07 | -0.13611 | 0.04382  | 0 |
| chr21 | 32000001 | 32100000 | 425 | 537 | 32050000 | -0.1415  | 0.037946 | 0 |
| chr21 | 32100001 | 32200000 | 430 | 544 | 32150000 | -0.14331 | 0.036121 | 0 |
| chr21 | 32300001 | 32400000 | 457 | 575 | 32350000 | -0.1354  | 0.044646 | 0 |
| chr21 | 32350001 | 32450000 | 449 | 574 | 32400000 | -0.15837 | 0.023574 | 0 |
| chr21 | 32850001 | 32950000 | 474 | 613 | 32900000 | -0.17504 | 0.014198 | 0 |
| chr21 | 33300001 | 33400000 | 628 | 649 | 33350000 | 0.148509 | 0.030373 | 0 |
| chr21 | 34050001 | 34150000 | 649 | 665 | 34100000 | 0.160827 | 0.021143 | 0 |
| chr21 | 34300001 | 34400000 | 661 | 687 | 34350000 | 0.140303 | 0.038215 | 0 |
| chr21 | 34900001 | 35000000 | 859 | 890 | 34950000 | 0.144816 | 0.03372  | 0 |
| chr21 | 35050001 | 35150000 | 601 | 624 | 35100000 | 0.141782 | 0.036691 | 0 |
| chr21 | 35200001 | 35300000 | 633 | 657 | 35250000 | 0.142275 | 0.036194 | 0 |
| chr21 | 35400001 | 35500000 | 684 | 712 | 35450000 | 0.138082 | 0.040601 | 0 |
| chr21 | 35750001 | 35850000 | 645 | 655 | 35800000 | 0.173767 | 0.014125 | 0 |
| chr21 | 36150001 | 36250000 | 777 | 785 | 36200000 | 0.181185 | 0.011091 | 0 |
| chr21 | 36350001 | 36450000 | 660 | 688 | 36400000 | 0.13602  | 0.042922 | 0 |
| chr21 | 36500001 | 36600000 | 527 | 680 | 36550000 | -0.17177 | 0.015728 | 0 |
| chr21 | 38650001 | 38750000 | 601 | 627 | 38700000 | 0.134863 | 0.044273 | 0 |
| chr21 | 38700001 | 38800000 | 644 | 653 | 38750000 | 0.175941 | 0.013169 | 0 |
| chr21 | 38750001 | 38850000 | 663 | 669 | 38800000 | 0.182966 | 0.010453 | 0 |
| chr21 | 39300001 | 39400000 | 534 | 684 | 39350000 | -0.16119 | 0.021691 | 0 |
| chr21 | 39500001 | 39600000 | 645 | 670 | 39550000 | 0.141101 | 0.037386 | 0 |
| chr21 | 40000001 | 40100000 | 711 | 733 | 40050000 | 0.151999 | 0.027469 | 0 |
| chr21 | 40150001 | 40250000 | 733 | 741 | 40200000 | 0.180303 | 0.011419 | 0 |
| chr21 | 40750001 | 40850000 | 652 | 676 | 40800000 | 0.143812 | 0.03468  | 0 |
| chr21 | 41300001 | 41400000 | 500 | 646 | 41350000 | -0.17364 | 0.014834 | 0 |
| chr21 | 41350001 | 41450000 | 474 | 602 | 41400000 | -0.14891 | 0.030925 | 0 |
| chr21 | 41450001 | 41550000 | 475 | 614 | 41500000 | -0.17435 | 0.014509 | 0 |
| chr21 | 41500001 | 41600000 | 485 | 617 | 41550000 | -0.15132 | 0.028892 | 0 |
| chr21 | 41700001 | 41800000 | 472 | 597 | 41750000 | -0.14298 | 0.036444 | 0 |
| chr21 | 41750001 | 41850000 | 471 | 605 | 41800000 | -0.16525 | 0.019211 | 0 |
| chr21 | 42750001 | 42850000 | 616 | 640 | 42800000 | 0.140821 | 0.037675 | 0 |
| chr21 | 42850001 | 42950000 | 551 | 701 | 42900000 | -0.1514  | 0.028829 | 0 |
| chr21 | 43050001 | 43150000 | 705 | 733 | 43100000 | 0.139773 | 0.038773 | 0 |
| chr21 | 43250001 | 43350000 | 721 | 738 | 43300000 | 0.162341 | 0.020192 | 0 |
| chr21 | 43750001 | 43850000 | 718 | 746 | 43800000 | 0.140771 | 0.037727 | 0 |
| chr21 | 43850001 | 43950000 | 721 | 752 | 43900000 | 0.13523  | 0.043841 | 0 |
| chr21 | 44050001 | 44150000 | 714 | 724 | 44100000 | 0.175897 | 0.013188 | 0 |
| chr21 | 44100001 | 44200000 | 717 | 736 | 44150000 | 0.15823  | 0.022861 | 0 |
| chr21 | 44700001 | 44800000 | 878 | 890 | 44750000 | 0.176379 | 0.012983 | 0 |
| chr21 | 44900001 | 45000000 | 737 | 748 | 44950000 | 0.174589 | 0.013756 | 0 |

|       |          |          |     |     |          |          |          |   |
|-------|----------|----------|-----|-----|----------|----------|----------|---|
| chr21 | 44950001 | 45050000 | 672 | 692 | 4.50E+07 | 0.153652 | 0.026177 | 0 |
| chr21 | 45050001 | 45150000 | 706 | 737 | 45100000 | 0.133967 | 0.045341 | 0 |
| chr21 | 45250001 | 45350000 | 690 | 708 | 45300000 | 0.15881  | 0.022467 | 0 |
| chr21 | 45350001 | 45450000 | 773 | 783 | 45400000 | 0.177419 | 0.012551 | 0 |
| chr21 | 45400001 | 45500000 | 708 | 736 | 45450000 | 0.140007 | 0.038526 | 0 |
| chr21 | 45550001 | 45650000 | 792 | 812 | 45600000 | 0.159984 | 0.021688 | 0 |
| chr21 | 45700001 | 45800000 | 790 | 814 | 45750000 | 0.152787 | 0.026847 | 0 |
| chr21 | 45750001 | 45850000 | 702 | 715 | 45800000 | 0.169491 | 0.016181 | 0 |
| chr21 | 45800001 | 45900000 | 742 | 757 | 45850000 | 0.167089 | 0.017445 | 0 |
| chr21 | 45850001 | 45950000 | 759 | 769 | 45900000 | 0.177079 | 0.012691 | 0 |
| chr21 | 45900001 | 46000000 | 703 | 721 | 45950000 | 0.159488 | 0.022014 | 0 |
| chr21 | 46050001 | 46150000 | 712 | 723 | 46100000 | 0.173845 | 0.01409  | 0 |
| chr21 | 46100001 | 46200000 | 770 | 793 | 46150000 | 0.153501 | 0.026293 | 0 |
| chr21 | 46350001 | 46450000 | 834 | 855 | 46400000 | 0.160086 | 0.021622 | 0 |
| chr21 | 46400001 | 46500000 | 867 | 875 | 46450000 | 0.182712 | 0.010542 | 0 |
| chr21 | 46600001 | 46700000 | 745 | 757 | 46650000 | 0.17291  | 0.014518 | 0 |
| chr21 | 46950001 | 47050000 | 715 | 743 | 4.70E+07 | 0.140544 | 0.037963 | 0 |
| chr21 | 47200001 | 47300000 | 719 | 749 | 47250000 | 0.136989 | 0.041818 | 0 |
| chr22 | 16000001 | 16100000 | 1   | 4   | 16050000 | -1.80404 | 2.39E-66 | 0 |
| chr22 | 16050001 | 16150000 | 6   | 10  | 16100000 | -0.541   | 2.84E-11 | 0 |
| chr22 | 16100001 | 16200000 | 8   | 8   | 16150000 | 0.195963 | 0.006694 | 0 |
| chr22 | 16150001 | 16250000 | 9   | 5   | 16200000 | 1.04396  | 1.94E-34 | 0 |
| chr22 | 16200001 | 16300000 | 10  | 5   | 16250000 | 1.195963 | 1.84E-42 | 0 |
| chr22 | 16250001 | 16350000 | 13  | 11  | 16300000 | 0.436971 | 2.34E-08 | 0 |
| chr22 | 16300001 | 16400000 | 19  | 19  | 16350000 | 0.195963 | 0.006694 | 0 |
| chr22 | 16400001 | 16500000 | 3   | 6   | 16450000 | -0.80404 | 3.29E-21 | 0 |
| chr22 | 16450001 | 16550000 | 6   | 9   | 16500000 | -0.389   | 8.31E-07 | 0 |
| chr22 | 16550001 | 16650000 | 7   | 5   | 16600000 | 0.68139  | 3.58E-17 | 0 |
| chr22 | 16600001 | 16700000 | 5   | 3   | 16650000 | 0.932929 | 8.75E-29 | 0 |
| chr22 | 16650001 | 16750000 | 2   | 2   | 16700000 | 0.195963 | 0.006694 | 0 |
| chr22 | 16950001 | 17050000 | 83  | 118 | 1.70E+07 | -0.31164 | 5.56E-05 | 0 |
| chr22 | 18100001 | 18200000 | 526 | 505 | 18150000 | 0.254742 | 0.000661 | 0 |
| chr22 | 18650001 | 18750000 | 15  | 21  | 18700000 | -0.28946 | 0.000161 | 0 |
| chr22 | 18700001 | 18800000 | 9   | 15  | 18750000 | -0.541   | 2.84E-11 | 0 |
| chr22 | 18750001 | 18850000 | 10  | 9   | 18800000 | 0.347966 | 6.17E-06 | 0 |
| chr22 | 19050001 | 19150000 | 671 | 675 | 19100000 | 0.187388 | 0.009006 | 0 |
| chr22 | 19100001 | 19200000 | 782 | 726 | 19150000 | 0.303162 | 6.80E-05 | 0 |
| chr22 | 19150001 | 19250000 | 718 | 715 | 19200000 | 0.202004 | 0.005397 | 0 |
| chr22 | 19300001 | 19400000 | 681 | 653 | 19350000 | 0.256535 | 0.000611 | 0 |
| chr22 | 19350001 | 19450000 | 736 | 700 | 19400000 | 0.268314 | 0.000361 | 0 |
| chr22 | 19400001 | 19500000 | 720 | 699 | 19450000 | 0.238667 | 0.001307 | 0 |
| chr22 | 19450001 | 19550000 | 724 | 668 | 19500000 | 0.312105 | 4.31E-05 | 0 |
| chr22 | 19650001 | 19750000 | 781 | 775 | 19700000 | 0.207089 | 0.004485 | 0 |
| chr22 | 19900001 | 20000000 | 823 | 752 | 19950000 | 0.326123 | 2.06E-05 | 0 |
| chr22 | 19950001 | 20050000 | 870 | 790 | 2.00E+07 | 0.335126 | 1.26E-05 | 0 |
| chr22 | 20200001 | 20300000 | 688 | 688 | 20250000 | 0.195963 | 0.006694 | 0 |
| chr22 | 20250001 | 20350000 | 279 | 261 | 20300000 | 0.292178 | 0.000117 | 0 |

|       |          |          |     |     |          |          |          |   |
|-------|----------|----------|-----|-----|----------|----------|----------|---|
| chr22 | 20350001 | 20450000 | 3   | 7   | 20400000 | -1.02643 | 5.11E-31 | 0 |
| chr22 | 20400001 | 20500000 | 2   | 2   | 20450000 | 0.195963 | 0.006694 | 0 |
| chr22 | 20450001 | 20550000 | 1   | 3   | 20500000 | -1.389   | 6.26E-48 | 0 |
| chr22 | 20500001 | 20600000 | 1   | 2   | 20550000 | -0.80404 | 3.29E-21 | 0 |
| chr22 | 20600001 | 20700000 | 4   | 4   | 20650000 | 0.195963 | 0.006694 | 0 |
| chr22 | 20650001 | 20750000 | 120 | 101 | 20700000 | 0.444642 | 1.38E-08 | 0 |
| chr22 | 20700001 | 20800000 | 497 | 493 | 20750000 | 0.207621 | 0.004398 | 0 |
| chr22 | 20750001 | 20850000 | 701 | 690 | 20800000 | 0.218781 | 0.002889 | 0 |
| chr22 | 20800001 | 20900000 | 620 | 624 | 20850000 | 0.186685 | 0.009224 | 0 |
| chr22 | 20850001 | 20950000 | 709 | 702 | 20900000 | 0.210278 | 0.003985 | 0 |
| chr22 | 20900001 | 21000000 | 766 | 747 | 20950000 | 0.232199 | 0.001703 | 0 |
| chr22 | 21100001 | 21200000 | 616 | 616 | 21150000 | 0.195963 | 0.006694 | 0 |
| chr22 | 21150001 | 21250000 | 610 | 606 | 21200000 | 0.205454 | 0.004762 | 0 |
| chr22 | 21300001 | 21400000 | 749 | 723 | 21350000 | 0.246933 | 0.000925 | 0 |
| chr22 | 21350001 | 21450000 | 613 | 591 | 21400000 | 0.248692 | 0.000858 | 0 |
| chr22 | 21500001 | 21600000 | 10  | 9   | 21550000 | 0.347966 | 6.17E-06 | 0 |
| chr22 | 21600001 | 21700000 | 3   | 9   | 21650000 | -1.389   | 6.26E-48 | 0 |
| chr22 | 21650001 | 21750000 | 1   | 6   | 21700000 | -2.389   | 7.64E-88 | 0 |
| chr22 | 21750001 | 21850000 | 126 | 120 | 21800000 | 0.266352 | 0.000395 | 0 |
| chr22 | 21800001 | 21900000 | 102 | 94  | 21850000 | 0.3138   | 3.94E-05 | 0 |
| chr22 | 21950001 | 22050000 | 687 | 657 | 2.20E+07 | 0.26038  | 0.000516 | 0 |
| chr22 | 22000001 | 22100000 | 673 | 647 | 22050000 | 0.252804 | 0.000719 | 0 |
| chr22 | 22050001 | 22150000 | 627 | 627 | 22100000 | 0.195963 | 0.006694 | 0 |
| chr22 | 22600001 | 22700000 | 263 | 257 | 22650000 | 0.229257 | 0.001916 | 0 |
| chr22 | 22650001 | 22750000 | 481 | 471 | 22700000 | 0.226273 | 0.002157 | 0 |
| chr22 | 22850001 | 22950000 | 610 | 612 | 22900000 | 0.191241 | 0.007892 | 0 |
| chr22 | 23450001 | 23550000 | 758 | 724 | 23500000 | 0.262171 | 0.000476 | 0 |
| chr22 | 23750001 | 23850000 | 403 | 402 | 23800000 | 0.199547 | 0.005895 | 0 |
| chr22 | 24150001 | 24250000 | 677 | 668 | 24200000 | 0.215271 | 0.003303 | 0 |
| chr22 | 24200001 | 24300000 | 561 | 523 | 24250000 | 0.297153 | 9.18E-05 | 0 |
| chr22 | 24300001 | 24400000 | 187 | 184 | 24350000 | 0.219296 | 0.002832 | 0 |
| chr22 | 24350001 | 24450000 | 476 | 427 | 24400000 | 0.352689 | 4.72E-06 | 0 |
| chr22 | 24400001 | 24500000 | 691 | 677 | 24450000 | 0.225493 | 0.002225 | 0 |
| chr22 | 24900001 | 25000000 | 667 | 662 | 24950000 | 0.206819 | 0.004529 | 0 |
| chr22 | 24950001 | 25050000 | 360 | 340 | 2.50E+07 | 0.278425 | 0.000226 | 0 |
| chr22 | 25000001 | 25100000 | 188 | 176 | 25050000 | 0.29112  | 0.000123 | 0 |
| chr22 | 25600001 | 25700000 | 363 | 363 | 25650000 | 0.195963 | 0.006694 | 0 |
| chr22 | 25800001 | 25900000 | 492 | 475 | 25850000 | 0.246694 | 0.000934 | 0 |
| chr22 | 25850001 | 25950000 | 502 | 506 | 25900000 | 0.184513 | 0.009925 | 0 |
| chr22 | 26200001 | 26300000 | 569 | 753 | 26250000 | -0.20826 | 0.004627 | 0 |
| chr22 | 26800001 | 26900000 | 658 | 663 | 26850000 | 0.185042 | 0.00975  | 0 |
| chr22 | 26850001 | 26950000 | 658 | 652 | 26900000 | 0.209179 | 0.004152 | 0 |
| chr22 | 26900001 | 27000000 | 671 | 666 | 26950000 | 0.206754 | 0.00454  | 0 |
| chr22 | 29050001 | 29150000 | 486 | 476 | 29100000 | 0.225958 | 0.002184 | 0 |
| chr22 | 29100001 | 29200000 | 606 | 599 | 29150000 | 0.212725 | 0.003637 | 0 |
| chr22 | 29600001 | 29700000 | 711 | 711 | 29650000 | 0.195963 | 0.006694 | 0 |
| chr22 | 29900001 | 30000000 | 639 | 601 | 29950000 | 0.284414 | 0.000171 | 0 |



|       |          |          |     |     |          |          |          |   |
|-------|----------|----------|-----|-----|----------|----------|----------|---|
| chr22 | 30200001 | 30300000 | 632 | 629 | 30250000 | 0.202828 | 0.005239 | 0 |
| chr22 | 30600001 | 30700000 | 839 | 836 | 30650000 | 0.201131 | 0.00557  | 0 |
| chr22 | 30650001 | 30750000 | 834 | 817 | 30700000 | 0.225674 | 0.002209 | 0 |
| chr22 | 30700001 | 30800000 | 845 | 779 | 30750000 | 0.313291 | 4.05E-05 | 0 |
| chr22 | 30750001 | 30850000 | 786 | 733 | 30800000 | 0.296679 | 9.39E-05 | 0 |
| chr22 | 30800001 | 30900000 | 694 | 691 | 30850000 | 0.202213 | 0.005357 | 0 |
| chr22 | 31050001 | 31150000 | 619 | 568 | 31100000 | 0.320012 | 2.85E-05 | 0 |
| chr22 | 31100001 | 31200000 | 635 | 624 | 31150000 | 0.221174 | 0.002634 | 0 |
| chr22 | 31200001 | 31300000 | 734 | 738 | 31250000 | 0.188122 | 0.008784 | 0 |
| chr22 | 31450001 | 31550000 | 677 | 647 | 31500000 | 0.261353 | 0.000494 | 0 |
| chr22 | 31500001 | 31600000 | 655 | 639 | 31550000 | 0.231642 | 0.001741 | 0 |
| chr22 | 31550001 | 31650000 | 640 | 631 | 31600000 | 0.216395 | 0.003165 | 0 |
| chr22 | 31600001 | 31700000 | 724 | 728 | 31650000 | 0.188014 | 0.008816 | 0 |
| chr22 | 31700001 | 31800000 | 606 | 608 | 31750000 | 0.19121  | 0.007901 | 0 |
| chr22 | 31750001 | 31850000 | 520 | 522 | 31800000 | 0.190425 | 0.008117 | 0 |
| chr22 | 32150001 | 32250000 | 306 | 305 | 32200000 | 0.200685 | 0.005659 | 0 |
| chr22 | 32850001 | 32950000 | 720 | 723 | 32900000 | 0.189964 | 0.008247 | 0 |
| chr22 | 34650001 | 34750000 | 425 | 563 | 34700000 | -0.20971 | 0.004392 | 0 |
| chr22 | 34700001 | 34800000 | 415 | 555 | 34750000 | -0.22341 | 0.002643 | 0 |
| chr22 | 34750001 | 34850000 | 429 | 563 | 34800000 | -0.19619 | 0.007072 | 0 |
| chr22 | 34800001 | 34900000 | 447 | 588 | 34850000 | -0.19958 | 0.006291 | 0 |
| chr22 | 35650001 | 35750000 | 763 | 755 | 35700000 | 0.211169 | 0.003855 | 0 |
| chr22 | 35700001 | 35800000 | 767 | 728 | 35750000 | 0.271251 | 0.000316 | 0 |
| chr22 | 35750001 | 35850000 | 789 | 727 | 35800000 | 0.314033 | 3.90E-05 | 0 |
| chr22 | 35800001 | 35900000 | 789 | 746 | 35850000 | 0.276813 | 0.000244 | 0 |
| chr22 | 35900001 | 36000000 | 776 | 782 | 35950000 | 0.184851 | 0.009813 | 0 |
| chr22 | 35950001 | 36050000 | 773 | 714 | 3.60E+07 | 0.310507 | 4.67E-05 | 0 |
| chr22 | 36000001 | 36100000 | 626 | 618 | 36050000 | 0.214519 | 0.003399 | 0 |
| chr22 | 36400001 | 36500000 | 546 | 539 | 36450000 | 0.214579 | 0.003391 | 0 |
| chr22 | 36450001 | 36550000 | 566 | 553 | 36500000 | 0.229486 | 0.001899 | 0 |
| chr22 | 36500001 | 36600000 | 598 | 596 | 36550000 | 0.200796 | 0.005637 | 0 |
| chr22 | 36550001 | 36650000 | 587 | 588 | 36600000 | 0.193507 | 0.007295 | 0 |
| chr22 | 36600001 | 36700000 | 592 | 591 | 36650000 | 0.198402 | 0.00614  | 0 |
| chr22 | 36650001 | 36750000 | 707 | 661 | 36700000 | 0.293023 | 0.000112 | 0 |
| chr22 | 36700001 | 36800000 | 731 | 689 | 36750000 | 0.28133  | 0.000197 | 0 |
| chr22 | 36850001 | 36950000 | 684 | 685 | 36900000 | 0.193855 | 0.007207 | 0 |
| chr22 | 37050001 | 37150000 | 725 | 711 | 37100000 | 0.224094 | 0.00235  | 0 |
| chr22 | 37100001 | 37200000 | 672 | 675 | 37150000 | 0.189537 | 0.008369 | 0 |
| chr22 | 37150001 | 37250000 | 740 | 739 | 37200000 | 0.197914 | 0.006248 | 0 |
| chr22 | 37200001 | 37300000 | 756 | 745 | 37250000 | 0.217109 | 0.00308  | 0 |
| chr22 | 37350001 | 37450000 | 738 | 716 | 37400000 | 0.239624 | 0.001257 | 0 |
| chr22 | 37400001 | 37500000 | 827 | 797 | 37450000 | 0.249271 | 0.000837 | 0 |
| chr22 | 37450001 | 37550000 | 845 | 837 | 37500000 | 0.209687 | 0.004074 | 0 |
| chr22 | 37500001 | 37600000 | 836 | 806 | 37550000 | 0.248686 | 0.000859 | 0 |
| chr22 | 37550001 | 37650000 | 819 | 813 | 37600000 | 0.206571 | 0.004571 | 0 |
| chr22 | 37900001 | 38000000 | 704 | 691 | 37950000 | 0.222853 | 0.002467 | 0 |
| chr22 | 37950001 | 38050000 | 737 | 727 | 3.80E+07 | 0.215672 | 0.003253 | 0 |

|       |          |          |     |     |          |          |          |   |
|-------|----------|----------|-----|-----|----------|----------|----------|---|
| chr22 | 38050001 | 38150000 | 726 | 694 | 38100000 | 0.260997 | 0.000502 | 0 |
| chr22 | 38100001 | 38200000 | 754 | 675 | 38150000 | 0.35564  | 3.98E-06 | 0 |
| chr22 | 38150001 | 38250000 | 723 | 624 | 38200000 | 0.408413 | 1.57E-07 | 0 |
| chr22 | 38200001 | 38300000 | 659 | 631 | 38250000 | 0.258601 | 0.000558 | 0 |
| chr22 | 38400001 | 38500000 | 773 | 772 | 38450000 | 0.197831 | 0.006266 | 0 |
| chr22 | 38450001 | 38550000 | 760 | 719 | 38500000 | 0.275971 | 0.000254 | 0 |
| chr22 | 38550001 | 38650000 | 722 | 712 | 38600000 | 0.216085 | 0.003203 | 0 |
| chr22 | 38600001 | 38700000 | 803 | 738 | 38650000 | 0.317742 | 3.21E-05 | 0 |
| chr22 | 38650001 | 38750000 | 729 | 712 | 38700000 | 0.230005 | 0.00186  | 0 |
| chr22 | 38700001 | 38800000 | 436 | 429 | 38750000 | 0.219314 | 0.00283  | 0 |
| chr22 | 38850001 | 38950000 | 632 | 628 | 38900000 | 0.205123 | 0.00482  | 0 |
| chr22 | 39050001 | 39150000 | 705 | 677 | 39100000 | 0.25443  | 0.00067  | 0 |
| chr22 | 39250001 | 39350000 | 704 | 669 | 39300000 | 0.269532 | 0.000342 | 0 |
| chr22 | 39450001 | 39550000 | 580 | 568 | 39500000 | 0.226125 | 0.00217  | 0 |
| chr22 | 39500001 | 39600000 | 659 | 635 | 39550000 | 0.249485 | 0.00083  | 0 |
| chr22 | 39600001 | 39700000 | 823 | 753 | 39650000 | 0.324206 | 2.28E-05 | 0 |
| chr22 | 39650001 | 39750000 | 717 | 645 | 39700000 | 0.348637 | 5.94E-06 | 0 |
| chr22 | 39850001 | 39950000 | 744 | 727 | 39900000 | 0.22931  | 0.001912 | 0 |
| chr22 | 40700001 | 40800000 | 682 | 675 | 40750000 | 0.210847 | 0.003902 | 0 |
| chr22 | 40750001 | 40850000 | 738 | 703 | 40800000 | 0.266059 | 0.0004   | 0 |
| chr22 | 40900001 | 41000000 | 625 | 591 | 40950000 | 0.276661 | 0.000246 | 0 |
| chr22 | 40950001 | 41050000 | 623 | 614 | 4.10E+07 | 0.216957 | 0.003098 | 0 |
| chr22 | 41450001 | 41550000 | 606 | 596 | 41500000 | 0.219968 | 0.00276  | 0 |
| chr22 | 41500001 | 41600000 | 657 | 625 | 41550000 | 0.268    | 0.000366 | 0 |
| chr22 | 41550001 | 41650000 | 718 | 686 | 41600000 | 0.261738 | 0.000486 | 0 |
| chr22 | 41600001 | 41700000 | 723 | 685 | 41650000 | 0.273855 | 0.00028  | 0 |
| chr22 | 41650001 | 41750000 | 683 | 658 | 41700000 | 0.249761 | 0.00082  | 0 |
| chr22 | 41700001 | 41800000 | 705 | 682 | 41750000 | 0.243815 | 0.001055 | 0 |
| chr22 | 41750001 | 41850000 | 639 | 633 | 41800000 | 0.209573 | 0.004091 | 0 |
| chr22 | 41800001 | 41900000 | 600 | 601 | 41850000 | 0.193561 | 0.007282 | 0 |
| chr22 | 41850001 | 41950000 | 656 | 649 | 41900000 | 0.21144  | 0.003816 | 0 |
| chr22 | 41900001 | 42000000 | 714 | 678 | 41950000 | 0.270602 | 0.000325 | 0 |
| chr22 | 41950001 | 42050000 | 683 | 596 | 4.20E+07 | 0.392536 | 4.32E-07 | 0 |
| chr22 | 42000001 | 42100000 | 628 | 523 | 42050000 | 0.459917 | 4.69E-09 | 0 |
| chr22 | 42050001 | 42150000 | 623 | 559 | 42100000 | 0.352347 | 4.81E-06 | 0 |
| chr22 | 42150001 | 42250000 | 653 | 649 | 42200000 | 0.204828 | 0.004872 | 0 |
| chr22 | 42200001 | 42300000 | 722 | 662 | 42250000 | 0.321131 | 2.69E-05 | 0 |
| chr22 | 42250001 | 42350000 | 809 | 694 | 42300000 | 0.417167 | 8.86E-08 | 0 |
| chr22 | 42300001 | 42400000 | 767 | 736 | 42350000 | 0.255484 | 0.00064  | 0 |
| chr22 | 42650001 | 42750000 | 840 | 846 | 42700000 | 0.185695 | 0.009538 | 0 |
| chr22 | 42700001 | 42800000 | 832 | 826 | 42750000 | 0.206405 | 0.004599 | 0 |
| chr22 | 42900001 | 43000000 | 523 | 509 | 42950000 | 0.235108 | 0.001513 | 0 |
| chr22 | 42950001 | 43050000 | 609 | 576 | 4.30E+07 | 0.276336 | 0.00025  | 0 |
| chr22 | 43450001 | 43550000 | 645 | 585 | 43500000 | 0.336826 | 1.15E-05 | 0 |
| chr22 | 43500001 | 43600000 | 787 | 686 | 43550000 | 0.394118 | 3.91E-07 | 0 |
| chr22 | 43550001 | 43650000 | 839 | 804 | 43600000 | 0.257438 | 0.000588 | 0 |
| chr22 | 44200001 | 44300000 | 797 | 737 | 44250000 | 0.308878 | 5.08E-05 | 0 |

|       |          |          |     |     |          |          |          |   |
|-------|----------|----------|-----|-----|----------|----------|----------|---|
| chr22 | 44250001 | 44350000 | 761 | 695 | 44300000 | 0.326847 | 1.98E-05 | 0 |
| chr22 | 44300001 | 44400000 | 716 | 696 | 44350000 | 0.236835 | 0.00141  | 0 |
| chr22 | 44350001 | 44450000 | 679 | 677 | 44400000 | 0.200219 | 0.005755 | 0 |
| chr22 | 44600001 | 44700000 | 555 | 726 | 44650000 | -0.19152 | 0.008292 | 0 |
| chr22 | 45050001 | 45150000 | 682 | 651 | 45100000 | 0.263077 | 0.000458 | 0 |
| chr22 | 45100001 | 45200000 | 651 | 621 | 45150000 | 0.264027 | 0.000439 | 0 |
| chr22 | 45650001 | 45750000 | 710 | 690 | 45700000 | 0.237186 | 0.00139  | 0 |
| chr22 | 45700001 | 45800000 | 665 | 657 | 45750000 | 0.213424 | 0.003542 | 0 |
| chr22 | 45950001 | 46050000 | 741 | 724 | 4.60E+07 | 0.229447 | 0.001902 | 0 |
| chr22 | 46000001 | 46100000 | 726 | 716 | 46050000 | 0.215973 | 0.003216 | 0 |
| chr22 | 46300001 | 46400000 | 953 | 899 | 46350000 | 0.280118 | 0.000209 | 0 |
| chr22 | 46350001 | 46450000 | 922 | 825 | 46400000 | 0.356336 | 3.83E-06 | 0 |
| chr22 | 46400001 | 46500000 | 910 | 786 | 46450000 | 0.4073   | 1.69E-07 | 0 |
| chr22 | 46450001 | 46550000 | 891 | 835 | 46500000 | 0.289612 | 0.000133 | 0 |
| chr22 | 46600001 | 46700000 | 693 | 695 | 46650000 | 0.191805 | 0.00774  | 0 |
| chr22 | 47100001 | 47200000 | 814 | 772 | 47150000 | 0.272391 | 0.0003   | 0 |
| chr22 | 47150001 | 47250000 | 783 | 765 | 47200000 | 0.229516 | 0.001896 | 0 |
| chr22 | 49450001 | 49550000 | 698 | 670 | 49500000 | 0.255029 | 0.000653 | 0 |
| chr22 | 49500001 | 49600000 | 721 | 704 | 49550000 | 0.230387 | 0.001831 | 0 |
| chr22 | 50150001 | 50250000 | 742 | 718 | 50200000 | 0.243398 | 0.001074 | 0 |
| chr22 | 50250001 | 50350000 | 790 | 753 | 50300000 | 0.265166 | 0.000417 | 0 |
| chr22 | 50300001 | 50400000 | 591 | 504 | 50350000 | 0.425697 | 5.02E-08 | 0 |
| chr22 | 50350001 | 50450000 | 422 | 386 | 50400000 | 0.324605 | 2.23E-05 | 0 |
| chr22 | 50500001 | 50600000 | 653 | 656 | 50550000 | 0.18935  | 0.008423 | 0 |
| chr22 | 50650001 | 50750000 | 896 | 872 | 50700000 | 0.235134 | 0.001511 | 0 |
| chr22 | 50700001 | 50800000 | 816 | 775 | 50750000 | 0.270336 | 0.000329 | 0 |
| chr22 | 50800001 | 50900000 | 651 | 643 | 50850000 | 0.213802 | 0.003492 | 0 |
| chr22 | 50950001 | 51050000 | 814 | 795 | 5.10E+07 | 0.230037 | 0.001857 | 0 |
| chr22 | 51000001 | 51100000 | 748 | 716 | 51050000 | 0.259042 | 0.000548 | 0 |
| chr22 | 51050001 | 51150000 | 681 | 664 | 51100000 | 0.232435 | 0.001686 | 0 |
| chr22 | 51100001 | 51200000 | 651 | 604 | 51150000 | 0.304072 | 6.49E-05 | 0 |
| chr22 | 51150001 | 51250000 | 288 | 262 | 51200000 | 0.332465 | 1.46E-05 | 0 |
| chr22 | 51200001 | 51300000 | 19  | 12  | 51250000 | 0.858928 | 3.63E-25 | 0 |
| chr22 | 17500001 | 17600000 | 528 | 533 | 17550000 | 0.182365 | 0.010664 | 0 |
| chr22 | 17550001 | 17650000 | 653 | 661 | 17600000 | 0.178396 | 0.012157 | 0 |
| chr22 | 18000001 | 18100000 | 548 | 554 | 18050000 | 0.180253 | 0.011438 | 0 |
| chr22 | 18050001 | 18150000 | 517 | 532 | 18100000 | 0.154701 | 0.025384 | 0 |
| chr22 | 18150001 | 18250000 | 559 | 568 | 18200000 | 0.17292  | 0.014513 | 0 |
| chr22 | 18250001 | 18350000 | 764 | 785 | 18300000 | 0.156843 | 0.023826 | 0 |
| chr22 | 18450001 | 18550000 | 596 | 620 | 18500000 | 0.139007 | 0.039593 | 0 |
| chr22 | 18900001 | 19000000 | 410 | 415 | 18950000 | 0.178476 | 0.012126 | 0 |
| chr22 | 18950001 | 19050000 | 534 | 545 | 1.90E+07 | 0.166547 | 0.017741 | 0 |
| chr22 | 19500001 | 19600000 | 648 | 654 | 19550000 | 0.182666 | 0.010558 | 0 |
| chr22 | 19600001 | 19700000 | 695 | 704 | 19650000 | 0.177401 | 0.012559 | 0 |
| chr22 | 19700001 | 19800000 | 855 | 873 | 19750000 | 0.165906 | 0.018098 | 0 |
| chr22 | 19850001 | 19950000 | 709 | 742 | 19900000 | 0.130329 | 0.049892 | 0 |
| chr22 | 20000001 | 20100000 | 729 | 762 | 20050000 | 0.132091 | 0.047645 | 0 |

|       |          |          |     |     |          |          |          |   |
|-------|----------|----------|-----|-----|----------|----------|----------|---|
| chr22 | 20050001 | 20150000 | 760 | 784 | 20100000 | 0.151109 | 0.028187 | 0 |
| chr22 | 21050001 | 21150000 | 471 | 484 | 21100000 | 0.156683 | 0.02394  | 0 |
| chr22 | 21900001 | 22000000 | 571 | 577 | 21950000 | 0.180882 | 0.011202 | 0 |
| chr22 | 22800001 | 22900000 | 533 | 545 | 22850000 | 0.163842 | 0.019286 | 0 |
| chr22 | 22900001 | 23000000 | 447 | 456 | 22950000 | 0.167204 | 0.017382 | 0 |
| chr22 | 23200001 | 23300000 | 690 | 717 | 23250000 | 0.140586 | 0.037919 | 0 |
| chr22 | 23350001 | 23450000 | 670 | 693 | 23400000 | 0.147269 | 0.031465 | 0 |
| chr22 | 23400001 | 23500000 | 771 | 805 | 23450000 | 0.133705 | 0.045657 | 0 |
| chr22 | 23600001 | 23700000 | 460 | 479 | 23650000 | 0.137571 | 0.041166 | 0 |
| chr22 | 23650001 | 23750000 | 424 | 435 | 23700000 | 0.159012 | 0.022332 | 0 |
| chr22 | 23800001 | 23900000 | 539 | 555 | 23850000 | 0.153761 | 0.026094 | 0 |
| chr22 | 23950001 | 24050000 | 548 | 553 | 2.40E+07 | 0.182859 | 0.01049  | 0 |
| chr22 | 24100001 | 24200000 | 649 | 661 | 24150000 | 0.169531 | 0.01616  | 0 |
| chr22 | 24250001 | 24350000 | 248 | 251 | 24300000 | 0.178616 | 0.01207  | 0 |
| chr22 | 25750001 | 25850000 | 521 | 539 | 25800000 | 0.146961 | 0.031741 | 0 |
| chr22 | 26350001 | 26450000 | 612 | 622 | 26400000 | 0.17258  | 0.014672 | 0 |
| chr22 | 26950001 | 27050000 | 652 | 662 | 2.70E+07 | 0.174004 | 0.014018 | 0 |
| chr22 | 27600001 | 27700000 | 650 | 679 | 27650000 | 0.132991 | 0.046527 | 0 |
| chr22 | 28050001 | 28150000 | 705 | 728 | 28100000 | 0.149648 | 0.029399 | 0 |
| chr22 | 28850001 | 28950000 | 516 | 537 | 28900000 | 0.138412 | 0.040239 | 0 |
| chr22 | 29000001 | 29100000 | 444 | 449 | 29050000 | 0.179807 | 0.011607 | 0 |
| chr22 | 29650001 | 29750000 | 712 | 728 | 29700000 | 0.163902 | 0.019251 | 0 |
| chr22 | 29700001 | 29800000 | 669 | 700 | 29750000 | 0.130614 | 0.049523 | 0 |
| chr22 | 30000001 | 30100000 | 589 | 757 | 30050000 | -0.16606 | 0.018741 | 0 |
| chr22 | 30150001 | 30250000 | 668 | 696 | 30200000 | 0.136724 | 0.042118 | 0 |
| chr22 | 30350001 | 30450000 | 690 | 700 | 30400000 | 0.175204 | 0.013486 | 0 |
| chr22 | 30400001 | 30500000 | 675 | 686 | 30450000 | 0.172642 | 0.014643 | 0 |
| chr22 | 30850001 | 30950000 | 647 | 675 | 30900000 | 0.134841 | 0.044298 | 0 |
| chr22 | 31000001 | 31100000 | 628 | 648 | 31050000 | 0.150734 | 0.028494 | 0 |
| chr22 | 31150001 | 31250000 | 668 | 691 | 31200000 | 0.147125 | 0.031593 | 0 |
| chr22 | 31250001 | 31350000 | 753 | 768 | 31300000 | 0.167507 | 0.017219 | 0 |
| chr22 | 31300001 | 31400000 | 686 | 696 | 31350000 | 0.175084 | 0.013539 | 0 |
| chr22 | 31400001 | 31500000 | 581 | 608 | 31450000 | 0.13043  | 0.049762 | 0 |
| chr22 | 31650001 | 31750000 | 745 | 766 | 31700000 | 0.155859 | 0.024531 | 0 |
| chr22 | 31800001 | 31900000 | 551 | 573 | 31850000 | 0.13948  | 0.039085 | 0 |
| chr22 | 31950001 | 32050000 | 624 | 632 | 3.20E+07 | 0.177585 | 0.012484 | 0 |
| chr22 | 32000001 | 32100000 | 510 | 527 | 32050000 | 0.148657 | 0.030245 | 0 |
| chr22 | 32200001 | 32300000 | 322 | 330 | 32250000 | 0.160558 | 0.021316 | 0 |
| chr22 | 32350001 | 32450000 | 359 | 373 | 32400000 | 0.140771 | 0.037727 | 0 |
| chr22 | 32800001 | 32900000 | 705 | 721 | 32850000 | 0.163587 | 0.019438 | 0 |
| chr22 | 32900001 | 33000000 | 699 | 720 | 32950000 | 0.153259 | 0.02648  | 0 |
| chr22 | 32950001 | 33050000 | 695 | 705 | 3.30E+07 | 0.175353 | 0.013422 | 0 |
| chr22 | 33000001 | 33100000 | 676 | 696 | 33050000 | 0.153899 | 0.025988 | 0 |
| chr22 | 33950001 | 34050000 | 500 | 633 | 3.40E+07 | -0.14431 | 0.035138 | 0 |
| chr22 | 34150001 | 34250000 | 474 | 599 | 34200000 | -0.14171 | 0.037731 | 0 |
| chr22 | 34500001 | 34600000 | 449 | 585 | 34550000 | -0.18576 | 0.010048 | 0 |
| chr22 | 35000001 | 35100000 | 492 | 509 | 35050000 | 0.146956 | 0.031746 | 0 |

|       |          |          |     |     |          |          |          |   |
|-------|----------|----------|-----|-----|----------|----------|----------|---|
| chr22 | 35600001 | 35700000 | 635 | 652 | 35650000 | 0.157848 | 0.023124 | 0 |
| chr22 | 35850001 | 35950000 | 726 | 742 | 35900000 | 0.164513 | 0.018893 | 0 |
| chr22 | 37250001 | 37350000 | 706 | 720 | 37300000 | 0.167634 | 0.017151 | 0 |
| chr22 | 38300001 | 38400000 | 735 | 768 | 38350000 | 0.132601 | 0.047009 | 0 |
| chr22 | 38500001 | 38600000 | 681 | 709 | 38550000 | 0.137832 | 0.040876 | 0 |
| chr22 | 38750001 | 38850000 | 436 | 453 | 38800000 | 0.14078  | 0.037718 | 0 |
| chr22 | 38800001 | 38900000 | 716 | 726 | 38850000 | 0.175953 | 0.013164 | 0 |
| chr22 | 39000001 | 39100000 | 618 | 642 | 39050000 | 0.140997 | 0.037494 | 0 |
| chr22 | 39100001 | 39200000 | 764 | 789 | 39150000 | 0.14951  | 0.029515 | 0 |
| chr22 | 39200001 | 39300000 | 706 | 715 | 39250000 | 0.177688 | 0.012442 | 0 |
| chr22 | 39400001 | 39500000 | 428 | 444 | 39450000 | 0.143014 | 0.035459 | 0 |
| chr22 | 39550001 | 39650000 | 732 | 743 | 39600000 | 0.174444 | 0.013821 | 0 |
| chr22 | 39700001 | 39800000 | 656 | 669 | 39750000 | 0.167653 | 0.017141 | 0 |
| chr22 | 39900001 | 40000000 | 747 | 763 | 39950000 | 0.165388 | 0.01839  | 0 |
| chr22 | 40200001 | 40300000 | 579 | 597 | 40250000 | 0.151795 | 0.027632 | 0 |
| chr22 | 40250001 | 40350000 | 636 | 654 | 40300000 | 0.155699 | 0.024647 | 0 |
| chr22 | 40500001 | 40600000 | 597 | 612 | 40550000 | 0.160162 | 0.021572 | 0 |
| chr22 | 40550001 | 40650000 | 617 | 637 | 40600000 | 0.14994  | 0.029153 | 0 |
| chr22 | 41050001 | 41150000 | 572 | 594 | 41100000 | 0.141515 | 0.036962 | 0 |
| chr22 | 41200001 | 41300000 | 606 | 624 | 41250000 | 0.153735 | 0.026114 | 0 |
| chr22 | 41250001 | 41350000 | 568 | 580 | 41300000 | 0.165801 | 0.018156 | 0 |
| chr22 | 41400001 | 41500000 | 562 | 568 | 41450000 | 0.180642 | 0.011292 | 0 |
| chr22 | 42100001 | 42200000 | 596 | 605 | 42150000 | 0.17434  | 0.013867 | 0 |
| chr22 | 42400001 | 42500000 | 581 | 607 | 42450000 | 0.132805 | 0.046757 | 0 |
| chr22 | 43000001 | 43100000 | 658 | 672 | 43050000 | 0.165589 | 0.018276 | 0 |
| chr22 | 43250001 | 43350000 | 764 | 779 | 43300000 | 0.167912 | 0.017002 | 0 |
| chr22 | 43400001 | 43500000 | 560 | 574 | 43450000 | 0.160339 | 0.021457 | 0 |
| chr22 | 43600001 | 43700000 | 813 | 838 | 43650000 | 0.152268 | 0.027255 | 0 |
| chr22 | 44000001 | 44100000 | 615 | 637 | 44050000 | 0.145256 | 0.033305 | 0 |
| chr22 | 46250001 | 46350000 | 844 | 870 | 46300000 | 0.152191 | 0.027317 | 0 |
| chr22 | 46650001 | 46750000 | 713 | 731 | 46700000 | 0.159994 | 0.021682 | 0 |
| chr22 | 46850001 | 46950000 | 684 | 713 | 46900000 | 0.136057 | 0.04288  | 0 |
| chr22 | 46900001 | 47000000 | 753 | 772 | 46950000 | 0.160012 | 0.02167  | 0 |
| chr22 | 46950001 | 47050000 | 755 | 770 | 4.70E+07 | 0.167581 | 0.017179 | 0 |
| chr22 | 47000001 | 47100000 | 754 | 779 | 47050000 | 0.148904 | 0.030032 | 0 |
| chr22 | 47050001 | 47150000 | 781 | 800 | 47100000 | 0.161286 | 0.020851 | 0 |
| chr22 | 47700001 | 47800000 | 643 | 659 | 47750000 | 0.160503 | 0.021351 | 0 |
| chr22 | 47900001 | 48000000 | 633 | 659 | 47950000 | 0.13789  | 0.040812 | 0 |
| chr22 | 48100001 | 48200000 | 601 | 621 | 48150000 | 0.148735 | 0.030178 | 0 |
| chr22 | 48450001 | 48550000 | 595 | 750 | 48500000 | -0.13804 | 0.04164  | 0 |
| chr22 | 48700001 | 48800000 | 558 | 719 | 48750000 | -0.16976 | 0.016735 | 0 |
| chr22 | 48800001 | 48900000 | 635 | 660 | 48850000 | 0.140254 | 0.038267 | 0 |
| chr22 | 48950001 | 49050000 | 730 | 743 | 4.90E+07 | 0.170497 | 0.015675 | 0 |
| chr22 | 49000001 | 49100000 | 698 | 721 | 49050000 | 0.149191 | 0.029787 | 0 |
| chr22 | 49150001 | 49250000 | 652 | 674 | 49200000 | 0.148086 | 0.030742 | 0 |
| chr22 | 50100001 | 50200000 | 716 | 722 | 50150000 | 0.183924 | 0.010123 | 0 |
| chr22 | 50200001 | 50300000 | 716 | 731 | 50250000 | 0.166051 | 0.018016 | 0 |

|       |          |          |      |      |          |          |          |   |
|-------|----------|----------|------|------|----------|----------|----------|---|
| chr22 | 50450001 | 50550000 | 688  | 716  | 50500000 | 0.138412 | 0.040239 | 0 |
| chr22 | 50550001 | 50650000 | 736  | 760  | 50600000 | 0.149669 | 0.029381 | 0 |
| chr22 | 50600001 | 50700000 | 828  | 835  | 50650000 | 0.183818 | 0.010159 | 0 |
| chr22 | 50750001 | 50850000 | 596  | 608  | 50800000 | 0.167204 | 0.017382 | 0 |
| chr22 | 50850001 | 50950000 | 739  | 752  | 50900000 | 0.170805 | 0.015523 | 0 |
| chr3  | 250001   | 350000   | 431  | 568  | 3.00E+05 | -0.20224 | 0.005731 | 0 |
| chr3  | 900001   | 1000000  | 417  | 566  | 950000   | -0.24479 | 0.001139 | 0 |
| chr3  | 950001   | 1050000  | 445  | 596  | 1.00E+06 | -0.22554 | 0.002437 | 0 |
| chr3  | 1950001  | 2050000  | 367  | 484  | 2.00E+06 | -0.20326 | 0.005528 | 0 |
| chr3  | 2000001  | 2100000  | 393  | 558  | 2050000  | -0.30977 | 6.10E-05 | 0 |
| chr3  | 2050001  | 2150000  | 417  | 587  | 2100000  | -0.29735 | 0.000111 | 0 |
| chr3  | 2100001  | 2200000  | 427  | 564  | 2150000  | -0.2055  | 0.005108 | 0 |
| chr3  | 2300001  | 2400000  | 412  | 561  | 2350000  | -0.24939 | 0.000942 | 0 |
| chr3  | 2350001  | 2450000  | 437  | 580  | 2400000  | -0.21246 | 0.003974 | 0 |
| chr3  | 2850001  | 2950000  | 497  | 499  | 2900000  | 0.190169 | 0.008189 | 0 |
| chr3  | 2900001  | 3000000  | 522  | 515  | 2950000  | 0.21544  | 0.003282 | 0 |
| chr3  | 3350001  | 3450000  | 454  | 622  | 3400000  | -0.25826 | 0.000649 | 0 |
| chr3  | 3400001  | 3500000  | 435  | 590  | 3450000  | -0.24374 | 0.001189 | 0 |
| chr3  | 3900001  | 4000000  | 362  | 494  | 3950000  | -0.25256 | 0.000826 | 0 |
| chr3  | 4200001  | 4300000  | 413  | 558  | 4250000  | -0.23816 | 0.001488 | 0 |
| chr3  | 4700001  | 4800000  | 769  | 748  | 4750000  | 0.235908 | 0.001464 | 0 |
| chr3  | 5000001  | 5100000  | 683  | 661  | 5050000  | 0.243198 | 0.001083 | 0 |
| chr3  | 5900001  | 6000000  | 394  | 527  | 5950000  | -0.22364 | 0.00262  | 0 |
| chr3  | 5950001  | 6050000  | 399  | 537  | 6.00E+06 | -0.23257 | 0.001856 | 0 |
| chr3  | 6450001  | 6550000  | 386  | 505  | 6500000  | -0.19172 | 0.008236 | 0 |
| chr3  | 7050001  | 7150000  | 413  | 542  | 7100000  | -0.19619 | 0.007073 | 0 |
| chr3  | 7100001  | 7200000  | 384  | 526  | 7150000  | -0.25799 | 0.000657 | 0 |
| chr3  | 7900001  | 8000000  | 405  | 556  | 7950000  | -0.2612  | 0.000573 | 0 |
| chr3  | 7950001  | 8050000  | 464  | 636  | 8.00E+06 | -0.25894 | 0.000631 | 0 |
| chr3  | 8000001  | 8100000  | 465  | 618  | 8050000  | -0.21441 | 0.003699 | 0 |
| chr3  | 8800001  | 8900000  | 675  | 674  | 8850000  | 0.198102 | 0.006206 | 0 |
| chr3  | 9500001  | 9600000  | 616  | 617  | 9550000  | 0.193623 | 0.007266 | 0 |
| chr3  | 9650001  | 9750000  | 821  | 823  | 9700000  | 0.192453 | 0.007568 | 0 |
| chr3  | 9700001  | 9800000  | 1095 | 1076 | 9750000  | 0.221216 | 0.002629 | 0 |
| chr3  | 9750001  | 9850000  | 1112 | 1083 | 9800000  | 0.234087 | 0.001577 | 0 |
| chr3  | 9800001  | 9900000  | 1054 | 1029 | 9850000  | 0.230595 | 0.001816 | 0 |
| chr3  | 9850001  | 9950000  | 923  | 916  | 9900000  | 0.206946 | 0.004508 | 0 |
| chr3  | 9900001  | 10000000 | 1002 | 1000 | 9950000  | 0.198846 | 0.006044 | 0 |
| chr3  | 10000001 | 10100000 | 563  | 557  | 10050000 | 0.211421 | 0.003819 | 0 |
| chr3  | 10050001 | 10150000 | 493  | 487  | 10100000 | 0.213629 | 0.003515 | 0 |
| chr3  | 10100001 | 10200000 | 532  | 530  | 10150000 | 0.201397 | 0.005517 | 0 |
| chr3  | 10150001 | 10250000 | 592  | 576  | 10200000 | 0.235491 | 0.00149  | 0 |
| chr3  | 10200001 | 10300000 | 649  | 647  | 10250000 | 0.200416 | 0.005714 | 0 |
| chr3  | 10250001 | 10350000 | 716  | 676  | 10300000 | 0.278899 | 0.000221 | 0 |
| chr3  | 10300001 | 10400000 | 816  | 732  | 10350000 | 0.352689 | 4.72E-06 | 0 |
| chr3  | 10350001 | 10450000 | 814  | 800  | 10400000 | 0.220992 | 0.002652 | 0 |
| chr3  | 10750001 | 10850000 | 728  | 715  | 10800000 | 0.221958 | 0.002555 | 0 |

|      |          |          |     |     |          |          |          |   |
|------|----------|----------|-----|-----|----------|----------|----------|---|
| chr3 | 12550001 | 12650000 | 688 | 637 | 12600000 | 0.307078 | 5.57E-05 | 0 |
| chr3 | 12600001 | 12700000 | 637 | 609 | 12650000 | 0.260814 | 0.000506 | 0 |
| chr3 | 12650001 | 12750000 | 586 | 554 | 12700000 | 0.276978 | 0.000242 | 0 |
| chr3 | 12700001 | 12800000 | 639 | 592 | 12750000 | 0.306182 | 5.83E-05 | 0 |
| chr3 | 12850001 | 12950000 | 753 | 681 | 12900000 | 0.340958 | 9.15E-06 | 0 |
| chr3 | 13400001 | 13500000 | 647 | 628 | 13450000 | 0.238964 | 0.001292 | 0 |
| chr3 | 13450001 | 13550000 | 629 | 621 | 13500000 | 0.21443  | 0.00341  | 0 |
| chr3 | 13550001 | 13650000 | 774 | 746 | 13600000 | 0.249121 | 0.000843 | 0 |
| chr3 | 15650001 | 15750000 | 655 | 647 | 15700000 | 0.213692 | 0.003507 | 0 |
| chr3 | 17450001 | 17550000 | 445 | 584 | 17500000 | -0.1962  | 0.00707  | 0 |
| chr3 | 17550001 | 17650000 | 431 | 596 | 17600000 | -0.27166 | 0.000363 | 0 |
| chr3 | 17950001 | 18050000 | 448 | 584 | 1.80E+07 | -0.18651 | 0.009802 | 0 |
| chr3 | 18000001 | 18100000 | 461 | 607 | 18050000 | -0.20097 | 0.005993 | 0 |
| chr3 | 18550001 | 18650000 | 416 | 556 | 18600000 | -0.22254 | 0.002732 | 0 |
| chr3 | 18600001 | 18700000 | 448 | 599 | 18650000 | -0.22309 | 0.002675 | 0 |
| chr3 | 18650001 | 18750000 | 445 | 587 | 18700000 | -0.20359 | 0.005465 | 0 |
| chr3 | 19150001 | 19250000 | 427 | 561 | 19200000 | -0.1978  | 0.006691 | 0 |
| chr3 | 19200001 | 19300000 | 409 | 556 | 19250000 | -0.24702 | 0.001039 | 0 |
| chr3 | 19250001 | 19350000 | 411 | 544 | 19300000 | -0.20851 | 0.004586 | 0 |
| chr3 | 19300001 | 19400000 | 378 | 507 | 19350000 | -0.22764 | 0.002248 | 0 |
| chr3 | 19350001 | 19450000 | 360 | 476 | 19400000 | -0.207   | 0.004841 | 0 |
| chr3 | 19550001 | 19650000 | 383 | 559 | 19600000 | -0.34954 | 7.78E-06 | 0 |
| chr3 | 19600001 | 19700000 | 346 | 513 | 19650000 | -0.37222 | 2.20E-06 | 0 |
| chr3 | 19650001 | 19750000 | 372 | 498 | 19700000 | -0.22488 | 0.002499 | 0 |
| chr3 | 19700001 | 19800000 | 421 | 556 | 19750000 | -0.2053  | 0.005143 | 0 |
| chr3 | 20100001 | 20200000 | 424 | 570 | 20150000 | -0.23093 | 0.001979 | 0 |
| chr3 | 20600001 | 20700000 | 362 | 504 | 20650000 | -0.28147 | 0.000233 | 0 |
| chr3 | 20950001 | 21050000 | 381 | 509 | 2.10E+07 | -0.22191 | 0.002797 | 0 |
| chr3 | 21000001 | 21100000 | 373 | 518 | 21050000 | -0.27781 | 0.000275 | 0 |
| chr3 | 21750001 | 21850000 | 391 | 539 | 21800000 | -0.26715 | 0.000442 | 0 |
| chr3 | 21800001 | 21900000 | 369 | 532 | 21850000 | -0.33184 | 1.99E-05 | 0 |
| chr3 | 21850001 | 21950000 | 415 | 555 | 21900000 | -0.22341 | 0.002643 | 0 |
| chr3 | 22250001 | 22350000 | 377 | 514 | 22300000 | -0.25124 | 0.000873 | 0 |
| chr3 | 23500001 | 23600000 | 604 | 603 | 23550000 | 0.198354 | 0.006151 | 0 |
| chr3 | 24050001 | 24150000 | 434 | 599 | 24100000 | -0.2689  | 0.00041  | 0 |
| chr3 | 24750001 | 24850000 | 472 | 625 | 24800000 | -0.20911 | 0.004488 | 0 |
| chr3 | 26100001 | 26200000 | 434 | 589 | 26150000 | -0.24461 | 0.001147 | 0 |
| chr3 | 26150001 | 26250000 | 383 | 532 | 26200000 | -0.27812 | 0.000272 | 0 |
| chr3 | 26650001 | 26750000 | 501 | 663 | 26700000 | -0.20824 | 0.004631 | 0 |
| chr3 | 26700001 | 26800000 | 438 | 580 | 26750000 | -0.20916 | 0.00448  | 0 |
| chr3 | 27450001 | 27550000 | 574 | 562 | 27500000 | 0.226444 | 0.002143 | 0 |
| chr3 | 27500001 | 27600000 | 562 | 565 | 27550000 | 0.188282 | 0.008736 | 0 |
| chr3 | 28150001 | 28250000 | 460 | 604 | 28200000 | -0.19695 | 0.00689  | 0 |
| chr3 | 28650001 | 28750000 | 444 | 601 | 28700000 | -0.24084 | 0.001336 | 0 |
| chr3 | 28700001 | 28800000 | 424 | 576 | 28750000 | -0.24604 | 0.001082 | 0 |
| chr3 | 32950001 | 33050000 | 443 | 578 | 3.30E+07 | -0.1878  | 0.009391 | 0 |
| chr3 | 34250001 | 34350000 | 482 | 638 | 34300000 | -0.20856 | 0.004577 | 0 |

|      |          |          |     |     |          |          |          |   |
|------|----------|----------|-----|-----|----------|----------|----------|---|
| chr3 | 34300001 | 34400000 | 498 | 653 | 34350000 | -0.19497 | 0.007374 | 0 |
| chr3 | 34350001 | 34450000 | 476 | 626 | 34400000 | -0.19924 | 0.006366 | 0 |
| chr3 | 34550001 | 34650000 | 414 | 553 | 34600000 | -0.22169 | 0.002821 | 0 |
| chr3 | 34900001 | 35000000 | 406 | 540 | 34950000 | -0.21552 | 0.003552 | 0 |
| chr3 | 35050001 | 35150000 | 382 | 500 | 35100000 | -0.19239 | 0.00805  | 0 |
| chr3 | 36050001 | 36150000 | 353 | 472 | 36100000 | -0.22316 | 0.002669 | 0 |
| chr3 | 36200001 | 36300000 | 419 | 581 | 36250000 | -0.27562 | 0.000304 | 0 |
| chr3 | 36250001 | 36350000 | 422 | 561 | 36300000 | -0.21479 | 0.003648 | 0 |
| chr3 | 36300001 | 36400000 | 414 | 573 | 36350000 | -0.27294 | 0.000343 | 0 |
| chr3 | 36350001 | 36450000 | 427 | 580 | 36400000 | -0.24585 | 0.00109  | 0 |
| chr3 | 36550001 | 36650000 | 441 | 582 | 36600000 | -0.20428 | 0.005334 | 0 |
| chr3 | 36600001 | 36700000 | 445 | 587 | 36650000 | -0.20359 | 0.005465 | 0 |
| chr3 | 37650001 | 37750000 | 481 | 644 | 37700000 | -0.22506 | 0.002482 | 0 |
| chr3 | 39900001 | 40000000 | 395 | 522 | 39950000 | -0.20623 | 0.004975 | 0 |
| chr3 | 39950001 | 40050000 | 356 | 491 | 4.00E+07 | -0.26788 | 0.000428 | 0 |
| chr3 | 40350001 | 40450000 | 516 | 674 | 40400000 | -0.18941 | 0.008899 | 0 |
| chr3 | 40800001 | 40900000 | 488 | 684 | 40850000 | -0.29115 | 0.000149 | 0 |
| chr3 | 40850001 | 40950000 | 468 | 635 | 40900000 | -0.24429 | 0.001162 | 0 |
| chr3 | 42550001 | 42650000 | 705 | 700 | 42600000 | 0.206231 | 0.004628 | 0 |
| chr3 | 42600001 | 42700000 | 677 | 658 | 42650000 | 0.237031 | 0.001399 | 0 |
| chr3 | 42950001 | 43050000 | 499 | 657 | 4.30E+07 | -0.20089 | 0.006009 | 0 |
| chr3 | 44100001 | 44200000 | 551 | 722 | 44150000 | -0.19398 | 0.007627 | 0 |
| chr3 | 45850001 | 45950000 | 686 | 686 | 45900000 | 0.195963 | 0.006694 | 0 |
| chr3 | 46200001 | 46300000 | 602 | 600 | 46250000 | 0.200764 | 0.005643 | 0 |
| chr3 | 46700001 | 46800000 | 725 | 714 | 46750000 | 0.21802  | 0.002974 | 0 |
| chr3 | 46850001 | 46950000 | 768 | 773 | 46900000 | 0.186601 | 0.00925  | 0 |
| chr3 | 46900001 | 47000000 | 821 | 825 | 46950000 | 0.188951 | 0.008539 | 0 |
| chr3 | 46950001 | 47050000 | 821 | 794 | 4.70E+07 | 0.244206 | 0.001038 | 0 |
| chr3 | 47750001 | 47850000 | 532 | 523 | 47800000 | 0.220578 | 0.002695 | 0 |
| chr3 | 47800001 | 47900000 | 574 | 564 | 47850000 | 0.221319 | 0.002619 | 0 |
| chr3 | 47850001 | 47950000 | 660 | 628 | 47900000 | 0.267665 | 0.000372 | 0 |
| chr3 | 47900001 | 48000000 | 611 | 584 | 47950000 | 0.261167 | 0.000498 | 0 |
| chr3 | 48550001 | 48650000 | 836 | 810 | 48600000 | 0.241544 | 0.00116  | 0 |
| chr3 | 48600001 | 48700000 | 901 | 875 | 48650000 | 0.238207 | 0.001333 | 0 |
| chr3 | 48650001 | 48750000 | 805 | 798 | 48700000 | 0.208563 | 0.004247 | 0 |
| chr3 | 48700001 | 48800000 | 631 | 591 | 48750000 | 0.290445 | 0.000128 | 0 |
| chr3 | 48750001 | 48850000 | 531 | 473 | 48800000 | 0.362835 | 2.62E-06 | 0 |
| chr3 | 48800001 | 48900000 | 539 | 510 | 48850000 | 0.275751 | 0.000257 | 0 |
| chr3 | 49050001 | 49150000 | 647 | 627 | 49100000 | 0.241263 | 0.001174 | 0 |
| chr3 | 49100001 | 49200000 | 676 | 628 | 49150000 | 0.302222 | 7.12E-05 | 0 |
| chr3 | 49150001 | 49250000 | 679 | 653 | 49200000 | 0.252292 | 0.000735 | 0 |
| chr3 | 49200001 | 49300000 | 522 | 523 | 49250000 | 0.193202 | 0.007373 | 0 |
| chr3 | 49400001 | 49500000 | 623 | 583 | 49450000 | 0.291699 | 0.00012  | 0 |
| chr3 | 49450001 | 49550000 | 619 | 534 | 49500000 | 0.409063 | 1.51E-07 | 0 |
| chr3 | 49650001 | 49750000 | 746 | 751 | 49700000 | 0.186326 | 0.009337 | 0 |
| chr3 | 49700001 | 49800000 | 695 | 683 | 49750000 | 0.22109  | 0.002642 | 0 |
| chr3 | 49750001 | 49850000 | 752 | 681 | 49800000 | 0.339041 | 1.02E-05 | 0 |



|      |          |          |     |     |          |          |          |   |
|------|----------|----------|-----|-----|----------|----------|----------|---|
| chr3 | 49800001 | 49900000 | 739 | 639 | 49850000 | 0.405721 | 1.87E-07 | 0 |
| chr3 | 49850001 | 49950000 | 747 | 731 | 49900000 | 0.2272   | 0.002079 | 0 |
| chr3 | 50150001 | 50250000 | 831 | 809 | 50200000 | 0.234672 | 0.00154  | 0 |
| chr3 | 50200001 | 50300000 | 832 | 809 | 50250000 | 0.236407 | 0.001435 | 0 |
| chr3 | 50250001 | 50350000 | 769 | 750 | 50300000 | 0.232056 | 0.001712 | 0 |
| chr3 | 50300001 | 50400000 | 770 | 694 | 50350000 | 0.345886 | 6.94E-06 | 0 |
| chr3 | 50350001 | 50450000 | 843 | 800 | 50400000 | 0.271496 | 0.000312 | 0 |
| chr3 | 50400001 | 50500000 | 870 | 867 | 50450000 | 0.200946 | 0.005607 | 0 |
| chr3 | 50450001 | 50550000 | 858 | 846 | 50500000 | 0.216283 | 0.003179 | 0 |
| chr3 | 50600001 | 50700000 | 852 | 857 | 50650000 | 0.187521 | 0.008966 | 0 |
| chr3 | 50650001 | 50750000 | 735 | 721 | 50700000 | 0.223708 | 0.002386 | 0 |
| chr3 | 51350001 | 51450000 | 621 | 614 | 51400000 | 0.212318 | 0.003693 | 0 |
| chr3 | 51400001 | 51500000 | 603 | 564 | 51450000 | 0.292426 | 0.000116 | 0 |
| chr3 | 51700001 | 51800000 | 691 | 695 | 51750000 | 0.187636 | 0.008931 | 0 |
| chr3 | 51950001 | 52050000 | 775 | 718 | 5.20E+07 | 0.306176 | 5.83E-05 | 0 |
| chr3 | 52000001 | 52100000 | 827 | 792 | 52050000 | 0.25835  | 0.000564 | 0 |
| chr3 | 52050001 | 52150000 | 911 | 908 | 52100000 | 0.200722 | 0.005652 | 0 |
| chr3 | 52200001 | 52300000 | 779 | 776 | 52250000 | 0.20153  | 0.00549  | 0 |
| chr3 | 52250001 | 52350000 | 851 | 802 | 52300000 | 0.28152  | 0.000196 | 0 |
| chr3 | 52450001 | 52550000 | 826 | 801 | 52500000 | 0.240303 | 0.001222 | 0 |
| chr3 | 52700001 | 52800000 | 663 | 606 | 52750000 | 0.325654 | 2.11E-05 | 0 |
| chr3 | 52750001 | 52850000 | 733 | 701 | 52800000 | 0.260362 | 0.000516 | 0 |
| chr3 | 53150001 | 53250000 | 808 | 810 | 53200000 | 0.192396 | 0.007583 | 0 |
| chr3 | 53200001 | 53300000 | 797 | 782 | 53250000 | 0.223374 | 0.002417 | 0 |
| chr3 | 53250001 | 53350000 | 705 | 696 | 53300000 | 0.214499 | 0.003401 | 0 |
| chr3 | 53300001 | 53400000 | 622 | 607 | 53350000 | 0.231181 | 0.001774 | 0 |
| chr3 | 53350001 | 53450000 | 535 | 534 | 53400000 | 0.198662 | 0.006084 | 0 |
| chr3 | 53950001 | 54050000 | 481 | 634 | 5.40E+07 | -0.20248 | 0.005683 | 0 |
| chr3 | 57500001 | 57600000 | 540 | 541 | 57550000 | 0.193294 | 0.00735  | 0 |
| chr3 | 57550001 | 57650000 | 538 | 541 | 57600000 | 0.187941 | 0.008838 | 0 |
| chr3 | 58050001 | 58150000 | 742 | 733 | 58100000 | 0.213569 | 0.003523 | 0 |
| chr3 | 58250001 | 58350000 | 619 | 611 | 58300000 | 0.21473  | 0.003372 | 0 |
| chr3 | 59100001 | 59200000 | 426 | 556 | 59150000 | -0.18827 | 0.009246 | 0 |
| chr3 | 59800001 | 59900000 | 460 | 605 | 59850000 | -0.19934 | 0.006343 | 0 |
| chr3 | 59850001 | 59950000 | 443 | 583 | 59900000 | -0.20023 | 0.00615  | 0 |
| chr3 | 60400001 | 60500000 | 288 | 416 | 60450000 | -0.33455 | 1.73E-05 | 0 |
| chr3 | 60450001 | 60550000 | 213 | 281 | 60500000 | -0.20375 | 0.005434 | 0 |
| chr3 | 60600001 | 60700000 | 241 | 321 | 60650000 | -0.21758 | 0.003291 | 0 |
| chr3 | 61250001 | 61350000 | 414 | 541 | 61300000 | -0.19003 | 0.008716 | 0 |
| chr3 | 61350001 | 61450000 | 334 | 447 | 61400000 | -0.22446 | 0.002539 | 0 |
| chr3 | 61400001 | 61500000 | 386 | 505 | 61450000 | -0.19172 | 0.008236 | 0 |
| chr3 | 61500001 | 61600000 | 448 | 613 | 61550000 | -0.25643 | 0.000702 | 0 |
| chr3 | 62750001 | 62850000 | 426 | 563 | 62800000 | -0.20632 | 0.00496  | 0 |
| chr3 | 63100001 | 63200000 | 435 | 579 | 63150000 | -0.21658 | 0.003414 | 0 |
| chr3 | 63550001 | 63650000 | 401 | 548 | 63600000 | -0.25461 | 0.000758 | 0 |
| chr3 | 63850001 | 63950000 | 619 | 585 | 63900000 | 0.277466 | 0.000237 | 0 |
| chr3 | 63900001 | 64000000 | 618 | 619 | 63950000 | 0.19363  | 0.007264 | 0 |

|      |          |          |     |     |          |          |          |   |
|------|----------|----------|-----|-----|----------|----------|----------|---|
| chr3 | 64950001 | 65050000 | 396 | 527 | 6.50E+07 | -0.21634 | 0.003445 | 0 |
| chr3 | 66050001 | 66150000 | 465 | 618 | 66100000 | -0.21441 | 0.003699 | 0 |
| chr3 | 66100001 | 66200000 | 318 | 467 | 66150000 | -0.35843 | 4.78E-06 | 0 |
| chr3 | 66150001 | 66250000 | 98  | 156 | 66200000 | -0.47473 | 3.43E-09 | 0 |
| chr3 | 66200001 | 66300000 | 185 | 181 | 66250000 | 0.227499 | 0.002055 | 0 |
| chr3 | 66800001 | 66900000 | 399 | 528 | 66850000 | -0.20819 | 0.004639 | 0 |
| chr3 | 67900001 | 68000000 | 447 | 593 | 67950000 | -0.21179 | 0.004071 | 0 |
| chr3 | 67950001 | 68050000 | 407 | 553 | 6.80E+07 | -0.24629 | 0.001071 | 0 |
| chr3 | 68750001 | 68850000 | 454 | 619 | 68800000 | -0.25128 | 0.000871 | 0 |
| chr3 | 68800001 | 68900000 | 371 | 503 | 68850000 | -0.24318 | 0.001216 | 0 |
| chr3 | 69750001 | 69850000 | 638 | 642 | 69800000 | 0.186946 | 0.009142 | 0 |
| chr3 | 69800001 | 69900000 | 643 | 631 | 69850000 | 0.223142 | 0.00244  | 0 |
| chr3 | 70500001 | 70600000 | 497 | 654 | 70550000 | -0.20008 | 0.006181 | 0 |
| chr3 | 72450001 | 72550000 | 634 | 636 | 72500000 | 0.191419 | 0.007844 | 0 |
| chr3 | 72700001 | 72800000 | 543 | 545 | 72750000 | 0.190659 | 0.008052 | 0 |
| chr3 | 73750001 | 73850000 | 416 | 547 | 73800000 | -0.19899 | 0.00642  | 0 |
| chr3 | 74000001 | 74100000 | 425 | 565 | 74050000 | -0.21482 | 0.003644 | 0 |
| chr3 | 74150001 | 74250000 | 366 | 493 | 74200000 | -0.23378 | 0.00177  | 0 |
| chr3 | 74250001 | 74350000 | 368 | 515 | 74300000 | -0.2889  | 0.000166 | 0 |
| chr3 | 74300001 | 74400000 | 368 | 512 | 74350000 | -0.28048 | 0.000244 | 0 |
| chr3 | 74350001 | 74450000 | 381 | 513 | 74400000 | -0.2332  | 0.001811 | 0 |
| chr3 | 74400001 | 74500000 | 394 | 543 | 74450000 | -0.26679 | 0.000449 | 0 |
| chr3 | 74550001 | 74650000 | 384 | 563 | 74600000 | -0.35607 | 5.45E-06 | 0 |
| chr3 | 74600001 | 74700000 | 410 | 546 | 74650000 | -0.21731 | 0.003323 | 0 |
| chr3 | 74700001 | 74800000 | 377 | 507 | 74750000 | -0.23146 | 0.001939 | 0 |
| chr3 | 74750001 | 74850000 | 379 | 519 | 74800000 | -0.25757 | 0.000669 | 0 |
| chr3 | 75100001 | 75200000 | 340 | 463 | 75150000 | -0.24951 | 0.000938 | 0 |
| chr3 | 75150001 | 75250000 | 393 | 520 | 75200000 | -0.20802 | 0.004667 | 0 |
| chr3 | 75300001 | 75400000 | 213 | 301 | 75350000 | -0.30295 | 8.51E-05 | 0 |
| chr3 | 75400001 | 75500000 | 131 | 120 | 75450000 | 0.322495 | 2.50E-05 | 0 |
| chr3 | 75450001 | 75550000 | 105 | 104 | 75500000 | 0.209769 | 0.004062 | 0 |
| chr3 | 75550001 | 75650000 | 92  | 91  | 75600000 | 0.21173  | 0.003775 | 0 |
| chr3 | 76250001 | 76350000 | 391 | 521 | 76300000 | -0.21815 | 0.003221 | 0 |
| chr3 | 76300001 | 76400000 | 408 | 567 | 76350000 | -0.27882 | 0.000263 | 0 |
| chr3 | 76550001 | 76650000 | 406 | 549 | 76600000 | -0.23936 | 0.001418 | 0 |
| chr3 | 76600001 | 76700000 | 406 | 540 | 76650000 | -0.21552 | 0.003552 | 0 |
| chr3 | 77500001 | 77600000 | 451 | 629 | 77550000 | -0.28397 | 0.000208 | 0 |
| chr3 | 77700001 | 77800000 | 426 | 556 | 77750000 | -0.18827 | 0.009246 | 0 |
| chr3 | 77750001 | 77850000 | 388 | 507 | 77800000 | -0.18997 | 0.008736 | 0 |
| chr3 | 78150001 | 78250000 | 424 | 581 | 78200000 | -0.25851 | 0.000642 | 0 |
| chr3 | 78200001 | 78300000 | 432 | 571 | 78250000 | -0.2065  | 0.004929 | 0 |
| chr3 | 79700001 | 79800000 | 423 | 555 | 79750000 | -0.19587 | 0.007151 | 0 |
| chr3 | 80100001 | 80200000 | 416 | 549 | 80150000 | -0.20426 | 0.005337 | 0 |
| chr3 | 80950001 | 81050000 | 390 | 541 | 8.10E+07 | -0.27619 | 0.000296 | 0 |
| chr3 | 83100001 | 83200000 | 349 | 476 | 83150000 | -0.25177 | 0.000854 | 0 |
| chr3 | 83450001 | 83550000 | 372 | 505 | 83500000 | -0.24502 | 0.001128 | 0 |
| chr3 | 83750001 | 83850000 | 378 | 497 | 83800000 | -0.1989  | 0.006442 | 0 |

|      |          |          |     |     |          |          |          |   |
|------|----------|----------|-----|-----|----------|----------|----------|---|
| chr3 | 84200001 | 84300000 | 354 | 478 | 84250000 | -0.2373  | 0.00154  | 0 |
| chr3 | 84400001 | 84500000 | 321 | 460 | 84450000 | -0.3231  | 3.13E-05 | 0 |
| chr3 | 84450001 | 84550000 | 330 | 488 | 84500000 | -0.36845 | 2.73E-06 | 0 |
| chr3 | 84500001 | 84600000 | 343 | 486 | 84550000 | -0.30678 | 7.06E-05 | 0 |
| chr3 | 84550001 | 84650000 | 360 | 478 | 84600000 | -0.21305 | 0.003889 | 0 |
| chr3 | 84700001 | 84800000 | 378 | 495 | 84750000 | -0.19308 | 0.007865 | 0 |
| chr3 | 84850001 | 84950000 | 310 | 441 | 84900000 | -0.31255 | 5.31E-05 | 0 |
| chr3 | 84900001 | 85000000 | 329 | 456 | 84950000 | -0.27498 | 0.000313 | 0 |
| chr3 | 84950001 | 85050000 | 355 | 487 | 8.50E+07 | -0.26014 | 0.000599 | 0 |
| chr3 | 85150001 | 85250000 | 296 | 454 | 85200000 | -0.42113 | 1.17E-07 | 0 |
| chr3 | 85200001 | 85300000 | 331 | 455 | 85250000 | -0.26307 | 0.000528 | 0 |
| chr3 | 85400001 | 85500000 | 358 | 509 | 85450000 | -0.31174 | 5.53E-05 | 0 |
| chr3 | 85450001 | 85550000 | 391 | 519 | 85500000 | -0.2126  | 0.003953 | 0 |
| chr3 | 85600001 | 85700000 | 392 | 526 | 85650000 | -0.22825 | 0.002196 | 0 |
| chr3 | 85650001 | 85750000 | 366 | 550 | 85700000 | -0.39162 | 7.12E-07 | 0 |
| chr3 | 85700001 | 85800000 | 347 | 502 | 85750000 | -0.33679 | 1.54E-05 | 0 |
| chr3 | 85750001 | 85850000 | 357 | 470 | 85800000 | -0.20077 | 0.006034 | 0 |
| chr3 | 86150001 | 86250000 | 392 | 514 | 86200000 | -0.19495 | 0.007379 | 0 |
| chr3 | 86300001 | 86400000 | 392 | 512 | 86350000 | -0.18933 | 0.008925 | 0 |
| chr3 | 86700001 | 86800000 | 398 | 526 | 86750000 | -0.20633 | 0.004958 | 0 |
| chr3 | 87450001 | 87550000 | 409 | 543 | 87500000 | -0.21289 | 0.003912 | 0 |
| chr3 | 87500001 | 87600000 | 392 | 549 | 87550000 | -0.28999 | 0.000157 | 0 |
| chr3 | 87550001 | 87650000 | 385 | 559 | 87600000 | -0.34203 | 1.17E-05 | 0 |
| chr3 | 87600001 | 87700000 | 408 | 551 | 87650000 | -0.23752 | 0.001526 | 0 |
| chr3 | 87650001 | 87750000 | 404 | 551 | 87700000 | -0.25173 | 0.000855 | 0 |
| chr3 | 87700001 | 87800000 | 392 | 516 | 87750000 | -0.20055 | 0.00608  | 0 |
| chr3 | 87800001 | 87900000 | 410 | 536 | 87850000 | -0.19065 | 0.008539 | 0 |
| chr3 | 87850001 | 87950000 | 374 | 494 | 87900000 | -0.20551 | 0.005105 | 0 |
| chr3 | 87900001 | 88000000 | 354 | 472 | 87950000 | -0.21907 | 0.003112 | 0 |
| chr3 | 87950001 | 88050000 | 403 | 528 | 8.80E+07 | -0.1938  | 0.007676 | 0 |
| chr3 | 88450001 | 88550000 | 415 | 545 | 88500000 | -0.19718 | 0.006835 | 0 |
| chr3 | 88500001 | 88600000 | 348 | 485 | 88550000 | -0.28293 | 0.000218 | 0 |
| chr3 | 89200001 | 89300000 | 409 | 539 | 89250000 | -0.20222 | 0.005735 | 0 |
| chr3 | 89250001 | 89350000 | 411 | 571 | 89300000 | -0.27839 | 0.000268 | 0 |
| chr3 | 89300001 | 89400000 | 398 | 529 | 89350000 | -0.21454 | 0.003683 | 0 |
| chr3 | 89400001 | 89500000 | 380 | 501 | 89450000 | -0.20285 | 0.00561  | 0 |
| chr3 | 89450001 | 89550000 | 362 | 477 | 89500000 | -0.20204 | 0.005773 | 0 |
| chr3 | 89850001 | 89950000 | 311 | 443 | 89900000 | -0.31443 | 4.84E-05 | 0 |
| chr3 | 89950001 | 90050000 | 324 | 423 | 9.00E+07 | -0.1887  | 0.009114 | 0 |
| chr3 | 90000001 | 90100000 | 369 | 514 | 90050000 | -0.28218 | 0.000226 | 0 |
| chr3 | 90200001 | 90300000 | 143 | 200 | 90250000 | -0.28802 | 0.000173 | 0 |
| chr3 | 90250001 | 90350000 | 211 | 285 | 90300000 | -0.23776 | 0.001512 | 0 |
| chr3 | 90500001 | 90600000 | 26  | 25  | 90550000 | 0.252547 | 0.000727 | 0 |
| chr3 | 93450001 | 93550000 | 138 | 188 | 93500000 | -0.2501  | 0.000915 | 0 |
| chr3 | 93950001 | 94050000 | 613 | 800 | 9.40E+07 | -0.18815 | 0.009282 | 0 |
| chr3 | 94000001 | 94100000 | 597 | 797 | 94050000 | -0.22089 | 0.002908 | 0 |
| chr3 | 94050001 | 94150000 | 597 | 808 | 94100000 | -0.24066 | 0.001346 | 0 |

|      |          |          |     |      |          |          |          |   |
|------|----------|----------|-----|------|----------|----------|----------|---|
| chr3 | 94250001 | 94350000 | 592 | 772  | 94300000 | -0.18704 | 0.009631 | 0 |
| chr3 | 94300001 | 94400000 | 488 | 723  | 94350000 | -0.37115 | 2.34E-06 | 0 |
| chr3 | 94350001 | 94450000 | 515 | 699  | 94400000 | -0.24476 | 0.00114  | 0 |
| chr3 | 94750001 | 94850000 | 541 | 709  | 94800000 | -0.19419 | 0.007573 | 0 |
| chr3 | 95050001 | 95150000 | 382 | 521  | 95100000 | -0.25175 | 0.000854 | 0 |
| chr3 | 95100001 | 95200000 | 364 | 541  | 95150000 | -0.37573 | 1.80E-06 | 0 |
| chr3 | 95150001 | 95250000 | 363 | 503  | 95200000 | -0.27463 | 0.000318 | 0 |
| chr3 | 95500001 | 95600000 | 317 | 430  | 95550000 | -0.24389 | 0.001181 | 0 |
| chr3 | 95550001 | 95650000 | 331 | 466  | 95600000 | -0.29754 | 0.00011  | 0 |
| chr3 | 95600001 | 95700000 | 361 | 515  | 95650000 | -0.31661 | 4.34E-05 | 0 |
| chr3 | 95650001 | 95750000 | 367 | 532  | 95700000 | -0.33968 | 1.32E-05 | 0 |
| chr3 | 95700001 | 95800000 | 359 | 523  | 95750000 | -0.34686 | 8.99E-06 | 0 |
| chr3 | 95750001 | 95850000 | 358 | 476  | 95800000 | -0.21504 | 0.003615 | 0 |
| chr3 | 95800001 | 95900000 | 343 | 479  | 95850000 | -0.28585 | 0.000191 | 0 |
| chr3 | 95850001 | 95950000 | 359 | 513  | 95900000 | -0.31901 | 3.85E-05 | 0 |
| chr3 | 95950001 | 96050000 | 374 | 501  | 9.60E+07 | -0.22581 | 0.002412 | 0 |
| chr3 | 96000001 | 96100000 | 322 | 467  | 96050000 | -0.3404  | 1.27E-05 | 0 |
| chr3 | 96150001 | 96250000 | 403 | 540  | 96200000 | -0.22622 | 0.002375 | 0 |
| chr3 | 96250001 | 96350000 | 305 | 412  | 96300000 | -0.23787 | 0.001505 | 0 |
| chr3 | 96300001 | 96400000 | 287 | 423  | 96350000 | -0.36364 | 3.58E-06 | 0 |
| chr3 | 96350001 | 96450000 | 331 | 450  | 96400000 | -0.24713 | 0.001035 | 0 |
| chr3 | 96400001 | 96500000 | 376 | 504  | 96450000 | -0.22673 | 0.002328 | 0 |
| chr3 | 96850001 | 96950000 | 387 | 520  | 96900000 | -0.23022 | 0.002035 | 0 |
| chr3 | 97600001 | 97700000 | 605 | 605  | 97650000 | 0.195963 | 0.006694 | 0 |
| chr3 | 97650001 | 97750000 | 646 | 634  | 97700000 | 0.223014 | 0.002452 | 0 |
| chr3 | 98000001 | 98100000 | 481 | 479  | 98050000 | 0.201974 | 0.005403 | 0 |
| chr3 | 98850001 | 98950000 | 399 | 568  | 98900000 | -0.31354 | 5.06E-05 | 0 |
| chr3 | 99250001 | 99350000 | 737 | 975  | 99300000 | -0.20777 | 0.004708 | 0 |
| chr3 | 1.01E+08 | 1.01E+08 | 760 | 757  | 1.01E+08 | 0.201669 | 0.005463 | 0 |
| chr3 | 1.02E+08 | 1.02E+08 | 703 | 957  | 1.02E+08 | -0.24903 | 0.000957 | 0 |
| chr3 | 1.02E+08 | 1.02E+08 | 708 | 946  | 1.02E+08 | -0.22213 | 0.002775 | 0 |
| chr3 | 1.03E+08 | 1.03E+08 | 646 | 855  | 1.03E+08 | -0.20843 | 0.004599 | 0 |
| chr3 | 1.05E+08 | 1.05E+08 | 647 | 876  | 1.05E+08 | -0.2412  | 0.001317 | 0 |
| chr3 | 1.05E+08 | 1.05E+08 | 665 | 887  | 1.05E+08 | -0.21962 | 0.00305  | 0 |
| chr3 | 1.05E+08 | 1.05E+08 | 655 | 898  | 1.05E+08 | -0.25926 | 0.000622 | 0 |
| chr3 | 1.05E+08 | 1.05E+08 | 649 | 856  | 1.05E+08 | -0.20343 | 0.005496 | 0 |
| chr3 | 1.05E+08 | 1.05E+08 | 706 | 924  | 1.05E+08 | -0.19226 | 0.008086 | 0 |
| chr3 | 1.06E+08 | 1.06E+08 | 674 | 909  | 1.06E+08 | -0.23557 | 0.001649 | 0 |
| chr3 | 1.06E+08 | 1.06E+08 | 673 | 880  | 1.06E+08 | -0.19093 | 0.008457 | 0 |
| chr3 | 1.07E+08 | 1.07E+08 | 687 | 905  | 1.07E+08 | -0.20164 | 0.005853 | 0 |
| chr3 | 1.09E+08 | 1.09E+08 | 602 | 801  | 1.09E+08 | -0.21608 | 0.003479 | 0 |
| chr3 | 1.09E+08 | 1.09E+08 | 588 | 783  | 1.09E+08 | -0.21723 | 0.003333 | 0 |
| chr3 | 1.1E+08  | 1.1E+08  | 626 | 829  | 1.1E+08  | -0.20925 | 0.004466 | 0 |
| chr3 | 1.13E+08 | 1.13E+08 | 829 | 830  | 1.13E+08 | 0.194224 | 0.007115 | 0 |
| chr3 | 1.14E+08 | 1.14E+08 | 751 | 980  | 1.14E+08 | -0.18801 | 0.009327 | 0 |
| chr3 | 1.15E+08 | 1.15E+08 | 768 | 1017 | 1.15E+08 | -0.20918 | 0.004477 | 0 |
| chr3 | 1.16E+08 | 1.16E+08 | 582 | 812  | 1.16E+08 | -0.2845  | 0.000203 | 0 |

|      |          |          |      |      |          |          |          |   |
|------|----------|----------|------|------|----------|----------|----------|---|
| chr3 | 1.16E+08 | 1.16E+08 | 598  | 817  | 1.16E+08 | -0.25423 | 0.00077  | 0 |
| chr3 | 1.16E+08 | 1.17E+08 | 564  | 772  | 1.17E+08 | -0.25694 | 0.000687 | 0 |
| chr3 | 1.17E+08 | 1.17E+08 | 576  | 787  | 1.17E+08 | -0.25433 | 0.000767 | 0 |
| chr3 | 1.18E+08 | 1.18E+08 | 609  | 798  | 1.18E+08 | -0.19398 | 0.007627 | 0 |
| chr3 | 1.18E+08 | 1.18E+08 | 624  | 818  | 1.18E+08 | -0.19459 | 0.007471 | 0 |
| chr3 | 1.18E+08 | 1.18E+08 | 591  | 819  | 1.18E+08 | -0.27474 | 0.000316 | 0 |
| chr3 | 1.18E+08 | 1.18E+08 | 635  | 837  | 1.18E+08 | -0.20251 | 0.005678 | 0 |
| chr3 | 1.18E+08 | 1.19E+08 | 675  | 881  | 1.18E+08 | -0.18829 | 0.009239 | 0 |
| chr3 | 1.24E+08 | 1.24E+08 | 682  | 684  | 1.24E+08 | 0.191738 | 0.007758 | 0 |
| chr3 | 1.26E+08 | 1.26E+08 | 1104 | 1109 | 1.26E+08 | 0.189444 | 0.008396 | 0 |
| chr3 | 1.27E+08 | 1.27E+08 | 1183 | 1187 | 1.27E+08 | 0.191093 | 0.007933 | 0 |
| chr3 | 1.27E+08 | 1.27E+08 | 1187 | 1131 | 1.27E+08 | 0.265684 | 0.000407 | 0 |
| chr3 | 1.27E+08 | 1.27E+08 | 1175 | 1175 | 1.27E+08 | 0.195963 | 0.006694 | 0 |
| chr3 | 1.28E+08 | 1.28E+08 | 1077 | 1014 | 1.28E+08 | 0.282924 | 0.000183 | 0 |
| chr3 | 1.28E+08 | 1.28E+08 | 1095 | 1029 | 1.28E+08 | 0.285651 | 0.000161 | 0 |
| chr3 | 1.28E+08 | 1.28E+08 | 891  | 874  | 1.28E+08 | 0.223755 | 0.002382 | 0 |
| chr3 | 1.28E+08 | 1.28E+08 | 821  | 774  | 1.28E+08 | 0.281012 | 0.0002   | 0 |
| chr3 | 1.28E+08 | 1.29E+08 | 908  | 866  | 1.28E+08 | 0.264288 | 0.000433 | 0 |
| chr3 | 1.29E+08 | 1.29E+08 | 1051 | 1042 | 1.29E+08 | 0.20837  | 0.004278 | 0 |
| chr3 | 1.31E+08 | 1.31E+08 | 649  | 867  | 1.31E+08 | -0.22185 | 0.002804 | 0 |
| chr3 | 1.32E+08 | 1.32E+08 | 627  | 830  | 1.32E+08 | -0.20868 | 0.004557 | 0 |
| chr3 | 1.35E+08 | 1.35E+08 | 593  | 809  | 1.35E+08 | -0.25214 | 0.00084  | 0 |
| chr3 | 1.35E+08 | 1.35E+08 | 517  | 681  | 1.35E+08 | -0.20153 | 0.005877 | 0 |
| chr3 | 1.39E+08 | 1.39E+08 | 681  | 911  | 1.39E+08 | -0.22383 | 0.002601 | 0 |
| chr3 | 1.4E+08  | 1.4E+08  | 674  | 898  | 1.4E+08  | -0.218   | 0.003239 | 0 |
| chr3 | 1.4E+08  | 1.41E+08 | 768  | 1032 | 1.4E+08  | -0.2303  | 0.002028 | 0 |
| chr3 | 1.41E+08 | 1.41E+08 | 674  | 936  | 1.41E+08 | -0.2778  | 0.000276 | 0 |
| chr3 | 1.41E+08 | 1.41E+08 | 1107 | 1070 | 1.41E+08 | 0.245007 | 0.001004 | 0 |
| chr3 | 1.41E+08 | 1.41E+08 | 1097 | 1089 | 1.41E+08 | 0.206523 | 0.004579 | 0 |
| chr3 | 1.42E+08 | 1.42E+08 | 775  | 1012 | 1.42E+08 | -0.18898 | 0.00903  | 0 |
| chr3 | 1.44E+08 | 1.44E+08 | 703  | 918  | 1.44E+08 | -0.18901 | 0.009021 | 0 |
| chr3 | 1.45E+08 | 1.45E+08 | 620  | 825  | 1.45E+08 | -0.21616 | 0.003468 | 0 |
| chr3 | 1.46E+08 | 1.46E+08 | 638  | 850  | 1.46E+08 | -0.21794 | 0.003246 | 0 |
| chr3 | 1.46E+08 | 1.46E+08 | 603  | 821  | 1.46E+08 | -0.24926 | 0.000947 | 0 |
| chr3 | 1.47E+08 | 1.47E+08 | 585  | 766  | 1.47E+08 | -0.19294 | 0.007901 | 0 |
| chr3 | 1.47E+08 | 1.47E+08 | 554  | 752  | 1.47E+08 | -0.24488 | 0.001134 | 0 |
| chr3 | 1.48E+08 | 1.48E+08 | 615  | 809  | 1.48E+08 | -0.19959 | 0.006288 | 0 |
| chr3 | 1.48E+08 | 1.48E+08 | 617  | 819  | 1.48E+08 | -0.21263 | 0.003949 | 0 |
| chr3 | 1.5E+08  | 1.5E+08  | 832  | 1088 | 1.5E+08  | -0.19106 | 0.008421 | 0 |
| chr3 | 1.5E+08  | 1.5E+08  | 1000 | 994  | 1.5E+08  | 0.204645 | 0.004904 | 0 |
| chr3 | 1.52E+08 | 1.52E+08 | 933  | 926  | 1.52E+08 | 0.206828 | 0.004528 | 0 |
| chr3 | 1.54E+08 | 1.54E+08 | 603  | 793  | 1.54E+08 | -0.1992  | 0.006374 | 0 |
| chr3 | 1.54E+08 | 1.54E+08 | 535  | 709  | 1.54E+08 | -0.21028 | 0.004301 | 0 |
| chr3 | 1.54E+08 | 1.54E+08 | 641  | 841  | 1.54E+08 | -0.19582 | 0.007163 | 0 |
| chr3 | 1.54E+08 | 1.54E+08 | 608  | 876  | 1.54E+08 | -0.3309  | 2.09E-05 | 0 |
| chr3 | 1.54E+08 | 1.55E+08 | 605  | 823  | 1.54E+08 | -0.24799 | 0.000998 | 0 |
| chr3 | 1.55E+08 | 1.55E+08 | 633  | 848  | 1.55E+08 | -0.2259  | 0.002404 | 0 |

|      |          |          |      |      |          |          |          |   |
|------|----------|----------|------|------|----------|----------|----------|---|
| chr3 | 1.57E+08 | 1.57E+08 | 627  | 824  | 1.57E+08 | -0.19822 | 0.006595 | 0 |
| chr3 | 1.57E+08 | 1.57E+08 | 677  | 897  | 1.57E+08 | -0.20999 | 0.004347 | 0 |
| chr3 | 1.59E+08 | 1.59E+08 | 772  | 1030 | 1.59E+08 | -0.22001 | 0.003005 | 0 |
| chr3 | 1.6E+08  | 1.6E+08  | 744  | 729  | 1.6E+08  | 0.225347 | 0.002237 | 0 |
| chr3 | 1.61E+08 | 1.61E+08 | 570  | 758  | 1.61E+08 | -0.21527 | 0.003584 | 0 |
| chr3 | 1.61E+08 | 1.62E+08 | 590  | 784  | 1.62E+08 | -0.21418 | 0.003732 | 0 |
| chr3 | 1.62E+08 | 1.62E+08 | 575  | 753  | 1.62E+08 | -0.19312 | 0.007853 | 0 |
| chr3 | 1.62E+08 | 1.62E+08 | 519  | 754  | 1.62E+08 | -0.34287 | 1.11E-05 | 0 |
| chr3 | 1.62E+08 | 1.62E+08 | 523  | 720  | 1.62E+08 | -0.26522 | 0.000481 | 0 |
| chr3 | 1.62E+08 | 1.62E+08 | 545  | 714  | 1.62E+08 | -0.1937  | 0.0077   | 0 |
| chr3 | 1.62E+08 | 1.63E+08 | 363  | 477  | 1.63E+08 | -0.19806 | 0.006632 | 0 |
| chr3 | 1.63E+08 | 1.63E+08 | 77   | 76   | 1.63E+08 | 0.214822 | 0.00336  | 0 |
| chr3 | 1.63E+08 | 1.64E+08 | 594  | 786  | 1.63E+08 | -0.2081  | 0.004653 | 0 |
| chr3 | 1.64E+08 | 1.64E+08 | 529  | 706  | 1.64E+08 | -0.22044 | 0.002957 | 0 |
| chr3 | 1.64E+08 | 1.64E+08 | 511  | 706  | 1.64E+08 | -0.27038 | 0.000384 | 0 |
| chr3 | 1.64E+08 | 1.64E+08 | 522  | 703  | 1.64E+08 | -0.23351 | 0.001789 | 0 |
| chr3 | 1.64E+08 | 1.64E+08 | 575  | 778  | 1.64E+08 | -0.24025 | 0.001369 | 0 |
| chr3 | 1.64E+08 | 1.64E+08 | 524  | 687  | 1.64E+08 | -0.19478 | 0.007423 | 0 |
| chr3 | 1.64E+08 | 1.64E+08 | 560  | 742  | 1.64E+08 | -0.21003 | 0.004341 | 0 |
| chr3 | 1.64E+08 | 1.65E+08 | 568  | 787  | 1.64E+08 | -0.27451 | 0.00032  | 0 |
| chr3 | 1.64E+08 | 1.65E+08 | 553  | 753  | 1.65E+08 | -0.24941 | 0.000942 | 0 |
| chr3 | 1.65E+08 | 1.65E+08 | 561  | 734  | 1.65E+08 | -0.19182 | 0.008209 | 0 |
| chr3 | 1.65E+08 | 1.65E+08 | 586  | 795  | 1.65E+08 | -0.24409 | 0.001172 | 0 |
| chr3 | 1.67E+08 | 1.67E+08 | 635  | 828  | 1.67E+08 | -0.18691 | 0.009672 | 0 |
| chr3 | 1.67E+08 | 1.67E+08 | 598  | 796  | 1.67E+08 | -0.21666 | 0.003405 | 0 |
| chr3 | 1.67E+08 | 1.67E+08 | 589  | 772  | 1.67E+08 | -0.19437 | 0.007527 | 0 |
| chr3 | 1.72E+08 | 1.72E+08 | 1038 | 1044 | 1.72E+08 | 0.187648 | 0.008927 | 0 |
| chr3 | 1.72E+08 | 1.72E+08 | 938  | 928  | 1.72E+08 | 0.211426 | 0.003818 | 0 |
| chr3 | 1.72E+08 | 1.73E+08 | 905  | 886  | 1.72E+08 | 0.226574 | 0.002132 | 0 |
| chr3 | 1.72E+08 | 1.73E+08 | 897  | 870  | 1.73E+08 | 0.240056 | 0.001235 | 0 |
| chr3 | 1.73E+08 | 1.73E+08 | 638  | 871  | 1.73E+08 | -0.25315 | 0.000806 | 0 |
| chr3 | 1.75E+08 | 1.75E+08 | 618  | 807  | 1.75E+08 | -0.189   | 0.009023 | 0 |
| chr3 | 1.75E+08 | 1.75E+08 | 645  | 848  | 1.75E+08 | -0.1988  | 0.006463 | 0 |
| chr3 | 1.75E+08 | 1.75E+08 | 614  | 837  | 1.75E+08 | -0.25103 | 0.000881 | 0 |
| chr3 | 1.75E+08 | 1.76E+08 | 671  | 910  | 1.75E+08 | -0.24359 | 0.001196 | 0 |
| chr3 | 1.76E+08 | 1.76E+08 | 635  | 875  | 1.76E+08 | -0.26656 | 0.000454 | 0 |
| chr3 | 1.76E+08 | 1.76E+08 | 577  | 752  | 1.76E+08 | -0.1862  | 0.009903 | 0 |
| chr3 | 1.76E+08 | 1.76E+08 | 620  | 818  | 1.76E+08 | -0.20387 | 0.005411 | 0 |
| chr3 | 1.76E+08 | 1.76E+08 | 607  | 793  | 1.76E+08 | -0.18966 | 0.008826 | 0 |
| chr3 | 1.77E+08 | 1.77E+08 | 575  | 805  | 1.77E+08 | -0.28946 | 0.000161 | 0 |
| chr3 | 1.77E+08 | 1.77E+08 | 635  | 842  | 1.77E+08 | -0.2111  | 0.004176 | 0 |
| chr3 | 1.8E+08  | 1.8E+08  | 723  | 955  | 1.8E+08  | -0.20554 | 0.0051   | 0 |
| chr3 | 1.8E+08  | 1.8E+08  | 716  | 975  | 1.8E+08  | -0.24948 | 0.000939 | 0 |
| chr3 | 1.8E+08  | 1.8E+08  | 601  | 788  | 1.8E+08  | -0.19487 | 0.0074   | 0 |
| chr3 | 1.8E+08  | 1.8E+08  | 570  | 750  | 1.8E+08  | -0.19997 | 0.006206 | 0 |
| chr3 | 1.8E+08  | 1.8E+08  | 569  | 748  | 1.8E+08  | -0.19865 | 0.006498 | 0 |
| chr3 | 1.84E+08 | 1.84E+08 | 1037 | 1005 | 1.84E+08 | 0.241183 | 0.001178 | 0 |

|      |          |          |      |      |          |          |          |   |
|------|----------|----------|------|------|----------|----------|----------|---|
| chr3 | 1.84E+08 | 1.84E+08 | 1041 | 988  | 1.84E+08 | 0.27135  | 0.000314 | 0 |
| chr3 | 1.84E+08 | 1.84E+08 | 1100 | 1068 | 1.84E+08 | 0.238555 | 0.001314 | 0 |
| chr3 | 1.84E+08 | 1.84E+08 | 1140 | 1149 | 1.84E+08 | 0.184618 | 0.00989  | 0 |
| chr3 | 1.84E+08 | 1.84E+08 | 1111 | 1107 | 1.84E+08 | 0.201167 | 0.005562 | 0 |
| chr3 | 1.86E+08 | 1.86E+08 | 813  | 812  | 1.86E+08 | 0.197739 | 0.006287 | 0 |
| chr3 | 1.86E+08 | 1.86E+08 | 914  | 920  | 1.86E+08 | 0.186523 | 0.009274 | 0 |
| chr3 | 1.89E+08 | 1.89E+08 | 763  | 1022 | 1.89E+08 | -0.22568 | 0.002424 | 0 |
| chr3 | 1.93E+08 | 1.93E+08 | 575  | 750  | 1.93E+08 | -0.18737 | 0.009527 | 0 |
| chr3 | 1.95E+08 | 1.95E+08 | 502  | 655  | 1.95E+08 | -0.18784 | 0.009377 | 0 |
| chr3 | 1.95E+08 | 1.96E+08 | 681  | 686  | 1.95E+08 | 0.185409 | 0.00963  | 0 |
| chr3 | 1.95E+08 | 1.96E+08 | 806  | 812  | 1.96E+08 | 0.185263 | 0.009678 | 0 |
| chr3 | 1.96E+08 | 1.96E+08 | 1037 | 1030 | 1.96E+08 | 0.205735 | 0.004713 | 0 |
| chr3 | 1.96E+08 | 1.96E+08 | 889  | 880  | 1.96E+08 | 0.210643 | 0.003931 | 0 |
| chr3 | 1.96E+08 | 1.96E+08 | 891  | 893  | 1.96E+08 | 0.192728 | 0.007496 | 0 |
| chr3 | 1.97E+08 | 1.97E+08 | 968  | 954  | 1.97E+08 | 0.216981 | 0.003095 | 0 |
| chr3 | 1.97E+08 | 1.97E+08 | 1126 | 1105 | 1.97E+08 | 0.223123 | 0.002441 | 0 |
| chr3 | 1.97E+08 | 1.97E+08 | 1034 | 1013 | 1.97E+08 | 0.225565 | 0.002218 | 0 |
| chr3 | 1.97E+08 | 1.97E+08 | 1082 | 1032 | 1.97E+08 | 0.264221 | 0.000435 | 0 |
| chr3 | 1.97E+08 | 1.98E+08 | 898  | 899  | 1.98E+08 | 0.194357 | 0.007082 | 0 |
| chr3 | 1.98E+08 | 1.98E+08 | 13   | 12   | 1.98E+08 | 0.31144  | 4.46E-05 | 0 |
| chr3 | 1        | 100000   | 85   | 109  | 50000    | -0.16283 | 0.020658 | 0 |
| chr3 | 50001    | 150000   | 341  | 428  | 1.00E+05 | -0.13188 | 0.048946 | 0 |
| chr3 | 100001   | 200000   | 472  | 594  | 150000   | -0.13571 | 0.044285 | 0 |
| chr3 | 150001   | 250000   | 444  | 571  | 2.00E+05 | -0.16697 | 0.018232 | 0 |
| chr3 | 200001   | 300000   | 458  | 586  | 250000   | -0.15959 | 0.022745 | 0 |
| chr3 | 400001   | 500000   | 455  | 571  | 450000   | -0.13166 | 0.049218 | 0 |
| chr3 | 800001   | 900000   | 366  | 462  | 850000   | -0.14009 | 0.039418 | 0 |
| chr3 | 850001   | 950000   | 357  | 458  | 9.00E+05 | -0.16346 | 0.020272 | 0 |
| chr3 | 1000001  | 1100000  | 427  | 544  | 1050000  | -0.15341 | 0.027224 | 0 |
| chr3 | 1050001  | 1150000  | 388  | 504  | 1100000  | -0.1814  | 0.011584 | 0 |
| chr3 | 1100001  | 1200000  | 397  | 516  | 1150000  | -0.18227 | 0.011263 | 0 |
| chr3 | 1250001  | 1350000  | 407  | 515  | 1300000  | -0.14358 | 0.035852 | 0 |
| chr3 | 1300001  | 1400000  | 451  | 574  | 1350000  | -0.15196 | 0.028373 | 0 |
| chr3 | 1750001  | 1850000  | 428  | 543  | 1800000  | -0.14738 | 0.032282 | 0 |
| chr3 | 1800001  | 1900000  | 431  | 543  | 1850000  | -0.1373  | 0.042464 | 0 |
| chr3 | 2250001  | 2350000  | 414  | 521  | 2300000  | -0.13569 | 0.044312 | 0 |
| chr3 | 2750001  | 2850000  | 458  | 575  | 2800000  | -0.13225 | 0.048473 | 0 |
| chr3 | 3000001  | 3100000  | 471  | 594  | 3050000  | -0.13877 | 0.040831 | 0 |
| chr3 | 3850001  | 3950000  | 418  | 543  | 3900000  | -0.18149 | 0.011553 | 0 |
| chr3 | 4650001  | 4750000  | 723  | 746  | 4700000  | 0.150783 | 0.028454 | 0 |
| chr3 | 4750001  | 4850000  | 765  | 791  | 4800000  | 0.147745 | 0.031042 | 0 |
| chr3 | 4800001  | 4900000  | 758  | 789  | 4850000  | 0.138136 | 0.040542 | 0 |
| chr3 | 4850001  | 4950000  | 695  | 723  | 4900000  | 0.13898  | 0.039621 | 0 |
| chr3 | 5050001  | 5150000  | 679  | 699  | 5100000  | 0.154082 | 0.025849 | 0 |
| chr3 | 5100001  | 5200000  | 599  | 626  | 5150000  | 0.132356 | 0.047313 | 0 |
| chr3 | 5150001  | 5250000  | 596  | 623  | 5200000  | 0.132043 | 0.047704 | 0 |
| chr3 | 5350001  | 5450000  | 508  | 651  | 5400000  | -0.16187 | 0.021261 | 0 |

|      |          |          |     |     |          |          |          |   |
|------|----------|----------|-----|-----|----------|----------|----------|---|
| chr3 | 5400001  | 5500000  | 463 | 583 | 5450000  | -0.13652 | 0.043351 | 0 |
| chr3 | 5600001  | 5700000  | 474 | 613 | 5650000  | -0.17504 | 0.014198 | 0 |
| chr3 | 5650001  | 5750000  | 477 | 603 | 5700000  | -0.14221 | 0.037222 | 0 |
| chr3 | 6200001  | 6300000  | 436 | 568 | 6250000  | -0.1856  | 0.0101   | 0 |
| chr3 | 6400001  | 6500000  | 409 | 522 | 6450000  | -0.15599 | 0.025273 | 0 |
| chr3 | 6500001  | 6600000  | 382 | 485 | 6550000  | -0.14845 | 0.031331 | 0 |
| chr3 | 6650001  | 6750000  | 455 | 580 | 6700000  | -0.15422 | 0.026593 | 0 |
| chr3 | 6700001  | 6800000  | 458 | 578 | 6750000  | -0.13976 | 0.039767 | 0 |
| chr3 | 7150001  | 7250000  | 438 | 550 | 7200000  | -0.13254 | 0.048115 | 0 |
| chr3 | 7350001  | 7450000  | 417 | 543 | 7400000  | -0.18494 | 0.010321 | 0 |
| chr3 | 7650001  | 7750000  | 453 | 571 | 7700000  | -0.13802 | 0.041664 | 0 |
| chr3 | 7700001  | 7800000  | 478 | 612 | 7750000  | -0.16056 | 0.022103 | 0 |
| chr3 | 7850001  | 7950000  | 427 | 555 | 7900000  | -0.18229 | 0.011256 | 0 |
| chr3 | 8050001  | 8150000  | 415 | 536 | 8100000  | -0.17316 | 0.01506  | 0 |
| chr3 | 8100001  | 8200000  | 442 | 559 | 8150000  | -0.14284 | 0.036586 | 0 |
| chr3 | 8900001  | 9000000  | 532 | 682 | 8950000  | -0.16238 | 0.020936 | 0 |
| chr3 | 9250001  | 9350000  | 596 | 618 | 9300000  | 0.143669 | 0.034819 | 0 |
| chr3 | 9300001  | 9400000  | 571 | 589 | 9350000  | 0.151186 | 0.028124 | 0 |
| chr3 | 9350001  | 9450000  | 609 | 617 | 9400000  | 0.177135 | 0.012668 | 0 |
| chr3 | 9400001  | 9500000  | 615 | 627 | 9450000  | 0.168084 | 0.016911 | 0 |
| chr3 | 9450001  | 9550000  | 631 | 645 | 9500000  | 0.164304 | 0.019015 | 0 |
| chr3 | 9950001  | 10050000 | 870 | 882 | 1.00E+07 | 0.1762   | 0.013059 | 0 |
| chr3 | 10550001 | 10650000 | 741 | 758 | 10600000 | 0.163239 | 0.019647 | 0 |
| chr3 | 10700001 | 10800000 | 676 | 692 | 10750000 | 0.162214 | 0.020271 | 0 |
| chr3 | 11100001 | 11200000 | 687 | 698 | 11150000 | 0.173046 | 0.014455 | 0 |
| chr3 | 11150001 | 11250000 | 736 | 752 | 11200000 | 0.164936 | 0.018648 | 0 |
| chr3 | 11800001 | 11900000 | 646 | 661 | 11850000 | 0.162847 | 0.019883 | 0 |
| chr3 | 11850001 | 11950000 | 490 | 501 | 11900000 | 0.163934 | 0.019232 | 0 |
| chr3 | 12150001 | 12250000 | 732 | 751 | 12200000 | 0.158994 | 0.022344 | 0 |
| chr3 | 12500001 | 12600000 | 684 | 712 | 12550000 | 0.138082 | 0.040601 | 0 |
| chr3 | 12800001 | 12900000 | 632 | 640 | 12850000 | 0.177816 | 0.01239  | 0 |
| chr3 | 13000001 | 13100000 | 807 | 834 | 13050000 | 0.148484 | 0.030395 | 0 |
| chr3 | 13200001 | 13300000 | 716 | 741 | 13250000 | 0.146449 | 0.032204 | 0 |
| chr3 | 13250001 | 13350000 | 719 | 744 | 13300000 | 0.146652 | 0.03202  | 0 |
| chr3 | 13350001 | 13450000 | 737 | 746 | 13400000 | 0.178452 | 0.012135 | 0 |
| chr3 | 13500001 | 13600000 | 761 | 770 | 13550000 | 0.179001 | 0.011919 | 0 |
| chr3 | 14050001 | 14150000 | 463 | 597 | 14100000 | -0.17076 | 0.01623  | 0 |
| chr3 | 14200001 | 14300000 | 728 | 751 | 14250000 | 0.151089 | 0.028204 | 0 |
| chr3 | 14550001 | 14650000 | 781 | 802 | 14600000 | 0.157683 | 0.023237 | 0 |
| chr3 | 14700001 | 14800000 | 554 | 709 | 14750000 | -0.15994 | 0.022513 | 0 |
| chr3 | 15100001 | 15200000 | 531 | 553 | 15150000 | 0.137395 | 0.041362 | 0 |
| chr3 | 15200001 | 15300000 | 543 | 690 | 15250000 | -0.14968 | 0.030265 | 0 |
| chr3 | 15300001 | 15400000 | 714 | 742 | 15350000 | 0.140468 | 0.038042 | 0 |
| chr3 | 15900001 | 16000000 | 535 | 680 | 15950000 | -0.15003 | 0.029966 | 0 |
| chr3 | 15950001 | 16050000 | 495 | 630 | 1.60E+07 | -0.15196 | 0.028373 | 0 |
| chr3 | 16500001 | 16600000 | 522 | 679 | 16550000 | -0.1834  | 0.010856 | 0 |
| chr3 | 17300001 | 17400000 | 455 | 591 | 17350000 | -0.18133 | 0.011612 | 0 |



|      |          |          |     |     |          |          |          |   |
|------|----------|----------|-----|-----|----------|----------|----------|---|
| chr3 | 17350001 | 17450000 | 450 | 578 | 17400000 | -0.16518 | 0.019248 | 0 |
| chr3 | 17400001 | 17500000 | 457 | 578 | 17450000 | -0.14291 | 0.036513 | 0 |
| chr3 | 17500001 | 17600000 | 448 | 582 | 17550000 | -0.18156 | 0.011526 | 0 |
| chr3 | 17850001 | 17950000 | 528 | 546 | 17900000 | 0.1476   | 0.03117  | 0 |
| chr3 | 18050001 | 18150000 | 488 | 615 | 18100000 | -0.13774 | 0.041969 | 0 |
| chr3 | 18200001 | 18300000 | 476 | 607 | 18250000 | -0.15477 | 0.026176 | 0 |
| chr3 | 18500001 | 18600000 | 443 | 561 | 18550000 | -0.14473 | 0.034738 | 0 |
| chr3 | 18850001 | 18950000 | 434 | 560 | 18900000 | -0.17177 | 0.015728 | 0 |
| chr3 | 19400001 | 19500000 | 427 | 545 | 19450000 | -0.15606 | 0.025221 | 0 |
| chr3 | 20150001 | 20250000 | 473 | 597 | 20200000 | -0.13993 | 0.039587 | 0 |
| chr3 | 20550001 | 20650000 | 417 | 530 | 20600000 | -0.14998 | 0.030009 | 0 |
| chr3 | 20650001 | 20750000 | 376 | 487 | 20700000 | -0.17723 | 0.013246 | 0 |
| chr3 | 20850001 | 20950000 | 382 | 496 | 20900000 | -0.1808  | 0.01181  | 0 |
| chr3 | 20900001 | 21000000 | 403 | 524 | 20950000 | -0.18282 | 0.011062 | 0 |
| chr3 | 21100001 | 21200000 | 434 | 444 | 21150000 | 0.163098 | 0.019731 | 0 |
| chr3 | 21900001 | 22000000 | 439 | 559 | 21950000 | -0.15266 | 0.027809 | 0 |
| chr3 | 22000001 | 22100000 | 370 | 472 | 22050000 | -0.1553  | 0.025781 | 0 |
| chr3 | 22100001 | 22200000 | 402 | 521 | 22150000 | -0.17812 | 0.012872 | 0 |
| chr3 | 22150001 | 22250000 | 394 | 495 | 22200000 | -0.13327 | 0.047209 | 0 |
| chr3 | 22300001 | 22400000 | 430 | 554 | 22350000 | -0.16959 | 0.016827 | 0 |
| chr3 | 22600001 | 22700000 | 391 | 500 | 22650000 | -0.1588  | 0.023282 | 0 |
| chr3 | 22650001 | 22750000 | 403 | 513 | 22700000 | -0.15222 | 0.028167 | 0 |
| chr3 | 23000001 | 23100000 | 457 | 579 | 23050000 | -0.14541 | 0.034097 | 0 |
| chr3 | 23450001 | 23550000 | 614 | 638 | 23500000 | 0.140645 | 0.037858 | 0 |
| chr3 | 23550001 | 23650000 | 547 | 572 | 23600000 | 0.131489 | 0.048404 | 0 |
| chr3 | 23950001 | 24050000 | 577 | 588 | 2.40E+07 | 0.168718 | 0.016579 | 0 |
| chr3 | 24100001 | 24200000 | 518 | 664 | 24150000 | -0.16227 | 0.021008 | 0 |
| chr3 | 25300001 | 25400000 | 522 | 656 | 25350000 | -0.13368 | 0.046704 | 0 |
| chr3 | 26450001 | 26550000 | 432 | 553 | 26500000 | -0.16029 | 0.022283 | 0 |
| chr3 | 26600001 | 26700000 | 495 | 625 | 26650000 | -0.14046 | 0.039018 | 0 |
| chr3 | 26750001 | 26850000 | 388 | 505 | 26800000 | -0.18426 | 0.010553 | 0 |
| chr3 | 26850001 | 26950000 | 427 | 537 | 26900000 | -0.13472 | 0.045452 | 0 |
| chr3 | 27200001 | 27300000 | 476 | 616 | 27250000 | -0.17601 | 0.013769 | 0 |
| chr3 | 27600001 | 27700000 | 462 | 581 | 27650000 | -0.13468 | 0.0455   | 0 |
| chr3 | 27750001 | 27850000 | 529 | 686 | 27800000 | -0.17898 | 0.012525 | 0 |
| chr3 | 28050001 | 28150000 | 526 | 532 | 28100000 | 0.1796   | 0.011686 | 0 |
| chr3 | 29600001 | 29700000 | 473 | 602 | 29650000 | -0.15196 | 0.028373 | 0 |
| chr3 | 29800001 | 29900000 | 453 | 579 | 29850000 | -0.15809 | 0.02377  | 0 |
| chr3 | 30000001 | 30100000 | 419 | 438 | 30050000 | 0.131982 | 0.047781 | 0 |
| chr3 | 31150001 | 31250000 | 507 | 640 | 31200000 | -0.14012 | 0.039379 | 0 |
| chr3 | 31200001 | 31300000 | 507 | 659 | 31250000 | -0.18233 | 0.011241 | 0 |
| chr3 | 31650001 | 31750000 | 568 | 715 | 31700000 | -0.13609 | 0.043848 | 0 |
| chr3 | 31700001 | 31800000 | 540 | 694 | 31750000 | -0.16601 | 0.018769 | 0 |
| chr3 | 32050001 | 32150000 | 437 | 567 | 32100000 | -0.17975 | 0.012218 | 0 |
| chr3 | 32200001 | 32300000 | 593 | 616 | 32250000 | 0.141065 | 0.037423 | 0 |
| chr3 | 32300001 | 32400000 | 490 | 627 | 32350000 | -0.15972 | 0.022657 | 0 |
| chr3 | 32350001 | 32450000 | 524 | 658 | 32400000 | -0.13256 | 0.04809  | 0 |

|      |          |          |     |     |          |          |          |   |
|------|----------|----------|-----|-----|----------|----------|----------|---|
| chr3 | 32700001 | 32800000 | 470 | 591 | 32750000 | -0.13453 | 0.045677 | 0 |
| chr3 | 33000001 | 33100000 | 500 | 639 | 33050000 | -0.15792 | 0.023885 | 0 |
| chr3 | 34400001 | 34500000 | 416 | 536 | 34450000 | -0.16969 | 0.016775 | 0 |
| chr3 | 34600001 | 34700000 | 395 | 508 | 34650000 | -0.16701 | 0.018207 | 0 |
| chr3 | 34650001 | 34750000 | 384 | 491 | 34700000 | -0.15865 | 0.02338  | 0 |
| chr3 | 34700001 | 34800000 | 397 | 508 | 34750000 | -0.15973 | 0.022653 | 0 |
| chr3 | 34850001 | 34950000 | 418 | 534 | 34900000 | -0.15737 | 0.024273 | 0 |
| chr3 | 35500001 | 35600000 | 378 | 476 | 35550000 | -0.13661 | 0.043246 | 0 |
| chr3 | 35700001 | 35800000 | 497 | 519 | 35750000 | 0.133474 | 0.045937 | 0 |
| chr3 | 35900001 | 36000000 | 416 | 532 | 35950000 | -0.15888 | 0.023225 | 0 |
| chr3 | 36500001 | 36600000 | 418 | 537 | 36550000 | -0.16546 | 0.019089 | 0 |
| chr3 | 38000001 | 38100000 | 678 | 694 | 38050000 | 0.162313 | 0.02021  | 0 |
| chr3 | 38450001 | 38550000 | 606 | 630 | 38500000 | 0.139929 | 0.038608 | 0 |
| chr3 | 39200001 | 39300000 | 663 | 693 | 39250000 | 0.132117 | 0.047612 | 0 |
| chr3 | 39250001 | 39350000 | 624 | 645 | 39300000 | 0.14821  | 0.030634 | 0 |
| chr3 | 39350001 | 39450000 | 521 | 541 | 39400000 | 0.141618 | 0.036857 | 0 |
| chr3 | 39400001 | 39500000 | 551 | 564 | 39450000 | 0.16232  | 0.020205 | 0 |
| chr3 | 39850001 | 39950000 | 413 | 519 | 39900000 | -0.13363 | 0.046769 | 0 |
| chr3 | 40000001 | 40100000 | 389 | 499 | 40050000 | -0.16331 | 0.020365 | 0 |
| chr3 | 41550001 | 41650000 | 439 | 553 | 41600000 | -0.1371  | 0.042696 | 0 |
| chr3 | 41750001 | 41850000 | 438 | 551 | 41800000 | -0.13516 | 0.044936 | 0 |
| chr3 | 41800001 | 41900000 | 373 | 472 | 41850000 | -0.14365 | 0.035786 | 0 |
| chr3 | 41950001 | 42050000 | 506 | 521 | 4.20E+07 | 0.153817 | 0.026051 | 0 |
| chr3 | 42000001 | 42100000 | 597 | 619 | 42050000 | 0.143755 | 0.034735 | 0 |
| chr3 | 42250001 | 42350000 | 542 | 565 | 42300000 | 0.136005 | 0.04294  | 0 |
| chr3 | 43000001 | 43100000 | 573 | 737 | 43050000 | -0.16717 | 0.018122 | 0 |
| chr3 | 43300001 | 43400000 | 603 | 613 | 43350000 | 0.172234 | 0.014834 | 0 |
| chr3 | 43650001 | 43750000 | 566 | 588 | 43700000 | 0.140949 | 0.037543 | 0 |
| chr3 | 43700001 | 43800000 | 550 | 575 | 43750000 | 0.131833 | 0.047969 | 0 |
| chr3 | 43750001 | 43850000 | 622 | 650 | 43800000 | 0.132438 | 0.047211 | 0 |
| chr3 | 44000001 | 44100000 | 649 | 675 | 44050000 | 0.139294 | 0.039284 | 0 |
| chr3 | 44150001 | 44250000 | 538 | 696 | 44200000 | -0.17552 | 0.013984 | 0 |
| chr3 | 44200001 | 44300000 | 519 | 675 | 44250000 | -0.18319 | 0.01093  | 0 |
| chr3 | 44300001 | 44400000 | 555 | 577 | 44350000 | 0.139879 | 0.038661 | 0 |
| chr3 | 45650001 | 45750000 | 621 | 638 | 45700000 | 0.157    | 0.023715 | 0 |
| chr3 | 45700001 | 45800000 | 633 | 643 | 45750000 | 0.17335  | 0.014315 | 0 |
| chr3 | 45800001 | 45900000 | 702 | 716 | 45850000 | 0.167474 | 0.017236 | 0 |
| chr3 | 46150001 | 46250000 | 574 | 589 | 46200000 | 0.158746 | 0.022511 | 0 |
| chr3 | 46750001 | 46850000 | 430 | 435 | 46800000 | 0.179284 | 0.011808 | 0 |
| chr3 | 47000001 | 47100000 | 729 | 751 | 47050000 | 0.153069 | 0.026627 | 0 |
| chr3 | 47150001 | 47250000 | 544 | 563 | 47200000 | 0.146435 | 0.032217 | 0 |
| chr3 | 47200001 | 47300000 | 568 | 578 | 47250000 | 0.170784 | 0.015533 | 0 |
| chr3 | 47250001 | 47350000 | 646 | 656 | 47300000 | 0.173801 | 0.014109 | 0 |
| chr3 | 47400001 | 47500000 | 685 | 703 | 47450000 | 0.158542 | 0.022648 | 0 |
| chr3 | 47450001 | 47550000 | 626 | 640 | 47500000 | 0.164054 | 0.019162 | 0 |
| chr3 | 47500001 | 47600000 | 595 | 617 | 47550000 | 0.143582 | 0.034903 | 0 |
| chr3 | 47550001 | 47650000 | 685 | 692 | 47600000 | 0.181295 | 0.01105  | 0 |

|      |          |          |     |     |          |          |          |   |
|------|----------|----------|-----|-----|----------|----------|----------|---|
| chr3 | 47600001 | 47700000 | 681 | 710 | 47650000 | 0.135799 | 0.043178 | 0 |
| chr3 | 48400001 | 48500000 | 732 | 761 | 48450000 | 0.13991  | 0.038628 | 0 |
| chr3 | 48450001 | 48550000 | 719 | 745 | 48500000 | 0.144714 | 0.033816 | 0 |
| chr3 | 48850001 | 48950000 | 520 | 543 | 48900000 | 0.133522 | 0.045878 | 0 |
| chr3 | 48900001 | 49000000 | 545 | 561 | 48950000 | 0.154218 | 0.025746 | 0 |
| chr3 | 49000001 | 49100000 | 669 | 681 | 49050000 | 0.170314 | 0.015766 | 0 |
| chr3 | 49250001 | 49350000 | 502 | 508 | 49300000 | 0.178822 | 0.011989 | 0 |
| chr3 | 49300001 | 49400000 | 571 | 581 | 49350000 | 0.170916 | 0.015469 | 0 |
| chr3 | 49350001 | 49450000 | 569 | 577 | 49400000 | 0.17582  | 0.01322  | 0 |
| chr3 | 49500001 | 49600000 | 628 | 656 | 49550000 | 0.133032 | 0.046478 | 0 |
| chr3 | 49900001 | 50000000 | 677 | 706 | 49950000 | 0.135451 | 0.043583 | 0 |
| chr3 | 50100001 | 50200000 | 670 | 701 | 50150000 | 0.13071  | 0.0494   | 0 |
| chr3 | 50500001 | 50600000 | 852 | 864 | 50550000 | 0.175785 | 0.013236 | 0 |
| chr3 | 50550001 | 50650000 | 861 | 873 | 50600000 | 0.175995 | 0.013146 | 0 |
| chr3 | 51150001 | 51250000 | 400 | 518 | 51200000 | -0.17699 | 0.013347 | 0 |
| chr3 | 51200001 | 51300000 | 453 | 579 | 51250000 | -0.15809 | 0.02377  | 0 |
| chr3 | 51250001 | 51350000 | 468 | 590 | 51300000 | -0.13824 | 0.041413 | 0 |
| chr3 | 51450001 | 51550000 | 514 | 531 | 51500000 | 0.14902  | 0.029933 | 0 |
| chr3 | 51500001 | 51600000 | 541 | 547 | 51550000 | 0.180051 | 0.011514 | 0 |
| chr3 | 51550001 | 51650000 | 514 | 521 | 51600000 | 0.176448 | 0.012954 | 0 |
| chr3 | 51650001 | 51750000 | 714 | 727 | 51700000 | 0.169932 | 0.015958 | 0 |
| chr3 | 51800001 | 51900000 | 537 | 695 | 51850000 | -0.17613 | 0.013716 | 0 |
| chr3 | 51900001 | 52000000 | 666 | 675 | 51950000 | 0.176598 | 0.012891 | 0 |
| chr3 | 52100001 | 52200000 | 803 | 831 | 52150000 | 0.146515 | 0.032145 | 0 |
| chr3 | 52300001 | 52400000 | 805 | 817 | 52350000 | 0.174616 | 0.013745 | 0 |
| chr3 | 52500001 | 52600000 | 776 | 789 | 52550000 | 0.171994 | 0.014948 | 0 |
| chr3 | 52650001 | 52750000 | 667 | 681 | 52700000 | 0.165995 | 0.018048 | 0 |
| chr3 | 53450001 | 53550000 | 599 | 614 | 53500000 | 0.16028  | 0.021495 | 0 |
| chr3 | 53800001 | 53900000 | 744 | 763 | 53850000 | 0.159583 | 0.021952 | 0 |
| chr3 | 53850001 | 53950000 | 688 | 701 | 53900000 | 0.168957 | 0.016455 | 0 |
| chr3 | 54000001 | 54100000 | 535 | 686 | 54050000 | -0.16271 | 0.020735 | 0 |
| chr3 | 54100001 | 54200000 | 679 | 704 | 54150000 | 0.143799 | 0.034692 | 0 |
| chr3 | 54300001 | 54400000 | 583 | 606 | 54350000 | 0.140141 | 0.038385 | 0 |
| chr3 | 54350001 | 54450000 | 590 | 611 | 54400000 | 0.145506 | 0.033072 | 0 |
| chr3 | 54550001 | 54650000 | 566 | 715 | 54600000 | -0.14118 | 0.038274 | 0 |
| chr3 | 54600001 | 54700000 | 540 | 685 | 54650000 | -0.14718 | 0.032459 | 0 |
| chr3 | 54900001 | 55000000 | 545 | 691 | 54950000 | -0.14647 | 0.033111 | 0 |
| chr3 | 56850001 | 56950000 | 563 | 709 | 56900000 | -0.13669 | 0.04316  | 0 |
| chr3 | 57400001 | 57500000 | 457 | 579 | 57450000 | -0.14541 | 0.034097 | 0 |
| chr3 | 57600001 | 57700000 | 568 | 594 | 57650000 | 0.131391 | 0.048528 | 0 |
| chr3 | 57900001 | 58000000 | 673 | 681 | 57950000 | 0.178915 | 0.011952 | 0 |
| chr3 | 58200001 | 58300000 | 642 | 667 | 58250000 | 0.14085  | 0.037646 | 0 |
| chr3 | 58550001 | 58650000 | 631 | 798 | 58600000 | -0.14279 | 0.036639 | 0 |
| chr3 | 58950001 | 59050000 | 406 | 512 | 5.90E+07 | -0.1387  | 0.04091  | 0 |
| chr3 | 59150001 | 59250000 | 397 | 517 | 59200000 | -0.18506 | 0.01028  | 0 |
| chr3 | 59700001 | 59800000 | 467 | 587 | 59750000 | -0.13397 | 0.04635  | 0 |
| chr3 | 59750001 | 59850000 | 480 | 611 | 59800000 | -0.15217 | 0.0282   | 0 |

|      |          |          |     |     |          |          |          |   |
|------|----------|----------|-----|-----|----------|----------|----------|---|
| chr3 | 60250001 | 60350000 | 428 | 540 | 60300000 | -0.13939 | 0.040167 | 0 |
| chr3 | 60350001 | 60450000 | 411 | 516 | 60400000 | -0.13227 | 0.048451 | 0 |
| chr3 | 60550001 | 60650000 | 199 | 252 | 60600000 | -0.14469 | 0.034775 | 0 |
| chr3 | 60650001 | 60750000 | 327 | 418 | 60700000 | -0.15825 | 0.023659 | 0 |
| chr3 | 60700001 | 60800000 | 286 | 361 | 60750000 | -0.14002 | 0.039488 | 0 |
| chr3 | 60850001 | 60950000 | 177 | 229 | 60900000 | -0.17564 | 0.013932 | 0 |
| chr3 | 61200001 | 61300000 | 419 | 530 | 61250000 | -0.14308 | 0.036347 | 0 |
| chr3 | 61450001 | 61550000 | 420 | 530 | 61500000 | -0.13964 | 0.039894 | 0 |
| chr3 | 61550001 | 61650000 | 442 | 564 | 61600000 | -0.15569 | 0.025494 | 0 |
| chr3 | 61850001 | 61950000 | 458 | 590 | 61900000 | -0.1694  | 0.016921 | 0 |
| chr3 | 62000001 | 62100000 | 420 | 527 | 62050000 | -0.13145 | 0.049486 | 0 |
| chr3 | 62500001 | 62600000 | 498 | 632 | 62550000 | -0.14782 | 0.03189  | 0 |
| chr3 | 62550001 | 62650000 | 513 | 659 | 62600000 | -0.16536 | 0.019146 | 0 |
| chr3 | 62800001 | 62900000 | 461 | 585 | 62850000 | -0.14771 | 0.031988 | 0 |
| chr3 | 63350001 | 63450000 | 469 | 593 | 63400000 | -0.14248 | 0.036944 | 0 |
| chr3 | 63500001 | 63600000 | 440 | 571 | 63550000 | -0.18002 | 0.012111 | 0 |
| chr3 | 63700001 | 63800000 | 386 | 487 | 63750000 | -0.13936 | 0.040197 | 0 |
| chr3 | 63800001 | 63900000 | 564 | 574 | 63850000 | 0.170607 | 0.015621 | 0 |
| chr3 | 64050001 | 64150000 | 429 | 558 | 64100000 | -0.18332 | 0.010882 | 0 |
| chr3 | 64550001 | 64650000 | 454 | 589 | 64600000 | -0.17961 | 0.012273 | 0 |
| chr3 | 64700001 | 64800000 | 451 | 581 | 64750000 | -0.16945 | 0.016899 | 0 |
| chr3 | 64750001 | 64850000 | 438 | 562 | 64800000 | -0.16368 | 0.020141 | 0 |
| chr3 | 65000001 | 65100000 | 436 | 556 | 65050000 | -0.15479 | 0.02616  | 0 |
| chr3 | 65300001 | 65400000 | 476 | 604 | 65350000 | -0.14762 | 0.032062 | 0 |
| chr3 | 66600001 | 66700000 | 476 | 609 | 66650000 | -0.15952 | 0.022793 | 0 |
| chr3 | 66650001 | 66750000 | 493 | 625 | 66700000 | -0.14631 | 0.033259 | 0 |
| chr3 | 66900001 | 67000000 | 436 | 568 | 66950000 | -0.1856  | 0.0101   | 0 |
| chr3 | 66950001 | 67050000 | 491 | 621 | 6.70E+07 | -0.14291 | 0.036518 | 0 |
| chr3 | 67200001 | 67300000 | 444 | 573 | 67250000 | -0.17201 | 0.015609 | 0 |
| chr3 | 67300001 | 67400000 | 443 | 559 | 67350000 | -0.13958 | 0.03996  | 0 |
| chr3 | 67850001 | 67950000 | 464 | 596 | 67900000 | -0.16522 | 0.019223 | 0 |
| chr3 | 68000001 | 68100000 | 457 | 574 | 68050000 | -0.13289 | 0.047673 | 0 |
| chr3 | 68550001 | 68650000 | 424 | 537 | 68600000 | -0.14489 | 0.034581 | 0 |
| chr3 | 68600001 | 68700000 | 384 | 495 | 68650000 | -0.17036 | 0.01643  | 0 |
| chr3 | 68950001 | 69050000 | 511 | 660 | 6.90E+07 | -0.17318 | 0.01505  | 0 |
| chr3 | 69100001 | 69200000 | 609 | 632 | 69150000 | 0.142481 | 0.035988 | 0 |
| chr3 | 69400001 | 69500000 | 511 | 662 | 69450000 | -0.17754 | 0.013112 | 0 |
| chr3 | 69450001 | 69550000 | 509 | 642 | 69500000 | -0.13894 | 0.040644 | 0 |
| chr3 | 70050001 | 70150000 | 492 | 628 | 70100000 | -0.15614 | 0.025158 | 0 |
| chr3 | 70100001 | 70200000 | 515 | 663 | 70150000 | -0.16847 | 0.017412 | 0 |
| chr3 | 70450001 | 70550000 | 420 | 527 | 70500000 | -0.13145 | 0.049486 | 0 |
| chr3 | 70550001 | 70650000 | 514 | 668 | 70600000 | -0.18212 | 0.011319 | 0 |
| chr3 | 70900001 | 71000000 | 501 | 642 | 70950000 | -0.1618  | 0.021303 | 0 |
| chr3 | 72400001 | 72500000 | 620 | 635 | 72450000 | 0.161475 | 0.020732 | 0 |
| chr3 | 72650001 | 72750000 | 625 | 645 | 72700000 | 0.15052  | 0.02867  | 0 |
| chr3 | 72750001 | 72850000 | 503 | 517 | 72800000 | 0.156357 | 0.024172 | 0 |
| chr3 | 73700001 | 73800000 | 441 | 559 | 73750000 | -0.14611 | 0.033443 | 0 |

|      |          |          |     |      |          |          |          |   |
|------|----------|----------|-----|------|----------|----------|----------|---|
| chr3 | 73800001 | 73900000 | 395 | 513  | 73850000 | -0.18114 | 0.011682 | 0 |
| chr3 | 74050001 | 74150000 | 458 | 587  | 74100000 | -0.16205 | 0.021145 | 0 |
| chr3 | 74100001 | 74200000 | 418 | 540  | 74150000 | -0.17349 | 0.014903 | 0 |
| chr3 | 74200001 | 74300000 | 379 | 484  | 74250000 | -0.15685 | 0.024649 | 0 |
| chr3 | 74800001 | 74900000 | 381 | 478  | 74850000 | -0.13126 | 0.049734 | 0 |
| chr3 | 74850001 | 74950000 | 373 | 468  | 74900000 | -0.13137 | 0.049589 | 0 |
| chr3 | 75000001 | 75100000 | 355 | 452  | 75050000 | -0.15254 | 0.027907 | 0 |
| chr3 | 75050001 | 75150000 | 357 | 449  | 75100000 | -0.13483 | 0.045326 | 0 |
| chr3 | 75350001 | 75450000 | 199 | 256  | 75400000 | -0.16741 | 0.017987 | 0 |
| chr3 | 75650001 | 75750000 | 666 | 856  | 75700000 | -0.16613 | 0.018705 | 0 |
| chr3 | 75700001 | 75800000 | 932 | 1171 | 75750000 | -0.13338 | 0.047079 | 0 |
| chr3 | 75900001 | 76000000 | 266 | 337  | 75950000 | -0.14536 | 0.034141 | 0 |
| chr3 | 76100001 | 76200000 | 414 | 523  | 76150000 | -0.14122 | 0.038233 | 0 |
| chr3 | 76350001 | 76450000 | 422 | 548  | 76400000 | -0.18097 | 0.011747 | 0 |
| chr3 | 76700001 | 76800000 | 412 | 531  | 76750000 | -0.1701  | 0.01656  | 0 |
| chr3 | 76750001 | 76850000 | 409 | 517  | 76800000 | -0.1421  | 0.037329 | 0 |
| chr3 | 76800001 | 76900000 | 436 | 553  | 76850000 | -0.14699 | 0.032634 | 0 |
| chr3 | 76850001 | 76950000 | 455 | 580  | 76900000 | -0.15422 | 0.026593 | 0 |
| chr3 | 76900001 | 77000000 | 464 | 589  | 76950000 | -0.14818 | 0.031568 | 0 |
| chr3 | 77150001 | 77250000 | 426 | 538  | 77200000 | -0.14079 | 0.038678 | 0 |
| chr3 | 77450001 | 77550000 | 471 | 601  | 77500000 | -0.15567 | 0.025502 | 0 |
| chr3 | 77550001 | 77650000 | 457 | 586  | 77600000 | -0.16274 | 0.020712 | 0 |
| chr3 | 78100001 | 78200000 | 466 | 600  | 78150000 | -0.16867 | 0.017308 | 0 |
| chr3 | 78350001 | 78450000 | 440 | 559  | 78400000 | -0.14938 | 0.030521 | 0 |
| chr3 | 78400001 | 78500000 | 470 | 612  | 78450000 | -0.18491 | 0.010333 | 0 |
| chr3 | 78750001 | 78850000 | 539 | 545  | 78800000 | 0.179992 | 0.011536 | 0 |
| chr3 | 79050001 | 79150000 | 529 | 552  | 79100000 | 0.134562 | 0.044628 | 0 |
| chr3 | 79150001 | 79250000 | 447 | 562  | 79200000 | -0.13433 | 0.045919 | 0 |
| chr3 | 79250001 | 79350000 | 451 | 572  | 79300000 | -0.14692 | 0.032692 | 0 |
| chr3 | 79650001 | 79750000 | 407 | 513  | 79700000 | -0.13797 | 0.041719 | 0 |
| chr3 | 79750001 | 79850000 | 390 | 494  | 79800000 | -0.14507 | 0.034411 | 0 |
| chr3 | 79900001 | 80000000 | 471 | 611  | 79950000 | -0.17948 | 0.012324 | 0 |
| chr3 | 80550001 | 80650000 | 430 | 542  | 80600000 | -0.13799 | 0.04169  | 0 |
| chr3 | 80600001 | 80700000 | 402 | 516  | 80650000 | -0.16421 | 0.019819 | 0 |
| chr3 | 80650001 | 80750000 | 396 | 510  | 80700000 | -0.16903 | 0.017115 | 0 |
| chr3 | 80700001 | 80800000 | 392 | 496  | 80750000 | -0.14352 | 0.035908 | 0 |
| chr3 | 81000001 | 81100000 | 411 | 520  | 81050000 | -0.14341 | 0.036019 | 0 |
| chr3 | 81850001 | 81950000 | 481 | 604  | 81900000 | -0.13255 | 0.048102 | 0 |
| chr3 | 81900001 | 82000000 | 479 | 623  | 81950000 | -0.18324 | 0.010911 | 0 |
| chr3 | 82600001 | 82700000 | 388 | 498  | 82650000 | -0.16413 | 0.01987  | 0 |
| chr3 | 83050001 | 83150000 | 400 | 517  | 83100000 | -0.1742  | 0.014576 | 0 |
| chr3 | 83150001 | 83250000 | 353 | 448  | 83200000 | -0.14787 | 0.031844 | 0 |
| chr3 | 83400001 | 83500000 | 399 | 511  | 83450000 | -0.16097 | 0.021834 | 0 |
| chr3 | 83700001 | 83800000 | 373 | 468  | 83750000 | -0.13137 | 0.049589 | 0 |
| chr3 | 84350001 | 84450000 | 354 | 449  | 84400000 | -0.147   | 0.032621 | 0 |
| chr3 | 84750001 | 84850000 | 380 | 491  | 84800000 | -0.17376 | 0.014779 | 0 |
| chr3 | 85000001 | 85100000 | 391 | 493  | 85050000 | -0.13846 | 0.041179 | 0 |

|      |          |          |     |     |          |          |          |   |
|------|----------|----------|-----|-----|----------|----------|----------|---|
| chr3 | 85100001 | 85200000 | 357 | 465 | 85150000 | -0.18534 | 0.010186 | 0 |
| chr3 | 85350001 | 85450000 | 375 | 488 | 85400000 | -0.18403 | 0.010635 | 0 |
| chr3 | 86100001 | 86200000 | 362 | 465 | 86150000 | -0.16528 | 0.019192 | 0 |
| chr3 | 86200001 | 86300000 | 414 | 532 | 86250000 | -0.16583 | 0.018872 | 0 |
| chr3 | 86250001 | 86350000 | 394 | 509 | 86300000 | -0.17351 | 0.014897 | 0 |
| chr3 | 86750001 | 86850000 | 405 | 517 | 86800000 | -0.15628 | 0.025059 | 0 |
| chr3 | 87050001 | 87150000 | 416 | 537 | 87100000 | -0.17238 | 0.015433 | 0 |
| chr3 | 87400001 | 87500000 | 438 | 570 | 87450000 | -0.18407 | 0.010621 | 0 |
| chr3 | 87750001 | 87850000 | 413 | 530 | 87800000 | -0.16389 | 0.020013 | 0 |
| chr3 | 88200001 | 88300000 | 437 | 549 | 88250000 | -0.13321 | 0.047283 | 0 |
| chr3 | 88600001 | 88700000 | 381 | 490 | 88650000 | -0.16703 | 0.018199 | 0 |
| chr3 | 88650001 | 88750000 | 401 | 519 | 88700000 | -0.17617 | 0.013698 | 0 |
| chr3 | 89150001 | 89250000 | 401 | 506 | 89200000 | -0.13957 | 0.039967 | 0 |
| chr3 | 89600001 | 89700000 | 386 | 500 | 89650000 | -0.17736 | 0.013188 | 0 |
| chr3 | 89650001 | 89750000 | 386 | 487 | 89700000 | -0.13936 | 0.040197 | 0 |
| chr3 | 89900001 | 90000000 | 302 | 390 | 89950000 | -0.17296 | 0.015153 | 0 |
| chr3 | 90150001 | 90250000 | 213 | 276 | 90200000 | -0.17785 | 0.012985 | 0 |
| chr3 | 93800001 | 93900000 | 717 | 907 | 93850000 | -0.14317 | 0.03626  | 0 |
| chr3 | 94100001 | 94200000 | 613 | 787 | 94150000 | -0.16451 | 0.01964  | 0 |
| chr3 | 94700001 | 94800000 | 527 | 671 | 94750000 | -0.15255 | 0.027902 | 0 |
| chr3 | 94800001 | 94900000 | 571 | 729 | 94850000 | -0.15647 | 0.024924 | 0 |
| chr3 | 95200001 | 95300000 | 360 | 456 | 95250000 | -0.14507 | 0.034411 | 0 |
| chr3 | 95450001 | 95550000 | 317 | 409 | 95500000 | -0.17165 | 0.015783 | 0 |
| chr3 | 95900001 | 96000000 | 402 | 520 | 95950000 | -0.17535 | 0.014057 | 0 |
| chr3 | 96200001 | 96300000 | 362 | 469 | 96250000 | -0.17764 | 0.013075 | 0 |
| chr3 | 96450001 | 96550000 | 402 | 523 | 96500000 | -0.18365 | 0.010767 | 0 |
| chr3 | 96500001 | 96600000 | 416 | 528 | 96550000 | -0.14799 | 0.031734 | 0 |
| chr3 | 96550001 | 96650000 | 387 | 489 | 96600000 | -0.14154 | 0.037903 | 0 |
| chr3 | 96800001 | 96900000 | 405 | 526 | 96850000 | -0.18118 | 0.011669 | 0 |
| chr3 | 97100001 | 97200000 | 441 | 558 | 97150000 | -0.14352 | 0.035908 | 0 |
| chr3 | 97150001 | 97250000 | 415 | 531 | 97200000 | -0.15964 | 0.022713 | 0 |
| chr3 | 97300001 | 97400000 | 416 | 528 | 97350000 | -0.14799 | 0.031734 | 0 |
| chr3 | 97800001 | 97900000 | 372 | 474 | 97850000 | -0.15362 | 0.027057 | 0 |
| chr3 | 97900001 | 98000000 | 366 | 465 | 97950000 | -0.14942 | 0.030485 | 0 |
| chr3 | 98100001 | 98200000 | 393 | 495 | 98150000 | -0.13694 | 0.042877 | 0 |
| chr3 | 98900001 | 99000000 | 464 | 601 | 98950000 | -0.17728 | 0.013225 | 0 |
| chr3 | 99300001 | 99400000 | 765 | 981 | 99350000 | -0.16283 | 0.020658 | 0 |
| chr3 | 1E+08    | 1E+08    | 914 | 947 | 1E+08    | 0.144793 | 0.033741 | 0 |
| chr3 | 1E+08    | 1E+08    | 824 | 846 | 1E+08    | 0.15795  | 0.023053 | 0 |
| chr3 | 1.01E+08 | 1.01E+08 | 633 | 799 | 1.01E+08 | -0.14003 | 0.039481 | 0 |
| chr3 | 1.02E+08 | 1.02E+08 | 713 | 912 | 1.02E+08 | -0.15917 | 0.023029 | 0 |
| chr3 | 1.02E+08 | 1.02E+08 | 757 | 966 | 1.02E+08 | -0.15577 | 0.025434 | 0 |
| chr3 | 1.02E+08 | 1.03E+08 | 670 | 861 | 1.03E+08 | -0.16589 | 0.01884  | 0 |
| chr3 | 1.03E+08 | 1.03E+08 | 649 | 817 | 1.03E+08 | -0.13615 | 0.043772 | 0 |
| chr3 | 1.03E+08 | 1.03E+08 | 665 | 845 | 1.03E+08 | -0.14963 | 0.030305 | 0 |
| chr3 | 1.03E+08 | 1.03E+08 | 532 | 675 | 1.03E+08 | -0.1475  | 0.032174 | 0 |
| chr3 | 1.03E+08 | 1.03E+08 | 572 | 720 | 1.03E+08 | -0.13602 | 0.04393  | 0 |

|      |          |          |      |      |          |          |          |   |
|------|----------|----------|------|------|----------|----------|----------|---|
| chr3 | 1.03E+08 | 1.04E+08 | 642  | 812  | 1.04E+08 | -0.14294 | 0.036482 | 0 |
| chr3 | 1.04E+08 | 1.04E+08 | 677  | 863  | 1.04E+08 | -0.15424 | 0.026579 | 0 |
| chr3 | 1.04E+08 | 1.04E+08 | 658  | 845  | 1.04E+08 | -0.1649  | 0.019412 | 0 |
| chr3 | 1.04E+08 | 1.04E+08 | 625  | 794  | 1.04E+08 | -0.14932 | 0.030574 | 0 |
| chr3 | 1.04E+08 | 1.04E+08 | 600  | 775  | 1.04E+08 | -0.17327 | 0.015008 | 0 |
| chr3 | 1.04E+08 | 1.04E+08 | 663  | 834  | 1.04E+08 | -0.13508 | 0.045033 | 0 |
| chr3 | 1.04E+08 | 1.04E+08 | 575  | 722  | 1.04E+08 | -0.13247 | 0.048195 | 0 |
| chr3 | 1.05E+08 | 1.05E+08 | 682  | 887  | 1.05E+08 | -0.1832  | 0.010927 | 0 |
| chr3 | 1.05E+08 | 1.05E+08 | 682  | 863  | 1.05E+08 | -0.14363 | 0.035808 | 0 |
| chr3 | 1.05E+08 | 1.05E+08 | 756  | 977  | 1.05E+08 | -0.17401 | 0.014664 | 0 |
| chr3 | 1.06E+08 | 1.06E+08 | 670  | 870  | 1.06E+08 | -0.18089 | 0.011777 | 0 |
| chr3 | 1.06E+08 | 1.06E+08 | 653  | 845  | 1.06E+08 | -0.17591 | 0.013813 | 0 |
| chr3 | 1.07E+08 | 1.07E+08 | 651  | 831  | 1.07E+08 | -0.15623 | 0.025096 | 0 |
| chr3 | 1.08E+08 | 1.08E+08 | 890  | 927  | 1.08E+08 | 0.137199 | 0.041582 | 0 |
| chr3 | 1.09E+08 | 1.09E+08 | 676  | 864  | 1.09E+08 | -0.15805 | 0.023801 | 0 |
| chr3 | 1.09E+08 | 1.09E+08 | 668  | 870  | 1.09E+08 | -0.1852  | 0.010232 | 0 |
| chr3 | 1.09E+08 | 1.1E+08  | 587  | 737  | 1.09E+08 | -0.13234 | 0.048361 | 0 |
| chr3 | 1.09E+08 | 1.1E+08  | 562  | 719  | 1.1E+08  | -0.15946 | 0.022833 | 0 |
| chr3 | 1.1E+08  | 1.1E+08  | 640  | 826  | 1.1E+08  | -0.17211 | 0.015563 | 0 |
| chr3 | 1.1E+08  | 1.1E+08  | 648  | 830  | 1.1E+08  | -0.16115 | 0.021716 | 0 |
| chr3 | 1.1E+08  | 1.1E+08  | 626  | 791  | 1.1E+08  | -0.14155 | 0.037888 | 0 |
| chr3 | 1.1E+08  | 1.11E+08 | 772  | 803  | 1.11E+08 | 0.139164 | 0.039424 | 0 |
| chr3 | 1.11E+08 | 1.11E+08 | 652  | 829  | 1.11E+08 | -0.15054 | 0.029542 | 0 |
| chr3 | 1.11E+08 | 1.11E+08 | 674  | 860  | 1.11E+08 | -0.15563 | 0.025539 | 0 |
| chr3 | 1.11E+08 | 1.11E+08 | 793  | 999  | 1.11E+08 | -0.1372  | 0.042577 | 0 |
| chr3 | 1.12E+08 | 1.12E+08 | 1046 | 1075 | 1.12E+08 | 0.156509 | 0.024063 | 0 |
| chr3 | 1.12E+08 | 1.12E+08 | 729  | 919  | 1.12E+08 | -0.13818 | 0.04148  | 0 |
| chr3 | 1.12E+08 | 1.12E+08 | 803  | 818  | 1.12E+08 | 0.169262 | 0.016298 | 0 |
| chr3 | 1.12E+08 | 1.12E+08 | 710  | 737  | 1.12E+08 | 0.142117 | 0.036352 | 0 |
| chr3 | 1.12E+08 | 1.13E+08 | 730  | 918  | 1.13E+08 | -0.13463 | 0.045557 | 0 |
| chr3 | 1.14E+08 | 1.14E+08 | 753  | 972  | 1.14E+08 | -0.17234 | 0.015449 | 0 |
| chr3 | 1.14E+08 | 1.14E+08 | 906  | 927  | 1.14E+08 | 0.162905 | 0.019848 | 0 |
| chr3 | 1.16E+08 | 1.16E+08 | 684  | 873  | 1.16E+08 | -0.15602 | 0.025246 | 0 |
| chr3 | 1.16E+08 | 1.16E+08 | 612  | 775  | 1.16E+08 | -0.1447  | 0.034766 | 0 |
| chr3 | 1.17E+08 | 1.17E+08 | 598  | 765  | 1.17E+08 | -0.15935 | 0.022905 | 0 |
| chr3 | 1.17E+08 | 1.17E+08 | 627  | 811  | 1.17E+08 | -0.17527 | 0.014092 | 0 |
| chr3 | 1.17E+08 | 1.18E+08 | 672  | 859  | 1.17E+08 | -0.15823 | 0.02367  | 0 |
| chr3 | 1.18E+08 | 1.18E+08 | 634  | 804  | 1.18E+08 | -0.14675 | 0.032852 | 0 |
| chr3 | 1.18E+08 | 1.18E+08 | 619  | 784  | 1.18E+08 | -0.14495 | 0.034528 | 0 |
| chr3 | 1.18E+08 | 1.18E+08 | 640  | 824  | 1.18E+08 | -0.16861 | 0.01734  | 0 |
| chr3 | 1.18E+08 | 1.19E+08 | 703  | 915  | 1.19E+08 | -0.18428 | 0.010546 | 0 |
| chr3 | 1.19E+08 | 1.19E+08 | 593  | 744  | 1.19E+08 | -0.13131 | 0.049669 | 0 |
| chr3 | 1.19E+08 | 1.19E+08 | 707  | 892  | 1.19E+08 | -0.13937 | 0.040183 | 0 |
| chr3 | 1.2E+08  | 1.2E+08  | 884  | 914  | 1.2E+08  | 0.147815 | 0.03098  | 0 |
| chr3 | 1.22E+08 | 1.22E+08 | 648  | 834  | 1.22E+08 | -0.16809 | 0.017618 | 0 |
| chr3 | 1.22E+08 | 1.22E+08 | 893  | 916  | 1.22E+08 | 0.159276 | 0.022156 | 0 |
| chr3 | 1.22E+08 | 1.22E+08 | 827  | 849  | 1.22E+08 | 0.158086 | 0.02296  | 0 |

|      |          |          |      |      |          |          |          |   |
|------|----------|----------|------|------|----------|----------|----------|---|
| chr3 | 1.22E+08 | 1.23E+08 | 920  | 932  | 1.23E+08 | 0.177267 | 0.012614 | 0 |
| chr3 | 1.23E+08 | 1.23E+08 | 917  | 956  | 1.23E+08 | 0.135874 | 0.043091 | 0 |
| chr3 | 1.23E+08 | 1.23E+08 | 1002 | 1045 | 1.23E+08 | 0.135343 | 0.043709 | 0 |
| chr3 | 1.23E+08 | 1.24E+08 | 897  | 933  | 1.23E+08 | 0.139194 | 0.039392 | 0 |
| chr3 | 1.24E+08 | 1.24E+08 | 788  | 814  | 1.24E+08 | 0.14913  | 0.029839 | 0 |
| chr3 | 1.25E+08 | 1.25E+08 | 1045 | 1078 | 1.25E+08 | 0.151109 | 0.028187 | 0 |
| chr3 | 1.25E+08 | 1.25E+08 | 980  | 1019 | 1.25E+08 | 0.139663 | 0.038891 | 0 |
| chr3 | 1.25E+08 | 1.25E+08 | 784  | 820  | 1.25E+08 | 0.131193 | 0.04878  | 0 |
| chr3 | 1.25E+08 | 1.25E+08 | 824  | 850  | 1.25E+08 | 0.151145 | 0.028158 | 0 |
| chr3 | 1.25E+08 | 1.25E+08 | 538  | 554  | 1.25E+08 | 0.153683 | 0.026153 | 0 |
| chr3 | 1.26E+08 | 1.26E+08 | 232  | 242  | 1.26E+08 | 0.135081 | 0.044016 | 0 |
| chr3 | 1.26E+08 | 1.26E+08 | 987  | 997  | 1.26E+08 | 0.18142  | 0.011005 | 0 |
| chr3 | 1.26E+08 | 1.26E+08 | 954  | 996  | 1.26E+08 | 0.133807 | 0.045534 | 0 |
| chr3 | 1.26E+08 | 1.26E+08 | 984  | 1021 | 1.26E+08 | 0.14271  | 0.035759 | 0 |
| chr3 | 1.26E+08 | 1.26E+08 | 1038 | 1049 | 1.26E+08 | 0.180755 | 0.01125  | 0 |
| chr3 | 1.26E+08 | 1.26E+08 | 1027 | 1069 | 1.26E+08 | 0.138137 | 0.04054  | 0 |
| chr3 | 1.26E+08 | 1.26E+08 | 1139 | 1170 | 1.26E+08 | 0.157222 | 0.023559 | 0 |
| chr3 | 1.26E+08 | 1.26E+08 | 1023 | 1068 | 1.26E+08 | 0.133858 | 0.045472 | 0 |
| chr3 | 1.27E+08 | 1.27E+08 | 1274 | 1298 | 1.27E+08 | 0.169038 | 0.016413 | 0 |
| chr3 | 1.27E+08 | 1.27E+08 | 1174 | 1219 | 1.27E+08 | 0.141697 | 0.036776 | 0 |
| chr3 | 1.28E+08 | 1.28E+08 | 999  | 1042 | 1.28E+08 | 0.135164 | 0.043917 | 0 |
| chr3 | 1.28E+08 | 1.28E+08 | 1246 | 1270 | 1.28E+08 | 0.168439 | 0.016724 | 0 |
| chr3 | 1.28E+08 | 1.28E+08 | 1122 | 1139 | 1.28E+08 | 0.174268 | 0.013899 | 0 |
| chr3 | 1.28E+08 | 1.28E+08 | 1024 | 1065 | 1.28E+08 | 0.139325 | 0.039251 | 0 |
| chr3 | 1.28E+08 | 1.29E+08 | 924  | 951  | 1.29E+08 | 0.154411 | 0.025601 | 0 |
| chr3 | 1.29E+08 | 1.29E+08 | 916  | 951  | 1.29E+08 | 0.141865 | 0.036606 | 0 |
| chr3 | 1.29E+08 | 1.29E+08 | 861  | 882  | 1.29E+08 | 0.161198 | 0.020907 | 0 |
| chr3 | 1.29E+08 | 1.29E+08 | 914  | 954  | 1.29E+08 | 0.134168 | 0.045099 | 0 |
| chr3 | 1.29E+08 | 1.29E+08 | 915  | 944  | 1.29E+08 | 0.150948 | 0.028319 | 0 |
| chr3 | 1.29E+08 | 1.29E+08 | 880  | 920  | 1.29E+08 | 0.131833 | 0.047969 | 0 |
| chr3 | 1.29E+08 | 1.29E+08 | 1028 | 1059 | 1.29E+08 | 0.153101 | 0.026602 | 0 |
| chr3 | 1.29E+08 | 1.3E+08  | 870  | 908  | 1.3E+08  | 0.134286 | 0.044958 | 0 |
| chr3 | 1.32E+08 | 1.32E+08 | 625  | 805  | 1.32E+08 | -0.16917 | 0.017044 | 0 |
| chr3 | 1.33E+08 | 1.33E+08 | 643  | 810  | 1.33E+08 | -0.13714 | 0.042646 | 0 |
| chr3 | 1.33E+08 | 1.33E+08 | 903  | 914  | 1.33E+08 | 0.178495 | 0.012118 | 0 |
| chr3 | 1.35E+08 | 1.35E+08 | 746  | 972  | 1.35E+08 | -0.18582 | 0.010028 | 0 |
| chr3 | 1.35E+08 | 1.35E+08 | 616  | 788  | 1.35E+08 | -0.1593  | 0.022938 | 0 |
| chr3 | 1.35E+08 | 1.36E+08 | 714  | 897  | 1.35E+08 | -0.13322 | 0.047269 | 0 |
| chr3 | 1.36E+08 | 1.36E+08 | 719  | 747  | 1.36E+08 | 0.140847 | 0.037649 | 0 |
| chr3 | 1.36E+08 | 1.36E+08 | 681  | 872  | 1.36E+08 | -0.16071 | 0.022004 | 0 |
| chr3 | 1.37E+08 | 1.37E+08 | 852  | 875  | 1.37E+08 | 0.157533 | 0.023342 | 0 |
| chr3 | 1.37E+08 | 1.37E+08 | 788  | 990  | 1.37E+08 | -0.13327 | 0.047209 | 0 |
| chr3 | 1.37E+08 | 1.37E+08 | 692  | 884  | 1.37E+08 | -0.15731 | 0.024317 | 0 |
| chr3 | 1.37E+08 | 1.37E+08 | 568  | 718  | 1.37E+08 | -0.14213 | 0.037299 | 0 |
| chr3 | 1.37E+08 | 1.37E+08 | 627  | 794  | 1.37E+08 | -0.14471 | 0.034757 | 0 |
| chr3 | 1.38E+08 | 1.38E+08 | 695  | 724  | 1.38E+08 | 0.136986 | 0.041822 | 0 |
| chr3 | 1.39E+08 | 1.4E+08  | 688  | 877  | 1.4E+08  | -0.15421 | 0.026607 | 0 |



|      |          |          |      |      |          |          |          |   |
|------|----------|----------|------|------|----------|----------|----------|---|
| chr3 | 1.4E+08  | 1.4E+08  | 698  | 892  | 1.4E+08  | -0.15785 | 0.023935 | 0 |
| chr3 | 1.4E+08  | 1.4E+08  | 693  | 891  | 1.4E+08  | -0.16661 | 0.018434 | 0 |
| chr3 | 1.4E+08  | 1.4E+08  | 708  | 912  | 1.4E+08  | -0.16932 | 0.016965 | 0 |
| chr3 | 1.41E+08 | 1.41E+08 | 733  | 932  | 1.41E+08 | -0.15055 | 0.029528 | 0 |
| chr3 | 1.41E+08 | 1.41E+08 | 1055 | 1088 | 1.41E+08 | 0.151527 | 0.027848 | 0 |
| chr3 | 1.42E+08 | 1.42E+08 | 859  | 866  | 1.42E+08 | 0.184254 | 0.010012 | 0 |
| chr3 | 1.42E+08 | 1.42E+08 | 756  | 976  | 1.42E+08 | -0.17253 | 0.015358 | 0 |
| chr3 | 1.42E+08 | 1.43E+08 | 775  | 975  | 1.43E+08 | -0.13524 | 0.044836 | 0 |
| chr3 | 1.43E+08 | 1.43E+08 | 883  | 916  | 1.43E+08 | 0.143029 | 0.035445 | 0 |
| chr3 | 1.44E+08 | 1.44E+08 | 669  | 845  | 1.44E+08 | -0.14098 | 0.038477 | 0 |
| chr3 | 1.44E+08 | 1.44E+08 | 657  | 854  | 1.44E+08 | -0.18238 | 0.011223 | 0 |
| chr3 | 1.44E+08 | 1.44E+08 | 650  | 836  | 1.44E+08 | -0.1671  | 0.018159 | 0 |
| chr3 | 1.44E+08 | 1.44E+08 | 675  | 871  | 1.44E+08 | -0.17182 | 0.015702 | 0 |
| chr3 | 1.45E+08 | 1.45E+08 | 630  | 791  | 1.45E+08 | -0.13236 | 0.048334 | 0 |
| chr3 | 1.45E+08 | 1.46E+08 | 627  | 816  | 1.46E+08 | -0.18414 | 0.010596 | 0 |
| chr3 | 1.46E+08 | 1.46E+08 | 618  | 802  | 1.46E+08 | -0.18003 | 0.012108 | 0 |
| chr3 | 1.46E+08 | 1.46E+08 | 617  | 803  | 1.46E+08 | -0.18417 | 0.010587 | 0 |
| chr3 | 1.47E+08 | 1.48E+08 | 572  | 727  | 1.47E+08 | -0.14998 | 0.030013 | 0 |
| chr3 | 1.48E+08 | 1.48E+08 | 636  | 802  | 1.48E+08 | -0.13861 | 0.041007 | 0 |
| chr3 | 1.48E+08 | 1.48E+08 | 628  | 817  | 1.48E+08 | -0.18361 | 0.010782 | 0 |
| chr3 | 1.48E+08 | 1.48E+08 | 602  | 773  | 1.48E+08 | -0.16474 | 0.019505 | 0 |
| chr3 | 1.48E+08 | 1.49E+08 | 706  | 890  | 1.48E+08 | -0.13817 | 0.041489 | 0 |
| chr3 | 1.48E+08 | 1.49E+08 | 701  | 890  | 1.49E+08 | -0.14843 | 0.031349 | 0 |
| chr3 | 1.5E+08  | 1.5E+08  | 795  | 1007 | 1.5E+08  | -0.14507 | 0.034411 | 0 |
| chr3 | 1.51E+08 | 1.51E+08 | 765  | 965  | 1.51E+08 | -0.13911 | 0.040469 | 0 |
| chr3 | 1.51E+08 | 1.51E+08 | 579  | 746  | 1.51E+08 | -0.16965 | 0.016794 | 0 |
| chr3 | 1.51E+08 | 1.52E+08 | 657  | 825  | 1.52E+08 | -0.13254 | 0.048115 | 0 |
| chr3 | 1.52E+08 | 1.52E+08 | 877  | 914  | 1.52E+08 | 0.136346 | 0.042549 | 0 |
| chr3 | 1.53E+08 | 1.53E+08 | 652  | 842  | 1.53E+08 | -0.17299 | 0.015142 | 0 |
| chr3 | 1.53E+08 | 1.53E+08 | 659  | 839  | 1.53E+08 | -0.15243 | 0.027996 | 0 |
| chr3 | 1.53E+08 | 1.53E+08 | 582  | 748  | 1.53E+08 | -0.16606 | 0.018745 | 0 |
| chr3 | 1.53E+08 | 1.53E+08 | 605  | 769  | 1.53E+08 | -0.15009 | 0.029922 | 0 |
| chr3 | 1.54E+08 | 1.54E+08 | 608  | 775  | 1.54E+08 | -0.15416 | 0.02664  | 0 |
| chr3 | 1.54E+08 | 1.54E+08 | 663  | 844  | 1.54E+08 | -0.15227 | 0.028123 | 0 |
| chr3 | 1.54E+08 | 1.54E+08 | 599  | 774  | 1.54E+08 | -0.17381 | 0.014754 | 0 |
| chr3 | 1.55E+08 | 1.55E+08 | 530  | 671  | 1.55E+08 | -0.14436 | 0.035096 | 0 |
| chr3 | 1.55E+08 | 1.55E+08 | 655  | 846  | 1.55E+08 | -0.1732  | 0.015041 | 0 |
| chr3 | 1.57E+08 | 1.57E+08 | 662  | 845  | 1.57E+08 | -0.15616 | 0.025148 | 0 |
| chr3 | 1.57E+08 | 1.58E+08 | 708  | 890  | 1.58E+08 | -0.13409 | 0.046207 | 0 |
| chr3 | 1.58E+08 | 1.58E+08 | 741  | 937  | 1.58E+08 | -0.14261 | 0.036812 | 0 |
| chr3 | 1.58E+08 | 1.58E+08 | 697  | 878  | 1.58E+08 | -0.1371  | 0.042692 | 0 |
| chr3 | 1.58E+08 | 1.58E+08 | 712  | 900  | 1.58E+08 | -0.14208 | 0.037345 | 0 |
| chr3 | 1.58E+08 | 1.58E+08 | 634  | 801  | 1.58E+08 | -0.14136 | 0.03809  | 0 |
| chr3 | 1.59E+08 | 1.59E+08 | 611  | 770  | 1.59E+08 | -0.13772 | 0.041991 | 0 |
| chr3 | 1.61E+08 | 1.61E+08 | 740  | 943  | 1.61E+08 | -0.15377 | 0.026942 | 0 |
| chr3 | 1.61E+08 | 1.61E+08 | 629  | 796  | 1.61E+08 | -0.14375 | 0.035691 | 0 |
| chr3 | 1.61E+08 | 1.62E+08 | 557  | 714  | 1.61E+08 | -0.16228 | 0.020998 | 0 |

|      |          |          |      |      |          |          |          |   |
|------|----------|----------|------|------|----------|----------|----------|---|
| chr3 | 1.62E+08 | 1.62E+08 | 619  | 802  | 1.62E+08 | -0.1777  | 0.013048 | 0 |
| chr3 | 1.62E+08 | 1.62E+08 | 636  | 805  | 1.62E+08 | -0.144   | 0.035443 | 0 |
| chr3 | 1.62E+08 | 1.62E+08 | 526  | 663  | 1.62E+08 | -0.13798 | 0.041701 | 0 |
| chr3 | 1.62E+08 | 1.63E+08 | 540  | 699  | 1.62E+08 | -0.17637 | 0.013611 | 0 |
| chr3 | 1.63E+08 | 1.63E+08 | 527  | 671  | 1.63E+08 | -0.15255 | 0.027902 | 0 |
| chr3 | 1.63E+08 | 1.63E+08 | 571  | 718  | 1.63E+08 | -0.13453 | 0.045682 | 0 |
| chr3 | 1.63E+08 | 1.64E+08 | 586  | 754  | 1.64E+08 | -0.1677  | 0.017829 | 0 |
| chr3 | 1.64E+08 | 1.64E+08 | 552  | 707  | 1.64E+08 | -0.16108 | 0.021765 | 0 |
| chr3 | 1.64E+08 | 1.64E+08 | 536  | 690  | 1.64E+08 | -0.1684  | 0.017451 | 0 |
| chr3 | 1.64E+08 | 1.64E+08 | 556  | 708  | 1.64E+08 | -0.1527  | 0.027779 | 0 |
| chr3 | 1.64E+08 | 1.64E+08 | 543  | 702  | 1.64E+08 | -0.17456 | 0.014414 | 0 |
| chr3 | 1.64E+08 | 1.64E+08 | 600  | 753  | 1.64E+08 | -0.13172 | 0.049138 | 0 |
| chr3 | 1.65E+08 | 1.65E+08 | 597  | 775  | 1.65E+08 | -0.1805  | 0.011926 | 0 |
| chr3 | 1.65E+08 | 1.65E+08 | 592  | 751  | 1.65E+08 | -0.14725 | 0.032395 | 0 |
| chr3 | 1.65E+08 | 1.65E+08 | 623  | 788  | 1.65E+08 | -0.143   | 0.036425 | 0 |
| chr3 | 1.65E+08 | 1.65E+08 | 597  | 772  | 1.65E+08 | -0.17491 | 0.014256 | 0 |
| chr3 | 1.65E+08 | 1.65E+08 | 607  | 768  | 1.65E+08 | -0.14345 | 0.035983 | 0 |
| chr3 | 1.65E+08 | 1.66E+08 | 613  | 773  | 1.66E+08 | -0.13862 | 0.041    | 0 |
| chr3 | 1.66E+08 | 1.66E+08 | 568  | 728  | 1.66E+08 | -0.16208 | 0.021123 | 0 |
| chr3 | 1.66E+08 | 1.66E+08 | 621  | 798  | 1.66E+08 | -0.16583 | 0.018872 | 0 |
| chr3 | 1.66E+08 | 1.67E+08 | 607  | 769  | 1.66E+08 | -0.14532 | 0.034175 | 0 |
| chr3 | 1.66E+08 | 1.67E+08 | 600  | 761  | 1.67E+08 | -0.14697 | 0.03265  | 0 |
| chr3 | 1.67E+08 | 1.67E+08 | 710  | 891  | 1.67E+08 | -0.13164 | 0.049241 | 0 |
| chr3 | 1.69E+08 | 1.69E+08 | 786  | 994  | 1.69E+08 | -0.14275 | 0.036671 | 0 |
| chr3 | 1.69E+08 | 1.69E+08 | 789  | 991  | 1.69E+08 | -0.1329  | 0.047669 | 0 |
| chr3 | 1.69E+08 | 1.69E+08 | 816  | 1024 | 1.69E+08 | -0.13161 | 0.049281 | 0 |
| chr3 | 1.7E+08  | 1.7E+08  | 891  | 899  | 1.7E+08  | 0.183067 | 0.010418 | 0 |
| chr3 | 1.7E+08  | 1.7E+08  | 821  | 1054 | 1.7E+08  | -0.16446 | 0.019673 | 0 |
| chr3 | 1.7E+08  | 1.7E+08  | 795  | 1027 | 1.7E+08  | -0.17345 | 0.014925 | 0 |
| chr3 | 1.71E+08 | 1.71E+08 | 738  | 926  | 1.71E+08 | -0.13143 | 0.049515 | 0 |
| chr3 | 1.71E+08 | 1.71E+08 | 771  | 983  | 1.71E+08 | -0.1545  | 0.026384 | 0 |
| chr3 | 1.72E+08 | 1.72E+08 | 1033 | 1062 | 1.72E+08 | 0.15602  | 0.024415 | 0 |
| chr3 | 1.72E+08 | 1.72E+08 | 965  | 989  | 1.72E+08 | 0.160521 | 0.021339 | 0 |
| chr3 | 1.72E+08 | 1.72E+08 | 845  | 880  | 1.72E+08 | 0.137411 | 0.041345 | 0 |
| chr3 | 1.73E+08 | 1.73E+08 | 879  | 909  | 1.73E+08 | 0.147546 | 0.031218 | 0 |
| chr3 | 1.73E+08 | 1.73E+08 | 700  | 895  | 1.73E+08 | -0.15857 | 0.023438 | 0 |
| chr3 | 1.73E+08 | 1.73E+08 | 660  | 837  | 1.73E+08 | -0.1468  | 0.032807 | 0 |
| chr3 | 1.73E+08 | 1.73E+08 | 649  | 822  | 1.73E+08 | -0.14496 | 0.034522 | 0 |
| chr3 | 1.74E+08 | 1.74E+08 | 652  | 837  | 1.74E+08 | -0.16439 | 0.019712 | 0 |
| chr3 | 1.74E+08 | 1.74E+08 | 673  | 862  | 1.74E+08 | -0.16112 | 0.021739 | 0 |
| chr3 | 1.74E+08 | 1.74E+08 | 670  | 862  | 1.74E+08 | -0.16756 | 0.017904 | 0 |
| chr3 | 1.74E+08 | 1.75E+08 | 623  | 784  | 1.74E+08 | -0.13566 | 0.044349 | 0 |
| chr3 | 1.74E+08 | 1.75E+08 | 609  | 778  | 1.75E+08 | -0.15736 | 0.024279 | 0 |
| chr3 | 1.75E+08 | 1.75E+08 | 635  | 800  | 1.75E+08 | -0.13728 | 0.042487 | 0 |
| chr3 | 1.75E+08 | 1.75E+08 | 658  | 842  | 1.75E+08 | -0.15977 | 0.022625 | 0 |
| chr3 | 1.75E+08 | 1.75E+08 | 653  | 833  | 1.75E+08 | -0.15527 | 0.025802 | 0 |
| chr3 | 1.75E+08 | 1.75E+08 | 572  | 722  | 1.75E+08 | -0.14002 | 0.039488 | 0 |

|      |          |          |     |      |          |          |          |   |
|------|----------|----------|-----|------|----------|----------|----------|---|
| chr3 | 1.75E+08 | 1.76E+08 | 732 | 946  | 1.76E+08 | -0.17403 | 0.014653 | 0 |
| chr3 | 1.76E+08 | 1.76E+08 | 772 | 977  | 1.76E+08 | -0.14379 | 0.035642 | 0 |
| chr3 | 1.76E+08 | 1.76E+08 | 755 | 977  | 1.76E+08 | -0.17592 | 0.013807 | 0 |
| chr3 | 1.76E+08 | 1.76E+08 | 787 | 1012 | 1.76E+08 | -0.16681 | 0.01832  | 0 |
| chr3 | 1.76E+08 | 1.76E+08 | 588 | 764  | 1.76E+08 | -0.18179 | 0.011438 | 0 |
| chr3 | 1.76E+08 | 1.76E+08 | 628 | 788  | 1.76E+08 | -0.13147 | 0.049464 | 0 |
| chr3 | 1.76E+08 | 1.76E+08 | 573 | 731  | 1.76E+08 | -0.15537 | 0.025725 | 0 |
| chr3 | 1.76E+08 | 1.76E+08 | 648 | 834  | 1.76E+08 | -0.16809 | 0.017618 | 0 |
| chr3 | 1.76E+08 | 1.77E+08 | 663 | 843  | 1.76E+08 | -0.15056 | 0.029523 | 0 |
| chr3 | 1.77E+08 | 1.77E+08 | 636 | 827  | 1.77E+08 | -0.1829  | 0.011035 | 0 |
| chr3 | 1.77E+08 | 1.77E+08 | 624 | 792  | 1.77E+08 | -0.14799 | 0.031734 | 0 |
| chr3 | 1.78E+08 | 1.78E+08 | 727 | 912  | 1.78E+08 | -0.13112 | 0.049915 | 0 |
| chr3 | 1.78E+08 | 1.78E+08 | 653 | 837  | 1.78E+08 | -0.16218 | 0.021062 | 0 |
| chr3 | 1.78E+08 | 1.78E+08 | 704 | 897  | 1.78E+08 | -0.15357 | 0.027097 | 0 |
| chr3 | 1.78E+08 | 1.78E+08 | 674 | 850  | 1.78E+08 | -0.13875 | 0.040855 | 0 |
| chr3 | 1.78E+08 | 1.78E+08 | 695 | 873  | 1.78E+08 | -0.13301 | 0.047535 | 0 |
| chr3 | 1.78E+08 | 1.78E+08 | 725 | 915  | 1.78E+08 | -0.13983 | 0.039693 | 0 |
| chr3 | 1.78E+08 | 1.78E+08 | 700 | 881  | 1.78E+08 | -0.13582 | 0.044156 | 0 |
| chr3 | 1.78E+08 | 1.78E+08 | 714 | 901  | 1.78E+08 | -0.13964 | 0.039894 | 0 |
| chr3 | 1.78E+08 | 1.78E+08 | 671 | 844  | 1.78E+08 | -0.13497 | 0.045162 | 0 |
| chr3 | 1.79E+08 | 1.79E+08 | 660 | 839  | 1.79E+08 | -0.15024 | 0.02979  | 0 |
| chr3 | 1.8E+08  | 1.8E+08  | 724 | 931  | 1.8E+08  | -0.16683 | 0.01831  | 0 |
| chr3 | 1.8E+08  | 1.8E+08  | 626 | 808  | 1.8E+08  | -0.17223 | 0.015504 | 0 |
| chr3 | 1.81E+08 | 1.81E+08 | 622 | 797  | 1.81E+08 | -0.1617  | 0.021365 | 0 |
| chr3 | 1.81E+08 | 1.81E+08 | 595 | 772  | 1.81E+08 | -0.17975 | 0.012219 | 0 |
| chr3 | 1.81E+08 | 1.81E+08 | 623 | 784  | 1.81E+08 | -0.13566 | 0.044349 | 0 |
| chr3 | 1.81E+08 | 1.82E+08 | 606 | 761  | 1.82E+08 | -0.13262 | 0.048018 | 0 |
| chr3 | 1.82E+08 | 1.82E+08 | 662 | 853  | 1.82E+08 | -0.16975 | 0.016741 | 0 |
| chr3 | 1.84E+08 | 1.84E+08 | 911 | 928  | 1.84E+08 | 0.169289 | 0.016284 | 0 |
| chr3 | 1.84E+08 | 1.84E+08 | 939 | 961  | 1.84E+08 | 0.162552 | 0.020063 | 0 |
| chr3 | 1.85E+08 | 1.85E+08 | 932 | 957  | 1.85E+08 | 0.157774 | 0.023175 | 0 |
| chr3 | 1.85E+08 | 1.85E+08 | 889 | 918  | 1.85E+08 | 0.149652 | 0.029395 | 0 |
| chr3 | 1.85E+08 | 1.85E+08 | 765 | 778  | 1.85E+08 | 0.171653 | 0.015111 | 0 |
| chr3 | 1.86E+08 | 1.86E+08 | 796 | 811  | 1.86E+08 | 0.16903  | 0.016417 | 0 |
| chr3 | 1.86E+08 | 1.86E+08 | 981 | 1007 | 1.86E+08 | 0.158224 | 0.022865 | 0 |
| chr3 | 1.86E+08 | 1.86E+08 | 925 | 961  | 1.86E+08 | 0.14088  | 0.037614 | 0 |
| chr3 | 1.86E+08 | 1.87E+08 | 847 | 855  | 1.87E+08 | 0.182401 | 0.010652 | 0 |
| chr3 | 1.87E+08 | 1.87E+08 | 777 | 978  | 1.87E+08 | -0.13596 | 0.044001 | 0 |
| chr3 | 1.87E+08 | 1.87E+08 | 655 | 852  | 1.87E+08 | -0.1834  | 0.010857 | 0 |
| chr3 | 1.89E+08 | 1.89E+08 | 737 | 960  | 1.89E+08 | -0.18541 | 0.010165 | 0 |
| chr3 | 1.89E+08 | 1.89E+08 | 809 | 1036 | 1.89E+08 | -0.16085 | 0.021913 | 0 |
| chr3 | 1.9E+08  | 1.9E+08  | 951 | 970  | 1.9E+08  | 0.167424 | 0.017264 | 0 |
| chr3 | 1.91E+08 | 1.91E+08 | 653 | 823  | 1.91E+08 | -0.13785 | 0.041853 | 0 |
| chr3 | 1.92E+08 | 1.92E+08 | 657 | 835  | 1.92E+08 | -0.14992 | 0.030062 | 0 |
| chr3 | 1.92E+08 | 1.92E+08 | 691 | 878  | 1.92E+08 | -0.14957 | 0.030358 | 0 |
| chr3 | 1.93E+08 | 1.93E+08 | 614 | 800  | 1.93E+08 | -0.1858  | 0.010034 | 0 |
| chr3 | 1.93E+08 | 1.93E+08 | 674 | 856  | 1.93E+08 | -0.1489  | 0.030938 | 0 |

|      |          |          |      |      |          |          |          |   |
|------|----------|----------|------|------|----------|----------|----------|---|
| chr3 | 1.93E+08 | 1.93E+08 | 827  | 851  | 1.93E+08 | 0.154691 | 0.025391 | 0 |
| chr3 | 1.93E+08 | 1.93E+08 | 895  | 929  | 1.93E+08 | 0.142172 | 0.036297 | 0 |
| chr3 | 1.94E+08 | 1.94E+08 | 1049 | 1087 | 1.94E+08 | 0.144626 | 0.0339   | 0 |
| chr3 | 1.94E+08 | 1.94E+08 | 961  | 978  | 1.94E+08 | 0.170665 | 0.015592 | 0 |
| chr3 | 1.95E+08 | 1.95E+08 | 350  | 445  | 1.95E+08 | -0.15049 | 0.029584 | 0 |
| chr3 | 1.96E+08 | 1.96E+08 | 859  | 884  | 1.96E+08 | 0.154575 | 0.025478 | 0 |
| chr3 | 1.96E+08 | 1.96E+08 | 676  | 684  | 1.96E+08 | 0.17899  | 0.011923 | 0 |
| chr3 | 1.96E+08 | 1.96E+08 | 931  | 946  | 1.96E+08 | 0.172904 | 0.014521 | 0 |
| chr3 | 1.96E+08 | 1.96E+08 | 862  | 881  | 1.96E+08 | 0.164509 | 0.018895 | 0 |
| chr3 | 1.96E+08 | 1.96E+08 | 946  | 985  | 1.96E+08 | 0.137679 | 0.041046 | 0 |
| chr3 | 1.96E+08 | 1.97E+08 | 880  | 891  | 1.96E+08 | 0.178041 | 0.012299 | 0 |
| chr3 | 1.97E+08 | 1.97E+08 | 903  | 930  | 1.97E+08 | 0.153458 | 0.026326 | 0 |
| chr3 | 1.97E+08 | 1.98E+08 | 901  | 919  | 1.97E+08 | 0.167425 | 0.017263 | 0 |
| chr3 | 1.98E+08 | 1.98E+08 | 46   | 47   | 1.98E+08 | 0.164936 | 0.018648 | 0 |
| chr4 | 650001   | 750000   | 754  | 710  | 7.00E+05 | 0.282709 | 0.000185 | 0 |
| chr4 | 700001   | 800000   | 742  | 682  | 750000   | 0.31761  | 3.23E-05 | 0 |
| chr4 | 750001   | 850000   | 788  | 724  | 8.00E+05 | 0.318169 | 3.14E-05 | 0 |
| chr4 | 800001   | 900000   | 795  | 778  | 850000   | 0.227148 | 0.002084 | 0 |
| chr4 | 950001   | 1050000  | 902  | 819  | 1.00E+06 | 0.335227 | 1.26E-05 | 0 |
| chr4 | 1000001  | 1100000  | 796  | 785  | 1050000  | 0.216039 | 0.003208 | 0 |
| chr4 | 1300001  | 1400000  | 755  | 758  | 1350000  | 0.190242 | 0.008169 | 0 |
| chr4 | 1350001  | 1450000  | 556  | 535  | 1400000  | 0.251509 | 0.000761 | 0 |
| chr4 | 1400001  | 1500000  | 322  | 309  | 1450000  | 0.255417 | 0.000642 | 0 |
| chr4 | 1500001  | 1600000  | 831  | 817  | 1550000  | 0.220475 | 0.002706 | 0 |
| chr4 | 1550001  | 1650000  | 821  | 795  | 1600000  | 0.24239  | 0.00112  | 0 |
| chr4 | 1700001  | 1800000  | 838  | 804  | 1750000  | 0.255718 | 0.000634 | 0 |
| chr4 | 1750001  | 1850000  | 890  | 793  | 1800000  | 0.362448 | 2.68E-06 | 0 |
| chr4 | 1800001  | 1900000  | 802  | 679  | 1850000  | 0.436154 | 2.47E-08 | 0 |
| chr4 | 1850001  | 1950000  | 681  | 659  | 1900000  | 0.243339 | 0.001077 | 0 |
| chr4 | 1900001  | 2000000  | 713  | 711  | 1950000  | 0.200016 | 0.005797 | 0 |
| chr4 | 2150001  | 2250000  | 657  | 653  | 2200000  | 0.204773 | 0.004882 | 0 |
| chr4 | 2200001  | 2300000  | 744  | 726  | 2250000  | 0.231296 | 0.001766 | 0 |
| chr4 | 2400001  | 2500000  | 792  | 765  | 2450000  | 0.246004 | 0.000962 | 0 |
| chr4 | 2750001  | 2850000  | 758  | 752  | 2800000  | 0.207428 | 0.004429 | 0 |
| chr4 | 2800001  | 2900000  | 797  | 726  | 2850000  | 0.330573 | 1.62E-05 | 0 |
| chr4 | 2850001  | 2950000  | 733  | 660  | 2900000  | 0.34731  | 6.41E-06 | 0 |
| chr4 | 2900001  | 3000000  | 694  | 685  | 2950000  | 0.214795 | 0.003363 | 0 |
| chr4 | 3200001  | 3300000  | 758  | 752  | 3250000  | 0.207428 | 0.004429 | 0 |
| chr4 | 3250001  | 3350000  | 737  | 714  | 3300000  | 0.241704 | 0.001153 | 0 |
| chr4 | 3400001  | 3500000  | 836  | 813  | 3450000  | 0.236211 | 0.001446 | 0 |
| chr4 | 3700001  | 3800000  | 868  | 861  | 3750000  | 0.207645 | 0.004394 | 0 |
| chr4 | 3750001  | 3850000  | 857  | 851  | 3800000  | 0.206099 | 0.004651 | 0 |
| chr4 | 6200001  | 6300000  | 758  | 732  | 6250000  | 0.246317 | 0.00095  | 0 |
| chr4 | 6650001  | 6750000  | 734  | 738  | 6700000  | 0.188122 | 0.008784 | 0 |
| chr4 | 6900001  | 7000000  | 700  | 687  | 6950000  | 0.223008 | 0.002452 | 0 |
| chr4 | 6950001  | 7050000  | 740  | 668  | 7.00E+06 | 0.34364  | 7.88E-06 | 0 |
| chr4 | 7000001  | 7100000  | 750  | 681  | 7050000  | 0.335199 | 1.26E-05 | 0 |

|      |          |          |     |     |          |          |          |   |
|------|----------|----------|-----|-----|----------|----------|----------|---|
| chr4 | 7150001  | 7250000  | 815 | 783 | 7200000  | 0.253751 | 0.00069  | 0 |
| chr4 | 7200001  | 7300000  | 819 | 762 | 7250000  | 0.300035 | 7.95E-05 | 0 |
| chr4 | 7250001  | 7350000  | 819 | 784 | 7300000  | 0.258973 | 0.000549 | 0 |
| chr4 | 7300001  | 7400000  | 792 | 760 | 7350000  | 0.255464 | 0.000641 | 0 |
| chr4 | 7350001  | 7450000  | 747 | 748 | 7400000  | 0.194033 | 0.007163 | 0 |
| chr4 | 7800001  | 7900000  | 756 | 747 | 7850000  | 0.213241 | 0.003567 | 0 |
| chr4 | 8050001  | 8150000  | 778 | 761 | 8100000  | 0.227837 | 0.002028 | 0 |
| chr4 | 8100001  | 8200000  | 836 | 797 | 8150000  | 0.264886 | 0.000422 | 0 |
| chr4 | 8350001  | 8450000  | 676 | 665 | 8400000  | 0.219632 | 0.002796 | 0 |
| chr4 | 8400001  | 8500000  | 613 | 606 | 8450000  | 0.212532 | 0.003663 | 0 |
| chr4 | 8550001  | 8650000  | 717 | 677 | 8600000  | 0.27878  | 0.000223 | 0 |
| chr4 | 8800001  | 8900000  | 680 | 643 | 8850000  | 0.276679 | 0.000246 | 0 |
| chr4 | 8850001  | 8950000  | 737 | 706 | 8900000  | 0.257959 | 0.000574 | 0 |
| chr4 | 8900001  | 9000000  | 351 | 341 | 8950000  | 0.237662 | 0.001363 | 0 |
| chr4 | 8950001  | 9050000  | 106 | 104 | 9.00E+06 | 0.223444 | 0.002411 | 0 |
| chr4 | 9000001  | 9100000  | 73  | 73  | 9050000  | 0.195963 | 0.006694 | 0 |
| chr4 | 9050001  | 9150000  | 69  | 64  | 9100000  | 0.304487 | 6.36E-05 | 0 |
| chr4 | 9150001  | 9250000  | 19  | 18  | 9200000  | 0.273966 | 0.000279 | 0 |
| chr4 | 9200001  | 9300000  | 10  | 7   | 9250000  | 0.710536 | 2.09E-18 | 0 |
| chr4 | 9250001  | 9350000  | 1   | 1   | 9300000  | 0.195963 | 0.006694 | 0 |
| chr4 | 9350001  | 9450000  | 53  | 78  | 9400000  | -0.36152 | 4.03E-06 | 0 |
| chr4 | 9400001  | 9500000  | 56  | 99  | 9450000  | -0.62604 | 3.22E-14 | 0 |
| chr4 | 9450001  | 9550000  | 72  | 96  | 9500000  | -0.21907 | 0.003112 | 0 |
| chr4 | 9500001  | 9600000  | 114 | 114 | 9550000  | 0.195963 | 0.006694 | 0 |
| chr4 | 9600001  | 9700000  | 80  | 111 | 9650000  | -0.27652 | 0.000292 | 0 |
| chr4 | 9700001  | 9800000  | 168 | 219 | 9750000  | -0.18651 | 0.009802 | 0 |
| chr4 | 9800001  | 9900000  | 477 | 630 | 9850000  | -0.2054  | 0.005126 | 0 |
| chr4 | 10650001 | 10750000 | 435 | 570 | 10700000 | -0.19398 | 0.007627 | 0 |
| chr4 | 11300001 | 11400000 | 385 | 502 | 11350000 | -0.18687 | 0.009687 | 0 |
| chr4 | 11750001 | 11850000 | 380 | 522 | 11800000 | -0.26209 | 0.000551 | 0 |
| chr4 | 11800001 | 11900000 | 377 | 526 | 11850000 | -0.28454 | 0.000203 | 0 |
| chr4 | 12200001 | 12300000 | 395 | 529 | 12250000 | -0.22545 | 0.002445 | 0 |
| chr4 | 14350001 | 14450000 | 419 | 559 | 14400000 | -0.21994 | 0.003013 | 0 |
| chr4 | 14800001 | 14900000 | 470 | 616 | 14850000 | -0.19431 | 0.007544 | 0 |
| chr4 | 17350001 | 17450000 | 427 | 563 | 17400000 | -0.20294 | 0.005593 | 0 |
| chr4 | 17500001 | 17600000 | 582 | 584 | 17550000 | 0.191014 | 0.007954 | 0 |
| chr4 | 19000001 | 19100000 | 391 | 515 | 19050000 | -0.20144 | 0.005895 | 0 |
| chr4 | 19550001 | 19650000 | 388 | 507 | 19600000 | -0.18997 | 0.008736 | 0 |
| chr4 | 19800001 | 19900000 | 385 | 504 | 19850000 | -0.1926  | 0.007993 | 0 |
| chr4 | 19850001 | 19950000 | 367 | 490 | 19900000 | -0.22104 | 0.002891 | 0 |
| chr4 | 19900001 | 20000000 | 392 | 515 | 19950000 | -0.19776 | 0.006701 | 0 |
| chr4 | 19950001 | 20050000 | 406 | 549 | 2.00E+07 | -0.23936 | 0.001418 | 0 |
| chr4 | 20000001 | 20100000 | 399 | 551 | 20050000 | -0.2697  | 0.000396 | 0 |
| chr4 | 20050001 | 20150000 | 368 | 490 | 20100000 | -0.21711 | 0.003348 | 0 |
| chr4 | 20150001 | 20250000 | 410 | 536 | 20200000 | -0.19065 | 0.008539 | 0 |
| chr4 | 20400001 | 20500000 | 425 | 561 | 20450000 | -0.20457 | 0.005278 | 0 |
| chr4 | 20450001 | 20550000 | 388 | 515 | 20500000 | -0.21255 | 0.00396  | 0 |

|      |          |          |     |     |          |          |          |   |
|------|----------|----------|-----|-----|----------|----------|----------|---|
| chr4 | 21200001 | 21300000 | 423 | 562 | 21250000 | -0.21395 | 0.003763 | 0 |
| chr4 | 21250001 | 21350000 | 458 | 601 | 21300000 | -0.19605 | 0.007106 | 0 |
| chr4 | 22000001 | 22100000 | 351 | 492 | 22050000 | -0.29122 | 0.000149 | 0 |
| chr4 | 22050001 | 22150000 | 328 | 482 | 22100000 | -0.35937 | 4.54E-06 | 0 |
| chr4 | 22750001 | 22850000 | 491 | 647 | 22800000 | -0.20208 | 0.005764 | 0 |
| chr4 | 23200001 | 23300000 | 505 | 667 | 23250000 | -0.20544 | 0.005118 | 0 |
| chr4 | 23400001 | 23500000 | 444 | 613 | 23450000 | -0.26936 | 0.000401 | 0 |
| chr4 | 23450001 | 23550000 | 424 | 557 | 23500000 | -0.19765 | 0.006726 | 0 |
| chr4 | 23600001 | 23700000 | 437 | 573 | 23650000 | -0.19494 | 0.007382 | 0 |
| chr4 | 23650001 | 23750000 | 473 | 621 | 23700000 | -0.19679 | 0.006928 | 0 |
| chr4 | 25300001 | 25400000 | 618 | 610 | 25350000 | 0.214761 | 0.003368 | 0 |
| chr4 | 25350001 | 25450000 | 651 | 611 | 25400000 | 0.287448 | 0.000147 | 0 |
| chr4 | 26750001 | 26850000 | 466 | 635 | 26800000 | -0.25046 | 0.000901 | 0 |
| chr4 | 28050001 | 28150000 | 355 | 481 | 28100000 | -0.24225 | 0.001262 | 0 |
| chr4 | 28750001 | 28850000 | 413 | 542 | 28800000 | -0.19619 | 0.007073 | 0 |
| chr4 | 28950001 | 29050000 | 392 | 558 | 2.90E+07 | -0.31345 | 5.08E-05 | 0 |
| chr4 | 29000001 | 29100000 | 365 | 578 | 29050000 | -0.46721 | 5.74E-09 | 0 |
| chr4 | 29050001 | 29150000 | 397 | 538 | 29100000 | -0.2425  | 0.001249 | 0 |
| chr4 | 29250001 | 29350000 | 377 | 501 | 29300000 | -0.21428 | 0.003717 | 0 |
| chr4 | 29300001 | 29400000 | 400 | 531 | 29350000 | -0.21275 | 0.003932 | 0 |
| chr4 | 29400001 | 29500000 | 361 | 526 | 29450000 | -0.3471  | 8.88E-06 | 0 |
| chr4 | 29450001 | 29550000 | 366 | 520 | 29500000 | -0.3107  | 5.82E-05 | 0 |
| chr4 | 30100001 | 30200000 | 412 | 546 | 30150000 | -0.21029 | 0.0043   | 0 |
| chr4 | 30150001 | 30250000 | 405 | 559 | 30200000 | -0.26896 | 0.000409 | 0 |
| chr4 | 30250001 | 30350000 | 410 | 551 | 30300000 | -0.23047 | 0.002015 | 0 |
| chr4 | 30300001 | 30400000 | 413 | 555 | 30350000 | -0.23038 | 0.002022 | 0 |
| chr4 | 31150001 | 31250000 | 423 | 556 | 31200000 | -0.19846 | 0.006539 | 0 |
| chr4 | 31450001 | 31550000 | 419 | 552 | 31500000 | -0.20175 | 0.00583  | 0 |
| chr4 | 31500001 | 31600000 | 413 | 580 | 31550000 | -0.29395 | 0.000131 | 0 |
| chr4 | 31750001 | 31850000 | 330 | 435 | 31800000 | -0.20259 | 0.005662 | 0 |
| chr4 | 32000001 | 32100000 | 422 | 576 | 32050000 | -0.25286 | 0.000816 | 0 |
| chr4 | 32050001 | 32150000 | 425 | 602 | 32100000 | -0.30634 | 7.21E-05 | 0 |
| chr4 | 32100001 | 32200000 | 443 | 584 | 32150000 | -0.2027  | 0.00564  | 0 |
| chr4 | 32300001 | 32400000 | 424 | 561 | 32350000 | -0.20797 | 0.004675 | 0 |
| chr4 | 32350001 | 32450000 | 384 | 501 | 32400000 | -0.18774 | 0.009409 | 0 |
| chr4 | 32450001 | 32550000 | 390 | 559 | 32500000 | -0.32341 | 3.08E-05 | 0 |
| chr4 | 32650001 | 32750000 | 401 | 526 | 32700000 | -0.1955  | 0.007243 | 0 |
| chr4 | 32800001 | 32900000 | 359 | 481 | 32850000 | -0.22609 | 0.002386 | 0 |
| chr4 | 32850001 | 32950000 | 415 | 552 | 32900000 | -0.21559 | 0.003542 | 0 |
| chr4 | 33050001 | 33150000 | 400 | 562 | 33100000 | -0.29461 | 0.000127 | 0 |
| chr4 | 33250001 | 33350000 | 424 | 558 | 33300000 | -0.20024 | 0.006148 | 0 |
| chr4 | 33850001 | 33950000 | 412 | 539 | 33900000 | -0.19168 | 0.008247 | 0 |
| chr4 | 34550001 | 34650000 | 403 | 535 | 34600000 | -0.2128  | 0.003925 | 0 |
| chr4 | 34600001 | 34700000 | 400 | 531 | 34650000 | -0.21275 | 0.003932 | 0 |
| chr4 | 34650001 | 34750000 | 437 | 575 | 34700000 | -0.19997 | 0.006206 | 0 |
| chr4 | 35600001 | 35700000 | 355 | 466 | 35650000 | -0.19655 | 0.006986 | 0 |
| chr4 | 35650001 | 35750000 | 400 | 527 | 35700000 | -0.20184 | 0.005813 | 0 |

|      |          |          |     |     |          |          |          |   |
|------|----------|----------|-----|-----|----------|----------|----------|---|
| chr4 | 35850001 | 35950000 | 459 | 617 | 35900000 | -0.23081 | 0.001988 | 0 |
| chr4 | 35900001 | 36000000 | 470 | 614 | 35950000 | -0.18961 | 0.008839 | 0 |
| chr4 | 36100001 | 36200000 | 451 | 597 | 36150000 | -0.20864 | 0.004564 | 0 |
| chr4 | 36250001 | 36350000 | 485 | 637 | 36300000 | -0.19735 | 0.006797 | 0 |
| chr4 | 36300001 | 36400000 | 451 | 607 | 36350000 | -0.23261 | 0.001854 | 0 |
| chr4 | 36850001 | 36950000 | 368 | 503 | 36900000 | -0.25489 | 0.000749 | 0 |
| chr4 | 38850001 | 38950000 | 594 | 585 | 38900000 | 0.217989 | 0.002978 | 0 |
| chr4 | 39200001 | 39300000 | 586 | 586 | 39250000 | 0.195963 | 0.006694 | 0 |
| chr4 | 39250001 | 39350000 | 626 | 598 | 39300000 | 0.26198  | 0.000481 | 0 |
| chr4 | 41600001 | 41700000 | 745 | 727 | 41650000 | 0.231248 | 0.001769 | 0 |
| chr4 | 42750001 | 42850000 | 408 | 545 | 42800000 | -0.22172 | 0.002817 | 0 |
| chr4 | 42850001 | 42950000 | 463 | 618 | 42900000 | -0.22063 | 0.002936 | 0 |
| chr4 | 42900001 | 43000000 | 424 | 577 | 42950000 | -0.24854 | 0.000976 | 0 |
| chr4 | 42950001 | 43050000 | 418 | 552 | 4.30E+07 | -0.2052  | 0.005162 | 0 |
| chr4 | 43000001 | 43100000 | 382 | 500 | 43050000 | -0.19239 | 0.00805  | 0 |
| chr4 | 43350001 | 43450000 | 413 | 539 | 43400000 | -0.18818 | 0.009273 | 0 |
| chr4 | 43400001 | 43500000 | 388 | 519 | 43450000 | -0.22371 | 0.002613 | 0 |
| chr4 | 43600001 | 43700000 | 341 | 456 | 43650000 | -0.2233  | 0.002654 | 0 |
| chr4 | 44050001 | 44150000 | 379 | 512 | 44100000 | -0.23798 | 0.001499 | 0 |
| chr4 | 44800001 | 44900000 | 365 | 490 | 44850000 | -0.22892 | 0.00214  | 0 |
| chr4 | 45850001 | 45950000 | 412 | 552 | 45900000 | -0.22606 | 0.002389 | 0 |
| chr4 | 46000001 | 46100000 | 394 | 516 | 46050000 | -0.19321 | 0.00783  | 0 |
| chr4 | 46250001 | 46350000 | 391 | 510 | 46300000 | -0.18737 | 0.009527 | 0 |
| chr4 | 46700001 | 46800000 | 385 | 515 | 46750000 | -0.22375 | 0.002609 | 0 |
| chr4 | 46750001 | 46850000 | 387 | 549 | 46800000 | -0.30851 | 6.49E-05 | 0 |
| chr4 | 47800001 | 47900000 | 557 | 551 | 47850000 | 0.211588 | 0.003795 | 0 |
| chr4 | 47850001 | 47950000 | 550 | 543 | 47900000 | 0.214442 | 0.003409 | 0 |
| chr4 | 49250001 | 49350000 | 58  | 87  | 49300000 | -0.389   | 8.31E-07 | 0 |
| chr4 | 49300001 | 49400000 | 36  | 54  | 49350000 | -0.389   | 8.31E-07 | 0 |
| chr4 | 49450001 | 49550000 | 44  | 67  | 49500000 | -0.41069 | 2.25E-07 | 0 |
| chr4 | 49500001 | 49600000 | 57  | 80  | 49550000 | -0.29308 | 0.000136 | 0 |
| chr4 | 53000001 | 53100000 | 343 | 457 | 53050000 | -0.21802 | 0.003237 | 0 |
| chr4 | 53350001 | 53450000 | 367 | 499 | 53400000 | -0.2473  | 0.001027 | 0 |
| chr4 | 53500001 | 53600000 | 492 | 653 | 53550000 | -0.21246 | 0.003974 | 0 |
| chr4 | 53650001 | 53750000 | 428 | 565 | 53700000 | -0.20468 | 0.005259 | 0 |
| chr4 | 54650001 | 54750000 | 413 | 549 | 54700000 | -0.2147  | 0.00366  | 0 |
| chr4 | 56200001 | 56300000 | 616 | 611 | 56250000 | 0.207721 | 0.004381 | 0 |
| chr4 | 57250001 | 57350000 | 618 | 573 | 57300000 | 0.305035 | 6.18E-05 | 0 |
| chr4 | 57300001 | 57400000 | 577 | 565 | 57350000 | 0.226283 | 0.002156 | 0 |
| chr4 | 57500001 | 57600000 | 511 | 667 | 57550000 | -0.1884  | 0.009205 | 0 |
| chr4 | 57800001 | 57900000 | 637 | 618 | 57850000 | 0.23965  | 0.001255 | 0 |
| chr4 | 58550001 | 58650000 | 406 | 533 | 58600000 | -0.19669 | 0.006951 | 0 |
| chr4 | 58750001 | 58850000 | 359 | 474 | 58800000 | -0.20494 | 0.00521  | 0 |
| chr4 | 58800001 | 58900000 | 365 | 483 | 58850000 | -0.20816 | 0.004643 | 0 |
| chr4 | 58850001 | 58950000 | 373 | 496 | 58900000 | -0.2152  | 0.003593 | 0 |
| chr4 | 59400001 | 59500000 | 373 | 488 | 59450000 | -0.19174 | 0.008229 | 0 |
| chr4 | 59550001 | 59650000 | 358 | 477 | 59600000 | -0.21807 | 0.003231 | 0 |

|      |          |          |     |     |          |          |          |   |
|------|----------|----------|-----|-----|----------|----------|----------|---|
| chr4 | 59700001 | 59800000 | 145 | 203 | 59750000 | -0.28946 | 0.000161 | 0 |
| chr4 | 59750001 | 59850000 | 204 | 296 | 59800000 | -0.34106 | 1.23E-05 | 0 |
| chr4 | 59800001 | 59900000 | 384 | 506 | 59850000 | -0.20207 | 0.005766 | 0 |
| chr4 | 59900001 | 60000000 | 368 | 494 | 59950000 | -0.22884 | 0.002146 | 0 |
| chr4 | 60050001 | 60150000 | 337 | 488 | 60100000 | -0.33817 | 1.43E-05 | 0 |
| chr4 | 60100001 | 60200000 | 370 | 500 | 60150000 | -0.23844 | 0.001471 | 0 |
| chr4 | 60250001 | 60350000 | 348 | 471 | 60300000 | -0.24068 | 0.001345 | 0 |
| chr4 | 60550001 | 60650000 | 373 | 494 | 60600000 | -0.20937 | 0.004445 | 0 |
| chr4 | 60600001 | 60700000 | 375 | 496 | 60650000 | -0.20749 | 0.004757 | 0 |
| chr4 | 60700001 | 60800000 | 350 | 481 | 60750000 | -0.26272 | 0.000536 | 0 |
| chr4 | 61200001 | 61300000 | 359 | 493 | 61250000 | -0.26164 | 0.000562 | 0 |
| chr4 | 61250001 | 61350000 | 371 | 501 | 61300000 | -0.23743 | 0.001532 | 0 |
| chr4 | 61300001 | 61400000 | 356 | 498 | 61350000 | -0.28831 | 0.00017  | 0 |
| chr4 | 61450001 | 61550000 | 346 | 466 | 61500000 | -0.23359 | 0.001783 | 0 |
| chr4 | 61500001 | 61600000 | 322 | 442 | 61550000 | -0.26102 | 0.000577 | 0 |
| chr4 | 61550001 | 61650000 | 331 | 454 | 61600000 | -0.2599  | 0.000606 | 0 |
| chr4 | 61600001 | 61700000 | 379 | 507 | 61650000 | -0.22382 | 0.002602 | 0 |
| chr4 | 61700001 | 61800000 | 373 | 490 | 61750000 | -0.19764 | 0.006727 | 0 |
| chr4 | 61750001 | 61850000 | 358 | 501 | 61800000 | -0.28889 | 0.000166 | 0 |
| chr4 | 61800001 | 61900000 | 309 | 421 | 61850000 | -0.25025 | 0.000909 | 0 |
| chr4 | 61850001 | 61950000 | 318 | 440 | 61900000 | -0.27251 | 0.000349 | 0 |
| chr4 | 62050001 | 62150000 | 371 | 520 | 62100000 | -0.29113 | 0.000149 | 0 |
| chr4 | 62100001 | 62200000 | 336 | 538 | 62150000 | -0.48318 | 1.91E-09 | 0 |
| chr4 | 62150001 | 62250000 | 324 | 498 | 62200000 | -0.42419 | 9.67E-08 | 0 |
| chr4 | 62200001 | 62300000 | 332 | 496 | 62250000 | -0.38319 | 1.17E-06 | 0 |
| chr4 | 62400001 | 62500000 | 383 | 532 | 62450000 | -0.27812 | 0.000272 | 0 |
| chr4 | 62450001 | 62550000 | 352 | 482 | 62500000 | -0.25749 | 0.000671 | 0 |
| chr4 | 62600001 | 62700000 | 286 | 375 | 62650000 | -0.19491 | 0.007389 | 0 |
| chr4 | 62950001 | 63050000 | 337 | 454 | 6.30E+07 | -0.23398 | 0.001756 | 0 |
| chr4 | 63000001 | 63100000 | 353 | 491 | 63050000 | -0.28009 | 0.000248 | 0 |
| chr4 | 63050001 | 63150000 | 406 | 552 | 63100000 | -0.24723 | 0.001031 | 0 |
| chr4 | 63900001 | 64000000 | 308 | 404 | 63950000 | -0.19546 | 0.007252 | 0 |
| chr4 | 63950001 | 64050000 | 312 | 436 | 6.40E+07 | -0.28682 | 0.000183 | 0 |
| chr4 | 64000001 | 64100000 | 310 | 428 | 64050000 | -0.26938 | 0.000401 | 0 |
| chr4 | 64050001 | 64150000 | 297 | 417 | 64100000 | -0.29362 | 0.000133 | 0 |
| chr4 | 64200001 | 64300000 | 337 | 461 | 64250000 | -0.25606 | 0.000713 | 0 |
| chr4 | 64550001 | 64650000 | 370 | 489 | 64600000 | -0.20635 | 0.004955 | 0 |
| chr4 | 64700001 | 64800000 | 373 | 496 | 64750000 | -0.2152  | 0.003593 | 0 |
| chr4 | 64950001 | 65050000 | 335 | 444 | 6.50E+07 | -0.21044 | 0.004278 | 0 |
| chr4 | 65000001 | 65100000 | 357 | 495 | 65050000 | -0.27554 | 0.000305 | 0 |
| chr4 | 65050001 | 65150000 | 389 | 512 | 65100000 | -0.20041 | 0.006111 | 0 |
| chr4 | 65750001 | 65850000 | 403 | 528 | 65800000 | -0.1938  | 0.007676 | 0 |
| chr4 | 65800001 | 65900000 | 381 | 533 | 65850000 | -0.28838 | 0.00017  | 0 |
| chr4 | 65850001 | 65950000 | 381 | 518 | 65900000 | -0.2472  | 0.001032 | 0 |
| chr4 | 66800001 | 66900000 | 390 | 525 | 66850000 | -0.23288 | 0.001834 | 0 |
| chr4 | 66950001 | 67050000 | 376 | 506 | 6.70E+07 | -0.23244 | 0.001866 | 0 |
| chr4 | 67100001 | 67200000 | 395 | 526 | 67150000 | -0.21725 | 0.003331 | 0 |



|      |          |          |     |     |          |          |          |   |
|------|----------|----------|-----|-----|----------|----------|----------|---|
| chr4 | 67450001 | 67550000 | 432 | 587 | 67500000 | -0.24637 | 0.001068 | 0 |
| chr4 | 67500001 | 67600000 | 399 | 557 | 67550000 | -0.28533 | 0.000196 | 0 |
| chr4 | 67550001 | 67650000 | 390 | 514 | 67600000 | -0.20233 | 0.005713 | 0 |
| chr4 | 68650001 | 68750000 | 449 | 605 | 68700000 | -0.23426 | 0.001737 | 0 |
| chr4 | 68850001 | 68950000 | 415 | 549 | 68900000 | -0.20773 | 0.004716 | 0 |
| chr4 | 68900001 | 69000000 | 401 | 526 | 68950000 | -0.1955  | 0.007243 | 0 |
| chr4 | 69600001 | 69700000 | 294 | 407 | 69650000 | -0.27325 | 0.000338 | 0 |
| chr4 | 70100001 | 70200000 | 146 | 196 | 70150000 | -0.22892 | 0.00214  | 0 |
| chr4 | 70150001 | 70250000 | 139 | 218 | 70200000 | -0.45328 | 1.47E-08 | 0 |
| chr4 | 70250001 | 70350000 | 237 | 316 | 70300000 | -0.21907 | 0.003112 | 0 |
| chr4 | 70300001 | 70400000 | 361 | 496 | 70350000 | -0.26238 | 0.000544 | 0 |
| chr4 | 71100001 | 71200000 | 402 | 530 | 71150000 | -0.20283 | 0.005613 | 0 |
| chr4 | 71150001 | 71250000 | 378 | 503 | 71200000 | -0.21621 | 0.003462 | 0 |
| chr4 | 72500001 | 72600000 | 357 | 486 | 72550000 | -0.24907 | 0.000955 | 0 |
| chr4 | 72550001 | 72650000 | 382 | 509 | 72600000 | -0.21813 | 0.003224 | 0 |
| chr4 | 72650001 | 72750000 | 390 | 510 | 72700000 | -0.19106 | 0.008421 | 0 |
| chr4 | 72900001 | 73000000 | 377 | 504 | 72950000 | -0.2229  | 0.002695 | 0 |
| chr4 | 72950001 | 73050000 | 342 | 447 | 7.30E+07 | -0.19032 | 0.008634 | 0 |
| chr4 | 73050001 | 73150000 | 366 | 482 | 73100000 | -0.20123 | 0.005939 | 0 |
| chr4 | 73250001 | 73350000 | 421 | 558 | 73300000 | -0.21048 | 0.00427  | 0 |
| chr4 | 73300001 | 73400000 | 345 | 494 | 73350000 | -0.32195 | 3.31E-05 | 0 |
| chr4 | 73450001 | 73550000 | 334 | 470 | 73500000 | -0.29685 | 0.000114 | 0 |
| chr4 | 73500001 | 73600000 | 324 | 425 | 73550000 | -0.19551 | 0.007241 | 0 |
| chr4 | 73800001 | 73900000 | 442 | 588 | 73850000 | -0.21581 | 0.003514 | 0 |
| chr4 | 73900001 | 74000000 | 587 | 525 | 73950000 | 0.357006 | 3.68E-06 | 0 |
| chr4 | 73950001 | 74050000 | 603 | 584 | 7.40E+07 | 0.242153 | 0.001131 | 0 |
| chr4 | 76350001 | 76450000 | 553 | 528 | 76400000 | 0.262705 | 0.000465 | 0 |
| chr4 | 76400001 | 76500000 | 567 | 568 | 76450000 | 0.193421 | 0.007317 | 0 |
| chr4 | 76800001 | 76900000 | 531 | 532 | 76850000 | 0.193249 | 0.007361 | 0 |
| chr4 | 78150001 | 78250000 | 458 | 598 | 78200000 | -0.18883 | 0.009073 | 0 |
| chr4 | 80200001 | 80300000 | 443 | 582 | 80250000 | -0.19775 | 0.006703 | 0 |
| chr4 | 80600001 | 80700000 | 360 | 495 | 80650000 | -0.26347 | 0.000519 | 0 |
| chr4 | 80650001 | 80750000 | 378 | 515 | 80700000 | -0.25022 | 0.00091  | 0 |
| chr4 | 80950001 | 81050000 | 388 | 511 | 8.10E+07 | -0.2013  | 0.005923 | 0 |
| chr4 | 81000001 | 81100000 | 377 | 494 | 81050000 | -0.19398 | 0.007627 | 0 |
| chr4 | 81500001 | 81600000 | 369 | 488 | 81550000 | -0.2073  | 0.00479  | 0 |
| chr4 | 81850001 | 81950000 | 389 | 508 | 81900000 | -0.1891  | 0.008994 | 0 |
| chr4 | 82050001 | 82150000 | 363 | 481 | 82100000 | -0.2101  | 0.004329 | 0 |
| chr4 | 82200001 | 82300000 | 412 | 550 | 82250000 | -0.22082 | 0.002914 | 0 |
| chr4 | 82250001 | 82350000 | 416 | 587 | 82300000 | -0.30081 | 9.43E-05 | 0 |
| chr4 | 82450001 | 82550000 | 380 | 517 | 82500000 | -0.2482  | 0.00099  | 0 |
| chr4 | 82500001 | 82600000 | 395 | 550 | 82550000 | -0.28162 | 0.000232 | 0 |
| chr4 | 83000001 | 83100000 | 382 | 506 | 83050000 | -0.2096  | 0.004409 | 0 |
| chr4 | 83050001 | 83150000 | 360 | 498 | 83100000 | -0.27219 | 0.000354 | 0 |
| chr4 | 83900001 | 84000000 | 597 | 555 | 83950000 | 0.301206 | 7.50E-05 | 0 |
| chr4 | 83950001 | 84050000 | 590 | 555 | 8.40E+07 | 0.28419  | 0.000172 | 0 |
| chr4 | 84200001 | 84300000 | 656 | 660 | 84250000 | 0.187193 | 0.009066 | 0 |

|      |          |          |     |     |          |          |          |   |
|------|----------|----------|-----|-----|----------|----------|----------|---|
| chr4 | 84250001 | 84350000 | 626 | 579 | 84300000 | 0.308562 | 5.17E-05 | 0 |
| chr4 | 84650001 | 84750000 | 511 | 683 | 84700000 | -0.2226  | 0.002725 | 0 |
| chr4 | 85300001 | 85400000 | 458 | 616 | 85350000 | -0.23162 | 0.001927 | 0 |
| chr4 | 87450001 | 87550000 | 459 | 652 | 87500000 | -0.31041 | 5.91E-05 | 0 |
| chr4 | 87500001 | 87600000 | 435 | 602 | 87550000 | -0.27279 | 0.000345 | 0 |
| chr4 | 88650001 | 88750000 | 397 | 541 | 88700000 | -0.25053 | 0.000899 | 0 |
| chr4 | 90550001 | 90650000 | 477 | 629 | 90600000 | -0.20311 | 0.005559 | 0 |
| chr4 | 91600001 | 91700000 | 371 | 535 | 91650000 | -0.33216 | 1.96E-05 | 0 |
| chr4 | 91650001 | 91750000 | 437 | 573 | 91700000 | -0.19494 | 0.007382 | 0 |
| chr4 | 92400001 | 92500000 | 378 | 499 | 92450000 | -0.20469 | 0.005256 | 0 |
| chr4 | 92700001 | 92800000 | 341 | 481 | 92750000 | -0.3003  | 9.66E-05 | 0 |
| chr4 | 93250001 | 93350000 | 421 | 563 | 93300000 | -0.22335 | 0.002649 | 0 |
| chr4 | 93850001 | 93950000 | 385 | 507 | 93900000 | -0.20116 | 0.005952 | 0 |
| chr4 | 94250001 | 94350000 | 389 | 554 | 94300000 | -0.31415 | 4.91E-05 | 0 |
| chr4 | 94300001 | 94400000 | 435 | 573 | 94350000 | -0.20156 | 0.005871 | 0 |
| chr4 | 94450001 | 94550000 | 340 | 452 | 94500000 | -0.21482 | 0.003644 | 0 |
| chr4 | 94850001 | 94950000 | 433 | 576 | 94900000 | -0.21574 | 0.003523 | 0 |
| chr4 | 95350001 | 95450000 | 661 | 659 | 95400000 | 0.200335 | 0.005731 | 0 |
| chr4 | 95400001 | 95500000 | 616 | 620 | 95450000 | 0.186625 | 0.009243 | 0 |
| chr4 | 95650001 | 95750000 | 474 | 663 | 95700000 | -0.28816 | 0.000172 | 0 |
| chr4 | 96100001 | 96200000 | 414 | 550 | 96150000 | -0.21384 | 0.003778 | 0 |
| chr4 | 96150001 | 96250000 | 394 | 529 | 96200000 | -0.22911 | 0.002124 | 0 |
| chr4 | 96350001 | 96450000 | 395 | 539 | 96400000 | -0.25247 | 0.000829 | 0 |
| chr4 | 96400001 | 96500000 | 399 | 525 | 96450000 | -0.19997 | 0.006206 | 0 |
| chr4 | 96450001 | 96550000 | 392 | 514 | 96500000 | -0.19495 | 0.007379 | 0 |
| chr4 | 96500001 | 96600000 | 383 | 515 | 96550000 | -0.23127 | 0.001953 | 0 |
| chr4 | 97400001 | 97500000 | 368 | 501 | 97450000 | -0.24914 | 0.000952 | 0 |
| chr4 | 97450001 | 97550000 | 366 | 493 | 97500000 | -0.23378 | 0.00177  | 0 |
| chr4 | 97800001 | 97900000 | 400 | 526 | 97850000 | -0.1991  | 0.006396 | 0 |
| chr4 | 98000001 | 98100000 | 333 | 476 | 98050000 | -0.31948 | 3.76E-05 | 0 |
| chr4 | 98050001 | 98150000 | 363 | 510 | 98100000 | -0.29456 | 0.000127 | 0 |
| chr4 | 98300001 | 98400000 | 327 | 440 | 98350000 | -0.23225 | 0.00188  | 0 |
| chr4 | 98350001 | 98450000 | 362 | 483 | 98400000 | -0.22007 | 0.002998 | 0 |
| chr4 | 98450001 | 98550000 | 366 | 478 | 98500000 | -0.1892  | 0.008962 | 0 |
| chr4 | 98600001 | 98700000 | 337 | 484 | 98650000 | -0.3263  | 2.66E-05 | 0 |
| chr4 | 98650001 | 98750000 | 325 | 433 | 98700000 | -0.21796 | 0.003244 | 0 |
| chr4 | 98900001 | 99000000 | 320 | 469 | 98950000 | -0.35555 | 5.60E-06 | 0 |
| chr4 | 98950001 | 99050000 | 408 | 552 | 9.90E+07 | -0.24014 | 0.001375 | 0 |
| chr4 | 99250001 | 99350000 | 401 | 568 | 99300000 | -0.30633 | 7.22E-05 | 0 |
| chr4 | 99300001 | 99400000 | 387 | 556 | 99350000 | -0.32679 | 2.59E-05 | 0 |
| chr4 | 99350001 | 99450000 | 424 | 559 | 99400000 | -0.20282 | 0.005615 | 0 |
| chr4 | 1.01E+08 | 1.01E+08 | 432 | 617 | 1.01E+08 | -0.31828 | 3.99E-05 | 0 |
| chr4 | 1.01E+08 | 1.01E+08 | 462 | 604 | 1.01E+08 | -0.19069 | 0.008525 | 0 |
| chr4 | 1.01E+08 | 1.01E+08 | 417 | 561 | 1.01E+08 | -0.23199 | 0.001899 | 0 |
| chr4 | 1.02E+08 | 1.02E+08 | 408 | 550 | 1.02E+08 | -0.2349  | 0.001694 | 0 |
| chr4 | 1.02E+08 | 1.02E+08 | 381 | 534 | 1.02E+08 | -0.29109 | 0.00015  | 0 |
| chr4 | 1.02E+08 | 1.02E+08 | 434 | 592 | 1.02E+08 | -0.25194 | 0.000848 | 0 |

|      |          |          |     |     |          |          |          |   |
|------|----------|----------|-----|-----|----------|----------|----------|---|
| chr4 | 1.04E+08 | 1.04E+08 | 454 | 600 | 1.04E+08 | -0.20631 | 0.004962 | 0 |
| chr4 | 1.04E+08 | 1.05E+08 | 328 | 430 | 1.05E+08 | -0.19468 | 0.007449 | 0 |
| chr4 | 1.05E+08 | 1.05E+08 | 387 | 516 | 1.05E+08 | -0.21907 | 0.003112 | 0 |
| chr4 | 1.05E+08 | 1.05E+08 | 374 | 495 | 1.05E+08 | -0.20843 | 0.004599 | 0 |
| chr4 | 1.05E+08 | 1.05E+08 | 380 | 496 | 1.05E+08 | -0.18838 | 0.009212 | 0 |
| chr4 | 1.06E+08 | 1.06E+08 | 440 | 576 | 1.06E+08 | -0.1926  | 0.007993 | 0 |
| chr4 | 1.06E+08 | 1.06E+08 | 397 | 542 | 1.06E+08 | -0.25319 | 0.000804 | 0 |
| chr4 | 1.06E+08 | 1.06E+08 | 355 | 531 | 1.06E+08 | -0.38493 | 1.06E-06 | 0 |
| chr4 | 1.06E+08 | 1.06E+08 | 437 | 588 | 1.06E+08 | -0.23222 | 0.001882 | 0 |
| chr4 | 1.08E+08 | 1.08E+08 | 379 | 518 | 1.08E+08 | -0.25479 | 0.000752 | 0 |
| chr4 | 1.08E+08 | 1.08E+08 | 389 | 552 | 1.08E+08 | -0.30894 | 6.35E-05 | 0 |
| chr4 | 1.1E+08  | 1.1E+08  | 442 | 593 | 1.1E+08  | -0.22802 | 0.002215 | 0 |
| chr4 | 1.11E+08 | 1.11E+08 | 440 | 588 | 1.11E+08 | -0.22235 | 0.002751 | 0 |
| chr4 | 1.12E+08 | 1.12E+08 | 405 | 570 | 1.12E+08 | -0.29708 | 0.000113 | 0 |
| chr4 | 1.12E+08 | 1.12E+08 | 368 | 493 | 1.12E+08 | -0.22592 | 0.002402 | 0 |
| chr4 | 1.12E+08 | 1.12E+08 | 345 | 455 | 1.12E+08 | -0.20331 | 0.00552  | 0 |
| chr4 | 1.13E+08 | 1.13E+08 | 482 | 683 | 1.13E+08 | -0.30689 | 7.02E-05 | 0 |
| chr4 | 1.13E+08 | 1.13E+08 | 414 | 604 | 1.13E+08 | -0.34895 | 8.03E-06 | 0 |
| chr4 | 1.14E+08 | 1.14E+08 | 452 | 592 | 1.14E+08 | -0.19331 | 0.007803 | 0 |
| chr4 | 1.15E+08 | 1.15E+08 | 380 | 503 | 1.15E+08 | -0.2086  | 0.004571 | 0 |
| chr4 | 1.15E+08 | 1.15E+08 | 376 | 508 | 1.15E+08 | -0.23813 | 0.00149  | 0 |
| chr4 | 1.15E+08 | 1.15E+08 | 375 | 521 | 1.15E+08 | -0.27843 | 0.000268 | 0 |
| chr4 | 1.15E+08 | 1.15E+08 | 396 | 538 | 1.15E+08 | -0.24614 | 0.001077 | 0 |
| chr4 | 1.16E+08 | 1.16E+08 | 377 | 532 | 1.16E+08 | -0.3009  | 9.39E-05 | 0 |
| chr4 | 1.16E+08 | 1.16E+08 | 364 | 518 | 1.16E+08 | -0.31305 | 5.18E-05 | 0 |
| chr4 | 1.17E+08 | 1.17E+08 | 359 | 475 | 1.17E+08 | -0.20798 | 0.004674 | 0 |
| chr4 | 1.17E+08 | 1.17E+08 | 334 | 457 | 1.17E+08 | -0.25638 | 0.000703 | 0 |
| chr4 | 1.17E+08 | 1.17E+08 | 337 | 451 | 1.17E+08 | -0.22442 | 0.002544 | 0 |
| chr4 | 1.17E+08 | 1.18E+08 | 367 | 540 | 1.17E+08 | -0.36122 | 4.10E-06 | 0 |
| chr4 | 1.17E+08 | 1.18E+08 | 381 | 503 | 1.18E+08 | -0.2048  | 0.005235 | 0 |
| chr4 | 1.18E+08 | 1.18E+08 | 359 | 484 | 1.18E+08 | -0.23506 | 0.001683 | 0 |
| chr4 | 1.18E+08 | 1.18E+08 | 395 | 533 | 1.18E+08 | -0.23632 | 0.001601 | 0 |
| chr4 | 1.18E+08 | 1.18E+08 | 390 | 523 | 1.18E+08 | -0.22737 | 0.002271 | 0 |
| chr4 | 1.19E+08 | 1.19E+08 | 385 | 506 | 1.19E+08 | -0.19832 | 0.006573 | 0 |
| chr4 | 1.19E+08 | 1.19E+08 | 444 | 583 | 1.19E+08 | -0.19697 | 0.006885 | 0 |
| chr4 | 1.19E+08 | 1.2E+08  | 46  | 68  | 1.19E+08 | -0.36794 | 2.81E-06 | 0 |
| chr4 | 1.19E+08 | 1.2E+08  | 89  | 118 | 1.2E+08  | -0.21095 | 0.004199 | 0 |
| chr4 | 1.2E+08  | 1.2E+08  | 500 | 500 | 1.2E+08  | 0.195963 | 0.006694 | 0 |
| chr4 | 1.2E+08  | 1.2E+08  | 70  | 104 | 1.2E+08  | -0.37519 | 1.86E-06 | 0 |
| chr4 | 1.21E+08 | 1.21E+08 | 447 | 584 | 1.21E+08 | -0.18973 | 0.008805 | 0 |
| chr4 | 1.21E+08 | 1.21E+08 | 351 | 538 | 1.21E+08 | -0.42017 | 1.25E-07 | 0 |
| chr4 | 1.21E+08 | 1.22E+08 | 386 | 505 | 1.21E+08 | -0.19172 | 0.008236 | 0 |
| chr4 | 1.22E+08 | 1.22E+08 | 397 | 522 | 1.22E+08 | -0.19895 | 0.00643  | 0 |
| chr4 | 1.23E+08 | 1.23E+08 | 646 | 625 | 1.23E+08 | 0.243641 | 0.001063 | 0 |
| chr4 | 1.23E+08 | 1.23E+08 | 448 | 587 | 1.23E+08 | -0.1939  | 0.007649 | 0 |
| chr4 | 1.24E+08 | 1.25E+08 | 479 | 625 | 1.25E+08 | -0.18787 | 0.00937  | 0 |
| chr4 | 1.25E+08 | 1.25E+08 | 453 | 597 | 1.25E+08 | -0.20226 | 0.005728 | 0 |

|      |          |          |     |     |          |          |          |   |
|------|----------|----------|-----|-----|----------|----------|----------|---|
| chr4 | 1.25E+08 | 1.25E+08 | 421 | 553 | 1.25E+08 | -0.1975  | 0.006762 | 0 |
| chr4 | 1.26E+08 | 1.26E+08 | 485 | 640 | 1.26E+08 | -0.20412 | 0.005363 | 0 |
| chr4 | 1.26E+08 | 1.26E+08 | 448 | 619 | 1.26E+08 | -0.27048 | 0.000382 | 0 |
| chr4 | 1.26E+08 | 1.26E+08 | 450 | 590 | 1.26E+08 | -0.19483 | 0.007411 | 0 |
| chr4 | 1.27E+08 | 1.27E+08 | 345 | 478 | 1.27E+08 | -0.27445 | 0.00032  | 0 |
| chr4 | 1.27E+08 | 1.27E+08 | 425 | 589 | 1.27E+08 | -0.27484 | 0.000315 | 0 |
| chr4 | 1.28E+08 | 1.28E+08 | 387 | 548 | 1.28E+08 | -0.30588 | 7.38E-05 | 0 |
| chr4 | 1.28E+08 | 1.28E+08 | 381 | 509 | 1.28E+08 | -0.22191 | 0.002797 | 0 |
| chr4 | 1.28E+08 | 1.28E+08 | 410 | 548 | 1.28E+08 | -0.22259 | 0.002727 | 0 |
| chr4 | 1.29E+08 | 1.3E+08  | 525 | 698 | 1.29E+08 | -0.21495 | 0.003627 | 0 |
| chr4 | 1.3E+08  | 1.3E+08  | 425 | 563 | 1.3E+08  | -0.20971 | 0.004392 | 0 |
| chr4 | 1.31E+08 | 1.31E+08 | 417 | 547 | 1.31E+08 | -0.19553 | 0.007235 | 0 |
| chr4 | 1.31E+08 | 1.31E+08 | 403 | 532 | 1.31E+08 | -0.20468 | 0.005258 | 0 |
| chr4 | 1.32E+08 | 1.32E+08 | 393 | 532 | 1.32E+08 | -0.24093 | 0.001331 | 0 |
| chr4 | 1.32E+08 | 1.32E+08 | 391 | 522 | 1.32E+08 | -0.22092 | 0.002904 | 0 |
| chr4 | 1.32E+08 | 1.32E+08 | 376 | 507 | 1.32E+08 | -0.23529 | 0.001668 | 0 |
| chr4 | 1.32E+08 | 1.32E+08 | 373 | 496 | 1.32E+08 | -0.2152  | 0.003593 | 0 |
| chr4 | 1.32E+08 | 1.33E+08 | 395 | 515 | 1.33E+08 | -0.18676 | 0.009722 | 0 |
| chr4 | 1.33E+08 | 1.33E+08 | 336 | 464 | 1.33E+08 | -0.2697  | 0.000396 | 0 |
| chr4 | 1.33E+08 | 1.33E+08 | 182 | 241 | 1.33E+08 | -0.20913 | 0.004484 | 0 |
| chr4 | 1.33E+08 | 1.33E+08 | 41  | 73  | 1.33E+08 | -0.63631 | 1.36E-14 | 0 |
| chr4 | 1.33E+08 | 1.33E+08 | 47  | 81  | 1.33E+08 | -0.5893  | 6.54E-13 | 0 |
| chr4 | 1.33E+08 | 1.33E+08 | 64  | 85  | 1.33E+08 | -0.21343 | 0.003836 | 0 |
| chr4 | 1.33E+08 | 1.33E+08 | 382 | 535 | 1.33E+08 | -0.29    | 0.000157 | 0 |
| chr4 | 1.34E+08 | 1.34E+08 | 428 | 568 | 1.34E+08 | -0.21232 | 0.003995 | 0 |
| chr4 | 1.34E+08 | 1.34E+08 | 398 | 533 | 1.34E+08 | -0.2254  | 0.00245  | 0 |
| chr4 | 1.34E+08 | 1.35E+08 | 385 | 505 | 1.34E+08 | -0.19546 | 0.007252 | 0 |
| chr4 | 1.35E+08 | 1.35E+08 | 393 | 513 | 1.35E+08 | -0.18847 | 0.009185 | 0 |
| chr4 | 1.35E+08 | 1.35E+08 | 395 | 521 | 1.35E+08 | -0.20347 | 0.005489 | 0 |
| chr4 | 1.36E+08 | 1.36E+08 | 347 | 484 | 1.36E+08 | -0.28411 | 0.000207 | 0 |
| chr4 | 1.36E+08 | 1.36E+08 | 332 | 441 | 1.36E+08 | -0.21363 | 0.003807 | 0 |
| chr4 | 1.36E+08 | 1.36E+08 | 338 | 460 | 1.36E+08 | -0.24865 | 0.000972 | 0 |
| chr4 | 1.36E+08 | 1.36E+08 | 359 | 474 | 1.36E+08 | -0.20494 | 0.00521  | 0 |
| chr4 | 1.36E+08 | 1.36E+08 | 372 | 510 | 1.36E+08 | -0.25923 | 0.000623 | 0 |
| chr4 | 1.36E+08 | 1.37E+08 | 382 | 525 | 1.36E+08 | -0.26278 | 0.000535 | 0 |
| chr4 | 1.37E+08 | 1.37E+08 | 355 | 483 | 1.37E+08 | -0.24824 | 0.000988 | 0 |
| chr4 | 1.37E+08 | 1.37E+08 | 390 | 520 | 1.37E+08 | -0.21907 | 0.003112 | 0 |
| chr4 | 1.37E+08 | 1.37E+08 | 426 | 586 | 1.37E+08 | -0.26408 | 0.000506 | 0 |
| chr4 | 1.37E+08 | 1.37E+08 | 409 | 580 | 1.37E+08 | -0.30799 | 6.65E-05 | 0 |
| chr4 | 1.39E+08 | 1.39E+08 | 442 | 599 | 1.39E+08 | -0.24255 | 0.001247 | 0 |
| chr4 | 1.4E+08  | 1.4E+08  | 595 | 588 | 1.4E+08  | 0.213037 | 0.003594 | 0 |
| chr4 | 1.43E+08 | 1.43E+08 | 424 | 582 | 1.43E+08 | -0.26099 | 0.000578 | 0 |
| chr4 | 1.43E+08 | 1.43E+08 | 475 | 622 | 1.43E+08 | -0.19302 | 0.00788  | 0 |
| chr4 | 1.44E+08 | 1.44E+08 | 376 | 494 | 1.44E+08 | -0.19782 | 0.006687 | 0 |
| chr4 | 1.45E+08 | 1.45E+08 | 412 | 540 | 1.45E+08 | -0.19435 | 0.007532 | 0 |
| chr4 | 1.45E+08 | 1.45E+08 | 87  | 124 | 1.45E+08 | -0.31529 | 4.64E-05 | 0 |
| chr4 | 1.45E+08 | 1.45E+08 | 76  | 113 | 1.45E+08 | -0.37629 | 1.74E-06 | 0 |

|      |          |          |     |     |          |          |          |   |
|------|----------|----------|-----|-----|----------|----------|----------|---|
| chr4 | 1.45E+08 | 1.45E+08 | 94  | 126 | 1.45E+08 | -0.22673 | 0.002328 | 0 |
| chr4 | 1.45E+08 | 1.45E+08 | 360 | 470 | 1.45E+08 | -0.1887  | 0.009114 | 0 |
| chr4 | 1.46E+08 | 1.46E+08 | 399 | 548 | 1.46E+08 | -0.26182 | 0.000557 | 0 |
| chr4 | 1.46E+08 | 1.46E+08 | 352 | 474 | 1.46E+08 | -0.23335 | 0.0018   | 0 |
| chr4 | 1.46E+08 | 1.46E+08 | 406 | 388 | 1.46E+08 | 0.261386 | 0.000493 | 0 |
| chr4 | 1.46E+08 | 1.46E+08 | 500 | 491 | 1.46E+08 | 0.222168 | 0.002534 | 0 |
| chr4 | 1.47E+08 | 1.47E+08 | 502 | 667 | 1.47E+08 | -0.21404 | 0.003751 | 0 |
| chr4 | 1.47E+08 | 1.47E+08 | 483 | 646 | 1.47E+08 | -0.22355 | 0.002629 | 0 |
| chr4 | 1.47E+08 | 1.47E+08 | 450 | 601 | 1.47E+08 | -0.22148 | 0.002844 | 0 |
| chr4 | 1.47E+08 | 1.48E+08 | 380 | 510 | 1.48E+08 | -0.22853 | 0.002172 | 0 |
| chr4 | 1.49E+08 | 1.49E+08 | 452 | 596 | 1.49E+08 | -0.20303 | 0.005575 | 0 |
| chr4 | 1.49E+08 | 1.49E+08 | 426 | 570 | 1.49E+08 | -0.22415 | 0.00257  | 0 |
| chr4 | 1.49E+08 | 1.49E+08 | 480 | 638 | 1.49E+08 | -0.21456 | 0.00368  | 0 |
| chr4 | 1.49E+08 | 1.49E+08 | 495 | 683 | 1.49E+08 | -0.26849 | 0.000417 | 0 |
| chr4 | 1.49E+08 | 1.49E+08 | 458 | 598 | 1.49E+08 | -0.18883 | 0.009073 | 0 |
| chr4 | 1.5E+08  | 1.5E+08  | 418 | 571 | 1.5E+08  | -0.25402 | 0.000777 | 0 |
| chr4 | 1.5E+08  | 1.5E+08  | 429 | 559 | 1.5E+08  | -0.18591 | 0.009998 | 0 |
| chr4 | 1.5E+08  | 1.5E+08  | 403 | 530 | 1.5E+08  | -0.19925 | 0.006363 | 0 |
| chr4 | 1.55E+08 | 1.55E+08 | 474 | 631 | 1.55E+08 | -0.21679 | 0.003388 | 0 |
| chr4 | 1.55E+08 | 1.55E+08 | 486 | 639 | 1.55E+08 | -0.1989  | 0.006442 | 0 |
| chr4 | 1.55E+08 | 1.55E+08 | 444 | 579 | 1.55E+08 | -0.18704 | 0.009631 | 0 |
| chr4 | 1.55E+08 | 1.55E+08 | 457 | 603 | 1.55E+08 | -0.204   | 0.005386 | 0 |
| chr4 | 1.55E+08 | 1.55E+08 | 397 | 544 | 1.55E+08 | -0.2585  | 0.000643 | 0 |
| chr4 | 1.56E+08 | 1.56E+08 | 369 | 503 | 1.56E+08 | -0.25097 | 0.000882 | 0 |
| chr4 | 1.56E+08 | 1.56E+08 | 424 | 571 | 1.56E+08 | -0.23346 | 0.001792 | 0 |
| chr4 | 1.57E+08 | 1.57E+08 | 423 | 554 | 1.57E+08 | -0.19327 | 0.007816 | 0 |
| chr4 | 1.58E+08 | 1.58E+08 | 378 | 502 | 1.58E+08 | -0.21334 | 0.003848 | 0 |
| chr4 | 1.59E+08 | 1.59E+08 | 449 | 589 | 1.59E+08 | -0.19559 | 0.00722  | 0 |
| chr4 | 1.6E+08  | 1.61E+08 | 426 | 578 | 1.6E+08  | -0.24425 | 0.001164 | 0 |
| chr4 | 1.61E+08 | 1.61E+08 | 363 | 477 | 1.61E+08 | -0.19806 | 0.006632 | 0 |
| chr4 | 1.61E+08 | 1.61E+08 | 377 | 508 | 1.61E+08 | -0.2343  | 0.001734 | 0 |
| chr4 | 1.61E+08 | 1.61E+08 | 384 | 524 | 1.61E+08 | -0.2525  | 0.000828 | 0 |
| chr4 | 1.61E+08 | 1.61E+08 | 407 | 536 | 1.61E+08 | -0.20124 | 0.005936 | 0 |
| chr4 | 1.62E+08 | 1.62E+08 | 379 | 511 | 1.62E+08 | -0.23516 | 0.001676 | 0 |
| chr4 | 1.63E+08 | 1.63E+08 | 379 | 506 | 1.63E+08 | -0.22098 | 0.002898 | 0 |
| chr4 | 1.63E+08 | 1.63E+08 | 367 | 555 | 1.63E+08 | -0.40074 | 4.12E-07 | 0 |
| chr4 | 1.63E+08 | 1.63E+08 | 339 | 499 | 1.63E+08 | -0.36179 | 3.97E-06 | 0 |
| chr4 | 1.63E+08 | 1.63E+08 | 349 | 459 | 1.63E+08 | -0.1993  | 0.006351 | 0 |
| chr4 | 1.63E+08 | 1.63E+08 | 354 | 473 | 1.63E+08 | -0.22213 | 0.002775 | 0 |
| chr4 | 1.63E+08 | 1.63E+08 | 381 | 536 | 1.63E+08 | -0.29648 | 0.000116 | 0 |
| chr4 | 1.63E+08 | 1.63E+08 | 385 | 505 | 1.63E+08 | -0.19546 | 0.007252 | 0 |
| chr4 | 1.63E+08 | 1.63E+08 | 410 | 570 | 1.63E+08 | -0.27937 | 0.000257 | 0 |
| chr4 | 1.63E+08 | 1.63E+08 | 403 | 539 | 1.63E+08 | -0.22354 | 0.00263  | 0 |
| chr4 | 1.63E+08 | 1.63E+08 | 380 | 496 | 1.63E+08 | -0.18838 | 0.009212 | 0 |
| chr4 | 1.63E+08 | 1.64E+08 | 409 | 549 | 1.64E+08 | -0.22874 | 0.002154 | 0 |
| chr4 | 1.64E+08 | 1.64E+08 | 368 | 531 | 1.64E+08 | -0.33304 | 1.87E-05 | 0 |
| chr4 | 1.64E+08 | 1.64E+08 | 396 | 553 | 1.64E+08 | -0.28582 | 0.000191 | 0 |

|      |          |          |     |     |          |          |          |   |
|------|----------|----------|-----|-----|----------|----------|----------|---|
| chr4 | 1.64E+08 | 1.64E+08 | 415 | 556 | 1.64E+08 | -0.22601 | 0.002393 | 0 |
| chr4 | 1.65E+08 | 1.65E+08 | 358 | 506 | 1.65E+08 | -0.30321 | 8.40E-05 | 0 |
| chr4 | 1.65E+08 | 1.65E+08 | 408 | 539 | 1.65E+08 | -0.20575 | 0.005061 | 0 |
| chr4 | 1.65E+08 | 1.66E+08 | 336 | 441 | 1.66E+08 | -0.19635 | 0.007033 | 0 |
| chr4 | 1.66E+08 | 1.66E+08 | 342 | 447 | 1.66E+08 | -0.19032 | 0.008634 | 0 |
| chr4 | 1.66E+08 | 1.66E+08 | 483 | 480 | 1.66E+08 | 0.204952 | 0.00485  | 0 |
| chr4 | 1.66E+08 | 1.66E+08 | 455 | 455 | 1.66E+08 | 0.195963 | 0.006694 | 0 |
| chr4 | 1.67E+08 | 1.67E+08 | 450 | 589 | 1.67E+08 | -0.19238 | 0.008054 | 0 |
| chr4 | 1.67E+08 | 1.67E+08 | 454 | 593 | 1.67E+08 | -0.18938 | 0.00891  | 0 |
| chr4 | 1.67E+08 | 1.67E+08 | 433 | 593 | 1.67E+08 | -0.2577  | 0.000665 | 0 |
| chr4 | 1.67E+08 | 1.67E+08 | 369 | 495 | 1.67E+08 | -0.22784 | 0.00223  | 0 |
| chr4 | 1.67E+08 | 1.68E+08 | 369 | 521 | 1.67E+08 | -0.3017  | 9.03E-05 | 0 |
| chr4 | 1.67E+08 | 1.68E+08 | 389 | 515 | 1.68E+08 | -0.20884 | 0.004532 | 0 |
| chr4 | 1.68E+08 | 1.68E+08 | 365 | 478 | 1.68E+08 | -0.19315 | 0.007846 | 0 |
| chr4 | 1.68E+08 | 1.68E+08 | 348 | 466 | 1.68E+08 | -0.22528 | 0.002461 | 0 |
| chr4 | 1.69E+08 | 1.7E+08  | 708 | 692 | 1.7E+08  | 0.22894  | 0.00194  | 0 |
| chr4 | 1.7E+08  | 1.7E+08  | 750 | 706 | 1.7E+08  | 0.283185 | 0.000181 | 0 |
| chr4 | 1.7E+08  | 1.7E+08  | 423 | 559 | 1.7E+08  | -0.20623 | 0.004977 | 0 |
| chr4 | 1.7E+08  | 1.71E+08 | 423 | 563 | 1.7E+08  | -0.21651 | 0.003423 | 0 |
| chr4 | 1.71E+08 | 1.71E+08 | 533 | 491 | 1.71E+08 | 0.314376 | 3.83E-05 | 0 |
| chr4 | 1.71E+08 | 1.72E+08 | 410 | 555 | 1.72E+08 | -0.2409  | 0.001333 | 0 |
| chr4 | 1.72E+08 | 1.72E+08 | 372 | 504 | 1.72E+08 | -0.24216 | 0.001267 | 0 |
| chr4 | 1.72E+08 | 1.72E+08 | 386 | 514 | 1.72E+08 | -0.2172  | 0.003337 | 0 |
| chr4 | 1.72E+08 | 1.72E+08 | 432 | 565 | 1.72E+08 | -0.19126 | 0.008365 | 0 |
| chr4 | 1.72E+08 | 1.72E+08 | 422 | 594 | 1.72E+08 | -0.29726 | 0.000112 | 0 |
| chr4 | 1.72E+08 | 1.72E+08 | 435 | 583 | 1.72E+08 | -0.22652 | 0.002347 | 0 |
| chr4 | 1.72E+08 | 1.72E+08 | 394 | 523 | 1.72E+08 | -0.21265 | 0.003946 | 0 |
| chr4 | 1.72E+08 | 1.72E+08 | 414 | 555 | 1.72E+08 | -0.22689 | 0.002314 | 0 |
| chr4 | 1.73E+08 | 1.73E+08 | 394 | 553 | 1.73E+08 | -0.29312 | 0.000136 | 0 |
| chr4 | 1.73E+08 | 1.73E+08 | 412 | 539 | 1.73E+08 | -0.19168 | 0.008247 | 0 |
| chr4 | 1.73E+08 | 1.73E+08 | 422 | 552 | 1.73E+08 | -0.19146 | 0.008307 | 0 |
| chr4 | 1.73E+08 | 1.73E+08 | 395 | 552 | 1.73E+08 | -0.28685 | 0.000182 | 0 |
| chr4 | 1.76E+08 | 1.76E+08 | 509 | 502 | 1.76E+08 | 0.215941 | 0.00322  | 0 |
| chr4 | 1.76E+08 | 1.76E+08 | 384 | 511 | 1.76E+08 | -0.21625 | 0.003456 | 0 |
| chr4 | 1.76E+08 | 1.76E+08 | 384 | 540 | 1.76E+08 | -0.29589 | 0.000119 | 0 |
| chr4 | 1.76E+08 | 1.76E+08 | 406 | 547 | 1.76E+08 | -0.2341  | 0.001748 | 0 |
| chr4 | 1.76E+08 | 1.76E+08 | 409 | 535 | 1.76E+08 | -0.19148 | 0.008304 | 0 |
| chr4 | 1.76E+08 | 1.76E+08 | 352 | 470 | 1.76E+08 | -0.22112 | 0.002882 | 0 |
| chr4 | 1.76E+08 | 1.77E+08 | 379 | 508 | 1.76E+08 | -0.22667 | 0.002334 | 0 |
| chr4 | 1.77E+08 | 1.77E+08 | 442 | 607 | 1.77E+08 | -0.26169 | 0.000561 | 0 |
| chr4 | 1.77E+08 | 1.77E+08 | 451 | 589 | 1.77E+08 | -0.18918 | 0.00897  | 0 |
| chr4 | 1.77E+08 | 1.77E+08 | 456 | 598 | 1.77E+08 | -0.19515 | 0.00733  | 0 |
| chr4 | 1.78E+08 | 1.78E+08 | 375 | 511 | 1.78E+08 | -0.25047 | 0.000901 | 0 |
| chr4 | 1.78E+08 | 1.78E+08 | 436 | 589 | 1.78E+08 | -0.23798 | 0.001499 | 0 |
| chr4 | 1.78E+08 | 1.78E+08 | 401 | 541 | 1.78E+08 | -0.23606 | 0.001617 | 0 |
| chr4 | 1.79E+08 | 1.79E+08 | 408 | 550 | 1.79E+08 | -0.2349  | 0.001694 | 0 |
| chr4 | 1.79E+08 | 1.79E+08 | 388 | 514 | 1.79E+08 | -0.20975 | 0.004385 | 0 |

|      |          |          |     |     |          |          |          |   |
|------|----------|----------|-----|-----|----------|----------|----------|---|
| chr4 | 1.79E+08 | 1.79E+08 | 399 | 533 | 1.79E+08 | -0.22178 | 0.002811 | 0 |
| chr4 | 1.79E+08 | 1.79E+08 | 370 | 544 | 1.79E+08 | -0.36012 | 4.35E-06 | 0 |
| chr4 | 1.79E+08 | 1.79E+08 | 354 | 509 | 1.79E+08 | -0.32795 | 2.44E-05 | 0 |
| chr4 | 1.8E+08  | 1.8E+08  | 405 | 532 | 1.8E+08  | -0.19754 | 0.006751 | 0 |
| chr4 | 1.81E+08 | 1.81E+08 | 380 | 523 | 1.81E+08 | -0.26485 | 0.000489 | 0 |
| chr4 | 1.81E+08 | 1.81E+08 | 384 | 511 | 1.81E+08 | -0.21625 | 0.003456 | 0 |
| chr4 | 1.82E+08 | 1.82E+08 | 451 | 590 | 1.82E+08 | -0.19162 | 0.008262 | 0 |
| chr4 | 1.82E+08 | 1.82E+08 | 412 | 569 | 1.82E+08 | -0.26982 | 0.000393 | 0 |
| chr4 | 1.82E+08 | 1.82E+08 | 377 | 493 | 1.82E+08 | -0.19106 | 0.008421 | 0 |
| chr4 | 1.82E+08 | 1.82E+08 | 412 | 547 | 1.82E+08 | -0.21293 | 0.003906 | 0 |
| chr4 | 1.82E+08 | 1.83E+08 | 432 | 599 | 1.82E+08 | -0.27556 | 0.000305 | 0 |
| chr4 | 1.85E+08 | 1.85E+08 | 646 | 645 | 1.85E+08 | 0.198198 | 0.006185 | 0 |
| chr4 | 1.86E+08 | 1.86E+08 | 609 | 594 | 1.86E+08 | 0.231942 | 0.00172  | 0 |
| chr4 | 1.86E+08 | 1.86E+08 | 617 | 619 | 1.86E+08 | 0.191294 | 0.007878 | 0 |
| chr4 | 1.87E+08 | 1.87E+08 | 657 | 662 | 1.87E+08 | 0.185025 | 0.009756 | 0 |
| chr4 | 1.87E+08 | 1.87E+08 | 684 | 655 | 1.87E+08 | 0.258464 | 0.000562 | 0 |
| chr4 | 1.87E+08 | 1.87E+08 | 443 | 595 | 1.87E+08 | -0.22962 | 0.002082 | 0 |
| chr4 | 1.87E+08 | 1.87E+08 | 237 | 309 | 1.87E+08 | -0.18676 | 0.009722 | 0 |
| chr4 | 1.87E+08 | 1.87E+08 | 198 | 278 | 1.87E+08 | -0.29362 | 0.000133 | 0 |
| chr4 | 1.88E+08 | 1.88E+08 | 295 | 289 | 1.88E+08 | 0.225608 | 0.002214 | 0 |
| chr4 | 1.88E+08 | 1.88E+08 | 221 | 296 | 1.88E+08 | -0.22559 | 0.002432 | 0 |
| chr4 | 1.88E+08 | 1.88E+08 | 214 | 305 | 1.88E+08 | -0.31524 | 4.65E-05 | 0 |
| chr4 | 1.88E+08 | 1.88E+08 | 451 | 599 | 1.88E+08 | -0.21347 | 0.00383  | 0 |
| chr4 | 1.89E+08 | 1.89E+08 | 434 | 580 | 1.89E+08 | -0.22239 | 0.002747 | 0 |
| chr4 | 1.9E+08  | 1.9E+08  | 405 | 546 | 1.9E+08  | -0.23502 | 0.001686 | 0 |
| chr4 | 1.91E+08 | 1.91E+08 | 668 | 890 | 1.91E+08 | -0.21799 | 0.00324  | 0 |
| chr4 | 1.91E+08 | 1.91E+08 | 358 | 476 | 1.91E+08 | -0.21504 | 0.003615 | 0 |
| chr4 | 1.91E+08 | 1.91E+08 | 195 | 267 | 1.91E+08 | -0.2574  | 0.000673 | 0 |
| chr4 | 1.91E+08 | 1.91E+08 | 99  | 139 | 1.91E+08 | -0.29362 | 0.000133 | 0 |
| chr4 | 1.91E+08 | 1.91E+08 | 78  | 104 | 1.91E+08 | -0.21907 | 0.003112 | 0 |
| chr4 | 900001   | 1000000  | 763 | 791 | 950000   | 0.143968 | 0.034529 | 0 |
| chr4 | 1050001  | 1150000  | 620 | 779 | 1100000  | -0.13339 | 0.047059 | 0 |
| chr4 | 1150001  | 1250000  | 775 | 797 | 1200000  | 0.15558  | 0.024735 | 0 |
| chr4 | 1250001  | 1350000  | 680 | 697 | 1300000  | 0.160339 | 0.021457 | 0 |
| chr4 | 1450001  | 1550000  | 575 | 581 | 1500000  | 0.180987 | 0.011164 | 0 |
| chr4 | 1950001  | 2050000  | 713 | 722 | 2.00E+06 | 0.177866 | 0.01237  | 0 |
| chr4 | 2450001  | 2550000  | 630 | 637 | 2500000  | 0.180021 | 0.011525 | 0 |
| chr4 | 3450001  | 3550000  | 755 | 762 | 3500000  | 0.182649 | 0.010564 | 0 |
| chr4 | 3800001  | 3900000  | 683 | 709 | 3850000  | 0.142063 | 0.036407 | 0 |
| chr4 | 4200001  | 4300000  | 529 | 548 | 4250000  | 0.145055 | 0.033494 | 0 |
| chr4 | 4250001  | 4350000  | 609 | 637 | 4300000  | 0.131112 | 0.048884 | 0 |
| chr4 | 4450001  | 4550000  | 615 | 639 | 4500000  | 0.140734 | 0.037766 | 0 |
| chr4 | 4500001  | 4600000  | 607 | 627 | 4550000  | 0.149194 | 0.029784 | 0 |
| chr4 | 6150001  | 6250000  | 733 | 765 | 6200000  | 0.134316 | 0.044921 | 0 |
| chr4 | 6350001  | 6450000  | 728 | 759 | 6400000  | 0.135802 | 0.043175 | 0 |
| chr4 | 6400001  | 6500000  | 729 | 756 | 6450000  | 0.143496 | 0.034987 | 0 |
| chr4 | 6550001  | 6650000  | 773 | 790 | 6600000  | 0.164579 | 0.018855 | 0 |

|      |          |          |     |     |          |          |          |   |
|------|----------|----------|-----|-----|----------|----------|----------|---|
| chr4 | 6600001  | 6700000  | 742 | 753 | 6650000  | 0.174732 | 0.013693 | 0 |
| chr4 | 7600001  | 7700000  | 779 | 808 | 7650000  | 0.143231 | 0.035246 | 0 |
| chr4 | 7750001  | 7850000  | 777 | 791 | 7800000  | 0.1702   | 0.015823 | 0 |
| chr4 | 7850001  | 7950000  | 722 | 732 | 7900000  | 0.176118 | 0.013094 | 0 |
| chr4 | 8000001  | 8100000  | 749 | 759 | 8050000  | 0.176829 | 0.012795 | 0 |
| chr4 | 8150001  | 8250000  | 855 | 863 | 8200000  | 0.182527 | 0.010607 | 0 |
| chr4 | 8450001  | 8550000  | 683 | 707 | 8500000  | 0.146138 | 0.032488 | 0 |
| chr4 | 8500001  | 8600000  | 766 | 789 | 8550000  | 0.153282 | 0.026462 | 0 |
| chr4 | 8600001  | 8700000  | 677 | 687 | 8650000  | 0.174809 | 0.01366  | 0 |
| chr4 | 8700001  | 8800000  | 768 | 798 | 8750000  | 0.140681 | 0.037821 | 0 |
| chr4 | 9100001  | 9200000  | 50  | 52  | 9150000  | 0.13938  | 0.039193 | 0 |
| chr4 | 9300001  | 9400000  | 23  | 29  | 9350000  | -0.13846 | 0.041179 | 0 |
| chr4 | 9550001  | 9650000  | 101 | 129 | 9600000  | -0.15705 | 0.024501 | 0 |
| chr4 | 9650001  | 9750000  | 114 | 144 | 9700000  | -0.14107 | 0.038384 | 0 |
| chr4 | 9750001  | 9850000  | 338 | 432 | 9800000  | -0.15805 | 0.023801 | 0 |
| chr4 | 9850001  | 9950000  | 499 | 631 | 9900000  | -0.14264 | 0.036787 | 0 |
| chr4 | 9900001  | 10000000 | 472 | 603 | 9950000  | -0.15741 | 0.024248 | 0 |
| chr4 | 9950001  | 10050000 | 485 | 609 | 1.00E+07 | -0.13249 | 0.048169 | 0 |
| chr4 | 10050001 | 10150000 | 646 | 670 | 10100000 | 0.143336 | 0.035143 | 0 |
| chr4 | 10600001 | 10700000 | 444 | 559 | 10650000 | -0.13633 | 0.043575 | 0 |
| chr4 | 10700001 | 10800000 | 417 | 532 | 10750000 | -0.15542 | 0.025694 | 0 |
| chr4 | 11000001 | 11100000 | 377 | 475 | 11050000 | -0.1374  | 0.042353 | 0 |
| chr4 | 11050001 | 11150000 | 350 | 445 | 11100000 | -0.15049 | 0.029584 | 0 |
| chr4 | 11250001 | 11350000 | 432 | 552 | 11300000 | -0.15767 | 0.024061 | 0 |
| chr4 | 11700001 | 11800000 | 393 | 495 | 11750000 | -0.13694 | 0.042877 | 0 |
| chr4 | 11850001 | 11950000 | 403 | 510 | 11900000 | -0.14375 | 0.035682 | 0 |
| chr4 | 12150001 | 12250000 | 397 | 515 | 12200000 | -0.17947 | 0.012329 | 0 |
| chr4 | 12250001 | 12350000 | 381 | 483 | 12300000 | -0.14627 | 0.033293 | 0 |
| chr4 | 12450001 | 12550000 | 375 | 483 | 12500000 | -0.16917 | 0.017044 | 0 |
| chr4 | 12800001 | 12900000 | 530 | 542 | 12850000 | 0.163663 | 0.019393 | 0 |
| chr4 | 13600001 | 13700000 | 614 | 641 | 13650000 | 0.133877 | 0.045448 | 0 |
| chr4 | 13950001 | 14050000 | 472 | 613 | 1.40E+07 | -0.18114 | 0.011684 | 0 |
| chr4 | 14950001 | 15050000 | 580 | 598 | 1.50E+07 | 0.15187  | 0.027572 | 0 |
| chr4 | 15000001 | 15100000 | 589 | 614 | 15050000 | 0.135992 | 0.042955 | 0 |
| chr4 | 15300001 | 15400000 | 597 | 623 | 15350000 | 0.134462 | 0.044748 | 0 |
| chr4 | 15400001 | 15500000 | 545 | 705 | 15450000 | -0.1754  | 0.014034 | 0 |
| chr4 | 16700001 | 16800000 | 448 | 562 | 16750000 | -0.13111 | 0.049924 | 0 |
| chr4 | 17400001 | 17500000 | 460 | 580 | 17450000 | -0.13846 | 0.041179 | 0 |
| chr4 | 17550001 | 17650000 | 563 | 575 | 17600000 | 0.165536 | 0.018306 | 0 |
| chr4 | 18700001 | 18800000 | 446 | 567 | 18750000 | -0.15034 | 0.029706 | 0 |
| chr4 | 18750001 | 18850000 | 436 | 553 | 18800000 | -0.14699 | 0.032634 | 0 |
| chr4 | 18800001 | 18900000 | 414 | 538 | 18850000 | -0.18201 | 0.011357 | 0 |
| chr4 | 18950001 | 19050000 | 447 | 574 | 1.90E+07 | -0.16481 | 0.019463 | 0 |
| chr4 | 19050001 | 19150000 | 357 | 464 | 19100000 | -0.18224 | 0.011275 | 0 |
| chr4 | 19100001 | 19200000 | 411 | 517 | 19150000 | -0.13506 | 0.045048 | 0 |
| chr4 | 19500001 | 19600000 | 390 | 500 | 19550000 | -0.16249 | 0.020869 | 0 |
| chr4 | 20100001 | 20200000 | 373 | 481 | 20150000 | -0.1709  | 0.016158 | 0 |



|      |          |          |     |     |          |          |          |   |
|------|----------|----------|-----|-----|----------|----------|----------|---|
| chr4 | 21050001 | 21150000 | 375 | 484 | 21100000 | -0.17215 | 0.01554  | 0 |
| chr4 | 21100001 | 21200000 | 366 | 470 | 21150000 | -0.16485 | 0.019439 | 0 |
| chr4 | 21300001 | 21400000 | 435 | 550 | 21350000 | -0.14245 | 0.036972 | 0 |
| chr4 | 22100001 | 22200000 | 354 | 453 | 22150000 | -0.1598  | 0.022605 | 0 |
| chr4 | 23150001 | 23250000 | 486 | 614 | 23200000 | -0.14132 | 0.038128 | 0 |
| chr4 | 24250001 | 24350000 | 620 | 642 | 24300000 | 0.145658 | 0.032931 | 0 |
| chr4 | 24600001 | 24700000 | 604 | 625 | 24650000 | 0.146655 | 0.032017 | 0 |
| chr4 | 24850001 | 24950000 | 480 | 613 | 24900000 | -0.15689 | 0.024618 | 0 |
| chr4 | 24900001 | 25000000 | 487 | 622 | 24950000 | -0.15703 | 0.024517 | 0 |
| chr4 | 25450001 | 25550000 | 445 | 566 | 25500000 | -0.15103 | 0.02913  | 0 |
| chr4 | 26300001 | 26400000 | 546 | 561 | 26350000 | 0.156863 | 0.023812 | 0 |
| chr4 | 26600001 | 26700000 | 382 | 482 | 26650000 | -0.1395  | 0.040047 | 0 |
| chr4 | 26700001 | 26800000 | 476 | 613 | 26750000 | -0.16896 | 0.017153 | 0 |
| chr4 | 27400001 | 27500000 | 432 | 549 | 27450000 | -0.14981 | 0.030154 | 0 |
| chr4 | 27450001 | 27550000 | 433 | 546 | 27500000 | -0.13857 | 0.041052 | 0 |
| chr4 | 27900001 | 28000000 | 398 | 509 | 27950000 | -0.15893 | 0.023188 | 0 |
| chr4 | 27950001 | 28050000 | 388 | 498 | 2.80E+07 | -0.16413 | 0.01987  | 0 |
| chr4 | 28000001 | 28100000 | 372 | 477 | 28050000 | -0.16272 | 0.020724 | 0 |
| chr4 | 28200001 | 28300000 | 377 | 477 | 28250000 | -0.14346 | 0.035969 | 0 |
| chr4 | 28250001 | 28350000 | 357 | 463 | 28300000 | -0.17913 | 0.012466 | 0 |
| chr4 | 28350001 | 28450000 | 394 | 498 | 28400000 | -0.14199 | 0.037444 | 0 |
| chr4 | 28400001 | 28500000 | 378 | 479 | 28450000 | -0.14568 | 0.033844 | 0 |
| chr4 | 28550001 | 28650000 | 404 | 516 | 28600000 | -0.15705 | 0.024501 | 0 |
| chr4 | 28600001 | 28700000 | 424 | 537 | 28650000 | -0.14489 | 0.034581 | 0 |
| chr4 | 29350001 | 29450000 | 407 | 526 | 29400000 | -0.17407 | 0.014636 | 0 |
| chr4 | 29750001 | 29850000 | 401 | 513 | 29800000 | -0.15939 | 0.022877 | 0 |
| chr4 | 30200001 | 30300000 | 414 | 538 | 30250000 | -0.18201 | 0.011357 | 0 |
| chr4 | 30350001 | 30450000 | 429 | 540 | 30400000 | -0.13602 | 0.04393  | 0 |
| chr4 | 30400001 | 30500000 | 443 | 567 | 30450000 | -0.16008 | 0.022419 | 0 |
| chr4 | 30500001 | 30600000 | 454 | 572 | 30550000 | -0.13736 | 0.042398 | 0 |
| chr4 | 31300001 | 31400000 | 441 | 573 | 31350000 | -0.18179 | 0.011438 | 0 |
| chr4 | 31350001 | 31450000 | 391 | 506 | 31400000 | -0.17601 | 0.013769 | 0 |
| chr4 | 31550001 | 31650000 | 439 | 558 | 31600000 | -0.15008 | 0.029925 | 0 |
| chr4 | 31650001 | 31750000 | 421 | 529 | 31700000 | -0.13348 | 0.046946 | 0 |
| chr4 | 31700001 | 31800000 | 430 | 542 | 31750000 | -0.13799 | 0.04169  | 0 |
| chr4 | 31800001 | 31900000 | 342 | 436 | 31850000 | -0.15437 | 0.026482 | 0 |
| chr4 | 31850001 | 31950000 | 438 | 562 | 31900000 | -0.16368 | 0.020141 | 0 |
| chr4 | 31900001 | 32000000 | 431 | 545 | 31950000 | -0.14261 | 0.036819 | 0 |
| chr4 | 32400001 | 32500000 | 401 | 514 | 32450000 | -0.1622  | 0.021049 | 0 |
| chr4 | 32500001 | 32600000 | 429 | 556 | 32550000 | -0.17814 | 0.012864 | 0 |
| chr4 | 32600001 | 32700000 | 423 | 535 | 32650000 | -0.14292 | 0.036507 | 0 |
| chr4 | 32700001 | 32800000 | 422 | 546 | 32750000 | -0.17569 | 0.013906 | 0 |
| chr4 | 33000001 | 33100000 | 415 | 532 | 33050000 | -0.16235 | 0.020955 | 0 |
| chr4 | 33200001 | 33300000 | 420 | 546 | 33250000 | -0.18255 | 0.011161 | 0 |
| chr4 | 33450001 | 33550000 | 464 | 588 | 33500000 | -0.14573 | 0.033795 | 0 |
| chr4 | 33700001 | 33800000 | 450 | 585 | 33750000 | -0.18255 | 0.011161 | 0 |
| chr4 | 33900001 | 34000000 | 420 | 530 | 33950000 | -0.13964 | 0.039894 | 0 |

|      |          |          |     |     |          |          |          |   |
|------|----------|----------|-----|-----|----------|----------|----------|---|
| chr4 | 34450001 | 34550000 | 424 | 534 | 34500000 | -0.13681 | 0.043018 | 0 |
| chr4 | 34500001 | 34600000 | 432 | 561 | 34550000 | -0.18101 | 0.011734 | 0 |
| chr4 | 34750001 | 34850000 | 321 | 403 | 34800000 | -0.13224 | 0.048483 | 0 |
| chr4 | 34800001 | 34900000 | 356 | 460 | 34850000 | -0.17379 | 0.014764 | 0 |
| chr4 | 34900001 | 35000000 | 423 | 549 | 34950000 | -0.18019 | 0.012049 | 0 |
| chr4 | 34950001 | 35050000 | 411 | 531 | 3.50E+07 | -0.17361 | 0.014849 | 0 |
| chr4 | 35050001 | 35150000 | 408 | 524 | 35100000 | -0.16503 | 0.019334 | 0 |
| chr4 | 35100001 | 35200000 | 423 | 551 | 35150000 | -0.18543 | 0.010156 | 0 |
| chr4 | 36800001 | 36900000 | 403 | 509 | 36850000 | -0.14092 | 0.038539 | 0 |
| chr4 | 37000001 | 37100000 | 439 | 564 | 37050000 | -0.16551 | 0.019057 | 0 |
| chr4 | 37200001 | 37300000 | 464 | 586 | 37250000 | -0.14081 | 0.038654 | 0 |
| chr4 | 37250001 | 37350000 | 461 | 593 | 37300000 | -0.1673  | 0.018047 | 0 |
| chr4 | 37450001 | 37550000 | 464 | 586 | 37500000 | -0.14081 | 0.038654 | 0 |
| chr4 | 37500001 | 37600000 | 443 | 572 | 37550000 | -0.17275 | 0.015256 | 0 |
| chr4 | 37800001 | 37900000 | 601 | 608 | 37850000 | 0.179257 | 0.011819 | 0 |
| chr4 | 38400001 | 38500000 | 461 | 586 | 38450000 | -0.15017 | 0.02985  | 0 |
| chr4 | 38450001 | 38550000 | 501 | 652 | 38500000 | -0.1841  | 0.010611 | 0 |
| chr4 | 38750001 | 38850000 | 551 | 696 | 38800000 | -0.14107 | 0.038384 | 0 |
| chr4 | 39050001 | 39150000 | 563 | 577 | 39100000 | 0.160527 | 0.021336 | 0 |
| chr4 | 39100001 | 39200000 | 557 | 578 | 39150000 | 0.142571 | 0.035898 | 0 |
| chr4 | 39300001 | 39400000 | 570 | 578 | 39350000 | 0.175855 | 0.013205 | 0 |
| chr4 | 39550001 | 39650000 | 508 | 529 | 39600000 | 0.137524 | 0.041219 | 0 |
| chr4 | 40050001 | 40150000 | 474 | 606 | 40100000 | -0.15847 | 0.023508 | 0 |
| chr4 | 40400001 | 40500000 | 496 | 629 | 40450000 | -0.14676 | 0.032845 | 0 |
| chr4 | 40600001 | 40700000 | 583 | 589 | 40650000 | 0.181191 | 0.011088 | 0 |
| chr4 | 41150001 | 41250000 | 648 | 675 | 41200000 | 0.137069 | 0.041728 | 0 |
| chr4 | 41200001 | 41300000 | 611 | 631 | 41250000 | 0.149495 | 0.029528 | 0 |
| chr4 | 41550001 | 41650000 | 747 | 764 | 41600000 | 0.163499 | 0.019491 | 0 |
| chr4 | 41900001 | 42000000 | 526 | 535 | 41950000 | 0.171487 | 0.015191 | 0 |
| chr4 | 42150001 | 42250000 | 576 | 748 | 42200000 | -0.18101 | 0.011734 | 0 |
| chr4 | 42200001 | 42300000 | 434 | 552 | 42250000 | -0.15101 | 0.029149 | 0 |
| chr4 | 42700001 | 42800000 | 433 | 553 | 42750000 | -0.15695 | 0.024575 | 0 |
| chr4 | 42800001 | 42900000 | 466 | 592 | 42850000 | -0.1493  | 0.030588 | 0 |
| chr4 | 43050001 | 43150000 | 374 | 481 | 43100000 | -0.16704 | 0.018195 | 0 |
| chr4 | 43550001 | 43650000 | 371 | 469 | 43600000 | -0.14221 | 0.037222 | 0 |
| chr4 | 44100001 | 44200000 | 393 | 505 | 44150000 | -0.16579 | 0.018896 | 0 |
| chr4 | 44350001 | 44450000 | 437 | 549 | 44400000 | -0.13321 | 0.047283 | 0 |
| chr4 | 44400001 | 44500000 | 426 | 538 | 44450000 | -0.14079 | 0.038678 | 0 |
| chr4 | 44850001 | 44950000 | 413 | 531 | 44900000 | -0.16661 | 0.018434 | 0 |
| chr4 | 45100001 | 45200000 | 413 | 522 | 45150000 | -0.14194 | 0.037487 | 0 |
| chr4 | 45500001 | 45600000 | 433 | 546 | 45550000 | -0.13857 | 0.041052 | 0 |
| chr4 | 45800001 | 45900000 | 386 | 495 | 45850000 | -0.16286 | 0.020637 | 0 |
| chr4 | 46050001 | 46150000 | 421 | 547 | 46100000 | -0.18176 | 0.011452 | 0 |
| chr4 | 46450001 | 46550000 | 423 | 536 | 46500000 | -0.14561 | 0.033904 | 0 |
| chr4 | 49150001 | 49250000 | 412 | 518 | 49200000 | -0.13434 | 0.045904 | 0 |
| chr4 | 49550001 | 49650000 | 286 | 368 | 49600000 | -0.16773 | 0.017815 | 0 |
| chr4 | 49600001 | 49700000 | 544 | 689 | 49650000 | -0.14493 | 0.034544 | 0 |

|      |          |          |     |     |          |          |          |   |
|------|----------|----------|-----|-----|----------|----------|----------|---|
| chr4 | 53400001 | 53500000 | 473 | 596 | 53450000 | -0.13751 | 0.04223  | 0 |
| chr4 | 53550001 | 53650000 | 475 | 610 | 53600000 | -0.16492 | 0.019401 | 0 |
| chr4 | 53600001 | 53700000 | 406 | 517 | 53650000 | -0.15272 | 0.027763 | 0 |
| chr4 | 53700001 | 53800000 | 496 | 633 | 53750000 | -0.1559  | 0.025334 | 0 |
| chr4 | 54700001 | 54800000 | 452 | 579 | 54750000 | -0.16128 | 0.021637 | 0 |
| chr4 | 54850001 | 54950000 | 535 | 557 | 54900000 | 0.137825 | 0.040885 | 0 |
| chr4 | 55050001 | 55150000 | 450 | 572 | 55100000 | -0.15013 | 0.029887 | 0 |
| chr4 | 55100001 | 55200000 | 428 | 547 | 55150000 | -0.15797 | 0.023855 | 0 |
| chr4 | 55200001 | 55300000 | 514 | 665 | 55250000 | -0.17562 | 0.013937 | 0 |
| chr4 | 55750001 | 55850000 | 509 | 639 | 55800000 | -0.13219 | 0.048554 | 0 |
| chr4 | 56150001 | 56250000 | 575 | 598 | 56200000 | 0.13938  | 0.039193 | 0 |
| chr4 | 56500001 | 56600000 | 460 | 583 | 56550000 | -0.1459  | 0.033636 | 0 |
| chr4 | 57200001 | 57300000 | 517 | 535 | 57250000 | 0.146588 | 0.032077 | 0 |
| chr4 | 57450001 | 57550000 | 512 | 653 | 57500000 | -0.15498 | 0.026022 | 0 |
| chr4 | 57750001 | 57850000 | 530 | 539 | 57800000 | 0.17167  | 0.015103 | 0 |
| chr4 | 57850001 | 57950000 | 674 | 680 | 57900000 | 0.183177 | 0.01038  | 0 |
| chr4 | 58500001 | 58600000 | 405 | 514 | 58550000 | -0.14788 | 0.03183  | 0 |
| chr4 | 58700001 | 58800000 | 373 | 473 | 58750000 | -0.1467  | 0.032896 | 0 |
| chr4 | 59350001 | 59450000 | 380 | 482 | 59400000 | -0.14707 | 0.03256  | 0 |
| chr4 | 59600001 | 59700000 | 372 | 471 | 59650000 | -0.14446 | 0.034996 | 0 |
| chr4 | 59850001 | 59950000 | 382 | 486 | 59900000 | -0.15142 | 0.028812 | 0 |
| chr4 | 60000001 | 60100000 | 353 | 451 | 60050000 | -0.1575  | 0.024186 | 0 |
| chr4 | 60150001 | 60250000 | 371 | 472 | 60200000 | -0.1514  | 0.028825 | 0 |
| chr4 | 60200001 | 60300000 | 358 | 455 | 60250000 | -0.14994 | 0.030041 | 0 |
| chr4 | 60300001 | 60400000 | 361 | 468 | 60350000 | -0.17855 | 0.0127   | 0 |
| chr4 | 60650001 | 60750000 | 384 | 486 | 60700000 | -0.14389 | 0.035552 | 0 |
| chr4 | 60800001 | 60900000 | 377 | 485 | 60850000 | -0.16746 | 0.017962 | 0 |
| chr4 | 60850001 | 60950000 | 369 | 463 | 60900000 | -0.13143 | 0.049515 | 0 |
| chr4 | 61350001 | 61450000 | 399 | 516 | 61400000 | -0.17502 | 0.014205 | 0 |
| chr4 | 62250001 | 62350000 | 385 | 497 | 62300000 | -0.17242 | 0.01541  | 0 |
| chr4 | 62500001 | 62600000 | 369 | 469 | 62550000 | -0.15    | 0.02999  | 0 |
| chr4 | 62550001 | 62650000 | 305 | 391 | 62600000 | -0.1624  | 0.020928 | 0 |
| chr4 | 62650001 | 62750000 | 378 | 478 | 62700000 | -0.14266 | 0.036763 | 0 |
| chr4 | 62850001 | 62950000 | 413 | 431 | 62900000 | 0.134417 | 0.044801 | 0 |
| chr4 | 63350001 | 63450000 | 367 | 461 | 63400000 | -0.13302 | 0.047512 | 0 |
| chr4 | 63600001 | 63700000 | 357 | 449 | 63650000 | -0.13483 | 0.045326 | 0 |
| chr4 | 63650001 | 63750000 | 375 | 471 | 63700000 | -0.13287 | 0.047698 | 0 |
| chr4 | 63700001 | 63800000 | 403 | 517 | 63750000 | -0.16342 | 0.020295 | 0 |
| chr4 | 63850001 | 63950000 | 359 | 451 | 63900000 | -0.13318 | 0.047319 | 0 |
| chr4 | 64100001 | 64200000 | 339 | 435 | 64150000 | -0.16377 | 0.020086 | 0 |
| chr4 | 64150001 | 64250000 | 348 | 450 | 64200000 | -0.17487 | 0.01427  | 0 |
| chr4 | 64250001 | 64350000 | 372 | 476 | 64300000 | -0.1597  | 0.022674 | 0 |
| chr4 | 64400001 | 64500000 | 343 | 446 | 64450000 | -0.18287 | 0.011044 | 0 |
| chr4 | 64450001 | 64550000 | 384 | 490 | 64500000 | -0.15571 | 0.025474 | 0 |
| chr4 | 64600001 | 64700000 | 381 | 493 | 64650000 | -0.17583 | 0.013845 | 0 |
| chr4 | 64750001 | 64850000 | 374 | 477 | 64800000 | -0.15499 | 0.026014 | 0 |
| chr4 | 64850001 | 64950000 | 360 | 453 | 64900000 | -0.13555 | 0.044474 | 0 |

|      |          |          |     |     |          |          |          |   |
|------|----------|----------|-----|-----|----------|----------|----------|---|
| chr4 | 64900001 | 65000000 | 328 | 427 | 64950000 | -0.18458 | 0.010445 | 0 |
| chr4 | 65150001 | 65250000 | 379 | 486 | 65200000 | -0.1628  | 0.02068  | 0 |
| chr4 | 65400001 | 65500000 | 389 | 492 | 65450000 | -0.14293 | 0.0365   | 0 |
| chr4 | 65550001 | 65650000 | 419 | 535 | 65600000 | -0.15663 | 0.024808 | 0 |
| chr4 | 65600001 | 65700000 | 410 | 515 | 65650000 | -0.13299 | 0.04756  | 0 |
| chr4 | 65900001 | 66000000 | 406 | 528 | 65950000 | -0.1831  | 0.010964 | 0 |
| chr4 | 66000001 | 66100000 | 385 | 489 | 66050000 | -0.14901 | 0.030839 | 0 |
| chr4 | 66550001 | 66650000 | 385 | 486 | 66600000 | -0.14013 | 0.039367 | 0 |
| chr4 | 66750001 | 66850000 | 414 | 538 | 66800000 | -0.18201 | 0.011357 | 0 |
| chr4 | 66850001 | 66950000 | 421 | 536 | 66900000 | -0.15245 | 0.02798  | 0 |
| chr4 | 66900001 | 67000000 | 411 | 525 | 66950000 | -0.15722 | 0.024385 | 0 |
| chr4 | 67000001 | 67100000 | 439 | 552 | 67050000 | -0.13448 | 0.045737 | 0 |
| chr4 | 67600001 | 67700000 | 386 | 498 | 67650000 | -0.17158 | 0.015819 | 0 |
| chr4 | 68350001 | 68450000 | 554 | 569 | 68400000 | 0.15742  | 0.02342  | 0 |
| chr4 | 68700001 | 68800000 | 451 | 586 | 68750000 | -0.18181 | 0.011432 | 0 |
| chr4 | 68950001 | 69050000 | 426 | 549 | 6.90E+07 | -0.16999 | 0.016619 | 0 |
| chr4 | 69000001 | 69100000 | 406 | 515 | 69050000 | -0.14713 | 0.032506 | 0 |
| chr4 | 69500001 | 69600000 | 321 | 335 | 69550000 | 0.134375 | 0.044851 | 0 |
| chr4 | 69850001 | 69950000 | 300 | 378 | 69900000 | -0.13746 | 0.042285 | 0 |
| chr4 | 71250001 | 71350000 | 400 | 509 | 71300000 | -0.1517  | 0.028582 | 0 |
| chr4 | 71950001 | 72050000 | 352 | 443 | 7.20E+07 | -0.13577 | 0.044221 | 0 |
| chr4 | 72600001 | 72700000 | 398 | 511 | 72650000 | -0.16459 | 0.019594 | 0 |
| chr4 | 73200001 | 73300000 | 456 | 586 | 73250000 | -0.1659  | 0.018832 | 0 |
| chr4 | 73350001 | 73450000 | 355 | 459 | 73400000 | -0.17471 | 0.014344 | 0 |
| chr4 | 73400001 | 73500000 | 375 | 475 | 73450000 | -0.14507 | 0.034411 | 0 |
| chr4 | 73750001 | 73850000 | 402 | 505 | 73800000 | -0.13312 | 0.047388 | 0 |
| chr4 | 75050001 | 75150000 | 500 | 640 | 75100000 | -0.16018 | 0.022351 | 0 |
| chr4 | 75950001 | 76050000 | 445 | 575 | 7.60E+07 | -0.17379 | 0.014764 | 0 |
| chr4 | 76000001 | 76100000 | 380 | 488 | 76050000 | -0.16492 | 0.019401 | 0 |
| chr4 | 76150001 | 76250000 | 342 | 445 | 76200000 | -0.18385 | 0.010699 | 0 |
| chr4 | 76250001 | 76350000 | 386 | 493 | 76300000 | -0.15702 | 0.024522 | 0 |
| chr4 | 76550001 | 76650000 | 592 | 613 | 76600000 | 0.145673 | 0.032917 | 0 |
| chr4 | 76650001 | 76750000 | 515 | 525 | 76700000 | 0.168218 | 0.01684  | 0 |
| chr4 | 76850001 | 76950000 | 555 | 576 | 76900000 | 0.142382 | 0.036087 | 0 |
| chr4 | 77400001 | 77500000 | 546 | 690 | 77450000 | -0.14173 | 0.037704 | 0 |
| chr4 | 77900001 | 78000000 | 622 | 647 | 77950000 | 0.139112 | 0.03948  | 0 |
| chr4 | 79000001 | 79100000 | 357 | 452 | 79050000 | -0.14444 | 0.035021 | 0 |
| chr4 | 79300001 | 79400000 | 502 | 524 | 79350000 | 0.134084 | 0.0452   | 0 |
| chr4 | 79350001 | 79450000 | 480 | 491 | 79400000 | 0.163274 | 0.019625 | 0 |
| chr4 | 79400001 | 79500000 | 491 | 507 | 79450000 | 0.1497   | 0.029355 | 0 |
| chr4 | 80350001 | 80450000 | 425 | 537 | 80400000 | -0.1415  | 0.037946 | 0 |
| chr4 | 80400001 | 80500000 | 400 | 515 | 80450000 | -0.16861 | 0.01734  | 0 |
| chr4 | 80450001 | 80550000 | 413 | 537 | 80500000 | -0.18282 | 0.011064 | 0 |
| chr4 | 80550001 | 80650000 | 384 | 498 | 80600000 | -0.17908 | 0.012486 | 0 |
| chr4 | 80900001 | 81000000 | 418 | 532 | 80950000 | -0.15196 | 0.028373 | 0 |
| chr4 | 81450001 | 81550000 | 426 | 535 | 81500000 | -0.13272 | 0.047885 | 0 |
| chr4 | 81550001 | 81650000 | 349 | 449 | 81600000 | -0.16753 | 0.017925 | 0 |

|      |          |          |     |     |          |          |          |   |
|------|----------|----------|-----|-----|----------|----------|----------|---|
| chr4 | 81900001 | 82000000 | 429 | 545 | 81950000 | -0.14932 | 0.030578 | 0 |
| chr4 | 81950001 | 82050000 | 416 | 522 | 8.20E+07 | -0.1315  | 0.049419 | 0 |
| chr4 | 82100001 | 82200000 | 390 | 490 | 82150000 | -0.13334 | 0.047118 | 0 |
| chr4 | 82300001 | 82400000 | 429 | 555 | 82350000 | -0.17555 | 0.013971 | 0 |
| chr4 | 82550001 | 82650000 | 407 | 511 | 82600000 | -0.13233 | 0.048373 | 0 |
| chr4 | 82900001 | 83000000 | 483 | 616 | 82950000 | -0.15494 | 0.026046 | 0 |
| chr4 | 83250001 | 83350000 | 572 | 577 | 83300000 | 0.183407 | 0.0103   | 0 |
| chr4 | 83500001 | 83600000 | 552 | 558 | 83550000 | 0.180366 | 0.011395 | 0 |
| chr4 | 84700001 | 84800000 | 512 | 651 | 84750000 | -0.15055 | 0.029531 | 0 |
| chr4 | 84850001 | 84950000 | 417 | 540 | 84900000 | -0.17695 | 0.013364 | 0 |
| chr4 | 84900001 | 85000000 | 457 | 577 | 84950000 | -0.14041 | 0.039072 | 0 |
| chr4 | 85050001 | 85150000 | 470 | 590 | 85100000 | -0.13209 | 0.048675 | 0 |
| chr4 | 85150001 | 85250000 | 401 | 514 | 85200000 | -0.1622  | 0.021049 | 0 |
| chr4 | 85600001 | 85700000 | 453 | 579 | 85650000 | -0.15809 | 0.02377  | 0 |
| chr4 | 86100001 | 86200000 | 399 | 503 | 86150000 | -0.13821 | 0.041453 | 0 |
| chr4 | 86350001 | 86450000 | 485 | 622 | 86400000 | -0.16297 | 0.020574 | 0 |
| chr4 | 86500001 | 86600000 | 423 | 535 | 86550000 | -0.14292 | 0.036507 | 0 |
| chr4 | 86550001 | 86650000 | 469 | 597 | 86600000 | -0.15218 | 0.028196 | 0 |
| chr4 | 87150001 | 87250000 | 476 | 610 | 87200000 | -0.16188 | 0.021249 | 0 |
| chr4 | 87400001 | 87500000 | 500 | 630 | 87450000 | -0.13746 | 0.042285 | 0 |
| chr4 | 87700001 | 87800000 | 427 | 550 | 87750000 | -0.16923 | 0.017011 | 0 |
| chr4 | 87850001 | 87950000 | 573 | 581 | 87900000 | 0.17596  | 0.013161 | 0 |
| chr4 | 88250001 | 88350000 | 482 | 492 | 88300000 | 0.166338 | 0.017857 | 0 |
| chr4 | 88400001 | 88500000 | 468 | 598 | 88450000 | -0.15767 | 0.024061 | 0 |
| chr4 | 89100001 | 89200000 | 474 | 597 | 89150000 | -0.13688 | 0.04294  | 0 |
| chr4 | 89150001 | 89250000 | 495 | 644 | 89200000 | -0.18367 | 0.010761 | 0 |
| chr4 | 89750001 | 89850000 | 529 | 543 | 89800000 | 0.158279 | 0.022828 | 0 |
| chr4 | 90500001 | 90600000 | 458 | 595 | 90550000 | -0.18158 | 0.011518 | 0 |
| chr4 | 90600001 | 90700000 | 551 | 710 | 90650000 | -0.1698  | 0.016715 | 0 |
| chr4 | 91100001 | 91200000 | 494 | 506 | 91150000 | 0.161337 | 0.020819 | 0 |
| chr4 | 91250001 | 91350000 | 412 | 526 | 91300000 | -0.15646 | 0.024931 | 0 |
| chr4 | 91300001 | 91400000 | 382 | 493 | 91350000 | -0.17205 | 0.01559  | 0 |
| chr4 | 91550001 | 91650000 | 337 | 434 | 91600000 | -0.16898 | 0.017142 | 0 |
| chr4 | 92450001 | 92550000 | 395 | 506 | 92500000 | -0.16132 | 0.021608 | 0 |
| chr4 | 92550001 | 92650000 | 372 | 482 | 92600000 | -0.17777 | 0.01302  | 0 |
| chr4 | 92650001 | 92750000 | 385 | 501 | 92700000 | -0.18399 | 0.010649 | 0 |
| chr4 | 92850001 | 92950000 | 374 | 478 | 92900000 | -0.15801 | 0.023826 | 0 |
| chr4 | 93100001 | 93200000 | 317 | 410 | 93150000 | -0.17518 | 0.014134 | 0 |
| chr4 | 93200001 | 93300000 | 425 | 550 | 93250000 | -0.17601 | 0.013769 | 0 |
| chr4 | 93400001 | 93500000 | 378 | 483 | 93450000 | -0.15767 | 0.024061 | 0 |
| chr4 | 93600001 | 93700000 | 402 | 508 | 93650000 | -0.14167 | 0.037767 | 0 |
| chr4 | 93650001 | 93750000 | 424 | 541 | 93700000 | -0.1556  | 0.025556 | 0 |
| chr4 | 93900001 | 94000000 | 407 | 526 | 93950000 | -0.17407 | 0.014636 | 0 |
| chr4 | 94150001 | 94250000 | 408 | 518 | 94200000 | -0.14842 | 0.031356 | 0 |
| chr4 | 94200001 | 94300000 | 409 | 529 | 94250000 | -0.1752  | 0.014123 | 0 |
| chr4 | 94400001 | 94500000 | 422 | 536 | 94450000 | -0.14903 | 0.030827 | 0 |
| chr4 | 94600001 | 94700000 | 431 | 551 | 94650000 | -0.1584  | 0.023554 | 0 |

|      |          |          |     |     |          |          |          |   |
|------|----------|----------|-----|-----|----------|----------|----------|---|
| chr4 | 94700001 | 94800000 | 520 | 660 | 94750000 | -0.14799 | 0.031734 | 0 |
| chr4 | 94900001 | 95000000 | 454 | 574 | 94950000 | -0.1424  | 0.03703  | 0 |
| chr4 | 95600001 | 95700000 | 507 | 641 | 95650000 | -0.14238 | 0.03705  | 0 |
| chr4 | 95700001 | 95800000 | 452 | 585 | 95750000 | -0.17615 | 0.013706 | 0 |
| chr4 | 95750001 | 95850000 | 453 | 574 | 95800000 | -0.14558 | 0.033937 | 0 |
| chr4 | 95800001 | 95900000 | 444 | 570 | 95850000 | -0.16444 | 0.019684 | 0 |
| chr4 | 95950001 | 96050000 | 450 | 572 | 9.60E+07 | -0.15013 | 0.029887 | 0 |
| chr4 | 96000001 | 96100000 | 398 | 516 | 96050000 | -0.17864 | 0.012662 | 0 |
| chr4 | 96050001 | 96150000 | 410 | 527 | 96100000 | -0.16622 | 0.018654 | 0 |
| chr4 | 96300001 | 96400000 | 436 | 563 | 96350000 | -0.17284 | 0.015209 | 0 |
| chr4 | 96550001 | 96650000 | 402 | 518 | 96600000 | -0.16979 | 0.01672  | 0 |
| chr4 | 96950001 | 97050000 | 422 | 532 | 9.70E+07 | -0.13822 | 0.041438 | 0 |
| chr4 | 97150001 | 97250000 | 415 | 526 | 97200000 | -0.14599 | 0.033553 | 0 |
| chr4 | 97300001 | 97400000 | 386 | 492 | 97350000 | -0.15409 | 0.026692 | 0 |
| chr4 | 97350001 | 97450000 | 408 | 520 | 97400000 | -0.15398 | 0.02678  | 0 |
| chr4 | 97750001 | 97850000 | 393 | 510 | 97800000 | -0.18    | 0.012119 | 0 |
| chr4 | 97850001 | 97950000 | 407 | 518 | 97900000 | -0.15196 | 0.028373 | 0 |
| chr4 | 98100001 | 98200000 | 387 | 492 | 98150000 | -0.15036 | 0.029689 | 0 |
| chr4 | 98150001 | 98250000 | 353 | 445 | 98200000 | -0.13817 | 0.041489 | 0 |
| chr4 | 98400001 | 98500000 | 342 | 445 | 98450000 | -0.18385 | 0.010699 | 0 |
| chr4 | 98550001 | 98650000 | 348 | 451 | 98600000 | -0.17808 | 0.012892 | 0 |
| chr4 | 98850001 | 98950000 | 324 | 409 | 98900000 | -0.14014 | 0.039357 | 0 |
| chr4 | 99050001 | 99150000 | 446 | 571 | 99100000 | -0.16048 | 0.022152 | 0 |
| chr4 | 99150001 | 99250000 | 460 | 475 | 99200000 | 0.149669 | 0.029381 | 0 |
| chr4 | 99500001 | 99600000 | 468 | 589 | 99550000 | -0.1358  | 0.044188 | 0 |
| chr4 | 99750001 | 99850000 | 419 | 540 | 99800000 | -0.17005 | 0.01659  | 0 |
| chr4 | 99850001 | 99950000 | 552 | 561 | 99900000 | 0.172631 | 0.014648 | 0 |
| chr4 | 99900001 | 1E+08    | 549 | 554 | 99950000 | 0.182883 | 0.010482 | 0 |
| chr4 | 1E+08    | 1E+08    | 321 | 404 | 1E+08    | -0.13582 | 0.044162 | 0 |
| chr4 | 1E+08    | 1E+08    | 375 | 483 | 1E+08    | -0.16917 | 0.017044 | 0 |
| chr4 | 1E+08    | 1E+08    | 451 | 567 | 1E+08    | -0.13426 | 0.046008 | 0 |
| chr4 | 1E+08    | 1.01E+08 | 458 | 578 | 1E+08    | -0.13976 | 0.039767 | 0 |
| chr4 | 1.01E+08 | 1.01E+08 | 399 | 519 | 1.01E+08 | -0.18338 | 0.010862 | 0 |
| chr4 | 1.01E+08 | 1.01E+08 | 447 | 575 | 1.01E+08 | -0.16732 | 0.018035 | 0 |
| chr4 | 1.02E+08 | 1.02E+08 | 438 | 560 | 1.02E+08 | -0.15853 | 0.023463 | 0 |
| chr4 | 1.02E+08 | 1.02E+08 | 493 | 628 | 1.02E+08 | -0.15321 | 0.027375 | 0 |
| chr4 | 1.03E+08 | 1.03E+08 | 443 | 572 | 1.03E+08 | -0.17275 | 0.015256 | 0 |
| chr4 | 1.04E+08 | 1.04E+08 | 511 | 651 | 1.04E+08 | -0.15337 | 0.027252 | 0 |
| chr4 | 1.04E+08 | 1.04E+08 | 620 | 642 | 1.04E+08 | 0.145658 | 0.032931 | 0 |
| chr4 | 1.04E+08 | 1.04E+08 | 624 | 647 | 1.04E+08 | 0.143743 | 0.034746 | 0 |
| chr4 | 1.04E+08 | 1.04E+08 | 433 | 550 | 1.04E+08 | -0.1491  | 0.030762 | 0 |
| chr4 | 1.05E+08 | 1.05E+08 | 375 | 473 | 1.05E+08 | -0.13899 | 0.040599 | 0 |
| chr4 | 1.06E+08 | 1.06E+08 | 406 | 518 | 1.06E+08 | -0.15551 | 0.025624 | 0 |
| chr4 | 1.06E+08 | 1.06E+08 | 409 | 526 | 1.06E+08 | -0.167   | 0.018215 | 0 |
| chr4 | 1.06E+08 | 1.06E+08 | 558 | 581 | 1.06E+08 | 0.13769  | 0.041034 | 0 |
| chr4 | 1.06E+08 | 1.07E+08 | 416 | 530 | 1.06E+08 | -0.15345 | 0.027194 | 0 |
| chr4 | 1.07E+08 | 1.07E+08 | 443 | 569 | 1.07E+08 | -0.16516 | 0.019261 | 0 |

|      |          |          |     |     |          |          |          |   |
|------|----------|----------|-----|-----|----------|----------|----------|---|
| chr4 | 1.07E+08 | 1.07E+08 | 432 | 547 | 1.07E+08 | -0.14455 | 0.034914 | 0 |
| chr4 | 1.07E+08 | 1.08E+08 | 386 | 500 | 1.08E+08 | -0.17736 | 0.013188 | 0 |
| chr4 | 1.08E+08 | 1.08E+08 | 435 | 564 | 1.08E+08 | -0.17872 | 0.012631 | 0 |
| chr4 | 1.08E+08 | 1.08E+08 | 444 | 576 | 1.08E+08 | -0.17955 | 0.012299 | 0 |
| chr4 | 1.08E+08 | 1.08E+08 | 426 | 547 | 1.08E+08 | -0.16472 | 0.019515 | 0 |
| chr4 | 1.08E+08 | 1.09E+08 | 441 | 558 | 1.08E+08 | -0.14352 | 0.035908 | 0 |
| chr4 | 1.09E+08 | 1.09E+08 | 526 | 660 | 1.09E+08 | -0.13144 | 0.0495   | 0 |
| chr4 | 1.09E+08 | 1.09E+08 | 548 | 690 | 1.09E+08 | -0.13646 | 0.043424 | 0 |
| chr4 | 1.09E+08 | 1.09E+08 | 584 | 597 | 1.09E+08 | 0.1642   | 0.019075 | 0 |
| chr4 | 1.09E+08 | 1.09E+08 | 457 | 581 | 1.09E+08 | -0.15038 | 0.029673 | 0 |
| chr4 | 1.1E+08  | 1.1E+08  | 487 | 632 | 1.1E+08  | -0.18004 | 0.012105 | 0 |
| chr4 | 1.1E+08  | 1.1E+08  | 530 | 667 | 1.1E+08  | -0.13573 | 0.044264 | 0 |
| chr4 | 1.11E+08 | 1.11E+08 | 565 | 576 | 1.11E+08 | 0.168145 | 0.016879 | 0 |
| chr4 | 1.11E+08 | 1.11E+08 | 410 | 516 | 1.11E+08 | -0.13578 | 0.044202 | 0 |
| chr4 | 1.12E+08 | 1.12E+08 | 396 | 500 | 1.12E+08 | -0.14046 | 0.039018 | 0 |
| chr4 | 1.12E+08 | 1.12E+08 | 435 | 565 | 1.12E+08 | -0.18127 | 0.011633 | 0 |
| chr4 | 1.12E+08 | 1.12E+08 | 453 | 587 | 1.12E+08 | -0.17789 | 0.01297  | 0 |
| chr4 | 1.12E+08 | 1.12E+08 | 394 | 505 | 1.12E+08 | -0.16212 | 0.021098 | 0 |
| chr4 | 1.13E+08 | 1.13E+08 | 524 | 665 | 1.13E+08 | -0.14782 | 0.031883 | 0 |
| chr4 | 1.13E+08 | 1.13E+08 | 526 | 662 | 1.13E+08 | -0.13581 | 0.044177 | 0 |
| chr4 | 1.13E+08 | 1.14E+08 | 437 | 555 | 1.14E+08 | -0.14889 | 0.030944 | 0 |
| chr4 | 1.14E+08 | 1.14E+08 | 469 | 602 | 1.14E+08 | -0.16421 | 0.019819 | 0 |
| chr4 | 1.14E+08 | 1.14E+08 | 434 | 547 | 1.14E+08 | -0.13788 | 0.041813 | 0 |
| chr4 | 1.14E+08 | 1.14E+08 | 461 | 587 | 1.14E+08 | -0.15263 | 0.027836 | 0 |
| chr4 | 1.15E+08 | 1.15E+08 | 554 | 569 | 1.15E+08 | 0.15742  | 0.02342  | 0 |
| chr4 | 1.15E+08 | 1.15E+08 | 565 | 590 | 1.15E+08 | 0.133499 | 0.045907 | 0 |
| chr4 | 1.15E+08 | 1.15E+08 | 448 | 571 | 1.15E+08 | -0.15403 | 0.026742 | 0 |
| chr4 | 1.15E+08 | 1.15E+08 | 383 | 493 | 1.15E+08 | -0.16828 | 0.017516 | 0 |
| chr4 | 1.15E+08 | 1.15E+08 | 396 | 510 | 1.15E+08 | -0.16903 | 0.017115 | 0 |
| chr4 | 1.15E+08 | 1.15E+08 | 408 | 531 | 1.15E+08 | -0.18418 | 0.010582 | 0 |
| chr4 | 1.15E+08 | 1.15E+08 | 394 | 508 | 1.15E+08 | -0.17067 | 0.016273 | 0 |
| chr4 | 1.16E+08 | 1.16E+08 | 409 | 516 | 1.16E+08 | -0.13931 | 0.040252 | 0 |
| chr4 | 1.16E+08 | 1.16E+08 | 413 | 538 | 1.16E+08 | -0.1855  | 0.010133 | 0 |
| chr4 | 1.16E+08 | 1.16E+08 | 419 | 536 | 1.16E+08 | -0.15932 | 0.022927 | 0 |
| chr4 | 1.16E+08 | 1.16E+08 | 388 | 504 | 1.16E+08 | -0.1814  | 0.011584 | 0 |
| chr4 | 1.16E+08 | 1.16E+08 | 364 | 459 | 1.16E+08 | -0.13859 | 0.041029 | 0 |
| chr4 | 1.17E+08 | 1.17E+08 | 379 | 485 | 1.17E+08 | -0.15982 | 0.022588 | 0 |
| chr4 | 1.17E+08 | 1.17E+08 | 381 | 478 | 1.17E+08 | -0.13126 | 0.049734 | 0 |
| chr4 | 1.17E+08 | 1.17E+08 | 362 | 457 | 1.17E+08 | -0.14024 | 0.039254 | 0 |
| chr4 | 1.17E+08 | 1.17E+08 | 343 | 435 | 1.17E+08 | -0.14684 | 0.032766 | 0 |
| chr4 | 1.17E+08 | 1.17E+08 | 342 | 437 | 1.17E+08 | -0.15767 | 0.024061 | 0 |
| chr4 | 1.17E+08 | 1.17E+08 | 375 | 488 | 1.17E+08 | -0.18403 | 0.010635 | 0 |
| chr4 | 1.18E+08 | 1.18E+08 | 411 | 517 | 1.18E+08 | -0.13506 | 0.045048 | 0 |
| chr4 | 1.18E+08 | 1.18E+08 | 429 | 539 | 1.18E+08 | -0.13334 | 0.047118 | 0 |
| chr4 | 1.18E+08 | 1.18E+08 | 390 | 499 | 1.18E+08 | -0.1596  | 0.022736 | 0 |
| chr4 | 1.18E+08 | 1.18E+08 | 406 | 423 | 1.18E+08 | 0.136785 | 0.042049 | 0 |
| chr4 | 1.18E+08 | 1.18E+08 | 408 | 521 | 1.18E+08 | -0.15675 | 0.024717 | 0 |

|      |          |          |     |     |          |          |          |   |
|------|----------|----------|-----|-----|----------|----------|----------|---|
| chr4 | 1.19E+08 | 1.19E+08 | 405 | 511 | 1.19E+08 | -0.13944 | 0.04011  | 0 |
| chr4 | 1.19E+08 | 1.19E+08 | 337 | 435 | 1.19E+08 | -0.1723  | 0.015468 | 0 |
| chr4 | 1.19E+08 | 1.19E+08 | 454 | 582 | 1.19E+08 | -0.16236 | 0.020948 | 0 |
| chr4 | 1.19E+08 | 1.19E+08 | 430 | 540 | 1.19E+08 | -0.13266 | 0.047963 | 0 |
| chr4 | 1.19E+08 | 1.19E+08 | 362 | 469 | 1.19E+08 | -0.17764 | 0.013075 | 0 |
| chr4 | 1.19E+08 | 1.19E+08 | 144 | 184 | 1.19E+08 | -0.15767 | 0.024061 | 0 |
| chr4 | 1.2E+08  | 1.2E+08  | 348 | 352 | 1.2E+08  | 0.179475 | 0.011735 | 0 |
| chr4 | 1.2E+08  | 1.2E+08  | 489 | 622 | 1.2E+08  | -0.15112 | 0.029061 | 0 |
| chr4 | 1.2E+08  | 1.2E+08  | 515 | 539 | 1.20E+08 | 0.13025  | 0.049996 | 0 |
| chr4 | 1.2E+08  | 1.2E+08  | 510 | 530 | 1.2E+08  | 0.140468 | 0.038042 | 0 |
| chr4 | 1.2E+08  | 1.2E+08  | 538 | 562 | 1.2E+08  | 0.132999 | 0.046518 | 0 |
| chr4 | 1.2E+08  | 1.2E+08  | 99  | 103 | 1.2E+08  | 0.138819 | 0.039796 | 0 |
| chr4 | 1.21E+08 | 1.21E+08 | 438 | 551 | 1.21E+08 | -0.13516 | 0.044936 | 0 |
| chr4 | 1.21E+08 | 1.21E+08 | 451 | 566 | 1.21E+08 | -0.13171 | 0.049154 | 0 |
| chr4 | 1.21E+08 | 1.21E+08 | 409 | 525 | 1.21E+08 | -0.16425 | 0.019794 | 0 |
| chr4 | 1.22E+08 | 1.22E+08 | 434 | 545 | 1.22E+08 | -0.1326  | 0.04804  | 0 |
| chr4 | 1.22E+08 | 1.22E+08 | 450 | 565 | 1.22E+08 | -0.13236 | 0.048334 | 0 |
| chr4 | 1.24E+08 | 1.24E+08 | 518 | 660 | 1.24E+08 | -0.15355 | 0.027112 | 0 |
| chr4 | 1.24E+08 | 1.24E+08 | 498 | 516 | 1.24E+08 | 0.144738 | 0.033793 | 0 |
| chr4 | 1.24E+08 | 1.24E+08 | 477 | 605 | 1.24E+08 | -0.14698 | 0.032639 | 0 |
| chr4 | 1.24E+08 | 1.24E+08 | 426 | 554 | 1.24E+08 | -0.18307 | 0.010973 | 0 |
| chr4 | 1.24E+08 | 1.25E+08 | 444 | 563 | 1.24E+08 | -0.14661 | 0.032977 | 0 |
| chr4 | 1.25E+08 | 1.25E+08 | 378 | 479 | 1.25E+08 | -0.14568 | 0.033844 | 0 |
| chr4 | 1.25E+08 | 1.25E+08 | 398 | 512 | 1.25E+08 | -0.16741 | 0.017987 | 0 |
| chr4 | 1.25E+08 | 1.25E+08 | 475 | 600 | 1.25E+08 | -0.14107 | 0.038384 | 0 |
| chr4 | 1.25E+08 | 1.25E+08 | 483 | 609 | 1.25E+08 | -0.13846 | 0.041179 | 0 |
| chr4 | 1.25E+08 | 1.25E+08 | 442 | 575 | 1.25E+08 | -0.18355 | 0.010802 | 0 |
| chr4 | 1.26E+08 | 1.26E+08 | 457 | 575 | 1.26E+08 | -0.1354  | 0.044646 | 0 |
| chr4 | 1.26E+08 | 1.26E+08 | 441 | 559 | 1.26E+08 | -0.14611 | 0.033443 | 0 |
| chr4 | 1.27E+08 | 1.27E+08 | 441 | 566 | 1.27E+08 | -0.16406 | 0.01991  | 0 |
| chr4 | 1.27E+08 | 1.27E+08 | 421 | 545 | 1.27E+08 | -0.17647 | 0.013567 | 0 |
| chr4 | 1.27E+08 | 1.27E+08 | 355 | 461 | 1.27E+08 | -0.18098 | 0.011742 | 0 |
| chr4 | 1.27E+08 | 1.27E+08 | 398 | 508 | 1.27E+08 | -0.1561  | 0.025192 | 0 |
| chr4 | 1.27E+08 | 1.27E+08 | 428 | 553 | 1.27E+08 | -0.17371 | 0.014805 | 0 |
| chr4 | 1.27E+08 | 1.27E+08 | 432 | 549 | 1.27E+08 | -0.14981 | 0.030154 | 0 |
| chr4 | 1.28E+08 | 1.28E+08 | 426 | 538 | 1.28E+08 | -0.14079 | 0.038678 | 0 |
| chr4 | 1.28E+08 | 1.28E+08 | 401 | 515 | 1.28E+08 | -0.16501 | 0.01935  | 0 |
| chr4 | 1.28E+08 | 1.28E+08 | 391 | 508 | 1.28E+08 | -0.1817  | 0.011474 | 0 |
| chr4 | 1.29E+08 | 1.29E+08 | 595 | 611 | 1.29E+08 | 0.15768  | 0.02324  | 0 |
| chr4 | 1.29E+08 | 1.29E+08 | 526 | 537 | 1.29E+08 | 0.166104 | 0.017987 | 0 |
| chr4 | 1.29E+08 | 1.29E+08 | 493 | 622 | 1.29E+08 | -0.13936 | 0.04019  | 0 |
| chr4 | 1.29E+08 | 1.29E+08 | 578 | 728 | 1.29E+08 | -0.13691 | 0.042911 | 0 |
| chr4 | 1.29E+08 | 1.29E+08 | 510 | 652 | 1.29E+08 | -0.15841 | 0.023547 | 0 |
| chr4 | 1.29E+08 | 1.29E+08 | 527 | 676 | 1.29E+08 | -0.16326 | 0.020396 | 0 |
| chr4 | 1.29E+08 | 1.3E+08  | 516 | 653 | 1.3E+08  | -0.14375 | 0.035687 | 0 |
| chr4 | 1.3E+08  | 1.3E+08  | 505 | 635 | 1.3E+08  | -0.13451 | 0.045706 | 0 |
| chr4 | 1.3E+08  | 1.3E+08  | 480 | 610 | 1.3E+08  | -0.14981 | 0.030154 | 0 |



|      |          |          |     |     |          |          |          |   |
|------|----------|----------|-----|-----|----------|----------|----------|---|
| chr4 | 1.3E+08  | 1.3E+08  | 432 | 543 | 1.3E+08  | -0.13396 | 0.04637  | 0 |
| chr4 | 1.3E+08  | 1.31E+08 | 437 | 557 | 1.3E+08  | -0.15408 | 0.026702 | 0 |
| chr4 | 1.31E+08 | 1.31E+08 | 435 | 552 | 1.31E+08 | -0.14769 | 0.032003 | 0 |
| chr4 | 1.32E+08 | 1.32E+08 | 381 | 488 | 1.32E+08 | -0.16113 | 0.021734 | 0 |
| chr4 | 1.32E+08 | 1.32E+08 | 402 | 510 | 1.32E+08 | -0.14734 | 0.032318 | 0 |
| chr4 | 1.32E+08 | 1.32E+08 | 382 | 483 | 1.32E+08 | -0.14249 | 0.036938 | 0 |
| chr4 | 1.32E+08 | 1.32E+08 | 376 | 474 | 1.32E+08 | -0.13819 | 0.04147  | 0 |
| chr4 | 1.33E+08 | 1.33E+08 | 369 | 465 | 1.33E+08 | -0.13765 | 0.042076 | 0 |
| chr4 | 1.33E+08 | 1.33E+08 | 372 | 469 | 1.33E+08 | -0.13832 | 0.041326 | 0 |
| chr4 | 1.33E+08 | 1.33E+08 | 415 | 521 | 1.33E+08 | -0.13221 | 0.048527 | 0 |
| chr4 | 1.33E+08 | 1.33E+08 | 398 | 517 | 1.33E+08 | -0.18143 | 0.011573 | 0 |
| chr4 | 1.34E+08 | 1.34E+08 | 399 | 516 | 1.34E+08 | -0.17502 | 0.014205 | 0 |
| chr4 | 1.34E+08 | 1.34E+08 | 451 | 585 | 1.34E+08 | -0.17935 | 0.012378 | 0 |
| chr4 | 1.34E+08 | 1.34E+08 | 411 | 521 | 1.34E+08 | -0.14618 | 0.033373 | 0 |
| chr4 | 1.35E+08 | 1.35E+08 | 366 | 461 | 1.35E+08 | -0.13696 | 0.04285  | 0 |
| chr4 | 1.35E+08 | 1.35E+08 | 413 | 522 | 1.35E+08 | -0.14194 | 0.037487 | 0 |
| chr4 | 1.35E+08 | 1.35E+08 | 414 | 525 | 1.35E+08 | -0.14672 | 0.032876 | 0 |
| chr4 | 1.35E+08 | 1.35E+08 | 419 | 534 | 1.35E+08 | -0.15393 | 0.026821 | 0 |
| chr4 | 1.35E+08 | 1.35E+08 | 380 | 481 | 1.35E+08 | -0.14407 | 0.03537  | 0 |
| chr4 | 1.35E+08 | 1.35E+08 | 402 | 511 | 1.35E+08 | -0.15016 | 0.029855 | 0 |
| chr4 | 1.35E+08 | 1.35E+08 | 420 | 535 | 1.35E+08 | -0.15319 | 0.027397 | 0 |
| chr4 | 1.35E+08 | 1.36E+08 | 401 | 504 | 1.36E+08 | -0.13386 | 0.046491 | 0 |
| chr4 | 1.36E+08 | 1.36E+08 | 375 | 479 | 1.36E+08 | -0.15717 | 0.024416 | 0 |
| chr4 | 1.36E+08 | 1.36E+08 | 401 | 513 | 1.36E+08 | -0.15939 | 0.022877 | 0 |
| chr4 | 1.36E+08 | 1.36E+08 | 417 | 538 | 1.36E+08 | -0.1716  | 0.015812 | 0 |
| chr4 | 1.36E+08 | 1.36E+08 | 413 | 536 | 1.36E+08 | -0.18013 | 0.012071 | 0 |
| chr4 | 1.36E+08 | 1.36E+08 | 381 | 495 | 1.36E+08 | -0.18167 | 0.011482 | 0 |
| chr4 | 1.37E+08 | 1.37E+08 | 390 | 500 | 1.37E+08 | -0.16249 | 0.020869 | 0 |
| chr4 | 1.37E+08 | 1.37E+08 | 368 | 465 | 1.37E+08 | -0.14156 | 0.037878 | 0 |
| chr4 | 1.37E+08 | 1.37E+08 | 419 | 544 | 1.37E+08 | -0.18069 | 0.011853 | 0 |
| chr4 | 1.37E+08 | 1.37E+08 | 410 | 529 | 1.37E+08 | -0.17168 | 0.015771 | 0 |
| chr4 | 1.37E+08 | 1.37E+08 | 390 | 506 | 1.37E+08 | -0.1797  | 0.012238 | 0 |
| chr4 | 1.37E+08 | 1.37E+08 | 376 | 478 | 1.37E+08 | -0.15031 | 0.029728 | 0 |
| chr4 | 1.38E+08 | 1.38E+08 | 428 | 542 | 1.38E+08 | -0.14472 | 0.034749 | 0 |
| chr4 | 1.38E+08 | 1.38E+08 | 411 | 528 | 1.38E+08 | -0.16544 | 0.0191   | 0 |
| chr4 | 1.38E+08 | 1.38E+08 | 435 | 562 | 1.38E+08 | -0.17359 | 0.014858 | 0 |
| chr4 | 1.38E+08 | 1.38E+08 | 448 | 572 | 1.38E+08 | -0.15655 | 0.02486  | 0 |
| chr4 | 1.38E+08 | 1.39E+08 | 436 | 568 | 1.39E+08 | -0.1856  | 0.0101   | 0 |
| chr4 | 1.39E+08 | 1.39E+08 | 496 | 646 | 1.39E+08 | -0.18523 | 0.010223 | 0 |
| chr4 | 1.4E+08  | 1.4E+08  | 553 | 560 | 1.4E+08  | 0.177816 | 0.01239  | 0 |
| chr4 | 1.4E+08  | 1.4E+08  | 580 | 585 | 1.40E+08 | 0.183579 | 0.010241 | 0 |
| chr4 | 1.4E+08  | 1.4E+08  | 581 | 605 | 1.4E+08  | 0.137566 | 0.041172 | 0 |
| chr4 | 1.41E+08 | 1.41E+08 | 607 | 634 | 1.41E+08 | 0.133177 | 0.0463   | 0 |
| chr4 | 1.41E+08 | 1.41E+08 | 617 | 627 | 1.41E+08 | 0.172768 | 0.014584 | 0 |
| chr4 | 1.41E+08 | 1.41E+08 | 573 | 592 | 1.41E+08 | 0.148901 | 0.030035 | 0 |
| chr4 | 1.42E+08 | 1.42E+08 | 468 | 601 | 1.42E+08 | -0.16489 | 0.019416 | 0 |
| chr4 | 1.43E+08 | 1.43E+08 | 507 | 648 | 1.43E+08 | -0.15805 | 0.023801 | 0 |

|      |          |          |     |     |          |          |          |   |
|------|----------|----------|-----|-----|----------|----------|----------|---|
| chr4 | 1.43E+08 | 1.43E+08 | 434 | 549 | 1.43E+08 | -0.14315 | 0.036278 | 0 |
| chr4 | 1.43E+08 | 1.43E+08 | 439 | 568 | 1.43E+08 | -0.17571 | 0.0139   | 0 |
| chr4 | 1.43E+08 | 1.43E+08 | 505 | 653 | 1.43E+08 | -0.17484 | 0.014287 | 0 |
| chr4 | 1.43E+08 | 1.43E+08 | 484 | 614 | 1.43E+08 | -0.14727 | 0.032381 | 0 |
| chr4 | 1.44E+08 | 1.44E+08 | 421 | 534 | 1.44E+08 | -0.14706 | 0.032573 | 0 |
| chr4 | 1.44E+08 | 1.44E+08 | 467 | 599 | 1.44E+08 | -0.16317 | 0.020449 | 0 |
| chr4 | 1.44E+08 | 1.44E+08 | 429 | 542 | 1.44E+08 | -0.14135 | 0.038094 | 0 |
| chr4 | 1.45E+08 | 1.45E+08 | 419 | 535 | 1.45E+08 | -0.15663 | 0.024808 | 0 |
| chr4 | 1.45E+08 | 1.45E+08 | 378 | 480 | 1.45E+08 | -0.14869 | 0.031124 | 0 |
| chr4 | 1.45E+08 | 1.46E+08 | 419 | 526 | 1.45E+08 | -0.13215 | 0.048601 | 0 |
| chr4 | 1.46E+08 | 1.46E+08 | 458 | 585 | 1.46E+08 | -0.15713 | 0.024449 | 0 |
| chr4 | 1.46E+08 | 1.46E+08 | 383 | 490 | 1.46E+08 | -0.15947 | 0.022822 | 0 |
| chr4 | 1.47E+08 | 1.47E+08 | 497 | 630 | 1.47E+08 | -0.14614 | 0.033409 | 0 |
| chr4 | 1.48E+08 | 1.48E+08 | 427 | 536 | 1.48E+08 | -0.13203 | 0.048747 | 0 |
| chr4 | 1.48E+08 | 1.48E+08 | 476 | 609 | 1.48E+08 | -0.15952 | 0.022793 | 0 |
| chr4 | 1.48E+08 | 1.48E+08 | 481 | 604 | 1.48E+08 | -0.13255 | 0.048102 | 0 |
| chr4 | 1.48E+08 | 1.48E+08 | 434 | 547 | 1.48E+08 | -0.13788 | 0.041813 | 0 |
| chr4 | 1.48E+08 | 1.48E+08 | 481 | 604 | 1.48E+08 | -0.13255 | 0.048102 | 0 |
| chr4 | 1.48E+08 | 1.49E+08 | 643 | 670 | 1.49E+08 | 0.136621 | 0.042236 | 0 |
| chr4 | 1.5E+08  | 1.5E+08  | 481 | 493 | 1.5E+08  | 0.160412 | 0.02141  | 0 |
| chr4 | 1.5E+08  | 1.5E+08  | 506 | 519 | 1.5E+08  | 0.159366 | 0.022096 | 0 |
| chr4 | 1.5E+08  | 1.5E+08  | 426 | 548 | 1.50E+08 | -0.16736 | 0.018016 | 0 |
| chr4 | 1.5E+08  | 1.5E+08  | 429 | 554 | 1.5E+08  | -0.17295 | 0.015161 | 0 |
| chr4 | 1.5E+08  | 1.5E+08  | 392 | 504 | 1.5E+08  | -0.16661 | 0.018434 | 0 |
| chr4 | 1.5E+08  | 1.51E+08 | 459 | 585 | 1.5E+08  | -0.15398 | 0.02678  | 0 |
| chr4 | 1.51E+08 | 1.51E+08 | 456 | 584 | 1.51E+08 | -0.16097 | 0.021834 | 0 |
| chr4 | 1.52E+08 | 1.52E+08 | 499 | 631 | 1.52E+08 | -0.14264 | 0.036787 | 0 |
| chr4 | 1.52E+08 | 1.52E+08 | 494 | 631 | 1.52E+08 | -0.15717 | 0.02442  | 0 |
| chr4 | 1.52E+08 | 1.52E+08 | 533 | 546 | 1.52E+08 | 0.161198 | 0.020907 | 0 |
| chr4 | 1.53E+08 | 1.53E+08 | 551 | 693 | 1.53E+08 | -0.13484 | 0.045313 | 0 |
| chr4 | 1.54E+08 | 1.54E+08 | 533 | 675 | 1.54E+08 | -0.14479 | 0.034682 | 0 |
| chr4 | 1.54E+08 | 1.54E+08 | 688 | 708 | 1.54E+08 | 0.154622 | 0.025442 | 0 |
| chr4 | 1.54E+08 | 1.54E+08 | 621 | 641 | 1.54E+08 | 0.150232 | 0.028909 | 0 |
| chr4 | 1.55E+08 | 1.55E+08 | 462 | 600 | 1.55E+08 | -0.18111 | 0.011696 | 0 |
| chr4 | 1.55E+08 | 1.55E+08 | 422 | 541 | 1.55E+08 | -0.16242 | 0.020911 | 0 |
| chr4 | 1.55E+08 | 1.55E+08 | 543 | 556 | 1.55E+08 | 0.16183  | 0.020509 | 0 |
| chr4 | 1.56E+08 | 1.56E+08 | 432 | 548 | 1.56E+08 | -0.14718 | 0.032459 | 0 |
| chr4 | 1.56E+08 | 1.56E+08 | 404 | 518 | 1.56E+08 | -0.16263 | 0.02078  | 0 |
| chr4 | 1.57E+08 | 1.57E+08 | 422 | 548 | 1.57E+08 | -0.18097 | 0.011747 | 0 |
| chr4 | 1.57E+08 | 1.57E+08 | 364 | 472 | 1.57E+08 | -0.17889 | 0.012563 | 0 |
| chr4 | 1.57E+08 | 1.57E+08 | 390 | 494 | 1.57E+08 | -0.14507 | 0.034411 | 0 |
| chr4 | 1.57E+08 | 1.57E+08 | 372 | 467 | 1.57E+08 | -0.13216 | 0.048592 | 0 |
| chr4 | 1.57E+08 | 1.57E+08 | 452 | 579 | 1.57E+08 | -0.16128 | 0.021637 | 0 |
| chr4 | 1.57E+08 | 1.58E+08 | 448 | 574 | 1.57E+08 | -0.16159 | 0.021437 | 0 |
| chr4 | 1.57E+08 | 1.58E+08 | 453 | 583 | 1.58E+08 | -0.16802 | 0.017655 | 0 |
| chr4 | 1.58E+08 | 1.58E+08 | 443 | 563 | 1.58E+08 | -0.14987 | 0.030108 | 0 |
| chr4 | 1.58E+08 | 1.58E+08 | 421 | 531 | 1.58E+08 | -0.13893 | 0.040662 | 0 |

|      |          |          |     |     |          |          |          |   |
|------|----------|----------|-----|-----|----------|----------|----------|---|
| chr4 | 1.58E+08 | 1.58E+08 | 426 | 550 | 1.58E+08 | -0.17262 | 0.015318 | 0 |
| chr4 | 1.59E+08 | 1.59E+08 | 410 | 515 | 1.59E+08 | -0.13299 | 0.04756  | 0 |
| chr4 | 1.59E+08 | 1.59E+08 | 444 | 567 | 1.59E+08 | -0.15683 | 0.024663 | 0 |
| chr4 | 1.6E+08  | 1.6E+08  | 615 | 638 | 1.6E+08  | 0.142993 | 0.03548  | 0 |
| chr4 | 1.6E+08  | 1.6E+08  | 602 | 622 | 1.6E+08  | 0.148812 | 0.030112 | 0 |
| chr4 | 1.6E+08  | 1.6E+08  | 445 | 569 | 1.6E+08  | -0.15866 | 0.023375 | 0 |
| chr4 | 1.6E+08  | 1.61E+08 | 394 | 495 | 1.61E+08 | -0.13327 | 0.047209 | 0 |
| chr4 | 1.61E+08 | 1.61E+08 | 365 | 469 | 1.61E+08 | -0.16573 | 0.018932 | 0 |
| chr4 | 1.61E+08 | 1.61E+08 | 384 | 500 | 1.61E+08 | -0.18486 | 0.010349 | 0 |
| chr4 | 1.61E+08 | 1.61E+08 | 400 | 503 | 1.61E+08 | -0.1346  | 0.045604 | 0 |
| chr4 | 1.62E+08 | 1.62E+08 | 358 | 466 | 1.62E+08 | -0.18441 | 0.010504 | 0 |
| chr4 | 1.62E+08 | 1.62E+08 | 357 | 453 | 1.62E+08 | -0.14762 | 0.032062 | 0 |
| chr4 | 1.62E+08 | 1.62E+08 | 411 | 530 | 1.62E+08 | -0.17089 | 0.016162 | 0 |
| chr4 | 1.62E+08 | 1.62E+08 | 391 | 505 | 1.62E+08 | -0.17315 | 0.015064 | 0 |
| chr4 | 1.62E+08 | 1.62E+08 | 410 | 534 | 1.62E+08 | -0.18525 | 0.010216 | 0 |
| chr4 | 1.62E+08 | 1.62E+08 | 404 | 509 | 1.62E+08 | -0.13735 | 0.042412 | 0 |
| chr4 | 1.63E+08 | 1.63E+08 | 341 | 440 | 1.63E+08 | -0.17177 | 0.015728 | 0 |
| chr4 | 1.63E+08 | 1.63E+08 | 404 | 509 | 1.63E+08 | -0.13735 | 0.042412 | 0 |
| chr4 | 1.63E+08 | 1.63E+08 | 400 | 513 | 1.63E+08 | -0.163   | 0.020556 | 0 |
| chr4 | 1.63E+08 | 1.64E+08 | 411 | 532 | 1.63E+08 | -0.17632 | 0.013631 | 0 |
| chr4 | 1.64E+08 | 1.64E+08 | 417 | 529 | 1.64E+08 | -0.14726 | 0.032391 | 0 |
| chr4 | 1.64E+08 | 1.64E+08 | 435 | 565 | 1.64E+08 | -0.18127 | 0.011633 | 0 |
| chr4 | 1.65E+08 | 1.65E+08 | 414 | 530 | 1.65E+08 | -0.1604  | 0.022208 | 0 |
| chr4 | 1.65E+08 | 1.65E+08 | 372 | 473 | 1.65E+08 | -0.15057 | 0.029511 | 0 |
| chr4 | 1.65E+08 | 1.65E+08 | 324 | 418 | 1.65E+08 | -0.17155 | 0.015837 | 0 |
| chr4 | 1.65E+08 | 1.65E+08 | 337 | 433 | 1.65E+08 | -0.16566 | 0.018974 | 0 |
| chr4 | 1.65E+08 | 1.65E+08 | 399 | 508 | 1.65E+08 | -0.15248 | 0.027958 | 0 |
| chr4 | 1.66E+08 | 1.66E+08 | 270 | 277 | 1.66E+08 | 0.159036 | 0.022315 | 0 |
| chr4 | 1.67E+08 | 1.67E+08 | 489 | 633 | 1.67E+08 | -0.17641 | 0.013595 | 0 |
| chr4 | 1.67E+08 | 1.67E+08 | 468 | 592 | 1.67E+08 | -0.14313 | 0.036301 | 0 |
| chr4 | 1.67E+08 | 1.67E+08 | 389 | 488 | 1.67E+08 | -0.13115 | 0.049874 | 0 |
| chr4 | 1.68E+08 | 1.68E+08 | 294 | 383 | 1.68E+08 | -0.18557 | 0.010112 | 0 |
| chr4 | 1.68E+08 | 1.68E+08 | 343 | 446 | 1.68E+08 | -0.18287 | 0.011044 | 0 |
| chr4 | 1.68E+08 | 1.68E+08 | 422 | 539 | 1.68E+08 | -0.15708 | 0.024482 | 0 |
| chr4 | 1.68E+08 | 1.68E+08 | 414 | 524 | 1.68E+08 | -0.14397 | 0.035469 | 0 |
| chr4 | 1.68E+08 | 1.68E+08 | 411 | 520 | 1.68E+08 | -0.14341 | 0.036019 | 0 |
| chr4 | 1.68E+08 | 1.68E+08 | 425 | 547 | 1.68E+08 | -0.16811 | 0.017605 | 0 |
| chr4 | 1.69E+08 | 1.69E+08 | 429 | 540 | 1.69E+08 | -0.13602 | 0.04393  | 0 |
| chr4 | 1.69E+08 | 1.69E+08 | 437 | 561 | 1.69E+08 | -0.1644  | 0.019705 | 0 |
| chr4 | 1.69E+08 | 1.69E+08 | 500 | 643 | 1.69E+08 | -0.16693 | 0.018255 | 0 |
| chr4 | 1.69E+08 | 1.69E+08 | 528 | 670 | 1.69E+08 | -0.14766 | 0.032029 | 0 |
| chr4 | 1.69E+08 | 1.69E+08 | 512 | 650 | 1.69E+08 | -0.14833 | 0.031433 | 0 |
| chr4 | 1.69E+08 | 1.7E+08  | 670 | 688 | 1.69E+08 | 0.157716 | 0.023215 | 0 |
| chr4 | 1.7E+08  | 1.7E+08  | 687 | 718 | 1.7E+08  | 0.132289 | 0.047397 | 0 |
| chr4 | 1.7E+08  | 1.7E+08  | 674 | 682 | 1.7E+08  | 0.17894  | 0.011943 | 0 |
| chr4 | 1.7E+08  | 1.7E+08  | 653 | 660 | 1.7E+08  | 0.18058  | 0.011315 | 0 |
| chr4 | 1.7E+08  | 1.7E+08  | 610 | 637 | 1.7E+08  | 0.133479 | 0.045931 | 0 |

|      |          |          |     |     |          |          |          |   |
|------|----------|----------|-----|-----|----------|----------|----------|---|
| chr4 | 1.7E+08  | 1.7E+08  | 593 | 598 | 1.7E+08  | 0.18385  | 0.010149 | 0 |
| chr4 | 1.71E+08 | 1.71E+08 | 534 | 558 | 1.71E+08 | 0.132538 | 0.047088 | 0 |
| chr4 | 1.71E+08 | 1.71E+08 | 367 | 470 | 1.71E+08 | -0.16092 | 0.021869 | 0 |
| chr4 | 1.71E+08 | 1.71E+08 | 384 | 487 | 1.71E+08 | -0.14685 | 0.032758 | 0 |
| chr4 | 1.71E+08 | 1.72E+08 | 421 | 538 | 1.71E+08 | -0.15782 | 0.023956 | 0 |
| chr4 | 1.72E+08 | 1.72E+08 | 415 | 526 | 1.72E+08 | -0.14599 | 0.033553 | 0 |
| chr4 | 1.72E+08 | 1.72E+08 | 432 | 542 | 1.72E+08 | -0.1313  | 0.049681 | 0 |
| chr4 | 1.73E+08 | 1.73E+08 | 445 | 566 | 1.73E+08 | -0.15103 | 0.02913  | 0 |
| chr4 | 1.73E+08 | 1.73E+08 | 455 | 578 | 1.73E+08 | -0.14924 | 0.030643 | 0 |
| chr4 | 1.74E+08 | 1.74E+08 | 509 | 646 | 1.74E+08 | -0.14791 | 0.031811 | 0 |
| chr4 | 1.74E+08 | 1.74E+08 | 484 | 616 | 1.74E+08 | -0.15196 | 0.028373 | 0 |
| chr4 | 1.74E+08 | 1.74E+08 | 615 | 640 | 1.74E+08 | 0.138478 | 0.040167 | 0 |
| chr4 | 1.74E+08 | 1.75E+08 | 553 | 696 | 1.74E+08 | -0.13584 | 0.044131 | 0 |
| chr4 | 1.75E+08 | 1.75E+08 | 501 | 635 | 1.75E+08 | -0.14598 | 0.033558 | 0 |
| chr4 | 1.76E+08 | 1.76E+08 | 479 | 493 | 1.76E+08 | 0.154401 | 0.025608 | 0 |
| chr4 | 1.76E+08 | 1.77E+08 | 386 | 499 | 1.77E+08 | -0.17448 | 0.014451 | 0 |
| chr4 | 1.77E+08 | 1.77E+08 | 437 | 557 | 1.77E+08 | -0.15408 | 0.026702 | 0 |
| chr4 | 1.78E+08 | 1.78E+08 | 426 | 547 | 1.78E+08 | -0.16472 | 0.019515 | 0 |
| chr4 | 1.78E+08 | 1.78E+08 | 393 | 508 | 1.78E+08 | -0.17434 | 0.014514 | 0 |
| chr4 | 1.78E+08 | 1.78E+08 | 470 | 597 | 1.78E+08 | -0.14911 | 0.030757 | 0 |
| chr4 | 1.79E+08 | 1.79E+08 | 434 | 561 | 1.79E+08 | -0.17434 | 0.014511 | 0 |
| chr4 | 1.79E+08 | 1.79E+08 | 421 | 529 | 1.79E+08 | -0.13348 | 0.046946 | 0 |
| chr4 | 1.79E+08 | 1.79E+08 | 399 | 511 | 1.79E+08 | -0.16097 | 0.021834 | 0 |
| chr4 | 1.79E+08 | 1.79E+08 | 386 | 489 | 1.79E+08 | -0.14527 | 0.034225 | 0 |
| chr4 | 1.8E+08  | 1.8E+08  | 370 | 472 | 1.8E+08  | -0.1553  | 0.025781 | 0 |
| chr4 | 1.8E+08  | 1.8E+08  | 390 | 498 | 1.80E+08 | -0.15671 | 0.024748 | 0 |
| chr4 | 1.8E+08  | 1.8E+08  | 409 | 519 | 1.8E+08  | -0.14767 | 0.03202  | 0 |
| chr4 | 1.8E+08  | 1.8E+08  | 451 | 570 | 1.8E+08  | -0.14187 | 0.037562 | 0 |
| chr4 | 1.8E+08  | 1.8E+08  | 437 | 557 | 1.8E+08  | -0.15408 | 0.026702 | 0 |
| chr4 | 1.8E+08  | 1.81E+08 | 424 | 535 | 1.8E+08  | -0.13951 | 0.040032 | 0 |
| chr4 | 1.81E+08 | 1.81E+08 | 336 | 430 | 1.81E+08 | -0.15991 | 0.022529 | 0 |
| chr4 | 1.81E+08 | 1.81E+08 | 416 | 535 | 1.81E+08 | -0.16699 | 0.018219 | 0 |
| chr4 | 1.81E+08 | 1.81E+08 | 430 | 542 | 1.81E+08 | -0.13799 | 0.04169  | 0 |
| chr4 | 1.82E+08 | 1.82E+08 | 427 | 554 | 1.82E+08 | -0.17969 | 0.012244 | 0 |
| chr4 | 1.82E+08 | 1.82E+08 | 421 | 540 | 1.82E+08 | -0.16318 | 0.020445 | 0 |
| chr4 | 1.82E+08 | 1.82E+08 | 409 | 524 | 1.82E+08 | -0.1615  | 0.021492 | 0 |
| chr4 | 1.82E+08 | 1.82E+08 | 417 | 525 | 1.82E+08 | -0.13631 | 0.043597 | 0 |
| chr4 | 1.82E+08 | 1.82E+08 | 433 | 558 | 1.82E+08 | -0.16994 | 0.016647 | 0 |
| chr4 | 1.83E+08 | 1.83E+08 | 515 | 538 | 1.83E+08 | 0.132929 | 0.046604 | 0 |
| chr4 | 1.83E+08 | 1.83E+08 | 559 | 572 | 1.83E+08 | 0.162796 | 0.019914 | 0 |
| chr4 | 1.84E+08 | 1.84E+08 | 688 | 720 | 1.84E+08 | 0.130375 | 0.049834 | 0 |
| chr4 | 1.85E+08 | 1.85E+08 | 581 | 595 | 1.85E+08 | 0.161612 | 0.020646 | 0 |
| chr4 | 1.85E+08 | 1.85E+08 | 564 | 574 | 1.85E+08 | 0.170607 | 0.015621 | 0 |
| chr4 | 1.85E+08 | 1.85E+08 | 648 | 677 | 1.85E+08 | 0.132801 | 0.046762 | 0 |
| chr4 | 1.85E+08 | 1.86E+08 | 549 | 557 | 1.85E+08 | 0.175092 | 0.013535 | 0 |
| chr4 | 1.86E+08 | 1.86E+08 | 525 | 683 | 1.86E+08 | -0.18361 | 0.010783 | 0 |
| chr4 | 1.87E+08 | 1.87E+08 | 658 | 683 | 1.87E+08 | 0.142165 | 0.036304 | 0 |

|      |          |          |      |      |          |          |          |   |
|------|----------|----------|------|------|----------|----------|----------|---|
| chr4 | 1.88E+08 | 1.88E+08 | 253  | 257  | 1.88E+08 | 0.173332 | 0.014323 | 0 |
| chr4 | 1.88E+08 | 1.88E+08 | 438  | 569  | 1.88E+08 | -0.18153 | 0.011535 | 0 |
| chr4 | 1.88E+08 | 1.88E+08 | 416  | 535  | 1.88E+08 | -0.16699 | 0.018219 | 0 |
| chr4 | 1.89E+08 | 1.89E+08 | 443  | 563  | 1.89E+08 | -0.14987 | 0.030108 | 0 |
| chr4 | 1.89E+08 | 1.89E+08 | 462  | 597  | 1.89E+08 | -0.17388 | 0.014726 | 0 |
| chr4 | 1.9E+08  | 1.9E+08  | 405  | 521  | 1.9E+08  | -0.1674  | 0.017995 | 0 |
| chr4 | 1.9E+08  | 1.9E+08  | 425  | 550  | 1.9E+08  | -0.17601 | 0.013769 | 0 |
| chr4 | 1.91E+08 | 1.91E+08 | 1048 | 1333 | 1.91E+08 | -0.15108 | 0.029096 | 0 |
| chr5 | 200001   | 300000   | 1216 | 1145 | 250000   | 0.282759 | 0.000185 | 0 |
| chr5 | 250001   | 350000   | 1724 | 1678 | 3.00E+05 | 0.23498  | 0.001521 | 0 |
| chr5 | 650001   | 750000   | 1234 | 1152 | 7.00E+05 | 0.295165 | 0.000101 | 0 |
| chr5 | 700001   | 800000   | 843  | 775  | 750000   | 0.317299 | 3.29E-05 | 0 |
| chr5 | 1100001  | 1200000  | 2952 | 2923 | 1150000  | 0.210206 | 0.003996 | 0 |
| chr5 | 1450001  | 1550000  | 2886 | 2766 | 1500000  | 0.257233 | 0.000593 | 0 |
| chr5 | 1500001  | 1600000  | 2162 | 2095 | 1550000  | 0.241379 | 0.001168 | 0 |
| chr5 | 9550001  | 9650000  | 1556 | 2056 | 9600000  | -0.20604 | 0.005011 | 0 |
| chr5 | 11500001 | 11600000 | 1590 | 2073 | 11550000 | -0.18673 | 0.00973  | 0 |
| chr5 | 12200001 | 12300000 | 1489 | 1948 | 12250000 | -0.19169 | 0.008245 | 0 |
| chr5 | 15150001 | 15250000 | 1645 | 2156 | 15200000 | -0.19431 | 0.007544 | 0 |
| chr5 | 15200001 | 15300000 | 1470 | 1926 | 15250000 | -0.19383 | 0.007667 | 0 |
| chr5 | 19000001 | 19100000 | 1134 | 1497 | 19050000 | -0.20469 | 0.005256 | 0 |
| chr5 | 19550001 | 19650000 | 1181 | 1540 | 19600000 | -0.18696 | 0.009657 | 0 |
| chr5 | 19850001 | 19950000 | 1266 | 1653 | 19900000 | -0.18885 | 0.009069 | 0 |
| chr5 | 20700001 | 20800000 | 97   | 137  | 20750000 | -0.30216 | 8.84E-05 | 0 |
| chr5 | 20750001 | 20850000 | 131  | 199  | 20800000 | -0.40724 | 2.78E-07 | 0 |
| chr5 | 20800001 | 20900000 | 162  | 246  | 20850000 | -0.4067  | 2.87E-07 | 0 |
| chr5 | 22450001 | 22550000 | 1252 | 1679 | 22500000 | -0.2274  | 0.002269 | 0 |
| chr5 | 22500001 | 22600000 | 1223 | 1612 | 22550000 | -0.20246 | 0.005686 | 0 |
| chr5 | 22700001 | 22800000 | 1211 | 1613 | 22750000 | -0.21758 | 0.00329  | 0 |
| chr5 | 22750001 | 22850000 | 1169 | 1540 | 22800000 | -0.20169 | 0.005843 | 0 |
| chr5 | 23050001 | 23150000 | 1207 | 1578 | 23100000 | -0.19071 | 0.008521 | 0 |
| chr5 | 23100001 | 23200000 | 1176 | 1547 | 23150000 | -0.19962 | 0.006281 | 0 |
| chr5 | 24900001 | 25000000 | 1369 | 1788 | 24950000 | -0.18926 | 0.008945 | 0 |
| chr5 | 26000001 | 26100000 | 1286 | 1742 | 26050000 | -0.24189 | 0.001281 | 0 |
| chr5 | 26350001 | 26450000 | 1274 | 1691 | 26400000 | -0.21255 | 0.003961 | 0 |
| chr5 | 26750001 | 26850000 | 1278 | 1693 | 26800000 | -0.20973 | 0.004388 | 0 |
| chr5 | 28050001 | 28150000 | 1156 | 1521 | 28100000 | -0.19992 | 0.006217 | 0 |
| chr5 | 29300001 | 29400000 | 1362 | 1797 | 29350000 | -0.2039  | 0.005405 | 0 |
| chr5 | 29700001 | 29800000 | 1221 | 1613 | 29750000 | -0.20572 | 0.005067 | 0 |
| chr5 | 29750001 | 29850000 | 1217 | 1654 | 29800000 | -0.24667 | 0.001054 | 0 |
| chr5 | 29800001 | 29900000 | 1299 | 1700 | 29850000 | -0.19217 | 0.008111 | 0 |
| chr5 | 29850001 | 29950000 | 1285 | 1726 | 29900000 | -0.2297  | 0.002076 | 0 |
| chr5 | 29900001 | 30000000 | 1356 | 1777 | 29950000 | -0.19412 | 0.007591 | 0 |
| chr5 | 30300001 | 30400000 | 1217 | 1695 | 30350000 | -0.28199 | 0.000228 | 0 |
| chr5 | 30350001 | 30450000 | 1192 | 1561 | 30400000 | -0.19312 | 0.007853 | 0 |
| chr5 | 30950001 | 31050000 | 1209 | 1577 | 3.10E+07 | -0.18741 | 0.009515 | 0 |
| chr5 | 41400001 | 41500000 | 1124 | 1480 | 41450000 | -0.20099 | 0.005988 | 0 |

|      |          |          |      |      |          |          |          |   |
|------|----------|----------|------|------|----------|----------|----------|---|
| chr5 | 41450001 | 41550000 | 1088 | 1480 | 41500000 | -0.24796 | 0.001    | 0 |
| chr5 | 41500001 | 41600000 | 1079 | 1411 | 41550000 | -0.19106 | 0.008421 | 0 |
| chr5 | 41850001 | 41950000 | 1619 | 1629 | 41900000 | 0.187079 | 0.009101 | 0 |
| chr5 | 42300001 | 42400000 | 1082 | 1468 | 42350000 | -0.24419 | 0.001167 | 0 |
| chr5 | 42350001 | 42450000 | 1097 | 1446 | 42400000 | -0.20254 | 0.005671 | 0 |
| chr5 | 42950001 | 43050000 | 1509 | 1510 | 4.30E+07 | 0.195007 | 0.006922 | 0 |
| chr5 | 43050001 | 43150000 | 1338 | 1333 | 43100000 | 0.201364 | 0.005523 | 0 |
| chr5 | 45200001 | 45300000 | 1015 | 1335 | 45250000 | -0.1994  | 0.006331 | 0 |
| chr5 | 45250001 | 45350000 | 976  | 1307 | 45300000 | -0.22534 | 0.002455 | 0 |
| chr5 | 45850001 | 45950000 | 769  | 1015 | 45900000 | -0.20446 | 0.005299 | 0 |
| chr5 | 46400001 | 46500000 | 45   | 59   | 46450000 | -0.19483 | 0.007411 | 0 |
| chr5 | 49350001 | 49450000 | 46   | 78   | 49400000 | -0.56588 | 4.19E-12 | 0 |
| chr5 | 49400001 | 49500000 | 210  | 287  | 49450000 | -0.2547  | 0.000755 | 0 |
| chr5 | 49750001 | 49850000 | 142  | 204  | 49800000 | -0.32672 | 2.60E-05 | 0 |
| chr5 | 49800001 | 49900000 | 206  | 294  | 49850000 | -0.31721 | 4.21E-05 | 0 |
| chr5 | 50350001 | 50450000 | 372  | 487  | 50400000 | -0.19266 | 0.007979 | 0 |
| chr5 | 50700001 | 50800000 | 397  | 538  | 50750000 | -0.2425  | 0.001249 | 0 |
| chr5 | 50750001 | 50850000 | 399  | 547  | 50800000 | -0.25919 | 0.000624 | 0 |
| chr5 | 50800001 | 50900000 | 401  | 537  | 50850000 | -0.22536 | 0.002454 | 0 |
| chr5 | 50850001 | 50950000 | 381  | 512  | 50900000 | -0.23039 | 0.002021 | 0 |
| chr5 | 50950001 | 51050000 | 369  | 482  | 5.10E+07 | -0.18945 | 0.008888 | 0 |
| chr5 | 51100001 | 51200000 | 407  | 532  | 51150000 | -0.19043 | 0.0086   | 0 |
| chr5 | 51550001 | 51650000 | 378  | 564  | 51600000 | -0.38135 | 1.30E-06 | 0 |
| chr5 | 51700001 | 51800000 | 475  | 633  | 51750000 | -0.21831 | 0.003202 | 0 |
| chr5 | 51900001 | 52000000 | 465  | 610  | 51950000 | -0.19562 | 0.007213 | 0 |
| chr5 | 51950001 | 52050000 | 439  | 634  | 5.20E+07 | -0.3343  | 1.75E-05 | 0 |
| chr5 | 52850001 | 52950000 | 462  | 614  | 52900000 | -0.21438 | 0.003703 | 0 |
| chr5 | 53850001 | 53950000 | 511  | 670  | 53900000 | -0.19487 | 0.007399 | 0 |
| chr5 | 54450001 | 54550000 | 656  | 639  | 54500000 | 0.233843 | 0.001593 | 0 |
| chr5 | 56300001 | 56400000 | 466  | 616  | 56350000 | -0.20664 | 0.004904 | 0 |
| chr5 | 56800001 | 56900000 | 461  | 642  | 56850000 | -0.28184 | 0.000229 | 0 |
| chr5 | 58200001 | 58300000 | 655  | 648  | 58250000 | 0.211464 | 0.003813 | 0 |
| chr5 | 58500001 | 58600000 | 1023 | 995  | 58550000 | 0.236001 | 0.001459 | 0 |
| chr5 | 58550001 | 58650000 | 1017 | 1014 | 58600000 | 0.200225 | 0.005754 | 0 |
| chr5 | 61050001 | 61150000 | 778  | 1015 | 61100000 | -0.18767 | 0.00943  | 0 |
| chr5 | 61100001 | 61200000 | 730  | 960  | 61150000 | -0.19917 | 0.00638  | 0 |
| chr5 | 62600001 | 62700000 | 565  | 742  | 62650000 | -0.19721 | 0.00683  | 0 |
| chr5 | 63700001 | 63800000 | 501  | 681  | 63750000 | -0.24688 | 0.001045 | 0 |
| chr5 | 64800001 | 64900000 | 975  | 977  | 64850000 | 0.193007 | 0.007424 | 0 |
| chr5 | 64850001 | 64950000 | 952  | 949  | 64900000 | 0.200517 | 0.005694 | 0 |
| chr5 | 68900001 | 69000000 | 4    | 4    | 68950000 | 0.195963 | 0.006694 | 0 |
| chr5 | 69050001 | 69150000 | 1    | 1    | 69100000 | 0.195963 | 0.006694 | 0 |
| chr5 | 69100001 | 69200000 | 1    | 1    | 69150000 | 0.195963 | 0.006694 | 0 |
| chr5 | 69150001 | 69250000 | 1    | 1    | 69200000 | 0.195963 | 0.006694 | 0 |
| chr5 | 69200001 | 69300000 | 2    | 4    | 69250000 | -0.80404 | 3.29E-21 | 0 |
| chr5 | 69250001 | 69350000 | 7    | 7    | 69300000 | 0.195963 | 0.006694 | 0 |
| chr5 | 69300001 | 69400000 | 9    | 6    | 69350000 | 0.780926 | 1.60E-21 | 0 |

|      |          |          |     |     |          |          |          |   |
|------|----------|----------|-----|-----|----------|----------|----------|---|
| chr5 | 69350001 | 69450000 | 6   | 9   | 69400000 | -0.389   | 8.31E-07 | 0 |
| chr5 | 69400001 | 69500000 | 5   | 13  | 69450000 | -1.18255 | 2.87E-38 | 0 |
| chr5 | 69450001 | 69550000 | 2   | 6   | 69500000 | -1.389   | 6.26E-48 | 0 |
| chr5 | 69550001 | 69650000 | 4   | 1   | 69600000 | 2.195963 | 8.22E-92 | 0 |
| chr5 | 69600001 | 69700000 | 5   | 2   | 69650000 | 1.517891 | 1.18E-59 | 0 |
| chr5 | 69650001 | 69750000 | 5   | 4   | 69700000 | 0.517891 | 6.05E-11 | 0 |
| chr5 | 69700001 | 69800000 | 4   | 3   | 69750000 | 0.611001 | 2.44E-14 | 0 |
| chr5 | 69750001 | 69850000 | 5   | 2   | 69800000 | 1.517891 | 1.18E-59 | 0 |
| chr5 | 69800001 | 69900000 | 6   | 2   | 69850000 | 1.780926 | 4.68E-73 | 0 |
| chr5 | 69850001 | 69950000 | 1   | 3   | 69900000 | -1.389   | 6.26E-48 | 0 |
| chr5 | 69900001 | 70000000 | 2   | 5   | 69950000 | -1.12597 | 1.27E-35 | 0 |
| chr5 | 69950001 | 70050000 | 2   | 2   | 7.00E+07 | 0.195963 | 0.006694 | 0 |
| chr5 | 70000001 | 70100000 | 1   | 3   | 70050000 | -1.389   | 6.26E-48 | 0 |
| chr5 | 70050001 | 70150000 | 1   | 4   | 70100000 | -1.80404 | 2.39E-66 | 0 |
| chr5 | 70100001 | 70200000 | 1   | 2   | 70150000 | -0.80404 | 3.29E-21 | 0 |
| chr5 | 70150001 | 70250000 | 5   | 3   | 70200000 | 0.932929 | 8.75E-29 | 0 |
| chr5 | 70200001 | 70300000 | 6   | 4   | 70250000 | 0.780926 | 1.60E-21 | 0 |
| chr5 | 70250001 | 70350000 | 33  | 48  | 70300000 | -0.34461 | 1.02E-05 | 0 |
| chr5 | 70300001 | 70400000 | 36  | 54  | 70350000 | -0.389   | 8.31E-07 | 0 |
| chr5 | 70350001 | 70450000 | 8   | 13  | 70400000 | -0.50448 | 4.22E-10 | 0 |
| chr5 | 70400001 | 70500000 | 5   | 7   | 70450000 | -0.28946 | 0.000161 | 0 |
| chr5 | 70450001 | 70550000 | 3   | 2   | 70500000 | 0.780926 | 1.60E-21 | 0 |
| chr5 | 70550001 | 70650000 | 5   | 7   | 70600000 | -0.28946 | 0.000161 | 0 |
| chr5 | 77100001 | 77200000 | 736 | 969 | 77150000 | -0.20083 | 0.006022 | 0 |
| chr5 | 81950001 | 82050000 | 676 | 909 | 8.20E+07 | -0.23129 | 0.001951 | 0 |
| chr5 | 82000001 | 82100000 | 648 | 873 | 82050000 | -0.23402 | 0.001753 | 0 |
| chr5 | 82050001 | 82150000 | 651 | 857 | 82100000 | -0.20067 | 0.006055 | 0 |
| chr5 | 82100001 | 82200000 | 606 | 836 | 82150000 | -0.26822 | 0.000422 | 0 |
| chr5 | 82150001 | 82250000 | 575 | 761 | 82200000 | -0.20837 | 0.004609 | 0 |
| chr5 | 82850001 | 82950000 | 650 | 856 | 82900000 | -0.20121 | 0.005943 | 0 |
| chr5 | 82900001 | 83000000 | 636 | 871 | 82950000 | -0.25768 | 0.000666 | 0 |
| chr5 | 82950001 | 83050000 | 627 | 824 | 8.30E+07 | -0.19822 | 0.006595 | 0 |
| chr5 | 83200001 | 83300000 | 641 | 852 | 83250000 | -0.21457 | 0.003679 | 0 |
| chr5 | 83250001 | 83350000 | 620 | 828 | 83300000 | -0.2214  | 0.002852 | 0 |
| chr5 | 83300001 | 83400000 | 566 | 739 | 83350000 | -0.18881 | 0.009081 | 0 |
| chr5 | 83600001 | 83700000 | 600 | 797 | 83650000 | -0.21365 | 0.003804 | 0 |
| chr5 | 83750001 | 83850000 | 621 | 831 | 83800000 | -0.22429 | 0.002556 | 0 |
| chr5 | 84150001 | 84250000 | 519 | 697 | 84200000 | -0.22946 | 0.002095 | 0 |
| chr5 | 84750001 | 84850000 | 565 | 738 | 84800000 | -0.18941 | 0.008901 | 0 |
| chr5 | 84800001 | 84900000 | 520 | 741 | 84850000 | -0.315   | 4.70E-05 | 0 |
| chr5 | 84850001 | 84950000 | 492 | 685 | 84900000 | -0.28148 | 0.000233 | 0 |
| chr5 | 85250001 | 85350000 | 546 | 723 | 85300000 | -0.20913 | 0.004484 | 0 |
| chr5 | 85300001 | 85400000 | 569 | 742 | 85350000 | -0.18703 | 0.009635 | 0 |
| chr5 | 87150001 | 87250000 | 617 | 810 | 87200000 | -0.19669 | 0.006952 | 0 |
| chr5 | 88300001 | 88400000 | 654 | 854 | 88350000 | -0.18898 | 0.009028 | 0 |
| chr5 | 88600001 | 88700000 | 606 | 811 | 88650000 | -0.22442 | 0.002543 | 0 |
| chr5 | 88650001 | 88750000 | 620 | 849 | 88700000 | -0.25753 | 0.00067  | 0 |

|      |          |          |     |      |          |          |          |   |
|------|----------|----------|-----|------|----------|----------|----------|---|
| chr5 | 88800001 | 88900000 | 642 | 844  | 88850000 | -0.19871 | 0.006484 | 0 |
| chr5 | 88900001 | 89000000 | 531 | 692  | 88950000 | -0.1861  | 0.009936 | 0 |
| chr5 | 89050001 | 89150000 | 597 | 791  | 89100000 | -0.20998 | 0.004348 | 0 |
| chr5 | 89750001 | 89850000 | 845 | 850  | 89800000 | 0.187452 | 0.008987 | 0 |
| chr5 | 89900001 | 90000000 | 682 | 890  | 89950000 | -0.18807 | 0.009307 | 0 |
| chr5 | 90350001 | 90450000 | 838 | 1096 | 90400000 | -0.19126 | 0.008363 | 0 |
| chr5 | 90600001 | 90700000 | 926 | 924  | 90650000 | 0.199082 | 0.005993 | 0 |
| chr5 | 91000001 | 91100000 | 630 | 855  | 91050000 | -0.24461 | 0.001147 | 0 |
| chr5 | 91600001 | 91700000 | 360 | 471  | 91650000 | -0.19177 | 0.008222 | 0 |
| chr5 | 96450001 | 96550000 | 911 | 917  | 96500000 | 0.186492 | 0.009284 | 0 |
| chr5 | 96500001 | 96600000 | 741 | 739  | 96550000 | 0.199862 | 0.005829 | 0 |
| chr5 | 96750001 | 96850000 | 663 | 899  | 96800000 | -0.24335 | 0.001207 | 0 |
| chr5 | 97000001 | 97100000 | 527 | 725  | 97050000 | -0.26421 | 0.000503 | 0 |
| chr5 | 97400001 | 97500000 | 514 | 677  | 97450000 | -0.20142 | 0.005898 | 0 |
| chr5 | 97850001 | 97950000 | 607 | 811  | 97900000 | -0.22204 | 0.002784 | 0 |
| chr5 | 98700001 | 98800000 | 342 | 462  | 98750000 | -0.23793 | 0.001501 | 0 |
| chr5 | 99600001 | 99700000 | 395 | 528  | 99650000 | -0.22272 | 0.002713 | 0 |
| chr5 | 99950001 | 1E+08    | 576 | 764  | 1.00E+08 | -0.21154 | 0.004109 | 0 |
| chr5 | 1E+08    | 1.01E+08 | 559 | 730  | 1E+08    | -0.18909 | 0.008997 | 0 |
| chr5 | 1.01E+08 | 1.01E+08 | 587 | 774  | 1.01E+08 | -0.20301 | 0.005578 | 0 |
| chr5 | 1.01E+08 | 1.01E+08 | 565 | 766  | 1.01E+08 | -0.24313 | 0.001218 | 0 |
| chr5 | 1.02E+08 | 1.02E+08 | 514 | 691  | 1.02E+08 | -0.23095 | 0.001977 | 0 |
| chr5 | 1.02E+08 | 1.02E+08 | 634 | 858  | 1.02E+08 | -0.24053 | 0.001353 | 0 |
| chr5 | 1.02E+08 | 1.02E+08 | 605 | 819  | 1.02E+08 | -0.24097 | 0.00133  | 0 |
| chr5 | 1.02E+08 | 1.02E+08 | 693 | 923  | 1.02E+08 | -0.21751 | 0.003299 | 0 |
| chr5 | 1.03E+08 | 1.03E+08 | 610 | 857  | 1.03E+08 | -0.29452 | 0.000127 | 0 |
| chr5 | 1.03E+08 | 1.03E+08 | 559 | 807  | 1.03E+08 | -0.33376 | 1.80E-05 | 0 |
| chr5 | 1.03E+08 | 1.03E+08 | 484 | 644  | 1.03E+08 | -0.21609 | 0.003477 | 0 |
| chr5 | 1.04E+08 | 1.04E+08 | 584 | 802  | 1.04E+08 | -0.26167 | 0.000561 | 0 |
| chr5 | 1.04E+08 | 1.04E+08 | 564 | 783  | 1.04E+08 | -0.27735 | 0.000281 | 0 |
| chr5 | 1.04E+08 | 1.04E+08 | 554 | 738  | 1.04E+08 | -0.21777 | 0.003267 | 0 |
| chr5 | 1.04E+08 | 1.04E+08 | 569 | 748  | 1.04E+08 | -0.19865 | 0.006498 | 0 |
| chr5 | 1.04E+08 | 1.04E+08 | 543 | 739  | 1.04E+08 | -0.24866 | 0.000971 | 0 |
| chr5 | 1.04E+08 | 1.05E+08 | 549 | 742  | 1.04E+08 | -0.23865 | 0.001459 | 0 |
| chr5 | 1.05E+08 | 1.05E+08 | 475 | 624  | 1.05E+08 | -0.19766 | 0.006724 | 0 |
| chr5 | 1.05E+08 | 1.05E+08 | 563 | 767  | 1.05E+08 | -0.25013 | 0.000914 | 0 |
| chr5 | 1.05E+08 | 1.05E+08 | 521 | 753  | 1.05E+08 | -0.3354  | 1.65E-05 | 0 |
| chr5 | 1.05E+08 | 1.05E+08 | 552 | 730  | 1.05E+08 | -0.20727 | 0.004795 | 0 |
| chr5 | 1.05E+08 | 1.05E+08 | 574 | 756  | 1.05E+08 | -0.20137 | 0.005909 | 0 |
| chr5 | 1.05E+08 | 1.06E+08 | 598 | 781  | 1.05E+08 | -0.18921 | 0.008959 | 0 |
| chr5 | 1.06E+08 | 1.06E+08 | 524 | 683  | 1.06E+08 | -0.18636 | 0.009851 | 0 |
| chr5 | 1.06E+08 | 1.06E+08 | 531 | 712  | 1.06E+08 | -0.2272  | 0.002286 | 0 |
| chr5 | 1.07E+08 | 1.07E+08 | 700 | 919  | 1.07E+08 | -0.19675 | 0.006938 | 0 |
| chr5 | 1.07E+08 | 1.07E+08 | 663 | 937  | 1.07E+08 | -0.30308 | 8.45E-05 | 0 |
| chr5 | 1.07E+08 | 1.07E+08 | 686 | 926  | 1.07E+08 | -0.23684 | 0.001568 | 0 |
| chr5 | 1.07E+08 | 1.07E+08 | 633 | 862  | 1.07E+08 | -0.24952 | 0.000937 | 0 |
| chr5 | 1.07E+08 | 1.07E+08 | 603 | 797  | 1.07E+08 | -0.20646 | 0.004936 | 0 |



|      |          |          |      |      |          |          |          |   |
|------|----------|----------|------|------|----------|----------|----------|---|
| chr5 | 1.09E+08 | 1.09E+08 | 665  | 898  | 1.09E+08 | -0.2374  | 0.001534 | 0 |
| chr5 | 1.12E+08 | 1.12E+08 | 838  | 836  | 1.12E+08 | 0.19941  | 0.005924 | 0 |
| chr5 | 1.13E+08 | 1.13E+08 | 620  | 811  | 1.13E+08 | -0.19147 | 0.008305 | 0 |
| chr5 | 1.14E+08 | 1.14E+08 | 553  | 738  | 1.14E+08 | -0.22038 | 0.002964 | 0 |
| chr5 | 1.14E+08 | 1.14E+08 | 547  | 740  | 1.14E+08 | -0.24002 | 0.001381 | 0 |
| chr5 | 1.14E+08 | 1.14E+08 | 626  | 816  | 1.14E+08 | -0.18644 | 0.009823 | 0 |
| chr5 | 1.14E+08 | 1.14E+08 | 479  | 635  | 1.14E+08 | -0.21077 | 0.004226 | 0 |
| chr5 | 1.14E+08 | 1.14E+08 | 612  | 806  | 1.14E+08 | -0.20129 | 0.005927 | 0 |
| chr5 | 1.15E+08 | 1.15E+08 | 703  | 1001 | 1.15E+08 | -0.31388 | 4.97E-05 | 0 |
| chr5 | 1.15E+08 | 1.15E+08 | 740  | 965  | 1.15E+08 | -0.18704 | 0.009631 | 0 |
| chr5 | 1.16E+08 | 1.16E+08 | 555  | 726  | 1.16E+08 | -0.19152 | 0.008292 | 0 |
| chr5 | 1.16E+08 | 1.16E+08 | 632  | 827  | 1.16E+08 | -0.192   | 0.008158 | 0 |
| chr5 | 1.16E+08 | 1.16E+08 | 591  | 784  | 1.16E+08 | -0.21173 | 0.004081 | 0 |
| chr5 | 1.17E+08 | 1.17E+08 | 606  | 814  | 1.17E+08 | -0.22975 | 0.002072 | 0 |
| chr5 | 1.18E+08 | 1.18E+08 | 565  | 764  | 1.18E+08 | -0.23936 | 0.001418 | 0 |
| chr5 | 1.19E+08 | 1.19E+08 | 594  | 857  | 1.19E+08 | -0.33287 | 1.89E-05 | 0 |
| chr5 | 1.19E+08 | 1.19E+08 | 598  | 859  | 1.19E+08 | -0.32655 | 2.62E-05 | 0 |
| chr5 | 1.2E+08  | 1.2E+08  | 578  | 763  | 1.2E+08  | -0.20465 | 0.005264 | 0 |
| chr5 | 1.2E+08  | 1.2E+08  | 557  | 759  | 1.2E+08  | -0.25046 | 0.000902 | 0 |
| chr5 | 1.21E+08 | 1.21E+08 | 557  | 728  | 1.21E+08 | -0.1903  | 0.008639 | 0 |
| chr5 | 1.21E+08 | 1.21E+08 | 585  | 771  | 1.21E+08 | -0.20233 | 0.005713 | 0 |
| chr5 | 1.23E+08 | 1.23E+08 | 784  | 1029 | 1.23E+08 | -0.19635 | 0.007033 | 0 |
| chr5 | 1.24E+08 | 1.24E+08 | 709  | 930  | 1.24E+08 | -0.19548 | 0.007247 | 0 |
| chr5 | 1.25E+08 | 1.25E+08 | 698  | 926  | 1.25E+08 | -0.21182 | 0.004067 | 0 |
| chr5 | 1.25E+08 | 1.25E+08 | 599  | 797  | 1.25E+08 | -0.21606 | 0.003481 | 0 |
| chr5 | 1.25E+08 | 1.25E+08 | 630  | 832  | 1.25E+08 | -0.20527 | 0.005149 | 0 |
| chr5 | 1.25E+08 | 1.25E+08 | 686  | 903  | 1.25E+08 | -0.20055 | 0.00608  | 0 |
| chr5 | 1.25E+08 | 1.25E+08 | 647  | 887  | 1.25E+08 | -0.25921 | 0.000624 | 0 |
| chr5 | 1.25E+08 | 1.25E+08 | 694  | 913  | 1.25E+08 | -0.19972 | 0.006261 | 0 |
| chr5 | 1.26E+08 | 1.26E+08 | 797  | 793  | 1.26E+08 | 0.203222 | 0.005165 | 0 |
| chr5 | 1.27E+08 | 1.27E+08 | 597  | 790  | 1.27E+08 | -0.20816 | 0.004644 | 0 |
| chr5 | 1.27E+08 | 1.27E+08 | 573  | 791  | 1.27E+08 | -0.26918 | 0.000405 | 0 |
| chr5 | 1.28E+08 | 1.28E+08 | 631  | 835  | 1.28E+08 | -0.20817 | 0.004642 | 0 |
| chr5 | 1.29E+08 | 1.29E+08 | 626  | 820  | 1.29E+08 | -0.1935  | 0.007754 | 0 |
| chr5 | 1.3E+08  | 1.3E+08  | 595  | 777  | 1.3E+08  | -0.18906 | 0.009004 | 0 |
| chr5 | 1.32E+08 | 1.32E+08 | 1188 | 1172 | 1.32E+08 | 0.215525 | 0.003272 | 0 |
| chr5 | 1.32E+08 | 1.32E+08 | 730  | 720  | 1.32E+08 | 0.215863 | 0.00323  | 0 |
| chr5 | 1.32E+08 | 1.32E+08 | 756  | 732  | 1.32E+08 | 0.242506 | 0.001115 | 0 |
| chr5 | 1.33E+08 | 1.33E+08 | 936  | 910  | 1.33E+08 | 0.236605 | 0.001423 | 0 |
| chr5 | 1.33E+08 | 1.33E+08 | 962  | 965  | 1.33E+08 | 0.191471 | 0.00783  | 0 |
| chr5 | 1.33E+08 | 1.34E+08 | 1085 | 1066 | 1.34E+08 | 0.221451 | 0.002606 | 0 |
| chr5 | 1.34E+08 | 1.34E+08 | 937  | 897  | 1.34E+08 | 0.258904 | 0.000551 | 0 |
| chr5 | 1.34E+08 | 1.34E+08 | 998  | 1002 | 1.34E+08 | 0.190192 | 0.008183 | 0 |
| chr5 | 1.34E+08 | 1.34E+08 | 1076 | 1037 | 1.34E+08 | 0.249225 | 0.000839 | 0 |
| chr5 | 1.34E+08 | 1.34E+08 | 791  | 790  | 1.34E+08 | 0.197788 | 0.006276 | 0 |
| chr5 | 1.34E+08 | 1.35E+08 | 1125 | 1121 | 1.34E+08 | 0.201102 | 0.005575 | 0 |
| chr5 | 1.35E+08 | 1.35E+08 | 1132 | 1119 | 1.35E+08 | 0.212627 | 0.00365  | 0 |

|      |          |          |      |      |          |          |          |   |
|------|----------|----------|------|------|----------|----------|----------|---|
| chr5 | 1.35E+08 | 1.35E+08 | 1133 | 1127 | 1.35E+08 | 0.203623 | 0.00509  | 0 |
| chr5 | 1.38E+08 | 1.38E+08 | 909  | 894  | 1.38E+08 | 0.219968 | 0.00276  | 0 |
| chr5 | 1.38E+08 | 1.38E+08 | 957  | 953  | 1.38E+08 | 0.202006 | 0.005397 | 0 |
| chr5 | 1.38E+08 | 1.38E+08 | 1043 | 1018 | 1.38E+08 | 0.230965 | 0.001789 | 0 |
| chr5 | 1.38E+08 | 1.38E+08 | 1317 | 1299 | 1.38E+08 | 0.215817 | 0.003235 | 0 |
| chr5 | 1.39E+08 | 1.39E+08 | 1241 | 1228 | 1.39E+08 | 0.211156 | 0.003857 | 0 |
| chr5 | 1.39E+08 | 1.39E+08 | 1374 | 1350 | 1.39E+08 | 0.221386 | 0.002612 | 0 |
| chr5 | 1.45E+08 | 1.45E+08 | 912  | 1239 | 1.45E+08 | -0.24611 | 0.001079 | 0 |
| chr5 | 1.45E+08 | 1.45E+08 | 875  | 1158 | 1.45E+08 | -0.20832 | 0.004618 | 0 |
| chr5 | 1.49E+08 | 1.49E+08 | 1521 | 1520 | 1.49E+08 | 0.196912 | 0.006473 | 0 |
| chr5 | 1.49E+08 | 1.49E+08 | 1343 | 1338 | 1.49E+08 | 0.201344 | 0.005527 | 0 |
| chr5 | 1.49E+08 | 1.49E+08 | 1186 | 1188 | 1.49E+08 | 0.193532 | 0.007289 | 0 |
| chr5 | 1.49E+08 | 1.49E+08 | 1302 | 1286 | 1.49E+08 | 0.213802 | 0.003492 | 0 |
| chr5 | 1.5E+08  | 1.5E+08  | 1370 | 1373 | 1.5E+08  | 0.192807 | 0.007475 | 0 |
| chr5 | 1.5E+08  | 1.5E+08  | 1530 | 1521 | 1.5E+08  | 0.204475 | 0.004935 | 0 |
| chr5 | 1.55E+08 | 1.55E+08 | 488  | 676  | 1.55E+08 | -0.27418 | 0.000324 | 0 |
| chr5 | 1.56E+08 | 1.56E+08 | 879  | 1156 | 1.56E+08 | -0.19924 | 0.006364 | 0 |
| chr5 | 1.56E+08 | 1.56E+08 | 896  | 1190 | 1.56E+08 | -0.21343 | 0.003836 | 0 |
| chr5 | 1.56E+08 | 1.56E+08 | 780  | 1041 | 1.56E+08 | -0.22046 | 0.002954 | 0 |
| chr5 | 1.6E+08  | 1.6E+08  | 908  | 1208 | 1.60E+08 | -0.21589 | 0.003503 | 0 |
| chr5 | 1.63E+08 | 1.63E+08 | 833  | 1104 | 1.63E+08 | -0.21039 | 0.004285 | 0 |
| chr5 | 1.63E+08 | 1.63E+08 | 808  | 1064 | 1.63E+08 | -0.20111 | 0.005964 | 0 |
| chr5 | 1.65E+08 | 1.66E+08 | 815  | 1068 | 1.66E+08 | -0.19408 | 0.007603 | 0 |
| chr5 | 1.66E+08 | 1.66E+08 | 872  | 1151 | 1.66E+08 | -0.20452 | 0.005287 | 0 |
| chr5 | 1.67E+08 | 1.67E+08 | 900  | 1183 | 1.67E+08 | -0.19849 | 0.006533 | 0 |
| chr5 | 1.71E+08 | 1.71E+08 | 1080 | 1068 | 1.71E+08 | 0.212083 | 0.003725 | 0 |
| chr5 | 1.71E+08 | 1.71E+08 | 1237 | 1226 | 1.71E+08 | 0.20885  | 0.004202 | 0 |
| chr5 | 1.72E+08 | 1.72E+08 | 1533 | 1511 | 1.72E+08 | 0.216817 | 0.003114 | 0 |
| chr5 | 1.72E+08 | 1.72E+08 | 1312 | 1318 | 1.72E+08 | 0.18938  | 0.008414 | 0 |
| chr5 | 1.72E+08 | 1.73E+08 | 1209 | 1144 | 1.72E+08 | 0.27569  | 0.000257 | 0 |
| chr5 | 1.72E+08 | 1.73E+08 | 1217 | 1194 | 1.73E+08 | 0.223489 | 0.002407 | 0 |
| chr5 | 1.73E+08 | 1.73E+08 | 1504 | 1497 | 1.73E+08 | 0.202693 | 0.005265 | 0 |
| chr5 | 1.75E+08 | 1.75E+08 | 62   | 56   | 1.75E+08 | 0.342804 | 8.26E-06 | 0 |
| chr5 | 1.76E+08 | 1.76E+08 | 1469 | 1469 | 1.76E+08 | 0.195963 | 0.006694 | 0 |
| chr5 | 1.76E+08 | 1.76E+08 | 1574 | 1551 | 1.76E+08 | 0.2172   | 0.003069 | 0 |
| chr5 | 1.76E+08 | 1.76E+08 | 1567 | 1558 | 1.76E+08 | 0.204273 | 0.004971 | 0 |
| chr5 | 1.76E+08 | 1.77E+08 | 1114 | 1123 | 1.76E+08 | 0.184354 | 0.009978 | 0 |
| chr5 | 1.77E+08 | 1.77E+08 | 1485 | 1491 | 1.77E+08 | 0.190146 | 0.008196 | 0 |
| chr5 | 1.77E+08 | 1.77E+08 | 1532 | 1521 | 1.77E+08 | 0.206359 | 0.004606 | 0 |
| chr5 | 1.77E+08 | 1.77E+08 | 1624 | 1452 | 1.77E+08 | 0.357473 | 3.58E-06 | 0 |
| chr5 | 1.77E+08 | 1.77E+08 | 1683 | 1494 | 1.77E+08 | 0.367818 | 1.95E-06 | 0 |
| chr5 | 1.77E+08 | 1.77E+08 | 1382 | 1340 | 1.77E+08 | 0.240488 | 0.001213 | 0 |
| chr5 | 1.77E+08 | 1.77E+08 | 769  | 698  | 1.77E+08 | 0.33572  | 1.22E-05 | 0 |
| chr5 | 1.77E+08 | 1.77E+08 | 62   | 61   | 1.77E+08 | 0.219422 | 0.002818 | 0 |
| chr5 | 1.77E+08 | 1.77E+08 | 18   | 16   | 1.77E+08 | 0.365888 | 2.19E-06 | 0 |
| chr5 | 1.78E+08 | 1.78E+08 | 1252 | 1250 | 1.78E+08 | 0.19827  | 0.006169 | 0 |
| chr5 | 1.78E+08 | 1.78E+08 | 1244 | 1235 | 1.78E+08 | 0.206438 | 0.004593 | 0 |

|      |          |          |      |      |          |          |          |   |
|------|----------|----------|------|------|----------|----------|----------|---|
| chr5 | 1.79E+08 | 1.79E+08 | 969  | 887  | 1.79E+08 | 0.323526 | 2.37E-05 | 0 |
| chr5 | 1.79E+08 | 1.79E+08 | 1164 | 1147 | 1.79E+08 | 0.217189 | 0.003071 | 0 |
| chr5 | 1.79E+08 | 1.79E+08 | 1400 | 1403 | 1.79E+08 | 0.192875 | 0.007458 | 0 |
| chr5 | 1.8E+08  | 1.8E+08  | 1445 | 1419 | 1.8E+08  | 0.222158 | 0.002535 | 0 |
| chr5 | 1.8E+08  | 1.8E+08  | 1164 | 1160 | 1.8E+08  | 0.200929 | 0.00561  | 0 |
| chr5 | 1.8E+08  | 1.8E+08  | 1204 | 1192 | 1.8E+08  | 0.210414 | 0.003965 | 0 |
| chr5 | 1.81E+08 | 1.81E+08 | 1312 | 1220 | 1.81E+08 | 0.30085  | 7.63E-05 | 0 |
| chr5 | 1.81E+08 | 1.81E+08 | 1326 | 1249 | 1.81E+08 | 0.28227  | 0.000189 | 0 |
| chr5 | 1.81E+08 | 1.81E+08 | 752  | 732  | 1.81E+08 | 0.234852 | 0.001529 | 0 |
| chr5 | 1.81E+08 | 1.81E+08 | 83   | 72   | 1.81E+08 | 0.401077 | 2.52E-07 | 0 |
| chr5 | 150001   | 250000   | 1978 | 2064 | 2.00E+05 | 0.134562 | 0.044628 | 0 |
| chr5 | 300001   | 400000   | 2463 | 2560 | 350000   | 0.140236 | 0.038285 | 0 |
| chr5 | 450001   | 550000   | 2824 | 2848 | 5.00E+05 | 0.183754 | 0.010181 | 0 |
| chr5 | 600001   | 700000   | 2178 | 2229 | 650000   | 0.16257  | 0.020052 | 0 |
| chr5 | 750001   | 850000   | 929  | 955  | 8.00E+05 | 0.156141 | 0.024328 | 0 |
| chr5 | 850001   | 950000   | 2413 | 2487 | 9.00E+05 | 0.152384 | 0.027163 | 0 |
| chr5 | 950001   | 1050000  | 2353 | 2460 | 1.00E+06 | 0.131806 | 0.048002 | 0 |
| chr5 | 1000001  | 1100000  | 2600 | 2695 | 1050000  | 0.144189 | 0.034316 | 0 |
| chr5 | 1050001  | 1150000  | 2819 | 2865 | 1100000  | 0.172611 | 0.014657 | 0 |
| chr5 | 1150001  | 1250000  | 3055 | 3121 | 1200000  | 0.165127 | 0.018539 | 0 |
| chr5 | 1200001  | 1300000  | 2861 | 2947 | 1250000  | 0.153235 | 0.026498 | 0 |
| chr5 | 1250001  | 1350000  | 2457 | 2511 | 1300000  | 0.164599 | 0.018843 | 0 |
| chr5 | 1550001  | 1650000  | 1188 | 1200 | 1600000  | 0.181463 | 0.010989 | 0 |
| chr5 | 1600001  | 1700000  | 1706 | 1722 | 1650000  | 0.182496 | 0.010618 | 0 |
| chr5 | 1750001  | 1850000  | 2662 | 2774 | 1800000  | 0.136506 | 0.042366 | 0 |
| chr5 | 1800001  | 1900000  | 2745 | 2810 | 1850000  | 0.162199 | 0.02028  | 0 |
| chr5 | 3000001  | 3100000  | 1776 | 2256 | 3050000  | -0.14917 | 0.030701 | 0 |
| chr5 | 4400001  | 4500000  | 1502 | 1891 | 4450000  | -0.1363  | 0.043603 | 0 |
| chr5 | 4500001  | 4600000  | 1532 | 1975 | 4550000  | -0.17047 | 0.016372 | 0 |
| chr5 | 4550001  | 4650000  | 1467 | 1898 | 4600000  | -0.17565 | 0.013926 | 0 |
| chr5 | 4750001  | 4850000  | 1489 | 1937 | 4800000  | -0.18352 | 0.010814 | 0 |
| chr5 | 4800001  | 4900000  | 1596 | 2071 | 4850000  | -0.1799  | 0.012158 | 0 |
| chr5 | 4950001  | 5050000  | 1614 | 2050 | 5.00E+06 | -0.14902 | 0.030833 | 0 |
| chr5 | 6850001  | 6950000  | 1869 | 2368 | 6900000  | -0.14544 | 0.034066 | 0 |
| chr5 | 6900001  | 7000000  | 1654 | 2111 | 6950000  | -0.156   | 0.025259 | 0 |
| chr5 | 7250001  | 7350000  | 1116 | 1406 | 7300000  | -0.1373  | 0.042469 | 0 |
| chr5 | 7300001  | 7400000  | 1463 | 1852 | 7350000  | -0.14419 | 0.035257 | 0 |
| chr5 | 7350001  | 7450000  | 1692 | 2181 | 7400000  | -0.1703  | 0.016462 | 0 |
| chr5 | 7550001  | 7650000  | 1653 | 2128 | 7600000  | -0.16845 | 0.017426 | 0 |
| chr5 | 8500001  | 8600000  | 1655 | 2084 | 8550000  | -0.13656 | 0.043305 | 0 |
| chr5 | 8550001  | 8650000  | 1610 | 2036 | 8600000  | -0.14271 | 0.036711 | 0 |
| chr5 | 8800001  | 8900000  | 1594 | 2070 | 8850000  | -0.18102 | 0.01173  | 0 |
| chr5 | 8850001  | 8950000  | 1538 | 1957 | 8900000  | -0.15163 | 0.028645 | 0 |
| chr5 | 8950001  | 9050000  | 1405 | 1765 | 9.00E+06 | -0.13314 | 0.047375 | 0 |
| chr5 | 9100001  | 9200000  | 1600 | 2011 | 9150000  | -0.13388 | 0.046467 | 0 |
| chr5 | 9250001  | 9350000  | 1506 | 1891 | 9300000  | -0.13246 | 0.048207 | 0 |
| chr5 | 9600001  | 9700000  | 1612 | 2028 | 9650000  | -0.13524 | 0.044836 | 0 |

|      |          |          |      |      |          |          |          |   |
|------|----------|----------|------|------|----------|----------|----------|---|
| chr5 | 9800001  | 9900000  | 1762 | 2230 | 9850000  | -0.14387 | 0.035572 | 0 |
| chr5 | 10050001 | 10150000 | 1902 | 2398 | 10100000 | -0.13835 | 0.041294 | 0 |
| chr5 | 10250001 | 10350000 | 2362 | 2399 | 10300000 | 0.173539 | 0.014229 | 0 |
| chr5 | 10500001 | 10600000 | 2394 | 2482 | 10550000 | 0.143883 | 0.034611 | 0 |
| chr5 | 11200001 | 11300000 | 1730 | 2176 | 11250000 | -0.13494 | 0.04519  | 0 |
| chr5 | 11450001 | 11550000 | 1617 | 2095 | 11500000 | -0.17767 | 0.013061 | 0 |
| chr5 | 11550001 | 11650000 | 1619 | 2037 | 11600000 | -0.13538 | 0.044675 | 0 |
| chr5 | 11650001 | 11750000 | 1510 | 1913 | 11700000 | -0.14533 | 0.034173 | 0 |
| chr5 | 11700001 | 11800000 | 1578 | 2012 | 11750000 | -0.15457 | 0.026329 | 0 |
| chr5 | 11750001 | 11850000 | 1540 | 1956 | 11800000 | -0.14901 | 0.030839 | 0 |
| chr5 | 12150001 | 12250000 | 1407 | 1784 | 12200000 | -0.14653 | 0.033053 | 0 |
| chr5 | 12250001 | 12350000 | 1479 | 1909 | 12300000 | -0.17223 | 0.015502 | 0 |
| chr5 | 12450001 | 12550000 | 1417 | 1805 | 12500000 | -0.1532  | 0.027389 | 0 |
| chr5 | 12500001 | 12600000 | 1406 | 1803 | 12550000 | -0.16284 | 0.020652 | 0 |
| chr5 | 12850001 | 12950000 | 1547 | 1972 | 12900000 | -0.15422 | 0.026593 | 0 |
| chr5 | 13050001 | 13150000 | 1511 | 1925 | 13100000 | -0.15339 | 0.027236 | 0 |
| chr5 | 13650001 | 13750000 | 1668 | 2093 | 13700000 | -0.13149 | 0.049436 | 0 |
| chr5 | 15100001 | 15200000 | 1735 | 2190 | 15150000 | -0.14003 | 0.039476 | 0 |
| chr5 | 16350001 | 16450000 | 1689 | 2150 | 16400000 | -0.1522  | 0.028176 | 0 |
| chr5 | 16850001 | 16950000 | 2169 | 2250 | 16900000 | 0.143068 | 0.035406 | 0 |
| chr5 | 16900001 | 17000000 | 1957 | 1978 | 16950000 | 0.180564 | 0.011321 | 0 |
| chr5 | 17500001 | 17600000 | 171  | 177  | 17550000 | 0.14621  | 0.032422 | 0 |
| chr5 | 18450001 | 18550000 | 1217 | 1532 | 18500000 | -0.13612 | 0.043808 | 0 |
| chr5 | 18550001 | 18650000 | 1356 | 1701 | 18600000 | -0.13106 | 0.049983 | 0 |
| chr5 | 18600001 | 18700000 | 1200 | 1547 | 18650000 | -0.17048 | 0.016371 | 0 |
| chr5 | 18650001 | 18750000 | 1193 | 1498 | 18700000 | -0.13248 | 0.048187 | 0 |
| chr5 | 19150001 | 19250000 | 1145 | 1447 | 19200000 | -0.14175 | 0.037681 | 0 |
| chr5 | 19200001 | 19300000 | 1243 | 1566 | 19250000 | -0.13729 | 0.042471 | 0 |
| chr5 | 19250001 | 19350000 | 1211 | 1577 | 19300000 | -0.18502 | 0.010294 | 0 |
| chr5 | 19300001 | 19400000 | 1238 | 1605 | 19350000 | -0.1786  | 0.012678 | 0 |
| chr5 | 19350001 | 19450000 | 1242 | 1583 | 19400000 | -0.15403 | 0.026739 | 0 |
| chr5 | 19500001 | 19600000 | 1137 | 1449 | 19550000 | -0.15386 | 0.026871 | 0 |
| chr5 | 19800001 | 19900000 | 1176 | 1501 | 19850000 | -0.15607 | 0.025209 | 0 |
| chr5 | 19900001 | 20000000 | 1279 | 1627 | 19950000 | -0.15123 | 0.028964 | 0 |
| chr5 | 19950001 | 20050000 | 1199 | 1509 | 2.00E+07 | -0.1358  | 0.044186 | 0 |
| chr5 | 20300001 | 20400000 | 1124 | 1416 | 20350000 | -0.13722 | 0.04256  | 0 |
| chr5 | 20850001 | 20950000 | 202  | 260  | 20900000 | -0.16819 | 0.017563 | 0 |
| chr5 | 20950001 | 21050000 | 1244 | 1582 | 2.10E+07 | -0.1508  | 0.029323 | 0 |
| chr5 | 21000001 | 21100000 | 1285 | 1630 | 21050000 | -0.14714 | 0.032497 | 0 |
| chr5 | 21550001 | 21650000 | 1417 | 1787 | 21600000 | -0.13874 | 0.040871 | 0 |
| chr5 | 21600001 | 21700000 | 1194 | 1536 | 21650000 | -0.16741 | 0.017987 | 0 |
| chr5 | 21650001 | 21750000 | 1215 | 1572 | 21700000 | -0.17568 | 0.013911 | 0 |
| chr5 | 21700001 | 21800000 | 1264 | 1635 | 21750000 | -0.17533 | 0.014066 | 0 |
| chr5 | 21750001 | 21850000 | 1266 | 1597 | 21800000 | -0.13912 | 0.04045  | 0 |
| chr5 | 21800001 | 21900000 | 1197 | 1526 | 21850000 | -0.15437 | 0.026482 | 0 |
| chr5 | 21950001 | 22050000 | 529  | 677  | 2.20E+07 | -0.15993 | 0.022521 | 0 |
| chr5 | 22250001 | 22350000 | 1163 | 1459 | 22300000 | -0.13117 | 0.049851 | 0 |

|      |          |          |      |      |          |          |          |   |
|------|----------|----------|------|------|----------|----------|----------|---|
| chr5 | 22400001 | 22500000 | 1235 | 1594 | 22450000 | -0.17218 | 0.015529 | 0 |
| chr5 | 22550001 | 22650000 | 1296 | 1653 | 22600000 | -0.15506 | 0.025961 | 0 |
| chr5 | 22950001 | 23050000 | 1226 | 1548 | 2.30E+07 | -0.14048 | 0.038999 | 0 |
| chr5 | 23000001 | 23100000 | 1188 | 1545 | 23050000 | -0.18311 | 0.010959 | 0 |
| chr5 | 23150001 | 23250000 | 1226 | 1555 | 23200000 | -0.14699 | 0.032631 | 0 |
| chr5 | 23350001 | 23450000 | 1201 | 1531 | 23400000 | -0.15428 | 0.026554 | 0 |
| chr5 | 23400001 | 23500000 | 1279 | 1635 | 23450000 | -0.15831 | 0.023616 | 0 |
| chr5 | 23950001 | 24050000 | 1283 | 1640 | 2.40E+07 | -0.15821 | 0.023685 | 0 |
| chr5 | 24000001 | 24100000 | 1327 | 1678 | 24050000 | -0.14261 | 0.036813 | 0 |
| chr5 | 24200001 | 24300000 | 1314 | 1699 | 24250000 | -0.17476 | 0.014323 | 0 |
| chr5 | 24250001 | 24350000 | 1271 | 1650 | 24300000 | -0.18054 | 0.011912 | 0 |
| chr5 | 24300001 | 24400000 | 1158 | 1471 | 24350000 | -0.1492  | 0.030678 | 0 |
| chr5 | 24450001 | 24550000 | 1348 | 1699 | 24500000 | -0.1379  | 0.041791 | 0 |
| chr5 | 24550001 | 24650000 | 1430 | 1800 | 24600000 | -0.13602 | 0.04393  | 0 |
| chr5 | 24600001 | 24700000 | 1380 | 1732 | 24650000 | -0.13181 | 0.049033 | 0 |
| chr5 | 24850001 | 24950000 | 1486 | 1925 | 24900000 | -0.17746 | 0.013147 | 0 |
| chr5 | 25050001 | 25150000 | 1200 | 1523 | 25100000 | -0.14792 | 0.031799 | 0 |
| chr5 | 25100001 | 25200000 | 1179 | 1491 | 25150000 | -0.14275 | 0.036671 | 0 |
| chr5 | 25400001 | 25500000 | 1262 | 1597 | 25450000 | -0.14369 | 0.035745 | 0 |
| chr5 | 25550001 | 25650000 | 1330 | 1689 | 25600000 | -0.14878 | 0.031041 | 0 |
| chr5 | 26550001 | 26650000 | 1320 | 1665 | 26600000 | -0.13902 | 0.040561 | 0 |
| chr5 | 26600001 | 26700000 | 1382 | 1752 | 26650000 | -0.14628 | 0.033281 | 0 |
| chr5 | 26650001 | 26750000 | 1352 | 1706 | 26700000 | -0.13956 | 0.03998  | 0 |
| chr5 | 26700001 | 26800000 | 1288 | 1635 | 26750000 | -0.1482  | 0.031554 | 0 |
| chr5 | 26800001 | 26900000 | 1303 | 1680 | 26850000 | -0.17066 | 0.016278 | 0 |
| chr5 | 27550001 | 27650000 | 1246 | 1593 | 27600000 | -0.15848 | 0.0235   | 0 |
| chr5 | 27600001 | 27700000 | 1207 | 1528 | 27650000 | -0.14426 | 0.035194 | 0 |
| chr5 | 27650001 | 27750000 | 1258 | 1592 | 27700000 | -0.14375 | 0.035691 | 0 |
| chr5 | 27700001 | 27800000 | 1287 | 1627 | 27750000 | -0.14224 | 0.037188 | 0 |
| chr5 | 28000001 | 28100000 | 1183 | 1538 | 28050000 | -0.18264 | 0.011127 | 0 |
| chr5 | 28300001 | 28400000 | 1329 | 1674 | 28350000 | -0.137   | 0.04281  | 0 |
| chr5 | 28350001 | 28450000 | 1322 | 1662 | 28400000 | -0.13424 | 0.046036 | 0 |
| chr5 | 29250001 | 29350000 | 1346 | 1716 | 29300000 | -0.15441 | 0.026452 | 0 |
| chr5 | 30250001 | 30350000 | 1346 | 1691 | 30300000 | -0.13324 | 0.047252 | 0 |
| chr5 | 30850001 | 30950000 | 1338 | 1704 | 30900000 | -0.15288 | 0.027635 | 0 |
| chr5 | 30900001 | 31000000 | 1278 | 1608 | 30950000 | -0.13542 | 0.044632 | 0 |
| chr5 | 31000001 | 31100000 | 1308 | 1704 | 31050000 | -0.1856  | 0.0101   | 0 |
| chr5 | 31450001 | 31550000 | 1795 | 1878 | 31500000 | 0.13075  | 0.049348 | 0 |
| chr5 | 33000001 | 33100000 | 1441 | 1815 | 33050000 | -0.13694 | 0.042877 | 0 |
| chr5 | 34100001 | 34200000 | 134  | 140  | 34150000 | 0.132769 | 0.046801 | 0 |
| chr5 | 35500001 | 35600000 | 1080 | 1359 | 35550000 | -0.13555 | 0.044474 | 0 |
| chr5 | 36500001 | 36600000 | 1161 | 1481 | 36550000 | -0.15524 | 0.025824 | 0 |
| chr5 | 37900001 | 38000000 | 1356 | 1702 | 37950000 | -0.13191 | 0.048902 | 0 |
| chr5 | 39500001 | 39600000 | 1286 | 1619 | 39550000 | -0.13625 | 0.043663 | 0 |
| chr5 | 40050001 | 40150000 | 1118 | 1443 | 40100000 | -0.17219 | 0.015524 | 0 |
| chr5 | 40100001 | 40200000 | 1078 | 1363 | 40150000 | -0.14247 | 0.03696  | 0 |
| chr5 | 40150001 | 40250000 | 1152 | 1478 | 40200000 | -0.16354 | 0.020222 | 0 |

|      |          |          |      |      |          |          |          |   |
|------|----------|----------|------|------|----------|----------|----------|---|
| chr5 | 40550001 | 40650000 | 1125 | 1427 | 40600000 | -0.1471  | 0.032536 | 0 |
| chr5 | 41000001 | 41100000 | 1147 | 1448 | 41050000 | -0.14023 | 0.039263 | 0 |
| chr5 | 41050001 | 41150000 | 1123 | 1435 | 41100000 | -0.15773 | 0.024022 | 0 |
| chr5 | 41150001 | 41250000 | 1110 | 1393 | 41200000 | -0.13167 | 0.049204 | 0 |
| chr5 | 42000001 | 42100000 | 1107 | 1397 | 42050000 | -0.13971 | 0.039815 | 0 |
| chr5 | 42150001 | 42250000 | 1155 | 1481 | 42200000 | -0.16272 | 0.020729 | 0 |
| chr5 | 42200001 | 42300000 | 1106 | 1400 | 42250000 | -0.14411 | 0.035333 | 0 |
| chr5 | 42250001 | 42350000 | 1043 | 1333 | 42300000 | -0.15797 | 0.02385  | 0 |
| chr5 | 42700001 | 42800000 | 1171 | 1473 | 42750000 | -0.13505 | 0.04506  | 0 |
| chr5 | 43000001 | 43100000 | 1386 | 1403 | 43050000 | 0.178375 | 0.012166 | 0 |
| chr5 | 43100001 | 43200000 | 1410 | 1437 | 43150000 | 0.168598 | 0.016641 | 0 |
| chr5 | 44200001 | 44300000 | 1117 | 1433 | 44250000 | -0.16345 | 0.02028  | 0 |
| chr5 | 44650001 | 44750000 | 1054 | 1356 | 44700000 | -0.16752 | 0.017928 | 0 |
| chr5 | 44700001 | 44800000 | 1071 | 1347 | 44750000 | -0.13483 | 0.045326 | 0 |
| chr5 | 45000001 | 45100000 | 1057 | 1376 | 45050000 | -0.18454 | 0.010457 | 0 |
| chr5 | 45050001 | 45150000 | 1021 | 1294 | 45100000 | -0.14589 | 0.033643 | 0 |
| chr5 | 45700001 | 45800000 | 933  | 1178 | 45750000 | -0.14043 | 0.039058 | 0 |
| chr5 | 45800001 | 45900000 | 872  | 1105 | 45850000 | -0.14568 | 0.033837 | 0 |
| chr5 | 45900001 | 46000000 | 856  | 1091 | 45950000 | -0.15401 | 0.02676  | 0 |
| chr5 | 46100001 | 46200000 | 795  | 1006 | 46150000 | -0.14364 | 0.035793 | 0 |
| chr5 | 49600001 | 49700000 | 243  | 305  | 49650000 | -0.13189 | 0.048929 | 0 |
| chr5 | 49850001 | 49950000 | 220  | 278  | 49900000 | -0.14162 | 0.03782  | 0 |
| chr5 | 50300001 | 50400000 | 400  | 512  | 50350000 | -0.16018 | 0.022351 | 0 |
| chr5 | 50900001 | 51000000 | 367  | 476  | 50950000 | -0.17922 | 0.012429 | 0 |
| chr5 | 51450001 | 51550000 | 431  | 447  | 51500000 | 0.143376 | 0.035104 | 0 |
| chr5 | 51500001 | 51600000 | 417  | 543  | 51550000 | -0.18494 | 0.010321 | 0 |
| chr5 | 51600001 | 51700000 | 410  | 519  | 51650000 | -0.14415 | 0.035299 | 0 |
| chr5 | 51650001 | 51750000 | 458  | 580  | 51700000 | -0.14474 | 0.034727 | 0 |
| chr5 | 51800001 | 51900000 | 445  | 559  | 51850000 | -0.13308 | 0.047443 | 0 |
| chr5 | 51850001 | 51950000 | 462  | 582  | 51900000 | -0.13716 | 0.04262  | 0 |
| chr5 | 52500001 | 52600000 | 448  | 579  | 52550000 | -0.1741  | 0.014622 | 0 |
| chr5 | 52550001 | 52650000 | 495  | 628  | 52600000 | -0.14737 | 0.032287 | 0 |
| chr5 | 52900001 | 53000000 | 434  | 564  | 52950000 | -0.18204 | 0.011348 | 0 |
| chr5 | 53100001 | 53200000 | 427  | 542  | 53150000 | -0.14809 | 0.031644 | 0 |
| chr5 | 53650001 | 53750000 | 450  | 570  | 53700000 | -0.14507 | 0.034411 | 0 |
| chr5 | 53900001 | 54000000 | 504  | 648  | 53950000 | -0.16661 | 0.018434 | 0 |
| chr5 | 54350001 | 54450000 | 484  | 615  | 54400000 | -0.14962 | 0.03032  | 0 |
| chr5 | 55150001 | 55250000 | 587  | 614  | 55200000 | 0.131085 | 0.048918 | 0 |
| chr5 | 55200001 | 55300000 | 591  | 618  | 55250000 | 0.131514 | 0.048371 | 0 |
| chr5 | 56150001 | 56250000 | 626  | 643  | 56200000 | 0.157307 | 0.0235   | 0 |
| chr5 | 56400001 | 56500000 | 509  | 515  | 56450000 | 0.179056 | 0.011897 | 0 |
| chr5 | 56550001 | 56650000 | 481  | 608  | 56600000 | -0.14207 | 0.037358 | 0 |
| chr5 | 56600001 | 56700000 | 458  | 577  | 56650000 | -0.13726 | 0.04251  | 0 |
| chr5 | 56750001 | 56850000 | 454  | 581  | 56800000 | -0.15988 | 0.022549 | 0 |
| chr5 | 56850001 | 56950000 | 540  | 700  | 56900000 | -0.17843 | 0.012746 | 0 |
| chr5 | 58350001 | 58450000 | 1012 | 1053 | 58400000 | 0.138667 | 0.039961 | 0 |
| chr5 | 58600001 | 58700000 | 935  | 973  | 58650000 | 0.13849  | 0.040154 | 0 |

|      |          |          |      |      |          |          |          |   |
|------|----------|----------|------|------|----------|----------|----------|---|
| chr5 | 58750001 | 58850000 | 989  | 1005 | 58800000 | 0.17281  | 0.014564 | 0 |
| chr5 | 59000001 | 59100000 | 1051 | 1085 | 59050000 | 0.150031 | 0.029077 | 0 |
| chr5 | 59300001 | 59400000 | 700  | 886  | 59350000 | -0.14399 | 0.035453 | 0 |
| chr5 | 59350001 | 59450000 | 751  | 947  | 59400000 | -0.13859 | 0.041033 | 0 |
| chr5 | 61350001 | 61450000 | 728  | 937  | 61400000 | -0.16815 | 0.017587 | 0 |
| chr5 | 61650001 | 61750000 | 797  | 833  | 61700000 | 0.132226 | 0.047475 | 0 |
| chr5 | 61700001 | 61800000 | 756  | 784  | 61750000 | 0.143496 | 0.034987 | 0 |
| chr5 | 62050001 | 62150000 | 556  | 702  | 62100000 | -0.14042 | 0.039062 | 0 |
| chr5 | 62150001 | 62250000 | 584  | 745  | 62200000 | -0.15531 | 0.025773 | 0 |
| chr5 | 62200001 | 62300000 | 650  | 820  | 62250000 | -0.13922 | 0.040344 | 0 |
| chr5 | 62550001 | 62650000 | 578  | 747  | 62600000 | -0.17408 | 0.014634 | 0 |
| chr5 | 62650001 | 62750000 | 591  | 769  | 62700000 | -0.18386 | 0.010693 | 0 |
| chr5 | 63600001 | 63700000 | 625  | 788  | 63650000 | -0.13838 | 0.041266 | 0 |
| chr5 | 63650001 | 63750000 | 590  | 759  | 63700000 | -0.16742 | 0.017982 | 0 |
| chr5 | 63750001 | 63850000 | 617  | 803  | 63800000 | -0.18417 | 0.010587 | 0 |
| chr5 | 63800001 | 63900000 | 777  | 982  | 63850000 | -0.14185 | 0.037588 | 0 |
| chr5 | 63850001 | 63950000 | 769  | 970  | 63900000 | -0.13904 | 0.040543 | 0 |
| chr5 | 63950001 | 64050000 | 724  | 910  | 6.40E+07 | -0.13391 | 0.046424 | 0 |
| chr5 | 64300001 | 64400000 | 894  | 934  | 64350000 | 0.132815 | 0.046744 | 0 |
| chr5 | 64650001 | 64750000 | 666  | 858  | 64700000 | -0.16949 | 0.016876 | 0 |
| chr5 | 65700001 | 65800000 | 693  | 886  | 65750000 | -0.15849 | 0.023494 | 0 |
| chr5 | 65750001 | 65850000 | 736  | 941  | 65800000 | -0.15853 | 0.023468 | 0 |
| chr5 | 66700001 | 66800000 | 659  | 853  | 66750000 | -0.1763  | 0.01364  | 0 |
| chr5 | 67250001 | 67350000 | 646  | 822  | 67300000 | -0.15164 | 0.028632 | 0 |
| chr5 | 67300001 | 67400000 | 633  | 800  | 67350000 | -0.14183 | 0.037602 | 0 |
| chr5 | 67350001 | 67450000 | 616  | 782  | 67400000 | -0.14828 | 0.031483 | 0 |
| chr5 | 67800001 | 67900000 | 746  | 965  | 67850000 | -0.17539 | 0.01404  | 0 |
| chr5 | 68150001 | 68250000 | 721  | 916  | 68200000 | -0.14939 | 0.030518 | 0 |
| chr5 | 68200001 | 68300000 | 766  | 972  | 68250000 | -0.14765 | 0.032039 | 0 |
| chr5 | 70700001 | 70800000 | 464  | 477  | 70750000 | 0.156099 | 0.024358 | 0 |
| chr5 | 70750001 | 70850000 | 762  | 787  | 70800000 | 0.14939  | 0.029617 | 0 |
| chr5 | 70800001 | 70900000 | 734  | 768  | 70850000 | 0.130637 | 0.049494 | 0 |
| chr5 | 70850001 | 70950000 | 756  | 788  | 70900000 | 0.136154 | 0.042769 | 0 |
| chr5 | 70900001 | 71000000 | 779  | 813  | 70950000 | 0.134331 | 0.044904 | 0 |
| chr5 | 71400001 | 71500000 | 1013 | 1032 | 71450000 | 0.169154 | 0.016353 | 0 |
| chr5 | 71550001 | 71650000 | 900  | 940  | 71600000 | 0.133227 | 0.046238 | 0 |
| chr5 | 71950001 | 72050000 | 691  | 867  | 7.20E+07 | -0.13138 | 0.049572 | 0 |
| chr5 | 72050001 | 72150000 | 898  | 937  | 72100000 | 0.134629 | 0.044549 | 0 |
| chr5 | 72600001 | 72700000 | 811  | 1037 | 72650000 | -0.15868 | 0.023363 | 0 |
| chr5 | 72850001 | 72950000 | 911  | 938  | 72900000 | 0.153826 | 0.026044 | 0 |
| chr5 | 73350001 | 73450000 | 707  | 919  | 73400000 | -0.18239 | 0.011218 | 0 |
| chr5 | 73500001 | 73600000 | 728  | 915  | 73550000 | -0.13387 | 0.046477 | 0 |
| chr5 | 73750001 | 73850000 | 662  | 850  | 73800000 | -0.16467 | 0.019548 | 0 |
| chr5 | 73800001 | 73900000 | 682  | 868  | 73850000 | -0.15196 | 0.028373 | 0 |
| chr5 | 74150001 | 74250000 | 625  | 789  | 74200000 | -0.14021 | 0.039291 | 0 |
| chr5 | 74850001 | 74950000 | 686  | 863  | 74900000 | -0.13519 | 0.0449   | 0 |
| chr5 | 75150001 | 75250000 | 640  | 805  | 75200000 | -0.13495 | 0.045177 | 0 |

|      |          |          |     |      |          |          |          |   |
|------|----------|----------|-----|------|----------|----------|----------|---|
| chr5 | 75200001 | 75300000 | 611 | 788  | 75250000 | -0.17106 | 0.016078 | 0 |
| chr5 | 75700001 | 75800000 | 692 | 879  | 75750000 | -0.14913 | 0.030739 | 0 |
| chr5 | 75750001 | 75850000 | 723 | 928  | 75800000 | -0.16417 | 0.019846 | 0 |
| chr5 | 77150001 | 77250000 | 749 | 960  | 77200000 | -0.16211 | 0.02111  | 0 |
| chr5 | 78900001 | 79000000 | 796 | 819  | 78950000 | 0.154868 | 0.025259 | 0 |
| chr5 | 79000001 | 79100000 | 639 | 816  | 79050000 | -0.15679 | 0.024689 | 0 |
| chr5 | 79400001 | 79500000 | 717 | 925  | 79450000 | -0.17152 | 0.015851 | 0 |
| chr5 | 79450001 | 79550000 | 678 | 860  | 79500000 | -0.14709 | 0.032544 | 0 |
| chr5 | 79700001 | 79800000 | 742 | 753  | 79750000 | 0.174732 | 0.013693 | 0 |
| chr5 | 80000001 | 80100000 | 740 | 941  | 80050000 | -0.15071 | 0.029401 | 0 |
| chr5 | 80050001 | 80150000 | 680 | 863  | 80100000 | -0.14786 | 0.031849 | 0 |
| chr5 | 80900001 | 81000000 | 598 | 759  | 80950000 | -0.14799 | 0.031734 | 0 |
| chr5 | 81150001 | 81250000 | 791 | 821  | 81200000 | 0.142259 | 0.03621  | 0 |
| chr5 | 81750001 | 81850000 | 684 | 859  | 81800000 | -0.1327  | 0.047915 | 0 |
| chr5 | 82650001 | 82750000 | 696 | 876  | 82700000 | -0.13588 | 0.04409  | 0 |
| chr5 | 82800001 | 82900000 | 662 | 861  | 82850000 | -0.18322 | 0.01092  | 0 |
| chr5 | 83550001 | 83650000 | 633 | 821  | 83600000 | -0.17921 | 0.012431 | 0 |
| chr5 | 83800001 | 83900000 | 647 | 826  | 83850000 | -0.15641 | 0.024961 | 0 |
| chr5 | 84200001 | 84300000 | 514 | 659  | 84250000 | -0.16255 | 0.020834 | 0 |
| chr5 | 84250001 | 84350000 | 566 | 730  | 84300000 | -0.17113 | 0.016042 | 0 |
| chr5 | 84300001 | 84400000 | 577 | 739  | 84350000 | -0.16104 | 0.02179  | 0 |
| chr5 | 84900001 | 85000000 | 520 | 665  | 84950000 | -0.15888 | 0.023225 | 0 |
| chr5 | 85600001 | 85700000 | 593 | 755  | 85650000 | -0.15248 | 0.027954 | 0 |
| chr5 | 85650001 | 85750000 | 583 | 734  | 85700000 | -0.13632 | 0.04358  | 0 |
| chr5 | 85700001 | 85800000 | 585 | 743  | 85750000 | -0.14896 | 0.030883 | 0 |
| chr5 | 85950001 | 86050000 | 604 | 783  | 8.60E+07 | -0.1785  | 0.012718 | 0 |
| chr5 | 86000001 | 86100000 | 594 | 772  | 86050000 | -0.18217 | 0.011298 | 0 |
| chr5 | 86100001 | 86200000 | 728 | 943  | 86150000 | -0.17736 | 0.013191 | 0 |
| chr5 | 86150001 | 86250000 | 706 | 912  | 86200000 | -0.1734  | 0.014946 | 0 |
| chr5 | 86200001 | 86300000 | 632 | 816  | 86250000 | -0.17268 | 0.015287 | 0 |
| chr5 | 86250001 | 86350000 | 601 | 772  | 86300000 | -0.16527 | 0.019195 | 0 |
| chr5 | 86400001 | 86500000 | 748 | 758  | 86450000 | 0.176803 | 0.012806 | 0 |
| chr5 | 86550001 | 86650000 | 854 | 874  | 86600000 | 0.162566 | 0.020055 | 0 |
| chr5 | 87050001 | 87150000 | 747 | 769  | 87100000 | 0.154088 | 0.025845 | 0 |
| chr5 | 87650001 | 87750000 | 696 | 891  | 87700000 | -0.16038 | 0.022223 | 0 |
| chr5 | 88200001 | 88300000 | 552 | 709  | 88250000 | -0.16515 | 0.019264 | 0 |
| chr5 | 88700001 | 88800000 | 664 | 837  | 88750000 | -0.13808 | 0.041592 | 0 |
| chr5 | 88750001 | 88850000 | 651 | 848  | 88800000 | -0.18544 | 0.010152 | 0 |
| chr5 | 88850001 | 88950000 | 575 | 726  | 88900000 | -0.14044 | 0.03904  | 0 |
| chr5 | 88950001 | 89050000 | 591 | 753  | 8.90E+07 | -0.15353 | 0.027129 | 0 |
| chr5 | 89100001 | 89200000 | 650 | 831  | 89150000 | -0.15845 | 0.023523 | 0 |
| chr5 | 89950001 | 90050000 | 713 | 909  | 9.00E+07 | -0.15442 | 0.026447 | 0 |
| chr5 | 90100001 | 90200000 | 755 | 951  | 90150000 | -0.13701 | 0.042798 | 0 |
| chr5 | 90150001 | 90250000 | 796 | 1018 | 90200000 | -0.15893 | 0.023188 | 0 |
| chr5 | 90550001 | 90650000 | 891 | 918  | 90600000 | 0.152894 | 0.026763 | 0 |
| chr5 | 90950001 | 91050000 | 676 | 873  | 9.10E+07 | -0.173   | 0.015137 | 0 |
| chr5 | 91050001 | 91150000 | 650 | 842  | 91100000 | -0.17742 | 0.013166 | 0 |



|      |          |          |     |     |          |          |          |   |
|------|----------|----------|-----|-----|----------|----------|----------|---|
| chr5 | 91150001 | 91250000 | 718 | 901 | 91200000 | -0.13158 | 0.049321 | 0 |
| chr5 | 91450001 | 91550000 | 572 | 728 | 91500000 | -0.15196 | 0.028373 | 0 |
| chr5 | 91550001 | 91650000 | 538 | 685 | 91600000 | -0.15253 | 0.027912 | 0 |
| chr5 | 92250001 | 92350000 | 715 | 912 | 92300000 | -0.15513 | 0.025909 | 0 |
| chr5 | 92300001 | 92400000 | 687 | 889 | 92350000 | -0.17591 | 0.013811 | 0 |
| chr5 | 92500001 | 92600000 | 616 | 788 | 92550000 | -0.1593  | 0.022938 | 0 |
| chr5 | 92550001 | 92650000 | 656 | 831 | 92600000 | -0.14519 | 0.034302 | 0 |
| chr5 | 93000001 | 93100000 | 676 | 852 | 93050000 | -0.13787 | 0.04183  | 0 |
| chr5 | 94500001 | 94600000 | 703 | 894 | 94550000 | -0.15079 | 0.029334 | 0 |
| chr5 | 96700001 | 96800000 | 699 | 882 | 96750000 | -0.13952 | 0.040019 | 0 |
| chr5 | 96800001 | 96900000 | 647 | 830 | 96850000 | -0.16338 | 0.020319 | 0 |
| chr5 | 97050001 | 97150000 | 511 | 660 | 97100000 | -0.17318 | 0.01505  | 0 |
| chr5 | 97200001 | 97300000 | 556 | 699 | 97250000 | -0.13424 | 0.046024 | 0 |
| chr5 | 97550001 | 97650000 | 603 | 778 | 97600000 | -0.17165 | 0.015786 | 0 |
| chr5 | 97600001 | 97700000 | 633 | 807 | 97650000 | -0.1544  | 0.026458 | 0 |
| chr5 | 97800001 | 97900000 | 674 | 870 | 97850000 | -0.1723  | 0.015468 | 0 |
| chr5 | 98000001 | 98100000 | 665 | 690 | 98050000 | 0.142721 | 0.035749 | 0 |
| chr5 | 98300001 | 98400000 | 642 | 822 | 98350000 | -0.1606  | 0.022075 | 0 |
| chr5 | 98750001 | 98850000 | 210 | 269 | 98800000 | -0.16125 | 0.021652 | 0 |
| chr5 | 98850001 | 98950000 | 375 | 472 | 98900000 | -0.13593 | 0.044029 | 0 |
| chr5 | 99000001 | 99100000 | 530 | 675 | 99050000 | -0.15293 | 0.027597 | 0 |
| chr5 | 99100001 | 99200000 | 564 | 710 | 99150000 | -0.13616 | 0.043765 | 0 |
| chr5 | 99150001 | 99250000 | 569 | 718 | 99200000 | -0.13959 | 0.039945 | 0 |
| chr5 | 99250001 | 99350000 | 568 | 730 | 99300000 | -0.16604 | 0.018753 | 0 |
| chr5 | 99550001 | 99650000 | 619 | 793 | 99600000 | -0.16142 | 0.021546 | 0 |
| chr5 | 99650001 | 99750000 | 207 | 260 | 99700000 | -0.13292 | 0.047643 | 0 |
| chr5 | 99800001 | 99900000 | 613 | 789 | 99850000 | -0.16818 | 0.017572 | 0 |
| chr5 | 1E+08    | 1.01E+08 | 556 | 710 | 1.01E+08 | -0.15677 | 0.024703 | 0 |
| chr5 | 1.01E+08 | 1.01E+08 | 525 | 662 | 1.01E+08 | -0.13855 | 0.041075 | 0 |
| chr5 | 1.01E+08 | 1.01E+08 | 601 | 754 | 1.01E+08 | -0.13124 | 0.04976  | 0 |
| chr5 | 1.01E+08 | 1.01E+08 | 599 | 773 | 1.01E+08 | -0.17195 | 0.01564  | 0 |
| chr5 | 1.01E+08 | 1.02E+08 | 579 | 735 | 1.01E+08 | -0.14822 | 0.031534 | 0 |
| chr5 | 1.02E+08 | 1.02E+08 | 585 | 745 | 1.02E+08 | -0.15284 | 0.027669 | 0 |
| chr5 | 1.02E+08 | 1.02E+08 | 625 | 803 | 1.02E+08 | -0.16558 | 0.019017 | 0 |
| chr5 | 1.02E+08 | 1.02E+08 | 675 | 858 | 1.02E+08 | -0.15013 | 0.029887 | 0 |
| chr5 | 1.03E+08 | 1.03E+08 | 731 | 924 | 1.03E+08 | -0.14206 | 0.037371 | 0 |
| chr5 | 1.03E+08 | 1.03E+08 | 676 | 873 | 1.03E+08 | -0.173   | 0.015137 | 0 |
| chr5 | 1.03E+08 | 1.03E+08 | 579 | 744 | 1.03E+08 | -0.16578 | 0.018905 | 0 |
| chr5 | 1.03E+08 | 1.04E+08 | 511 | 655 | 1.03E+08 | -0.16221 | 0.021045 | 0 |
| chr5 | 1.04E+08 | 1.04E+08 | 571 | 719 | 1.04E+08 | -0.13654 | 0.043331 | 0 |
| chr5 | 1.04E+08 | 1.04E+08 | 542 | 701 | 1.04E+08 | -0.17516 | 0.014143 | 0 |
| chr5 | 1.04E+08 | 1.04E+08 | 564 | 725 | 1.04E+08 | -0.16632 | 0.018594 | 0 |
| chr5 | 1.04E+08 | 1.05E+08 | 527 | 674 | 1.05E+08 | -0.15898 | 0.023155 | 0 |
| chr5 | 1.05E+08 | 1.05E+08 | 581 | 750 | 1.05E+08 | -0.17239 | 0.015427 | 0 |
| chr5 | 1.05E+08 | 1.05E+08 | 532 | 685 | 1.05E+08 | -0.16871 | 0.017284 | 0 |
| chr5 | 1.05E+08 | 1.05E+08 | 531 | 670 | 1.05E+08 | -0.13949 | 0.040059 | 0 |
| chr5 | 1.05E+08 | 1.05E+08 | 553 | 708 | 1.05E+08 | -0.16051 | 0.022137 | 0 |

|      |          |          |     |     |          |          |          |   |
|------|----------|----------|-----|-----|----------|----------|----------|---|
| chr5 | 1.05E+08 | 1.05E+08 | 585 | 748 | 1.05E+08 | -0.15864 | 0.02339  | 0 |
| chr5 | 1.06E+08 | 1.06E+08 | 581 | 744 | 1.06E+08 | -0.1608  | 0.021945 | 0 |
| chr5 | 1.06E+08 | 1.06E+08 | 595 | 768 | 1.06E+08 | -0.17225 | 0.015492 | 0 |
| chr5 | 1.06E+08 | 1.06E+08 | 607 | 766 | 1.06E+08 | -0.13968 | 0.039846 | 0 |
| chr5 | 1.06E+08 | 1.06E+08 | 590 | 764 | 1.06E+08 | -0.17689 | 0.013387 | 0 |
| chr5 | 1.07E+08 | 1.07E+08 | 664 | 834 | 1.07E+08 | -0.1329  | 0.047664 | 0 |
| chr5 | 1.07E+08 | 1.07E+08 | 684 | 865 | 1.07E+08 | -0.14274 | 0.036684 | 0 |
| chr5 | 1.07E+08 | 1.07E+08 | 639 | 802 | 1.07E+08 | -0.13182 | 0.049013 | 0 |
| chr5 | 1.07E+08 | 1.07E+08 | 657 | 829 | 1.07E+08 | -0.13952 | 0.040027 | 0 |
| chr5 | 1.07E+08 | 1.07E+08 | 699 | 893 | 1.07E+08 | -0.1574  | 0.024251 | 0 |
| chr5 | 1.07E+08 | 1.07E+08 | 717 | 922 | 1.07E+08 | -0.16683 | 0.018309 | 0 |
| chr5 | 1.08E+08 | 1.08E+08 | 656 | 826 | 1.08E+08 | -0.13648 | 0.043394 | 0 |
| chr5 | 1.08E+08 | 1.08E+08 | 903 | 942 | 1.08E+08 | 0.134962 | 0.044155 | 0 |
| chr5 | 1.09E+08 | 1.09E+08 | 762 | 959 | 1.09E+08 | -0.13578 | 0.044211 | 0 |
| chr5 | 1.09E+08 | 1.09E+08 | 677 | 866 | 1.09E+08 | -0.15925 | 0.022975 | 0 |
| chr5 | 1.09E+08 | 1.1E+08  | 580 | 753 | 1.1E+08  | -0.18063 | 0.011876 | 0 |
| chr5 | 1.1E+08  | 1.1E+08  | 611 | 772 | 1.1E+08  | -0.14147 | 0.037977 | 0 |
| chr5 | 1.1E+08  | 1.1E+08  | 606 | 784 | 1.1E+08  | -0.17557 | 0.013959 | 0 |
| chr5 | 1.1E+08  | 1.1E+08  | 645 | 819 | 1.1E+08  | -0.1486  | 0.031197 | 0 |
| chr5 | 1.1E+08  | 1.1E+08  | 619 | 783 | 1.1E+08  | -0.14311 | 0.036316 | 0 |
| chr5 | 1.11E+08 | 1.11E+08 | 678 | 866 | 1.11E+08 | -0.15712 | 0.024454 | 0 |
| chr5 | 1.11E+08 | 1.11E+08 | 874 | 890 | 1.11E+08 | 0.169791 | 0.016029 | 0 |
| chr5 | 1.11E+08 | 1.11E+08 | 742 | 934 | 1.11E+08 | -0.13604 | 0.043905 | 0 |
| chr5 | 1.11E+08 | 1.11E+08 | 716 | 911 | 1.11E+08 | -0.15153 | 0.028724 | 0 |
| chr5 | 1.11E+08 | 1.11E+08 | 698 | 879 | 1.11E+08 | -0.13667 | 0.043177 | 0 |
| chr5 | 1.12E+08 | 1.12E+08 | 757 | 952 | 1.12E+08 | -0.13471 | 0.045473 | 0 |
| chr5 | 1.13E+08 | 1.13E+08 | 634 | 818 | 1.13E+08 | -0.17165 | 0.015783 | 0 |
| chr5 | 1.13E+08 | 1.13E+08 | 641 | 808 | 1.13E+08 | -0.13807 | 0.041607 | 0 |
| chr5 | 1.13E+08 | 1.13E+08 | 630 | 818 | 1.13E+08 | -0.18079 | 0.011817 | 0 |
| chr5 | 1.13E+08 | 1.13E+08 | 624 | 811 | 1.13E+08 | -0.18219 | 0.011291 | 0 |
| chr5 | 1.13E+08 | 1.14E+08 | 566 | 710 | 1.13E+08 | -0.13105 | 0.049994 | 0 |
| chr5 | 1.14E+08 | 1.14E+08 | 619 | 780 | 1.14E+08 | -0.13757 | 0.04216  | 0 |
| chr5 | 1.14E+08 | 1.14E+08 | 609 | 770 | 1.14E+08 | -0.14245 | 0.036972 | 0 |
| chr5 | 1.14E+08 | 1.14E+08 | 581 | 742 | 1.14E+08 | -0.15692 | 0.024597 | 0 |
| chr5 | 1.14E+08 | 1.14E+08 | 542 | 703 | 1.14E+08 | -0.17927 | 0.012409 | 0 |
| chr5 | 1.14E+08 | 1.14E+08 | 575 | 740 | 1.14E+08 | -0.168   | 0.017667 | 0 |
| chr5 | 1.15E+08 | 1.15E+08 | 693 | 898 | 1.15E+08 | -0.1779  | 0.012966 | 0 |
| chr5 | 1.15E+08 | 1.15E+08 | 709 | 904 | 1.15E+08 | -0.15457 | 0.026326 | 0 |
| chr5 | 1.16E+08 | 1.16E+08 | 570 | 732 | 1.16E+08 | -0.16492 | 0.019401 | 0 |
| chr5 | 1.16E+08 | 1.16E+08 | 682 | 708 | 1.16E+08 | 0.141985 | 0.036485 | 0 |
| chr5 | 1.17E+08 | 1.17E+08 | 597 | 756 | 1.17E+08 | -0.14469 | 0.034775 | 0 |
| chr5 | 1.17E+08 | 1.17E+08 | 565 | 733 | 1.17E+08 | -0.1796  | 0.012278 | 0 |
| chr5 | 1.17E+08 | 1.17E+08 | 629 | 805 | 1.17E+08 | -0.15997 | 0.022494 | 0 |
| chr5 | 1.18E+08 | 1.18E+08 | 639 | 809 | 1.18E+08 | -0.14436 | 0.035093 | 0 |
| chr5 | 1.18E+08 | 1.18E+08 | 598 | 754 | 1.18E+08 | -0.13846 | 0.041179 | 0 |
| chr5 | 1.18E+08 | 1.18E+08 | 682 | 861 | 1.18E+08 | -0.14028 | 0.039215 | 0 |
| chr5 | 1.18E+08 | 1.18E+08 | 606 | 775 | 1.18E+08 | -0.15892 | 0.023201 | 0 |

|      |          |          |      |      |          |          |          |   |
|------|----------|----------|------|------|----------|----------|----------|---|
| chr5 | 1.19E+08 | 1.19E+08 | 754  | 959  | 1.19E+08 | -0.151   | 0.029155 | 0 |
| chr5 | 1.19E+08 | 1.19E+08 | 669  | 854  | 1.19E+08 | -0.15627 | 0.025068 | 0 |
| chr5 | 1.19E+08 | 1.19E+08 | 643  | 830  | 1.19E+08 | -0.17233 | 0.015455 | 0 |
| chr5 | 1.19E+08 | 1.2E+08  | 598  | 759  | 1.19E+08 | -0.14799 | 0.031734 | 0 |
| chr5 | 1.2E+08  | 1.2E+08  | 607  | 773  | 1.2E+08  | -0.15281 | 0.027694 | 0 |
| chr5 | 1.2E+08  | 1.2E+08  | 655  | 840  | 1.2E+08  | -0.16293 | 0.020596 | 0 |
| chr5 | 1.2E+08  | 1.2E+08  | 578  | 735  | 1.2E+08  | -0.15071 | 0.029397 | 0 |
| chr5 | 1.21E+08 | 1.21E+08 | 544  | 700  | 1.21E+08 | -0.16779 | 0.017783 | 0 |
| chr5 | 1.21E+08 | 1.21E+08 | 567  | 728  | 1.21E+08 | -0.16463 | 0.019573 | 0 |
| chr5 | 1.21E+08 | 1.21E+08 | 596  | 749  | 1.21E+08 | -0.13369 | 0.046695 | 0 |
| chr5 | 1.21E+08 | 1.21E+08 | 568  | 714  | 1.21E+08 | -0.13407 | 0.046235 | 0 |
| chr5 | 1.21E+08 | 1.21E+08 | 700  | 884  | 1.21E+08 | -0.14073 | 0.038742 | 0 |
| chr5 | 1.21E+08 | 1.22E+08 | 707  | 888  | 1.22E+08 | -0.13289 | 0.047682 | 0 |
| chr5 | 1.22E+08 | 1.22E+08 | 609  | 774  | 1.22E+08 | -0.14993 | 0.030055 | 0 |
| chr5 | 1.22E+08 | 1.22E+08 | 682  | 870  | 1.22E+08 | -0.15528 | 0.025794 | 0 |
| chr5 | 1.22E+08 | 1.22E+08 | 721  | 913  | 1.22E+08 | -0.14465 | 0.034813 | 0 |
| chr5 | 1.23E+08 | 1.23E+08 | 767  | 978  | 1.23E+08 | -0.15464 | 0.026272 | 0 |
| chr5 | 1.23E+08 | 1.23E+08 | 672  | 854  | 1.23E+08 | -0.14981 | 0.030154 | 0 |
| chr5 | 1.24E+08 | 1.24E+08 | 624  | 784  | 1.24E+08 | -0.13334 | 0.047118 | 0 |
| chr5 | 1.24E+08 | 1.24E+08 | 681  | 863  | 1.24E+08 | -0.14574 | 0.033782 | 0 |
| chr5 | 1.24E+08 | 1.24E+08 | 717  | 907  | 1.24E+08 | -0.14317 | 0.03626  | 0 |
| chr5 | 1.24E+08 | 1.24E+08 | 761  | 957  | 1.24E+08 | -0.13466 | 0.045527 | 0 |
| chr5 | 1.24E+08 | 1.24E+08 | 705  | 889  | 1.24E+08 | -0.1386  | 0.041024 | 0 |
| chr5 | 1.24E+08 | 1.24E+08 | 673  | 874  | 1.24E+08 | -0.18106 | 0.011712 | 0 |
| chr5 | 1.25E+08 | 1.25E+08 | 683  | 865  | 1.25E+08 | -0.14485 | 0.034623 | 0 |
| chr5 | 1.25E+08 | 1.25E+08 | 715  | 904  | 1.25E+08 | -0.14242 | 0.037009 | 0 |
| chr5 | 1.25E+08 | 1.25E+08 | 734  | 937  | 1.25E+08 | -0.15631 | 0.025039 | 0 |
| chr5 | 1.25E+08 | 1.25E+08 | 656  | 833  | 1.25E+08 | -0.14866 | 0.031148 | 0 |
| chr5 | 1.25E+08 | 1.25E+08 | 597  | 756  | 1.25E+08 | -0.14469 | 0.034775 | 0 |
| chr5 | 1.25E+08 | 1.25E+08 | 596  | 764  | 1.25E+08 | -0.1623  | 0.02099  | 0 |
| chr5 | 1.25E+08 | 1.25E+08 | 686  | 865  | 1.25E+08 | -0.13853 | 0.041099 | 0 |
| chr5 | 1.25E+08 | 1.25E+08 | 651  | 848  | 1.25E+08 | -0.18544 | 0.010152 | 0 |
| chr5 | 1.26E+08 | 1.26E+08 | 811  | 843  | 1.26E+08 | 0.140132 | 0.038394 | 0 |
| chr5 | 1.26E+08 | 1.26E+08 | 873  | 894  | 1.26E+08 | 0.16167  | 0.020609 | 0 |
| chr5 | 1.26E+08 | 1.26E+08 | 876  | 909  | 1.26E+08 | 0.142614 | 0.035856 | 0 |
| chr5 | 1.28E+08 | 1.28E+08 | 637  | 826  | 1.28E+08 | -0.17889 | 0.012563 | 0 |
| chr5 | 1.28E+08 | 1.28E+08 | 634  | 820  | 1.28E+08 | -0.17518 | 0.014134 | 0 |
| chr5 | 1.29E+08 | 1.29E+08 | 651  | 830  | 1.29E+08 | -0.15449 | 0.026389 | 0 |
| chr5 | 1.3E+08  | 1.3E+08  | 575  | 745  | 1.3E+08  | -0.17772 | 0.013041 | 0 |
| chr5 | 1.3E+08  | 1.3E+08  | 591  | 748  | 1.3E+08  | -0.14392 | 0.035523 | 0 |
| chr5 | 1.3E+08  | 1.3E+08  | 595  | 762  | 1.3E+08  | -0.16094 | 0.021856 | 0 |
| chr5 | 1.3E+08  | 1.3E+08  | 653  | 830  | 1.3E+08  | -0.15007 | 0.029939 | 0 |
| chr5 | 1.3E+08  | 1.31E+08 | 579  | 747  | 1.3E+08  | -0.17158 | 0.015819 | 0 |
| chr5 | 1.31E+08 | 1.31E+08 | 876  | 885  | 1.31E+08 | 0.181216 | 0.011079 | 0 |
| chr5 | 1.32E+08 | 1.32E+08 | 1035 | 1051 | 1.32E+08 | 0.173831 | 0.014096 | 0 |
| chr5 | 1.32E+08 | 1.32E+08 | 825  | 1053 | 1.32E+08 | -0.15608 | 0.025207 | 0 |
| chr5 | 1.32E+08 | 1.32E+08 | 1032 | 1052 | 1.32E+08 | 0.168271 | 0.016812 | 0 |

|      |          |          |      |      |          |          |          |   |
|------|----------|----------|------|------|----------|----------|----------|---|
| chr5 | 1.33E+08 | 1.33E+08 | 957  | 977  | 1.33E+08 | 0.166123 | 0.017976 | 0 |
| chr5 | 1.33E+08 | 1.34E+08 | 1093 | 1131 | 1.33E+08 | 0.146658 | 0.032015 | 0 |
| chr5 | 1.34E+08 | 1.34E+08 | 853  | 874  | 1.34E+08 | 0.160875 | 0.021112 | 0 |
| chr5 | 1.34E+08 | 1.35E+08 | 1142 | 1181 | 1.35E+08 | 0.147517 | 0.031244 | 0 |
| chr5 | 1.36E+08 | 1.36E+08 | 729  | 922  | 1.36E+08 | -0.14288 | 0.03654  | 0 |
| chr5 | 1.36E+08 | 1.37E+08 | 815  | 1043 | 1.37E+08 | -0.1599  | 0.022535 | 0 |
| chr5 | 1.37E+08 | 1.37E+08 | 732  | 950  | 1.37E+08 | -0.18012 | 0.012074 | 0 |
| chr5 | 1.38E+08 | 1.38E+08 | 927  | 950  | 1.38E+08 | 0.160605 | 0.021285 | 0 |
| chr5 | 1.39E+08 | 1.39E+08 | 1234 | 1289 | 1.39E+08 | 0.133053 | 0.046451 | 0 |
| chr5 | 1.39E+08 | 1.39E+08 | 1005 | 1021 | 1.39E+08 | 0.173176 | 0.014395 | 0 |
| chr5 | 1.39E+08 | 1.39E+08 | 1599 | 1635 | 1.39E+08 | 0.163842 | 0.019286 | 0 |
| chr5 | 1.39E+08 | 1.39E+08 | 1540 | 1594 | 1.39E+08 | 0.146242 | 0.032393 | 0 |
| chr5 | 1.4E+08  | 1.4E+08  | 1322 | 1357 | 1.4E+08  | 0.158264 | 0.022838 | 0 |
| chr5 | 1.4E+08  | 1.4E+08  | 1337 | 1392 | 1.4E+08  | 0.137803 | 0.040908 | 0 |
| chr5 | 1.4E+08  | 1.4E+08  | 1267 | 1322 | 1.4E+08  | 0.134657 | 0.044515 | 0 |
| chr5 | 1.4E+08  | 1.4E+08  | 1260 | 1292 | 1.40E+08 | 0.159781 | 0.021822 | 0 |
| chr5 | 1.4E+08  | 1.4E+08  | 1260 | 1275 | 1.4E+08  | 0.17889  | 0.011962 | 0 |
| chr5 | 1.41E+08 | 1.41E+08 | 1549 | 1611 | 1.41E+08 | 0.139344 | 0.039231 | 0 |
| chr5 | 1.41E+08 | 1.41E+08 | 1391 | 1455 | 1.41E+08 | 0.131066 | 0.048942 | 0 |
| chr5 | 1.41E+08 | 1.41E+08 | 1352 | 1401 | 1.41E+08 | 0.144601 | 0.033923 | 0 |
| chr5 | 1.41E+08 | 1.42E+08 | 1119 | 1161 | 1.41E+08 | 0.142805 | 0.035666 | 0 |
| chr5 | 1.41E+08 | 1.42E+08 | 1133 | 1161 | 1.42E+08 | 0.160743 | 0.021197 | 0 |
| chr5 | 1.44E+08 | 1.44E+08 | 800  | 1042 | 1.44E+08 | -0.18532 | 0.010193 | 0 |
| chr5 | 1.44E+08 | 1.44E+08 | 815  | 1026 | 1.44E+08 | -0.1362  | 0.043725 | 0 |
| chr5 | 1.47E+08 | 1.47E+08 | 979  | 1271 | 1.47E+08 | -0.18062 | 0.011881 | 0 |
| chr5 | 1.49E+08 | 1.49E+08 | 1460 | 1507 | 1.49E+08 | 0.150252 | 0.028893 | 0 |
| chr5 | 1.49E+08 | 1.49E+08 | 1199 | 1210 | 1.49E+08 | 0.182788 | 0.010515 | 0 |
| chr5 | 1.5E+08  | 1.5E+08  | 1608 | 1626 | 1.5E+08  | 0.179903 | 0.01157  | 0 |
| chr5 | 1.5E+08  | 1.5E+08  | 1543 | 1605 | 1.5E+08  | 0.139128 | 0.039463 | 0 |
| chr5 | 1.5E+08  | 1.5E+08  | 1415 | 1479 | 1.5E+08  | 0.132143 | 0.047579 | 0 |
| chr5 | 1.5E+08  | 1.5E+08  | 1679 | 1734 | 1.50E+08 | 0.149461 | 0.029557 | 0 |
| chr5 | 1.5E+08  | 1.5E+08  | 1285 | 1324 | 1.5E+08  | 0.152828 | 0.026815 | 0 |
| chr5 | 1.5E+08  | 1.5E+08  | 904  | 1155 | 1.5E+08  | -0.15754 | 0.024159 | 0 |
| chr5 | 1.51E+08 | 1.51E+08 | 1390 | 1439 | 1.51E+08 | 0.145981 | 0.032632 | 0 |
| chr5 | 1.51E+08 | 1.51E+08 | 1271 | 1321 | 1.51E+08 | 0.140297 | 0.038222 | 0 |
| chr5 | 1.51E+08 | 1.51E+08 | 1224 | 1271 | 1.51E+08 | 0.141603 | 0.036873 | 0 |
| chr5 | 1.52E+08 | 1.52E+08 | 932  | 1189 | 1.52E+08 | -0.15538 | 0.025718 | 0 |
| chr5 | 1.52E+08 | 1.52E+08 | 886  | 1145 | 1.52E+08 | -0.17401 | 0.014666 | 0 |
| chr5 | 1.52E+08 | 1.53E+08 | 840  | 1054 | 1.52E+08 | -0.13145 | 0.049486 | 0 |
| chr5 | 1.53E+08 | 1.53E+08 | 772  | 1003 | 1.53E+08 | -0.18169 | 0.011478 | 0 |
| chr5 | 1.53E+08 | 1.53E+08 | 690  | 893  | 1.53E+08 | -0.1761  | 0.013728 | 0 |
| chr5 | 1.54E+08 | 1.54E+08 | 1203 | 1247 | 1.54E+08 | 0.144138 | 0.034365 | 0 |
| chr5 | 1.54E+08 | 1.54E+08 | 1379 | 1402 | 1.54E+08 | 0.172099 | 0.014898 | 0 |
| chr5 | 1.54E+08 | 1.54E+08 | 978  | 1238 | 1.54E+08 | -0.14414 | 0.035305 | 0 |
| chr5 | 1.55E+08 | 1.55E+08 | 984  | 1249 | 1.55E+08 | -0.14808 | 0.031656 | 0 |
| chr5 | 1.55E+08 | 1.55E+08 | 953  | 1228 | 1.55E+08 | -0.1698  | 0.016717 | 0 |
| chr5 | 1.55E+08 | 1.55E+08 | 552  | 714  | 1.55E+08 | -0.17529 | 0.014083 | 0 |

|      |          |          |      |      |          |          |          |   |
|------|----------|----------|------|------|----------|----------|----------|---|
| chr5 | 1.55E+08 | 1.55E+08 | 871  | 1106 | 1.55E+08 | -0.14864 | 0.03116  | 0 |
| chr5 | 1.55E+08 | 1.55E+08 | 880  | 1104 | 1.55E+08 | -0.1312  | 0.049805 | 0 |
| chr5 | 1.56E+08 | 1.56E+08 | 868  | 1116 | 1.56E+08 | -0.16661 | 0.018434 | 0 |
| chr5 | 1.56E+08 | 1.56E+08 | 922  | 1179 | 1.56E+08 | -0.15876 | 0.023306 | 0 |
| chr5 | 1.56E+08 | 1.56E+08 | 956  | 1217 | 1.56E+08 | -0.15228 | 0.028113 | 0 |
| chr5 | 1.56E+08 | 1.56E+08 | 813  | 1038 | 1.56E+08 | -0.15652 | 0.024887 | 0 |
| chr5 | 1.56E+08 | 1.56E+08 | 812  | 1032 | 1.56E+08 | -0.14993 | 0.030055 | 0 |
| chr5 | 1.56E+08 | 1.56E+08 | 768  | 975  | 1.56E+08 | -0.14833 | 0.031433 | 0 |
| chr5 | 1.56E+08 | 1.56E+08 | 724  | 929  | 1.56E+08 | -0.16373 | 0.020111 | 0 |
| chr5 | 1.57E+08 | 1.57E+08 | 801  | 1007 | 1.57E+08 | -0.13423 | 0.046046 | 0 |
| chr5 | 1.57E+08 | 1.57E+08 | 777  | 989  | 1.57E+08 | -0.15209 | 0.028266 | 0 |
| chr5 | 1.58E+08 | 1.58E+08 | 895  | 1129 | 1.58E+08 | -0.13912 | 0.040451 | 0 |
| chr5 | 1.59E+08 | 1.59E+08 | 1247 | 1265 | 1.59E+08 | 0.175287 | 0.01345  | 0 |
| chr5 | 1.59E+08 | 1.59E+08 | 1179 | 1224 | 1.59E+08 | 0.141923 | 0.036548 | 0 |
| chr5 | 1.59E+08 | 1.59E+08 | 1084 | 1398 | 1.59E+08 | -0.17104 | 0.016089 | 0 |
| chr5 | 1.6E+08  | 1.6E+08  | 1266 | 1306 | 1.6E+08  | 0.151086 | 0.028206 | 0 |
| chr5 | 1.6E+08  | 1.6E+08  | 1269 | 1323 | 1.6E+08  | 0.135842 | 0.043128 | 0 |
| chr5 | 1.6E+08  | 1.6E+08  | 900  | 1133 | 1.6E+08  | -0.13619 | 0.043734 | 0 |
| chr5 | 1.61E+08 | 1.61E+08 | 851  | 1078 | 1.61E+08 | -0.14516 | 0.034327 | 0 |
| chr5 | 1.62E+08 | 1.62E+08 | 845  | 1088 | 1.62E+08 | -0.16869 | 0.017296 | 0 |
| chr5 | 1.62E+08 | 1.62E+08 | 815  | 1059 | 1.62E+08 | -0.18187 | 0.011411 | 0 |
| chr5 | 1.63E+08 | 1.63E+08 | 962  | 1217 | 1.63E+08 | -0.14326 | 0.03617  | 0 |
| chr5 | 1.64E+08 | 1.64E+08 | 775  | 975  | 1.64E+08 | -0.13524 | 0.044836 | 0 |
| chr5 | 1.65E+08 | 1.65E+08 | 881  | 1118 | 1.65E+08 | -0.14774 | 0.031955 | 0 |
| chr5 | 1.65E+08 | 1.65E+08 | 862  | 1099 | 1.65E+08 | -0.15447 | 0.026406 | 0 |
| chr5 | 1.65E+08 | 1.65E+08 | 821  | 1065 | 1.65E+08 | -0.17944 | 0.012343 | 0 |
| chr5 | 1.65E+08 | 1.65E+08 | 818  | 1055 | 1.65E+08 | -0.17111 | 0.016054 | 0 |
| chr5 | 1.65E+08 | 1.65E+08 | 815  | 1040 | 1.65E+08 | -0.15575 | 0.025447 | 0 |
| chr5 | 1.65E+08 | 1.65E+08 | 866  | 1089 | 1.65E+08 | -0.1346  | 0.045596 | 0 |
| chr5 | 1.65E+08 | 1.65E+08 | 782  | 983  | 1.65E+08 | -0.13406 | 0.046247 | 0 |
| chr5 | 1.65E+08 | 1.65E+08 | 796  | 1010 | 1.65E+08 | -0.14755 | 0.032126 | 0 |
| chr5 | 1.65E+08 | 1.66E+08 | 839  | 1078 | 1.65E+08 | -0.16565 | 0.018976 | 0 |
| chr5 | 1.66E+08 | 1.66E+08 | 793  | 1012 | 1.66E+08 | -0.15585 | 0.02537  | 0 |
| chr5 | 1.66E+08 | 1.66E+08 | 823  | 1049 | 1.66E+08 | -0.15409 | 0.026697 | 0 |
| chr5 | 1.67E+08 | 1.67E+08 | 905  | 1161 | 1.67E+08 | -0.16342 | 0.020299 | 0 |
| chr5 | 1.7E+08  | 1.7E+08  | 1298 | 1349 | 1.70E+08 | 0.140363 | 0.038152 | 0 |
| chr5 | 1.7E+08  | 1.71E+08 | 768  | 997  | 1.7E+08  | -0.18052 | 0.011918 | 0 |
| chr5 | 1.72E+08 | 1.72E+08 | 1357 | 1388 | 1.72E+08 | 0.163376 | 0.019564 | 0 |
| chr5 | 1.72E+08 | 1.72E+08 | 1415 | 1432 | 1.72E+08 | 0.178734 | 0.012024 | 0 |
| chr5 | 1.72E+08 | 1.72E+08 | 1530 | 1601 | 1.72E+08 | 0.130521 | 0.049643 | 0 |
| chr5 | 1.72E+08 | 1.72E+08 | 1567 | 1623 | 1.72E+08 | 0.145305 | 0.033259 | 0 |
| chr5 | 1.72E+08 | 1.72E+08 | 1501 | 1541 | 1.72E+08 | 0.15802  | 0.023005 | 0 |
| chr5 | 1.72E+08 | 1.72E+08 | 1527 | 1558 | 1.72E+08 | 0.166968 | 0.017511 | 0 |
| chr5 | 1.72E+08 | 1.72E+08 | 1486 | 1519 | 1.72E+08 | 0.164275 | 0.019032 | 0 |
| chr5 | 1.73E+08 | 1.73E+08 | 1207 | 1223 | 1.73E+08 | 0.176964 | 0.012739 | 0 |
| chr5 | 1.73E+08 | 1.73E+08 | 1221 | 1249 | 1.73E+08 | 0.163253 | 0.019638 | 0 |
| chr5 | 1.73E+08 | 1.73E+08 | 1305 | 1347 | 1.73E+08 | 0.150263 | 0.028884 | 0 |

|      |          |          |      |      |          |          |           |   |
|------|----------|----------|------|------|----------|----------|-----------|---|
| chr5 | 1.73E+08 | 1.73E+08 | 1277 | 1333 | 1.73E+08 | 0.134045 | 0.045247  | 0 |
| chr5 | 1.75E+08 | 1.75E+08 | 1154 | 1194 | 1.75E+08 | 0.146803 | 0.031883  | 0 |
| chr5 | 1.75E+08 | 1.75E+08 | 1320 | 1380 | 1.75E+08 | 0.131833 | 0.047969  | 0 |
| chr5 | 1.76E+08 | 1.76E+08 | 1591 | 1622 | 1.76E+08 | 0.168123 | 0.016891  | 0 |
| chr5 | 1.76E+08 | 1.76E+08 | 1100 | 1128 | 1.76E+08 | 0.159699 | 0.021875  | 0 |
| chr5 | 1.76E+08 | 1.77E+08 | 1220 | 1254 | 1.77E+08 | 0.156307 | 0.024208  | 0 |
| chr5 | 1.77E+08 | 1.77E+08 | 1228 | 1266 | 1.77E+08 | 0.151996 | 0.027472  | 0 |
| chr5 | 1.77E+08 | 1.77E+08 | 1309 | 1368 | 1.77E+08 | 0.13236  | 0.047309  | 0 |
| chr5 | 1.77E+08 | 1.77E+08 | 1495 | 1512 | 1.77E+08 | 0.17965  | 0.011667  | 0 |
| chr5 | 1.77E+08 | 1.77E+08 | 313  | 318  | 1.77E+08 | 0.173099 | 0.01443   | 0 |
| chr5 | 1.77E+08 | 1.78E+08 | 821  | 840  | 1.78E+08 | 0.162956 | 0.019817  | 0 |
| chr5 | 1.79E+08 | 1.79E+08 | 1372 | 1428 | 1.79E+08 | 0.138248 | 0.040419  | 0 |
| chr5 | 1.79E+08 | 1.79E+08 | 1442 | 1504 | 1.79E+08 | 0.13523  | 0.043841  | 0 |
| chr5 | 1.79E+08 | 1.79E+08 | 1033 | 1065 | 1.79E+08 | 0.15195  | 0.027509  | 0 |
| chr5 | 1.79E+08 | 1.79E+08 | 1170 | 1217 | 1.79E+08 | 0.139142 | 0.039447  | 0 |
| chr5 | 1.79E+08 | 1.79E+08 | 1013 | 1024 | 1.79E+08 | 0.180381 | 0.011389  | 0 |
| chr5 | 1.79E+08 | 1.79E+08 | 1355 | 1394 | 1.79E+08 | 0.155025 | 0.025142  | 0 |
| chr5 | 1.79E+08 | 1.79E+08 | 1405 | 1419 | 1.79E+08 | 0.181659 | 0.010918  | 0 |
| chr5 | 1.79E+08 | 1.79E+08 | 1359 | 1420 | 1.79E+08 | 0.132618 | 0.046988  | 0 |
| chr5 | 1.8E+08  | 1.8E+08  | 1310 | 1355 | 1.8E+08  | 0.147237 | 0.031493  | 0 |
| chr5 | 1.8E+08  | 1.8E+08  | 1318 | 1372 | 1.8E+08  | 0.138033 | 0.040655  | 0 |
| chr5 | 1.8E+08  | 1.8E+08  | 1303 | 1347 | 1.8E+08  | 0.14805  | 0.030773  | 0 |
| chr5 | 1.8E+08  | 1.8E+08  | 1304 | 1337 | 1.80E+08 | 0.159907 | 0.021738  | 0 |
| chr5 | 1.8E+08  | 1.8E+08  | 1067 | 1102 | 1.8E+08  | 0.149399 | 0.02961   | 0 |
| chr5 | 1.81E+08 | 1.81E+08 | 1134 | 1177 | 1.81E+08 | 0.142269 | 0.036199  | 0 |
| chr6 | 1        | 100000   | 0    | 1    | 50000    | #NAME?   | 3.67E-137 | 0 |
| chr6 | 50001    | 150000   | 10   | 15   | 1.00E+05 | -0.389   | 8.31E-07  | 0 |
| chr6 | 9500001  | 9600000  | 904  | 1183 | 9550000  | -0.19209 | 0.008133  | 0 |
| chr6 | 13900001 | 14000000 | 1401 | 1407 | 13950000 | 0.189798 | 0.008294  | 0 |
| chr6 | 16250001 | 16350000 | 1100 | 1081 | 16300000 | 0.2211   | 0.002641  | 0 |
| chr6 | 16300001 | 16400000 | 1146 | 1115 | 16350000 | 0.235526 | 0.001487  | 0 |
| chr6 | 20200001 | 20300000 | 714  | 946  | 20250000 | -0.20995 | 0.004353  | 0 |
| chr6 | 20400001 | 20500000 | 944  | 941  | 20450000 | 0.200555 | 0.005686  | 0 |
| chr6 | 20800001 | 20900000 | 834  | 839  | 20850000 | 0.18734  | 0.009021  | 0 |
| chr6 | 21250001 | 21350000 | 693  | 916  | 21300000 | -0.20653 | 0.004923  | 0 |
| chr6 | 22200001 | 22300000 | 671  | 891  | 22250000 | -0.21315 | 0.003875  | 0 |
| chr6 | 22250001 | 22350000 | 661  | 875  | 22300000 | -0.20867 | 0.004559  | 0 |
| chr6 | 22300001 | 22400000 | 608  | 802  | 22350000 | -0.20357 | 0.005469  | 0 |
| chr6 | 22900001 | 23000000 | 625  | 831  | 22950000 | -0.21503 | 0.003616  | 0 |
| chr6 | 23350001 | 23450000 | 539  | 707  | 23400000 | -0.19546 | 0.007252  | 0 |
| chr6 | 24350001 | 24450000 | 833  | 820  | 24400000 | 0.218656 | 0.002903  | 0 |
| chr6 | 25200001 | 25300000 | 926  | 910  | 25250000 | 0.221109 | 0.00264   | 0 |
| chr6 | 25950001 | 26050000 | 943  | 932  | 2.60E+07 | 0.212891 | 0.003614  | 0 |
| chr6 | 26000001 | 26100000 | 871  | 873  | 26050000 | 0.192654 | 0.007515  | 0 |
| chr6 | 26050001 | 26150000 | 860  | 854  | 26100000 | 0.206064 | 0.004657  | 0 |
| chr6 | 26100001 | 26200000 | 906  | 858  | 26150000 | 0.274496 | 0.000272  | 0 |
| chr6 | 26150001 | 26250000 | 919  | 876  | 26200000 | 0.265097 | 0.000418  | 0 |

|      |          |          |      |      |          |          |          |   |
|------|----------|----------|------|------|----------|----------|----------|---|
| chr6 | 26200001 | 26300000 | 964  | 877  | 26250000 | 0.332419 | 1.46E-05 | 0 |
| chr6 | 26250001 | 26350000 | 948  | 940  | 26300000 | 0.208189 | 0.004306 | 0 |
| chr6 | 26450001 | 26550000 | 954  | 953  | 26500000 | 0.197476 | 0.006345 | 0 |
| chr6 | 26500001 | 26600000 | 1020 | 940  | 26550000 | 0.3138   | 3.94E-05 | 0 |
| chr6 | 26650001 | 26750000 | 284  | 285  | 26700000 | 0.190892 | 0.007988 | 0 |
| chr6 | 26850001 | 26950000 | 72   | 71   | 26900000 | 0.216141 | 0.003196 | 0 |
| chr6 | 27050001 | 27150000 | 902  | 869  | 27100000 | 0.249734 | 0.000821 | 0 |
| chr6 | 27100001 | 27200000 | 852  | 836  | 27150000 | 0.223314 | 0.002423 | 0 |
| chr6 | 27550001 | 27650000 | 848  | 824  | 27600000 | 0.237383 | 0.001379 | 0 |
| chr6 | 28000001 | 28100000 | 899  | 888  | 28050000 | 0.213724 | 0.003502 | 0 |
| chr6 | 28050001 | 28150000 | 998  | 937  | 28100000 | 0.286954 | 0.000151 | 0 |
| chr6 | 29550001 | 29650000 | 1004 | 984  | 29600000 | 0.224992 | 0.002269 | 0 |
| chr6 | 29950001 | 30050000 | 975  | 973  | 3.00E+07 | 0.198925 | 0.006027 | 0 |
| chr6 | 30000001 | 30100000 | 982  | 970  | 30050000 | 0.213701 | 0.003505 | 0 |
| chr6 | 30600001 | 30700000 | 1052 | 977  | 30650000 | 0.302667 | 6.97E-05 | 0 |
| chr6 | 30650001 | 30750000 | 1043 | 970  | 30700000 | 0.300646 | 7.71E-05 | 0 |
| chr6 | 31450001 | 31550000 | 945  | 915  | 31500000 | 0.242506 | 0.001115 | 0 |
| chr6 | 31500001 | 31600000 | 1082 | 1041 | 31550000 | 0.251693 | 0.000755 | 0 |
| chr6 | 31550001 | 31650000 | 1105 | 1090 | 31600000 | 0.215681 | 0.003252 | 0 |
| chr6 | 31600001 | 31700000 | 1192 | 1159 | 31650000 | 0.236467 | 0.001431 | 0 |
| chr6 | 31650001 | 31750000 | 1136 | 1119 | 31700000 | 0.217716 | 0.003009 | 0 |
| chr6 | 31700001 | 31800000 | 965  | 938  | 31750000 | 0.236904 | 0.001406 | 0 |
| chr6 | 31750001 | 31850000 | 936  | 886  | 31800000 | 0.275165 | 0.000264 | 0 |
| chr6 | 31800001 | 31900000 | 1008 | 956  | 31850000 | 0.272376 | 0.0003   | 0 |
| chr6 | 31850001 | 31950000 | 1035 | 948  | 31900000 | 0.322635 | 2.48E-05 | 0 |
| chr6 | 31900001 | 32000000 | 553  | 508  | 31950000 | 0.318414 | 3.10E-05 | 0 |
| chr6 | 32050001 | 32150000 | 1130 | 1130 | 32100000 | 0.195963 | 0.006694 | 0 |
| chr6 | 32100001 | 32200000 | 1103 | 1104 | 32150000 | 0.194656 | 0.007008 | 0 |
| chr6 | 33100001 | 33200000 | 1153 | 1135 | 33150000 | 0.218663 | 0.002902 | 0 |
| chr6 | 33150001 | 33250000 | 1120 | 1056 | 33200000 | 0.280852 | 0.000202 | 0 |
| chr6 | 33200001 | 33300000 | 1042 | 998  | 33250000 | 0.258207 | 0.000568 | 0 |
| chr6 | 33250001 | 33350000 | 835  | 821  | 33300000 | 0.220357 | 0.002718 | 0 |
| chr6 | 33300001 | 33400000 | 855  | 845  | 33350000 | 0.212936 | 0.003608 | 0 |
| chr6 | 33350001 | 33450000 | 1053 | 1047 | 33400000 | 0.204207 | 0.004983 | 0 |
| chr6 | 33500001 | 33600000 | 924  | 903  | 33550000 | 0.22913  | 0.001926 | 0 |
| chr6 | 34650001 | 34750000 | 848  | 806  | 34700000 | 0.269247 | 0.000346 | 0 |
| chr6 | 34750001 | 34850000 | 886  | 879  | 34800000 | 0.207407 | 0.004433 | 0 |
| chr6 | 34800001 | 34900000 | 956  | 950  | 34850000 | 0.205046 | 0.004833 | 0 |
| chr6 | 35200001 | 35300000 | 1122 | 1101 | 35250000 | 0.223221 | 0.002432 | 0 |
| chr6 | 35250001 | 35350000 | 981  | 971  | 35300000 | 0.210745 | 0.003917 | 0 |
| chr6 | 35300001 | 35400000 | 905  | 884  | 35350000 | 0.229834 | 0.001872 | 0 |
| chr6 | 35350001 | 35450000 | 1006 | 997  | 35400000 | 0.208928 | 0.00419  | 0 |
| chr6 | 35400001 | 35500000 | 1032 | 1040 | 35450000 | 0.184822 | 0.009823 | 0 |
| chr6 | 35850001 | 35950000 | 867  | 874  | 35900000 | 0.184362 | 0.009976 | 0 |
| chr6 | 36500001 | 36600000 | 943  | 919  | 36550000 | 0.233156 | 0.001638 | 0 |
| chr6 | 36550001 | 36650000 | 994  | 937  | 36600000 | 0.28116  | 0.000199 | 0 |
| chr6 | 36750001 | 36850000 | 1143 | 1082 | 36800000 | 0.275088 | 0.000265 | 0 |

|      |          |          |      |      |          |          |          |   |
|------|----------|----------|------|------|----------|----------|----------|---|
| chr6 | 36800001 | 36900000 | 1049 | 1015 | 36850000 | 0.243498 | 0.001069 | 0 |
| chr6 | 36950001 | 37050000 | 1104 | 1110 | 3.70E+07 | 0.188144 | 0.008778 | 0 |
| chr6 | 39550001 | 39650000 | 663  | 874  | 39600000 | -0.20266 | 0.005647 | 0 |
| chr6 | 41600001 | 41700000 | 1234 | 1229 | 41650000 | 0.201821 | 0.005433 | 0 |
| chr6 | 41650001 | 41750000 | 1206 | 1210 | 41700000 | 0.191186 | 0.007907 | 0 |
| chr6 | 41700001 | 41800000 | 1015 | 1019 | 41750000 | 0.190289 | 0.008156 | 0 |
| chr6 | 41750001 | 41850000 | 904  | 870  | 41800000 | 0.25127  | 0.000768 | 0 |
| chr6 | 41800001 | 41900000 | 938  | 902  | 41850000 | 0.252424 | 0.000731 | 0 |
| chr6 | 42150001 | 42250000 | 963  | 952  | 42200000 | 0.212537 | 0.003662 | 0 |
| chr6 | 42800001 | 42900000 | 835  | 800  | 42850000 | 0.257739 | 0.00058  | 0 |
| chr6 | 42850001 | 42950000 | 843  | 830  | 42900000 | 0.218384 | 0.002933 | 0 |
| chr6 | 42900001 | 43000000 | 952  | 935  | 42950000 | 0.221958 | 0.002555 | 0 |
| chr6 | 43650001 | 43750000 | 1223 | 1197 | 43700000 | 0.226964 | 0.002099 | 0 |
| chr6 | 43700001 | 43800000 | 1280 | 1237 | 43750000 | 0.245261 | 0.000993 | 0 |
| chr6 | 44050001 | 44150000 | 1165 | 1119 | 44100000 | 0.254083 | 0.00068  | 0 |
| chr6 | 44100001 | 44200000 | 1112 | 1098 | 44150000 | 0.214242 | 0.003435 | 0 |
| chr6 | 44150001 | 44250000 | 1152 | 1131 | 44200000 | 0.222505 | 0.002501 | 0 |
| chr6 | 44200001 | 44300000 | 1165 | 1167 | 44250000 | 0.193488 | 0.0073   | 0 |
| chr6 | 44300001 | 44400000 | 1005 | 1000 | 44350000 | 0.203159 | 0.005177 | 0 |
| chr6 | 44350001 | 44450000 | 983  | 954  | 44400000 | 0.239165 | 0.001281 | 0 |
| chr6 | 46250001 | 46350000 | 748  | 994  | 46300000 | -0.21424 | 0.003722 | 0 |
| chr6 | 46800001 | 46900000 | 655  | 899  | 46850000 | -0.26086 | 0.000581 | 0 |
| chr6 | 47800001 | 47900000 | 677  | 952  | 47850000 | -0.29584 | 0.00012  | 0 |
| chr6 | 47850001 | 47950000 | 634  | 857  | 47900000 | -0.23885 | 0.001448 | 0 |
| chr6 | 48050001 | 48150000 | 619  | 818  | 48100000 | -0.2062  | 0.004982 | 0 |
| chr6 | 49550001 | 49650000 | 555  | 775  | 49600000 | -0.28575 | 0.000192 | 0 |
| chr6 | 49600001 | 49700000 | 589  | 793  | 49650000 | -0.23309 | 0.001819 | 0 |
| chr6 | 50100001 | 50200000 | 528  | 708  | 50150000 | -0.22725 | 0.002282 | 0 |
| chr6 | 51050001 | 51150000 | 571  | 750  | 51100000 | -0.19744 | 0.006775 | 0 |
| chr6 | 51400001 | 51500000 | 632  | 843  | 51450000 | -0.21965 | 0.003046 | 0 |
| chr6 | 55150001 | 55250000 | 580  | 762  | 55200000 | -0.19778 | 0.006697 | 0 |
| chr6 | 55200001 | 55300000 | 597  | 826  | 55250000 | -0.27245 | 0.00035  | 0 |
| chr6 | 57750001 | 57850000 | 93   | 136  | 57800000 | -0.35234 | 6.68E-06 | 0 |
| chr6 | 57800001 | 57900000 | 85   | 118  | 57850000 | -0.27729 | 0.000282 | 0 |
| chr6 | 57850001 | 57950000 | 87   | 115  | 57900000 | -0.20658 | 0.004914 | 0 |
| chr6 | 57900001 | 58000000 | 178  | 250  | 57950000 | -0.29409 | 0.00013  | 0 |
| chr6 | 57950001 | 58050000 | 259  | 372  | 5.80E+07 | -0.32639 | 2.64E-05 | 0 |
| chr6 | 58000001 | 58100000 | 164  | 232  | 58050000 | -0.30447 | 7.90E-05 | 0 |
| chr6 | 58050001 | 58150000 | 62   | 60   | 58100000 | 0.243269 | 0.00108  | 0 |
| chr6 | 58150001 | 58250000 | 54   | 94   | 58200000 | -0.60374 | 2.03E-13 | 0 |
| chr6 | 58200001 | 58300000 | 43   | 75   | 58250000 | -0.60659 | 1.61E-13 | 0 |
| chr6 | 58250001 | 58350000 | 66   | 89   | 58300000 | -0.23538 | 0.001662 | 0 |
| chr6 | 58300001 | 58400000 | 84   | 136  | 58350000 | -0.49918 | 6.17E-10 | 0 |
| chr6 | 58350001 | 58450000 | 129  | 171  | 58400000 | -0.21066 | 0.004243 | 0 |
| chr6 | 58500001 | 58600000 | 141  | 191  | 58550000 | -0.24191 | 0.00128  | 0 |
| chr6 | 58550001 | 58650000 | 195  | 287  | 58600000 | -0.36161 | 4.01E-06 | 0 |
| chr6 | 62000001 | 62100000 | 360  | 499  | 62050000 | -0.27508 | 0.000312 | 0 |



|      |          |          |     |     |          |          |          |   |
|------|----------|----------|-----|-----|----------|----------|----------|---|
| chr6 | 62150001 | 62250000 | 291 | 413 | 62200000 | -0.30916 | 6.28E-05 | 0 |
| chr6 | 62200001 | 62300000 | 478 | 650 | 62250000 | -0.24747 | 0.00102  | 0 |
| chr6 | 62250001 | 62350000 | 538 | 711 | 62300000 | -0.20628 | 0.004967 | 0 |
| chr6 | 62300001 | 62400000 | 534 | 727 | 62350000 | -0.24915 | 0.000952 | 0 |
| chr6 | 62350001 | 62450000 | 567 | 756 | 62400000 | -0.21907 | 0.003112 | 0 |
| chr6 | 62500001 | 62600000 | 584 | 786 | 62550000 | -0.2326  | 0.001854 | 0 |
| chr6 | 62550001 | 62650000 | 580 | 764 | 62600000 | -0.20156 | 0.005871 | 0 |
| chr6 | 62600001 | 62700000 | 609 | 798 | 62650000 | -0.19398 | 0.007627 | 0 |
| chr6 | 62650001 | 62750000 | 602 | 785 | 62700000 | -0.18697 | 0.009654 | 0 |
| chr6 | 62750001 | 62850000 | 550 | 726 | 62800000 | -0.20457 | 0.005278 | 0 |
| chr6 | 62800001 | 62900000 | 612 | 807 | 62850000 | -0.20307 | 0.005566 | 0 |
| chr6 | 62850001 | 62950000 | 593 | 782 | 62900000 | -0.20317 | 0.005546 | 0 |
| chr6 | 62900001 | 63000000 | 584 | 766 | 62950000 | -0.19541 | 0.007264 | 0 |
| chr6 | 62950001 | 63050000 | 585 | 778 | 6.30E+07 | -0.21537 | 0.003571 | 0 |
| chr6 | 65150001 | 65250000 | 575 | 772 | 65200000 | -0.22908 | 0.002127 | 0 |
| chr6 | 65200001 | 65300000 | 586 | 776 | 65250000 | -0.20919 | 0.004474 | 0 |
| chr6 | 66450001 | 66550000 | 570 | 753 | 66500000 | -0.20572 | 0.005067 | 0 |
| chr6 | 66500001 | 66600000 | 523 | 740 | 66550000 | -0.30475 | 7.79E-05 | 0 |
| chr6 | 66550001 | 66650000 | 541 | 731 | 66600000 | -0.23828 | 0.001481 | 0 |
| chr6 | 66650001 | 66750000 | 530 | 738 | 66700000 | -0.28167 | 0.000231 | 0 |
| chr6 | 66700001 | 66800000 | 599 | 788 | 66750000 | -0.19968 | 0.006269 | 0 |
| chr6 | 67250001 | 67350000 | 485 | 647 | 67300000 | -0.21982 | 0.003027 | 0 |
| chr6 | 67300001 | 67400000 | 461 | 629 | 67350000 | -0.25233 | 0.000834 | 0 |
| chr6 | 67400001 | 67500000 | 553 | 721 | 67450000 | -0.18676 | 0.009722 | 0 |
| chr6 | 67450001 | 67550000 | 543 | 745 | 67500000 | -0.26033 | 0.000595 | 0 |
| chr6 | 67600001 | 67700000 | 547 | 748 | 67650000 | -0.25553 | 0.000729 | 0 |
| chr6 | 68400001 | 68500000 | 536 | 718 | 68450000 | -0.22579 | 0.002414 | 0 |
| chr6 | 69000001 | 69100000 | 590 | 793 | 69050000 | -0.23064 | 0.002001 | 0 |
| chr6 | 69050001 | 69150000 | 612 | 799 | 69100000 | -0.1887  | 0.009114 | 0 |
| chr6 | 69650001 | 69750000 | 621 | 823 | 69700000 | -0.21034 | 0.004293 | 0 |
| chr6 | 69700001 | 69800000 | 601 | 842 | 69750000 | -0.29049 | 0.000154 | 0 |
| chr6 | 69750001 | 69850000 | 581 | 794 | 69800000 | -0.25464 | 0.000757 | 0 |
| chr6 | 70650001 | 70750000 | 569 | 748 | 70700000 | -0.19865 | 0.006498 | 0 |
| chr6 | 71400001 | 71500000 | 593 | 780 | 71450000 | -0.19948 | 0.006313 | 0 |
| chr6 | 71450001 | 71550000 | 585 | 781 | 71500000 | -0.22092 | 0.002904 | 0 |
| chr6 | 71500001 | 71600000 | 729 | 977 | 71550000 | -0.22648 | 0.002351 | 0 |
| chr6 | 71550001 | 71650000 | 699 | 924 | 71600000 | -0.20664 | 0.004904 | 0 |
| chr6 | 72450001 | 72550000 | 562 | 744 | 72500000 | -0.20877 | 0.004543 | 0 |
| chr6 | 72800001 | 72900000 | 560 | 757 | 72850000 | -0.2389  | 0.001444 | 0 |
| chr6 | 72850001 | 72950000 | 586 | 794 | 72900000 | -0.24228 | 0.001261 | 0 |
| chr6 | 72950001 | 73050000 | 588 | 778 | 7.30E+07 | -0.20799 | 0.004672 | 0 |
| chr6 | 73400001 | 73500000 | 675 | 897 | 73450000 | -0.21426 | 0.003721 | 0 |
| chr6 | 74300001 | 74400000 | 588 | 583 | 74350000 | 0.208283 | 0.004291 | 0 |
| chr6 | 74350001 | 74450000 | 619 | 566 | 74400000 | 0.3251   | 2.17E-05 | 0 |
| chr6 | 74650001 | 74750000 | 368 | 482 | 74700000 | -0.19336 | 0.007789 | 0 |
| chr6 | 74850001 | 74950000 | 393 | 521 | 74900000 | -0.21079 | 0.004223 | 0 |
| chr6 | 76800001 | 76900000 | 383 | 505 | 76850000 | -0.20298 | 0.005585 | 0 |

|      |          |          |     |     |          |          |          |   |
|------|----------|----------|-----|-----|----------|----------|----------|---|
| chr6 | 77150001 | 77250000 | 387 | 528 | 77200000 | -0.25224 | 0.000837 | 0 |
| chr6 | 77550001 | 77650000 | 338 | 465 | 77600000 | -0.26424 | 0.000502 | 0 |
| chr6 | 78000001 | 78100000 | 442 | 579 | 78050000 | -0.19355 | 0.007739 | 0 |
| chr6 | 78250001 | 78350000 | 367 | 534 | 78300000 | -0.3451  | 9.89E-06 | 0 |
| chr6 | 78300001 | 78400000 | 362 | 489 | 78350000 | -0.23788 | 0.001505 | 0 |
| chr6 | 78500001 | 78600000 | 344 | 480 | 78550000 | -0.28466 | 0.000202 | 0 |
| chr6 | 78550001 | 78650000 | 348 | 483 | 78600000 | -0.27697 | 0.000286 | 0 |
| chr6 | 78600001 | 78700000 | 357 | 521 | 78650000 | -0.3494  | 7.84E-06 | 0 |
| chr6 | 78700001 | 78800000 | 409 | 405 | 78750000 | 0.210142 | 0.004006 | 0 |
| chr6 | 79800001 | 79900000 | 446 | 626 | 79850000 | -0.29316 | 0.000136 | 0 |
| chr6 | 81600001 | 81700000 | 411 | 551 | 81650000 | -0.22695 | 0.002309 | 0 |
| chr6 | 81650001 | 81750000 | 435 | 589 | 81700000 | -0.24129 | 0.001312 | 0 |
| chr6 | 82400001 | 82500000 | 658 | 647 | 82450000 | 0.220285 | 0.002726 | 0 |
| chr6 | 83100001 | 83200000 | 436 | 612 | 83150000 | -0.29324 | 0.000135 | 0 |
| chr6 | 83750001 | 83850000 | 624 | 590 | 83800000 | 0.276794 | 0.000244 | 0 |
| chr6 | 83850001 | 83950000 | 598 | 599 | 83900000 | 0.193553 | 0.007284 | 0 |
| chr6 | 84150001 | 84250000 | 433 | 574 | 84200000 | -0.21072 | 0.004234 | 0 |
| chr6 | 85000001 | 85100000 | 403 | 533 | 85050000 | -0.20739 | 0.004773 | 0 |
| chr6 | 85900001 | 86000000 | 429 | 566 | 85950000 | -0.20386 | 0.005413 | 0 |
| chr6 | 86150001 | 86250000 | 644 | 649 | 86200000 | 0.184805 | 0.009828 | 0 |
| chr6 | 86300001 | 86400000 | 632 | 599 | 86350000 | 0.273332 | 0.000287 | 0 |
| chr6 | 86350001 | 86450000 | 555 | 534 | 86400000 | 0.251611 | 0.000757 | 0 |
| chr6 | 87000001 | 87100000 | 398 | 528 | 87050000 | -0.21181 | 0.00407  | 0 |
| chr6 | 87050001 | 87150000 | 406 | 563 | 87100000 | -0.27569 | 0.000303 | 0 |
| chr6 | 87100001 | 87200000 | 404 | 546 | 87150000 | -0.23858 | 0.001463 | 0 |
| chr6 | 87650001 | 87750000 | 553 | 557 | 87700000 | 0.185565 | 0.00958  | 0 |
| chr6 | 88200001 | 88300000 | 600 | 603 | 88250000 | 0.188768 | 0.008592 | 0 |
| chr6 | 88250001 | 88350000 | 561 | 564 | 88300000 | 0.188269 | 0.00874  | 0 |
| chr6 | 91450001 | 91550000 | 445 | 596 | 91500000 | -0.22554 | 0.002437 | 0 |
| chr6 | 91500001 | 91600000 | 444 | 619 | 91550000 | -0.28342 | 0.000213 | 0 |
| chr6 | 91900001 | 92000000 | 404 | 546 | 91950000 | -0.23858 | 0.001463 | 0 |
| chr6 | 91950001 | 92050000 | 398 | 586 | 9.20E+07 | -0.36217 | 3.88E-06 | 0 |
| chr6 | 92250001 | 92350000 | 413 | 542 | 92300000 | -0.19619 | 0.007073 | 0 |
| chr6 | 92600001 | 92700000 | 390 | 534 | 92650000 | -0.2574  | 0.000673 | 0 |
| chr6 | 93350001 | 93450000 | 358 | 511 | 93400000 | -0.3174  | 4.17E-05 | 0 |
| chr6 | 93650001 | 93750000 | 335 | 458 | 93700000 | -0.25522 | 0.000739 | 0 |
| chr6 | 93850001 | 93950000 | 401 | 526 | 93900000 | -0.1955  | 0.007243 | 0 |
| chr6 | 94100001 | 94200000 | 402 | 530 | 94150000 | -0.20283 | 0.005613 | 0 |
| chr6 | 94300001 | 94400000 | 354 | 516 | 94350000 | -0.34766 | 8.62E-06 | 0 |
| chr6 | 94350001 | 94450000 | 396 | 547 | 94400000 | -0.27008 | 0.000389 | 0 |
| chr6 | 94450001 | 94550000 | 397 | 525 | 94500000 | -0.20722 | 0.004804 | 0 |
| chr6 | 95350001 | 95450000 | 387 | 542 | 95400000 | -0.29    | 0.000157 | 0 |
| chr6 | 95400001 | 95500000 | 372 | 506 | 95450000 | -0.24787 | 0.001003 | 0 |
| chr6 | 95750001 | 95850000 | 60  | 96  | 95800000 | -0.48211 | 2.06E-09 | 0 |
| chr6 | 95800001 | 95900000 | 251 | 356 | 95850000 | -0.30823 | 6.58E-05 | 0 |
| chr6 | 95850001 | 95950000 | 356 | 490 | 95900000 | -0.26494 | 0.000487 | 0 |
| chr6 | 96100001 | 96200000 | 392 | 523 | 96150000 | -0.21999 | 0.003007 | 0 |

|      |          |          |     |     |          |          |          |   |
|------|----------|----------|-----|-----|----------|----------|----------|---|
| chr6 | 96450001 | 96550000 | 410 | 541 | 96500000 | -0.20404 | 0.005379 | 0 |
| chr6 | 96500001 | 96600000 | 409 | 560 | 96550000 | -0.25736 | 0.000675 | 0 |
| chr6 | 96750001 | 96850000 | 413 | 552 | 96800000 | -0.22256 | 0.002729 | 0 |
| chr6 | 97100001 | 97200000 | 440 | 582 | 97150000 | -0.20755 | 0.004746 | 0 |
| chr6 | 97950001 | 98050000 | 429 | 612 | 9.80E+07 | -0.31659 | 4.34E-05 | 0 |
| chr6 | 98350001 | 98450000 | 487 | 647 | 98400000 | -0.21388 | 0.003772 | 0 |
| chr6 | 98950001 | 99050000 | 461 | 611 | 9.90E+07 | -0.21044 | 0.004276 | 0 |
| chr6 | 1.01E+08 | 1.01E+08 | 432 | 599 | 1.01E+08 | -0.27556 | 0.000305 | 0 |
| chr6 | 1.01E+08 | 1.01E+08 | 451 | 610 | 1.01E+08 | -0.23972 | 0.001398 | 0 |
| chr6 | 1.01E+08 | 1.02E+08 | 402 | 540 | 1.02E+08 | -0.2298  | 0.002068 | 0 |
| chr6 | 1.02E+08 | 1.02E+08 | 368 | 515 | 1.02E+08 | -0.2889  | 0.000166 | 0 |
| chr6 | 1.02E+08 | 1.02E+08 | 477 | 639 | 1.02E+08 | -0.22586 | 0.002407 | 0 |
| chr6 | 1.02E+08 | 1.03E+08 | 406 | 540 | 1.03E+08 | -0.21552 | 0.003552 | 0 |
| chr6 | 1.03E+08 | 1.03E+08 | 382 | 519 | 1.03E+08 | -0.2462  | 0.001075 | 0 |
| chr6 | 1.03E+08 | 1.03E+08 | 417 | 546 | 1.03E+08 | -0.19289 | 0.007916 | 0 |
| chr6 | 1.03E+08 | 1.03E+08 | 390 | 520 | 1.03E+08 | -0.21907 | 0.003112 | 0 |
| chr6 | 1.03E+08 | 1.04E+08 | 373 | 492 | 1.03E+08 | -0.20352 | 0.005479 | 0 |
| chr6 | 1.04E+08 | 1.04E+08 | 377 | 500 | 1.04E+08 | -0.2114  | 0.00413  | 0 |
| chr6 | 1.04E+08 | 1.04E+08 | 371 | 486 | 1.04E+08 | -0.19357 | 0.007734 | 0 |
| chr6 | 1.04E+08 | 1.04E+08 | 351 | 462 | 1.04E+08 | -0.20046 | 0.006101 | 0 |
| chr6 | 1.04E+08 | 1.04E+08 | 363 | 482 | 1.04E+08 | -0.2131  | 0.003882 | 0 |
| chr6 | 1.04E+08 | 1.04E+08 | 415 | 544 | 1.04E+08 | -0.19453 | 0.007486 | 0 |
| chr6 | 1.04E+08 | 1.05E+08 | 374 | 491 | 1.05E+08 | -0.19672 | 0.006945 | 0 |
| chr6 | 1.05E+08 | 1.05E+08 | 398 | 534 | 1.05E+08 | -0.22811 | 0.002208 | 0 |
| chr6 | 1.07E+08 | 1.08E+08 | 409 | 534 | 1.08E+08 | -0.18878 | 0.009091 | 0 |
| chr6 | 1.08E+08 | 1.08E+08 | 451 | 603 | 1.08E+08 | -0.22307 | 0.002678 | 0 |
| chr6 | 1.1E+08  | 1.11E+08 | 541 | 537 | 1.11E+08 | 0.20667  | 0.004554 | 0 |
| chr6 | 1.12E+08 | 1.12E+08 | 587 | 586 | 1.12E+08 | 0.198423 | 0.006136 | 0 |
| chr6 | 1.12E+08 | 1.12E+08 | 546 | 532 | 1.12E+08 | 0.233438 | 0.001619 | 0 |
| chr6 | 1.12E+08 | 1.12E+08 | 624 | 613 | 1.12E+08 | 0.221622 | 0.002588 | 0 |
| chr6 | 1.13E+08 | 1.13E+08 | 448 | 588 | 1.13E+08 | -0.19635 | 0.007033 | 0 |
| chr6 | 1.13E+08 | 1.13E+08 | 451 | 589 | 1.13E+08 | -0.18918 | 0.00897  | 0 |
| chr6 | 1.13E+08 | 1.14E+08 | 420 | 569 | 1.14E+08 | -0.24208 | 0.001271 | 0 |
| chr6 | 1.14E+08 | 1.14E+08 | 399 | 567 | 1.14E+08 | -0.311   | 5.74E-05 | 0 |
| chr6 | 1.14E+08 | 1.14E+08 | 453 | 599 | 1.14E+08 | -0.20708 | 0.004827 | 0 |
| chr6 | 1.15E+08 | 1.15E+08 | 413 | 555 | 1.15E+08 | -0.23038 | 0.002022 | 0 |
| chr6 | 1.15E+08 | 1.15E+08 | 414 | 558 | 1.15E+08 | -0.23467 | 0.001709 | 0 |
| chr6 | 1.15E+08 | 1.15E+08 | 391 | 510 | 1.15E+08 | -0.18737 | 0.009527 | 0 |
| chr6 | 1.16E+08 | 1.16E+08 | 363 | 496 | 1.16E+08 | -0.25441 | 0.000764 | 0 |
| chr6 | 1.16E+08 | 1.16E+08 | 392 | 521 | 1.16E+08 | -0.21447 | 0.003692 | 0 |
| chr6 | 1.16E+08 | 1.16E+08 | 422 | 560 | 1.16E+08 | -0.21222 | 0.004009 | 0 |
| chr6 | 1.16E+08 | 1.16E+08 | 412 | 539 | 1.16E+08 | -0.19168 | 0.008247 | 0 |
| chr6 | 1.16E+08 | 1.16E+08 | 417 | 563 | 1.16E+08 | -0.23712 | 0.001551 | 0 |
| chr6 | 1.16E+08 | 1.16E+08 | 421 | 569 | 1.16E+08 | -0.23865 | 0.001459 | 0 |
| chr6 | 1.16E+08 | 1.16E+08 | 439 | 601 | 1.16E+08 | -0.25718 | 0.00068  | 0 |
| chr6 | 1.17E+08 | 1.17E+08 | 440 | 582 | 1.17E+08 | -0.20755 | 0.004746 | 0 |
| chr6 | 1.17E+08 | 1.17E+08 | 327 | 468 | 1.17E+08 | -0.32125 | 3.43E-05 | 0 |

|      |          |          |     |     |          |          |          |   |
|------|----------|----------|-----|-----|----------|----------|----------|---|
| chr6 | 1.19E+08 | 1.19E+08 | 387 | 510 | 1.19E+08 | -0.2022  | 0.005739 | 0 |
| chr6 | 1.19E+08 | 1.19E+08 | 480 | 641 | 1.19E+08 | -0.22133 | 0.00286  | 0 |
| chr6 | 1.2E+08  | 1.2E+08  | 420 | 549 | 1.2E+08  | -0.19045 | 0.008594 | 0 |
| chr6 | 1.2E+08  | 1.2E+08  | 416 | 564 | 1.2E+08  | -0.24315 | 0.001217 | 0 |
| chr6 | 1.2E+08  | 1.2E+08  | 421 | 589 | 1.2E+08  | -0.28848 | 0.000169 | 0 |
| chr6 | 1.2E+08  | 1.2E+08  | 426 | 556 | 1.2E+08  | -0.18827 | 0.009246 | 0 |
| chr6 | 1.2E+08  | 1.2E+08  | 412 | 541 | 1.20E+08 | -0.19702 | 0.006873 | 0 |
| chr6 | 1.2E+08  | 1.2E+08  | 387 | 546 | 1.2E+08  | -0.3006  | 9.52E-05 | 0 |
| chr6 | 1.2E+08  | 1.2E+08  | 402 | 537 | 1.2E+08  | -0.22176 | 0.002813 | 0 |
| chr6 | 1.2E+08  | 1.2E+08  | 483 | 477 | 1.2E+08  | 0.213997 | 0.003466 | 0 |
| chr6 | 1.21E+08 | 1.21E+08 | 415 | 410 | 1.21E+08 | 0.21345  | 0.003539 | 0 |
| chr6 | 1.21E+08 | 1.21E+08 | 313 | 429 | 1.21E+08 | -0.25885 | 0.000633 | 0 |
| chr6 | 1.21E+08 | 1.21E+08 | 321 | 432 | 1.21E+08 | -0.23249 | 0.001862 | 0 |
| chr6 | 1.22E+08 | 1.23E+08 | 435 | 573 | 1.22E+08 | -0.20156 | 0.005871 | 0 |
| chr6 | 1.23E+08 | 1.23E+08 | 420 | 551 | 1.23E+08 | -0.1957  | 0.007193 | 0 |
| chr6 | 1.24E+08 | 1.24E+08 | 387 | 511 | 1.24E+08 | -0.20503 | 0.005194 | 0 |
| chr6 | 1.24E+08 | 1.24E+08 | 460 | 608 | 1.24E+08 | -0.20647 | 0.004933 | 0 |
| chr6 | 1.24E+08 | 1.24E+08 | 432 | 564 | 1.24E+08 | -0.1887  | 0.009114 | 0 |
| chr6 | 1.25E+08 | 1.25E+08 | 431 | 570 | 1.25E+08 | -0.20731 | 0.004787 | 0 |
| chr6 | 1.25E+08 | 1.25E+08 | 456 | 596 | 1.25E+08 | -0.19032 | 0.008634 | 0 |
| chr6 | 1.26E+08 | 1.26E+08 | 461 | 637 | 1.26E+08 | -0.27056 | 0.000381 | 0 |
| chr6 | 1.26E+08 | 1.26E+08 | 696 | 656 | 1.26E+08 | 0.281355 | 0.000197 | 0 |
| chr6 | 1.27E+08 | 1.27E+08 | 479 | 649 | 1.27E+08 | -0.24223 | 0.001263 | 0 |
| chr6 | 1.27E+08 | 1.27E+08 | 374 | 523 | 1.27E+08 | -0.28781 | 0.000174 | 0 |
| chr6 | 1.27E+08 | 1.27E+08 | 412 | 562 | 1.27E+08 | -0.25196 | 0.000847 | 0 |
| chr6 | 1.27E+08 | 1.27E+08 | 432 | 592 | 1.27E+08 | -0.2586  | 0.00064  | 0 |
| chr6 | 1.27E+08 | 1.27E+08 | 445 | 597 | 1.27E+08 | -0.22796 | 0.00222  | 0 |
| chr6 | 1.28E+08 | 1.28E+08 | 433 | 601 | 1.28E+08 | -0.27703 | 0.000285 | 0 |
| chr6 | 1.31E+08 | 1.31E+08 | 405 | 543 | 1.31E+08 | -0.22707 | 0.002298 | 0 |
| chr6 | 1.32E+08 | 1.32E+08 | 370 | 504 | 1.32E+08 | -0.24994 | 0.000921 | 0 |
| chr6 | 1.32E+08 | 1.32E+08 | 376 | 490 | 1.32E+08 | -0.18609 | 0.009939 | 0 |
| chr6 | 1.33E+08 | 1.33E+08 | 467 | 617 | 1.33E+08 | -0.20588 | 0.005038 | 0 |
| chr6 | 1.34E+08 | 1.34E+08 | 682 | 675 | 1.34E+08 | 0.210847 | 0.003902 | 0 |
| chr6 | 1.36E+08 | 1.36E+08 | 457 | 629 | 1.36E+08 | -0.2649  | 0.000488 | 0 |
| chr6 | 1.37E+08 | 1.37E+08 | 662 | 659 | 1.37E+08 | 0.202516 | 0.005298 | 0 |
| chr6 | 1.38E+08 | 1.38E+08 | 521 | 683 | 1.38E+08 | -0.19464 | 0.007458 | 0 |
| chr6 | 1.38E+08 | 1.38E+08 | 692 | 685 | 1.38E+08 | 0.210631 | 0.003933 | 0 |
| chr6 | 1.38E+08 | 1.38E+08 | 454 | 610 | 1.38E+08 | -0.23015 | 0.00204  | 0 |
| chr6 | 1.39E+08 | 1.39E+08 | 621 | 606 | 1.39E+08 | 0.231239 | 0.00177  | 0 |
| chr6 | 1.4E+08  | 1.4E+08  | 531 | 532 | 1.4E+08  | 0.193249 | 0.007361 | 0 |
| chr6 | 1.4E+08  | 1.41E+08 | 467 | 611 | 1.41E+08 | -0.19179 | 0.008217 | 0 |
| chr6 | 1.41E+08 | 1.41E+08 | 504 | 683 | 1.41E+08 | -0.2425  | 0.00125  | 0 |
| chr6 | 1.41E+08 | 1.41E+08 | 430 | 563 | 1.41E+08 | -0.19284 | 0.007931 | 0 |
| chr6 | 1.41E+08 | 1.42E+08 | 394 | 519 | 1.41E+08 | -0.20158 | 0.005867 | 0 |
| chr6 | 1.41E+08 | 1.42E+08 | 392 | 512 | 1.42E+08 | -0.18933 | 0.008925 | 0 |
| chr6 | 1.42E+08 | 1.42E+08 | 417 | 554 | 1.42E+08 | -0.21388 | 0.003773 | 0 |
| chr6 | 1.42E+08 | 1.42E+08 | 385 | 504 | 1.42E+08 | -0.1926  | 0.007993 | 0 |

|      |          |          |      |      |          |          |          |   |
|------|----------|----------|------|------|----------|----------|----------|---|
| chr6 | 1.42E+08 | 1.42E+08 | 390  | 537  | 1.42E+08 | -0.26548 | 0.000476 | 0 |
| chr6 | 1.42E+08 | 1.42E+08 | 409  | 544  | 1.42E+08 | -0.21554 | 0.003549 | 0 |
| chr6 | 1.44E+08 | 1.44E+08 | 482  | 634  | 1.44E+08 | -0.19949 | 0.006311 | 0 |
| chr6 | 1.45E+08 | 1.45E+08 | 476  | 630  | 1.45E+08 | -0.20843 | 0.004599 | 0 |
| chr6 | 1.45E+08 | 1.45E+08 | 462  | 650  | 1.45E+08 | -0.29658 | 0.000115 | 0 |
| chr6 | 1.46E+08 | 1.46E+08 | 458  | 610  | 1.46E+08 | -0.2175  | 0.0033   | 0 |
| chr6 | 1.46E+08 | 1.46E+08 | 500  | 662  | 1.46E+08 | -0.20894 | 0.004515 | 0 |
| chr6 | 1.46E+08 | 1.46E+08 | 446  | 609  | 1.46E+08 | -0.25344 | 0.000796 | 0 |
| chr6 | 1.46E+08 | 1.46E+08 | 484  | 669  | 1.46E+08 | -0.27104 | 0.000373 | 0 |
| chr6 | 1.47E+08 | 1.47E+08 | 401  | 524  | 1.47E+08 | -0.19    | 0.008726 | 0 |
| chr6 | 1.47E+08 | 1.48E+08 | 601  | 595  | 1.48E+08 | 0.210438 | 0.003962 | 0 |
| chr6 | 1.48E+08 | 1.48E+08 | 586  | 571  | 1.48E+08 | 0.233373 | 0.001624 | 0 |
| chr6 | 1.52E+08 | 1.52E+08 | 472  | 616  | 1.52E+08 | -0.18818 | 0.009273 | 0 |
| chr6 | 1.52E+08 | 1.52E+08 | 459  | 636  | 1.52E+08 | -0.27457 | 0.000319 | 0 |
| chr6 | 1.53E+08 | 1.53E+08 | 457  | 599  | 1.53E+08 | -0.1944  | 0.00752  | 0 |
| chr6 | 1.54E+08 | 1.54E+08 | 394  | 529  | 1.54E+08 | -0.22911 | 0.002124 | 0 |
| chr6 | 1.54E+08 | 1.54E+08 | 357  | 484  | 1.54E+08 | -0.24312 | 0.001219 | 0 |
| chr6 | 1.55E+08 | 1.55E+08 | 566  | 568  | 1.55E+08 | 0.190874 | 0.007993 | 0 |
| chr6 | 1.56E+08 | 1.56E+08 | 604  | 589  | 1.56E+08 | 0.232244 | 0.001699 | 0 |
| chr6 | 1.56E+08 | 1.56E+08 | 569  | 545  | 1.56E+08 | 0.258135 | 0.00057  | 0 |
| chr6 | 1.58E+08 | 1.58E+08 | 415  | 394  | 1.58E+08 | 0.270879 | 0.000321 | 0 |
| chr6 | 1.58E+08 | 1.58E+08 | 647  | 639  | 1.58E+08 | 0.213913 | 0.003478 | 0 |
| chr6 | 1.59E+08 | 1.59E+08 | 518  | 677  | 1.59E+08 | -0.19024 | 0.008656 | 0 |
| chr6 | 1.59E+08 | 1.59E+08 | 644  | 633  | 1.59E+08 | 0.220818 | 0.00267  | 0 |
| chr6 | 1.59E+08 | 1.59E+08 | 549  | 543  | 1.59E+08 | 0.211817 | 0.003763 | 0 |
| chr6 | 1.6E+08  | 1.6E+08  | 479  | 459  | 1.6E+08  | 0.257495 | 0.000586 | 0 |
| chr6 | 1.6E+08  | 1.6E+08  | 593  | 545  | 1.6E+08  | 0.317739 | 3.21E-05 | 0 |
| chr6 | 1.61E+08 | 1.61E+08 | 343  | 473  | 1.61E+08 | -0.26767 | 0.000433 | 0 |
| chr6 | 1.61E+08 | 1.61E+08 | 396  | 523  | 1.61E+08 | -0.20535 | 0.005135 | 0 |
| chr6 | 1.61E+08 | 1.61E+08 | 439  | 573  | 1.61E+08 | -0.18835 | 0.00922  | 0 |
| chr6 | 1.63E+08 | 1.63E+08 | 433  | 576  | 1.63E+08 | -0.21574 | 0.003523 | 0 |
| chr6 | 1.64E+08 | 1.64E+08 | 512  | 669  | 1.64E+08 | -0.1899  | 0.008756 | 0 |
| chr6 | 1.65E+08 | 1.65E+08 | 417  | 561  | 1.65E+08 | -0.23199 | 0.001899 | 0 |
| chr6 | 1.66E+08 | 1.66E+08 | 779  | 757  | 1.66E+08 | 0.237293 | 0.001384 | 0 |
| chr6 | 1.68E+08 | 1.68E+08 | 585  | 546  | 1.68E+08 | 0.295499 | 9.96E-05 | 0 |
| chr6 | 1.68E+08 | 1.68E+08 | 446  | 424  | 1.68E+08 | 0.268942 | 0.000351 | 0 |
| chr6 | 1.68E+08 | 1.68E+08 | 473  | 449  | 1.68E+08 | 0.271088 | 0.000318 | 0 |
| chr6 | 1.68E+08 | 1.68E+08 | 756  | 757  | 1.68E+08 | 0.194056 | 0.007157 | 0 |
| chr6 | 1.68E+08 | 1.68E+08 | 35   | 57   | 1.68E+08 | -0.50764 | 3.36E-10 | 0 |
| chr6 | 1.68E+08 | 1.68E+08 | 680  | 681  | 1.68E+08 | 0.193843 | 0.00721  | 0 |
| chr6 | 1.69E+08 | 1.69E+08 | 492  | 656  | 1.69E+08 | -0.21907 | 0.003112 | 0 |
| chr6 | 1.69E+08 | 1.69E+08 | 625  | 630  | 1.69E+08 | 0.184467 | 0.00994  | 0 |
| chr6 | 1.7E+08  | 1.7E+08  | 638  | 635  | 1.7E+08  | 0.202763 | 0.005251 | 0 |
| chr6 | 1.7E+08  | 1.7E+08  | 679  | 683  | 1.7E+08  | 0.187489 | 0.008975 | 0 |
| chr6 | 1.71E+08 | 1.71E+08 | 4    | 2    | 1.71E+08 | 1.195963 | 1.84E-42 | 0 |
| chr6 | 1.71E+08 | 1.71E+08 | 1    | 2    | 1.71E+08 | -0.80404 | 3.29E-21 | 0 |
| chr6 | 1250001  | 1350000  | 1329 | 1385 | 1300000  | 0.136418 | 0.042466 | 0 |

|      |          |          |      |      |          |          |          |   |
|------|----------|----------|------|------|----------|----------|----------|---|
| chr6 | 1300001  | 1400000  | 1309 | 1367 | 1350000  | 0.133415 | 0.046009 | 0 |
| chr6 | 1950001  | 2050000  | 1095 | 1375 | 2.00E+06 | -0.13254 | 0.048115 | 0 |
| chr6 | 2600001  | 2700000  | 1402 | 1435 | 2650000  | 0.162399 | 0.020157 | 0 |
| chr6 | 2750001  | 2850000  | 1399 | 1456 | 2800000  | 0.138349 | 0.040308 | 0 |
| chr6 | 2900001  | 3000000  | 1266 | 1318 | 2950000  | 0.13789  | 0.040812 | 0 |
| chr6 | 2950001  | 3050000  | 1318 | 1341 | 3.00E+06 | 0.171004 | 0.015426 | 0 |
| chr6 | 3250001  | 3350000  | 1433 | 1450 | 3300000  | 0.178949 | 0.011939 | 0 |
| chr6 | 3450001  | 3550000  | 1357 | 1408 | 3500000  | 0.142736 | 0.035734 | 0 |
| chr6 | 3750001  | 3850000  | 1357 | 1373 | 3800000  | 0.179052 | 0.011899 | 0 |
| chr6 | 3800001  | 3900000  | 1345 | 1383 | 3850000  | 0.155768 | 0.024597 | 0 |
| chr6 | 5900001  | 6000000  | 1033 | 1300 | 5950000  | -0.13571 | 0.04429  | 0 |
| chr6 | 6100001  | 6200000  | 892  | 1123 | 6150000  | -0.13628 | 0.043629 | 0 |
| chr6 | 6150001  | 6250000  | 904  | 1148 | 6200000  | -0.14876 | 0.031054 | 0 |
| chr6 | 6200001  | 6300000  | 968  | 1215 | 6250000  | -0.13191 | 0.048898 | 0 |
| chr6 | 6800001  | 6900000  | 1358 | 1387 | 6850000  | 0.165479 | 0.018338 | 0 |
| chr6 | 7100001  | 7200000  | 1324 | 1353 | 7150000  | 0.164704 | 0.018782 | 0 |
| chr6 | 8650001  | 8750000  | 940  | 1190 | 8700000  | -0.14427 | 0.035185 | 0 |
| chr6 | 9000001  | 9100000  | 934  | 1192 | 9050000  | -0.15593 | 0.025316 | 0 |
| chr6 | 9350001  | 9450000  | 970  | 1237 | 9400000  | -0.15483 | 0.026136 | 0 |
| chr6 | 9800001  | 9900000  | 832  | 1053 | 9850000  | -0.14389 | 0.035552 | 0 |
| chr6 | 9850001  | 9950000  | 867  | 1100 | 9900000  | -0.14744 | 0.03223  | 0 |
| chr6 | 10200001 | 10300000 | 1043 | 1316 | 10250000 | -0.13946 | 0.04009  | 0 |
| chr6 | 10350001 | 10450000 | 1300 | 1342 | 10400000 | 0.15009  | 0.029028 | 0 |
| chr6 | 13550001 | 13650000 | 1332 | 1389 | 13600000 | 0.135511 | 0.043513 | 0 |
| chr6 | 15200001 | 15300000 | 1031 | 1077 | 15250000 | 0.132989 | 0.04653  | 0 |
| chr6 | 15600001 | 15700000 | 1178 | 1229 | 15650000 | 0.134818 | 0.044326 | 0 |
| chr6 | 17550001 | 17650000 | 1100 | 1142 | 17600000 | 0.141904 | 0.036567 | 0 |
| chr6 | 17600001 | 17700000 | 1162 | 1216 | 17650000 | 0.13043  | 0.049762 | 0 |
| chr6 | 17900001 | 18000000 | 1259 | 1296 | 17950000 | 0.154176 | 0.025778 | 0 |
| chr6 | 18600001 | 18700000 | 1044 | 1322 | 18650000 | -0.14464 | 0.034827 | 0 |
| chr6 | 18850001 | 18950000 | 845  | 1078 | 18900000 | -0.15537 | 0.025727 | 0 |
| chr6 | 19450001 | 19550000 | 833  | 1052 | 19500000 | -0.14078 | 0.038684 | 0 |
| chr6 | 20250001 | 20350000 | 756  | 950  | 20300000 | -0.13358 | 0.046832 | 0 |
| chr6 | 20350001 | 20450000 | 930  | 971  | 20400000 | 0.133722 | 0.045636 | 0 |
| chr6 | 21150001 | 21250000 | 776  | 990  | 21200000 | -0.15541 | 0.025699 | 0 |
| chr6 | 21300001 | 21400000 | 667  | 838  | 21350000 | -0.1333  | 0.047172 | 0 |
| chr6 | 21850001 | 21950000 | 632  | 803  | 21900000 | -0.14951 | 0.030409 | 0 |
| chr6 | 22150001 | 22250000 | 582  | 748  | 22200000 | -0.16606 | 0.018745 | 0 |
| chr6 | 22450001 | 22550000 | 603  | 784  | 22500000 | -0.18273 | 0.011094 | 0 |
| chr6 | 22750001 | 22850000 | 663  | 850  | 22800000 | -0.16249 | 0.020869 | 0 |
| chr6 | 22850001 | 22950000 | 683  | 864  | 22900000 | -0.14318 | 0.036244 | 0 |
| chr6 | 22950001 | 23050000 | 600  | 781  | 2.30E+07 | -0.1844  | 0.010507 | 0 |
| chr6 | 23400001 | 23500000 | 625  | 798  | 23450000 | -0.15657 | 0.024848 | 0 |
| chr6 | 23450001 | 23550000 | 648  | 843  | 23500000 | -0.18358 | 0.010794 | 0 |
| chr6 | 23500001 | 23600000 | 648  | 823  | 23550000 | -0.14894 | 0.030906 | 0 |
| chr6 | 23900001 | 24000000 | 666  | 848  | 23950000 | -0.15258 | 0.027877 | 0 |
| chr6 | 24300001 | 24400000 | 839  | 867  | 24350000 | 0.148602 | 0.030293 | 0 |

|      |          |          |      |      |          |          |          |   |
|------|----------|----------|------|------|----------|----------|----------|---|
| chr6 | 25450001 | 25550000 | 781  | 980  | 25500000 | -0.1315  | 0.049428 | 0 |
| chr6 | 26300001 | 26400000 | 895  | 923  | 26350000 | 0.15152  | 0.027854 | 0 |
| chr6 | 26350001 | 26450000 | 860  | 873  | 26400000 | 0.174318 | 0.013877 | 0 |
| chr6 | 26550001 | 26650000 | 919  | 934  | 26600000 | 0.172605 | 0.01466  | 0 |
| chr6 | 26750001 | 26850000 | 74   | 77   | 26800000 | 0.13863  | 0.040001 | 0 |
| chr6 | 27400001 | 27500000 | 887  | 926  | 27450000 | 0.133885 | 0.045439 | 0 |
| chr6 | 27500001 | 27600000 | 878  | 913  | 27550000 | 0.139569 | 0.03899  | 0 |
| chr6 | 27600001 | 27700000 | 819  | 828  | 27650000 | 0.180196 | 0.011459 | 0 |
| chr6 | 27750001 | 27850000 | 834  | 860  | 27800000 | 0.151674 | 0.02773  | 0 |
| chr6 | 28250001 | 28350000 | 944  | 985  | 28300000 | 0.134626 | 0.044552 | 0 |
| chr6 | 28650001 | 28750000 | 813  | 842  | 28700000 | 0.145398 | 0.033173 | 0 |
| chr6 | 28700001 | 28800000 | 770  | 802  | 28750000 | 0.137219 | 0.04156  | 0 |
| chr6 | 28850001 | 28950000 | 815  | 843  | 28900000 | 0.14723  | 0.031499 | 0 |
| chr6 | 28900001 | 29000000 | 866  | 895  | 28950000 | 0.148442 | 0.030431 | 0 |
| chr6 | 29600001 | 29700000 | 863  | 882  | 29650000 | 0.164545 | 0.018874 | 0 |
| chr6 | 30700001 | 30800000 | 944  | 973  | 30750000 | 0.15231  | 0.027222 | 0 |
| chr6 | 30850001 | 30950000 | 1124 | 1165 | 30900000 | 0.144275 | 0.034234 | 0 |
| chr6 | 31050001 | 31150000 | 1015 | 1058 | 31100000 | 0.136103 | 0.042827 | 0 |
| chr6 | 31300001 | 31400000 | 814  | 850  | 31350000 | 0.133529 | 0.04587  | 0 |
| chr6 | 31350001 | 31450000 | 886  | 909  | 31400000 | 0.158989 | 0.022347 | 0 |
| chr6 | 31400001 | 31500000 | 866  | 874  | 31450000 | 0.182697 | 0.010547 | 0 |
| chr6 | 31950001 | 32050000 | 373  | 386  | 3.20E+07 | 0.146538 | 0.032123 | 0 |
| chr6 | 32000001 | 32100000 | 914  | 922  | 32050000 | 0.18339  | 0.010306 | 0 |
| chr6 | 32150001 | 32250000 | 897  | 912  | 32200000 | 0.172037 | 0.014928 | 0 |
| chr6 | 32600001 | 32700000 | 676  | 705  | 32650000 | 0.135363 | 0.043685 | 0 |
| chr6 | 32750001 | 32850000 | 978  | 1016 | 32800000 | 0.140969 | 0.037522 | 0 |
| chr6 | 32900001 | 33000000 | 1031 | 1062 | 32950000 | 0.153224 | 0.026507 | 0 |
| chr6 | 33450001 | 33550000 | 794  | 814  | 33500000 | 0.160073 | 0.02163  | 0 |
| chr6 | 33550001 | 33650000 | 1139 | 1182 | 33600000 | 0.142501 | 0.035968 | 0 |
| chr6 | 33600001 | 33700000 | 1249 | 1269 | 33650000 | 0.173044 | 0.014456 | 0 |
| chr6 | 33650001 | 33750000 | 1218 | 1254 | 33700000 | 0.15394  | 0.025957 | 0 |
| chr6 | 33700001 | 33800000 | 1240 | 1252 | 33750000 | 0.182069 | 0.01077  | 0 |
| chr6 | 33850001 | 33950000 | 1111 | 1162 | 33900000 | 0.131212 | 0.048756 | 0 |
| chr6 | 33900001 | 34000000 | 1150 | 1191 | 33950000 | 0.145423 | 0.033149 | 0 |
| chr6 | 34100001 | 34200000 | 960  | 969  | 34150000 | 0.182501 | 0.010616 | 0 |
| chr6 | 34150001 | 34250000 | 861  | 888  | 34200000 | 0.151417 | 0.027937 | 0 |
| chr6 | 34600001 | 34700000 | 845  | 859  | 34650000 | 0.172256 | 0.014824 | 0 |
| chr6 | 34700001 | 34800000 | 814  | 847  | 34750000 | 0.13863  | 0.040001 | 0 |
| chr6 | 34850001 | 34950000 | 975  | 1007 | 34900000 | 0.149373 | 0.029631 | 0 |
| chr6 | 35150001 | 35250000 | 1078 | 1104 | 35200000 | 0.16158  | 0.020666 | 0 |
| chr6 | 35600001 | 35700000 | 895  | 935  | 35650000 | 0.132884 | 0.046659 | 0 |
| chr6 | 35700001 | 35800000 | 873  | 900  | 35750000 | 0.15202  | 0.027453 | 0 |
| chr6 | 35750001 | 35850000 | 860  | 870  | 35800000 | 0.179284 | 0.011808 | 0 |
| chr6 | 35800001 | 35900000 | 884  | 894  | 35850000 | 0.179735 | 0.011635 | 0 |
| chr6 | 36300001 | 36400000 | 1016 | 1046 | 36350000 | 0.153981 | 0.025926 | 0 |
| chr6 | 36450001 | 36550000 | 924  | 965  | 36500000 | 0.133327 | 0.046116 | 0 |
| chr6 | 36600001 | 36700000 | 1045 | 1068 | 36650000 | 0.164554 | 0.018869 | 0 |

|      |          |          |      |      |          |          |          |   |
|------|----------|----------|------|------|----------|----------|----------|---|
| chr6 | 36700001 | 36800000 | 1174 | 1227 | 36750000 | 0.13226  | 0.047433 | 0 |
| chr6 | 36900001 | 37000000 | 1161 | 1173 | 36950000 | 0.181128 | 0.011112 | 0 |
| chr6 | 37150001 | 37250000 | 923  | 935  | 37200000 | 0.177327 | 0.012589 | 0 |
| chr6 | 37250001 | 37350000 | 984  | 1025 | 37300000 | 0.137069 | 0.041728 | 0 |
| chr6 | 37450001 | 37550000 | 1136 | 1174 | 37500000 | 0.148493 | 0.030387 | 0 |
| chr6 | 37700001 | 37800000 | 966  | 1011 | 37750000 | 0.130275 | 0.049963 | 0 |
| chr6 | 37750001 | 37850000 | 927  | 947  | 37800000 | 0.165168 | 0.018515 | 0 |
| chr6 | 37800001 | 37900000 | 861  | 886  | 37850000 | 0.15467  | 0.025407 | 0 |
| chr6 | 38000001 | 38100000 | 901  | 928  | 38050000 | 0.153365 | 0.026397 | 0 |
| chr6 | 38350001 | 38450000 | 737  | 932  | 38400000 | -0.1427  | 0.036722 | 0 |
| chr6 | 38600001 | 38700000 | 861  | 897  | 38650000 | 0.136868 | 0.041955 | 0 |
| chr6 | 39500001 | 39600000 | 662  | 842  | 39550000 | -0.15103 | 0.029136 | 0 |
| chr6 | 39650001 | 39750000 | 710  | 738  | 39700000 | 0.140161 | 0.038364 | 0 |
| chr6 | 40050001 | 40150000 | 723  | 931  | 40100000 | -0.16882 | 0.017227 | 0 |
| chr6 | 40850001 | 40950000 | 852  | 1102 | 40900000 | -0.17524 | 0.014109 | 0 |
| chr6 | 41000001 | 41100000 | 988  | 1016 | 41050000 | 0.155646 | 0.024687 | 0 |
| chr6 | 41050001 | 41150000 | 930  | 966  | 41100000 | 0.141171 | 0.037315 | 0 |
| chr6 | 41850001 | 41950000 | 953  | 961  | 41900000 | 0.183903 | 0.010131 | 0 |
| chr6 | 42000001 | 42100000 | 973  | 989  | 42050000 | 0.172432 | 0.014741 | 0 |
| chr6 | 42100001 | 42200000 | 901  | 919  | 42150000 | 0.167425 | 0.017263 | 0 |
| chr6 | 42200001 | 42300000 | 1004 | 1028 | 42250000 | 0.161882 | 0.020477 | 0 |
| chr6 | 42750001 | 42850000 | 856  | 870  | 42800000 | 0.172558 | 0.014682 | 0 |
| chr6 | 42950001 | 43050000 | 1030 | 1041 | 4.30E+07 | 0.180637 | 0.011293 | 0 |
| chr6 | 43350001 | 43450000 | 899  | 934  | 43400000 | 0.140862 | 0.037633 | 0 |
| chr6 | 43400001 | 43500000 | 1043 | 1058 | 43450000 | 0.175363 | 0.013418 | 0 |
| chr6 | 43450001 | 43550000 | 966  | 974  | 43500000 | 0.184064 | 0.010076 | 0 |
| chr6 | 43600001 | 43700000 | 1074 | 1113 | 43650000 | 0.144503 | 0.034016 | 0 |
| chr6 | 43750001 | 43850000 | 1205 | 1247 | 43800000 | 0.146535 | 0.032126 | 0 |
| chr6 | 43900001 | 44000000 | 1243 | 1265 | 43950000 | 0.170652 | 0.015599 | 0 |
| chr6 | 44000001 | 44100000 | 1261 | 1274 | 44050000 | 0.181166 | 0.011098 | 0 |
| chr6 | 44650001 | 44750000 | 671  | 844  | 44700000 | -0.13497 | 0.045162 | 0 |
| chr6 | 46000001 | 46100000 | 702  | 893  | 46050000 | -0.15123 | 0.028971 | 0 |
| chr6 | 46200001 | 46300000 | 759  | 963  | 46250000 | -0.14747 | 0.032197 | 0 |
| chr6 | 46300001 | 46400000 | 708  | 902  | 46350000 | -0.15342 | 0.027218 | 0 |
| chr6 | 46850001 | 46950000 | 795  | 1024 | 46900000 | -0.16923 | 0.017015 | 0 |
| chr6 | 47750001 | 47850000 | 735  | 956  | 47800000 | -0.1833  | 0.01089  | 0 |
| chr6 | 47950001 | 48050000 | 639  | 803  | 4.80E+07 | -0.13362 | 0.04678  | 0 |
| chr6 | 48000001 | 48100000 | 614  | 794  | 48050000 | -0.17494 | 0.014242 | 0 |
| chr6 | 48100001 | 48200000 | 635  | 818  | 48150000 | -0.16938 | 0.016934 | 0 |
| chr6 | 48250001 | 48350000 | 614  | 777  | 48300000 | -0.14371 | 0.035722 | 0 |
| chr6 | 48350001 | 48450000 | 610  | 785  | 48400000 | -0.16792 | 0.01771  | 0 |
| chr6 | 49050001 | 49150000 | 576  | 725  | 49100000 | -0.13595 | 0.04401  | 0 |
| chr6 | 49250001 | 49350000 | 618  | 788  | 49300000 | -0.15463 | 0.026287 | 0 |
| chr6 | 49650001 | 49750000 | 600  | 759  | 49700000 | -0.14317 | 0.036252 | 0 |
| chr6 | 50700001 | 50800000 | 675  | 849  | 50750000 | -0.13491 | 0.045225 | 0 |
| chr6 | 51100001 | 51200000 | 651  | 843  | 51150000 | -0.17691 | 0.013379 | 0 |
| chr6 | 51350001 | 51450000 | 664  | 861  | 51400000 | -0.17887 | 0.01257  | 0 |



|      |          |          |      |      |          |          |          |   |
|------|----------|----------|------|------|----------|----------|----------|---|
| chr6 | 51450001 | 51550000 | 589  | 740  | 51500000 | -0.13329 | 0.047179 | 0 |
| chr6 | 51600001 | 51700000 | 678  | 858  | 51650000 | -0.14373 | 0.035706 | 0 |
| chr6 | 51900001 | 52000000 | 741  | 933  | 51950000 | -0.13644 | 0.043443 | 0 |
| chr6 | 52050001 | 52150000 | 783  | 1015 | 52100000 | -0.17843 | 0.012746 | 0 |
| chr6 | 52300001 | 52400000 | 942  | 957  | 52350000 | 0.173171 | 0.014397 | 0 |
| chr6 | 52350001 | 52450000 | 1091 | 1100 | 52400000 | 0.184111 | 0.01006  | 0 |
| chr6 | 53050001 | 53150000 | 876  | 898  | 53100000 | 0.160178 | 0.021561 | 0 |
| chr6 | 54050001 | 54150000 | 655  | 830  | 54100000 | -0.14565 | 0.033865 | 0 |
| chr6 | 54200001 | 54300000 | 673  | 852  | 54250000 | -0.14428 | 0.035167 | 0 |
| chr6 | 54800001 | 54900000 | 582  | 744  | 54850000 | -0.15832 | 0.02361  | 0 |
| chr6 | 54850001 | 54950000 | 633  | 796  | 54900000 | -0.1346  | 0.045599 | 0 |
| chr6 | 55250001 | 55350000 | 750  | 959  | 55300000 | -0.15868 | 0.023364 | 0 |
| chr6 | 55300001 | 55400000 | 745  | 962  | 55350000 | -0.17283 | 0.015214 | 0 |
| chr6 | 55350001 | 55450000 | 723  | 942  | 55400000 | -0.18577 | 0.010044 | 0 |
| chr6 | 55400001 | 55500000 | 681  | 868  | 55450000 | -0.15408 | 0.026705 | 0 |
| chr6 | 55450001 | 55550000 | 668  | 852  | 55500000 | -0.15504 | 0.025973 | 0 |
| chr6 | 55800001 | 55900000 | 708  | 891  | 55850000 | -0.13571 | 0.044285 | 0 |
| chr6 | 56000001 | 56100000 | 672  | 858  | 56050000 | -0.15655 | 0.02486  | 0 |
| chr6 | 56050001 | 56150000 | 688  | 884  | 56100000 | -0.16567 | 0.018963 | 0 |
| chr6 | 56100001 | 56200000 | 725  | 927  | 56150000 | -0.15863 | 0.0234   | 0 |
| chr6 | 56250001 | 56350000 | 816  | 1031 | 56300000 | -0.14144 | 0.038003 | 0 |
| chr6 | 56300001 | 56400000 | 809  | 1035 | 56350000 | -0.15946 | 0.022835 | 0 |
| chr6 | 56550001 | 56650000 | 869  | 879  | 56600000 | 0.179456 | 0.011742 | 0 |
| chr6 | 56850001 | 56950000 | 872  | 910  | 56900000 | 0.134425 | 0.044792 | 0 |
| chr6 | 56900001 | 57000000 | 891  | 902  | 56950000 | 0.178261 | 0.012211 | 0 |
| chr6 | 57100001 | 57200000 | 795  | 826  | 57150000 | 0.140776 | 0.037722 | 0 |
| chr6 | 61800001 | 61900000 | 102  | 129  | 61850000 | -0.14284 | 0.036586 | 0 |
| chr6 | 61950001 | 62050000 | 475  | 613  | 6.20E+07 | -0.172   | 0.015617 | 0 |
| chr6 | 62700001 | 62800000 | 552  | 703  | 62750000 | -0.15289 | 0.027627 | 0 |
| chr6 | 63150001 | 63250000 | 589  | 739  | 63200000 | -0.13134 | 0.049623 | 0 |
| chr6 | 63200001 | 63300000 | 525  | 674  | 63250000 | -0.16447 | 0.019667 | 0 |
| chr6 | 63350001 | 63450000 | 580  | 752  | 63400000 | -0.17872 | 0.012631 | 0 |
| chr6 | 63400001 | 63500000 | 597  | 760  | 63450000 | -0.15231 | 0.028095 | 0 |
| chr6 | 63750001 | 63850000 | 579  | 733  | 63800000 | -0.14429 | 0.035164 | 0 |
| chr6 | 63800001 | 63900000 | 648  | 841  | 63850000 | -0.18015 | 0.012063 | 0 |
| chr6 | 63850001 | 63950000 | 609  | 792  | 63900000 | -0.1831  | 0.010964 | 0 |
| chr6 | 64200001 | 64300000 | 852  | 866  | 64250000 | 0.172449 | 0.014733 | 0 |
| chr6 | 64900001 | 65000000 | 627  | 798  | 64950000 | -0.15196 | 0.028373 | 0 |
| chr6 | 64950001 | 65050000 | 604  | 770  | 6.50E+07 | -0.15435 | 0.026499 | 0 |
| chr6 | 65100001 | 65200000 | 551  | 692  | 65150000 | -0.13276 | 0.047843 | 0 |
| chr6 | 65250001 | 65350000 | 590  | 751  | 65300000 | -0.15213 | 0.028232 | 0 |
| chr6 | 65300001 | 65400000 | 569  | 733  | 65350000 | -0.16942 | 0.016913 | 0 |
| chr6 | 65350001 | 65450000 | 560  | 724  | 65400000 | -0.1746  | 0.014394 | 0 |
| chr6 | 65700001 | 65800000 | 590  | 753  | 65750000 | -0.15597 | 0.025283 | 0 |
| chr6 | 65950001 | 66050000 | 407  | 527  | 6.60E+07 | -0.17681 | 0.013422 | 0 |
| chr6 | 66000001 | 66100000 | 436  | 562  | 66050000 | -0.17028 | 0.016471 | 0 |
| chr6 | 66150001 | 66250000 | 551  | 693  | 66200000 | -0.13484 | 0.045313 | 0 |

|      |          |          |     |      |          |          |          |   |
|------|----------|----------|-----|------|----------|----------|----------|---|
| chr6 | 66200001 | 66300000 | 528 | 680  | 66250000 | -0.16903 | 0.017115 | 0 |
| chr6 | 66600001 | 66700000 | 567 | 712  | 66650000 | -0.13257 | 0.048081 | 0 |
| chr6 | 66850001 | 66950000 | 557 | 723  | 66900000 | -0.18036 | 0.011983 | 0 |
| chr6 | 67350001 | 67450000 | 522 | 664  | 67400000 | -0.15117 | 0.029017 | 0 |
| chr6 | 67500001 | 67600000 | 538 | 680  | 67550000 | -0.14197 | 0.037466 | 0 |
| chr6 | 67550001 | 67650000 | 547 | 704  | 67600000 | -0.16807 | 0.017628 | 0 |
| chr6 | 67650001 | 67750000 | 563 | 720  | 67700000 | -0.1589  | 0.023212 | 0 |
| chr6 | 67750001 | 67850000 | 536 | 677  | 67800000 | -0.14096 | 0.0385   | 0 |
| chr6 | 67950001 | 68050000 | 568 | 721  | 6.80E+07 | -0.14815 | 0.031598 | 0 |
| chr6 | 68150001 | 68250000 | 562 | 717  | 68200000 | -0.15544 | 0.025676 | 0 |
| chr6 | 68200001 | 68300000 | 528 | 664  | 68250000 | -0.13468 | 0.0455   | 0 |
| chr6 | 68350001 | 68450000 | 552 | 711  | 68400000 | -0.16922 | 0.017019 | 0 |
| chr6 | 68700001 | 68800000 | 554 | 721  | 68750000 | -0.18415 | 0.010593 | 0 |
| chr6 | 68950001 | 69050000 | 548 | 703  | 6.90E+07 | -0.16339 | 0.020317 | 0 |
| chr6 | 69150001 | 69250000 | 492 | 640  | 69200000 | -0.18345 | 0.010838 | 0 |
| chr6 | 69200001 | 69300000 | 546 | 686  | 69250000 | -0.13334 | 0.047118 | 0 |
| chr6 | 69600001 | 69700000 | 597 | 754  | 69650000 | -0.14087 | 0.038593 | 0 |
| chr6 | 69800001 | 69900000 | 595 | 771  | 69850000 | -0.17788 | 0.012974 | 0 |
| chr6 | 69950001 | 70050000 | 611 | 780  | 7.00E+07 | -0.15634 | 0.025015 | 0 |
| chr6 | 70000001 | 70100000 | 603 | 785  | 70050000 | -0.18457 | 0.010447 | 0 |
| chr6 | 70050001 | 70150000 | 612 | 771  | 70100000 | -0.13724 | 0.042537 | 0 |
| chr6 | 70700001 | 70800000 | 580 | 731  | 70750000 | -0.13786 | 0.041843 | 0 |
| chr6 | 71000001 | 71100000 | 733 | 761  | 71050000 | 0.14188  | 0.036592 | 0 |
| chr6 | 71050001 | 71150000 | 842 | 852  | 71100000 | 0.17893  | 0.011946 | 0 |
| chr6 | 72000001 | 72100000 | 794 | 1005 | 72050000 | -0.14402 | 0.035421 | 0 |
| chr6 | 72150001 | 72250000 | 754 | 947  | 72200000 | -0.13284 | 0.047743 | 0 |
| chr6 | 72200001 | 72300000 | 732 | 921  | 72250000 | -0.13539 | 0.044658 | 0 |
| chr6 | 72250001 | 72350000 | 747 | 957  | 72300000 | -0.16145 | 0.021528 | 0 |
| chr6 | 72300001 | 72400000 | 763 | 990  | 72350000 | -0.17978 | 0.012206 | 0 |
| chr6 | 72500001 | 72600000 | 633 | 821  | 72550000 | -0.17921 | 0.012431 | 0 |
| chr6 | 72700001 | 72800000 | 629 | 801  | 72750000 | -0.15278 | 0.027718 | 0 |
| chr6 | 72750001 | 72850000 | 624 | 792  | 72800000 | -0.14799 | 0.031734 | 0 |
| chr6 | 72900001 | 73000000 | 631 | 817  | 72950000 | -0.17673 | 0.013456 | 0 |
| chr6 | 74600001 | 74700000 | 374 | 479  | 74650000 | -0.16102 | 0.0218   | 0 |
| chr6 | 74900001 | 75000000 | 406 | 525  | 74950000 | -0.17487 | 0.01427  | 0 |
| chr6 | 75250001 | 75350000 | 548 | 560  | 75300000 | 0.164712 | 0.018777 | 0 |
| chr6 | 75800001 | 75900000 | 609 | 629  | 75850000 | 0.149345 | 0.029655 | 0 |
| chr6 | 75900001 | 76000000 | 648 | 673  | 75950000 | 0.14135  | 0.03713  | 0 |
| chr6 | 76200001 | 76300000 | 549 | 570  | 76250000 | 0.141807 | 0.036665 | 0 |
| chr6 | 76400001 | 76500000 | 517 | 541  | 76450000 | 0.130499 | 0.049673 | 0 |
| chr6 | 76450001 | 76550000 | 549 | 573  | 76500000 | 0.134234 | 0.04502  | 0 |
| chr6 | 76750001 | 76850000 | 397 | 502  | 76800000 | -0.14259 | 0.036839 | 0 |
| chr6 | 77200001 | 77300000 | 420 | 536  | 77250000 | -0.15588 | 0.02535  | 0 |
| chr6 | 77450001 | 77550000 | 400 | 506  | 77500000 | -0.14317 | 0.036252 | 0 |
| chr6 | 77500001 | 77600000 | 387 | 494  | 77550000 | -0.15621 | 0.025106 | 0 |
| chr6 | 77600001 | 77700000 | 325 | 419  | 77650000 | -0.17055 | 0.016335 | 0 |
| chr6 | 77700001 | 77800000 | 368 | 463  | 77750000 | -0.13534 | 0.044718 | 0 |

|      |          |          |     |     |          |          |          |   |
|------|----------|----------|-----|-----|----------|----------|----------|---|
| chr6 | 77750001 | 77850000 | 369 | 463 | 77800000 | -0.13143 | 0.049515 | 0 |
| chr6 | 78200001 | 78300000 | 415 | 538 | 78250000 | -0.17853 | 0.012706 | 0 |
| chr6 | 78450001 | 78550000 | 346 | 445 | 78500000 | -0.16707 | 0.018176 | 0 |
| chr6 | 78900001 | 79000000 | 256 | 325 | 78950000 | -0.14833 | 0.031433 | 0 |
| chr6 | 79200001 | 79300000 | 409 | 532 | 79250000 | -0.18336 | 0.010869 | 0 |
| chr6 | 79250001 | 79350000 | 454 | 570 | 79300000 | -0.13231 | 0.048404 | 0 |
| chr6 | 79300001 | 79400000 | 421 | 531 | 79350000 | -0.13893 | 0.040662 | 0 |
| chr6 | 79550001 | 79650000 | 427 | 542 | 79600000 | -0.14809 | 0.031644 | 0 |
| chr6 | 79600001 | 79700000 | 426 | 546 | 79650000 | -0.16208 | 0.021123 | 0 |
| chr6 | 79700001 | 79800000 | 597 | 615 | 79750000 | 0.153108 | 0.026597 | 0 |
| chr6 | 79850001 | 79950000 | 514 | 651 | 79900000 | -0.14493 | 0.034552 | 0 |
| chr6 | 80250001 | 80350000 | 558 | 571 | 80300000 | 0.162737 | 0.01995  | 0 |
| chr6 | 80400001 | 80500000 | 475 | 615 | 80450000 | -0.1767  | 0.013471 | 0 |
| chr6 | 80450001 | 80550000 | 476 | 599 | 80500000 | -0.13563 | 0.04438  | 0 |
| chr6 | 82000001 | 82100000 | 462 | 478 | 82050000 | 0.146845 | 0.031845 | 0 |
| chr6 | 82200001 | 82300000 | 439 | 551 | 82250000 | -0.13187 | 0.048956 | 0 |
| chr6 | 82250001 | 82350000 | 459 | 584 | 82300000 | -0.15151 | 0.028738 | 0 |
| chr6 | 83050001 | 83150000 | 544 | 699 | 83100000 | -0.16572 | 0.018935 | 0 |
| chr6 | 83150001 | 83250000 | 449 | 568 | 83200000 | -0.14321 | 0.036215 | 0 |
| chr6 | 83700001 | 83800000 | 555 | 567 | 83750000 | 0.165102 | 0.018553 | 0 |
| chr6 | 83800001 | 83900000 | 593 | 603 | 83850000 | 0.171837 | 0.015023 | 0 |
| chr6 | 84000001 | 84100000 | 411 | 517 | 84050000 | -0.13506 | 0.045048 | 0 |
| chr6 | 84400001 | 84500000 | 465 | 596 | 84450000 | -0.16212 | 0.021102 | 0 |
| chr6 | 84750001 | 84850000 | 409 | 520 | 84800000 | -0.15045 | 0.029617 | 0 |
| chr6 | 84950001 | 85050000 | 464 | 583 | 8.50E+07 | -0.13341 | 0.04704  | 0 |
| chr6 | 85050001 | 85150000 | 443 | 569 | 85100000 | -0.16516 | 0.019261 | 0 |
| chr6 | 85600001 | 85700000 | 420 | 545 | 85650000 | -0.1799  | 0.012158 | 0 |
| chr6 | 85650001 | 85750000 | 425 | 549 | 85700000 | -0.17338 | 0.014956 | 0 |
| chr6 | 85700001 | 85800000 | 466 | 604 | 85750000 | -0.17826 | 0.012818 | 0 |
| chr6 | 86100001 | 86200000 | 658 | 684 | 86150000 | 0.140054 | 0.038476 | 0 |
| chr6 | 86450001 | 86550000 | 349 | 442 | 86500000 | -0.14486 | 0.034618 | 0 |
| chr6 | 86750001 | 86850000 | 406 | 524 | 86800000 | -0.17212 | 0.015555 | 0 |
| chr6 | 86800001 | 86900000 | 425 | 545 | 86850000 | -0.16283 | 0.020658 | 0 |
| chr6 | 87150001 | 87250000 | 379 | 493 | 87200000 | -0.18343 | 0.010846 | 0 |
| chr6 | 87200001 | 87300000 | 371 | 470 | 87250000 | -0.14528 | 0.034218 | 0 |
| chr6 | 87600001 | 87700000 | 496 | 513 | 87650000 | 0.147344 | 0.031398 | 0 |
| chr6 | 88600001 | 88700000 | 647 | 655 | 88650000 | 0.178234 | 0.012222 | 0 |
| chr6 | 88700001 | 88800000 | 508 | 646 | 88750000 | -0.15074 | 0.029371 | 0 |
| chr6 | 89200001 | 89300000 | 582 | 606 | 89250000 | 0.137664 | 0.041063 | 0 |
| chr6 | 89250001 | 89350000 | 604 | 632 | 89300000 | 0.130587 | 0.049559 | 0 |
| chr6 | 89450001 | 89550000 | 442 | 569 | 89500000 | -0.16842 | 0.017441 | 0 |
| chr6 | 89500001 | 89600000 | 472 | 594 | 89550000 | -0.13571 | 0.044285 | 0 |
| chr6 | 89600001 | 89700000 | 529 | 542 | 89650000 | 0.160938 | 0.021072 | 0 |
| chr6 | 90250001 | 90350000 | 603 | 631 | 90300000 | 0.130481 | 0.049696 | 0 |
| chr6 | 91400001 | 91500000 | 467 | 604 | 91450000 | -0.17516 | 0.014141 | 0 |
| chr6 | 91600001 | 91700000 | 525 | 547 | 91650000 | 0.13674  | 0.0421   | 0 |
| chr6 | 92550001 | 92650000 | 403 | 515 | 92600000 | -0.15783 | 0.023952 | 0 |

|      |          |          |     |     |          |          |          |   |
|------|----------|----------|-----|-----|----------|----------|----------|---|
| chr6 | 92750001 | 92850000 | 418 | 526 | 92800000 | -0.1356  | 0.044421 | 0 |
| chr6 | 92800001 | 92900000 | 437 | 564 | 92850000 | -0.1721  | 0.015567 | 0 |
| chr6 | 93400001 | 93500000 | 410 | 530 | 93450000 | -0.17441 | 0.014483 | 0 |
| chr6 | 93550001 | 93650000 | 400 | 508 | 93600000 | -0.14887 | 0.030967 | 0 |
| chr6 | 93600001 | 93700000 | 377 | 477 | 93650000 | -0.14346 | 0.035969 | 0 |
| chr6 | 93700001 | 93800000 | 382 | 497 | 93750000 | -0.18371 | 0.010746 | 0 |
| chr6 | 93800001 | 93900000 | 419 | 540 | 93850000 | -0.17005 | 0.01659  | 0 |
| chr6 | 93900001 | 94000000 | 413 | 537 | 93950000 | -0.18282 | 0.011064 | 0 |
| chr6 | 93950001 | 94050000 | 429 | 547 | 9.40E+07 | -0.1546  | 0.026306 | 0 |
| chr6 | 94050001 | 94150000 | 419 | 528 | 94100000 | -0.13762 | 0.042101 | 0 |
| chr6 | 94200001 | 94300000 | 395 | 502 | 94250000 | -0.14987 | 0.030103 | 0 |
| chr6 | 94250001 | 94350000 | 368 | 471 | 94300000 | -0.16006 | 0.022433 | 0 |
| chr6 | 94600001 | 94700000 | 427 | 537 | 94650000 | -0.13472 | 0.045452 | 0 |
| chr6 | 94650001 | 94750000 | 424 | 544 | 94700000 | -0.16358 | 0.0202   | 0 |
| chr6 | 94700001 | 94800000 | 416 | 525 | 94750000 | -0.13977 | 0.039754 | 0 |
| chr6 | 95100001 | 95200000 | 424 | 542 | 95150000 | -0.15827 | 0.023648 | 0 |
| chr6 | 95900001 | 96000000 | 407 | 513 | 95950000 | -0.13797 | 0.041719 | 0 |
| chr6 | 96150001 | 96250000 | 377 | 486 | 96200000 | -0.17043 | 0.016395 | 0 |
| chr6 | 96550001 | 96650000 | 407 | 519 | 96600000 | -0.15474 | 0.026198 | 0 |
| chr6 | 97750001 | 97850000 | 405 | 514 | 97800000 | -0.14788 | 0.03183  | 0 |
| chr6 | 97900001 | 98000000 | 461 | 600 | 97950000 | -0.18423 | 0.010564 | 0 |
| chr6 | 98000001 | 98100000 | 433 | 561 | 98050000 | -0.17767 | 0.01306  | 0 |
| chr6 | 98200001 | 98300000 | 455 | 466 | 98250000 | 0.1615   | 0.020716 | 0 |
| chr6 | 98300001 | 98400000 | 442 | 573 | 98350000 | -0.17853 | 0.012708 | 0 |
| chr6 | 98700001 | 98800000 | 484 | 629 | 98750000 | -0.18209 | 0.011329 | 0 |
| chr6 | 98750001 | 98850000 | 436 | 562 | 98800000 | -0.17028 | 0.016471 | 0 |
| chr6 | 99300001 | 99400000 | 526 | 545 | 99350000 | 0.14477  | 0.033763 | 0 |
| chr6 | 99700001 | 99800000 | 528 | 678 | 99750000 | -0.16478 | 0.01948  | 0 |
| chr6 | 1.01E+08 | 1.01E+08 | 510 | 640 | 1.01E+08 | -0.13161 | 0.049281 | 0 |
| chr6 | 1.02E+08 | 1.02E+08 | 440 | 568 | 1.02E+08 | -0.17242 | 0.01541  | 0 |
| chr6 | 1.02E+08 | 1.02E+08 | 509 | 659 | 1.02E+08 | -0.17665 | 0.013491 | 0 |
| chr6 | 1.02E+08 | 1.02E+08 | 469 | 605 | 1.02E+08 | -0.17138 | 0.015917 | 0 |
| chr6 | 1.02E+08 | 1.02E+08 | 481 | 604 | 1.02E+08 | -0.13255 | 0.048102 | 0 |
| chr6 | 1.02E+08 | 1.02E+08 | 435 | 561 | 1.02E+08 | -0.17102 | 0.016096 | 0 |
| chr6 | 1.02E+08 | 1.03E+08 | 436 | 550 | 1.02E+08 | -0.13914 | 0.040432 | 0 |
| chr6 | 1.03E+08 | 1.03E+08 | 428 | 541 | 1.03E+08 | -0.14205 | 0.037375 | 0 |
| chr6 | 1.03E+08 | 1.03E+08 | 402 | 505 | 1.03E+08 | -0.13312 | 0.047388 | 0 |
| chr6 | 1.04E+08 | 1.04E+08 | 420 | 535 | 1.04E+08 | -0.15319 | 0.027397 | 0 |
| chr6 | 1.04E+08 | 1.04E+08 | 358 | 464 | 1.04E+08 | -0.1782  | 0.01284  | 0 |
| chr6 | 1.04E+08 | 1.04E+08 | 365 | 474 | 1.04E+08 | -0.18103 | 0.011726 | 0 |
| chr6 | 1.04E+08 | 1.04E+08 | 361 | 467 | 1.04E+08 | -0.17546 | 0.014009 | 0 |
| chr6 | 1.04E+08 | 1.04E+08 | 372 | 473 | 1.04E+08 | -0.15057 | 0.029511 | 0 |
| chr6 | 1.04E+08 | 1.05E+08 | 429 | 545 | 1.04E+08 | -0.14932 | 0.030578 | 0 |
| chr6 | 1.05E+08 | 1.05E+08 | 408 | 518 | 1.05E+08 | -0.14842 | 0.031356 | 0 |
| chr6 | 1.05E+08 | 1.05E+08 | 398 | 501 | 1.05E+08 | -0.13608 | 0.04386  | 0 |
| chr6 | 1.05E+08 | 1.06E+08 | 393 | 498 | 1.05E+08 | -0.14565 | 0.033865 | 0 |
| chr6 | 1.05E+08 | 1.06E+08 | 458 | 576 | 1.06E+08 | -0.13476 | 0.04541  | 0 |

|      |          |          |     |     |          |          |          |   |
|------|----------|----------|-----|-----|----------|----------|----------|---|
| chr6 | 1.07E+08 | 1.07E+08 | 648 | 662 | 1.07E+08 | 0.165126 | 0.01854  | 0 |
| chr6 | 1.08E+08 | 1.08E+08 | 461 | 591 | 1.08E+08 | -0.16243 | 0.020908 | 0 |
| chr6 | 1.08E+08 | 1.08E+08 | 524 | 548 | 1.08E+08 | 0.131354 | 0.048575 | 0 |
| chr6 | 1.08E+08 | 1.08E+08 | 530 | 552 | 1.08E+08 | 0.137287 | 0.041483 | 0 |
| chr6 | 1.09E+08 | 1.09E+08 | 557 | 579 | 1.09E+08 | 0.140077 | 0.038452 | 0 |
| chr6 | 1.09E+08 | 1.09E+08 | 613 | 632 | 1.09E+08 | 0.151926 | 0.027528 | 0 |
| chr6 | 1.11E+08 | 1.11E+08 | 495 | 642 | 1.11E+08 | -0.17918 | 0.012444 | 0 |
| chr6 | 1.11E+08 | 1.11E+08 | 507 | 523 | 1.11E+08 | 0.151138 | 0.028163 | 0 |
| chr6 | 1.12E+08 | 1.12E+08 | 558 | 566 | 1.12E+08 | 0.175426 | 0.01339  | 0 |
| chr6 | 1.12E+08 | 1.12E+08 | 622 | 638 | 1.12E+08 | 0.159321 | 0.022125 | 0 |
| chr6 | 1.12E+08 | 1.12E+08 | 627 | 653 | 1.12E+08 | 0.137345 | 0.041418 | 0 |
| chr6 | 1.12E+08 | 1.12E+08 | 633 | 653 | 1.12E+08 | 0.151086 | 0.028206 | 0 |
| chr6 | 1.12E+08 | 1.12E+08 | 689 | 697 | 1.12E+08 | 0.179308 | 0.011799 | 0 |
| chr6 | 1.12E+08 | 1.12E+08 | 697 | 725 | 1.12E+08 | 0.139141 | 0.039449 | 0 |
| chr6 | 1.13E+08 | 1.13E+08 | 459 | 591 | 1.13E+08 | -0.1687  | 0.017291 | 0 |
| chr6 | 1.14E+08 | 1.14E+08 | 448 | 566 | 1.14E+08 | -0.14134 | 0.038106 | 0 |
| chr6 | 1.14E+08 | 1.14E+08 | 474 | 598 | 1.14E+08 | -0.1393  | 0.040264 | 0 |
| chr6 | 1.14E+08 | 1.15E+08 | 503 | 636 | 1.14E+08 | -0.14251 | 0.03692  | 0 |
| chr6 | 1.15E+08 | 1.15E+08 | 405 | 511 | 1.15E+08 | -0.13944 | 0.04011  | 0 |
| chr6 | 1.15E+08 | 1.15E+08 | 354 | 449 | 1.15E+08 | -0.147   | 0.032621 | 0 |
| chr6 | 1.16E+08 | 1.16E+08 | 424 | 547 | 1.16E+08 | -0.17151 | 0.015853 | 0 |
| chr6 | 1.17E+08 | 1.17E+08 | 522 | 542 | 1.17E+08 | 0.14172  | 0.036753 | 0 |
| chr6 | 1.17E+08 | 1.17E+08 | 532 | 554 | 1.17E+08 | 0.137503 | 0.041242 | 0 |
| chr6 | 1.17E+08 | 1.18E+08 | 487 | 624 | 1.18E+08 | -0.16166 | 0.021391 | 0 |
| chr6 | 1.18E+08 | 1.18E+08 | 579 | 730 | 1.18E+08 | -0.13837 | 0.041273 | 0 |
| chr6 | 1.18E+08 | 1.18E+08 | 632 | 646 | 1.18E+08 | 0.164353 | 0.018986 | 0 |
| chr6 | 1.18E+08 | 1.18E+08 | 582 | 600 | 1.18E+08 | 0.15202  | 0.027453 | 0 |
| chr6 | 1.18E+08 | 1.18E+08 | 448 | 468 | 1.18E+08 | 0.132953 | 0.046574 | 0 |
| chr6 | 1.18E+08 | 1.18E+08 | 448 | 571 | 1.18E+08 | -0.15403 | 0.026742 | 0 |
| chr6 | 1.19E+08 | 1.19E+08 | 493 | 627 | 1.19E+08 | -0.15091 | 0.029228 | 0 |
| chr6 | 1.19E+08 | 1.19E+08 | 464 | 604 | 1.19E+08 | -0.18446 | 0.010485 | 0 |
| chr6 | 1.19E+08 | 1.19E+08 | 445 | 577 | 1.19E+08 | -0.1788  | 0.012596 | 0 |
| chr6 | 1.2E+08  | 1.2E+08  | 361 | 453 | 1.2E+08  | -0.13155 | 0.049361 | 0 |
| chr6 | 1.2E+08  | 1.21E+08 | 377 | 488 | 1.21E+08 | -0.17635 | 0.013619 | 0 |
| chr6 | 1.21E+08 | 1.21E+08 | 335 | 432 | 1.21E+08 | -0.17091 | 0.016154 | 0 |
| chr6 | 1.21E+08 | 1.21E+08 | 321 | 411 | 1.21E+08 | -0.1606  | 0.022075 | 0 |
| chr6 | 1.21E+08 | 1.22E+08 | 345 | 447 | 1.21E+08 | -0.17772 | 0.013041 | 0 |
| chr6 | 1.21E+08 | 1.22E+08 | 371 | 481 | 1.22E+08 | -0.17865 | 0.012656 | 0 |
| chr6 | 1.22E+08 | 1.22E+08 | 392 | 492 | 1.22E+08 | -0.13184 | 0.04899  | 0 |
| chr6 | 1.22E+08 | 1.23E+08 | 429 | 549 | 1.23E+08 | -0.15987 | 0.022561 | 0 |
| chr6 | 1.23E+08 | 1.23E+08 | 575 | 586 | 1.23E+08 | 0.168624 | 0.016627 | 0 |
| chr6 | 1.23E+08 | 1.24E+08 | 434 | 545 | 1.23E+08 | -0.1326  | 0.04804  | 0 |
| chr6 | 1.24E+08 | 1.24E+08 | 446 | 568 | 1.24E+08 | -0.15288 | 0.027635 | 0 |
| chr6 | 1.24E+08 | 1.24E+08 | 449 | 574 | 1.24E+08 | -0.15837 | 0.023574 | 0 |
| chr6 | 1.24E+08 | 1.25E+08 | 449 | 569 | 1.24E+08 | -0.14575 | 0.033775 | 0 |
| chr6 | 1.25E+08 | 1.25E+08 | 411 | 535 | 1.25E+08 | -0.18444 | 0.010493 | 0 |
| chr6 | 1.25E+08 | 1.25E+08 | 447 | 573 | 1.25E+08 | -0.1623  | 0.02099  | 0 |

|      |          |          |     |     |          |          |          |   |
|------|----------|----------|-----|-----|----------|----------|----------|---|
| chr6 | 1.26E+08 | 1.26E+08 | 673 | 697 | 1.26E+08 | 0.145411 | 0.033161 | 0 |
| chr6 | 1.26E+08 | 1.26E+08 | 530 | 679 | 1.26E+08 | -0.16146 | 0.021522 | 0 |
| chr6 | 1.26E+08 | 1.26E+08 | 525 | 681 | 1.26E+08 | -0.17937 | 0.012367 | 0 |
| chr6 | 1.26E+08 | 1.27E+08 | 630 | 638 | 1.26E+08 | 0.177758 | 0.012413 | 0 |
| chr6 | 1.27E+08 | 1.27E+08 | 510 | 664 | 1.27E+08 | -0.18472 | 0.010396 | 0 |
| chr6 | 1.27E+08 | 1.27E+08 | 404 | 508 | 1.27E+08 | -0.13451 | 0.045706 | 0 |
| chr6 | 1.27E+08 | 1.27E+08 | 450 | 576 | 1.27E+08 | -0.16018 | 0.022351 | 0 |
| chr6 | 1.28E+08 | 1.28E+08 | 523 | 539 | 1.28E+08 | 0.152489 | 0.027081 | 0 |
| chr6 | 1.28E+08 | 1.28E+08 | 425 | 537 | 1.28E+08 | -0.1415  | 0.037946 | 0 |
| chr6 | 1.28E+08 | 1.28E+08 | 469 | 610 | 1.28E+08 | -0.18326 | 0.010906 | 0 |
| chr6 | 1.28E+08 | 1.28E+08 | 481 | 604 | 1.28E+08 | -0.13255 | 0.048102 | 0 |
| chr6 | 1.28E+08 | 1.28E+08 | 451 | 571 | 1.28E+08 | -0.1444  | 0.035055 | 0 |
| chr6 | 1.28E+08 | 1.29E+08 | 489 | 627 | 1.29E+08 | -0.16267 | 0.020759 | 0 |
| chr6 | 1.29E+08 | 1.29E+08 | 488 | 631 | 1.29E+08 | -0.1748  | 0.014306 | 0 |
| chr6 | 1.3E+08  | 1.3E+08  | 510 | 652 | 1.3E+08  | -0.15841 | 0.023547 | 0 |
| chr6 | 1.3E+08  | 1.3E+08  | 438 | 568 | 1.3E+08  | -0.179   | 0.012518 | 0 |
| chr6 | 1.3E+08  | 1.31E+08 | 494 | 501 | 1.31E+08 | 0.175663 | 0.013288 | 0 |
| chr6 | 1.31E+08 | 1.31E+08 | 447 | 466 | 1.31E+08 | 0.135908 | 0.043052 | 0 |
| chr6 | 1.31E+08 | 1.31E+08 | 461 | 588 | 1.31E+08 | -0.15509 | 0.02594  | 0 |
| chr6 | 1.31E+08 | 1.31E+08 | 455 | 589 | 1.31E+08 | -0.17644 | 0.013582 | 0 |
| chr6 | 1.31E+08 | 1.31E+08 | 430 | 547 | 1.31E+08 | -0.15124 | 0.028959 | 0 |
| chr6 | 1.32E+08 | 1.32E+08 | 507 | 528 | 1.32E+08 | 0.137411 | 0.041345 | 0 |
| chr6 | 1.32E+08 | 1.32E+08 | 537 | 548 | 1.32E+08 | 0.166709 | 0.017652 | 0 |
| chr6 | 1.32E+08 | 1.32E+08 | 361 | 463 | 1.32E+08 | -0.16305 | 0.020522 | 0 |
| chr6 | 1.32E+08 | 1.32E+08 | 468 | 599 | 1.32E+08 | -0.16008 | 0.022415 | 0 |
| chr6 | 1.32E+08 | 1.32E+08 | 409 | 521 | 1.32E+08 | -0.15322 | 0.027371 | 0 |
| chr6 | 1.33E+08 | 1.33E+08 | 529 | 665 | 1.33E+08 | -0.13412 | 0.04617  | 0 |
| chr6 | 1.33E+08 | 1.33E+08 | 556 | 578 | 1.33E+08 | 0.139978 | 0.038556 | 0 |
| chr6 | 1.33E+08 | 1.34E+08 | 473 | 599 | 1.33E+08 | -0.14475 | 0.034717 | 0 |
| chr6 | 1.34E+08 | 1.34E+08 | 669 | 688 | 1.34E+08 | 0.155561 | 0.024749 | 0 |
| chr6 | 1.34E+08 | 1.34E+08 | 580 | 603 | 1.34E+08 | 0.139858 | 0.038684 | 0 |
| chr6 | 1.35E+08 | 1.35E+08 | 552 | 700 | 1.35E+08 | -0.14672 | 0.032876 | 0 |
| chr6 | 1.36E+08 | 1.36E+08 | 552 | 695 | 1.36E+08 | -0.13638 | 0.043511 | 0 |
| chr6 | 1.36E+08 | 1.37E+08 | 544 | 686 | 1.36E+08 | -0.13864 | 0.040978 | 0 |
| chr6 | 1.37E+08 | 1.37E+08 | 644 | 664 | 1.37E+08 | 0.15184  | 0.027596 | 0 |
| chr6 | 1.37E+08 | 1.37E+08 | 547 | 702 | 1.37E+08 | -0.16397 | 0.019966 | 0 |
| chr6 | 1.38E+08 | 1.38E+08 | 551 | 698 | 1.38E+08 | -0.14521 | 0.034281 | 0 |
| chr6 | 1.39E+08 | 1.39E+08 | 482 | 613 | 1.39E+08 | -0.15089 | 0.029248 | 0 |
| chr6 | 1.39E+08 | 1.39E+08 | 583 | 610 | 1.39E+08 | 0.13065  | 0.049478 | 0 |
| chr6 | 1.39E+08 | 1.39E+08 | 525 | 659 | 1.39E+08 | -0.132   | 0.048792 | 0 |
| chr6 | 1.39E+08 | 1.39E+08 | 517 | 662 | 1.39E+08 | -0.1607  | 0.022008 | 0 |
| chr6 | 1.4E+08  | 1.4E+08  | 490 | 623 | 1.4E+08  | -0.15049 | 0.029584 | 0 |
| chr6 | 1.4E+08  | 1.4E+08  | 554 | 575 | 1.4E+08  | 0.142287 | 0.036182 | 0 |
| chr6 | 1.4E+08  | 1.41E+08 | 440 | 568 | 1.4E+08  | -0.17242 | 0.01541  | 0 |
| chr6 | 1.41E+08 | 1.41E+08 | 458 | 590 | 1.41E+08 | -0.1694  | 0.016921 | 0 |
| chr6 | 1.41E+08 | 1.41E+08 | 452 | 579 | 1.41E+08 | -0.16128 | 0.021637 | 0 |
| chr6 | 1.41E+08 | 1.41E+08 | 494 | 620 | 1.41E+08 | -0.13179 | 0.04905  | 0 |

|      |          |          |     |     |          |          |          |   |
|------|----------|----------|-----|-----|----------|----------|----------|---|
| chr6 | 1.41E+08 | 1.41E+08 | 505 | 646 | 1.41E+08 | -0.15929 | 0.022948 | 0 |
| chr6 | 1.41E+08 | 1.41E+08 | 451 | 584 | 1.41E+08 | -0.17688 | 0.013394 | 0 |
| chr6 | 1.41E+08 | 1.41E+08 | 400 | 507 | 1.41E+08 | -0.14602 | 0.033521 | 0 |
| chr6 | 1.41E+08 | 1.41E+08 | 417 | 537 | 1.41E+08 | -0.16891 | 0.01718  | 0 |
| chr6 | 1.42E+08 | 1.42E+08 | 439 | 557 | 1.42E+08 | -0.14749 | 0.032179 | 0 |
| chr6 | 1.42E+08 | 1.42E+08 | 439 | 555 | 1.42E+08 | -0.1423  | 0.037123 | 0 |
| chr6 | 1.42E+08 | 1.43E+08 | 556 | 581 | 1.43E+08 | 0.13251  | 0.047122 | 0 |
| chr6 | 1.43E+08 | 1.43E+08 | 541 | 555 | 1.43E+08 | 0.159104 | 0.02227  | 0 |
| chr6 | 1.43E+08 | 1.43E+08 | 505 | 523 | 1.43E+08 | 0.145435 | 0.033138 | 0 |
| chr6 | 1.43E+08 | 1.43E+08 | 456 | 594 | 1.43E+08 | -0.18547 | 0.010145 | 0 |
| chr6 | 1.44E+08 | 1.44E+08 | 660 | 673 | 1.44E+08 | 0.167823 | 0.01705  | 0 |
| chr6 | 1.44E+08 | 1.44E+08 | 681 | 702 | 1.44E+08 | 0.152147 | 0.027352 | 0 |
| chr6 | 1.44E+08 | 1.44E+08 | 518 | 662 | 1.44E+08 | -0.15792 | 0.023891 | 0 |
| chr6 | 1.44E+08 | 1.44E+08 | 594 | 612 | 1.44E+08 | 0.152894 | 0.026763 | 0 |
| chr6 | 1.45E+08 | 1.45E+08 | 461 | 596 | 1.45E+08 | -0.17458 | 0.014402 | 0 |
| chr6 | 1.45E+08 | 1.45E+08 | 443 | 575 | 1.45E+08 | -0.18029 | 0.012007 | 0 |
| chr6 | 1.45E+08 | 1.45E+08 | 450 | 584 | 1.45E+08 | -0.18008 | 0.012089 | 0 |
| chr6 | 1.45E+08 | 1.45E+08 | 411 | 531 | 1.45E+08 | -0.17361 | 0.014849 | 0 |
| chr6 | 1.45E+08 | 1.45E+08 | 435 | 561 | 1.45E+08 | -0.17102 | 0.016096 | 0 |
| chr6 | 1.45E+08 | 1.45E+08 | 465 | 593 | 1.45E+08 | -0.15484 | 0.026126 | 0 |
| chr6 | 1.46E+08 | 1.46E+08 | 536 | 554 | 1.46E+08 | 0.14831  | 0.030546 | 0 |
| chr6 | 1.47E+08 | 1.47E+08 | 450 | 584 | 1.47E+08 | -0.18008 | 0.012089 | 0 |
| chr6 | 1.47E+08 | 1.47E+08 | 438 | 556 | 1.47E+08 | -0.14819 | 0.031558 | 0 |
| chr6 | 1.47E+08 | 1.47E+08 | 486 | 631 | 1.47E+08 | -0.18072 | 0.011842 | 0 |
| chr6 | 1.5E+08  | 1.5E+08  | 583 | 733 | 1.5E+08  | -0.13435 | 0.045893 | 0 |
| chr6 | 1.5E+08  | 1.5E+08  | 601 | 625 | 1.5E+08  | 0.139472 | 0.039094 | 0 |
| chr6 | 1.51E+08 | 1.51E+08 | 542 | 547 | 1.51E+08 | 0.182715 | 0.010541 | 0 |
| chr6 | 1.51E+08 | 1.51E+08 | 615 | 620 | 1.51E+08 | 0.184281 | 0.010003 | 0 |
| chr6 | 1.51E+08 | 1.51E+08 | 594 | 621 | 1.51E+08 | 0.131833 | 0.047969 | 0 |
| chr6 | 1.52E+08 | 1.52E+08 | 469 | 606 | 1.52E+08 | -0.17377 | 0.014776 | 0 |
| chr6 | 1.52E+08 | 1.52E+08 | 493 | 640 | 1.52E+08 | -0.18052 | 0.011919 | 0 |
| chr6 | 1.53E+08 | 1.53E+08 | 446 | 570 | 1.53E+08 | -0.15796 | 0.023864 | 0 |
| chr6 | 1.54E+08 | 1.54E+08 | 471 | 591 | 1.54E+08 | -0.13147 | 0.049464 | 0 |
| chr6 | 1.55E+08 | 1.55E+08 | 583 | 591 | 1.55E+08 | 0.176301 | 0.013016 | 0 |
| chr6 | 1.55E+08 | 1.55E+08 | 577 | 590 | 1.55E+08 | 0.163819 | 0.0193   | 0 |
| chr6 | 1.55E+08 | 1.55E+08 | 486 | 626 | 1.55E+08 | -0.16924 | 0.017006 | 0 |
| chr6 | 1.56E+08 | 1.56E+08 | 459 | 594 | 1.56E+08 | -0.17601 | 0.013769 | 0 |
| chr6 | 1.57E+08 | 1.57E+08 | 425 | 552 | 1.57E+08 | -0.18124 | 0.011644 | 0 |
| chr6 | 1.57E+08 | 1.57E+08 | 506 | 640 | 1.57E+08 | -0.14297 | 0.036454 | 0 |
| chr6 | 1.57E+08 | 1.57E+08 | 631 | 651 | 1.57E+08 | 0.150945 | 0.028321 | 0 |
| chr6 | 1.58E+08 | 1.58E+08 | 631 | 654 | 1.58E+08 | 0.144312 | 0.034198 | 0 |
| chr6 | 1.59E+08 | 1.59E+08 | 549 | 574 | 1.59E+08 | 0.131718 | 0.048113 | 0 |
| chr6 | 1.6E+08  | 1.6E+08  | 594 | 616 | 1.6E+08  | 0.143496 | 0.034987 | 0 |
| chr6 | 1.6E+08  | 1.6E+08  | 597 | 622 | 1.6E+08  | 0.136779 | 0.042055 | 0 |
| chr6 | 1.61E+08 | 1.61E+08 | 465 | 592 | 1.61E+08 | -0.1524  | 0.028017 | 0 |
| chr6 | 1.61E+08 | 1.61E+08 | 271 | 344 | 1.61E+08 | -0.14815 | 0.031592 | 0 |
| chr6 | 1.61E+08 | 1.61E+08 | 377 | 482 | 1.61E+08 | -0.15851 | 0.023482 | 0 |

|      |          |          |      |      |          |          |          |   |
|------|----------|----------|------|------|----------|----------|----------|---|
| chr6 | 1.62E+08 | 1.63E+08 | 470  | 601  | 1.63E+08 | -0.15874 | 0.02332  | 0 |
| chr6 | 1.63E+08 | 1.63E+08 | 422  | 536  | 1.63E+08 | -0.14903 | 0.030827 | 0 |
| chr6 | 1.63E+08 | 1.63E+08 | 430  | 554  | 1.63E+08 | -0.16959 | 0.016827 | 0 |
| chr6 | 1.63E+08 | 1.63E+08 | 431  | 543  | 1.63E+08 | -0.1373  | 0.042464 | 0 |
| chr6 | 1.63E+08 | 1.63E+08 | 419  | 535  | 1.63E+08 | -0.15663 | 0.024808 | 0 |
| chr6 | 1.63E+08 | 1.64E+08 | 409  | 521  | 1.63E+08 | -0.15322 | 0.027371 | 0 |
| chr6 | 1.64E+08 | 1.64E+08 | 503  | 635  | 1.64E+08 | -0.14024 | 0.03926  | 0 |
| chr6 | 1.64E+08 | 1.64E+08 | 536  | 689  | 1.64E+08 | -0.16631 | 0.018602 | 0 |
| chr6 | 1.64E+08 | 1.64E+08 | 517  | 673  | 1.64E+08 | -0.18448 | 0.010479 | 0 |
| chr6 | 1.64E+08 | 1.65E+08 | 438  | 565  | 1.64E+08 | -0.17136 | 0.01593  | 0 |
| chr6 | 1.65E+08 | 1.65E+08 | 526  | 545  | 1.65E+08 | 0.14477  | 0.033763 | 0 |
| chr6 | 1.65E+08 | 1.65E+08 | 414  | 524  | 1.65E+08 | -0.14397 | 0.035469 | 0 |
| chr6 | 1.65E+08 | 1.65E+08 | 465  | 585  | 1.65E+08 | -0.13524 | 0.044836 | 0 |
| chr6 | 1.65E+08 | 1.65E+08 | 479  | 499  | 1.65E+08 | 0.136949 | 0.041864 | 0 |
| chr6 | 1.66E+08 | 1.66E+08 | 507  | 645  | 1.66E+08 | -0.15135 | 0.028869 | 0 |
| chr6 | 1.66E+08 | 1.66E+08 | 721  | 752  | 1.66E+08 | 0.13523  | 0.043841 | 0 |
| chr6 | 1.66E+08 | 1.66E+08 | 740  | 773  | 1.66E+08 | 0.13302  | 0.046492 | 0 |
| chr6 | 1.66E+08 | 1.66E+08 | 735  | 751  | 1.66E+08 | 0.164894 | 0.018672 | 0 |
| chr6 | 1.66E+08 | 1.67E+08 | 709  | 736  | 1.66E+08 | 0.142043 | 0.036427 | 0 |
| chr6 | 1.67E+08 | 1.67E+08 | 700  | 723  | 1.67E+08 | 0.149322 | 0.029675 | 0 |
| chr6 | 1.67E+08 | 1.67E+08 | 603  | 622  | 1.67E+08 | 0.151206 | 0.028108 | 0 |
| chr6 | 1.68E+08 | 1.68E+08 | 817  | 842  | 1.68E+08 | 0.152479 | 0.027089 | 0 |
| chr6 | 1.68E+08 | 1.68E+08 | 673  | 700  | 1.68E+08 | 0.139215 | 0.039369 | 0 |
| chr6 | 1.68E+08 | 1.68E+08 | 677  | 694  | 1.68E+08 | 0.160183 | 0.021558 | 0 |
| chr6 | 1.68E+08 | 1.69E+08 | 662  | 679  | 1.68E+08 | 0.159383 | 0.022084 | 0 |
| chr6 | 1.68E+08 | 1.69E+08 | 672  | 686  | 1.69E+08 | 0.166216 | 0.017925 | 0 |
| chr6 | 1.69E+08 | 1.69E+08 | 595  | 608  | 1.69E+08 | 0.164781 | 0.018737 | 0 |
| chr6 | 1.69E+08 | 1.69E+08 | 653  | 666  | 1.69E+08 | 0.167524 | 0.01721  | 0 |
| chr6 | 1.69E+08 | 1.69E+08 | 528  | 664  | 1.69E+08 | -0.13468 | 0.0455   | 0 |
| chr6 | 1.69E+08 | 1.69E+08 | 579  | 594  | 1.69E+08 | 0.159063 | 0.022297 | 0 |
| chr6 | 1.69E+08 | 1.69E+08 | 585  | 607  | 1.69E+08 | 0.142703 | 0.035767 | 0 |
| chr6 | 1.7E+08  | 1.7E+08  | 624  | 636  | 1.7E+08  | 0.168482 | 0.016702 | 0 |
| chr6 | 1.7E+08  | 1.7E+08  | 635  | 654  | 1.7E+08  | 0.153429 | 0.026348 | 0 |
| chr6 | 1.7E+08  | 1.71E+08 | 651  | 672  | 1.71E+08 | 0.150159 | 0.02897  | 0 |
| chr6 | 1.71E+08 | 1.71E+08 | 602  | 610  | 1.71E+08 | 0.176917 | 0.012758 | 0 |
| chr6 | 1.71E+08 | 1.71E+08 | 582  | 597  | 1.71E+08 | 0.159251 | 0.022172 | 0 |
| chr6 | 1.71E+08 | 1.71E+08 | 374  | 378  | 1.71E+08 | 0.180615 | 0.011302 | 0 |
| chr6 | 1.71E+08 | 1.71E+08 | 73   | 92   | 1.71E+08 | -0.13777 | 0.041933 | 0 |
| chr7 | 50001    | 150000   | 1040 | 1032 | 1.00E+05 | 0.207104 | 0.004482 | 0 |
| chr7 | 100001   | 200000   | 1196 | 1150 | 150000   | 0.252547 | 0.000727 | 0 |
| chr7 | 150001   | 250000   | 972  | 949  | 2.00E+05 | 0.230511 | 0.001822 | 0 |
| chr7 | 250001   | 350000   | 761  | 755  | 3.00E+05 | 0.207383 | 0.004436 | 0 |
| chr7 | 300001   | 400000   | 1133 | 1093 | 350000   | 0.247817 | 0.000891 | 0 |
| chr7 | 350001   | 450000   | 1108 | 1100 | 4.00E+05 | 0.206417 | 0.004597 | 0 |
| chr7 | 450001   | 550000   | 1184 | 1189 | 5.00E+05 | 0.189883 | 0.00827  | 0 |
| chr7 | 500001   | 600000   | 1198 | 1160 | 550000   | 0.242466 | 0.001117 | 0 |
| chr7 | 550001   | 650000   | 1118 | 1112 | 6.00E+05 | 0.203726 | 0.005071 | 0 |



|      |         |         |      |      |          |          |          |   |
|------|---------|---------|------|------|----------|----------|----------|---|
| chr7 | 750001  | 850000  | 1025 | 965  | 8.00E+05 | 0.282986 | 0.000183 | 0 |
| chr7 | 800001  | 900000  | 1063 | 992  | 850000   | 0.295693 | 9.86E-05 | 0 |
| chr7 | 850001  | 950000  | 1159 | 1129 | 9.00E+05 | 0.233798 | 0.001596 | 0 |
| chr7 | 900001  | 1000000 | 1184 | 1145 | 950000   | 0.244285 | 0.001035 | 0 |
| chr7 | 950001  | 1050000 | 1168 | 1095 | 1.00E+06 | 0.289072 | 0.000136 | 0 |
| chr7 | 1000001 | 1100000 | 1241 | 1133 | 1050000  | 0.327318 | 1.93E-05 | 0 |
| chr7 | 1050001 | 1150000 | 1219 | 1184 | 1100000  | 0.237992 | 0.001344 | 0 |
| chr7 | 1150001 | 1250000 | 933  | 886  | 1200000  | 0.270533 | 0.000326 | 0 |
| chr7 | 1200001 | 1300000 | 1072 | 982  | 1250000  | 0.322473 | 2.50E-05 | 0 |
| chr7 | 1250001 | 1350000 | 1178 | 1104 | 1300000  | 0.289562 | 0.000133 | 0 |
| chr7 | 1300001 | 1400000 | 1220 | 1151 | 1350000  | 0.279956 | 0.000211 | 0 |
| chr7 | 1450001 | 1550000 | 1331 | 1330 | 1500000  | 0.197047 | 0.006443 | 0 |
| chr7 | 1500001 | 1600000 | 1304 | 1224 | 1550000  | 0.287303 | 0.000148 | 0 |
| chr7 | 1550001 | 1650000 | 1207 | 1129 | 1600000  | 0.292343 | 0.000116 | 0 |
| chr7 | 1900001 | 2000000 | 1134 | 1140 | 1950000  | 0.18835  | 0.008716 | 0 |
| chr7 | 2200001 | 2300000 | 1168 | 1144 | 2250000  | 0.225916 | 0.002188 | 0 |
| chr7 | 2250001 | 2350000 | 1086 | 1031 | 2300000  | 0.270943 | 0.00032  | 0 |
| chr7 | 2300001 | 2400000 | 839  | 831  | 2350000  | 0.209785 | 0.004059 | 0 |
| chr7 | 2350001 | 2450000 | 906  | 863  | 2400000  | 0.266114 | 0.000399 | 0 |
| chr7 | 2400001 | 2500000 | 983  | 935  | 2450000  | 0.268188 | 0.000363 | 0 |
| chr7 | 2650001 | 2750000 | 1210 | 1166 | 2700000  | 0.249402 | 0.000833 | 0 |
| chr7 | 2700001 | 2800000 | 1058 | 1062 | 2750000  | 0.190519 | 0.008091 | 0 |
| chr7 | 2850001 | 2950000 | 1003 | 1004 | 2900000  | 0.194525 | 0.00704  | 0 |
| chr7 | 4200001 | 4300000 | 1076 | 1008 | 4250000  | 0.290145 | 0.000129 | 0 |
| chr7 | 5300001 | 5400000 | 606  | 610  | 5350000  | 0.186472 | 0.009291 | 0 |
| chr7 | 5400001 | 5500000 | 1041 | 1009 | 5450000  | 0.241007 | 0.001187 | 0 |
| chr7 | 5450001 | 5550000 | 1026 | 1024 | 5500000  | 0.198778 | 0.006059 | 0 |
| chr7 | 5500001 | 5600000 | 985  | 979  | 5550000  | 0.204778 | 0.004881 | 0 |
| chr7 | 5550001 | 5650000 | 946  | 952  | 5600000  | 0.186842 | 0.009175 | 0 |
| chr7 | 5600001 | 5700000 | 1003 | 994  | 5650000  | 0.208967 | 0.004184 | 0 |
| chr7 | 5750001 | 5850000 | 730  | 724  | 5800000  | 0.20787  | 0.004357 | 0 |
| chr7 | 5800001 | 5900000 | 611  | 601  | 5850000  | 0.21977  | 0.002781 | 0 |
| chr7 | 5850001 | 5950000 | 415  | 410  | 5900000  | 0.21345  | 0.003539 | 0 |
| chr7 | 5900001 | 6000000 | 155  | 140  | 5950000  | 0.342804 | 8.26E-06 | 0 |
| chr7 | 5950001 | 6050000 | 194  | 134  | 6.00E+06 | 0.729787 | 3.06E-19 | 0 |
| chr7 | 6000001 | 6100000 | 596  | 548  | 6050000  | 0.317099 | 3.32E-05 | 0 |
| chr7 | 6050001 | 6150000 | 854  | 841  | 6100000  | 0.218093 | 0.002966 | 0 |
| chr7 | 6100001 | 6200000 | 907  | 887  | 6150000  | 0.228131 | 0.002004 | 0 |
| chr7 | 6400001 | 6500000 | 887  | 870  | 6450000  | 0.223882 | 0.00237  | 0 |
| chr7 | 6450001 | 6550000 | 969  | 950  | 6500000  | 0.224532 | 0.00231  | 0 |
| chr7 | 6900001 | 7000000 | 131  | 175  | 6950000  | -0.22183 | 0.002806 | 0 |
| chr7 | 8650001 | 8750000 | 640  | 851  | 8700000  | -0.21512 | 0.003604 | 0 |
| chr7 | 8700001 | 8800000 | 576  | 771  | 8750000  | -0.2247  | 0.002516 | 0 |
| chr7 | 8750001 | 8850000 | 552  | 759  | 8800000  | -0.26347 | 0.000519 | 0 |
| chr7 | 8800001 | 8900000 | 621  | 837  | 8850000  | -0.23467 | 0.001709 | 0 |
| chr7 | 9500001 | 9600000 | 571  | 761  | 9550000  | -0.21844 | 0.003186 | 0 |
| chr7 | 9550001 | 9650000 | 569  | 759  | 9600000  | -0.21971 | 0.003039 | 0 |

|      |          |          |      |      |          |          |          |   |
|------|----------|----------|------|------|----------|----------|----------|---|
| chr7 | 9950001  | 10050000 | 586  | 770  | 1.00E+07 | -0.19799 | 0.006646 | 0 |
| chr7 | 10000001 | 10100000 | 556  | 745  | 10050000 | -0.22619 | 0.002377 | 0 |
| chr7 | 10350001 | 10450000 | 560  | 743  | 10400000 | -0.21197 | 0.004045 | 0 |
| chr7 | 11900001 | 12000000 | 624  | 843  | 11950000 | -0.23802 | 0.001496 | 0 |
| chr7 | 13300001 | 13400000 | 623  | 818  | 13350000 | -0.19691 | 0.006901 | 0 |
| chr7 | 13700001 | 13800000 | 599  | 807  | 13750000 | -0.23405 | 0.001751 | 0 |
| chr7 | 13750001 | 13850000 | 590  | 789  | 13800000 | -0.22335 | 0.002649 | 0 |
| chr7 | 14100001 | 14200000 | 636  | 841  | 14150000 | -0.20712 | 0.004821 | 0 |
| chr7 | 14400001 | 14500000 | 618  | 821  | 14450000 | -0.21381 | 0.003782 | 0 |
| chr7 | 14450001 | 14550000 | 599  | 802  | 14500000 | -0.22508 | 0.00248  | 0 |
| chr7 | 15500001 | 15600000 | 569  | 748  | 15550000 | -0.19865 | 0.006498 | 0 |
| chr7 | 16250001 | 16350000 | 593  | 778  | 16300000 | -0.19578 | 0.007174 | 0 |
| chr7 | 16350001 | 16450000 | 699  | 911  | 16400000 | -0.1862  | 0.009904 | 0 |
| chr7 | 19450001 | 19550000 | 627  | 821  | 19500000 | -0.19295 | 0.007899 | 0 |
| chr7 | 19850001 | 19950000 | 488  | 676  | 19900000 | -0.27418 | 0.000324 | 0 |
| chr7 | 20100001 | 20200000 | 604  | 816  | 20150000 | -0.23806 | 0.001494 | 0 |
| chr7 | 20300001 | 20400000 | 859  | 860  | 20350000 | 0.194285 | 0.0071   | 0 |
| chr7 | 21350001 | 21450000 | 606  | 795  | 21400000 | -0.19567 | 0.007199 | 0 |
| chr7 | 25100001 | 25200000 | 885  | 880  | 25150000 | 0.204137 | 0.004996 | 0 |
| chr7 | 27150001 | 27250000 | 1203 | 1151 | 27200000 | 0.259712 | 0.000532 | 0 |
| chr7 | 28000001 | 28100000 | 923  | 911  | 28050000 | 0.214843 | 0.003357 | 0 |
| chr7 | 28500001 | 28600000 | 750  | 979  | 28550000 | -0.18846 | 0.009188 | 0 |
| chr7 | 31800001 | 31900000 | 698  | 913  | 31850000 | -0.19142 | 0.008318 | 0 |
| chr7 | 32450001 | 32550000 | 816  | 791  | 32500000 | 0.240854 | 0.001194 | 0 |
| chr7 | 32500001 | 32600000 | 788  | 778  | 32550000 | 0.214389 | 0.003416 | 0 |
| chr7 | 32900001 | 33000000 | 923  | 918  | 32950000 | 0.2038   | 0.005058 | 0 |
| chr7 | 33550001 | 33650000 | 644  | 895  | 33600000 | -0.27886 | 0.000263 | 0 |
| chr7 | 33600001 | 33700000 | 718  | 962  | 33650000 | -0.22609 | 0.002386 | 0 |
| chr7 | 37100001 | 37200000 | 605  | 797  | 37150000 | -0.20168 | 0.005845 | 0 |
| chr7 | 37800001 | 37900000 | 574  | 795  | 37850000 | -0.27394 | 0.000328 | 0 |
| chr7 | 37950001 | 38050000 | 620  | 814  | 3.80E+07 | -0.1968  | 0.006926 | 0 |
| chr7 | 41450001 | 41550000 | 781  | 1028 | 41500000 | -0.20048 | 0.006095 | 0 |
| chr7 | 41500001 | 41600000 | 730  | 999  | 41550000 | -0.25663 | 0.000696 | 0 |
| chr7 | 43600001 | 43700000 | 970  | 973  | 43650000 | 0.191508 | 0.00782  | 0 |
| chr7 | 44000001 | 44100000 | 286  | 267  | 44050000 | 0.295138 | 0.000101 | 0 |
| chr7 | 44050001 | 44150000 | 858  | 796  | 44100000 | 0.304172 | 6.46E-05 | 0 |
| chr7 | 44100001 | 44200000 | 1190 | 1137 | 44150000 | 0.261692 | 0.000487 | 0 |
| chr7 | 44700001 | 44800000 | 971  | 960  | 44750000 | 0.2124   | 0.003681 | 0 |
| chr7 | 44750001 | 44850000 | 1023 | 918  | 44800000 | 0.352203 | 4.85E-06 | 0 |
| chr7 | 44800001 | 44900000 | 949  | 908  | 44850000 | 0.259679 | 0.000532 | 0 |
| chr7 | 44950001 | 45050000 | 1008 | 1008 | 4.50E+07 | 0.195963 | 0.006694 | 0 |
| chr7 | 48500001 | 48600000 | 641  | 840  | 48550000 | -0.1941  | 0.007596 | 0 |
| chr7 | 48650001 | 48750000 | 637  | 833  | 48700000 | -0.19106 | 0.008421 | 0 |
| chr7 | 48900001 | 49000000 | 455  | 635  | 48950000 | -0.28493 | 0.000199 | 0 |
| chr7 | 48950001 | 49050000 | 508  | 672  | 4.90E+07 | -0.20767 | 0.004726 | 0 |
| chr7 | 49350001 | 49450000 | 637  | 851  | 49400000 | -0.2219  | 0.002798 | 0 |
| chr7 | 49650001 | 49750000 | 567  | 743  | 49700000 | -0.19405 | 0.00761  | 0 |

|      |          |          |     |     |          |          |          |   |
|------|----------|----------|-----|-----|----------|----------|----------|---|
| chr7 | 51900001 | 52000000 | 515 | 699 | 51950000 | -0.24476 | 0.00114  | 0 |
| chr7 | 52200001 | 52300000 | 601 | 787 | 52250000 | -0.19304 | 0.007877 | 0 |
| chr7 | 52400001 | 52500000 | 560 | 753 | 52450000 | -0.23126 | 0.001954 | 0 |
| chr7 | 53100001 | 53200000 | 590 | 773 | 53150000 | -0.19379 | 0.007677 | 0 |
| chr7 | 53150001 | 53250000 | 382 | 516 | 53200000 | -0.23784 | 0.001507 | 0 |
| chr7 | 53550001 | 53650000 | 580 | 760 | 53600000 | -0.19398 | 0.007627 | 0 |
| chr7 | 54350001 | 54450000 | 540 | 704 | 54400000 | -0.18665 | 0.009755 | 0 |
| chr7 | 56550001 | 56650000 | 636 | 841 | 56600000 | -0.20712 | 0.004821 | 0 |
| chr7 | 56900001 | 57000000 | 15  | 22  | 56950000 | -0.35658 | 5.30E-06 | 0 |
| chr7 | 56950001 | 57050000 | 15  | 10  | 5.70E+07 | 0.780926 | 1.60E-21 | 0 |
| chr7 | 57000001 | 57100000 | 14  | 6   | 57050000 | 1.418355 | 2.22E-54 | 0 |
| chr7 | 57050001 | 57150000 | 8   | 4   | 57100000 | 1.195963 | 1.84E-42 | 0 |
| chr7 | 57150001 | 57250000 | 190 | 191 | 57200000 | 0.18839  | 0.008704 | 0 |
| chr7 | 57800001 | 57900000 | 95  | 129 | 57850000 | -0.24541 | 0.00111  | 0 |
| chr7 | 57850001 | 57950000 | 109 | 161 | 57900000 | -0.36677 | 3.00E-06 | 0 |
| chr7 | 58050001 | 58150000 | 16  | 28  | 58100000 | -0.61139 | 1.08E-13 | 0 |
| chr7 | 61100001 | 61200000 | 9   | 9   | 61150000 | 0.195963 | 0.006694 | 0 |
| chr7 | 61150001 | 61250000 | 15  | 11  | 61200000 | 0.643422 | 1.28E-15 | 0 |
| chr7 | 61200001 | 61300000 | 15  | 12  | 61250000 | 0.517891 | 6.05E-11 | 0 |
| chr7 | 61250001 | 61350000 | 4   | 2   | 61300000 | 1.195963 | 1.84E-42 | 0 |
| chr7 | 61300001 | 61400000 | 1   | 1   | 61350000 | 0.195963 | 0.006694 | 0 |
| chr7 | 61350001 | 61450000 | 2   | 3   | 61400000 | -0.389   | 8.31E-07 | 0 |
| chr7 | 61400001 | 61500000 | 1   | 3   | 61450000 | -1.389   | 6.26E-48 | 0 |
| chr7 | 62300001 | 62400000 | 422 | 563 | 62350000 | -0.21993 | 0.003014 | 0 |
| chr7 | 62350001 | 62450000 | 406 | 540 | 62400000 | -0.21552 | 0.003552 | 0 |
| chr7 | 62600001 | 62700000 | 289 | 414 | 62650000 | -0.3226  | 3.21E-05 | 0 |
| chr7 | 62650001 | 62750000 | 163 | 247 | 62700000 | -0.40368 | 3.45E-07 | 0 |
| chr7 | 62750001 | 62850000 | 96  | 138 | 62800000 | -0.3276  | 2.48E-05 | 0 |
| chr7 | 62800001 | 62900000 | 93  | 135 | 62850000 | -0.34169 | 1.19E-05 | 0 |
| chr7 | 62850001 | 62950000 | 17  | 27  | 62900000 | -0.47146 | 4.30E-09 | 0 |
| chr7 | 62900001 | 63000000 | 27  | 59  | 62950000 | -0.93179 | 9.72E-27 | 0 |
| chr7 | 62950001 | 63050000 | 21  | 46  | 6.30E+07 | -0.93528 | 6.80E-27 | 0 |
| chr7 | 63050001 | 63150000 | 8   | 14  | 63100000 | -0.61139 | 1.08E-13 | 0 |
| chr7 | 63700001 | 63800000 | 448 | 589 | 63750000 | -0.19881 | 0.006462 | 0 |
| chr7 | 63850001 | 63950000 | 463 | 622 | 63900000 | -0.22994 | 0.002057 | 0 |
| chr7 | 63900001 | 64000000 | 530 | 708 | 63950000 | -0.22179 | 0.00281  | 0 |
| chr7 | 64400001 | 64500000 | 586 | 586 | 64450000 | 0.195963 | 0.006694 | 0 |
| chr7 | 64450001 | 64550000 | 320 | 297 | 64500000 | 0.303572 | 6.66E-05 | 0 |
| chr7 | 64550001 | 64650000 | 49  | 64  | 64600000 | -0.18933 | 0.008925 | 0 |
| chr7 | 64950001 | 65050000 | 91  | 90  | 6.50E+07 | 0.211905 | 0.00375  | 0 |
| chr7 | 65950001 | 66050000 | 652 | 587 | 6.60E+07 | 0.347474 | 6.35E-06 | 0 |
| chr7 | 66000001 | 66100000 | 715 | 646 | 66050000 | 0.342372 | 8.46E-06 | 0 |
| chr7 | 66050001 | 66150000 | 740 | 694 | 66100000 | 0.288553 | 0.00014  | 0 |
| chr7 | 66750001 | 66850000 | 444 | 445 | 66800000 | 0.192717 | 0.007499 | 0 |
| chr7 | 69700001 | 69800000 | 684 | 893 | 69750000 | -0.1887  | 0.009114 | 0 |
| chr7 | 71100001 | 71200000 | 762 | 761 | 71150000 | 0.197858 | 0.00626  | 0 |
| chr7 | 71150001 | 71250000 | 766 | 762 | 71200000 | 0.203516 | 0.00511  | 0 |

|      |          |          |      |      |          |          |          |   |
|------|----------|----------|------|------|----------|----------|----------|---|
| chr7 | 71650001 | 71750000 | 773  | 770  | 71700000 | 0.201573 | 0.005482 | 0 |
| chr7 | 71950001 | 72050000 | 361  | 475  | 7.20E+07 | -0.19997 | 0.006206 | 0 |
| chr7 | 72000001 | 72100000 | 179  | 240  | 72050000 | -0.22711 | 0.002294 | 0 |
| chr7 | 72400001 | 72500000 | 39   | 30   | 72450000 | 0.574475 | 5.87E-13 | 0 |
| chr7 | 72450001 | 72550000 | 4    | 8    | 72500000 | -0.80404 | 3.29E-21 | 0 |
| chr7 | 72500001 | 72600000 | 2    | 2    | 72550000 | 0.195963 | 0.006694 | 0 |
| chr7 | 72550001 | 72650000 | 4    | 2    | 72600000 | 1.195963 | 1.84E-42 | 0 |
| chr7 | 72600001 | 72700000 | 29   | 25   | 72650000 | 0.410088 | 1.41E-07 | 0 |
| chr7 | 72650001 | 72750000 | 259  | 242  | 72700000 | 0.293908 | 0.000108 | 0 |
| chr7 | 72900001 | 73000000 | 931  | 929  | 72950000 | 0.199066 | 0.005997 | 0 |
| chr7 | 72950001 | 73050000 | 1043 | 993  | 7.30E+07 | 0.266837 | 0.000386 | 0 |
| chr7 | 73150001 | 73250000 | 840  | 834  | 73200000 | 0.206305 | 0.004616 | 0 |
| chr7 | 73200001 | 73300000 | 961  | 883  | 73250000 | 0.318086 | 3.15E-05 | 0 |
| chr7 | 73550001 | 73650000 | 865  | 862  | 73600000 | 0.200975 | 0.005601 | 0 |
| chr7 | 73600001 | 73700000 | 918  | 861  | 73650000 | 0.288444 | 0.000141 | 0 |
| chr7 | 73650001 | 73750000 | 934  | 928  | 73700000 | 0.205261 | 0.004795 | 0 |
| chr7 | 73800001 | 73900000 | 915  | 890  | 73850000 | 0.235929 | 0.001463 | 0 |
| chr7 | 73850001 | 73950000 | 1020 | 1004 | 73900000 | 0.218773 | 0.00289  | 0 |
| chr7 | 74150001 | 74250000 | 16   | 24   | 74200000 | -0.389   | 8.31E-07 | 0 |
| chr7 | 74300001 | 74400000 | 52   | 52   | 74350000 | 0.195963 | 0.006694 | 0 |
| chr7 | 74350001 | 74450000 | 22   | 20   | 74400000 | 0.333467 | 1.38E-05 | 0 |
| chr7 | 74400001 | 74500000 | 83   | 72   | 74450000 | 0.401077 | 2.52E-07 | 0 |
| chr7 | 74450001 | 74550000 | 91   | 78   | 74500000 | 0.418355 | 8.19E-08 | 0 |
| chr7 | 74500001 | 74600000 | 10   | 10   | 74550000 | 0.195963 | 0.006694 | 0 |
| chr7 | 74950001 | 75050000 | 13   | 12   | 7.50E+07 | 0.31144  | 4.46E-05 | 0 |
| chr7 | 75000001 | 75100000 | 107  | 104  | 75050000 | 0.23699  | 0.001401 | 0 |
| chr7 | 75050001 | 75150000 | 126  | 125  | 75100000 | 0.207459 | 0.004424 | 0 |
| chr7 | 75900001 | 76000000 | 994  | 987  | 75950000 | 0.206159 | 0.00464  | 0 |
| chr7 | 75950001 | 76050000 | 962  | 919  | 7.60E+07 | 0.261935 | 0.000482 | 0 |
| chr7 | 76000001 | 76100000 | 626  | 582  | 76050000 | 0.301107 | 7.53E-05 | 0 |
| chr7 | 76050001 | 76150000 | 258  | 231  | 76100000 | 0.355441 | 4.03E-06 | 0 |
| chr7 | 76100001 | 76200000 | 124  | 112  | 76150000 | 0.342804 | 8.26E-06 | 0 |
| chr7 | 76200001 | 76300000 | 85   | 69   | 76250000 | 0.49683  | 3.08E-10 | 0 |
| chr7 | 76250001 | 76350000 | 75   | 70   | 76300000 | 0.295499 | 9.96E-05 | 0 |
| chr7 | 76400001 | 76500000 | 71   | 118  | 76450000 | -0.53693 | 3.86E-11 | 0 |
| chr7 | 76450001 | 76550000 | 63   | 114  | 76500000 | -0.65965 | 1.85E-15 | 0 |
| chr7 | 76500001 | 76600000 | 59   | 87   | 76550000 | -0.36434 | 3.44E-06 | 0 |
| chr7 | 76550001 | 76650000 | 106  | 106  | 76600000 | 0.195963 | 0.006694 | 0 |
| chr7 | 76600001 | 76700000 | 90   | 88   | 76650000 | 0.228385 | 0.001984 | 0 |
| chr7 | 78200001 | 78300000 | 601  | 809  | 78250000 | -0.23281 | 0.001839 | 0 |
| chr7 | 81300001 | 81400000 | 648  | 873  | 81350000 | -0.23402 | 0.001753 | 0 |
| chr7 | 81350001 | 81450000 | 629  | 860  | 81400000 | -0.25531 | 0.000736 | 0 |
| chr7 | 81400001 | 81500000 | 603  | 800  | 81450000 | -0.21188 | 0.004059 | 0 |
| chr7 | 81450001 | 81550000 | 561  | 764  | 81500000 | -0.24961 | 0.000934 | 0 |
| chr7 | 81500001 | 81600000 | 585  | 774  | 81550000 | -0.20793 | 0.004682 | 0 |
| chr7 | 82550001 | 82650000 | 641  | 841  | 82600000 | -0.19582 | 0.007163 | 0 |
| chr7 | 83050001 | 83150000 | 526  | 694  | 83100000 | -0.20391 | 0.005404 | 0 |

|      |          |          |      |      |          |          |          |   |
|------|----------|----------|------|------|----------|----------|----------|---|
| chr7 | 83450001 | 83550000 | 629  | 828  | 83500000 | -0.20061 | 0.006069 | 0 |
| chr7 | 83650001 | 83750000 | 592  | 784  | 83700000 | -0.20929 | 0.004458 | 0 |
| chr7 | 83700001 | 83800000 | 632  | 843  | 83750000 | -0.21965 | 0.003046 | 0 |
| chr7 | 85650001 | 85750000 | 586  | 810  | 85700000 | -0.27106 | 0.000373 | 0 |
| chr7 | 85800001 | 85900000 | 524  | 704  | 85850000 | -0.23005 | 0.002048 | 0 |
| chr7 | 85850001 | 85950000 | 580  | 766  | 85900000 | -0.20533 | 0.005139 | 0 |
| chr7 | 86250001 | 86350000 | 685  | 932  | 86300000 | -0.24826 | 0.000987 | 0 |
| chr7 | 87600001 | 87700000 | 692  | 907  | 87650000 | -0.19437 | 0.007528 | 0 |
| chr7 | 87650001 | 87750000 | 662  | 968  | 87700000 | -0.35221 | 6.73E-06 | 0 |
| chr7 | 87700001 | 87800000 | 735  | 989  | 87750000 | -0.23226 | 0.001879 | 0 |
| chr7 | 89100001 | 89200000 | 581  | 769  | 89150000 | -0.20848 | 0.00459  | 0 |
| chr7 | 90300001 | 90400000 | 635  | 861  | 90350000 | -0.24329 | 0.00121  | 0 |
| chr7 | 90500001 | 90600000 | 643  | 846  | 90550000 | -0.19988 | 0.006226 | 0 |
| chr7 | 90550001 | 90650000 | 638  | 861  | 90600000 | -0.23649 | 0.00159  | 0 |
| chr7 | 90700001 | 90800000 | 679  | 888  | 90750000 | -0.19119 | 0.008385 | 0 |
| chr7 | 90750001 | 90850000 | 619  | 808  | 90800000 | -0.18845 | 0.009189 | 0 |
| chr7 | 91250001 | 91350000 | 657  | 867  | 91300000 | -0.20418 | 0.005353 | 0 |
| chr7 | 91300001 | 91400000 | 595  | 776  | 91350000 | -0.1872  | 0.009579 | 0 |
| chr7 | 91400001 | 91500000 | 659  | 887  | 91450000 | -0.23269 | 0.001847 | 0 |
| chr7 | 94400001 | 94500000 | 585  | 774  | 94450000 | -0.20793 | 0.004682 | 0 |
| chr7 | 97150001 | 97250000 | 540  | 754  | 97200000 | -0.28564 | 0.000193 | 0 |
| chr7 | 97500001 | 97600000 | 157  | 151  | 97550000 | 0.252179 | 0.000739 | 0 |
| chr7 | 97550001 | 97650000 | 302  | 283  | 97600000 | 0.28971  | 0.000132 | 0 |
| chr7 | 97600001 | 97700000 | 573  | 539  | 97650000 | 0.284213 | 0.000172 | 0 |
| chr7 | 99000001 | 99100000 | 986  | 930  | 99050000 | 0.28032  | 0.000207 | 0 |
| chr7 | 99050001 | 99150000 | 892  | 886  | 99100000 | 0.2057   | 0.004719 | 0 |
| chr7 | 99600001 | 99700000 | 1005 | 997  | 99650000 | 0.207493 | 0.004418 | 0 |
| chr7 | 99650001 | 99750000 | 1014 | 964  | 99700000 | 0.268916 | 0.000352 | 0 |
| chr7 | 99700001 | 99800000 | 903  | 899  | 99750000 | 0.202368 | 0.005327 | 0 |
| chr7 | 99750001 | 99850000 | 742  | 737  | 99800000 | 0.205718 | 0.004716 | 0 |
| chr7 | 1E+08    | 1E+08    | 967  | 952  | 1E+08    | 0.218517 | 0.002918 | 0 |
| chr7 | 1E+08    | 1E+08    | 1005 | 999  | 1E+08    | 0.204602 | 0.004912 | 0 |
| chr7 | 1E+08    | 1E+08    | 905  | 815  | 1E+08    | 0.347081 | 6.49E-06 | 0 |
| chr7 | 1E+08    | 1.01E+08 | 1035 | 879  | 1E+08    | 0.431659 | 3.36E-08 | 0 |
| chr7 | 1E+08    | 1.01E+08 | 946  | 897  | 1.01E+08 | 0.272695 | 0.000296 | 0 |
| chr7 | 1.01E+08 | 1.01E+08 | 920  | 914  | 1.01E+08 | 0.205403 | 0.004771 | 0 |
| chr7 | 1.01E+08 | 1.01E+08 | 1015 | 923  | 1.01E+08 | 0.33304  | 1.42E-05 | 0 |
| chr7 | 1.01E+08 | 1.01E+08 | 1084 | 993  | 1.01E+08 | 0.322462 | 2.50E-05 | 0 |
| chr7 | 1.01E+08 | 1.01E+08 | 732  | 733  | 1.01E+08 | 0.193993 | 0.007173 | 0 |
| chr7 | 1.02E+08 | 1.02E+08 | 1050 | 1019 | 1.02E+08 | 0.239198 | 0.001279 | 0 |
| chr7 | 1.02E+08 | 1.02E+08 | 946  | 938  | 1.02E+08 | 0.208215 | 0.004302 | 0 |
| chr7 | 1.02E+08 | 1.02E+08 | 767  | 771  | 1.02E+08 | 0.188459 | 0.008684 | 0 |
| chr7 | 1.02E+08 | 1.02E+08 | 787  | 780  | 1.02E+08 | 0.208853 | 0.004202 | 0 |
| chr7 | 1.02E+08 | 1.02E+08 | 715  | 663  | 1.02E+08 | 0.304897 | 6.22E-05 | 0 |
| chr7 | 1.02E+08 | 1.02E+08 | 229  | 174  | 1.02E+08 | 0.592223 | 1.27E-13 | 0 |
| chr7 | 1.02E+08 | 1.02E+08 | 40   | 34   | 1.02E+08 | 0.430428 | 3.65E-08 | 0 |
| chr7 | 1.02E+08 | 1.02E+08 | 31   | 29   | 1.02E+08 | 0.292178 | 0.000117 | 0 |

|      |          |          |      |      |          |          |          |   |
|------|----------|----------|------|------|----------|----------|----------|---|
| chr7 | 1.03E+08 | 1.03E+08 | 267  | 257  | 1.03E+08 | 0.251034 | 0.000776 | 0 |
| chr7 | 1.03E+08 | 1.03E+08 | 659  | 660  | 1.03E+08 | 0.193775 | 0.007227 | 0 |
| chr7 | 1.08E+08 | 1.08E+08 | 649  | 856  | 1.08E+08 | -0.20343 | 0.005496 | 0 |
| chr7 | 1.09E+08 | 1.09E+08 | 589  | 805  | 1.09E+08 | -0.25476 | 0.000753 | 0 |
| chr7 | 1.09E+08 | 1.09E+08 | 578  | 787  | 1.09E+08 | -0.24933 | 0.000945 | 0 |
| chr7 | 1.09E+08 | 1.09E+08 | 608  | 808  | 1.09E+08 | -0.21432 | 0.003712 | 0 |
| chr7 | 1.09E+08 | 1.09E+08 | 581  | 760  | 1.09E+08 | -0.1915  | 0.008297 | 0 |
| chr7 | 1.09E+08 | 1.09E+08 | 563  | 749  | 1.09E+08 | -0.21587 | 0.003506 | 0 |
| chr7 | 1.1E+08  | 1.1E+08  | 522  | 697  | 1.1E+08  | -0.22115 | 0.002879 | 0 |
| chr7 | 1.1E+08  | 1.1E+08  | 584  | 813  | 1.1E+08  | -0.28132 | 0.000235 | 0 |
| chr7 | 1.1E+08  | 1.1E+08  | 601  | 813  | 1.1E+08  | -0.23993 | 0.001386 | 0 |
| chr7 | 1.1E+08  | 1.1E+08  | 565  | 779  | 1.1E+08  | -0.26741 | 0.000437 | 0 |
| chr7 | 1.11E+08 | 1.11E+08 | 734  | 978  | 1.11E+08 | -0.21809 | 0.003228 | 0 |
| chr7 | 1.13E+08 | 1.13E+08 | 640  | 857  | 1.13E+08 | -0.22526 | 0.002463 | 0 |
| chr7 | 1.13E+08 | 1.13E+08 | 624  | 863  | 1.13E+08 | -0.27185 | 0.00036  | 0 |
| chr7 | 1.14E+08 | 1.14E+08 | 619  | 860  | 1.14E+08 | -0.27843 | 0.000268 | 0 |
| chr7 | 1.14E+08 | 1.14E+08 | 665  | 915  | 1.14E+08 | -0.26445 | 0.000498 | 0 |
| chr7 | 1.15E+08 | 1.15E+08 | 649  | 872  | 1.15E+08 | -0.23015 | 0.00204  | 0 |
| chr7 | 1.18E+08 | 1.18E+08 | 596  | 778  | 1.18E+08 | -0.18849 | 0.009176 | 0 |
| chr7 | 1.18E+08 | 1.18E+08 | 594  | 776  | 1.18E+08 | -0.18963 | 0.008835 | 0 |
| chr7 | 1.18E+08 | 1.18E+08 | 611  | 812  | 1.18E+08 | -0.21434 | 0.003709 | 0 |
| chr7 | 1.19E+08 | 1.19E+08 | 527  | 710  | 1.19E+08 | -0.23405 | 0.001751 | 0 |
| chr7 | 1.2E+08  | 1.2E+08  | 546  | 733  | 1.2E+08  | -0.22895 | 0.002137 | 0 |
| chr7 | 1.2E+08  | 1.2E+08  | 576  | 778  | 1.2E+08  | -0.23774 | 0.001513 | 0 |
| chr7 | 1.2E+08  | 1.2E+08  | 559  | 754  | 1.2E+08  | -0.23575 | 0.001637 | 0 |
| chr7 | 1.2E+08  | 1.2E+08  | 612  | 808  | 1.2E+08  | -0.20486 | 0.005225 | 0 |
| chr7 | 1.2E+08  | 1.2E+08  | 675  | 882  | 1.2E+08  | -0.18993 | 0.008747 | 0 |
| chr7 | 1.22E+08 | 1.22E+08 | 627  | 820  | 1.22E+08 | -0.1912  | 0.008382 | 0 |
| chr7 | 1.22E+08 | 1.22E+08 | 638  | 832  | 1.22E+08 | -0.18706 | 0.009623 | 0 |
| chr7 | 1.22E+08 | 1.22E+08 | 504  | 690  | 1.22E+08 | -0.25721 | 0.000679 | 0 |
| chr7 | 1.22E+08 | 1.23E+08 | 562  | 753  | 1.23E+08 | -0.22612 | 0.002384 | 0 |
| chr7 | 1.23E+08 | 1.23E+08 | 622  | 825  | 1.23E+08 | -0.21152 | 0.004113 | 0 |
| chr7 | 1.24E+08 | 1.24E+08 | 663  | 866  | 1.24E+08 | -0.1894  | 0.008905 | 0 |
| chr7 | 1.25E+08 | 1.25E+08 | 605  | 808  | 1.25E+08 | -0.22146 | 0.002846 | 0 |
| chr7 | 1.25E+08 | 1.25E+08 | 598  | 814  | 1.25E+08 | -0.24892 | 0.000961 | 0 |
| chr7 | 1.25E+08 | 1.25E+08 | 630  | 830  | 1.25E+08 | -0.2018  | 0.005821 | 0 |
| chr7 | 1.26E+08 | 1.26E+08 | 607  | 793  | 1.26E+08 | -0.18966 | 0.008826 | 0 |
| chr7 | 1.26E+08 | 1.26E+08 | 597  | 782  | 1.26E+08 | -0.19347 | 0.00776  | 0 |
| chr7 | 1.27E+08 | 1.27E+08 | 670  | 895  | 1.27E+08 | -0.22176 | 0.002813 | 0 |
| chr7 | 1.28E+08 | 1.28E+08 | 965  | 968  | 1.28E+08 | 0.191485 | 0.007826 | 0 |
| chr7 | 1.28E+08 | 1.28E+08 | 1121 | 1026 | 1.28E+08 | 0.323719 | 2.34E-05 | 0 |
| chr7 | 1.28E+08 | 1.28E+08 | 1052 | 1057 | 1.28E+08 | 0.189122 | 0.008489 | 0 |
| chr7 | 1.29E+08 | 1.29E+08 | 1144 | 1103 | 1.29E+08 | 0.248617 | 0.000861 | 0 |
| chr7 | 1.29E+08 | 1.29E+08 | 906  | 909  | 1.29E+08 | 0.191194 | 0.007905 | 0 |
| chr7 | 1.29E+08 | 1.3E+08  | 1105 | 1076 | 1.29E+08 | 0.234331 | 0.001562 | 0 |
| chr7 | 1.3E+08  | 1.3E+08  | 38   | 51   | 1.3E+08  | -0.22853 | 0.002172 | 0 |
| chr7 | 1.3E+08  | 1.3E+08  | 302  | 286  | 1.3E+08  | 0.274496 | 0.000272 | 0 |

|      |          |          |      |      |          |          |          |   |
|------|----------|----------|------|------|----------|----------|----------|---|
| chr7 | 1.31E+08 | 1.31E+08 | 1007 | 994  | 1.31E+08 | 0.214709 | 0.003374 | 0 |
| chr7 | 1.31E+08 | 1.31E+08 | 1104 | 1046 | 1.31E+08 | 0.27382  | 0.000281 | 0 |
| chr7 | 1.32E+08 | 1.32E+08 | 833  | 1087 | 1.32E+08 | -0.188   | 0.009329 | 0 |
| chr7 | 1.32E+08 | 1.32E+08 | 797  | 1049 | 1.32E+08 | -0.2004  | 0.006113 | 0 |
| chr7 | 1.34E+08 | 1.34E+08 | 775  | 1012 | 1.34E+08 | -0.18898 | 0.00903  | 0 |
| chr7 | 1.37E+08 | 1.37E+08 | 597  | 799  | 1.37E+08 | -0.2245  | 0.002535 | 0 |
| chr7 | 1.37E+08 | 1.38E+08 | 721  | 974  | 1.37E+08 | -0.23796 | 0.0015   | 0 |
| chr7 | 1.39E+08 | 1.39E+08 | 896  | 869  | 1.39E+08 | 0.240106 | 0.001232 | 0 |
| chr7 | 1.4E+08  | 1.4E+08  | 767  | 753  | 1.4E+08  | 0.22254  | 0.002498 | 0 |
| chr7 | 1.42E+08 | 1.42E+08 | 628  | 820  | 1.42E+08 | -0.1889  | 0.009054 | 0 |
| chr7 | 1.42E+08 | 1.42E+08 | 485  | 643  | 1.42E+08 | -0.21087 | 0.004211 | 0 |
| chr7 | 1.43E+08 | 1.43E+08 | 485  | 646  | 1.43E+08 | -0.21759 | 0.00329  | 0 |
| chr7 | 1.43E+08 | 1.43E+08 | 135  | 194  | 1.43E+08 | -0.32713 | 2.54E-05 | 0 |
| chr7 | 1.43E+08 | 1.43E+08 | 7    | 6    | 1.43E+08 | 0.418355 | 8.19E-08 | 0 |
| chr7 | 1.43E+08 | 1.43E+08 | 4    | 3    | 1.43E+08 | 0.611001 | 2.44E-14 | 0 |
| chr7 | 1.43E+08 | 1.43E+08 | 82   | 130  | 1.43E+08 | -0.46885 | 5.14E-09 | 0 |
| chr7 | 1.43E+08 | 1.44E+08 | 88   | 136  | 1.43E+08 | -0.43207 | 5.86E-08 | 0 |
| chr7 | 1.43E+08 | 1.44E+08 | 60   | 60   | 1.44E+08 | 0.195963 | 0.006694 | 0 |
| chr7 | 1.44E+08 | 1.44E+08 | 683  | 907  | 1.44E+08 | -0.21325 | 0.00386  | 0 |
| chr7 | 1.44E+08 | 1.44E+08 | 632  | 847  | 1.44E+08 | -0.22647 | 0.002351 | 0 |
| chr7 | 1.44E+08 | 1.44E+08 | 627  | 835  | 1.44E+08 | -0.21735 | 0.003319 | 0 |
| chr7 | 1.44E+08 | 1.44E+08 | 41   | 37   | 1.44E+08 | 0.344062 | 7.69E-06 | 0 |
| chr7 | 1.45E+08 | 1.45E+08 | 554  | 724  | 1.45E+08 | -0.19014 | 0.008685 | 0 |
| chr7 | 1.45E+08 | 1.46E+08 | 594  | 777  | 1.46E+08 | -0.19149 | 0.0083   | 0 |
| chr7 | 1.46E+08 | 1.46E+08 | 506  | 671  | 1.46E+08 | -0.21121 | 0.004159 | 0 |
| chr7 | 1.46E+08 | 1.46E+08 | 579  | 792  | 1.46E+08 | -0.25597 | 0.000716 | 0 |
| chr7 | 1.46E+08 | 1.46E+08 | 551  | 753  | 1.46E+08 | -0.25463 | 0.000757 | 0 |
| chr7 | 1.47E+08 | 1.47E+08 | 612  | 800  | 1.47E+08 | -0.19051 | 0.008579 | 0 |
| chr7 | 1.47E+08 | 1.47E+08 | 590  | 771  | 1.47E+08 | -0.19005 | 0.008711 | 0 |
| chr7 | 1.48E+08 | 1.48E+08 | 645  | 852  | 1.48E+08 | -0.20559 | 0.005091 | 0 |
| chr7 | 1.49E+08 | 1.49E+08 | 988  | 989  | 1.49E+08 | 0.194504 | 0.007046 | 0 |
| chr7 | 1.49E+08 | 1.5E+08  | 1195 | 1190 | 1.49E+08 | 0.202012 | 0.005396 | 0 |
| chr7 | 1.5E+08  | 1.5E+08  | 65   | 89   | 1.5E+08  | -0.2574  | 0.000673 | 0 |
| chr7 | 1.51E+08 | 1.51E+08 | 1259 | 1202 | 1.51E+08 | 0.262804 | 0.000463 | 0 |
| chr7 | 1.51E+08 | 1.51E+08 | 1297 | 1217 | 1.51E+08 | 0.287812 | 0.000145 | 0 |
| chr7 | 1.51E+08 | 1.51E+08 | 1287 | 1280 | 1.51E+08 | 0.203831 | 0.005052 | 0 |
| chr7 | 1.51E+08 | 1.51E+08 | 1285 | 1260 | 1.51E+08 | 0.224308 | 0.002331 | 0 |
| chr7 | 1.51E+08 | 1.51E+08 | 1224 | 1232 | 1.51E+08 | 0.186564 | 0.009262 | 0 |
| chr7 | 1.51E+08 | 1.51E+08 | 1143 | 1138 | 1.51E+08 | 0.202288 | 0.005342 | 0 |
| chr7 | 1.51E+08 | 1.51E+08 | 1133 | 1124 | 1.51E+08 | 0.207469 | 0.004422 | 0 |
| chr7 | 1.51E+08 | 1.51E+08 | 1185 | 1166 | 1.51E+08 | 0.219282 | 0.002834 | 0 |
| chr7 | 1.53E+08 | 1.53E+08 | 596  | 781  | 1.53E+08 | -0.19405 | 0.007611 | 0 |
| chr7 | 1.53E+08 | 1.54E+08 | 97   | 131  | 1.53E+08 | -0.23755 | 0.001525 | 0 |
| chr7 | 1.54E+08 | 1.54E+08 | 63   | 96   | 1.54E+08 | -0.41172 | 2.11E-07 | 0 |
| chr7 | 1.54E+08 | 1.54E+08 | 65   | 110  | 1.54E+08 | -0.56303 | 5.23E-12 | 0 |
| chr7 | 1.56E+08 | 1.56E+08 | 1074 | 1048 | 1.56E+08 | 0.231318 | 0.001764 | 0 |
| chr7 | 1.57E+08 | 1.57E+08 | 928  | 927  | 1.57E+08 | 0.197519 | 0.006336 | 0 |

|      |          |          |      |      |          |          |          |   |
|------|----------|----------|------|------|----------|----------|----------|---|
| chr7 | 1.58E+08 | 1.58E+08 | 1055 | 1013 | 1.58E+08 | 0.254572 | 0.000666 | 0 |
| chr7 | 1.58E+08 | 1.58E+08 | 988  | 975  | 1.58E+08 | 0.215072 | 0.003328 | 0 |
| chr7 | 1.58E+08 | 1.58E+08 | 994  | 981  | 1.58E+08 | 0.214956 | 0.003343 | 0 |
| chr7 | 1.59E+08 | 1.59E+08 | 201  | 191  | 1.59E+08 | 0.269586 | 0.000341 | 0 |
| chr7 | 1        | 100000   | 557  | 564  | 50000    | 0.177945 | 0.012338 | 0 |
| chr7 | 400001   | 500000   | 1097 | 1110 | 450000   | 0.178967 | 0.011932 | 0 |
| chr7 | 600001   | 700000   | 1040 | 1073 | 650000   | 0.150896 | 0.028361 | 0 |
| chr7 | 1100001  | 1200000  | 1017 | 1044 | 1150000  | 0.158161 | 0.022908 | 0 |
| chr7 | 1350001  | 1450000  | 1195 | 1222 | 1400000  | 0.163729 | 0.019353 | 0 |
| chr7 | 1600001  | 1700000  | 1103 | 1147 | 1650000  | 0.13953  | 0.039031 | 0 |
| chr7 | 1950001  | 2050000  | 1198 | 1226 | 2.00E+06 | 0.162632 | 0.020014 | 0 |
| chr7 | 2000001  | 2100000  | 1154 | 1189 | 2050000  | 0.152858 | 0.026792 | 0 |
| chr7 | 2150001  | 2250000  | 1138 | 1154 | 2200000  | 0.17582  | 0.01322  | 0 |
| chr7 | 2450001  | 2550000  | 1082 | 1113 | 2500000  | 0.15521  | 0.025006 | 0 |
| chr7 | 2500001  | 2600000  | 1130 | 1141 | 2550000  | 0.181987 | 0.010799 | 0 |
| chr7 | 2750001  | 2850000  | 1056 | 1095 | 2800000  | 0.143642 | 0.034845 | 0 |
| chr7 | 2800001  | 2900000  | 1026 | 1057 | 2850000  | 0.153018 | 0.026666 | 0 |
| chr7 | 3100001  | 3200000  | 803  | 1010 | 3150000  | -0.13492 | 0.045217 | 0 |
| chr7 | 4150001  | 4250000  | 1081 | 1090 | 4200000  | 0.184001 | 0.010097 | 0 |
| chr7 | 4250001  | 4350000  | 903  | 935  | 4300000  | 0.145723 | 0.032871 | 0 |
| chr7 | 4800001  | 4900000  | 1044 | 1086 | 4850000  | 0.139061 | 0.039535 | 0 |
| chr7 | 4850001  | 4950000  | 978  | 1021 | 4900000  | 0.133887 | 0.045437 | 0 |
| chr7 | 5050001  | 5150000  | 636  | 650  | 5100000  | 0.16455  | 0.018871 | 0 |
| chr7 | 5100001  | 5200000  | 714  | 737  | 5150000  | 0.150222 | 0.028917 | 0 |
| chr7 | 5250001  | 5350000  | 647  | 653  | 5300000  | 0.182646 | 0.010565 | 0 |
| chr7 | 5350001  | 5450000  | 860  | 872  | 5400000  | 0.175972 | 0.013156 | 0 |
| chr7 | 6250001  | 6350000  | 897  | 932  | 6300000  | 0.140741 | 0.037758 | 0 |
| chr7 | 6300001  | 6400000  | 761  | 770  | 6350000  | 0.179001 | 0.011919 | 0 |
| chr7 | 6350001  | 6450000  | 782  | 789  | 6400000  | 0.183106 | 0.010404 | 0 |
| chr7 | 6500001  | 6600000  | 990  | 1006 | 6550000  | 0.172833 | 0.014553 | 0 |
| chr7 | 6650001  | 6750000  | 1009 | 1034 | 6700000  | 0.160653 | 0.021254 | 0 |
| chr7 | 6700001  | 6800000  | 606  | 634  | 6750000  | 0.130798 | 0.049286 | 0 |
| chr7 | 6800001  | 6900000  | 76   | 78   | 6850000  | 0.158488 | 0.022685 | 0 |
| chr7 | 8500001  | 8600000  | 693  | 875  | 8550000  | -0.14046 | 0.039018 | 0 |
| chr7 | 8850001  | 8950000  | 605  | 780  | 8900000  | -0.17058 | 0.01632  | 0 |
| chr7 | 8900001  | 9000000  | 615  | 794  | 8950000  | -0.17259 | 0.015331 | 0 |
| chr7 | 9150001  | 9250000  | 581  | 730  | 9200000  | -0.1334  | 0.047055 | 0 |
| chr7 | 9200001  | 9300000  | 568  | 734  | 9250000  | -0.17393 | 0.014702 | 0 |
| chr7 | 9450001  | 9550000  | 507  | 648  | 9500000  | -0.15805 | 0.023801 | 0 |
| chr7 | 9800001  | 9900000  | 574  | 742  | 9850000  | -0.17441 | 0.014483 | 0 |
| chr7 | 9850001  | 9950000  | 583  | 733  | 9900000  | -0.13435 | 0.045893 | 0 |
| chr7 | 10050001 | 10150000 | 601  | 758  | 10100000 | -0.13887 | 0.040726 | 0 |
| chr7 | 10150001 | 10250000 | 578  | 746  | 10200000 | -0.17214 | 0.015545 | 0 |
| chr7 | 10300001 | 10400000 | 587  | 752  | 10350000 | -0.16141 | 0.021552 | 0 |
| chr7 | 10700001 | 10800000 | 545  | 702  | 10750000 | -0.16925 | 0.017001 | 0 |
| chr7 | 11300001 | 11400000 | 664  | 861  | 11350000 | -0.17887 | 0.01257  | 0 |
| chr7 | 11850001 | 11950000 | 666  | 853  | 11900000 | -0.16106 | 0.021777 | 0 |



|      |          |          |      |      |          |          |          |   |
|------|----------|----------|------|------|----------|----------|----------|---|
| chr7 | 12000001 | 12100000 | 668  | 842  | 12050000 | -0.13801 | 0.041672 | 0 |
| chr7 | 12050001 | 12150000 | 703  | 915  | 12100000 | -0.18428 | 0.010546 | 0 |
| chr7 | 12100001 | 12200000 | 708  | 914  | 12150000 | -0.17248 | 0.015382 | 0 |
| chr7 | 12700001 | 12800000 | 828  | 863  | 12750000 | 0.136233 | 0.042678 | 0 |
| chr7 | 13600001 | 13700000 | 603  | 760  | 13650000 | -0.13788 | 0.041817 | 0 |
| chr7 | 13650001 | 13750000 | 580  | 741  | 13700000 | -0.15746 | 0.024213 | 0 |
| chr7 | 13800001 | 13900000 | 597  | 763  | 13850000 | -0.15799 | 0.02384  | 0 |
| chr7 | 14000001 | 14100000 | 654  | 833  | 14050000 | -0.15306 | 0.027494 | 0 |
| chr7 | 14050001 | 14150000 | 613  | 783  | 14100000 | -0.15716 | 0.024423 | 0 |
| chr7 | 14150001 | 14250000 | 671  | 845  | 14200000 | -0.13668 | 0.043174 | 0 |
| chr7 | 14500001 | 14600000 | 632  | 794  | 14550000 | -0.13325 | 0.047232 | 0 |
| chr7 | 14900001 | 15000000 | 661  | 838  | 14950000 | -0.14634 | 0.03323  | 0 |
| chr7 | 15150001 | 15250000 | 641  | 831  | 15200000 | -0.17856 | 0.012694 | 0 |
| chr7 | 15400001 | 15500000 | 624  | 789  | 15450000 | -0.14252 | 0.036909 | 0 |
| chr7 | 15450001 | 15550000 | 653  | 826  | 15500000 | -0.1431  | 0.03633  | 0 |
| chr7 | 15600001 | 15700000 | 693  | 897  | 15650000 | -0.17629 | 0.013646 | 0 |
| chr7 | 15650001 | 15750000 | 683  | 880  | 15700000 | -0.16965 | 0.016791 | 0 |
| chr7 | 15750001 | 15850000 | 658  | 846  | 15800000 | -0.16661 | 0.018434 | 0 |
| chr7 | 15800001 | 15900000 | 639  | 814  | 15850000 | -0.15325 | 0.027347 | 0 |
| chr7 | 16300001 | 16400000 | 707  | 906  | 16350000 | -0.16184 | 0.021279 | 0 |
| chr7 | 16650001 | 16750000 | 870  | 895  | 16700000 | 0.155091 | 0.025094 | 0 |
| chr7 | 17750001 | 17850000 | 726  | 928  | 17800000 | -0.15819 | 0.023699 | 0 |
| chr7 | 17800001 | 17900000 | 754  | 966  | 17850000 | -0.1615  | 0.021497 | 0 |
| chr7 | 19800001 | 19900000 | 602  | 780  | 19850000 | -0.17775 | 0.013028 | 0 |
| chr7 | 20050001 | 20150000 | 593  | 748  | 20100000 | -0.13904 | 0.040537 | 0 |
| chr7 | 20150001 | 20250000 | 659  | 841  | 20200000 | -0.15586 | 0.025362 | 0 |
| chr7 | 20200001 | 20300000 | 704  | 895  | 20250000 | -0.15035 | 0.0297   | 0 |
| chr7 | 20350001 | 20450000 | 904  | 937  | 20400000 | 0.144237 | 0.034271 | 0 |
| chr7 | 20950001 | 21050000 | 619  | 790  | 2.10E+07 | -0.15595 | 0.025299 | 0 |
| chr7 | 21200001 | 21300000 | 594  | 756  | 21250000 | -0.15196 | 0.028373 | 0 |
| chr7 | 21250001 | 21350000 | 610  | 791  | 21300000 | -0.17891 | 0.012555 | 0 |
| chr7 | 21300001 | 21400000 | 591  | 769  | 21350000 | -0.18386 | 0.010693 | 0 |
| chr7 | 22800001 | 22900000 | 872  | 910  | 22850000 | 0.134425 | 0.044792 | 0 |
| chr7 | 23050001 | 23150000 | 911  | 930  | 23100000 | 0.166183 | 0.017943 | 0 |
| chr7 | 23300001 | 23400000 | 953  | 963  | 23350000 | 0.180903 | 0.011194 | 0 |
| chr7 | 23350001 | 23450000 | 955  | 991  | 23400000 | 0.142579 | 0.03589  | 0 |
| chr7 | 23500001 | 23600000 | 1171 | 1196 | 23550000 | 0.165487 | 0.018334 | 0 |
| chr7 | 24050001 | 24150000 | 752  | 944  | 24100000 | -0.13209 | 0.048675 | 0 |
| chr7 | 24100001 | 24200000 | 721  | 928  | 24150000 | -0.16816 | 0.017579 | 0 |
| chr7 | 24150001 | 24250000 | 805  | 1028 | 24200000 | -0.15682 | 0.02467  | 0 |
| chr7 | 24300001 | 24400000 | 712  | 910  | 24350000 | -0.15803 | 0.023814 | 0 |
| chr7 | 24350001 | 24450000 | 738  | 930  | 24400000 | -0.13765 | 0.042076 | 0 |
| chr7 | 24400001 | 24500000 | 758  | 957  | 24450000 | -0.14036 | 0.039131 | 0 |
| chr7 | 24700001 | 24800000 | 951  | 989  | 24750000 | 0.139438 | 0.03913  | 0 |
| chr7 | 24850001 | 24950000 | 1040 | 1056 | 24900000 | 0.173937 | 0.014048 | 0 |
| chr7 | 25050001 | 25150000 | 803  | 837  | 25100000 | 0.136135 | 0.04279  | 0 |
| chr7 | 25450001 | 25550000 | 781  | 988  | 25500000 | -0.14323 | 0.036202 | 0 |

|      |          |          |      |      |          |          |          |   |
|------|----------|----------|------|------|----------|----------|----------|---|
| chr7 | 25500001 | 25600000 | 843  | 1093 | 25550000 | -0.17873 | 0.012627 | 0 |
| chr7 | 25550001 | 25650000 | 773  | 1002 | 25600000 | -0.17838 | 0.012768 | 0 |
| chr7 | 26150001 | 26250000 | 836  | 855  | 26200000 | 0.163542 | 0.019465 | 0 |
| chr7 | 27200001 | 27300000 | 1123 | 1153 | 27250000 | 0.157928 | 0.023068 | 0 |
| chr7 | 28050001 | 28150000 | 1016 | 1030 | 28100000 | 0.176219 | 0.013051 | 0 |
| chr7 | 28250001 | 28350000 | 760  | 955  | 28300000 | -0.13354 | 0.046881 | 0 |
| chr7 | 28550001 | 28650000 | 751  | 949  | 28600000 | -0.14163 | 0.037806 | 0 |
| chr7 | 29150001 | 29250000 | 712  | 926  | 29200000 | -0.18317 | 0.010937 | 0 |
| chr7 | 29200001 | 29300000 | 694  | 872  | 29250000 | -0.13343 | 0.047014 | 0 |
| chr7 | 29500001 | 29600000 | 705  | 890  | 29550000 | -0.14022 | 0.039277 | 0 |
| chr7 | 30200001 | 30300000 | 901  | 1148 | 30250000 | -0.15356 | 0.027104 | 0 |
| chr7 | 30250001 | 30350000 | 785  | 1001 | 30300000 | -0.15471 | 0.02622  | 0 |
| chr7 | 30400001 | 30500000 | 789  | 1007 | 30450000 | -0.156   | 0.02526  | 0 |
| chr7 | 30500001 | 30600000 | 859  | 881  | 30550000 | 0.159479 | 0.02202  | 0 |
| chr7 | 30550001 | 30650000 | 838  | 869  | 30600000 | 0.143557 | 0.034927 | 0 |
| chr7 | 30600001 | 30700000 | 876  | 907  | 30650000 | 0.145791 | 0.032807 | 0 |
| chr7 | 31750001 | 31850000 | 709  | 891  | 31800000 | -0.13368 | 0.046712 | 0 |
| chr7 | 31850001 | 31950000 | 732  | 919  | 31900000 | -0.13226 | 0.048465 | 0 |
| chr7 | 32550001 | 32650000 | 761  | 772  | 32600000 | 0.175259 | 0.013463 | 0 |
| chr7 | 32850001 | 32950000 | 612  | 632  | 32900000 | 0.14957  | 0.029465 | 0 |
| chr7 | 33500001 | 33600000 | 675  | 877  | 33550000 | -0.18173 | 0.011463 | 0 |
| chr7 | 33650001 | 33750000 | 764  | 960  | 33700000 | -0.1335  | 0.046929 | 0 |
| chr7 | 34050001 | 34150000 | 799  | 1020 | 34100000 | -0.15634 | 0.025015 | 0 |
| chr7 | 34100001 | 34200000 | 792  | 996  | 34150000 | -0.13468 | 0.0455   | 0 |
| chr7 | 35300001 | 35400000 | 770  | 974  | 35350000 | -0.1431  | 0.036326 | 0 |
| chr7 | 35350001 | 35450000 | 772  | 973  | 35400000 | -0.13788 | 0.04182  | 0 |
| chr7 | 35750001 | 35850000 | 786  | 818  | 35800000 | 0.138392 | 0.040261 | 0 |
| chr7 | 36000001 | 36100000 | 794  | 831  | 36050000 | 0.130254 | 0.049991 | 0 |
| chr7 | 36400001 | 36500000 | 905  | 944  | 36450000 | 0.135094 | 0.044    | 0 |
| chr7 | 36550001 | 36650000 | 757  | 986  | 36600000 | -0.18533 | 0.01019  | 0 |
| chr7 | 36650001 | 36750000 | 790  | 993  | 36700000 | -0.13398 | 0.046346 | 0 |
| chr7 | 37300001 | 37400000 | 655  | 822  | 37350000 | -0.13168 | 0.049194 | 0 |
| chr7 | 37750001 | 37850000 | 615  | 785  | 37800000 | -0.15614 | 0.025158 | 0 |
| chr7 | 38000001 | 38100000 | 644  | 835  | 38050000 | -0.17875 | 0.012616 | 0 |
| chr7 | 38600001 | 38700000 | 676  | 852  | 38650000 | -0.13787 | 0.04183  | 0 |
| chr7 | 40550001 | 40650000 | 783  | 1005 | 40600000 | -0.16415 | 0.019857 | 0 |
| chr7 | 40600001 | 40700000 | 752  | 959  | 40650000 | -0.15484 | 0.026129 | 0 |
| chr7 | 40750001 | 40850000 | 804  | 1023 | 40800000 | -0.15158 | 0.028685 | 0 |
| chr7 | 41550001 | 41650000 | 762  | 968  | 41600000 | -0.14925 | 0.030632 | 0 |
| chr7 | 41700001 | 41800000 | 851  | 1089 | 41750000 | -0.15981 | 0.022598 | 0 |
| chr7 | 41750001 | 41850000 | 859  | 1090 | 41800000 | -0.14764 | 0.032052 | 0 |
| chr7 | 42400001 | 42500000 | 725  | 911  | 42450000 | -0.13351 | 0.046919 | 0 |
| chr7 | 42650001 | 42750000 | 782  | 998  | 42700000 | -0.15591 | 0.02533  | 0 |
| chr7 | 43350001 | 43450000 | 752  | 975  | 43400000 | -0.17871 | 0.012635 | 0 |
| chr7 | 43750001 | 43850000 | 898  | 906  | 43800000 | 0.183167 | 0.010383 | 0 |
| chr7 | 44150001 | 44250000 | 1080 | 1119 | 44200000 | 0.144784 | 0.033749 | 0 |
| chr7 | 44350001 | 44450000 | 1114 | 1155 | 44400000 | 0.143819 | 0.034673 | 0 |

|      |          |          |      |      |          |          |          |   |
|------|----------|----------|------|------|----------|----------|----------|---|
| chr7 | 44600001 | 44700000 | 1009 | 1027 | 44650000 | 0.170453 | 0.015697 | 0 |
| chr7 | 44850001 | 44950000 | 879  | 895  | 44900000 | 0.169939 | 0.015954 | 0 |
| chr7 | 45000001 | 45100000 | 990  | 1028 | 45050000 | 0.141623 | 0.036852 | 0 |
| chr7 | 45100001 | 45200000 | 1171 | 1198 | 45150000 | 0.163076 | 0.019744 | 0 |
| chr7 | 45800001 | 45900000 | 117  | 118  | 45850000 | 0.183685 | 0.010205 | 0 |
| chr7 | 47350001 | 47450000 | 1064 | 1094 | 47400000 | 0.155848 | 0.024539 | 0 |
| chr7 | 47400001 | 47500000 | 1060 | 1079 | 47450000 | 0.170332 | 0.015757 | 0 |
| chr7 | 47600001 | 47700000 | 976  | 1013 | 47650000 | 0.142282 | 0.036187 | 0 |
| chr7 | 48600001 | 48700000 | 675  | 865  | 48650000 | -0.16185 | 0.021272 | 0 |
| chr7 | 49250001 | 49350000 | 634  | 798  | 49300000 | -0.13594 | 0.044018 | 0 |
| chr7 | 49300001 | 49400000 | 627  | 816  | 49350000 | -0.18414 | 0.010596 | 0 |
| chr7 | 49400001 | 49500000 | 673  | 865  | 49450000 | -0.16613 | 0.018702 | 0 |
| chr7 | 49550001 | 49650000 | 618  | 796  | 49600000 | -0.1692  | 0.017029 | 0 |
| chr7 | 49700001 | 49800000 | 595  | 755  | 49750000 | -0.14762 | 0.032062 | 0 |
| chr7 | 49850001 | 49950000 | 661  | 847  | 49900000 | -0.16175 | 0.021336 | 0 |
| chr7 | 50100001 | 50200000 | 660  | 836  | 50150000 | -0.14507 | 0.034411 | 0 |
| chr7 | 50300001 | 50400000 | 578  | 726  | 50350000 | -0.13294 | 0.047619 | 0 |
| chr7 | 50500001 | 50600000 | 949  | 968  | 50550000 | 0.167364 | 0.017296 | 0 |
| chr7 | 50650001 | 50750000 | 917  | 1163 | 50700000 | -0.14689 | 0.03272  | 0 |
| chr7 | 51500001 | 51600000 | 733  | 928  | 51550000 | -0.14435 | 0.035105 | 0 |
| chr7 | 51850001 | 51950000 | 585  | 754  | 51900000 | -0.17016 | 0.016529 | 0 |
| chr7 | 52050001 | 52150000 | 624  | 793  | 52100000 | -0.14981 | 0.030154 | 0 |
| chr7 | 52350001 | 52450000 | 552  | 710  | 52400000 | -0.16719 | 0.018111 | 0 |
| chr7 | 53250001 | 53350000 | 608  | 767  | 53300000 | -0.13919 | 0.040376 | 0 |
| chr7 | 53300001 | 53400000 | 584  | 735  | 53350000 | -0.13581 | 0.044169 | 0 |
| chr7 | 53400001 | 53500000 | 588  | 760  | 53450000 | -0.17422 | 0.014567 | 0 |
| chr7 | 53800001 | 53900000 | 615  | 777  | 53850000 | -0.14137 | 0.038081 | 0 |
| chr7 | 53850001 | 53950000 | 586  | 758  | 53900000 | -0.17533 | 0.014065 | 0 |
| chr7 | 53900001 | 54000000 | 615  | 774  | 53950000 | -0.13578 | 0.044202 | 0 |
| chr7 | 54300001 | 54400000 | 541  | 693  | 54350000 | -0.16126 | 0.021646 | 0 |
| chr7 | 54700001 | 54800000 | 758  | 964  | 54750000 | -0.15087 | 0.029263 | 0 |
| chr7 | 54800001 | 54900000 | 881  | 922  | 54850000 | 0.130338 | 0.049881 | 0 |
| chr7 | 55700001 | 55800000 | 302  | 379  | 55750000 | -0.13169 | 0.049187 | 0 |
| chr7 | 56600001 | 56700000 | 616  | 785  | 56650000 | -0.1538  | 0.026919 | 0 |
| chr7 | 57450001 | 57550000 | 376  | 387  | 57500000 | 0.154362 | 0.025638 | 0 |
| chr7 | 57700001 | 57800000 | 120  | 155  | 57750000 | -0.17327 | 0.015008 | 0 |
| chr7 | 61450001 | 61550000 | 287  | 368  | 61500000 | -0.16269 | 0.020744 | 0 |
| chr7 | 61500001 | 61600000 | 399  | 503  | 61550000 | -0.13821 | 0.041453 | 0 |
| chr7 | 62000001 | 62100000 | 458  | 580  | 62050000 | -0.14474 | 0.034727 | 0 |
| chr7 | 62050001 | 62150000 | 447  | 561  | 62100000 | -0.13176 | 0.049089 | 0 |
| chr7 | 62700001 | 62800000 | 37   | 47   | 62750000 | -0.14917 | 0.030701 | 0 |
| chr7 | 63000001 | 63100000 | 14   | 18   | 63050000 | -0.16661 | 0.018434 | 0 |
| chr7 | 63200001 | 63300000 | 74   | 95   | 63250000 | -0.16444 | 0.019684 | 0 |
| chr7 | 63600001 | 63700000 | 394  | 498  | 63650000 | -0.14199 | 0.037444 | 0 |
| chr7 | 63750001 | 63850000 | 475  | 601  | 63800000 | -0.14347 | 0.035956 | 0 |
| chr7 | 64800001 | 64900000 | 613  | 637  | 64850000 | 0.140557 | 0.03795  | 0 |
| chr7 | 64850001 | 64950000 | 549  | 565  | 64900000 | 0.154518 | 0.02552  | 0 |

|      |          |          |      |      |          |          |          |   |
|------|----------|----------|------|------|----------|----------|----------|---|
| chr7 | 65000001 | 65100000 | 92   | 93   | 65050000 | 0.180366 | 0.011395 | 0 |
| chr7 | 65050001 | 65150000 | 92   | 94   | 65100000 | 0.164936 | 0.018648 | 0 |
| chr7 | 66100001 | 66200000 | 757  | 777  | 66150000 | 0.158342 | 0.022785 | 0 |
| chr7 | 67950001 | 68050000 | 655  | 832  | 6.80E+07 | -0.14913 | 0.030742 | 0 |
| chr7 | 68150001 | 68250000 | 581  | 752  | 68200000 | -0.17623 | 0.013671 | 0 |
| chr7 | 68750001 | 68850000 | 711  | 736  | 68800000 | 0.146107 | 0.032517 | 0 |
| chr7 | 69100001 | 69200000 | 772  | 973  | 69150000 | -0.13788 | 0.04182  | 0 |
| chr7 | 69450001 | 69550000 | 692  | 875  | 69500000 | -0.14255 | 0.036877 | 0 |
| chr7 | 69650001 | 69750000 | 637  | 805  | 69700000 | -0.14173 | 0.037704 | 0 |
| chr7 | 70100001 | 70200000 | 699  | 877  | 70150000 | -0.13132 | 0.049651 | 0 |
| chr7 | 70400001 | 70500000 | 670  | 868  | 70450000 | -0.17757 | 0.013102 | 0 |
| chr7 | 70450001 | 70550000 | 635  | 814  | 70500000 | -0.16231 | 0.020982 | 0 |
| chr7 | 70550001 | 70650000 | 618  | 796  | 70600000 | -0.1692  | 0.017029 | 0 |
| chr7 | 71000001 | 71100000 | 651  | 824  | 71050000 | -0.14402 | 0.035419 | 0 |
| chr7 | 71700001 | 71800000 | 787  | 813  | 71750000 | 0.149071 | 0.029889 | 0 |
| chr7 | 72100001 | 72200000 | 217  | 224  | 72150000 | 0.150159 | 0.02897  | 0 |
| chr7 | 72300001 | 72400000 | 206  | 259  | 72350000 | -0.13434 | 0.045904 | 0 |
| chr7 | 72700001 | 72800000 | 639  | 666  | 72750000 | 0.136257 | 0.042651 | 0 |
| chr7 | 73000001 | 73100000 | 1019 | 1041 | 73050000 | 0.165147 | 0.018527 | 0 |
| chr7 | 73500001 | 73600000 | 820  | 853  | 73550000 | 0.139041 | 0.039556 | 0 |
| chr7 | 73750001 | 73850000 | 814  | 838  | 73800000 | 0.154042 | 0.02588  | 0 |
| chr7 | 73900001 | 74000000 | 870  | 906  | 73950000 | 0.137467 | 0.041282 | 0 |
| chr7 | 74000001 | 74100000 | 770  | 802  | 74050000 | 0.137219 | 0.04156  | 0 |
| chr7 | 75200001 | 75300000 | 872  | 898  | 75250000 | 0.153576 | 0.026236 | 0 |
| chr7 | 75250001 | 75350000 | 839  | 877  | 75300000 | 0.132057 | 0.047687 | 0 |
| chr7 | 75350001 | 75450000 | 738  | 746  | 75400000 | 0.180408 | 0.011379 | 0 |
| chr7 | 75850001 | 75950000 | 958  | 997  | 75900000 | 0.138395 | 0.040257 | 0 |
| chr7 | 76150001 | 76250000 | 72   | 75   | 76200000 | 0.137069 | 0.041728 | 0 |
| chr7 | 77150001 | 77250000 | 808  | 834  | 77200000 | 0.150271 | 0.028877 | 0 |
| chr7 | 77250001 | 77350000 | 795  | 822  | 77300000 | 0.14778  | 0.031012 | 0 |
| chr7 | 77800001 | 77900000 | 731  | 922  | 77850000 | -0.13893 | 0.040658 | 0 |
| chr7 | 78150001 | 78250000 | 670  | 853  | 78200000 | -0.15242 | 0.028002 | 0 |
| chr7 | 78500001 | 78600000 | 588  | 743  | 78550000 | -0.14158 | 0.037857 | 0 |
| chr7 | 78800001 | 78900000 | 595  | 773  | 78850000 | -0.18162 | 0.011504 | 0 |
| chr7 | 79050001 | 79150000 | 621  | 807  | 79100000 | -0.18201 | 0.011357 | 0 |
| chr7 | 79100001 | 79200000 | 648  | 837  | 79150000 | -0.17327 | 0.015008 | 0 |
| chr7 | 79250001 | 79350000 | 633  | 800  | 79300000 | -0.14183 | 0.037602 | 0 |
| chr7 | 80350001 | 80450000 | 787  | 1003 | 80400000 | -0.15392 | 0.026824 | 0 |
| chr7 | 80750001 | 80850000 | 702  | 895  | 80800000 | -0.15445 | 0.026417 | 0 |
| chr7 | 80800001 | 80900000 | 736  | 929  | 80850000 | -0.14001 | 0.039499 | 0 |
| chr7 | 81100001 | 81200000 | 656  | 839  | 81150000 | -0.15901 | 0.023135 | 0 |
| chr7 | 81150001 | 81250000 | 682  | 872  | 81200000 | -0.15859 | 0.023421 | 0 |
| chr7 | 81250001 | 81350000 | 658  | 857  | 81300000 | -0.18524 | 0.010219 | 0 |
| chr7 | 81550001 | 81650000 | 601  | 755  | 81600000 | -0.13315 | 0.047358 | 0 |
| chr7 | 81650001 | 81750000 | 641  | 829  | 81700000 | -0.17508 | 0.014176 | 0 |
| chr7 | 81700001 | 81800000 | 628  | 788  | 81750000 | -0.13147 | 0.049464 | 0 |
| chr7 | 82500001 | 82600000 | 653  | 833  | 82550000 | -0.15527 | 0.025802 | 0 |

|      |          |          |      |      |          |          |          |   |
|------|----------|----------|------|------|----------|----------|----------|---|
| chr7 | 83100001 | 83200000 | 570  | 735  | 83150000 | -0.17082 | 0.016198 | 0 |
| chr7 | 83150001 | 83250000 | 628  | 796  | 83200000 | -0.14604 | 0.033504 | 0 |
| chr7 | 83250001 | 83350000 | 584  | 734  | 83300000 | -0.13385 | 0.046503 | 0 |
| chr7 | 83500001 | 83600000 | 641  | 829  | 83550000 | -0.17508 | 0.014176 | 0 |
| chr7 | 83550001 | 83650000 | 643  | 809  | 83600000 | -0.13536 | 0.044701 | 0 |
| chr7 | 83600001 | 83700000 | 560  | 724  | 83650000 | -0.1746  | 0.014394 | 0 |
| chr7 | 84900001 | 85000000 | 602  | 766  | 84950000 | -0.15162 | 0.028651 | 0 |
| chr7 | 85400001 | 85500000 | 627  | 795  | 85450000 | -0.14653 | 0.033056 | 0 |
| chr7 | 85600001 | 85700000 | 642  | 816  | 85650000 | -0.15003 | 0.029966 | 0 |
| chr7 | 85900001 | 86000000 | 584  | 735  | 85950000 | -0.13581 | 0.044169 | 0 |
| chr7 | 86300001 | 86400000 | 719  | 932  | 86350000 | -0.17838 | 0.012769 | 0 |
| chr7 | 87800001 | 87900000 | 941  | 976  | 87850000 | 0.143277 | 0.035201 | 0 |
| chr7 | 87850001 | 87950000 | 943  | 980  | 87900000 | 0.140439 | 0.038073 | 0 |
| chr7 | 87950001 | 88050000 | 765  | 973  | 8.80E+07 | -0.15102 | 0.029143 | 0 |
| chr7 | 88100001 | 88200000 | 721  | 935  | 88150000 | -0.179   | 0.012515 | 0 |
| chr7 | 88500001 | 88600000 | 633  | 820  | 88550000 | -0.17746 | 0.01315  | 0 |
| chr7 | 88550001 | 88650000 | 650  | 829  | 88600000 | -0.15497 | 0.026027 | 0 |
| chr7 | 88700001 | 88800000 | 646  | 813  | 88750000 | -0.13576 | 0.044232 | 0 |
| chr7 | 89250001 | 89350000 | 575  | 739  | 89300000 | -0.16605 | 0.018749 | 0 |
| chr7 | 89650001 | 89750000 | 524  | 667  | 89700000 | -0.15216 | 0.028214 | 0 |
| chr7 | 89950001 | 90050000 | 786  | 808  | 9.00E+07 | 0.156137 | 0.02433  | 0 |
| chr7 | 90150001 | 90250000 | 610  | 766  | 90200000 | -0.13257 | 0.048072 | 0 |
| chr7 | 90250001 | 90350000 | 625  | 786  | 90300000 | -0.13471 | 0.045467 | 0 |
| chr7 | 90350001 | 90450000 | 584  | 756  | 90400000 | -0.17645 | 0.013575 | 0 |
| chr7 | 90600001 | 90700000 | 652  | 825  | 90650000 | -0.14356 | 0.035873 | 0 |
| chr7 | 91350001 | 91450000 | 618  | 789  | 91400000 | -0.15646 | 0.024931 | 0 |
| chr7 | 92150001 | 92250000 | 907  | 939  | 92200000 | 0.14594  | 0.03267  | 0 |
| chr7 | 92200001 | 92300000 | 997  | 1011 | 92250000 | 0.175845 | 0.01321  | 0 |
| chr7 | 92350001 | 92450000 | 988  | 1032 | 92400000 | 0.133103 | 0.04639  | 0 |
| chr7 | 92800001 | 92900000 | 908  | 940  | 92850000 | 0.145995 | 0.03262  | 0 |
| chr7 | 92850001 | 92950000 | 864  | 888  | 92900000 | 0.156435 | 0.024117 | 0 |
| chr7 | 93350001 | 93450000 | 720  | 916  | 93400000 | -0.15139 | 0.028839 | 0 |
| chr7 | 94300001 | 94400000 | 741  | 753  | 94350000 | 0.172787 | 0.014575 | 0 |
| chr7 | 94450001 | 94550000 | 697  | 879  | 94500000 | -0.13874 | 0.040866 | 0 |
| chr7 | 95300001 | 95400000 | 786  | 992  | 95350000 | -0.13985 | 0.039672 | 0 |
| chr7 | 96250001 | 96350000 | 822  | 857  | 96300000 | 0.135806 | 0.04317  | 0 |
| chr7 | 96650001 | 96750000 | 733  | 763  | 96700000 | 0.138093 | 0.040588 | 0 |
| chr7 | 96800001 | 96900000 | 570  | 716  | 96850000 | -0.13303 | 0.047499 | 0 |
| chr7 | 96850001 | 96950000 | 571  | 724  | 96900000 | -0.14654 | 0.033047 | 0 |
| chr7 | 97200001 | 97300000 | 639  | 805  | 97250000 | -0.13721 | 0.042567 | 0 |
| chr7 | 97450001 | 97550000 | 423  | 439  | 97500000 | 0.1424   | 0.036069 | 0 |
| chr7 | 97950001 | 98050000 | 856  | 887  | 9.80E+07 | 0.14464  | 0.033886 | 0 |
| chr7 | 98850001 | 98950000 | 926  | 963  | 98900000 | 0.139439 | 0.039129 | 0 |
| chr7 | 98950001 | 99050000 | 928  | 962  | 9.90E+07 | 0.144051 | 0.034449 | 0 |
| chr7 | 99450001 | 99550000 | 938  | 975  | 99500000 | 0.140149 | 0.038377 | 0 |
| chr7 | 99500001 | 99600000 | 940  | 977  | 99550000 | 0.140265 | 0.038254 | 0 |
| chr7 | 1E+08    | 1E+08    | 1076 | 1098 | 1E+08    | 0.166763 | 0.017622 | 0 |

|      |          |          |      |      |          |          |          |   |
|------|----------|----------|------|------|----------|----------|----------|---|
| chr7 | 1E+08    | 1E+08    | 988  | 1005 | 1E+08    | 0.17135  | 0.015257 | 0 |
| chr7 | 1E+08    | 1E+08    | 1094 | 1104 | 1E+08    | 0.182836 | 0.010498 | 0 |
| chr7 | 1E+08    | 1E+08    | 860  | 900  | 1E+08    | 0.130375 | 0.049834 | 0 |
| chr7 | 1.01E+08 | 1.01E+08 | 879  | 890  | 1.01E+08 | 0.178021 | 0.012307 | 0 |
| chr7 | 1.01E+08 | 1.02E+08 | 1003 | 1015 | 1.02E+08 | 0.178805 | 0.011996 | 0 |
| chr7 | 1.02E+08 | 1.02E+08 | 892  | 919  | 1.02E+08 | 0.152942 | 0.026726 | 0 |
| chr7 | 1.02E+08 | 1.02E+08 | 29   | 30   | 1.02E+08 | 0.147053 | 0.031658 | 0 |
| chr7 | 1.02E+08 | 1.02E+08 | 132  | 138  | 1.02E+08 | 0.131833 | 0.047969 | 0 |
| chr7 | 1.03E+08 | 1.03E+08 | 833  | 864  | 1.03E+08 | 0.143248 | 0.035229 | 0 |
| chr7 | 1.04E+08 | 1.04E+08 | 797  | 821  | 1.04E+08 | 0.153161 | 0.026556 | 0 |
| chr7 | 1.06E+08 | 1.06E+08 | 780  | 814  | 1.06E+08 | 0.134408 | 0.044812 | 0 |
| chr7 | 1.08E+08 | 1.08E+08 | 666  | 854  | 1.08E+08 | -0.16275 | 0.020707 | 0 |
| chr7 | 1.08E+08 | 1.08E+08 | 809  | 817  | 1.08E+08 | 0.181767 | 0.010879 | 0 |
| chr7 | 1.08E+08 | 1.08E+08 | 824  | 861  | 1.08E+08 | 0.132594 | 0.047017 | 0 |
| chr7 | 1.08E+08 | 1.09E+08 | 688  | 878  | 1.09E+08 | -0.15585 | 0.025373 | 0 |
| chr7 | 1.09E+08 | 1.09E+08 | 607  | 778  | 1.09E+08 | -0.16211 | 0.021107 | 0 |
| chr7 | 1.09E+08 | 1.09E+08 | 585  | 756  | 1.09E+08 | -0.17399 | 0.014675 | 0 |
| chr7 | 1.09E+08 | 1.09E+08 | 631  | 801  | 1.09E+08 | -0.1482  | 0.03155  | 0 |
| chr7 | 1.09E+08 | 1.09E+08 | 596  | 752  | 1.09E+08 | -0.13946 | 0.04009  | 0 |
| chr7 | 1.09E+08 | 1.09E+08 | 596  | 776  | 1.09E+08 | -0.18478 | 0.010376 | 0 |
| chr7 | 1.09E+08 | 1.09E+08 | 547  | 690  | 1.09E+08 | -0.13909 | 0.040484 | 0 |
| chr7 | 1.09E+08 | 1.1E+08  | 560  | 721  | 1.09E+08 | -0.16861 | 0.01734  | 0 |
| chr7 | 1.1E+08  | 1.1E+08  | 672  | 855  | 1.1E+08  | -0.1515  | 0.028747 | 0 |
| chr7 | 1.1E+08  | 1.1E+08  | 619  | 801  | 1.10E+08 | -0.1759  | 0.013816 | 0 |
| chr7 | 1.1E+08  | 1.1E+08  | 685  | 880  | 1.1E+08  | -0.16544 | 0.0191   | 0 |
| chr7 | 1.1E+08  | 1.1E+08  | 634  | 814  | 1.1E+08  | -0.16458 | 0.019599 | 0 |
| chr7 | 1.1E+08  | 1.11E+08 | 702  | 910  | 1.1E+08  | -0.17843 | 0.012746 | 0 |
| chr7 | 1.12E+08 | 1.12E+08 | 648  | 838  | 1.12E+08 | -0.17499 | 0.014217 | 0 |
| chr7 | 1.13E+08 | 1.13E+08 | 627  | 800  | 1.13E+08 | -0.15557 | 0.025578 | 0 |
| chr7 | 1.13E+08 | 1.13E+08 | 592  | 769  | 1.13E+08 | -0.18142 | 0.011576 | 0 |
| chr7 | 1.14E+08 | 1.14E+08 | 648  | 826  | 1.14E+08 | -0.15418 | 0.026623 | 0 |
| chr7 | 1.14E+08 | 1.14E+08 | 656  | 830  | 1.14E+08 | -0.14345 | 0.035978 | 0 |
| chr7 | 1.14E+08 | 1.14E+08 | 717  | 901  | 1.14E+08 | -0.13359 | 0.046816 | 0 |
| chr7 | 1.15E+08 | 1.15E+08 | 711  | 916  | 1.15E+08 | -0.16954 | 0.016854 | 0 |
| chr7 | 1.15E+08 | 1.15E+08 | 703  | 885  | 1.15E+08 | -0.13619 | 0.043732 | 0 |
| chr7 | 1.16E+08 | 1.16E+08 | 703  | 897  | 1.16E+08 | -0.15562 | 0.025542 | 0 |
| chr7 | 1.16E+08 | 1.16E+08 | 663  | 841  | 1.16E+08 | -0.14713 | 0.032503 | 0 |
| chr7 | 1.16E+08 | 1.16E+08 | 694  | 876  | 1.16E+08 | -0.14003 | 0.039476 | 0 |
| chr7 | 1.16E+08 | 1.16E+08 | 892  | 920  | 1.16E+08 | 0.151373 | 0.027973 | 0 |
| chr7 | 1.17E+08 | 1.17E+08 | 745  | 936  | 1.17E+08 | -0.13331 | 0.047166 | 0 |
| chr7 | 1.18E+08 | 1.18E+08 | 697  | 877  | 1.18E+08 | -0.13546 | 0.044586 | 0 |
| chr7 | 1.18E+08 | 1.18E+08 | 615  | 774  | 1.18E+08 | -0.13578 | 0.044202 | 0 |
| chr7 | 1.18E+08 | 1.18E+08 | 617  | 797  | 1.18E+08 | -0.17335 | 0.014972 | 0 |
| chr7 | 1.18E+08 | 1.18E+08 | 623  | 805  | 1.18E+08 | -0.17379 | 0.014764 | 0 |
| chr7 | 1.18E+08 | 1.19E+08 | 629  | 806  | 1.18E+08 | -0.16176 | 0.02133  | 0 |
| chr7 | 1.19E+08 | 1.19E+08 | 609  | 769  | 1.19E+08 | -0.14058 | 0.038899 | 0 |
| chr7 | 1.19E+08 | 1.19E+08 | 608  | 780  | 1.19E+08 | -0.16344 | 0.020284 | 0 |

|      |          |          |      |      |          |          |          |   |
|------|----------|----------|------|------|----------|----------|----------|---|
| chr7 | 1.19E+08 | 1.19E+08 | 626  | 786  | 1.19E+08 | -0.1324  | 0.048283 | 0 |
| chr7 | 1.19E+08 | 1.19E+08 | 541  | 698  | 1.19E+08 | -0.17164 | 0.015793 | 0 |
| chr7 | 1.19E+08 | 1.19E+08 | 555  | 707  | 1.19E+08 | -0.15326 | 0.027339 | 0 |
| chr7 | 1.19E+08 | 1.19E+08 | 588  | 741  | 1.19E+08 | -0.13769 | 0.042023 | 0 |
| chr7 | 1.19E+08 | 1.19E+08 | 614  | 774  | 1.19E+08 | -0.13813 | 0.041536 | 0 |
| chr7 | 1.2E+08  | 1.2E+08  | 556  | 706  | 1.2E+08  | -0.14862 | 0.031181 | 0 |
| chr7 | 1.2E+08  | 1.2E+08  | 637  | 825  | 1.20E+08 | -0.17714 | 0.013284 | 0 |
| chr7 | 1.2E+08  | 1.2E+08  | 633  | 809  | 1.2E+08  | -0.15797 | 0.023853 | 0 |
| chr7 | 1.2E+08  | 1.2E+08  | 620  | 792  | 1.2E+08  | -0.15727 | 0.024347 | 0 |
| chr7 | 1.21E+08 | 1.21E+08 | 750  | 784  | 1.21E+08 | 0.132    | 0.047759 | 0 |
| chr7 | 1.21E+08 | 1.21E+08 | 619  | 801  | 1.21E+08 | -0.1759  | 0.013816 | 0 |
| chr7 | 1.22E+08 | 1.22E+08 | 580  | 735  | 1.22E+08 | -0.14573 | 0.033795 | 0 |
| chr7 | 1.22E+08 | 1.22E+08 | 532  | 687  | 1.22E+08 | -0.17292 | 0.015173 | 0 |
| chr7 | 1.22E+08 | 1.22E+08 | 647  | 821  | 1.22E+08 | -0.14765 | 0.032035 | 0 |
| chr7 | 1.22E+08 | 1.22E+08 | 596  | 757  | 1.22E+08 | -0.14902 | 0.030835 | 0 |
| chr7 | 1.23E+08 | 1.23E+08 | 643  | 815  | 1.23E+08 | -0.14602 | 0.033525 | 0 |
| chr7 | 1.24E+08 | 1.24E+08 | 654  | 827  | 1.24E+08 | -0.14263 | 0.036791 | 0 |
| chr7 | 1.24E+08 | 1.24E+08 | 624  | 796  | 1.24E+08 | -0.15526 | 0.02581  | 0 |
| chr7 | 1.24E+08 | 1.24E+08 | 656  | 852  | 1.24E+08 | -0.18119 | 0.011662 | 0 |
| chr7 | 1.24E+08 | 1.24E+08 | 679  | 873  | 1.24E+08 | -0.16661 | 0.018434 | 0 |
| chr7 | 1.24E+08 | 1.24E+08 | 692  | 893  | 1.24E+08 | -0.17193 | 0.015651 | 0 |
| chr7 | 1.24E+08 | 1.24E+08 | 583  | 739  | 1.24E+08 | -0.14612 | 0.033435 | 0 |
| chr7 | 1.24E+08 | 1.24E+08 | 721  | 745  | 1.24E+08 | 0.148722 | 0.030189 | 0 |
| chr7 | 1.25E+08 | 1.25E+08 | 603  | 780  | 1.25E+08 | -0.17535 | 0.014057 | 0 |
| chr7 | 1.25E+08 | 1.25E+08 | 565  | 720  | 1.25E+08 | -0.15378 | 0.026932 | 0 |
| chr7 | 1.25E+08 | 1.25E+08 | 648  | 815  | 1.25E+08 | -0.13484 | 0.045309 | 0 |
| chr7 | 1.25E+08 | 1.25E+08 | 654  | 838  | 1.25E+08 | -0.1617  | 0.021369 | 0 |
| chr7 | 1.25E+08 | 1.25E+08 | 647  | 837  | 1.25E+08 | -0.1755  | 0.013992 | 0 |
| chr7 | 1.26E+08 | 1.26E+08 | 562  | 710  | 1.26E+08 | -0.14129 | 0.038162 | 0 |
| chr7 | 1.26E+08 | 1.26E+08 | 644  | 810  | 1.26E+08 | -0.1349  | 0.045243 | 0 |
| chr7 | 1.26E+08 | 1.27E+08 | 477  | 619  | 1.27E+08 | -0.17999 | 0.012126 | 0 |
| chr7 | 1.27E+08 | 1.27E+08 | 960  | 989  | 1.27E+08 | 0.153027 | 0.02666  | 0 |
| chr7 | 1.28E+08 | 1.28E+08 | 977  | 1008 | 1.28E+08 | 0.150898 | 0.028359 | 0 |
| chr7 | 1.28E+08 | 1.28E+08 | 1025 | 1039 | 1.28E+08 | 0.176391 | 0.012978 | 0 |
| chr7 | 1.28E+08 | 1.28E+08 | 1035 | 1050 | 1.28E+08 | 0.175204 | 0.013486 | 0 |
| chr7 | 1.28E+08 | 1.28E+08 | 143  | 149  | 1.28E+08 | 0.136666 | 0.042184 | 0 |
| chr7 | 1.28E+08 | 1.29E+08 | 1123 | 1172 | 1.28E+08 | 0.134348 | 0.044883 | 0 |
| chr7 | 1.28E+08 | 1.29E+08 | 1174 | 1184 | 1.29E+08 | 0.183726 | 0.010191 | 0 |
| chr7 | 1.29E+08 | 1.29E+08 | 1006 | 1041 | 1.29E+08 | 0.146623 | 0.032046 | 0 |
| chr7 | 1.29E+08 | 1.29E+08 | 876  | 888  | 1.29E+08 | 0.176334 | 0.013002 | 0 |
| chr7 | 1.29E+08 | 1.29E+08 | 952  | 964  | 1.29E+08 | 0.177891 | 0.01236  | 0 |
| chr7 | 1.29E+08 | 1.29E+08 | 895  | 908  | 1.29E+08 | 0.175158 | 0.013506 | 0 |
| chr7 | 1.29E+08 | 1.29E+08 | 1070 | 1110 | 1.29E+08 | 0.143014 | 0.035459 | 0 |
| chr7 | 1.3E+08  | 1.3E+08  | 816  | 835  | 1.3E+08  | 0.162756 | 0.019939 | 0 |
| chr7 | 1.3E+08  | 1.3E+08  | 713  | 734  | 1.3E+08  | 0.154085 | 0.025847 | 0 |
| chr7 | 1.31E+08 | 1.31E+08 | 1037 | 1046 | 1.31E+08 | 0.183496 | 0.010269 | 0 |
| chr7 | 1.31E+08 | 1.31E+08 | 986  | 1013 | 1.31E+08 | 0.156988 | 0.023723 | 0 |

|      |          |          |     |      |          |          |          |   |
|------|----------|----------|-----|------|----------|----------|----------|---|
| chr7 | 1.31E+08 | 1.31E+08 | 932 | 964  | 1.31E+08 | 0.14726  | 0.031473 | 0 |
| chr7 | 1.31E+08 | 1.31E+08 | 948 | 991  | 1.31E+08 | 0.131965 | 0.047802 | 0 |
| chr7 | 1.32E+08 | 1.32E+08 | 713 | 903  | 1.32E+08 | -0.14486 | 0.034614 | 0 |
| chr7 | 1.32E+08 | 1.32E+08 | 841 | 1068 | 1.32E+08 | -0.14877 | 0.031049 | 0 |
| chr7 | 1.34E+08 | 1.34E+08 | 714 | 918  | 1.34E+08 | -0.16661 | 0.018434 | 0 |
| chr7 | 1.34E+08 | 1.34E+08 | 739 | 929  | 1.34E+08 | -0.13414 | 0.046149 | 0 |
| chr7 | 1.34E+08 | 1.34E+08 | 669 | 860  | 1.34E+08 | -0.16637 | 0.018568 | 0 |
| chr7 | 1.35E+08 | 1.35E+08 | 690 | 877  | 1.35E+08 | -0.15002 | 0.029979 | 0 |
| chr7 | 1.35E+08 | 1.35E+08 | 854 | 861  | 1.35E+08 | 0.184186 | 0.010035 | 0 |
| chr7 | 1.36E+08 | 1.36E+08 | 678 | 877  | 1.36E+08 | -0.17533 | 0.014067 | 0 |
| chr7 | 1.36E+08 | 1.36E+08 | 669 | 860  | 1.36E+08 | -0.16637 | 0.018568 | 0 |
| chr7 | 1.36E+08 | 1.36E+08 | 651 | 824  | 1.36E+08 | -0.14402 | 0.035419 | 0 |
| chr7 | 1.36E+08 | 1.36E+08 | 596 | 760  | 1.36E+08 | -0.15472 | 0.026212 | 0 |
| chr7 | 1.36E+08 | 1.37E+08 | 528 | 687  | 1.37E+08 | -0.18381 | 0.010712 | 0 |
| chr7 | 1.37E+08 | 1.37E+08 | 626 | 797  | 1.37E+08 | -0.15245 | 0.027976 | 0 |
| chr7 | 1.37E+08 | 1.37E+08 | 638 | 825  | 1.37E+08 | -0.17487 | 0.01427  | 0 |
| chr7 | 1.37E+08 | 1.37E+08 | 571 | 742  | 1.37E+08 | -0.18197 | 0.011375 | 0 |
| chr7 | 1.37E+08 | 1.38E+08 | 738 | 926  | 1.38E+08 | -0.13143 | 0.049515 | 0 |
| chr7 | 1.38E+08 | 1.39E+08 | 861 | 901  | 1.39E+08 | 0.130449 | 0.049737 | 0 |
| chr7 | 1.39E+08 | 1.39E+08 | 961 | 997  | 1.39E+08 | 0.142906 | 0.035566 | 0 |
| chr7 | 1.39E+08 | 1.39E+08 | 900 | 931  | 1.39E+08 | 0.147107 | 0.03161  | 0 |
| chr7 | 1.39E+08 | 1.39E+08 | 934 | 972  | 1.39E+08 | 0.138429 | 0.04022  | 0 |
| chr7 | 1.39E+08 | 1.39E+08 | 846 | 863  | 1.39E+08 | 0.16726  | 0.017352 | 0 |
| chr7 | 1.4E+08  | 1.4E+08  | 829 | 1051 | 1.4E+08  | -0.14636 | 0.033213 | 0 |
| chr7 | 1.4E+08  | 1.4E+08  | 870 | 901  | 1.4E+08  | 0.145451 | 0.033123 | 0 |
| chr7 | 1.4E+08  | 1.4E+08  | 714 | 726  | 1.4E+08  | 0.171918 | 0.014985 | 0 |
| chr7 | 1.4E+08  | 1.4E+08  | 706 | 888  | 1.4E+08  | -0.13493 | 0.045208 | 0 |
| chr7 | 1.4E+08  | 1.4E+08  | 756 | 785  | 1.4E+08  | 0.141657 | 0.036818 | 0 |
| chr7 | 1.4E+08  | 1.41E+08 | 704 | 913  | 1.41E+08 | -0.17908 | 0.012486 | 0 |
| chr7 | 1.43E+08 | 1.43E+08 | 732 | 921  | 1.43E+08 | -0.13539 | 0.044658 | 0 |
| chr7 | 1.44E+08 | 1.44E+08 | 649 | 826  | 1.44E+08 | -0.15196 | 0.028373 | 0 |
| chr7 | 1.44E+08 | 1.45E+08 | 647 | 817  | 1.44E+08 | -0.14061 | 0.038869 | 0 |
| chr7 | 1.45E+08 | 1.45E+08 | 628 | 799  | 1.45E+08 | -0.15147 | 0.028773 | 0 |
| chr7 | 1.45E+08 | 1.45E+08 | 563 | 725  | 1.45E+08 | -0.16888 | 0.017195 | 0 |
| chr7 | 1.45E+08 | 1.45E+08 | 548 | 711  | 1.45E+08 | -0.17971 | 0.012234 | 0 |
| chr7 | 1.45E+08 | 1.45E+08 | 550 | 707  | 1.45E+08 | -0.16632 | 0.018598 | 0 |
| chr7 | 1.45E+08 | 1.45E+08 | 610 | 771  | 1.45E+08 | -0.14196 | 0.037473 | 0 |
| chr7 | 1.46E+08 | 1.46E+08 | 611 | 776  | 1.46E+08 | -0.14892 | 0.030918 | 0 |
| chr7 | 1.46E+08 | 1.46E+08 | 585 | 736  | 1.46E+08 | -0.13531 | 0.044762 | 0 |
| chr7 | 1.47E+08 | 1.47E+08 | 517 | 664  | 1.47E+08 | -0.16506 | 0.019321 | 0 |
| chr7 | 1.47E+08 | 1.47E+08 | 592 | 749  | 1.47E+08 | -0.14341 | 0.036024 | 0 |
| chr7 | 1.47E+08 | 1.47E+08 | 594 | 748  | 1.47E+08 | -0.13661 | 0.043246 | 0 |
| chr7 | 1.47E+08 | 1.47E+08 | 597 | 768  | 1.47E+08 | -0.16741 | 0.017987 | 0 |
| chr7 | 1.47E+08 | 1.47E+08 | 613 | 784  | 1.47E+08 | -0.159   | 0.023141 | 0 |
| chr7 | 1.49E+08 | 1.49E+08 | 907 | 939  | 1.49E+08 | 0.14594  | 0.03267  | 0 |
| chr7 | 1.49E+08 | 1.49E+08 | 890 | 924  | 1.49E+08 | 0.141876 | 0.036596 | 0 |
| chr7 | 1.49E+08 | 1.49E+08 | 854 | 883  | 1.49E+08 | 0.147786 | 0.031006 | 0 |



|      |          |          |      |      |          |          |          |   |
|------|----------|----------|------|------|----------|----------|----------|---|
| chr7 | 1.49E+08 | 1.49E+08 | 989  | 1019 | 1.49E+08 | 0.152851 | 0.026796 | 0 |
| chr7 | 1.49E+08 | 1.5E+08  | 1177 | 1201 | 1.5E+08  | 0.166841 | 0.01758  | 0 |
| chr7 | 1.5E+08  | 1.5E+08  | 92   | 96   | 1.5E+08  | 0.134562 | 0.044628 | 0 |
| chr7 | 1.5E+08  | 1.5E+08  | 76   | 97   | 1.5E+08  | -0.15602 | 0.025246 | 0 |
| chr7 | 1.5E+08  | 1.51E+08 | 885  | 920  | 1.5E+08  | 0.140007 | 0.038526 | 0 |
| chr7 | 1.51E+08 | 1.51E+08 | 997  | 1031 | 1.51E+08 | 0.147584 | 0.031184 | 0 |
| chr7 | 1.51E+08 | 1.51E+08 | 1035 | 1068 | 1.51E+08 | 0.150682 | 0.028537 | 0 |
| chr7 | 1.52E+08 | 1.52E+08 | 962  | 1006 | 1.52E+08 | 0.131442 | 0.048464 | 0 |
| chr7 | 1.52E+08 | 1.52E+08 | 784  | 813  | 1.52E+08 | 0.143561 | 0.034923 | 0 |
| chr7 | 1.53E+08 | 1.53E+08 | 674  | 849  | 1.53E+08 | -0.13705 | 0.042745 | 0 |
| chr7 | 1.53E+08 | 1.53E+08 | 628  | 812  | 1.53E+08 | -0.17475 | 0.014326 | 0 |
| chr7 | 1.54E+08 | 1.54E+08 | 519  | 535  | 1.54E+08 | 0.152159 | 0.027342 | 0 |
| chr7 | 1.54E+08 | 1.54E+08 | 117  | 118  | 1.54E+08 | 0.183685 | 0.010205 | 0 |
| chr7 | 1.55E+08 | 1.55E+08 | 1069 | 1111 | 1.55E+08 | 0.140366 | 0.038149 | 0 |
| chr7 | 1.55E+08 | 1.55E+08 | 1126 | 1159 | 1.55E+08 | 0.154289 | 0.025693 | 0 |
| chr7 | 1.57E+08 | 1.57E+08 | 815  | 845  | 1.57E+08 | 0.143812 | 0.03468  | 0 |
| chr7 | 1.57E+08 | 1.57E+08 | 1021 | 1066 | 1.57E+08 | 0.133738 | 0.045616 | 0 |
| chr7 | 1.57E+08 | 1.57E+08 | 947  | 975  | 1.57E+08 | 0.153925 | 0.025968 | 0 |
| chr7 | 1.57E+08 | 1.57E+08 | 1012 | 1046 | 1.57E+08 | 0.148289 | 0.030564 | 0 |
| chr7 | 1.57E+08 | 1.57E+08 | 928  | 948  | 1.57E+08 | 0.165201 | 0.018497 | 0 |
| chr7 | 1.57E+08 | 1.57E+08 | 935  | 953  | 1.57E+08 | 0.168453 | 0.016717 | 0 |
| chr7 | 1.57E+08 | 1.57E+08 | 1049 | 1090 | 1.57E+08 | 0.14065  | 0.037853 | 0 |
| chr7 | 1.57E+08 | 1.57E+08 | 1115 | 1136 | 1.57E+08 | 0.169044 | 0.01641  | 0 |
| chr7 | 1.57E+08 | 1.57E+08 | 1153 | 1167 | 1.57E+08 | 0.178551 | 0.012096 | 0 |
| chr7 | 1.58E+08 | 1.58E+08 | 1058 | 1104 | 1.58E+08 | 0.134562 | 0.044628 | 0 |
| chr7 | 1.58E+08 | 1.58E+08 | 965  | 1009 | 1.58E+08 | 0.131638 | 0.048215 | 0 |
| chr7 | 1.58E+08 | 1.58E+08 | 878  | 904  | 1.58E+08 | 0.153861 | 0.026017 | 0 |
| chr7 | 1.58E+08 | 1.58E+08 | 1006 | 1018 | 1.58E+08 | 0.178856 | 0.011976 | 0 |
| chr7 | 1.59E+08 | 1.59E+08 | 1065 | 1091 | 1.59E+08 | 0.161165 | 0.020927 | 0 |
| chr8 | 1        | 100000   | 9    | 19   | 50000    | -0.88204 | 1.52E-24 | 0 |
| chr8 | 50001    | 150000   | 3    | 4    | 1.00E+05 | -0.21907 | 0.003112 | 0 |
| chr8 | 100001   | 200000   | 218  | 286  | 150000   | -0.19572 | 0.007187 | 0 |
| chr8 | 2800001  | 2900000  | 616  | 817  | 2850000  | -0.21144 | 0.004124 | 0 |
| chr8 | 3300001  | 3400000  | 616  | 809  | 3350000  | -0.19725 | 0.00682  | 0 |
| chr8 | 4400001  | 4500000  | 589  | 796  | 4450000  | -0.23854 | 0.001466 | 0 |
| chr8 | 5800001  | 5900000  | 684  | 913  | 5850000  | -0.22066 | 0.002933 | 0 |
| chr8 | 6900001  | 7000000  | 298  | 396  | 6950000  | -0.21423 | 0.003725 | 0 |
| chr8 | 6950001  | 7050000  | 69   | 60   | 7.00E+06 | 0.397597 | 3.14E-07 | 0 |
| chr8 | 7000001  | 7100000  | 24   | 16   | 7050000  | 0.780926 | 1.60E-21 | 0 |
| chr8 | 7050001  | 7150000  | 1    | 2    | 7100000  | -0.80404 | 3.29E-21 | 0 |
| chr8 | 7200001  | 7300000  | 32   | 31   | 7250000  | 0.241767 | 0.00115  | 0 |
| chr8 | 7300001  | 7400000  | 12   | 25   | 7350000  | -0.86293 | 1.02E-23 | 0 |
| chr8 | 7350001  | 7450000  | 3    | 8    | 7400000  | -1.21907 | 5.55E-40 | 0 |
| chr8 | 7400001  | 7500000  | 1    | 1    | 7450000  | 0.195963 | 0.006694 | 0 |
| chr8 | 7450001  | 7550000  | 1    | 1    | 7500000  | 0.195963 | 0.006694 | 0 |
| chr8 | 7500001  | 7600000  | 2    | 1    | 7550000  | 1.195963 | 1.84E-42 | 0 |
| chr8 | 7550001  | 7650000  | 9    | 4    | 7600000  | 1.365888 | 1.42E-51 | 0 |

|      |          |          |      |      |          |          |           |   |
|------|----------|----------|------|------|----------|----------|-----------|---|
| chr8 | 7600001  | 7700000  | 13   | 11   | 7650000  | 0.436971 | 2.34E-08  | 0 |
| chr8 | 7650001  | 7750000  | 7    | 11   | 7700000  | -0.45611 | 1.21E-08  | 0 |
| chr8 | 7700001  | 7800000  | 10   | 21   | 7750000  | -0.87443 | 3.25E-24  | 0 |
| chr8 | 7750001  | 7850000  | 8    | 18   | 7800000  | -0.97396 | 1.25E-28  | 0 |
| chr8 | 7800001  | 7900000  | 2    | 4    | 7850000  | -0.80404 | 3.29E-21  | 0 |
| chr8 | 7850001  | 7950000  | 4    | 4    | 7900000  | 0.195963 | 0.006694  | 0 |
| chr8 | 7900001  | 8000000  | 4    | 1    | 7950000  | 2.195963 | 8.22E-92  | 0 |
| chr8 | 7950001  | 8050000  | 5    | 1    | 8.00E+06 | 2.517891 | 5.45E-104 | 0 |
| chr8 | 8000001  | 8100000  | 90   | 73   | 8050000  | 0.497992 | 2.82E-10  | 0 |
| chr8 | 8450001  | 8550000  | 945  | 943  | 8500000  | 0.19902  | 0.006007  | 0 |
| chr8 | 11650001 | 11750000 | 953  | 917  | 11700000 | 0.251518 | 0.00076   | 0 |
| chr8 | 11700001 | 11800000 | 794  | 756  | 11750000 | 0.266716 | 0.000388  | 0 |
| chr8 | 11900001 | 12000000 | 23   | 23   | 11950000 | 0.195963 | 0.006694  | 0 |
| chr8 | 11950001 | 12050000 | 30   | 41   | 1.20E+07 | -0.2547  | 0.000755  | 0 |
| chr8 | 12000001 | 12100000 | 13   | 21   | 12050000 | -0.49591 | 7.79E-10  | 0 |
| chr8 | 12050001 | 12150000 | 3    | 2    | 12100000 | 0.780926 | 1.60E-21  | 0 |
| chr8 | 12100001 | 12200000 | 8    | 7    | 12150000 | 0.388608 | 5.52E-07  | 0 |
| chr8 | 12150001 | 12250000 | 63   | 60   | 12200000 | 0.266352 | 0.000395  | 0 |
| chr8 | 12200001 | 12300000 | 57   | 56   | 12250000 | 0.221498 | 0.002601  | 0 |
| chr8 | 12250001 | 12350000 | 4    | 4    | 12300000 | 0.195963 | 0.006694  | 0 |
| chr8 | 12300001 | 12400000 | 19   | 13   | 12350000 | 0.743451 | 7.68E-20  | 0 |
| chr8 | 12450001 | 12550000 | 85   | 80   | 12500000 | 0.283426 | 0.000179  | 0 |
| chr8 | 13700001 | 13800000 | 636  | 842  | 13750000 | -0.20883 | 0.004533  | 0 |
| chr8 | 15750001 | 15850000 | 648  | 876  | 15800000 | -0.23897 | 0.00144   | 0 |
| chr8 | 15800001 | 15900000 | 623  | 830  | 15850000 | -0.21792 | 0.00325   | 0 |
| chr8 | 16350001 | 16450000 | 683  | 891  | 16400000 | -0.18758 | 0.009461  | 0 |
| chr8 | 18550001 | 18650000 | 696  | 916  | 18600000 | -0.2003  | 0.006135  | 0 |
| chr8 | 19500001 | 19600000 | 1089 | 1079 | 19550000 | 0.209272 | 0.004137  | 0 |
| chr8 | 21900001 | 22000000 | 1269 | 1185 | 21950000 | 0.294768 | 0.000103  | 0 |
| chr8 | 21950001 | 22050000 | 1297 | 1246 | 2.20E+07 | 0.253837 | 0.000688  | 0 |
| chr8 | 22000001 | 22100000 | 1161 | 1170 | 22050000 | 0.184822 | 0.009823  | 0 |
| chr8 | 22350001 | 22450000 | 1075 | 1077 | 22400000 | 0.193281 | 0.007353  | 0 |
| chr8 | 22400001 | 22500000 | 1205 | 1213 | 22450000 | 0.186417 | 0.009308  | 0 |
| chr8 | 22550001 | 22650000 | 1202 | 1198 | 22600000 | 0.200772 | 0.005642  | 0 |
| chr8 | 23000001 | 23100000 | 890  | 879  | 23050000 | 0.213905 | 0.003479  | 0 |
| chr8 | 23100001 | 23200000 | 1085 | 1083 | 23150000 | 0.198625 | 0.006092  | 0 |
| chr8 | 23150001 | 23250000 | 1026 | 1016 | 23200000 | 0.210093 | 0.004013  | 0 |
| chr8 | 23200001 | 23300000 | 998  | 982  | 23250000 | 0.21928  | 0.002834  | 0 |
| chr8 | 23250001 | 23350000 | 1053 | 1048 | 23300000 | 0.20283  | 0.005239  | 0 |
| chr8 | 24250001 | 24350000 | 666  | 891  | 24300000 | -0.22394 | 0.00259   | 0 |
| chr8 | 24300001 | 24400000 | 679  | 925  | 24350000 | -0.25008 | 0.000916  | 0 |
| chr8 | 25800001 | 25900000 | 995  | 991  | 25850000 | 0.201775 | 0.005442  | 0 |
| chr8 | 26350001 | 26450000 | 961  | 965  | 26400000 | 0.189971 | 0.008245  | 0 |
| chr8 | 26400001 | 26500000 | 1023 | 1026 | 26450000 | 0.191738 | 0.007758  | 0 |
| chr8 | 29150001 | 29250000 | 942  | 943  | 29200000 | 0.194432 | 0.007063  | 0 |
| chr8 | 31250001 | 31350000 | 593  | 785  | 31300000 | -0.2087  | 0.004555  | 0 |
| chr8 | 31600001 | 31700000 | 595  | 816  | 31650000 | -0.25972 | 0.00061   | 0 |

|      |          |          |      |      |          |          |          |   |
|------|----------|----------|------|------|----------|----------|----------|---|
| chr8 | 31650001 | 31750000 | 551  | 742  | 31700000 | -0.2334  | 0.001796 | 0 |
| chr8 | 32150001 | 32250000 | 574  | 769  | 32200000 | -0.22597 | 0.002397 | 0 |
| chr8 | 32200001 | 32300000 | 593  | 793  | 32250000 | -0.22333 | 0.002651 | 0 |
| chr8 | 32400001 | 32500000 | 649  | 851  | 32450000 | -0.19498 | 0.007373 | 0 |
| chr8 | 32450001 | 32550000 | 645  | 854  | 32500000 | -0.20897 | 0.00451  | 0 |
| chr8 | 32500001 | 32600000 | 596  | 829  | 32550000 | -0.2801  | 0.000248 | 0 |
| chr8 | 33900001 | 34000000 | 583  | 773  | 33950000 | -0.21101 | 0.004189 | 0 |
| chr8 | 33950001 | 34050000 | 564  | 827  | 3.40E+07 | -0.35623 | 5.40E-06 | 0 |
| chr8 | 34650001 | 34750000 | 576  | 768  | 34700000 | -0.21907 | 0.003112 | 0 |
| chr8 | 34950001 | 35050000 | 585  | 763  | 3.50E+07 | -0.18728 | 0.009553 | 0 |
| chr8 | 35000001 | 35100000 | 574  | 754  | 35050000 | -0.19755 | 0.006749 | 0 |
| chr8 | 35250001 | 35350000 | 613  | 807  | 35300000 | -0.20072 | 0.006045 | 0 |
| chr8 | 35800001 | 35900000 | 509  | 664  | 35850000 | -0.18755 | 0.009468 | 0 |
| chr8 | 36650001 | 36750000 | 719  | 940  | 36700000 | -0.19071 | 0.008522 | 0 |
| chr8 | 37550001 | 37650000 | 1061 | 1068 | 37600000 | 0.186476 | 0.009289 | 0 |
| chr8 | 37600001 | 37700000 | 1068 | 1066 | 37650000 | 0.198667 | 0.006083 | 0 |
| chr8 | 37650001 | 37750000 | 1020 | 1010 | 37700000 | 0.210177 | 0.004    | 0 |
| chr8 | 38000001 | 38100000 | 856  | 826  | 38050000 | 0.247432 | 0.000906 | 0 |
| chr8 | 38200001 | 38300000 | 914  | 918  | 38250000 | 0.189663 | 0.008333 | 0 |
| chr8 | 38250001 | 38350000 | 1013 | 1007 | 38300000 | 0.204534 | 0.004924 | 0 |
| chr8 | 38750001 | 38850000 | 1011 | 1019 | 38800000 | 0.184592 | 0.009899 | 0 |
| chr8 | 40750001 | 40850000 | 689  | 912  | 40800000 | -0.20857 | 0.004576 | 0 |
| chr8 | 40800001 | 40900000 | 633  | 830  | 40850000 | -0.19494 | 0.007381 | 0 |
| chr8 | 43550001 | 43650000 | 537  | 755  | 43600000 | -0.29559 | 0.000121 | 0 |
| chr8 | 46800001 | 46900000 | 158  | 206  | 46850000 | -0.18676 | 0.009722 | 0 |
| chr8 | 47000001 | 47100000 | 673  | 887  | 47050000 | -0.20236 | 0.005706 | 0 |
| chr8 | 47300001 | 47400000 | 676  | 885  | 47350000 | -0.19269 | 0.007969 | 0 |
| chr8 | 47450001 | 47550000 | 405  | 531  | 47500000 | -0.19483 | 0.007411 | 0 |
| chr8 | 47600001 | 47700000 | 354  | 490  | 47650000 | -0.27307 | 0.000341 | 0 |
| chr8 | 47650001 | 47750000 | 428  | 589  | 47700000 | -0.26469 | 0.000492 | 0 |
| chr8 | 47700001 | 47800000 | 545  | 726  | 47750000 | -0.21775 | 0.00327  | 0 |
| chr8 | 50150001 | 50250000 | 630  | 847  | 50200000 | -0.23105 | 0.00197  | 0 |
| chr8 | 50300001 | 50400000 | 510  | 673  | 50350000 | -0.20415 | 0.005359 | 0 |
| chr8 | 51350001 | 51450000 | 525  | 685  | 51400000 | -0.18782 | 0.009384 | 0 |
| chr8 | 51800001 | 51900000 | 528  | 691  | 51850000 | -0.19218 | 0.008107 | 0 |
| chr8 | 51850001 | 51950000 | 515  | 722  | 51900000 | -0.29146 | 0.000147 | 0 |
| chr8 | 53950001 | 54050000 | 509  | 718  | 5.40E+07 | -0.30036 | 9.64E-05 | 0 |
| chr8 | 54000001 | 54100000 | 606  | 812  | 54050000 | -0.2262  | 0.002376 | 0 |
| chr8 | 55500001 | 55600000 | 563  | 760  | 55550000 | -0.2369  | 0.001564 | 0 |
| chr8 | 55600001 | 55700000 | 577  | 782  | 55650000 | -0.24263 | 0.001243 | 0 |
| chr8 | 58600001 | 58700000 | 611  | 861  | 58650000 | -0.29888 | 0.000103 | 0 |
| chr8 | 60150001 | 60250000 | 607  | 811  | 60200000 | -0.22204 | 0.002784 | 0 |
| chr8 | 60300001 | 60400000 | 541  | 724  | 60350000 | -0.2244  | 0.002545 | 0 |
| chr8 | 60350001 | 60450000 | 492  | 671  | 60400000 | -0.25169 | 0.000856 | 0 |
| chr8 | 60550001 | 60650000 | 622  | 826  | 60600000 | -0.21326 | 0.003859 | 0 |
| chr8 | 60600001 | 60700000 | 612  | 828  | 60650000 | -0.24014 | 0.001375 | 0 |
| chr8 | 60650001 | 60750000 | 605  | 790  | 60700000 | -0.18895 | 0.009037 | 0 |

|      |          |          |      |     |          |          |          |   |
|------|----------|----------|------|-----|----------|----------|----------|---|
| chr8 | 62600001 | 62700000 | 1020 | 981 | 62650000 | 0.252207 | 0.000738 | 0 |
| chr8 | 64350001 | 64450000 | 567  | 764 | 64400000 | -0.23426 | 0.001737 | 0 |
| chr8 | 65800001 | 65900000 | 548  | 719 | 65850000 | -0.19585 | 0.007155 | 0 |
| chr8 | 68100001 | 68200000 | 830  | 823 | 68150000 | 0.208182 | 0.004308 | 0 |
| chr8 | 69150001 | 69250000 | 597  | 828 | 69200000 | -0.27594 | 0.0003   | 0 |
| chr8 | 69200001 | 69300000 | 599  | 823 | 69250000 | -0.26237 | 0.000544 | 0 |
| chr8 | 69250001 | 69350000 | 534  | 727 | 69300000 | -0.24915 | 0.000952 | 0 |
| chr8 | 69300001 | 69400000 | 526  | 712 | 69350000 | -0.24085 | 0.001336 | 0 |
| chr8 | 69350001 | 69450000 | 518  | 692 | 69400000 | -0.22186 | 0.002803 | 0 |
| chr8 | 69400001 | 69500000 | 558  | 744 | 69450000 | -0.21907 | 0.003112 | 0 |
| chr8 | 69450001 | 69550000 | 549  | 745 | 69500000 | -0.24447 | 0.001154 | 0 |
| chr8 | 69500001 | 69600000 | 543  | 736 | 69550000 | -0.24279 | 0.001235 | 0 |
| chr8 | 69550001 | 69650000 | 527  | 731 | 69600000 | -0.27611 | 0.000298 | 0 |
| chr8 | 69600001 | 69700000 | 496  | 669 | 69650000 | -0.2357  | 0.001641 | 0 |
| chr8 | 69900001 | 70000000 | 512  | 684 | 69950000 | -0.22189 | 0.0028   | 0 |
| chr8 | 69950001 | 70050000 | 498  | 669 | 7.00E+07 | -0.2299  | 0.00206  | 0 |
| chr8 | 71700001 | 71800000 | 504  | 689 | 71750000 | -0.25512 | 0.000742 | 0 |
| chr8 | 74650001 | 74750000 | 844  | 848 | 74700000 | 0.189142 | 0.008483 | 0 |
| chr8 | 76350001 | 76450000 | 475  | 689 | 76400000 | -0.34061 | 1.26E-05 | 0 |
| chr8 | 76400001 | 76500000 | 512  | 688 | 76450000 | -0.2303  | 0.002028 | 0 |
| chr8 | 76700001 | 76800000 | 538  | 715 | 76750000 | -0.21437 | 0.003705 | 0 |
| chr8 | 76750001 | 76850000 | 523  | 706 | 76800000 | -0.23689 | 0.001565 | 0 |
| chr8 | 76900001 | 77000000 | 541  | 713 | 76950000 | -0.20231 | 0.005717 | 0 |
| chr8 | 76950001 | 77050000 | 523  | 719 | 7.70E+07 | -0.26322 | 0.000525 | 0 |
| chr8 | 77000001 | 77100000 | 560  | 758 | 77050000 | -0.24081 | 0.001338 | 0 |
| chr8 | 77050001 | 77150000 | 595  | 807 | 77100000 | -0.24372 | 0.00119  | 0 |
| chr8 | 77100001 | 77200000 | 596  | 788 | 77150000 | -0.20692 | 0.004855 | 0 |
| chr8 | 77300001 | 77400000 | 560  | 746 | 77350000 | -0.21779 | 0.003265 | 0 |
| chr8 | 78350001 | 78450000 | 570  | 755 | 78400000 | -0.20955 | 0.004417 | 0 |
| chr8 | 78400001 | 78500000 | 579  | 765 | 78450000 | -0.20593 | 0.005029 | 0 |
| chr8 | 78550001 | 78650000 | 579  | 773 | 78600000 | -0.22094 | 0.002901 | 0 |
| chr8 | 79300001 | 79400000 | 537  | 713 | 79350000 | -0.21302 | 0.003894 | 0 |
| chr8 | 80350001 | 80450000 | 644  | 841 | 80400000 | -0.18908 | 0.008998 | 0 |
| chr8 | 81900001 | 82000000 | 668  | 881 | 81950000 | -0.20333 | 0.005515 | 0 |
| chr8 | 82800001 | 82900000 | 609  | 800 | 82850000 | -0.19759 | 0.006739 | 0 |
| chr8 | 83400001 | 83500000 | 525  | 696 | 83450000 | -0.21081 | 0.00422  | 0 |
| chr8 | 83750001 | 83850000 | 563  | 750 | 83800000 | -0.21779 | 0.003265 | 0 |
| chr8 | 84000001 | 84100000 | 569  | 759 | 84050000 | -0.21971 | 0.003039 | 0 |
| chr8 | 84150001 | 84250000 | 503  | 676 | 84200000 | -0.2305  | 0.002012 | 0 |
| chr8 | 84200001 | 84300000 | 548  | 722 | 84250000 | -0.20186 | 0.005809 | 0 |
| chr8 | 84700001 | 84800000 | 511  | 667 | 84750000 | -0.1884  | 0.009205 | 0 |
| chr8 | 85650001 | 85750000 | 604  | 805 | 85700000 | -0.21848 | 0.003182 | 0 |
| chr8 | 85700001 | 85800000 | 547  | 773 | 85750000 | -0.30296 | 8.50E-05 | 0 |
| chr8 | 85750001 | 85850000 | 551  | 798 | 85800000 | -0.33837 | 1.42E-05 | 0 |
| chr8 | 85800001 | 85900000 | 542  | 729 | 85850000 | -0.23166 | 0.001923 | 0 |
| chr8 | 86250001 | 86350000 | 614  | 801 | 86300000 | -0.1876  | 0.009453 | 0 |
| chr8 | 86400001 | 86500000 | 596  | 794 | 86450000 | -0.21786 | 0.003256 | 0 |

|      |          |          |      |      |          |          |          |   |
|------|----------|----------|------|------|----------|----------|----------|---|
| chr8 | 86450001 | 86550000 | 578  | 782  | 86500000 | -0.24014 | 0.001375 | 0 |
| chr8 | 86500001 | 86600000 | 312  | 424  | 86550000 | -0.24656 | 0.001059 | 0 |
| chr8 | 86700001 | 86800000 | 1    | 3    | 86750000 | -1.389   | 6.26E-48 | 0 |
| chr8 | 87700001 | 87800000 | 586  | 785  | 87750000 | -0.22583 | 0.00241  | 0 |
| chr8 | 88050001 | 88150000 | 576  | 754  | 88100000 | -0.19253 | 0.008012 | 0 |
| chr8 | 88600001 | 88700000 | 465  | 618  | 88650000 | -0.21441 | 0.003699 | 0 |
| chr8 | 88750001 | 88850000 | 518  | 676  | 88800000 | -0.18811 | 0.009295 | 0 |
| chr8 | 88800001 | 88900000 | 527  | 694  | 88850000 | -0.20117 | 0.005951 | 0 |
| chr8 | 89300001 | 89400000 | 585  | 772  | 89350000 | -0.2042  | 0.005348 | 0 |
| chr8 | 89350001 | 89450000 | 547  | 735  | 89400000 | -0.23024 | 0.002033 | 0 |
| chr8 | 89500001 | 89600000 | 453  | 609  | 89550000 | -0.23097 | 0.001976 | 0 |
| chr8 | 90100001 | 90200000 | 497  | 659  | 90150000 | -0.21107 | 0.00418  | 0 |
| chr8 | 90150001 | 90250000 | 463  | 646  | 90200000 | -0.28456 | 0.000203 | 0 |
| chr8 | 90200001 | 90300000 | 537  | 724  | 90250000 | -0.2351  | 0.00168  | 0 |
| chr8 | 90350001 | 90450000 | 522  | 700  | 90400000 | -0.22734 | 0.002274 | 0 |
| chr8 | 92200001 | 92300000 | 598  | 786  | 92250000 | -0.19842 | 0.006549 | 0 |
| chr8 | 92650001 | 92750000 | 539  | 723  | 92700000 | -0.22775 | 0.002239 | 0 |
| chr8 | 93150001 | 93250000 | 531  | 724  | 93200000 | -0.25131 | 0.00087  | 0 |
| chr8 | 93200001 | 93300000 | 515  | 690  | 93250000 | -0.22606 | 0.002389 | 0 |
| chr8 | 93250001 | 93350000 | 535  | 712  | 93300000 | -0.21638 | 0.003441 | 0 |
| chr8 | 93850001 | 93950000 | 615  | 829  | 93900000 | -0.23482 | 0.001699 | 0 |
| chr8 | 94100001 | 94200000 | 643  | 838  | 94150000 | -0.18617 | 0.009912 | 0 |
| chr8 | 94450001 | 94550000 | 613  | 799  | 94500000 | -0.18635 | 0.009855 | 0 |
| chr8 | 94500001 | 94600000 | 668  | 890  | 94550000 | -0.21799 | 0.00324  | 0 |
| chr8 | 94550001 | 94650000 | 665  | 907  | 94600000 | -0.25179 | 0.000853 | 0 |
| chr8 | 95900001 | 96000000 | 973  | 956  | 95950000 | 0.221392 | 0.002612 | 0 |
| chr8 | 96750001 | 96850000 | 630  | 821  | 96800000 | -0.18607 | 0.009946 | 0 |
| chr8 | 97200001 | 97300000 | 930  | 936  | 97250000 | 0.186685 | 0.009224 | 0 |
| chr8 | 99450001 | 99550000 | 684  | 906  | 99500000 | -0.20955 | 0.004417 | 0 |
| chr8 | 1.02E+08 | 1.02E+08 | 852  | 847  | 1.02E+08 | 0.204454 | 0.004939 | 0 |
| chr8 | 1.02E+08 | 1.02E+08 | 859  | 864  | 1.02E+08 | 0.18759  | 0.008945 | 0 |
| chr8 | 1.04E+08 | 1.04E+08 | 1069 | 1027 | 1.04E+08 | 0.253789 | 0.000689 | 0 |
| chr8 | 1.04E+08 | 1.04E+08 | 984  | 948  | 1.04E+08 | 0.249734 | 0.000821 | 0 |
| chr8 | 1.04E+08 | 1.04E+08 | 900  | 852  | 1.04E+08 | 0.275035 | 0.000265 | 0 |
| chr8 | 1.04E+08 | 1.04E+08 | 887  | 850  | 1.04E+08 | 0.257434 | 0.000588 | 0 |
| chr8 | 1.07E+08 | 1.07E+08 | 638  | 833  | 1.07E+08 | -0.1888  | 0.009084 | 0 |
| chr8 | 1.07E+08 | 1.07E+08 | 635  | 860  | 1.07E+08 | -0.24162 | 0.001295 | 0 |
| chr8 | 1.07E+08 | 1.07E+08 | 666  | 888  | 1.07E+08 | -0.21907 | 0.003112 | 0 |
| chr8 | 1.08E+08 | 1.08E+08 | 641  | 852  | 1.08E+08 | -0.21457 | 0.003679 | 0 |
| chr8 | 1.09E+08 | 1.09E+08 | 582  | 772  | 1.09E+08 | -0.21162 | 0.004098 | 0 |
| chr8 | 1.09E+08 | 1.09E+08 | 607  | 797  | 1.09E+08 | -0.19692 | 0.006897 | 0 |
| chr8 | 1.09E+08 | 1.1E+08  | 745  | 738  | 1.1E+08  | 0.209583 | 0.00409  | 0 |
| chr8 | 1.1E+08  | 1.1E+08  | 635  | 835  | 1.1E+08  | -0.19906 | 0.006406 | 0 |
| chr8 | 1.1E+08  | 1.1E+08  | 658  | 887  | 1.1E+08  | -0.23488 | 0.001695 | 0 |
| chr8 | 1.1E+08  | 1.1E+08  | 695  | 922  | 1.1E+08  | -0.21179 | 0.004072 | 0 |
| chr8 | 1.11E+08 | 1.11E+08 | 600  | 797  | 1.11E+08 | -0.21365 | 0.003804 | 0 |
| chr8 | 1.11E+08 | 1.11E+08 | 563  | 750  | 1.11E+08 | -0.21779 | 0.003265 | 0 |

|      |          |          |      |      |          |          |          |   |
|------|----------|----------|------|------|----------|----------|----------|---|
| chr8 | 1.12E+08 | 1.12E+08 | 548  | 744  | 1.12E+08 | -0.24516 | 0.001121 | 0 |
| chr8 | 1.12E+08 | 1.12E+08 | 562  | 744  | 1.12E+08 | -0.20877 | 0.004543 | 0 |
| chr8 | 1.12E+08 | 1.12E+08 | 495  | 666  | 1.12E+08 | -0.23213 | 0.001888 | 0 |
| chr8 | 1.12E+08 | 1.12E+08 | 558  | 772  | 1.12E+08 | -0.27237 | 0.000351 | 0 |
| chr8 | 1.12E+08 | 1.12E+08 | 583  | 781  | 1.12E+08 | -0.22586 | 0.002407 | 0 |
| chr8 | 1.12E+08 | 1.12E+08 | 570  | 755  | 1.12E+08 | -0.20955 | 0.004417 | 0 |
| chr8 | 1.13E+08 | 1.13E+08 | 514  | 681  | 1.13E+08 | -0.20992 | 0.004358 | 0 |
| chr8 | 1.13E+08 | 1.13E+08 | 536  | 700  | 1.13E+08 | -0.18916 | 0.008975 | 0 |
| chr8 | 1.13E+08 | 1.13E+08 | 539  | 733  | 1.13E+08 | -0.24756 | 0.001016 | 0 |
| chr8 | 1.13E+08 | 1.13E+08 | 547  | 785  | 1.13E+08 | -0.32519 | 2.81E-05 | 0 |
| chr8 | 1.13E+08 | 1.13E+08 | 524  | 744  | 1.13E+08 | -0.30977 | 6.10E-05 | 0 |
| chr8 | 1.13E+08 | 1.13E+08 | 495  | 687  | 1.13E+08 | -0.27692 | 0.000287 | 0 |
| chr8 | 1.13E+08 | 1.13E+08 | 524  | 691  | 1.13E+08 | -0.20316 | 0.00555  | 0 |
| chr8 | 1.13E+08 | 1.13E+08 | 573  | 767  | 1.13E+08 | -0.22473 | 0.002514 | 0 |
| chr8 | 1.13E+08 | 1.13E+08 | 569  | 746  | 1.13E+08 | -0.19478 | 0.007422 | 0 |
| chr8 | 1.14E+08 | 1.14E+08 | 559  | 731  | 1.14E+08 | -0.19106 | 0.008421 | 0 |
| chr8 | 1.14E+08 | 1.14E+08 | 513  | 734  | 1.14E+08 | -0.32086 | 3.50E-05 | 0 |
| chr8 | 1.14E+08 | 1.14E+08 | 531  | 754  | 1.14E+08 | -0.30989 | 6.06E-05 | 0 |
| chr8 | 1.14E+08 | 1.14E+08 | 611  | 818  | 1.14E+08 | -0.22497 | 0.002491 | 0 |
| chr8 | 1.14E+08 | 1.14E+08 | 626  | 816  | 1.14E+08 | -0.18644 | 0.009823 | 0 |
| chr8 | 1.14E+08 | 1.14E+08 | 601  | 803  | 1.14E+08 | -0.22207 | 0.00278  | 0 |
| chr8 | 1.14E+08 | 1.14E+08 | 549  | 741  | 1.14E+08 | -0.2367  | 0.001577 | 0 |
| chr8 | 1.14E+08 | 1.14E+08 | 517  | 680  | 1.14E+08 | -0.19941 | 0.006328 | 0 |
| chr8 | 1.15E+08 | 1.15E+08 | 530  | 704  | 1.15E+08 | -0.21362 | 0.003809 | 0 |
| chr8 | 1.15E+08 | 1.15E+08 | 565  | 765  | 1.15E+08 | -0.24125 | 0.001315 | 0 |
| chr8 | 1.15E+08 | 1.16E+08 | 569  | 780  | 1.15E+08 | -0.25908 | 0.000627 | 0 |
| chr8 | 1.16E+08 | 1.16E+08 | 552  | 730  | 1.16E+08 | -0.20727 | 0.004795 | 0 |
| chr8 | 1.16E+08 | 1.16E+08 | 550  | 764  | 1.16E+08 | -0.27818 | 0.000271 | 0 |
| chr8 | 1.16E+08 | 1.16E+08 | 577  | 758  | 1.16E+08 | -0.19766 | 0.006723 | 0 |
| chr8 | 1.16E+08 | 1.16E+08 | 605  | 789  | 1.16E+08 | -0.18713 | 0.009603 | 0 |
| chr8 | 1.17E+08 | 1.17E+08 | 652  | 851  | 1.17E+08 | -0.18832 | 0.009229 | 0 |
| chr8 | 1.21E+08 | 1.21E+08 | 828  | 817  | 1.21E+08 | 0.215258 | 0.003305 | 0 |
| chr8 | 1.21E+08 | 1.21E+08 | 809  | 790  | 1.21E+08 | 0.23025  | 0.001841 | 0 |
| chr8 | 1.22E+08 | 1.22E+08 | 655  | 858  | 1.22E+08 | -0.19352 | 0.007748 | 0 |
| chr8 | 1.23E+08 | 1.23E+08 | 617  | 806  | 1.23E+08 | -0.18955 | 0.00886  | 0 |
| chr8 | 1.24E+08 | 1.24E+08 | 924  | 913  | 1.24E+08 | 0.213241 | 0.003567 | 0 |
| chr8 | 1.24E+08 | 1.25E+08 | 895  | 844  | 1.24E+08 | 0.280608 | 0.000204 | 0 |
| chr8 | 1.25E+08 | 1.26E+08 | 853  | 838  | 1.25E+08 | 0.221559 | 0.002595 | 0 |
| chr8 | 1.25E+08 | 1.26E+08 | 921  | 909  | 1.26E+08 | 0.214884 | 0.003352 | 0 |
| chr8 | 1.26E+08 | 1.26E+08 | 1004 | 942  | 1.26E+08 | 0.287923 | 0.000144 | 0 |
| chr8 | 1.26E+08 | 1.27E+08 | 1024 | 1026 | 1.26E+08 | 0.193148 | 0.007387 | 0 |
| chr8 | 1.27E+08 | 1.27E+08 | 1070 | 1045 | 1.27E+08 | 0.230071 | 0.001855 | 0 |
| chr8 | 1.32E+08 | 1.33E+08 | 834  | 1102 | 1.33E+08 | -0.20604 | 0.00501  | 0 |
| chr8 | 1.33E+08 | 1.33E+08 | 766  | 1006 | 1.33E+08 | -0.19725 | 0.006819 | 0 |
| chr8 | 1.33E+08 | 1.34E+08 | 961  | 1269 | 1.34E+08 | -0.20512 | 0.005177 | 0 |
| chr8 | 1.34E+08 | 1.34E+08 | 1511 | 1499 | 1.34E+08 | 0.207466 | 0.004423 | 0 |
| chr8 | 1.35E+08 | 1.35E+08 | 825  | 1101 | 1.35E+08 | -0.22039 | 0.002963 | 0 |

|      |          |          |      |      |          |          |          |   |
|------|----------|----------|------|------|----------|----------|----------|---|
| chr8 | 1.35E+08 | 1.35E+08 | 871  | 1206 | 1.35E+08 | -0.27352 | 0.000334 | 0 |
| chr8 | 1.36E+08 | 1.36E+08 | 900  | 1174 | 1.36E+08 | -0.18747 | 0.009494 | 0 |
| chr8 | 1.37E+08 | 1.37E+08 | 757  | 1001 | 1.37E+08 | -0.20711 | 0.004821 | 0 |
| chr8 | 1.38E+08 | 1.38E+08 | 807  | 1101 | 1.38E+08 | -0.25221 | 0.000838 | 0 |
| chr8 | 1.38E+08 | 1.38E+08 | 538  | 725  | 1.38E+08 | -0.23441 | 0.001727 | 0 |
| chr8 | 1.38E+08 | 1.38E+08 | 691  | 936  | 1.38E+08 | -0.24186 | 0.001282 | 0 |
| chr8 | 1.38E+08 | 1.38E+08 | 734  | 967  | 1.38E+08 | -0.20177 | 0.005826 | 0 |
| chr8 | 1.38E+08 | 1.38E+08 | 725  | 1012 | 1.38E+08 | -0.28519 | 0.000197 | 0 |
| chr8 | 1.38E+08 | 1.38E+08 | 705  | 969  | 1.38E+08 | -0.26291 | 0.000532 | 0 |
| chr8 | 1.38E+08 | 1.38E+08 | 798  | 1062 | 1.38E+08 | -0.21636 | 0.003443 | 0 |
| chr8 | 1.39E+08 | 1.39E+08 | 748  | 1008 | 1.39E+08 | -0.23442 | 0.001726 | 0 |
| chr8 | 1.39E+08 | 1.39E+08 | 751  | 1031 | 1.39E+08 | -0.2612  | 0.000573 | 0 |
| chr8 | 1.39E+08 | 1.4E+08  | 814  | 1100 | 1.4E+08  | -0.23844 | 0.001471 | 0 |
| chr8 | 1.41E+08 | 1.42E+08 | 1249 | 1148 | 1.42E+08 | 0.317614 | 3.23E-05 | 0 |
| chr8 | 1.42E+08 | 1.42E+08 | 1410 | 1342 | 1.42E+08 | 0.267274 | 0.000379 | 0 |
| chr8 | 1.42E+08 | 1.42E+08 | 1411 | 1385 | 1.42E+08 | 0.222795 | 0.002473 | 0 |
| chr8 | 1.42E+08 | 1.42E+08 | 1687 | 1682 | 1.42E+08 | 0.200245 | 0.005749 | 0 |
| chr8 | 1.42E+08 | 1.42E+08 | 1855 | 1716 | 1.42E+08 | 0.308333 | 5.23E-05 | 0 |
| chr8 | 1.43E+08 | 1.43E+08 | 1631 | 1566 | 1.43E+08 | 0.254636 | 0.000664 | 0 |
| chr8 | 1.43E+08 | 1.43E+08 | 1599 | 1559 | 1.43E+08 | 0.232512 | 0.001681 | 0 |
| chr8 | 1.43E+08 | 1.43E+08 | 1603 | 1614 | 1.43E+08 | 0.186097 | 0.009409 | 0 |
| chr8 | 1.43E+08 | 1.43E+08 | 787  | 792  | 1.43E+08 | 0.186826 | 0.00918  | 0 |
| chr8 | 1.43E+08 | 1.43E+08 | 1427 | 1412 | 1.43E+08 | 0.211208 | 0.003849 | 0 |
| chr8 | 1.43E+08 | 1.43E+08 | 1482 | 1462 | 1.43E+08 | 0.215565 | 0.003267 | 0 |
| chr8 | 1.43E+08 | 1.44E+08 | 1654 | 1660 | 1.44E+08 | 0.190739 | 0.00803  | 0 |
| chr8 | 1.44E+08 | 1.44E+08 | 1730 | 1744 | 1.44E+08 | 0.184335 | 0.009985 | 0 |
| chr8 | 1.44E+08 | 1.44E+08 | 1666 | 1660 | 1.44E+08 | 0.201168 | 0.005562 | 0 |
| chr8 | 1.44E+08 | 1.44E+08 | 1492 | 1422 | 1.44E+08 | 0.265289 | 0.000414 | 0 |
| chr8 | 1.44E+08 | 1.44E+08 | 1479 | 1450 | 1.44E+08 | 0.224532 | 0.00231  | 0 |
| chr8 | 1.44E+08 | 1.44E+08 | 1289 | 1296 | 1.44E+08 | 0.18815  | 0.008776 | 0 |
| chr8 | 1.44E+08 | 1.44E+08 | 1487 | 1491 | 1.44E+08 | 0.192087 | 0.007664 | 0 |
| chr8 | 1.44E+08 | 1.44E+08 | 1495 | 1452 | 1.44E+08 | 0.238067 | 0.00134  | 0 |
| chr8 | 1.44E+08 | 1.44E+08 | 1483 | 1426 | 1.44E+08 | 0.252508 | 0.000728 | 0 |
| chr8 | 1.44E+08 | 1.45E+08 | 1657 | 1563 | 1.44E+08 | 0.280219 | 0.000208 | 0 |
| chr8 | 1.44E+08 | 1.45E+08 | 1752 | 1631 | 1.45E+08 | 0.299209 | 8.28E-05 | 0 |
| chr8 | 1.45E+08 | 1.45E+08 | 1707 | 1608 | 1.45E+08 | 0.282159 | 0.00019  | 0 |
| chr8 | 1.45E+08 | 1.45E+08 | 1726 | 1557 | 1.45E+08 | 0.344627 | 7.45E-06 | 0 |
| chr8 | 1.45E+08 | 1.45E+08 | 1745 | 1533 | 1.45E+08 | 0.382832 | 7.89E-07 | 0 |
| chr8 | 1.45E+08 | 1.45E+08 | 1471 | 1418 | 1.45E+08 | 0.248903 | 0.000851 | 0 |
| chr8 | 1.45E+08 | 1.45E+08 | 1281 | 1269 | 1.45E+08 | 0.209541 | 0.004096 | 0 |
| chr8 | 1.45E+08 | 1.45E+08 | 1445 | 1355 | 1.45E+08 | 0.28874  | 0.000139 | 0 |
| chr8 | 1.45E+08 | 1.45E+08 | 1541 | 1526 | 1.45E+08 | 0.210075 | 0.004016 | 0 |
| chr8 | 1.45E+08 | 1.45E+08 | 1631 | 1575 | 1.45E+08 | 0.246368 | 0.000947 | 0 |
| chr8 | 1.45E+08 | 1.45E+08 | 1668 | 1567 | 1.45E+08 | 0.286077 | 0.000157 | 0 |
| chr8 | 1.45E+08 | 1.45E+08 | 1703 | 1619 | 1.45E+08 | 0.268938 | 0.000351 | 0 |
| chr8 | 1.45E+08 | 1.45E+08 | 1655 | 1531 | 1.45E+08 | 0.30832  | 5.23E-05 | 0 |
| chr8 | 1.45E+08 | 1.45E+08 | 1497 | 1413 | 1.45E+08 | 0.279276 | 0.000218 | 0 |

|      |          |          |      |      |          |          |           |   |
|------|----------|----------|------|------|----------|----------|-----------|---|
| chr8 | 1.45E+08 | 1.45E+08 | 1329 | 1311 | 1.45E+08 | 0.215636 | 0.003258  | 0 |
| chr8 | 1.45E+08 | 1.46E+08 | 0    | 4    | 1.45E+08 | #NAME?   | 3.67E-137 | 0 |
| chr8 | 1.45E+08 | 1.46E+08 | 813  | 768  | 1.46E+08 | 0.278112 | 0.00023   | 0 |
| chr8 | 1.46E+08 | 1.46E+08 | 1580 | 1473 | 1.46E+08 | 0.29713  | 9.19E-05  | 0 |
| chr8 | 1.46E+08 | 1.46E+08 | 1453 | 1418 | 1.46E+08 | 0.23114  | 0.001777  | 0 |
| chr8 | 1.46E+08 | 1.46E+08 | 1575 | 1481 | 1.46E+08 | 0.284743 | 0.000168  | 0 |
| chr8 | 1.46E+08 | 1.46E+08 | 1710 | 1575 | 1.46E+08 | 0.314608 | 3.78E-05  | 0 |
| chr8 | 1.46E+08 | 1.46E+08 | 1490 | 1400 | 1.46E+08 | 0.285849 | 0.000159  | 0 |
| chr8 | 1.46E+08 | 1.46E+08 | 1294 | 1260 | 1.46E+08 | 0.234377 | 0.001559  | 0 |
| chr8 | 1.46E+08 | 1.46E+08 | 1260 | 1241 | 1.46E+08 | 0.217884 | 0.00299   | 0 |
| chr8 | 1.46E+08 | 1.46E+08 | 1015 | 1014 | 1.46E+08 | 0.197385 | 0.006366  | 0 |
| chr8 | 1.46E+08 | 1.46E+08 | 6    | 11   | 1.46E+08 | -0.67851 | 3.57E-16  | 0 |
| chr8 | 1000001  | 1100000  | 858  | 887  | 1050000  | 0.148007 | 0.030812  | 0 |
| chr8 | 1300001  | 1400000  | 738  | 747  | 1350000  | 0.178476 | 0.012126  | 0 |
| chr8 | 2850001  | 2950000  | 639  | 817  | 2900000  | -0.15856 | 0.023446  | 0 |
| chr8 | 3000001  | 3100000  | 623  | 790  | 3050000  | -0.14666 | 0.032936  | 0 |
| chr8 | 3650001  | 3750000  | 654  | 832  | 3700000  | -0.15133 | 0.028886  | 0 |
| chr8 | 3950001  | 4050000  | 623  | 787  | 4.00E+06 | -0.14117 | 0.038284  | 0 |
| chr8 | 4300001  | 4400000  | 630  | 797  | 4350000  | -0.14326 | 0.036163  | 0 |
| chr8 | 4450001  | 4550000  | 641  | 819  | 4500000  | -0.15758 | 0.02413   | 0 |
| chr8 | 4600001  | 4700000  | 645  | 832  | 4650000  | -0.17132 | 0.015948  | 0 |
| chr8 | 5000001  | 5100000  | 599  | 756  | 5050000  | -0.13987 | 0.039651  | 0 |
| chr8 | 5200001  | 5300000  | 624  | 790  | 5250000  | -0.14434 | 0.03511   | 0 |
| chr8 | 5250001  | 5350000  | 591  | 745  | 5300000  | -0.13812 | 0.04155   | 0 |
| chr8 | 5400001  | 5500000  | 700  | 890  | 5450000  | -0.15049 | 0.029584  | 0 |
| chr8 | 5550001  | 5650000  | 637  | 819  | 5600000  | -0.16661 | 0.018434  | 0 |
| chr8 | 5700001  | 5800000  | 641  | 826  | 5750000  | -0.16985 | 0.016688  | 0 |
| chr8 | 5750001  | 5850000  | 653  | 843  | 5800000  | -0.17249 | 0.01538   | 0 |
| chr8 | 5850001  | 5950000  | 669  | 857  | 5900000  | -0.16133 | 0.021606  | 0 |
| chr8 | 8050001  | 8150000  | 566  | 572  | 8100000  | 0.18075  | 0.011251  | 0 |
| chr8 | 9600001  | 9700000  | 732  | 756  | 9650000  | 0.14942  | 0.029591  | 0 |
| chr8 | 9700001  | 9800000  | 721  | 915  | 9750000  | -0.14781 | 0.031896  | 0 |
| chr8 | 10050001 | 10150000 | 749  | 941  | 10100000 | -0.13327 | 0.047214  | 0 |
| chr8 | 11150001 | 11250000 | 905  | 926  | 11200000 | 0.162869 | 0.01987   | 0 |
| chr8 | 11200001 | 11300000 | 883  | 915  | 11250000 | 0.144605 | 0.03392   | 0 |
| chr8 | 11250001 | 11350000 | 967  | 998  | 11300000 | 0.150439 | 0.028737  | 0 |
| chr8 | 11550001 | 11650000 | 1057 | 1077 | 11600000 | 0.16892  | 0.016474  | 0 |
| chr8 | 12350001 | 12450000 | 223  | 229  | 12400000 | 0.157659 | 0.023254  | 0 |
| chr8 | 12400001 | 12500000 | 230  | 240  | 12450000 | 0.134562 | 0.044628  | 0 |
| chr8 | 13000001 | 13100000 | 767  | 786  | 13050000 | 0.16066  | 0.02125   | 0 |
| chr8 | 13750001 | 13850000 | 648  | 832  | 13800000 | -0.16463 | 0.019573  | 0 |
| chr8 | 13800001 | 13900000 | 616  | 792  | 13850000 | -0.16661 | 0.018434  | 0 |
| chr8 | 13850001 | 13950000 | 594  | 753  | 13900000 | -0.14622 | 0.033335  | 0 |
| chr8 | 14400001 | 14500000 | 611  | 772  | 14450000 | -0.14147 | 0.037977  | 0 |
| chr8 | 15100001 | 15200000 | 680  | 860  | 15150000 | -0.14284 | 0.036586  | 0 |
| chr8 | 15250001 | 15350000 | 621  | 787  | 15300000 | -0.14581 | 0.033721  | 0 |
| chr8 | 15550001 | 15650000 | 664  | 833  | 15600000 | -0.13117 | 0.049845  | 0 |



|      |          |          |      |      |          |          |          |   |
|------|----------|----------|------|------|----------|----------|----------|---|
| chr8 | 15650001 | 15750000 | 666  | 843  | 15700000 | -0.14405 | 0.035396 | 0 |
| chr8 | 16100001 | 16200000 | 635  | 820  | 16150000 | -0.1729  | 0.015181 | 0 |
| chr8 | 16300001 | 16400000 | 695  | 883  | 16350000 | -0.14944 | 0.030473 | 0 |
| chr8 | 16600001 | 16700000 | 647  | 827  | 16650000 | -0.15816 | 0.023722 | 0 |
| chr8 | 16650001 | 16750000 | 666  | 836  | 16700000 | -0.13202 | 0.048767 | 0 |
| chr8 | 17750001 | 17850000 | 894  | 909  | 17800000 | 0.171958 | 0.014966 | 0 |
| chr8 | 17900001 | 18000000 | 768  | 973  | 17950000 | -0.14537 | 0.034131 | 0 |
| chr8 | 19450001 | 19550000 | 1020 | 1062 | 19500000 | 0.137748 | 0.040969 | 0 |
| chr8 | 19550001 | 19650000 | 1043 | 1062 | 19600000 | 0.169918 | 0.015964 | 0 |
| chr8 | 19600001 | 19700000 | 969  | 1013 | 19650000 | 0.131897 | 0.047887 | 0 |
| chr8 | 21750001 | 21850000 | 1029 | 1073 | 21800000 | 0.135556 | 0.04346  | 0 |
| chr8 | 21850001 | 21950000 | 1052 | 1068 | 21900000 | 0.174186 | 0.013936 | 0 |
| chr8 | 22200001 | 22300000 | 886  | 922  | 22250000 | 0.138503 | 0.040139 | 0 |
| chr8 | 22450001 | 22550000 | 1170 | 1215 | 22500000 | 0.141515 | 0.036962 | 0 |
| chr8 | 22500001 | 22600000 | 1190 | 1230 | 22550000 | 0.148266 | 0.030585 | 0 |
| chr8 | 23050001 | 23150000 | 937  | 956  | 23100000 | 0.167001 | 0.017492 | 0 |
| chr8 | 23300001 | 23400000 | 1023 | 1037 | 23350000 | 0.176353 | 0.012994 | 0 |
| chr8 | 23350001 | 23450000 | 1002 | 1040 | 23400000 | 0.142262 | 0.036207 | 0 |
| chr8 | 23500001 | 23600000 | 924  | 934  | 23550000 | 0.180433 | 0.01137  | 0 |
| chr8 | 24350001 | 24450000 | 667  | 867  | 24400000 | -0.18238 | 0.011222 | 0 |
| chr8 | 24400001 | 24500000 | 642  | 816  | 24450000 | -0.15003 | 0.029966 | 0 |
| chr8 | 24600001 | 24700000 | 735  | 930  | 24650000 | -0.14352 | 0.035908 | 0 |
| chr8 | 25050001 | 25150000 | 950  | 969  | 25100000 | 0.167394 | 0.01728  | 0 |
| chr8 | 25200001 | 25300000 | 933  | 965  | 25250000 | 0.147311 | 0.031427 | 0 |
| chr8 | 25500001 | 25600000 | 669  | 841  | 25550000 | -0.13414 | 0.046155 | 0 |
| chr8 | 26300001 | 26400000 | 930  | 970  | 26350000 | 0.135209 | 0.043865 | 0 |
| chr8 | 26650001 | 26750000 | 796  | 1000 | 26700000 | -0.1332  | 0.047299 | 0 |
| chr8 | 27400001 | 27500000 | 1041 | 1081 | 27450000 | 0.141567 | 0.036909 | 0 |
| chr8 | 27700001 | 27800000 | 1032 | 1075 | 27750000 | 0.137069 | 0.041728 | 0 |
| chr8 | 29100001 | 29200000 | 888  | 912  | 29150000 | 0.157489 | 0.023373 | 0 |
| chr8 | 29350001 | 29450000 | 968  | 1000 | 29400000 | 0.149042 | 0.029914 | 0 |
| chr8 | 29400001 | 29500000 | 978  | 1010 | 29450000 | 0.149514 | 0.029512 | 0 |
| chr8 | 30500001 | 30600000 | 775  | 793  | 30550000 | 0.162838 | 0.019888 | 0 |
| chr8 | 31100001 | 31200000 | 645  | 812  | 31150000 | -0.13622 | 0.0437   | 0 |
| chr8 | 31200001 | 31300000 | 703  | 884  | 31250000 | -0.13456 | 0.045648 | 0 |
| chr8 | 31950001 | 32050000 | 621  | 788  | 3.20E+07 | -0.14764 | 0.032048 | 0 |
| chr8 | 32000001 | 32100000 | 593  | 768  | 32050000 | -0.17711 | 0.013295 | 0 |
| chr8 | 32100001 | 32200000 | 582  | 753  | 32150000 | -0.17567 | 0.013918 | 0 |
| chr8 | 32250001 | 32350000 | 613  | 781  | 32300000 | -0.15347 | 0.027173 | 0 |
| chr8 | 32350001 | 32450000 | 630  | 798  | 32400000 | -0.14507 | 0.034411 | 0 |
| chr8 | 32550001 | 32650000 | 616  | 777  | 32600000 | -0.13902 | 0.040561 | 0 |
| chr8 | 34350001 | 34450000 | 556  | 705  | 34400000 | -0.14658 | 0.033011 | 0 |
| chr8 | 34400001 | 34500000 | 578  | 727  | 34450000 | -0.13492 | 0.045214 | 0 |
| chr8 | 34700001 | 34800000 | 582  | 745  | 34750000 | -0.16026 | 0.0223   | 0 |
| chr8 | 34900001 | 35000000 | 627  | 797  | 34950000 | -0.15015 | 0.029866 | 0 |
| chr8 | 35050001 | 35150000 | 579  | 754  | 35100000 | -0.18504 | 0.010289 | 0 |
| chr8 | 35400001 | 35500000 | 553  | 706  | 35450000 | -0.15643 | 0.024952 | 0 |

|      |          |          |      |      |          |          |          |   |
|------|----------|----------|------|------|----------|----------|----------|---|
| chr8 | 35650001 | 35750000 | 597  | 749  | 35700000 | -0.13127 | 0.049715 | 0 |
| chr8 | 36050001 | 36150000 | 555  | 698  | 36100000 | -0.13478 | 0.045388 | 0 |
| chr8 | 36100001 | 36200000 | 601  | 765  | 36150000 | -0.15213 | 0.028235 | 0 |
| chr8 | 36350001 | 36450000 | 720  | 915  | 36400000 | -0.14981 | 0.030154 | 0 |
| chr8 | 36600001 | 36700000 | 719  | 915  | 36650000 | -0.15182 | 0.028489 | 0 |
| chr8 | 37700001 | 37800000 | 903  | 929  | 37750000 | 0.15501  | 0.025153 | 0 |
| chr8 | 37950001 | 38050000 | 873  | 881  | 3.80E+07 | 0.182803 | 0.01051  | 0 |
| chr8 | 38050001 | 38150000 | 837  | 858  | 38100000 | 0.160213 | 0.021539 | 0 |
| chr8 | 38700001 | 38800000 | 921  | 929  | 38750000 | 0.183486 | 0.010273 | 0 |
| chr8 | 38800001 | 38900000 | 953  | 981  | 38850000 | 0.154186 | 0.02577  | 0 |
| chr8 | 38950001 | 39050000 | 689  | 877  | 3.90E+07 | -0.15211 | 0.028252 | 0 |
| chr8 | 39150001 | 39250000 | 752  | 956  | 39200000 | -0.15031 | 0.029728 | 0 |
| chr8 | 39300001 | 39400000 | 671  | 861  | 39350000 | -0.16374 | 0.020104 | 0 |
| chr8 | 39650001 | 39750000 | 622  | 793  | 39700000 | -0.15444 | 0.026425 | 0 |
| chr8 | 39950001 | 40050000 | 950  | 992  | 4.00E+07 | 0.13355  | 0.045844 | 0 |
| chr8 | 40000001 | 40100000 | 1003 | 1033 | 40050000 | 0.153444 | 0.026336 | 0 |
| chr8 | 40150001 | 40250000 | 879  | 919  | 40200000 | 0.131761 | 0.048059 | 0 |
| chr8 | 41150001 | 41250000 | 727  | 912  | 41200000 | -0.13112 | 0.049915 | 0 |
| chr8 | 41200001 | 41300000 | 721  | 907  | 41250000 | -0.13514 | 0.044957 | 0 |
| chr8 | 42150001 | 42250000 | 891  | 921  | 42200000 | 0.148187 | 0.030653 | 0 |
| chr8 | 42450001 | 42550000 | 672  | 844  | 42500000 | -0.13282 | 0.047766 | 0 |
| chr8 | 42900001 | 43000000 | 841  | 869  | 42950000 | 0.148713 | 0.030197 | 0 |
| chr8 | 42950001 | 43050000 | 756  | 774  | 4.30E+07 | 0.162016 | 0.020394 | 0 |
| chr8 | 43200001 | 43300000 | 453  | 574  | 43250000 | -0.14558 | 0.033937 | 0 |
| chr8 | 43500001 | 43600000 | 532  | 680  | 43550000 | -0.15815 | 0.023731 | 0 |
| chr8 | 43600001 | 43700000 | 609  | 766  | 43650000 | -0.13494 | 0.045195 | 0 |
| chr8 | 46750001 | 46850000 | 31   | 39   | 46800000 | -0.13524 | 0.044836 | 0 |
| chr8 | 46850001 | 46950000 | 439  | 558  | 46900000 | -0.15008 | 0.029925 | 0 |
| chr8 | 47050001 | 47150000 | 703  | 897  | 47100000 | -0.15562 | 0.025542 | 0 |
| chr8 | 47500001 | 47600000 | 472  | 595  | 47550000 | -0.13814 | 0.041527 | 0 |
| chr8 | 47550001 | 47650000 | 429  | 543  | 47600000 | -0.14401 | 0.035431 | 0 |
| chr8 | 48800001 | 48900000 | 881  | 897  | 48850000 | 0.169997 | 0.015925 | 0 |
| chr8 | 48850001 | 48950000 | 818  | 826  | 48900000 | 0.181922 | 0.010823 | 0 |
| chr8 | 49000001 | 49100000 | 725  | 924  | 49050000 | -0.15395 | 0.026804 | 0 |
| chr8 | 49050001 | 49150000 | 644  | 835  | 49100000 | -0.17875 | 0.012616 | 0 |
| chr8 | 49100001 | 49200000 | 640  | 803  | 49150000 | -0.13137 | 0.049596 | 0 |
| chr8 | 49300001 | 49400000 | 704  | 914  | 49350000 | -0.18066 | 0.011867 | 0 |
| chr8 | 49500001 | 49600000 | 850  | 1067 | 49550000 | -0.13206 | 0.048711 | 0 |
| chr8 | 49650001 | 49750000 | 761  | 960  | 49700000 | -0.13917 | 0.040394 | 0 |
| chr8 | 50100001 | 50200000 | 633  | 817  | 50150000 | -0.17217 | 0.015534 | 0 |
| chr8 | 50200001 | 50300000 | 668  | 841  | 50250000 | -0.13629 | 0.043611 | 0 |
| chr8 | 50250001 | 50350000 | 560  | 710  | 50300000 | -0.14643 | 0.033145 | 0 |
| chr8 | 50350001 | 50450000 | 564  | 732  | 50400000 | -0.18019 | 0.012049 | 0 |
| chr8 | 50400001 | 50500000 | 605  | 781  | 50450000 | -0.17242 | 0.01541  | 0 |
| chr8 | 50450001 | 50550000 | 664  | 840  | 50500000 | -0.14324 | 0.036184 | 0 |
| chr8 | 50500001 | 50600000 | 583  | 735  | 50550000 | -0.13829 | 0.041367 | 0 |
| chr8 | 50550001 | 50650000 | 555  | 707  | 50600000 | -0.15326 | 0.027339 | 0 |

|      |          |          |      |      |          |          |          |   |
|------|----------|----------|------|------|----------|----------|----------|---|
| chr8 | 51000001 | 51100000 | 685  | 714  | 51050000 | 0.136143 | 0.042781 | 0 |
| chr8 | 51050001 | 51150000 | 671  | 678  | 51100000 | 0.180991 | 0.011162 | 0 |
| chr8 | 51300001 | 51400000 | 623  | 783  | 51350000 | -0.13382 | 0.046541 | 0 |
| chr8 | 51500001 | 51600000 | 587  | 755  | 51550000 | -0.16715 | 0.01813  | 0 |
| chr8 | 51550001 | 51650000 | 567  | 726  | 51600000 | -0.16066 | 0.022038 | 0 |
| chr8 | 51600001 | 51700000 | 538  | 679  | 51650000 | -0.13984 | 0.039677 | 0 |
| chr8 | 51750001 | 51850000 | 559  | 728  | 51800000 | -0.18513 | 0.010258 | 0 |
| chr8 | 52300001 | 52400000 | 606  | 766  | 52350000 | -0.14206 | 0.037366 | 0 |
| chr8 | 52600001 | 52700000 | 622  | 789  | 52650000 | -0.14715 | 0.03249  | 0 |
| chr8 | 53200001 | 53300000 | 662  | 852  | 53250000 | -0.16806 | 0.017635 | 0 |
| chr8 | 53250001 | 53350000 | 702  | 902  | 53300000 | -0.16569 | 0.018952 | 0 |
| chr8 | 53600001 | 53700000 | 799  | 828  | 53650000 | 0.144528 | 0.033993 | 0 |
| chr8 | 53700001 | 53800000 | 779  | 796  | 53750000 | 0.164818 | 0.018716 | 0 |
| chr8 | 53800001 | 53900000 | 660  | 854  | 53850000 | -0.17581 | 0.013856 | 0 |
| chr8 | 53900001 | 54000000 | 562  | 716  | 53950000 | -0.15343 | 0.027209 | 0 |
| chr8 | 54150001 | 54250000 | 701  | 887  | 54200000 | -0.14356 | 0.035875 | 0 |
| chr8 | 54650001 | 54750000 | 690  | 871  | 54700000 | -0.14011 | 0.039389 | 0 |
| chr8 | 54850001 | 54950000 | 768  | 800  | 54900000 | 0.137069 | 0.041728 | 0 |
| chr8 | 54900001 | 55000000 | 737  | 759  | 54950000 | 0.153528 | 0.026272 | 0 |
| chr8 | 55200001 | 55300000 | 718  | 920  | 55250000 | -0.16169 | 0.021375 | 0 |
| chr8 | 55550001 | 55650000 | 565  | 733  | 55600000 | -0.1796  | 0.012278 | 0 |
| chr8 | 55800001 | 55900000 | 607  | 774  | 55850000 | -0.15467 | 0.02625  | 0 |
| chr8 | 57300001 | 57400000 | 638  | 820  | 57350000 | -0.1661  | 0.018717 | 0 |
| chr8 | 57350001 | 57450000 | 698  | 890  | 57400000 | -0.15462 | 0.026295 | 0 |
| chr8 | 57400001 | 57500000 | 687  | 875  | 57450000 | -0.15301 | 0.027535 | 0 |
| chr8 | 58650001 | 58750000 | 651  | 840  | 58700000 | -0.17177 | 0.015728 | 0 |
| chr8 | 59400001 | 59500000 | 783  | 816  | 59450000 | 0.136406 | 0.04248  | 0 |
| chr8 | 59950001 | 60050000 | 701  | 888  | 6.00E+07 | -0.14518 | 0.034309 | 0 |
| chr8 | 60000001 | 60100000 | 636  | 818  | 60050000 | -0.16711 | 0.018153 | 0 |
| chr8 | 60200001 | 60300000 | 601  | 758  | 60250000 | -0.13887 | 0.040726 | 0 |
| chr8 | 60250001 | 60350000 | 599  | 778  | 60300000 | -0.18125 | 0.011641 | 0 |
| chr8 | 60500001 | 60600000 | 646  | 826  | 60550000 | -0.15864 | 0.023386 | 0 |
| chr8 | 60700001 | 60800000 | 559  | 703  | 60750000 | -0.13471 | 0.045463 | 0 |
| chr8 | 60950001 | 61050000 | 649  | 844  | 6.10E+07 | -0.18306 | 0.010976 | 0 |
| chr8 | 61000001 | 61100000 | 604  | 772  | 61050000 | -0.15809 | 0.02377  | 0 |
| chr8 | 62550001 | 62650000 | 1025 | 1034 | 62600000 | 0.183351 | 0.010319 | 0 |
| chr8 | 63250001 | 63350000 | 710  | 905  | 63300000 | -0.15414 | 0.02666  | 0 |
| chr8 | 63350001 | 63450000 | 720  | 914  | 63400000 | -0.14823 | 0.03152  | 0 |
| chr8 | 63400001 | 63500000 | 661  | 854  | 63450000 | -0.17362 | 0.014843 | 0 |
| chr8 | 63500001 | 63600000 | 714  | 906  | 63550000 | -0.14762 | 0.032062 | 0 |
| chr8 | 63900001 | 64000000 | 782  | 813  | 63950000 | 0.139876 | 0.038664 | 0 |
| chr8 | 64300001 | 64400000 | 650  | 844  | 64350000 | -0.18084 | 0.011797 | 0 |
| chr8 | 64800001 | 64900000 | 612  | 780  | 64850000 | -0.15398 | 0.02678  | 0 |
| chr8 | 65000001 | 65100000 | 548  | 695  | 65050000 | -0.14687 | 0.032738 | 0 |
| chr8 | 65600001 | 65700000 | 635  | 801  | 65650000 | -0.13908 | 0.040494 | 0 |
| chr8 | 65850001 | 65950000 | 604  | 758  | 65900000 | -0.13169 | 0.049187 | 0 |
| chr8 | 66450001 | 66550000 | 758  | 788  | 66500000 | 0.139965 | 0.03857  | 0 |

|      |          |          |     |     |          |          |          |   |
|------|----------|----------|-----|-----|----------|----------|----------|---|
| chr8 | 66500001 | 66600000 | 742 | 754 | 66550000 | 0.172818 | 0.014561 | 0 |
| chr8 | 67900001 | 68000000 | 836 | 869 | 67950000 | 0.14011  | 0.038418 | 0 |
| chr8 | 67950001 | 68050000 | 850 | 869 | 6.80E+07 | 0.16407  | 0.019152 | 0 |
| chr8 | 68050001 | 68150000 | 808 | 819 | 68100000 | 0.176455 | 0.012951 | 0 |
| chr8 | 68700001 | 68800000 | 650 | 830 | 68750000 | -0.15671 | 0.024748 | 0 |
| chr8 | 70450001 | 70550000 | 617 | 775 | 70500000 | -0.13296 | 0.047588 | 0 |
| chr8 | 70650001 | 70750000 | 606 | 771 | 70700000 | -0.15145 | 0.028788 | 0 |
| chr8 | 71000001 | 71100000 | 788 | 822 | 71050000 | 0.13502  | 0.044087 | 0 |
| chr8 | 71850001 | 71950000 | 608 | 769 | 71900000 | -0.14295 | 0.036476 | 0 |
| chr8 | 71900001 | 72000000 | 675 | 865 | 71950000 | -0.16185 | 0.021272 | 0 |
| chr8 | 72400001 | 72500000 | 626 | 805 | 72450000 | -0.16686 | 0.018291 | 0 |
| chr8 | 73050001 | 73150000 | 616 | 787 | 73100000 | -0.15747 | 0.024204 | 0 |
| chr8 | 73100001 | 73200000 | 647 | 813 | 73150000 | -0.13353 | 0.046895 | 0 |
| chr8 | 73700001 | 73800000 | 647 | 821 | 73750000 | -0.14765 | 0.032035 | 0 |
| chr8 | 74100001 | 74200000 | 665 | 840 | 74150000 | -0.14107 | 0.038384 | 0 |
| chr8 | 74600001 | 74700000 | 823 | 860 | 74650000 | 0.132519 | 0.047111 | 0 |
| chr8 | 75450001 | 75550000 | 555 | 697 | 75500000 | -0.13271 | 0.047904 | 0 |
| chr8 | 76050001 | 76150000 | 538 | 700 | 76100000 | -0.18379 | 0.01072  | 0 |
| chr8 | 76200001 | 76300000 | 497 | 627 | 76250000 | -0.13926 | 0.040306 | 0 |
| chr8 | 76450001 | 76550000 | 502 | 642 | 76500000 | -0.15892 | 0.023196 | 0 |
| chr8 | 77150001 | 77250000 | 543 | 682 | 77200000 | -0.13286 | 0.047719 | 0 |
| chr8 | 77350001 | 77450000 | 580 | 738 | 77400000 | -0.1516  | 0.028661 | 0 |
| chr8 | 78100001 | 78200000 | 565 | 710 | 78150000 | -0.13361 | 0.046799 | 0 |
| chr8 | 78150001 | 78250000 | 558 | 727 | 78200000 | -0.18573 | 0.010058 | 0 |
| chr8 | 78200001 | 78300000 | 513 | 651 | 78250000 | -0.14774 | 0.031962 | 0 |
| chr8 | 78300001 | 78400000 | 573 | 739 | 78350000 | -0.17108 | 0.01607  | 0 |
| chr8 | 78600001 | 78700000 | 584 | 749 | 78650000 | -0.16303 | 0.020532 | 0 |
| chr8 | 78950001 | 79050000 | 607 | 770 | 7.90E+07 | -0.1472  | 0.032444 | 0 |
| chr8 | 79850001 | 79950000 | 620 | 802 | 79900000 | -0.17537 | 0.014049 | 0 |
| chr8 | 80000001 | 80100000 | 575 | 734 | 80050000 | -0.15626 | 0.025076 | 0 |
| chr8 | 80150001 | 80250000 | 649 | 815 | 80200000 | -0.13262 | 0.048015 | 0 |
| chr8 | 80300001 | 80400000 | 685 | 876 | 80350000 | -0.15886 | 0.023236 | 0 |
| chr8 | 80650001 | 80750000 | 883 | 909 | 80700000 | 0.154096 | 0.025839 | 0 |
| chr8 | 81350001 | 81450000 | 782 | 812 | 81400000 | 0.141652 | 0.036823 | 0 |
| chr8 | 81850001 | 81950000 | 692 | 885 | 81900000 | -0.15894 | 0.023183 | 0 |
| chr8 | 82050001 | 82150000 | 604 | 787 | 82100000 | -0.18585 | 0.010017 | 0 |
| chr8 | 82100001 | 82200000 | 655 | 844 | 82150000 | -0.16979 | 0.016724 | 0 |
| chr8 | 82850001 | 82950000 | 633 | 817 | 82900000 | -0.17217 | 0.015534 | 0 |
| chr8 | 82900001 | 83000000 | 643 | 835 | 82950000 | -0.18099 | 0.011738 | 0 |
| chr8 | 83350001 | 83450000 | 543 | 707 | 83400000 | -0.18479 | 0.010371 | 0 |
| chr8 | 83800001 | 83900000 | 544 | 697 | 83850000 | -0.16159 | 0.021437 | 0 |
| chr8 | 83900001 | 84000000 | 571 | 725 | 83950000 | -0.14853 | 0.031262 | 0 |
| chr8 | 83950001 | 84050000 | 574 | 741 | 8.40E+07 | -0.17246 | 0.015393 | 0 |
| chr8 | 84050001 | 84150000 | 572 | 739 | 84100000 | -0.1736  | 0.014855 | 0 |
| chr8 | 84100001 | 84200000 | 528 | 677 | 84150000 | -0.16265 | 0.020767 | 0 |
| chr8 | 84500001 | 84600000 | 511 | 661 | 84550000 | -0.17536 | 0.014052 | 0 |
| chr8 | 84550001 | 84650000 | 539 | 699 | 84600000 | -0.17904 | 0.012499 | 0 |

|      |          |          |      |      |          |          |          |   |
|------|----------|----------|------|------|----------|----------|----------|---|
| chr8 | 84750001 | 84850000 | 496  | 629  | 84800000 | -0.14676 | 0.032845 | 0 |
| chr8 | 84900001 | 85000000 | 517  | 656  | 84950000 | -0.14757 | 0.032111 | 0 |
| chr8 | 84950001 | 85050000 | 515  | 670  | 8.50E+07 | -0.18363 | 0.010776 | 0 |
| chr8 | 85400001 | 85500000 | 565  | 734  | 85450000 | -0.18157 | 0.011523 | 0 |
| chr8 | 85850001 | 85950000 | 469  | 597  | 85900000 | -0.15218 | 0.028196 | 0 |
| chr8 | 86050001 | 86150000 | 729  | 737  | 86100000 | 0.180217 | 0.011451 | 0 |
| chr8 | 86150001 | 86250000 | 643  | 829  | 86200000 | -0.17059 | 0.016313 | 0 |
| chr8 | 86200001 | 86300000 | 610  | 792  | 86250000 | -0.18073 | 0.01184  | 0 |
| chr8 | 86750001 | 86850000 | 68   | 88   | 86800000 | -0.17601 | 0.013769 | 0 |
| chr8 | 86950001 | 87050000 | 667  | 838  | 8.70E+07 | -0.1333  | 0.047172 | 0 |
| chr8 | 87900001 | 88000000 | 548  | 695  | 87950000 | -0.14687 | 0.032738 | 0 |
| chr8 | 87950001 | 88050000 | 531  | 680  | 8.80E+07 | -0.16086 | 0.021907 | 0 |
| chr8 | 88000001 | 88100000 | 582  | 753  | 88050000 | -0.17567 | 0.013918 | 0 |
| chr8 | 88300001 | 88400000 | 463  | 595  | 88350000 | -0.16591 | 0.018826 | 0 |
| chr8 | 88650001 | 88750000 | 530  | 684  | 88700000 | -0.17204 | 0.015595 | 0 |
| chr8 | 89050001 | 89150000 | 590  | 765  | 89100000 | -0.17878 | 0.012604 | 0 |
| chr8 | 89200001 | 89300000 | 596  | 763  | 89250000 | -0.16041 | 0.022202 | 0 |
| chr8 | 90300001 | 90400000 | 537  | 685  | 90350000 | -0.15522 | 0.025841 | 0 |
| chr8 | 90800001 | 90900000 | 685  | 888  | 90850000 | -0.17849 | 0.012722 | 0 |
| chr8 | 91400001 | 91500000 | 582  | 734  | 91450000 | -0.1388  | 0.040804 | 0 |
| chr8 | 91450001 | 91550000 | 628  | 811  | 91500000 | -0.17297 | 0.015147 | 0 |
| chr8 | 91500001 | 91600000 | 672  | 863  | 91550000 | -0.16494 | 0.019391 | 0 |
| chr8 | 91550001 | 91650000 | 691  | 888  | 91600000 | -0.16591 | 0.018828 | 0 |
| chr8 | 91750001 | 91850000 | 660  | 846  | 91800000 | -0.16223 | 0.021033 | 0 |
| chr8 | 92250001 | 92350000 | 673  | 850  | 92300000 | -0.14089 | 0.03857  | 0 |
| chr8 | 92700001 | 92800000 | 571  | 723  | 92750000 | -0.14454 | 0.034919 | 0 |
| chr8 | 92750001 | 92850000 | 550  | 704  | 92800000 | -0.16018 | 0.022351 | 0 |
| chr8 | 93100001 | 93200000 | 636  | 800  | 93150000 | -0.13501 | 0.045111 | 0 |
| chr8 | 93300001 | 93400000 | 476  | 602  | 93350000 | -0.14284 | 0.036586 | 0 |
| chr8 | 93600001 | 93700000 | 648  | 823  | 93650000 | -0.14894 | 0.030906 | 0 |
| chr8 | 93800001 | 93900000 | 638  | 816  | 93850000 | -0.15905 | 0.02311  | 0 |
| chr8 | 93900001 | 94000000 | 644  | 820  | 93950000 | -0.1526  | 0.02786  | 0 |
| chr8 | 94000001 | 94100000 | 678  | 691  | 94050000 | 0.168563 | 0.01666  | 0 |
| chr8 | 94300001 | 94400000 | 708  | 899  | 94350000 | -0.14861 | 0.031191 | 0 |
| chr8 | 94950001 | 95050000 | 648  | 843  | 9.50E+07 | -0.18358 | 0.010794 | 0 |
| chr8 | 95000001 | 95100000 | 729  | 948  | 95050000 | -0.18301 | 0.010996 | 0 |
| chr8 | 95850001 | 95950000 | 903  | 941  | 95900000 | 0.136494 | 0.042379 | 0 |
| chr8 | 95950001 | 96050000 | 973  | 1016 | 9.60E+07 | 0.133574 | 0.045815 | 0 |
| chr8 | 96700001 | 96800000 | 687  | 876  | 96750000 | -0.15466 | 0.026263 | 0 |
| chr8 | 96900001 | 97000000 | 669  | 858  | 96950000 | -0.16301 | 0.020548 | 0 |
| chr8 | 97250001 | 97350000 | 907  | 944  | 97300000 | 0.138279 | 0.040385 | 0 |
| chr8 | 97650001 | 97750000 | 713  | 906  | 97700000 | -0.14965 | 0.030295 | 0 |
| chr8 | 97700001 | 97800000 | 607  | 785  | 97750000 | -0.17503 | 0.014199 | 0 |
| chr8 | 98650001 | 98750000 | 814  | 823  | 98700000 | 0.180099 | 0.011496 | 0 |
| chr8 | 98700001 | 98800000 | 742  | 754  | 98750000 | 0.172818 | 0.014561 | 0 |
| chr8 | 1.02E+08 | 1.02E+08 | 1011 | 1030 | 1.02E+08 | 0.169102 | 0.01638  | 0 |
| chr8 | 1.03E+08 | 1.03E+08 | 868  | 898  | 1.03E+08 | 0.146943 | 0.031757 | 0 |

|      |          |          |     |     |          |          |          |   |
|------|----------|----------|-----|-----|----------|----------|----------|---|
| chr8 | 1.03E+08 | 1.03E+08 | 861 | 869 | 1.03E+08 | 0.18262  | 0.010574 | 0 |
| chr8 | 1.04E+08 | 1.05E+08 | 733 | 924 | 1.05E+08 | -0.13812 | 0.041553 | 0 |
| chr8 | 1.05E+08 | 1.05E+08 | 689 | 877 | 1.05E+08 | -0.15211 | 0.028252 | 0 |
| chr8 | 1.05E+08 | 1.05E+08 | 600 | 756 | 1.05E+08 | -0.13746 | 0.042285 | 0 |
| chr8 | 1.05E+08 | 1.05E+08 | 534 | 692 | 1.05E+08 | -0.17797 | 0.012936 | 0 |
| chr8 | 1.06E+08 | 1.06E+08 | 668 | 838 | 1.06E+08 | -0.13114 | 0.049885 | 0 |
| chr8 | 1.06E+08 | 1.06E+08 | 630 | 820 | 1.06E+08 | -0.18431 | 0.010538 | 0 |
| chr8 | 1.06E+08 | 1.06E+08 | 657 | 831 | 1.06E+08 | -0.14299 | 0.036433 | 0 |
| chr8 | 1.06E+08 | 1.06E+08 | 650 | 826 | 1.06E+08 | -0.14974 | 0.030215 | 0 |
| chr8 | 1.06E+08 | 1.06E+08 | 595 | 769 | 1.06E+08 | -0.17413 | 0.014608 | 0 |
| chr8 | 1.06E+08 | 1.06E+08 | 600 | 763 | 1.06E+08 | -0.15076 | 0.029359 | 0 |
| chr8 | 1.06E+08 | 1.06E+08 | 611 | 767 | 1.06E+08 | -0.13209 | 0.048675 | 0 |
| chr8 | 1.06E+08 | 1.06E+08 | 586 | 758 | 1.06E+08 | -0.17533 | 0.014065 | 0 |
| chr8 | 1.06E+08 | 1.07E+08 | 652 | 819 | 1.07E+08 | -0.13303 | 0.047506 | 0 |
| chr8 | 1.07E+08 | 1.07E+08 | 648 | 818 | 1.07E+08 | -0.14014 | 0.039357 | 0 |
| chr8 | 1.08E+08 | 1.08E+08 | 645 | 833 | 1.08E+08 | -0.17305 | 0.01511  | 0 |
| chr8 | 1.08E+08 | 1.08E+08 | 646 | 812 | 1.08E+08 | -0.13398 | 0.046341 | 0 |
| chr8 | 1.08E+08 | 1.08E+08 | 653 | 831 | 1.08E+08 | -0.1518  | 0.028501 | 0 |
| chr8 | 1.09E+08 | 1.09E+08 | 608 | 768 | 1.09E+08 | -0.14107 | 0.038384 | 0 |
| chr8 | 1.09E+08 | 1.09E+08 | 672 | 858 | 1.09E+08 | -0.15655 | 0.02486  | 0 |
| chr8 | 1.09E+08 | 1.09E+08 | 679 | 872 | 1.09E+08 | -0.16495 | 0.019381 | 0 |
| chr8 | 1.1E+08  | 1.1E+08  | 707 | 724 | 1.1E+08  | 0.161684 | 0.020601 | 0 |
| chr8 | 1.1E+08  | 1.1E+08  | 682 | 872 | 1.1E+08  | -0.15859 | 0.023421 | 0 |
| chr8 | 1.1E+08  | 1.1E+08  | 636 | 801 | 1.1E+08  | -0.13681 | 0.043018 | 0 |
| chr8 | 1.11E+08 | 1.11E+08 | 568 | 724 | 1.11E+08 | -0.15414 | 0.02666  | 0 |
| chr8 | 1.11E+08 | 1.11E+08 | 556 | 710 | 1.11E+08 | -0.15677 | 0.024703 | 0 |
| chr8 | 1.11E+08 | 1.12E+08 | 581 | 747 | 1.12E+08 | -0.16661 | 0.018434 | 0 |
| chr8 | 1.12E+08 | 1.12E+08 | 585 | 750 | 1.12E+08 | -0.16249 | 0.020869 | 0 |
| chr8 | 1.12E+08 | 1.12E+08 | 522 | 665 | 1.12E+08 | -0.15334 | 0.027275 | 0 |
| chr8 | 1.12E+08 | 1.13E+08 | 562 | 719 | 1.13E+08 | -0.15946 | 0.022833 | 0 |
| chr8 | 1.13E+08 | 1.13E+08 | 544 | 691 | 1.13E+08 | -0.14912 | 0.03075  | 0 |
| chr8 | 1.13E+08 | 1.13E+08 | 576 | 737 | 1.13E+08 | -0.15963 | 0.022716 | 0 |
| chr8 | 1.14E+08 | 1.14E+08 | 531 | 676 | 1.14E+08 | -0.15235 | 0.028061 | 0 |
| chr8 | 1.14E+08 | 1.14E+08 | 570 | 734 | 1.14E+08 | -0.16886 | 0.01721  | 0 |
| chr8 | 1.14E+08 | 1.14E+08 | 591 | 754 | 1.14E+08 | -0.15544 | 0.025673 | 0 |
| chr8 | 1.14E+08 | 1.14E+08 | 562 | 708 | 1.14E+08 | -0.13722 | 0.04256  | 0 |
| chr8 | 1.14E+08 | 1.14E+08 | 585 | 751 | 1.14E+08 | -0.16441 | 0.019699 | 0 |
| chr8 | 1.15E+08 | 1.15E+08 | 493 | 628 | 1.15E+08 | -0.15321 | 0.027375 | 0 |
| chr8 | 1.15E+08 | 1.15E+08 | 530 | 681 | 1.15E+08 | -0.1657  | 0.018949 | 0 |
| chr8 | 1.15E+08 | 1.15E+08 | 577 | 726 | 1.15E+08 | -0.13544 | 0.04461  | 0 |
| chr8 | 1.15E+08 | 1.15E+08 | 578 | 740 | 1.15E+08 | -0.16049 | 0.022146 | 0 |
| chr8 | 1.15E+08 | 1.15E+08 | 539 | 698 | 1.15E+08 | -0.17698 | 0.013351 | 0 |
| chr8 | 1.15E+08 | 1.15E+08 | 553 | 695 | 1.15E+08 | -0.13377 | 0.046598 | 0 |
| chr8 | 1.15E+08 | 1.15E+08 | 543 | 682 | 1.15E+08 | -0.13286 | 0.047719 | 0 |
| chr8 | 1.15E+08 | 1.15E+08 | 526 | 661 | 1.15E+08 | -0.13362 | 0.046775 | 0 |
| chr8 | 1.15E+08 | 1.15E+08 | 491 | 636 | 1.15E+08 | -0.17734 | 0.013198 | 0 |
| chr8 | 1.15E+08 | 1.15E+08 | 517 | 661 | 1.15E+08 | -0.15852 | 0.02347  | 0 |

|      |          |          |      |      |          |          |          |   |
|------|----------|----------|------|------|----------|----------|----------|---|
| chr8 | 1.15E+08 | 1.15E+08 | 591  | 743  | 1.15E+08 | -0.13424 | 0.046029 | 0 |
| chr8 | 1.15E+08 | 1.16E+08 | 571  | 720  | 1.16E+08 | -0.13854 | 0.041083 | 0 |
| chr8 | 1.16E+08 | 1.16E+08 | 542  | 695  | 1.16E+08 | -0.16276 | 0.020703 | 0 |
| chr8 | 1.16E+08 | 1.16E+08 | 539  | 694  | 1.16E+08 | -0.16869 | 0.017299 | 0 |
| chr8 | 1.16E+08 | 1.16E+08 | 649  | 834  | 1.16E+08 | -0.16587 | 0.018853 | 0 |
| chr8 | 1.16E+08 | 1.16E+08 | 611  | 786  | 1.16E+08 | -0.16739 | 0.017997 | 0 |
| chr8 | 1.17E+08 | 1.17E+08 | 668  | 838  | 1.17E+08 | -0.13114 | 0.049885 | 0 |
| chr8 | 1.17E+08 | 1.17E+08 | 646  | 815  | 1.17E+08 | -0.1393  | 0.040256 | 0 |
| chr8 | 1.17E+08 | 1.17E+08 | 648  | 829  | 1.17E+08 | -0.15942 | 0.022862 | 0 |
| chr8 | 1.17E+08 | 1.17E+08 | 678  | 854  | 1.17E+08 | -0.13699 | 0.042818 | 0 |
| chr8 | 1.17E+08 | 1.18E+08 | 702  | 906  | 1.17E+08 | -0.17208 | 0.015577 | 0 |
| chr8 | 1.18E+08 | 1.18E+08 | 805  | 1048 | 1.18E+08 | -0.18461 | 0.010432 | 0 |
| chr8 | 1.18E+08 | 1.19E+08 | 661  | 851  | 1.18E+08 | -0.16855 | 0.017374 | 0 |
| chr8 | 1.19E+08 | 1.19E+08 | 727  | 938  | 1.19E+08 | -0.17167 | 0.015776 | 0 |
| chr8 | 1.19E+08 | 1.19E+08 | 761  | 955  | 1.19E+08 | -0.13164 | 0.049244 | 0 |
| chr8 | 1.22E+08 | 1.22E+08 | 716  | 908  | 1.22E+08 | -0.14677 | 0.032833 | 0 |
| chr8 | 1.23E+08 | 1.23E+08 | 885  | 918  | 1.23E+08 | 0.143146 | 0.035329 | 0 |
| chr8 | 1.23E+08 | 1.23E+08 | 875  | 893  | 1.23E+08 | 0.166586 | 0.01772  | 0 |
| chr8 | 1.24E+08 | 1.24E+08 | 754  | 963  | 1.24E+08 | -0.15701 | 0.024533 | 0 |
| chr8 | 1.24E+08 | 1.24E+08 | 987  | 1023 | 1.24E+08 | 0.144279 | 0.03423  | 0 |
| chr8 | 1.24E+08 | 1.24E+08 | 934  | 975  | 1.24E+08 | 0.133983 | 0.045321 | 0 |
| chr8 | 1.24E+08 | 1.24E+08 | 848  | 869  | 1.24E+08 | 0.160671 | 0.021243 | 0 |
| chr8 | 1.24E+08 | 1.24E+08 | 825  | 839  | 1.24E+08 | 0.171686 | 0.015095 | 0 |
| chr8 | 1.24E+08 | 1.25E+08 | 915  | 947  | 1.25E+08 | 0.14637  | 0.032276 | 0 |
| chr8 | 1.25E+08 | 1.25E+08 | 1013 | 1044 | 1.25E+08 | 0.152475 | 0.027091 | 0 |
| chr8 | 1.26E+08 | 1.26E+08 | 776  | 974  | 1.26E+08 | -0.1319  | 0.048913 | 0 |
| chr8 | 1.26E+08 | 1.26E+08 | 761  | 955  | 1.26E+08 | -0.13164 | 0.049244 | 0 |
| chr8 | 1.27E+08 | 1.27E+08 | 803  | 1031 | 1.27E+08 | -0.16461 | 0.019583 | 0 |
| chr8 | 1.27E+08 | 1.27E+08 | 793  | 998  | 1.27E+08 | -0.13576 | 0.044235 | 0 |
| chr8 | 1.28E+08 | 1.28E+08 | 2210 | 2304 | 1.28E+08 | 0.135869 | 0.043097 | 0 |
| chr8 | 1.29E+08 | 1.29E+08 | 1615 | 1671 | 1.29E+08 | 0.146785 | 0.031899 | 0 |
| chr8 | 1.29E+08 | 1.3E+08  | 963  | 1211 | 1.3E+08  | -0.13463 | 0.045565 | 0 |
| chr8 | 1.3E+08  | 1.3E+08  | 749  | 958  | 1.3E+08  | -0.1591  | 0.023077 | 0 |
| chr8 | 1.3E+08  | 1.3E+08  | 935  | 1195 | 1.3E+08  | -0.15801 | 0.023826 | 0 |
| chr8 | 1.3E+08  | 1.3E+08  | 937  | 1198 | 1.3E+08  | -0.15854 | 0.023455 | 0 |
| chr8 | 1.31E+08 | 1.31E+08 | 961  | 1212 | 1.31E+08 | -0.13882 | 0.040782 | 0 |
| chr8 | 1.31E+08 | 1.31E+08 | 990  | 1277 | 1.31E+08 | -0.1713  | 0.015961 | 0 |
| chr8 | 1.31E+08 | 1.31E+08 | 989  | 1267 | 1.31E+08 | -0.16141 | 0.021551 | 0 |
| chr8 | 1.31E+08 | 1.31E+08 | 1201 | 1253 | 1.31E+08 | 0.134813 | 0.044331 | 0 |
| chr8 | 1.32E+08 | 1.32E+08 | 933  | 1176 | 1.32E+08 | -0.13798 | 0.041709 | 0 |
| chr8 | 1.32E+08 | 1.32E+08 | 954  | 1211 | 1.32E+08 | -0.14817 | 0.031572 | 0 |
| chr8 | 1.32E+08 | 1.32E+08 | 821  | 1056 | 1.32E+08 | -0.16719 | 0.018108 | 0 |
| chr8 | 1.32E+08 | 1.32E+08 | 724  | 916  | 1.32E+08 | -0.14339 | 0.036035 | 0 |
| chr8 | 1.33E+08 | 1.33E+08 | 810  | 1019 | 1.33E+08 | -0.1352  | 0.04489  | 0 |
| chr8 | 1.33E+08 | 1.33E+08 | 811  | 1034 | 1.33E+08 | -0.1545  | 0.026383 | 0 |
| chr8 | 1.33E+08 | 1.34E+08 | 1002 | 1292 | 1.33E+08 | -0.17076 | 0.016228 | 0 |
| chr8 | 1.34E+08 | 1.34E+08 | 1191 | 1225 | 1.34E+08 | 0.155355 | 0.024899 | 0 |

|      |          |          |      |      |          |          |          |   |
|------|----------|----------|------|------|----------|----------|----------|---|
| chr8 | 1.34E+08 | 1.34E+08 | 1517 | 1571 | 1.34E+08 | 0.145501 | 0.033077 | 0 |
| chr8 | 1.34E+08 | 1.34E+08 | 1458 | 1512 | 1.34E+08 | 0.143496 | 0.034987 | 0 |
| chr8 | 1.35E+08 | 1.35E+08 | 1298 | 1356 | 1.35E+08 | 0.132896 | 0.046644 | 0 |
| chr8 | 1.35E+08 | 1.35E+08 | 986  | 1239 | 1.35E+08 | -0.13355 | 0.046862 | 0 |
| chr8 | 1.35E+08 | 1.35E+08 | 886  | 1114 | 1.35E+08 | -0.13441 | 0.045829 | 0 |
| chr8 | 1.35E+08 | 1.35E+08 | 963  | 1211 | 1.35E+08 | -0.13463 | 0.045565 | 0 |
| chr8 | 1.35E+08 | 1.36E+08 | 1003 | 1296 | 1.35E+08 | -0.17378 | 0.01477  | 0 |
| chr8 | 1.36E+08 | 1.36E+08 | 948  | 1210 | 1.36E+08 | -0.15609 | 0.0252   | 0 |
| chr8 | 1.36E+08 | 1.36E+08 | 852  | 1094 | 1.36E+08 | -0.16472 | 0.019515 | 0 |
| chr8 | 1.36E+08 | 1.36E+08 | 846  | 1068 | 1.36E+08 | -0.14022 | 0.039277 | 0 |
| chr8 | 1.37E+08 | 1.37E+08 | 874  | 1103 | 1.37E+08 | -0.13976 | 0.039761 | 0 |
| chr8 | 1.38E+08 | 1.38E+08 | 761  | 984  | 1.38E+08 | -0.1748  | 0.014304 | 0 |
| chr8 | 1.38E+08 | 1.38E+08 | 640  | 819  | 1.38E+08 | -0.15983 | 0.022585 | 0 |
| chr8 | 1.38E+08 | 1.38E+08 | 657  | 841  | 1.38E+08 | -0.16025 | 0.022306 | 0 |
| chr8 | 1.38E+08 | 1.39E+08 | 795  | 1001 | 1.38E+08 | -0.13645 | 0.04343  | 0 |
| chr8 | 1.39E+08 | 1.39E+08 | 687  | 894  | 1.39E+08 | -0.184   | 0.010644 | 0 |
| chr8 | 1.39E+08 | 1.39E+08 | 744  | 935  | 1.39E+08 | -0.1337  | 0.046683 | 0 |
| chr8 | 1.39E+08 | 1.39E+08 | 861  | 1082 | 1.39E+08 | -0.13365 | 0.046741 | 0 |
| chr8 | 1.39E+08 | 1.39E+08 | 837  | 1071 | 1.39E+08 | -0.1597  | 0.022674 | 0 |
| chr8 | 1.39E+08 | 1.39E+08 | 805  | 1025 | 1.39E+08 | -0.1526  | 0.02786  | 0 |
| chr8 | 1.4E+08  | 1.4E+08  | 996  | 1259 | 1.4E+08  | -0.1421  | 0.037332 | 0 |
| chr8 | 1.4E+08  | 1.4E+08  | 899  | 1132 | 1.4E+08  | -0.13652 | 0.043354 | 0 |
| chr8 | 1.41E+08 | 1.42E+08 | 1185 | 1239 | 1.41E+08 | 0.131674 | 0.048169 | 0 |
| chr8 | 1.42E+08 | 1.42E+08 | 1409 | 1452 | 1.42E+08 | 0.152593 | 0.026999 | 0 |
| chr8 | 1.42E+08 | 1.42E+08 | 1403 | 1447 | 1.42E+08 | 0.151413 | 0.02794  | 0 |
| chr8 | 1.42E+08 | 1.42E+08 | 1489 | 1532 | 1.42E+08 | 0.15489  | 0.025242 | 0 |
| chr8 | 1.42E+08 | 1.42E+08 | 1570 | 1599 | 1.42E+08 | 0.169558 | 0.016147 | 0 |
| chr8 | 1.42E+08 | 1.43E+08 | 1603 | 1657 | 1.42E+08 | 0.148164 | 0.030674 | 0 |
| chr8 | 1.43E+08 | 1.43E+08 | 1652 | 1668 | 1.43E+08 | 0.182057 | 0.010774 | 0 |
| chr8 | 1.43E+08 | 1.43E+08 | 339  | 430  | 1.43E+08 | -0.14709 | 0.032544 | 0 |
| chr8 | 1.44E+08 | 1.44E+08 | 1722 | 1764 | 1.44E+08 | 0.161198 | 0.020907 | 0 |
| chr8 | 1.44E+08 | 1.44E+08 | 1664 | 1740 | 1.44E+08 | 0.131531 | 0.04835  | 0 |
| chr8 | 1.44E+08 | 1.44E+08 | 1241 | 1279 | 1.44E+08 | 0.15245  | 0.027112 | 0 |
| chr8 | 1.45E+08 | 1.45E+08 | 1089 | 1139 | 1.45E+08 | 0.131199 | 0.048772 | 0 |
| chr8 | 1.46E+08 | 1.46E+08 | 1349 | 1369 | 1.46E+08 | 0.174731 | 0.013694 | 0 |
| chr8 | 1.46E+08 | 1.46E+08 | 1192 | 1240 | 1.46E+08 | 0.139007 | 0.039593 | 0 |
| chr8 | 1.46E+08 | 1.46E+08 | 1192 | 1222 | 1.46E+08 | 0.160103 | 0.021611 | 0 |
| chr8 | 1.46E+08 | 1.46E+08 | 1057 | 1094 | 1.46E+08 | 0.146326 | 0.032317 | 0 |
| chr8 | 1.46E+08 | 1.46E+08 | 499  | 510  | 1.46E+08 | 0.164506 | 0.018897 | 0 |
| chr9 | 1        | 100000   | 20   | 13   | 50000    | 0.817451 | 3.32E-23 | 0 |
| chr9 | 50001    | 150000   | 35   | 30   | 1.00E+05 | 0.418355 | 8.19E-08 | 0 |
| chr9 | 100001   | 200000   | 29   | 28   | 150000   | 0.246589 | 0.000939 | 0 |
| chr9 | 1150001  | 1250000  | 585  | 784  | 1200000  | -0.22645 | 0.002353 | 0 |
| chr9 | 2350001  | 2450000  | 666  | 870  | 2400000  | -0.18953 | 0.008864 | 0 |
| chr9 | 3100001  | 3200000  | 641  | 847  | 3150000  | -0.20607 | 0.005004 | 0 |
| chr9 | 8100001  | 8200000  | 626  | 840  | 8150000  | -0.22826 | 0.002195 | 0 |
| chr9 | 8150001  | 8250000  | 576  | 827  | 8200000  | -0.32586 | 2.72E-05 | 0 |



|      |          |          |      |      |          |          |          |   |
|------|----------|----------|------|------|----------|----------|----------|---|
| chr9 | 8550001  | 8650000  | 639  | 838  | 8600000  | -0.19517 | 0.007324 | 0 |
| chr9 | 9550001  | 9650000  | 552  | 730  | 9600000  | -0.20727 | 0.004795 | 0 |
| chr9 | 9600001  | 9700000  | 556  | 740  | 9650000  | -0.21648 | 0.003428 | 0 |
| chr9 | 10300001 | 10400000 | 586  | 775  | 10350000 | -0.20733 | 0.004784 | 0 |
| chr9 | 10800001 | 10900000 | 560  | 746  | 10850000 | -0.21779 | 0.003265 | 0 |
| chr9 | 12250001 | 12350000 | 589  | 783  | 12300000 | -0.21478 | 0.00365  | 0 |
| chr9 | 21150001 | 21250000 | 434  | 572  | 21200000 | -0.20236 | 0.005708 | 0 |
| chr9 | 21500001 | 21600000 | 1031 | 1035 | 21550000 | 0.190377 | 0.008131 | 0 |
| chr9 | 22750001 | 22850000 | 613  | 826  | 22800000 | -0.23429 | 0.001735 | 0 |
| chr9 | 24200001 | 24300000 | 539  | 703  | 24250000 | -0.18728 | 0.009556 | 0 |
| chr9 | 24250001 | 24350000 | 540  | 761  | 24300000 | -0.29897 | 0.000103 | 0 |
| chr9 | 24300001 | 24400000 | 536  | 812  | 24350000 | -0.40328 | 3.53E-07 | 0 |
| chr9 | 24550001 | 24650000 | 548  | 727  | 24600000 | -0.21182 | 0.004068 | 0 |
| chr9 | 24700001 | 24800000 | 544  | 715  | 24750000 | -0.19837 | 0.006559 | 0 |
| chr9 | 24750001 | 24850000 | 553  | 722  | 24800000 | -0.18876 | 0.009097 | 0 |
| chr9 | 25050001 | 25150000 | 495  | 652  | 25100000 | -0.20148 | 0.005886 | 0 |
| chr9 | 25100001 | 25200000 | 533  | 699  | 25150000 | -0.19519 | 0.007318 | 0 |
| chr9 | 25950001 | 26050000 | 558  | 737  | 2.60E+07 | -0.20544 | 0.005119 | 0 |
| chr9 | 26000001 | 26100000 | 589  | 787  | 26050000 | -0.22213 | 0.002774 | 0 |
| chr9 | 26350001 | 26450000 | 612  | 830  | 26400000 | -0.24362 | 0.001194 | 0 |
| chr9 | 26400001 | 26500000 | 605  | 811  | 26450000 | -0.2268  | 0.002322 | 0 |
| chr9 | 27900001 | 28000000 | 735  | 969  | 27950000 | -0.20279 | 0.005622 | 0 |
| chr9 | 28550001 | 28650000 | 560  | 748  | 28600000 | -0.22165 | 0.002825 | 0 |
| chr9 | 28600001 | 28700000 | 646  | 842  | 28650000 | -0.18632 | 0.009862 | 0 |
| chr9 | 29350001 | 29450000 | 626  | 822  | 29400000 | -0.19701 | 0.006875 | 0 |
| chr9 | 29950001 | 30050000 | 590  | 775  | 3.00E+07 | -0.19752 | 0.006756 | 0 |
| chr9 | 30000001 | 30100000 | 638  | 844  | 30050000 | -0.20772 | 0.004717 | 0 |
| chr9 | 30100001 | 30200000 | 525  | 740  | 30150000 | -0.29924 | 0.000102 | 0 |
| chr9 | 30150001 | 30250000 | 583  | 795  | 30200000 | -0.2515  | 0.000863 | 0 |
| chr9 | 30250001 | 30350000 | 588  | 786  | 30300000 | -0.22275 | 0.00271  | 0 |
| chr9 | 30450001 | 30550000 | 561  | 756  | 30500000 | -0.23442 | 0.001726 | 0 |
| chr9 | 30600001 | 30700000 | 568  | 812  | 30650000 | -0.31963 | 3.73E-05 | 0 |
| chr9 | 30850001 | 30950000 | 583  | 827  | 30900000 | -0.30843 | 6.51E-05 | 0 |
| chr9 | 30900001 | 31000000 | 581  | 814  | 30950000 | -0.29053 | 0.000154 | 0 |
| chr9 | 31100001 | 31200000 | 529  | 714  | 31150000 | -0.23669 | 0.001577 | 0 |
| chr9 | 31150001 | 31250000 | 513  | 694  | 31200000 | -0.24001 | 0.001382 | 0 |
| chr9 | 31750001 | 31850000 | 579  | 776  | 31800000 | -0.22653 | 0.002346 | 0 |
| chr9 | 31800001 | 31900000 | 576  | 775  | 31850000 | -0.23216 | 0.001886 | 0 |
| chr9 | 31900001 | 32000000 | 519  | 678  | 31950000 | -0.18959 | 0.008847 | 0 |
| chr9 | 31950001 | 32050000 | 520  | 741  | 3.20E+07 | -0.315   | 4.70E-05 | 0 |
| chr9 | 32000001 | 32100000 | 570  | 751  | 32050000 | -0.20189 | 0.005803 | 0 |
| chr9 | 33000001 | 33100000 | 911  | 916  | 33050000 | 0.188066 | 0.008801 | 0 |
| chr9 | 33100001 | 33200000 | 1131 | 1118 | 33150000 | 0.212642 | 0.003648 | 0 |
| chr9 | 33150001 | 33250000 | 1167 | 1155 | 33200000 | 0.210875 | 0.003898 | 0 |
| chr9 | 33250001 | 33350000 | 1036 | 1024 | 33300000 | 0.212771 | 0.00363  | 0 |
| chr9 | 33300001 | 33400000 | 908  | 880  | 33350000 | 0.241152 | 0.00118  | 0 |
| chr9 | 33400001 | 33500000 | 911  | 913  | 33450000 | 0.192799 | 0.007477 | 0 |

|      |          |          |      |      |          |          |           |   |
|------|----------|----------|------|------|----------|----------|-----------|---|
| chr9 | 33450001 | 33550000 | 582  | 542  | 33500000 | 0.298689 | 8.50E-05  | 0 |
| chr9 | 35450001 | 35550000 | 999  | 987  | 35500000 | 0.213398 | 0.003546  | 0 |
| chr9 | 35500001 | 35600000 | 1028 | 960  | 35550000 | 0.294697 | 0.000104  | 0 |
| chr9 | 35550001 | 35650000 | 951  | 933  | 35600000 | 0.223531 | 0.002403  | 0 |
| chr9 | 35600001 | 35700000 | 1041 | 1010 | 35650000 | 0.239578 | 0.001259  | 0 |
| chr9 | 36100001 | 36200000 | 995  | 997  | 36150000 | 0.193066 | 0.007408  | 0 |
| chr9 | 38000001 | 38100000 | 1163 | 1115 | 38050000 | 0.25677  | 0.000605  | 0 |
| chr9 | 38800001 | 38900000 | 19   | 15   | 38850000 | 0.537    | 1.32E-11  | 0 |
| chr9 | 38850001 | 38950000 | 5    | 3    | 38900000 | 0.932929 | 8.75E-29  | 0 |
| chr9 | 38950001 | 39050000 | 28   | 27   | 3.90E+07 | 0.24843  | 0.000868  | 0 |
| chr9 | 39050001 | 39150000 | 46   | 80   | 39100000 | -0.6024  | 2.26E-13  | 0 |
| chr9 | 39100001 | 39200000 | 53   | 82   | 39150000 | -0.43367 | 5.29E-08  | 0 |
| chr9 | 39200001 | 39300000 | 4    | 4    | 39250000 | 0.195963 | 0.006694  | 0 |
| chr9 | 39250001 | 39350000 | 3    | 1    | 39300000 | 1.780926 | 4.68E-73  | 0 |
| chr9 | 39300001 | 39400000 | 1    | 1    | 39350000 | 0.195963 | 0.006694  | 0 |
| chr9 | 39350001 | 39450000 | 0    | 2    | 39400000 | #NAME?   | 3.67E-137 | 0 |
| chr9 | 39400001 | 39500000 | 1    | 2    | 39450000 | -0.80404 | 3.29E-21  | 0 |
| chr9 | 39450001 | 39550000 | 1    | 1    | 39500000 | 0.195963 | 0.006694  | 0 |
| chr9 | 39500001 | 39600000 | 1    | 2    | 39550000 | -0.80404 | 3.29E-21  | 0 |
| chr9 | 39550001 | 39650000 | 1    | 2    | 39600000 | -0.80404 | 3.29E-21  | 0 |
| chr9 | 39650001 | 39750000 | 1    | 3    | 39700000 | -1.389   | 6.26E-48  | 0 |
| chr9 | 39700001 | 39800000 | 2    | 6    | 39750000 | -1.389   | 6.26E-48  | 0 |
| chr9 | 39750001 | 39850000 | 2    | 4    | 39800000 | -0.80404 | 3.29E-21  | 0 |
| chr9 | 39800001 | 39900000 | 1    | 1    | 39850000 | 0.195963 | 0.006694  | 0 |
| chr9 | 40050001 | 40150000 | 1    | 3    | 40100000 | -1.389   | 6.26E-48  | 0 |
| chr9 | 40100001 | 40200000 | 4    | 4    | 40150000 | 0.195963 | 0.006694  | 0 |
| chr9 | 40150001 | 40250000 | 4    | 2    | 40200000 | 1.195963 | 1.84E-42  | 0 |
| chr9 | 40500001 | 40600000 | 5    | 5    | 40550000 | 0.195963 | 0.006694  | 0 |
| chr9 | 40550001 | 40650000 | 8    | 8    | 40600000 | 0.195963 | 0.006694  | 0 |
| chr9 | 40600001 | 40700000 | 7    | 6    | 40650000 | 0.418355 | 8.19E-08  | 0 |
| chr9 | 40650001 | 40750000 | 6    | 3    | 40700000 | 1.195963 | 1.84E-42  | 0 |
| chr9 | 40750001 | 40850000 | 9    | 14   | 40800000 | -0.44147 | 3.19E-08  | 0 |
| chr9 | 40800001 | 40900000 | 3    | 3    | 40850000 | 0.195963 | 0.006694  | 0 |
| chr9 | 40850001 | 40950000 | 1    | 1    | 40900000 | 0.195963 | 0.006694  | 0 |
| chr9 | 40900001 | 41000000 | 0    | 1    | 40950000 | #NAME?   | 3.67E-137 | 0 |
| chr9 | 41050001 | 41150000 | 1    | 1    | 41100000 | 0.195963 | 0.006694  | 0 |
| chr9 | 41100001 | 41200000 | 1    | 1    | 41150000 | 0.195963 | 0.006694  | 0 |
| chr9 | 41150001 | 41250000 | 1    | 8    | 41200000 | -2.80404 | 1.48E-99  | 0 |
| chr9 | 41200001 | 41300000 | 4    | 13   | 41250000 | -1.50448 | 3.03E-53  | 0 |
| chr9 | 41250001 | 41350000 | 4    | 6    | 41300000 | -0.389   | 8.31E-07  | 0 |
| chr9 | 41300001 | 41400000 | 1    | 1    | 41350000 | 0.195963 | 0.006694  | 0 |
| chr9 | 41650001 | 41750000 | 1    | 1    | 41700000 | 0.195963 | 0.006694  | 0 |
| chr9 | 41700001 | 41800000 | 2    | 1    | 41750000 | 1.195963 | 1.84E-42  | 0 |
| chr9 | 41800001 | 41900000 | 1    | 3    | 41850000 | -1.389   | 6.26E-48  | 0 |
| chr9 | 41850001 | 41950000 | 2    | 7    | 41900000 | -1.61139 | 4.72E-58  | 0 |
| chr9 | 41900001 | 42000000 | 22   | 19   | 41950000 | 0.407467 | 1.67E-07  | 0 |
| chr9 | 41950001 | 42050000 | 21   | 16   | 4.20E+07 | 0.58828  | 1.79E-13  | 0 |

|      |          |          |    |    |          |          |           |   |
|------|----------|----------|----|----|----------|----------|-----------|---|
| chr9 | 42000001 | 42100000 | 1  | 1  | 42050000 | 0.195963 | 0.006694  | 0 |
| chr9 | 42050001 | 42150000 | 0  | 1  | 42100000 | #NAME?   | 3.67E-137 | 0 |
| chr9 | 42100001 | 42200000 | 3  | 4  | 42150000 | -0.21907 | 0.003112  | 0 |
| chr9 | 42150001 | 42250000 | 4  | 6  | 42200000 | -0.389   | 8.31E-07  | 0 |
| chr9 | 42200001 | 42300000 | 3  | 3  | 42250000 | 0.195963 | 0.006694  | 0 |
| chr9 | 42250001 | 42350000 | 2  | 1  | 42300000 | 1.195963 | 1.84E-42  | 0 |
| chr9 | 42300001 | 42400000 | 1  | 3  | 42350000 | -1.389   | 6.26E-48  | 0 |
| chr9 | 42350001 | 42450000 | 5  | 5  | 42400000 | 0.195963 | 0.006694  | 0 |
| chr9 | 42400001 | 42500000 | 4  | 9  | 42450000 | -0.97396 | 1.25E-28  | 0 |
| chr9 | 42450001 | 42550000 | 3  | 6  | 42500000 | -0.80404 | 3.29E-21  | 0 |
| chr9 | 42500001 | 42600000 | 4  | 2  | 42550000 | 1.195963 | 1.84E-42  | 0 |
| chr9 | 42550001 | 42650000 | 1  | 2  | 42600000 | -0.80404 | 3.29E-21  | 0 |
| chr9 | 42800001 | 42900000 | 2  | 3  | 42850000 | -0.389   | 8.31E-07  | 0 |
| chr9 | 42900001 | 43000000 | 3  | 6  | 42950000 | -0.80404 | 3.29E-21  | 0 |
| chr9 | 42950001 | 43050000 | 2  | 5  | 4.30E+07 | -1.12597 | 1.27E-35  | 0 |
| chr9 | 43000001 | 43100000 | 1  | 2  | 43050000 | -0.80404 | 3.29E-21  | 0 |
| chr9 | 43050001 | 43150000 | 3  | 2  | 43100000 | 0.780926 | 1.60E-21  | 0 |
| chr9 | 43100001 | 43200000 | 8  | 3  | 43150000 | 1.611001 | 1.67E-64  | 0 |
| chr9 | 43150001 | 43250000 | 5  | 2  | 43200000 | 1.517891 | 1.18E-59  | 0 |
| chr9 | 43250001 | 43350000 | 3  | 1  | 43300000 | 1.780926 | 4.68E-73  | 0 |
| chr9 | 43300001 | 43400000 | 4  | 6  | 43350000 | -0.389   | 8.31E-07  | 0 |
| chr9 | 43350001 | 43450000 | 2  | 7  | 43400000 | -1.61139 | 4.72E-58  | 0 |
| chr9 | 43400001 | 43500000 | 4  | 6  | 43450000 | -0.389   | 8.31E-07  | 0 |
| chr9 | 43450001 | 43550000 | 22 | 17 | 43500000 | 0.567932 | 1.02E-12  | 0 |
| chr9 | 43500001 | 43600000 | 20 | 14 | 43550000 | 0.710536 | 2.09E-18  | 0 |
| chr9 | 43600001 | 43700000 | 30 | 47 | 43650000 | -0.45174 | 1.62E-08  | 0 |
| chr9 | 43650001 | 43750000 | 22 | 37 | 43700000 | -0.55406 | 1.05E-11  | 0 |
| chr9 | 43700001 | 43800000 | 8  | 8  | 43750000 | 0.195963 | 0.006694  | 0 |
| chr9 | 43850001 | 43950000 | 10 | 8  | 43900000 | 0.517891 | 6.05E-11  | 0 |
| chr9 | 43900001 | 44000000 | 3  | 2  | 43950000 | 0.780926 | 1.60E-21  | 0 |
| chr9 | 44000001 | 44100000 | 29 | 38 | 44050000 | -0.19398 | 0.007627  | 0 |
| chr9 | 44300001 | 44400000 | 3  | 5  | 44350000 | -0.541   | 2.84E-11  | 0 |
| chr9 | 44700001 | 44800000 | 24 | 38 | 44750000 | -0.467   | 5.83E-09  | 0 |
| chr9 | 44750001 | 44850000 | 32 | 48 | 44800000 | -0.389   | 8.31E-07  | 0 |
| chr9 | 44900001 | 45000000 | 16 | 23 | 44950000 | -0.3276  | 2.48E-05  | 0 |
| chr9 | 44950001 | 45050000 | 10 | 15 | 4.50E+07 | -0.389   | 8.31E-07  | 0 |
| chr9 | 45000001 | 45100000 | 0  | 6  | 45050000 | #NAME?   | 3.67E-137 | 0 |
| chr9 | 45050001 | 45150000 | 2  | 6  | 45100000 | -1.389   | 6.26E-48  | 0 |
| chr9 | 45100001 | 45200000 | 2  | 3  | 45150000 | -0.389   | 8.31E-07  | 0 |
| chr9 | 45300001 | 45400000 | 11 | 22 | 45350000 | -0.80404 | 3.29E-21  | 0 |
| chr9 | 45350001 | 45450000 | 20 | 36 | 45400000 | -0.65203 | 3.56E-15  | 0 |
| chr9 | 45400001 | 45500000 | 14 | 20 | 45450000 | -0.31861 | 3.93E-05  | 0 |
| chr9 | 45450001 | 45550000 | 6  | 6  | 45500000 | 0.195963 | 0.006694  | 0 |
| chr9 | 45500001 | 45600000 | 1  | 1  | 45550000 | 0.195963 | 0.006694  | 0 |
| chr9 | 45550001 | 45650000 | 1  | 1  | 45600000 | 0.195963 | 0.006694  | 0 |
| chr9 | 45600001 | 45700000 | 3  | 2  | 45650000 | 0.780926 | 1.60E-21  | 0 |
| chr9 | 45750001 | 45850000 | 2  | 4  | 45800000 | -0.80404 | 3.29E-21  | 0 |

|      |          |          |     |     |          |          |           |   |
|------|----------|----------|-----|-----|----------|----------|-----------|---|
| chr9 | 45800001 | 45900000 | 1   | 2   | 45850000 | -0.80404 | 3.29E-21  | 0 |
| chr9 | 46250001 | 46350000 | 3   | 4   | 46300000 | -0.21907 | 0.003112  | 0 |
| chr9 | 46350001 | 46450000 | 3   | 3   | 46400000 | 0.195963 | 0.006694  | 0 |
| chr9 | 46400001 | 46500000 | 0   | 1   | 46450000 | #NAME?   | 3.67E-137 | 0 |
| chr9 | 46800001 | 46900000 | 2   | 3   | 46850000 | -0.389   | 8.31E-07  | 0 |
| chr9 | 46850001 | 46950000 | 4   | 4   | 46900000 | 0.195963 | 0.006694  | 0 |
| chr9 | 46900001 | 47000000 | 2   | 1   | 46950000 | 1.195963 | 1.84E-42  | 0 |
| chr9 | 47150001 | 47250000 | 41  | 30  | 47200000 | 0.646624 | 9.54E-16  | 0 |
| chr9 | 47200001 | 47300000 | 26  | 13  | 47250000 | 1.195963 | 1.84E-42  | 0 |
| chr9 | 65500001 | 65600000 | 2   | 3   | 65550000 | -0.389   | 8.31E-07  | 0 |
| chr9 | 65550001 | 65650000 | 9   | 12  | 65600000 | -0.21907 | 0.003112  | 0 |
| chr9 | 65650001 | 65750000 | 0   | 1   | 65700000 | #NAME?   | 3.67E-137 | 0 |
| chr9 | 65700001 | 65800000 | 2   | 1   | 65750000 | 1.195963 | 1.84E-42  | 0 |
| chr9 | 65750001 | 65850000 | 2   | 1   | 65800000 | 1.195963 | 1.84E-42  | 0 |
| chr9 | 65800001 | 65900000 | 0   | 1   | 65850000 | #NAME?   | 3.67E-137 | 0 |
| chr9 | 65950001 | 66050000 | 2   | 1   | 6.60E+07 | 1.195963 | 1.84E-42  | 0 |
| chr9 | 66000001 | 66100000 | 3   | 1   | 66050000 | 1.780926 | 4.68E-73  | 0 |
| chr9 | 66200001 | 66300000 | 8   | 12  | 66250000 | -0.389   | 8.31E-07  | 0 |
| chr9 | 66300001 | 66400000 | 12  | 11  | 66350000 | 0.321494 | 2.63E-05  | 0 |
| chr9 | 66550001 | 66650000 | 2   | 1   | 66600000 | 1.195963 | 1.84E-42  | 0 |
| chr9 | 66600001 | 66700000 | 0   | 2   | 66650000 | #NAME?   | 3.67E-137 | 0 |
| chr9 | 66800001 | 66900000 | 457 | 619 | 66850000 | -0.24178 | 0.001287  | 0 |
| chr9 | 66850001 | 66950000 | 152 | 233 | 66900000 | -0.4203  | 1.24E-07  | 0 |
| chr9 | 66900001 | 67000000 | 4   | 13  | 66950000 | -1.50448 | 3.03E-53  | 0 |
| chr9 | 66950001 | 67050000 | 4   | 12  | 6.70E+07 | -1.389   | 6.26E-48  | 0 |
| chr9 | 67000001 | 67100000 | 0   | 1   | 67050000 | #NAME?   | 3.67E-137 | 0 |
| chr9 | 67150001 | 67250000 | 1   | 2   | 67200000 | -0.80404 | 3.29E-21  | 0 |
| chr9 | 67200001 | 67300000 | 4   | 4   | 67250000 | 0.195963 | 0.006694  | 0 |
| chr9 | 67350001 | 67450000 | 4   | 2   | 67400000 | 1.195963 | 1.84E-42  | 0 |
| chr9 | 67450001 | 67550000 | 1   | 1   | 67500000 | 0.195963 | 0.006694  | 0 |
| chr9 | 67500001 | 67600000 | 1   | 1   | 67550000 | 0.195963 | 0.006694  | 0 |
| chr9 | 67650001 | 67750000 | 5   | 7   | 67700000 | -0.28946 | 0.000161  | 0 |
| chr9 | 67700001 | 67800000 | 4   | 6   | 67750000 | -0.389   | 8.31E-07  | 0 |
| chr9 | 67750001 | 67850000 | 5   | 8   | 67800000 | -0.48211 | 2.06E-09  | 0 |
| chr9 | 68050001 | 68150000 | 3   | 4   | 68100000 | -0.21907 | 0.003112  | 0 |
| chr9 | 68100001 | 68200000 | 11  | 17  | 68150000 | -0.43207 | 5.86E-08  | 0 |
| chr9 | 68150001 | 68250000 | 18  | 29  | 68200000 | -0.49209 | 1.02E-09  | 0 |
| chr9 | 68250001 | 68350000 | 57  | 54  | 68300000 | 0.273966 | 0.000279  | 0 |
| chr9 | 68450001 | 68550000 | 101 | 135 | 68500000 | -0.22264 | 0.002721  | 0 |
| chr9 | 68500001 | 68600000 | 21  | 34  | 68550000 | -0.49918 | 6.17E-10  | 0 |
| chr9 | 68700001 | 68800000 | 12  | 9   | 68750000 | 0.611001 | 2.44E-14  | 0 |
| chr9 | 68750001 | 68850000 | 5   | 7   | 68800000 | -0.28946 | 0.000161  | 0 |
| chr9 | 68800001 | 68900000 | 1   | 7   | 68850000 | -2.61139 | 1.81E-94  | 0 |
| chr9 | 68900001 | 69000000 | 84  | 78  | 68950000 | 0.302878 | 6.89E-05  | 0 |
| chr9 | 69050001 | 69150000 | 10  | 10  | 69100000 | 0.195963 | 0.006694  | 0 |
| chr9 | 69100001 | 69200000 | 18  | 16  | 69150000 | 0.365888 | 2.19E-06  | 0 |
| chr9 | 69150001 | 69250000 | 16  | 14  | 69200000 | 0.388608 | 5.52E-07  | 0 |

|      |          |          |     |     |          |          |          |   |
|------|----------|----------|-----|-----|----------|----------|----------|---|
| chr9 | 69250001 | 69350000 | 3   | 7   | 69300000 | -1.02643 | 5.11E-31 | 0 |
| chr9 | 69300001 | 69400000 | 3   | 10  | 69350000 | -1.541   | 6.69E-55 | 0 |
| chr9 | 69350001 | 69450000 | 11  | 19  | 69400000 | -0.59253 | 5.04E-13 | 0 |
| chr9 | 69400001 | 69500000 | 16  | 24  | 69450000 | -0.389   | 8.31E-07 | 0 |
| chr9 | 69450001 | 69550000 | 13  | 25  | 69500000 | -0.74745 | 6.98E-19 | 0 |
| chr9 | 69500001 | 69600000 | 11  | 19  | 69550000 | -0.59253 | 5.04E-13 | 0 |
| chr9 | 69600001 | 69700000 | 4   | 4   | 69650000 | 0.195963 | 0.006694 | 0 |
| chr9 | 69650001 | 69750000 | 2   | 4   | 69700000 | -0.80404 | 3.29E-21 | 0 |
| chr9 | 69700001 | 69800000 | 7   | 15  | 69750000 | -0.90357 | 1.73E-25 | 0 |
| chr9 | 69750001 | 69850000 | 80  | 114 | 69800000 | -0.315   | 4.70E-05 | 0 |
| chr9 | 69800001 | 69900000 | 77  | 108 | 69850000 | -0.29214 | 0.000142 | 0 |
| chr9 | 69850001 | 69950000 | 5   | 13  | 69900000 | -1.18255 | 2.87E-38 | 0 |
| chr9 | 70050001 | 70150000 | 2   | 4   | 70100000 | -0.80404 | 3.29E-21 | 0 |
| chr9 | 70100001 | 70200000 | 6   | 11  | 70150000 | -0.67851 | 3.57E-16 | 0 |
| chr9 | 70150001 | 70250000 | 4   | 7   | 70200000 | -0.61139 | 1.08E-13 | 0 |
| chr9 | 70550001 | 70650000 | 9   | 9   | 70600000 | 0.195963 | 0.006694 | 0 |
| chr9 | 70600001 | 70700000 | 11  | 8   | 70650000 | 0.655395 | 4.21E-16 | 0 |
| chr9 | 70650001 | 70750000 | 6   | 4   | 70700000 | 0.780926 | 1.60E-21 | 0 |
| chr9 | 70750001 | 70850000 | 3   | 9   | 70800000 | -1.389   | 6.26E-48 | 0 |
| chr9 | 70800001 | 70900000 | 7   | 14  | 70850000 | -0.80404 | 3.29E-21 | 0 |
| chr9 | 70850001 | 70950000 | 9   | 9   | 70900000 | 0.195963 | 0.006694 | 0 |
| chr9 | 70900001 | 71000000 | 23  | 22  | 70950000 | 0.260093 | 0.000523 | 0 |
| chr9 | 70950001 | 71050000 | 117 | 176 | 7.10E+07 | -0.3931  | 6.52E-07 | 0 |
| chr9 | 71450001 | 71550000 | 508 | 665 | 71500000 | -0.19256 | 0.008004 | 0 |
| chr9 | 73000001 | 73100000 | 643 | 648 | 73050000 | 0.184788 | 0.009834 | 0 |
| chr9 | 74100001 | 74200000 | 553 | 735 | 74150000 | -0.2145  | 0.003687 | 0 |
| chr9 | 74150001 | 74250000 | 488 | 677 | 74200000 | -0.27631 | 0.000295 | 0 |
| chr9 | 74750001 | 74850000 | 681 | 659 | 74800000 | 0.243339 | 0.001077 | 0 |
| chr9 | 74900001 | 75000000 | 592 | 593 | 74950000 | 0.193528 | 0.00729  | 0 |
| chr9 | 75800001 | 75900000 | 518 | 678 | 75850000 | -0.19237 | 0.008056 | 0 |
| chr9 | 76750001 | 76850000 | 379 | 535 | 76800000 | -0.30138 | 9.18E-05 | 0 |
| chr9 | 76800001 | 76900000 | 398 | 538 | 76850000 | -0.23887 | 0.001446 | 0 |
| chr9 | 77400001 | 77500000 | 444 | 579 | 77450000 | -0.18704 | 0.009631 | 0 |
| chr9 | 77900001 | 78000000 | 328 | 454 | 77950000 | -0.27303 | 0.000341 | 0 |
| chr9 | 77950001 | 78050000 | 379 | 538 | 7.80E+07 | -0.30945 | 6.19E-05 | 0 |
| chr9 | 78100001 | 78200000 | 415 | 565 | 78150000 | -0.24918 | 0.000951 | 0 |
| chr9 | 78150001 | 78250000 | 386 | 530 | 78200000 | -0.26143 | 0.000567 | 0 |
| chr9 | 78200001 | 78300000 | 396 | 548 | 78250000 | -0.27271 | 0.000346 | 0 |
| chr9 | 78250001 | 78350000 | 409 | 556 | 78300000 | -0.24702 | 0.001039 | 0 |
| chr9 | 78300001 | 78400000 | 365 | 500 | 78350000 | -0.25807 | 0.000655 | 0 |
| chr9 | 78500001 | 78600000 | 459 | 606 | 78550000 | -0.20486 | 0.005225 | 0 |
| chr9 | 80000001 | 80100000 | 519 | 505 | 80050000 | 0.235414 | 0.001494 | 0 |
| chr9 | 81200001 | 81300000 | 427 | 564 | 81250000 | -0.2055  | 0.005108 | 0 |
| chr9 | 81250001 | 81350000 | 403 | 561 | 81300000 | -0.28126 | 0.000236 | 0 |
| chr9 | 81950001 | 82050000 | 447 | 599 | 8.20E+07 | -0.22632 | 0.002365 | 0 |
| chr9 | 82000001 | 82100000 | 417 | 571 | 82050000 | -0.25748 | 0.000671 | 0 |
| chr9 | 82950001 | 83050000 | 408 | 547 | 8.30E+07 | -0.22701 | 0.002303 | 0 |

|      |          |          |      |      |          |          |          |   |
|------|----------|----------|------|------|----------|----------|----------|---|
| chr9 | 83300001 | 83400000 | 365  | 506  | 83350000 | -0.27528 | 0.000309 | 0 |
| chr9 | 83350001 | 83450000 | 364  | 484  | 83400000 | -0.21511 | 0.003606 | 0 |
| chr9 | 84000001 | 84100000 | 394  | 515  | 84050000 | -0.19041 | 0.008606 | 0 |
| chr9 | 84550001 | 84650000 | 348  | 461  | 84600000 | -0.20972 | 0.00439  | 0 |
| chr9 | 84700001 | 84800000 | 410  | 575  | 84750000 | -0.29198 | 0.000144 | 0 |
| chr9 | 84750001 | 84850000 | 398  | 535  | 84800000 | -0.23081 | 0.001989 | 0 |
| chr9 | 85250001 | 85350000 | 423  | 569  | 85300000 | -0.23181 | 0.001912 | 0 |
| chr9 | 85450001 | 85550000 | 419  | 556  | 85500000 | -0.21217 | 0.004016 | 0 |
| chr9 | 85500001 | 85600000 | 416  | 574  | 85550000 | -0.2685  | 0.000417 | 0 |
| chr9 | 85750001 | 85850000 | 408  | 554  | 85800000 | -0.24535 | 0.001113 | 0 |
| chr9 | 85800001 | 85900000 | 420  | 563  | 85850000 | -0.22678 | 0.002324 | 0 |
| chr9 | 85850001 | 85950000 | 466  | 620  | 85900000 | -0.21598 | 0.003492 | 0 |
| chr9 | 86400001 | 86500000 | 243  | 234  | 86450000 | 0.250411 | 0.000797 | 0 |
| chr9 | 86450001 | 86550000 | 228  | 210  | 86500000 | 0.314608 | 3.78E-05 | 0 |
| chr9 | 87100001 | 87200000 | 430  | 578  | 87150000 | -0.23077 | 0.001991 | 0 |
| chr9 | 87250001 | 87350000 | 438  | 575  | 87300000 | -0.19667 | 0.006957 | 0 |
| chr9 | 87400001 | 87500000 | 444  | 581  | 87450000 | -0.19202 | 0.008154 | 0 |
| chr9 | 87450001 | 87550000 | 430  | 568  | 87500000 | -0.20559 | 0.005091 | 0 |
| chr9 | 87800001 | 87900000 | 443  | 587  | 87850000 | -0.21009 | 0.004331 | 0 |
| chr9 | 87850001 | 87950000 | 445  | 580  | 87900000 | -0.18628 | 0.009875 | 0 |
| chr9 | 88350001 | 88450000 | 191  | 182  | 88400000 | 0.265597 | 0.000409 | 0 |
| chr9 | 89950001 | 90050000 | 579  | 559  | 9.00E+07 | 0.246678 | 0.000935 | 0 |
| chr9 | 90700001 | 90800000 | 336  | 439  | 90750000 | -0.1898  | 0.008786 | 0 |
| chr9 | 92350001 | 92450000 | 32   | 51   | 92400000 | -0.47646 | 3.05E-09 | 0 |
| chr9 | 92400001 | 92500000 | 306  | 447  | 92450000 | -0.35078 | 7.27E-06 | 0 |
| chr9 | 92450001 | 92550000 | 452  | 624  | 92500000 | -0.26926 | 0.000403 | 0 |
| chr9 | 92600001 | 92700000 | 151  | 146  | 92650000 | 0.244543 | 0.001023 | 0 |
| chr9 | 92900001 | 93000000 | 336  | 337  | 92950000 | 0.191676 | 0.007774 | 0 |
| chr9 | 94500001 | 94600000 | 1001 | 1003 | 94550000 | 0.193083 | 0.007404 | 0 |
| chr9 | 94550001 | 94650000 | 1044 | 1032 | 94600000 | 0.212642 | 0.003648 | 0 |
| chr9 | 94850001 | 94950000 | 761  | 732  | 94900000 | 0.252016 | 0.000744 | 0 |
| chr9 | 95800001 | 95900000 | 1118 | 1126 | 95850000 | 0.185676 | 0.009544 | 0 |
| chr9 | 95850001 | 95950000 | 1134 | 1120 | 95900000 | 0.213885 | 0.003481 | 0 |
| chr9 | 99600001 | 99700000 | 541  | 544  | 99650000 | 0.187985 | 0.008825 | 0 |
| chr9 | 1E+08    | 1E+08    | 986  | 983  | 1E+08    | 0.200359 | 0.005726 | 0 |
| chr9 | 1.01E+08 | 1.01E+08 | 993  | 1001 | 1.01E+08 | 0.184387 | 0.009967 | 0 |
| chr9 | 1.02E+08 | 1.02E+08 | 834  | 1087 | 1.02E+08 | -0.18627 | 0.009879 | 0 |
| chr9 | 1.07E+08 | 1.07E+08 | 616  | 830  | 1.07E+08 | -0.23422 | 0.00174  | 0 |
| chr9 | 1.08E+08 | 1.08E+08 | 758  | 1007 | 1.08E+08 | -0.21383 | 0.003779 | 0 |
| chr9 | 1.08E+08 | 1.08E+08 | 677  | 933  | 1.08E+08 | -0.26676 | 0.00045  | 0 |
| chr9 | 1.09E+08 | 1.09E+08 | 660  | 885  | 1.09E+08 | -0.22725 | 0.002282 | 0 |
| chr9 | 1.16E+08 | 1.16E+08 | 995  | 982  | 1.16E+08 | 0.214937 | 0.003345 | 0 |
| chr9 | 1.16E+08 | 1.16E+08 | 1092 | 1092 | 1.16E+08 | 0.195963 | 0.006694 | 0 |
| chr9 | 1.17E+08 | 1.17E+08 | 893  | 1171 | 1.17E+08 | -0.19505 | 0.007355 | 0 |
| chr9 | 1.18E+08 | 1.18E+08 | 687  | 899  | 1.18E+08 | -0.19205 | 0.008145 | 0 |
| chr9 | 1.2E+08  | 1.2E+08  | 697  | 914  | 1.2E+08  | -0.19507 | 0.007349 | 0 |
| chr9 | 1.21E+08 | 1.21E+08 | 710  | 964  | 1.21E+08 | -0.24525 | 0.001117 | 0 |

|      |          |          |      |      |          |          |          |   |
|------|----------|----------|------|------|----------|----------|----------|---|
| chr9 | 1.22E+08 | 1.22E+08 | 676  | 897  | 1.22E+08 | -0.21212 | 0.004023 | 0 |
| chr9 | 1.22E+08 | 1.22E+08 | 642  | 840  | 1.22E+08 | -0.19185 | 0.008199 | 0 |
| chr9 | 1.22E+08 | 1.22E+08 | 705  | 942  | 1.22E+08 | -0.22214 | 0.002773 | 0 |
| chr9 | 1.29E+08 | 1.29E+08 | 1046 | 1044 | 1.29E+08 | 0.198724 | 0.00607  | 0 |
| chr9 | 1.3E+08  | 1.3E+08  | 999  | 980  | 1.3E+08  | 0.223666 | 0.00239  | 0 |
| chr9 | 1.3E+08  | 1.31E+08 | 1211 | 1067 | 1.31E+08 | 0.378602 | 1.02E-06 | 0 |
| chr9 | 1.31E+08 | 1.31E+08 | 1125 | 1058 | 1.31E+08 | 0.284548 | 0.000169 | 0 |
| chr9 | 1.31E+08 | 1.31E+08 | 1146 | 1116 | 1.31E+08 | 0.234233 | 0.001568 | 0 |
| chr9 | 1.31E+08 | 1.31E+08 | 1176 | 1080 | 1.31E+08 | 0.31882  | 3.03E-05 | 0 |
| chr9 | 1.31E+08 | 1.31E+08 | 1227 | 1085 | 1.31E+08 | 0.373403 | 1.40E-06 | 0 |
| chr9 | 1.31E+08 | 1.31E+08 | 1105 | 1023 | 1.31E+08 | 0.307203 | 5.54E-05 | 0 |
| chr9 | 1.31E+08 | 1.31E+08 | 986  | 954  | 1.31E+08 | 0.243561 | 0.001067 | 0 |
| chr9 | 1.31E+08 | 1.31E+08 | 1046 | 974  | 1.31E+08 | 0.298852 | 8.43E-05 | 0 |
| chr9 | 1.31E+08 | 1.31E+08 | 1011 | 999  | 1.31E+08 | 0.213189 | 0.003574 | 0 |
| chr9 | 1.31E+08 | 1.31E+08 | 951  | 958  | 1.31E+08 | 0.185383 | 0.009639 | 0 |
| chr9 | 1.31E+08 | 1.31E+08 | 919  | 924  | 1.31E+08 | 0.188135 | 0.00878  | 0 |
| chr9 | 1.31E+08 | 1.31E+08 | 1032 | 1006 | 1.31E+08 | 0.232776 | 0.001663 | 0 |
| chr9 | 1.31E+08 | 1.31E+08 | 886  | 850  | 1.31E+08 | 0.255807 | 0.000631 | 0 |
| chr9 | 1.31E+08 | 1.32E+08 | 892  | 808  | 1.31E+08 | 0.338651 | 1.04E-05 | 0 |
| chr9 | 1.32E+08 | 1.32E+08 | 947  | 911  | 1.32E+08 | 0.251876 | 0.000749 | 0 |
| chr9 | 1.32E+08 | 1.32E+08 | 942  | 936  | 1.32E+08 | 0.205182 | 0.004809 | 0 |
| chr9 | 1.32E+08 | 1.32E+08 | 996  | 972  | 1.32E+08 | 0.231152 | 0.001776 | 0 |
| chr9 | 1.32E+08 | 1.32E+08 | 1045 | 972  | 1.32E+08 | 0.300438 | 7.79E-05 | 0 |
| chr9 | 1.32E+08 | 1.32E+08 | 1054 | 1017 | 1.32E+08 | 0.247518 | 0.000902 | 0 |
| chr9 | 1.32E+08 | 1.32E+08 | 1155 | 1079 | 1.32E+08 | 0.294161 | 0.000106 | 0 |
| chr9 | 1.32E+08 | 1.32E+08 | 1129 | 1109 | 1.32E+08 | 0.221749 | 0.002576 | 0 |
| chr9 | 1.32E+08 | 1.32E+08 | 1194 | 1198 | 1.32E+08 | 0.191138 | 0.00792  | 0 |
| chr9 | 1.32E+08 | 1.32E+08 | 1105 | 1107 | 1.32E+08 | 0.193354 | 0.007334 | 0 |
| chr9 | 1.32E+08 | 1.32E+08 | 1065 | 1059 | 1.32E+08 | 0.204114 | 0.005    | 0 |
| chr9 | 1.32E+08 | 1.32E+08 | 1134 | 1135 | 1.32E+08 | 0.194691 | 0.007    | 0 |
| chr9 | 1.32E+08 | 1.33E+08 | 1183 | 1122 | 1.32E+08 | 0.27234  | 0.0003   | 0 |
| chr9 | 1.32E+08 | 1.33E+08 | 1047 | 968  | 1.33E+08 | 0.309146 | 5.01E-05 | 0 |
| chr9 | 1.33E+08 | 1.33E+08 | 1014 | 956  | 1.33E+08 | 0.280938 | 0.000201 | 0 |
| chr9 | 1.33E+08 | 1.33E+08 | 1101 | 1081 | 1.33E+08 | 0.222411 | 0.00251  | 0 |
| chr9 | 1.33E+08 | 1.33E+08 | 264  | 258  | 1.33E+08 | 0.22913  | 0.001926 | 0 |
| chr9 | 1.33E+08 | 1.33E+08 | 337  | 328  | 1.33E+08 | 0.235016 | 0.001519 | 0 |
| chr9 | 1.33E+08 | 1.33E+08 | 881  | 880  | 1.33E+08 | 0.197602 | 0.006317 | 0 |
| chr9 | 1.34E+08 | 1.34E+08 | 1049 | 1046 | 1.34E+08 | 0.200095 | 0.00578  | 0 |
| chr9 | 1.34E+08 | 1.34E+08 | 971  | 933  | 1.34E+08 | 0.253557 | 0.000696 | 0 |
| chr9 | 1.34E+08 | 1.34E+08 | 1062 | 1055 | 1.34E+08 | 0.205504 | 0.004753 | 0 |
| chr9 | 1.34E+08 | 1.34E+08 | 895  | 892  | 1.34E+08 | 0.200807 | 0.005635 | 0 |
| chr9 | 1.34E+08 | 1.34E+08 | 977  | 977  | 1.34E+08 | 0.195963 | 0.006694 | 0 |
| chr9 | 1.34E+08 | 1.34E+08 | 1096 | 1074 | 1.34E+08 | 0.225217 | 0.002249 | 0 |
| chr9 | 1.34E+08 | 1.34E+08 | 1057 | 1031 | 1.34E+08 | 0.231894 | 0.001724 | 0 |
| chr9 | 1.35E+08 | 1.35E+08 | 1086 | 1067 | 1.35E+08 | 0.221427 | 0.002608 | 0 |
| chr9 | 1.35E+08 | 1.35E+08 | 1014 | 973  | 1.35E+08 | 0.255509 | 0.000639 | 0 |
| chr9 | 1.35E+08 | 1.35E+08 | 990  | 979  | 1.35E+08 | 0.212083 | 0.003725 | 0 |

|      |          |          |      |      |          |          |          |   |
|------|----------|----------|------|------|----------|----------|----------|---|
| chr9 | 1.36E+08 | 1.36E+08 | 1040 | 1043 | 1.36E+08 | 0.191807 | 0.007739 | 0 |
| chr9 | 1.36E+08 | 1.36E+08 | 990  | 964  | 1.36E+08 | 0.234358 | 0.00156  | 0 |
| chr9 | 1.36E+08 | 1.36E+08 | 1132 | 1023 | 1.36E+08 | 0.342031 | 8.62E-06 | 0 |
| chr9 | 1.36E+08 | 1.36E+08 | 1051 | 978  | 1.36E+08 | 0.299819 | 8.04E-05 | 0 |
| chr9 | 1.36E+08 | 1.36E+08 | 1179 | 1056 | 1.36E+08 | 0.354917 | 4.15E-06 | 0 |
| chr9 | 1.36E+08 | 1.36E+08 | 1120 | 1088 | 1.36E+08 | 0.237783 | 0.001356 | 0 |
| chr9 | 1.36E+08 | 1.36E+08 | 1179 | 1188 | 1.36E+08 | 0.184992 | 0.009767 | 0 |
| chr9 | 1.37E+08 | 1.37E+08 | 1100 | 1050 | 1.37E+08 | 0.263077 | 0.000458 | 0 |
| chr9 | 1.37E+08 | 1.37E+08 | 1106 | 1052 | 1.37E+08 | 0.26818  | 0.000364 | 0 |
| chr9 | 1.37E+08 | 1.37E+08 | 590  | 594  | 1.37E+08 | 0.186215 | 0.009372 | 0 |
| chr9 | 1.37E+08 | 1.37E+08 | 1338 | 1328 | 1.37E+08 | 0.206786 | 0.004535 | 0 |
| chr9 | 1.37E+08 | 1.37E+08 | 1405 | 1356 | 1.37E+08 | 0.247176 | 0.000916 | 0 |
| chr9 | 1.37E+08 | 1.37E+08 | 1416 | 1371 | 1.37E+08 | 0.242556 | 0.001112 | 0 |
| chr9 | 1.38E+08 | 1.38E+08 | 1233 | 1213 | 1.38E+08 | 0.219556 | 0.002804 | 0 |
| chr9 | 1.38E+08 | 1.38E+08 | 1248 | 1234 | 1.38E+08 | 0.212239 | 0.003704 | 0 |
| chr9 | 1.38E+08 | 1.38E+08 | 1062 | 1005 | 1.38E+08 | 0.275551 | 0.000259 | 0 |
| chr9 | 1.38E+08 | 1.38E+08 | 997  | 949  | 1.38E+08 | 0.267148 | 0.000381 | 0 |
| chr9 | 1.38E+08 | 1.38E+08 | 964  | 966  | 1.38E+08 | 0.192973 | 0.007432 | 0 |
| chr9 | 1.39E+08 | 1.39E+08 | 1133 | 1125 | 1.39E+08 | 0.206186 | 0.004636 | 0 |
| chr9 | 1.39E+08 | 1.39E+08 | 1305 | 1258 | 1.39E+08 | 0.248881 | 0.000851 | 0 |
| chr9 | 1.39E+08 | 1.39E+08 | 922  | 918  | 1.39E+08 | 0.202236 | 0.005352 | 0 |
| chr9 | 1.39E+08 | 1.39E+08 | 1268 | 1189 | 1.39E+08 | 0.288769 | 0.000138 | 0 |
| chr9 | 1.39E+08 | 1.39E+08 | 1280 | 1185 | 1.39E+08 | 0.30722  | 5.53E-05 | 0 |
| chr9 | 1.39E+08 | 1.39E+08 | 1242 | 1177 | 1.39E+08 | 0.273514 | 0.000285 | 0 |
| chr9 | 1.39E+08 | 1.39E+08 | 838  | 792  | 1.39E+08 | 0.277413 | 0.000237 | 0 |
| chr9 | 1.39E+08 | 1.39E+08 | 653  | 658  | 1.39E+08 | 0.184958 | 0.009778 | 0 |
| chr9 | 1.39E+08 | 1.39E+08 | 1122 | 1105 | 1.39E+08 | 0.217989 | 0.002978 | 0 |
| chr9 | 1.39E+08 | 1.39E+08 | 1282 | 1190 | 1.39E+08 | 0.303398 | 6.71E-05 | 0 |
| chr9 | 1.39E+08 | 1.39E+08 | 1212 | 1124 | 1.39E+08 | 0.304711 | 6.28E-05 | 0 |
| chr9 | 1.39E+08 | 1.39E+08 | 1299 | 1241 | 1.39E+08 | 0.261861 | 0.000483 | 0 |
| chr9 | 1.39E+08 | 1.4E+08  | 1308 | 1302 | 1.39E+08 | 0.202596 | 0.005283 | 0 |
| chr9 | 1.39E+08 | 1.4E+08  | 1193 | 1199 | 1.4E+08  | 0.188725 | 0.008605 | 0 |
| chr9 | 1.4E+08  | 1.4E+08  | 1193 | 1193 | 1.4E+08  | 0.195963 | 0.006694 | 0 |
| chr9 | 1.4E+08  | 1.4E+08  | 1275 | 1236 | 1.4E+08  | 0.240782 | 0.001198 | 0 |
| chr9 | 1.4E+08  | 1.4E+08  | 1110 | 1022 | 1.4E+08  | 0.315128 | 3.68E-05 | 0 |
| chr9 | 1.4E+08  | 1.4E+08  | 987  | 954  | 1.4E+08  | 0.245024 | 0.001003 | 0 |
| chr9 | 1.4E+08  | 1.4E+08  | 1107 | 1055 | 1.4E+08  | 0.265375 | 0.000413 | 0 |
| chr9 | 1.4E+08  | 1.4E+08  | 1172 | 1088 | 1.4E+08  | 0.303257 | 6.76E-05 | 0 |
| chr9 | 1.4E+08  | 1.4E+08  | 1220 | 1135 | 1.4E+08  | 0.300152 | 7.90E-05 | 0 |
| chr9 | 1.4E+08  | 1.4E+08  | 1380 | 1233 | 1.4E+08  | 0.358459 | 3.38E-06 | 0 |
| chr9 | 1.4E+08  | 1.4E+08  | 1295 | 1171 | 1.4E+08  | 0.341174 | 9.04E-06 | 0 |
| chr9 | 1.4E+08  | 1.4E+08  | 1069 | 1001 | 1.40E+08 | 0.290783 | 0.000125 | 0 |
| chr9 | 1.4E+08  | 1.4E+08  | 1238 | 1162 | 1.4E+08  | 0.287364 | 0.000148 | 0 |
| chr9 | 1.4E+08  | 1.4E+08  | 1369 | 1286 | 1.4E+08  | 0.286195 | 0.000157 | 0 |
| chr9 | 1.4E+08  | 1.4E+08  | 1282 | 1120 | 1.4E+08  | 0.390861 | 4.80E-07 | 0 |
| chr9 | 1.4E+08  | 1.4E+08  | 1162 | 1040 | 1.4E+08  | 0.35599  | 3.90E-06 | 0 |
| chr9 | 1.4E+08  | 1.4E+08  | 1222 | 1125 | 1.4E+08  | 0.315282 | 3.65E-05 | 0 |



|      |          |          |      |      |          |          |          |   |
|------|----------|----------|------|------|----------|----------|----------|---|
| chr9 | 1.4E+08  | 1.4E+08  | 1092 | 1046 | 1.4E+08  | 0.258053 | 0.000572 | 0 |
| chr9 | 1.41E+08 | 1.41E+08 | 9    | 8    | 1.41E+08 | 0.365888 | 2.19E-06 | 0 |
| chr9 | 900001   | 1000000  | 915  | 947  | 950000   | 0.14637  | 0.032276 | 0 |
| chr9 | 1100001  | 1200000  | 587  | 743  | 1150000  | -0.14404 | 0.035405 | 0 |
| chr9 | 1200001  | 1300000  | 652  | 845  | 1250000  | -0.17812 | 0.012876 | 0 |
| chr9 | 1550001  | 1650000  | 560  | 729  | 1600000  | -0.18453 | 0.010462 | 0 |
| chr9 | 1600001  | 1700000  | 661  | 858  | 1650000  | -0.18036 | 0.011979 | 0 |
| chr9 | 1650001  | 1750000  | 696  | 894  | 1700000  | -0.16522 | 0.019223 | 0 |
| chr9 | 1800001  | 1900000  | 709  | 894  | 1850000  | -0.13853 | 0.041101 | 0 |
| chr9 | 2050001  | 2150000  | 915  | 935  | 2100000  | 0.164768 | 0.018745 | 0 |
| chr9 | 2300001  | 2400000  | 729  | 916  | 2350000  | -0.13347 | 0.046969 | 0 |
| chr9 | 2750001  | 2850000  | 948  | 990  | 2800000  | 0.133422 | 0.046001 | 0 |
| chr9 | 3650001  | 3750000  | 711  | 910  | 3700000  | -0.16005 | 0.022435 | 0 |
| chr9 | 5450001  | 5550000  | 750  | 958  | 5500000  | -0.15717 | 0.024416 | 0 |
| chr9 | 5500001  | 5600000  | 818  | 1040 | 5550000  | -0.15045 | 0.029617 | 0 |
| chr9 | 7350001  | 7450000  | 691  | 894  | 7400000  | -0.17563 | 0.013936 | 0 |
| chr9 | 7850001  | 7950000  | 613  | 776  | 7900000  | -0.14421 | 0.035242 | 0 |
| chr9 | 8300001  | 8400000  | 600  | 780  | 8350000  | -0.18255 | 0.011161 | 0 |
| chr9 | 8800001  | 8900000  | 661  | 843  | 8850000  | -0.15492 | 0.026065 | 0 |
| chr9 | 8850001  | 8950000  | 582  | 756  | 8900000  | -0.1814  | 0.011584 | 0 |
| chr9 | 8900001  | 9000000  | 570  | 735  | 8950000  | -0.17082 | 0.016198 | 0 |
| chr9 | 8950001  | 9050000  | 632  | 807  | 9.00E+06 | -0.15668 | 0.024768 | 0 |
| chr9 | 9350001  | 9450000  | 582  | 750  | 9400000  | -0.16991 | 0.016661 | 0 |
| chr9 | 9500001  | 9600000  | 616  | 776  | 9550000  | -0.13716 | 0.04262  | 0 |
| chr9 | 10350001 | 10450000 | 609  | 784  | 10400000 | -0.16845 | 0.017426 | 0 |
| chr9 | 10650001 | 10750000 | 592  | 756  | 10700000 | -0.15683 | 0.024663 | 0 |
| chr9 | 10700001 | 10800000 | 547  | 688  | 10750000 | -0.1349  | 0.045236 | 0 |
| chr9 | 10850001 | 10950000 | 582  | 757  | 10900000 | -0.18331 | 0.010887 | 0 |
| chr9 | 11000001 | 11100000 | 636  | 828  | 11050000 | -0.18464 | 0.010424 | 0 |
| chr9 | 11150001 | 11250000 | 594  | 747  | 11200000 | -0.13468 | 0.0455   | 0 |
| chr9 | 11200001 | 11300000 | 545  | 697  | 11250000 | -0.15894 | 0.023185 | 0 |
| chr9 | 11500001 | 11600000 | 591  | 754  | 11550000 | -0.15544 | 0.025673 | 0 |
| chr9 | 11650001 | 11750000 | 542  | 703  | 11700000 | -0.17927 | 0.012409 | 0 |
| chr9 | 11700001 | 11800000 | 541  | 698  | 11750000 | -0.17164 | 0.015793 | 0 |
| chr9 | 11800001 | 11900000 | 540  | 680  | 11850000 | -0.13661 | 0.043246 | 0 |
| chr9 | 11950001 | 12050000 | 605  | 770  | 1.20E+07 | -0.15196 | 0.028373 | 0 |
| chr9 | 12200001 | 12300000 | 615  | 774  | 12250000 | -0.13578 | 0.044202 | 0 |
| chr9 | 12850001 | 12950000 | 629  | 808  | 12900000 | -0.16533 | 0.01916  | 0 |
| chr9 | 12900001 | 13000000 | 626  | 793  | 12950000 | -0.1452  | 0.034296 | 0 |
| chr9 | 13050001 | 13150000 | 677  | 856  | 13100000 | -0.14249 | 0.036933 | 0 |
| chr9 | 13100001 | 13200000 | 674  | 861  | 13150000 | -0.1573  | 0.024324 | 0 |
| chr9 | 13700001 | 13800000 | 681  | 878  | 13750000 | -0.1706  | 0.016307 | 0 |
| chr9 | 13750001 | 13850000 | 728  | 921  | 13800000 | -0.1433  | 0.036128 | 0 |
| chr9 | 13800001 | 13900000 | 745  | 943  | 13850000 | -0.14405 | 0.03539  | 0 |
| chr9 | 15050001 | 15150000 | 610  | 793  | 15100000 | -0.18255 | 0.011161 | 0 |
| chr9 | 15500001 | 15600000 | 735  | 758  | 15550000 | 0.151509 | 0.027862 | 0 |
| chr9 | 15550001 | 15650000 | 561  | 579  | 15600000 | 0.1504   | 0.028769 | 0 |

|      |          |          |     |      |          |          |          |   |
|------|----------|----------|-----|------|----------|----------|----------|---|
| chr9 | 16050001 | 16150000 | 769 | 976  | 16100000 | -0.14793 | 0.031785 | 0 |
| chr9 | 16100001 | 16200000 | 829 | 1058 | 16150000 | -0.15593 | 0.025312 | 0 |
| chr9 | 17000001 | 17100000 | 690 | 895  | 17050000 | -0.17933 | 0.012385 | 0 |
| chr9 | 17700001 | 17800000 | 707 | 893  | 17750000 | -0.14099 | 0.038472 | 0 |
| chr9 | 17900001 | 18000000 | 673 | 863  | 17950000 | -0.16279 | 0.020682 | 0 |
| chr9 | 17950001 | 18050000 | 747 | 939  | 1.80E+07 | -0.13405 | 0.046254 | 0 |
| chr9 | 18800001 | 18900000 | 718 | 920  | 18850000 | -0.16169 | 0.021375 | 0 |
| chr9 | 18850001 | 18950000 | 776 | 982  | 18900000 | -0.1437  | 0.035732 | 0 |
| chr9 | 19050001 | 19150000 | 806 | 826  | 19100000 | 0.160601 | 0.021288 | 0 |
| chr9 | 19400001 | 19500000 | 923 | 942  | 19450000 | 0.166567 | 0.01773  | 0 |
| chr9 | 21750001 | 21850000 | 967 | 1008 | 21800000 | 0.136055 | 0.042882 | 0 |
| chr9 | 21900001 | 22000000 | 939 | 975  | 21950000 | 0.141686 | 0.036788 | 0 |
| chr9 | 22550001 | 22650000 | 698 | 876  | 22600000 | -0.13174 | 0.049117 | 0 |
| chr9 | 22950001 | 23050000 | 619 | 806  | 2.30E+07 | -0.18488 | 0.010343 | 0 |
| chr9 | 23000001 | 23100000 | 580 | 747  | 23050000 | -0.16909 | 0.017085 | 0 |
| chr9 | 23050001 | 23150000 | 579 | 737  | 23100000 | -0.15214 | 0.028229 | 0 |
| chr9 | 23100001 | 23200000 | 654 | 844  | 23150000 | -0.17199 | 0.01562  | 0 |
| chr9 | 23250001 | 23350000 | 619 | 778  | 23300000 | -0.13387 | 0.04648  | 0 |
| chr9 | 23600001 | 23700000 | 660 | 844  | 23650000 | -0.15881 | 0.02327  | 0 |
| chr9 | 23650001 | 23750000 | 691 | 879  | 23700000 | -0.15121 | 0.028981 | 0 |
| chr9 | 23700001 | 23800000 | 702 | 882  | 23750000 | -0.13334 | 0.047118 | 0 |
| chr9 | 24150001 | 24250000 | 537 | 679  | 24200000 | -0.14253 | 0.036899 | 0 |
| chr9 | 24350001 | 24450000 | 592 | 746  | 24400000 | -0.13762 | 0.042111 | 0 |
| chr9 | 24600001 | 24700000 | 550 | 708  | 24650000 | -0.16835 | 0.017476 | 0 |
| chr9 | 24850001 | 24950000 | 553 | 708  | 24900000 | -0.16051 | 0.022137 | 0 |
| chr9 | 25150001 | 25250000 | 578 | 750  | 25200000 | -0.17986 | 0.012176 | 0 |
| chr9 | 25300001 | 25400000 | 596 | 755  | 25350000 | -0.1452  | 0.034291 | 0 |
| chr9 | 25350001 | 25450000 | 624 | 785  | 25400000 | -0.13518 | 0.044906 | 0 |
| chr9 | 25450001 | 25550000 | 626 | 810  | 25500000 | -0.1758  | 0.013861 | 0 |
| chr9 | 25500001 | 25600000 | 649 | 825  | 25550000 | -0.15021 | 0.029814 | 0 |
| chr9 | 25800001 | 25900000 | 614 | 795  | 25850000 | -0.17675 | 0.013447 | 0 |
| chr9 | 26050001 | 26150000 | 659 | 832  | 26100000 | -0.14034 | 0.039148 | 0 |
| chr9 | 26600001 | 26700000 | 712 | 925  | 26650000 | -0.18161 | 0.011505 | 0 |
| chr9 | 27950001 | 28050000 | 740 | 957  | 2.80E+07 | -0.17503 | 0.0142   | 0 |
| chr9 | 28050001 | 28150000 | 616 | 802  | 28100000 | -0.18471 | 0.0104   | 0 |
| chr9 | 28100001 | 28200000 | 637 | 823  | 28150000 | -0.17364 | 0.014837 | 0 |
| chr9 | 28850001 | 28950000 | 836 | 872  | 28900000 | 0.135138 | 0.043949 | 0 |
| chr9 | 29400001 | 29500000 | 636 | 799  | 29450000 | -0.13321 | 0.047288 | 0 |
| chr9 | 29750001 | 29850000 | 644 | 827  | 29800000 | -0.16486 | 0.019434 | 0 |
| chr9 | 29800001 | 29900000 | 640 | 821  | 29850000 | -0.16335 | 0.020341 | 0 |
| chr9 | 30200001 | 30300000 | 606 | 772  | 30250000 | -0.15332 | 0.027292 | 0 |
| chr9 | 30500001 | 30600000 | 516 | 672  | 30550000 | -0.18513 | 0.010258 | 0 |
| chr9 | 30550001 | 30650000 | 548 | 710  | 30600000 | -0.17768 | 0.013056 | 0 |
| chr9 | 30650001 | 30750000 | 628 | 805  | 30700000 | -0.16226 | 0.021012 | 0 |
| chr9 | 31300001 | 31400000 | 548 | 703  | 31350000 | -0.16339 | 0.020317 | 0 |
| chr9 | 31700001 | 31800000 | 610 | 792  | 31750000 | -0.18073 | 0.01184  | 0 |
| chr9 | 31850001 | 31950000 | 539 | 702  | 31900000 | -0.18522 | 0.010226 | 0 |

|      |          |          |      |      |          |          |          |   |
|------|----------|----------|------|------|----------|----------|----------|---|
| chr9 | 32950001 | 33050000 | 913  | 951  | 3.30E+07 | 0.137133 | 0.041657 | 0 |
| chr9 | 33050001 | 33150000 | 970  | 983  | 33100000 | 0.176756 | 0.012825 | 0 |
| chr9 | 33200001 | 33300000 | 1143 | 1164 | 33250000 | 0.169697 | 0.016076 | 0 |
| chr9 | 33750001 | 33850000 | 601  | 612  | 33800000 | 0.169796 | 0.016026 | 0 |
| chr9 | 33800001 | 33900000 | 751  | 779  | 33850000 | 0.143153 | 0.035323 | 0 |
| chr9 | 33900001 | 34000000 | 925  | 963  | 33950000 | 0.137881 | 0.040823 | 0 |
| chr9 | 34550001 | 34650000 | 1175 | 1224 | 34600000 | 0.13702  | 0.041783 | 0 |
| chr9 | 34600001 | 34700000 | 1089 | 1114 | 34650000 | 0.163218 | 0.019659 | 0 |
| chr9 | 35000001 | 35100000 | 880  | 911  | 35050000 | 0.146016 | 0.032601 | 0 |
| chr9 | 35050001 | 35150000 | 937  | 972  | 35100000 | 0.143056 | 0.035418 | 0 |
| chr9 | 35650001 | 35750000 | 1172 | 1206 | 35700000 | 0.154706 | 0.02538  | 0 |
| chr9 | 35700001 | 35800000 | 1202 | 1231 | 35750000 | 0.161569 | 0.020672 | 0 |
| chr9 | 35750001 | 35850000 | 1198 | 1226 | 35800000 | 0.162632 | 0.020014 | 0 |
| chr9 | 35900001 | 36000000 | 956  | 988  | 35950000 | 0.148463 | 0.030414 | 0 |
| chr9 | 36150001 | 36250000 | 906  | 943  | 36200000 | 0.138216 | 0.040453 | 0 |
| chr9 | 36550001 | 36650000 | 779  | 791  | 36600000 | 0.173909 | 0.014061 | 0 |
| chr9 | 37000001 | 37100000 | 896  | 932  | 37050000 | 0.139132 | 0.039458 | 0 |
| chr9 | 37400001 | 37500000 | 962  | 996  | 37450000 | 0.145854 | 0.032749 | 0 |
| chr9 | 37500001 | 37600000 | 975  | 1003 | 37550000 | 0.155116 | 0.025076 | 0 |
| chr9 | 37750001 | 37850000 | 888  | 928  | 37800000 | 0.132398 | 0.047261 | 0 |
| chr9 | 37900001 | 38000000 | 1093 | 1133 | 37950000 | 0.144109 | 0.034394 | 0 |
| chr9 | 37950001 | 38050000 | 1122 | 1149 | 3.80E+07 | 0.161657 | 0.020617 | 0 |
| chr9 | 38050001 | 38150000 | 1031 | 1076 | 38100000 | 0.134329 | 0.044906 | 0 |
| chr9 | 38200001 | 38300000 | 792  | 1017 | 38250000 | -0.16478 | 0.01948  | 0 |
| chr9 | 39000001 | 39100000 | 41   | 53   | 39050000 | -0.17441 | 0.014483 | 0 |
| chr9 | 39150001 | 39250000 | 30   | 38   | 39200000 | -0.14507 | 0.034411 | 0 |
| chr9 | 44150001 | 44250000 | 54   | 56   | 44200000 | 0.143496 | 0.034987 | 0 |
| chr9 | 65600001 | 65700000 | 7    | 9    | 65650000 | -0.16661 | 0.018434 | 0 |
| chr9 | 66500001 | 66600000 | 53   | 68   | 66550000 | -0.16358 | 0.0202   | 0 |
| chr9 | 66750001 | 66850000 | 343  | 439  | 66800000 | -0.16005 | 0.022438 | 0 |
| chr9 | 68950001 | 69050000 | 138  | 144  | 6.90E+07 | 0.134562 | 0.044628 | 0 |
| chr9 | 69900001 | 70000000 | 42   | 54   | 69950000 | -0.16661 | 0.018434 | 0 |
| chr9 | 71200001 | 71300000 | 473  | 603  | 71250000 | -0.15435 | 0.026493 | 0 |
| chr9 | 71300001 | 71400000 | 641  | 660  | 71350000 | 0.153821 | 0.026048 | 0 |
| chr9 | 71750001 | 71850000 | 575  | 597  | 71800000 | 0.141794 | 0.036678 | 0 |
| chr9 | 72250001 | 72350000 | 558  | 720  | 72300000 | -0.17177 | 0.015728 | 0 |
| chr9 | 72750001 | 72850000 | 465  | 588  | 72800000 | -0.14262 | 0.036802 | 0 |
| chr9 | 73050001 | 73150000 | 643  | 649  | 73100000 | 0.182563 | 0.010594 | 0 |
| chr9 | 74450001 | 74550000 | 601  | 621  | 74500000 | 0.148735 | 0.030178 | 0 |
| chr9 | 74700001 | 74800000 | 591  | 613  | 74750000 | 0.143234 | 0.035243 | 0 |
| chr9 | 74950001 | 75050000 | 565  | 588  | 7.50E+07 | 0.138398 | 0.040254 | 0 |
| chr9 | 75300001 | 75400000 | 488  | 613  | 75350000 | -0.13304 | 0.047489 | 0 |
| chr9 | 75700001 | 75800000 | 620  | 648  | 75750000 | 0.132237 | 0.047461 | 0 |
| chr9 | 76200001 | 76300000 | 466  | 590  | 76250000 | -0.14442 | 0.035034 | 0 |
| chr9 | 76250001 | 76350000 | 459  | 584  | 76300000 | -0.15151 | 0.028738 | 0 |
| chr9 | 76300001 | 76400000 | 470  | 608  | 76350000 | -0.17545 | 0.014015 | 0 |
| chr9 | 76700001 | 76800000 | 398  | 501  | 76750000 | -0.13608 | 0.04386  | 0 |

|      |          |          |     |     |          |          |          |   |
|------|----------|----------|-----|-----|----------|----------|----------|---|
| chr9 | 78450001 | 78550000 | 464 | 591 | 78500000 | -0.15307 | 0.027488 | 0 |
| chr9 | 78550001 | 78650000 | 473 | 604 | 78600000 | -0.15675 | 0.024721 | 0 |
| chr9 | 79600001 | 79700000 | 518 | 535 | 79650000 | 0.149376 | 0.029629 | 0 |
| chr9 | 79950001 | 80050000 | 486 | 494 | 8.00E+07 | 0.172408 | 0.014752 | 0 |
| chr9 | 80750001 | 80850000 | 441 | 573 | 80800000 | -0.18179 | 0.011438 | 0 |
| chr9 | 80800001 | 80900000 | 520 | 653 | 80850000 | -0.13261 | 0.048027 | 0 |
| chr9 | 81100001 | 81200000 | 502 | 635 | 81150000 | -0.14311 | 0.03632  | 0 |
| chr9 | 81850001 | 81950000 | 506 | 653 | 81900000 | -0.17198 | 0.015623 | 0 |
| chr9 | 81900001 | 82000000 | 471 | 610 | 81950000 | -0.17712 | 0.013291 | 0 |
| chr9 | 82750001 | 82850000 | 386 | 498 | 82800000 | -0.17158 | 0.015819 | 0 |
| chr9 | 83000001 | 83100000 | 387 | 501 | 83050000 | -0.17651 | 0.013549 | 0 |
| chr9 | 83600001 | 83700000 | 417 | 530 | 83650000 | -0.14998 | 0.030009 | 0 |
| chr9 | 83650001 | 83750000 | 438 | 563 | 83700000 | -0.16624 | 0.01864  | 0 |
| chr9 | 83850001 | 83950000 | 409 | 523 | 83900000 | -0.15875 | 0.023316 | 0 |
| chr9 | 83900001 | 84000000 | 416 | 529 | 83950000 | -0.15072 | 0.029389 | 0 |
| chr9 | 84500001 | 84600000 | 278 | 361 | 84550000 | -0.18095 | 0.011755 | 0 |
| chr9 | 84650001 | 84750000 | 418 | 542 | 84700000 | -0.17883 | 0.012586 | 0 |
| chr9 | 84800001 | 84900000 | 393 | 495 | 84850000 | -0.13694 | 0.042877 | 0 |
| chr9 | 84850001 | 84950000 | 409 | 524 | 84900000 | -0.1615  | 0.021492 | 0 |
| chr9 | 85000001 | 85100000 | 407 | 521 | 85050000 | -0.16029 | 0.022278 | 0 |
| chr9 | 85300001 | 85400000 | 384 | 493 | 85350000 | -0.16452 | 0.019637 | 0 |
| chr9 | 85900001 | 86000000 | 472 | 596 | 85950000 | -0.14056 | 0.038916 | 0 |
| chr9 | 86150001 | 86250000 | 543 | 558 | 86200000 | 0.15665  | 0.023963 | 0 |
| chr9 | 86200001 | 86300000 | 589 | 606 | 86250000 | 0.154913 | 0.025226 | 0 |
| chr9 | 86500001 | 86600000 | 443 | 448 | 86550000 | 0.179771 | 0.011621 | 0 |
| chr9 | 86600001 | 86700000 | 479 | 607 | 86650000 | -0.14571 | 0.033814 | 0 |
| chr9 | 87150001 | 87250000 | 466 | 589 | 87200000 | -0.14197 | 0.037456 | 0 |
| chr9 | 87200001 | 87300000 | 454 | 570 | 87250000 | -0.13231 | 0.048404 | 0 |
| chr9 | 87350001 | 87450000 | 465 | 592 | 87400000 | -0.1524  | 0.028017 | 0 |
| chr9 | 87500001 | 87600000 | 459 | 590 | 87550000 | -0.16626 | 0.01863  | 0 |
| chr9 | 87550001 | 87650000 | 485 | 622 | 87600000 | -0.16297 | 0.020574 | 0 |
| chr9 | 87600001 | 87700000 | 449 | 575 | 87650000 | -0.16088 | 0.021891 | 0 |
| chr9 | 88900001 | 89000000 | 563 | 577 | 88950000 | 0.160527 | 0.021336 | 0 |
| chr9 | 89100001 | 89200000 | 611 | 631 | 89150000 | 0.149495 | 0.029528 | 0 |
| chr9 | 90000001 | 90100000 | 528 | 539 | 90050000 | 0.166216 | 0.017925 | 0 |
| chr9 | 90150001 | 90250000 | 556 | 698 | 90200000 | -0.13218 | 0.048564 | 0 |
| chr9 | 90250001 | 90350000 | 671 | 690 | 90300000 | 0.155679 | 0.024662 | 0 |
| chr9 | 90950001 | 91050000 | 495 | 506 | 9.10E+07 | 0.164254 | 0.019044 | 0 |
| chr9 | 91450001 | 91550000 | 456 | 589 | 91500000 | -0.17327 | 0.015008 | 0 |
| chr9 | 91500001 | 91600000 | 471 | 613 | 91550000 | -0.1842  | 0.010576 | 0 |
| chr9 | 91650001 | 91750000 | 500 | 628 | 91700000 | -0.13287 | 0.047698 | 0 |
| chr9 | 91850001 | 91950000 | 554 | 562 | 91900000 | 0.175279 | 0.013454 | 0 |
| chr9 | 92200001 | 92300000 | 713 | 724 | 92250000 | 0.173875 | 0.014076 | 0 |
| chr9 | 92250001 | 92350000 | 628 | 643 | 92300000 | 0.161909 | 0.02046  | 0 |
| chr9 | 92500001 | 92600000 | 178 | 228 | 92550000 | -0.16119 | 0.021691 | 0 |
| chr9 | 94800001 | 94900000 | 779 | 796 | 94850000 | 0.164818 | 0.018716 | 0 |
| chr9 | 95350001 | 95450000 | 974 | 995 | 95400000 | 0.165188 | 0.018504 | 0 |

|      |          |          |      |      |          |          |          |   |
|------|----------|----------|------|------|----------|----------|----------|---|
| chr9 | 95600001 | 95700000 | 724  | 754  | 95650000 | 0.137388 | 0.04137  | 0 |
| chr9 | 95900001 | 96000000 | 1093 | 1136 | 95950000 | 0.140294 | 0.038225 | 0 |
| chr9 | 95950001 | 96050000 | 1110 | 1149 | 9.60E+07 | 0.146144 | 0.032483 | 0 |
| chr9 | 96150001 | 96250000 | 988  | 1026 | 96200000 | 0.141515 | 0.036962 | 0 |
| chr9 | 96200001 | 96300000 | 976  | 1019 | 96250000 | 0.133762 | 0.045588 | 0 |
| chr9 | 96850001 | 96950000 | 875  | 914  | 96900000 | 0.133052 | 0.046453 | 0 |
| chr9 | 97050001 | 97150000 | 204  | 257  | 97100000 | -0.13724 | 0.042537 | 0 |
| chr9 | 97600001 | 97700000 | 1017 | 1038 | 97650000 | 0.166476 | 0.01778  | 0 |
| chr9 | 97750001 | 97850000 | 1065 | 1101 | 97800000 | 0.148002 | 0.030816 | 0 |
| chr9 | 97800001 | 97900000 | 1094 | 1138 | 97850000 | 0.139075 | 0.039519 | 0 |
| chr9 | 98400001 | 98500000 | 784  | 998  | 98450000 | -0.15222 | 0.028161 | 0 |
| chr9 | 99100001 | 99200000 | 835  | 846  | 99150000 | 0.177082 | 0.01269  | 0 |
| chr9 | 99300001 | 99400000 | 884  | 908  | 99350000 | 0.157317 | 0.023492 | 0 |
| chr9 | 99350001 | 99450000 | 846  | 859  | 99400000 | 0.173963 | 0.014036 | 0 |
| chr9 | 99650001 | 99750000 | 134  | 139  | 99700000 | 0.143111 | 0.035364 | 0 |
| chr9 | 99850001 | 99950000 | 357  | 452  | 99900000 | -0.14444 | 0.035021 | 0 |
| chr9 | 1.02E+08 | 1.02E+08 | 857  | 1082 | 1.02E+08 | -0.14037 | 0.039118 | 0 |
| chr9 | 1.03E+08 | 1.03E+08 | 858  | 896  | 1.03E+08 | 0.133442 | 0.045976 | 0 |
| chr9 | 1.03E+08 | 1.03E+08 | 929  | 963  | 1.03E+08 | 0.144106 | 0.034396 | 0 |
| chr9 | 1.04E+08 | 1.04E+08 | 887  | 895  | 1.04E+08 | 0.183009 | 0.010438 | 0 |
| chr9 | 1.05E+08 | 1.05E+08 | 536  | 683  | 1.05E+08 | -0.15369 | 0.027004 | 0 |
| chr9 | 1.05E+08 | 1.05E+08 | 616  | 781  | 1.05E+08 | -0.14643 | 0.033145 | 0 |
| chr9 | 1.05E+08 | 1.05E+08 | 575  | 734  | 1.05E+08 | -0.15626 | 0.025076 | 0 |
| chr9 | 1.05E+08 | 1.06E+08 | 598  | 752  | 1.05E+08 | -0.13462 | 0.04557  | 0 |
| chr9 | 1.05E+08 | 1.06E+08 | 592  | 761  | 1.06E+08 | -0.16634 | 0.018586 | 0 |
| chr9 | 1.06E+08 | 1.06E+08 | 582  | 738  | 1.06E+08 | -0.14664 | 0.032953 | 0 |
| chr9 | 1.06E+08 | 1.06E+08 | 558  | 721  | 1.06E+08 | -0.17377 | 0.014774 | 0 |
| chr9 | 1.06E+08 | 1.06E+08 | 627  | 789  | 1.06E+08 | -0.1356  | 0.044421 | 0 |
| chr9 | 1.06E+08 | 1.06E+08 | 611  | 778  | 1.06E+08 | -0.15263 | 0.027832 | 0 |
| chr9 | 1.06E+08 | 1.06E+08 | 577  | 742  | 1.06E+08 | -0.16688 | 0.018279 | 0 |
| chr9 | 1.06E+08 | 1.06E+08 | 620  | 785  | 1.06E+08 | -0.14446 | 0.034996 | 0 |
| chr9 | 1.06E+08 | 1.06E+08 | 616  | 780  | 1.06E+08 | -0.14458 | 0.034882 | 0 |
| chr9 | 1.07E+08 | 1.07E+08 | 630  | 817  | 1.07E+08 | -0.17902 | 0.012508 | 0 |
| chr9 | 1.08E+08 | 1.08E+08 | 727  | 921  | 1.08E+08 | -0.14528 | 0.034214 | 0 |
| chr9 | 1.08E+08 | 1.08E+08 | 715  | 923  | 1.08E+08 | -0.17242 | 0.01541  | 0 |
| chr9 | 1.08E+08 | 1.08E+08 | 814  | 845  | 1.08E+08 | 0.14204  | 0.036429 | 0 |
| chr9 | 1.09E+08 | 1.09E+08 | 609  | 771  | 1.09E+08 | -0.14433 | 0.035127 | 0 |
| chr9 | 1.09E+08 | 1.09E+08 | 644  | 821  | 1.09E+08 | -0.15436 | 0.02649  | 0 |
| chr9 | 1.1E+08  | 1.1E+08  | 718  | 905  | 1.1E+08  | -0.13797 | 0.041715 | 0 |
| chr9 | 1.1E+08  | 1.1E+08  | 823  | 1035 | 1.1E+08  | -0.1347  | 0.045475 | 0 |
| chr9 | 1.1E+08  | 1.1E+08  | 790  | 1016 | 1.1E+08  | -0.16701 | 0.018207 | 0 |
| chr9 | 1.11E+08 | 1.11E+08 | 792  | 820  | 1.11E+08 | 0.14584  | 0.032763 | 0 |
| chr9 | 1.12E+08 | 1.12E+08 | 915  | 948  | 1.12E+08 | 0.144848 | 0.033689 | 0 |
| chr9 | 1.12E+08 | 1.12E+08 | 912  | 945  | 1.12E+08 | 0.144683 | 0.033846 | 0 |
| chr9 | 1.12E+08 | 1.12E+08 | 899  | 918  | 1.12E+08 | 0.16579  | 0.018163 | 0 |
| chr9 | 1.13E+08 | 1.13E+08 | 836  | 1057 | 1.13E+08 | -0.14244 | 0.036988 | 0 |
| chr9 | 1.13E+08 | 1.13E+08 | 783  | 1015 | 1.13E+08 | -0.17843 | 0.012746 | 0 |

|      |          |          |      |      |          |          |          |   |
|------|----------|----------|------|------|----------|----------|----------|---|
| chr9 | 1.13E+08 | 1.13E+08 | 779  | 979  | 1.13E+08 | -0.13372 | 0.046656 | 0 |
| chr9 | 1.13E+08 | 1.13E+08 | 767  | 989  | 1.13E+08 | -0.17078 | 0.016217 | 0 |
| chr9 | 1.13E+08 | 1.13E+08 | 770  | 967  | 1.13E+08 | -0.13269 | 0.04792  | 0 |
| chr9 | 1.15E+08 | 1.16E+08 | 856  | 895  | 1.15E+08 | 0.131686 | 0.048154 | 0 |
| chr9 | 1.17E+08 | 1.17E+08 | 1125 | 1177 | 1.17E+08 | 0.130774 | 0.049318 | 0 |
| chr9 | 1.17E+08 | 1.17E+08 | 907  | 917  | 1.17E+08 | 0.180144 | 0.011479 | 0 |
| chr9 | 1.18E+08 | 1.18E+08 | 742  | 940  | 1.18E+08 | -0.14528 | 0.034218 | 0 |
| chr9 | 1.19E+08 | 1.19E+08 | 868  | 1091 | 1.19E+08 | -0.13392 | 0.046415 | 0 |
| chr9 | 1.2E+08  | 1.2E+08  | 736  | 924  | 1.2E+08  | -0.13222 | 0.048508 | 0 |
| chr9 | 1.2E+08  | 1.2E+08  | 744  | 941  | 1.2E+08  | -0.14293 | 0.036496 | 0 |
| chr9 | 1.2E+08  | 1.2E+08  | 700  | 894  | 1.2E+08  | -0.15696 | 0.02457  | 0 |
| chr9 | 1.21E+08 | 1.21E+08 | 743  | 933  | 1.21E+08 | -0.13255 | 0.048098 | 0 |
| chr9 | 1.21E+08 | 1.21E+08 | 688  | 887  | 1.21E+08 | -0.17056 | 0.016327 | 0 |
| chr9 | 1.21E+08 | 1.21E+08 | 697  | 894  | 1.21E+08 | -0.16315 | 0.020459 | 0 |
| chr9 | 1.21E+08 | 1.21E+08 | 694  | 893  | 1.21E+08 | -0.16776 | 0.017796 | 0 |
| chr9 | 1.21E+08 | 1.21E+08 | 628  | 812  | 1.21E+08 | -0.17475 | 0.014326 | 0 |
| chr9 | 1.21E+08 | 1.21E+08 | 723  | 922  | 1.21E+08 | -0.15481 | 0.026149 | 0 |
| chr9 | 1.21E+08 | 1.22E+08 | 717  | 922  | 1.21E+08 | -0.16683 | 0.018309 | 0 |
| chr9 | 1.21E+08 | 1.22E+08 | 720  | 931  | 1.22E+08 | -0.17482 | 0.014294 | 0 |
| chr9 | 1.22E+08 | 1.22E+08 | 662  | 856  | 1.22E+08 | -0.17482 | 0.014297 | 0 |
| chr9 | 1.22E+08 | 1.22E+08 | 722  | 924  | 1.22E+08 | -0.15993 | 0.022517 | 0 |
| chr9 | 1.22E+08 | 1.22E+08 | 684  | 879  | 1.22E+08 | -0.1659  | 0.018832 | 0 |
| chr9 | 1.22E+08 | 1.22E+08 | 729  | 949  | 1.22E+08 | -0.18453 | 0.010463 | 0 |
| chr9 | 1.22E+08 | 1.22E+08 | 707  | 905  | 1.22E+08 | -0.16024 | 0.022309 | 0 |
| chr9 | 1.23E+08 | 1.23E+08 | 951  | 965  | 1.23E+08 | 0.174879 | 0.013628 | 0 |
| chr9 | 1.24E+08 | 1.24E+08 | 785  | 987  | 1.24E+08 | -0.13439 | 0.045844 | 0 |
| chr9 | 1.24E+08 | 1.24E+08 | 882  | 906  | 1.24E+08 | 0.157231 | 0.023553 | 0 |
| chr9 | 1.24E+08 | 1.24E+08 | 1047 | 1093 | 1.24E+08 | 0.133931 | 0.045384 | 0 |
| chr9 | 1.25E+08 | 1.25E+08 | 1023 | 1037 | 1.25E+08 | 0.176353 | 0.012994 | 0 |
| chr9 | 1.25E+08 | 1.25E+08 | 1067 | 1111 | 1.25E+08 | 0.137664 | 0.041063 | 0 |
| chr9 | 1.26E+08 | 1.26E+08 | 805  | 832  | 1.26E+08 | 0.148368 | 0.030496 | 0 |
| chr9 | 1.26E+08 | 1.26E+08 | 840  | 878  | 1.26E+08 | 0.132131 | 0.047594 | 0 |
| chr9 | 1.26E+08 | 1.26E+08 | 869  | 905  | 1.26E+08 | 0.137401 | 0.041356 | 0 |
| chr9 | 1.27E+08 | 1.27E+08 | 880  | 916  | 1.27E+08 | 0.138119 | 0.04056  | 0 |
| chr9 | 1.27E+08 | 1.27E+08 | 867  | 903  | 1.27E+08 | 0.137269 | 0.041504 | 0 |
| chr9 | 1.27E+08 | 1.28E+08 | 1014 | 1046 | 1.27E+08 | 0.151138 | 0.028163 | 0 |
| chr9 | 1.27E+08 | 1.28E+08 | 992  | 1015 | 1.28E+08 | 0.162895 | 0.019854 | 0 |
| chr9 | 1.28E+08 | 1.28E+08 | 991  | 1027 | 1.28E+08 | 0.144484 | 0.034035 | 0 |
| chr9 | 1.28E+08 | 1.28E+08 | 912  | 948  | 1.28E+08 | 0.14011  | 0.038418 | 0 |
| chr9 | 1.28E+08 | 1.28E+08 | 842  | 881  | 1.28E+08 | 0.130641 | 0.049488 | 0 |
| chr9 | 1.28E+08 | 1.28E+08 | 977  | 1005 | 1.28E+08 | 0.155198 | 0.025015 | 0 |
| chr9 | 1.29E+08 | 1.29E+08 | 1027 | 1055 | 1.29E+08 | 0.157156 | 0.023605 | 0 |
| chr9 | 1.29E+08 | 1.29E+08 | 1030 | 1053 | 1.29E+08 | 0.164102 | 0.019133 | 0 |
| chr9 | 1.3E+08  | 1.3E+08  | 1000 | 1028 | 1.3E+08  | 0.156123 | 0.024341 | 0 |
| chr9 | 1.3E+08  | 1.3E+08  | 978  | 997  | 1.3E+08  | 0.168204 | 0.016848 | 0 |
| chr9 | 1.3E+08  | 1.31E+08 | 1054 | 1099 | 1.3E+08  | 0.135647 | 0.043355 | 0 |
| chr9 | 1.31E+08 | 1.31E+08 | 1107 | 1141 | 1.31E+08 | 0.152319 | 0.027215 | 0 |

|      |          |          |      |      |          |          |          |   |
|------|----------|----------|------|------|----------|----------|----------|---|
| chr9 | 1.31E+08 | 1.31E+08 | 1021 | 1068 | 1.31E+08 | 0.131034 | 0.048983 | 0 |
| chr9 | 1.31E+08 | 1.31E+08 | 996  | 1038 | 1.31E+08 | 0.136374 | 0.042516 | 0 |
| chr9 | 1.31E+08 | 1.31E+08 | 874  | 895  | 1.31E+08 | 0.161709 | 0.020585 | 0 |
| chr9 | 1.31E+08 | 1.32E+08 | 903  | 923  | 1.32E+08 | 0.164358 | 0.018983 | 0 |
| chr9 | 1.32E+08 | 1.32E+08 | 979  | 1013 | 1.32E+08 | 0.14671  | 0.031968 | 0 |
| chr9 | 1.32E+08 | 1.32E+08 | 1190 | 1213 | 1.32E+08 | 0.168345 | 0.016774 | 0 |
| chr9 | 1.33E+08 | 1.33E+08 | 818  | 856  | 1.33E+08 | 0.130453 | 0.049732 | 0 |
| chr9 | 1.33E+08 | 1.33E+08 | 915  | 926  | 1.33E+08 | 0.178723 | 0.012028 | 0 |
| chr9 | 1.33E+08 | 1.33E+08 | 1031 | 1074 | 1.33E+08 | 0.137013 | 0.041791 | 0 |
| chr9 | 1.33E+08 | 1.34E+08 | 958  | 986  | 1.33E+08 | 0.154401 | 0.025608 | 0 |
| chr9 | 1.33E+08 | 1.34E+08 | 1053 | 1070 | 1.34E+08 | 0.172858 | 0.014542 | 0 |
| chr9 | 1.34E+08 | 1.34E+08 | 908  | 921  | 1.34E+08 | 0.175454 | 0.013378 | 0 |
| chr9 | 1.34E+08 | 1.34E+08 | 964  | 997  | 1.34E+08 | 0.147403 | 0.031346 | 0 |
| chr9 | 1.34E+08 | 1.34E+08 | 1094 | 1134 | 1.34E+08 | 0.144155 | 0.034349 | 0 |
| chr9 | 1.34E+08 | 1.34E+08 | 1179 | 1210 | 1.34E+08 | 0.15852  | 0.022664 | 0 |
| chr9 | 1.34E+08 | 1.34E+08 | 1143 | 1172 | 1.34E+08 | 0.159816 | 0.021798 | 0 |
| chr9 | 1.34E+08 | 1.34E+08 | 1077 | 1114 | 1.34E+08 | 0.147232 | 0.031498 | 0 |
| chr9 | 1.34E+08 | 1.34E+08 | 1014 | 1057 | 1.34E+08 | 0.136045 | 0.042894 | 0 |
| chr9 | 1.34E+08 | 1.34E+08 | 1102 | 1111 | 1.34E+08 | 0.184228 | 0.010021 | 0 |
| chr9 | 1.34E+08 | 1.34E+08 | 967  | 989  | 1.34E+08 | 0.163508 | 0.019485 | 0 |
| chr9 | 1.35E+08 | 1.35E+08 | 992  | 1002 | 1.35E+08 | 0.181493 | 0.010978 | 0 |
| chr9 | 1.35E+08 | 1.35E+08 | 1080 | 1107 | 1.35E+08 | 0.160339 | 0.021457 | 0 |
| chr9 | 1.35E+08 | 1.35E+08 | 905  | 1151 | 1.35E+08 | -0.15094 | 0.029211 | 0 |
| chr9 | 1.35E+08 | 1.35E+08 | 1087 | 1110 | 1.35E+08 | 0.165755 | 0.018182 | 0 |
| chr9 | 1.35E+08 | 1.35E+08 | 910  | 944  | 1.35E+08 | 0.143043 | 0.035431 | 0 |
| chr9 | 1.35E+08 | 1.35E+08 | 951  | 989  | 1.35E+08 | 0.139438 | 0.03913  | 0 |
| chr9 | 1.35E+08 | 1.35E+08 | 984  | 1007 | 1.35E+08 | 0.16263  | 0.020016 | 0 |
| chr9 | 1.35E+08 | 1.35E+08 | 970  | 979  | 1.35E+08 | 0.182639 | 0.010568 | 0 |
| chr9 | 1.35E+08 | 1.36E+08 | 1022 | 1052 | 1.35E+08 | 0.154224 | 0.025742 | 0 |
| chr9 | 1.36E+08 | 1.36E+08 | 1023 | 1054 | 1.36E+08 | 0.152894 | 0.026763 | 0 |
| chr9 | 1.36E+08 | 1.36E+08 | 1020 | 1042 | 1.36E+08 | 0.165177 | 0.01851  | 0 |
| chr9 | 1.36E+08 | 1.36E+08 | 946  | 986  | 1.36E+08 | 0.136216 | 0.042698 | 0 |
| chr9 | 1.36E+08 | 1.36E+08 | 948  | 986  | 1.36E+08 | 0.139262 | 0.039318 | 0 |
| chr9 | 1.36E+08 | 1.36E+08 | 883  | 914  | 1.36E+08 | 0.146182 | 0.032448 | 0 |
| chr9 | 1.36E+08 | 1.36E+08 | 1184 | 1195 | 1.36E+08 | 0.182621 | 0.010574 | 0 |
| chr9 | 1.37E+08 | 1.37E+08 | 1226 | 1277 | 1.37E+08 | 0.137163 | 0.041622 | 0 |
| chr9 | 1.37E+08 | 1.37E+08 | 944  | 956  | 1.37E+08 | 0.177739 | 0.012421 | 0 |
| chr9 | 1.37E+08 | 1.37E+08 | 857  | 889  | 1.37E+08 | 0.143075 | 0.035399 | 0 |
| chr9 | 1.37E+08 | 1.37E+08 | 681  | 708  | 1.37E+08 | 0.139868 | 0.038672 | 0 |
| chr9 | 1.37E+08 | 1.37E+08 | 1238 | 1263 | 1.37E+08 | 0.16712  | 0.017428 | 0 |
| chr9 | 1.37E+08 | 1.38E+08 | 1106 | 1150 | 1.38E+08 | 0.139681 | 0.038872 | 0 |
| chr9 | 1.38E+08 | 1.38E+08 | 1146 | 1194 | 1.38E+08 | 0.136767 | 0.042069 | 0 |
| chr9 | 1.38E+08 | 1.38E+08 | 1227 | 1257 | 1.38E+08 | 0.161114 | 0.02096  | 0 |
| chr9 | 1.38E+08 | 1.38E+08 | 1135 | 1158 | 1.38E+08 | 0.16702  | 0.017482 | 0 |
| chr9 | 1.38E+08 | 1.39E+08 | 945  | 955  | 1.38E+08 | 0.180777 | 0.011241 | 0 |
| chr9 | 1.38E+08 | 1.39E+08 | 1046 | 1065 | 1.39E+08 | 0.169992 | 0.015927 | 0 |
| chr9 | 1.39E+08 | 1.39E+08 | 1291 | 1323 | 1.39E+08 | 0.160639 | 0.021264 | 0 |

|      |          |          |      |      |          |          |          |   |
|------|----------|----------|------|------|----------|----------|----------|---|
| chr9 | 1.39E+08 | 1.39E+08 | 1057 | 1101 | 1.39E+08 | 0.137124 | 0.041667 | 0 |
| chr9 | 1.39E+08 | 1.39E+08 | 1147 | 1182 | 1.39E+08 | 0.152598 | 0.026995 | 0 |
| chr9 | 1.4E+08  | 1.4E+08  | 1060 | 1097 | 1.4E+08  | 0.146464 | 0.032191 | 0 |
| chr9 | 1.4E+08  | 1.4E+08  | 1106 | 1128 | 1.4E+08  | 0.167547 | 0.017197 | 0 |
| chr9 | 1.4E+08  | 1.41E+08 | 967  | 986  | 1.4E+08  | 0.167891 | 0.017013 | 0 |
| chr9 | 1.4E+08  | 1.41E+08 | 956  | 992  | 1.41E+08 | 0.142634 | 0.035836 | 0 |
| chr9 | 1.41E+08 | 1.41E+08 | 959  | 971  | 1.41E+08 | 0.178023 | 0.012307 | 0 |
| chr9 | 1.41E+08 | 1.41E+08 | 1041 | 1087 | 1.41E+08 | 0.133581 | 0.045807 | 0 |
| chrM | 1        | 100000   | 6132 | 6082 | 50000    | 0.207775 | 0.004373 | 0 |
| chrX | 2600001  | 2700000  | 2    | 3    | 2650000  | -0.389   | 8.31E-07 | 0 |
| chrX | 3100001  | 3200000  | 434  | 573  | 3150000  | -0.20488 | 0.005222 | 0 |
| chrX | 3150001  | 3250000  | 415  | 563  | 3200000  | -0.24406 | 0.001173 | 0 |
| chrX | 3300001  | 3400000  | 376  | 500  | 3350000  | -0.21523 | 0.003589 | 0 |
| chrX | 3700001  | 3800000  | 199  | 200  | 3750000  | 0.188731 | 0.008603 | 0 |
| chrX | 3850001  | 3950000  | 407  | 540  | 3900000  | -0.21197 | 0.004046 | 0 |
| chrX | 3900001  | 4000000  | 450  | 593  | 3950000  | -0.20214 | 0.005751 | 0 |
| chrX | 3950001  | 4050000  | 450  | 609  | 4.00E+06 | -0.24055 | 0.001352 | 0 |
| chrX | 4000001  | 4100000  | 450  | 615  | 4050000  | -0.2547  | 0.000755 | 0 |
| chrX | 4350001  | 4450000  | 388  | 523  | 4400000  | -0.23479 | 0.001701 | 0 |
| chrX | 4400001  | 4500000  | 373  | 492  | 4450000  | -0.20352 | 0.005479 | 0 |
| chrX | 4450001  | 4550000  | 352  | 471  | 4500000  | -0.22419 | 0.002566 | 0 |
| chrX | 4600001  | 4700000  | 363  | 504  | 4650000  | -0.27749 | 0.00028  | 0 |
| chrX | 4650001  | 4750000  | 358  | 497  | 4700000  | -0.27732 | 0.000282 | 0 |
| chrX | 4850001  | 4950000  | 404  | 535  | 4900000  | -0.20922 | 0.00447  | 0 |
| chrX | 4900001  | 5000000  | 382  | 523  | 4950000  | -0.25728 | 0.000677 | 0 |
| chrX | 5650001  | 5750000  | 364  | 510  | 5700000  | -0.2906  | 0.000153 | 0 |
| chrX | 5700001  | 5800000  | 403  | 555  | 5750000  | -0.26574 | 0.00047  | 0 |
| chrX | 6050001  | 6150000  | 451  | 588  | 6100000  | -0.18673 | 0.009732 | 0 |
| chrX | 6100001  | 6200000  | 415  | 545  | 6150000  | -0.19718 | 0.006835 | 0 |
| chrX | 6850001  | 6950000  | 159  | 208  | 6900000  | -0.19159 | 0.008271 | 0 |
| chrX | 7500001  | 7600000  | 436  | 574  | 7550000  | -0.20076 | 0.006037 | 0 |
| chrX | 7550001  | 7650000  | 320  | 433  | 7600000  | -0.24033 | 0.001364 | 0 |
| chrX | 8200001  | 8300000  | 400  | 530  | 8250000  | -0.21003 | 0.004341 | 0 |
| chrX | 9150001  | 9250000  | 519  | 677  | 9200000  | -0.18746 | 0.009498 | 0 |
| chrX | 9200001  | 9300000  | 535  | 710  | 9250000  | -0.21232 | 0.003995 | 0 |
| chrX | 10150001 | 10250000 | 490  | 643  | 10200000 | -0.19607 | 0.007101 | 0 |
| chrX | 12450001 | 12550000 | 451  | 595  | 12500000 | -0.2038  | 0.005425 | 0 |
| chrX | 12500001 | 12600000 | 410  | 557  | 12550000 | -0.24609 | 0.00108  | 0 |
| chrX | 14750001 | 14850000 | 440  | 591  | 14800000 | -0.22969 | 0.002077 | 0 |
| chrX | 15250001 | 15350000 | 550  | 548  | 15300000 | 0.201219 | 0.005552 | 0 |
| chrX | 15300001 | 15400000 | 569  | 546  | 15350000 | 0.255491 | 0.00064  | 0 |
| chrX | 16550001 | 16650000 | 454  | 606  | 16600000 | -0.22066 | 0.002932 | 0 |
| chrX | 16750001 | 16850000 | 600  | 568  | 16800000 | 0.275035 | 0.000265 | 0 |
| chrX | 16800001 | 16900000 | 680  | 610  | 16850000 | 0.352689 | 4.72E-06 | 0 |
| chrX | 16850001 | 16950000 | 680  | 661  | 16900000 | 0.236848 | 0.001409 | 0 |
| chrX | 17600001 | 17700000 | 517  | 742  | 17650000 | -0.32529 | 2.80E-05 | 0 |
| chrX | 17650001 | 17750000 | 536  | 735  | 17700000 | -0.25955 | 0.000615 | 0 |



|      |          |          |     |     |          |          |          |   |
|------|----------|----------|-----|-----|----------|----------|----------|---|
| chrX | 17850001 | 17950000 | 495 | 658 | 17900000 | -0.2147  | 0.003661 | 0 |
| chrX | 18800001 | 18900000 | 522 | 526 | 18850000 | 0.18495  | 0.00978  | 0 |
| chrX | 20150001 | 20250000 | 562 | 554 | 20200000 | 0.216647 | 0.003135 | 0 |
| chrX | 20850001 | 20950000 | 408 | 554 | 20900000 | -0.24535 | 0.001113 | 0 |
| chrX | 21050001 | 21150000 | 360 | 481 | 21100000 | -0.22208 | 0.00278  | 0 |
| chrX | 21750001 | 21850000 | 584 | 583 | 21800000 | 0.198436 | 0.006133 | 0 |
| chrX | 22550001 | 22650000 | 419 | 559 | 22600000 | -0.21994 | 0.003013 | 0 |
| chrX | 22600001 | 22700000 | 364 | 544 | 22650000 | -0.38371 | 1.13E-06 | 0 |
| chrX | 23200001 | 23300000 | 428 | 564 | 23250000 | -0.20212 | 0.005755 | 0 |
| chrX | 23750001 | 23850000 | 540 | 539 | 23800000 | 0.198637 | 0.006089 | 0 |
| chrX | 23800001 | 23900000 | 527 | 522 | 23850000 | 0.209716 | 0.004069 | 0 |
| chrX | 24050001 | 24150000 | 507 | 511 | 24100000 | 0.184625 | 0.009888 | 0 |
| chrX | 24750001 | 24850000 | 645 | 628 | 24800000 | 0.234498 | 0.001551 | 0 |
| chrX | 25000001 | 25100000 | 547 | 717 | 25050000 | -0.19447 | 0.007502 | 0 |
| chrX | 25350001 | 25450000 | 389 | 516 | 25400000 | -0.21164 | 0.004095 | 0 |
| chrX | 25850001 | 25950000 | 386 | 503 | 25900000 | -0.18599 | 0.00997  | 0 |
| chrX | 25900001 | 26000000 | 371 | 507 | 25950000 | -0.2546  | 0.000758 | 0 |
| chrX | 26350001 | 26450000 | 355 | 468 | 26400000 | -0.20273 | 0.005634 | 0 |
| chrX | 26950001 | 27050000 | 372 | 510 | 2.70E+07 | -0.25923 | 0.000623 | 0 |
| chrX | 27600001 | 27700000 | 380 | 507 | 27650000 | -0.22002 | 0.003003 | 0 |
| chrX | 27850001 | 27950000 | 416 | 547 | 27900000 | -0.19899 | 0.00642  | 0 |
| chrX | 27900001 | 28000000 | 403 | 558 | 27950000 | -0.27352 | 0.000334 | 0 |
| chrX | 28050001 | 28150000 | 422 | 558 | 28100000 | -0.20706 | 0.004831 | 0 |
| chrX | 28250001 | 28350000 | 411 | 539 | 28300000 | -0.19518 | 0.007321 | 0 |
| chrX | 28850001 | 28950000 | 402 | 536 | 28900000 | -0.21907 | 0.003112 | 0 |
| chrX | 29050001 | 29150000 | 422 | 553 | 29100000 | -0.19407 | 0.007604 | 0 |
| chrX | 29300001 | 29400000 | 386 | 508 | 29350000 | -0.20026 | 0.006142 | 0 |
| chrX | 31700001 | 31800000 | 450 | 600 | 31750000 | -0.21907 | 0.003112 | 0 |
| chrX | 32600001 | 32700000 | 390 | 538 | 32650000 | -0.26817 | 0.000423 | 0 |
| chrX | 33350001 | 33450000 | 366 | 477 | 33400000 | -0.18618 | 0.009908 | 0 |
| chrX | 33400001 | 33500000 | 401 | 524 | 33450000 | -0.19    | 0.008726 | 0 |
| chrX | 33450001 | 33550000 | 403 | 530 | 33500000 | -0.19925 | 0.006363 | 0 |
| chrX | 33500001 | 33600000 | 382 | 514 | 33550000 | -0.23223 | 0.001881 | 0 |
| chrX | 33600001 | 33700000 | 379 | 512 | 33650000 | -0.23798 | 0.001499 | 0 |
| chrX | 33650001 | 33750000 | 355 | 495 | 33700000 | -0.28365 | 0.000211 | 0 |
| chrX | 33800001 | 33900000 | 380 | 518 | 33850000 | -0.25099 | 0.000882 | 0 |
| chrX | 33900001 | 34000000 | 379 | 513 | 33950000 | -0.2408  | 0.001339 | 0 |
| chrX | 33950001 | 34050000 | 387 | 531 | 3.40E+07 | -0.26042 | 0.000592 | 0 |
| chrX | 34000001 | 34100000 | 414 | 544 | 34050000 | -0.19801 | 0.006642 | 0 |
| chrX | 34600001 | 34700000 | 376 | 535 | 34650000 | -0.31284 | 5.24E-05 | 0 |
| chrX | 34650001 | 34750000 | 379 | 531 | 34700000 | -0.29055 | 0.000153 | 0 |
| chrX | 35250001 | 35350000 | 353 | 472 | 35300000 | -0.22316 | 0.002669 | 0 |
| chrX | 35650001 | 35750000 | 380 | 509 | 35700000 | -0.2257  | 0.002422 | 0 |
| chrX | 35700001 | 35800000 | 378 | 514 | 35750000 | -0.24742 | 0.001022 | 0 |
| chrX | 35750001 | 35850000 | 404 | 527 | 35800000 | -0.18748 | 0.00949  | 0 |
| chrX | 35900001 | 36000000 | 399 | 551 | 35950000 | -0.2697  | 0.000396 | 0 |
| chrX | 35950001 | 36050000 | 402 | 563 | 3.60E+07 | -0.28998 | 0.000158 | 0 |

|      |          |          |     |     |          |          |          |   |
|------|----------|----------|-----|-----|----------|----------|----------|---|
| chrX | 36000001 | 36100000 | 391 | 525 | 36050000 | -0.22919 | 0.002118 | 0 |
| chrX | 36050001 | 36150000 | 383 | 505 | 36100000 | -0.20298 | 0.005585 | 0 |
| chrX | 36100001 | 36200000 | 364 | 509 | 36150000 | -0.28776 | 0.000175 | 0 |
| chrX | 36150001 | 36250000 | 382 | 512 | 36200000 | -0.22661 | 0.002339 | 0 |
| chrX | 36900001 | 37000000 | 402 | 554 | 36950000 | -0.26673 | 0.000451 | 0 |
| chrX | 39750001 | 39850000 | 737 | 704 | 39800000 | 0.262052 | 0.000479 | 0 |
| chrX | 39800001 | 39900000 | 715 | 692 | 39850000 | 0.243134 | 0.001086 | 0 |
| chrX | 40450001 | 40550000 | 673 | 672 | 40500000 | 0.198108 | 0.006205 | 0 |
| chrX | 40500001 | 40600000 | 671 | 666 | 40550000 | 0.206754 | 0.00454  | 0 |
| chrX | 40750001 | 40850000 | 579 | 562 | 40800000 | 0.238956 | 0.001292 | 0 |
| chrX | 40900001 | 41000000 | 620 | 615 | 40950000 | 0.207645 | 0.004394 | 0 |
| chrX | 40950001 | 41050000 | 670 | 653 | 4.10E+07 | 0.233041 | 0.001646 | 0 |
| chrX | 41450001 | 41550000 | 413 | 560 | 41500000 | -0.24332 | 0.001209 | 0 |
| chrX | 42000001 | 42100000 | 449 | 589 | 42050000 | -0.19559 | 0.00722  | 0 |
| chrX | 42450001 | 42550000 | 355 | 492 | 42500000 | -0.27488 | 0.000314 | 0 |
| chrX | 42800001 | 42900000 | 389 | 519 | 42850000 | -0.22    | 0.003006 | 0 |
| chrX | 42850001 | 42950000 | 398 | 531 | 42900000 | -0.21998 | 0.003008 | 0 |
| chrX | 42900001 | 43000000 | 428 | 562 | 42950000 | -0.197   | 0.006879 | 0 |
| chrX | 43750001 | 43850000 | 485 | 650 | 43800000 | -0.22649 | 0.00235  | 0 |
| chrX | 44000001 | 44100000 | 497 | 657 | 44050000 | -0.20668 | 0.004896 | 0 |
| chrX | 44050001 | 44150000 | 414 | 591 | 44100000 | -0.31756 | 4.14E-05 | 0 |
| chrX | 44100001 | 44200000 | 418 | 589 | 44150000 | -0.2988  | 0.000104 | 0 |
| chrX | 44150001 | 44250000 | 433 | 601 | 44200000 | -0.27703 | 0.000285 | 0 |
| chrX | 44350001 | 44450000 | 463 | 464 | 44400000 | 0.19285  | 0.007464 | 0 |
| chrX | 45750001 | 45850000 | 474 | 622 | 45800000 | -0.19606 | 0.007103 | 0 |
| chrX | 46400001 | 46500000 | 567 | 567 | 46450000 | 0.195963 | 0.006694 | 0 |
| chrX | 46950001 | 47050000 | 657 | 649 | 4.70E+07 | 0.213638 | 0.003514 | 0 |
| chrX | 47000001 | 47100000 | 756 | 735 | 47050000 | 0.236605 | 0.001423 | 0 |
| chrX | 47350001 | 47450000 | 629 | 627 | 47400000 | 0.200558 | 0.005685 | 0 |
| chrX | 47550001 | 47650000 | 445 | 634 | 47600000 | -0.31471 | 4.77E-05 | 0 |
| chrX | 47600001 | 47700000 | 434 | 607 | 47650000 | -0.28804 | 0.000172 | 0 |
| chrX | 48250001 | 48350000 | 372 | 366 | 48300000 | 0.219422 | 0.002818 | 0 |
| chrX | 48300001 | 48400000 | 744 | 713 | 48350000 | 0.257364 | 0.00059  | 0 |
| chrX | 48350001 | 48450000 | 707 | 661 | 48400000 | 0.293023 | 0.000112 | 0 |
| chrX | 48400001 | 48500000 | 606 | 565 | 48450000 | 0.29703  | 9.23E-05 | 0 |
| chrX | 48500001 | 48600000 | 705 | 707 | 48550000 | 0.191876 | 0.007721 | 0 |
| chrX | 48550001 | 48650000 | 746 | 695 | 48600000 | 0.298126 | 8.74E-05 | 0 |
| chrX | 48600001 | 48700000 | 688 | 678 | 48650000 | 0.217086 | 0.003083 | 0 |
| chrX | 48700001 | 48800000 | 574 | 575 | 48750000 | 0.193452 | 0.007309 | 0 |
| chrX | 48750001 | 48850000 | 769 | 746 | 48800000 | 0.239771 | 0.001249 | 0 |
| chrX | 48800001 | 48900000 | 662 | 660 | 48850000 | 0.200328 | 0.005732 | 0 |
| chrX | 48850001 | 48950000 | 630 | 635 | 48900000 | 0.184558 | 0.00991  | 0 |
| chrX | 48900001 | 49000000 | 620 | 625 | 48950000 | 0.184375 | 0.009971 | 0 |
| chrX | 48950001 | 49050000 | 604 | 556 | 4.90E+07 | 0.315427 | 3.62E-05 | 0 |
| chrX | 49000001 | 49100000 | 728 | 669 | 49050000 | 0.317895 | 3.18E-05 | 0 |
| chrX | 49050001 | 49150000 | 787 | 768 | 49100000 | 0.23122  | 0.001771 | 0 |
| chrX | 49100001 | 49200000 | 505 | 499 | 49150000 | 0.213207 | 0.003571 | 0 |

|      |          |          |     |     |          |          |          |   |
|------|----------|----------|-----|-----|----------|----------|----------|---|
| chrX | 49200001 | 49300000 | 2   | 2   | 49250000 | 0.195963 | 0.006694 | 0 |
| chrX | 51100001 | 51200000 | 339 | 474 | 51150000 | -0.28764 | 0.000176 | 0 |
| chrX | 51650001 | 51750000 | 331 | 432 | 51700000 | -0.18824 | 0.009255 | 0 |
| chrX | 51850001 | 51950000 | 181 | 263 | 51900000 | -0.34311 | 1.10E-05 | 0 |
| chrX | 52100001 | 52200000 | 11  | 16  | 52150000 | -0.34461 | 1.02E-05 | 0 |
| chrX | 52450001 | 52550000 | 2   | 2   | 52500000 | 0.195963 | 0.006694 | 0 |
| chrX | 52700001 | 52800000 | 5   | 7   | 52750000 | -0.28946 | 0.000161 | 0 |
| chrX | 52900001 | 53000000 | 123 | 118 | 52950000 | 0.255834 | 0.00063  | 0 |
| chrX | 53000001 | 53100000 | 609 | 606 | 53050000 | 0.203087 | 0.00519  | 0 |
| chrX | 53050001 | 53150000 | 616 | 611 | 53100000 | 0.207721 | 0.004381 | 0 |
| chrX | 53400001 | 53500000 | 623 | 603 | 53450000 | 0.243037 | 0.00109  | 0 |
| chrX | 54850001 | 54950000 | 309 | 442 | 54900000 | -0.32048 | 3.57E-05 | 0 |
| chrX | 54900001 | 55000000 | 409 | 548 | 54950000 | -0.22611 | 0.002384 | 0 |
| chrX | 55200001 | 55300000 | 366 | 477 | 55250000 | -0.18618 | 0.009908 | 0 |
| chrX | 55400001 | 55500000 | 268 | 356 | 55450000 | -0.21368 | 0.0038   | 0 |
| chrX | 55700001 | 55800000 | 376 | 497 | 55750000 | -0.20655 | 0.00492  | 0 |
| chrX | 55750001 | 55850000 | 394 | 518 | 55800000 | -0.19879 | 0.006465 | 0 |
| chrX | 56200001 | 56300000 | 350 | 459 | 56250000 | -0.19518 | 0.007323 | 0 |
| chrX | 56450001 | 56550000 | 280 | 391 | 56500000 | -0.28578 | 0.000192 | 0 |
| chrX | 56500001 | 56600000 | 386 | 520 | 56550000 | -0.23395 | 0.001758 | 0 |
| chrX | 56900001 | 57000000 | 289 | 402 | 56950000 | -0.28016 | 0.000248 | 0 |
| chrX | 56950001 | 57050000 | 401 | 536 | 5.70E+07 | -0.22267 | 0.002718 | 0 |
| chrX | 57000001 | 57100000 | 425 | 556 | 57050000 | -0.19166 | 0.008252 | 0 |
| chrX | 57450001 | 57550000 | 358 | 500 | 57500000 | -0.28601 | 0.00019  | 0 |
| chrX | 57500001 | 57600000 | 349 | 483 | 57550000 | -0.27283 | 0.000344 | 0 |
| chrX | 57950001 | 58050000 | 373 | 506 | 5.80E+07 | -0.244   | 0.001176 | 0 |
| chrX | 58000001 | 58100000 | 374 | 528 | 58050000 | -0.30154 | 9.11E-05 | 0 |
| chrX | 58050001 | 58150000 | 403 | 536 | 58100000 | -0.21549 | 0.003555 | 0 |
| chrX | 58100001 | 58200000 | 398 | 521 | 58150000 | -0.19255 | 0.008007 | 0 |
| chrX | 58300001 | 58400000 | 418 | 556 | 58350000 | -0.21562 | 0.003539 | 0 |
| chrX | 58350001 | 58450000 | 344 | 466 | 58400000 | -0.24196 | 0.001277 | 0 |
| chrX | 58400001 | 58500000 | 293 | 410 | 58450000 | -0.28876 | 0.000167 | 0 |
| chrX | 58450001 | 58550000 | 232 | 307 | 58500000 | -0.20815 | 0.004645 | 0 |
| chrX | 61600001 | 61700000 | 12  | 18  | 61650000 | -0.389   | 8.31E-07 | 0 |
| chrX | 61850001 | 61950000 | 392 | 532 | 61900000 | -0.24461 | 0.001147 | 0 |
| chrX | 62400001 | 62500000 | 96  | 138 | 62450000 | -0.3276  | 2.48E-05 | 0 |
| chrX | 62700001 | 62800000 | 334 | 437 | 62750000 | -0.19182 | 0.008207 | 0 |
| chrX | 62750001 | 62850000 | 293 | 427 | 62800000 | -0.34737 | 8.75E-06 | 0 |
| chrX | 62800001 | 62900000 | 321 | 424 | 62850000 | -0.20553 | 0.005102 | 0 |
| chrX | 62900001 | 63000000 | 452 | 596 | 62950000 | -0.20303 | 0.005575 | 0 |
| chrX | 63000001 | 63100000 | 348 | 473 | 63050000 | -0.24679 | 0.001049 | 0 |
| chrX | 63050001 | 63150000 | 326 | 459 | 63100000 | -0.29766 | 0.00011  | 0 |
| chrX | 63100001 | 63200000 | 369 | 489 | 63150000 | -0.21025 | 0.004306 | 0 |
| chrX | 63550001 | 63650000 | 328 | 473 | 63600000 | -0.33218 | 1.96E-05 | 0 |
| chrX | 63600001 | 63700000 | 346 | 451 | 63650000 | -0.18639 | 0.009839 | 0 |
| chrX | 63950001 | 64050000 | 303 | 396 | 6.40E+07 | -0.19022 | 0.008662 | 0 |
| chrX | 64000001 | 64100000 | 332 | 434 | 64050000 | -0.19055 | 0.008567 | 0 |

|      |          |          |     |     |          |          |          |   |
|------|----------|----------|-----|-----|----------|----------|----------|---|
| chrX | 65100001 | 65200000 | 372 | 510 | 65150000 | -0.25923 | 0.000623 | 0 |
| chrX | 65550001 | 65650000 | 303 | 437 | 65600000 | -0.33235 | 1.94E-05 | 0 |
| chrX | 65600001 | 65700000 | 341 | 497 | 65650000 | -0.34751 | 8.68E-06 | 0 |
| chrX | 65900001 | 66000000 | 336 | 439 | 65950000 | -0.1898  | 0.008786 | 0 |
| chrX | 66050001 | 66150000 | 380 | 514 | 66100000 | -0.23981 | 0.001393 | 0 |
| chrX | 66100001 | 66200000 | 296 | 419 | 66150000 | -0.30539 | 7.56E-05 | 0 |
| chrX | 66350001 | 66450000 | 326 | 430 | 66400000 | -0.2035  | 0.005482 | 0 |
| chrX | 67250001 | 67350000 | 466 | 610 | 67300000 | -0.19252 | 0.008017 | 0 |
| chrX | 67650001 | 67750000 | 526 | 530 | 67700000 | 0.185033 | 0.009753 | 0 |
| chrX | 69500001 | 69600000 | 568 | 562 | 69550000 | 0.211284 | 0.003839 | 0 |
| chrX | 70900001 | 71000000 | 26  | 23  | 70950000 | 0.372841 | 1.45E-06 | 0 |
| chrX | 71000001 | 71100000 | 254 | 334 | 71050000 | -0.19906 | 0.006406 | 0 |
| chrX | 71950001 | 72050000 | 65  | 86  | 7.20E+07 | -0.20793 | 0.004682 | 0 |
| chrX | 72000001 | 72100000 | 6   | 2   | 72050000 | 1.780926 | 4.68E-73 | 0 |
| chrX | 72050001 | 72150000 | 4   | 4   | 72100000 | 0.195963 | 0.006694 | 0 |
| chrX | 72100001 | 72200000 | 3   | 8   | 72150000 | -1.21907 | 5.55E-40 | 0 |
| chrX | 72150001 | 72250000 | 157 | 205 | 72200000 | -0.1889  | 0.009054 | 0 |
| chrX | 72250001 | 72350000 | 239 | 313 | 72300000 | -0.19319 | 0.007836 | 0 |
| chrX | 72850001 | 72950000 | 334 | 441 | 72900000 | -0.20497 | 0.005205 | 0 |
| chrX | 73150001 | 73250000 | 563 | 556 | 73200000 | 0.214013 | 0.003464 | 0 |
| chrX | 73750001 | 73850000 | 590 | 593 | 73800000 | 0.188646 | 0.008628 | 0 |
| chrX | 74000001 | 74100000 | 360 | 486 | 74050000 | -0.237   | 0.001559 | 0 |
| chrX | 74400001 | 74500000 | 301 | 396 | 74450000 | -0.19977 | 0.006248 | 0 |
| chrX | 74550001 | 74650000 | 368 | 480 | 74600000 | -0.18737 | 0.009527 | 0 |
| chrX | 74700001 | 74800000 | 263 | 389 | 74750000 | -0.36874 | 2.68E-06 | 0 |
| chrX | 75150001 | 75250000 | 311 | 411 | 75200000 | -0.20626 | 0.004971 | 0 |
| chrX | 75200001 | 75300000 | 307 | 403 | 75250000 | -0.19658 | 0.006979 | 0 |
| chrX | 75750001 | 75850000 | 273 | 375 | 75800000 | -0.26203 | 0.000553 | 0 |
| chrX | 76150001 | 76250000 | 293 | 398 | 76200000 | -0.2459  | 0.001088 | 0 |
| chrX | 76200001 | 76300000 | 323 | 425 | 76250000 | -0.19997 | 0.006206 | 0 |
| chrX | 76750001 | 76850000 | 434 | 566 | 76800000 | -0.18714 | 0.009598 | 0 |
| chrX | 77000001 | 77100000 | 427 | 430 | 77050000 | 0.185862 | 0.009484 | 0 |
| chrX | 77100001 | 77200000 | 513 | 509 | 77150000 | 0.207256 | 0.004457 | 0 |
| chrX | 77400001 | 77500000 | 306 | 404 | 77450000 | -0.20486 | 0.005225 | 0 |
| chrX | 77600001 | 77700000 | 355 | 482 | 77650000 | -0.24525 | 0.001117 | 0 |
| chrX | 77650001 | 77750000 | 314 | 442 | 77700000 | -0.29732 | 0.000111 | 0 |
| chrX | 78000001 | 78100000 | 387 | 517 | 78050000 | -0.22187 | 0.002802 | 0 |
| chrX | 78050001 | 78150000 | 346 | 503 | 78100000 | -0.34382 | 1.06E-05 | 0 |
| chrX | 78100001 | 78200000 | 354 | 501 | 78150000 | -0.3051  | 7.66E-05 | 0 |
| chrX | 78450001 | 78550000 | 318 | 482 | 78500000 | -0.40404 | 3.37E-07 | 0 |
| chrX | 78500001 | 78600000 | 391 | 515 | 78550000 | -0.20144 | 0.005895 | 0 |
| chrX | 78600001 | 78700000 | 388 | 554 | 78650000 | -0.31787 | 4.07E-05 | 0 |
| chrX | 78650001 | 78750000 | 379 | 518 | 78700000 | -0.25479 | 0.000752 | 0 |
| chrX | 79200001 | 79300000 | 352 | 490 | 79250000 | -0.28124 | 0.000236 | 0 |
| chrX | 80600001 | 80700000 | 426 | 571 | 80650000 | -0.22667 | 0.002333 | 0 |
| chrX | 80650001 | 80750000 | 377 | 505 | 80700000 | -0.22576 | 0.002417 | 0 |
| chrX | 80850001 | 80950000 | 352 | 477 | 80900000 | -0.24245 | 0.001252 | 0 |

|      |          |          |     |     |          |          |          |   |
|------|----------|----------|-----|-----|----------|----------|----------|---|
| chrX | 81200001 | 81300000 | 327 | 437 | 81250000 | -0.22238 | 0.002748 | 0 |
| chrX | 81500001 | 81600000 | 367 | 515 | 81550000 | -0.29283 | 0.000138 | 0 |
| chrX | 81550001 | 81650000 | 342 | 485 | 81600000 | -0.30803 | 6.64E-05 | 0 |
| chrX | 81600001 | 81700000 | 368 | 492 | 81650000 | -0.22299 | 0.002685 | 0 |
| chrX | 82050001 | 82150000 | 328 | 462 | 82100000 | -0.29823 | 0.000107 | 0 |
| chrX | 82100001 | 82200000 | 375 | 490 | 82150000 | -0.18993 | 0.008747 | 0 |
| chrX | 82300001 | 82400000 | 325 | 457 | 82350000 | -0.29579 | 0.00012  | 0 |
| chrX | 82600001 | 82700000 | 309 | 422 | 82650000 | -0.25367 | 0.000788 | 0 |
| chrX | 82650001 | 82750000 | 366 | 480 | 82700000 | -0.19523 | 0.00731  | 0 |
| chrX | 82750001 | 82850000 | 369 | 496 | 82800000 | -0.23076 | 0.001992 | 0 |
| chrX | 82800001 | 82900000 | 334 | 462 | 82850000 | -0.27208 | 0.000356 | 0 |
| chrX | 82950001 | 83050000 | 305 | 420 | 8.30E+07 | -0.26562 | 0.000473 | 0 |
| chrX | 83000001 | 83100000 | 318 | 436 | 83050000 | -0.25934 | 0.00062  | 0 |
| chrX | 83050001 | 83150000 | 380 | 516 | 83100000 | -0.24541 | 0.00111  | 0 |
| chrX | 83100001 | 83200000 | 391 | 541 | 83150000 | -0.2725  | 0.00035  | 0 |
| chrX | 83150001 | 83250000 | 354 | 506 | 83200000 | -0.31942 | 3.77E-05 | 0 |
| chrX | 83200001 | 83300000 | 352 | 468 | 83250000 | -0.21497 | 0.003624 | 0 |
| chrX | 83350001 | 83450000 | 380 | 498 | 83400000 | -0.19418 | 0.007575 | 0 |
| chrX | 83600001 | 83700000 | 385 | 521 | 83650000 | -0.24046 | 0.001357 | 0 |
| chrX | 83750001 | 83850000 | 246 | 327 | 83800000 | -0.21467 | 0.003665 | 0 |
| chrX | 83800001 | 83900000 | 148 | 208 | 83850000 | -0.29502 | 0.000124 | 0 |
| chrX | 84100001 | 84200000 | 385 | 383 | 84150000 | 0.203477 | 0.005117 | 0 |
| chrX | 84450001 | 84550000 | 403 | 532 | 84500000 | -0.20468 | 0.005258 | 0 |
| chrX | 84650001 | 84750000 | 374 | 497 | 84700000 | -0.21424 | 0.003722 | 0 |
| chrX | 84700001 | 84800000 | 379 | 514 | 84750000 | -0.24361 | 0.001195 | 0 |
| chrX | 85300001 | 85400000 | 383 | 501 | 85350000 | -0.1915  | 0.008296 | 0 |
| chrX | 85350001 | 85450000 | 357 | 488 | 85400000 | -0.25499 | 0.000746 | 0 |
| chrX | 85850001 | 85950000 | 367 | 539 | 85900000 | -0.35854 | 4.75E-06 | 0 |
| chrX | 85900001 | 86000000 | 391 | 519 | 85950000 | -0.2126  | 0.003953 | 0 |
| chrX | 85950001 | 86050000 | 398 | 523 | 8.60E+07 | -0.19808 | 0.006627 | 0 |
| chrX | 86200001 | 86300000 | 330 | 437 | 86250000 | -0.2092  | 0.004472 | 0 |
| chrX | 86250001 | 86350000 | 375 | 502 | 86300000 | -0.22483 | 0.002504 | 0 |
| chrX | 86300001 | 86400000 | 324 | 451 | 86350000 | -0.28117 | 0.000237 | 0 |
| chrX | 86350001 | 86450000 | 310 | 454 | 86400000 | -0.35446 | 5.95E-06 | 0 |
| chrX | 86400001 | 86500000 | 355 | 495 | 86450000 | -0.28365 | 0.000211 | 0 |
| chrX | 87000001 | 87100000 | 359 | 473 | 87050000 | -0.20189 | 0.005802 | 0 |
| chrX | 87200001 | 87300000 | 364 | 504 | 87250000 | -0.27352 | 0.000334 | 0 |
| chrX | 87700001 | 87800000 | 439 | 438 | 87750000 | 0.199253 | 0.005957 | 0 |
| chrX | 87800001 | 87900000 | 421 | 565 | 87850000 | -0.22847 | 0.002177 | 0 |
| chrX | 87850001 | 87950000 | 446 | 582 | 87900000 | -0.18801 | 0.009325 | 0 |
| chrX | 87900001 | 88000000 | 434 | 566 | 87950000 | -0.18714 | 0.009598 | 0 |
| chrX | 87950001 | 88050000 | 389 | 516 | 8.80E+07 | -0.21164 | 0.004095 | 0 |
| chrX | 88500001 | 88600000 | 39  | 37  | 88550000 | 0.271912 | 0.000306 | 0 |
| chrX | 88700001 | 88800000 | 32  | 32  | 88750000 | 0.195963 | 0.006694 | 0 |
| chrX | 88900001 | 89000000 | 66  | 86  | 88950000 | -0.18591 | 0.009998 | 0 |
| chrX | 89000001 | 89100000 | 32  | 26  | 89050000 | 0.495523 | 3.40E-10 | 0 |
| chrX | 89150001 | 89250000 | 35  | 19  | 89200000 | 1.077319 | 3.55E-36 | 0 |

|      |          |          |     |     |          |          |          |   |
|------|----------|----------|-----|-----|----------|----------|----------|---|
| chrX | 89350001 | 89450000 | 62  | 42  | 89400000 | 0.757842 | 1.76E-20 | 0 |
| chrX | 89400001 | 89500000 | 52  | 52  | 89450000 | 0.195963 | 0.006694 | 0 |
| chrX | 89500001 | 89600000 | 40  | 39  | 89550000 | 0.232489 | 0.001683 | 0 |
| chrX | 89650001 | 89750000 | 28  | 24  | 89700000 | 0.418355 | 8.19E-08 | 0 |
| chrX | 89700001 | 89800000 | 25  | 33  | 89750000 | -0.20457 | 0.005278 | 0 |
| chrX | 89750001 | 89850000 | 20  | 34  | 89800000 | -0.56957 | 3.13E-12 | 0 |
| chrX | 89800001 | 89900000 | 29  | 60  | 89850000 | -0.85295 | 2.76E-23 | 0 |
| chrX | 89850001 | 89950000 | 42  | 76  | 89900000 | -0.65965 | 1.85E-15 | 0 |
| chrX | 89950001 | 90050000 | 35  | 49  | 9.00E+07 | -0.28946 | 0.000161 | 0 |
| chrX | 90000001 | 90100000 | 30  | 43  | 90050000 | -0.32341 | 3.08E-05 | 0 |
| chrX | 90100001 | 90200000 | 38  | 58  | 90150000 | -0.41409 | 1.82E-07 | 0 |
| chrX | 90450001 | 90550000 | 153 | 201 | 90500000 | -0.1977  | 0.006714 | 0 |
| chrX | 90550001 | 90650000 | 297 | 411 | 90600000 | -0.27271 | 0.000346 | 0 |
| chrX | 90750001 | 90850000 | 41  | 31  | 90800000 | 0.599319 | 6.85E-14 | 0 |
| chrX | 90850001 | 90950000 | 23  | 32  | 90900000 | -0.28048 | 0.000244 | 0 |
| chrX | 90900001 | 91000000 | 95  | 136 | 90950000 | -0.32164 | 3.37E-05 | 0 |
| chrX | 90950001 | 91050000 | 111 | 147 | 9.10E+07 | -0.20929 | 0.004458 | 0 |
| chrX | 91000001 | 91100000 | 34  | 31  | 91050000 | 0.32923  | 1.74E-05 | 0 |
| chrX | 91100001 | 91200000 | 21  | 32  | 91150000 | -0.41172 | 2.11E-07 | 0 |
| chrX | 91150001 | 91250000 | 25  | 37  | 91200000 | -0.36963 | 2.55E-06 | 0 |
| chrX | 91200001 | 91300000 | 20  | 29  | 91250000 | -0.34009 | 1.29E-05 | 0 |
| chrX | 91250001 | 91350000 | 23  | 23  | 91300000 | 0.195963 | 0.006694 | 0 |
| chrX | 91300001 | 91400000 | 37  | 30  | 91350000 | 0.498526 | 2.71E-10 | 0 |
| chrX | 91600001 | 91700000 | 30  | 30  | 91650000 | 0.195963 | 0.006694 | 0 |
| chrX | 91650001 | 91750000 | 23  | 30  | 91700000 | -0.18737 | 0.009527 | 0 |
| chrX | 91700001 | 91800000 | 19  | 26  | 91750000 | -0.25655 | 0.000698 | 0 |
| chrX | 91750001 | 91850000 | 27  | 27  | 91800000 | 0.195963 | 0.006694 | 0 |
| chrX | 91900001 | 92000000 | 32  | 23  | 91950000 | 0.672401 | 8.45E-17 | 0 |
| chrX | 91950001 | 92050000 | 30  | 24  | 9.20E+07 | 0.517891 | 6.05E-11 | 0 |
| chrX | 92050001 | 92150000 | 43  | 40  | 92100000 | 0.3003   | 7.85E-05 | 0 |
| chrX | 92150001 | 92250000 | 38  | 54  | 92200000 | -0.311   | 5.74E-05 | 0 |
| chrX | 92200001 | 92300000 | 25  | 42  | 92250000 | -0.5525  | 1.18E-11 | 0 |
| chrX | 92250001 | 92350000 | 32  | 48  | 92300000 | -0.389   | 8.31E-07 | 0 |
| chrX | 92400001 | 92500000 | 328 | 473 | 92450000 | -0.33218 | 1.96E-05 | 0 |
| chrX | 92450001 | 92550000 | 351 | 474 | 92500000 | -0.23745 | 0.001531 | 0 |
| chrX | 92550001 | 92650000 | 365 | 481 | 92600000 | -0.20218 | 0.005744 | 0 |
| chrX | 92600001 | 92700000 | 374 | 490 | 92650000 | -0.19378 | 0.00768  | 0 |
| chrX | 92700001 | 92800000 | 343 | 488 | 92750000 | -0.31271 | 5.27E-05 | 0 |
| chrX | 92750001 | 92850000 | 340 | 463 | 92800000 | -0.24951 | 0.000938 | 0 |
| chrX | 93100001 | 93200000 | 333 | 440 | 93150000 | -0.20602 | 0.005014 | 0 |
| chrX | 93150001 | 93250000 | 324 | 439 | 93200000 | -0.24226 | 0.001262 | 0 |
| chrX | 93200001 | 93300000 | 323 | 466 | 93250000 | -0.33283 | 1.89E-05 | 0 |
| chrX | 93250001 | 93350000 | 333 | 471 | 93300000 | -0.30424 | 7.99E-05 | 0 |
| chrX | 93450001 | 93550000 | 375 | 506 | 93500000 | -0.23628 | 0.001603 | 0 |
| chrX | 93650001 | 93750000 | 345 | 450 | 93700000 | -0.18737 | 0.009527 | 0 |
| chrX | 93700001 | 93800000 | 330 | 441 | 93750000 | -0.22235 | 0.002751 | 0 |
| chrX | 93750001 | 93850000 | 335 | 474 | 93800000 | -0.30476 | 7.79E-05 | 0 |

|      |          |          |     |     |          |          |          |   |
|------|----------|----------|-----|-----|----------|----------|----------|---|
| chrX | 93800001 | 93900000 | 339 | 464 | 93850000 | -0.25688 | 0.000689 | 0 |
| chrX | 93850001 | 93950000 | 371 | 486 | 93900000 | -0.19357 | 0.007734 | 0 |
| chrX | 93900001 | 94000000 | 348 | 496 | 93950000 | -0.31529 | 4.64E-05 | 0 |
| chrX | 93950001 | 94050000 | 312 | 425 | 9.40E+07 | -0.24995 | 0.000921 | 0 |
| chrX | 94050001 | 94150000 | 300 | 406 | 94100000 | -0.24055 | 0.001352 | 0 |
| chrX | 94100001 | 94200000 | 333 | 466 | 94150000 | -0.28884 | 0.000166 | 0 |
| chrX | 94150001 | 94250000 | 365 | 499 | 94200000 | -0.25518 | 0.00074  | 0 |
| chrX | 94200001 | 94300000 | 362 | 485 | 94250000 | -0.22603 | 0.002391 | 0 |
| chrX | 94400001 | 94500000 | 364 | 481 | 94450000 | -0.20614 | 0.004993 | 0 |
| chrX | 94900001 | 95000000 | 369 | 528 | 94950000 | -0.32095 | 3.49E-05 | 0 |
| chrX | 94950001 | 95050000 | 375 | 539 | 9.50E+07 | -0.32743 | 2.50E-05 | 0 |
| chrX | 95000001 | 95100000 | 390 | 517 | 95050000 | -0.21073 | 0.004233 | 0 |
| chrX | 95100001 | 95200000 | 370 | 484 | 95150000 | -0.19152 | 0.008292 | 0 |
| chrX | 95150001 | 95250000 | 364 | 497 | 95200000 | -0.25334 | 0.000799 | 0 |
| chrX | 95350001 | 95450000 | 389 | 517 | 95400000 | -0.21443 | 0.003697 | 0 |
| chrX | 95500001 | 95600000 | 309 | 424 | 95550000 | -0.26049 | 0.00059  | 0 |
| chrX | 95550001 | 95650000 | 366 | 507 | 95600000 | -0.27418 | 0.000324 | 0 |
| chrX | 96850001 | 96950000 | 432 | 618 | 96900000 | -0.32061 | 3.55E-05 | 0 |
| chrX | 96900001 | 97000000 | 416 | 588 | 96950000 | -0.30327 | 8.37E-05 | 0 |
| chrX | 97900001 | 98000000 | 327 | 435 | 97950000 | -0.21576 | 0.00352  | 0 |
| chrX | 98000001 | 98100000 | 368 | 518 | 98050000 | -0.29728 | 0.000112 | 0 |
| chrX | 98050001 | 98150000 | 339 | 496 | 98100000 | -0.35309 | 6.41E-06 | 0 |
| chrX | 98100001 | 98200000 | 346 | 452 | 98150000 | -0.18959 | 0.008847 | 0 |
| chrX | 98150001 | 98250000 | 375 | 505 | 98200000 | -0.23343 | 0.001795 | 0 |
| chrX | 98200001 | 98300000 | 392 | 513 | 98250000 | -0.19214 | 0.008119 | 0 |
| chrX | 98600001 | 98700000 | 383 | 504 | 98650000 | -0.20012 | 0.006174 | 0 |
| chrX | 98800001 | 98900000 | 334 | 474 | 98850000 | -0.30908 | 6.31E-05 | 0 |
| chrX | 98850001 | 98950000 | 370 | 493 | 98900000 | -0.2181  | 0.003227 | 0 |
| chrX | 99650001 | 99750000 | 480 | 648 | 99700000 | -0.237   | 0.001559 | 0 |
| chrX | 99700001 | 99800000 | 421 | 591 | 99750000 | -0.29337 | 0.000134 | 0 |
| chrX | 99750001 | 99850000 | 405 | 538 | 99800000 | -0.21372 | 0.003795 | 0 |
| chrX | 1E+08    | 1E+08    | 510 | 474 | 1E+08    | 0.301573 | 7.36E-05 | 0 |
| chrX | 1E+08    | 1E+08    | 524 | 511 | 1E+08    | 0.232207 | 0.001702 | 0 |
| chrX | 1.01E+08 | 1.01E+08 | 391 | 522 | 1.01E+08 | -0.22092 | 0.002904 | 0 |
| chrX | 1.01E+08 | 1.01E+08 | 404 | 530 | 1.01E+08 | -0.19567 | 0.007199 | 0 |
| chrX | 1.01E+08 | 1.01E+08 | 360 | 506 | 1.01E+08 | -0.29518 | 0.000123 | 0 |
| chrX | 1.02E+08 | 1.02E+08 | 26  | 38  | 1.02E+08 | -0.35152 | 6.99E-06 | 0 |
| chrX | 1.02E+08 | 1.02E+08 | 24  | 22  | 1.02E+08 | 0.321494 | 2.63E-05 | 0 |
| chrX | 1.02E+08 | 1.02E+08 | 37  | 33  | 1.02E+08 | 0.361022 | 2.91E-06 | 0 |
| chrX | 1.02E+08 | 1.02E+08 | 393 | 518 | 1.02E+08 | -0.20246 | 0.005687 | 0 |
| chrX | 1.03E+08 | 1.03E+08 | 443 | 579 | 1.03E+08 | -0.19029 | 0.008641 | 0 |
| chrX | 1.03E+08 | 1.03E+08 | 349 | 466 | 1.03E+08 | -0.22114 | 0.00288  | 0 |
| chrX | 1.03E+08 | 1.03E+08 | 271 | 356 | 1.03E+08 | -0.19762 | 0.006732 | 0 |
| chrX | 1.03E+08 | 1.03E+08 | 319 | 418 | 1.03E+08 | -0.19398 | 0.007627 | 0 |
| chrX | 1.04E+08 | 1.04E+08 | 416 | 564 | 1.04E+08 | -0.24315 | 0.001217 | 0 |
| chrX | 1.04E+08 | 1.04E+08 | 428 | 564 | 1.04E+08 | -0.20212 | 0.005755 | 0 |
| chrX | 1.04E+08 | 1.04E+08 | 385 | 510 | 1.04E+08 | -0.20968 | 0.004397 | 0 |

|      |          |          |     |     |          |          |          |   |
|------|----------|----------|-----|-----|----------|----------|----------|---|
| chrX | 1.04E+08 | 1.04E+08 | 361 | 534 | 1.04E+08 | -0.36888 | 2.66E-06 | 0 |
| chrX | 1.04E+08 | 1.04E+08 | 376 | 530 | 1.04E+08 | -0.2993  | 0.000101 | 0 |
| chrX | 1.04E+08 | 1.04E+08 | 401 | 535 | 1.04E+08 | -0.21997 | 0.003009 | 0 |
| chrX | 1.04E+08 | 1.04E+08 | 398 | 543 | 1.04E+08 | -0.25222 | 0.000838 | 0 |
| chrX | 1.04E+08 | 1.04E+08 | 368 | 525 | 1.04E+08 | -0.31665 | 4.33E-05 | 0 |
| chrX | 1.04E+08 | 1.04E+08 | 311 | 420 | 1.04E+08 | -0.23751 | 0.001527 | 0 |
| chrX | 1.04E+08 | 1.05E+08 | 412 | 552 | 1.04E+08 | -0.22606 | 0.002389 | 0 |
| chrX | 1.1E+08  | 1.1E+08  | 402 | 401 | 1.1E+08  | 0.199556 | 0.005893 | 0 |
| chrX | 1.1E+08  | 1.1E+08  | 434 | 577 | 1.1E+08  | -0.21491 | 0.003632 | 0 |
| chrX | 1.11E+08 | 1.12E+08 | 204 | 280 | 1.11E+08 | -0.26089 | 0.00058  | 0 |
| chrX | 1.11E+08 | 1.12E+08 | 195 | 285 | 1.12E+08 | -0.35152 | 6.99E-06 | 0 |
| chrX | 1.12E+08 | 1.12E+08 | 186 | 285 | 1.12E+08 | -0.4197  | 1.28E-07 | 0 |
| chrX | 1.12E+08 | 1.12E+08 | 176 | 244 | 1.12E+08 | -0.27534 | 0.000308 | 0 |
| chrX | 1.12E+08 | 1.12E+08 | 194 | 262 | 1.12E+08 | -0.23755 | 0.001525 | 0 |
| chrX | 1.12E+08 | 1.12E+08 | 225 | 311 | 1.12E+08 | -0.27103 | 0.000373 | 0 |
| chrX | 1.12E+08 | 1.12E+08 | 240 | 328 | 1.12E+08 | -0.2547  | 0.000755 | 0 |
| chrX | 1.12E+08 | 1.12E+08 | 222 | 302 | 1.12E+08 | -0.24803 | 0.000997 | 0 |
| chrX | 1.12E+08 | 1.12E+08 | 199 | 268 | 1.12E+08 | -0.2335  | 0.00179  | 0 |
| chrX | 1.12E+08 | 1.12E+08 | 192 | 260 | 1.12E+08 | -0.24144 | 0.001304 | 0 |
| chrX | 1.12E+08 | 1.12E+08 | 186 | 253 | 1.12E+08 | -0.24787 | 0.001003 | 0 |
| chrX | 1.12E+08 | 1.13E+08 | 178 | 253 | 1.12E+08 | -0.3113  | 5.65E-05 | 0 |
| chrX | 1.13E+08 | 1.13E+08 | 251 | 253 | 1.13E+08 | 0.184513 | 0.009925 | 0 |
| chrX | 1.13E+08 | 1.13E+08 | 226 | 296 | 1.13E+08 | -0.19331 | 0.007803 | 0 |
| chrX | 1.13E+08 | 1.13E+08 | 204 | 288 | 1.13E+08 | -0.30154 | 9.11E-05 | 0 |
| chrX | 1.14E+08 | 1.14E+08 | 239 | 239 | 1.14E+08 | 0.195963 | 0.006694 | 0 |
| chrX | 1.14E+08 | 1.14E+08 | 205 | 272 | 1.14E+08 | -0.21202 | 0.004038 | 0 |
| chrX | 1.15E+08 | 1.15E+08 | 242 | 317 | 1.15E+08 | -0.19351 | 0.00775  | 0 |
| chrX | 1.15E+08 | 1.15E+08 | 206 | 288 | 1.15E+08 | -0.28746 | 0.000177 | 0 |
| chrX | 1.15E+08 | 1.15E+08 | 164 | 165 | 1.15E+08 | 0.187193 | 0.009066 | 0 |
| chrX | 1.15E+08 | 1.15E+08 | 172 | 233 | 1.15E+08 | -0.24196 | 0.001277 | 0 |
| chrX | 1.15E+08 | 1.15E+08 | 191 | 252 | 1.15E+08 | -0.20389 | 0.005408 | 0 |
| chrX | 1.16E+08 | 1.16E+08 | 253 | 332 | 1.16E+08 | -0.19608 | 0.007099 | 0 |
| chrX | 1.16E+08 | 1.16E+08 | 231 | 326 | 1.16E+08 | -0.30102 | 9.34E-05 | 0 |
| chrX | 1.16E+08 | 1.16E+08 | 137 | 136 | 1.16E+08 | 0.206532 | 0.004577 | 0 |
| chrX | 1.16E+08 | 1.16E+08 | 248 | 243 | 1.16E+08 | 0.225347 | 0.002237 | 0 |
| chrX | 1.16E+08 | 1.16E+08 | 188 | 261 | 1.16E+08 | -0.27735 | 0.000281 | 0 |
| chrX | 1.17E+08 | 1.17E+08 | 205 | 290 | 1.17E+08 | -0.30447 | 7.90E-05 | 0 |
| chrX | 1.17E+08 | 1.17E+08 | 201 | 269 | 1.17E+08 | -0.22445 | 0.002541 | 0 |
| chrX | 1.17E+08 | 1.17E+08 | 190 | 281 | 1.17E+08 | -0.36861 | 2.70E-06 | 0 |
| chrX | 1.18E+08 | 1.18E+08 | 253 | 235 | 1.18E+08 | 0.30244  | 7.05E-05 | 0 |
| chrX | 1.18E+08 | 1.18E+08 | 278 | 275 | 1.18E+08 | 0.211616 | 0.003791 | 0 |
| chrX | 1.18E+08 | 1.18E+08 | 233 | 312 | 1.18E+08 | -0.22525 | 0.002464 | 0 |
| chrX | 1.18E+08 | 1.18E+08 | 242 | 316 | 1.18E+08 | -0.18895 | 0.009037 | 0 |
| chrX | 1.19E+08 | 1.19E+08 | 285 | 280 | 1.19E+08 | 0.221498 | 0.002601 | 0 |
| chrX | 1.19E+08 | 1.19E+08 | 316 | 311 | 1.19E+08 | 0.218973 | 0.002867 | 0 |
| chrX | 1.19E+08 | 1.19E+08 | 288 | 273 | 1.19E+08 | 0.273131 | 0.00029  | 0 |
| chrX | 1.19E+08 | 1.19E+08 | 282 | 269 | 1.19E+08 | 0.264052 | 0.000438 | 0 |



|      |          |          |     |     |          |          |          |   |
|------|----------|----------|-----|-----|----------|----------|----------|---|
| chrX | 1.19E+08 | 1.19E+08 | 250 | 251 | 1.19E+08 | 0.190204 | 0.008179 | 0 |
| chrX | 1.2E+08  | 1.2E+08  | 304 | 292 | 1.2E+08  | 0.254066 | 0.000681 | 0 |
| chrX | 1.2E+08  | 1.2E+08  | 11  | 7   | 1.2E+08  | 0.84804  | 1.20E-24 | 0 |
| chrX | 1.2E+08  | 1.2E+08  | 75  | 70  | 1.2E+08  | 0.295499 | 9.96E-05 | 0 |
| chrX | 1.2E+08  | 1.2E+08  | 194 | 276 | 1.2E+08  | -0.31265 | 5.29E-05 | 0 |
| chrX | 1.2E+08  | 1.21E+08 | 201 | 274 | 1.2E+08  | -0.25102 | 0.000881 | 0 |
| chrX | 1.21E+08 | 1.21E+08 | 169 | 235 | 1.21E+08 | -0.27967 | 0.000253 | 0 |
| chrX | 1.21E+08 | 1.21E+08 | 189 | 263 | 1.21E+08 | -0.28071 | 0.000242 | 0 |
| chrX | 1.21E+08 | 1.21E+08 | 183 | 273 | 1.21E+08 | -0.38109 | 1.32E-06 | 0 |
| chrX | 1.21E+08 | 1.21E+08 | 181 | 277 | 1.21E+08 | -0.41793 | 1.43E-07 | 0 |
| chrX | 1.21E+08 | 1.22E+08 | 171 | 226 | 1.22E+08 | -0.20636 | 0.004952 | 0 |
| chrX | 1.22E+08 | 1.22E+08 | 197 | 266 | 1.22E+08 | -0.23727 | 0.001542 | 0 |
| chrX | 1.22E+08 | 1.22E+08 | 198 | 270 | 1.22E+08 | -0.2515  | 0.000863 | 0 |
| chrX | 1.22E+08 | 1.22E+08 | 174 | 249 | 1.22E+08 | -0.3211  | 3.46E-05 | 0 |
| chrX | 1.22E+08 | 1.22E+08 | 189 | 267 | 1.22E+08 | -0.30249 | 8.70E-05 | 0 |
| chrX | 1.22E+08 | 1.22E+08 | 197 | 280 | 1.22E+08 | -0.31127 | 5.66E-05 | 0 |
| chrX | 1.22E+08 | 1.22E+08 | 191 | 252 | 1.22E+08 | -0.20389 | 0.005408 | 0 |
| chrX | 1.22E+08 | 1.22E+08 | 206 | 271 | 1.22E+08 | -0.19969 | 0.006267 | 0 |
| chrX | 1.22E+08 | 1.22E+08 | 189 | 278 | 1.22E+08 | -0.36074 | 4.21E-06 | 0 |
| chrX | 1.22E+08 | 1.22E+08 | 208 | 304 | 1.22E+08 | -0.35152 | 6.99E-06 | 0 |
| chrX | 1.22E+08 | 1.22E+08 | 265 | 353 | 1.22E+08 | -0.21771 | 0.003274 | 0 |
| chrX | 1.23E+08 | 1.23E+08 | 219 | 288 | 1.23E+08 | -0.19917 | 0.00638  | 0 |
| chrX | 1.23E+08 | 1.23E+08 | 293 | 288 | 1.23E+08 | 0.220795 | 0.002673 | 0 |
| chrX | 1.23E+08 | 1.23E+08 | 251 | 349 | 1.23E+08 | -0.27958 | 0.000254 | 0 |
| chrX | 1.24E+08 | 1.24E+08 | 224 | 293 | 1.24E+08 | -0.19144 | 0.008314 | 0 |
| chrX | 1.24E+08 | 1.24E+08 | 220 | 294 | 1.24E+08 | -0.22235 | 0.002751 | 0 |
| chrX | 1.24E+08 | 1.24E+08 | 217 | 295 | 1.24E+08 | -0.24706 | 0.001038 | 0 |
| chrX | 1.24E+08 | 1.24E+08 | 204 | 273 | 1.24E+08 | -0.22437 | 0.002548 | 0 |
| chrX | 1.25E+08 | 1.25E+08 | 210 | 211 | 1.25E+08 | 0.189109 | 0.008493 | 0 |
| chrX | 1.25E+08 | 1.25E+08 | 199 | 260 | 1.25E+08 | -0.18978 | 0.008791 | 0 |
| chrX | 1.25E+08 | 1.25E+08 | 176 | 245 | 1.25E+08 | -0.28124 | 0.000236 | 0 |
| chrX | 1.25E+08 | 1.25E+08 | 188 | 261 | 1.25E+08 | -0.27735 | 0.000281 | 0 |
| chrX | 1.25E+08 | 1.25E+08 | 188 | 248 | 1.25E+08 | -0.20364 | 0.005455 | 0 |
| chrX | 1.25E+08 | 1.25E+08 | 168 | 244 | 1.25E+08 | -0.34246 | 1.14E-05 | 0 |
| chrX | 1.25E+08 | 1.25E+08 | 166 | 257 | 1.25E+08 | -0.43462 | 4.97E-08 | 0 |
| chrX | 1.26E+08 | 1.26E+08 | 182 | 251 | 1.26E+08 | -0.26779 | 0.00043  | 0 |
| chrX | 1.26E+08 | 1.26E+08 | 186 | 264 | 1.26E+08 | -0.30927 | 6.25E-05 | 0 |
| chrX | 1.26E+08 | 1.26E+08 | 192 | 263 | 1.26E+08 | -0.25799 | 0.000657 | 0 |
| chrX | 1.26E+08 | 1.26E+08 | 186 | 251 | 1.26E+08 | -0.23642 | 0.001595 | 0 |
| chrX | 1.26E+08 | 1.26E+08 | 183 | 244 | 1.26E+08 | -0.21907 | 0.003112 | 0 |
| chrX | 1.26E+08 | 1.26E+08 | 178 | 232 | 1.26E+08 | -0.18628 | 0.009875 | 0 |
| chrX | 1.26E+08 | 1.27E+08 | 176 | 240 | 1.27E+08 | -0.2515  | 0.000863 | 0 |
| chrX | 1.27E+08 | 1.27E+08 | 182 | 262 | 1.27E+08 | -0.32967 | 2.23E-05 | 0 |
| chrX | 1.27E+08 | 1.28E+08 | 190 | 268 | 1.27E+08 | -0.30027 | 9.68E-05 | 0 |
| chrX | 1.28E+08 | 1.28E+08 | 190 | 258 | 1.28E+08 | -0.24541 | 0.00111  | 0 |
| chrX | 1.28E+08 | 1.28E+08 | 203 | 271 | 1.28E+08 | -0.22085 | 0.002912 | 0 |
| chrX | 1.28E+08 | 1.28E+08 | 204 | 278 | 1.28E+08 | -0.25055 | 0.000898 | 0 |

|      |          |          |     |     |          |          |          |   |
|------|----------|----------|-----|-----|----------|----------|----------|---|
| chrX | 1.28E+08 | 1.28E+08 | 191 | 255 | 1.28E+08 | -0.22096 | 0.002899 | 0 |
| chrX | 1.28E+08 | 1.28E+08 | 211 | 297 | 1.28E+08 | -0.29726 | 0.000112 | 0 |
| chrX | 1.28E+08 | 1.28E+08 | 209 | 279 | 1.28E+08 | -0.2208  | 0.002917 | 0 |
| chrX | 1.28E+08 | 1.28E+08 | 200 | 264 | 1.28E+08 | -0.20457 | 0.005278 | 0 |
| chrX | 1.29E+08 | 1.29E+08 | 197 | 258 | 1.29E+08 | -0.19321 | 0.00783  | 0 |
| chrX | 1.29E+08 | 1.29E+08 | 359 | 354 | 1.29E+08 | 0.216198 | 0.003189 | 0 |
| chrX | 1.3E+08  | 1.3E+08  | 246 | 328 | 1.3E+08  | -0.21907 | 0.003112 | 0 |
| chrX | 1.3E+08  | 1.3E+08  | 236 | 314 | 1.3E+08  | -0.21601 | 0.003487 | 0 |
| chrX | 1.31E+08 | 1.31E+08 | 210 | 201 | 1.31E+08 | 0.259157 | 0.000545 | 0 |
| chrX | 1.31E+08 | 1.31E+08 | 255 | 333 | 1.31E+08 | -0.18906 | 0.009004 | 0 |
| chrX | 1.31E+08 | 1.31E+08 | 311 | 311 | 1.31E+08 | 0.195963 | 0.006694 | 0 |
| chrX | 1.32E+08 | 1.32E+08 | 262 | 369 | 1.32E+08 | -0.29809 | 0.000107 | 0 |
| chrX | 1.32E+08 | 1.32E+08 | 256 | 349 | 1.32E+08 | -0.25112 | 0.000877 | 0 |
| chrX | 1.32E+08 | 1.32E+08 | 250 | 327 | 1.32E+08 | -0.1914  | 0.008325 | 0 |
| chrX | 1.32E+08 | 1.32E+08 | 223 | 298 | 1.32E+08 | -0.22231 | 0.002756 | 0 |
| chrX | 1.32E+08 | 1.32E+08 | 232 | 313 | 1.32E+08 | -0.23607 | 0.001617 | 0 |
| chrX | 1.33E+08 | 1.33E+08 | 207 | 275 | 1.33E+08 | -0.21384 | 0.003778 | 0 |
| chrX | 1.33E+08 | 1.33E+08 | 205 | 294 | 1.33E+08 | -0.32423 | 2.95E-05 | 0 |
| chrX | 1.33E+08 | 1.33E+08 | 235 | 315 | 1.33E+08 | -0.22673 | 0.002328 | 0 |
| chrX | 1.33E+08 | 1.33E+08 | 227 | 297 | 1.33E+08 | -0.19181 | 0.008211 | 0 |
| chrX | 1.33E+08 | 1.33E+08 | 240 | 317 | 1.33E+08 | -0.20549 | 0.00511  | 0 |
| chrX | 1.34E+08 | 1.34E+08 | 345 | 334 | 1.34E+08 | 0.242711 | 0.001105 | 0 |
| chrX | 1.34E+08 | 1.34E+08 | 293 | 295 | 1.34E+08 | 0.186149 | 0.009393 | 0 |
| chrX | 1.34E+08 | 1.34E+08 | 320 | 312 | 1.34E+08 | 0.232489 | 0.001683 | 0 |
| chrX | 1.35E+08 | 1.35E+08 | 153 | 201 | 1.35E+08 | -0.1977  | 0.006714 | 0 |
| chrX | 1.35E+08 | 1.35E+08 | 77  | 108 | 1.35E+08 | -0.29214 | 0.000142 | 0 |
| chrX | 1.35E+08 | 1.35E+08 | 34  | 34  | 1.35E+08 | 0.195963 | 0.006694 | 0 |
| chrX | 1.35E+08 | 1.35E+08 | 96  | 96  | 1.35E+08 | 0.195963 | 0.006694 | 0 |
| chrX | 1.35E+08 | 1.35E+08 | 196 | 184 | 1.35E+08 | 0.287111 | 0.00015  | 0 |
| chrX | 1.35E+08 | 1.35E+08 | 286 | 287 | 1.35E+08 | 0.190927 | 0.007978 | 0 |
| chrX | 1.35E+08 | 1.35E+08 | 342 | 337 | 1.35E+08 | 0.217211 | 0.003068 | 0 |
| chrX | 1.35E+08 | 1.35E+08 | 349 | 348 | 1.35E+08 | 0.200103 | 0.005779 | 0 |
| chrX | 1.36E+08 | 1.36E+08 | 260 | 345 | 1.36E+08 | -0.21212 | 0.004023 | 0 |
| chrX | 1.36E+08 | 1.36E+08 | 273 | 248 | 1.36E+08 | 0.334524 | 1.31E-05 | 0 |
| chrX | 1.36E+08 | 1.36E+08 | 265 | 248 | 1.36E+08 | 0.291615 | 0.00012  | 0 |
| chrX | 1.36E+08 | 1.36E+08 | 248 | 325 | 1.36E+08 | -0.19414 | 0.007587 | 0 |
| chrX | 1.36E+08 | 1.36E+08 | 236 | 333 | 1.36E+08 | -0.30077 | 9.45E-05 | 0 |
| chrX | 1.36E+08 | 1.36E+08 | 206 | 318 | 1.36E+08 | -0.43042 | 6.51E-08 | 0 |
| chrX | 1.36E+08 | 1.36E+08 | 201 | 293 | 1.36E+08 | -0.34774 | 8.58E-06 | 0 |
| chrX | 1.36E+08 | 1.37E+08 | 225 | 300 | 1.36E+08 | -0.21907 | 0.003112 | 0 |
| chrX | 1.37E+08 | 1.37E+08 | 294 | 385 | 1.37E+08 | -0.19308 | 0.007865 | 0 |
| chrX | 1.37E+08 | 1.37E+08 | 177 | 243 | 1.37E+08 | -0.26124 | 0.000572 | 0 |
| chrX | 1.37E+08 | 1.37E+08 | 175 | 233 | 1.37E+08 | -0.21701 | 0.003361 | 0 |
| chrX | 1.37E+08 | 1.37E+08 | 189 | 259 | 1.37E+08 | -0.2586  | 0.00064  | 0 |
| chrX | 1.37E+08 | 1.37E+08 | 158 | 223 | 1.37E+08 | -0.30116 | 9.27E-05 | 0 |
| chrX | 1.37E+08 | 1.37E+08 | 166 | 234 | 1.37E+08 | -0.29936 | 0.000101 | 0 |
| chrX | 1.37E+08 | 1.37E+08 | 162 | 240 | 1.37E+08 | -0.37108 | 2.35E-06 | 0 |

|      |          |          |     |     |          |          |          |   |
|------|----------|----------|-----|-----|----------|----------|----------|---|
| chrX | 1.37E+08 | 1.37E+08 | 203 | 279 | 1.37E+08 | -0.26282 | 0.000534 | 0 |
| chrX | 1.38E+08 | 1.38E+08 | 172 | 238 | 1.38E+08 | -0.27259 | 0.000348 | 0 |
| chrX | 1.38E+08 | 1.38E+08 | 189 | 247 | 1.38E+08 | -0.19016 | 0.008679 | 0 |
| chrX | 1.38E+08 | 1.38E+08 | 182 | 247 | 1.38E+08 | -0.24461 | 0.001147 | 0 |
| chrX | 1.38E+08 | 1.39E+08 | 170 | 247 | 1.39E+08 | -0.34301 | 1.11E-05 | 0 |
| chrX | 1.39E+08 | 1.39E+08 | 198 | 270 | 1.39E+08 | -0.2515  | 0.000863 | 0 |
| chrX | 1.39E+08 | 1.39E+08 | 187 | 256 | 1.39E+08 | -0.25714 | 0.000681 | 0 |
| chrX | 1.39E+08 | 1.39E+08 | 181 | 246 | 1.39E+08 | -0.24671 | 0.001053 | 0 |
| chrX | 1.39E+08 | 1.39E+08 | 163 | 231 | 1.39E+08 | -0.30706 | 6.96E-05 | 0 |
| chrX | 1.39E+08 | 1.39E+08 | 151 | 210 | 1.39E+08 | -0.27988 | 0.000251 | 0 |
| chrX | 1.39E+08 | 1.39E+08 | 181 | 237 | 1.39E+08 | -0.19293 | 0.007904 | 0 |
| chrX | 1.39E+08 | 1.39E+08 | 160 | 217 | 1.39E+08 | -0.24366 | 0.001192 | 0 |
| chrX | 1.4E+08  | 1.4E+08  | 186 | 244 | 1.4E+08  | -0.19562 | 0.007213 | 0 |
| chrX | 1.4E+08  | 1.4E+08  | 193 | 263 | 1.40E+08 | -0.2505  | 0.0009   | 0 |
| chrX | 1.4E+08  | 1.4E+08  | 152 | 204 | 1.4E+08  | -0.22853 | 0.002172 | 0 |
| chrX | 1.4E+08  | 1.4E+08  | 1   | 3   | 1.4E+08  | -1.389   | 6.26E-48 | 0 |
| chrX | 1.4E+08  | 1.4E+08  | 69  | 112 | 1.4E+08  | -0.50287 | 4.74E-10 | 0 |
| chrX | 1.4E+08  | 1.4E+08  | 165 | 232 | 1.4E+08  | -0.2957  | 0.00012  | 0 |
| chrX | 1.4E+08  | 1.4E+08  | 145 | 191 | 1.4E+08  | -0.20156 | 0.005871 | 0 |
| chrX | 1.41E+08 | 1.41E+08 | 20  | 34  | 1.41E+08 | -0.56957 | 3.13E-12 | 0 |
| chrX | 1.41E+08 | 1.41E+08 | 117 | 160 | 1.41E+08 | -0.2556  | 0.000727 | 0 |
| chrX | 1.41E+08 | 1.41E+08 | 135 | 196 | 1.41E+08 | -0.34193 | 1.17E-05 | 0 |
| chrX | 1.41E+08 | 1.41E+08 | 117 | 177 | 1.41E+08 | -0.40128 | 3.99E-07 | 0 |
| chrX | 1.41E+08 | 1.41E+08 | 150 | 206 | 1.41E+08 | -0.26172 | 0.00056  | 0 |
| chrX | 1.41E+08 | 1.41E+08 | 185 | 257 | 1.41E+08 | -0.27828 | 0.00027  | 0 |
| chrX | 1.41E+08 | 1.41E+08 | 152 | 258 | 1.41E+08 | -0.56734 | 3.73E-12 | 0 |
| chrX | 1.41E+08 | 1.42E+08 | 144 | 238 | 1.41E+08 | -0.52893 | 7.03E-11 | 0 |
| chrX | 1.41E+08 | 1.42E+08 | 158 | 226 | 1.42E+08 | -0.32044 | 3.58E-05 | 0 |
| chrX | 1.42E+08 | 1.42E+08 | 192 | 251 | 1.42E+08 | -0.19062 | 0.008547 | 0 |
| chrX | 1.42E+08 | 1.42E+08 | 171 | 236 | 1.42E+08 | -0.26883 | 0.000411 | 0 |
| chrX | 1.42E+08 | 1.42E+08 | 158 | 219 | 1.42E+08 | -0.27504 | 0.000312 | 0 |
| chrX | 1.42E+08 | 1.42E+08 | 163 | 220 | 1.42E+08 | -0.23667 | 0.001579 | 0 |
| chrX | 1.42E+08 | 1.42E+08 | 200 | 262 | 1.42E+08 | -0.1936  | 0.007726 | 0 |
| chrX | 1.42E+08 | 1.43E+08 | 156 | 229 | 1.42E+08 | -0.35784 | 4.94E-06 | 0 |
| chrX | 1.42E+08 | 1.43E+08 | 164 | 242 | 1.43E+08 | -0.36535 | 3.25E-06 | 0 |
| chrX | 1.43E+08 | 1.43E+08 | 186 | 258 | 1.43E+08 | -0.27611 | 0.000298 | 0 |
| chrX | 1.43E+08 | 1.43E+08 | 195 | 268 | 1.43E+08 | -0.2628  | 0.000535 | 0 |
| chrX | 1.43E+08 | 1.43E+08 | 195 | 255 | 1.43E+08 | -0.19106 | 0.008421 | 0 |
| chrX | 1.43E+08 | 1.43E+08 | 170 | 247 | 1.43E+08 | -0.34301 | 1.11E-05 | 0 |
| chrX | 1.43E+08 | 1.43E+08 | 179 | 265 | 1.43E+08 | -0.37007 | 2.49E-06 | 0 |
| chrX | 1.43E+08 | 1.43E+08 | 22  | 33  | 1.43E+08 | -0.389   | 8.31E-07 | 0 |
| chrX | 1.43E+08 | 1.43E+08 | 13  | 12  | 1.43E+08 | 0.31144  | 4.46E-05 | 0 |
| chrX | 1.43E+08 | 1.43E+08 | 199 | 279 | 1.43E+08 | -0.29153 | 0.000147 | 0 |
| chrX | 1.43E+08 | 1.44E+08 | 101 | 156 | 1.44E+08 | -0.43123 | 6.18E-08 | 0 |
| chrX | 1.44E+08 | 1.44E+08 | 92  | 133 | 1.44E+08 | -0.33576 | 1.62E-05 | 0 |
| chrX | 1.44E+08 | 1.44E+08 | 167 | 245 | 1.44E+08 | -0.35697 | 5.18E-06 | 0 |
| chrX | 1.44E+08 | 1.44E+08 | 190 | 257 | 1.44E+08 | -0.23981 | 0.001393 | 0 |

|      |          |          |     |     |          |          |          |   |
|------|----------|----------|-----|-----|----------|----------|----------|---|
| chrX | 1.44E+08 | 1.44E+08 | 171 | 233 | 1.44E+08 | -0.25037 | 0.000905 | 0 |
| chrX | 1.44E+08 | 1.44E+08 | 167 | 261 | 1.44E+08 | -0.44824 | 2.05E-08 | 0 |
| chrX | 1.44E+08 | 1.44E+08 | 182 | 271 | 1.44E+08 | -0.37839 | 1.55E-06 | 0 |
| chrX | 1.44E+08 | 1.44E+08 | 189 | 260 | 1.44E+08 | -0.26416 | 0.000504 | 0 |
| chrX | 1.44E+08 | 1.44E+08 | 186 | 244 | 1.44E+08 | -0.19562 | 0.007213 | 0 |
| chrX | 1.45E+08 | 1.45E+08 | 191 | 257 | 1.45E+08 | -0.23223 | 0.001881 | 0 |
| chrX | 1.45E+08 | 1.45E+08 | 172 | 247 | 1.45E+08 | -0.32614 | 2.68E-05 | 0 |
| chrX | 1.45E+08 | 1.45E+08 | 173 | 248 | 1.45E+08 | -0.32361 | 3.05E-05 | 0 |
| chrX | 1.45E+08 | 1.46E+08 | 198 | 260 | 1.46E+08 | -0.19705 | 0.006867 | 0 |
| chrX | 1.46E+08 | 1.46E+08 | 181 | 256 | 1.46E+08 | -0.30419 | 8.01E-05 | 0 |
| chrX | 1.46E+08 | 1.46E+08 | 209 | 276 | 1.46E+08 | -0.2052  | 0.005162 | 0 |
| chrX | 1.46E+08 | 1.46E+08 | 207 | 271 | 1.46E+08 | -0.1927  | 0.007967 | 0 |
| chrX | 1.46E+08 | 1.46E+08 | 181 | 242 | 1.46E+08 | -0.22305 | 0.002679 | 0 |
| chrX | 1.46E+08 | 1.46E+08 | 180 | 246 | 1.46E+08 | -0.2547  | 0.000755 | 0 |
| chrX | 1.46E+08 | 1.46E+08 | 179 | 235 | 1.46E+08 | -0.19674 | 0.006941 | 0 |
| chrX | 1.46E+08 | 1.46E+08 | 182 | 240 | 1.46E+08 | -0.20313 | 0.005554 | 0 |
| chrX | 1.46E+08 | 1.46E+08 | 184 | 251 | 1.46E+08 | -0.25202 | 0.000845 | 0 |
| chrX | 1.46E+08 | 1.46E+08 | 142 | 236 | 1.46E+08 | -0.53693 | 3.86E-11 | 0 |
| chrX | 1.46E+08 | 1.46E+08 | 155 | 227 | 1.46E+08 | -0.35446 | 5.95E-06 | 0 |
| chrX | 1.47E+08 | 1.47E+08 | 216 | 285 | 1.47E+08 | -0.20397 | 0.005393 | 0 |
| chrX | 1.47E+08 | 1.47E+08 | 194 | 272 | 1.47E+08 | -0.29159 | 0.000146 | 0 |
| chrX | 1.47E+08 | 1.47E+08 | 194 | 278 | 1.47E+08 | -0.32307 | 3.13E-05 | 0 |
| chrX | 1.47E+08 | 1.47E+08 | 186 | 277 | 1.47E+08 | -0.37862 | 1.53E-06 | 0 |
| chrX | 1.47E+08 | 1.47E+08 | 236 | 235 | 1.47E+08 | 0.202089 | 0.005381 | 0 |
| chrX | 1.47E+08 | 1.47E+08 | 159 | 222 | 1.47E+08 | -0.28557 | 0.000193 | 0 |
| chrX | 1.47E+08 | 1.48E+08 | 177 | 234 | 1.47E+08 | -0.2068  | 0.004876 | 0 |
| chrX | 1.48E+08 | 1.48E+08 | 224 | 295 | 1.48E+08 | -0.20125 | 0.005933 | 0 |
| chrX | 1.48E+08 | 1.48E+08 | 181 | 243 | 1.48E+08 | -0.229   | 0.002133 | 0 |
| chrX | 1.48E+08 | 1.48E+08 | 171 | 230 | 1.48E+08 | -0.23167 | 0.001922 | 0 |
| chrX | 1.48E+08 | 1.48E+08 | 222 | 293 | 1.48E+08 | -0.20438 | 0.005315 | 0 |
| chrX | 1.48E+08 | 1.49E+08 | 198 | 273 | 1.49E+08 | -0.26744 | 0.000437 | 0 |
| chrX | 1.49E+08 | 1.49E+08 | 60  | 90  | 1.49E+08 | -0.389   | 8.31E-07 | 0 |
| chrX | 1.49E+08 | 1.49E+08 | 199 | 193 | 1.49E+08 | 0.240131 | 0.001231 | 0 |
| chrX | 1.49E+08 | 1.49E+08 | 87  | 73  | 1.49E+08 | 0.449082 | 1.01E-08 | 0 |
| chrX | 1.49E+08 | 1.5E+08  | 343 | 339 | 1.5E+08  | 0.212886 | 0.003615 | 0 |
| chrX | 1.5E+08  | 1.5E+08  | 314 | 316 | 1.5E+08  | 0.186803 | 0.009187 | 0 |
| chrX | 1.5E+08  | 1.5E+08  | 379 | 375 | 1.5E+08  | 0.21127  | 0.00384  | 0 |
| chrX | 1.5E+08  | 1.5E+08  | 259 | 361 | 1.5E+08  | -0.28308 | 0.000217 | 0 |
| chrX | 1.51E+08 | 1.51E+08 | 224 | 298 | 1.51E+08 | -0.21585 | 0.003508 | 0 |
| chrX | 1.51E+08 | 1.51E+08 | 350 | 346 | 1.51E+08 | 0.212546 | 0.003661 | 0 |
| chrX | 1.51E+08 | 1.51E+08 | 325 | 305 | 1.51E+08 | 0.287594 | 0.000146 | 0 |
| chrX | 1.51E+08 | 1.51E+08 | 348 | 304 | 1.51E+08 | 0.390979 | 4.76E-07 | 0 |
| chrX | 1.51E+08 | 1.51E+08 | 227 | 354 | 1.51E+08 | -0.44509 | 2.52E-08 | 0 |
| chrX | 1.51E+08 | 1.51E+08 | 243 | 382 | 1.51E+08 | -0.45665 | 1.17E-08 | 0 |
| chrX | 1.52E+08 | 1.52E+08 | 218 | 301 | 1.52E+08 | -0.26947 | 0.0004   | 0 |
| chrX | 1.52E+08 | 1.52E+08 | 38  | 38  | 1.52E+08 | 0.195963 | 0.006694 | 0 |
| chrX | 1.52E+08 | 1.52E+08 | 99  | 99  | 1.52E+08 | 0.195963 | 0.006694 | 0 |

|      |          |          |     |     |          |          |          |   |
|------|----------|----------|-----|-----|----------|----------|----------|---|
| chrX | 1.52E+08 | 1.52E+08 | 1   | 1   | 1.52E+08 | 0.195963 | 0.006694 | 0 |
| chrX | 1.52E+08 | 1.52E+08 | 49  | 75  | 1.52E+08 | -0.41815 | 1.41E-07 | 0 |
| chrX | 1.53E+08 | 1.53E+08 | 162 | 220 | 1.53E+08 | -0.24555 | 0.001104 | 0 |
| chrX | 1.53E+08 | 1.53E+08 | 400 | 396 | 1.53E+08 | 0.210463 | 0.003958 | 0 |
| chrX | 1.53E+08 | 1.53E+08 | 319 | 287 | 1.53E+08 | 0.348469 | 6.00E-06 | 0 |
| chrX | 1.53E+08 | 1.53E+08 | 419 | 396 | 1.53E+08 | 0.277413 | 0.000237 | 0 |
| chrX | 1.53E+08 | 1.53E+08 | 443 | 389 | 1.53E+08 | 0.3835   | 7.57E-07 | 0 |
| chrX | 1.53E+08 | 1.53E+08 | 402 | 358 | 1.53E+08 | 0.363199 | 2.56E-06 | 0 |
| chrX | 1.53E+08 | 1.53E+08 | 386 | 340 | 1.53E+08 | 0.379029 | 9.95E-07 | 0 |
| chrX | 1.53E+08 | 1.53E+08 | 352 | 332 | 1.53E+08 | 0.280355 | 0.000207 | 0 |
| chrX | 1.54E+08 | 1.54E+08 | 288 | 275 | 1.54E+08 | 0.2626   | 0.000467 | 0 |
| chrX | 1.54E+08 | 1.54E+08 | 330 | 285 | 1.54E+08 | 0.407467 | 1.67E-07 | 0 |
| chrX | 1.54E+08 | 1.54E+08 | 366 | 319 | 1.54E+08 | 0.39425  | 3.88E-07 | 0 |
| chrX | 1.54E+08 | 1.54E+08 | 416 | 368 | 1.54E+08 | 0.372841 | 1.45E-06 | 0 |
| chrX | 1.54E+08 | 1.54E+08 | 313 | 286 | 1.54E+08 | 0.326111 | 2.06E-05 | 0 |
| chrX | 1.54E+08 | 1.54E+08 | 185 | 186 | 1.54E+08 | 0.188186 | 0.008765 | 0 |
| chrX | 1.54E+08 | 1.54E+08 | 254 | 336 | 1.54E+08 | -0.20767 | 0.004726 | 0 |
| chrX | 1.54E+08 | 1.54E+08 | 295 | 391 | 1.54E+08 | -0.21049 | 0.004269 | 0 |
| chrX | 1.54E+08 | 1.55E+08 | 264 | 256 | 1.55E+08 | 0.240357 | 0.001219 | 0 |
| chrX | 1.55E+08 | 1.55E+08 | 164 | 164 | 1.55E+08 | 0.195963 | 0.006694 | 0 |
| chrX | 3800001  | 3900000  | 177 | 224 | 3850000  | -0.14379 | 0.035651 | 0 |
| chrX | 4050001  | 4150000  | 434 | 549 | 4100000  | -0.14315 | 0.036278 | 0 |
| chrX | 4150001  | 4250000  | 441 | 573 | 4200000  | -0.18179 | 0.011438 | 0 |
| chrX | 4300001  | 4400000  | 385 | 491 | 4350000  | -0.1549  | 0.026078 | 0 |
| chrX | 4500001  | 4600000  | 392 | 503 | 4550000  | -0.16374 | 0.020101 | 0 |
| chrX | 4550001  | 4650000  | 393 | 502 | 4600000  | -0.1572  | 0.0244   | 0 |
| chrX | 4700001  | 4800000  | 370 | 477 | 4750000  | -0.1705  | 0.016358 | 0 |
| chrX | 4950001  | 5050000  | 400 | 508 | 5.00E+06 | -0.14887 | 0.030967 | 0 |
| chrX | 5050001  | 5150000  | 424 | 543 | 5100000  | -0.16092 | 0.021864 | 0 |
| chrX | 5350001  | 5450000  | 384 | 484 | 5400000  | -0.13794 | 0.041752 | 0 |
| chrX | 5500001  | 5600000  | 424 | 535 | 5550000  | -0.13951 | 0.040032 | 0 |
| chrX | 5600001  | 5700000  | 379 | 486 | 5650000  | -0.1628  | 0.02068  | 0 |
| chrX | 5750001  | 5850000  | 445 | 562 | 5800000  | -0.1408  | 0.038665 | 0 |
| chrX | 6200001  | 6300000  | 412 | 535 | 6250000  | -0.18093 | 0.011762 | 0 |
| chrX | 7600001  | 7700000  | 209 | 270 | 7650000  | -0.17349 | 0.014903 | 0 |
| chrX | 7700001  | 7800000  | 474 | 612 | 7750000  | -0.17268 | 0.015287 | 0 |
| chrX | 7750001  | 7850000  | 421 | 544 | 7800000  | -0.17382 | 0.01475  | 0 |
| chrX | 8050001  | 8150000  | 365 | 460 | 8100000  | -0.13777 | 0.041933 | 0 |
| chrX | 10200001 | 10300000 | 512 | 661 | 10250000 | -0.17254 | 0.015353 | 0 |
| chrX | 10400001 | 10500000 | 508 | 638 | 10450000 | -0.13276 | 0.047833 | 0 |
| chrX | 10600001 | 10700000 | 450 | 568 | 10650000 | -0.14    | 0.039507 | 0 |
| chrX | 11100001 | 11200000 | 607 | 621 | 11150000 | 0.163066 | 0.01975  | 0 |
| chrX | 11400001 | 11500000 | 569 | 721 | 11450000 | -0.14561 | 0.033908 | 0 |
| chrX | 12050001 | 12150000 | 462 | 589 | 12100000 | -0.15441 | 0.026449 | 0 |
| chrX | 12200001 | 12300000 | 482 | 606 | 12250000 | -0.13432 | 0.045932 | 0 |
| chrX | 12550001 | 12650000 | 428 | 553 | 12600000 | -0.17371 | 0.014805 | 0 |
| chrX | 12600001 | 12700000 | 474 | 609 | 12650000 | -0.16559 | 0.01901  | 0 |

|      |          |          |     |     |          |          |          |   |
|------|----------|----------|-----|-----|----------|----------|----------|---|
| chrX | 12650001 | 12750000 | 504 | 654 | 12700000 | -0.1799  | 0.012158 | 0 |
| chrX | 12900001 | 13000000 | 574 | 589 | 12950000 | 0.158746 | 0.022511 | 0 |
| chrX | 13650001 | 13750000 | 566 | 591 | 13700000 | 0.133607 | 0.045775 | 0 |
| chrX | 14550001 | 14650000 | 425 | 547 | 14600000 | -0.16811 | 0.017605 | 0 |
| chrX | 14600001 | 14700000 | 428 | 554 | 14650000 | -0.17631 | 0.013636 | 0 |
| chrX | 16150001 | 16250000 | 497 | 624 | 16200000 | -0.13234 | 0.048366 | 0 |
| chrX | 16400001 | 16500000 | 533 | 687 | 16450000 | -0.17021 | 0.016505 | 0 |
| chrX | 16500001 | 16600000 | 457 | 591 | 16550000 | -0.175   | 0.014214 | 0 |
| chrX | 16900001 | 17000000 | 616 | 640 | 16950000 | 0.140821 | 0.037675 | 0 |
| chrX | 17550001 | 17650000 | 488 | 622 | 17600000 | -0.15407 | 0.02671  | 0 |
| chrX | 17800001 | 17900000 | 538 | 692 | 17850000 | -0.1672  | 0.018102 | 0 |
| chrX | 18000001 | 18100000 | 505 | 636 | 18050000 | -0.13678 | 0.043054 | 0 |
| chrX | 18450001 | 18550000 | 462 | 595 | 18500000 | -0.16903 | 0.017115 | 0 |
| chrX | 19150001 | 19250000 | 442 | 555 | 19200000 | -0.13248 | 0.048189 | 0 |
| chrX | 19900001 | 20000000 | 551 | 573 | 19950000 | 0.13948  | 0.039085 | 0 |
| chrX | 20100001 | 20200000 | 550 | 574 | 20150000 | 0.134344 | 0.044889 | 0 |
| chrX | 20200001 | 20300000 | 560 | 578 | 20250000 | 0.15032  | 0.028836 | 0 |
| chrX | 20700001 | 20800000 | 380 | 486 | 20750000 | -0.15899 | 0.023148 | 0 |
| chrX | 20750001 | 20850000 | 395 | 501 | 20800000 | -0.14699 | 0.032628 | 0 |
| chrX | 20800001 | 20900000 | 409 | 518 | 20850000 | -0.14489 | 0.034588 | 0 |
| chrX | 20900001 | 21000000 | 459 | 578 | 20950000 | -0.13661 | 0.043246 | 0 |
| chrX | 21000001 | 21100000 | 396 | 499 | 21050000 | -0.13758 | 0.042155 | 0 |
| chrX | 22650001 | 22750000 | 441 | 559 | 22700000 | -0.14611 | 0.033443 | 0 |
| chrX | 22850001 | 22950000 | 426 | 537 | 22900000 | -0.13811 | 0.041565 | 0 |
| chrX | 22950001 | 23050000 | 503 | 515 | 2.30E+07 | 0.161949 | 0.020435 | 0 |
| chrX | 23150001 | 23250000 | 491 | 616 | 23200000 | -0.13124 | 0.04975  | 0 |
| chrX | 23250001 | 23350000 | 498 | 627 | 23300000 | -0.13636 | 0.043539 | 0 |
| chrX | 23500001 | 23600000 | 467 | 594 | 23550000 | -0.15108 | 0.029094 | 0 |
| chrX | 23600001 | 23700000 | 605 | 624 | 23650000 | 0.151352 | 0.027989 | 0 |
| chrX | 23650001 | 23750000 | 565 | 591 | 23700000 | 0.131056 | 0.048955 | 0 |
| chrX | 23850001 | 23950000 | 541 | 561 | 23900000 | 0.143591 | 0.034894 | 0 |
| chrX | 24000001 | 24100000 | 499 | 516 | 24050000 | 0.147632 | 0.031142 | 0 |
| chrX | 24100001 | 24200000 | 585 | 601 | 24150000 | 0.157035 | 0.023691 | 0 |
| chrX | 24150001 | 24250000 | 621 | 633 | 24200000 | 0.168351 | 0.016771 | 0 |
| chrX | 24200001 | 24300000 | 605 | 620 | 24250000 | 0.16063  | 0.021269 | 0 |
| chrX | 24700001 | 24800000 | 604 | 626 | 24750000 | 0.144349 | 0.034163 | 0 |
| chrX | 25300001 | 25400000 | 403 | 525 | 25350000 | -0.18557 | 0.010109 | 0 |
| chrX | 25550001 | 25650000 | 476 | 599 | 25600000 | -0.13563 | 0.04438  | 0 |
| chrX | 25950001 | 26050000 | 414 | 520 | 2.60E+07 | -0.13292 | 0.047643 | 0 |
| chrX | 26050001 | 26150000 | 411 | 535 | 26100000 | -0.18444 | 0.010493 | 0 |
| chrX | 26550001 | 26650000 | 440 | 571 | 26600000 | -0.18002 | 0.012111 | 0 |
| chrX | 26600001 | 26700000 | 426 | 544 | 26650000 | -0.15679 | 0.024689 | 0 |
| chrX | 26650001 | 26750000 | 421 | 542 | 26700000 | -0.16851 | 0.017393 | 0 |
| chrX | 26800001 | 26900000 | 429 | 555 | 26850000 | -0.17555 | 0.013971 | 0 |
| chrX | 27400001 | 27500000 | 396 | 506 | 27450000 | -0.15767 | 0.024061 | 0 |
| chrX | 27550001 | 27650000 | 386 | 497 | 27600000 | -0.16868 | 0.017301 | 0 |
| chrX | 27750001 | 27850000 | 421 | 535 | 27800000 | -0.14976 | 0.030201 | 0 |

|      |          |          |     |     |          |          |          |   |
|------|----------|----------|-----|-----|----------|----------|----------|---|
| chrX | 27800001 | 27900000 | 432 | 553 | 27850000 | -0.16029 | 0.022283 | 0 |
| chrX | 27950001 | 28050000 | 434 | 548 | 2.80E+07 | -0.14052 | 0.038963 | 0 |
| chrX | 28100001 | 28200000 | 401 | 510 | 28150000 | -0.15093 | 0.029214 | 0 |
| chrX | 28700001 | 28800000 | 384 | 500 | 28750000 | -0.18486 | 0.010349 | 0 |
| chrX | 28900001 | 29000000 | 394 | 495 | 28950000 | -0.13327 | 0.047209 | 0 |
| chrX | 29100001 | 29200000 | 413 | 526 | 29150000 | -0.15296 | 0.027576 | 0 |
| chrX | 29800001 | 29900000 | 460 | 580 | 29850000 | -0.13846 | 0.041179 | 0 |
| chrX | 29850001 | 29950000 | 455 | 584 | 29900000 | -0.16414 | 0.019863 | 0 |
| chrX | 30200001 | 30300000 | 472 | 611 | 30250000 | -0.17642 | 0.013589 | 0 |
| chrX | 31450001 | 31550000 | 443 | 560 | 31500000 | -0.14216 | 0.037271 | 0 |
| chrX | 31500001 | 31600000 | 437 | 554 | 31550000 | -0.14629 | 0.033274 | 0 |
| chrX | 31650001 | 31750000 | 470 | 591 | 31700000 | -0.13453 | 0.045677 | 0 |
| chrX | 32150001 | 32250000 | 438 | 556 | 32200000 | -0.14819 | 0.031558 | 0 |
| chrX | 32200001 | 32300000 | 417 | 536 | 32250000 | -0.16622 | 0.01865  | 0 |
| chrX | 32550001 | 32650000 | 430 | 550 | 32600000 | -0.15913 | 0.023054 | 0 |
| chrX | 32650001 | 32750000 | 405 | 516 | 32700000 | -0.15349 | 0.027162 | 0 |
| chrX | 33550001 | 33650000 | 397 | 510 | 33600000 | -0.1654  | 0.019124 | 0 |
| chrX | 33700001 | 33800000 | 382 | 485 | 33750000 | -0.14845 | 0.031331 | 0 |
| chrX | 33750001 | 33850000 | 385 | 498 | 33800000 | -0.17532 | 0.014069 | 0 |
| chrX | 33850001 | 33950000 | 401 | 514 | 33900000 | -0.1622  | 0.021049 | 0 |
| chrX | 34350001 | 34450000 | 371 | 470 | 34400000 | -0.14528 | 0.034218 | 0 |
| chrX | 35100001 | 35200000 | 393 | 500 | 35150000 | -0.15144 | 0.028799 | 0 |
| chrX | 35150001 | 35250000 | 402 | 505 | 35200000 | -0.13312 | 0.047388 | 0 |
| chrX | 35200001 | 35300000 | 380 | 493 | 35250000 | -0.17963 | 0.012268 | 0 |
| chrX | 35600001 | 35700000 | 364 | 457 | 35650000 | -0.13229 | 0.048422 | 0 |
| chrX | 35850001 | 35950000 | 394 | 508 | 35900000 | -0.17067 | 0.016273 | 0 |
| chrX | 36350001 | 36450000 | 386 | 490 | 36400000 | -0.14822 | 0.031534 | 0 |
| chrX | 36550001 | 36650000 | 421 | 539 | 36600000 | -0.1605  | 0.02214  | 0 |
| chrX | 36600001 | 36700000 | 407 | 530 | 36650000 | -0.185   | 0.010301 | 0 |
| chrX | 36850001 | 36950000 | 449 | 568 | 36900000 | -0.14321 | 0.036215 | 0 |
| chrX | 36950001 | 37050000 | 326 | 419 | 3.70E+07 | -0.16612 | 0.018711 | 0 |
| chrX | 37050001 | 37150000 | 149 | 194 | 37100000 | -0.18478 | 0.010376 | 0 |
| chrX | 37400001 | 37500000 | 338 | 433 | 37450000 | -0.16138 | 0.02157  | 0 |
| chrX | 37600001 | 37700000 | 449 | 572 | 37650000 | -0.15334 | 0.027279 | 0 |
| chrX | 38550001 | 38650000 | 518 | 538 | 38600000 | 0.141309 | 0.037173 | 0 |
| chrX | 38600001 | 38700000 | 563 | 582 | 38650000 | 0.148079 | 0.030748 | 0 |
| chrX | 38700001 | 38800000 | 477 | 599 | 38750000 | -0.1326  | 0.048033 | 0 |
| chrX | 39000001 | 39100000 | 514 | 647 | 39050000 | -0.13603 | 0.043912 | 0 |
| chrX | 39150001 | 39250000 | 491 | 625 | 39200000 | -0.15217 | 0.028204 | 0 |
| chrX | 39200001 | 39300000 | 494 | 632 | 39250000 | -0.15945 | 0.022838 | 0 |
| chrX | 39850001 | 39950000 | 706 | 733 | 39900000 | 0.141818 | 0.036654 | 0 |
| chrX | 39900001 | 40000000 | 714 | 735 | 39950000 | 0.154143 | 0.025803 | 0 |
| chrX | 39950001 | 40050000 | 699 | 724 | 4.00E+07 | 0.145266 | 0.033296 | 0 |
| chrX | 40700001 | 40800000 | 586 | 596 | 40750000 | 0.171551 | 0.01516  | 0 |
| chrX | 41100001 | 41200000 | 534 | 552 | 41150000 | 0.148135 | 0.0307   | 0 |
| chrX | 41150001 | 41250000 | 570 | 586 | 41200000 | 0.156024 | 0.024412 | 0 |
| chrX | 41400001 | 41500000 | 459 | 586 | 41450000 | -0.15644 | 0.024939 | 0 |

|      |          |          |     |     |          |          |          |   |
|------|----------|----------|-----|-----|----------|----------|----------|---|
| chrX | 41600001 | 41700000 | 515 | 524 | 41650000 | 0.170969 | 0.015443 | 0 |
| chrX | 41800001 | 41900000 | 464 | 586 | 41850000 | -0.14081 | 0.038654 | 0 |
| chrX | 42050001 | 42150000 | 469 | 601 | 42100000 | -0.16181 | 0.021294 | 0 |
| chrX | 42950001 | 43050000 | 445 | 562 | 4.30E+07 | -0.1408  | 0.038665 | 0 |
| chrX | 43550001 | 43650000 | 451 | 580 | 43600000 | -0.16696 | 0.018235 | 0 |
| chrX | 43700001 | 43800000 | 511 | 642 | 43750000 | -0.13329 | 0.047188 | 0 |
| chrX | 45050001 | 45150000 | 450 | 574 | 45100000 | -0.15516 | 0.025883 | 0 |
| chrX | 45450001 | 45550000 | 464 | 583 | 45500000 | -0.13341 | 0.04704  | 0 |
| chrX | 45900001 | 46000000 | 389 | 396 | 45950000 | 0.170233 | 0.015807 | 0 |
| chrX | 46300001 | 46400000 | 413 | 523 | 46350000 | -0.14471 | 0.034761 | 0 |
| chrX | 47250001 | 47350000 | 534 | 670 | 47300000 | -0.13136 | 0.049604 | 0 |
| chrX | 47450001 | 47550000 | 643 | 654 | 47500000 | 0.171491 | 0.015189 | 0 |
| chrX | 48050001 | 48150000 | 223 | 289 | 48100000 | -0.17806 | 0.012898 | 0 |
| chrX | 48450001 | 48550000 | 596 | 618 | 48500000 | 0.143669 | 0.034819 | 0 |
| chrX | 49300001 | 49400000 | 113 | 145 | 49350000 | -0.16377 | 0.020086 | 0 |
| chrX | 50350001 | 50450000 | 458 | 577 | 50400000 | -0.13726 | 0.04251  | 0 |
| chrX | 50700001 | 50800000 | 347 | 441 | 50750000 | -0.14988 | 0.030096 | 0 |
| chrX | 50850001 | 50950000 | 333 | 422 | 50900000 | -0.14576 | 0.033768 | 0 |
| chrX | 51000001 | 51100000 | 335 | 431 | 51050000 | -0.16756 | 0.017904 | 0 |
| chrX | 51050001 | 51150000 | 358 | 464 | 51100000 | -0.1782  | 0.01284  | 0 |
| chrX | 51400001 | 51500000 | 231 | 294 | 51450000 | -0.15196 | 0.028373 | 0 |
| chrX | 51600001 | 51700000 | 382 | 493 | 51650000 | -0.17205 | 0.01559  | 0 |
| chrX | 51700001 | 51800000 | 262 | 332 | 51750000 | -0.14565 | 0.033865 | 0 |
| chrX | 51800001 | 51900000 | 243 | 312 | 51850000 | -0.16463 | 0.019573 | 0 |
| chrX | 51900001 | 52000000 | 188 | 240 | 51950000 | -0.15634 | 0.025015 | 0 |
| chrX | 52550001 | 52650000 | 304 | 388 | 52600000 | -0.15602 | 0.025246 | 0 |
| chrX | 52800001 | 52900000 | 247 | 311 | 52850000 | -0.13644 | 0.043443 | 0 |
| chrX | 52850001 | 52950000 | 200 | 253 | 52900000 | -0.14317 | 0.036252 | 0 |
| chrX | 53200001 | 53300000 | 691 | 723 | 53250000 | 0.130653 | 0.049473 | 0 |
| chrX | 53900001 | 54000000 | 435 | 452 | 53950000 | 0.140656 | 0.037847 | 0 |
| chrX | 54350001 | 54450000 | 406 | 526 | 54400000 | -0.17762 | 0.013081 | 0 |
| chrX | 54450001 | 54550000 | 585 | 608 | 54500000 | 0.140328 | 0.038188 | 0 |
| chrX | 54700001 | 54800000 | 360 | 456 | 54750000 | -0.14507 | 0.034411 | 0 |
| chrX | 55000001 | 55100000 | 521 | 540 | 55050000 | 0.144287 | 0.034223 | 0 |
| chrX | 55150001 | 55250000 | 439 | 568 | 55200000 | -0.17571 | 0.0139   | 0 |
| chrX | 55300001 | 55400000 | 385 | 402 | 55350000 | 0.133626 | 0.045752 | 0 |
| chrX | 55900001 | 56000000 | 361 | 455 | 55950000 | -0.1379  | 0.041788 | 0 |
| chrX | 56150001 | 56250000 | 297 | 380 | 56200000 | -0.15957 | 0.022756 | 0 |
| chrX | 57200001 | 57300000 | 383 | 487 | 57250000 | -0.15061 | 0.029478 | 0 |
| chrX | 57250001 | 57350000 | 370 | 482 | 57300000 | -0.18554 | 0.010118 | 0 |
| chrX | 58150001 | 58250000 | 415 | 530 | 58200000 | -0.15692 | 0.024597 | 0 |
| chrX | 61700001 | 61800000 | 408 | 425 | 61750000 | 0.137069 | 0.041728 | 0 |
| chrX | 61800001 | 61900000 | 417 | 537 | 61850000 | -0.16891 | 0.01718  | 0 |
| chrX | 62000001 | 62100000 | 384 | 482 | 62050000 | -0.13196 | 0.048835 | 0 |
| chrX | 62050001 | 62150000 | 329 | 422 | 62100000 | -0.16319 | 0.020435 | 0 |
| chrX | 62200001 | 62300000 | 348 | 437 | 62250000 | -0.13258 | 0.048059 | 0 |
| chrX | 62250001 | 62350000 | 323 | 407 | 62300000 | -0.13753 | 0.042205 | 0 |



|      |          |          |     |     |          |          |          |   |
|------|----------|----------|-----|-----|----------|----------|----------|---|
| chrX | 62300001 | 62400000 | 143 | 183 | 62350000 | -0.15987 | 0.022561 | 0 |
| chrX | 62450001 | 62550000 | 246 | 312 | 62500000 | -0.14692 | 0.032692 | 0 |
| chrX | 62550001 | 62650000 | 367 | 471 | 62600000 | -0.16398 | 0.019955 | 0 |
| chrX | 62850001 | 62950000 | 421 | 535 | 62900000 | -0.14976 | 0.030201 | 0 |
| chrX | 62950001 | 63050000 | 429 | 551 | 6.30E+07 | -0.16511 | 0.019289 | 0 |
| chrX | 63450001 | 63550000 | 349 | 441 | 63500000 | -0.14159 | 0.037851 | 0 |
| chrX | 63700001 | 63800000 | 275 | 351 | 63750000 | -0.15608 | 0.025207 | 0 |
| chrX | 63800001 | 63900000 | 328 | 414 | 63850000 | -0.13997 | 0.03954  | 0 |
| chrX | 64150001 | 64250000 | 373 | 479 | 64200000 | -0.16489 | 0.01942  | 0 |
| chrX | 64250001 | 64350000 | 334 | 420 | 64300000 | -0.13458 | 0.045624 | 0 |
| chrX | 64350001 | 64450000 | 271 | 342 | 64400000 | -0.13974 | 0.039786 | 0 |
| chrX | 64500001 | 64600000 | 334 | 427 | 64550000 | -0.15842 | 0.023537 | 0 |
| chrX | 64950001 | 65050000 | 449 | 566 | 6.50E+07 | -0.13812 | 0.041545 | 0 |
| chrX | 65050001 | 65150000 | 425 | 539 | 65100000 | -0.14686 | 0.032752 | 0 |
| chrX | 65400001 | 65500000 | 365 | 459 | 65450000 | -0.13463 | 0.045557 | 0 |
| chrX | 65450001 | 65550000 | 391 | 496 | 65500000 | -0.14721 | 0.032435 | 0 |
| chrX | 65500001 | 65600000 | 332 | 430 | 65550000 | -0.17719 | 0.013261 | 0 |
| chrX | 65650001 | 65750000 | 356 | 462 | 65700000 | -0.18005 | 0.0121   | 0 |
| chrX | 65700001 | 65800000 | 321 | 404 | 65750000 | -0.13582 | 0.044162 | 0 |
| chrX | 65750001 | 65850000 | 334 | 431 | 65800000 | -0.17188 | 0.015675 | 0 |
| chrX | 66900001 | 67000000 | 453 | 579 | 66950000 | -0.15809 | 0.02377  | 0 |
| chrX | 67200001 | 67300000 | 430 | 555 | 67250000 | -0.17219 | 0.015524 | 0 |
| chrX | 67300001 | 67400000 | 463 | 583 | 67350000 | -0.13652 | 0.043351 | 0 |
| chrX | 67600001 | 67700000 | 523 | 542 | 67650000 | 0.144481 | 0.034037 | 0 |
| chrX | 68350001 | 68450000 | 605 | 767 | 68400000 | -0.14633 | 0.033238 | 0 |
| chrX | 68400001 | 68500000 | 556 | 698 | 68450000 | -0.13218 | 0.048564 | 0 |
| chrX | 68550001 | 68650000 | 436 | 560 | 68600000 | -0.16514 | 0.019275 | 0 |
| chrX | 68900001 | 69000000 | 384 | 493 | 68950000 | -0.16452 | 0.019637 | 0 |
| chrX | 69000001 | 69100000 | 347 | 359 | 69050000 | 0.146915 | 0.031782 | 0 |
| chrX | 69250001 | 69350000 | 492 | 634 | 69300000 | -0.16986 | 0.016685 | 0 |
| chrX | 69350001 | 69450000 | 565 | 590 | 69400000 | 0.133499 | 0.045907 | 0 |
| chrX | 70250001 | 70350000 | 608 | 620 | 70300000 | 0.167766 | 0.01708  | 0 |
| chrX | 70300001 | 70400000 | 682 | 708 | 70350000 | 0.141985 | 0.036485 | 0 |
| chrX | 70550001 | 70650000 | 474 | 481 | 70600000 | 0.174813 | 0.013658 | 0 |
| chrX | 70800001 | 70900000 | 545 | 570 | 70850000 | 0.131257 | 0.048698 | 0 |
| chrX | 70850001 | 70950000 | 279 | 285 | 70900000 | 0.165266 | 0.018459 | 0 |
| chrX | 71050001 | 71150000 | 383 | 496 | 71100000 | -0.17703 | 0.013328 | 0 |
| chrX | 71100001 | 71200000 | 513 | 645 | 71150000 | -0.13438 | 0.045865 | 0 |
| chrX | 72200001 | 72300000 | 293 | 373 | 72250000 | -0.15231 | 0.02809  | 0 |
| chrX | 73300001 | 73400000 | 467 | 476 | 73350000 | 0.168424 | 0.016732 | 0 |
| chrX | 73800001 | 73900000 | 491 | 502 | 73850000 | 0.163999 | 0.019194 | 0 |
| chrX | 73950001 | 74050000 | 400 | 507 | 7.40E+07 | -0.14602 | 0.033521 | 0 |
| chrX | 74050001 | 74150000 | 381 | 491 | 74100000 | -0.16997 | 0.016629 | 0 |
| chrX | 74450001 | 74550000 | 257 | 324 | 74500000 | -0.13826 | 0.041392 | 0 |
| chrX | 74650001 | 74750000 | 292 | 367 | 74700000 | -0.13385 | 0.046503 | 0 |
| chrX | 75400001 | 75500000 | 306 | 390 | 75450000 | -0.15398 | 0.02678  | 0 |
| chrX | 75450001 | 75550000 | 250 | 325 | 75500000 | -0.18255 | 0.011161 | 0 |

|      |          |          |     |     |          |          |          |   |
|------|----------|----------|-----|-----|----------|----------|----------|---|
| chrX | 75500001 | 75600000 | 283 | 368 | 75550000 | -0.18294 | 0.01102  | 0 |
| chrX | 75600001 | 75700000 | 362 | 463 | 75650000 | -0.15906 | 0.023103 | 0 |
| chrX | 75650001 | 75750000 | 347 | 452 | 75700000 | -0.18542 | 0.010159 | 0 |
| chrX | 76000001 | 76100000 | 354 | 450 | 76050000 | -0.15021 | 0.029814 | 0 |
| chrX | 76300001 | 76400000 | 350 | 443 | 76350000 | -0.14399 | 0.035453 | 0 |
| chrX | 76350001 | 76450000 | 318 | 408 | 76400000 | -0.16358 | 0.0202   | 0 |
| chrX | 76500001 | 76600000 | 340 | 433 | 76550000 | -0.15287 | 0.027646 | 0 |
| chrX | 77050001 | 77150000 | 422 | 438 | 77100000 | 0.142275 | 0.036194 | 0 |
| chrX | 77150001 | 77250000 | 574 | 585 | 77200000 | 0.168577 | 0.016652 | 0 |
| chrX | 78150001 | 78250000 | 370 | 482 | 78200000 | -0.18554 | 0.010118 | 0 |
| chrX | 78200001 | 78300000 | 331 | 429 | 78250000 | -0.17818 | 0.012848 | 0 |
| chrX | 78400001 | 78500000 | 370 | 471 | 78450000 | -0.15224 | 0.028149 | 0 |
| chrX | 78950001 | 79050000 | 352 | 453 | 7.90E+07 | -0.16797 | 0.017682 | 0 |
| chrX | 79300001 | 79400000 | 373 | 378 | 79350000 | 0.176752 | 0.012827 | 0 |
| chrX | 79800001 | 79900000 | 343 | 434 | 79850000 | -0.14352 | 0.035908 | 0 |
| chrX | 80150001 | 80250000 | 320 | 410 | 80200000 | -0.16159 | 0.021437 | 0 |
| chrX | 80800001 | 80900000 | 406 | 510 | 80850000 | -0.13305 | 0.047474 | 0 |
| chrX | 81450001 | 81550000 | 390 | 495 | 81500000 | -0.14799 | 0.031734 | 0 |
| chrX | 82000001 | 82100000 | 338 | 424 | 82050000 | -0.13108 | 0.049964 | 0 |
| chrX | 82250001 | 82350000 | 337 | 430 | 82300000 | -0.15563 | 0.025539 | 0 |
| chrX | 82400001 | 82500000 | 351 | 449 | 82450000 | -0.15928 | 0.022953 | 0 |
| chrX | 82550001 | 82650000 | 344 | 436 | 82600000 | -0.14596 | 0.033582 | 0 |
| chrX | 82700001 | 82800000 | 420 | 537 | 82750000 | -0.15857 | 0.023438 | 0 |
| chrX | 82850001 | 82950000 | 341 | 429 | 82900000 | -0.13524 | 0.044836 | 0 |
| chrX | 83650001 | 83750000 | 397 | 501 | 83700000 | -0.13971 | 0.03982  | 0 |
| chrX | 83850001 | 83950000 | 192 | 242 | 83900000 | -0.13794 | 0.041752 | 0 |
| chrX | 84400001 | 84500000 | 397 | 509 | 84450000 | -0.16256 | 0.020823 | 0 |
| chrX | 84500001 | 84600000 | 368 | 473 | 84550000 | -0.16617 | 0.018679 | 0 |
| chrX | 84750001 | 84850000 | 336 | 432 | 84800000 | -0.16661 | 0.018434 | 0 |
| chrX | 85050001 | 85150000 | 409 | 514 | 85100000 | -0.1337  | 0.046678 | 0 |
| chrX | 85100001 | 85200000 | 420 | 528 | 85150000 | -0.13419 | 0.046095 | 0 |
| chrX | 85150001 | 85250000 | 438 | 563 | 85200000 | -0.16624 | 0.01864  | 0 |
| chrX | 85700001 | 85800000 | 379 | 476 | 85750000 | -0.1328  | 0.047788 | 0 |
| chrX | 85800001 | 85900000 | 392 | 506 | 85850000 | -0.17232 | 0.01546  | 0 |
| chrX | 86050001 | 86150000 | 364 | 462 | 86100000 | -0.14799 | 0.031734 | 0 |
| chrX | 86550001 | 86650000 | 404 | 515 | 86600000 | -0.15425 | 0.02657  | 0 |
| chrX | 86800001 | 86900000 | 402 | 517 | 86850000 | -0.16701 | 0.018211 | 0 |
| chrX | 86850001 | 86950000 | 383 | 496 | 86900000 | -0.17703 | 0.013328 | 0 |
| chrX | 87050001 | 87150000 | 381 | 482 | 87100000 | -0.14328 | 0.036149 | 0 |
| chrX | 87150001 | 87250000 | 402 | 511 | 87200000 | -0.15016 | 0.029855 | 0 |
| chrX | 88100001 | 88200000 | 465 | 589 | 88150000 | -0.14507 | 0.034411 | 0 |
| chrX | 88250001 | 88350000 | 467 | 592 | 88300000 | -0.14621 | 0.033346 | 0 |
| chrX | 88600001 | 88700000 | 36  | 46  | 88650000 | -0.15767 | 0.024061 | 0 |
| chrX | 88850001 | 88950000 | 31  | 32  | 88900000 | 0.150159 | 0.02897  | 0 |
| chrX | 89050001 | 89150000 | 27  | 35  | 89100000 | -0.17843 | 0.012746 | 0 |
| chrX | 89250001 | 89350000 | 340 | 432 | 89300000 | -0.14953 | 0.030391 | 0 |
| chrX | 89550001 | 89650000 | 26  | 33  | 89600000 | -0.14799 | 0.031734 | 0 |

|      |          |          |     |     |          |          |          |   |
|------|----------|----------|-----|-----|----------|----------|----------|---|
| chrX | 89900001 | 90000000 | 42  | 53  | 89950000 | -0.13964 | 0.039894 | 0 |
| chrX | 90050001 | 90150000 | 50  | 64  | 90100000 | -0.16018 | 0.022351 | 0 |
| chrX | 90150001 | 90250000 | 20  | 26  | 90200000 | -0.18255 | 0.011161 | 0 |
| chrX | 90200001 | 90300000 | 55  | 69  | 90250000 | -0.1312  | 0.049805 | 0 |
| chrX | 90400001 | 90500000 | 26  | 27  | 90450000 | 0.141515 | 0.036962 | 0 |
| chrX | 90500001 | 90600000 | 293 | 370 | 90550000 | -0.14066 | 0.038812 | 0 |
| chrX | 90600001 | 90700000 | 363 | 472 | 90650000 | -0.18285 | 0.011051 | 0 |
| chrX | 91050001 | 91150000 | 20  | 26  | 91100000 | -0.18255 | 0.011161 | 0 |
| chrX | 91550001 | 91650000 | 36  | 37  | 91600000 | 0.156435 | 0.024117 | 0 |
| chrX | 91800001 | 91900000 | 34  | 35  | 91850000 | 0.154143 | 0.025803 | 0 |
| chrX | 91850001 | 91950000 | 33  | 34  | 91900000 | 0.152894 | 0.026763 | 0 |
| chrX | 92000001 | 92100000 | 31  | 32  | 92050000 | 0.150159 | 0.02897  | 0 |
| chrX | 92350001 | 92450000 | 276 | 355 | 92400000 | -0.16719 | 0.018111 | 0 |
| chrX | 92500001 | 92600000 | 355 | 449 | 92550000 | -0.14293 | 0.036492 | 0 |
| chrX | 92650001 | 92750000 | 368 | 472 | 92700000 | -0.16312 | 0.020481 | 0 |
| chrX | 92950001 | 93050000 | 395 | 497 | 9.30E+07 | -0.13543 | 0.044616 | 0 |
| chrX | 93400001 | 93500000 | 400 | 508 | 93450000 | -0.14887 | 0.030967 | 0 |
| chrX | 93600001 | 93700000 | 375 | 474 | 93650000 | -0.14203 | 0.037397 | 0 |
| chrX | 94000001 | 94100000 | 314 | 404 | 94050000 | -0.16763 | 0.017869 | 0 |
| chrX | 94250001 | 94350000 | 370 | 482 | 94300000 | -0.18554 | 0.010118 | 0 |
| chrX | 94350001 | 94450000 | 372 | 479 | 94400000 | -0.16876 | 0.01726  | 0 |
| chrX | 94450001 | 94550000 | 350 | 446 | 94500000 | -0.15373 | 0.026976 | 0 |
| chrX | 94750001 | 94850000 | 372 | 468 | 94800000 | -0.13524 | 0.044836 | 0 |
| chrX | 94850001 | 94950000 | 358 | 460 | 94900000 | -0.16571 | 0.018942 | 0 |
| chrX | 95450001 | 95550000 | 321 | 410 | 95500000 | -0.15709 | 0.024476 | 0 |
| chrX | 96050001 | 96150000 | 431 | 545 | 96100000 | -0.14261 | 0.036819 | 0 |
| chrX | 96350001 | 96450000 | 270 | 282 | 96400000 | 0.133227 | 0.046238 | 0 |
| chrX | 97100001 | 97200000 | 416 | 534 | 97150000 | -0.16429 | 0.019771 | 0 |
| chrX | 97150001 | 97250000 | 378 | 478 | 97200000 | -0.14266 | 0.036763 | 0 |
| chrX | 97950001 | 98050000 | 385 | 495 | 9.80E+07 | -0.16661 | 0.018434 | 0 |
| chrX | 98650001 | 98750000 | 392 | 503 | 98700000 | -0.16374 | 0.020101 | 0 |
| chrX | 98750001 | 98850000 | 374 | 472 | 98800000 | -0.13979 | 0.039738 | 0 |
| chrX | 99250001 | 99350000 | 403 | 516 | 99300000 | -0.16063 | 0.022058 | 0 |
| chrX | 99300001 | 99400000 | 351 | 455 | 99350000 | -0.17843 | 0.012746 | 0 |
| chrX | 99600001 | 99700000 | 517 | 651 | 99650000 | -0.13653 | 0.04334  | 0 |
| chrX | 1E+08    | 1E+08    | 524 | 539 | 1E+08    | 0.155245 | 0.02498  | 0 |
| chrX | 1E+08    | 1.01E+08 | 491 | 627 | 1.01E+08 | -0.15678 | 0.024697 | 0 |
| chrX | 1.01E+08 | 1.01E+08 | 371 | 469 | 1.01E+08 | -0.14221 | 0.037222 | 0 |
| chrX | 1.01E+08 | 1.02E+08 | 7   | 9   | 1.02E+08 | -0.16661 | 0.018434 | 0 |
| chrX | 1.02E+08 | 1.02E+08 | 484 | 618 | 1.02E+08 | -0.15664 | 0.0248   | 0 |
| chrX | 1.02E+08 | 1.03E+08 | 498 | 630 | 1.03E+08 | -0.14324 | 0.036184 | 0 |
| chrX | 1.04E+08 | 1.04E+08 | 477 | 610 | 1.04E+08 | -0.15886 | 0.023241 | 0 |
| chrX | 1.04E+08 | 1.04E+08 | 377 | 474 | 1.04E+08 | -0.13436 | 0.045886 | 0 |
| chrX | 1.05E+08 | 1.05E+08 | 393 | 496 | 1.05E+08 | -0.13985 | 0.039672 | 0 |
| chrX | 1.05E+08 | 1.05E+08 | 448 | 577 | 1.05E+08 | -0.16911 | 0.017076 | 0 |
| chrX | 1.05E+08 | 1.05E+08 | 382 | 494 | 1.05E+08 | -0.17498 | 0.014225 | 0 |
| chrX | 1.05E+08 | 1.05E+08 | 385 | 492 | 1.05E+08 | -0.15784 | 0.023946 | 0 |

|      |          |          |     |     |          |          |          |   |
|------|----------|----------|-----|-----|----------|----------|----------|---|
| chrX | 1.05E+08 | 1.05E+08 | 409 | 530 | 1.05E+08 | -0.17793 | 0.012953 | 0 |
| chrX | 1.05E+08 | 1.05E+08 | 390 | 493 | 1.05E+08 | -0.14215 | 0.037278 | 0 |
| chrX | 1.06E+08 | 1.06E+08 | 430 | 544 | 1.06E+08 | -0.14331 | 0.036121 | 0 |
| chrX | 1.06E+08 | 1.06E+08 | 429 | 549 | 1.06E+08 | -0.15987 | 0.022561 | 0 |
| chrX | 1.06E+08 | 1.06E+08 | 428 | 548 | 1.06E+08 | -0.1606  | 0.022075 | 0 |
| chrX | 1.06E+08 | 1.06E+08 | 473 | 596 | 1.06E+08 | -0.13751 | 0.04223  | 0 |
| chrX | 1.06E+08 | 1.06E+08 | 451 | 571 | 1.06E+08 | -0.1444  | 0.035055 | 0 |
| chrX | 1.06E+08 | 1.06E+08 | 577 | 596 | 1.06E+08 | 0.149222 | 0.02976  | 0 |
| chrX | 1.07E+08 | 1.07E+08 | 482 | 607 | 1.07E+08 | -0.1367  | 0.043146 | 0 |
| chrX | 1.07E+08 | 1.07E+08 | 537 | 680 | 1.07E+08 | -0.14465 | 0.034816 | 0 |
| chrX | 1.07E+08 | 1.08E+08 | 542 | 685 | 1.07E+08 | -0.14185 | 0.037585 | 0 |
| chrX | 1.08E+08 | 1.08E+08 | 484 | 626 | 1.08E+08 | -0.17519 | 0.014128 | 0 |
| chrX | 1.08E+08 | 1.08E+08 | 466 | 587 | 1.08E+08 | -0.13707 | 0.042728 | 0 |
| chrX | 1.08E+08 | 1.08E+08 | 362 | 467 | 1.08E+08 | -0.17147 | 0.015874 | 0 |
| chrX | 1.08E+08 | 1.08E+08 | 405 | 509 | 1.08E+08 | -0.13378 | 0.046585 | 0 |
| chrX | 1.08E+08 | 1.09E+08 | 345 | 440 | 1.08E+08 | -0.15494 | 0.026046 | 0 |
| chrX | 1.09E+08 | 1.09E+08 | 427 | 539 | 1.09E+08 | -0.14009 | 0.039418 | 0 |
| chrX | 1.09E+08 | 1.09E+08 | 473 | 614 | 1.09E+08 | -0.18044 | 0.011952 | 0 |
| chrX | 1.09E+08 | 1.09E+08 | 509 | 639 | 1.09E+08 | -0.13219 | 0.048554 | 0 |
| chrX | 1.09E+08 | 1.09E+08 | 516 | 651 | 1.09E+08 | -0.13932 | 0.040234 | 0 |
| chrX | 1.09E+08 | 1.09E+08 | 524 | 531 | 1.09E+08 | 0.176818 | 0.012799 | 0 |
| chrX | 1.09E+08 | 1.09E+08 | 543 | 565 | 1.09E+08 | 0.138664 | 0.039964 | 0 |
| chrX | 1.09E+08 | 1.09E+08 | 632 | 644 | 1.09E+08 | 0.168827 | 0.016522 | 0 |
| chrX | 1.1E+08  | 1.1E+08  | 548 | 696 | 1.1E+08  | -0.14895 | 0.030895 | 0 |
| chrX | 1.1E+08  | 1.1E+08  | 516 | 653 | 1.1E+08  | -0.14375 | 0.035687 | 0 |
| chrX | 1.1E+08  | 1.11E+08 | 464 | 586 | 1.1E+08  | -0.14081 | 0.038654 | 0 |
| chrX | 1.11E+08 | 1.11E+08 | 285 | 362 | 1.11E+08 | -0.14906 | 0.030794 | 0 |
| chrX | 1.11E+08 | 1.11E+08 | 220 | 280 | 1.11E+08 | -0.15196 | 0.028373 | 0 |
| chrX | 1.11E+08 | 1.11E+08 | 249 | 252 | 1.11E+08 | 0.178685 | 0.012043 | 0 |
| chrX | 1.11E+08 | 1.11E+08 | 226 | 234 | 1.11E+08 | 0.145777 | 0.03282  | 0 |
| chrX | 1.12E+08 | 1.12E+08 | 194 | 244 | 1.12E+08 | -0.13486 | 0.045287 | 0 |
| chrX | 1.13E+08 | 1.13E+08 | 231 | 291 | 1.13E+08 | -0.13716 | 0.04262  | 0 |
| chrX | 1.13E+08 | 1.14E+08 | 240 | 304 | 1.13E+08 | -0.14507 | 0.034411 | 0 |
| chrX | 1.14E+08 | 1.14E+08 | 199 | 252 | 1.14E+08 | -0.14469 | 0.034775 | 0 |
| chrX | 1.14E+08 | 1.14E+08 | 260 | 263 | 1.14E+08 | 0.179412 | 0.011759 | 0 |
| chrX | 1.14E+08 | 1.14E+08 | 245 | 252 | 1.14E+08 | 0.155321 | 0.024924 | 0 |
| chrX | 1.14E+08 | 1.14E+08 | 218 | 278 | 1.14E+08 | -0.15479 | 0.02616  | 0 |
| chrX | 1.14E+08 | 1.14E+08 | 273 | 278 | 1.14E+08 | 0.169779 | 0.016035 | 0 |
| chrX | 1.14E+08 | 1.14E+08 | 237 | 303 | 1.14E+08 | -0.15847 | 0.023508 | 0 |
| chrX | 1.15E+08 | 1.15E+08 | 266 | 343 | 1.15E+08 | -0.17082 | 0.016198 | 0 |
| chrX | 1.15E+08 | 1.15E+08 | 288 | 301 | 1.15E+08 | 0.132268 | 0.047423 | 0 |
| chrX | 1.16E+08 | 1.16E+08 | 215 | 225 | 1.16E+08 | 0.130375 | 0.049834 | 0 |
| chrX | 1.16E+08 | 1.16E+08 | 184 | 237 | 1.16E+08 | -0.16922 | 0.017019 | 0 |
| chrX | 1.16E+08 | 1.16E+08 | 178 | 225 | 1.16E+08 | -0.14208 | 0.037345 | 0 |
| chrX | 1.17E+08 | 1.17E+08 | 212 | 215 | 1.17E+08 | 0.175691 | 0.013276 | 0 |
| chrX | 1.17E+08 | 1.17E+08 | 220 | 283 | 1.17E+08 | -0.16734 | 0.018029 | 0 |
| chrX | 1.17E+08 | 1.17E+08 | 216 | 276 | 1.17E+08 | -0.15767 | 0.024061 | 0 |

|      |          |          |     |     |          |          |          |   |
|------|----------|----------|-----|-----|----------|----------|----------|---|
| chrX | 1.18E+08 | 1.18E+08 | 267 | 279 | 1.18E+08 | 0.132538 | 0.047088 | 0 |
| chrX | 1.18E+08 | 1.18E+08 | 249 | 319 | 1.18E+08 | -0.16145 | 0.021528 | 0 |
| chrX | 1.18E+08 | 1.19E+08 | 273 | 281 | 1.19E+08 | 0.154294 | 0.025689 | 0 |
| chrX | 1.19E+08 | 1.19E+08 | 272 | 283 | 1.19E+08 | 0.138768 | 0.039852 | 0 |
| chrX | 1.19E+08 | 1.19E+08 | 152 | 191 | 1.19E+08 | -0.13354 | 0.046881 | 0 |
| chrX | 1.19E+08 | 1.2E+08  | 276 | 280 | 1.2E+08  | 0.175204 | 0.013486 | 0 |
| chrX | 1.2E+08  | 1.2E+08  | 270 | 343 | 1.2E+08  | -0.14929 | 0.030603 | 0 |
| chrX | 1.2E+08  | 1.2E+08  | 232 | 297 | 1.2E+08  | -0.16038 | 0.022223 | 0 |
| chrX | 1.2E+08  | 1.2E+08  | 220 | 279 | 1.2E+08  | -0.1468  | 0.032807 | 0 |
| chrX | 1.21E+08 | 1.21E+08 | 196 | 252 | 1.21E+08 | -0.16661 | 0.018434 | 0 |
| chrX | 1.21E+08 | 1.21E+08 | 198 | 250 | 1.21E+08 | -0.14046 | 0.039018 | 0 |
| chrX | 1.21E+08 | 1.21E+08 | 215 | 275 | 1.21E+08 | -0.15913 | 0.023054 | 0 |
| chrX | 1.21E+08 | 1.21E+08 | 186 | 240 | 1.21E+08 | -0.17177 | 0.015728 | 0 |
| chrX | 1.21E+08 | 1.21E+08 | 207 | 265 | 1.21E+08 | -0.1604  | 0.022208 | 0 |
| chrX | 1.21E+08 | 1.22E+08 | 172 | 221 | 1.21E+08 | -0.16567 | 0.018963 | 0 |
| chrX | 1.22E+08 | 1.22E+08 | 199 | 250 | 1.22E+08 | -0.1332  | 0.047299 | 0 |
| chrX | 1.22E+08 | 1.22E+08 | 260 | 328 | 1.22E+08 | -0.13922 | 0.040344 | 0 |
| chrX | 1.23E+08 | 1.23E+08 | 233 | 296 | 1.23E+08 | -0.1493  | 0.030588 | 0 |
| chrX | 1.23E+08 | 1.23E+08 | 247 | 321 | 1.23E+08 | -0.1821  | 0.011325 | 0 |
| chrX | 1.23E+08 | 1.23E+08 | 234 | 304 | 1.23E+08 | -0.1816  | 0.01151  | 0 |
| chrX | 1.23E+08 | 1.23E+08 | 226 | 289 | 1.23E+08 | -0.15878 | 0.023291 | 0 |
| chrX | 1.23E+08 | 1.23E+08 | 236 | 304 | 1.23E+08 | -0.16932 | 0.016965 | 0 |
| chrX | 1.24E+08 | 1.24E+08 | 237 | 301 | 1.24E+08 | -0.14891 | 0.030925 | 0 |
| chrX | 1.26E+08 | 1.26E+08 | 175 | 228 | 1.26E+08 | -0.18572 | 0.010062 | 0 |
| chrX | 1.26E+08 | 1.26E+08 | 226 | 231 | 1.26E+08 | 0.164393 | 0.018963 | 0 |
| chrX | 1.26E+08 | 1.26E+08 | 216 | 219 | 1.26E+08 | 0.176063 | 0.013117 | 0 |
| chrX | 1.26E+08 | 1.26E+08 | 223 | 231 | 1.26E+08 | 0.145114 | 0.033439 | 0 |
| chrX | 1.27E+08 | 1.27E+08 | 185 | 237 | 1.27E+08 | -0.1614  | 0.021559 | 0 |
| chrX | 1.27E+08 | 1.27E+08 | 164 | 210 | 1.27E+08 | -0.16073 | 0.021991 | 0 |
| chrX | 1.27E+08 | 1.27E+08 | 204 | 212 | 1.27E+08 | 0.140468 | 0.038042 | 0 |
| chrX | 1.27E+08 | 1.27E+08 | 199 | 256 | 1.27E+08 | -0.16741 | 0.017987 | 0 |
| chrX | 1.27E+08 | 1.27E+08 | 194 | 251 | 1.27E+08 | -0.17567 | 0.013918 | 0 |
| chrX | 1.27E+08 | 1.27E+08 | 226 | 235 | 1.27E+08 | 0.139625 | 0.038931 | 0 |
| chrX | 1.28E+08 | 1.28E+08 | 203 | 262 | 1.28E+08 | -0.17212 | 0.015555 | 0 |
| chrX | 1.28E+08 | 1.28E+08 | 203 | 255 | 1.28E+08 | -0.13305 | 0.047474 | 0 |
| chrX | 1.29E+08 | 1.29E+08 | 398 | 408 | 1.29E+08 | 0.160162 | 0.021572 | 0 |
| chrX | 1.29E+08 | 1.29E+08 | 326 | 331 | 1.29E+08 | 0.174004 | 0.014018 | 0 |
| chrX | 1.29E+08 | 1.29E+08 | 313 | 316 | 1.29E+08 | 0.182201 | 0.010723 | 0 |
| chrX | 1.3E+08  | 1.3E+08  | 276 | 352 | 1.3E+08  | -0.15494 | 0.026046 | 0 |
| chrX | 1.3E+08  | 1.3E+08  | 293 | 305 | 1.3E+08  | 0.138054 | 0.040631 | 0 |
| chrX | 1.3E+08  | 1.3E+08  | 314 | 319 | 1.3E+08  | 0.173171 | 0.014397 | 0 |
| chrX | 1.3E+08  | 1.3E+08  | 217 | 223 | 1.3E+08  | 0.156614 | 0.023988 | 0 |
| chrX | 1.3E+08  | 1.31E+08 | 255 | 263 | 1.31E+08 | 0.151397 | 0.027953 | 0 |
| chrX | 1.31E+08 | 1.32E+08 | 235 | 296 | 1.31E+08 | -0.13697 | 0.042835 | 0 |
| chrX | 1.32E+08 | 1.32E+08 | 280 | 362 | 1.32E+08 | -0.1746  | 0.014394 | 0 |
| chrX | 1.32E+08 | 1.32E+08 | 297 | 306 | 1.32E+08 | 0.152894 | 0.026763 | 0 |
| chrX | 1.32E+08 | 1.33E+08 | 224 | 282 | 1.32E+08 | -0.13623 | 0.043681 | 0 |

|      |          |          |     |     |          |          |          |   |
|------|----------|----------|-----|-----|----------|----------|----------|---|
| chrX | 1.33E+08 | 1.33E+08 | 231 | 297 | 1.33E+08 | -0.16661 | 0.018434 | 0 |
| chrX | 1.33E+08 | 1.33E+08 | 216 | 224 | 1.33E+08 | 0.143496 | 0.034987 | 0 |
| chrX | 1.34E+08 | 1.34E+08 | 263 | 330 | 1.34E+08 | -0.13144 | 0.0495   | 0 |
| chrX | 1.34E+08 | 1.34E+08 | 122 | 155 | 1.34E+08 | -0.14942 | 0.030485 | 0 |
| chrX | 1.34E+08 | 1.35E+08 | 298 | 308 | 1.35E+08 | 0.148345 | 0.030516 | 0 |
| chrX | 1.35E+08 | 1.35E+08 | 249 | 317 | 1.35E+08 | -0.15237 | 0.02804  | 0 |
| chrX | 1.36E+08 | 1.36E+08 | 271 | 344 | 1.36E+08 | -0.14815 | 0.031592 | 0 |
| chrX | 1.36E+08 | 1.36E+08 | 242 | 309 | 1.36E+08 | -0.15664 | 0.0248   | 0 |
| chrX | 1.36E+08 | 1.37E+08 | 306 | 395 | 1.37E+08 | -0.17236 | 0.015442 | 0 |
| chrX | 1.37E+08 | 1.38E+08 | 186 | 238 | 1.38E+08 | -0.1597  | 0.022674 | 0 |
| chrX | 1.38E+08 | 1.38E+08 | 214 | 271 | 1.38E+08 | -0.14472 | 0.034749 | 0 |
| chrX | 1.38E+08 | 1.38E+08 | 228 | 287 | 1.38E+08 | -0.13605 | 0.043889 | 0 |
| chrX | 1.38E+08 | 1.38E+08 | 203 | 260 | 1.38E+08 | -0.16107 | 0.021771 | 0 |
| chrX | 1.38E+08 | 1.38E+08 | 205 | 261 | 1.38E+08 | -0.15246 | 0.027969 | 0 |
| chrX | 1.38E+08 | 1.38E+08 | 211 | 215 | 1.38E+08 | 0.168869 | 0.0165   | 0 |
| chrX | 1.39E+08 | 1.39E+08 | 197 | 248 | 1.39E+08 | -0.13618 | 0.043741 | 0 |
| chrX | 1.39E+08 | 1.39E+08 | 205 | 258 | 1.39E+08 | -0.13578 | 0.044202 | 0 |
| chrX | 1.39E+08 | 1.39E+08 | 134 | 171 | 1.39E+08 | -0.1558  | 0.025409 | 0 |
| chrX | 1.39E+08 | 1.39E+08 | 166 | 170 | 1.39E+08 | 0.161612 | 0.020646 | 0 |
| chrX | 1.39E+08 | 1.39E+08 | 200 | 256 | 1.39E+08 | -0.16018 | 0.022351 | 0 |
| chrX | 1.4E+08  | 1.4E+08  | 198 | 250 | 1.4E+08  | -0.14046 | 0.039018 | 0 |
| chrX | 1.4E+08  | 1.4E+08  | 233 | 295 | 1.4E+08  | -0.14442 | 0.035034 | 0 |
| chrX | 1.4E+08  | 1.4E+08  | 222 | 285 | 1.4E+08  | -0.16444 | 0.019684 | 0 |
| chrX | 1.4E+08  | 1.4E+08  | 60  | 76  | 1.4E+08  | -0.14507 | 0.034411 | 0 |
| chrX | 1.4E+08  | 1.4E+08  | 140 | 177 | 1.4E+08  | -0.14236 | 0.037067 | 0 |
| chrX | 1.4E+08  | 1.41E+08 | 181 | 230 | 1.41E+08 | -0.14968 | 0.030265 | 0 |
| chrX | 1.41E+08 | 1.41E+08 | 160 | 208 | 1.41E+08 | -0.18255 | 0.011161 | 0 |
| chrX | 1.42E+08 | 1.42E+08 | 180 | 227 | 1.42E+08 | -0.13873 | 0.040876 | 0 |
| chrX | 1.42E+08 | 1.42E+08 | 182 | 231 | 1.42E+08 | -0.14799 | 0.031734 | 0 |
| chrX | 1.42E+08 | 1.42E+08 | 192 | 249 | 1.42E+08 | -0.17908 | 0.012486 | 0 |
| chrX | 1.42E+08 | 1.42E+08 | 185 | 240 | 1.42E+08 | -0.17955 | 0.012299 | 0 |
| chrX | 1.42E+08 | 1.42E+08 | 222 | 226 | 1.42E+08 | 0.1702   | 0.015823 | 0 |
| chrX | 1.43E+08 | 1.43E+08 | 183 | 234 | 1.43E+08 | -0.1587  | 0.023347 | 0 |
| chrX | 1.43E+08 | 1.43E+08 | 207 | 214 | 1.43E+08 | 0.147983 | 0.030832 | 0 |
| chrX | 1.43E+08 | 1.43E+08 | 126 | 129 | 1.43E+08 | 0.162016 | 0.020394 | 0 |
| chrX | 1.43E+08 | 1.43E+08 | 184 | 235 | 1.43E+08 | -0.15699 | 0.024544 | 0 |
| chrX | 1.43E+08 | 1.44E+08 | 187 | 237 | 1.43E+08 | -0.14589 | 0.033648 | 0 |
| chrX | 1.44E+08 | 1.44E+08 | 196 | 250 | 1.44E+08 | -0.15511 | 0.025921 | 0 |
| chrX | 1.45E+08 | 1.45E+08 | 210 | 214 | 1.45E+08 | 0.168742 | 0.016566 | 0 |
| chrX | 1.45E+08 | 1.45E+08 | 209 | 211 | 1.45E+08 | 0.182223 | 0.010715 | 0 |
| chrX | 1.45E+08 | 1.45E+08 | 191 | 248 | 1.45E+08 | -0.1808  | 0.01181  | 0 |
| chrX | 1.46E+08 | 1.46E+08 | 188 | 237 | 1.46E+08 | -0.13819 | 0.04147  | 0 |
| chrX | 1.46E+08 | 1.46E+08 | 173 | 223 | 1.46E+08 | -0.17031 | 0.016456 | 0 |
| chrX | 1.47E+08 | 1.47E+08 | 215 | 273 | 1.47E+08 | -0.1486  | 0.031197 | 0 |
| chrX | 1.47E+08 | 1.47E+08 | 196 | 200 | 1.47E+08 | 0.166817 | 0.017593 | 0 |
| chrX | 1.47E+08 | 1.48E+08 | 228 | 287 | 1.48E+08 | -0.13605 | 0.043889 | 0 |
| chrX | 1.48E+08 | 1.48E+08 | 246 | 320 | 1.48E+08 | -0.18345 | 0.010838 | 0 |

|      |          |          |     |     |          |          |           |   |
|------|----------|----------|-----|-----|----------|----------|-----------|---|
| chrX | 1.48E+08 | 1.48E+08 | 209 | 266 | 1.48E+08 | -0.15196 | 0.028373  | 0 |
| chrX | 1.49E+08 | 1.49E+08 | 229 | 237 | 1.49E+08 | 0.146424 | 0.032227  | 0 |
| chrX | 1.49E+08 | 1.49E+08 | 109 | 139 | 1.49E+08 | -0.15479 | 0.02616   | 0 |
| chrX | 1.5E+08  | 1.5E+08  | 358 | 373 | 1.5E+08  | 0.136747 | 0.042092  | 0 |
| chrX | 1.5E+08  | 1.5E+08  | 284 | 366 | 1.5E+08  | -0.16999 | 0.016619  | 0 |
| chrX | 1.5E+08  | 1.5E+08  | 286 | 360 | 1.5E+08  | -0.13602 | 0.04393   | 0 |
| chrX | 1.5E+08  | 1.5E+08  | 335 | 342 | 1.5E+08  | 0.166128 | 0.017974  | 0 |
| chrX | 1.5E+08  | 1.5E+08  | 315 | 325 | 1.5E+08  | 0.150875 | 0.028378  | 0 |
| chrX | 1.51E+08 | 1.51E+08 | 261 | 270 | 1.51E+08 | 0.147053 | 0.031658  | 0 |
| chrX | 1.51E+08 | 1.52E+08 | 217 | 227 | 1.51E+08 | 0.130966 | 0.049071  | 0 |
| chrX | 1.52E+08 | 1.52E+08 | 275 | 282 | 1.52E+08 | 0.159699 | 0.021875  | 0 |
| chrX | 1.52E+08 | 1.52E+08 | 275 | 278 | 1.52E+08 | 0.18031  | 0.011416  | 0 |
| chrX | 1.52E+08 | 1.52E+08 | 283 | 295 | 1.52E+08 | 0.13605  | 0.042888  | 0 |
| chrX | 1.52E+08 | 1.52E+08 | 228 | 236 | 1.52E+08 | 0.14621  | 0.032422  | 0 |
| chrX | 1.52E+08 | 1.52E+08 | 122 | 158 | 1.52E+08 | -0.17708 | 0.013308  | 0 |
| chrX | 1.53E+08 | 1.53E+08 | 317 | 402 | 1.53E+08 | -0.14675 | 0.032852  | 0 |
| chrX | 1.53E+08 | 1.53E+08 | 414 | 423 | 1.53E+08 | 0.164936 | 0.018648  | 0 |
| chrX | 1.53E+08 | 1.54E+08 | 113 | 116 | 1.54E+08 | 0.158161 | 0.022908  | 0 |
| chrX | 1.54E+08 | 1.54E+08 | 314 | 323 | 1.54E+08 | 0.155193 | 0.025018  | 0 |
| chrY | 2650001  | 2750000  | 1   | 1   | 2700000  | 0.195963 | 0.006694  | 0 |
| chrY | 2700001  | 2800000  | 1   | 1   | 2750000  | 0.195963 | 0.006694  | 0 |
| chrY | 2900001  | 3000000  | 4   | 2   | 2950000  | 1.195963 | 1.84E-42  | 0 |
| chrY | 2950001  | 3050000  | 1   | 3   | 3.00E+06 | -1.389   | 6.26E-48  | 0 |
| chrY | 3000001  | 3100000  | 0   | 1   | 3050000  | #NAME?   | 3.67E-137 | 0 |
| chrY | 3450001  | 3550000  | 0   | 1   | 3500000  | #NAME?   | 3.67E-137 | 0 |
| chrY | 3500001  | 3600000  | 2   | 2   | 3550000  | 0.195963 | 0.006694  | 0 |
| chrY | 3550001  | 3650000  | 2   | 2   | 3600000  | 0.195963 | 0.006694  | 0 |
| chrY | 3600001  | 3700000  | 0   | 2   | 3650000  | #NAME?   | 3.67E-137 | 0 |
| chrY | 3650001  | 3750000  | 26  | 46  | 3700000  | -0.62716 | 2.93E-14  | 0 |
| chrY | 3700001  | 3800000  | 26  | 45  | 3750000  | -0.59545 | 3.98E-13  | 0 |
| chrY | 3750001  | 3850000  | 0   | 1   | 3800000  | #NAME?   | 3.67E-137 | 0 |
| chrY | 3800001  | 3900000  | 1   | 1   | 3850000  | 0.195963 | 0.006694  | 0 |
| chrY | 3850001  | 3950000  | 2   | 1   | 3900000  | 1.195963 | 1.84E-42  | 0 |
| chrY | 3900001  | 4000000  | 3   | 3   | 3950000  | 0.195963 | 0.006694  | 0 |
| chrY | 3950001  | 4050000  | 2   | 2   | 4.00E+06 | 0.195963 | 0.006694  | 0 |
| chrY | 4100001  | 4200000  | 0   | 1   | 4150000  | #NAME?   | 3.67E-137 | 0 |
| chrY | 4150001  | 4250000  | 0   | 1   | 4200000  | #NAME?   | 3.67E-137 | 0 |
| chrY | 4350001  | 4450000  | 1   | 1   | 4400000  | 0.195963 | 0.006694  | 0 |
| chrY | 4650001  | 4750000  | 0   | 1   | 4700000  | #NAME?   | 3.67E-137 | 0 |
| chrY | 4700001  | 4800000  | 1   | 1   | 4750000  | 0.195963 | 0.006694  | 0 |
| chrY | 4950001  | 5050000  | 1   | 1   | 5.00E+06 | 0.195963 | 0.006694  | 0 |
| chrY | 5000001  | 5100000  | 1   | 2   | 5050000  | -0.80404 | 3.29E-21  | 0 |
| chrY | 5050001  | 5150000  | 2   | 1   | 5100000  | 1.195963 | 1.84E-42  | 0 |
| chrY | 5200001  | 5300000  | 2   | 4   | 5250000  | -0.80404 | 3.29E-21  | 0 |
| chrY | 5250001  | 5350000  | 0   | 4   | 5300000  | #NAME?   | 3.67E-137 | 0 |
| chrY | 5400001  | 5500000  | 1   | 1   | 5450000  | 0.195963 | 0.006694  | 0 |
| chrY | 5650001  | 5750000  | 1   | 1   | 5700000  | 0.195963 | 0.006694  | 0 |

|      |          |          |     |     |          |          |           |   |
|------|----------|----------|-----|-----|----------|----------|-----------|---|
| chrY | 5700001  | 5800000  | 1   | 1   | 5750000  | 0.195963 | 0.006694  | 0 |
| chrY | 5750001  | 5850000  | 1   | 1   | 5800000  | 0.195963 | 0.006694  | 0 |
| chrY | 6350001  | 6450000  | 3   | 3   | 6400000  | 0.195963 | 0.006694  | 0 |
| chrY | 6400001  | 6500000  | 3   | 5   | 6450000  | -0.541   | 2.84E-11  | 0 |
| chrY | 7150001  | 7250000  | 0   | 1   | 7200000  | #NAME?   | 3.67E-137 | 0 |
| chrY | 7200001  | 7300000  | 0   | 2   | 7250000  | #NAME?   | 3.67E-137 | 0 |
| chrY | 7250001  | 7350000  | 0   | 1   | 7300000  | #NAME?   | 3.67E-137 | 0 |
| chrY | 7350001  | 7450000  | 2   | 1   | 7400000  | 1.195963 | 1.84E-42  | 0 |
| chrY | 7400001  | 7500000  | 1   | 1   | 7450000  | 0.195963 | 0.006694  | 0 |
| chrY | 8100001  | 8200000  | 0   | 1   | 8150000  | #NAME?   | 3.67E-137 | 0 |
| chrY | 8150001  | 8250000  | 0   | 1   | 8200000  | #NAME?   | 3.67E-137 | 0 |
| chrY | 8900001  | 9000000  | 0   | 1   | 8950000  | #NAME?   | 3.67E-137 | 0 |
| chrY | 8950001  | 9050000  | 0   | 1   | 9.00E+06 | #NAME?   | 3.67E-137 | 0 |
| chrY | 9000001  | 9100000  | 1   | 1   | 9050000  | 0.195963 | 0.006694  | 0 |
| chrY | 9050001  | 9150000  | 1   | 1   | 9100000  | 0.195963 | 0.006694  | 0 |
| chrY | 9350001  | 9450000  | 0   | 1   | 9400000  | #NAME?   | 3.67E-137 | 0 |
| chrY | 9400001  | 9500000  | 0   | 2   | 9450000  | #NAME?   | 3.67E-137 | 0 |
| chrY | 9450001  | 9550000  | 0   | 1   | 9500000  | #NAME?   | 3.67E-137 | 0 |
| chrY | 10050001 | 10150000 | 35  | 60  | 10100000 | -0.58164 | 1.21E-12  | 0 |
| chrY | 13150001 | 13250000 | 27  | 24  | 13200000 | 0.365888 | 2.19E-06  | 0 |
| chrY | 13200001 | 13300000 | 102 | 139 | 13250000 | -0.25055 | 0.000898  | 0 |
| chrY | 13250001 | 13350000 | 134 | 195 | 13300000 | -0.34528 | 9.79E-06  | 0 |
| chrY | 13300001 | 13400000 | 53  | 83  | 13350000 | -0.45116 | 1.69E-08  | 0 |
| chrY | 13350001 | 13450000 | 174 | 242 | 13400000 | -0.27996 | 0.00025   | 0 |
| chrY | 13700001 | 13800000 | 24  | 33  | 13750000 | -0.26347 | 0.000519  | 0 |
| chrY | 13900001 | 14000000 | 4   | 2   | 13950000 | 1.195963 | 1.84E-42  | 0 |
| chrY | 13950001 | 14050000 | 2   | 1   | 1.40E+07 | 1.195963 | 1.84E-42  | 0 |
| chrY | 14000001 | 14100000 | 1   | 1   | 14050000 | 0.195963 | 0.006694  | 0 |
| chrY | 14050001 | 14150000 | 2   | 1   | 14100000 | 1.195963 | 1.84E-42  | 0 |
| chrY | 14850001 | 14950000 | 1   | 1   | 14900000 | 0.195963 | 0.006694  | 0 |
| chrY | 14900001 | 15000000 | 0   | 1   | 14950000 | #NAME?   | 3.67E-137 | 0 |
| chrY | 15550001 | 15650000 | 3   | 2   | 15600000 | 0.780926 | 1.60E-21  | 0 |
| chrY | 15600001 | 15700000 | 3   | 2   | 15650000 | 0.780926 | 1.60E-21  | 0 |
| chrY | 15800001 | 15900000 | 0   | 1   | 15850000 | #NAME?   | 3.67E-137 | 0 |
| chrY | 15850001 | 15950000 | 0   | 1   | 15900000 | #NAME?   | 3.67E-137 | 0 |
| chrY | 15950001 | 16050000 | 0   | 1   | 1.60E+07 | #NAME?   | 3.67E-137 | 0 |
| chrY | 16000001 | 16100000 | 1   | 1   | 16050000 | 0.195963 | 0.006694  | 0 |
| chrY | 16350001 | 16450000 | 1   | 1   | 16400000 | 0.195963 | 0.006694  | 0 |
| chrY | 16400001 | 16500000 | 2   | 2   | 16450000 | 0.195963 | 0.006694  | 0 |
| chrY | 16450001 | 16550000 | 1   | 2   | 16500000 | -0.80404 | 3.29E-21  | 0 |
| chrY | 16500001 | 16600000 | 0   | 1   | 16550000 | #NAME?   | 3.67E-137 | 0 |
| chrY | 16800001 | 16900000 | 0   | 1   | 16850000 | #NAME?   | 3.67E-137 | 0 |
| chrY | 16850001 | 16950000 | 0   | 1   | 16900000 | #NAME?   | 3.67E-137 | 0 |
| chrY | 17200001 | 17300000 | 0   | 1   | 17250000 | #NAME?   | 3.67E-137 | 0 |
| chrY | 17250001 | 17350000 | 1   | 1   | 17300000 | 0.195963 | 0.006694  | 0 |
| chrY | 17750001 | 17850000 | 2   | 4   | 17800000 | -0.80404 | 3.29E-21  | 0 |
| chrY | 17800001 | 17900000 | 3   | 4   | 17850000 | -0.21907 | 0.003112  | 0 |



|      |          |          |    |   |          |          |           |   |
|------|----------|----------|----|---|----------|----------|-----------|---|
| chrY | 17850001 | 17950000 | 2  | 1 | 17900000 | 1.195963 | 1.84E-42  | 0 |
| chrY | 17900001 | 18000000 | 2  | 3 | 17950000 | -0.389   | 8.31E-07  | 0 |
| chrY | 17950001 | 18050000 | 1  | 3 | 1.80E+07 | -1.389   | 6.26E-48  | 0 |
| chrY | 18000001 | 18100000 | 0  | 1 | 18050000 | #NAME?   | 3.67E-137 | 0 |
| chrY | 18150001 | 18250000 | 1  | 1 | 18200000 | 0.195963 | 0.006694  | 0 |
| chrY | 18200001 | 18300000 | 0  | 1 | 18250000 | #NAME?   | 3.67E-137 | 0 |
| chrY | 18650001 | 18750000 | 0  | 1 | 18700000 | #NAME?   | 3.67E-137 | 0 |
| chrY | 18700001 | 18800000 | 0  | 2 | 18750000 | #NAME?   | 3.67E-137 | 0 |
| chrY | 18750001 | 18850000 | 0  | 1 | 18800000 | #NAME?   | 3.67E-137 | 0 |
| chrY | 18900001 | 19000000 | 3  | 2 | 18950000 | 0.780926 | 1.60E-21  | 0 |
| chrY | 18950001 | 19050000 | 4  | 4 | 1.90E+07 | 0.195963 | 0.006694  | 0 |
| chrY | 19000001 | 19100000 | 2  | 2 | 19050000 | 0.195963 | 0.006694  | 0 |
| chrY | 19150001 | 19250000 | 1  | 1 | 19200000 | 0.195963 | 0.006694  | 0 |
| chrY | 19200001 | 19300000 | 2  | 2 | 19250000 | 0.195963 | 0.006694  | 0 |
| chrY | 19250001 | 19350000 | 3  | 1 | 19300000 | 1.780926 | 4.68E-73  | 0 |
| chrY | 19300001 | 19400000 | 2  | 2 | 19350000 | 0.195963 | 0.006694  | 0 |
| chrY | 19350001 | 19450000 | 1  | 2 | 19400000 | -0.80404 | 3.29E-21  | 0 |
| chrY | 20000001 | 20100000 | 0  | 1 | 20050000 | #NAME?   | 3.67E-137 | 0 |
| chrY | 20050001 | 20150000 | 0  | 1 | 20100000 | #NAME?   | 3.67E-137 | 0 |
| chrY | 20550001 | 20650000 | 0  | 1 | 20600000 | #NAME?   | 3.67E-137 | 0 |
| chrY | 20600001 | 20700000 | 0  | 1 | 20650000 | #NAME?   | 3.67E-137 | 0 |
| chrY | 21050001 | 21150000 | 0  | 1 | 21100000 | #NAME?   | 3.67E-137 | 0 |
| chrY | 21100001 | 21200000 | 13 | 8 | 21150000 | 0.896403 | 5.56E-27  | 0 |
| chrY | 21150001 | 21250000 | 13 | 7 | 21200000 | 1.089048 | 8.60E-37  | 0 |
| chrY | 21500001 | 21600000 | 1  | 1 | 21550000 | 0.195963 | 0.006694  | 0 |
| chrY | 21800001 | 21900000 | 2  | 1 | 21850000 | 1.195963 | 1.84E-42  | 0 |
| chrY | 22100001 | 22200000 | 0  | 1 | 22150000 | #NAME?   | 3.67E-137 | 0 |
| chrY | 22150001 | 22250000 | 0  | 1 | 22200000 | #NAME?   | 3.67E-137 | 0 |
| chrY | 22650001 | 22750000 | 0  | 1 | 22700000 | #NAME?   | 3.67E-137 | 0 |
| chrY | 22700001 | 22800000 | 0  | 1 | 22750000 | #NAME?   | 3.67E-137 | 0 |
| chrY | 23750001 | 23850000 | 0  | 1 | 23800000 | #NAME?   | 3.67E-137 | 0 |
| chrY | 23800001 | 23900000 | 0  | 1 | 23850000 | #NAME?   | 3.67E-137 | 0 |
| chrY | 23900001 | 24000000 | 0  | 1 | 23950000 | #NAME?   | 3.67E-137 | 0 |
| chrY | 23950001 | 24050000 | 0  | 1 | 2.40E+07 | #NAME?   | 3.67E-137 | 0 |
| chrY | 24350001 | 24450000 | 0  | 1 | 24400000 | #NAME?   | 3.67E-137 | 0 |
| chrY | 24400001 | 24500000 | 0  | 1 | 24450000 | #NAME?   | 3.67E-137 | 0 |
| chrY | 25150001 | 25250000 | 0  | 1 | 25200000 | #NAME?   | 3.67E-137 | 0 |
| chrY | 25200001 | 25300000 | 0  | 1 | 25250000 | #NAME?   | 3.67E-137 | 0 |
| chrY | 25350001 | 25450000 | 0  | 1 | 25400000 | #NAME?   | 3.67E-137 | 0 |
| chrY | 25400001 | 25500000 | 1  | 1 | 25450000 | 0.195963 | 0.006694  | 0 |
| chrY | 26000001 | 26100000 | 1  | 2 | 26050000 | -0.80404 | 3.29E-21  | 0 |
| chrY | 26050001 | 26150000 | 1  | 2 | 26100000 | -0.80404 | 3.29E-21  | 0 |
| chrY | 26400001 | 26500000 | 0  | 1 | 26450000 | #NAME?   | 3.67E-137 | 0 |
| chrY | 26450001 | 26550000 | 0  | 1 | 26500000 | #NAME?   | 3.67E-137 | 0 |
| chrY | 27700001 | 27800000 | 0  | 1 | 27750000 | #NAME?   | 3.67E-137 | 0 |
| chrY | 27750001 | 27850000 | 0  | 1 | 27800000 | #NAME?   | 3.67E-137 | 0 |
| chrY | 28400001 | 28500000 | 0  | 1 | 28450000 | #NAME?   | 3.67E-137 | 0 |

|      |          |          |     |     |          |          |           |   |
|------|----------|----------|-----|-----|----------|----------|-----------|---|
| chrY | 28450001 | 28550000 | 0   | 1   | 28500000 | #NAME?   | 3.67E-137 | 0 |
| chrY | 28550001 | 28650000 | 4   | 7   | 28600000 | -0.61139 | 1.08E-13  | 0 |
| chrY | 28600001 | 28700000 | 2   | 4   | 28650000 | -0.80404 | 3.29E-21  | 0 |
| chrY | 28650001 | 28750000 | 2   | 3   | 28700000 | -0.389   | 8.31E-07  | 0 |
| chrY | 28800001 | 28900000 | 21  | 20  | 28850000 | 0.266352 | 0.000395  | 0 |
| chrY | 58750001 | 58850000 | 7   | 7   | 58800000 | 0.195963 | 0.006694  | 0 |
| chrY | 58800001 | 58900000 | 9   | 8   | 58850000 | 0.365888 | 2.19E-06  | 0 |
| chrY | 58850001 | 58950000 | 3   | 1   | 58900000 | 1.780926 | 4.68E-73  | 0 |
| chrY | 13100001 | 13200000 | 86  | 89  | 13150000 | 0.146494 | 0.032163  | 0 |
| chrY | 58900001 | 59000000 | 692 | 870 | 58950000 | -0.13428 | 0.045981  | 0 |

| cnv.size | cnv.log2     | cnv.p.value |
|----------|--------------|-------------|
| 250000   | -1.541002559 | 2.83E-265   |
| 2.00E+05 | -1.569571711 | 8.99E-218   |
| 3.00E+05 | -2.125965059 | 0           |
| 350000   | -1.492092958 | 0           |
| 350000   | -1.492092958 | 0           |
| 350000   | -1.492092958 | 0           |
| 350000   | -1.492092958 | 0           |
| 350000   | -1.492092958 | 0           |
| 350000   | -1.492092958 | 0           |
| 3.00E+05 | -1.251495942 | 8.02E-238   |
| 2.00E+05 | 0.973570614  | 9.78E-117   |
| 250000   | -1.070823505 | 1.54E-156   |
| 2.00E+05 | 1.026038034  | 2.05E-127   |
| 2.00E+05 | 1.026038034  | 2.05E-127   |
| 2.00E+05 | 1.026038034  | 2.05E-127   |
| 2.00E+05 | -1.71092756  | 1.44E-242   |
| 2.00E+05 | 2.003317957  | 0           |
| 2.00E+05 | 2.003317957  | 0           |

|          |              |           |
|----------|--------------|-----------|
| 250000   | #NAME?       | 0         |
| 250000   | -1.541002559 | 2.83E-265 |
| 2.00E+05 | #NAME?       | 0         |
| 2.00E+05 | -2.125965059 | 0         |
| 250000   | -2.125965059 | 0         |
| 250000   | -2.125965059 | 0         |
| 250000   | -2.125965059 | 0         |
| 250000   | -2.125965059 | 0         |
| 250000   | -2.125965059 | 0         |
| 2.00E+05 | -0.804036965 | 1.59E-78  |
| 3.00E+05 | 2.003317957  | 0         |
| 3.00E+05 | 2.003317957  | 0         |
| 250000   | 1.574474659  | 1.02E-303 |
| 4.00E+05 | -1.334551681 | 0         |
| NA       | NA           | NA        |
